# Supplementary material for: Strategy to Develop and Evaluate a Multiplex RT-ddPCR in Response to SARS-CoV-2 Genomic Evolution
Source: MDPI journal article supplement (doi:10.3390/cimb43030134), 2021-11-06
Supplement: s1 [file s1]

We gratefully acknowledge the following Authors from the Originating laboratories responsible for obtaining the specimens, as well as the Submitting laboratories where the genome data were generated and shared via GISAID, on which this research is based.

All Submitters of data may be contacted directly via [www.gisaid.org](http://www.gisaid.org)

Authors are sorted alphabetically.

| Accession ID                                                                                                                                                                                                                                                                                                                                                                                                                                                                                                                                                                                                                                                                                                                                                                                                 | Originating Laboratory                                                                | Submitting Laboratory                                                                 | Authors                                                                                                                                                                                                                                                                                                                                                                                                                                                                  |
|--------------------------------------------------------------------------------------------------------------------------------------------------------------------------------------------------------------------------------------------------------------------------------------------------------------------------------------------------------------------------------------------------------------------------------------------------------------------------------------------------------------------------------------------------------------------------------------------------------------------------------------------------------------------------------------------------------------------------------------------------------------------------------------------------------------|---------------------------------------------------------------------------------------|---------------------------------------------------------------------------------------|--------------------------------------------------------------------------------------------------------------------------------------------------------------------------------------------------------------------------------------------------------------------------------------------------------------------------------------------------------------------------------------------------------------------------------------------------------------------------|
| EPI_ISL_1005008, EPI_ISL_1005011, EPI_ISL_1005107                                                                                                                                                                                                                                                                                                                                                                                                                                                                                                                                                                                                                                                                                                                                                            | Viollier AG                                                                           | Department of Biosystems Science and Engineering, ETH Zürich                          | Chaoran Chen, Sarah Nadeau, Catharine Aquino, Ivan Topolsky, Philipp Jablonski, Lara Fuhrmann, David Dreifuss, Katharina Jahn, Andreia Cabral de Gouvea, Maria Domenica Moccia, Simon Grüter, Timothy Sykes, Lennart Opitz, Griffin White, Laura Neff, Doris Popovic, Andrea Patrignani, Jay Tracy, Ralph Schlapbach, Christiane Beckmann, Maurice Redondo, Olivier Kobel, Christoph Noppen, Sophie Seidel, Noemie Santamaria de Souza, Niko Beerenwinkel, Tanja Stadler |
| EPI_ISL_1005559, EPI_ISL_1005568, EPI_ISL_1005569, EPI_ISL_1005658, EPI_ISL_1005660                                                                                                                                                                                                                                                                                                                                                                                                                                                                                                                                                                                                                                                                                                                          | Instituto Nacional de Medicina Genomica                                               | Instituto Nacional de Medicina Genomica                                               | Hidalgo-Miranda A, Mendoza-Vargas A, Reyes-Grajeda JP, Cisneros-Villanueva M, Cedro-Tanda A,Peñaloza-Figueroa F, Herrera-Montalvo LA                                                                                                                                                                                                                                                                                                                                     |
| EPI_ISL_1007678, EPI_ISL_1007679                                                                                                                                                                                                                                                                                                                                                                                                                                                                                                                                                                                                                                                                                                                                                                             | Department of Internal Medicine, College of Medicine, Chosun University               | Department of Internal Medicine, College of Medicine, Chosun University               | Dong-Min Kim                                                                                                                                                                                                                                                                                                                                                                                                                                                             |
| EPI_ISL_1007700, EPI_ISL_1007702, EPI_ISL_1007705, EPI_ISL_1007706, EPI_ISL_1007708, EPI_ISL_1007711                                                                                                                                                                                                                                                                                                                                                                                                                                                                                                                                                                                                                                                                                                         | Hospital Universitario Marqués de Valdecilla - IDIVAL (Santander, Cantabria)          | SeqCOVID-SPAIN consortium/IBV(CSIC)                                                   | Mónica Gozalo Margüello, María Eleicer Cano García, Jose Manuel Méndez Legaza, Daniel Pablo Marcos, Jesús Rodríguez Rodríguez, María Siller Ruiz and SeqCOVID-SPAIN consortium                                                                                                                                                                                                                                                                                           |
| EPI_ISL_1008426, EPI_ISL_1008427, EPI_ISL_1008428, EPI_ISL_1008429, EPI_ISL_1008430, EPI_ISL_1008431                                                                                                                                                                                                                                                                                                                                                                                                                                                                                                                                                                                                                                                                                                         | Klinisk mikrobiologi                                                                  | The Public Health Agency of Sweden                                                    | Anna-Malin Linde, Maria Lind Karlberg, Carlo Berg, Oskar Karlsson Lindsjo, Sofia Stamouli, Reza Advani, Mattias Haukland, Petra Holmstrom, Noura Walai, Petra Edquist, Mia Brytting, Anna Risberg, Karin Tegmark-Wisell                                                                                                                                                                                                                                                  |
| EPI_ISL_1008552                                                                                                                                                                                                                                                                                                                                                                                                                                                                                                                                                                                                                                                                                                                                                                                              | Klinisk Mikrobiologi                                                                  | The Public Health Agency of Sweden                                                    | Anna-Malin Linde, Maria Lind Karlberg, Carlo Berg, Oskar Karlsson Lindsjo, Sofia Stamouli, Reza Advani, Mattias Haukland, Petra Holmstrom, Noura Walai, Petra Edquist, Mia Brytting, Anna Risberg, Karin Tegmark-Wisell                                                                                                                                                                                                                                                  |
| EPI_ISL_1009168, EPI_ISL_1009177, EPI_ISL_1009179, EPI_ISL_1009199                                                                                                                                                                                                                                                                                                                                                                                                                                                                                                                                                                                                                                                                                                                                           | American Esoteric Laboratories                                                        | Colleen B. Jonsson                                                                    | Mariah K. Taylor, Walter Reichard, Jyothi Parvathareddy, Colleen B. Jonsson                                                                                                                                                                                                                                                                                                                                                                                              |
| EPI_ISL_1010735                                                                                                                                                                                                                                                                                                                                                                                                                                                                                                                                                                                                                                                                                                                                                                                              | University of Iowa Hospitals & Clinics, Microbiology Laboratory                       | University of Iowa, Lung Biology and Cystic Fibrosis Research Center, Pezzulo Lab     | Miguel E Ortiz, Alejandro A Pezzulo                                                                                                                                                                                                                                                                                                                                                                                                                                      |
| EPI_ISL_1011534                                                                                                                                                                                                                                                                                                                                                                                                                                                                                                                                                                                                                                                                                                                                                                                              | Massachusetts General Hospital                                                        | Infectious Disease Program, Broad Institute of Harvard and MIT                        | Lemieux,J.E., Siddle,K.J., Shaw,B., Adams,G., Pierce,V., Turbett,S., Anahtar,M., Branda,J., Slater,D., Harris,J., Lin,A.E., Gladden-Young,A., Lagerborg,K., Rudy,M., DeRuff,K., Carter,A., Normandin,E., Bauer,M., Reilly,S., Tomkins-Tinch,C., Loreth,C., Chaluvadi,S., Neumann,A., Cusick,C., Chapman,S.B., Gnirke,A., Flowers,K., Cerrato,F., Birren,B.W., Gallagher,G., Smole,S., Park,D.J., MacInnis,B.L., Ryan,E., LaRocque,R., Rosenberg,E. and Sabeti,P.C.       |
| EPI_ISL_1014451, EPI_ISL_1014453, EPI_ISL_1014454, EPI_ISL_1014455, EPI_ISL_1014456, EPI_ISL_1014458, EPI_ISL_1014459, EPI_ISL_1014465, EPI_ISL_1014466, EPI_ISL_1014467, EPI_ISL_1014468, EPI_ISL_1014469, EPI_ISL_1014572, EPI_ISL_1014573, EPI_ISL_1014574, EPI_ISL_1014575, EPI_ISL_1014576, EPI_ISL_1014577                                                                                                                                                                                                                                                                                                                                                                                                                                                                                             |                                                                                       |                                                                                       |                                                                                                                                                                                                                                                                                                                                                                                                                                                                          |
| see above                                                                                                                                                                                                                                                                                                                                                                                                                                                                                                                                                                                                                                                                                                                                                                                                    | Dutch COVID-19 response team                                                          | National Institute for Public Health and the Environment (RIVM)                       | Adam Meijer, Harry Vennema, Dirk Eggink, Jeroen Cremer, Sharon van den Brink, Bas van der Veer, AnneMarie van den Brandt, Florian Zwagemaker, Dennis Schmitz, Chantal Reusken, on behalf of the national COVID-19 response team                                                                                                                                                                                                                                          |
| EPI_ISL_1015203, EPI_ISL_1015312, EPI_ISL_1015313, EPI_ISL_1015315, EPI_ISL_1015317, EPI_ISL_1015323                                                                                                                                                                                                                                                                                                                                                                                                                                                                                                                                                                                                                                                                                                         | Department of Virology, Pitié-Salpêtrière hospital                                    | Department of Virology, Pitié-Salpêtrière hospital                                    | Valentin Leducq, Aude Jary, Karen Zafilaza, Stéphane Marot, Vincent Calvez, Anne-Geneviève Marcelin                                                                                                                                                                                                                                                                                                                                                                      |
| EPI_ISL_1015754                                                                                                                                                                                                                                                                                                                                                                                                                                                                                                                                                                                                                                                                                                                                                                                              | Seattle Flu Study                                                                     | Seattle Flu Study                                                                     | Deborah A. Nickerson, Chris D. Frazar, Jover Lee, Benjamin Pelle, Erica Ryke, Matthew Richardson, Amanda Adler, Elisabeth Brandstetter, Peter D. Han, Kairsten Fay, Misja Ilcisin, Kirsten Lacombe, Thomas R. Sibley, Melissa Truong, Caitlin R. Wolf, Karen Cowgill, Stephanie Schrag, Jeff Duchin, Michael Boeckh, Janet A. Englund, Michael Famulare, Barry R. Lutz, Mark J. Rieder, Lea M. Starita, Matthew Thompson, Helen Y. Chu, Trevor Bedford, Jay Shendure     |
| EPI_ISL_1016507                                                                                                                                                                                                                                                                                                                                                                                                                                                                                                                                                                                                                                                                                                                                                                                              | University of Miami Immunology and Histocompatibility Laboratory                      | University of Miami Immunology and Histocompatibility Laboratory                      | Emilio Margolles-Clark, PhD and Phillip Ruiz, MD, PhD                                                                                                                                                                                                                                                                                                                                                                                                                    |
| EPI_ISL_1016954, EPI_ISL_1016955, EPI_ISL_1016956, EPI_ISL_1016962                                                                                                                                                                                                                                                                                                                                                                                                                                                                                                                                                                                                                                                                                                                                           | UNMC Emerging Pathogens Laboratory                                                    | UNMC COVID-19 Response Team                                                           | UNMC COVID-19 Response Team                                                                                                                                                                                                                                                                                                                                                                                                                                              |
| EPI_ISL_1017053                                                                                                                                                                                                                                                                                                                                                                                                                                                                                                                                                                                                                                                                                                                                                                                              | Providence Oregon Regional Laboratories                                               | Providence St. Joseph Health Molecular Genomics Laboratory                            | Alexa K Dowdell, Brian D Piening, Fred L Robinson, Carlo B Bifulco, Mary Campbell                                                                                                                                                                                                                                                                                                                                                                                        |
| EPI_ISL_1017066                                                                                                                                                                                                                                                                                                                                                                                                                                                                                                                                                                                                                                                                                                                                                                                              | Providence Alaska Medical Center                                                      | Providence St. Joseph Health Molecular Genomics Laboratory                            | Alexa K Dowdell, Brian D Piening, Fred L Robinson, Carlo B Bifulco, Mary Campbell                                                                                                                                                                                                                                                                                                                                                                                        |
| EPI_ISL_1017069, EPI_ISL_1017173, EPI_ISL_1017174, EPI_ISL_1017175, EPI_ISL_1017176, EPI_ISL_1017177, EPI_ISL_1017178, EPI_ISL_1017179                                                                                                                                                                                                                                                                                                                                                                                                                                                                                                                                                                                                                                                                       | Providence Oregon Regional Laboratories                                               | Providence St. Joseph Health Molecular Genomics Laboratory                            | Alexa K Dowdell, Brian D Piening, Fred L Robinson, Carlo B Bifulco, Mary Campbell                                                                                                                                                                                                                                                                                                                                                                                        |
| EPI_ISL_1017180                                                                                                                                                                                                                                                                                                                                                                                                                                                                                                                                                                                                                                                                                                                                                                                              | Providence Regional Medical Center Everett                                            | Providence St. Joseph Health Molecular Genomics Laboratory                            | Alexa K Dowdell, Brian D Piening, Fred L Robinson, Carlo B Bifulco, Mary Campbell                                                                                                                                                                                                                                                                                                                                                                                        |
| EPI_ISL_1017181, EPI_ISL_1017182, EPI_ISL_1017183, EPI_ISL_1017184, EPI_ISL_1017185, EPI_ISL_1017186                                                                                                                                                                                                                                                                                                                                                                                                                                                                                                                                                                                                                                                                                                         | Providence Oregon Regional Laboratories                                               | Providence St. Joseph Health Molecular Genomics Laboratory                            | Alexa K Dowdell, Brian D Piening, Fred L Robinson, Carlo B Bifulco, Mary Campbell                                                                                                                                                                                                                                                                                                                                                                                        |
| EPI_ISL_1017187, EPI_ISL_1017188, EPI_ISL_1017189, EPI_ISL_1017190, EPI_ISL_1017191, EPI_ISL_1017192, EPI_ISL_1017193, EPI_ISL_1017194, EPI_ISL_1017195, EPI_ISL_1017196, EPI_ISL_1017197, EPI_ISL_1017198, EPI_ISL_1017199, EPI_ISL_1017200, EPI_ISL_1017201, EPI_ISL_1017202, EPI_ISL_1017203, EPI_ISL_1017204, EPI_ISL_1017205, EPI_ISL_1017206, EPI_ISL_1017207, EPI_ISL_1017208, EPI_ISL_1017209, EPI_ISL_1017210, EPI_ISL_1017211, EPI_ISL_1017212, EPI_ISL_1017213, EPI_ISL_1017214, EPI_ISL_1017215                                                                                                                                                                                                                                                                                                  |                                                                                       |                                                                                       |                                                                                                                                                                                                                                                                                                                                                                                                                                                                          |
| see above                                                                                                                                                                                                                                                                                                                                                                                                                                                                                                                                                                                                                                                                                                                                                                                                    | Providence Alaska Medical Center                                                      | Providence St. Joseph Health Molecular Genomics Laboratory                            | Alexa K Dowdell, Brian D Piening, Fred L Robinson, Carlo B Bifulco, Mary Campbell                                                                                                                                                                                                                                                                                                                                                                                        |
| EPI_ISL_1018099, EPI_ISL_1018100, EPI_ISL_1018101                                                                                                                                                                                                                                                                                                                                                                                                                                                                                                                                                                                                                                                                                                                                                            | Immunology, Noguchi Memorial Institute for Medical Research                           | Immunology, Noguchi Memorial Institute for Medical Research                           | Adu,B., Egyir,B., Kumordjie,S., Agbodzi,B., Yeboah,C., Mohktar,Q., Oteng,F., Owusu-Nyantakyi,C., Asare,K.M., Appiah-Kubi,J., Adusei-Poku,M.A., Odoom,J.K., Ampofo,W.K., Bonney,J.K.                                                                                                                                                                                                                                                                                      |
| EPI_ISL_1019655, EPI_ISL_1019699, EPI_ISL_1019705, EPI_ISL_1019726, EPI_ISL_1019737, EPI_ISL_1019742, EPI_ISL_1019750, EPI_ISL_1019778, EPI_ISL_1019783, EPI_ISL_1019813, EPI_ISL_1019846, EPI_ISL_1019853, EPI_ISL_1019855, EPI_ISL_1019858, EPI_ISL_1019863, EPI_ISL_1019872, EPI_ISL_1019875, EPI_ISL_1019877, EPI_ISL_1019880, EPI_ISL_1019882, EPI_ISL_1019888, EPI_ISL_1019893, EPI_ISL_1020022, EPI_ISL_1020025, EPI_ISL_1020027, EPI_ISL_1020028, EPI_ISL_1020029, EPI_ISL_1020030, EPI_ISL_1020031, EPI_ISL_1020032, EPI_ISL_1020034, EPI_ISL_1020036, EPI_ISL_1020037, EPI_ISL_1020041, EPI_ISL_1020043, EPI_ISL_1020045, EPI_ISL_1020046, EPI_ISL_1020049, EPI_ISL_1020050, EPI_ISL_1020051, EPI_ISL_1020053, EPI_ISL_1020054, EPI_ISL_1020055, EPI_ISL_1020059, EPI_ISL_1020062, EPI_ISL_1020063 |                                                                                       |                                                                                       |                                                                                                                                                                                                                                                                                                                                                                                                                                                                          |
| see above                                                                                                                                                                                                                                                                                                                                                                                                                                                                                                                                                                                                                                                                                                                                                                                                    | Department of Health Technology and Informatics, The Hong Kong Polytechnic University | Department of Health Technology and Informatics, The Hong Kong Polytechnic University | Gilman Kit-Hang Siu, Lam-Kwong Lee, Kenneth Siu-Sing Leung, Jake Siu-Lun Leung, Timothy Ting-Leung Ng, Chloe Toi-Mei Chan, Kingsley King-Gee Tam, Hiu-Yin Lao, Denise Sze-Hang Wong, Alan Ka-Lun Wu, Miranda Chong-Yee Yau, Yvette Wai-Man Lai, Kitty Sau-Chun Fung, Sandy Ka-Yee Chau, Barry Kin-Chung Wong, Wing-Kin To, Kristine Luk, Alex Yat-Man Ho, Tak-Lun Que, Kam-Tong Yip, Wing Cheong Yam, David Ho-Keung Shum, Shea Ping Yip                                 |
| EPI_ISL_1020196                                                                                                                                                                                                                                                                                                                                                                                                                                                                                                                                                                                                                                                                                                                                                                                              | RS PMI, Bogor, West Java                                                              | Biosafety Level-3 Laboratory, Indonesian Institute of Sciences (LIPI)                 | Anggia Prasetyoputri, Isa Nuryana, Sri Swasthikawati, Sugiyono Saputra, Syam Budi Iryanto, Eko Wahyu Putro, Ratih Asmana Ningrum                                                                                                                                                                                                                                                                                                                                         |

|                                                                                                                                                                                                                                                                                                                                                                                                                                                                                                                                                                                                                                                     |                                                                          |                                                                                                          |                                                                                                                                                                                                                                                                                                                                                                                                                                                                           |                                                                                                                                                                                                                                                           |                                                                    |                                  |                                                                                                      |                 |                                                   |                                                                                                                       |                                                                                                                                                                                                                                                                                                                                   |
|-----------------------------------------------------------------------------------------------------------------------------------------------------------------------------------------------------------------------------------------------------------------------------------------------------------------------------------------------------------------------------------------------------------------------------------------------------------------------------------------------------------------------------------------------------------------------------------------------------------------------------------------------------|--------------------------------------------------------------------------|----------------------------------------------------------------------------------------------------------|---------------------------------------------------------------------------------------------------------------------------------------------------------------------------------------------------------------------------------------------------------------------------------------------------------------------------------------------------------------------------------------------------------------------------------------------------------------------------|-----------------------------------------------------------------------------------------------------------------------------------------------------------------------------------------------------------------------------------------------------------|--------------------------------------------------------------------|----------------------------------|------------------------------------------------------------------------------------------------------|-----------------|---------------------------------------------------|-----------------------------------------------------------------------------------------------------------------------|-----------------------------------------------------------------------------------------------------------------------------------------------------------------------------------------------------------------------------------------------------------------------------------------------------------------------------------|
| EPI_ISL_1020287, EPI_ISL_1020289, EPI_ISL_1020290, EPI_ISL_1020293                                                                                                                                                                                                                                                                                                                                                                                                                                                                                                                                                                                  | AZ Klina                                                                 | AZ Klina                                                                                                 | Dr. C. Vael                                                                                                                                                                                                                                                                                                                                                                                                                                                               |                                                                                                                                                                                                                                                           |                                                                    |                                  |                                                                                                      |                 |                                                   |                                                                                                                       |                                                                                                                                                                                                                                                                                                                                   |
| EPI_ISL_1025908, EPI_ISL_1025909, EPI_ISL_1025911, EPI_ISL_1025914, EPI_ISL_1025915, EPI_ISL_1025916, EPI_ISL_1025919, EPI_ISL_1025920, EPI_ISL_1025921, EPI_ISL_1025922, EPI_ISL_1025923, EPI_ISL_1025925, EPI_ISL_1025927, EPI_ISL_1025929, EPI_ISL_1025930, EPI_ISL_1025931, EPI_ISL_1025932, EPI_ISL_1025936, EPI_ISL_1025938, EPI_ISL_1025939, EPI_ISL_1025941, EPI_ISL_1025942, EPI_ISL_1025943, EPI_ISL_1025944, EPI_ISL_1025945, EPI_ISL_1025947, EPI_ISL_1025948, EPI_ISL_1025950, EPI_ISL_1025951, EPI_ISL_1025952, EPI_ISL_1025953, EPI_ISL_1025954, EPI_ISL_1025955, EPI_ISL_1025956, EPI_ISL_1025957, EPI_ISL_1025959, EPI_ISL_1025960 | see above                                                                | Department of Virus and Microbiological Special Diagnostics, Statens Serum Institut, Copenhagen, Denmark | Aalborg University                                                                                                                                                                                                                                                                                                                                                                                                                                                        | Danish Covid-19 Genome Consortium                                                                                                                                                                                                                         |                                                                    |                                  |                                                                                                      |                 |                                                   |                                                                                                                       |                                                                                                                                                                                                                                                                                                                                   |
| EPI_ISL_1027472                                                                                                                                                                                                                                                                                                                                                                                                                                                                                                                                                                                                                                     | EPI_ISL_1027535, EPI_ISL_1027539                                         | EPI_ISL_1032931, EPI_ISL_1032932                                                                         | EPI_ISL_1034612, EPI_ISL_1034613, EPI_ISL_1034614, EPI_ISL_1034621, EPI_ISL_1034622, EPI_ISL_1034623, EPI_ISL_1034624, EPI_ISL_1034625, EPI_ISL_1034626, EPI_ISL_1034627, EPI_ISL_1034628, EPI_ISL_1034629, EPI_ISL_1034630, EPI_ISL_1034631, EPI_ISL_1034632, EPI_ISL_1034633, EPI_ISL_1034635, EPI_ISL_1034636, EPI_ISL_1034666, EPI_ISL_1034721, EPI_ISL_1034726, EPI_ISL_1034728, EPI_ISL_1034729, EPI_ISL_1034732, EPI_ISL_1034733, EPI_ISL_1034734, EPI_ISL_1034735 | see above                                                                                                                                                                                                                                                 | EPI_ISL_1035248, EPI_ISL_1035249, EPI_ISL_1035663, EPI_ISL_1035697 | EPI_ISL_1036235, EPI_ISL_1036236 | EPI_ISL_1036324, EPI_ISL_1036325, EPI_ISL_1036327, EPI_ISL_1036329, EPI_ISL_1036330, EPI_ISL_1036333 | EPI_ISL_1038791 | EPI_ISL_1038852, EPI_ISL_1038853, EPI_ISL_1038854 | EPI_ISL_1038945, EPI_ISL_1038952, EPI_ISL_1038956, EPI_ISL_1038961, EPI_ISL_1038962, EPI_ISL_1038963, EPI_ISL_1038964 | EPI_ISL_1039058, EPI_ISL_1039070, EPI_ISL_1039073, EPI_ISL_1039079, EPI_ISL_1039082, EPI_ISL_1039086, EPI_ISL_1039089, EPI_ISL_1039095, EPI_ISL_1039097, EPI_ISL_1039099, EPI_ISL_1039101, EPI_ISL_1039102, EPI_ISL_1039103, EPI_ISL_1039104, EPI_ISL_1039113, EPI_ISL_1039118, EPI_ISL_1039119, EPI_ISL_1039122, EPI_ISL_1039123 |
| see above                                                                                                                                                                                                                                                                                                                                                                                                                                                                                                                                                                                                                                           | Department of Microbiology, The University of Hong Kong                  | Department of Microbiology, The University of Hong Kong                                                  | Kelvin K.W. To, Kwok-Yung Yuen                                                                                                                                                                                                                                                                                                                                                                                                                                            |                                                                                                                                                                                                                                                           |                                                                    |                                  |                                                                                                      |                 |                                                   |                                                                                                                       |                                                                                                                                                                                                                                                                                                                                   |
| EPI_ISL_1035248, EPI_ISL_1035249, EPI_ISL_1035663, EPI_ISL_1035697                                                                                                                                                                                                                                                                                                                                                                                                                                                                                                                                                                                  | Dutch COVID-19 response team                                             | National Institute for Public Health and the Environment (RIVM)                                          | Adam Meijer, Harry Vennema, Dirk Eggink, Jeroen Cremer, Sharon van den Brink, Bas van der Veer, AnneMarie van den Brandt, Florian Zwagemaker, Dennis Schmitz, Chantal Reusken, on behalf of the national COVID-19 response team                                                                                                                                                                                                                                           |                                                                                                                                                                                                                                                           |                                                                    |                                  |                                                                                                      |                 |                                                   |                                                                                                                       |                                                                                                                                                                                                                                                                                                                                   |
| EPI_ISL_1036235, EPI_ISL_1036236                                                                                                                                                                                                                                                                                                                                                                                                                                                                                                                                                                                                                    | Center of Advanced Studies and Technology, Molecular Genetics Laboratory | Center of Advanced Studies and Technology, Molecular Genetics Laboratory                                 | Ferrante Rossella, Mandatori Domitilla, De Fabritius Simone, Damiani Verena, Anacleio Federico                                                                                                                                                                                                                                                                                                                                                                            |                                                                                                                                                                                                                                                           |                                                                    |                                  |                                                                                                      |                 |                                                   |                                                                                                                       |                                                                                                                                                                                                                                                                                                                                   |
| EPI_ISL_1036324, EPI_ISL_1036325, EPI_ISL_1036327, EPI_ISL_1036329, EPI_ISL_1036330, EPI_ISL_1036333                                                                                                                                                                                                                                                                                                                                                                                                                                                                                                                                                | Johns Hopkins Hospital Department of Pathology                           | Johns Hopkins Hospital Department of Pathology                                                           | C. Paul Morris, Chun Huai Luo, Adannaya Amadi, Matthew Schwartz, Nicholas Gallagher, Heba H. Mostafa                                                                                                                                                                                                                                                                                                                                                                      |                                                                                                                                                                                                                                                           |                                                                    |                                  |                                                                                                      |                 |                                                   |                                                                                                                       |                                                                                                                                                                                                                                                                                                                                   |
| EPI_ISL_1038791                                                                                                                                                                                                                                                                                                                                                                                                                                                                                                                                                                                                                                     | US Air Force School of Aerospace Medicine                                | US Air Force School of Aerospace Medicine                                                                | Anthony Fries, Jennifer Meyer, William Gruner, William Buggele, Amanda Javorina, Sarah Purves, Clarise Starr, Elizabeth Macias                                                                                                                                                                                                                                                                                                                                            |                                                                                                                                                                                                                                                           |                                                                    |                                  |                                                                                                      |                 |                                                   |                                                                                                                       |                                                                                                                                                                                                                                                                                                                                   |
| EPI_ISL_1038852, EPI_ISL_1038853, EPI_ISL_1038854                                                                                                                                                                                                                                                                                                                                                                                                                                                                                                                                                                                                   | Colorado Department of Public Health and Environment                     | Colorado Department of Puplic Health and Environment                                                     | Laura Bankers, Molly C. Hetherington-Rauth, Diana Ir, Shannon Ely, Shannon R. Matzinger, Sarah Elizabeth Totten, Emily A. Travanty                                                                                                                                                                                                                                                                                                                                        |                                                                                                                                                                                                                                                           |                                                                    |                                  |                                                                                                      |                 |                                                   |                                                                                                                       |                                                                                                                                                                                                                                                                                                                                   |
| EPI_ISL_1038945, EPI_ISL_1038952, EPI_ISL_1038956, EPI_ISL_1038961, EPI_ISL_1038962, EPI_ISL_1038963, EPI_ISL_1038964                                                                                                                                                                                                                                                                                                                                                                                                                                                                                                                               | New Mexico Department of Health Scientific Laboratory                    | New Mexico Department of Health Scientific Laboratory                                                    | Ellie Johnson, Anastacia Griego-Fisher, D'eldra Malone, Jennifer Benoit                                                                                                                                                                                                                                                                                                                                                                                                   |                                                                                                                                                                                                                                                           |                                                                    |                                  |                                                                                                      |                 |                                                   |                                                                                                                       |                                                                                                                                                                                                                                                                                                                                   |
| EPI_ISL_1039058, EPI_ISL_1039070, EPI_ISL_1039073, EPI_ISL_1039079, EPI_ISL_1039082, EPI_ISL_1039086, EPI_ISL_1039089, EPI_ISL_1039095, EPI_ISL_1039097, EPI_ISL_1039099, EPI_ISL_1039101, EPI_ISL_1039102, EPI_ISL_1039103, EPI_ISL_1039104, EPI_ISL_1039113, EPI_ISL_1039118, EPI_ISL_1039119, EPI_ISL_1039122, EPI_ISL_1039123                                                                                                                                                                                                                                                                                                                   | see above                                                                | Center of Hygiene and Epidemiology in Belgorod Region                                                    | WHO National Influenza Centre Russian Federation                                                                                                                                                                                                                                                                                                                                                                                                                          | Andrey Komissarov, Artem Fadeev, Lyudmila Berdinskikh, Anna Ivanova, Kseniya Komissarova, Dmitry Bazhenov, Tamila Musaeva, Maria Timofeeva, Veronika Eder, Maria Pisareva, Daria Danilenko, Ksenia Safina, Elena Nabieva, Georgii Bazykin, Dmitry Lioznov |                                                                    |                                  |                                                                                                      |                 |                                                   |                                                                                                                       |                                                                                                                                                                                                                                                                                                                                   |
| EPI_ISL_1039141                                                                                                                                                                                                                                                                                                                                                                                                                                                                                                                                                                                                                                     | Pathogenic Microorganisms Variability Laboratory                         | WHO National Influenza Centre Russian Federation                                                         | Andrey Komissarov, Artem Fadeev, Anna Ivanova, Kseniya Komissarova, Dmitry Bazhenov, Daria Danilenko, Ksenia Safina, Elena Nabieva, Georgii Bazykin, Nadezhda Kuznetsova, Elena Shidlovskaya, Sergey Alkhovsky, Tatyana Vishnevskaya, Elizaveta Divisenko, Alexey Shchetinin, Maria Nikiforova, Andrey Pochtovy, Evgeny Usachev, Elena Vokalova, Maxim Rubalsky, Oleg Rubalsky, Artem Tkachuk, Vladimir Gushchin, Alexander Gintsburg, Dmitry Lioznov                     |                                                                                                                                                                                                                                                           |                                                                    |                                  |                                                                                                      |                 |                                                   |                                                                                                                       |                                                                                                                                                                                                                                                                                                                                   |
| EPI_ISL_1040682                                                                                                                                                                                                                                                                                                                                                                                                                                                                                                                                                                                                                                     | False Bay Hospital wc FBH                                                | NHLS/UCT                                                                                                 | Arash Iranzadeh, Deelan Doolabh, Lynn Tyers, Bruna Galvao, Innocent Mudau, Marvin Hsiao, Kruger Marais, Diana Hardie, Stephen Korsman, Carolyn Williamson                                                                                                                                                                                                                                                                                                                 |                                                                                                                                                                                                                                                           |                                                                    |                                  |                                                                                                      |                 |                                                   |                                                                                                                       |                                                                                                                                                                                                                                                                                                                                   |
| EPI_ISL_1040766                                                                                                                                                                                                                                                                                                                                                                                                                                                                                                                                                                                                                                     | Mitchells Plain Hospital wc MPH                                          | NHLS/UCT                                                                                                 | Arash Iranzadeh, Deelan Doolabh, Lynn Tyers, Bruna Galvao, Innocent Mudau, Marvin Hsiao, Kruger Marais, Diana Hardie, Stephen Korsman, Carolyn Williamson                                                                                                                                                                                                                                                                                                                 |                                                                                                                                                                                                                                                           |                                                                    |                                  |                                                                                                      |                 |                                                   |                                                                                                                       |                                                                                                                                                                                                                                                                                                                                   |
| EPI_ISL_1040768                                                                                                                                                                                                                                                                                                                                                                                                                                                                                                                                                                                                                                     | Groote Schuur Hospital wc GSH                                            | NHLS/UCT                                                                                                 | Arash Iranzadeh, Deelan Doolabh, Lynn Tyers, Bruna Galvao, Innocent Mudau, Marvin Hsiao, Kruger Marais, Diana Hardie, Stephen Korsman, Carolyn Williamson                                                                                                                                                                                                                                                                                                                 |                                                                                                                                                                                                                                                           |                                                                    |                                  |                                                                                                      |                 |                                                   |                                                                                                                       |                                                                                                                                                                                                                                                                                                                                   |
| EPI_ISL_1040769, EPI_ISL_1040770, EPI_ISL_1040771, EPI_ISL_1040772, EPI_ISL_1040773                                                                                                                                                                                                                                                                                                                                                                                                                                                                                                                                                                 | 2 Military Hospital wc MAA                                               | NHLS/UCT                                                                                                 | Arash Iranzadeh, Deelan Doolabh, Lynn Tyers, Bruna Galvao, Innocent Mudau, Marvin Hsiao, Kruger Marais, Diana Hardie, Stephen Korsman, Carolyn Williamson                                                                                                                                                                                                                                                                                                                 |                                                                                                                                                                                                                                                           |                                                                    |                                  |                                                                                                      |                 |                                                   |                                                                                                                       |                                                                                                                                                                                                                                                                                                                                   |
| EPI_ISL_1040774                                                                                                                                                                                                                                                                                                                                                                                                                                                                                                                                                                                                                                     | Victoria Hospital wc VHW                                                 | NHLS/UCT                                                                                                 | Arash Iranzadeh, Deelan Doolabh, Lynn Tyers, Bruna Galvao, Innocent Mudau, Marvin Hsiao, Kruger Marais, Diana Hardie, Stephen Korsman, Carolyn Williamson                                                                                                                                                                                                                                                                                                                 |                                                                                                                                                                                                                                                           |                                                                    |                                  |                                                                                                      |                 |                                                   |                                                                                                                       |                                                                                                                                                                                                                                                                                                                                   |
| EPI_ISL_1040775                                                                                                                                                                                                                                                                                                                                                                                                                                                                                                                                                                                                                                     | False Bay Hospital wc FBH                                                | NHLS/UCT                                                                                                 | Arash Iranzadeh, Deelan Doolabh, Lynn Tyers, Bruna Galvao, Innocent Mudau, Marvin Hsiao, Kruger Marais, Diana Hardie, Stephen Korsman, Carolyn Williamson                                                                                                                                                                                                                                                                                                                 |                                                                                                                                                                                                                                                           |                                                                    |                                  |                                                                                                      |                 |                                                   |                                                                                                                       |                                                                                                                                                                                                                                                                                                                                   |
| EPI_ISL_1048608, EPI_ISL_1048614, EPI_ISL_1048619, EPI_ISL_1048620, EPI_ISL_1048628, EPI_ISL_1048629, EPI_ISL_1048631, EPI_ISL_1048632, EPI_ISL_1048633, EPI_ISL_1048634, EPI_ISL_1048644, EPI_ISL_1048645, EPI_ISL_1048646, EPI_ISL_1048647, EPI_ISL_1048648, EPI_ISL_1048649, EPI_ISL_1048650, EPI_ISL_1048651                                                                                                                                                                                                                                                                                                                                    | see above                                                                | Maine HETL                                                                                               | Tewhey Lab, The Jackson Laboratory                                                                                                                                                                                                                                                                                                                                                                                                                                        | Matluk,N., Dewey,H., Iosue,F., Barter,M., Lynch,R., Munger,H. and Tewhey,R.                                                                                                                                                                               |                                                                    |                                  |                                                                                                      |                 |                                                   |                                                                                                                       |                                                                                                                                                                                                                                                                                                                                   |
| EPI_ISL_1049337                                                                                                                                                                                                                                                                                                                                                                                                                                                                                                                                                                                                                                     | Innovative Genomics Institute, UC Berkeley                               | Innovative Genomics Institute, UC Berkeley                                                               | Stacia Wyman, Alison Ciling, Netravathi Krishnappa, Haridha Shivram, Phil Frankino, Liana Lareaou                                                                                                                                                                                                                                                                                                                                                                         |                                                                                                                                                                                                                                                           |                                                                    |                                  |                                                                                                      |                 |                                                   |                                                                                                                       |                                                                                                                                                                                                                                                                                                                                   |
| EPI_ISL_1049517                                                                                                                                                                                                                                                                                                                                                                                                                                                                                                                                                                                                                                     | Seattle Flu Study                                                        | Seattle Flu Study                                                                                        | Deborah A. Nickerson, Chris D. Frazar, Jover Lee, Benjamin Pelle, Erica Ryke, Matthew Richardson, Amanda Adler, Elisabeth Brandstetter, Peter D. Han, Kairsten Fay, Misja Ilcisin, Kirsten Lacombe, Thomas R. Sibley, Melissa Truong, Caitlin R. Wolf, Karen Cowgill, Stephanie Schrag, Jeff Duchin, Michael Boeckh, Janet A. Englund, Michael Famulare, Barry R. Lutz, Mark J. Rieder, Lea M. Starita, Matthew Thompson, Helen Y. Chu, Trevor Bedford, Jay Shendure      |                                                                                                                                                                                                                                                           |                                                                    |                                  |                                                                                                      |                 |                                                   |                                                                                                                       |                                                                                                                                                                                                                                                                                                                                   |
| EPI_ISL_1055114, EPI_ISL_1055135, EPI_ISL_1055136, EPI_ISL_1055142, EPI_ISL_1055145                                                                                                                                                                                                                                                                                                                                                                                                                                                                                                                                                                 | National Virus Reference Laboratory                                      | National Virus Reference Laboratory                                                                      | Guerrino Macori, Gabriel Gonzalez, Michael Carr, Zoe Yandle, Jonathan Dean, Seamus Fanning, Cililian F De Gascun                                                                                                                                                                                                                                                                                                                                                          |                                                                                                                                                                                                                                                           |                                                                    |                                  |                                                                                                      |                 |                                                   |                                                                                                                       |                                                                                                                                                                                                                                                                                                                                   |
| EPI_ISL_1055417, EPI_ISL_1055419, EPI_ISL_1055420, EPI_ISL_1055421, EPI_ISL_1055422, EPI_ISL_1055423, EPI_ISL_1055424, EPI_ISL_1055426                                                                                                                                                                                                                                                                                                                                                                                                                                                                                                              | Dr. Leonard A. Miller Centre for Health Services                         | National Microbiology Laboratory (NML)                                                                   | Anna Majer, Shari Tyson, Grace Seo, Philip Mabon, Elsie Grudeski, Rhannon Huzarewicz, Russell Mandes, Anneliese Landgraff, Jennifer Tanner, Natalie Knox, Morag Graham, Gary Van Domselaar, Robert Needle, Yang Yu, Adel Malek, Laura Gilbert, George Zahariadis, Nathalie Bastien, Yan Li, Timothy Booth, Darian Hole, Madison Chapel, Kirsten Biggar, Kerri Smith, CanCOGeN's metadata curation team, Public Health Agency of Canada CanCOGeN team                      |                                                                                                                                                                                                                                                           |                                                                    |                                  |                                                                                                      |                 |                                                   |                                                                                                                       |                                                                                                                                                                                                                                                                                                                                   |
| EPI_ISL_1055579, EPI_ISL_1055612, EPI_ISL_1055623, EPI_ISL_1055630                                                                                                                                                                                                                                                                                                                                                                                                                                                                                                                                                                                  | QEII Health Sciences Centre                                              | National Microbiology Laboratory (NML)                                                                   | Anna Majer, Shari Tyson, Grace Seo, Philip Mabon, Elsie Grudeski, Rhannon Huzarewicz, Russell Mandes, Anneliese Landgraff, Jennifer Tanner, Natalie Knox, Morag Graham, Gary Van Domselaar, Todd Hatchette, Jason LeBlanc, Janice Pettipas, Dan Gaston, Nathalie Bastien, Yan Li, Timothy Booth, Darian Hole, Madison Chapel, Kirsten Biggar, CanCOGeN's metadata curation team, Public Health Agency of Canada CanCOGeN team                                             |                                                                                                                                                                                                                                                           |                                                                    |                                  |                                                                                                      |                 |                                                   |                                                                                                                       |                                                                                                                                                                                                                                                                                                                                   |
| EPI_ISL_1059902                                                                                                                                                                                                                                                                                                                                                                                                                                                                                                                                                                                                                                     | DNA Laboratories Sdn. Bhd.                                               | Malaysia Genome Institute                                                                                | Mohd Noor Mat Isa, Irni Suhayu Sapian, Yusuf Muhammad Noor, Nurhezreen Md Iqbal, Mohd Faizal Abu Bakar, Enizza Kasim, Shamsidar Sopie, Siti Noraini Othman, Azrin Ahmad, Wong Yong Wee, Nor Azfa Johari.                                                                                                                                                                                                                                                                  |                                                                                                                                                                                                                                                           |                                                                    |                                  |                                                                                                      |                 |                                                   |                                                                                                                       |                                                                                                                                                                                                                                                                                                                                   |
| EPI_ISL_1060509, EPI_ISL_1060510                                                                                                                                                                                                                                                                                                                                                                                                                                                                                                                                                                                                                    | Servicio de Microbiología. Hospital Clínico Universitario de Valencia    | SeqCOVID-SPAIN consortium/IBV(CSIC)                                                                      | David Navarro Ortega, Eliseo Albert Vicent, Ignacio Torres and SeqCOVID-SPAIN consortium                                                                                                                                                                                                                                                                                                                                                                                  |                                                                                                                                                                                                                                                           |                                                                    |                                  |                                                                                                      |                 |                                                   |                                                                                                                       |                                                                                                                                                                                                                                                                                                                                   |
| EPI_ISL_1060871                                                                                                                                                                                                                                                                                                                                                                                                                                                                                                                                                                                                                                     | Providence Oregon Regional Laboratories                                  | Providence St. Joseph Health Molecular Genomics Laboratory                                               | Alexa K Dowdell, Brian D Piening, Fred L Robinson, Carlo B Bifulco, Mary Campbell                                                                                                                                                                                                                                                                                                                                                                                         |                                                                                                                                                                                                                                                           |                                                                    |                                  |                                                                                                      |                 |                                                   |                                                                                                                       |                                                                                                                                                                                                                                                                                                                                   |

|                                                                                                                                                                                                                                                                                                                                                                                                                                                                                                                                                                                                                                                                                                                                                                                                                                                                                                                    |                                                                                                                                                   |                                                                                                                                                   |                                                                                                                                                                                                                                                                                                                                         |
|--------------------------------------------------------------------------------------------------------------------------------------------------------------------------------------------------------------------------------------------------------------------------------------------------------------------------------------------------------------------------------------------------------------------------------------------------------------------------------------------------------------------------------------------------------------------------------------------------------------------------------------------------------------------------------------------------------------------------------------------------------------------------------------------------------------------------------------------------------------------------------------------------------------------|---------------------------------------------------------------------------------------------------------------------------------------------------|---------------------------------------------------------------------------------------------------------------------------------------------------|-----------------------------------------------------------------------------------------------------------------------------------------------------------------------------------------------------------------------------------------------------------------------------------------------------------------------------------------|
| EPI_ISL_1061405                                                                                                                                                                                                                                                                                                                                                                                                                                                                                                                                                                                                                                                                                                                                                                                                                                                                                                    | Queen Elizabeth Hospital                                                                                                                          | Hong Kong Children's Hospital                                                                                                                     | Herman Tse, Garnet Kwan-Yue Choi, Sally Cheuk-Ying Wong, David Christopher Lung                                                                                                                                                                                                                                                         |
| EPI_ISL_1061408                                                                                                                                                                                                                                                                                                                                                                                                                                                                                                                                                                                                                                                                                                                                                                                                                                                                                                    | Kwong Wah Hospital                                                                                                                                | Hong Kong Children's Hospital                                                                                                                     | Herman Tse, Garnet Kwan-Yue Choi, Sally Cheuk-Ying Wong, David Christopher Lung                                                                                                                                                                                                                                                         |
| EPI_ISL_1061409, EPI_ISL_1061410, EPI_ISL_1061411                                                                                                                                                                                                                                                                                                                                                                                                                                                                                                                                                                                                                                                                                                                                                                                                                                                                  | Queen Elizabeth Hospital                                                                                                                          | Hong Kong Children's Hospital                                                                                                                     | Herman Tse, Garnet Kwan-Yue Choi, Sally Cheuk-Ying Wong, David Christopher Lung                                                                                                                                                                                                                                                         |
| EPI_ISL_1063636, EPI_ISL_1063637, EPI_ISL_1063638, EPI_ISL_1063678, EPI_ISL_1063688                                                                                                                                                                                                                                                                                                                                                                                                                                                                                                                                                                                                                                                                                                                                                                                                                                | Division of Emerging Infectious Diseases, Bureau of Infectious Diseases Diagnosis Control, Korea Disease Control and Prevention Agency            | Division of Emerging Infectious Diseases, Bureau of Infectious Diseases Diagnosis Control, Korea Disease Control and Prevention Agency            | Ae Kyung Park, Il-Hwan Kim, Heui Man Kim, Jeong-Min Kim, Namjoo Lee, Chaeyoung Lee, Sang Hee Woo, Eun-Jin Kim                                                                                                                                                                                                                           |
| EPI_ISL_1063808, EPI_ISL_1063862, EPI_ISL_1063864, EPI_ISL_1063866, EPI_ISL_1063867, EPI_ISL_1063868, EPI_ISL_1063869, EPI_ISL_1063870, EPI_ISL_1063871, EPI_ISL_1063872, EPI_ISL_1063873, EPI_ISL_1063874, EPI_ISL_1063875, EPI_ISL_1063876, EPI_ISL_1063878, EPI_ISL_1063879, EPI_ISL_1063880, EPI_ISL_1063881, EPI_ISL_1063882, EPI_ISL_1063885, EPI_ISL_1063886, EPI_ISL_1063887, EPI_ISL_1063888, EPI_ISL_1063889, EPI_ISL_1063890, EPI_ISL_1063893, EPI_ISL_1063894, EPI_ISL_1063895                                                                                                                                                                                                                                                                                                                                                                                                                         |                                                                                                                                                   |                                                                                                                                                   |                                                                                                                                                                                                                                                                                                                                         |
| see above                                                                                                                                                                                                                                                                                                                                                                                                                                                                                                                                                                                                                                                                                                                                                                                                                                                                                                          | Immunogenomics lab, Institute of Life Sciences, Bhubaneswar                                                                                       | Immunogenomics lab, Institute of Life Sciences, Bhubaneswar                                                                                       | Sunil K. Raghav, Safal Walia, Arup Ghosh, Atimukta Jha, Amol M. Kanampalliwar, Shifu Aggarwal, Kirtal Hansdah, Rupesh Dash, Rajeeb Swain, Punit Prasad, INSACOG Consortium, Ajay Parida                                                                                                                                                 |
| EPI_ISL_1064694                                                                                                                                                                                                                                                                                                                                                                                                                                                                                                                                                                                                                                                                                                                                                                                                                                                                                                    | A05                                                                                                                                               | The Public Health Agency of Sweden                                                                                                                | Oskar Karlsson Lindsjo, Maria Lind Karlberg, Carlo Berg, Anna-Malin Linde, Sofia Stamouli, Samuel Ohman, Reza Advani, Mattias Haukland, Petra Holmstrom, Noura Walai, Petra Edquist, Mia Brytting, Anna Risberg, Karin Tegmark-Wisell                                                                                                   |
| EPI_ISL_1065103, EPI_ISL_1065275, EPI_ISL_1065294, EPI_ISL_1065312, EPI_ISL_1065370, EPI_ISL_1065437, EPI_ISL_1065587, EPI_ISL_1065603, EPI_ISL_1065614, EPI_ISL_1065662, EPI_ISL_1065764, EPI_ISL_1065886, EPI_ISL_1065939, EPI_ISL_1066147, EPI_ISL_1066181, EPI_ISL_1066231, EPI_ISL_1066241, EPI_ISL_1066255, EPI_ISL_1066303, EPI_ISL_1066427, EPI_ISL_1066450, EPI_ISL_1066560, EPI_ISL_1066577, EPI_ISL_1066678, EPI_ISL_1066715, EPI_ISL_1066882, EPI_ISL_1066933, EPI_ISL_1067182, EPI_ISL_1067191, EPI_ISL_1067215, EPI_ISL_1067288, EPI_ISL_1067293, EPI_ISL_1067364, EPI_ISL_1067409, EPI_ISL_1067414, EPI_ISL_1067433, EPI_ISL_1067448, EPI_ISL_1067487, EPI_ISL_1067489, EPI_ISL_1067504, EPI_ISL_1067524, EPI_ISL_1067535                                                                                                                                                                           |                                                                                                                                                   |                                                                                                                                                   |                                                                                                                                                                                                                                                                                                                                         |
| see above                                                                                                                                                                                                                                                                                                                                                                                                                                                                                                                                                                                                                                                                                                                                                                                                                                                                                                          | Department of Virus and Microbiological Special Diagnostics, Statens Serum Institut, Copenhagen, Denmark                                          | Aalborg University                                                                                                                                | Danish Covid-19 Genome Consortium                                                                                                                                                                                                                                                                                                       |
| EPI_ISL_1067917, EPI_ISL_1067918, EPI_ISL_1067919, EPI_ISL_1067920, EPI_ISL_1067922, EPI_ISL_1067926, EPI_ISL_1067932, EPI_ISL_1067933, EPI_ISL_1067934, EPI_ISL_1067935, EPI_ISL_1067936, EPI_ISL_1067937, EPI_ISL_1067939, EPI_ISL_1067940, EPI_ISL_1067941, EPI_ISL_1067942                                                                                                                                                                                                                                                                                                                                                                                                                                                                                                                                                                                                                                     |                                                                                                                                                   |                                                                                                                                                   |                                                                                                                                                                                                                                                                                                                                         |
| see above                                                                                                                                                                                                                                                                                                                                                                                                                                                                                                                                                                                                                                                                                                                                                                                                                                                                                                          | Wisconsin State Laboratory of Hygiene Communicable Disease Division                                                                               | Wisconsin State Laboratory of Hygiene Communicable Disease Division                                                                               | Kelsey R. Florek, Abigail C. Shockey                                                                                                                                                                                                                                                                                                    |
| EPI_ISL_1068105, EPI_ISL_1068106, EPI_ISL_1068126, EPI_ISL_1068127, EPI_ISL_1068128, EPI_ISL_1068129, EPI_ISL_1068130, EPI_ISL_1068131, EPI_ISL_1068132, EPI_ISL_1068133, EPI_ISL_1068134, EPI_ISL_1068135, EPI_ISL_1068136, EPI_ISL_1068137, EPI_ISL_1068138, EPI_ISL_1068139, EPI_ISL_1068140, EPI_ISL_1068141                                                                                                                                                                                                                                                                                                                                                                                                                                                                                                                                                                                                   |                                                                                                                                                   |                                                                                                                                                   |                                                                                                                                                                                                                                                                                                                                         |
| see above                                                                                                                                                                                                                                                                                                                                                                                                                                                                                                                                                                                                                                                                                                                                                                                                                                                                                                          | Laboratorio de Ecologia de Doencas Transmissíveis na Amazonia, Instituto Leonidas e Maria Deane - Fiocruz Amazonia                                | Laboratorio de Ecologia de Doencas Transmissíveis na Amazonia, Instituto Leonidas e Maria Deane - Fiocruz Amazonia                                | Valdinete Nascimento, Victor Souza, André Corado, Fernanda Nascimento, George Silva, Ágatha Costa, Debora Duarte, Karina Pessoa, Matilde Mejia, Luciana Gonçalves, Maria Júlia Brandão, Michele Jesus, Felipe Naveca on behalf of the Fiocruz COVID-19 Genomic Surveillance Network                                                     |
| EPI_ISL_1068351, EPI_ISL_1068358, EPI_ISL_1068360, EPI_ISL_1068361                                                                                                                                                                                                                                                                                                                                                                                                                                                                                                                                                                                                                                                                                                                                                                                                                                                 | Central Public Health Laboratory - LACEN -Bahia, Salvador, Brazil                                                                                 | Central Public Health Laboratory - LACEN -Bahia, Salvador, Brazil                                                                                 | Stephane Tosta, Luciana Oliveira, Vanessa Nardy, Patrícia Cajado, Marcela Gómez, Breno Dominguez, Jaqueline Gomes, Vagner Fonseca, Marta Giovanetti, Luiz Alcantara, Felicidade Pereira, Arabela Leal                                                                                                                                   |
| EPI_ISL_1073815, EPI_ISL_1073816                                                                                                                                                                                                                                                                                                                                                                                                                                                                                                                                                                                                                                                                                                                                                                                                                                                                                   | Kansas Health and Environmental Lab                                                                                                               | Kansas Health and Environmental Lab                                                                                                               | Mike Grose, Carissa Robertson, Ben Olsen, and Phil Adam                                                                                                                                                                                                                                                                                 |
| EPI_ISL_1076566, EPI_ISL_1076567, EPI_ISL_1076569                                                                                                                                                                                                                                                                                                                                                                                                                                                                                                                                                                                                                                                                                                                                                                                                                                                                  | Houston Methodist Hospital                                                                                                                        | Houston Methodist Hospital                                                                                                                        | S. Wesley Long, Randall J. Olsen, Paul A. Christensen, Sishir Subedi, Robert Olson, James J. Davis, Matthew Ojeda Saavedra, Prasanti Yerramilli, Layne Pruitt, Kristina Reppond, Madison N. Shyer, Jessica Cambric, Ilya J. Finkelstein, Jimmy Gollihar, and James M. Musser                                                            |
| EPI_ISL_1081959                                                                                                                                                                                                                                                                                                                                                                                                                                                                                                                                                                                                                                                                                                                                                                                                                                                                                                    | "Stefan S. Nicolau" Institute of Virology                                                                                                         | "Stefan S. Nicolau" Institute of Virology                                                                                                         | Anca Botezatu, Iulia Virginia Iancu, Coralia Bleotu, Mihaela Economescu, Laura Necula, Denisa Dragu, Lilia Matei, Ioana Pitica, Marinela Bostan, Mirela Mihailea, Laura Grecu, Camelia Sultana, Simona Ruta, Ana Iulia Neagu, Adriana Plesa, Saviana Nedeianu, Alina Nastasie, Cristina Mambet, Gabriela Anton, Carmen Cristina Diaconu |
| EPI_ISL_1085013                                                                                                                                                                                                                                                                                                                                                                                                                                                                                                                                                                                                                                                                                                                                                                                                                                                                                                    | Laboratorio Biologia Molecolare Sars Cov2 - UOC Laboratorio Analisi - Servizio Medicina di Laboratorio, Ospedale "San Francesco" - ATS-ASSL Nuoro | Laboratorio Biologia Molecolare Sars Cov2 - UOC Laboratorio Analisi - Servizio Medicina di Laboratorio, Ospedale "San Francesco" - ATS-ASSL Nuoro | Piras Giovanna, Asproni Rosanna, Monne Maria Itria, Fiamma Maura, , Palmas Angelo Domenico, Lo Maglio Iana, Mameli Giuseppe                                                                                                                                                                                                             |
| EPI_ISL_1085675                                                                                                                                                                                                                                                                                                                                                                                                                                                                                                                                                                                                                                                                                                                                                                                                                                                                                                    | Hôpital Henri Mondor                                                                                                                              | Department of Virology, Henri Mondor University Hospital, Assistance Publique Hôpitaux de Paris, Université Paris-Est Créteil, INSERM U955        | Christophe Rodriguez, Slim Fourati, Vanessa Demontant, Guillaume Gricourt, Melissa N'Debi, Alexandre Soulier, Elisabeth Trawinski, Jean-Michel Pawlotsky                                                                                                                                                                                |
| EPI_ISL_1092247, EPI_ISL_1092316                                                                                                                                                                                                                                                                                                                                                                                                                                                                                                                                                                                                                                                                                                                                                                                                                                                                                   | Protzer Lab                                                                                                                                       | Protzer Lab, Laboratory for Functional Genome Analysis, Dept. Genomics, Gene Center of the LMU Munich                                             | Ulrike Protzer, Dieter Hoffmann, Till Bunse, Eva C.Schulte, Elisabeth Esser, Stefan Krebs, Alexander Graf, Helmut Blum                                                                                                                                                                                                                  |
| EPI_ISL_1094648, EPI_ISL_1094651, EPI_ISL_1094652                                                                                                                                                                                                                                                                                                                                                                                                                                                                                                                                                                                                                                                                                                                                                                                                                                                                  | KS Health and Environmental Laboratories                                                                                                          | Respiratory Viruses Branch, Division of Viral Diseases, Centers for Disease Control and Prevention                                                | Krista Queen, Yan Li, Ying Tao, Jing Zhang, Anna Uehara, Anna Montmayeur, Clinton R. Paden, Peter W. Cook, Rachel Marine, Mili Sheth, Jasmine Padilla, Sarah Nobles, Mark Burroughs, Lori Rowe, Haibin Wang, Ben L. Rambo-Martin, Dhvani Batra, Justin Lee, Suixiang Tong                                                               |
| EPI_ISL_1095516                                                                                                                                                                                                                                                                                                                                                                                                                                                                                                                                                                                                                                                                                                                                                                                                                                                                                                    | Instituto Nacional de Medicina Genomica                                                                                                           | Instituto Nacional de Medicina Genomica                                                                                                           | Hidalgo-Miranda A, Mendoza-Vargas A, Reyes-Grajeda JP, Cedro-Tanda A, Alcaraz N, Gonzalez-Barrera D, Rangel-DeLeon D, Ramirez-Vega O, Sifuentes-Rojas C, Cisneros-Villanueva M, Herrera-Montalvo LA                                                                                                                                     |
| EPI_ISL_1098647                                                                                                                                                                                                                                                                                                                                                                                                                                                                                                                                                                                                                                                                                                                                                                                                                                                                                                    | South Eastern Area Laboratory Services (SEALS)                                                                                                    | NSW Health Pathology - Institute of Clinical Pathology and Medical Research; Westmead Hospital; University of Sydney                              | CIDM-PH et al.                                                                                                                                                                                                                                                                                                                          |
| EPI_ISL_1098691, EPI_ISL_1098692, EPI_ISL_1098693, EPI_ISL_1098694, EPI_ISL_1098695, EPI_ISL_1098696, EPI_ISL_1098708, EPI_ISL_1098709, EPI_ISL_1098710, EPI_ISL_1098711, EPI_ISL_1098712, EPI_ISL_1098713, EPI_ISL_1098714, EPI_ISL_1098715, EPI_ISL_1098716, EPI_ISL_1098717, EPI_ISL_1098718, EPI_ISL_1098719, EPI_ISL_1098720, EPI_ISL_1098721, EPI_ISL_1098722, EPI_ISL_1098723, EPI_ISL_1098724, EPI_ISL_1098725, EPI_ISL_1098726, EPI_ISL_1098727, EPI_ISL_1098728, EPI_ISL_1098729, EPI_ISL_1098730, EPI_ISL_1098731, EPI_ISL_1098732, EPI_ISL_1098733, EPI_ISL_1098734, EPI_ISL_1098735, EPI_ISL_1098736, EPI_ISL_1098737, EPI_ISL_1098738, EPI_ISL_1098739, EPI_ISL_1098740, EPI_ISL_1098741, EPI_ISL_1098742, EPI_ISL_1098743, EPI_ISL_1098744, EPI_ISL_1098745, EPI_ISL_1098746, EPI_ISL_1098747, EPI_ISL_1098748, EPI_ISL_1098749, EPI_ISL_1098750, EPI_ISL_1098751, EPI_ISL_1098752, EPI_ISL_1098753 |                                                                                                                                                   |                                                                                                                                                   |                                                                                                                                                                                                                                                                                                                                         |
| see above                                                                                                                                                                                                                                                                                                                                                                                                                                                                                                                                                                                                                                                                                                                                                                                                                                                                                                          | Fukuoka Institute of Health and Environmental Sciences                                                                                            | Fukuoka Institute of Health and Environmental Sciences                                                                                            | Asako Nakamura, Yoshiki Etoh, Hiroaki Shigemura, Akira Ohishi, Takayuki Kobayashi, Saori Ueda, Chiharu Katamune, Mitsuhiro Hamasaki, Yuki Ashizuka, Tsuyoshi Sekizuka, Kentaro Itokawa, Rina Tanaka, Masanori Hashino, Makoto Kuroda                                                                                                    |
| EPI_ISL_1104842, EPI_ISL_1104854, EPI_ISL_1104868, EPI_ISL_1104869, EPI_ISL_1104878, EPI_ISL_1104883, EPI_ISL_1104895, EPI_ISL_1104896, EPI_ISL_1104897, EPI_ISL_1104905, EPI_ISL_1104914, EPI_ISL_1104923, EPI_ISL_1104929, EPI_ISL_1104935, EPI_ISL_1104941, EPI_ISL_1104947, EPI_ISL_1104968                                                                                                                                                                                                                                                                                                                                                                                                                                                                                                                                                                                                                    |                                                                                                                                                   |                                                                                                                                                   |                                                                                                                                                                                                                                                                                                                                         |
| see above                                                                                                                                                                                                                                                                                                                                                                                                                                                                                                                                                                                                                                                                                                                                                                                                                                                                                                          | University College London Hospital                                                                                                                | COVID-19 Genomics UK (COG-UK) Consortium                                                                                                          | Judith Heaney, Matthew Byott, Catherine Houlihan, Dan Frampton, Stuart Kirk, Moira Spyer and Eleni Nastouli                                                                                                                                                                                                                             |
| EPI_ISL_1109484, EPI_ISL_1109485                                                                                                                                                                                                                                                                                                                                                                                                                                                                                                                                                                                                                                                                                                                                                                                                                                                                                   | Medical Ain Shams Research Institute (MASRI), Ain Shams University                                                                                | Medical Ain Shams Research Institute (MASRI), Ain Shams University                                                                                | Hesham Elghazaly, Sara Hassan Agwa, Hala Hafez , Fatma Ebied, Manal Hamdy Elsaid, Mohamed Elhadidi, Aya Mohamed , Shimaa Moustafa, Reham Kassab, Iman Foda , Samia Abdou Girgis, Hoda Ezz Elarab, Hagar Elshora, Osama Mansour.                                                                                                         |
| EPI_ISL_1109980, EPI_ISL_1110009                                                                                                                                                                                                                                                                                                                                                                                                                                                                                                                                                                                                                                                                                                                                                                                                                                                                                   | MEPHI, Aix Marseille University                                                                                                                   | MEPHI, Aix Marseille University                                                                                                                   | Anthony LEVASSEUR                                                                                                                                                                                                                                                                                                                       |
| EPI_ISL_1110560, EPI_ISL_1110562, EPI_ISL_1110565, EPI_ISL_1110566, EPI_ISL_1110567, EPI_ISL_1110569, EPI_ISL_1110570, EPI_ISL_1110571, EPI_ISL_1110572, EPI_ISL_1110573, EPI_ISL_1110574, EPI_ISL_1110575, EPI_ISL_1110577, EPI_ISL_1110578, EPI_ISL_1110579                                                                                                                                                                                                                                                                                                                                                                                                                                                                                                                                                                                                                                                      |                                                                                                                                                   |                                                                                                                                                   |                                                                                                                                                                                                                                                                                                                                         |
| see above                                                                                                                                                                                                                                                                                                                                                                                                                                                                                                                                                                                                                                                                                                                                                                                                                                                                                                          | Kansas Health and Environmental Lab                                                                                                               | Kansas Health and Environmental Lab                                                                                                               | Mike Grose, Carissa Robertson, Ben Olsen, and Phil Adam                                                                                                                                                                                                                                                                                 |
| EPI_ISL_1111309, EPI_ISL_1111312                                                                                                                                                                                                                                                                                                                                                                                                                                                                                                                                                                                                                                                                                                                                                                                                                                                                                   | Laboratorio de Referencia Nacional de Virus Respiratorio. Instituto Nacional de Salud Perú                                                        | Laboratorio de Referencia Nacional de Enteropatógenos. Instituto Nacional de Salud del Perú                                                       | Ronnie Gavilan Chavez, Junior Caro Castro, Willi Quino Sifuentes, Veronica Hurtado Vela, Iris Silva Molina, Fiorella Orellana Peralta                                                                                                                                                                                                   |
| EPI_ISL_1111594, EPI_ISL_1111595                                                                                                                                                                                                                                                                                                                                                                                                                                                                                                                                                                                                                                                                                                                                                                                                                                                                                   | Virginia Division of Consolidated Laboratory Services                                                                                             | Virginia Division of Consolidated Laboratory Services                                                                                             | Virginia DCLS                                                                                                                                                                                                                                                                                                                           |
| EPI_ISL_1113719, EPI_ISL_1113722, EPI_ISL_1113724, EPI_ISL_1113725, EPI_ISL_1113726, EPI_ISL_1113730, EPI_ISL_1113734, EPI_ISL_1113735, EPI_ISL_1113739, EPI_ISL_1113742, EPI_ISL_1113743, EPI_ISL_1113748, EPI_ISL_1113749, EPI_ISL_1113753                                                                                                                                                                                                                                                                                                                                                                                                                                                                                                                                                                                                                                                                       |                                                                                                                                                   |                                                                                                                                                   |                                                                                                                                                                                                                                                                                                                                         |
| see above                                                                                                                                                                                                                                                                                                                                                                                                                                                                                                                                                                                                                                                                                                                                                                                                                                                                                                          | New Mexico Department of Health Scientific Laboratory                                                                                             | New Mexico Department of Health Scientific Laboratory                                                                                             | Ellie Johnson, Anastacia Griego-Fisher, D'eldra Malone, Jennifer Benoit                                                                                                                                                                                                                                                                 |
| EPI_ISL_1114726                                                                                                                                                                                                                                                                                                                                                                                                                                                                                                                                                                                                                                                                                                                                                                                                                                                                                                    | Institute for Medical Research, Infectious Disease Research Centre, National Institutes of Health, Ministry of Health Malaysia                    | Institute for Medical Research, Infectious Disease Research Centre, National Institutes of Health, Ministry of Health Malaysia                    | Suppiah J, Kamel K, Azizan MA, Thayan R                                                                                                                                                                                                                                                                                                 |
| EPI_ISL_1117451                                                                                                                                                                                                                                                                                                                                                                                                                                                                                                                                                                                                                                                                                                                                                                                                                                                                                                    | RS PMI, Bogor, West Java                                                                                                                          | Biosafety Level-3 Laboratory, Indonesian Institute of Sciences                                                                                    | Anik Budhi Dharmayanthi, Ade Andriani, Hariyatun, Asep M. Ridwanuloh, Syam Budi Iryanto, Eko Wahyu Putro, Gita Syahputra, Susanti, Inswasti Cahyani,                                                                                                                                                                                    |

[illegible]

[illegible]

|                                                                                                                                                                                                                                                                                                                                                                                                                                                                                                                                                                                                                                                                                                                                                                                                                                                                                                                                                                                                                                                                                                                                                                                                                                                                                                                                                                                                                                                                                                                                                                                                                                                                                                                                                                                                                                                                                                                                                                                                                                                                                                                                                                                                                                                                                                                                                                                                                                                                                                                                                                                                                                                                                                                                                                                                                                                                                   |             |                                                              |                                                                                                                                                                                                                                                                                                                                                                                                                                                                          |
|-----------------------------------------------------------------------------------------------------------------------------------------------------------------------------------------------------------------------------------------------------------------------------------------------------------------------------------------------------------------------------------------------------------------------------------------------------------------------------------------------------------------------------------------------------------------------------------------------------------------------------------------------------------------------------------------------------------------------------------------------------------------------------------------------------------------------------------------------------------------------------------------------------------------------------------------------------------------------------------------------------------------------------------------------------------------------------------------------------------------------------------------------------------------------------------------------------------------------------------------------------------------------------------------------------------------------------------------------------------------------------------------------------------------------------------------------------------------------------------------------------------------------------------------------------------------------------------------------------------------------------------------------------------------------------------------------------------------------------------------------------------------------------------------------------------------------------------------------------------------------------------------------------------------------------------------------------------------------------------------------------------------------------------------------------------------------------------------------------------------------------------------------------------------------------------------------------------------------------------------------------------------------------------------------------------------------------------------------------------------------------------------------------------------------------------------------------------------------------------------------------------------------------------------------------------------------------------------------------------------------------------------------------------------------------------------------------------------------------------------------------------------------------------------------------------------------------------------------------------------------------------|-------------|--------------------------------------------------------------|--------------------------------------------------------------------------------------------------------------------------------------------------------------------------------------------------------------------------------------------------------------------------------------------------------------------------------------------------------------------------------------------------------------------------------------------------------------------------|
| EPI_ISL_1119568                                                                                                                                                                                                                                                                                                                                                                                                                                                                                                                                                                                                                                                                                                                                                                                                                                                                                                                                                                                                                                                                                                                                                                                                                                                                                                                                                                                                                                                                                                                                                                                                                                                                                                                                                                                                                                                                                                                                                                                                                                                                                                                                                                                                                                                                                                                                                                                                                                                                                                                                                                                                                                                                                                                                                                                                                                                                   | Viollier AG | Department of Biosystems Science and Engineering, ETH Zürich | Chaoran Chen, Sarah Nadeau, Catharine Aquino, Ivan Topolsky, Philipp Jablonski, Lara Fuhrmann, David Dreifuss, Katharina Jahn, Andreia Cabral de Gouvea, Maria Domenica Moccia, Simon Grüter, Timothy Sykes, Lennart Opitz, Griffin White, Laura Neff, Doris Popovic, Andrea Patrignani, Jay Tracy, Ralph Schlapbach, Christiane Beckmann, Maurice Redondo, Olivier Kobel, Christoph Noppen, Sophie Seidel, Noemie Santamaria de Souza, Niko Beerenwinkel, Tanja Stadler |
| EPI_ISL_1119571                                                                                                                                                                                                                                                                                                                                                                                                                                                                                                                                                                                                                                                                                                                                                                                                                                                                                                                                                                                                                                                                                                                                                                                                                                                                                                                                                                                                                                                                                                                                                                                                                                                                                                                                                                                                                                                                                                                                                                                                                                                                                                                                                                                                                                                                                                                                                                                                                                                                                                                                                                                                                                                                                                                                                                                                                                                                   | Viollier AG | Department of Biosystems Science and Engineering, ETH Zürich | Chaoran Chen, Sarah Nadeau, Ivan Topolsky, Emmanouil Dermitzakis, Keith Harshman, Ioannis Xenarios, Henri Pegeot, Lorenzo Cerutti, Deborah Penet, Philipp Jablonski, Lara Fuhrmann, David Dreifuss, Katharina Jahn, Christiane Beckmann, Maurice Redondo, Olivier Kobel, Christoph Noppen, Sophie Seidel, Noemie Santamaria de Souza, Niko Beerenwinkel, Tanja Stadler                                                                                                   |
| EPI_ISL_1119572, EPI_ISL_1119573, EPI_ISL_1119575, EPI_ISL_1119576, EPI_ISL_1119578, EPI_ISL_1119579, EPI_ISL_1119580, EPI_ISL_1119582, EPI_ISL_1119583, EPI_ISL_1119585, EPI_ISL_1119586, EPI_ISL_1119587, EPI_ISL_1119588, EPI_ISL_1119589, EPI_ISL_1119590, EPI_ISL_1119592, EPI_ISL_1119593, EPI_ISL_1119594, EPI_ISL_1119600, EPI_ISL_1119601, EPI_ISL_1119602, EPI_ISL_1119603, EPI_ISL_1119604, EPI_ISL_1119605, EPI_ISL_1119607, EPI_ISL_1119608, EPI_ISL_1119610, EPI_ISL_1119611, EPI_ISL_1119612, EPI_ISL_1119613, EPI_ISL_1119614, EPI_ISL_1119615, EPI_ISL_1119617, EPI_ISL_1119618, EPI_ISL_1119619, EPI_ISL_1119620, EPI_ISL_1119621, EPI_ISL_1119622, EPI_ISL_1119623, EPI_ISL_1119625, EPI_ISL_1119626, EPI_ISL_1119627, EPI_ISL_1119629, EPI_ISL_1119631, EPI_ISL_1119633, EPI_ISL_1119634, EPI_ISL_1119635, EPI_ISL_1119636, EPI_ISL_1119640, EPI_ISL_1119641, EPI_ISL_1119643, EPI_ISL_1119645, EPI_ISL_1119646, EPI_ISL_1119651, EPI_ISL_1119654, EPI_ISL_1119655, EPI_ISL_1119657, EPI_ISL_1119659, EPI_ISL_1119661, EPI_ISL_1119662, EPI_ISL_1119663, EPI_ISL_1119664, EPI_ISL_1119665, EPI_ISL_1119666, EPI_ISL_1119670, EPI_ISL_1119675, EPI_ISL_1119677, EPI_ISL_1119678, EPI_ISL_1119679, EPI_ISL_1119681, EPI_ISL_1119682, EPI_ISL_1119683, EPI_ISL_1119684, EPI_ISL_1119685, EPI_ISL_1119686, EPI_ISL_1119687, EPI_ISL_1119688, EPI_ISL_1119689, EPI_ISL_1119693, EPI_ISL_1119694, EPI_ISL_1119695, EPI_ISL_1119696, EPI_ISL_1119697, EPI_ISL_1119699, EPI_ISL_1119700, EPI_ISL_1119701, EPI_ISL_1119702, EPI_ISL_1119704, EPI_ISL_1119706, EPI_ISL_1119707, EPI_ISL_1119708, EPI_ISL_1119709, EPI_ISL_1119710, EPI_ISL_1119711, EPI_ISL_1119712, EPI_ISL_1119713, EPI_ISL_1119714, EPI_ISL_1119715, EPI_ISL_1119716, EPI_ISL_1119717, EPI_ISL_1119718, EPI_ISL_1119720, EPI_ISL_1119722, EPI_ISL_1119723, EPI_ISL_1119724, EPI_ISL_1119726, EPI_ISL_1119727, EPI_ISL_1119728, EPI_ISL_1119729, EPI_ISL_1119730, EPI_ISL_1119732, EPI_ISL_1119734, EPI_ISL_1119740, EPI_ISL_1119741, EPI_ISL_1119742, EPI_ISL_1119745, EPI_ISL_1119746, EPI_ISL_1119747, EPI_ISL_1119748, EPI_ISL_1119749, EPI_ISL_1119751, EPI_ISL_1119752, EPI_ISL_1119753, EPI_ISL_1119754, EPI_ISL_1119755, EPI_ISL_1119756, EPI_ISL_1119757, EPI_ISL_1119759, EPI_ISL_1119760, EPI_ISL_1119762, EPI_ISL_1119764, EPI_ISL_1119765, EPI_ISL_1119766, EPI_ISL_1119767, EPI_ISL_1119768, EPI_ISL_1119770, EPI_ISL_1119771, EPI_ISL_1119773, EPI_ISL_1119775, EPI_ISL_1119776, EPI_ISL_1119777, EPI_ISL_1119784, EPI_ISL_1119787, EPI_ISL_1119788, EPI_ISL_1119789, EPI_ISL_1119790, EPI_ISL_1119792, EPI_ISL_1119793, EPI_ISL_1119794, EPI_ISL_1119795, EPI_ISL_1119796, EPI_ISL_1119798, EPI_ISL_1119799, EPI_ISL_1119800, EPI_ISL_1119801, EPI_ISL_1119802, EPI_ISL_1119804, EPI_ISL_1119805, EPI_ISL_1119807, EPI_ISL_1119808, EPI_ISL_1119809, EPI_ISL_1119810, EPI_ISL_1119811 |             |                                                              |                                                                                                                                                                                                                                                                                                                                                                                                                                                                          |
| see above                                                                                                                                                                                                                                                                                                                                                                                                                                                                                                                                                                                                                                                                                                                                                                                                                                                                                                                                                                                                                                                                                                                                                                                                                                                                                                                                                                                                                                                                                                                                                                                                                                                                                                                                                                                                                                                                                                                                                                                                                                                                                                                                                                                                                                                                                                                                                                                                                                                                                                                                                                                                                                                                                                                                                                                                                                                                         | Viollier AG | Department of Biosystems Science and Engineering, ETH Zürich | Chaoran Chen, Sarah Nadeau, Catharine Aquino, Ivan Topolsky, Philipp Jablonski, Lara Fuhrmann, David Dreifuss, Katharina Jahn, Andreia Cabral de Gouvea, Maria Domenica Moccia, Simon Grüter, Timothy Sykes, Lennart Opitz, Griffin White, Laura Neff, Doris Popovic, Andrea Patrignani, Jay Tracy, Ralph Schlapbach, Christiane Beckmann, Maurice Redondo, Olivier Kobel, Christoph Noppen, Sophie Seidel, Noemie Santamaria de Souza, Niko Beerenwinkel, Tanja Stadler |
| EPI_ISL_1119812                                                                                                                                                                                                                                                                                                                                                                                                                                                                                                                                                                                                                                                                                                                                                                                                                                                                                                                                                                                                                                                                                                                                                                                                                                                                                                                                                                                                                                                                                                                                                                                                                                                                                                                                                                                                                                                                                                                                                                                                                                                                                                                                                                                                                                                                                                                                                                                                                                                                                                                                                                                                                                                                                                                                                                                                                                                                   | Viollier AG | Department of Biosystems Science and Engineering, ETH Zürich | Chaoran Chen, Sarah Nadeau, Ivan Topolsky, Emmanouil Dermitzakis, Keith Harshman, Ioannis Xenarios, Henri Pegeot, Lorenzo Cerutti, Deborah Penet, Philipp Jablonski, Lara Fuhrmann, David Dreifuss, Katharina Jahn, Christiane Beckmann, Maurice Redondo, Olivier Kobel, Christoph Noppen, Sophie Seidel, Noemie Santamaria de Souza, Niko Beerenwinkel, Tanja Stadler                                                                                                   |
| EPI_ISL_1119813, EPI_ISL_1119814                                                                                                                                                                                                                                                                                                                                                                                                                                                                                                                                                                                                                                                                                                                                                                                                                                                                                                                                                                                                                                                                                                                                                                                                                                                                                                                                                                                                                                                                                                                                                                                                                                                                                                                                                                                                                                                                                                                                                                                                                                                                                                                                                                                                                                                                                                                                                                                                                                                                                                                                                                                                                                                                                                                                                                                                                                                  | Viollier AG | Department of Biosystems Science and Engineering, ETH Zürich | Chaoran Chen, Sarah Nadeau, Catharine Aquino, Ivan Topolsky, Philipp Jablonski, Lara Fuhrmann, David Dreifuss, Katharina Jahn, Andreia Cabral de Gouvea, Maria Domenica Moccia, Simon Grüter, Timothy Sykes, Lennart Opitz, Griffin White, Laura Neff, Doris Popovic, Andrea Patrignani, Jay Tracy, Ralph Schlapbach, Christiane Beckmann, Maurice Redondo, Olivier Kobel, Christoph Noppen, Sophie Seidel, Noemie Santamaria de Souza, Niko Beerenwinkel, Tanja Stadler |
| EPI_ISL_1119815, EPI_ISL_1119817, EPI_ISL_1119818                                                                                                                                                                                                                                                                                                                                                                                                                                                                                                                                                                                                                                                                                                                                                                                                                                                                                                                                                                                                                                                                                                                                                                                                                                                                                                                                                                                                                                                                                                                                                                                                                                                                                                                                                                                                                                                                                                                                                                                                                                                                                                                                                                                                                                                                                                                                                                                                                                                                                                                                                                                                                                                                                                                                                                                                                                 | Viollier AG | Department of Biosystems Science and Engineering, ETH Zürich | Chaoran Chen, Sarah Nadeau, Ivan Topolsky, Emmanouil Dermitzakis, Keith Harshman, Ioannis Xenarios, Henri Pegeot, Lorenzo Cerutti, Deborah Penet, Philipp Jablonski, Lara Fuhrmann, David Dreifuss, Katharina Jahn, Christiane Beckmann, Maurice Redondo, Olivier Kobel, Christoph Noppen, Sophie Seidel, Noemie Santamaria de Souza, Niko Beerenwinkel, Tanja Stadler                                                                                                   |
| EPI_ISL_1119819, EPI_ISL_1119822, EPI_ISL_1119823, EPI_ISL_1119825, EPI_ISL_1119826, EPI_ISL_1119828, EPI_ISL_1119829                                                                                                                                                                                                                                                                                                                                                                                                                                                                                                                                                                                                                                                                                                                                                                                                                                                                                                                                                                                                                                                                                                                                                                                                                                                                                                                                                                                                                                                                                                                                                                                                                                                                                                                                                                                                                                                                                                                                                                                                                                                                                                                                                                                                                                                                                                                                                                                                                                                                                                                                                                                                                                                                                                                                                             | Viollier AG | Department of Biosystems Science and Engineering, ETH Zürich | Chaoran Chen, Sarah Nadeau, Catharine Aquino, Ivan Topolsky, Philipp Jablonski, Lara Fuhrmann, David Dreifuss, Katharina Jahn, Andreia Cabral de Gouvea, Maria Domenica Moccia, Simon Grüter, Timothy Sykes, Lennart Opitz, Griffin White, Laura Neff, Doris Popovic, Andrea Patrignani, Jay Tracy, Ralph Schlapbach, Christiane Beckmann, Maurice Redondo, Olivier Kobel, Christoph Noppen, Sophie Seidel, Noemie Santamaria de Souza, Niko Beerenwinkel, Tanja Stadler |
| EPI_ISL_1119830                                                                                                                                                                                                                                                                                                                                                                                                                                                                                                                                                                                                                                                                                                                                                                                                                                                                                                                                                                                                                                                                                                                                                                                                                                                                                                                                                                                                                                                                                                                                                                                                                                                                                                                                                                                                                                                                                                                                                                                                                                                                                                                                                                                                                                                                                                                                                                                                                                                                                                                                                                                                                                                                                                                                                                                                                                                                   | Viollier AG | Department of Biosystems Science and Engineering, ETH Zürich | Chaoran Chen, Sarah Nadeau, Ivan Topolsky, Emmanouil Dermitzakis, Keith Harshman, Ioannis Xenarios, Henri Pegeot, Lorenzo Cerutti, Deborah Penet, Philipp Jablonski, Lara Fuhrmann, David Dreifuss, Katharina Jahn, Christiane Beckmann, Maurice Redondo, Olivier Kobel, Christoph Noppen, Sophie Seidel, Noemie Santamaria de Souza, Niko Beerenwinkel, Tanja Stadler                                                                                                   |
| EPI_ISL_1119833, EPI_ISL_1119834, EPI_ISL_1119835, EPI_ISL_1119838, EPI_ISL_1119839, EPI_ISL_1119842                                                                                                                                                                                                                                                                                                                                                                                                                                                                                                                                                                                                                                                                                                                                                                                                                                                                                                                                                                                                                                                                                                                                                                                                                                                                                                                                                                                                                                                                                                                                                                                                                                                                                                                                                                                                                                                                                                                                                                                                                                                                                                                                                                                                                                                                                                                                                                                                                                                                                                                                                                                                                                                                                                                                                                              | Viollier AG | Department of Biosystems Science and Engineering, ETH Zürich | Chaoran Chen, Sarah Nadeau, Catharine Aquino, Ivan Topolsky, Philipp Jablonski, Lara Fuhrmann, David Dreifuss, Katharina Jahn, Andreia Cabral de Gouvea, Maria Domenica Moccia, Simon Grüter, Timothy Sykes, Lennart Opitz, Griffin White, Laura Neff, Doris Popovic, Andrea Patrignani, Jay Tracy, Ralph Schlapbach, Christiane Beckmann, Maurice Redondo, Olivier Kobel, Christoph Noppen, Sophie Seidel, Noemie Santamaria de Souza, Niko Beerenwinkel, Tanja Stadler |
| EPI_ISL_1119843, EPI_ISL_1119844                                                                                                                                                                                                                                                                                                                                                                                                                                                                                                                                                                                                                                                                                                                                                                                                                                                                                                                                                                                                                                                                                                                                                                                                                                                                                                                                                                                                                                                                                                                                                                                                                                                                                                                                                                                                                                                                                                                                                                                                                                                                                                                                                                                                                                                                                                                                                                                                                                                                                                                                                                                                                                                                                                                                                                                                                                                  | Viollier AG | Department of Biosystems Science and Engineering, ETH Zürich | Chaoran Chen, Sarah Nadeau, Ivan Topolsky, Emmanouil Dermitzakis, Keith Harshman, Ioannis Xenarios, Henri Pegeot, Lorenzo Cerutti, Deborah Penet, Philipp Jablonski, Lara Fuhrmann, David Dreifuss, Katharina Jahn, Christiane Beckmann, Maurice Redondo, Olivier Kobel, Christoph Noppen, Sophie Seidel, Noemie Santamaria de Souza, Niko Beerenwinkel, Tanja Stadler                                                                                                   |
| EPI_ISL_1119845                                                                                                                                                                                                                                                                                                                                                                                                                                                                                                                                                                                                                                                                                                                                                                                                                                                                                                                                                                                                                                                                                                                                                                                                                                                                                                                                                                                                                                                                                                                                                                                                                                                                                                                                                                                                                                                                                                                                                                                                                                                                                                                                                                                                                                                                                                                                                                                                                                                                                                                                                                                                                                                                                                                                                                                                                                                                   | Viollier AG | Department of Biosystems Science and Engineering, ETH Zürich | Chaoran Chen, Sarah Nadeau, Catharine Aquino, Ivan Topolsky, Philipp Jablonski, Lara Fuhrmann, David Dreifuss, Katharina Jahn, Andreia Cabral de Gouvea, Maria Domenica Moccia, Simon Grüter, Timothy Sykes, Lennart Opitz, Griffin White, Laura Neff, Doris Popovic, Andrea Patrignani, Jay Tracy, Ralph Schlapbach, Christiane Beckmann, Maurice Redondo, Olivier Kobel, Christoph Noppen, Sophie Seidel, Noemie Santamaria de Souza, Niko Beerenwinkel, Tanja Stadler |
| EPI_ISL_1119846, EPI_ISL_1119848, EPI_ISL_1119849                                                                                                                                                                                                                                                                                                                                                                                                                                                                                                                                                                                                                                                                                                                                                                                                                                                                                                                                                                                                                                                                                                                                                                                                                                                                                                                                                                                                                                                                                                                                                                                                                                                                                                                                                                                                                                                                                                                                                                                                                                                                                                                                                                                                                                                                                                                                                                                                                                                                                                                                                                                                                                                                                                                                                                                                                                 | Viollier AG | Department of Biosystems Science and Engineering, ETH Zürich | Chaoran Chen, Sarah Nadeau, Ivan Topolsky, Emmanouil Dermitzakis, Keith Harshman, Ioannis Xenarios, Henri Pegeot, Lorenzo Cerutti, Deborah Penet, Philipp Jablonski, Lara Fuhrmann, David Dreifuss, Katharina Jahn, Christiane Beckmann, Maurice Redondo, Olivier Kobel, Christoph Noppen, Sophie Seidel, Noemie Santamaria de Souza, Niko Beerenwinkel, Tanja Stadler                                                                                                   |
| EPI_ISL_1119850                                                                                                                                                                                                                                                                                                                                                                                                                                                                                                                                                                                                                                                                                                                                                                                                                                                                                                                                                                                                                                                                                                                                                                                                                                                                                                                                                                                                                                                                                                                                                                                                                                                                                                                                                                                                                                                                                                                                                                                                                                                                                                                                                                                                                                                                                                                                                                                                                                                                                                                                                                                                                                                                                                                                                                                                                                                                   | Viollier AG | Department of Biosystems Science and Engineering, ETH Zürich | Chaoran Chen, Sarah Nadeau, Catharine Aquino, Ivan Topolsky, Philipp Jablonski, Lara Fuhrmann, David Dreifuss, Katharina Jahn, Andreia Cabral de Gouvea, Maria Domenica Moccia, Simon Grüter, Timothy Sykes, Lennart Opitz, Griffin White, Laura Neff, Doris Popovic, Andrea Patrignani, Jay Tracy, Ralph Schlapbach, Christiane Beckmann, Maurice Redondo, Olivier Kobel, Christoph Noppen, Sophie Seidel, Noemie Santamaria de Souza, Niko Beerenwinkel, Tanja Stadler |
| EPI_ISL_1119851, EPI_ISL_1119853                                                                                                                                                                                                                                                                                                                                                                                                                                                                                                                                                                                                                                                                                                                                                                                                                                                                                                                                                                                                                                                                                                                                                                                                                                                                                                                                                                                                                                                                                                                                                                                                                                                                                                                                                                                                                                                                                                                                                                                                                                                                                                                                                                                                                                                                                                                                                                                                                                                                                                                                                                                                                                                                                                                                                                                                                                                  | Viollier AG | Department of Biosystems Science and Engineering, ETH Zürich | Chaoran Chen, Sarah Nadeau, Ivan Topolsky, Emmanouil Dermitzakis, Keith Harshman, Ioannis Xenarios, Henri Pegeot, Lorenzo Cerutti, Deborah Penet, Philipp Jablonski, Lara Fuhrmann, David Dreifuss, Katharina Jahn, Christiane Beckmann, Maurice Redondo, Olivier Kobel, Christoph Noppen, Sophie Seidel, Noemie Santamaria de Souza, Niko Beerenwinkel, Tanja Stadler                                                                                                   |
| EPI_ISL_1119857, EPI_ISL_1119858, EPI_ISL_1119859, EPI_ISL_1119860, EPI_ISL_1119861, EPI_ISL_1119862, EPI_ISL_1119863, EPI_ISL_1119864, EPI_ISL_1119865, EPI_ISL_1119866, EPI_ISL_1119867, EPI_ISL_1119869, EPI_ISL_1119870, EPI_ISL_1119872, EPI_ISL_1119873, EPI_ISL_1119874, EPI_ISL_1119875, EPI_ISL_1119876, EPI_ISL_1119879, EPI_ISL_1119880, EPI_ISL_1119881, EPI_ISL_1119882, EPI_ISL_1119884, EPI_ISL_1119885                                                                                                                                                                                                                                                                                                                                                                                                                                                                                                                                                                                                                                                                                                                                                                                                                                                                                                                                                                                                                                                                                                                                                                                                                                                                                                                                                                                                                                                                                                                                                                                                                                                                                                                                                                                                                                                                                                                                                                                                                                                                                                                                                                                                                                                                                                                                                                                                                                                            |             |                                                              |                                                                                                                                                                                                                                                                                                                                                                                                                                                                          |
| see above                                                                                                                                                                                                                                                                                                                                                                                                                                                                                                                                                                                                                                                                                                                                                                                                                                                                                                                                                                                                                                                                                                                                                                                                                                                                                                                                                                                                                                                                                                                                                                                                                                                                                                                                                                                                                                                                                                                                                                                                                                                                                                                                                                                                                                                                                                                                                                                                                                                                                                                                                                                                                                                                                                                                                                                                                                                                         | Viollier AG | Department of Biosystems Science and Engineering, ETH Zürich | Chaoran Chen, Sarah Nadeau, Catharine Aquino, Ivan Topolsky, Philipp Jablonski, Lara Fuhrmann, David Dreifuss, Katharina Jahn, Andreia Cabral de Gouvea, Maria Domenica Moccia, Simon Grüter, Timothy Sykes, Lennart Opitz, Griffin White, Laura Neff, Doris Popovic, Andrea Patrignani, Jay Tracy, Ralph Schlapbach, Christiane Beckmann, Maurice Redondo, Olivier Kobel, Christoph Noppen, Sophie Seidel, Noemie Santamaria de Souza, Niko Beerenwinkel, Tanja Stadler |
| EPI_ISL_1119887                                                                                                                                                                                                                                                                                                                                                                                                                                                                                                                                                                                                                                                                                                                                                                                                                                                                                                                                                                                                                                                                                                                                                                                                                                                                                                                                                                                                                                                                                                                                                                                                                                                                                                                                                                                                                                                                                                                                                                                                                                                                                                                                                                                                                                                                                                                                                                                                                                                                                                                                                                                                                                                                                                                                                                                                                                                                   | Viollier AG | Department of Biosystems Science and Engineering, ETH Zürich | Chaoran Chen, Sarah Nadeau, Ivan Topolsky, Emmanouil Dermitzakis, Keith Harshman, Ioannis Xenarios, Henri Pegeot, Lorenzo Cerutti, Deborah Penet, Philipp Jablonski, Lara Fuhrmann, David Dreifuss, Katharina Jahn, Christiane Beckmann, Maurice Redondo, Olivier Kobel, Christoph Noppen, Sophie Seidel, Noemie Santamaria de Souza, Niko Beerenwinkel, Tanja Stadler                                                                                                   |
| EPI_ISL_1119889, EPI_ISL_1119891, EPI_ISL_1119892, EPI_ISL_1119896, EPI_ISL_1119898                                                                                                                                                                                                                                                                                                                                                                                                                                                                                                                                                                                                                                                                                                                                                                                                                                                                                                                                                                                                                                                                                                                                                                                                                                                                                                                                                                                                                                                                                                                                                                                                                                                                                                                                                                                                                                                                                                                                                                                                                                                                                                                                                                                                                                                                                                                                                                                                                                                                                                                                                                                                                                                                                                                                                                                               | Viollier AG | Department of Biosystems Science and Engineering, ETH Zürich | Chaoran Chen, Sarah Nadeau, Catharine Aquino, Ivan Topolsky, Philipp Jablonski, Lara Fuhrmann, David Dreifuss, Katharina Jahn, Andreia Cabral de Gouvea, Maria Domenica Moccia, Simon Grüter, Timothy Sykes, Lennart Opitz, Griffin White, Laura Neff, Doris Popovic, Andrea Patrignani, Jay Tracy, Ralph Schlapbach, Christiane Beckmann, Maurice Redondo, Olivier Kobel, Christoph Noppen, Sophie Seidel, Noemie Santamaria de Souza, Niko Beerenwinkel, Tanja Stadler |
| EPI_ISL_1119903, EPI_ISL_1119904, EPI_ISL_1119905, EPI_ISL_1119908, EPI_ISL_1119909, EPI_ISL_1119910, EPI_ISL_1119911, EPI_ISL_1119912, EPI_ISL_1119913, EPI_ISL_1119914, EPI_ISL_1119916, EPI_ISL_1119917, EPI_ISL_1119919, EPI_ISL_1119920, EPI_ISL_1119921, EPI_ISL_1119922, EPI_ISL_1119925, EPI_ISL_1119926, EPI_ISL_1119927, EPI_ISL_1119930, EPI_ISL_1119931, EPI_ISL_1119932, EPI_ISL_1119934, EPI_ISL_1119935, EPI_ISL_1119936, EPI_ISL_1119937, EPI_ISL_1119940, EPI_ISL_1119941, EPI_ISL_1119943, EPI_ISL_1119944, EPI_ISL_1119946, EPI_ISL_1119947, EPI_ISL_1119949, EPI_ISL_1119950, EPI_ISL_1119951, EPI_ISL_1119952                                                                                                                                                                                                                                                                                                                                                                                                                                                                                                                                                                                                                                                                                                                                                                                                                                                                                                                                                                                                                                                                                                                                                                                                                                                                                                                                                                                                                                                                                                                                                                                                                                                                                                                                                                                                                                                                                                                                                                                                                                                                                                                                                                                                                                                |             |                                                              |                                                                                                                                                                                                                                                                                                                                                                                                                                                                          |
| see above                                                                                                                                                                                                                                                                                                                                                                                                                                                                                                                                                                                                                                                                                                                                                                                                                                                                                                                                                                                                                                                                                                                                                                                                                                                                                                                                                                                                                                                                                                                                                                                                                                                                                                                                                                                                                                                                                                                                                                                                                                                                                                                                                                                                                                                                                                                                                                                                                                                                                                                                                                                                                                                                                                                                                                                                                                                                         | Viollier AG | Department of Biosystems Science and Engineering, ETH Zürich | Chaoran Chen, Sarah Nadeau, Ivan Topolsky, Emmanouil Dermitzakis, Keith Harshman, Ioannis Xenarios, Henri Pegeot, Lorenzo Cerutti, Deborah Penet, Philipp Jablonski, Lara Fuhrmann, David Dreifuss, Katharina Jahn, Christiane Beckmann, Maurice Redondo, Olivier Kobel, Christoph Noppen, Sophie Seidel, Noemie Santamaria de Souza, Niko Beerenwinkel, Tanja Stadler                                                                                                   |

|                                                                                                                                                                                                                                                                                                                                                                                                                                                                                                                                                                                                                                                                                                                                                                                                                                                                                                                                                                                                                                                                                                                                                                                                                                                                                                                                                                                                                                                                                                                                                                                                                                                                                                                                                                                                                                                                                                                                                                                                                  |                                                                                                          |                                                                                                          |                                                                                                                                                                                                                                                                                                         |                                                                                  |
|------------------------------------------------------------------------------------------------------------------------------------------------------------------------------------------------------------------------------------------------------------------------------------------------------------------------------------------------------------------------------------------------------------------------------------------------------------------------------------------------------------------------------------------------------------------------------------------------------------------------------------------------------------------------------------------------------------------------------------------------------------------------------------------------------------------------------------------------------------------------------------------------------------------------------------------------------------------------------------------------------------------------------------------------------------------------------------------------------------------------------------------------------------------------------------------------------------------------------------------------------------------------------------------------------------------------------------------------------------------------------------------------------------------------------------------------------------------------------------------------------------------------------------------------------------------------------------------------------------------------------------------------------------------------------------------------------------------------------------------------------------------------------------------------------------------------------------------------------------------------------------------------------------------------------------------------------------------------------------------------------------------|----------------------------------------------------------------------------------------------------------|----------------------------------------------------------------------------------------------------------|---------------------------------------------------------------------------------------------------------------------------------------------------------------------------------------------------------------------------------------------------------------------------------------------------------|----------------------------------------------------------------------------------|
| Seidel, Noemie Santamaria de Souza, Niko Beerenwinkel, Tanja Stadler                                                                                                                                                                                                                                                                                                                                                                                                                                                                                                                                                                                                                                                                                                                                                                                                                                                                                                                                                                                                                                                                                                                                                                                                                                                                                                                                                                                                                                                                                                                                                                                                                                                                                                                                                                                                                                                                                                                                             |                                                                                                          |                                                                                                          |                                                                                                                                                                                                                                                                                                         |                                                                                  |
| EPI_ISL_1122011, EPI_ISL_1122012                                                                                                                                                                                                                                                                                                                                                                                                                                                                                                                                                                                                                                                                                                                                                                                                                                                                                                                                                                                                                                                                                                                                                                                                                                                                                                                                                                                                                                                                                                                                                                                                                                                                                                                                                                                                                                                                                                                                                                                 | Kentucky State Public Health Lab                                                                         | Kentucky State Public Health Lab                                                                         | Stephanie Lunn, Karim George, Joshua Tobias, William Grooms, Vaneet Arora, Matthew Johnson, Rachel Zinner, Rhonda Lucas                                                                                                                                                                                 |                                                                                  |
| EPI_ISL_1122349, EPI_ISL_1122350, EPI_ISL_1122351, EPI_ISL_1122352, EPI_ISL_1122353, EPI_ISL_1122354                                                                                                                                                                                                                                                                                                                                                                                                                                                                                                                                                                                                                                                                                                                                                                                                                                                                                                                                                                                                                                                                                                                                                                                                                                                                                                                                                                                                                                                                                                                                                                                                                                                                                                                                                                                                                                                                                                             | Ibaraki Prefectural Institute of Public Health                                                           | Ibaraki Prefectural Institute of Public Health                                                           | Keiko Goto, Tsuyoshi Sekizuka, Kentaro Itokawa, Rina Tanaka, Masanori Hashino, Makoto Kuroda                                                                                                                                                                                                            |                                                                                  |
| EPI_ISL_1123264                                                                                                                                                                                                                                                                                                                                                                                                                                                                                                                                                                                                                                                                                                                                                                                                                                                                                                                                                                                                                                                                                                                                                                                                                                                                                                                                                                                                                                                                                                                                                                                                                                                                                                                                                                                                                                                                                                                                                                                                  | Rangamati General Hospital RT-PCR lab                                                                    | Central Biological Research Laboratory and Department of Biochemistry and Molecular Biology              | Mohammad Omar Faruque, H. M. Abdullah Al Masud, Imam Hossen, Md. Khondakar Raziur Rahman, Sajib Rudra, Md. Arif Hossain, Shanta Paul, Md. Omer Faruq, Robiul Hasan Bhuiyan, Md. Imranul Hoq                                                                                                             |                                                                                  |
| EPI_ISL_1123266                                                                                                                                                                                                                                                                                                                                                                                                                                                                                                                                                                                                                                                                                                                                                                                                                                                                                                                                                                                                                                                                                                                                                                                                                                                                                                                                                                                                                                                                                                                                                                                                                                                                                                                                                                                                                                                                                                                                                                                                  | Cox's Bazar Medical College                                                                              | Central Biological Research Laboratory and Department of Biochemistry and Molecular Biology              | Mohammad Omar Faruque, H. M. Abdullah Al Masud, Sajib Rudra, Md. Omer Faruq, Md. Khondakar Raziur Rahman, Imam Hossen, Md. Arif Hossain, Shanta Paul, Robiul Hasan Bhuiyan, Md. Imranul Hoq                                                                                                             |                                                                                  |
| EPI_ISL_1123267                                                                                                                                                                                                                                                                                                                                                                                                                                                                                                                                                                                                                                                                                                                                                                                                                                                                                                                                                                                                                                                                                                                                                                                                                                                                                                                                                                                                                                                                                                                                                                                                                                                                                                                                                                                                                                                                                                                                                                                                  | Cox's Bazar Medical College                                                                              | Central Biological Research Laboratory and Department of Biochemistry and Molecular Biology              | H. M. Abdullah Al Masud, Mohammad Omar Faruque, Sajib Rudra, Md. Khondakar Raziur Rahman, Imam Hossen, Md. Arif Hossain, Shanta Paul, Md. Omer Faruq, Md. Imranul Hoq, Robiul Hasan Bhuiyan                                                                                                             |                                                                                  |
| EPI_ISL_1123268                                                                                                                                                                                                                                                                                                                                                                                                                                                                                                                                                                                                                                                                                                                                                                                                                                                                                                                                                                                                                                                                                                                                                                                                                                                                                                                                                                                                                                                                                                                                                                                                                                                                                                                                                                                                                                                                                                                                                                                                  | Chattogram Veterinary and Animal Sciences University                                                     | Central Biological Research Laboratory and Department of Biochemistry and Molecular Biology              | H. M. Abdullah Al Masud, Mohammad Omar Faruque, Md. Arif Hossain, Shanta Paul, Md. Khondakar Raziur Rahman, Imam Hossen, Sajib Rudra, Md. Omer Faruq, Md. Imranul Hoq, Robiul Hasan Bhuiyan                                                                                                             |                                                                                  |
| EPI_ISL_1123677, EPI_ISL_1123816, EPI_ISL_1123862                                                                                                                                                                                                                                                                                                                                                                                                                                                                                                                                                                                                                                                                                                                                                                                                                                                                                                                                                                                                                                                                                                                                                                                                                                                                                                                                                                                                                                                                                                                                                                                                                                                                                                                                                                                                                                                                                                                                                                | Department of Virus and Microbiological Special Diagnostics, Statens Serum Institut, Copenhagen, Denmark | Aalborg University                                                                                       | Danish Covid-19 Genome Consortium                                                                                                                                                                                                                                                                       |                                                                                  |
| EPI_ISL_1123895, EPI_ISL_1123897, EPI_ISL_1123898                                                                                                                                                                                                                                                                                                                                                                                                                                                                                                                                                                                                                                                                                                                                                                                                                                                                                                                                                                                                                                                                                                                                                                                                                                                                                                                                                                                                                                                                                                                                                                                                                                                                                                                                                                                                                                                                                                                                                                | Pathogen Genomics Center, National Institute of Infectious Diseases                                      | Pathogen Genomics Center, National Institute of Infectious Diseases                                      | Tsuyoshi Sekizuka, Kentaro Itokawa, Rina Tanaka, Masanori Hashino, Makoto Kuroda                                                                                                                                                                                                                        |                                                                                  |
| EPI_ISL_1123899                                                                                                                                                                                                                                                                                                                                                                                                                                                                                                                                                                                                                                                                                                                                                                                                                                                                                                                                                                                                                                                                                                                                                                                                                                                                                                                                                                                                                                                                                                                                                                                                                                                                                                                                                                                                                                                                                                                                                                                                  | Department of Virus and Microbiological Special Diagnostics, Statens Serum Institut, Copenhagen, Denmark | Aalborg University                                                                                       | Danish Covid-19 Genome Consortium                                                                                                                                                                                                                                                                       |                                                                                  |
| EPI_ISL_1123900, EPI_ISL_1123902, EPI_ISL_1123904, EPI_ISL_1123905, EPI_ISL_1123907                                                                                                                                                                                                                                                                                                                                                                                                                                                                                                                                                                                                                                                                                                                                                                                                                                                                                                                                                                                                                                                                                                                                                                                                                                                                                                                                                                                                                                                                                                                                                                                                                                                                                                                                                                                                                                                                                                                              | Pathogen Genomics Center, National Institute of Infectious Diseases                                      | Pathogen Genomics Center, National Institute of Infectious Diseases                                      | Tsuyoshi Sekizuka, Kentaro Itokawa, Rina Tanaka, Masanori Hashino, Makoto Kuroda                                                                                                                                                                                                                        |                                                                                  |
| EPI_ISL_1123930, EPI_ISL_1123939, EPI_ISL_1124132, EPI_ISL_1124134, EPI_ISL_1124136, EPI_ISL_1124169                                                                                                                                                                                                                                                                                                                                                                                                                                                                                                                                                                                                                                                                                                                                                                                                                                                                                                                                                                                                                                                                                                                                                                                                                                                                                                                                                                                                                                                                                                                                                                                                                                                                                                                                                                                                                                                                                                             | Department of Virus and Microbiological Special Diagnostics, Statens Serum Institut, Copenhagen, Denmark | Aalborg University                                                                                       | Danish Covid-19 Genome Consortium                                                                                                                                                                                                                                                                       |                                                                                  |
| EPI_ISL_1124199                                                                                                                                                                                                                                                                                                                                                                                                                                                                                                                                                                                                                                                                                                                                                                                                                                                                                                                                                                                                                                                                                                                                                                                                                                                                                                                                                                                                                                                                                                                                                                                                                                                                                                                                                                                                                                                                                                                                                                                                  | Toyama Institute of Health                                                                               | Pathogen Genomics Center, National Institute of Infectious Diseases                                      | Tsuyoshi Sekizuka, Kentaro Itokawa, Rina Tanaka, Masanori Hashino, Makoto Kuroda                                                                                                                                                                                                                        |                                                                                  |
| EPI_ISL_1124249, EPI_ISL_1124326                                                                                                                                                                                                                                                                                                                                                                                                                                                                                                                                                                                                                                                                                                                                                                                                                                                                                                                                                                                                                                                                                                                                                                                                                                                                                                                                                                                                                                                                                                                                                                                                                                                                                                                                                                                                                                                                                                                                                                                 | Department of Virus and Microbiological Special Diagnostics, Statens Serum Institut, Copenhagen, Denmark | Aalborg University                                                                                       | Danish Covid-19 Genome Consortium                                                                                                                                                                                                                                                                       |                                                                                  |
| EPI_ISL_1124337, EPI_ISL_1124339, EPI_ISL_1124341, EPI_ISL_1124342, EPI_ISL_1124344, EPI_ISL_1124346, EPI_ISL_1124348, EPI_ISL_1124349, EPI_ISL_1124351, EPI_ISL_1124353, EPI_ISL_1124355, EPI_ISL_1124356                                                                                                                                                                                                                                                                                                                                                                                                                                                                                                                                                                                                                                                                                                                                                                                                                                                                                                                                                                                                                                                                                                                                                                                                                                                                                                                                                                                                                                                                                                                                                                                                                                                                                                                                                                                                       | see above                                                                                                | Osaka Institute of Public Health, Morinomiya Center                                                      | Pathogen Genomics Center, National Institute of Infectious Diseases                                                                                                                                                                                                                                     |                                                                                  |
| EPI_ISL_1124425, EPI_ISL_1124466, EPI_ISL_1124473                                                                                                                                                                                                                                                                                                                                                                                                                                                                                                                                                                                                                                                                                                                                                                                                                                                                                                                                                                                                                                                                                                                                                                                                                                                                                                                                                                                                                                                                                                                                                                                                                                                                                                                                                                                                                                                                                                                                                                | Department of Virus and Microbiological Special Diagnostics, Statens Serum Institut, Copenhagen, Denmark | Aalborg University                                                                                       | Danish Covid-19 Genome Consortium                                                                                                                                                                                                                                                                       |                                                                                  |
| EPI_ISL_1124508, EPI_ISL_1124510, EPI_ISL_1124512, EPI_ISL_1124514, EPI_ISL_1124516                                                                                                                                                                                                                                                                                                                                                                                                                                                                                                                                                                                                                                                                                                                                                                                                                                                                                                                                                                                                                                                                                                                                                                                                                                                                                                                                                                                                                                                                                                                                                                                                                                                                                                                                                                                                                                                                                                                              | Pathogen Genomics Center, National Institute of Infectious Diseases                                      | Pathogen Genomics Center, National Institute of Infectious Diseases                                      | Tsuyoshi Sekizuka, Kentaro Itokawa, Rina Tanaka, Masanori Hashino, Makoto Kuroda                                                                                                                                                                                                                        |                                                                                  |
| EPI_ISL_1124649, EPI_ISL_1124780, EPI_ISL_1124790, EPI_ISL_1125022, EPI_ISL_1125024, EPI_ISL_1125048, EPI_ISL_1125075, EPI_ISL_1125080, EPI_ISL_1125121, EPI_ISL_1125199, EPI_ISL_1125202, EPI_ISL_1125251, EPI_ISL_1125292, EPI_ISL_1125333, EPI_ISL_1125452, EPI_ISL_1125459, EPI_ISL_1125464, EPI_ISL_1125487, EPI_ISL_1125505, EPI_ISL_1125521, EPI_ISL_1125548, EPI_ISL_1125564, EPI_ISL_1125584, EPI_ISL_1125618, EPI_ISL_1125657, EPI_ISL_1125663, EPI_ISL_1125683, EPI_ISL_1125702, EPI_ISL_1125744, EPI_ISL_1125795, EPI_ISL_1125814, EPI_ISL_1125857, EPI_ISL_1125887, EPI_ISL_1125891, EPI_ISL_1125908, EPI_ISL_1125937, EPI_ISL_1126007, EPI_ISL_1126017, EPI_ISL_1126033, EPI_ISL_1126037, EPI_ISL_1126058, EPI_ISL_1126153, EPI_ISL_1126171, EPI_ISL_1126176, EPI_ISL_1126190, EPI_ISL_1126201, EPI_ISL_1126218, EPI_ISL_1126313, EPI_ISL_1126372, EPI_ISL_1126377, EPI_ISL_1126560, EPI_ISL_1126582, EPI_ISL_1126656, EPI_ISL_1126675, EPI_ISL_1126699, EPI_ISL_1126753, EPI_ISL_1126760, EPI_ISL_1126790, EPI_ISL_1126953, EPI_ISL_1126961, EPI_ISL_1126962, EPI_ISL_1126981, EPI_ISL_1127014, EPI_ISL_1127015                                                                                                                                                                                                                                                                                                                                                                                                                                                                                                                                                                                                                                                                                                                                                                                                                                                                                   | see above                                                                                                | Department of Virus and Microbiological Special Diagnostics, Statens Serum Institut, Copenhagen, Denmark | Aalborg University                                                                                                                                                                                                                                                                                      | Danish Covid-19 Genome Consortium                                                |
| EPI_ISL_1127119, EPI_ISL_1127120, EPI_ISL_1127155                                                                                                                                                                                                                                                                                                                                                                                                                                                                                                                                                                                                                                                                                                                                                                                                                                                                                                                                                                                                                                                                                                                                                                                                                                                                                                                                                                                                                                                                                                                                                                                                                                                                                                                                                                                                                                                                                                                                                                | Pathogen Genomics Center, National Institute of Infectious Diseases                                      | Pathogen Genomics Center, National Institute of Infectious Diseases                                      | Tsuyoshi Sekizuka, Kentaro Itokawa, Rina Tanaka, Masanori Hashino, Makoto Kuroda                                                                                                                                                                                                                        |                                                                                  |
| EPI_ISL_1127157                                                                                                                                                                                                                                                                                                                                                                                                                                                                                                                                                                                                                                                                                                                                                                                                                                                                                                                                                                                                                                                                                                                                                                                                                                                                                                                                                                                                                                                                                                                                                                                                                                                                                                                                                                                                                                                                                                                                                                                                  | Osaka Institute of Public Health, Morinomiya Center                                                      | Pathogen Genomics Center, National Institute of Infectious Diseases                                      | Tsuyoshi Sekizuka, Kentaro Itokawa, Rina Tanaka, Masanori Hashino, Makoto Kuroda                                                                                                                                                                                                                        |                                                                                  |
| EPI_ISL_1127396, EPI_ISL_1127397, EPI_ISL_1127398, EPI_ISL_1127399, EPI_ISL_1127400, EPI_ISL_1127401, EPI_ISL_1127402, EPI_ISL_1127403, EPI_ISL_1127404, EPI_ISL_1127405, EPI_ISL_1127406, EPI_ISL_1127407, EPI_ISL_1127408, EPI_ISL_1127409, EPI_ISL_1127410, EPI_ISL_1127411, EPI_ISL_1127412, EPI_ISL_1127413, EPI_ISL_1127414, EPI_ISL_1127415, EPI_ISL_1127416, EPI_ISL_1127417, EPI_ISL_1127418, EPI_ISL_1127419, EPI_ISL_1127420, EPI_ISL_1127421, EPI_ISL_1127422, EPI_ISL_1127423, EPI_ISL_1127424, EPI_ISL_1127425, EPI_ISL_1127426, EPI_ISL_1127427, EPI_ISL_1127428, EPI_ISL_1127429, EPI_ISL_1127430, EPI_ISL_1127431, EPI_ISL_1127432, EPI_ISL_1127433, EPI_ISL_1127434, EPI_ISL_1127435, EPI_ISL_1127436, EPI_ISL_1127437, EPI_ISL_1127438, EPI_ISL_1127439, EPI_ISL_1127440, EPI_ISL_1127441, EPI_ISL_1127442, EPI_ISL_1127443, EPI_ISL_1127444, EPI_ISL_1127445, EPI_ISL_1127446, EPI_ISL_1127447, EPI_ISL_1127448, EPI_ISL_1127449, EPI_ISL_1127450, EPI_ISL_1127451, EPI_ISL_1127681, EPI_ISL_1127682, EPI_ISL_1127683, EPI_ISL_1127684, EPI_ISL_1127685, EPI_ISL_1127686, EPI_ISL_1127687, EPI_ISL_1127688, EPI_ISL_1127689, EPI_ISL_1127690, EPI_ISL_1127691, EPI_ISL_1127692, EPI_ISL_1127693, EPI_ISL_1127694, EPI_ISL_1127695, EPI_ISL_1127696, EPI_ISL_1127697, EPI_ISL_1127698, EPI_ISL_1127699, EPI_ISL_1127700, EPI_ISL_1127701, EPI_ISL_1127702, EPI_ISL_1127703, EPI_ISL_1127704, EPI_ISL_1127705, EPI_ISL_1127706, EPI_ISL_1127707, EPI_ISL_1127708, EPI_ISL_1127709, EPI_ISL_1127710, EPI_ISL_1127711, EPI_ISL_1127712, EPI_ISL_1127713, EPI_ISL_1127714, EPI_ISL_1127715, EPI_ISL_1127716, EPI_ISL_1127717, EPI_ISL_1127718, EPI_ISL_1127719, EPI_ISL_1127720, EPI_ISL_1127721, EPI_ISL_1127722, EPI_ISL_1127723, EPI_ISL_1127724, EPI_ISL_1127725, EPI_ISL_1127726, EPI_ISL_1127727, EPI_ISL_1127728, EPI_ISL_1127729, EPI_ISL_1127730, EPI_ISL_1127731, EPI_ISL_1127732, EPI_ISL_1127733, EPI_ISL_1127734, EPI_ISL_1127735, EPI_ISL_1127736, EPI_ISL_1127737, EPI_ISL_1127738 | see above                                                                                                | Pathogen Genomics Center, National Institute of Infectious Diseases                                      | Pathogen Genomics Center, National Institute of Infectious Diseases                                                                                                                                                                                                                                     | Tsuyoshi Sekizuka, Kentaro Itokawa, Rina Tanaka, Masanori Hashino, Makoto Kuroda |
| EPI_ISL_1127947, EPI_ISL_1127948, EPI_ISL_1127949, EPI_ISL_1127950, EPI_ISL_1127951, EPI_ISL_1127952, EPI_ISL_1127953                                                                                                                                                                                                                                                                                                                                                                                                                                                                                                                                                                                                                                                                                                                                                                                                                                                                                                                                                                                                                                                                                                                                                                                                                                                                                                                                                                                                                                                                                                                                                                                                                                                                                                                                                                                                                                                                                            | Osaka Institute of Public Health, Morinomiya Center                                                      | Pathogen Genomics Center, National Institute of Infectious Diseases                                      | Tsuyoshi Sekizuka, Kentaro Itokawa, Rina Tanaka, Masanori Hashino, Makoto Kuroda                                                                                                                                                                                                                        |                                                                                  |
| EPI_ISL_1127999                                                                                                                                                                                                                                                                                                                                                                                                                                                                                                                                                                                                                                                                                                                                                                                                                                                                                                                                                                                                                                                                                                                                                                                                                                                                                                                                                                                                                                                                                                                                                                                                                                                                                                                                                                                                                                                                                                                                                                                                  | Kanagawa Prefectural Institute of Public Health                                                          | Pathogen Genomics Center, National Institute of Infectious Diseases                                      | Tsuyoshi Sekizuka, Kentaro Itokawa, Rina Tanaka, Masanori Hashino, Makoto Kuroda                                                                                                                                                                                                                        |                                                                                  |
| EPI_ISL_1128176, EPI_ISL_1128273, EPI_ISL_1128274, EPI_ISL_1128275, EPI_ISL_1128276, EPI_ISL_1128277, EPI_ISL_1128278, EPI_ISL_1128279, EPI_ISL_1128280, EPI_ISL_1128281, EPI_ISL_1128599, EPI_ISL_1128600, EPI_ISL_1128601, EPI_ISL_1128602, EPI_ISL_1128761, EPI_ISL_1128762, EPI_ISL_1128763, EPI_ISL_1128764, EPI_ISL_1128765, EPI_ISL_1128766, EPI_ISL_1128767, EPI_ISL_1128768, EPI_ISL_1129034, EPI_ISL_1129035, EPI_ISL_1129036, EPI_ISL_1129037, EPI_ISL_1129038, EPI_ISL_1129039, EPI_ISL_1129040, EPI_ISL_1129041, EPI_ISL_1129042, EPI_ISL_1129043, EPI_ISL_1129044, EPI_ISL_1129045, EPI_ISL_1129046, EPI_ISL_1129047, EPI_ISL_1129048, EPI_ISL_1129049, EPI_ISL_1129049, EPI_ISL_1129050, EPI_ISL_1129051, EPI_ISL_1129052, EPI_ISL_1129053, EPI_ISL_1129054, EPI_ISL_1129055, EPI_ISL_1129056, EPI_ISL_1129057, EPI_ISL_1129073, EPI_ISL_1129074, EPI_ISL_1129075, EPI_ISL_1129076, EPI_ISL_1129077, EPI_ISL_1129078, EPI_ISL_1129079, EPI_ISL_1129080, EPI_ISL_1129081, EPI_ISL_1129082, EPI_ISL_1129083, EPI_ISL_1129084, EPI_ISL_1129085, EPI_ISL_1129086, EPI_ISL_1129087, EPI_ISL_1129088, EPI_ISL_1129094, EPI_ISL_1129095, EPI_ISL_1129096, EPI_ISL_1129097, EPI_ISL_1129098, EPI_ISL_1129099, EPI_ISL_1129104, EPI_ISL_1129105, EPI_ISL_1129106, EPI_ISL_1129107, EPI_ISL_1129108, EPI_ISL_1129109, EPI_ISL_1129127, EPI_ISL_1129128, EPI_ISL_1129129, EPI_ISL_1129151, EPI_ISL_1129152, EPI_ISL_1129153, EPI_ISL_1129154, EPI_ISL_1129155, EPI_ISL_1129156, EPI_ISL_1129157, EPI_ISL_1129158, EPI_ISL_1129159, EPI_ISL_1129160, EPI_ISL_1129161, EPI_ISL_1129162, EPI_ISL_1129163, EPI_ISL_1129164, EPI_ISL_1129177, EPI_ISL_1129178, EPI_ISL_1129179, EPI_ISL_1129180, EPI_ISL_1129181, EPI_ISL_1129182, EPI_ISL_1129183, EPI_ISL_1129184, EPI_ISL_1129185, EPI_ISL_1129198, EPI_ISL_1129199, EPI_ISL_1129200, EPI_ISL_1129201, EPI_ISL_1129202, EPI_ISL_1129203, EPI_ISL_1129212, EPI_ISL_1129213, EPI_ISL_1129214                                                                     | see above                                                                                                | Pathogen Genomics Center, National Institute of Infectious Diseases                                      | Pathogen Genomics Center, National Institute of Infectious Diseases                                                                                                                                                                                                                                     | Tsuyoshi Sekizuka, Kentaro Itokawa, Rina Tanaka, Masanori Hashino, Makoto Kuroda |
| EPI_ISL_1129310                                                                                                                                                                                                                                                                                                                                                                                                                                                                                                                                                                                                                                                                                                                                                                                                                                                                                                                                                                                                                                                                                                                                                                                                                                                                                                                                                                                                                                                                                                                                                                                                                                                                                                                                                                                                                                                                                                                                                                                                  | Viollier AG                                                                                              | Department of Biosystems Science and Engineering, ETH Zürich                                             | Christian Beisel, Sarah Nadeau, Chaoran Chen, Ivan Topolsky, Philipp Jablonski, Lara Fuhrmann, David Dreiffuss, Katharina Jahn, Rebecca Denes, Mirjam Feldkamp, Ina Nissen, Natascha Santacroce, Elodie Burcklen, Christiane Beckmann, Maurice Redondo, Olivier Kobel, Christoph Noppen, Sophie Seidel, |                                                                                  |

|                                                                                                                                                                                                                                                                                                                                                                                                                                                                                                                                                                                                                                                                                                                                                                                                                                                                                                                                                                                                                                                                                                                                                                                                                                                                                                                                                                                                                                                                                                                                                                                                                                                                                                                                                                                                                                                                                                                                                                                                                                                                                                                                                                                                                                                                                                                                                                                                                                                                                                                                                                                                                                                                                                                                                                                                                                                                                                                                                                        |                                                                                            |                                                                                                            |                                                                                                                                                                                                                                                                                                                                                                                                                                                                           |
|------------------------------------------------------------------------------------------------------------------------------------------------------------------------------------------------------------------------------------------------------------------------------------------------------------------------------------------------------------------------------------------------------------------------------------------------------------------------------------------------------------------------------------------------------------------------------------------------------------------------------------------------------------------------------------------------------------------------------------------------------------------------------------------------------------------------------------------------------------------------------------------------------------------------------------------------------------------------------------------------------------------------------------------------------------------------------------------------------------------------------------------------------------------------------------------------------------------------------------------------------------------------------------------------------------------------------------------------------------------------------------------------------------------------------------------------------------------------------------------------------------------------------------------------------------------------------------------------------------------------------------------------------------------------------------------------------------------------------------------------------------------------------------------------------------------------------------------------------------------------------------------------------------------------------------------------------------------------------------------------------------------------------------------------------------------------------------------------------------------------------------------------------------------------------------------------------------------------------------------------------------------------------------------------------------------------------------------------------------------------------------------------------------------------------------------------------------------------------------------------------------------------------------------------------------------------------------------------------------------------------------------------------------------------------------------------------------------------------------------------------------------------------------------------------------------------------------------------------------------------------------------------------------------------------------------------------------------------|--------------------------------------------------------------------------------------------|------------------------------------------------------------------------------------------------------------|---------------------------------------------------------------------------------------------------------------------------------------------------------------------------------------------------------------------------------------------------------------------------------------------------------------------------------------------------------------------------------------------------------------------------------------------------------------------------|
|                                                                                                                                                                                                                                                                                                                                                                                                                                                                                                                                                                                                                                                                                                                                                                                                                                                                                                                                                                                                                                                                                                                                                                                                                                                                                                                                                                                                                                                                                                                                                                                                                                                                                                                                                                                                                                                                                                                                                                                                                                                                                                                                                                                                                                                                                                                                                                                                                                                                                                                                                                                                                                                                                                                                                                                                                                                                                                                                                                        |                                                                                            |                                                                                                            | Noemie Santamaria de Souza, Niko Beerenwinkel, Tanja Stadler                                                                                                                                                                                                                                                                                                                                                                                                              |
| EPI_ISL_1129587                                                                                                                                                                                                                                                                                                                                                                                                                                                                                                                                                                                                                                                                                                                                                                                                                                                                                                                                                                                                                                                                                                                                                                                                                                                                                                                                                                                                                                                                                                                                                                                                                                                                                                                                                                                                                                                                                                                                                                                                                                                                                                                                                                                                                                                                                                                                                                                                                                                                                                                                                                                                                                                                                                                                                                                                                                                                                                                                                        | Viollier AG                                                                                | Department of Biosystems Science and Engineering, ETH Zürich                                               | Chaoran Chen, Sarah Nadeau, Catharine Aquino, Ivan Topolsky, Philipp Jablonski, Lara Fuhrmann, David Dreifuss, Katharina Jahn, Andreia Cabral de Gouvea, Maria Domenica Moccia, Simon Grütter, Timothy Sykes, Lennart Opitz, Griffin White, Laura Neff, Doris Popovic, Andrea Patrignani, Jay Tracy, Ralph Schlapbach, Christiane Beckmann, Maurice Redondo, Olivier Kobel, Christoph Noppen, Sophie Seidel, Noemie Santamaria de Souza, Niko Beerenwinkel, Tanja Stadler |
| EPI_ISL_1129936, EPI_ISL_1129938, EPI_ISL_1130045, EPI_ISL_1130111, EPI_ISL_1130203                                                                                                                                                                                                                                                                                                                                                                                                                                                                                                                                                                                                                                                                                                                                                                                                                                                                                                                                                                                                                                                                                                                                                                                                                                                                                                                                                                                                                                                                                                                                                                                                                                                                                                                                                                                                                                                                                                                                                                                                                                                                                                                                                                                                                                                                                                                                                                                                                                                                                                                                                                                                                                                                                                                                                                                                                                                                                    | Viollier AG                                                                                | Department of Biosystems Science and Engineering, ETH Zürich                                               | Christian Beisel, Sarah Nadeau, Chaoran Chen, Ivan Topolsky, Philipp Jablonski, Lara Fuhrmann, David Dreifuss, Katharina Jahn, Rebecca Denes, Mirjam Feldkamp, Ina Nissen, Natascha Santacroce, Elodie Burcklen, Christiane Beckmann, Maurice Redondo, Olivier Kobel, Christoph Noppen, Sophie Seidel, Noemie Santamaria de Souza, Niko Beerenwinkel, Tanja Stadler                                                                                                       |
| EPI_ISL_1130220                                                                                                                                                                                                                                                                                                                                                                                                                                                                                                                                                                                                                                                                                                                                                                                                                                                                                                                                                                                                                                                                                                                                                                                                                                                                                                                                                                                                                                                                                                                                                                                                                                                                                                                                                                                                                                                                                                                                                                                                                                                                                                                                                                                                                                                                                                                                                                                                                                                                                                                                                                                                                                                                                                                                                                                                                                                                                                                                                        | Viollier AG                                                                                | Department of Biosystems Science and Engineering, ETH Zürich                                               | Chaoran Chen, Sarah Nadeau, Catharine Aquino, Ivan Topolsky, Philipp Jablonski, Lara Fuhrmann, David Dreifuss, Katharina Jahn, Andreia Cabral de Gouvea, Maria Domenica Moccia, Simon Grütter, Timothy Sykes, Lennart Opitz, Griffin White, Laura Neff, Doris Popovic, Andrea Patrignani, Jay Tracy, Ralph Schlapbach, Christiane Beckmann, Maurice Redondo, Olivier Kobel, Christoph Noppen, Sophie Seidel, Noemie Santamaria de Souza, Niko Beerenwinkel, Tanja Stadler |
| EPI_ISL_1130724                                                                                                                                                                                                                                                                                                                                                                                                                                                                                                                                                                                                                                                                                                                                                                                                                                                                                                                                                                                                                                                                                                                                                                                                                                                                                                                                                                                                                                                                                                                                                                                                                                                                                                                                                                                                                                                                                                                                                                                                                                                                                                                                                                                                                                                                                                                                                                                                                                                                                                                                                                                                                                                                                                                                                                                                                                                                                                                                                        | Viollier AG                                                                                | Department of Biosystems Science and Engineering, ETH Zürich                                               | Christian Beisel, Sarah Nadeau, Chaoran Chen, Ivan Topolsky, Philipp Jablonski, Lara Fuhrmann, David Dreifuss, Katharina Jahn, Rebecca Denes, Mirjam Feldkamp, Ina Nissen, Natascha Santacroce, Elodie Burcklen, Christiane Beckmann, Maurice Redondo, Olivier Kobel, Christoph Noppen, Sophie Seidel, Noemie Santamaria de Souza, Niko Beerenwinkel, Tanja Stadler                                                                                                       |
| EPI_ISL_1130791, EPI_ISL_1130804, EPI_ISL_1131003                                                                                                                                                                                                                                                                                                                                                                                                                                                                                                                                                                                                                                                                                                                                                                                                                                                                                                                                                                                                                                                                                                                                                                                                                                                                                                                                                                                                                                                                                                                                                                                                                                                                                                                                                                                                                                                                                                                                                                                                                                                                                                                                                                                                                                                                                                                                                                                                                                                                                                                                                                                                                                                                                                                                                                                                                                                                                                                      | Viollier AG                                                                                | Department of Biosystems Science and Engineering, ETH Zürich                                               | Chaoran Chen, Sarah Nadeau, Catharine Aquino, Ivan Topolsky, Philipp Jablonski, Lara Fuhrmann, David Dreifuss, Katharina Jahn, Andreia Cabral de Gouvea, Maria Domenica Moccia, Simon Grütter, Timothy Sykes, Lennart Opitz, Griffin White, Laura Neff, Doris Popovic, Andrea Patrignani, Jay Tracy, Ralph Schlapbach, Christiane Beckmann, Maurice Redondo, Olivier Kobel, Christoph Noppen, Sophie Seidel, Noemie Santamaria de Souza, Niko Beerenwinkel, Tanja Stadler |
| EPI_ISL_1131145, EPI_ISL_1131155, EPI_ISL_1131156, EPI_ISL_1131159, EPI_ISL_1131160, EPI_ISL_1131178, EPI_ISL_1131179, EPI_ISL_1131180, EPI_ISL_1131181, EPI_ISL_1131182, EPI_ISL_1131183, EPI_ISL_1131184, EPI_ISL_1131185, EPI_ISL_1131190, EPI_ISL_1131191, EPI_ISL_1131192, EPI_ISL_1131193, EPI_ISL_1131194, EPI_ISL_1131195, EPI_ISL_1131196, EPI_ISL_1131197, EPI_ISL_1131198, EPI_ISL_1131199, EPI_ISL_1131200, EPI_ISL_1131201, EPI_ISL_1131202, EPI_ISL_1131203, EPI_ISL_1131204, EPI_ISL_1131205, EPI_ISL_1131206, EPI_ISL_1131207, EPI_ISL_1131208, EPI_ISL_1131209, EPI_ISL_1131210, EPI_ISL_1131211, EPI_ISL_1131212, EPI_ISL_1131213, EPI_ISL_1131214, EPI_ISL_1131215, EPI_ISL_1131225, EPI_ISL_1131226, EPI_ISL_1131227, EPI_ISL_1131228, EPI_ISL_1131229, EPI_ISL_1131230, EPI_ISL_1131231, EPI_ISL_1131232, EPI_ISL_1131233, EPI_ISL_1131234, EPI_ISL_1131235, EPI_ISL_1131236, EPI_ISL_1131237, EPI_ISL_1131238, EPI_ISL_1131239, EPI_ISL_1131240, EPI_ISL_1131241, EPI_ISL_1131242, EPI_ISL_1131243, EPI_ISL_1131244, EPI_ISL_1131245, EPI_ISL_1131246, EPI_ISL_1131247, EPI_ISL_1131248, EPI_ISL_1131249, EPI_ISL_1131380, EPI_ISL_1131612, EPI_ISL_1131613, EPI_ISL_1131614, EPI_ISL_1131615, EPI_ISL_1131616, EPI_ISL_1131617, EPI_ISL_1131618, EPI_ISL_1131619, EPI_ISL_1131620, EPI_ISL_1131621, EPI_ISL_1131622, EPI_ISL_1131623, EPI_ISL_1131624, EPI_ISL_1131625, EPI_ISL_1131626, EPI_ISL_1131627, EPI_ISL_1131628, EPI_ISL_1131629, EPI_ISL_1131630, EPI_ISL_1131631, EPI_ISL_1131632, EPI_ISL_1131633, EPI_ISL_1131634, EPI_ISL_1131635, EPI_ISL_1131636, EPI_ISL_1131637, EPI_ISL_1131638, EPI_ISL_1131639, EPI_ISL_1131640, EPI_ISL_1131641, EPI_ISL_1131642, EPI_ISL_1131643, EPI_ISL_1131644, EPI_ISL_1131645, EPI_ISL_1131646, EPI_ISL_1131647, EPI_ISL_1131648, EPI_ISL_1131649, EPI_ISL_1131650, EPI_ISL_1131651, EPI_ISL_1131652, EPI_ISL_1131653, EPI_ISL_1131654, EPI_ISL_1131655, EPI_ISL_1131656, EPI_ISL_1131657, EPI_ISL_1131658, EPI_ISL_1131659, EPI_ISL_1131660, EPI_ISL_1131661, EPI_ISL_1131662, EPI_ISL_1131663, EPI_ISL_1131664, EPI_ISL_1131665, EPI_ISL_1131666, EPI_ISL_1131667, EPI_ISL_1131668, EPI_ISL_1131669, EPI_ISL_1131670, EPI_ISL_1131671, EPI_ISL_1131672, EPI_ISL_1131673, EPI_ISL_1131674, EPI_ISL_1131675, EPI_ISL_1131676, EPI_ISL_1131677, EPI_ISL_1131678, EPI_ISL_1131679, EPI_ISL_1131680, EPI_ISL_1131681, EPI_ISL_1131682, EPI_ISL_1131683, EPI_ISL_1131684, EPI_ISL_1131685, EPI_ISL_1131686, EPI_ISL_1131687, EPI_ISL_1131688, EPI_ISL_1131689, EPI_ISL_1131690, EPI_ISL_1131691, EPI_ISL_1131692, EPI_ISL_1131693, EPI_ISL_1131694, EPI_ISL_1131695, EPI_ISL_1131696, EPI_ISL_1131697, EPI_ISL_1131698, EPI_ISL_1131699, EPI_ISL_1131700, EPI_ISL_1131701, EPI_ISL_1131702, EPI_ISL_1131703, EPI_ISL_1131704, EPI_ISL_1131705, EPI_ISL_1131706, EPI_ISL_1131707, EPI_ISL_1131708, EPI_ISL_1131709, EPI_ISL_1131710, EPI_ISL_1131711, EPI_ISL_1131712, EPI_ISL_1131713, EPI_ISL_1131714 |                                                                                            |                                                                                                            |                                                                                                                                                                                                                                                                                                                                                                                                                                                                           |
| see above                                                                                                                                                                                                                                                                                                                                                                                                                                                                                                                                                                                                                                                                                                                                                                                                                                                                                                                                                                                                                                                                                                                                                                                                                                                                                                                                                                                                                                                                                                                                                                                                                                                                                                                                                                                                                                                                                                                                                                                                                                                                                                                                                                                                                                                                                                                                                                                                                                                                                                                                                                                                                                                                                                                                                                                                                                                                                                                                                              | Pathogen Genomics Center, National Institute of Infectious Diseases                        | Pathogen Genomics Center, National Institute of Infectious Diseases                                        | Tsuyoshi Sekizuka, Kentaro Itokawa, Rina Tanaka, Masanori Hashino, Makoto Kuroda                                                                                                                                                                                                                                                                                                                                                                                          |
| EPI_ISL_1132648                                                                                                                                                                                                                                                                                                                                                                                                                                                                                                                                                                                                                                                                                                                                                                                                                                                                                                                                                                                                                                                                                                                                                                                                                                                                                                                                                                                                                                                                                                                                                                                                                                                                                                                                                                                                                                                                                                                                                                                                                                                                                                                                                                                                                                                                                                                                                                                                                                                                                                                                                                                                                                                                                                                                                                                                                                                                                                                                                        | Arizona State Public Health Laboratory                                                     | Arizona State Public Health Laboratory                                                                     | Trung Huynh, Jessica Escobar, Katherine Fullerton, Nobuko Fukushima, Stacy White, Linda Getsinger, Victor Waddell                                                                                                                                                                                                                                                                                                                                                         |
| EPI_ISL_1132971, EPI_ISL_1132973, EPI_ISL_1132975, EPI_ISL_1132978, EPI_ISL_1132987, EPI_ISL_1132988, EPI_ISL_1132990, EPI_ISL_1132992, EPI_ISL_1132998, EPI_ISL_1133001, EPI_ISL_1133003, EPI_ISL_1133004, EPI_ISL_1133005, EPI_ISL_1133006, EPI_ISL_1133014, EPI_ISL_1133017, EPI_ISL_1133018, EPI_ISL_1133019, EPI_ISL_1133020, EPI_ISL_1133021, EPI_ISL_1133022, EPI_ISL_1133023, EPI_ISL_1133027, EPI_ISL_1133028, EPI_ISL_1133030, EPI_ISL_1133033, EPI_ISL_1133035, EPI_ISL_1133038, EPI_ISL_1133039, EPI_ISL_1133040, EPI_ISL_1133041, EPI_ISL_1133042, EPI_ISL_1133044, EPI_ISL_1133045, EPI_ISL_1133047, EPI_ISL_1133048, EPI_ISL_1133049, EPI_ISL_1133051, EPI_ISL_1133052, EPI_ISL_1133053, EPI_ISL_1133057, EPI_ISL_1133058, EPI_ISL_1133059, EPI_ISL_1133062, EPI_ISL_1133063, EPI_ISL_1133067, EPI_ISL_1133068, EPI_ISL_1133069, EPI_ISL_1133070, EPI_ISL_1133071, EPI_ISL_1133072, EPI_ISL_1133073, EPI_ISL_1133074, EPI_ISL_1133076, EPI_ISL_1133077, EPI_ISL_1133078, EPI_ISL_1133079, EPI_ISL_1133080, EPI_ISL_1133082, EPI_ISL_1133083, EPI_ISL_1133084, EPI_ISL_1133085, EPI_ISL_1133086, EPI_ISL_1133087, EPI_ISL_1133089, EPI_ISL_1133090, EPI_ISL_1133091, EPI_ISL_1133092, EPI_ISL_1133093, EPI_ISL_1133094, EPI_ISL_1133095, EPI_ISL_1133096, EPI_ISL_1133097, EPI_ISL_1133098, EPI_ISL_1133099                                                                                                                                                                                                                                                                                                                                                                                                                                                                                                                                                                                                                                                                                                                                                                                                                                                                                                                                                                                                                                                                                                                                                                                                                                                                                                                                                                                                                                                                                                                                                                                                                                              | University of Michigan Clinical Microbiology Laboratory                                    | Lauring Lab, University of Michigan, Department of Microbiology and Immunology                             | Valesano                                                                                                                                                                                                                                                                                                                                                                                                                                                                  |
| EPI_ISL_1133222                                                                                                                                                                                                                                                                                                                                                                                                                                                                                                                                                                                                                                                                                                                                                                                                                                                                                                                                                                                                                                                                                                                                                                                                                                                                                                                                                                                                                                                                                                                                                                                                                                                                                                                                                                                                                                                                                                                                                                                                                                                                                                                                                                                                                                                                                                                                                                                                                                                                                                                                                                                                                                                                                                                                                                                                                                                                                                                                                        | Arizona State Public Health Laboratory                                                     | Arizona State Public Health Laboratory                                                                     | Trung Huynh, Jessica Escobar, Katherine Fullerton, Nobuko Fukushima, Stacy White, Linda Getsinger, Victor Waddell                                                                                                                                                                                                                                                                                                                                                         |
| EPI_ISL_1137039, EPI_ISL_1137040, EPI_ISL_1137044, EPI_ISL_1137047                                                                                                                                                                                                                                                                                                                                                                                                                                                                                                                                                                                                                                                                                                                                                                                                                                                                                                                                                                                                                                                                                                                                                                                                                                                                                                                                                                                                                                                                                                                                                                                                                                                                                                                                                                                                                                                                                                                                                                                                                                                                                                                                                                                                                                                                                                                                                                                                                                                                                                                                                                                                                                                                                                                                                                                                                                                                                                     | Delaware Public Health Lab                                                                 | Delaware Public Health Lab                                                                                 | Gregory Hovan                                                                                                                                                                                                                                                                                                                                                                                                                                                             |
| EPI_ISL_1137173, EPI_ISL_1137209, EPI_ISL_1137210, EPI_ISL_1137211, EPI_ISL_1137212, EPI_ISL_1137213, EPI_ISL_1137214, EPI_ISL_1137215, EPI_ISL_1137216, EPI_ISL_1137217, EPI_ISL_1137218, EPI_ISL_1137219, EPI_ISL_1137221, EPI_ISL_1137222, EPI_ISL_1137223, EPI_ISL_1137224, EPI_ISL_1137225, EPI_ISL_1137226, EPI_ISL_1137227, EPI_ISL_1137229, EPI_ISL_1137230, EPI_ISL_1137231, EPI_ISL_1137232, EPI_ISL_1137233, EPI_ISL_1137234, EPI_ISL_1137235, EPI_ISL_1137236, EPI_ISL_1137237, EPI_ISL_1137238                                                                                                                                                                                                                                                                                                                                                                                                                                                                                                                                                                                                                                                                                                                                                                                                                                                                                                                                                                                                                                                                                                                                                                                                                                                                                                                                                                                                                                                                                                                                                                                                                                                                                                                                                                                                                                                                                                                                                                                                                                                                                                                                                                                                                                                                                                                                                                                                                                                            |                                                                                            |                                                                                                            |                                                                                                                                                                                                                                                                                                                                                                                                                                                                           |
| see above                                                                                                                                                                                                                                                                                                                                                                                                                                                                                                                                                                                                                                                                                                                                                                                                                                                                                                                                                                                                                                                                                                                                                                                                                                                                                                                                                                                                                                                                                                                                                                                                                                                                                                                                                                                                                                                                                                                                                                                                                                                                                                                                                                                                                                                                                                                                                                                                                                                                                                                                                                                                                                                                                                                                                                                                                                                                                                                                                              | UPMC Clinical Microbiology Laboratory                                                      | Microbial Genome Sequencing Center; Microbial Genomic Epidemiology Laboratory, University of Pittsburgh    | Lee H. Harrison, Jane W. Marsh, Marissa P. Griffith, Stephanie L. Mitchell, Vatsala R. Srinivasa, Kady D. Waggle, Daniel J. Snyder, Vaughn S. Cooper                                                                                                                                                                                                                                                                                                                      |
| EPI_ISL_1137479, EPI_ISL_1137480, EPI_ISL_1137481, EPI_ISL_1137482, EPI_ISL_1137483, EPI_ISL_1137484, EPI_ISL_1137485, EPI_ISL_1137486, EPI_ISL_1137487, EPI_ISL_1137488, EPI_ISL_1137489, EPI_ISL_1137490, EPI_ISL_1137491                                                                                                                                                                                                                                                                                                                                                                                                                                                                                                                                                                                                                                                                                                                                                                                                                                                                                                                                                                                                                                                                                                                                                                                                                                                                                                                                                                                                                                                                                                                                                                                                                                                                                                                                                                                                                                                                                                                                                                                                                                                                                                                                                                                                                                                                                                                                                                                                                                                                                                                                                                                                                                                                                                                                            |                                                                                            |                                                                                                            |                                                                                                                                                                                                                                                                                                                                                                                                                                                                           |
| see above                                                                                                                                                                                                                                                                                                                                                                                                                                                                                                                                                                                                                                                                                                                                                                                                                                                                                                                                                                                                                                                                                                                                                                                                                                                                                                                                                                                                                                                                                                                                                                                                                                                                                                                                                                                                                                                                                                                                                                                                                                                                                                                                                                                                                                                                                                                                                                                                                                                                                                                                                                                                                                                                                                                                                                                                                                                                                                                                                              | Laboratorio de Referencia Nacional de Virus Respiratorio. Instituto Nacional de Salud Perú | Laboratorio de Referencia Nacional de Biotecnología y Biología Molecular. Instituto Nacional de Salud Perú | Carlos Padilla Rojas, Karolyn Vega Chozo, Luis Barcena, Priscila Lope Pari, Omar Caceres Rey, Marco Galarza Perez, Maribel Huaringa Nuñez, Johanna Balbuena Torrez, Henri Bailon Calderon, Nancy Rojas Serrano                                                                                                                                                                                                                                                            |
| EPI_ISL_1138510                                                                                                                                                                                                                                                                                                                                                                                                                                                                                                                                                                                                                                                                                                                                                                                                                                                                                                                                                                                                                                                                                                                                                                                                                                                                                                                                                                                                                                                                                                                                                                                                                                                                                                                                                                                                                                                                                                                                                                                                                                                                                                                                                                                                                                                                                                                                                                                                                                                                                                                                                                                                                                                                                                                                                                                                                                                                                                                                                        | Illinois Department of Public Health                                                       | Gagnon Lab, Southern Illinois University                                                                   | Keith Gagnon                                                                                                                                                                                                                                                                                                                                                                                                                                                              |
| EPI_ISL_1138600, EPI_ISL_1138601, EPI_ISL_1138602, EPI_ISL_1138603, EPI_ISL_1138604, EPI_ISL_1138607, EPI_ISL_1138608, EPI_ISL_1138609, EPI_ISL_1138610, EPI_ISL_1138611, EPI_ISL_1138615, EPI_ISL_1138616, EPI_ISL_1138617, EPI_ISL_1138621, EPI_ISL_1138622, EPI_ISL_1138623, EPI_ISL_1138624, EPI_ISL_1138625, EPI_ISL_1138628, EPI_ISL_1138629, EPI_ISL_1138630, EPI_ISL_1138632, EPI_ISL_1138635, EPI_ISL_1138636, EPI_ISL_1138637, EPI_ISL_1138638, EPI_ISL_1138639, EPI_ISL_1138640, EPI_ISL_1138643, EPI_ISL_1138644, EPI_ISL_1138645, EPI_ISL_1138646, EPI_ISL_1138647, EPI_ISL_1138651, EPI_ISL_1138653, EPI_ISL_1138654, EPI_ISL_1138657, EPI_ISL_1138658, EPI_ISL_1138659, EPI_ISL_1138660, EPI_ISL_1138664, EPI_ISL_1138665, EPI_ISL_1138666, EPI_ISL_1138667, EPI_ISL_1138671, EPI_ISL_1138672, EPI_ISL_1138673, EPI_ISL_1138674, EPI_ISL_1138677, EPI_ISL_1138678, EPI_ISL_1138679, EPI_ISL_1138681                                                                                                                                                                                                                                                                                                                                                                                                                                                                                                                                                                                                                                                                                                                                                                                                                                                                                                                                                                                                                                                                                                                                                                                                                                                                                                                                                                                                                                                                                                                                                                                                                                                                                                                                                                                                                                                                                                                                                                                                                                                     |                                                                                            |                                                                                                            |                                                                                                                                                                                                                                                                                                                                                                                                                                                                           |
| see above                                                                                                                                                                                                                                                                                                                                                                                                                                                                                                                                                                                                                                                                                                                                                                                                                                                                                                                                                                                                                                                                                                                                                                                                                                                                                                                                                                                                                                                                                                                                                                                                                                                                                                                                                                                                                                                                                                                                                                                                                                                                                                                                                                                                                                                                                                                                                                                                                                                                                                                                                                                                                                                                                                                                                                                                                                                                                                                                                              | Institut für Medizinische Virologie, Universitätsklinikum Frankfurt                        | Institut für Medizinische Virologie, Universitätsklinikum Frankfurt                                        | Barbara Muehleemann et al                                                                                                                                                                                                                                                                                                                                                                                                                                                 |
| EPI_ISL_1140353, EPI_ISL_1140355, EPI_ISL_1140356, EPI_ISL_1140359, EPI_ISL_1140362, EPI_ISL_1140364, EPI_ISL_1140365                                                                                                                                                                                                                                                                                                                                                                                                                                                                                                                                                                                                                                                                                                                                                                                                                                                                                                                                                                                                                                                                                                                                                                                                                                                                                                                                                                                                                                                                                                                                                                                                                                                                                                                                                                                                                                                                                                                                                                                                                                                                                                                                                                                                                                                                                                                                                                                                                                                                                                                                                                                                                                                                                                                                                                                                                                                  | Labor ZOTZ KLIMAS; MVZ Düsseldorf-Centrum                                                  | Robert Koch Institute                                                                                      | unknown                                                                                                                                                                                                                                                                                                                                                                                                                                                                   |
| EPI_ISL_1141013, EPI_ISL_1141015                                                                                                                                                                                                                                                                                                                                                                                                                                                                                                                                                                                                                                                                                                                                                                                                                                                                                                                                                                                                                                                                                                                                                                                                                                                                                                                                                                                                                                                                                                                                                                                                                                                                                                                                                                                                                                                                                                                                                                                                                                                                                                                                                                                                                                                                                                                                                                                                                                                                                                                                                                                                                                                                                                                                                                                                                                                                                                                                       | Labor Kneißler GmbH & Co. KG                                                               | Robert Koch Institute                                                                                      | unknown                                                                                                                                                                                                                                                                                                                                                                                                                                                                   |
| EPI_ISL_1143958                                                                                                                                                                                                                                                                                                                                                                                                                                                                                                                                                                                                                                                                                                                                                                                                                                                                                                                                                                                                                                                                                                                                                                                                                                                                                                                                                                                                                                                                                                                                                                                                                                                                                                                                                                                                                                                                                                                                                                                                                                                                                                                                                                                                                                                                                                                                                                                                                                                                                                                                                                                                                                                                                                                                                                                                                                                                                                                                                        | Bayerisches Landesamt für Gesundheit und Lebensmittelsicherheit (LGL)                      | Robert Koch Institute                                                                                      | unknown                                                                                                                                                                                                                                                                                                                                                                                                                                                                   |
| EPI_ISL_1144913, EPI_ISL_1144914, EPI_ISL_1144915, EPI_ISL_1144917, EPI_ISL_1144918, EPI_ISL_1144919, EPI_ISL_1144920, EPI_ISL_1144921, EPI_ISL_1144922                                                                                                                                                                                                                                                                                                                                                                                                                                                                                                                                                                                                                                                                                                                                                                                                                                                                                                                                                                                                                                                                                                                                                                                                                                                                                                                                                                                                                                                                                                                                                                                                                                                                                                                                                                                                                                                                                                                                                                                                                                                                                                                                                                                                                                                                                                                                                                                                                                                                                                                                                                                                                                                                                                                                                                                                                | Medizinische Hochschule Hannover Institut für Virologie                                    | Robert Koch Institute                                                                                      | unknown                                                                                                                                                                                                                                                                                                                                                                                                                                                                   |
| EPI_ISL_1159071, EPI_ISL_1159072, EPI_ISL_1159073, EPI_ISL_1159074, EPI_ISL_1159075, EPI_ISL_1159076, EPI_ISL_1159077, EPI_ISL_1159078, EPI_ISL_1159079, EPI_ISL_1159080, EPI_ISL_1159083, EPI_ISL_1159085, EPI_ISL_1159087, EPI_ISL_1159089, EPI_ISL_1159091, EPI_ISL_1159092, EPI_ISL_1159096, EPI_ISL_1159102                                                                                                                                                                                                                                                                                                                                                                                                                                                                                                                                                                                                                                                                                                                                                                                                                                                                                                                                                                                                                                                                                                                                                                                                                                                                                                                                                                                                                                                                                                                                                                                                                                                                                                                                                                                                                                                                                                                                                                                                                                                                                                                                                                                                                                                                                                                                                                                                                                                                                                                                                                                                                                                       |                                                                                            |                                                                                                            |                                                                                                                                                                                                                                                                                                                                                                                                                                                                           |
| see above                                                                                                                                                                                                                                                                                                                                                                                                                                                                                                                                                                                                                                                                                                                                                                                                                                                                                                                                                                                                                                                                                                                                                                                                                                                                                                                                                                                                                                                                                                                                                                                                                                                                                                                                                                                                                                                                                                                                                                                                                                                                                                                                                                                                                                                                                                                                                                                                                                                                                                                                                                                                                                                                                                                                                                                                                                                                                                                                                              | Department of Health Technology and Informatics, The Hong Kong Polytechnic University      | Department of Health Technology and Informatics, The Hong Kong Polytechnic University                      | Gilman Kit-Hang Siu, Lam-Kwong Lee, Kenneth Siu-Sing Leung, Jake Siu-Lun Leung, Timothy Ting-Leung Ng, Chloe Toi-Mei Chan, Kingsley King-Gee Tam, Hiu-Yin Lao, Denise Sze-Hang Wong, Alan Ka-Lun Wu, Miranda Chong-Yee Yau, Yvette Wai-Man Lai, Kitty Sau-Chun Fung, Sandy Ka-Yee Chau, Barry Kin-Chung Wong, Wing-Kin To, Kristine Luk, Alex Yat-Man Ho, Tak-Lun Que, Kam-Tong Yip, Wing Cheong Yam, David Ho-Keung Shum, Shea Ping Yip                                  |



|                                                                                                                                                                                                                                                                                                |                                                                                                           |                                                                                                                            |                                                                                                                                                                                                                                                                                                                                                                                                                                                                                                                                                                                                          |
|------------------------------------------------------------------------------------------------------------------------------------------------------------------------------------------------------------------------------------------------------------------------------------------------|-----------------------------------------------------------------------------------------------------------|----------------------------------------------------------------------------------------------------------------------------|----------------------------------------------------------------------------------------------------------------------------------------------------------------------------------------------------------------------------------------------------------------------------------------------------------------------------------------------------------------------------------------------------------------------------------------------------------------------------------------------------------------------------------------------------------------------------------------------------------|
| EPI_ISL_1159175                                                                                                                                                                                                                                                                                | HOSPITAL CLINIC                                                                                           | Instituto de Salud Carlos III                                                                                              | Sandonis,V. Vázquez-Morón, S. Iglesias-Caballero, M. Camarero, S. Pozo, F. Casas, I. Jiménez, P. Zaballos, A. Monzón, S. Varona, S. Cuesta, I. VILA ESTAPE, JORDI                                                                                                                                                                                                                                                                                                                                                                                                                                        |
| EPI_ISL_1159386                                                                                                                                                                                                                                                                                | Siti Khodijah Hospital                                                                                    | Institute of Tropical Disease, Universitas Airlangga                                                                       | Krisnoadi Rahardjo, Aldise M Nastri, Jezzy R Dewantari, Rima R Prasetya, Muhammad Hamdan, Gatot Soegiarto, Laksmi Wulandari, Resti Yudhawati, Yasuko Mori, Soetjipto, Kazufumi Shimizu, Maria I Lusida                                                                                                                                                                                                                                                                                                                                                                                                   |
| EPI_ISL_1159387                                                                                                                                                                                                                                                                                | Adi Husada Kapasari Hospital                                                                              | Institute of Tropical Disease, Universitas Airlangga                                                                       | Maria I Lusida, Krisnoadi Rahardjo, Aldise M Nastri, Jezzy R Dewantari, Rima R Prasetya, Hermanto Wijaya, Gatot Soegiarto, Laksmi Wulandari, Resti Yudhawati, Soetjipto, Yasuko Mori, Kazufumi Shimizu                                                                                                                                                                                                                                                                                                                                                                                                   |
| EPI_ISL_1159388                                                                                                                                                                                                                                                                                | Paru Hospital                                                                                             | Institute of Tropical Disease, Universitas Airlangga                                                                       | Aldise M Nastri, Jezzy R Dewantari, Rima R Prasetya, Krisnoadi Rahardjo, Dyah Retno, Gatot Soegiarto, Laksmi Wulandari, Resti Yudhawati, Soetjipto, Yasuko Mori, Maria I Lusida, Kazufumi Shimizu                                                                                                                                                                                                                                                                                                                                                                                                        |
| EPI_ISL_1159389                                                                                                                                                                                                                                                                                | Darmo Hospital                                                                                            | Institute of Tropical Disease, Universitas Airlangga                                                                       | Jezzy R Dewantari, Rima R Prasetya, Krisnoadi Rahardjo, Aldise M Nastri, Sulung Budianto, Gatot Soegiarto, Laksmi Wulandari, Resti Yudhawati, Soetjipto, Yasuko Mori, Maria I Lusida, Kazufumi Shimizu                                                                                                                                                                                                                                                                                                                                                                                                   |
| EPI_ISL_1160138, EPI_ISL_1160148, EPI_ISL_1160152, EPI_ISL_1160155, EPI_ISL_1160157, EPI_ISL_1160161, EPI_ISL_1160174, EPI_ISL_1160182                                                                                                                                                         | Center of Medical Microbiology, Virology, and Hospital Hygiene, University of Duesseldorf                 | Center of Medical Microbiology, Virology, and Hospital Hygiene, University of Duesseldorf                                  | Maximilian Damagnez;Alexander Dilthey;Torsten Houwaart;Lisanna Hülse;Malte Kohns Vasconcelos;Nadine Lübke;Jessica Nicolai;Klaus Pfeffer;Daniel Strelow;Jörg Timm;Andreas Walker;Tobias Wienemann                                                                                                                                                                                                                                                                                                                                                                                                         |
| EPI_ISL_1163832, EPI_ISL_1163833, EPI_ISL_1163834, EPI_ISL_1163838, EPI_ISL_1163842, EPI_ISL_1163843, EPI_ISL_1163845                                                                                                                                                                          | Microbiology and Virology Unit, Azienda Ospedale Padova, Padova, Italy                                    | Department of Molecular Medicine, Computational Medicine Group, Univeresity of Padova, Padova, Italy                       | Elisa Franchin, Claudia Del Vecchio, Francesco Onelia, Stefano Toppo, Enrico Lavezzo, Laura Manuto, Federico Bianca , Marco Grazioli, Andrea Crisanti                                                                                                                                                                                                                                                                                                                                                                                                                                                    |
| EPI_ISL_1164686, EPI_ISL_1164687, EPI_ISL_1164688, EPI_ISL_1164689, EPI_ISL_1164691, EPI_ISL_1164692, EPI_ISL_1164693, EPI_ISL_1164694, EPI_ISL_1164695, EPI_ISL_1164696, EPI_ISL_1164697, EPI_ISL_1164698                                                                                     |                                                                                                           |                                                                                                                            |                                                                                                                                                                                                                                                                                                                                                                                                                                                                                                                                                                                                          |
| see above                                                                                                                                                                                                                                                                                      | Department of Molecular Virology, Cyprus Institute of Neurology and Genetics                              | Department of Molecular Virology, Cyprus Institute of Neurology and Genetics                                               | Jan Richter, Pavlos Fanis, Christina Tryfonos, Dana Koptides, George Krashias, Stavros Bashiardes, Andreas Hadjisavvas, Maria Loizidou, Anastasis Oulas, Denise Alexandrou, Olga Kalakouta, Mihalis Panayiotidis, George Spyrou, Christina Christodoulou                                                                                                                                                                                                                                                                                                                                                 |
| EPI_ISL_1164931                                                                                                                                                                                                                                                                                | Ohio Department of Health Laboratory                                                                      | Ohio Department of Health Laboratory                                                                                       | Holmes, Jennifer; Eric Brandt, Keoni Omura, Glen McGillivray, Caitlin McDonnell, Jade Mowery, Stephanie Mccracken, Tyler Payne, Kirtana Ramadugu, Erica Leasure, Brent Lee, Kelsey Florek, Heather Blankenship, Allison Black, Quanta Brown, and Tammy Bannerman                                                                                                                                                                                                                                                                                                                                         |
| EPI_ISL_1165079, EPI_ISL_1165080                                                                                                                                                                                                                                                               | Medical Ain Shams Research Institute (MASRI), Ain Shams University                                        | Medical Ain Shams Research Institute (MASRI), Ain Shams University                                                         | Hesham Elghazaly, Sara Hassan Agwa, Hala Hafez , Fatma Ebied, Manal Hamdy Elsaid, Mohamed Elhadidi, Aya Mohamed , Shima Moustafa, Reham Kassab, Iman Foda , Samia Abdou Girgis, Hoda Ezz Elarab, Hagar Elshora, Osama Mansour.                                                                                                                                                                                                                                                                                                                                                                           |
| EPI_ISL_1165442                                                                                                                                                                                                                                                                                | Ohio Department of Health Laboratory                                                                      | Ohio Department of Health Laboratory                                                                                       | Holmes, Jennifer; Eric Brandt, Keoni Omura, Glen McGillivray, Caitlin McDonnell, Jade Mowery, Stephanie Mccracken, Tyler Payne, Kirtana Ramadugu, Erica Leasure, Brent Lee, Kelsey Florek, Heather Blankenship, Allison Black, Quanta Brown, and Tammy Bannerman                                                                                                                                                                                                                                                                                                                                         |
| EPI_ISL_1167040, EPI_ISL_1167041, EPI_ISL_1167042, EPI_ISL_1167043, EPI_ISL_1167044, EPI_ISL_1167045, EPI_ISL_1167050, EPI_ISL_1167052, EPI_ISL_1167056, EPI_ISL_1167058, EPI_ISL_1167061, EPI_ISL_1167063                                                                                     |                                                                                                           |                                                                                                                            |                                                                                                                                                                                                                                                                                                                                                                                                                                                                                                                                                                                                          |
| see above                                                                                                                                                                                                                                                                                      | "Dr. Andrija Stampar" Teaching Institute of Public Health, Department of Clinical Microbiology            | Istituto di Genomica Applicata                                                                                             | Jasmina Vranes, Slobodanka Radovic, Fedrica Cattonaro, Irena Jurman, Vera Vendramin, Gabriele Magris, Eleonora Paparelli, Davide Scaglione, Michele Morgante                                                                                                                                                                                                                                                                                                                                                                                                                                             |
| EPI_ISL_1167709, EPI_ISL_1167710                                                                                                                                                                                                                                                               | Genetica Molecular and Subdepartamento de Virologia ISP Chile                                             | Instituto de Salud Publica de Chile                                                                                        | Javier Tognarelli, Karen Orostica, Barbara Parra, Loredana Arata, Jaime Lagos, Gisselle Barra, Patricia Bustos, Rodrigo Fasce, Andres Castillo, Jorge Fernandez                                                                                                                                                                                                                                                                                                                                                                                                                                          |
| EPI_ISL_1168662, EPI_ISL_1168663, EPI_ISL_1168669, EPI_ISL_1168679                                                                                                                                                                                                                             | Centers for Disease Control and Prevention, Dengue Branch                                                 | Centers for Disease Control and Prevention, Dengue Branch                                                                  | Gilberto A. Santiago, Glenda Gonzalez, Betzabel Flores, Keyla Charriez, Gabriela Paz-Bailey, Jorge L. Munoz-Jordan                                                                                                                                                                                                                                                                                                                                                                                                                                                                                       |
| EPI_ISL_1169534, EPI_ISL_1169535, EPI_ISL_1169537                                                                                                                                                                                                                                              | Commonwealth Healthcare Center                                                                            | Genomics and Discovery, Respiratory Viruses Branch, Division of Viral Diseases, Centers for Disease Control and Prevention | Krista Queen, Yan Li, Ying Tao, Jing Zhang, Anna Uehara, Anna Montmayeur, Clinton R. Paden, Peter W. Cook, Rachel Marine, Mili Sheth, Jasmine Padilla, Sarah Nobles, Mark Burroughs, Lori Rowe, Haibin Wang, Ben L. Rambo-Martin, Dhwani Batra, Justin Lee, Suxiang Tong                                                                                                                                                                                                                                                                                                                                 |
| EPI_ISL_1169697, EPI_ISL_1169699, EPI_ISL_1169701, EPI_ISL_1169702, EPI_ISL_1169703, EPI_ISL_1169704, EPI_ISL_1169705, EPI_ISL_1169706, EPI_ISL_1169707, EPI_ISL_1169710, EPI_ISL_1169711, EPI_ISL_1169714, EPI_ISL_1169715                                                                    |                                                                                                           |                                                                                                                            |                                                                                                                                                                                                                                                                                                                                                                                                                                                                                                                                                                                                          |
| see above                                                                                                                                                                                                                                                                                      | Colorado Department of Public Health and Environment                                                      | Colorado Department of Public Health and Environment                                                                       | Laura Bankers, Molly C. Hetherington-Rauth, Diana Ir, Shannon Ely, Shannon R. Matzinger, Sarah Elizabeth Totten, Emily A. Travanty                                                                                                                                                                                                                                                                                                                                                                                                                                                                       |
| EPI_ISL_626124, EPI_ISL_626127, EPI_ISL_626132, EPI_ISL_626133, EPI_ISL_626134, EPI_ISL_626138, EPI_ISL_626139, EPI_ISL_626146, EPI_ISL_626148, EPI_ISL_626149, EPI_ISL_626157, EPI_ISL_626164                                                                                                 |                                                                                                           |                                                                                                                            |                                                                                                                                                                                                                                                                                                                                                                                                                                                                                                                                                                                                          |
| see above                                                                                                                                                                                                                                                                                      | Department of Virus and Microbiological Special Diagnostics, Statens Serum Institut, Denmark              | Albertsen lab, Department of Chemistry and Bioscience, Aalborg University, Denmark                                         | Danish Covid-19 Genome Consortia                                                                                                                                                                                                                                                                                                                                                                                                                                                                                                                                                                         |
| EPI_ISL_651107, EPI_ISL_652401, EPI_ISL_652402, EPI_ISL_652403, EPI_ISL_652404, EPI_ISL_652405, EPI_ISL_652408, EPI_ISL_652409, EPI_ISL_652410, EPI_ISL_652411, EPI_ISL_652412                                                                                                                 |                                                                                                           |                                                                                                                            |                                                                                                                                                                                                                                                                                                                                                                                                                                                                                                                                                                                                          |
| see above                                                                                                                                                                                                                                                                                      | Queens Medical Centre, Clinical Microbiology Department / DeepSeq Nottingham                              | COVID-19 Genomics UK (COG-UK) Consortium                                                                                   | Gemma Clark, Wendy Smith, Manjinder Khakh, Vicki M Fleming, Michelle M Lister, Hannah Howson-Wells, Jonathan Ball, Patrick McClure, Joseph Chappell, Theocharis Tsoleridis, Nadine Holmes, Matthew Carlisle, Christopher Moore, Fei Sang, Johnny Debebe, Victoria Wright, Matthew Loose                                                                                                                                                                                                                                                                                                                  |
| EPI_ISL_654799, EPI_ISL_654800, EPI_ISL_654801, EPI_ISL_654802, EPI_ISL_654803, EPI_ISL_654804, EPI_ISL_654805, EPI_ISL_654806, EPI_ISL_654808                                                                                                                                                 | SA Pathology                                                                                              | SA Pathology                                                                                                               | Lex Leong, Julien Soubrier, Chuan Kok Lim, Song Gao, Mark Turra, Karin Kassahn, Ivan Bastian, Geoff Higgins                                                                                                                                                                                                                                                                                                                                                                                                                                                                                              |
| EPI_ISL_660070                                                                                                                                                                                                                                                                                 | Zurita & Zurita Laboratories                                                                              | Zurita & Zurita Laboratories                                                                                               | Gabriela Sevillano Camilo Zurita-Salinas Karen Loaiza David Ortega-Parades Jeannete Zurita                                                                                                                                                                                                                                                                                                                                                                                                                                                                                                               |
| EPI_ISL_660229, EPI_ISL_660231, EPI_ISL_660232, EPI_ISL_660256, EPI_ISL_660257                                                                                                                                                                                                                 | KRISP, KZN Research Innovation and Sequencing Platform                                                    | KRISP, KZN Research Innovation and Sequencing Platform                                                                     | Giandhari J, Pillay S, Lessells R, Mdlalose K, York D, Khan S, Tegally H, Wilkinson E, de Oliveira T                                                                                                                                                                                                                                                                                                                                                                                                                                                                                                     |
| EPI_ISL_661218, EPI_ISL_661219, EPI_ISL_661220, EPI_ISL_661222, EPI_ISL_661224, EPI_ISL_661225, EPI_ISL_661226, EPI_ISL_661228, EPI_ISL_661230, EPI_ISL_661231, EPI_ISL_661232, EPI_ISL_661233, EPI_ISL_661234, EPI_ISL_661236, EPI_ISL_661238, EPI_ISL_661239, EPI_ISL_661240, EPI_ISL_661241 |                                                                                                           |                                                                                                                            |                                                                                                                                                                                                                                                                                                                                                                                                                                                                                                                                                                                                          |
| see above                                                                                                                                                                                                                                                                                      | Department of Clinical Microbiology                                                                       | GIGA Medical Genomics                                                                                                      | Keith Durkin, Maria Artesi, Sébastien Bontems, Raphaël Boreux, Bouchra Boujemla, Cécile Meex, Pierrette Melin, Marie-Pierre Hayette, Vincent Bours                                                                                                                                                                                                                                                                                                                                                                                                                                                       |
| EPI_ISL_661258                                                                                                                                                                                                                                                                                 | LabPLUS                                                                                                   | Institute of Environmental Science and Research (ESR)                                                                      | Xiaoyun Ren, Matt Storey, Nikki Freed, Muhammad Faisal, Jing Wang, Hermes Perez, Anja Werno, Antje van der Linden, Arlo Upton, Chris Mansell, David Hammer, Dragana Drinkovic, Gary McAuliffe, Hana Sofia Andersson, James Ussher, Jill Sherwood, Josh Freeman, Julia Howard, Juliet Elvy, Mary DeAlmeida, Matt Blakiston, Matthew Rogers, Max Bloomfield, Michael Addidle, Michelle Balm, Sally Roberts, Sarah Jefferies, Sharmini Muttaiyah, Susan Morpeth, Susan Taylor, Timothy Blackmore, Vani Sathyendran, Veronica Playle, Virginia Hope, Erasmus Smit, Lauren Jelly, Olin Silander, Joep de Ligt |
| EPI_ISL_665005, EPI_ISL_665013                                                                                                                                                                                                                                                                 | Department of Pathology, University of Cambridge                                                          | COVID-19 Genomics UK (COG-UK) Consortium                                                                                   | Aminu S. Jahun, Yasmin Chaudhry, Grant Hall, Iliana Georgana, Myra Hosmillo, Martin D. Curran, Malte Pinckert, Surendra Parmar, Ian Goodfellow                                                                                                                                                                                                                                                                                                                                                                                                                                                           |
| EPI_ISL_665636                                                                                                                                                                                                                                                                                 | University College London Hospital                                                                        | COVID-19 Genomics UK (COG-UK) Consortium                                                                                   | Judith Heaney, Matthew Byott, Catherine Houlihan, Dan Frampton, Stuart Kirk, Moira Spyer and Eleni Nastouli                                                                                                                                                                                                                                                                                                                                                                                                                                                                                              |
| EPI_ISL_665641                                                                                                                                                                                                                                                                                 | West of Scotland Specialist Virology Centre, NHSGGC / MRC-University of Glasgow Centre for Virus Research | COVID-19 Genomics UK (COG-UK) Consortium                                                                                   | Ana da Silva Filipe, Natasha Johnson, Kathy Smollett, Daniel Mair, Stephen Carmichael, Alice Broos, Lily Tong, Jenna Nichols, Kyriaki Nomikou; Sarah McDonald; Richard Orton, Joseph Hughes, Sreenu Vattipally, David L Robertson; Alasdair MacLean, Rory Gunson; Sharif Shaaban, Matthew Holden; Rachel Blacow, Guy Mollett, Kathy Li, James Shepherd, Antonia Ho, Emma Thomson                                                                                                                                                                                                                         |
| EPI_ISL_665840, EPI_ISL_665841, EPI_ISL_665848                                                                                                                                                                                                                                                 | University College London Hospital                                                                        | COVID-19 Genomics UK (COG-UK) Consortium                                                                                   | Judith Heaney, Matthew Byott, Catherine Houlihan, Dan Frampton, Stuart Kirk, Moira Spyer and Eleni Nastouli                                                                                                                                                                                                                                                                                                                                                                                                                                                                                              |
| EPI_ISL_665908, EPI_ISL_665910, EPI_ISL_665911, EPI_ISL_665914, EPI_ISL_665916, EPI_ISL_665918, EPI_ISL_665923, EPI_ISL_665924, EPI_ISL_665925, EPI_ISL_665926, EPI_ISL_665927, EPI_ISL_665932, EPI_ISL_665933, EPI_ISL_665936, EPI_ISL_665937                                                 |                                                                                                           |                                                                                                                            |                                                                                                                                                                                                                                                                                                                                                                                                                                                                                                                                                                                                          |
| see above                                                                                                                                                                                                                                                                                      | Queens Medical Centre, Clinical Microbiology Department / DeepSeq Nottingham                              | COVID-19 Genomics UK (COG-UK) Consortium                                                                                   | Gemma Clark, Wendy Smith, Manjinder Khakh, Vicki M Fleming, Michelle M Lister, Hannah Howson-Wells, Jonathan Ball, Patrick McClure, Joseph Chappell, Theocharis Tsoleridis, Nadine Holmes, Matthew Carlisle, Christopher Moore, Fei Sang, Johnny Debebe, Victoria Wright, Matthew Loose                                                                                                                                                                                                                                                                                                                  |

|                                                                                                                                                                                                                                                                                                                                                                                                                                                                                                                                                                                                                                                                                                                                                                                                                                                                                                                                                                                                                                                                                                                                                                                                                                                                                                                                                                                                                                                                                                                                                                                                                                                                                                                                                                                                                                                                                                                                                                                                                                                                                                                                                                                |                                                                                                                                                                                  |                                                                                                                                                                                                 |                                                                                                                                                                                                                                                                                                                                                                                                                                                                                                                                                                                                          |                                                                                                                                                                                                                                                                   |
|--------------------------------------------------------------------------------------------------------------------------------------------------------------------------------------------------------------------------------------------------------------------------------------------------------------------------------------------------------------------------------------------------------------------------------------------------------------------------------------------------------------------------------------------------------------------------------------------------------------------------------------------------------------------------------------------------------------------------------------------------------------------------------------------------------------------------------------------------------------------------------------------------------------------------------------------------------------------------------------------------------------------------------------------------------------------------------------------------------------------------------------------------------------------------------------------------------------------------------------------------------------------------------------------------------------------------------------------------------------------------------------------------------------------------------------------------------------------------------------------------------------------------------------------------------------------------------------------------------------------------------------------------------------------------------------------------------------------------------------------------------------------------------------------------------------------------------------------------------------------------------------------------------------------------------------------------------------------------------------------------------------------------------------------------------------------------------------------------------------------------------------------------------------------------------|----------------------------------------------------------------------------------------------------------------------------------------------------------------------------------|-------------------------------------------------------------------------------------------------------------------------------------------------------------------------------------------------|----------------------------------------------------------------------------------------------------------------------------------------------------------------------------------------------------------------------------------------------------------------------------------------------------------------------------------------------------------------------------------------------------------------------------------------------------------------------------------------------------------------------------------------------------------------------------------------------------------|-------------------------------------------------------------------------------------------------------------------------------------------------------------------------------------------------------------------------------------------------------------------|
| EPI_ISL_666046, EPI_ISL_666050, EPI_ISL_666057                                                                                                                                                                                                                                                                                                                                                                                                                                                                                                                                                                                                                                                                                                                                                                                                                                                                                                                                                                                                                                                                                                                                                                                                                                                                                                                                                                                                                                                                                                                                                                                                                                                                                                                                                                                                                                                                                                                                                                                                                                                                                                                                 | West of Scotland Specialist Virology Centre, NHSGGC / MRC-University of Glasgow Centre for Virus Research                                                                        | COVID-19 Genomics UK (COG-UK) Consortium                                                                                                                                                        | Ana da Silva Filipe, Natasha Johnson, Kathy Smollett, Daniel Mair, Stephen Carmichael, Alice Broos, Lily Tong, Jenna Nichols, Kyriaki Nomikou; Sarah McDonald; Richard Orton, Joseph Hughes, Sreenu Vattipally, David L Robertson; Alasdair MacLean, Rory Gunson; Sharif Shaaban, Matthew Holden; Rachel Blacow, Guy Mollett, Kathy Li, James Shepherd, Antonia Ho, Emma Thomson                                                                                                                                                                                                                         |                                                                                                                                                                                                                                                                   |
| EPI_ISL_668601, EPI_ISL_668606, EPI_ISL_668635, EPI_ISL_668636, EPI_ISL_668663, EPI_ISL_668667, EPI_ISL_668668, EPI_ISL_668669, EPI_ISL_668671, EPI_ISL_668672, EPI_ISL_668718, EPI_ISL_668719, EPI_ISL_668853, EPI_ISL_668855, EPI_ISL_668858, EPI_ISL_668859, EPI_ISL_668861, EPI_ISL_668863, EPI_ISL_668867, EPI_ISL_668868, EPI_ISL_668869, EPI_ISL_668870, EPI_ISL_668871, EPI_ISL_668872, EPI_ISL_668873, EPI_ISL_668874, EPI_ISL_668875, EPI_ISL_668877, EPI_ISL_668878, EPI_ISL_668880, EPI_ISL_668883, EPI_ISL_668884, EPI_ISL_668885, EPI_ISL_668887, EPI_ISL_668889, EPI_ISL_668893, EPI_ISL_668894, EPI_ISL_668896, EPI_ISL_668900, EPI_ISL_668903, EPI_ISL_668904, EPI_ISL_668905, EPI_ISL_668907, EPI_ISL_668908, EPI_ISL_668909, EPI_ISL_668910, EPI_ISL_668911, EPI_ISL_668912, EPI_ISL_668913, EPI_ISL_668914, EPI_ISL_668915, EPI_ISL_668918, EPI_ISL_668923, EPI_ISL_668924, EPI_ISL_668925, EPI_ISL_668927, EPI_ISL_668928, EPI_ISL_668930, EPI_ISL_668931, EPI_ISL_668932, EPI_ISL_668933, EPI_ISL_668936, EPI_ISL_668937, EPI_ISL_668940, EPI_ISL_668943, EPI_ISL_668944, EPI_ISL_668946, EPI_ISL_668947, EPI_ISL_668948, EPI_ISL_668949, EPI_ISL_668950, EPI_ISL_668951, EPI_ISL_668952, EPI_ISL_668954, EPI_ISL_668956                                                                                                                                                                                                                                                                                                                                                                                                                                                                                                                                                                                                                                                                                                                                                                                                                                                                                                                                 | see above                                                                                                                                                                        | Department of Virus and Microbiological Special Diagnostics, Statens Serum Institut, Copenhagen, Denmark                                                                                        | Albertsen Lab, Department of Chemistry and Bioscience, Aalborg University, Denmark                                                                                                                                                                                                                                                                                                                                                                                                                                                                                                                       | Danish Covid-19 Genome Consortium                                                                                                                                                                                                                                 |
| EPI_ISL_671883                                                                                                                                                                                                                                                                                                                                                                                                                                                                                                                                                                                                                                                                                                                                                                                                                                                                                                                                                                                                                                                                                                                                                                                                                                                                                                                                                                                                                                                                                                                                                                                                                                                                                                                                                                                                                                                                                                                                                                                                                                                                                                                                                                 | National Virus Reference Laboratory                                                                                                                                              | National Virus Reference Laboratory                                                                                                                                                             | Michael Carr, Gabriel Gonzalez, Jonathan Dean, Daniel Hare, Cillian F De Gascun                                                                                                                                                                                                                                                                                                                                                                                                                                                                                                                          |                                                                                                                                                                                                                                                                   |
| EPI_ISL_672758, EPI_ISL_672764, EPI_ISL_672782, EPI_ISL_672799, EPI_ISL_672837, EPI_ISL_672850, EPI_ISL_672853, EPI_ISL_672857, EPI_ISL_672864, EPI_ISL_672894                                                                                                                                                                                                                                                                                                                                                                                                                                                                                                                                                                                                                                                                                                                                                                                                                                                                                                                                                                                                                                                                                                                                                                                                                                                                                                                                                                                                                                                                                                                                                                                                                                                                                                                                                                                                                                                                                                                                                                                                                 | Lighthouse Lab in Glasgow                                                                                                                                                        | Wellcome Sanger Institute for the COVID-19 Genomics UK (COG-UK) Consortium                                                                                                                      | Harper VanSteenhouse, Yumi Kasai, David Gray, Carol Clugston, Anna Dominiczak and Alex Alderton, Roberto Amato, Sonia Goncalves, Ewan Harrison, David K. Jackson, Ian Johnston, Dominic Kwiatkowski, Cordelia Langford, John Sillitoe on behalf of the Wellcome Sanger Institute COVID-19 Surveillance Team                                                                                                                                                                                                                                                                                              |                                                                                                                                                                                                                                                                   |
| EPI_ISL_673288, EPI_ISL_673443                                                                                                                                                                                                                                                                                                                                                                                                                                                                                                                                                                                                                                                                                                                                                                                                                                                                                                                                                                                                                                                                                                                                                                                                                                                                                                                                                                                                                                                                                                                                                                                                                                                                                                                                                                                                                                                                                                                                                                                                                                                                                                                                                 | Lighthouse Lab in Cambridge                                                                                                                                                      | Wellcome Sanger Institute for the COVID-19 Genomics UK (COG-UK) Consortium                                                                                                                      | Rob Howes, The Lighthouse Lab in Cambridge and Alex Alderton, Roberto Amato, Sonia Goncalves, Ewan Harrison, David K. Jackson, Ian Johnston, Dominic Kwiatkowski, Cordelia Langford, John Sillitoe on behalf of the Wellcome Sanger Institute COVID-19 Surveillance Team                                                                                                                                                                                                                                                                                                                                 |                                                                                                                                                                                                                                                                   |
| EPI_ISL_674863                                                                                                                                                                                                                                                                                                                                                                                                                                                                                                                                                                                                                                                                                                                                                                                                                                                                                                                                                                                                                                                                                                                                                                                                                                                                                                                                                                                                                                                                                                                                                                                                                                                                                                                                                                                                                                                                                                                                                                                                                                                                                                                                                                 | Lighthouse Lab in Milton Keynes                                                                                                                                                  | Wellcome Sanger Institute for the COVID-19 Genomics UK (COG-UK) Consortium                                                                                                                      | The Lighthouse Lab in Milton Keynes and Alex Alderton, Roberto Amato, Sonia Goncalves, Ewan Harrison, David K. Jackson, Ian Johnston, Dominic Kwiatkowski, Cordelia Langford, John Sillitoe on behalf of the Wellcome Sanger Institute COVID-19 Surveillance Team                                                                                                                                                                                                                                                                                                                                        |                                                                                                                                                                                                                                                                   |
| EPI_ISL_676491, EPI_ISL_676502, EPI_ISL_676503, EPI_ISL_676504                                                                                                                                                                                                                                                                                                                                                                                                                                                                                                                                                                                                                                                                                                                                                                                                                                                                                                                                                                                                                                                                                                                                                                                                                                                                                                                                                                                                                                                                                                                                                                                                                                                                                                                                                                                                                                                                                                                                                                                                                                                                                                                 | Klinisk mikrobiologi                                                                                                                                                             | The Public Health Agency of Sweden                                                                                                                                                              | Department of Microbiology, The Public Health Agency of Sweden                                                                                                                                                                                                                                                                                                                                                                                                                                                                                                                                           |                                                                                                                                                                                                                                                                   |
| EPI_ISL_678261, EPI_ISL_678264, EPI_ISL_678265, EPI_ISL_678266, EPI_ISL_678267                                                                                                                                                                                                                                                                                                                                                                                                                                                                                                                                                                                                                                                                                                                                                                                                                                                                                                                                                                                                                                                                                                                                                                                                                                                                                                                                                                                                                                                                                                                                                                                                                                                                                                                                                                                                                                                                                                                                                                                                                                                                                                 | Communicable Disease Laboratory, Public Health Directorate                                                                                                                       | Communicable Disease Laboratory, Public Health Directorate                                                                                                                                      | Alwasti,H., Altaif,Z., AlHujairi,Z., AlAbbas,Z.                                                                                                                                                                                                                                                                                                                                                                                                                                                                                                                                                          |                                                                                                                                                                                                                                                                   |
| EPI_ISL_678456, EPI_ISL_678457, EPI_ISL_678458, EPI_ISL_678459, EPI_ISL_678461, EPI_ISL_678464, EPI_ISL_678465, EPI_ISL_678466, EPI_ISL_678469, EPI_ISL_678470, EPI_ISL_678472, EPI_ISL_678473, EPI_ISL_678475, EPI_ISL_678478, EPI_ISL_678479, EPI_ISL_678480, EPI_ISL_678483, EPI_ISL_678484, EPI_ISL_678485                                                                                                                                                                                                                                                                                                                                                                                                                                                                                                                                                                                                                                                                                                                                                                                                                                                                                                                                                                                                                                                                                                                                                                                                                                                                                                                                                                                                                                                                                                                                                                                                                                                                                                                                                                                                                                                                 | see above                                                                                                                                                                        | Department of Clinical Microbiology                                                                                                                                                             | GIGA Medical Genomics                                                                                                                                                                                                                                                                                                                                                                                                                                                                                                                                                                                    | Keith Durkin, Maria Artesi, Sébastien Bontems, Raphaël Boreux, Bouchra Boujemla, Cécile Meex, Pierrette Melin, Marie-Pierre Hayette, Vincent Bours                                                                                                                |
| EPI_ISL_678706, EPI_ISL_678719                                                                                                                                                                                                                                                                                                                                                                                                                                                                                                                                                                                                                                                                                                                                                                                                                                                                                                                                                                                                                                                                                                                                                                                                                                                                                                                                                                                                                                                                                                                                                                                                                                                                                                                                                                                                                                                                                                                                                                                                                                                                                                                                                 | Respiratory Virus Unit, Microbiology Services Colindale, Public Health England                                                                                                   | COVID-19 Genomics UK (COG-UK) Consortium                                                                                                                                                        | PHE Covid Sequencing Team                                                                                                                                                                                                                                                                                                                                                                                                                                                                                                                                                                                |                                                                                                                                                                                                                                                                   |
| EPI_ISL_679161, EPI_ISL_679165, EPI_ISL_679166, EPI_ISL_679167, EPI_ISL_679168, EPI_ISL_679179, EPI_ISL_679191, EPI_ISL_679193                                                                                                                                                                                                                                                                                                                                                                                                                                                                                                                                                                                                                                                                                                                                                                                                                                                                                                                                                                                                                                                                                                                                                                                                                                                                                                                                                                                                                                                                                                                                                                                                                                                                                                                                                                                                                                                                                                                                                                                                                                                 | Department of Pathology, University of Cambridge                                                                                                                                 | COVID-19 Genomics UK (COG-UK) Consortium                                                                                                                                                        | Aminu S. Jahun, Yasmin Chaudhry, Grant Hall, Iliana Georgana, Myra Hosmillo, Martin D. Curran, Malte Pinckert, Surendra Parmar, Ian Goodfellow                                                                                                                                                                                                                                                                                                                                                                                                                                                           |                                                                                                                                                                                                                                                                   |
| EPI_ISL_679256, EPI_ISL_679258, EPI_ISL_679263, EPI_ISL_679278, EPI_ISL_679308, EPI_ISL_679313                                                                                                                                                                                                                                                                                                                                                                                                                                                                                                                                                                                                                                                                                                                                                                                                                                                                                                                                                                                                                                                                                                                                                                                                                                                                                                                                                                                                                                                                                                                                                                                                                                                                                                                                                                                                                                                                                                                                                                                                                                                                                 | Queens Medical Centre, Clinical Microbiology Department / DeepSeq Nottingham                                                                                                     | COVID-19 Genomics UK (COG-UK) Consortium                                                                                                                                                        | Gemma Clark, Wendy Smith, Manjinder Khakh, Vicki M Fleming, Michelle M Lister, Hannah Howson-Wells, Jonathan Ball, Patrick McClure, Joseph Chappell, Theocharis Tsoieridis, Nadine Holmes, Matthew Carlisle, Christopher Moore, Fei Sang, Johnny Debebe, Victoria Wright, Matthew Loose                                                                                                                                                                                                                                                                                                                  |                                                                                                                                                                                                                                                                   |
| EPI_ISL_679407, EPI_ISL_679416, EPI_ISL_679417, EPI_ISL_679420, EPI_ISL_679421, EPI_ISL_679422, EPI_ISL_679423, EPI_ISL_679424, EPI_ISL_679425, EPI_ISL_679426, EPI_ISL_679432, EPI_ISL_679433, EPI_ISL_679434, EPI_ISL_679437, EPI_ISL_679438, EPI_ISL_679441, EPI_ISL_679442, EPI_ISL_679446                                                                                                                                                                                                                                                                                                                                                                                                                                                                                                                                                                                                                                                                                                                                                                                                                                                                                                                                                                                                                                                                                                                                                                                                                                                                                                                                                                                                                                                                                                                                                                                                                                                                                                                                                                                                                                                                                 | see above                                                                                                                                                                        | University College London Hospital                                                                                                                                                              | Judith Heaney, Matthew Byott, Catherine Houlihan, Dan Frampton, Stuart Kirk, Moira Spyer and Eleni Nastouli                                                                                                                                                                                                                                                                                                                                                                                                                                                                                              |                                                                                                                                                                                                                                                                   |
| EPI_ISL_679944                                                                                                                                                                                                                                                                                                                                                                                                                                                                                                                                                                                                                                                                                                                                                                                                                                                                                                                                                                                                                                                                                                                                                                                                                                                                                                                                                                                                                                                                                                                                                                                                                                                                                                                                                                                                                                                                                                                                                                                                                                                                                                                                                                 | Queens Medical Centre, Clinical Microbiology Department / DeepSeq Nottingham                                                                                                     | COVID-19 Genomics UK (COG-UK) Consortium                                                                                                                                                        | Gemma Clark, Wendy Smith, Manjinder Khakh, Vicki M Fleming, Michelle M Lister, Hannah Howson-Wells, Jonathan Ball, Patrick McClure, Joseph Chappell, Theocharis Tsoieridis, Nadine Holmes, Matthew Carlisle, Christopher Moore, Fei Sang, Johnny Debebe, Victoria Wright, Matthew Loose                                                                                                                                                                                                                                                                                                                  |                                                                                                                                                                                                                                                                   |
| EPI_ISL_679951, EPI_ISL_679954                                                                                                                                                                                                                                                                                                                                                                                                                                                                                                                                                                                                                                                                                                                                                                                                                                                                                                                                                                                                                                                                                                                                                                                                                                                                                                                                                                                                                                                                                                                                                                                                                                                                                                                                                                                                                                                                                                                                                                                                                                                                                                                                                 | Lincolnshire Hospitals and DeepSeq Nottingham                                                                                                                                    | COVID-19 Genomics UK (COG-UK) Consortium                                                                                                                                                        | Nichola Duckworth, Tim Sloan, Sarah Walsh, Jonathan Ball, Patrick McClure, Joseph Chappell, Nadine Holmes, Matthew Carlisle, Christopher Moore, Fei Sang, Johnny Debebe, Victoria Wright, Matthew Loose                                                                                                                                                                                                                                                                                                                                                                                                  |                                                                                                                                                                                                                                                                   |
| EPI_ISL_680144                                                                                                                                                                                                                                                                                                                                                                                                                                                                                                                                                                                                                                                                                                                                                                                                                                                                                                                                                                                                                                                                                                                                                                                                                                                                                                                                                                                                                                                                                                                                                                                                                                                                                                                                                                                                                                                                                                                                                                                                                                                                                                                                                                 | Virology Department, Sheffield Teaching Hospitals NHS Foundation Trust/Department of Infection, Immunity and Cardiovascular Disease, The Medical School, University of Sheffield | COVID-19 Genomics UK (COG-UK) Consortium                                                                                                                                                        | Thushan de Silva, Matthew Parker, Nikki Smith, Adri Anygal, Rebecca Brown, Luke Green, Rachel Tucker, Paul Parsons, Danielle Groves, Katie Johnson, Laura Carrilero, Alex Keeley, Dave Partridge, Matthew Wyles, Benjamin Lindsey, Mehmet Yavuz, Mohammad Raza, Cariad Evans                                                                                                                                                                                                                                                                                                                             |                                                                                                                                                                                                                                                                   |
| EPI_ISL_680461, EPI_ISL_680467, EPI_ISL_680486, EPI_ISL_680490, EPI_ISL_680491, EPI_ISL_680493, EPI_ISL_680541, EPI_ISL_680542, EPI_ISL_680549, EPI_ISL_680550, EPI_ISL_680552, EPI_ISL_680553, EPI_ISL_680555                                                                                                                                                                                                                                                                                                                                                                                                                                                                                                                                                                                                                                                                                                                                                                                                                                                                                                                                                                                                                                                                                                                                                                                                                                                                                                                                                                                                                                                                                                                                                                                                                                                                                                                                                                                                                                                                                                                                                                 | see above                                                                                                                                                                        | Virology Department, Royal Infirmary of Edinburgh, NHS Lothian / School of Biological Sciences, University of Edinburgh / Institute of Genetics and Molecular Medicine, University of Edinburgh | COVID-19 Genomics UK (COG-UK) Consortium                                                                                                                                                                                                                                                                                                                                                                                                                                                                                                                                                                 | McHugh M, Dewar R, Rooke S, Gallagher M, Balcaza C, O'Toole Á, Scher E, Hill V, McCrone JT, Colquhoun R, Yu X, Jackson B, Rambaut A, Williams TC, Templeton K                                                                                                     |
| EPI_ISL_680610, EPI_ISL_680662, EPI_ISL_680665, EPI_ISL_680666, EPI_ISL_680670                                                                                                                                                                                                                                                                                                                                                                                                                                                                                                                                                                                                                                                                                                                                                                                                                                                                                                                                                                                                                                                                                                                                                                                                                                                                                                                                                                                                                                                                                                                                                                                                                                                                                                                                                                                                                                                                                                                                                                                                                                                                                                 | Wales Specialist Virology Centre Sequencing lab: Pathogen Genomics Unit                                                                                                          | COVID-19 Genomics UK (COG-UK) Consortium                                                                                                                                                        | Catherine Moore, Johnathan Evans, Laura Gifford, Malorie Perry, Simon Cottrell, Angela Marchbank, Alec Birchley, Alexander Adams, Amy Gaskin, Bree Gatica-Wilcox, Jason Coombes, Joel Southgate, Lauren Gilbert, Lee Graham, Nicole Pacchiarini, Sara Kumziene-Summerhayes, Sarah Taylor, Sophie Jones, Sara Rey, Matthew Bull, Joanne Watkins, Sally Corden, Tom Connor                                                                                                                                                                                                                                 |                                                                                                                                                                                                                                                                   |
| EPI_ISL_681325, EPI_ISL_681329, EPI_ISL_681331, EPI_ISL_681332, EPI_ISL_681333, EPI_ISL_681336, EPI_ISL_681337, EPI_ISL_681338, EPI_ISL_681341, EPI_ISL_681343, EPI_ISL_681344, EPI_ISL_681346, EPI_ISL_681350, EPI_ISL_681352, EPI_ISL_681354, EPI_ISL_681359, EPI_ISL_681363, EPI_ISL_681364, EPI_ISL_681367, EPI_ISL_681371, EPI_ISL_681373, EPI_ISL_681379, EPI_ISL_681387, EPI_ISL_681397, EPI_ISL_681401, EPI_ISL_681406, EPI_ISL_681407, EPI_ISL_681408, EPI_ISL_681409, EPI_ISL_681411, EPI_ISL_681414, EPI_ISL_681415, EPI_ISL_681417, EPI_ISL_681420, EPI_ISL_681422, EPI_ISL_681423, EPI_ISL_681426, EPI_ISL_681428, EPI_ISL_681431, EPI_ISL_681433, EPI_ISL_681437, EPI_ISL_681438, EPI_ISL_681440, EPI_ISL_681443, EPI_ISL_681444, EPI_ISL_681449, EPI_ISL_681450, EPI_ISL_681451, EPI_ISL_681452, EPI_ISL_681454, EPI_ISL_681455, EPI_ISL_681456, EPI_ISL_681467, EPI_ISL_681470, EPI_ISL_681474, EPI_ISL_681475, EPI_ISL_681476, EPI_ISL_681480, EPI_ISL_681481, EPI_ISL_681485, EPI_ISL_681489, EPI_ISL_681490, EPI_ISL_681495, EPI_ISL_681498, EPI_ISL_681504, EPI_ISL_681508, EPI_ISL_681516, EPI_ISL_681517, EPI_ISL_681518, EPI_ISL_681520, EPI_ISL_681521, EPI_ISL_681524, EPI_ISL_681525, EPI_ISL_681526, EPI_ISL_681529, EPI_ISL_681531, EPI_ISL_681532, EPI_ISL_681538, EPI_ISL_681546, EPI_ISL_681548, EPI_ISL_681549, EPI_ISL_681553, EPI_ISL_681555, EPI_ISL_681559, EPI_ISL_681560, EPI_ISL_681562, EPI_ISL_681563, EPI_ISL_681564, EPI_ISL_681565, EPI_ISL_681567, EPI_ISL_681568, EPI_ISL_681569, EPI_ISL_681572, EPI_ISL_681574, EPI_ISL_681575, EPI_ISL_681577, EPI_ISL_681580, EPI_ISL_681582, EPI_ISL_681583, EPI_ISL_681586, EPI_ISL_681589, EPI_ISL_681590, EPI_ISL_681591, EPI_ISL_681593, EPI_ISL_681594, EPI_ISL_681595, EPI_ISL_681602, EPI_ISL_681608, EPI_ISL_681609, EPI_ISL_681613, EPI_ISL_681614, EPI_ISL_681615, EPI_ISL_681619, EPI_ISL_681621, EPI_ISL_681623, EPI_ISL_681625, EPI_ISL_681627, EPI_ISL_681629, EPI_ISL_681633, EPI_ISL_681635, EPI_ISL_681636, EPI_ISL_681639, EPI_ISL_681640, EPI_ISL_681641, EPI_ISL_681642, EPI_ISL_681646, EPI_ISL_681647, EPI_ISL_681649, EPI_ISL_681650, EPI_ISL_681653, EPI_ISL_681655 | see above                                                                                                                                                                        | Lighthouse Lab in Milton Keynes                                                                                                                                                                 | Wellcome Sanger Institute for the COVID-19 Genomics UK (COG-UK) Consortium                                                                                                                                                                                                                                                                                                                                                                                                                                                                                                                               | The Lighthouse Lab in Milton Keynes and Alex Alderton, Roberto Amato, Sonia Goncalves, Ewan Harrison, David K. Jackson, Ian Johnston, Dominic Kwiatkowski, Cordelia Langford, John Sillitoe on behalf of the Wellcome Sanger Institute COVID-19 Surveillance Team |
| EPI_ISL_682279, EPI_ISL_682282, EPI_ISL_682287, EPI_ISL_682288                                                                                                                                                                                                                                                                                                                                                                                                                                                                                                                                                                                                                                                                                                                                                                                                                                                                                                                                                                                                                                                                                                                                                                                                                                                                                                                                                                                                                                                                                                                                                                                                                                                                                                                                                                                                                                                                                                                                                                                                                                                                                                                 | Middlemore Hospital                                                                                                                                                              | Institute of Environmental Science and Research (ESR)                                                                                                                                           | Xiaoyun Ren, Matt Storey, Nikki Freed, Muhammad Faisal, Jing Wang, Hermes Perez, Anja Werno, Antje van der Linden, Arlo Upton, Chris Mansell, David Hammer, Dragana Drinkovic, Gary McAuliffe, Hana Sofia Andersson, James Ussher, Jill Sherwood, Josh Freeman, Julia Howard, Juliet Elvy, Mary DeAlmeida, Matt Blakiston, Matthew Rogers, Max Bloomfield, Michael Addidle, Michelle Balm, Sally Roberts, Sarah Jefferies, Sharmini Muttaiyah, Susan Morpeth, Susan Taylor, Timothy Blackmore, Vani Sathyendran, Veronica Playle, Virginia Hope, Erasmus Smit, Lauren Jelly, Olin Silander, Joep de Ligt |                                                                                                                                                                                                                                                                   |
| EPI_ISL_682292                                                                                                                                                                                                                                                                                                                                                                                                                                                                                                                                                                                                                                                                                                                                                                                                                                                                                                                                                                                                                                                                                                                                                                                                                                                                                                                                                                                                                                                                                                                                                                                                                                                                                                                                                                                                                                                                                                                                                                                                                                                                                                                                                                 | LabPLUS                                                                                                                                                                          | Institute of Environmental Science and Research (ESR)                                                                                                                                           | Xiaoyun Ren, Matt Storey, Nikki Freed, Muhammad Faisal, Jing Wang, Hermes Perez, Anja Werno, Antje van der Linden, Arlo Upton, Chris Mansell, David Hammer, Dragana Drinkovic, Gary McAuliffe, Hana Sofia Andersson, James Ussher, Jill Sherwood, Josh Freeman, Julia Howard, Juliet Elvy, Mary DeAlmeida, Matt Blakiston, Matthew Rogers, Max Bloomfield, Michael Addidle, Michelle Balm, Sally Roberts, Sarah Jefferies, Sharmini Muttaiyah, Susan Morpeth, Susan Taylor, Timothy Blackmore, Vani Sathyendran, Veronica Playle, Virginia Hope, Erasmus Smit, Lauren Jelly, Olin Silander, Joep de Ligt |                                                                                                                                                                                                                                                                   |
| EPI_ISL_682296                                                                                                                                                                                                                                                                                                                                                                                                                                                                                                                                                                                                                                                                                                                                                                                                                                                                                                                                                                                                                                                                                                                                                                                                                                                                                                                                                                                                                                                                                                                                                                                                                                                                                                                                                                                                                                                                                                                                                                                                                                                                                                                                                                 | Canterbury Health Laboratories                                                                                                                                                   | Institute of Environmental Science and Research (ESR)                                                                                                                                           | Xiaoyun Ren, Matt Storey, Nikki Freed, Muhammad Faisal, Jing Wang, Hermes Perez, Anja Werno, Antje van der Linden, Arlo Upton, Chris Mansell, David Hammer, Dragana Drinkovic, Gary McAuliffe, Hana Sofia Andersson, James Ussher, Jill Sherwood, Josh Freeman, Julia Howard, Juliet Elvy, Mary                                                                                                                                                                                                                                                                                                          |                                                                                                                                                                                                                                                                   |





[illegible]

[illegible]

[illegible]

|                                                                                                                                                                                                                                                                                                                                                                                                                                                                                                                                                                                                                                                                                                                                                                                                                                                                                                                                                                                                                                                                                                                                                                                                                                                                                                                                                                                                                                                                                                                                                                                                                                                                                                                                                                                                                                                                                                                                                                                                                                                                                                                                                                                                                                                                                                                                                                                                                                                                                                                                                                                                                                                                                                                                                                                                                                                                                                                                                                                                                                                                                                                                                                                                                                                                                                                                                                                                                                                                                                                                                                                                                                                                                                                                                                                                                                                                                               |                                                                      |                                                                                        | Team                                                                                                                                                                                                                                                                                                                    |
|-----------------------------------------------------------------------------------------------------------------------------------------------------------------------------------------------------------------------------------------------------------------------------------------------------------------------------------------------------------------------------------------------------------------------------------------------------------------------------------------------------------------------------------------------------------------------------------------------------------------------------------------------------------------------------------------------------------------------------------------------------------------------------------------------------------------------------------------------------------------------------------------------------------------------------------------------------------------------------------------------------------------------------------------------------------------------------------------------------------------------------------------------------------------------------------------------------------------------------------------------------------------------------------------------------------------------------------------------------------------------------------------------------------------------------------------------------------------------------------------------------------------------------------------------------------------------------------------------------------------------------------------------------------------------------------------------------------------------------------------------------------------------------------------------------------------------------------------------------------------------------------------------------------------------------------------------------------------------------------------------------------------------------------------------------------------------------------------------------------------------------------------------------------------------------------------------------------------------------------------------------------------------------------------------------------------------------------------------------------------------------------------------------------------------------------------------------------------------------------------------------------------------------------------------------------------------------------------------------------------------------------------------------------------------------------------------------------------------------------------------------------------------------------------------------------------------------------------------------------------------------------------------------------------------------------------------------------------------------------------------------------------------------------------------------------------------------------------------------------------------------------------------------------------------------------------------------------------------------------------------------------------------------------------------------------------------------------------------------------------------------------------------------------------------------------------------------------------------------------------------------------------------------------------------------------------------------------------------------------------------------------------------------------------------------------------------------------------------------------------------------------------------------------------------------------------------------------------------------------------------------------------------|----------------------------------------------------------------------|----------------------------------------------------------------------------------------|-------------------------------------------------------------------------------------------------------------------------------------------------------------------------------------------------------------------------------------------------------------------------------------------------------------------------|
| EPI_ISL_703705, EPI_ISL_703777,<br>EPI_ISL_703778, EPI_ISL_703780,<br>EPI_ISL_703783<br><br>EPI_ISL_703786                                                                                                                                                                                                                                                                                                                                                                                                                                                                                                                                                                                                                                                                                                                                                                                                                                                                                                                                                                                                                                                                                                                                                                                                                                                                                                                                                                                                                                                                                                                                                                                                                                                                                                                                                                                                                                                                                                                                                                                                                                                                                                                                                                                                                                                                                                                                                                                                                                                                                                                                                                                                                                                                                                                                                                                                                                                                                                                                                                                                                                                                                                                                                                                                                                                                                                                                                                                                                                                                                                                                                                                                                                                                                                                                                                                    | Lighthouse Lab in Alderley Park<br><br><br>Lighthouse Lab in Glasgow | Wellcome Sanger Institute for the COVID-19 Genomics UK (COG-UK) Consortium             | Jacquelyn Wynn, Mairead Hyland, The Lighthouse Lab in Alderley Park and Alex Alderton, Roberto Amato, Sonia Goncalves, Ewan Harrison, David K. Jackson, Ian Johnston, Dominic Kwiatkowski, Cordelia Langford, John Sillitoe on behalf of the Wellcome Sanger Institute COVID-19 Surveillance Team                       |
| <br><br><br>EPI_ISL_703788                                                                                                                                                                                                                                                                                                                                                                                                                                                                                                                                                                                                                                                                                                                                                                                                                                                                                                                                                                                                                                                                                                                                                                                                                                                                                                                                                                                                                                                                                                                                                                                                                                                                                                                                                                                                                                                                                                                                                                                                                                                                                                                                                                                                                                                                                                                                                                                                                                                                                                                                                                                                                                                                                                                                                                                                                                                                                                                                                                                                                                                                                                                                                                                                                                                                                                                                                                                                                                                                                                                                                                                                                                                                                                                                                                                                                                                                    | <br><br><br>Lighthouse Lab in Alderley Park                          | <br><br><br>Wellcome Sanger Institute for the COVID-19 Genomics UK (COG-UK) Consortium | <br><br><br>Jacquelyn Wynn, Mairead Hyland, The Lighthouse Lab in Alderley Park and Alex Alderton, Roberto Amato, Sonia Goncalves, Ewan Harrison, David K. Jackson, Ian Johnston, Dominic Kwiatkowski, Cordelia Langford, John Sillitoe on behalf of the Wellcome Sanger Institute COVID-19 Surveillance Team           |
| <br><br><br>EPI_ISL_703790                                                                                                                                                                                                                                                                                                                                                                                                                                                                                                                                                                                                                                                                                                                                                                                                                                                                                                                                                                                                                                                                                                                                                                                                                                                                                                                                                                                                                                                                                                                                                                                                                                                                                                                                                                                                                                                                                                                                                                                                                                                                                                                                                                                                                                                                                                                                                                                                                                                                                                                                                                                                                                                                                                                                                                                                                                                                                                                                                                                                                                                                                                                                                                                                                                                                                                                                                                                                                                                                                                                                                                                                                                                                                                                                                                                                                                                                    | <br><br><br>Lighthouse Lab in Glasgow                                | <br><br><br>Wellcome Sanger Institute for the COVID-19 Genomics UK (COG-UK) Consortium | <br><br><br>Harper VanSteenhouse, Yumi Kasai, David Gray, Carol Clugston, Anna Dominiczak and Alex Alderton, Roberto Amato, Sonia Goncalves, Ewan Harrison, David K. Jackson, Ian Johnston, Dominic Kwiatkowski, Cordelia Langford, John Sillitoe on behalf of the Wellcome Sanger Institute COVID-19 Surveillance Team |
| EPI_ISL_703791, EPI_ISL_703793,<br>EPI_ISL_703795, EPI_ISL_703796,<br>EPI_ISL_703798<br><br>EPI_ISL_703801                                                                                                                                                                                                                                                                                                                                                                                                                                                                                                                                                                                                                                                                                                                                                                                                                                                                                                                                                                                                                                                                                                                                                                                                                                                                                                                                                                                                                                                                                                                                                                                                                                                                                                                                                                                                                                                                                                                                                                                                                                                                                                                                                                                                                                                                                                                                                                                                                                                                                                                                                                                                                                                                                                                                                                                                                                                                                                                                                                                                                                                                                                                                                                                                                                                                                                                                                                                                                                                                                                                                                                                                                                                                                                                                                                                    | Lighthouse Lab in Alderley Park<br><br><br>Lighthouse Lab in Glasgow | Wellcome Sanger Institute for the COVID-19 Genomics UK (COG-UK) Consortium             | Jacquelyn Wynn, Mairead Hyland, The Lighthouse Lab in Alderley Park and Alex Alderton, Roberto Amato, Sonia Goncalves, Ewan Harrison, David K. Jackson, Ian Johnston, Dominic Kwiatkowski, Cordelia Langford, John Sillitoe on behalf of the Wellcome Sanger Institute COVID-19 Surveillance Team                       |
| <br><br><br>EPI_ISL_703803, EPI_ISL_703804                                                                                                                                                                                                                                                                                                                                                                                                                                                                                                                                                                                                                                                                                                                                                                                                                                                                                                                                                                                                                                                                                                                                                                                                                                                                                                                                                                                                                                                                                                                                                                                                                                                                                                                                                                                                                                                                                                                                                                                                                                                                                                                                                                                                                                                                                                                                                                                                                                                                                                                                                                                                                                                                                                                                                                                                                                                                                                                                                                                                                                                                                                                                                                                                                                                                                                                                                                                                                                                                                                                                                                                                                                                                                                                                                                                                                                                    | <br><br><br>Lighthouse Lab in Alderley Park                          | <br><br><br>Wellcome Sanger Institute for the COVID-19 Genomics UK (COG-UK) Consortium | <br><br><br>Jacquelyn Wynn, Mairead Hyland, The Lighthouse Lab in Alderley Park and Alex Alderton, Roberto Amato, Sonia Goncalves, Ewan Harrison, David K. Jackson, Ian Johnston, Dominic Kwiatkowski, Cordelia Langford, John Sillitoe on behalf of the Wellcome Sanger Institute COVID-19 Surveillance Team           |
| <br><br><br>EPI_ISL_703808                                                                                                                                                                                                                                                                                                                                                                                                                                                                                                                                                                                                                                                                                                                                                                                                                                                                                                                                                                                                                                                                                                                                                                                                                                                                                                                                                                                                                                                                                                                                                                                                                                                                                                                                                                                                                                                                                                                                                                                                                                                                                                                                                                                                                                                                                                                                                                                                                                                                                                                                                                                                                                                                                                                                                                                                                                                                                                                                                                                                                                                                                                                                                                                                                                                                                                                                                                                                                                                                                                                                                                                                                                                                                                                                                                                                                                                                    | <br><br><br>Lighthouse Lab in Glasgow                                | <br><br><br>Wellcome Sanger Institute for the COVID-19 Genomics UK (COG-UK) Consortium | <br><br><br>Harper VanSteenhouse, Yumi Kasai, David Gray, Carol Clugston, Anna Dominiczak and Alex Alderton, Roberto Amato, Sonia Goncalves, Ewan Harrison, David K. Jackson, Ian Johnston, Dominic Kwiatkowski, Cordelia Langford, John Sillitoe on behalf of the Wellcome Sanger Institute COVID-19 Surveillance Team |
| EPI_ISL_703809, EPI_ISL_703812,<br>EPI_ISL_703814                                                                                                                                                                                                                                                                                                                                                                                                                                                                                                                                                                                                                                                                                                                                                                                                                                                                                                                                                                                                                                                                                                                                                                                                                                                                                                                                                                                                                                                                                                                                                                                                                                                                                                                                                                                                                                                                                                                                                                                                                                                                                                                                                                                                                                                                                                                                                                                                                                                                                                                                                                                                                                                                                                                                                                                                                                                                                                                                                                                                                                                                                                                                                                                                                                                                                                                                                                                                                                                                                                                                                                                                                                                                                                                                                                                                                                             | Lighthouse Lab in Alderley Park                                      | Wellcome Sanger Institute for the COVID-19 Genomics UK (COG-UK) Consortium             | Jacquelyn Wynn, Mairead Hyland, The Lighthouse Lab in Alderley Park and Alex Alderton, Roberto Amato, Sonia Goncalves, Ewan Harrison, David K. Jackson, Ian Johnston, Dominic Kwiatkowski, Cordelia Langford, John Sillitoe on behalf of the Wellcome Sanger Institute COVID-19 Surveillance Team                       |
| EPI_ISL_703816, EPI_ISL_703819, EPI_ISL_703820, EPI_ISL_703822, EPI_ISL_703824, EPI_ISL_703825, EPI_ISL_703830, EPI_ISL_703836, EPI_ISL_703840, EPI_ISL_703841, EPI_ISL_703843, EPI_ISL_703851, EPI_ISL_703852, EPI_ISL_703854, EPI_ISL_703861, EPI_ISL_703862, EPI_ISL_703866, EPI_ISL_703869, EPI_ISL_703878, EPI_ISL_703880, EPI_ISL_703882, EPI_ISL_703883, EPI_ISL_703887, EPI_ISL_703889, EPI_ISL_703890, EPI_ISL_703895, EPI_ISL_703900, EPI_ISL_703901, EPI_ISL_703906, EPI_ISL_703909, EPI_ISL_703910, EPI_ISL_703912, EPI_ISL_703917, EPI_ISL_703919, EPI_ISL_703925, EPI_ISL_703928, EPI_ISL_703930, EPI_ISL_703933, EPI_ISL_703934, EPI_ISL_703938, EPI_ISL_703943, EPI_ISL_703944, EPI_ISL_703951, EPI_ISL_703956, EPI_ISL_703962, EPI_ISL_703967, EPI_ISL_703972, EPI_ISL_703976, EPI_ISL_703980, EPI_ISL_703981, EPI_ISL_703983, EPI_ISL_703984, EPI_ISL_703986, EPI_ISL_703988, EPI_ISL_703989, EPI_ISL_703991, EPI_ISL_703994, EPI_ISL_703997, EPI_ISL_703999, EPI_ISL_704000, EPI_ISL_704002, EPI_ISL_704004, EPI_ISL_704005, EPI_ISL_704007, EPI_ISL_704008, EPI_ISL_704010, EPI_ISL_704013, EPI_ISL_704016, EPI_ISL_704018, EPI_ISL_704023, EPI_ISL_704024, EPI_ISL_704026, EPI_ISL_704029, EPI_ISL_704031, EPI_ISL_704034, EPI_ISL_704035, EPI_ISL_704037, EPI_ISL_704040, EPI_ISL_704042, EPI_ISL_704045, EPI_ISL_704048, EPI_ISL_704051, EPI_ISL_704053, EPI_ISL_704056, EPI_ISL_704059, EPI_ISL_704063, EPI_ISL_704064, EPI_ISL_704066, EPI_ISL_704071, EPI_ISL_704072, EPI_ISL_704077, EPI_ISL_704078, EPI_ISL_704080, EPI_ISL_704082, EPI_ISL_704083, EPI_ISL_704085, EPI_ISL_704088, EPI_ISL_704090, EPI_ISL_704091, EPI_ISL_704093, EPI_ISL_704094, EPI_ISL_704096, EPI_ISL_704099, EPI_ISL_704104, EPI_ISL_704106, EPI_ISL_704107, EPI_ISL_704109, EPI_ISL_704110, EPI_ISL_704114, EPI_ISL_704116, EPI_ISL_704121, EPI_ISL_704122, EPI_ISL_704124, EPI_ISL_704125, EPI_ISL_704130, EPI_ISL_704133, EPI_ISL_704136, EPI_ISL_704140, EPI_ISL_704143, EPI_ISL_704144, EPI_ISL_704146, EPI_ISL_704148, EPI_ISL_704152, EPI_ISL_704154, EPI_ISL_704157, EPI_ISL_704162, EPI_ISL_704164, EPI_ISL_704165, EPI_ISL_704169, EPI_ISL_704170, EPI_ISL_704172, EPI_ISL_704173, EPI_ISL_704175, EPI_ISL_704182, EPI_ISL_704183, EPI_ISL_704185, EPI_ISL_704186, EPI_ISL_704189, EPI_ISL_704192, EPI_ISL_704197, EPI_ISL_704200, EPI_ISL_704202, EPI_ISL_704204, EPI_ISL_704205, EPI_ISL_704208, EPI_ISL_704211, EPI_ISL_704213, EPI_ISL_704214, EPI_ISL_704215, EPI_ISL_704220, EPI_ISL_704221, EPI_ISL_704224, EPI_ISL_704226, EPI_ISL_704227, EPI_ISL_704229, EPI_ISL_704230, EPI_ISL_704234, EPI_ISL_704235, EPI_ISL_704237, EPI_ISL_704240, EPI_ISL_704242, EPI_ISL_704245, EPI_ISL_704246, EPI_ISL_704248, EPI_ISL_704251, EPI_ISL_704253, EPI_ISL_704254, EPI_ISL_704258, EPI_ISL_704261, EPI_ISL_704263, EPI_ISL_704264, EPI_ISL_704268, EPI_ISL_704274, EPI_ISL_704275, EPI_ISL_704278, EPI_ISL_704281, EPI_ISL_704282, EPI_ISL_704284, EPI_ISL_704287, EPI_ISL_704288, EPI_ISL_704290, EPI_ISL_704292, EPI_ISL_704293, EPI_ISL_704295, EPI_ISL_704296, EPI_ISL_704298, EPI_ISL_704300, EPI_ISL_704303, EPI_ISL_704306, EPI_ISL_704313, EPI_ISL_704314, EPI_ISL_704316, EPI_ISL_704318, EPI_ISL_704319, EPI_ISL_704323, EPI_ISL_704326, EPI_ISL_704327, EPI_ISL_704330, EPI_ISL_704332, EPI_ISL_704335, EPI_ISL_704337, EPI_ISL_704338, EPI_ISL_704342, EPI_ISL_704343, EPI_ISL_704345, EPI_ISL_704346, EPI_ISL_704348, EPI_ISL_704349, EPI_ISL_704351, EPI_ISL_704352, EPI_ISL_704357, EPI_ISL_704358, EPI_ISL_704360, EPI_ISL_704363, EPI_ISL_704368, EPI_ISL_704370, EPI_ISL_704376, EPI_ISL_704380, EPI_ISL_704381, EPI_ISL_704383, EPI_ISL_704388, EPI_ISL_704391, EPI_ISL_704394, EPI_ISL_704396, EPI_ISL_704400, EPI_ISL_704402, EPI_ISL_704404, EPI_ISL_704405, EPI_ISL_704407, EPI_ISL_704412, EPI_ISL_704415, EPI_ISL_704421, EPI_ISL_704423, EPI_ISL_70442 |                                                                      |                                                                                        |                                                                                                                                                                                                                                                                                                                         |



|                                                                                                                                                                                                                                                                                                                                                                                                                                                                                                                                                                                                                                                                                                                                                                                                                                                                                                                                                                                                                                                                                                                                                                                                                                                                                                                                                                                                                                                                                                                                                                                                                                                                                                                                                                                                                                                                                                                                                                                                                                                |                                                                                                                                                                                                                     |                                                                            |                                                                                                                                                                                                                                                                                                                                                                                                                                                                                                                                                                                                                                                                                         |
|------------------------------------------------------------------------------------------------------------------------------------------------------------------------------------------------------------------------------------------------------------------------------------------------------------------------------------------------------------------------------------------------------------------------------------------------------------------------------------------------------------------------------------------------------------------------------------------------------------------------------------------------------------------------------------------------------------------------------------------------------------------------------------------------------------------------------------------------------------------------------------------------------------------------------------------------------------------------------------------------------------------------------------------------------------------------------------------------------------------------------------------------------------------------------------------------------------------------------------------------------------------------------------------------------------------------------------------------------------------------------------------------------------------------------------------------------------------------------------------------------------------------------------------------------------------------------------------------------------------------------------------------------------------------------------------------------------------------------------------------------------------------------------------------------------------------------------------------------------------------------------------------------------------------------------------------------------------------------------------------------------------------------------------------|---------------------------------------------------------------------------------------------------------------------------------------------------------------------------------------------------------------------|----------------------------------------------------------------------------|-----------------------------------------------------------------------------------------------------------------------------------------------------------------------------------------------------------------------------------------------------------------------------------------------------------------------------------------------------------------------------------------------------------------------------------------------------------------------------------------------------------------------------------------------------------------------------------------------------------------------------------------------------------------------------------------|
| EPI_ISL_704681, EPI_ISL_704683, EPI_ISL_704684, EPI_ISL_704686                                                                                                                                                                                                                                                                                                                                                                                                                                                                                                                                                                                                                                                                                                                                                                                                                                                                                                                                                                                                                                                                                                                                                                                                                                                                                                                                                                                                                                                                                                                                                                                                                                                                                                                                                                                                                                                                                                                                                                                 | Team                                                                                                                                                                                                                |                                                                            |                                                                                                                                                                                                                                                                                                                                                                                                                                                                                                                                                                                                                                                                                         |
| EPI_ISL_704688, EPI_ISL_704691, EPI_ISL_704693, EPI_ISL_704696, EPI_ISL_704697, EPI_ISL_704699, EPI_ISL_704702, EPI_ISL_704705, EPI_ISL_704707, EPI_ISL_704708, EPI_ISL_704713                                                                                                                                                                                                                                                                                                                                                                                                                                                                                                                                                                                                                                                                                                                                                                                                                                                                                                                                                                                                                                                                                                                                                                                                                                                                                                                                                                                                                                                                                                                                                                                                                                                                                                                                                                                                                                                                 |                                                                                                                                                                                                                     |                                                                            |                                                                                                                                                                                                                                                                                                                                                                                                                                                                                                                                                                                                                                                                                         |
| see above                                                                                                                                                                                                                                                                                                                                                                                                                                                                                                                                                                                                                                                                                                                                                                                                                                                                                                                                                                                                                                                                                                                                                                                                                                                                                                                                                                                                                                                                                                                                                                                                                                                                                                                                                                                                                                                                                                                                                                                                                                      | Lighthouse Lab in Cambridge                                                                                                                                                                                         | Wellcome Sanger Institute for the COVID-19 Genomics UK (COG-UK) Consortium | Rob Howes, The Lighthouse Lab in Cambridge and Alex Alderton, Roberto Amato, Sonia Goncalves, Ewan Harrison, David K. Jackson, Ian Johnston, Dominic Kwiatkowski, Cordelia Langford, John Sillitoe on behalf of the Wellcome Sanger Institute COVID-19 Surveillance Team                                                                                                                                                                                                                                                                                                                                                                                                                |
| EPI_ISL_704714                                                                                                                                                                                                                                                                                                                                                                                                                                                                                                                                                                                                                                                                                                                                                                                                                                                                                                                                                                                                                                                                                                                                                                                                                                                                                                                                                                                                                                                                                                                                                                                                                                                                                                                                                                                                                                                                                                                                                                                                                                 | Quadram Institute Bioscience                                                                                                                                                                                        | COVID-19 Genomics UK (COG-UK) Consortium                                   | Dave J. Baker, Gemma L. Kay, Alp Aydin, Thanh Le-Viet, Steven Rudder, Ana P. Tedim, Anastasia Kolyva, Maria Diaz, Leonardo de Oliveira Martins, Nabil-Fareed Alikhan, Lizzie Meadows, Rachael Stanley, Ngozi Elumogo, Muhammed Yasir, Nicholas M. Thomson, Alexander J Trotter, Rachel Gilroy, Samuel Bloomfield, Claire Stuart, Andrew Bell, Reenesh Prakash, Samir Dervisevic, Alison E. Mather, John Wain, Mark Webber, Andrew J. Page, Justin O'Grady                                                                                                                                                                                                                               |
| EPI_ISL_704715, EPI_ISL_704724, EPI_ISL_704726, EPI_ISL_704727, EPI_ISL_704730, EPI_ISL_704732, EPI_ISL_704735, EPI_ISL_704738, EPI_ISL_704740, EPI_ISL_704743, EPI_ISL_704745, EPI_ISL_704753, EPI_ISL_704763, EPI_ISL_704766, EPI_ISL_704767, EPI_ISL_704769, EPI_ISL_704771, EPI_ISL_704773, EPI_ISL_704774, EPI_ISL_704776, EPI_ISL_704779, EPI_ISL_704781, EPI_ISL_704782, EPI_ISL_704784, EPI_ISL_704785, EPI_ISL_704790, EPI_ISL_704792, EPI_ISL_704795, EPI_ISL_704796, EPI_ISL_704801, EPI_ISL_704803, EPI_ISL_704806, EPI_ISL_704808, EPI_ISL_704811, EPI_ISL_704813, EPI_ISL_704814, EPI_ISL_704816, EPI_ISL_704818, EPI_ISL_704819, EPI_ISL_704821, EPI_ISL_704822, EPI_ISL_704824, EPI_ISL_704827, EPI_ISL_704830, EPI_ISL_704832, EPI_ISL_704833                                                                                                                                                                                                                                                                                                                                                                                                                                                                                                                                                                                                                                                                                                                                                                                                                                                                                                                                                                                                                                                                                                                                                                                                                                                                                 |                                                                                                                                                                                                                     |                                                                            |                                                                                                                                                                                                                                                                                                                                                                                                                                                                                                                                                                                                                                                                                         |
| see above                                                                                                                                                                                                                                                                                                                                                                                                                                                                                                                                                                                                                                                                                                                                                                                                                                                                                                                                                                                                                                                                                                                                                                                                                                                                                                                                                                                                                                                                                                                                                                                                                                                                                                                                                                                                                                                                                                                                                                                                                                      | Lighthouse Lab in Cambridge                                                                                                                                                                                         | Wellcome Sanger Institute for the COVID-19 Genomics UK (COG-UK) Consortium | Rob Howes, The Lighthouse Lab in Cambridge and Alex Alderton, Roberto Amato, Sonia Goncalves, Ewan Harrison, David K. Jackson, Ian Johnston, Dominic Kwiatkowski, Cordelia Langford, John Sillitoe on behalf of the Wellcome Sanger Institute COVID-19 Surveillance Team                                                                                                                                                                                                                                                                                                                                                                                                                |
| EPI_ISL_704834                                                                                                                                                                                                                                                                                                                                                                                                                                                                                                                                                                                                                                                                                                                                                                                                                                                                                                                                                                                                                                                                                                                                                                                                                                                                                                                                                                                                                                                                                                                                                                                                                                                                                                                                                                                                                                                                                                                                                                                                                                 | Department of Pathology, University of Cambridge                                                                                                                                                                    | COVID-19 Genomics UK (COG-UK) Consortium                                   | Aminu S. Jahun, Yasmin Chaudhry, Grant Hall, Iliana Georgana, Myra Hosmillo, Martin D. Curran, Malte Pinckert, Surendra Parmar, Ian Goodfellow                                                                                                                                                                                                                                                                                                                                                                                                                                                                                                                                          |
| EPI_ISL_704835, EPI_ISL_704840, EPI_ISL_704841, EPI_ISL_704843, EPI_ISL_704844, EPI_ISL_704849                                                                                                                                                                                                                                                                                                                                                                                                                                                                                                                                                                                                                                                                                                                                                                                                                                                                                                                                                                                                                                                                                                                                                                                                                                                                                                                                                                                                                                                                                                                                                                                                                                                                                                                                                                                                                                                                                                                                                 | Lighthouse Lab in Cambridge                                                                                                                                                                                         | Wellcome Sanger Institute for the COVID-19 Genomics UK (COG-UK) Consortium | Rob Howes, The Lighthouse Lab in Cambridge and Alex Alderton, Roberto Amato, Sonia Goncalves, Ewan Harrison, David K. Jackson, Ian Johnston, Dominic Kwiatkowski, Cordelia Langford, John Sillitoe on behalf of the Wellcome Sanger Institute COVID-19 Surveillance Team                                                                                                                                                                                                                                                                                                                                                                                                                |
| EPI_ISL_704850                                                                                                                                                                                                                                                                                                                                                                                                                                                                                                                                                                                                                                                                                                                                                                                                                                                                                                                                                                                                                                                                                                                                                                                                                                                                                                                                                                                                                                                                                                                                                                                                                                                                                                                                                                                                                                                                                                                                                                                                                                 | Quadram Institute Bioscience                                                                                                                                                                                        | COVID-19 Genomics UK (COG-UK) Consortium                                   | Dave J. Baker, Gemma L. Kay, Alp Aydin, Thanh Le-Viet, Steven Rudder, Ana P. Tedim, Anastasia Kolyva, Maria Diaz, Leonardo de Oliveira Martins, Nabil-Fareed Alikhan, Lizzie Meadows, Rachael Stanley, Ngozi Elumogo, Muhammed Yasir, Nicholas M. Thomson, Alexander J Trotter, Rachel Gilroy, Samuel Bloomfield, Claire Stuart, Andrew Bell, Reenesh Prakash, Samir Dervisevic, Alison E. Mather, John Wain, Mark Webber, Andrew J. Page, Justin O'Grady                                                                                                                                                                                                                               |
| EPI_ISL_704851, EPI_ISL_704856, EPI_ISL_704857, EPI_ISL_704859, EPI_ISL_704860, EPI_ISL_704862, EPI_ISL_704865, EPI_ISL_704867, EPI_ISL_704876, EPI_ISL_704880, EPI_ISL_704881, EPI_ISL_704884, EPI_ISL_704886, EPI_ISL_704888, EPI_ISL_704889, EPI_ISL_704893, EPI_ISL_704894, EPI_ISL_704898, EPI_ISL_704899, EPI_ISL_704902, EPI_ISL_704904                                                                                                                                                                                                                                                                                                                                                                                                                                                                                                                                                                                                                                                                                                                                                                                                                                                                                                                                                                                                                                                                                                                                                                                                                                                                                                                                                                                                                                                                                                                                                                                                                                                                                                 |                                                                                                                                                                                                                     |                                                                            |                                                                                                                                                                                                                                                                                                                                                                                                                                                                                                                                                                                                                                                                                         |
| see above                                                                                                                                                                                                                                                                                                                                                                                                                                                                                                                                                                                                                                                                                                                                                                                                                                                                                                                                                                                                                                                                                                                                                                                                                                                                                                                                                                                                                                                                                                                                                                                                                                                                                                                                                                                                                                                                                                                                                                                                                                      | Lighthouse Lab in Cambridge                                                                                                                                                                                         | Wellcome Sanger Institute for the COVID-19 Genomics UK (COG-UK) Consortium | Rob Howes, The Lighthouse Lab in Cambridge and Alex Alderton, Roberto Amato, Sonia Goncalves, Ewan Harrison, David K. Jackson, Ian Johnston, Dominic Kwiatkowski, Cordelia Langford, John Sillitoe on behalf of the Wellcome Sanger Institute COVID-19 Surveillance Team                                                                                                                                                                                                                                                                                                                                                                                                                |
| EPI_ISL_704905                                                                                                                                                                                                                                                                                                                                                                                                                                                                                                                                                                                                                                                                                                                                                                                                                                                                                                                                                                                                                                                                                                                                                                                                                                                                                                                                                                                                                                                                                                                                                                                                                                                                                                                                                                                                                                                                                                                                                                                                                                 | Liverpool Clinical Laboratories                                                                                                                                                                                     | COVID-19 Genomics UK (COG-UK) Consortium                                   | Sam Haldenby, Anita Lucaci, Steve Paterson, Julian Hiscox, Alistair Darby, M Almsaud, A Alrezaihi, Muhannad Alruwaili, Stuart D Armstrong, Jones Benjamin, Eleanor G Bentley, Anu Chawla, Jordan J Clark, Angela Cowell, Richard Eccles, Isabel Garcia-Dorival, Matthew Gemmell, Alessandro Gerada, PKF Gilmore, Richard Gregory, Ximeng Han, Catherine Hartley, Margaret Hughes, Miren Iturriza-Gomara, James Johnson, L Luu, Jenifer Manson, Charlotte Nelson, Elaine O'Toole, Cassie Olateju, Rebekah Penrice-Randal, Lucille Rainbow, N.P Randle, Trevor Ian Robinson, Parul Sharma, Ghada T Shawli, James P Stewart, Neil Swainston, Ecaterina Vamos, Joanne Watts, Mark Whitehead |
| EPI_ISL_704906, EPI_ISL_704907, EPI_ISL_704912, EPI_ISL_704913                                                                                                                                                                                                                                                                                                                                                                                                                                                                                                                                                                                                                                                                                                                                                                                                                                                                                                                                                                                                                                                                                                                                                                                                                                                                                                                                                                                                                                                                                                                                                                                                                                                                                                                                                                                                                                                                                                                                                                                 | Lighthouse Lab in Cambridge                                                                                                                                                                                         | Wellcome Sanger Institute for the COVID-19 Genomics UK (COG-UK) Consortium | Rob Howes, The Lighthouse Lab in Cambridge and Alex Alderton, Roberto Amato, Sonia Goncalves, Ewan Harrison, David K. Jackson, Ian Johnston, Dominic Kwiatkowski, Cordelia Langford, John Sillitoe on behalf of the Wellcome Sanger Institute COVID-19 Surveillance Team                                                                                                                                                                                                                                                                                                                                                                                                                |
| EPI_ISL_704914                                                                                                                                                                                                                                                                                                                                                                                                                                                                                                                                                                                                                                                                                                                                                                                                                                                                                                                                                                                                                                                                                                                                                                                                                                                                                                                                                                                                                                                                                                                                                                                                                                                                                                                                                                                                                                                                                                                                                                                                                                 | Quadram Institute Bioscience                                                                                                                                                                                        | COVID-19 Genomics UK (COG-UK) Consortium                                   | Dave J. Baker, Gemma L. Kay, Alp Aydin, Thanh Le-Viet, Steven Rudder, Ana P. Tedim, Anastasia Kolyva, Maria Diaz, Leonardo de Oliveira Martins, Nabil-Fareed Alikhan, Lizzie Meadows, Rachael Stanley, Ngozi Elumogo, Muhammed Yasir, Nicholas M. Thomson, Alexander J Trotter, Rachel Gilroy, Samuel Bloomfield, Claire Stuart, Andrew Bell, Reenesh Prakash, Samir Dervisevic, Alison E. Mather, John Wain, Mark Webber, Andrew J. Page, Justin O'Grady                                                                                                                                                                                                                               |
| EPI_ISL_704919, EPI_ISL_704920, EPI_ISL_704922, EPI_ISL_704924, EPI_ISL_704925, EPI_ISL_704927, EPI_ISL_704932, EPI_ISL_704933, EPI_ISL_704936, EPI_ISL_704940, EPI_ISL_704941, EPI_ISL_704943, EPI_ISL_704949, EPI_ISL_704953, EPI_ISL_704956, EPI_ISL_704958, EPI_ISL_704959, EPI_ISL_704961, EPI_ISL_704962, EPI_ISL_704964, EPI_ISL_704967, EPI_ISL_704969, EPI_ISL_704971, EPI_ISL_704975, EPI_ISL_704979, EPI_ISL_704980, EPI_ISL_704985, EPI_ISL_704987, EPI_ISL_704988, EPI_ISL_704990, EPI_ISL_704992, EPI_ISL_704993, EPI_ISL_704995, EPI_ISL_704996, EPI_ISL_704998, EPI_ISL_705000, EPI_ISL_705003, EPI_ISL_705006, EPI_ISL_705009, EPI_ISL_705011, EPI_ISL_705012, EPI_ISL_705016, EPI_ISL_705017, EPI_ISL_705019, EPI_ISL_705020, EPI_ISL_705022, EPI_ISL_705025, EPI_ISL_705027, EPI_ISL_705028, EPI_ISL_705029, EPI_ISL_705031, EPI_ISL_705033, EPI_ISL_705036, EPI_ISL_705037, EPI_ISL_705039, EPI_ISL_705041, EPI_ISL_705042, EPI_ISL_705044, EPI_ISL_705045, EPI_ISL_705047, EPI_ISL_705049, EPI_ISL_705050, EPI_ISL_705052, EPI_ISL_705053, EPI_ISL_705055, EPI_ISL_705057, EPI_ISL_705058, EPI_ISL_705060, EPI_ISL_705063, EPI_ISL_705065, EPI_ISL_705066, EPI_ISL_705068, EPI_ISL_705069, EPI_ISL_705071, EPI_ISL_705073, EPI_ISL_705076, EPI_ISL_705079, EPI_ISL_705080, EPI_ISL_705082, EPI_ISL_705085, EPI_ISL_705087, EPI_ISL_705090, EPI_ISL_705092, EPI_ISL_705093, EPI_ISL_705095, EPI_ISL_705097, EPI_ISL_705100, EPI_ISL_705103, EPI_ISL_705107, EPI_ISL_705109, EPI_ISL_705111, EPI_ISL_705112, EPI_ISL_705114, EPI_ISL_705117, EPI_ISL_705122, EPI_ISL_705123, EPI_ISL_705127, EPI_ISL_705128, EPI_ISL_705130, EPI_ISL_705135, EPI_ISL_705136, EPI_ISL_705138, EPI_ISL_705139, EPI_ISL_705141, EPI_ISL_705142, EPI_ISL_705146, EPI_ISL_705147, EPI_ISL_705151, EPI_ISL_705152, EPI_ISL_705157, EPI_ISL_705159, EPI_ISL_705162, EPI_ISL_705164, EPI_ISL_705165, EPI_ISL_705167, EPI_ISL_705173, EPI_ISL_705175, EPI_ISL_705177, EPI_ISL_705178, EPI_ISL_705181, EPI_ISL_705185, EPI_ISL_705186, EPI_ISL_705188 |                                                                                                                                                                                                                     |                                                                            |                                                                                                                                                                                                                                                                                                                                                                                                                                                                                                                                                                                                                                                                                         |
| see above                                                                                                                                                                                                                                                                                                                                                                                                                                                                                                                                                                                                                                                                                                                                                                                                                                                                                                                                                                                                                                                                                                                                                                                                                                                                                                                                                                                                                                                                                                                                                                                                                                                                                                                                                                                                                                                                                                                                                                                                                                      | Lighthouse Lab in Cambridge                                                                                                                                                                                         | Wellcome Sanger Institute for the COVID-19 Genomics UK (COG-UK) Consortium | Rob Howes, The Lighthouse Lab in Cambridge and Alex Alderton, Roberto Amato, Sonia Goncalves, Ewan Harrison, David K. Jackson, Ian Johnston, Dominic Kwiatkowski, Cordelia Langford, John Sillitoe on behalf of the Wellcome Sanger Institute COVID-19 Surveillance Team                                                                                                                                                                                                                                                                                                                                                                                                                |
| EPI_ISL_705191, EPI_ISL_705192, EPI_ISL_705200                                                                                                                                                                                                                                                                                                                                                                                                                                                                                                                                                                                                                                                                                                                                                                                                                                                                                                                                                                                                                                                                                                                                                                                                                                                                                                                                                                                                                                                                                                                                                                                                                                                                                                                                                                                                                                                                                                                                                                                                 | Lighthouse Lab in Milton Keynes                                                                                                                                                                                     | Wellcome Sanger Institute for the COVID-19 Genomics UK (COG-UK) Consortium | The Lighthouse Lab in Milton Keynes and Alex Alderton, Roberto Amato, Sonia Goncalves, Ewan Harrison, David K. Jackson, Ian Johnston, Dominic Kwiatkowski, Cordelia Langford, John Sillitoe on behalf of the Wellcome Sanger Institute COVID-19 Surveillance Team                                                                                                                                                                                                                                                                                                                                                                                                                       |
| EPI_ISL_705472                                                                                                                                                                                                                                                                                                                                                                                                                                                                                                                                                                                                                                                                                                                                                                                                                                                                                                                                                                                                                                                                                                                                                                                                                                                                                                                                                                                                                                                                                                                                                                                                                                                                                                                                                                                                                                                                                                                                                                                                                                 | University College London Hospital                                                                                                                                                                                  | COVID-19 Genomics UK (COG-UK) Consortium                                   | Judith Heaney, Matthew Byott, Catherine Houlihan, Dan Frampton, Stuart Kirk, Moira Spyer and Eleni Nastouli                                                                                                                                                                                                                                                                                                                                                                                                                                                                                                                                                                             |
| EPI_ISL_705486                                                                                                                                                                                                                                                                                                                                                                                                                                                                                                                                                                                                                                                                                                                                                                                                                                                                                                                                                                                                                                                                                                                                                                                                                                                                                                                                                                                                                                                                                                                                                                                                                                                                                                                                                                                                                                                                                                                                                                                                                                 | Northumbria University / South Tees Hospitals NHS Foundation Trust / North Cumbria Integrated Care NHS Foundation Trust / North Tees and Hartlepool NHS Foundation Trust / Newcastle Hospitals NHS Foundation Trust | COVID-19 Genomics UK (COG-UK) Consortium                                   | Darren L Smith, Andrew Nelson, Matthew Bashton, Greg R Young, Joshua Loh, John Allan, Mohammad A Tariq, Giles S Holt, Gary Black, Wen C Yew, Lynn Dover, Paul Baker, Steve Liggett, Sarah Essex, Jane Greenaway, Debra Padgett, Clive Graham, Garren Scott, Edward Barton, Emma Swindells, Brendan Payne, Jennifer Collins, Yusri Taha, Gary Eltringham                                                                                                                                                                                                                                                                                                                                 |
| EPI_ISL_705536, EPI_ISL_705551, EPI_ISL_705555, EPI_ISL_705557, EPI_ISL_705562                                                                                                                                                                                                                                                                                                                                                                                                                                                                                                                                                                                                                                                                                                                                                                                                                                                                                                                                                                                                                                                                                                                                                                                                                                                                                                                                                                                                                                                                                                                                                                                                                                                                                                                                                                                                                                                                                                                                                                 | Department of Pathology, University of Cambridge                                                                                                                                                                    | COVID-19 Genomics UK (COG-UK) Consortium                                   | Aminu S. Jahun, Yasmin Chaudhry, Grant Hall, Iliana Georgana, Myra Hosmillo, Martin D. Curran, Malte Pinckert, Surendra Parmar, Ian Goodfellow                                                                                                                                                                                                                                                                                                                                                                                                                                                                                                                                          |
| EPI_ISL_705645, EPI_ISL_705652, EPI_ISL_705658, EPI_ISL_705659, EPI_ISL_705663, EPI_ISL_705664, EPI_ISL_705674, EPI_ISL_705684, EPI_ISL_705699, EPI_ISL_705701, EPI_ISL_705702, EPI_ISL_705706, EPI_ISL_705707, EPI_ISL_705708, EPI_ISL_705712, EPI_ISL_705726, EPI_ISL_705730                                                                                                                                                                                                                                                                                                                                                                                                                                                                                                                                                                                                                                                                                                                                                                                                                                                                                                                                                                                                                                                                                                                                                                                                                                                                                                                                                                                                                                                                                                                                                                                                                                                                                                                                                                 |                                                                                                                                                                                                                     |                                                                            |                                                                                                                                                                                                                                                                                                                                                                                                                                                                                                                                                                                                                                                                                         |
| see above                                                                                                                                                                                                                                                                                                                                                                                                                                                                                                                                                                                                                                                                                                                                                                                                                                                                                                                                                                                                                                                                                                                                                                                                                                                                                                                                                                                                                                                                                                                                                                                                                                                                                                                                                                                                                                                                                                                                                                                                                                      | West of Scotland Specialist Virology Centre, NHSGGC / MRC-University of Glasgow Centre for Virus Research                                                                                                           | COVID-19 Genomics UK (COG-UK) Consortium                                   | Ana da Silva Filipe, Natasha Johnson, Kathy Smollett, Daniel Mair, Stephen Carmichael, Alice Broos, Lily Tong, Jenna Nichols, Kyriaki Nomikou; Sarah McDonald; Richard Orton, Joseph Hughes, Sreenu Vattipally, David L Robertson; Alasdair MacLean, Rory Gunson; Sharif Shaaban, Matthew Holden; Rachel Blacow, Guy Mollett, Kathy Li, James Shepherd, Antonia Ho, Emma Thomson                                                                                                                                                                                                                                                                                                        |
| EPI_ISL_705735, EPI_ISL_705736, EPI_ISL_705739, EPI_ISL_705740, EPI_ISL_705743, EPI_ISL_705744, EPI_ISL_705745, EPI_ISL_705746, EPI_ISL_705748, EPI_ISL_705749, EPI_ISL_705775, EPI_ISL_705777, EPI_ISL_705780, EPI_ISL_705781, EPI_ISL_705782, EPI_ISL_705784                                                                                                                                                                                                                                                                                                                                                                                                                                                                                                                                                                                                                                                                                                                                                                                                                                                                                                                                                                                                                                                                                                                                                                                                                                                                                                                                                                                                                                                                                                                                                                                                                                                                                                                                                                                 |                                                                                                                                                                                                                     |                                                                            |                                                                                                                                                                                                                                                                                                                                                                                                                                                                                                                                                                                                                                                                                         |
| see above                                                                                                                                                                                                                                                                                                                                                                                                                                                                                                                                                                                                                                                                                                                                                                                                                                                                                                                                                                                                                                                                                                                                                                                                                                                                                                                                                                                                                                                                                                                                                                                                                                                                                                                                                                                                                                                                                                                                                                                                                                      | Virology Department, Royal Infirmary of Edinburgh, NHS Lothian / School of Biological Sciences, University of Edinburgh / Institute of Genetics and Molecular Medicine, University of Edinburgh                     | COVID-19 Genomics UK (COG-UK) Consortium                                   | McHugh M, Dewar R, Rooke S, Gallagher M, Balcaza C, O'Toole Á, Scher E, Hill V, McCrone JT, Colquhoun R, Yu X, Jackson B, Rambaut A, Williams TC, Templeton K                                                                                                                                                                                                                                                                                                                                                                                                                                                                                                                           |
| EPI_ISL_705929, EPI_ISL_705931                                                                                                                                                                                                                                                                                                                                                                                                                                                                                                                                                                                                                                                                                                                                                                                                                                                                                                                                                                                                                                                                                                                                                                                                                                                                                                                                                                                                                                                                                                                                                                                                                                                                                                                                                                                                                                                                                                                                                                                                                 | Liverpool Clinical Laboratories                                                                                                                                                                                     | COVID-19 Genomics UK (COG-UK) Consortium                                   | Sam Haldenby, Anita Lucaci, Steve Paterson, Julian Hiscox, Alistair Darby, M Almsaud, A Alrezaihi, Muhannad Alruwaili, Stuart D Armstrong, Jones Benjamin, Eleanor G Bentley, Anu Chawla, Jordan J Clark, Angela Cowell, Richard Eccles, Isabel Garcia-Dorival, Matthew Gemmell, Alessandro Gerada, PKF Gilmore, Richard Gregory, Ximeng Han, Catherine Hartley, Margaret Hughes, Miren Iturriza-Gomara, James Johnson, L Luu, Jenifer Manson, Charlotte Nelson, Elaine O'Toole, Cassie Olateju, Rebekah Penrice-Randal, Lucille Rainbow, N.P Randle, Trevor Ian Robinson, Parul Sharma, Ghada T Shawli, James P Stewart, Neil Swainston, Ecaterina Vamos, Joanne Watts, Mark Whitehead |
| EPI_ISL_705942, EPI_ISL_705943, EPI_ISL_705944, EPI_ISL_705946, EPI_ISL_705947, EPI_ISL_705948, EPI_ISL_705949, EPI_ISL_705950, EPI_ISL_705952, EPI_ISL_705953, EPI_ISL_705954, EPI_ISL_705955                                                                                                                                                                                                                                                                                                                                                                                                                                                                                                                                                                                                                                                                                                                                                                                                                                                                                                                                                                                                                                                                                                                                                                                                                                                                                                                                                                                                                                                                                                                                                                                                                                                                                                                                                                                                                                                 |                                                                                                                                                                                                                     |                                                                            |                                                                                                                                                                                                                                                                                                                                                                                                                                                                                                                                                                                                                                                                                         |
| see above                                                                                                                                                                                                                                                                                                                                                                                                                                                                                                                                                                                                                                                                                                                                                                                                                                                                                                                                                                                                                                                                                                                                                                                                                                                                                                                                                                                                                                                                                                                                                                                                                                                                                                                                                                                                                                                                                                                                                                                                                                      | University College London Hospital                                                                                                                                                                                  | COVID-19 Genomics UK (COG-UK) Consortium                                   | Judith Heaney, Matthew Byott, Catherine Houlihan, Dan Frampton, Stuart Kirk, Moira Spyer and Eleni Nastouli                                                                                                                                                                                                                                                                                                                                                                                                                                                                                                                                                                             |
| EPI_ISL_706284, EPI_ISL_706312, EPI_ISL_706320, EPI_ISL_706321, EPI_ISL_706328, EPI_ISL_706331, EPI_ISL_706334, EPI_ISL_706335, EPI_ISL_706337, EPI_ISL_706338, EPI_ISL_706341, EPI_ISL_706343, EPI_ISL_706344, EPI_ISL_706347, EPI_ISL_706349, EPI_ISL_706350                                                                                                                                                                                                                                                                                                                                                                                                                                                                                                                                                                                                                                                                                                                                                                                                                                                                                                                                                                                                                                                                                                                                                                                                                                                                                                                                                                                                                                                                                                                                                                                                                                                                                                                                                                                 |                                                                                                                                                                                                                     |                                                                            |                                                                                                                                                                                                                                                                                                                                                                                                                                                                                                                                                                                                                                                                                         |

|                                                                                                                                                                                                                                                                                                                                                                                                                                                                                                                                                                                                                                                                                                                                                                                                                                                                                                                                                                                                                                                                                                                                                                                                                                                                                                                                                                                                                                                                                                                                                                                                                                                                                                                                                                                                                                                                                                                                                                                                                                                                                                                                                                                                                                                                                                                                                                                                                                                                                                |                                                                                                                                                                                                                     |                                                                                                                                                                                                                                                                                                                                                                          |                                                                                                                                                                                                                                                                                                                                                                                                                                                           |
|------------------------------------------------------------------------------------------------------------------------------------------------------------------------------------------------------------------------------------------------------------------------------------------------------------------------------------------------------------------------------------------------------------------------------------------------------------------------------------------------------------------------------------------------------------------------------------------------------------------------------------------------------------------------------------------------------------------------------------------------------------------------------------------------------------------------------------------------------------------------------------------------------------------------------------------------------------------------------------------------------------------------------------------------------------------------------------------------------------------------------------------------------------------------------------------------------------------------------------------------------------------------------------------------------------------------------------------------------------------------------------------------------------------------------------------------------------------------------------------------------------------------------------------------------------------------------------------------------------------------------------------------------------------------------------------------------------------------------------------------------------------------------------------------------------------------------------------------------------------------------------------------------------------------------------------------------------------------------------------------------------------------------------------------------------------------------------------------------------------------------------------------------------------------------------------------------------------------------------------------------------------------------------------------------------------------------------------------------------------------------------------------------------------------------------------------------------------------------------------------|---------------------------------------------------------------------------------------------------------------------------------------------------------------------------------------------------------------------|--------------------------------------------------------------------------------------------------------------------------------------------------------------------------------------------------------------------------------------------------------------------------------------------------------------------------------------------------------------------------|-----------------------------------------------------------------------------------------------------------------------------------------------------------------------------------------------------------------------------------------------------------------------------------------------------------------------------------------------------------------------------------------------------------------------------------------------------------|
| see above                                                                                                                                                                                                                                                                                                                                                                                                                                                                                                                                                                                                                                                                                                                                                                                                                                                                                                                                                                                                                                                                                                                                                                                                                                                                                                                                                                                                                                                                                                                                                                                                                                                                                                                                                                                                                                                                                                                                                                                                                                                                                                                                                                                                                                                                                                                                                                                                                                                                                      | Northumbria University / South Tees Hospitals NHS Foundation Trust / North Cumbria Integrated Care NHS Foundation Trust / North Tees and Hartlepool NHS Foundation Trust / Newcastle Hospitals NHS Foundation Trust | COVID-19 Genomics UK (COG-UK) Consortium                                                                                                                                                                                                                                                                                                                                 | Darren L Smith,Andrew Nelson,Matthew Bashton,Greg R Young,Joshua Loh,John Allan,Mohammad A Tariq,Giles S Holt,Gary Black,Wen C Yew,Lynn Dover,Paul Baker,Steve Liggett,Sarah Essex,Jane Greenaway,Debra Padgett,Olive Graham,Garren Scott,Edward Barton,Emma Swindells,Brendan Payne,Jennifer Collins, Yusri Taha,Gary Eltringham                                                                                                                         |
| EPI_ISL_706364, EPI_ISL_706367                                                                                                                                                                                                                                                                                                                                                                                                                                                                                                                                                                                                                                                                                                                                                                                                                                                                                                                                                                                                                                                                                                                                                                                                                                                                                                                                                                                                                                                                                                                                                                                                                                                                                                                                                                                                                                                                                                                                                                                                                                                                                                                                                                                                                                                                                                                                                                                                                                                                 | Quadram Institute Bioscience                                                                                                                                                                                        | COVID-19 Genomics UK (COG-UK) Consortium                                                                                                                                                                                                                                                                                                                                 | Dave J. Baker, Gemma L. Kay, Alp Aydin, Thanh Le-Viet, Steven Rudder, Ana P. Tedim, Anastasia Kolyva, Maria Diaz, Leonardo de Oliveira Martins, Nabil-Fareed Alikhan, Lizzie Meadows, Rachael Stanley, Ngozi Elumogo, Muhammed Yasir, Nicholas M. Thomson, Alexander J Trotter, Rachel Gilroy, Samuel Bloomfield, Claire Stuart, Andrew Bell, Reenesh Prakash, Samir Dervisevic, Alison E. Mather, John Wain, Mark Webber, Andrew J. Page, Justin O'Grady |
| EPI_ISL_706428                                                                                                                                                                                                                                                                                                                                                                                                                                                                                                                                                                                                                                                                                                                                                                                                                                                                                                                                                                                                                                                                                                                                                                                                                                                                                                                                                                                                                                                                                                                                                                                                                                                                                                                                                                                                                                                                                                                                                                                                                                                                                                                                                                                                                                                                                                                                                                                                                                                                                 | Queens Medical Centre, Clinical Microbiology Department / DeepSeq Nottingham                                                                                                                                        | COVID-19 Genomics UK (COG-UK) Consortium                                                                                                                                                                                                                                                                                                                                 | Gemma Clark, Wendy Smith, Manjinder Khakh, Vicki M Fleming, Michelle M Lister, Hannah Howson-Wells, Jonathan Ball, Patrick McClure, Joseph Chappell, Theocharis Tsoleiridis, Nadine Holmes, Matthew Carlisle, Christopher Moore, Fei Sang, Johnny Debebe, Victoria Wright, Matthew Loose                                                                                                                                                                  |
| EPI_ISL_706582, EPI_ISL_706583, EPI_ISL_706596, EPI_ISL_706602, EPI_ISL_706622, EPI_ISL_706633, EPI_ISL_706639, EPI_ISL_706641, EPI_ISL_706644, EPI_ISL_706646, EPI_ISL_706776, EPI_ISL_706786, EPI_ISL_706789, EPI_ISL_706807, EPI_ISL_706809, EPI_ISL_706813, EPI_ISL_706816, EPI_ISL_706818, EPI_ISL_706822, EPI_ISL_706827, EPI_ISL_706833, EPI_ISL_706834, EPI_ISL_706837, EPI_ISL_706848, EPI_ISL_706851, EPI_ISL_706861, EPI_ISL_706862                                                                                                                                                                                                                                                                                                                                                                                                                                                                                                                                                                                                                                                                                                                                                                                                                                                                                                                                                                                                                                                                                                                                                                                                                                                                                                                                                                                                                                                                                                                                                                                                                                                                                                                                                                                                                                                                                                                                                                                                                                                 |                                                                                                                                                                                                                     |                                                                                                                                                                                                                                                                                                                                                                          |                                                                                                                                                                                                                                                                                                                                                                                                                                                           |
| see above                                                                                                                                                                                                                                                                                                                                                                                                                                                                                                                                                                                                                                                                                                                                                                                                                                                                                                                                                                                                                                                                                                                                                                                                                                                                                                                                                                                                                                                                                                                                                                                                                                                                                                                                                                                                                                                                                                                                                                                                                                                                                                                                                                                                                                                                                                                                                                                                                                                                                      | Wales Specialist Virology Centre Sequencing lab: Pathogen Genomics Unit                                                                                                                                             | COVID-19 Genomics UK (COG-UK) Consortium                                                                                                                                                                                                                                                                                                                                 | Catherine Moore, Johnathan Evans, Laura Gifford, Malorie Perry, Simon Cottrell, Angela Marchbank, Alec Birchley, Alexander Adams, Amy Gaskin, Bree Gatica-Wilcox, Jason Coombes, Joel Southgate, Lauren Gilbert, Lee Graham, Nicole Pacchiarini, Sara Kumziene-Summerhayes, Sarah Taylor, Sophie Jones, Sara Rey, Matthew Bull, Joanne Watkins, Sally Corden, Tom Connor                                                                                  |
| EPI_ISL_706988, EPI_ISL_706999, EPI_ISL_707006                                                                                                                                                                                                                                                                                                                                                                                                                                                                                                                                                                                                                                                                                                                                                                                                                                                                                                                                                                                                                                                                                                                                                                                                                                                                                                                                                                                                                                                                                                                                                                                                                                                                                                                                                                                                                                                                                                                                                                                                                                                                                                                                                                                                                                                                                                                                                                                                                                                 | Virology Department, Sheffield Teaching Hospitals NHS Foundation Trust/Department of Infection, Immunity and Cardiovascular Disease, The Medical School, University of Sheffield                                    | COVID-19 Genomics UK (COG-UK) Consortium                                                                                                                                                                                                                                                                                                                                 | Thushan de Silva, Matthew Parker, Nikki Smith, Adri Agyal, Rebecca Brown, Luke Green, Rachel Tucker, Paul Parsons, Danielle Groves, Katie Johnson, Laura Carrilero, Alex Keeley, Dave Partridge, Matthew Wyles, Benjamin Lindsey, Mehmet Yavuz, Mohammad Raza, Cariad Evans                                                                                                                                                                               |
| EPI_ISL_707697, EPI_ISL_707698, EPI_ISL_707699, EPI_ISL_707700                                                                                                                                                                                                                                                                                                                                                                                                                                                                                                                                                                                                                                                                                                                                                                                                                                                                                                                                                                                                                                                                                                                                                                                                                                                                                                                                                                                                                                                                                                                                                                                                                                                                                                                                                                                                                                                                                                                                                                                                                                                                                                                                                                                                                                                                                                                                                                                                                                 | 1-Laboratory of Microbiology, National Reference Lab, Charles Nicolle Hospital; 2-University of Tunis ElManar, Faculty of Medicine of Tunis, LR99ES09, Tunis, Tunisia                                               | 1-Clinical and Experimental Pharmacology Lab, LR16SP02, National Center of Pharmacovigilance, University of Tunis El Manar, Tunis, Tunisia. 2-Neurodegenerative diseases and psychiatric troubles, LR18SP03, Razi Hospital, University of Tunis El Manar, Tunis, Tunisia. 3- Ministry of Health, National Observatory of New and Emerging Diseases, 1006, Tunis, Tunisia | Ilhem Boutiba-Ben Boubaker, Sameh Trabelsi, Nissaf Ben Alaya, Maher Kharrat, Alia Ben Kahla, Jalila Ben Khellil, Salma Abid, Sana Ferjani, Mouna Ben Sassi, Mouna Safer, Zaineab Hamzaoui, Habiba Ben Romdhane, Souissi Amira, Rouaa Ben Othman, Hanen El Jebari, Asma Ferjani, Gaies Emna, Riadh Daghfous, Riadh Gouider.                                                                                                                                |
| EPI_ISL_708136, EPI_ISL_708137, EPI_ISL_708138, EPI_ISL_708139                                                                                                                                                                                                                                                                                                                                                                                                                                                                                                                                                                                                                                                                                                                                                                                                                                                                                                                                                                                                                                                                                                                                                                                                                                                                                                                                                                                                                                                                                                                                                                                                                                                                                                                                                                                                                                                                                                                                                                                                                                                                                                                                                                                                                                                                                                                                                                                                                                 | Medical Microbiology Unit, Department for Laboratory Medicine, Drammen Hospital, Vestre Viken Health Trust,                                                                                                         | Norwegian Institute of Public Health, Department of Virology                                                                                                                                                                                                                                                                                                             | Kathrine Stene-Johansen, Kamilla Heddeland Instefjord, Hilde Elshaug, Marie Paulsen Madsen, Rasmus Riis Kopperud, Hilde Vollan, Karoline Bragstad, Olav Hungnes                                                                                                                                                                                                                                                                                           |
| EPI_ISL_708169, EPI_ISL_708170                                                                                                                                                                                                                                                                                                                                                                                                                                                                                                                                                                                                                                                                                                                                                                                                                                                                                                                                                                                                                                                                                                                                                                                                                                                                                                                                                                                                                                                                                                                                                                                                                                                                                                                                                                                                                                                                                                                                                                                                                                                                                                                                                                                                                                                                                                                                                                                                                                                                 | Norwegian Institute of Public Health, Department of Virology                                                                                                                                                        | Norwegian Institute of Public Health, Department of Virology                                                                                                                                                                                                                                                                                                             | Kathrine Stene-Johansen, Kamilla Heddeland Instefjord, Hilde Elshaug, Marie Paulsen Madsen, Rasmus Riis Kopperud, Hilde Vollan, Karoline Bragstad, Olav Hungnes                                                                                                                                                                                                                                                                                           |
| EPI_ISL_708172, EPI_ISL_708173, EPI_ISL_708174, EPI_ISL_708175                                                                                                                                                                                                                                                                                                                                                                                                                                                                                                                                                                                                                                                                                                                                                                                                                                                                                                                                                                                                                                                                                                                                                                                                                                                                                                                                                                                                                                                                                                                                                                                                                                                                                                                                                                                                                                                                                                                                                                                                                                                                                                                                                                                                                                                                                                                                                                                                                                 | Oslo University Hospital, Department of Medical Microbiology                                                                                                                                                        | Norwegian Institute of Public Health, Department of Virology                                                                                                                                                                                                                                                                                                             | Kathrine Stene-Johansen, Kamilla Heddeland Instefjord, Hilde Elshaug, Marie Paulsen Madsen, Rasmus Riis Kopperud, Hilde Vollan, Karoline Bragstad, Olav Hungnes                                                                                                                                                                                                                                                                                           |
| EPI_ISL_708181                                                                                                                                                                                                                                                                                                                                                                                                                                                                                                                                                                                                                                                                                                                                                                                                                                                                                                                                                                                                                                                                                                                                                                                                                                                                                                                                                                                                                                                                                                                                                                                                                                                                                                                                                                                                                                                                                                                                                                                                                                                                                                                                                                                                                                                                                                                                                                                                                                                                                 | Norwegian Institute of Public Health, Department of Virology                                                                                                                                                        | Norwegian Institute of Public Health, Department of Virology                                                                                                                                                                                                                                                                                                             | Kathrine Stene-Johansen, Kamilla Heddeland Instefjord, Hilde Elshaug, Marie Paulsen Madsen, Rasmus Riis Kopperud, Hilde Vollan, Karoline Bragstad, Olav Hungnes                                                                                                                                                                                                                                                                                           |
| EPI_ISL_708214                                                                                                                                                                                                                                                                                                                                                                                                                                                                                                                                                                                                                                                                                                                                                                                                                                                                                                                                                                                                                                                                                                                                                                                                                                                                                                                                                                                                                                                                                                                                                                                                                                                                                                                                                                                                                                                                                                                                                                                                                                                                                                                                                                                                                                                                                                                                                                                                                                                                                 | Michigan Department of Health and Human Services, Bureau of Laboratories                                                                                                                                            | Michigan Department of Health and Human Services, Bureau of Laboratories                                                                                                                                                                                                                                                                                                 | Blankenship HM, Riner D, Soehnlén MK                                                                                                                                                                                                                                                                                                                                                                                                                      |
| EPI_ISL_708458, EPI_ISL_708459                                                                                                                                                                                                                                                                                                                                                                                                                                                                                                                                                                                                                                                                                                                                                                                                                                                                                                                                                                                                                                                                                                                                                                                                                                                                                                                                                                                                                                                                                                                                                                                                                                                                                                                                                                                                                                                                                                                                                                                                                                                                                                                                                                                                                                                                                                                                                                                                                                                                 | Department of Clinical Microbiology                                                                                                                                                                                 | GIGA Medical Genomics                                                                                                                                                                                                                                                                                                                                                    | Keith Durkin, Maria Artesi, Justine Defêche, Gilles Darcis, Michel Moutschen, Sébastien Bontems, Raphaël Boreux, Bouchra Boujemla, Cécile Meex, Pierrette Melin, Marie-Pierre Hayette, Vincent Bours                                                                                                                                                                                                                                                      |
| EPI_ISL_708485, EPI_ISL_708486, EPI_ISL_708487, EPI_ISL_708488, EPI_ISL_708489, EPI_ISL_708491, EPI_ISL_708492, EPI_ISL_708493, EPI_ISL_708494, EPI_ISL_708495                                                                                                                                                                                                                                                                                                                                                                                                                                                                                                                                                                                                                                                                                                                                                                                                                                                                                                                                                                                                                                                                                                                                                                                                                                                                                                                                                                                                                                                                                                                                                                                                                                                                                                                                                                                                                                                                                                                                                                                                                                                                                                                                                                                                                                                                                                                                 | Minnesota Department of Health, Public Health Laboratory                                                                                                                                                            | Minnesota Department of Health, Public Health Laboratory                                                                                                                                                                                                                                                                                                                 | Alexandra Lorentz, Jacob Garfin, Matt Plumb, and Xiong Wang                                                                                                                                                                                                                                                                                                                                                                                               |
| EPI_ISL_708530                                                                                                                                                                                                                                                                                                                                                                                                                                                                                                                                                                                                                                                                                                                                                                                                                                                                                                                                                                                                                                                                                                                                                                                                                                                                                                                                                                                                                                                                                                                                                                                                                                                                                                                                                                                                                                                                                                                                                                                                                                                                                                                                                                                                                                                                                                                                                                                                                                                                                 | Secretaria Municipal de Saude de Fernandópolis                                                                                                                                                                      | Instituto Adolfo Lutz, Interdisciplinary Procedures Center, Strategic Laboratory                                                                                                                                                                                                                                                                                         | Claudio Tavares Sacchi, Claudia Regina Gonçalves, Erica Valessa Ramos Gomes, Carlos Henrique Camargo, Karoline Rodrigues Campos, Fernanda Modesto Tolentino Binhardi, Maricelia Navarro Pinheiro Flores, Marcia Maria Costa Nunes Soares, Janaina Other Martins Montanha                                                                                                                                                                                  |
| EPI_ISL_708844, EPI_ISL_708848, EPI_ISL_708849, EPI_ISL_708856, EPI_ISL_708857, EPI_ISL_708858, EPI_ISL_708862, EPI_ISL_708869, EPI_ISL_708871, EPI_ISL_708879, EPI_ISL_708889, EPI_ISL_708896, EPI_ISL_708897, EPI_ISL_708898, EPI_ISL_708900, EPI_ISL_708908, EPI_ISL_708913, EPI_ISL_708916, EPI_ISL_708920, EPI_ISL_708963, EPI_ISL_708969, EPI_ISL_708975, EPI_ISL_708979, EPI_ISL_708983, EPI_ISL_708984, EPI_ISL_708986                                                                                                                                                                                                                                                                                                                                                                                                                                                                                                                                                                                                                                                                                                                                                                                                                                                                                                                                                                                                                                                                                                                                                                                                                                                                                                                                                                                                                                                                                                                                                                                                                                                                                                                                                                                                                                                                                                                                                                                                                                                                 |                                                                                                                                                                                                                     |                                                                                                                                                                                                                                                                                                                                                                          |                                                                                                                                                                                                                                                                                                                                                                                                                                                           |
| see above                                                                                                                                                                                                                                                                                                                                                                                                                                                                                                                                                                                                                                                                                                                                                                                                                                                                                                                                                                                                                                                                                                                                                                                                                                                                                                                                                                                                                                                                                                                                                                                                                                                                                                                                                                                                                                                                                                                                                                                                                                                                                                                                                                                                                                                                                                                                                                                                                                                                                      | Lighthouse Lab in Milton Keynes                                                                                                                                                                                     | Wellcome Sanger Institute for the COVID-19 Genomics UK (COG-UK) Consortium                                                                                                                                                                                                                                                                                               | The Lighthouse Lab in Milton Keynes and Alex Alderton, Roberto Amato, Sonia Goncalves, Ewan Harrison, David K. Jackson, Ian Johnston, Dominic Kwiatkowski, Cordelia Langford, John Sillitoe on behalf of the Wellcome Sanger Institute COVID-19 Surveillance Team                                                                                                                                                                                         |
| EPI_ISL_709048                                                                                                                                                                                                                                                                                                                                                                                                                                                                                                                                                                                                                                                                                                                                                                                                                                                                                                                                                                                                                                                                                                                                                                                                                                                                                                                                                                                                                                                                                                                                                                                                                                                                                                                                                                                                                                                                                                                                                                                                                                                                                                                                                                                                                                                                                                                                                                                                                                                                                 | Lighthouse Lab in Glasgow                                                                                                                                                                                           | Wellcome Sanger Institute for the COVID-19 Genomics UK (COG-UK) Consortium                                                                                                                                                                                                                                                                                               | Harper VanSteenhouse, Yumi Kasai, David Gray, Carol Clugston, Anna Dominiczak and Alex Alderton, Roberto Amato, Sonia Goncalves, Ewan Harrison, David K. Jackson, Ian Johnston, Dominic Kwiatkowski, Cordelia Langford, John Sillitoe on behalf of the Wellcome Sanger Institute COVID-19 Surveillance Team                                                                                                                                               |
| EPI_ISL_709569, EPI_ISL_709571, EPI_ISL_709572, EPI_ISL_709573, EPI_ISL_709574, EPI_ISL_709575, EPI_ISL_709576, EPI_ISL_709577, EPI_ISL_709578, EPI_ISL_709579, EPI_ISL_709582, EPI_ISL_709583, EPI_ISL_709584, EPI_ISL_709585, EPI_ISL_709586, EPI_ISL_709588, EPI_ISL_709589, EPI_ISL_709590, EPI_ISL_709591, EPI_ISL_709592, EPI_ISL_709594, EPI_ISL_709596, EPI_ISL_709597, EPI_ISL_709598, EPI_ISL_709600, EPI_ISL_709602, EPI_ISL_709603, EPI_ISL_709605, EPI_ISL_709607, EPI_ISL_709608, EPI_ISL_709609, EPI_ISL_709610, EPI_ISL_709613, EPI_ISL_709614, EPI_ISL_709615, EPI_ISL_709617, EPI_ISL_709618, EPI_ISL_709619, EPI_ISL_709620, EPI_ISL_709621, EPI_ISL_709626, EPI_ISL_709629, EPI_ISL_709632, EPI_ISL_709633, EPI_ISL_709637, EPI_ISL_709640, EPI_ISL_709643, EPI_ISL_709644, EPI_ISL_709645, EPI_ISL_709646, EPI_ISL_709647, EPI_ISL_709649, EPI_ISL_709650, EPI_ISL_709653, EPI_ISL_709654, EPI_ISL_709655, EPI_ISL_709657, EPI_ISL_709658, EPI_ISL_709659, EPI_ISL_709660, EPI_ISL_709661, EPI_ISL_709662, EPI_ISL_709663, EPI_ISL_709664, EPI_ISL_709665, EPI_ISL_709666, EPI_ISL_709667, EPI_ISL_709671, EPI_ISL_709673, EPI_ISL_709674, EPI_ISL_709675, EPI_ISL_709676, EPI_ISL_709678, EPI_ISL_709679, EPI_ISL_709680, EPI_ISL_709681, EPI_ISL_709683, EPI_ISL_709684, EPI_ISL_709686, EPI_ISL_709688, EPI_ISL_709689, EPI_ISL_709690, EPI_ISL_709691, EPI_ISL_709693, EPI_ISL_709694, EPI_ISL_709696, EPI_ISL_709697, EPI_ISL_709698, EPI_ISL_709700, EPI_ISL_709702, EPI_ISL_709703, EPI_ISL_709705, EPI_ISL_709709, EPI_ISL_709711, EPI_ISL_709713, EPI_ISL_709714, EPI_ISL_709716, EPI_ISL_709717, EPI_ISL_709719, EPI_ISL_709720, EPI_ISL_709721, EPI_ISL_709723, EPI_ISL_709724, EPI_ISL_709728, EPI_ISL_709730, EPI_ISL_709731, EPI_ISL_709733, EPI_ISL_709734, EPI_ISL_709738, EPI_ISL_709739, EPI_ISL_709742, EPI_ISL_709743, EPI_ISL_709744, EPI_ISL_709747, EPI_ISL_709748, EPI_ISL_709749, EPI_ISL_709750, EPI_ISL_709751, EPI_ISL_709753, EPI_ISL_709754, EPI_ISL_709756, EPI_ISL_709757, EPI_ISL_709758, EPI_ISL_709759, EPI_ISL_709762, EPI_ISL_709763, EPI_ISL_709764, EPI_ISL_709769, EPI_ISL_709770, EPI_ISL_709771, EPI_ISL_709774, EPI_ISL_709775, EPI_ISL_709777, EPI_ISL_709779, EPI_ISL_709780, EPI_ISL_709781, EPI_ISL_709782, EPI_ISL_709783, EPI_ISL_709784, EPI_ISL_709785, EPI_ISL_709786, EPI_ISL_709787, EPI_ISL_709788, EPI_ISL_709790, EPI_ISL_709791, EPI_ISL_709792, EPI_ISL_709793, EPI_ISL_709794, EPI_ISL_709795, EPI_ISL_709796 |                                                                                                                                                                                                                     |                                                                                                                                                                                                                                                                                                                                                                          |                                                                                                                                                                                                                                                                                                                                                                                                                                                           |
| see above                                                                                                                                                                                                                                                                                                                                                                                                                                                                                                                                                                                                                                                                                                                                                                                                                                                                                                                                                                                                                                                                                                                                                                                                                                                                                                                                                                                                                                                                                                                                                                                                                                                                                                                                                                                                                                                                                                                                                                                                                                                                                                                                                                                                                                                                                                                                                                                                                                                                                      | Lighthouse Lab in Milton Keynes                                                                                                                                                                                     | Wellcome Sanger Institute for the COVID-19 Genomics UK (COG-UK) Consortium                                                                                                                                                                                                                                                                                               | The Lighthouse Lab in Milton Keynes and Alex Alderton, Roberto Amato, Sonia Goncalves, Ewan Harrison, David K. Jackson, Ian Johnston, Dominic Kwiatkowski, Cordelia Langford, John Sillitoe on behalf of the Wellcome Sanger Institute COVID-19 Surveillance Team                                                                                                                                                                                         |
| EPI_ISL_709800                                                                                                                                                                                                                                                                                                                                                                                                                                                                                                                                                                                                                                                                                                                                                                                                                                                                                                                                                                                                                                                                                                                                                                                                                                                                                                                                                                                                                                                                                                                                                                                                                                                                                                                                                                                                                                                                                                                                                                                                                                                                                                                                                                                                                                                                                                                                                                                                                                                                                 | Lighthouse Lab in Glasgow                                                                                                                                                                                           | Wellcome Sanger Institute for the COVID-19 Genomics UK (COG-UK) Consortium                                                                                                                                                                                                                                                                                               | Harper VanSteenhouse, Yumi Kasai, David Gray, Carol Clugston, Anna Dominiczak and Alex Alderton, Roberto Amato, Sonia Goncalves, Ewan Harrison, David K. Jackson, Ian Johnston, Dominic Kwiatkowski, Cordelia Langford, John Sillitoe on behalf of the Wellcome Sanger Institute COVID-19 Surveillance Team                                                                                                                                               |
| EPI_ISL_709802                                                                                                                                                                                                                                                                                                                                                                                                                                                                                                                                                                                                                                                                                                                                                                                                                                                                                                                                                                                                                                                                                                                                                                                                                                                                                                                                                                                                                                                                                                                                                                                                                                                                                                                                                                                                                                                                                                                                                                                                                                                                                                                                                                                                                                                                                                                                                                                                                                                                                 | Lighthouse Lab in Milton Keynes                                                                                                                                                                                     | Wellcome Sanger Institute for the COVID-19 Genomics UK (COG-UK) Consortium                                                                                                                                                                                                                                                                                               | The Lighthouse Lab in Milton Keynes and Alex Alderton, Roberto Amato, Sonia Goncalves, Ewan Harrison, David K. Jackson, Ian Johnston, Dominic Kwiatkowski, Cordelia Langford, John Sillitoe on behalf of the Wellcome Sanger Institute COVID-19 Surveillance Team                                                                                                                                                                                         |
| EPI_ISL_709805                                                                                                                                                                                                                                                                                                                                                                                                                                                                                                                                                                                                                                                                                                                                                                                                                                                                                                                                                                                                                                                                                                                                                                                                                                                                                                                                                                                                                                                                                                                                                                                                                                                                                                                                                                                                                                                                                                                                                                                                                                                                                                                                                                                                                                                                                                                                                                                                                                                                                 | Lighthouse Lab in Cambridge                                                                                                                                                                                         | Wellcome Sanger Institute for the COVID-19 Genomics UK (COG-UK) Consortium                                                                                                                                                                                                                                                                                               | Rob Howes, The Lighthouse Lab in Cambridge and Alex Alderton, Roberto Amato, Sonia Goncalves, Ewan Harrison, David K. Jackson, Ian Johnston, Dominic Kwiatkowski, Cordelia Langford, John Sillitoe on behalf of the Wellcome Sanger Institute COVID-19 Surveillance Team                                                                                                                                                                                  |
| EPI_ISL_709806                                                                                                                                                                                                                                                                                                                                                                                                                                                                                                                                                                                                                                                                                                                                                                                                                                                                                                                                                                                                                                                                                                                                                                                                                                                                                                                                                                                                                                                                                                                                                                                                                                                                                                                                                                                                                                                                                                                                                                                                                                                                                                                                                                                                                                                                                                                                                                                                                                                                                 | Lighthouse Lab in Glasgow                                                                                                                                                                                           | Wellcome Sanger Institute for the COVID-19 Genomics UK (COG-UK) Consortium                                                                                                                                                                                                                                                                                               | Harper VanSteenhouse, Yumi Kasai, David Gray, Carol Clugston, Anna Dominiczak and Alex Alderton, Roberto Amato, Sonia Goncalves, Ewan Harrison, David K. Jackson, Ian Johnston, Dominic Kwiatkowski, Cordelia Langford, John Sillitoe on behalf of the Wellcome Sanger Institute COVID-19 Surveillance Team                                                                                                                                               |
| EPI_ISL_709807, EPI_ISL_709808                                                                                                                                                                                                                                                                                                                                                                                                                                                                                                                                                                                                                                                                                                                                                                                                                                                                                                                                                                                                                                                                                                                                                                                                                                                                                                                                                                                                                                                                                                                                                                                                                                                                                                                                                                                                                                                                                                                                                                                                                                                                                                                                                                                                                                                                                                                                                                                                                                                                 | Lighthouse Lab in Cambridge                                                                                                                                                                                         | Wellcome Sanger Institute for the COVID-19 Genomics UK (COG-UK) Consortium                                                                                                                                                                                                                                                                                               | Rob Howes, The Lighthouse Lab in Cambridge and Alex Alderton, Roberto Amato, Sonia Goncalves, Ewan Harrison, David K. Jackson, Ian Johnston, Dominic Kwiatkowski, Cordelia Langford, John Sillitoe on behalf of the Wellcome Sanger Institute COVID-19 Surveillance Team                                                                                                                                                                                  |

[illegible]

|                                                                                                                                                                                                                                                                                                                                                                                                                                                                                                                                                                                                                                                                                                                                                                                                                                                                                                                                                                                                                                                                                                                                                                                                                                                                                                                                                                                                                                                                                                                                                                                                                                                                                                                                                                                                                                                                                                                                                                                                                                                                                                                                                                                                                                                                                                                                                                                                         |                                    |                                                                            |                                                                                                                                                                                                                                                                                                             |
|---------------------------------------------------------------------------------------------------------------------------------------------------------------------------------------------------------------------------------------------------------------------------------------------------------------------------------------------------------------------------------------------------------------------------------------------------------------------------------------------------------------------------------------------------------------------------------------------------------------------------------------------------------------------------------------------------------------------------------------------------------------------------------------------------------------------------------------------------------------------------------------------------------------------------------------------------------------------------------------------------------------------------------------------------------------------------------------------------------------------------------------------------------------------------------------------------------------------------------------------------------------------------------------------------------------------------------------------------------------------------------------------------------------------------------------------------------------------------------------------------------------------------------------------------------------------------------------------------------------------------------------------------------------------------------------------------------------------------------------------------------------------------------------------------------------------------------------------------------------------------------------------------------------------------------------------------------------------------------------------------------------------------------------------------------------------------------------------------------------------------------------------------------------------------------------------------------------------------------------------------------------------------------------------------------------------------------------------------------------------------------------------------------|------------------------------------|----------------------------------------------------------------------------|-------------------------------------------------------------------------------------------------------------------------------------------------------------------------------------------------------------------------------------------------------------------------------------------------------------|
| EPI_ISL_710576                                                                                                                                                                                                                                                                                                                                                                                                                                                                                                                                                                                                                                                                                                                                                                                                                                                                                                                                                                                                                                                                                                                                                                                                                                                                                                                                                                                                                                                                                                                                                                                                                                                                                                                                                                                                                                                                                                                                                                                                                                                                                                                                                                                                                                                                                                                                                                                          | VC Sorgenfriintagningen            | The Public Health Agency of Sweden                                         | Department of Microbiology, The Public Health Agency of Sweden                                                                                                                                                                                                                                              |
| EPI_ISL_710577, EPI_ISL_710578                                                                                                                                                                                                                                                                                                                                                                                                                                                                                                                                                                                                                                                                                                                                                                                                                                                                                                                                                                                                                                                                                                                                                                                                                                                                                                                                                                                                                                                                                                                                                                                                                                                                                                                                                                                                                                                                                                                                                                                                                                                                                                                                                                                                                                                                                                                                                                          | Vardcentralen Brinken              | The Public Health Agency of Sweden                                         | Department of Microbiology, The Public Health Agency of Sweden                                                                                                                                                                                                                                              |
| EPI_ISL_710581, EPI_ISL_710582, EPI_ISL_710583                                                                                                                                                                                                                                                                                                                                                                                                                                                                                                                                                                                                                                                                                                                                                                                                                                                                                                                                                                                                                                                                                                                                                                                                                                                                                                                                                                                                                                                                                                                                                                                                                                                                                                                                                                                                                                                                                                                                                                                                                                                                                                                                                                                                                                                                                                                                                          | The Public Health Agency of Sweden | The Public Health Agency of Sweden                                         | Department of Microbiology, The Public Health Agency of Sweden                                                                                                                                                                                                                                              |
| EPI_ISL_710585, EPI_ISL_710586                                                                                                                                                                                                                                                                                                                                                                                                                                                                                                                                                                                                                                                                                                                                                                                                                                                                                                                                                                                                                                                                                                                                                                                                                                                                                                                                                                                                                                                                                                                                                                                                                                                                                                                                                                                                                                                                                                                                                                                                                                                                                                                                                                                                                                                                                                                                                                          | Orsa VC                            | The Public Health Agency of Sweden                                         | Department of Microbiology, The Public Health Agency of Sweden                                                                                                                                                                                                                                              |
| EPI_ISL_710588                                                                                                                                                                                                                                                                                                                                                                                                                                                                                                                                                                                                                                                                                                                                                                                                                                                                                                                                                                                                                                                                                                                                                                                                                                                                                                                                                                                                                                                                                                                                                                                                                                                                                                                                                                                                                                                                                                                                                                                                                                                                                                                                                                                                                                                                                                                                                                                          | Omtanken Grimmered                 | The Public Health Agency of Sweden                                         | Department of Microbiology, The Public Health Agency of Sweden                                                                                                                                                                                                                                              |
| EPI_ISL_710589, EPI_ISL_710590                                                                                                                                                                                                                                                                                                                                                                                                                                                                                                                                                                                                                                                                                                                                                                                                                                                                                                                                                                                                                                                                                                                                                                                                                                                                                                                                                                                                                                                                                                                                                                                                                                                                                                                                                                                                                                                                                                                                                                                                                                                                                                                                                                                                                                                                                                                                                                          | Narhalsan Fjällbacka VC            | The Public Health Agency of Sweden                                         | Department of Microbiology, The Public Health Agency of Sweden                                                                                                                                                                                                                                              |
| EPI_ISL_710604                                                                                                                                                                                                                                                                                                                                                                                                                                                                                                                                                                                                                                                                                                                                                                                                                                                                                                                                                                                                                                                                                                                                                                                                                                                                                                                                                                                                                                                                                                                                                                                                                                                                                                                                                                                                                                                                                                                                                                                                                                                                                                                                                                                                                                                                                                                                                                                          | Klinisk mikrobiologi               | The Public Health Agency of Sweden                                         | Department of Microbiology, The Public Health Agency of Sweden                                                                                                                                                                                                                                              |
| EPI_ISL_710607                                                                                                                                                                                                                                                                                                                                                                                                                                                                                                                                                                                                                                                                                                                                                                                                                                                                                                                                                                                                                                                                                                                                                                                                                                                                                                                                                                                                                                                                                                                                                                                                                                                                                                                                                                                                                                                                                                                                                                                                                                                                                                                                                                                                                                                                                                                                                                                          | Halsomedicinskt Center             | The Public Health Agency of Sweden                                         | Department of Microbiology, The Public Health Agency of Sweden                                                                                                                                                                                                                                              |
| EPI_ISL_710612                                                                                                                                                                                                                                                                                                                                                                                                                                                                                                                                                                                                                                                                                                                                                                                                                                                                                                                                                                                                                                                                                                                                                                                                                                                                                                                                                                                                                                                                                                                                                                                                                                                                                                                                                                                                                                                                                                                                                                                                                                                                                                                                                                                                                                                                                                                                                                                          | Capio Bro VC                       | The Public Health Agency of Sweden                                         | Department of Microbiology, The Public Health Agency of Sweden                                                                                                                                                                                                                                              |
| EPI_ISL_710699, EPI_ISL_710700, EPI_ISL_710701, EPI_ISL_710702, EPI_ISL_710703, EPI_ISL_710706, EPI_ISL_710707, EPI_ISL_710709, EPI_ISL_710711, EPI_ISL_710715, EPI_ISL_710716, EPI_ISL_710717, EPI_ISL_710718, EPI_ISL_710719, EPI_ISL_710720, EPI_ISL_710721, EPI_ISL_710722, EPI_ISL_710723, EPI_ISL_710724, EPI_ISL_710726, EPI_ISL_710728, EPI_ISL_710729, EPI_ISL_710732, EPI_ISL_710733, EPI_ISL_710735, EPI_ISL_710736, EPI_ISL_710737, EPI_ISL_710739, EPI_ISL_710741, EPI_ISL_710742, EPI_ISL_710744, EPI_ISL_710745                                                                                                                                                                                                                                                                                                                                                                                                                                                                                                                                                                                                                                                                                                                                                                                                                                                                                                                                                                                                                                                                                                                                                                                                                                                                                                                                                                                                                                                                                                                                                                                                                                                                                                                                                                                                                                                                          |                                    |                                                                            |                                                                                                                                                                                                                                                                                                             |
| see above                                                                                                                                                                                                                                                                                                                                                                                                                                                                                                                                                                                                                                                                                                                                                                                                                                                                                                                                                                                                                                                                                                                                                                                                                                                                                                                                                                                                                                                                                                                                                                                                                                                                                                                                                                                                                                                                                                                                                                                                                                                                                                                                                                                                                                                                                                                                                                                               | Lighthouse Lab in Alderley Park    | Wellcome Sanger Institute for the COVID-19 Genomics UK (COG-UK) Consortium | Jacquelyn Wynn, Mairead Hyland, The Lighthouse Lab in Alderley Park and Alex Alderton, Roberto Amato, Sonia Goncalves, Ewan Harrison, David K. Jackson, Ian Johnston, Dominic Kwiatkowski, Cordelia Langford, John Sillitoe on behalf of the Wellcome Sanger Institute COVID-19 Surveillance Team           |
| EPI_ISL_710748                                                                                                                                                                                                                                                                                                                                                                                                                                                                                                                                                                                                                                                                                                                                                                                                                                                                                                                                                                                                                                                                                                                                                                                                                                                                                                                                                                                                                                                                                                                                                                                                                                                                                                                                                                                                                                                                                                                                                                                                                                                                                                                                                                                                                                                                                                                                                                                          | Lighthouse Lab in Glasgow          | Wellcome Sanger Institute for the COVID-19 Genomics UK (COG-UK) Consortium | Harper VanSteenhouse, Yumi Kasai, David Gray, Carol Clugston, Anna Dominiczak and Alex Alderton, Roberto Amato, Sonia Goncalves, Ewan Harrison, David K. Jackson, Ian Johnston, Dominic Kwiatkowski, Cordelia Langford, John Sillitoe on behalf of the Wellcome Sanger Institute COVID-19 Surveillance Team |
| EPI_ISL_710749, EPI_ISL_710750, EPI_ISL_710751                                                                                                                                                                                                                                                                                                                                                                                                                                                                                                                                                                                                                                                                                                                                                                                                                                                                                                                                                                                                                                                                                                                                                                                                                                                                                                                                                                                                                                                                                                                                                                                                                                                                                                                                                                                                                                                                                                                                                                                                                                                                                                                                                                                                                                                                                                                                                          | Lighthouse Lab in Alderley Park    | Wellcome Sanger Institute for the COVID-19 Genomics UK (COG-UK) Consortium | Jacquelyn Wynn, Mairead Hyland, The Lighthouse Lab in Alderley Park and Alex Alderton, Roberto Amato, Sonia Goncalves, Ewan Harrison, David K. Jackson, Ian Johnston, Dominic Kwiatkowski, Cordelia Langford, John Sillitoe on behalf of the Wellcome Sanger Institute COVID-19 Surveillance Team           |
| EPI_ISL_710753, EPI_ISL_710754, EPI_ISL_710755, EPI_ISL_710758, EPI_ISL_710759, EPI_ISL_710760, EPI_ISL_710761, EPI_ISL_710762, EPI_ISL_710763, EPI_ISL_710764, EPI_ISL_710765, EPI_ISL_710766, EPI_ISL_710768, EPI_ISL_710771, EPI_ISL_710772, EPI_ISL_710774, EPI_ISL_710775, EPI_ISL_710776, EPI_ISL_710777, EPI_ISL_710779, EPI_ISL_710780, EPI_ISL_710781, EPI_ISL_710783, EPI_ISL_710786, EPI_ISL_710787, EPI_ISL_710789, EPI_ISL_710790, EPI_ISL_710793, EPI_ISL_710794, EPI_ISL_710795, EPI_ISL_710797, EPI_ISL_710799, EPI_ISL_710801, EPI_ISL_710802, EPI_ISL_710803, EPI_ISL_710804, EPI_ISL_710805, EPI_ISL_710807, EPI_ISL_710808, EPI_ISL_710809, EPI_ISL_710810, EPI_ISL_710811, EPI_ISL_710812, EPI_ISL_710813, EPI_ISL_710814, EPI_ISL_710815, EPI_ISL_710817, EPI_ISL_710818, EPI_ISL_710819, EPI_ISL_710820                                                                                                                                                                                                                                                                                                                                                                                                                                                                                                                                                                                                                                                                                                                                                                                                                                                                                                                                                                                                                                                                                                                                                                                                                                                                                                                                                                                                                                                                                                                                                                          |                                    |                                                                            |                                                                                                                                                                                                                                                                                                             |
| see above                                                                                                                                                                                                                                                                                                                                                                                                                                                                                                                                                                                                                                                                                                                                                                                                                                                                                                                                                                                                                                                                                                                                                                                                                                                                                                                                                                                                                                                                                                                                                                                                                                                                                                                                                                                                                                                                                                                                                                                                                                                                                                                                                                                                                                                                                                                                                                                               | Lighthouse Lab in Glasgow          | Wellcome Sanger Institute for the COVID-19 Genomics UK (COG-UK) Consortium | Harper VanSteenhouse, Yumi Kasai, David Gray, Carol Clugston, Anna Dominiczak and Alex Alderton, Roberto Amato, Sonia Goncalves, Ewan Harrison, David K. Jackson, Ian Johnston, Dominic Kwiatkowski, Cordelia Langford, John Sillitoe on behalf of the Wellcome Sanger Institute COVID-19 Surveillance Team |
| EPI_ISL_710823, EPI_ISL_710825, EPI_ISL_710828, EPI_ISL_710829                                                                                                                                                                                                                                                                                                                                                                                                                                                                                                                                                                                                                                                                                                                                                                                                                                                                                                                                                                                                                                                                                                                                                                                                                                                                                                                                                                                                                                                                                                                                                                                                                                                                                                                                                                                                                                                                                                                                                                                                                                                                                                                                                                                                                                                                                                                                          | Lighthouse Lab in Cambridge        | Wellcome Sanger Institute for the COVID-19 Genomics UK (COG-UK) Consortium | Rob Howes, The Lighthouse Lab in Cambridge and Alex Alderton, Roberto Amato, Sonia Goncalves, Ewan Harrison, David K. Jackson, Ian Johnston, Dominic Kwiatkowski, Cordelia Langford, John Sillitoe on behalf of the Wellcome Sanger Institute COVID-19 Surveillance Team                                    |
| EPI_ISL_711229, EPI_ISL_711230, EPI_ISL_711231, EPI_ISL_711232, EPI_ISL_711233, EPI_ISL_711234, EPI_ISL_711235, EPI_ISL_711236, EPI_ISL_711237, EPI_ISL_711238, EPI_ISL_711239, EPI_ISL_711240, EPI_ISL_711241, EPI_ISL_711242, EPI_ISL_711243, EPI_ISL_711244, EPI_ISL_711245, EPI_ISL_711246, EPI_ISL_711247, EPI_ISL_711248, EPI_ISL_711249, EPI_ISL_711250, EPI_ISL_711251, EPI_ISL_711252, EPI_ISL_711253, EPI_ISL_711254, EPI_ISL_711255, EPI_ISL_711256, EPI_ISL_711257, EPI_ISL_711258, EPI_ISL_711259, EPI_ISL_711260, EPI_ISL_711261, EPI_ISL_711262, EPI_ISL_711263, EPI_ISL_711264, EPI_ISL_711265, EPI_ISL_711266, EPI_ISL_711268, EPI_ISL_711269, EPI_ISL_711270, EPI_ISL_711271, EPI_ISL_711272, EPI_ISL_711286, EPI_ISL_711287, EPI_ISL_711288, EPI_ISL_711289, EPI_ISL_711290, EPI_ISL_711291, EPI_ISL_711292, EPI_ISL_711293, EPI_ISL_711295, EPI_ISL_711297, EPI_ISL_711298, EPI_ISL_711301, EPI_ISL_711302, EPI_ISL_711304, EPI_ISL_711305, EPI_ISL_711306, EPI_ISL_711307, EPI_ISL_711308, EPI_ISL_711309, EPI_ISL_711310, EPI_ISL_711311, EPI_ISL_711312, EPI_ISL_711313, EPI_ISL_711314, EPI_ISL_711315, EPI_ISL_711316, EPI_ISL_711317, EPI_ISL_711319, EPI_ISL_711321, EPI_ISL_711322, EPI_ISL_711323, EPI_ISL_711324, EPI_ISL_711325, EPI_ISL_711326, EPI_ISL_711327, EPI_ISL_711328, EPI_ISL_711329, EPI_ISL_711330, EPI_ISL_711331, EPI_ISL_711332, EPI_ISL_711333, EPI_ISL_711334, EPI_ISL_711335, EPI_ISL_711336, EPI_ISL_711337, EPI_ISL_711339, EPI_ISL_711341, EPI_ISL_711342, EPI_ISL_711343, EPI_ISL_711344, EPI_ISL_711345, EPI_ISL_711346, EPI_ISL_711347, EPI_ISL_711348, EPI_ISL_711349, EPI_ISL_711350, EPI_ISL_711351, EPI_ISL_711352, EPI_ISL_711353, EPI_ISL_711354, EPI_ISL_711355, EPI_ISL_711356, EPI_ISL_711357, EPI_ISL_711358, EPI_ISL_711359, EPI_ISL_711360, EPI_ISL_711361, EPI_ISL_711362, EPI_ISL_711363, EPI_ISL_711365, EPI_ISL_711366, EPI_ISL_711367, EPI_ISL_711368, EPI_ISL_711369, EPI_ISL_711370, EPI_ISL_711372, EPI_ISL_711373, EPI_ISL_711374, EPI_ISL_711375, EPI_ISL_711376, EPI_ISL_711377, EPI_ISL_711378, EPI_ISL_711379, EPI_ISL_711380, EPI_ISL_711381, EPI_ISL_711382, EPI_ISL_711383, EPI_ISL_711388, EPI_ISL_711389, EPI_ISL_711390, EPI_ISL_711391, EPI_ISL_711394, EPI_ISL_711445, EPI_ISL_711446, EPI_ISL_711448, EPI_ISL_711449, EPI_ISL_711450, EPI_ISL_711451, EPI_ISL_711452, EPI_ISL_711453, EPI_ISL_711454, EPI_ISL |                                    |                                                                            |                                                                                                                                                                                                                                                                                                             |

[illegible]

|                                                                                                                                                                                                                                                                                                                                                                                                                                                                                                                                                                                                                                                                                                                                                                                                                                                                                                                                                                                                                                                                                                                                                                                                                                                                                                                                                                                                                                                                                                                                                                                                                                                                                                                                                                                                                                                                                                                                                                                                                                                                                                                                                                                                                                                                                                                                                                                                                                                                                                                                                                                                                                                                                                                                                                                                                                |                                                                                                             |                                                                                       |                                                                                                                                                                                                                                                                                                             |
|--------------------------------------------------------------------------------------------------------------------------------------------------------------------------------------------------------------------------------------------------------------------------------------------------------------------------------------------------------------------------------------------------------------------------------------------------------------------------------------------------------------------------------------------------------------------------------------------------------------------------------------------------------------------------------------------------------------------------------------------------------------------------------------------------------------------------------------------------------------------------------------------------------------------------------------------------------------------------------------------------------------------------------------------------------------------------------------------------------------------------------------------------------------------------------------------------------------------------------------------------------------------------------------------------------------------------------------------------------------------------------------------------------------------------------------------------------------------------------------------------------------------------------------------------------------------------------------------------------------------------------------------------------------------------------------------------------------------------------------------------------------------------------------------------------------------------------------------------------------------------------------------------------------------------------------------------------------------------------------------------------------------------------------------------------------------------------------------------------------------------------------------------------------------------------------------------------------------------------------------------------------------------------------------------------------------------------------------------------------------------------------------------------------------------------------------------------------------------------------------------------------------------------------------------------------------------------------------------------------------------------------------------------------------------------------------------------------------------------------------------------------------------------------------------------------------------------|-------------------------------------------------------------------------------------------------------------|---------------------------------------------------------------------------------------|-------------------------------------------------------------------------------------------------------------------------------------------------------------------------------------------------------------------------------------------------------------------------------------------------------------|
| see above                                                                                                                                                                                                                                                                                                                                                                                                                                                                                                                                                                                                                                                                                                                                                                                                                                                                                                                                                                                                                                                                                                                                                                                                                                                                                                                                                                                                                                                                                                                                                                                                                                                                                                                                                                                                                                                                                                                                                                                                                                                                                                                                                                                                                                                                                                                                                                                                                                                                                                                                                                                                                                                                                                                                                                                                                      | Department of Virus and Microbiological Special Diagnostics,<br>Statens Serum Institut, Copenhagen, Denmark | Albertsen Lab, Department of Chemistry and Bioscience,<br>Aalborg University, Denmark | Danish Covid-19 Genome Consortium                                                                                                                                                                                                                                                                           |
| EPI_ISL_717620, EPI_ISL_717621                                                                                                                                                                                                                                                                                                                                                                                                                                                                                                                                                                                                                                                                                                                                                                                                                                                                                                                                                                                                                                                                                                                                                                                                                                                                                                                                                                                                                                                                                                                                                                                                                                                                                                                                                                                                                                                                                                                                                                                                                                                                                                                                                                                                                                                                                                                                                                                                                                                                                                                                                                                                                                                                                                                                                                                                 | Lab voor klinische biologie                                                                                 | Onderzoeksgroep Virologie                                                             | Nick Vereecke, Laurens Lambrechts, Marthe Pauwels, Bruno Verhasselt, Linos Vandekerckhove, Hans Nauwynck, Sebastiaan Theuns                                                                                                                                                                                 |
| EPI_ISL_717734, EPI_ISL_717741, EPI_ISL_717752                                                                                                                                                                                                                                                                                                                                                                                                                                                                                                                                                                                                                                                                                                                                                                                                                                                                                                                                                                                                                                                                                                                                                                                                                                                                                                                                                                                                                                                                                                                                                                                                                                                                                                                                                                                                                                                                                                                                                                                                                                                                                                                                                                                                                                                                                                                                                                                                                                                                                                                                                                                                                                                                                                                                                                                 | Kingston Health Sciences Centre and Queen's University                                                      | Ontario Institute for Cancer Research                                                 | Prameet M. Sheth, Calvin Sjaarda, Robert Colautti, Katya Douchant, Ilina Lungu, Bernard Lam, Paul Krzyzanowski, Michael Laszloffy, Lawrence E. Heister, Richard de Borja, Jared T. Simpson                                                                                                                  |
| EPI_ISL_718009, EPI_ISL_718011, EPI_ISL_718012, EPI_ISL_718015                                                                                                                                                                                                                                                                                                                                                                                                                                                                                                                                                                                                                                                                                                                                                                                                                                                                                                                                                                                                                                                                                                                                                                                                                                                                                                                                                                                                                                                                                                                                                                                                                                                                                                                                                                                                                                                                                                                                                                                                                                                                                                                                                                                                                                                                                                                                                                                                                                                                                                                                                                                                                                                                                                                                                                 | Lab voor klinische biologie                                                                                 | Onderzoeksgroep Virologie                                                             | Laurens Lambrechts, Nick Vereecke, Marthe Pauwels, Bruno Verhasselt, Linos Vandekerckhove, Hans Nauwynck, Sebastiaan Theuns                                                                                                                                                                                 |
| EPI_ISL_718016, EPI_ISL_718017, EPI_ISL_718018, EPI_ISL_718020, EPI_ISL_718021                                                                                                                                                                                                                                                                                                                                                                                                                                                                                                                                                                                                                                                                                                                                                                                                                                                                                                                                                                                                                                                                                                                                                                                                                                                                                                                                                                                                                                                                                                                                                                                                                                                                                                                                                                                                                                                                                                                                                                                                                                                                                                                                                                                                                                                                                                                                                                                                                                                                                                                                                                                                                                                                                                                                                 | Lab voor klinische biologie                                                                                 | Onderzoeksgroep Virologie                                                             | Nick Vereecke, Laurens Lambrechts, Marthe Pauwels, Bruno Verhasselt, Linos Vandekerckhove, Hans Nauwynck, Sebastiaan Theuns                                                                                                                                                                                 |
| EPI_ISL_718023                                                                                                                                                                                                                                                                                                                                                                                                                                                                                                                                                                                                                                                                                                                                                                                                                                                                                                                                                                                                                                                                                                                                                                                                                                                                                                                                                                                                                                                                                                                                                                                                                                                                                                                                                                                                                                                                                                                                                                                                                                                                                                                                                                                                                                                                                                                                                                                                                                                                                                                                                                                                                                                                                                                                                                                                                 | Lab voor klinische biologie                                                                                 | Onderzoeksgroep Virologie                                                             | Laurens Lambrechts, Nick Vereecke, Marthe Pauwels, Bruno Verhasselt, Linos Vandekerckhove, Hans Nauwynck, Sebastiaan Theuns                                                                                                                                                                                 |
| EPI_ISL_718025                                                                                                                                                                                                                                                                                                                                                                                                                                                                                                                                                                                                                                                                                                                                                                                                                                                                                                                                                                                                                                                                                                                                                                                                                                                                                                                                                                                                                                                                                                                                                                                                                                                                                                                                                                                                                                                                                                                                                                                                                                                                                                                                                                                                                                                                                                                                                                                                                                                                                                                                                                                                                                                                                                                                                                                                                 | Lab voor klinische biologie                                                                                 | Onderzoeksgroep Virologie                                                             | Nick Vereecke, Laurens Lambrechts, Marthe Pauwels, Bruno Verhasselt, Linos Vandekerckhove, Hans Nauwynck, Sebastiaan Theuns                                                                                                                                                                                 |
| EPI_ISL_718172, EPI_ISL_718200, EPI_ISL_718202                                                                                                                                                                                                                                                                                                                                                                                                                                                                                                                                                                                                                                                                                                                                                                                                                                                                                                                                                                                                                                                                                                                                                                                                                                                                                                                                                                                                                                                                                                                                                                                                                                                                                                                                                                                                                                                                                                                                                                                                                                                                                                                                                                                                                                                                                                                                                                                                                                                                                                                                                                                                                                                                                                                                                                                 | Ministry of Health Hospitals                                                                                | Institute of Health and Community Medicine                                            | David Perera, Ooi Mong How, Chua Hook Hin, Tonnii Sia Loong Loong, Wong Jyn Shan, Wong King Aik, Chan Chia Jui                                                                                                                                                                                              |
| EPI_ISL_719605, EPI_ISL_719606, EPI_ISL_719608, EPI_ISL_719609, EPI_ISL_719611, EPI_ISL_719612, EPI_ISL_719613, EPI_ISL_719619, EPI_ISL_719621, EPI_ISL_719622, EPI_ISL_719623, EPI_ISL_719625, EPI_ISL_719629, EPI_ISL_719631, EPI_ISL_719635, EPI_ISL_719636, EPI_ISL_719640, EPI_ISL_719641, EPI_ISL_719643, EPI_ISL_719644, EPI_ISL_719646, EPI_ISL_719648, EPI_ISL_719651, EPI_ISL_719652, EPI_ISL_719655, EPI_ISL_719656, EPI_ISL_719657, EPI_ISL_719663, EPI_ISL_719664, EPI_ISL_719668, EPI_ISL_719670, EPI_ISL_719671, EPI_ISL_719673, EPI_ISL_719680, EPI_ISL_719681, EPI_ISL_719683, EPI_ISL_719685, EPI_ISL_719686, EPI_ISL_719688, EPI_ISL_719691, EPI_ISL_719692, EPI_ISL_719693, EPI_ISL_719694, EPI_ISL_719698, EPI_ISL_719700, EPI_ISL_719701, EPI_ISL_719712, EPI_ISL_719713, EPI_ISL_719716, EPI_ISL_719717, EPI_ISL_719720, EPI_ISL_719723, EPI_ISL_719724, EPI_ISL_719725, EPI_ISL_719728, EPI_ISL_719729, EPI_ISL_719731, EPI_ISL_719733, EPI_ISL_719735, EPI_ISL_719736, EPI_ISL_719738, EPI_ISL_719739, EPI_ISL_719740, EPI_ISL_719742, EPI_ISL_719744, EPI_ISL_719748, EPI_ISL_719749, EPI_ISL_719750, EPI_ISL_719755, EPI_ISL_719758, EPI_ISL_719760, EPI_ISL_719761, EPI_ISL_719764, EPI_ISL_719766, EPI_ISL_719768, EPI_ISL_719770, EPI_ISL_719771, EPI_ISL_719772, EPI_ISL_719773, EPI_ISL_719774, EPI_ISL_719775, EPI_ISL_719780, EPI_ISL_719786, EPI_ISL_719787, EPI_ISL_719788, EPI_ISL_719789, EPI_ISL_719790, EPI_ISL_719791, EPI_ISL_719792, EPI_ISL_719793, EPI_ISL_719796, EPI_ISL_719798, EPI_ISL_719800, EPI_ISL_719802, EPI_ISL_719803, EPI_ISL_719804, EPI_ISL_719805, EPI_ISL_719807, EPI_ISL_719809, EPI_ISL_719810, EPI_ISL_719811, EPI_ISL_719812, EPI_ISL_719815, EPI_ISL_719817, EPI_ISL_719819, EPI_ISL_719821, EPI_ISL_719823, EPI_ISL_719829, EPI_ISL_719834, EPI_ISL_719839, EPI_ISL_719841, EPI_ISL_719846, EPI_ISL_719848, EPI_ISL_719856, EPI_ISL_719857, EPI_ISL_719861, EPI_ISL_719862, EPI_ISL_719864, EPI_ISL_719865, EPI_ISL_719866, EPI_ISL_719867, EPI_ISL_719868, EPI_ISL_719871, EPI_ISL_719872, EPI_ISL_719873, EPI_ISL_719875, EPI_ISL_719876, EPI_ISL_719877, EPI_ISL_719880, EPI_ISL_719883, EPI_ISL_719884, EPI_ISL_719885, EPI_ISL_719889, EPI_ISL_719891, EPI_ISL_719892, EPI_ISL_719898, EPI_ISL_719900, EPI_ISL_719901, EPI_ISL_719902, EPI_ISL_719907, EPI_ISL_719908, EPI_ISL_719909, EPI_ISL_719910, EPI_ISL_719911, EPI_ISL_719912, EPI_ISL_719916, EPI_ISL_719918, EPI_ISL_719921, EPI_ISL_719922, EPI_ISL_719923, EPI_ISL_719925, EPI_ISL_719929, EPI_ISL_719930, EPI_ISL_719938, EPI_ISL_719940, EPI_ISL_719944, EPI_ISL_719951, EPI_ISL_719953, EPI_ISL_719958, EPI_ISL_719959, EPI_ISL_719961, EPI_ISL_719965, EPI_ISL_719972, EPI_ISL_719974, EPI_ISL_719978, EPI_ISL_719980, EPI_ISL_719983, EPI_ISL_719984, EPI_ISL_719985, EPI_ISL_719986 |                                                                                                             |                                                                                       |                                                                                                                                                                                                                                                                                                             |
| see above                                                                                                                                                                                                                                                                                                                                                                                                                                                                                                                                                                                                                                                                                                                                                                                                                                                                                                                                                                                                                                                                                                                                                                                                                                                                                                                                                                                                                                                                                                                                                                                                                                                                                                                                                                                                                                                                                                                                                                                                                                                                                                                                                                                                                                                                                                                                                                                                                                                                                                                                                                                                                                                                                                                                                                                                                      | Lighthouse Lab in Glasgow                                                                                   | Wellcome Sanger Institute for the COVID-19 Genomics UK (COG-UK) Consortium            | Harper VanSteenhouse, Yumi Kasai, David Gray, Carol Clugston, Anna Dominiczak and Alex Alderton, Roberto Amato, Sonia Goncalves, Ewan Harrison, David K. Jackson, Ian Johnston, Dominic Kwiatkowski, Cordelia Langford, John Sillitoe on behalf of the Wellcome Sanger Institute COVID-19 Surveillance Team |
| EPI_ISL_719992, EPI_ISL_719994, EPI_ISL_719995, EPI_ISL_719996, EPI_ISL_719998, EPI_ISL_720002, EPI_ISL_720004, EPI_ISL_720006, EPI_ISL_720008, EPI_ISL_720009, EPI_ISL_720010, EPI_ISL_720013, EPI_ISL_720017, EPI_ISL_720019, EPI_ISL_720020, EPI_ISL_720021, EPI_ISL_720024, EPI_ISL_720026, EPI_ISL_720030, EPI_ISL_720033, EPI_ISL_720036, EPI_ISL_720039, EPI_ISL_720042, EPI_ISL_720043, EPI_ISL_720044, EPI_ISL_720045, EPI_ISL_720046, EPI_ISL_720047, EPI_ISL_720048, EPI_ISL_720049, EPI_ISL_720050, EPI_ISL_720051, EPI_ISL_720052, EPI_ISL_720053, EPI_ISL_720054, EPI_ISL_720055, EPI_ISL_720056, EPI_ISL_720057, EPI_ISL_720058, EPI_ISL_720059, EPI_ISL_720060, EPI_ISL_720061, EPI_ISL_720062, EPI_ISL_720063, EPI_ISL_720064, EPI_ISL_720065, EPI_ISL_720066, EPI_ISL_720067, EPI_ISL_720068, EPI_ISL_720069, EPI_ISL_720070, EPI_ISL_720071, EPI_ISL_720072, EPI_ISL_720073, EPI_ISL_720074, EPI_ISL_720075, EPI_ISL_720076, EPI_ISL_720077, EPI_ISL_720078, EPI_ISL_720079, EPI_ISL_720080, EPI_ISL_720081, EPI_ISL_720082, EPI_ISL_720083, EPI_ISL_720084, EPI_ISL_720085, EPI_ISL_720086, EPI_ISL_720087, EPI_ISL_720088, EPI_ISL_720089, EPI_ISL_720090, EPI_ISL_720091, EPI_ISL_720092, EPI_ISL_720093, EPI_ISL_720094, EPI_ISL_720095, EPI_ISL_720096, EPI_ISL_720097, EPI_ISL_720098, EPI_ISL_720099, EPI_ISL_720100, EPI_ISL_720101, EPI_ISL_720102, EPI_ISL_720103, EPI_ISL_720104, EPI_ISL_720105, EPI_ISL_720106, EPI_ISL_720107, EPI_ISL_7201                                                                                                                                                                                                                                                                                                                                                                                                                                                                                                                                                                                                                                                                                                                                                                                                                                                                                                                                                                                                                                                                                                                                                                                                                                                                                                                                                   |                                                                                                             |                                                                                       |                                                                                                                                                                                                                                                                                                             |

|                                                                                                                                                                                                                                                                                                                                                                                                                                                                                                                                                                                                                                                                                                                                                                                                                                                                                                                                                                                                                                                                                                                                                                                                                                                                                                                                                                                                                                                                                                                                                                                                                                                                                                                                                                                                                                                                                                                                                                                                                                                                                                                                                                                                                                                                                                                                                                                                                                                                                                                                                                                                                                                                                                                                                                                                                                                                                                                                                                                                                                                                                                                                                                                                                                                                                                                                |                                                                                                                                                                                                                     |                                                                                                                                                                                                                                                                          |                                                                                                                                                                                                                                                                                                                                                                                                                                                                                                                                                                                                                                                                                         |
|--------------------------------------------------------------------------------------------------------------------------------------------------------------------------------------------------------------------------------------------------------------------------------------------------------------------------------------------------------------------------------------------------------------------------------------------------------------------------------------------------------------------------------------------------------------------------------------------------------------------------------------------------------------------------------------------------------------------------------------------------------------------------------------------------------------------------------------------------------------------------------------------------------------------------------------------------------------------------------------------------------------------------------------------------------------------------------------------------------------------------------------------------------------------------------------------------------------------------------------------------------------------------------------------------------------------------------------------------------------------------------------------------------------------------------------------------------------------------------------------------------------------------------------------------------------------------------------------------------------------------------------------------------------------------------------------------------------------------------------------------------------------------------------------------------------------------------------------------------------------------------------------------------------------------------------------------------------------------------------------------------------------------------------------------------------------------------------------------------------------------------------------------------------------------------------------------------------------------------------------------------------------------------------------------------------------------------------------------------------------------------------------------------------------------------------------------------------------------------------------------------------------------------------------------------------------------------------------------------------------------------------------------------------------------------------------------------------------------------------------------------------------------------------------------------------------------------------------------------------------------------------------------------------------------------------------------------------------------------------------------------------------------------------------------------------------------------------------------------------------------------------------------------------------------------------------------------------------------------------------------------------------------------------------------------------------------------|---------------------------------------------------------------------------------------------------------------------------------------------------------------------------------------------------------------------|--------------------------------------------------------------------------------------------------------------------------------------------------------------------------------------------------------------------------------------------------------------------------|-----------------------------------------------------------------------------------------------------------------------------------------------------------------------------------------------------------------------------------------------------------------------------------------------------------------------------------------------------------------------------------------------------------------------------------------------------------------------------------------------------------------------------------------------------------------------------------------------------------------------------------------------------------------------------------------|
| EPI_ISL_721526, EPI_ISL_721529, EPI_ISL_721531, EPI_ISL_721532                                                                                                                                                                                                                                                                                                                                                                                                                                                                                                                                                                                                                                                                                                                                                                                                                                                                                                                                                                                                                                                                                                                                                                                                                                                                                                                                                                                                                                                                                                                                                                                                                                                                                                                                                                                                                                                                                                                                                                                                                                                                                                                                                                                                                                                                                                                                                                                                                                                                                                                                                                                                                                                                                                                                                                                                                                                                                                                                                                                                                                                                                                                                                                                                                                                                 | Lighthouse Lab in Milton Keynes                                                                                                                                                                                     | Wellcome Sanger Institute for the COVID-19 Genomics UK (COG-UK) Consortium                                                                                                                                                                                               | The Lighthouse Lab in Milton Keynes and Alex Alderton, Roberto Amato, Sonia Goncalves, Ewan Harrison, David K. Jackson, Ian Johnston, Dominic Kwiatkowski, Cordelia Langford, John Sillitoe on behalf of the Wellcome Sanger Institute COVID-19 Surveillance Team                                                                                                                                                                                                                                                                                                                                                                                                                       |
| EPI_ISL_721533                                                                                                                                                                                                                                                                                                                                                                                                                                                                                                                                                                                                                                                                                                                                                                                                                                                                                                                                                                                                                                                                                                                                                                                                                                                                                                                                                                                                                                                                                                                                                                                                                                                                                                                                                                                                                                                                                                                                                                                                                                                                                                                                                                                                                                                                                                                                                                                                                                                                                                                                                                                                                                                                                                                                                                                                                                                                                                                                                                                                                                                                                                                                                                                                                                                                                                                 | Lighthouse Lab in Glasgow                                                                                                                                                                                           | Wellcome Sanger Institute for the COVID-19 Genomics UK (COG-UK) Consortium                                                                                                                                                                                               | Harper VanSteenhouse, Yumi Kasai, David Gray, Carol Clugston, Anna Dominiczak and Alex Alderton, Roberto Amato, Sonia Goncalves, Ewan Harrison, David K. Jackson, Ian Johnston, Dominic Kwiatkowski, Cordelia Langford, John Sillitoe on behalf of the Wellcome Sanger Institute COVID-19 Surveillance Team                                                                                                                                                                                                                                                                                                                                                                             |
| EPI_ISL_721694, EPI_ISL_721771, EPI_ISL_721794, EPI_ISL_721839, EPI_ISL_721869, EPI_ISL_721878, EPI_ISL_721891, EPI_ISL_721910, EPI_ISL_721943, EPI_ISL_721953                                                                                                                                                                                                                                                                                                                                                                                                                                                                                                                                                                                                                                                                                                                                                                                                                                                                                                                                                                                                                                                                                                                                                                                                                                                                                                                                                                                                                                                                                                                                                                                                                                                                                                                                                                                                                                                                                                                                                                                                                                                                                                                                                                                                                                                                                                                                                                                                                                                                                                                                                                                                                                                                                                                                                                                                                                                                                                                                                                                                                                                                                                                                                                 | Viollier AG                                                                                                                                                                                                         | Department of Biosystems Science and Engineering, ETH Zürich                                                                                                                                                                                                             | Christian Beisel                                                                                                                                                                                                                                                                                                                                                                                                                                                                                                                                                                                                                                                                        |
| EPI_ISL_722201                                                                                                                                                                                                                                                                                                                                                                                                                                                                                                                                                                                                                                                                                                                                                                                                                                                                                                                                                                                                                                                                                                                                                                                                                                                                                                                                                                                                                                                                                                                                                                                                                                                                                                                                                                                                                                                                                                                                                                                                                                                                                                                                                                                                                                                                                                                                                                                                                                                                                                                                                                                                                                                                                                                                                                                                                                                                                                                                                                                                                                                                                                                                                                                                                                                                                                                 | Vitalis Mostar                                                                                                                                                                                                      | Alea Genetic Center                                                                                                                                                                                                                                                      | Salihendic L., Pecar D., Konjodzic R.                                                                                                                                                                                                                                                                                                                                                                                                                                                                                                                                                                                                                                                   |
| EPI_ISL_722209                                                                                                                                                                                                                                                                                                                                                                                                                                                                                                                                                                                                                                                                                                                                                                                                                                                                                                                                                                                                                                                                                                                                                                                                                                                                                                                                                                                                                                                                                                                                                                                                                                                                                                                                                                                                                                                                                                                                                                                                                                                                                                                                                                                                                                                                                                                                                                                                                                                                                                                                                                                                                                                                                                                                                                                                                                                                                                                                                                                                                                                                                                                                                                                                                                                                                                                 | Dom Zdravlja Sarajevo                                                                                                                                                                                               | Alea Genetic Center                                                                                                                                                                                                                                                      | Salihendic L., Pecar D., Konjodzic R.                                                                                                                                                                                                                                                                                                                                                                                                                                                                                                                                                                                                                                                   |
| EPI_ISL_722419, EPI_ISL_722648, EPI_ISL_722649, EPI_ISL_722650, EPI_ISL_722651, EPI_ISL_722652, EPI_ISL_722653, EPI_ISL_722654, EPI_ISL_722655, EPI_ISL_722656, EPI_ISL_722665, EPI_ISL_722666, EPI_ISL_722667, EPI_ISL_722669, EPI_ISL_722670, EPI_ISL_722671, EPI_ISL_722672, EPI_ISL_722673, EPI_ISL_722674, EPI_ISL_722675, EPI_ISL_722676, EPI_ISL_722677, EPI_ISL_722678, EPI_ISL_722682, EPI_ISL_722683, EPI_ISL_722684, EPI_ISL_722685, EPI_ISL_722686, EPI_ISL_722688, EPI_ISL_722689, EPI_ISL_722690, EPI_ISL_722692, EPI_ISL_722693, EPI_ISL_722695, EPI_ISL_722696, EPI_ISL_722697, EPI_ISL_722711, EPI_ISL_722712                                                                                                                                                                                                                                                                                                                                                                                                                                                                                                                                                                                                                                                                                                                                                                                                                                                                                                                                                                                                                                                                                                                                                                                                                                                                                                                                                                                                                                                                                                                                                                                                                                                                                                                                                                                                                                                                                                                                                                                                                                                                                                                                                                                                                                                                                                                                                                                                                                                                                                                                                                                                                                                                                                 | Erasmus Medical Center                                                                                                                                                                                              | Bas Oude Munnink, Reina Sikkema, David Nieuwenhuijse, Irina Chestakova, Anne van der Linden, Marjan Boter, Emmanuelle Munger, Corine GeurtsvanKessel, Annemiek van der Eijk, Richard Molenkamp, Marion Koopmans, on behalf of the Dutch national COVID-19 response team. |                                                                                                                                                                                                                                                                                                                                                                                                                                                                                                                                                                                                                                                                                         |
| see above                                                                                                                                                                                                                                                                                                                                                                                                                                                                                                                                                                                                                                                                                                                                                                                                                                                                                                                                                                                                                                                                                                                                                                                                                                                                                                                                                                                                                                                                                                                                                                                                                                                                                                                                                                                                                                                                                                                                                                                                                                                                                                                                                                                                                                                                                                                                                                                                                                                                                                                                                                                                                                                                                                                                                                                                                                                                                                                                                                                                                                                                                                                                                                                                                                                                                                                      | Dutch COVID-19 response team                                                                                                                                                                                        | Erasmus Medical Center                                                                                                                                                                                                                                                   | Parisi A., Bianco A., Capozzi L., Del Sambro L., Manzulli V, Rondinone V., Pace L., Cipolletta D., Galante D.                                                                                                                                                                                                                                                                                                                                                                                                                                                                                                                                                                           |
| EPI_ISL_722910                                                                                                                                                                                                                                                                                                                                                                                                                                                                                                                                                                                                                                                                                                                                                                                                                                                                                                                                                                                                                                                                                                                                                                                                                                                                                                                                                                                                                                                                                                                                                                                                                                                                                                                                                                                                                                                                                                                                                                                                                                                                                                                                                                                                                                                                                                                                                                                                                                                                                                                                                                                                                                                                                                                                                                                                                                                                                                                                                                                                                                                                                                                                                                                                                                                                                                                 | Istituto Zooprofilattico Sperimentale della Puglia e della Basilicata                                                                                                                                               | Istituto Zooprofilattico Sperimentale della Puglia e della Basilicata                                                                                                                                                                                                    |                                                                                                                                                                                                                                                                                                                                                                                                                                                                                                                                                                                                                                                                                         |
| EPI_ISL_722936, EPI_ISL_722938, EPI_ISL_722939, EPI_ISL_722940, EPI_ISL_722942, EPI_ISL_722943, EPI_ISL_722946, EPI_ISL_722949, EPI_ISL_722950, EPI_ISL_722952, EPI_ISL_722954, EPI_ISL_722955, EPI_ISL_722956                                                                                                                                                                                                                                                                                                                                                                                                                                                                                                                                                                                                                                                                                                                                                                                                                                                                                                                                                                                                                                                                                                                                                                                                                                                                                                                                                                                                                                                                                                                                                                                                                                                                                                                                                                                                                                                                                                                                                                                                                                                                                                                                                                                                                                                                                                                                                                                                                                                                                                                                                                                                                                                                                                                                                                                                                                                                                                                                                                                                                                                                                                                 | Department of Clinical Microbiology                                                                                                                                                                                 | GIGA Medical Genomics                                                                                                                                                                                                                                                    | Keith Durkin, Maria Artesi, Sébastien Bontems, Raphaël Boreux, Bouchra Boujemla, Cécile Meex, Pierrette Melin, Marie-Pierre Hayette, Vincent Bours                                                                                                                                                                                                                                                                                                                                                                                                                                                                                                                                      |
| EPI_ISL_723123, EPI_ISL_723124, EPI_ISL_723125, EPI_ISL_723126, EPI_ISL_723128, EPI_ISL_723130, EPI_ISL_723132, EPI_ISL_723133, EPI_ISL_723134, EPI_ISL_723135, EPI_ISL_723136                                                                                                                                                                                                                                                                                                                                                                                                                                                                                                                                                                                                                                                                                                                                                                                                                                                                                                                                                                                                                                                                                                                                                                                                                                                                                                                                                                                                                                                                                                                                                                                                                                                                                                                                                                                                                                                                                                                                                                                                                                                                                                                                                                                                                                                                                                                                                                                                                                                                                                                                                                                                                                                                                                                                                                                                                                                                                                                                                                                                                                                                                                                                                 | Minnesota Department of Health, Public Health Laboratory                                                                                                                                                            | Minnesota Department of Health, Public Health Laboratory                                                                                                                                                                                                                 | Alexandra Lorentz, Jacob Garfin, Matt Plumb, and Xiong Wang                                                                                                                                                                                                                                                                                                                                                                                                                                                                                                                                                                                                                             |
| see above                                                                                                                                                                                                                                                                                                                                                                                                                                                                                                                                                                                                                                                                                                                                                                                                                                                                                                                                                                                                                                                                                                                                                                                                                                                                                                                                                                                                                                                                                                                                                                                                                                                                                                                                                                                                                                                                                                                                                                                                                                                                                                                                                                                                                                                                                                                                                                                                                                                                                                                                                                                                                                                                                                                                                                                                                                                                                                                                                                                                                                                                                                                                                                                                                                                                                                                      | Minnesota Department of Health, Public Health Laboratory                                                                                                                                                            | Minnesota Department of Health, Public Health Laboratory                                                                                                                                                                                                                 | Alexandra Lorentz, Jacob Garfin, Matt Plumb, and Xiong Wang                                                                                                                                                                                                                                                                                                                                                                                                                                                                                                                                                                                                                             |
| EPI_ISL_723147, EPI_ISL_723148, EPI_ISL_723149, EPI_ISL_723150, EPI_ISL_723151, EPI_ISL_723153                                                                                                                                                                                                                                                                                                                                                                                                                                                                                                                                                                                                                                                                                                                                                                                                                                                                                                                                                                                                                                                                                                                                                                                                                                                                                                                                                                                                                                                                                                                                                                                                                                                                                                                                                                                                                                                                                                                                                                                                                                                                                                                                                                                                                                                                                                                                                                                                                                                                                                                                                                                                                                                                                                                                                                                                                                                                                                                                                                                                                                                                                                                                                                                                                                 | Vault Health                                                                                                                                                                                                        | Minnesota Department of Health, Public Health Laboratory                                                                                                                                                                                                                 |                                                                                                                                                                                                                                                                                                                                                                                                                                                                                                                                                                                                                                                                                         |
| EPI_ISL_723155, EPI_ISL_723156, EPI_ISL_723157, EPI_ISL_723160, EPI_ISL_723169, EPI_ISL_723179, EPI_ISL_723202, EPI_ISL_723203, EPI_ISL_723204, EPI_ISL_723205, EPI_ISL_723206, EPI_ISL_723207, EPI_ISL_723208, EPI_ISL_723209, EPI_ISL_723210, EPI_ISL_723211, EPI_ISL_723213, EPI_ISL_723214, EPI_ISL_723215, EPI_ISL_723216, EPI_ISL_723217, EPI_ISL_723218, EPI_ISL_723220, EPI_ISL_723221, EPI_ISL_723222, EPI_ISL_723225, EPI_ISL_723226, EPI_ISL_723227, EPI_ISL_723229, EPI_ISL_723230, EPI_ISL_723231, EPI_ISL_723242, EPI_ISL_723243, EPI_ISL_723244, EPI_ISL_723245, EPI_ISL_723246, EPI_ISL_723247, EPI_ISL_723248, EPI_ISL_723249, EPI_ISL_723250, EPI_ISL_723251, EPI_ISL_723263, EPI_ISL_723264, EPI_ISL_723265, EPI_ISL_723266, EPI_ISL_723267, EPI_ISL_723268, EPI_ISL_723269, EPI_ISL_723270, EPI_ISL_723272, EPI_ISL_723273, EPI_ISL_723274, EPI_ISL_723288, EPI_ISL_723289, EPI_ISL_723290, EPI_ISL_723291, EPI_ISL_723292, EPI_ISL_723293, EPI_ISL_723294, EPI_ISL_723295, EPI_ISL_723296, EPI_ISL_723297, EPI_ISL_723306, EPI_ISL_723307, EPI_ISL_723308, EPI_ISL_723309, EPI_ISL_723310, EPI_ISL_723311, EPI_ISL_723312, EPI_ISL_723313, EPI_ISL_723314, EPI_ISL_723315, EPI_ISL_723316, EPI_ISL_723317, EPI_ISL_723318, EPI_ISL_723319, EPI_ISL_723320, EPI_ISL_723321, EPI_ISL_723322, EPI_ISL_723323, EPI_ISL_723324, EPI_ISL_723325, EPI_ISL_723327, EPI_ISL_723328, EPI_ISL_723329, EPI_ISL_723330, EPI_ISL_723331, EPI_ISL_723332, EPI_ISL_723333, EPI_ISL_723334, EPI_ISL_723335, EPI_ISL_723336, EPI_ISL_723337, EPI_ISL_723338, EPI_ISL_723339, EPI_ISL_723341, EPI_ISL_723342, EPI_ISL_723343, EPI_ISL_723344, EPI_ISL_723345, EPI_ISL_723346, EPI_ISL_723347, EPI_ISL_723348, EPI_ISL_723349, EPI_ISL_723350, EPI_ISL_723351, EPI_ISL_723352, EPI_ISL_723353, EPI_ISL_723354, EPI_ISL_723355, EPI_ISL_723356, EPI_ISL_723357, EPI_ISL_723358, EPI_ISL_723359, EPI_ISL_723360, EPI_ISL_723361, EPI_ISL_723362, EPI_ISL_723363, EPI_ISL_723364, EPI_ISL_723365, EPI_ISL_723366, EPI_ISL_723367, EPI_ISL_723368, EPI_ISL_723369, EPI_ISL_723370, EPI_ISL_723371, EPI_ISL_723372, EPI_ISL_723373, EPI_ISL_723374, EPI_ISL_723375, EPI_ISL_723376, EPI_ISL_723377, EPI_ISL_723378, EPI_ISL_723379, EPI_ISL_723380, EPI_ISL_723381, EPI_ISL_723382, EPI_ISL_723383, EPI_ISL_723384, EPI_ISL_723385, EPI_ISL_723386, EPI_ISL_723387, EPI_ISL_723388, EPI_ISL_723389, EPI_ISL_723390, EPI_ISL_723391, EPI_ISL_723392, EPI_ISL_723393, EPI_ISL_723394, EPI_ISL_723395, EPI_ISL_723396, EPI_ISL_723397, EPI_ISL_723398, EPI_ISL_723399, EPI_ISL_723400, EPI_ISL_723401, EPI_ISL_723402, EPI_ISL_723403, EPI_ISL_723404, EPI_ISL_723405, EPI_ISL_723406, EPI_ISL_723407, EPI_ISL_723408, EPI_ISL_723409, EPI_ISL_723410, EPI_ISL_723411, EPI_ISL_723412, EPI_ISL_723413, EPI_ISL_723414, EPI_ISL_723415, EPI_ISL_723416, EPI_ISL_723417, EPI_ISL_723418, EPI_ISL_723419, EPI_ISL_723420, EPI_ISL_723421, EPI_ISL_723422, EPI_ISL_723423, EPI_ISL_723424, EPI_ISL_723428, EPI_ISL_723429, EPI_ISL_723430, EPI_ISL_723431, EPI_ISL_723432, EPI_ISL_723433, EPI_ISL_723434, EPI_ISL_723435, EPI_ISL_723436, EPI_ISL_723440, EPI_ISL_723441, EPI_ISL_723442, EPI_ISL_723443, EPI_ISL_723444, EPI_ISL_723445, EPI_ISL_723447, EPI_ISL_723449, EPI_ISL_723450, EPI_ISL_723451, EPI_ISL_723459, EPI_ISL_723466 | National Institute for Public Health and the Environment (RIVM)                                                                                                                                                     | Adam Meijer, Harry Vennema, Jeroen Cremer, Sharon van den Brink, Bas van der Veer, AnneMarie van den Brandt, Florian Zwagemaker, Dennis Schmitz, Chantal Reusken, on behalf of the national COVID-19 response team                                                       |                                                                                                                                                                                                                                                                                                                                                                                                                                                                                                                                                                                                                                                                                         |
| see above                                                                                                                                                                                                                                                                                                                                                                                                                                                                                                                                                                                                                                                                                                                                                                                                                                                                                                                                                                                                                                                                                                                                                                                                                                                                                                                                                                                                                                                                                                                                                                                                                                                                                                                                                                                                                                                                                                                                                                                                                                                                                                                                                                                                                                                                                                                                                                                                                                                                                                                                                                                                                                                                                                                                                                                                                                                                                                                                                                                                                                                                                                                                                                                                                                                                                                                      | Dutch COVID-19 response team                                                                                                                                                                                        | National Institute for Public Health and the Environment (RIVM)                                                                                                                                                                                                          | Adam Meijer, Harry Vennema, Jeroen Cremer, Sharon van den Brink, Bas van der Veer, AnneMarie van den Brandt, Florian Zwagemaker, Dennis Schmitz, Chantal Reusken, on behalf of the national COVID-19 response team                                                                                                                                                                                                                                                                                                                                                                                                                                                                      |
| EPI_ISL_723473, EPI_ISL_723477, EPI_ISL_723479, EPI_ISL_723482, EPI_ISL_723483, EPI_ISL_723486, EPI_ISL_723489, EPI_ISL_723490                                                                                                                                                                                                                                                                                                                                                                                                                                                                                                                                                                                                                                                                                                                                                                                                                                                                                                                                                                                                                                                                                                                                                                                                                                                                                                                                                                                                                                                                                                                                                                                                                                                                                                                                                                                                                                                                                                                                                                                                                                                                                                                                                                                                                                                                                                                                                                                                                                                                                                                                                                                                                                                                                                                                                                                                                                                                                                                                                                                                                                                                                                                                                                                                 | Virginia DCLS                                                                                                                                                                                                       | Virginia DCLS                                                                                                                                                                                                                                                            | Virginia DCLS                                                                                                                                                                                                                                                                                                                                                                                                                                                                                                                                                                                                                                                                           |
| EPI_ISL_723864, EPI_ISL_723876, EPI_ISL_723885, EPI_ISL_723886, EPI_ISL_723895                                                                                                                                                                                                                                                                                                                                                                                                                                                                                                                                                                                                                                                                                                                                                                                                                                                                                                                                                                                                                                                                                                                                                                                                                                                                                                                                                                                                                                                                                                                                                                                                                                                                                                                                                                                                                                                                                                                                                                                                                                                                                                                                                                                                                                                                                                                                                                                                                                                                                                                                                                                                                                                                                                                                                                                                                                                                                                                                                                                                                                                                                                                                                                                                                                                 | Department of Pathology, University of Cambridge                                                                                                                                                                    | COVID-19 Genomics UK (COG-UK) Consortium                                                                                                                                                                                                                                 | Aminu S. Jahun, Yasmin Chaudhry, Grant Hall, Iliana Georgana, Myra Hosmillo, Martin D. Curran, Malte Pinckert, Surendra Parmar, Ian Goodfellow                                                                                                                                                                                                                                                                                                                                                                                                                                                                                                                                          |
| EPI_ISL_724063, EPI_ISL_724065, EPI_ISL_724071, EPI_ISL_724087, EPI_ISL_724093, EPI_ISL_724096, EPI_ISL_724104, EPI_ISL_724107, EPI_ISL_724109, EPI_ISL_724110, EPI_ISL_724111, EPI_ISL_724112, EPI_ISL_724115, EPI_ISL_724120, EPI_ISL_724123                                                                                                                                                                                                                                                                                                                                                                                                                                                                                                                                                                                                                                                                                                                                                                                                                                                                                                                                                                                                                                                                                                                                                                                                                                                                                                                                                                                                                                                                                                                                                                                                                                                                                                                                                                                                                                                                                                                                                                                                                                                                                                                                                                                                                                                                                                                                                                                                                                                                                                                                                                                                                                                                                                                                                                                                                                                                                                                                                                                                                                                                                 | Northumbria University / South Tees Hospitals NHS Foundation Trust / North Cumbria Integrated Care NHS Foundation Trust / North Tees and Hartlepool NHS Foundation Trust / Newcastle Hospitals NHS Foundation Trust | COVID-19 Genomics UK (COG-UK) Consortium                                                                                                                                                                                                                                 | Darren L Smith,Andrew Nelson,Matthew Bashton,Greg R Young,Joshua Loh,John Allan,Mohammad A Tariq,Giles S Holt,Gary Black,Wen C Yew,Lynn Dover,Paul Baker,Steve Liggett,Sarah Essex,Jane Greenaway,Debra Padgett,Clive Graham,Garen Scott,Edward Barton,Emma Swindells,Brendan Payne,Jennifer Collins,Yusri Taha,Gary Eltringham                                                                                                                                                                                                                                                                                                                                                         |
| EPI_ISL_724223, EPI_ISL_724224, EPI_ISL_724226                                                                                                                                                                                                                                                                                                                                                                                                                                                                                                                                                                                                                                                                                                                                                                                                                                                                                                                                                                                                                                                                                                                                                                                                                                                                                                                                                                                                                                                                                                                                                                                                                                                                                                                                                                                                                                                                                                                                                                                                                                                                                                                                                                                                                                                                                                                                                                                                                                                                                                                                                                                                                                                                                                                                                                                                                                                                                                                                                                                                                                                                                                                                                                                                                                                                                 | Virology Department, Royal Infirmary of Edinburgh, NHS Lothian / School of Biological Sciences, University of Edinburgh / Institute of Genetics and Molecular Medicine, University of Edinburgh                     | COVID-19 Genomics UK (COG-UK) Consortium                                                                                                                                                                                                                                 | McHugh M, Dewar R, Rooke S, Gallagher M, Balcaza C, O'Toole Á, Scher E, Hill V, McCrone JT, Colquhoun R, Yu X, Jackson B, Rambaut A, Williams TC, Templeton K                                                                                                                                                                                                                                                                                                                                                                                                                                                                                                                           |
| EPI_ISL_724436, EPI_ISL_724442, EPI_ISL_724448, EPI_ISL_724458, EPI_ISL_724464, EPI_ISL_724468, EPI_ISL_724487, EPI_ISL_724499, EPI_ISL_724501, EPI_ISL_724503, EPI_ISL_724517, EPI_ISL_724522                                                                                                                                                                                                                                                                                                                                                                                                                                                                                                                                                                                                                                                                                                                                                                                                                                                                                                                                                                                                                                                                                                                                                                                                                                                                                                                                                                                                                                                                                                                                                                                                                                                                                                                                                                                                                                                                                                                                                                                                                                                                                                                                                                                                                                                                                                                                                                                                                                                                                                                                                                                                                                                                                                                                                                                                                                                                                                                                                                                                                                                                                                                                 | Liverpool Clinical Laboratories                                                                                                                                                                                     | COVID-19 Genomics UK (COG-UK) Consortium                                                                                                                                                                                                                                 | Sam Haldenby, Anita Lucaci, Steve Paterson, Julian Hiscox, Alistair Darby, M Almsaud, A Alrezaihi, Muhannad Alruwaili, Stuart D Armstrong, Jones Benjamin, Eleanor G Bentley, Anu Chawla, Jordan J Clark, Angela Cowell, Richard Eccles, Isabel Garcia-Dorival, Matthew Gemmell, Alessandro Gerada, PKF Gilmore, Richard Gregory, Ximeng Han, Catherine Hartley, Margaret Hughes, Miren Iturriza-Gomara, James Johnson, L Luu, Jenifer Manson, Charlotte Nelson, Elaine O'Toole, Cassie Olateju, Rebekah Penrice-Randal, Lucille Rainbow, N.P Randle, Trevor Ian Robinson, Parul Sharma, Ghada T Shawli, James P Stewart, Neil Swainston, Ecaterina Vamos, Joanne Watts, Mark Whitehead |
| EPI_ISL_724857, EPI_ISL_724859, EPI_ISL_724874, EPI_ISL_724878, EPI_ISL_724880, EPI_ISL_724882, EPI_ISL_724883, EPI_ISL_724888, EPI_ISL_724889, EPI_ISL_724891, EPI_ISL_724924, EPI_ISL_724936, EPI_ISL_724938, EPI_ISL_724941, EPI_ISL_724942, EPI_ISL_724954, EPI_ISL_724959, EPI_ISL_725008, EPI_ISL_725016                                                                                                                                                                                                                                                                                                                                                                                                                                                                                                                                                                                                                                                                                                                                                                                                                                                                                                                                                                                                                                                                                                                                                                                                                                                                                                                                                                                                                                                                                                                                                                                                                                                                                                                                                                                                                                                                                                                                                                                                                                                                                                                                                                                                                                                                                                                                                                                                                                                                                                                                                                                                                                                                                                                                                                                                                                                                                                                                                                                                                 | Northumbria University / South Tees Hospitals NHS Foundation Trust / North Cumbria Integrated Care NHS Foundation Trust / North Tees and Hartlepool NHS Foundation Trust / Newcastle Hospitals NHS Foundation Trust | COVID-19 Genomics UK (COG-UK) Consortium                                                                                                                                                                                                                                 | Darren L Smith,Andrew Nelson,Matthew Bashton,Greg R Young,Joshua Loh,John Allan,Mohammad A Tariq,Giles S Holt,Gary Black,Wen C Yew,Lynn Dover,Paul Baker,Steve Liggett,Sarah Essex,Jane Greenaway,Debra Padgett,Clive Graham,Garen Scott,Edward Barton,Emma Swindells,Brendan Payne,Jennifer Collins,Yusri Taha,Gary Eltringham                                                                                                                                                                                                                                                                                                                                                         |
| EPI_ISL_725184, EPI_ISL_725226, EPI_ISL_725248, EPI_ISL_725260                                                                                                                                                                                                                                                                                                                                                                                                                                                                                                                                                                                                                                                                                                                                                                                                                                                                                                                                                                                                                                                                                                                                                                                                                                                                                                                                                                                                                                                                                                                                                                                                                                                                                                                                                                                                                                                                                                                                                                                                                                                                                                                                                                                                                                                                                                                                                                                                                                                                                                                                                                                                                                                                                                                                                                                                                                                                                                                                                                                                                                                                                                                                                                                                                                                                 | Quadram Institute Bioscience                                                                                                                                                                                        | COVID-19 Genomics UK (COG-UK) Consortium                                                                                                                                                                                                                                 | Dave J. Baker, Gemma L. Kay, Alp Aydin, Thanh Le-Viet, Steven Rudder, Ana P. Tedim, Anastasia Kolyva, Maria Diaz, Leonardo de Oliveira Martins, Nabil-Fareed Alikhan, Lizzie Meadows, Rachael Stanley, Ngozi Elumogo, Muhammed Yasir, Nicholas M. Thomson, Alexander J Trotter, Rachel Gilroy, Samuel Bloomfield, Claire Stuart, Andrew Bell, Reenesh Prakash, Samir Dervisevic, Alison E. Mather, John Wain, Mark Webber, Andrew J. Page, Justin O'Grady                                                                                                                                                                                                                               |
| EPI_ISL_725534                                                                                                                                                                                                                                                                                                                                                                                                                                                                                                                                                                                                                                                                                                                                                                                                                                                                                                                                                                                                                                                                                                                                                                                                                                                                                                                                                                                                                                                                                                                                                                                                                                                                                                                                                                                                                                                                                                                                                                                                                                                                                                                                                                                                                                                                                                                                                                                                                                                                                                                                                                                                                                                                                                                                                                                                                                                                                                                                                                                                                                                                                                                                                                                                                                                                                                                 | Queens Medical Centre, Clinical Microbiology Department / DeepSeq Nottingham                                                                                                                                        | COVID-19 Genomics UK (COG-UK) Consortium                                                                                                                                                                                                                                 | Gemma Clark, Wendy Smith, Manjinder Khakh, Vicki M Fleming, Michelle M Lister, Hannah Howson-Wells, Jonathan Ball, Patrick McClure, Joseph Chappell, Theocharis Tsoleridis, Nadine Holmes, Matthew Carlisle, Christopher Moore, Fei Sang, Johnny Debebe, Victoria Wright, Matthew Loose                                                                                                                                                                                                                                                                                                                                                                                                 |
| EPI_ISL_725556, EPI_ISL_725558, EPI_ISL_725573, EPI_ISL_725581,                                                                                                                                                                                                                                                                                                                                                                                                                                                                                                                                                                                                                                                                                                                                                                                                                                                                                                                                                                                                                                                                                                                                                                                                                                                                                                                                                                                                                                                                                                                                                                                                                                                                                                                                                                                                                                                                                                                                                                                                                                                                                                                                                                                                                                                                                                                                                                                                                                                                                                                                                                                                                                                                                                                                                                                                                                                                                                                                                                                                                                                                                                                                                                                                                                                                | Lincolnshire Hospitals and DeepSeq Nottingham                                                                                                                                                                       | COVID-19 Genomics UK (COG-UK) Consortium                                                                                                                                                                                                                                 | Nichola Duckworth, Tim Sloan, Sarah Walsh, Jonathan Ball, Patrick McClure, Joseph Chappell, Nadine Holmes, Matthew Carlisle, Christopher Moore, Fei Sang, Johnny Debebe, Victoria Wright, Matthew Loose                                                                                                                                                                                                                                                                                                                                                                                                                                                                                 |

|                                                                                                                                                                                                                                                                                                                                                                                                                                                                                                                                                                                                                                                                                                                                                                                                                                                                                                                                                                                                                                                                                                                                                                                                                                                                                                                                                                                                                                                                                                                                                                                                                                                                                                                                                                                                                                                                                                                                                                                                                                                                                                                                                                                                                                                                                                                                                                                                                                                                                                                                                                                                                                                                                                                                                                                                                                                                                                                                                                                                                                                                                                                                                                                                                                                                                                                                                                                                                                                                                                                                                                                                                                                                                                                                                                                                                                                                                                                                                                                                                                                                                                                                                                                                                                |                                                                         |                                          |                                                                                                                                                                                                                                                                                                                                                                          |  |  |  |  |  |  |
|--------------------------------------------------------------------------------------------------------------------------------------------------------------------------------------------------------------------------------------------------------------------------------------------------------------------------------------------------------------------------------------------------------------------------------------------------------------------------------------------------------------------------------------------------------------------------------------------------------------------------------------------------------------------------------------------------------------------------------------------------------------------------------------------------------------------------------------------------------------------------------------------------------------------------------------------------------------------------------------------------------------------------------------------------------------------------------------------------------------------------------------------------------------------------------------------------------------------------------------------------------------------------------------------------------------------------------------------------------------------------------------------------------------------------------------------------------------------------------------------------------------------------------------------------------------------------------------------------------------------------------------------------------------------------------------------------------------------------------------------------------------------------------------------------------------------------------------------------------------------------------------------------------------------------------------------------------------------------------------------------------------------------------------------------------------------------------------------------------------------------------------------------------------------------------------------------------------------------------------------------------------------------------------------------------------------------------------------------------------------------------------------------------------------------------------------------------------------------------------------------------------------------------------------------------------------------------------------------------------------------------------------------------------------------------------------------------------------------------------------------------------------------------------------------------------------------------------------------------------------------------------------------------------------------------------------------------------------------------------------------------------------------------------------------------------------------------------------------------------------------------------------------------------------------------------------------------------------------------------------------------------------------------------------------------------------------------------------------------------------------------------------------------------------------------------------------------------------------------------------------------------------------------------------------------------------------------------------------------------------------------------------------------------------------------------------------------------------------------------------------------------------------------------------------------------------------------------------------------------------------------------------------------------------------------------------------------------------------------------------------------------------------------------------------------------------------------------------------------------------------------------------------------------------------------------------------------------------------------|-------------------------------------------------------------------------|------------------------------------------|--------------------------------------------------------------------------------------------------------------------------------------------------------------------------------------------------------------------------------------------------------------------------------------------------------------------------------------------------------------------------|--|--|--|--|--|--|
| EPI_ISL_725586                                                                                                                                                                                                                                                                                                                                                                                                                                                                                                                                                                                                                                                                                                                                                                                                                                                                                                                                                                                                                                                                                                                                                                                                                                                                                                                                                                                                                                                                                                                                                                                                                                                                                                                                                                                                                                                                                                                                                                                                                                                                                                                                                                                                                                                                                                                                                                                                                                                                                                                                                                                                                                                                                                                                                                                                                                                                                                                                                                                                                                                                                                                                                                                                                                                                                                                                                                                                                                                                                                                                                                                                                                                                                                                                                                                                                                                                                                                                                                                                                                                                                                                                                                                                                 |                                                                         |                                          |                                                                                                                                                                                                                                                                                                                                                                          |  |  |  |  |  |  |
| EPI_ISL_725677, EPI_ISL_725696, EPI_ISL_725700, EPI_ISL_725705, EPI_ISL_725744, EPI_ISL_725765, EPI_ISL_725767, EPI_ISL_725768, EPI_ISL_725769, EPI_ISL_725777, EPI_ISL_725778, EPI_ISL_725784, EPI_ISL_725786, EPI_ISL_725789, EPI_ISL_725796, EPI_ISL_725798, EPI_ISL_725800, EPI_ISL_725801, EPI_ISL_725805, EPI_ISL_725806, EPI_ISL_725810, EPI_ISL_725814, EPI_ISL_725816, EPI_ISL_725817, EPI_ISL_725818, EPI_ISL_725821, EPI_ISL_725822, EPI_ISL_725825, EPI_ISL_725827, EPI_ISL_725828, EPI_ISL_725830, EPI_ISL_725831, EPI_ISL_725832, EPI_ISL_725833, EPI_ISL_725834, EPI_ISL_725836, EPI_ISL_725837, EPI_ISL_725841, EPI_ISL_725846, EPI_ISL_725847, EPI_ISL_725851, EPI_ISL_725852, EPI_ISL_725864, EPI_ISL_725870, EPI_ISL_725884, EPI_ISL_725886, EPI_ISL_725887, EPI_ISL_725889, EPI_ISL_725890, EPI_ISL_725891, EPI_ISL_725898, EPI_ISL_725899, EPI_ISL_725901, EPI_ISL_725911, EPI_ISL_725915, EPI_ISL_725916, EPI_ISL_725917, EPI_ISL_725918, EPI_ISL_725919, EPI_ISL_725920, EPI_ISL_725921, EPI_ISL_725923, EPI_ISL_725924, EPI_ISL_725926, EPI_ISL_725927, EPI_ISL_725933, EPI_ISL_725936, EPI_ISL_725937, EPI_ISL_725938, EPI_ISL_725940, EPI_ISL_725941, EPI_ISL_725942, EPI_ISL_725943, EPI_ISL_725944, EPI_ISL_725949, EPI_ISL_725953, EPI_ISL_725955, EPI_ISL_725965, EPI_ISL_725969, EPI_ISL_725977, EPI_ISL_725984, EPI_ISL_725996, EPI_ISL_726000, EPI_ISL_726006, EPI_ISL_726011, EPI_ISL_726022, EPI_ISL_726023, EPI_ISL_726028, EPI_ISL_726029, EPI_ISL_726031, EPI_ISL_726066, EPI_ISL_726071, EPI_ISL_726076, EPI_ISL_726085, EPI_ISL_726086, EPI_ISL_726089, EPI_ISL_726091, EPI_ISL_726097, EPI_ISL_726098, EPI_ISL_726101, EPI_ISL_726102, EPI_ISL_726104, EPI_ISL_726105, EPI_ISL_726106, EPI_ISL_726113, EPI_ISL_726115, EPI_ISL_726118, EPI_ISL_726120, EPI_ISL_726123, EPI_ISL_726124, EPI_ISL_726126, EPI_ISL_726133, EPI_ISL_726146, EPI_ISL_726148, EPI_ISL_726149, EPI_ISL_726155, EPI_ISL_726157, EPI_ISL_726158, EPI_ISL_726159, EPI_ISL_726165, EPI_ISL_726166, EPI_ISL_726167, EPI_ISL_726171, EPI_ISL_726172, EPI_ISL_726174, EPI_ISL_726175, EPI_ISL_726177, EPI_ISL_726178, EPI_ISL_726180, EPI_ISL_726182, EPI_ISL_726183, EPI_ISL_726185, EPI_ISL_726186, EPI_ISL_726187, EPI_ISL_726188, EPI_ISL_726192, EPI_ISL_726194, EPI_ISL_726196, EPI_ISL_726198, EPI_ISL_726203, EPI_ISL_726205, EPI_ISL_726209, EPI_ISL_726214, EPI_ISL_726216, EPI_ISL_726217, EPI_ISL_726219, EPI_ISL_726220, EPI_ISL_726247, EPI_ISL_726251, EPI_ISL_726256, EPI_ISL_726263, EPI_ISL_726272, EPI_ISL_726275, EPI_ISL_726284, EPI_ISL_726287, EPI_ISL_726297, EPI_ISL_726299, EPI_ISL_726302, EPI_ISL_726304, EPI_ISL_726321, EPI_ISL_726324, EPI_ISL_726348, EPI_ISL_726352, EPI_ISL_726353, EPI_ISL_726363, EPI_ISL_726370, EPI_ISL_726373, EPI_ISL_726374, EPI_ISL_726377, EPI_ISL_726390, EPI_ISL_726391, EPI_ISL_726392, EPI_ISL_726398, EPI_ISL_726404, EPI_ISL_726413, EPI_ISL_726417, EPI_ISL_726418, EPI_ISL_726447, EPI_ISL_726448, EPI_ISL_726449, EPI_ISL_726453, EPI_ISL_726454, EPI_ISL_726460, EPI_ISL_726461, EPI_ISL_726462, EPI_ISL_726463, EPI_ISL_726464, EPI_ISL_726469, EPI_ISL_726471, EPI_ISL_726472, EPI_ISL_726474, EPI_ISL_726477, EPI_ISL_726478, EPI_ISL_726479, EPI_ISL_726480, EPI_ISL_726482, EPI_ISL_726485, EPI_ISL_726487, EPI_ISL_726488, EPI_ISL_726489, EPI_ISL_726492, EPI_ISL_726496, EPI_ISL_726497, EPI_ISL_726498, EPI_ISL_726504, EPI_ISL_726507, EPI_ISL_726513, EPI_ISL_726516, EPI_ISL_726531, EPI_ISL_726533, EPI_ISL_726536, EPI_ISL_726537, EPI_ISL_726539, EPI_ISL_726541, EPI_ISL_726545, EPI_ISL_726547, EPI_ISL_726549, EPI_ISL_726553, EPI_ISL_726554, EPI_ISL_726555, EPI_ISL_726558, EPI_ISL_726560, EPI_ISL_726565, EPI_ISL_726567, EPI_ISL_726568, EPI_ISL_726569, EPI_ISL_726570, EPI_ISL_726572, EPI_ISL_726573, EPI_ISL_726574, EPI_ISL_726575, EPI_ISL_726577, EPI_ISL_726578, EPI_ISL_726579, EPI_ISL_726580, EPI_ISL_726581, EPI_ISL_726584, EPI_ISL_726586, EPI_ISL_726587, EPI_ISL_726592, EPI_ISL_726597, EPI_ISL_726602, EPI_ISL_726603, EPI_ISL_726606, EPI_ISL_726607, EPI_ISL_726608, EPI_ISL_726609, EPI_ISL_726610, EPI_ISL_726613, EPI_ISL_726614, EPI_ISL_726615, EPI_ISL_726616, EPI_ISL_726617, EPI_ISL_726618 |                                                                         |                                          |                                                                                                                                                                                                                                                                                                                                                                          |  |  |  |  |  |  |
| see above                                                                                                                                                                                                                                                                                                                                                                                                                                                                                                                                                                                                                                                                                                                                                                                                                                                                                                                                                                                                                                                                                                                                                                                                                                                                                                                                                                                                                                                                                                                                                                                                                                                                                                                                                                                                                                                                                                                                                                                                                                                                                                                                                                                                                                                                                                                                                                                                                                                                                                                                                                                                                                                                                                                                                                                                                                                                                                                                                                                                                                                                                                                                                                                                                                                                                                                                                                                                                                                                                                                                                                                                                                                                                                                                                                                                                                                                                                                                                                                                                                                                                                                                                                                                                      | Wales Specialist Virology Centre Sequencing lab: Pathogen Genomics Unit | COVID-19 Genomics UK (COG-UK) Consortium | Catherine Moore, Johnathan Evans, Laura Gifford, Malorie Perry, Simon Cottrell, Angela Marchbank, Alec Birchley, Alexander Adams, Amy Gaskin, Bree Gatica-Wilcox, Jason Coombes, Joel Southgate, Lauren Gilbert, Lee Graham, Nicole Pacchiarini, Sara Kumziene-Summerhayes, Sarah Taylor, Sophie Jones, Sara Rey, Matthew Bull, Joanne Watkins, Sally Corden, Tom Connor |  |  |  |  |  |  |



We gratefully acknowledge the following Authors from the Originating laboratories responsible for obtaining the specimens, as well as the Submitting laboratories where the genome data were generated and shared via GISAID, on which this research is based.

All Submitters of data may be contacted directly via [www.gisaid.org](http://www.gisaid.org)

Authors are sorted alphabetically.

| Accession ID                                                                                                                                                                                                                                                                                                                                                                                                                                                                                                                                                                                                                                                                                                                                                                                                                                                                                                                                                                                                                                                                                                                                                                                                                                                                                                                                                                                                                                                                                                                                                                                                                                                                                                                                                                                                                                                                                                                                                                                                                                                   | Originating Laboratory                                                                                                         | Submitting Laboratory                                                                                                          | Authors                                                                                                                                                                                                                                                                                                                                                                 |
|----------------------------------------------------------------------------------------------------------------------------------------------------------------------------------------------------------------------------------------------------------------------------------------------------------------------------------------------------------------------------------------------------------------------------------------------------------------------------------------------------------------------------------------------------------------------------------------------------------------------------------------------------------------------------------------------------------------------------------------------------------------------------------------------------------------------------------------------------------------------------------------------------------------------------------------------------------------------------------------------------------------------------------------------------------------------------------------------------------------------------------------------------------------------------------------------------------------------------------------------------------------------------------------------------------------------------------------------------------------------------------------------------------------------------------------------------------------------------------------------------------------------------------------------------------------------------------------------------------------------------------------------------------------------------------------------------------------------------------------------------------------------------------------------------------------------------------------------------------------------------------------------------------------------------------------------------------------------------------------------------------------------------------------------------------------|--------------------------------------------------------------------------------------------------------------------------------|--------------------------------------------------------------------------------------------------------------------------------|-------------------------------------------------------------------------------------------------------------------------------------------------------------------------------------------------------------------------------------------------------------------------------------------------------------------------------------------------------------------------|
| EPI_ISL_726619, EPI_ISL_726620, EPI_ISL_726622, EPI_ISL_726623, EPI_ISL_726624, EPI_ISL_726626, EPI_ISL_726627, EPI_ISL_726628, EPI_ISL_726631, EPI_ISL_726635, EPI_ISL_726640, EPI_ISL_726644, EPI_ISL_726672, EPI_ISL_726684, EPI_ISL_726688, EPI_ISL_726697, EPI_ISL_726706, EPI_ISL_726708, EPI_ISL_726714, EPI_ISL_726715, EPI_ISL_726718, EPI_ISL_726721, EPI_ISL_726724, EPI_ISL_726728, EPI_ISL_726729, EPI_ISL_726735, EPI_ISL_726736, EPI_ISL_726737, EPI_ISL_726740, EPI_ISL_726748, EPI_ISL_726749, EPI_ISL_726751, EPI_ISL_726753, EPI_ISL_726754, EPI_ISL_726755, EPI_ISL_726760, EPI_ISL_726761, EPI_ISL_726768, EPI_ISL_726771, EPI_ISL_726772, EPI_ISL_726780, EPI_ISL_726782, EPI_ISL_726787, EPI_ISL_726788, EPI_ISL_726789, EPI_ISL_726792, EPI_ISL_726794, EPI_ISL_726796, EPI_ISL_726801, EPI_ISL_726802, EPI_ISL_726806, EPI_ISL_726808, EPI_ISL_726815, EPI_ISL_726817, EPI_ISL_726819, EPI_ISL_726820, EPI_ISL_726823, EPI_ISL_726824, EPI_ISL_726828, EPI_ISL_726830, EPI_ISL_726831, EPI_ISL_726833, EPI_ISL_726842, EPI_ISL_726845, EPI_ISL_726848, EPI_ISL_726870, EPI_ISL_726883, EPI_ISL_726891, EPI_ISL_726908, EPI_ISL_726954, EPI_ISL_726964, EPI_ISL_726967, EPI_ISL_726970, EPI_ISL_726974, EPI_ISL_726975, EPI_ISL_726977, EPI_ISL_726979, EPI_ISL_726980, EPI_ISL_726983, EPI_ISL_726985, EPI_ISL_726989, EPI_ISL_726990, EPI_ISL_726991, EPI_ISL_726992, EPI_ISL_726993, EPI_ISL_726995, EPI_ISL_726996, EPI_ISL_726997, EPI_ISL_727001, EPI_ISL_727004, EPI_ISL_727005, EPI_ISL_727006, EPI_ISL_727008, EPI_ISL_727009, EPI_ISL_727011, EPI_ISL_727015, EPI_ISL_727016, EPI_ISL_727017, EPI_ISL_727019, EPI_ISL_727020, EPI_ISL_727021, EPI_ISL_727023, EPI_ISL_727025, EPI_ISL_727027, EPI_ISL_727030, EPI_ISL_727218, EPI_ISL_727226, EPI_ISL_727416, EPI_ISL_727417, EPI_ISL_727442, EPI_ISL_727445, EPI_ISL_727446, EPI_ISL_727448, EPI_ISL_727449, EPI_ISL_727461, EPI_ISL_727466, EPI_ISL_727474, EPI_ISL_727477, EPI_ISL_727480, EPI_ISL_727483, EPI_ISL_727486, EPI_ISL_727495, EPI_ISL_727496, EPI_ISL_727499 |                                                                                                                                |                                                                                                                                |                                                                                                                                                                                                                                                                                                                                                                         |
| see above                                                                                                                                                                                                                                                                                                                                                                                                                                                                                                                                                                                                                                                                                                                                                                                                                                                                                                                                                                                                                                                                                                                                                                                                                                                                                                                                                                                                                                                                                                                                                                                                                                                                                                                                                                                                                                                                                                                                                                                                                                                      | Wales Specialist Virology Centre Sequencing lab: Pathogen Genomics Unit                                                        | COVID-19 Genomics UK (COG-UK) Consortium                                                                                       | Catherine Moore, Johnathan Evans, Laura Gifford, Malorie Perry, Simon Cottrell, Angela Marchbank, Alec Birchley, Alexander Adams, Amy Gaskin, Bree Gatca-Wilcox, Jason Coombes, Joel Southgate, Lauren Gilbert, Lee Graham, Nicole Pacchiarini, Sara Kumziene-Summerhayes, Sarah Taylor, Sophie Jones, Sara Rey, Matthew Bull, Joanne Watkins, Sally Corden, Tom Connor |
| EPI_ISL_728090, EPI_ISL_728094, EPI_ISL_728095, EPI_ISL_728098, EPI_ISL_728108, EPI_ISL_728113, EPI_ISL_728116, EPI_ISL_728120, EPI_ISL_728125, EPI_ISL_728126, EPI_ISL_728133                                                                                                                                                                                                                                                                                                                                                                                                                                                                                                                                                                                                                                                                                                                                                                                                                                                                                                                                                                                                                                                                                                                                                                                                                                                                                                                                                                                                                                                                                                                                                                                                                                                                                                                                                                                                                                                                                 |                                                                                                                                |                                                                                                                                |                                                                                                                                                                                                                                                                                                                                                                         |
| see above                                                                                                                                                                                                                                                                                                                                                                                                                                                                                                                                                                                                                                                                                                                                                                                                                                                                                                                                                                                                                                                                                                                                                                                                                                                                                                                                                                                                                                                                                                                                                                                                                                                                                                                                                                                                                                                                                                                                                                                                                                                      | University of Wisconsin-Madison AIDS Vaccine Research Laboratories                                                             | University of Wisconsin-Madison AIDS Vaccine Research Laboratories                                                             | Gage Moreno, Katarina Braun, et al. AIDS Vaccine Research Laboratories                                                                                                                                                                                                                                                                                                  |
| EPI_ISL_728249, EPI_ISL_728250, EPI_ISL_728251, EPI_ISL_728252                                                                                                                                                                                                                                                                                                                                                                                                                                                                                                                                                                                                                                                                                                                                                                                                                                                                                                                                                                                                                                                                                                                                                                                                                                                                                                                                                                                                                                                                                                                                                                                                                                                                                                                                                                                                                                                                                                                                                                                                 | Institute for Medical Research, Infectious Disease Research Centre, National Institutes of Health, Ministry of Health Malaysia | Institute for Medical Research, Infectious Disease Research Centre, National Institutes of Health, Ministry of Health Malaysia | Supphaj J, Kamel K, Mohd-Zawawi Z, Thayan R                                                                                                                                                                                                                                                                                                                             |
| EPI_ISL_728300                                                                                                                                                                                                                                                                                                                                                                                                                                                                                                                                                                                                                                                                                                                                                                                                                                                                                                                                                                                                                                                                                                                                                                                                                                                                                                                                                                                                                                                                                                                                                                                                                                                                                                                                                                                                                                                                                                                                                                                                                                                 | Lighthouse Lab in Glasgow                                                                                                      | Wellcome Sanger Institute for the COVID-19 Genomics UK (COG-UK) Consortium                                                     | Harper VanSteenhouse, Yumi Kasai, David Gray, Carol Clugston, Anna Dominiczak and Alex Alderton, Roberto Amato, Sonia Goncalves, Ewan Harrison, David K. Jackson, Ian Johnston, Dominic Kwiatkowski, Cordelia Langford, John Sillitoe on behalf of the Wellcome Sanger Institute COVID-19 Surveillance Team                                                             |
| EPI_ISL_728311, EPI_ISL_728315, EPI_ISL_728317, EPI_ISL_728319, EPI_ISL_728320                                                                                                                                                                                                                                                                                                                                                                                                                                                                                                                                                                                                                                                                                                                                                                                                                                                                                                                                                                                                                                                                                                                                                                                                                                                                                                                                                                                                                                                                                                                                                                                                                                                                                                                                                                                                                                                                                                                                                                                 | CNR Virus des Infections Respiratoires - France SUD                                                                            | CNR Virus des Infections Respiratoires - France SUD                                                                            | Antonin Bal, Gregory Destras, Claudia Gonzalez, Gwendolynne Burfin, Quentin Semanas, Martine Valette, Bruno Lina, Laurence Josset                                                                                                                                                                                                                                       |
| EPI_ISL_728564, EPI_ISL_728638, EPI_ISL_728639, EPI_ISL_728640, EPI_ISL_728641, EPI_ISL_728643, EPI_ISL_728674, EPI_ISL_728675, EPI_ISL_728676, EPI_ISL_728677, EPI_ISL_728678, EPI_ISL_728679, EPI_ISL_728680, EPI_ISL_728681, EPI_ISL_728684, EPI_ISL_728685, EPI_ISL_728687, EPI_ISL_728688, EPI_ISL_728696, EPI_ISL_728708, EPI_ISL_728709, EPI_ISL_728710, EPI_ISL_728711, EPI_ISL_728712, EPI_ISL_728713, EPI_ISL_728714, EPI_ISL_728715, EPI_ISL_728716, EPI_ISL_728717, EPI_ISL_728718, EPI_ISL_728719, EPI_ISL_728720, EPI_ISL_728723, EPI_ISL_728724, EPI_ISL_728727, EPI_ISL_728733, EPI_ISL_728735, EPI_ISL_728736, EPI_ISL_728737, EPI_ISL_728748, EPI_ISL_728749, EPI_ISL_728750, EPI_ISL_728751, EPI_ISL_728752, EPI_ISL_728753, EPI_ISL_728754, EPI_ISL_728755, EPI_ISL_728757, EPI_ISL_728758, EPI_ISL_728759, EPI_ISL_728760, EPI_ISL_728761, EPI_ISL_728762                                                                                                                                                                                                                                                                                                                                                                                                                                                                                                                                                                                                                                                                                                                                                                                                                                                                                                                                                                                                                                                                                                                                                                                 |                                                                                                                                |                                                                                                                                |                                                                                                                                                                                                                                                                                                                                                                         |
| see above                                                                                                                                                                                                                                                                                                                                                                                                                                                                                                                                                                                                                                                                                                                                                                                                                                                                                                                                                                                                                                                                                                                                                                                                                                                                                                                                                                                                                                                                                                                                                                                                                                                                                                                                                                                                                                                                                                                                                                                                                                                      | Dutch COVID-19 response team                                                                                                   | National Institute for Public Health and the Environment (RIVM)                                                                | Adam Meijer, Harry Vennema, Jeroen Cremer, Sharon van den Brink, Bas van der Veer, AnneMarie van den Brandt, Florian Zwagemaker, Dennis Schmitz, Chantal Reusken, on behalf of the national COVID-19 response team                                                                                                                                                      |
| EPI_ISL_729265, EPI_ISL_729266, EPI_ISL_729271, EPI_ISL_729273, EPI_ISL_729274, EPI_ISL_729277, EPI_ISL_729278, EPI_ISL_729280, EPI_ISL_729284, EPI_ISL_729285, EPI_ISL_729290, EPI_ISL_729291, EPI_ISL_729292, EPI_ISL_729293, EPI_ISL_729294, EPI_ISL_729295, EPI_ISL_729296, EPI_ISL_729297, EPI_ISL_729298, EPI_ISL_729300, EPI_ISL_729301, EPI_ISL_729302, EPI_ISL_729304, EPI_ISL_729305, EPI_ISL_729306, EPI_ISL_729308, EPI_ISL_729310, EPI_ISL_729311, EPI_ISL_729312, EPI_ISL_729313, EPI_ISL_729315, EPI_ISL_729316, EPI_ISL_729317, EPI_ISL_729319, EPI_ISL_729321, EPI_ISL_729322, EPI_ISL_729323, EPI_ISL_729324, EPI_ISL_729325, EPI_ISL_729326, EPI_ISL_729327, EPI_ISL_729329, EPI_ISL_729331, EPI_ISL_729332, EPI_ISL_729333, EPI_ISL_729334                                                                                                                                                                                                                                                                                                                                                                                                                                                                                                                                                                                                                                                                                                                                                                                                                                                                                                                                                                                                                                                                                                                                                                                                                                                                                                 |                                                                                                                                |                                                                                                                                |                                                                                                                                                                                                                                                                                                                                                                         |
| see above                                                                                                                                                                                                                                                                                                                                                                                                                                                                                                                                                                                                                                                                                                                                                                                                                                                                                                                                                                                                                                                                                                                                                                                                                                                                                                                                                                                                                                                                                                                                                                                                                                                                                                                                                                                                                                                                                                                                                                                                                                                      | Toronto Invasive Bacterial Diseases Network                                                                                    | McMaster University                                                                                                            | Allison McGeer, Patryk Aftanas, Hooman Derakhshani, Angel Li, Kuganya Nirmalarajah, Emily Panousis, Ahmed Draia, Jalees Nasir, Michael Surette, Samira Mubareka, Andrew G. McArthur                                                                                                                                                                                     |
| EPI_ISL_729420, EPI_ISL_729443, EPI_ISL_729445, EPI_ISL_729446, EPI_ISL_729447, EPI_ISL_729448, EPI_ISL_729452, EPI_ISL_729459, EPI_ISL_729645, EPI_ISL_729646, EPI_ISL_729648, EPI_ISL_729649, EPI_ISL_729650, EPI_ISL_729651, EPI_ISL_729652, EPI_ISL_729671, EPI_ISL_729672, EPI_ISL_729674, EPI_ISL_729675, EPI_ISL_729676, EPI_ISL_729677, EPI_ISL_729678, EPI_ISL_729679, EPI_ISL_729680, EPI_ISL_729681, EPI_ISL_729682, EPI_ISL_729684, EPI_ISL_729685, EPI_ISL_729687, EPI_ISL_729689, EPI_ISL_729690, EPI_ISL_729691, EPI_ISL_729692, EPI_ISL_729693, EPI_ISL_729694, EPI_ISL_729695, EPI_ISL_729696, EPI_ISL_729704, EPI_ISL_729715, EPI_ISL_729720, EPI_ISL_729722, EPI_ISL_729723, EPI_ISL_729728, EPI_ISL_729729, EPI_ISL_729730, EPI_ISL_729732, EPI_ISL_729733, EPI_ISL_729734                                                                                                                                                                                                                                                                                                                                                                                                                                                                                                                                                                                                                                                                                                                                                                                                                                                                                                                                                                                                                                                                                                                                                                                                                                                                 |                                                                                                                                |                                                                                                                                |                                                                                                                                                                                                                                                                                                                                                                         |
| see above                                                                                                                                                                                                                                                                                                                                                                                                                                                                                                                                                                                                                                                                                                                                                                                                                                                                                                                                                                                                                                                                                                                                                                                                                                                                                                                                                                                                                                                                                                                                                                                                                                                                                                                                                                                                                                                                                                                                                                                                                                                      | A. Krumbholz, Labor Dr. Krause und Kollegen MVZ GmbH, Kiel                                                                     | Charité Universitätsmedizin Berlin, Institut für Virologie                                                                     | Victor M Corman, Barbara Mühlemann, Jörn Beheim-Schwarzbach, Talitha Veith, Julia Schneider, Terry Jones, Christian Drosten                                                                                                                                                                                                                                             |
| EPI_ISL_730322                                                                                                                                                                                                                                                                                                                                                                                                                                                                                                                                                                                                                                                                                                                                                                                                                                                                                                                                                                                                                                                                                                                                                                                                                                                                                                                                                                                                                                                                                                                                                                                                                                                                                                                                                                                                                                                                                                                                                                                                                                                 | San Diego County Public Health Laboratory                                                                                      | Andersen lab at Scripps Research                                                                                               | SEARCH Alliance San Diego with Tracy Basler, Jovan Shephard, Brett Austin                                                                                                                                                                                                                                                                                               |
| EPI_ISL_731251, EPI_ISL_731253, EPI_ISL_731892                                                                                                                                                                                                                                                                                                                                                                                                                                                                                                                                                                                                                                                                                                                                                                                                                                                                                                                                                                                                                                                                                                                                                                                                                                                                                                                                                                                                                                                                                                                                                                                                                                                                                                                                                                                                                                                                                                                                                                                                                 | Lighthouse Lab in Milton Keynes                                                                                                | Wellcome Sanger Institute for the COVID-19 Genomics UK (COG-UK) Consortium                                                     | The Lighthouse Lab in Milton Keynes and Alex Alderton, Roberto Amato, Sonia Goncalves, Ewan Harrison, David K. Jackson, Ian Johnston, Dominic Kwiatkowski, Cordelia Langford, John Sillitoe on behalf of the Wellcome Sanger Institute COVID-19 Surveillance Team                                                                                                       |
| EPI_ISL_731894                                                                                                                                                                                                                                                                                                                                                                                                                                                                                                                                                                                                                                                                                                                                                                                                                                                                                                                                                                                                                                                                                                                                                                                                                                                                                                                                                                                                                                                                                                                                                                                                                                                                                                                                                                                                                                                                                                                                                                                                                                                 | Lighthouse Lab in Glasgow                                                                                                      | Wellcome Sanger Institute for the COVID-19 Genomics UK (COG-UK) Consortium                                                     | Harper VanSteenhouse, Yumi Kasai, David Gray, Carol Clugston, Anna Dominiczak and Alex Alderton, Roberto Amato, Sonia Goncalves, Ewan Harrison, David K. Jackson, Ian Johnston, Dominic Kwiatkowski, Cordelia Langford, John Sillitoe on behalf of the Wellcome Sanger Institute COVID-19 Surveillance Team                                                             |
| EPI_ISL_731920                                                                                                                                                                                                                                                                                                                                                                                                                                                                                                                                                                                                                                                                                                                                                                                                                                                                                                                                                                                                                                                                                                                                                                                                                                                                                                                                                                                                                                                                                                                                                                                                                                                                                                                                                                                                                                                                                                                                                                                                                                                 | Instituto Nacional de Saude (INSA)                                                                                             | Instituto Nacional de Saude (INSA)                                                                                             | Borges et al                                                                                                                                                                                                                                                                                                                                                            |
| EPI_ISL_731925, EPI_ISL_731927, EPI_ISL_731928, EPI_ISL_731929, EPI_ISL_731930                                                                                                                                                                                                                                                                                                                                                                                                                                                                                                                                                                                                                                                                                                                                                                                                                                                                                                                                                                                                                                                                                                                                                                                                                                                                                                                                                                                                                                                                                                                                                                                                                                                                                                                                                                                                                                                                                                                                                                                 | Instituto Nacional de Saude (INSA) and Instituto Gulbenkian de Ciencia (IGC)                                                   | Instituto Nacional de Saude (INSA) and Instituto Gulbenkian de Ciencia (IGC)                                                   | Borges et al                                                                                                                                                                                                                                                                                                                                                            |
| EPI_ISL_731951, EPI_ISL_731998, EPI_ISL_731999, EPI_ISL_732008, EPI_ISL_732009, EPI_ISL_732010, EPI_ISL_732011, EPI_ISL_732111, EPI_ISL_732112, EPI_ISL_732113                                                                                                                                                                                                                                                                                                                                                                                                                                                                                                                                                                                                                                                                                                                                                                                                                                                                                                                                                                                                                                                                                                                                                                                                                                                                                                                                                                                                                                                                                                                                                                                                                                                                                                                                                                                                                                                                                                 | Instituto Nacional de Saude (INSA)                                                                                             | Instituto Nacional de Saude (INSA)                                                                                             | Borges et al                                                                                                                                                                                                                                                                                                                                                            |
| EPI_ISL_732188, EPI_ISL_732189, EPI_ISL_732190, EPI_ISL_732191, EPI_ISL_732192, EPI_ISL_732193, EPI_ISL_732194, EPI_ISL_732195, EPI_ISL_732219, EPI_ISL_732220, EPI_ISL_732232, EPI_ISL_732233, EPI_ISL_732234, EPI_ISL_732235, EPI_ISL_732236, EPI_ISL_732237, EPI_ISL_732238, EPI_ISL_732239, EPI_ISL_732240, EPI_ISL_732241, EPI_ISL_732242, EPI_ISL_732243, EPI_ISL_732244, EPI_ISL_732245                                                                                                                                                                                                                                                                                                                                                                                                                                                                                                                                                                                                                                                                                                                                                                                                                                                                                                                                                                                                                                                                                                                                                                                                                                                                                                                                                                                                                                                                                                                                                                                                                                                                 |                                                                                                                                |                                                                                                                                |                                                                                                                                                                                                                                                                                                                                                                         |
| see above                                                                                                                                                                                                                                                                                                                                                                                                                                                                                                                                                                                                                                                                                                                                                                                                                                                                                                                                                                                                                                                                                                                                                                                                                                                                                                                                                                                                                                                                                                                                                                                                                                                                                                                                                                                                                                                                                                                                                                                                                                                      | Instituto Nacional de Saude (INSA) and Instituto Gulbenkian de Ciencia (IGC)                                                   | Instituto Nacional de Saude (INSA) and Instituto Gulbenkian de Ciencia (IGC)                                                   | Borges et al                                                                                                                                                                                                                                                                                                                                                            |
| EPI_ISL_732472, EPI_ISL_732493, EPI_ISL_732497, EPI_ISL_732498, EPI_ISL_732499, EPI_ISL_732500, EPI_ISL_732503, EPI_ISL_732505, EPI_ISL_732506, EPI_ISL_732508, EPI_ISL_732509, EPI_ISL_732512, EPI_ISL_732513, EPI_ISL_732514, EPI_ISL_732515, EPI_ISL_732522                                                                                                                                                                                                                                                                                                                                                                                                                                                                                                                                                                                                                                                                                                                                                                                                                                                                                                                                                                                                                                                                                                                                                                                                                                                                                                                                                                                                                                                                                                                                                                                                                                                                                                                                                                                                 |                                                                                                                                |                                                                                                                                |                                                                                                                                                                                                                                                                                                                                                                         |
| see above                                                                                                                                                                                                                                                                                                                                                                                                                                                                                                                                                                                                                                                                                                                                                                                                                                                                                                                                                                                                                                                                                                                                                                                                                                                                                                                                                                                                                                                                                                                                                                                                                                                                                                                                                                                                                                                                                                                                                                                                                                                      | National Virus Reference Laboratory                                                                                            | National Virus Reference Laboratory                                                                                            | Michael Carr, Gabriel Gonzalez, Jonathan Dean, Daniel Hare, Cillian F De Gascun                                                                                                                                                                                                                                                                                         |
| EPI_ISL_732654                                                                                                                                                                                                                                                                                                                                                                                                                                                                                                                                                                                                                                                                                                                                                                                                                                                                                                                                                                                                                                                                                                                                                                                                                                                                                                                                                                                                                                                                                                                                                                                                                                                                                                                                                                                                                                                                                                                                                                                                                                                 | Klinisk mikrobiologi                                                                                                           | The Public Health Agency of Sweden                                                                                             | Department of Microbiology, The Public Health Agency of Sweden                                                                                                                                                                                                                                                                                                          |
| EPI_ISL_732655                                                                                                                                                                                                                                                                                                                                                                                                                                                                                                                                                                                                                                                                                                                                                                                                                                                                                                                                                                                                                                                                                                                                                                                                                                                                                                                                                                                                                                                                                                                                                                                                                                                                                                                                                                                                                                                                                                                                                                                                                                                 | Narhalsan Fjällbacka VC                                                                                                        | The Public Health Agency of Sweden                                                                                             | Department of Microbiology, The Public Health Agency of Sweden                                                                                                                                                                                                                                                                                                          |
| EPI_ISL_732686, EPI_ISL_732687, EPI_ISL_732688, EPI_ISL_732689, EPI_ISL_732690, EPI_ISL_732691,                                                                                                                                                                                                                                                                                                                                                                                                                                                                                                                                                                                                                                                                                                                                                                                                                                                                                                                                                                                                                                                                                                                                                                                                                                                                                                                                                                                                                                                                                                                                                                                                                                                                                                                                                                                                                                                                                                                                                                | CNR Virus des Infections Respiratoires - France SUD                                                                            | CNR Virus des Infections Respiratoires - France SUD                                                                            | Antonin Bal, Gregory Destras, Claudia Gonzalez, Gwendolynne Burfin, Quentin Semanas, Martine Valette, Bruno Lina, Laurence Josset                                                                                                                                                                                                                                       |

|                                                                                                                                                                                                                                                                                                                                                                                |                                                                          |                                                                                                                                                                                         |                                                                                                                                                                                                                                                                                                                                                                                                                                                                          |
|--------------------------------------------------------------------------------------------------------------------------------------------------------------------------------------------------------------------------------------------------------------------------------------------------------------------------------------------------------------------------------|--------------------------------------------------------------------------|-----------------------------------------------------------------------------------------------------------------------------------------------------------------------------------------|--------------------------------------------------------------------------------------------------------------------------------------------------------------------------------------------------------------------------------------------------------------------------------------------------------------------------------------------------------------------------------------------------------------------------------------------------------------------------|
| EPI_ISL_732692                                                                                                                                                                                                                                                                                                                                                                 |                                                                          |                                                                                                                                                                                         |                                                                                                                                                                                                                                                                                                                                                                                                                                                                          |
| EPI_ISL_732949, EPI_ISL_732951, EPI_ISL_732952, EPI_ISL_732954, EPI_ISL_732955, EPI_ISL_732956, EPI_ISL_732957, EPI_ISL_732958, EPI_ISL_732959                                                                                                                                                                                                                                 | Department of Tropical Parasitology                                      | Laboratory of Recombinant Vaccines                                                                                                                                                      | Lukasz Rabalski, Maciej Kosinski, Teemu Smura, Kirsi Aaltonen, Ravi Kant, Tarja Sironen, Boguslaw Szewczyk, Maciej Grzybek                                                                                                                                                                                                                                                                                                                                               |
| EPI_ISL_732975, EPI_ISL_732980, EPI_ISL_732982, EPI_ISL_732987, EPI_ISL_732988, EPI_ISL_732986                                                                                                                                                                                                                                                                                 | WHO National Influenza Centre Russian Federation                         | WHO National Influenza Centre Russian Federation                                                                                                                                        | Andrey Komissarov, Artem Fadeev, Anna Ivanova, Kseniya Komissarova, Dmitry Bazhenov, Daria Danilenko, Ksenia Safina, Elena Nabieva, Georgii Bazykin, Dmitry Lioznov                                                                                                                                                                                                                                                                                                      |
| EPI_ISL_733493                                                                                                                                                                                                                                                                                                                                                                 | Omsk Research Institute of Natural Focal Infections                      | WHO National Influenza Centre Russian Federation                                                                                                                                        | Andrey Komissarov, Artem Fadeev, Anna Ivanova, Kseniya Komissarova, Dmitry Bazhenov, Daria Danilenko, Ekaterina Gradoboeva, Elena Poleshchuk, Aleksei Vasilenko, Valery Yakimenko, Ksenia Safina, Elena Nabieva, Georgii Bazykin, Dmitry Lioznov                                                                                                                                                                                                                         |
| EPI_ISL_734170, EPI_ISL_734172, EPI_ISL_734174, EPI_ISL_734180, EPI_ISL_734181, EPI_ISL_734187, EPI_ISL_734189, EPI_ISL_734191, EPI_ISL_734192, EPI_ISL_734193, EPI_ISL_734195, EPI_ISL_734196, EPI_ISL_734198, EPI_ISL_734200, EPI_ISL_734225                                                                                                                                 | see above                                                                | Virginia Division of Consolidated Laboratory Services (DCLS)                                                                                                                            | Virginia DCLS                                                                                                                                                                                                                                                                                                                                                                                                                                                            |
| EPI_ISL_734481                                                                                                                                                                                                                                                                                                                                                                 | Masonic Medical Research Institute                                       | Wadsworth Center, New York State Department of Health                                                                                                                                   | Kirsten St. George, Nathan Tucker, Ryan D. Pfeiffer, Daryl M. Lamson, Alexis Russel, Jonathan Plitnick, Navjot Singh, John Kelly, Sara Griesemer, Erasmus Schneider, Erica Lasek-Nesselquist                                                                                                                                                                                                                                                                             |
| EPI_ISL_735221, EPI_ISL_735222, EPI_ISL_735224, EPI_ISL_735225, EPI_ISL_735226, EPI_ISL_735227, EPI_ISL_735228, EPI_ISL_735229, EPI_ISL_735230, EPI_ISL_735231, EPI_ISL_735232, EPI_ISL_735233, EPI_ISL_735234, EPI_ISL_735235, EPI_ISL_735236, EPI_ISL_735237, EPI_ISL_735238                                                                                                 | see above                                                                | UZ Leuven, National Reference Laboratory for Coronaviruses, Laboratory Medicine, Leuven, Belgium                                                                                        | KU Leuven, Rega Institute, Clinical and Epidemiological Virology                                                                                                                                                                                                                                                                                                                                                                                                         |
| EPI_ISL_735490                                                                                                                                                                                                                                                                                                                                                                 | Rangamati General Hospital RT-PCR lab,                                   | Central Biological Research Laboratory and Department of Biochemistry and Molecular Biology                                                                                             | Robiul Hasan Bhuiyan, Md. Imranul Hoq, Md. Khondakar Raziur Rahman, Imam Hossen, Sajib Rudra, Md. Arif Hossain, Shanta Paul, Md. Omer Faruq, H. M. Abdullah Al Masud, Mohammad Omar Faruque                                                                                                                                                                                                                                                                              |
| EPI_ISL_735493                                                                                                                                                                                                                                                                                                                                                                 | Cox's Bazar Medicila College                                             | Central Biological Research Laboratory and Department of Biochemistry and Molecular Biology Central Biological Research Laboratory and Department of Biochemistry and Molecular Biology | Robiul Hasan Bhuiyan, Md. Imranul Hoq, Md. Khondakar Raziur Rahman, Imam Hossen, Sajib Rudra, Md. Arif Hossain, Shanta Paul, Md. Omer Faruq, H. M. Abdullah Al Masud, Mohammad Omar Faruque                                                                                                                                                                                                                                                                              |
| EPI_ISL_735494                                                                                                                                                                                                                                                                                                                                                                 | Cox's Bazar Medical College                                              | Central Biological Research Laboratory and Department of Biochemistry and Molecular Biology                                                                                             | Md. Imranul Hoq, Robiul Hasan Bhuiyan, Md. Khondakar Raziur Rahman, Imam Hossen, Sajib Rudra, Md. Arif Hossain, Shanta Paul, Md. Omer Faruq, Mohammad Omar Faruque, H. M. Abdullah Al Masud                                                                                                                                                                                                                                                                              |
| EPI_ISL_735496                                                                                                                                                                                                                                                                                                                                                                 | Chattogram Veterinary and Animal Sciences University                     | Central Biological Research Laboratory and Department of Biochemistry and Molecular Biology                                                                                             | Md. Imranul Hoq, Robiul Hasan Bhuiyan, Md. Khondakar Raziur Rahman, Imam Hossen, Sajib Rudra, Md. Arif Hossain, Shanta Paul, Md. Omer Faruq, Mohammad Omar Faruque, H. M. Abdullah Al Masud                                                                                                                                                                                                                                                                              |
| EPI_ISL_735497                                                                                                                                                                                                                                                                                                                                                                 | Chattogram Veterinary and Animal Sciences University                     | Central Biological Research Laboratory and Department of Biochemistry and Molecular Biology                                                                                             | Mohammad Omar Faruque, H. M. Abdullah Al Masud, Imam Hossen, Md. Khondakar Raziur Rahman, Sajib Rudra, Md. Arif Hossain, Shanta Paul, Md. Omer Faruq, Robiul Hasan Bhuiyan, Md. Imranul Hoq                                                                                                                                                                                                                                                                              |
| EPI_ISL_736926, EPI_ISL_736994                                                                                                                                                                                                                                                                                                                                                 | NHLS-IALCH                                                               | KRISP, KZN Research Innovation and Sequencing Platform                                                                                                                                  | Giandhari J, Pillay S, Lessells R, ChimukangaraB, Mdalose K, York D, Khan S, Tegally H, Wilkinson E, de Oliveira T                                                                                                                                                                                                                                                                                                                                                       |
| EPI_ISL_737182                                                                                                                                                                                                                                                                                                                                                                 | Michigan Department of Health and Human Services, Bureau of Laboratories | Michigan Department of Health and Human Services, Bureau of Laboratories                                                                                                                | Blankenship HM, Riner D, Soehnlen MK                                                                                                                                                                                                                                                                                                                                                                                                                                     |
| EPI_ISL_737236                                                                                                                                                                                                                                                                                                                                                                 | Los Angeles County PHL                                                   | Los Angeles County PHL                                                                                                                                                                  | P. Hemarajata et al.                                                                                                                                                                                                                                                                                                                                                                                                                                                     |
| EPI_ISL_737853                                                                                                                                                                                                                                                                                                                                                                 | Viollier AG                                                              | Department of Biosystems Science and Engineering, ETH Zürich                                                                                                                            | Chaoran Chen, Sarah Nadeau, Catharine Aquino, Ivan Topolsky, Philipp Jablonski, Lara Fuhrmann, David Dreifuss, Katharina Jahn, Andreia Cabral de Gouvea, Maria Domenica Moccia, Simon Gräter, Timothy Sykes, Lennart Opitz, Griffin White, Laura Neff, Doris Popovic, Andrea Patrignani, Jay Tracy, Ralph Schlapbach, Christiane Beckmann, Maurice Redondo, Olivier Kobel, Christoph Noppen, Sophie Seidel, Noemie Santamaria de Souza, Niko Beerenwinkel, Tanja Stadler |
| EPI_ISL_738064, EPI_ISL_738065                                                                                                                                                                                                                                                                                                                                                 | Department of Laboratory Medicine, National Taiwan University Hospital   | Microbial Genomics Core Lab, National Taiwan University Centers of Genomic and Precision Medicine                                                                                       | Shiou-Hwei Yeh, You-Yu Lin, Ya-Yun Lai, Chiao-Ling Li, Shan-Chwen Chang, Pei-Jer Chen, Sui-Yuan Chang                                                                                                                                                                                                                                                                                                                                                                    |
| EPI_ISL_738326, EPI_ISL_738327, EPI_ISL_738328, EPI_ISL_738329, EPI_ISL_738330, EPI_ISL_738331, EPI_ISL_738332, EPI_ISL_738333, EPI_ISL_738335, EPI_ISL_738336, EPI_ISL_738337, EPI_ISL_738338, EPI_ISL_738339, EPI_ISL_738340, EPI_ISL_738341, EPI_ISL_738342, EPI_ISL_738343, EPI_ISL_738344, EPI_ISL_738345, EPI_ISL_738346, EPI_ISL_738347, EPI_ISL_738348, EPI_ISL_738349 | see above                                                                | Landstuhl Regional Medical Center                                                                                                                                                       | United States Air Force School of Aerospace Medicine                                                                                                                                                                                                                                                                                                                                                                                                                     |
| EPI_ISL_738714, EPI_ISL_738723                                                                                                                                                                                                                                                                                                                                                 | Renegade                                                                 | Chan-Zuckerberg Biohub                                                                                                                                                                  | CZB Ciiahub Consortium                                                                                                                                                                                                                                                                                                                                                                                                                                                   |
| EPI_ISL_738729, EPI_ISL_738755, EPI_ISL_738761                                                                                                                                                                                                                                                                                                                                 | Orange County Public Health Lab                                          | Chan-Zuckerberg Biohub                                                                                                                                                                  | CZB Ciiahub Consortium                                                                                                                                                                                                                                                                                                                                                                                                                                                   |
| EPI_ISL_738770                                                                                                                                                                                                                                                                                                                                                                 | Renegade                                                                 | Chan-Zuckerberg Biohub                                                                                                                                                                  | CZB Ciiahub Consortium                                                                                                                                                                                                                                                                                                                                                                                                                                                   |
| EPI_ISL_738771, EPI_ISL_738805                                                                                                                                                                                                                                                                                                                                                 | Santa Clara County Public Health Laboratory                              | Chan-Zuckerberg Biohub                                                                                                                                                                  | CZB Ciiahub Consortium                                                                                                                                                                                                                                                                                                                                                                                                                                                   |
| EPI_ISL_738811, EPI_ISL_738818, EPI_ISL_738823, EPI_ISL_738840                                                                                                                                                                                                                                                                                                                 | Orange County Public Health Lab                                          | Chan-Zuckerberg Biohub                                                                                                                                                                  | CZB Ciiahub Consortium                                                                                                                                                                                                                                                                                                                                                                                                                                                   |
| EPI_ISL_738842                                                                                                                                                                                                                                                                                                                                                                 | Santa Clara County Public Health Laboratory                              | Chan-Zuckerberg Biohub                                                                                                                                                                  | CZB Ciiahub Consortium                                                                                                                                                                                                                                                                                                                                                                                                                                                   |
| EPI_ISL_738860                                                                                                                                                                                                                                                                                                                                                                 | Orange County Public Health Lab                                          | Chan-Zuckerberg Biohub                                                                                                                                                                  | CZB Ciiahub Consortium                                                                                                                                                                                                                                                                                                                                                                                                                                                   |
| EPI_ISL_738864                                                                                                                                                                                                                                                                                                                                                                 | Santa Clara County Public Health Laboratory                              | Chan-Zuckerberg Biohub                                                                                                                                                                  | CZB Ciiahub Consortium                                                                                                                                                                                                                                                                                                                                                                                                                                                   |
| EPI_ISL_738877                                                                                                                                                                                                                                                                                                                                                                 | Renegade                                                                 | Chan-Zuckerberg Biohub                                                                                                                                                                  | CZB Ciiahub Consortium                                                                                                                                                                                                                                                                                                                                                                                                                                                   |
| EPI_ISL_738893, EPI_ISL_738899                                                                                                                                                                                                                                                                                                                                                 | Orange County Public Health Lab                                          | Chan-Zuckerberg Biohub                                                                                                                                                                  | CZB Ciiahub Consortium                                                                                                                                                                                                                                                                                                                                                                                                                                                   |
| EPI_ISL_738903                                                                                                                                                                                                                                                                                                                                                                 | Santa Clara County Public Health Laboratory                              | Chan-Zuckerberg Biohub                                                                                                                                                                  | CZB Ciiahub Consortium                                                                                                                                                                                                                                                                                                                                                                                                                                                   |
| EPI_ISL_738905, EPI_ISL_738908, EPI_ISL_738928                                                                                                                                                                                                                                                                                                                                 | Orange County Public Health Lab                                          | Chan-Zuckerberg Biohub                                                                                                                                                                  | CZB Ciiahub Consortium                                                                                                                                                                                                                                                                                                                                                                                                                                                   |
| EPI_ISL_738941, EPI_ISL_738955                                                                                                                                                                                                                                                                                                                                                 | Santa Clara County Public Health Laboratory                              | Chan-Zuckerberg Biohub                                                                                                                                                                  | CZB Ciiahub Consortium                                                                                                                                                                                                                                                                                                                                                                                                                                                   |
| EPI_ISL_738968                                                                                                                                                                                                                                                                                                                                                                 | Orange County Public Health Lab                                          | Chan-Zuckerberg Biohub                                                                                                                                                                  | CZB Ciiahub Consortium                                                                                                                                                                                                                                                                                                                                                                                                                                                   |
| EPI_ISL_738984                                                                                                                                                                                                                                                                                                                                                                 | Santa Clara County Public Health Laboratory                              | Chan-Zuckerberg Biohub                                                                                                                                                                  | CZB Ciiahub Consortium                                                                                                                                                                                                                                                                                                                                                                                                                                                   |
| EPI_ISL_738991                                                                                                                                                                                                                                                                                                                                                                 | Orange County Public Health Lab                                          | Chan-Zuckerberg Biohub                                                                                                                                                                  | CZB Ciiahub Consortium                                                                                                                                                                                                                                                                                                                                                                                                                                                   |
| EPI_ISL_738994, EPI_ISL_739008                                                                                                                                                                                                                                                                                                                                                 | Santa Clara County Public Health Laboratory                              | Chan-Zuckerberg Biohub                                                                                                                                                                  | CZB Ciiahub Consortium                                                                                                                                                                                                                                                                                                                                                                                                                                                   |
| EPI_ISL_739014                                                                                                                                                                                                                                                                                                                                                                 | Renegade                                                                 | Chan-Zuckerberg Biohub                                                                                                                                                                  | CZB Ciiahub Consortium                                                                                                                                                                                                                                                                                                                                                                                                                                                   |
| EPI_ISL_739034                                                                                                                                                                                                                                                                                                                                                                 | Orange County Public Health Lab                                          | Chan-Zuckerberg Biohub                                                                                                                                                                  | CZB Ciiahub Consortium                                                                                                                                                                                                                                                                                                                                                                                                                                                   |
| EPI_ISL_739053                                                                                                                                                                                                                                                                                                                                                                 | Santa Clara County Public Health Laboratory                              | Chan-Zuckerberg Biohub                                                                                                                                                                  | CZB Ciiahub Consortium                                                                                                                                                                                                                                                                                                                                                                                                                                                   |
| EPI_ISL_739063                                                                                                                                                                                                                                                                                                                                                                 | Orange County Public Health Lab                                          | Chan-Zuckerberg Biohub                                                                                                                                                                  | CZB Ciiahub Consortium                                                                                                                                                                                                                                                                                                                                                                                                                                                   |

|                                                                                                                                                                                                                                                                                                                                                                                                                                                                                                                                                                                                                                                                                                                                                                                                                                                                                                                                                                                                                                                                                                                                                                                                                                                                                                                                                                                                                                                                                                                                                                                                                                                                                                                                                                                                                                                                                                                                                                                                                                                                                                                                                                                                                                                                                                                                                                                                                                                                                                                                                                                |                                                                        |                                                                                                   |                                                                                                                       |
|--------------------------------------------------------------------------------------------------------------------------------------------------------------------------------------------------------------------------------------------------------------------------------------------------------------------------------------------------------------------------------------------------------------------------------------------------------------------------------------------------------------------------------------------------------------------------------------------------------------------------------------------------------------------------------------------------------------------------------------------------------------------------------------------------------------------------------------------------------------------------------------------------------------------------------------------------------------------------------------------------------------------------------------------------------------------------------------------------------------------------------------------------------------------------------------------------------------------------------------------------------------------------------------------------------------------------------------------------------------------------------------------------------------------------------------------------------------------------------------------------------------------------------------------------------------------------------------------------------------------------------------------------------------------------------------------------------------------------------------------------------------------------------------------------------------------------------------------------------------------------------------------------------------------------------------------------------------------------------------------------------------------------------------------------------------------------------------------------------------------------------------------------------------------------------------------------------------------------------------------------------------------------------------------------------------------------------------------------------------------------------------------------------------------------------------------------------------------------------------------------------------------------------------------------------------------------------|------------------------------------------------------------------------|---------------------------------------------------------------------------------------------------|-----------------------------------------------------------------------------------------------------------------------|
| EPI_ISL_739066                                                                                                                                                                                                                                                                                                                                                                                                                                                                                                                                                                                                                                                                                                                                                                                                                                                                                                                                                                                                                                                                                                                                                                                                                                                                                                                                                                                                                                                                                                                                                                                                                                                                                                                                                                                                                                                                                                                                                                                                                                                                                                                                                                                                                                                                                                                                                                                                                                                                                                                                                                 | Santa Clara County Public Health Laboratory                            | Chan-Zuckerberg Biohub                                                                            | CZB Cliahub Consortium                                                                                                |
| EPI_ISL_739069, EPI_ISL_739071                                                                                                                                                                                                                                                                                                                                                                                                                                                                                                                                                                                                                                                                                                                                                                                                                                                                                                                                                                                                                                                                                                                                                                                                                                                                                                                                                                                                                                                                                                                                                                                                                                                                                                                                                                                                                                                                                                                                                                                                                                                                                                                                                                                                                                                                                                                                                                                                                                                                                                                                                 | Orange County Public Health Lab                                        | Chan-Zuckerberg Biohub                                                                            | CZB Cliahub Consortium                                                                                                |
| EPI_ISL_739076                                                                                                                                                                                                                                                                                                                                                                                                                                                                                                                                                                                                                                                                                                                                                                                                                                                                                                                                                                                                                                                                                                                                                                                                                                                                                                                                                                                                                                                                                                                                                                                                                                                                                                                                                                                                                                                                                                                                                                                                                                                                                                                                                                                                                                                                                                                                                                                                                                                                                                                                                                 | Santa Clara County Public Health Laboratory                            | Chan-Zuckerberg Biohub                                                                            | CZB Cliahub Consortium                                                                                                |
| EPI_ISL_739094, EPI_ISL_739097                                                                                                                                                                                                                                                                                                                                                                                                                                                                                                                                                                                                                                                                                                                                                                                                                                                                                                                                                                                                                                                                                                                                                                                                                                                                                                                                                                                                                                                                                                                                                                                                                                                                                                                                                                                                                                                                                                                                                                                                                                                                                                                                                                                                                                                                                                                                                                                                                                                                                                                                                 | Orange County Public Health Lab                                        | Chan-Zuckerberg Biohub                                                                            | CZB Cliahub Consortium                                                                                                |
| EPI_ISL_739123                                                                                                                                                                                                                                                                                                                                                                                                                                                                                                                                                                                                                                                                                                                                                                                                                                                                                                                                                                                                                                                                                                                                                                                                                                                                                                                                                                                                                                                                                                                                                                                                                                                                                                                                                                                                                                                                                                                                                                                                                                                                                                                                                                                                                                                                                                                                                                                                                                                                                                                                                                 | Humboldt County Public Health Laboratory                               | Chan-Zuckerberg Biohub                                                                            | CZB Cliahub Consortium                                                                                                |
| EPI_ISL_739125                                                                                                                                                                                                                                                                                                                                                                                                                                                                                                                                                                                                                                                                                                                                                                                                                                                                                                                                                                                                                                                                                                                                                                                                                                                                                                                                                                                                                                                                                                                                                                                                                                                                                                                                                                                                                                                                                                                                                                                                                                                                                                                                                                                                                                                                                                                                                                                                                                                                                                                                                                 | Orange County Public Health Lab                                        | Chan-Zuckerberg Biohub                                                                            | CZB Cliahub Consortium                                                                                                |
| EPI_ISL_739146, EPI_ISL_739153                                                                                                                                                                                                                                                                                                                                                                                                                                                                                                                                                                                                                                                                                                                                                                                                                                                                                                                                                                                                                                                                                                                                                                                                                                                                                                                                                                                                                                                                                                                                                                                                                                                                                                                                                                                                                                                                                                                                                                                                                                                                                                                                                                                                                                                                                                                                                                                                                                                                                                                                                 | Santa Clara County Public Health Laboratory                            | Chan-Zuckerberg Biohub                                                                            | CZB Cliahub Consortium                                                                                                |
| EPI_ISL_739154, EPI_ISL_739191                                                                                                                                                                                                                                                                                                                                                                                                                                                                                                                                                                                                                                                                                                                                                                                                                                                                                                                                                                                                                                                                                                                                                                                                                                                                                                                                                                                                                                                                                                                                                                                                                                                                                                                                                                                                                                                                                                                                                                                                                                                                                                                                                                                                                                                                                                                                                                                                                                                                                                                                                 | Orange County Public Health Lab                                        | Chan-Zuckerberg Biohub                                                                            | CZB Cliahub Consortium                                                                                                |
| EPI_ISL_739204                                                                                                                                                                                                                                                                                                                                                                                                                                                                                                                                                                                                                                                                                                                                                                                                                                                                                                                                                                                                                                                                                                                                                                                                                                                                                                                                                                                                                                                                                                                                                                                                                                                                                                                                                                                                                                                                                                                                                                                                                                                                                                                                                                                                                                                                                                                                                                                                                                                                                                                                                                 | Santa Clara County Public Health Laboratory                            | Chan-Zuckerberg Biohub                                                                            | CZB Cliahub Consortium                                                                                                |
| EPI_ISL_739211, EPI_ISL_739222, EPI_ISL_739230, EPI_ISL_739238                                                                                                                                                                                                                                                                                                                                                                                                                                                                                                                                                                                                                                                                                                                                                                                                                                                                                                                                                                                                                                                                                                                                                                                                                                                                                                                                                                                                                                                                                                                                                                                                                                                                                                                                                                                                                                                                                                                                                                                                                                                                                                                                                                                                                                                                                                                                                                                                                                                                                                                 | Orange County Public Health Lab                                        | Chan-Zuckerberg Biohub                                                                            | CZB Cliahub Consortium                                                                                                |
| EPI_ISL_739252, EPI_ISL_739253                                                                                                                                                                                                                                                                                                                                                                                                                                                                                                                                                                                                                                                                                                                                                                                                                                                                                                                                                                                                                                                                                                                                                                                                                                                                                                                                                                                                                                                                                                                                                                                                                                                                                                                                                                                                                                                                                                                                                                                                                                                                                                                                                                                                                                                                                                                                                                                                                                                                                                                                                 | Santa Clara County Public Health Laboratory                            | Chan-Zuckerberg Biohub                                                                            | CZB Cliahub Consortium                                                                                                |
| EPI_ISL_739266                                                                                                                                                                                                                                                                                                                                                                                                                                                                                                                                                                                                                                                                                                                                                                                                                                                                                                                                                                                                                                                                                                                                                                                                                                                                                                                                                                                                                                                                                                                                                                                                                                                                                                                                                                                                                                                                                                                                                                                                                                                                                                                                                                                                                                                                                                                                                                                                                                                                                                                                                                 | Orange County Public Health Lab                                        | Chan-Zuckerberg Biohub                                                                            | CZB Cliahub Consortium                                                                                                |
| EPI_ISL_739269                                                                                                                                                                                                                                                                                                                                                                                                                                                                                                                                                                                                                                                                                                                                                                                                                                                                                                                                                                                                                                                                                                                                                                                                                                                                                                                                                                                                                                                                                                                                                                                                                                                                                                                                                                                                                                                                                                                                                                                                                                                                                                                                                                                                                                                                                                                                                                                                                                                                                                                                                                 | Humboldt County Public Health Laboratory                               | Chan-Zuckerberg Biohub                                                                            | CZB Cliahub Consortium                                                                                                |
| EPI_ISL_739276                                                                                                                                                                                                                                                                                                                                                                                                                                                                                                                                                                                                                                                                                                                                                                                                                                                                                                                                                                                                                                                                                                                                                                                                                                                                                                                                                                                                                                                                                                                                                                                                                                                                                                                                                                                                                                                                                                                                                                                                                                                                                                                                                                                                                                                                                                                                                                                                                                                                                                                                                                 | Orange County Public Health Lab                                        | Chan-Zuckerberg Biohub                                                                            | CZB Cliahub Consortium                                                                                                |
| EPI_ISL_739277                                                                                                                                                                                                                                                                                                                                                                                                                                                                                                                                                                                                                                                                                                                                                                                                                                                                                                                                                                                                                                                                                                                                                                                                                                                                                                                                                                                                                                                                                                                                                                                                                                                                                                                                                                                                                                                                                                                                                                                                                                                                                                                                                                                                                                                                                                                                                                                                                                                                                                                                                                 | Santa Clara County Public Health Laboratory                            | Chan-Zuckerberg Biohub                                                                            | CZB Cliahub Consortium                                                                                                |
| EPI_ISL_739289                                                                                                                                                                                                                                                                                                                                                                                                                                                                                                                                                                                                                                                                                                                                                                                                                                                                                                                                                                                                                                                                                                                                                                                                                                                                                                                                                                                                                                                                                                                                                                                                                                                                                                                                                                                                                                                                                                                                                                                                                                                                                                                                                                                                                                                                                                                                                                                                                                                                                                                                                                 | Orange County Public Health Lab                                        | Chan-Zuckerberg Biohub                                                                            | CZB Cliahub Consortium                                                                                                |
| EPI_ISL_739313                                                                                                                                                                                                                                                                                                                                                                                                                                                                                                                                                                                                                                                                                                                                                                                                                                                                                                                                                                                                                                                                                                                                                                                                                                                                                                                                                                                                                                                                                                                                                                                                                                                                                                                                                                                                                                                                                                                                                                                                                                                                                                                                                                                                                                                                                                                                                                                                                                                                                                                                                                 | Humboldt County Public Health Laboratory                               | Chan-Zuckerberg Biohub                                                                            | CZB Cliahub Consortium                                                                                                |
| EPI_ISL_739316                                                                                                                                                                                                                                                                                                                                                                                                                                                                                                                                                                                                                                                                                                                                                                                                                                                                                                                                                                                                                                                                                                                                                                                                                                                                                                                                                                                                                                                                                                                                                                                                                                                                                                                                                                                                                                                                                                                                                                                                                                                                                                                                                                                                                                                                                                                                                                                                                                                                                                                                                                 | Renegade                                                               | Chan-Zuckerberg Biohub                                                                            | CZB Cliahub Consortium                                                                                                |
| EPI_ISL_739320, EPI_ISL_739327                                                                                                                                                                                                                                                                                                                                                                                                                                                                                                                                                                                                                                                                                                                                                                                                                                                                                                                                                                                                                                                                                                                                                                                                                                                                                                                                                                                                                                                                                                                                                                                                                                                                                                                                                                                                                                                                                                                                                                                                                                                                                                                                                                                                                                                                                                                                                                                                                                                                                                                                                 | Santa Clara County Public Health Laboratory                            | Chan-Zuckerberg Biohub                                                                            | CZB Cliahub Consortium                                                                                                |
| EPI_ISL_739379                                                                                                                                                                                                                                                                                                                                                                                                                                                                                                                                                                                                                                                                                                                                                                                                                                                                                                                                                                                                                                                                                                                                                                                                                                                                                                                                                                                                                                                                                                                                                                                                                                                                                                                                                                                                                                                                                                                                                                                                                                                                                                                                                                                                                                                                                                                                                                                                                                                                                                                                                                 | Orange County Public Health Lab                                        | Chan-Zuckerberg Biohub                                                                            | CZB Cliahub Consortium                                                                                                |
| EPI_ISL_739380, EPI_ISL_739381                                                                                                                                                                                                                                                                                                                                                                                                                                                                                                                                                                                                                                                                                                                                                                                                                                                                                                                                                                                                                                                                                                                                                                                                                                                                                                                                                                                                                                                                                                                                                                                                                                                                                                                                                                                                                                                                                                                                                                                                                                                                                                                                                                                                                                                                                                                                                                                                                                                                                                                                                 | Santa Clara County Public Health Laboratory                            | Chan-Zuckerberg Biohub                                                                            | CZB Cliahub Consortium                                                                                                |
| EPI_ISL_739403                                                                                                                                                                                                                                                                                                                                                                                                                                                                                                                                                                                                                                                                                                                                                                                                                                                                                                                                                                                                                                                                                                                                                                                                                                                                                                                                                                                                                                                                                                                                                                                                                                                                                                                                                                                                                                                                                                                                                                                                                                                                                                                                                                                                                                                                                                                                                                                                                                                                                                                                                                 | Humboldt County Public Health Laboratory                               | Chan-Zuckerberg Biohub                                                                            | CZB Cliahub Consortium                                                                                                |
| EPI_ISL_739410                                                                                                                                                                                                                                                                                                                                                                                                                                                                                                                                                                                                                                                                                                                                                                                                                                                                                                                                                                                                                                                                                                                                                                                                                                                                                                                                                                                                                                                                                                                                                                                                                                                                                                                                                                                                                                                                                                                                                                                                                                                                                                                                                                                                                                                                                                                                                                                                                                                                                                                                                                 | Orange County Public Health Lab                                        | Chan-Zuckerberg Biohub                                                                            | CZB Cliahub Consortium                                                                                                |
| EPI_ISL_739416                                                                                                                                                                                                                                                                                                                                                                                                                                                                                                                                                                                                                                                                                                                                                                                                                                                                                                                                                                                                                                                                                                                                                                                                                                                                                                                                                                                                                                                                                                                                                                                                                                                                                                                                                                                                                                                                                                                                                                                                                                                                                                                                                                                                                                                                                                                                                                                                                                                                                                                                                                 | Santa Clara County Public Health Laboratory                            | Chan-Zuckerberg Biohub                                                                            | CZB Cliahub Consortium                                                                                                |
| EPI_ISL_739441                                                                                                                                                                                                                                                                                                                                                                                                                                                                                                                                                                                                                                                                                                                                                                                                                                                                                                                                                                                                                                                                                                                                                                                                                                                                                                                                                                                                                                                                                                                                                                                                                                                                                                                                                                                                                                                                                                                                                                                                                                                                                                                                                                                                                                                                                                                                                                                                                                                                                                                                                                 | Orange County Public Health Lab                                        | Chan-Zuckerberg Biohub                                                                            | CZB Cliahub Consortium                                                                                                |
| EPI_ISL_739457                                                                                                                                                                                                                                                                                                                                                                                                                                                                                                                                                                                                                                                                                                                                                                                                                                                                                                                                                                                                                                                                                                                                                                                                                                                                                                                                                                                                                                                                                                                                                                                                                                                                                                                                                                                                                                                                                                                                                                                                                                                                                                                                                                                                                                                                                                                                                                                                                                                                                                                                                                 | Santa Clara County Public Health Laboratory                            | Chan-Zuckerberg Biohub                                                                            | CZB Cliahub Consortium                                                                                                |
| EPI_ISL_739466                                                                                                                                                                                                                                                                                                                                                                                                                                                                                                                                                                                                                                                                                                                                                                                                                                                                                                                                                                                                                                                                                                                                                                                                                                                                                                                                                                                                                                                                                                                                                                                                                                                                                                                                                                                                                                                                                                                                                                                                                                                                                                                                                                                                                                                                                                                                                                                                                                                                                                                                                                 | Renegade                                                               | Chan-Zuckerberg Biohub                                                                            | CZB Cliahub Consortium                                                                                                |
| EPI_ISL_739476                                                                                                                                                                                                                                                                                                                                                                                                                                                                                                                                                                                                                                                                                                                                                                                                                                                                                                                                                                                                                                                                                                                                                                                                                                                                                                                                                                                                                                                                                                                                                                                                                                                                                                                                                                                                                                                                                                                                                                                                                                                                                                                                                                                                                                                                                                                                                                                                                                                                                                                                                                 | Santa Clara County Public Health Laboratory                            | Chan-Zuckerberg Biohub                                                                            | CZB Cliahub Consortium                                                                                                |
| EPI_ISL_739478                                                                                                                                                                                                                                                                                                                                                                                                                                                                                                                                                                                                                                                                                                                                                                                                                                                                                                                                                                                                                                                                                                                                                                                                                                                                                                                                                                                                                                                                                                                                                                                                                                                                                                                                                                                                                                                                                                                                                                                                                                                                                                                                                                                                                                                                                                                                                                                                                                                                                                                                                                 | Renegade                                                               | Chan-Zuckerberg Biohub                                                                            | CZB Cliahub Consortium                                                                                                |
| EPI_ISL_739482                                                                                                                                                                                                                                                                                                                                                                                                                                                                                                                                                                                                                                                                                                                                                                                                                                                                                                                                                                                                                                                                                                                                                                                                                                                                                                                                                                                                                                                                                                                                                                                                                                                                                                                                                                                                                                                                                                                                                                                                                                                                                                                                                                                                                                                                                                                                                                                                                                                                                                                                                                 | Orange County Public Health Lab                                        | Chan-Zuckerberg Biohub                                                                            | CZB Cliahub Consortium                                                                                                |
| EPI_ISL_739487, EPI_ISL_739491                                                                                                                                                                                                                                                                                                                                                                                                                                                                                                                                                                                                                                                                                                                                                                                                                                                                                                                                                                                                                                                                                                                                                                                                                                                                                                                                                                                                                                                                                                                                                                                                                                                                                                                                                                                                                                                                                                                                                                                                                                                                                                                                                                                                                                                                                                                                                                                                                                                                                                                                                 | Santa Clara County Public Health Laboratory                            | Chan-Zuckerberg Biohub                                                                            | CZB Cliahub Consortium                                                                                                |
| EPI_ISL_739513, EPI_ISL_739524                                                                                                                                                                                                                                                                                                                                                                                                                                                                                                                                                                                                                                                                                                                                                                                                                                                                                                                                                                                                                                                                                                                                                                                                                                                                                                                                                                                                                                                                                                                                                                                                                                                                                                                                                                                                                                                                                                                                                                                                                                                                                                                                                                                                                                                                                                                                                                                                                                                                                                                                                 | Orange County Public Health Lab                                        | Chan-Zuckerberg Biohub                                                                            | CZB Cliahub Consortium                                                                                                |
| EPI_ISL_739543                                                                                                                                                                                                                                                                                                                                                                                                                                                                                                                                                                                                                                                                                                                                                                                                                                                                                                                                                                                                                                                                                                                                                                                                                                                                                                                                                                                                                                                                                                                                                                                                                                                                                                                                                                                                                                                                                                                                                                                                                                                                                                                                                                                                                                                                                                                                                                                                                                                                                                                                                                 | Santa Clara County Public Health Laboratory                            | Chan-Zuckerberg Biohub                                                                            | CZB Cliahub Consortium                                                                                                |
| EPI_ISL_739547, EPI_ISL_739559                                                                                                                                                                                                                                                                                                                                                                                                                                                                                                                                                                                                                                                                                                                                                                                                                                                                                                                                                                                                                                                                                                                                                                                                                                                                                                                                                                                                                                                                                                                                                                                                                                                                                                                                                                                                                                                                                                                                                                                                                                                                                                                                                                                                                                                                                                                                                                                                                                                                                                                                                 | Orange County Public Health Lab                                        | Chan-Zuckerberg Biohub                                                                            | CZB Cliahub Consortium                                                                                                |
| EPI_ISL_739562                                                                                                                                                                                                                                                                                                                                                                                                                                                                                                                                                                                                                                                                                                                                                                                                                                                                                                                                                                                                                                                                                                                                                                                                                                                                                                                                                                                                                                                                                                                                                                                                                                                                                                                                                                                                                                                                                                                                                                                                                                                                                                                                                                                                                                                                                                                                                                                                                                                                                                                                                                 | Santa Clara County Public Health Laboratory                            | Chan-Zuckerberg Biohub                                                                            | CZB Cliahub Consortium                                                                                                |
| EPI_ISL_739564                                                                                                                                                                                                                                                                                                                                                                                                                                                                                                                                                                                                                                                                                                                                                                                                                                                                                                                                                                                                                                                                                                                                                                                                                                                                                                                                                                                                                                                                                                                                                                                                                                                                                                                                                                                                                                                                                                                                                                                                                                                                                                                                                                                                                                                                                                                                                                                                                                                                                                                                                                 | Renegade                                                               | Chan-Zuckerberg Biohub                                                                            | CZB Cliahub Consortium                                                                                                |
| EPI_ISL_739568, EPI_ISL_739570, EPI_ISL_739573, EPI_ISL_739577                                                                                                                                                                                                                                                                                                                                                                                                                                                                                                                                                                                                                                                                                                                                                                                                                                                                                                                                                                                                                                                                                                                                                                                                                                                                                                                                                                                                                                                                                                                                                                                                                                                                                                                                                                                                                                                                                                                                                                                                                                                                                                                                                                                                                                                                                                                                                                                                                                                                                                                 | Orange County Public Health Lab                                        | Chan-Zuckerberg Biohub                                                                            | CZB Cliahub Consortium                                                                                                |
| EPI_ISL_739579                                                                                                                                                                                                                                                                                                                                                                                                                                                                                                                                                                                                                                                                                                                                                                                                                                                                                                                                                                                                                                                                                                                                                                                                                                                                                                                                                                                                                                                                                                                                                                                                                                                                                                                                                                                                                                                                                                                                                                                                                                                                                                                                                                                                                                                                                                                                                                                                                                                                                                                                                                 | Santa Clara County Public Health Laboratory                            | Chan-Zuckerberg Biohub                                                                            | CZB Cliahub Consortium                                                                                                |
| EPI_ISL_739582                                                                                                                                                                                                                                                                                                                                                                                                                                                                                                                                                                                                                                                                                                                                                                                                                                                                                                                                                                                                                                                                                                                                                                                                                                                                                                                                                                                                                                                                                                                                                                                                                                                                                                                                                                                                                                                                                                                                                                                                                                                                                                                                                                                                                                                                                                                                                                                                                                                                                                                                                                 | Orange County Public Health Lab                                        | Chan-Zuckerberg Biohub                                                                            | CZB Cliahub Consortium                                                                                                |
| EPI_ISL_739584, EPI_ISL_739596                                                                                                                                                                                                                                                                                                                                                                                                                                                                                                                                                                                                                                                                                                                                                                                                                                                                                                                                                                                                                                                                                                                                                                                                                                                                                                                                                                                                                                                                                                                                                                                                                                                                                                                                                                                                                                                                                                                                                                                                                                                                                                                                                                                                                                                                                                                                                                                                                                                                                                                                                 | Santa Clara County Public Health Laboratory                            | Chan-Zuckerberg Biohub                                                                            | CZB Cliahub Consortium                                                                                                |
| EPI_ISL_739607                                                                                                                                                                                                                                                                                                                                                                                                                                                                                                                                                                                                                                                                                                                                                                                                                                                                                                                                                                                                                                                                                                                                                                                                                                                                                                                                                                                                                                                                                                                                                                                                                                                                                                                                                                                                                                                                                                                                                                                                                                                                                                                                                                                                                                                                                                                                                                                                                                                                                                                                                                 | Orange County Public Health Lab                                        | Chan-Zuckerberg Biohub                                                                            | CZB Cliahub Consortium                                                                                                |
| EPI_ISL_739612                                                                                                                                                                                                                                                                                                                                                                                                                                                                                                                                                                                                                                                                                                                                                                                                                                                                                                                                                                                                                                                                                                                                                                                                                                                                                                                                                                                                                                                                                                                                                                                                                                                                                                                                                                                                                                                                                                                                                                                                                                                                                                                                                                                                                                                                                                                                                                                                                                                                                                                                                                 | Santa Clara County Public Health Laboratory                            | Chan-Zuckerberg Biohub                                                                            | CZB Cliahub Consortium                                                                                                |
| EPI_ISL_739625, EPI_ISL_739627, EPI_ISL_739636                                                                                                                                                                                                                                                                                                                                                                                                                                                                                                                                                                                                                                                                                                                                                                                                                                                                                                                                                                                                                                                                                                                                                                                                                                                                                                                                                                                                                                                                                                                                                                                                                                                                                                                                                                                                                                                                                                                                                                                                                                                                                                                                                                                                                                                                                                                                                                                                                                                                                                                                 | Orange County Public Health Lab                                        | Chan-Zuckerberg Biohub                                                                            | CZB Cliahub Consortium                                                                                                |
| EPI_ISL_739650                                                                                                                                                                                                                                                                                                                                                                                                                                                                                                                                                                                                                                                                                                                                                                                                                                                                                                                                                                                                                                                                                                                                                                                                                                                                                                                                                                                                                                                                                                                                                                                                                                                                                                                                                                                                                                                                                                                                                                                                                                                                                                                                                                                                                                                                                                                                                                                                                                                                                                                                                                 | Santa Clara County Public Health Laboratory                            | Chan-Zuckerberg Biohub                                                                            | CZB Cliahub Consortium                                                                                                |
| EPI_ISL_739655                                                                                                                                                                                                                                                                                                                                                                                                                                                                                                                                                                                                                                                                                                                                                                                                                                                                                                                                                                                                                                                                                                                                                                                                                                                                                                                                                                                                                                                                                                                                                                                                                                                                                                                                                                                                                                                                                                                                                                                                                                                                                                                                                                                                                                                                                                                                                                                                                                                                                                                                                                 | Renegade                                                               | Chan-Zuckerberg Biohub                                                                            | CZB Cliahub Consortium                                                                                                |
| EPI_ISL_739660, EPI_ISL_739661                                                                                                                                                                                                                                                                                                                                                                                                                                                                                                                                                                                                                                                                                                                                                                                                                                                                                                                                                                                                                                                                                                                                                                                                                                                                                                                                                                                                                                                                                                                                                                                                                                                                                                                                                                                                                                                                                                                                                                                                                                                                                                                                                                                                                                                                                                                                                                                                                                                                                                                                                 | Al-Quds Nutrition and Health Research Institute, Al-Quds University    | Al-Quds Nutrition and Health Research Institute, Al-Quds University                               | Nasereddin,A., Ereqat,S., Al-Jawabreh,A., Rishmawi,C.                                                                 |
| EPI_ISL_739694, EPI_ISL_739697, EPI_ISL_739706, EPI_ISL_739707, EPI_ISL_739708, EPI_ISL_739710, EPI_ISL_739719, EPI_ISL_739721, EPI_ISL_739723, EPI_ISL_739730, EPI_ISL_739740, EPI_ISL_739741, EPI_ISL_739742, EPI_ISL_739752, EPI_ISL_739759, EPI_ISL_739763, EPI_ISL_739764, EPI_ISL_739771, EPI_ISL_739772, EPI_ISL_739775, EPI_ISL_739776, EPI_ISL_739779, EPI_ISL_739793, EPI_ISL_739797, EPI_ISL_739801, EPI_ISL_739805, EPI_ISL_739811, EPI_ISL_739821, EPI_ISL_739823, EPI_ISL_739842, EPI_ISL_739846, EPI_ISL_739847, EPI_ISL_739849, EPI_ISL_739857, EPI_ISL_739858, EPI_ISL_739865, EPI_ISL_739872, EPI_ISL_739876, EPI_ISL_739879, EPI_ISL_739885, EPI_ISL_739887, EPI_ISL_739888, EPI_ISL_739890, EPI_ISL_739893, EPI_ISL_739899, EPI_ISL_739901, EPI_ISL_739907, EPI_ISL_739921, EPI_ISL_739928, EPI_ISL_739932, EPI_ISL_739935, EPI_ISL_739938, EPI_ISL_739942, EPI_ISL_739950, EPI_ISL_739960, EPI_ISL_739966, EPI_ISL_739972, EPI_ISL_739979, EPI_ISL_739984, EPI_ISL_739986, EPI_ISL_739989, EPI_ISL_739991, EPI_ISL_740011, EPI_ISL_740012, EPI_ISL_740029, EPI_ISL_740035, EPI_ISL_740059, EPI_ISL_740065, EPI_ISL_740075, EPI_ISL_740083, EPI_ISL_740088, EPI_ISL_740089, EPI_ISL_740094, EPI_ISL_740102, EPI_ISL_740112, EPI_ISL_740119, EPI_ISL_740128, EPI_ISL_740140, EPI_ISL_740143, EPI_ISL_740148, EPI_ISL_740151, EPI_ISL_740152, EPI_ISL_740158, EPI_ISL_740163, EPI_ISL_740164, EPI_ISL_740167, EPI_ISL_740174, EPI_ISL_740177, EPI_ISL_740211, EPI_ISL_740212, EPI_ISL_740213, EPI_ISL_740216, EPI_ISL_740223, EPI_ISL_740228, EPI_ISL_740235, EPI_ISL_740236, EPI_ISL_740241, EPI_ISL_740253, EPI_ISL_740255, EPI_ISL_740257, EPI_ISL_740284, EPI_ISL_740285, EPI_ISL_740297, EPI_ISL_740299, EPI_ISL_740301, EPI_ISL_740303, EPI_ISL_740309, EPI_ISL_740311, EPI_ISL_740312, EPI_ISL_740315, EPI_ISL_740325, EPI_ISL_740335, EPI_ISL_740339, EPI_ISL_740341, EPI_ISL_740350, EPI_ISL_740351, EPI_ISL_740363, EPI_ISL_740367, EPI_ISL_740371, EPI_ISL_740374, EPI_ISL_740376, EPI_ISL_740378, EPI_ISL_740379, EPI_ISL_740380, EPI_ISL_740385, EPI_ISL_740389, EPI_ISL_740392, EPI_ISL_740393, EPI_ISL_740395, EPI_ISL_740400, EPI_ISL_740411, EPI_ISL_740413, EPI_ISL_740416, EPI_ISL_740420, EPI_ISL_740422, EPI_ISL_740426, EPI_ISL_740428, EPI_ISL_740437, EPI_ISL_740446, EPI_ISL_740452, EPI_ISL_740454, EPI_ISL_740458, EPI_ISL_740459, EPI_ISL_740463, EPI_ISL_740472, EPI_ISL_740476, EPI_ISL_740483, EPI_ISL_740484, EPI_ISL_740494, EPI_ISL_740505, EPI_ISL_740517, EPI_ISL_740523, EPI_ISL_740524, EPI_ISL_740529, EPI_ISL_740541 |                                                                        |                                                                                                   |                                                                                                                       |
| see above                                                                                                                                                                                                                                                                                                                                                                                                                                                                                                                                                                                                                                                                                                                                                                                                                                                                                                                                                                                                                                                                                                                                                                                                                                                                                                                                                                                                                                                                                                                                                                                                                                                                                                                                                                                                                                                                                                                                                                                                                                                                                                                                                                                                                                                                                                                                                                                                                                                                                                                                                                      | Laboratoire national de santé, Microbiology, Virology                  | Laboratoire national de santé, Microbiology, Microbial Genomics Platform                          | Anke Wienecke-Baldacchino, Catherine Ragimbeau,Jessica Tapp, Fatu Djabi, Lise Pignon, Raoul Salmon, Tamir Abdelrahman |
| EPI_ISL_740547                                                                                                                                                                                                                                                                                                                                                                                                                                                                                                                                                                                                                                                                                                                                                                                                                                                                                                                                                                                                                                                                                                                                                                                                                                                                                                                                                                                                                                                                                                                                                                                                                                                                                                                                                                                                                                                                                                                                                                                                                                                                                                                                                                                                                                                                                                                                                                                                                                                                                                                                                                 | Department of Laboratory Medicine, National Taiwan University Hospital | Microbial Genomics Core Lab, National Taiwan University Centers of Genomic and Precision Medicine | Shiou-Hwei Yeh, You-Yu Lin, Ya-Yun Lai, Chiao-Ling Li, Shan-Chwen Chang, Pei-Jer Chen, Sui-Yuan Chang                 |



|                                                                                                                                                                                                                                                                                                                                                                                                                                                                                                                                                                                                                                                                                                                                                                                                                                                                                                                                                                                                                                                                                                                                                                                                                                                                                                                                                                                                                                                                                                                                                                                |                                                                                                          |                                                                                                                            |                                                                                                                                                                            |
|--------------------------------------------------------------------------------------------------------------------------------------------------------------------------------------------------------------------------------------------------------------------------------------------------------------------------------------------------------------------------------------------------------------------------------------------------------------------------------------------------------------------------------------------------------------------------------------------------------------------------------------------------------------------------------------------------------------------------------------------------------------------------------------------------------------------------------------------------------------------------------------------------------------------------------------------------------------------------------------------------------------------------------------------------------------------------------------------------------------------------------------------------------------------------------------------------------------------------------------------------------------------------------------------------------------------------------------------------------------------------------------------------------------------------------------------------------------------------------------------------------------------------------------------------------------------------------|----------------------------------------------------------------------------------------------------------|----------------------------------------------------------------------------------------------------------------------------|----------------------------------------------------------------------------------------------------------------------------------------------------------------------------|
| EPI_ISL_747711, EPI_ISL_747712, EPI_ISL_747713, EPI_ISL_747714, EPI_ISL_747716, EPI_ISL_747717, EPI_ISL_747718, EPI_ISL_747719, EPI_ISL_747720, EPI_ISL_748021, EPI_ISL_748022, EPI_ISL_748023, EPI_ISL_748025, EPI_ISL_748026, EPI_ISL_748027, EPI_ISL_748028, EPI_ISL_748030, EPI_ISL_748031, EPI_ISL_748032, EPI_ISL_748034, EPI_ISL_748035, EPI_ISL_748036, EPI_ISL_748037, EPI_ISL_748038, EPI_ISL_748039, EPI_ISL_748040, EPI_ISL_748041, EPI_ISL_748042, EPI_ISL_748043, EPI_ISL_748044, EPI_ISL_748045, EPI_ISL_748046, EPI_ISL_748047, EPI_ISL_748048, EPI_ISL_748049, EPI_ISL_748050, EPI_ISL_748051, EPI_ISL_748052, EPI_ISL_748054, EPI_ISL_748055, EPI_ISL_748056, EPI_ISL_748057, EPI_ISL_748058, EPI_ISL_748059, EPI_ISL_748060, EPI_ISL_748061, EPI_ISL_748062, EPI_ISL_748063, EPI_ISL_748064, EPI_ISL_748065, EPI_ISL_748066, EPI_ISL_748068, EPI_ISL_748070, EPI_ISL_748071, EPI_ISL_748072, EPI_ISL_748073, EPI_ISL_748074, EPI_ISL_748075, EPI_ISL_748076, EPI_ISL_748077, EPI_ISL_748078, EPI_ISL_748079, EPI_ISL_748080, EPI_ISL_748081, EPI_ISL_748082, EPI_ISL_748083, EPI_ISL_748084, EPI_ISL_748085, EPI_ISL_748086, EPI_ISL_748087, EPI_ISL_748088, EPI_ISL_748089, EPI_ISL_748090, EPI_ISL_748092, EPI_ISL_748094, EPI_ISL_748095, EPI_ISL_748096, EPI_ISL_748097, EPI_ISL_748099, EPI_ISL_748100, EPI_ISL_748101, EPI_ISL_748102, EPI_ISL_748103, EPI_ISL_748104, EPI_ISL_748105, EPI_ISL_748107, EPI_ISL_748108, EPI_ISL_748109, EPI_ISL_748110, EPI_ISL_748112, EPI_ISL_748113, EPI_ISL_748114, EPI_ISL_748115, EPI_ISL_748116, EPI_ISL_748117 |                                                                                                          |                                                                                                                            |                                                                                                                                                                            |
| see above                                                                                                                                                                                                                                                                                                                                                                                                                                                                                                                                                                                                                                                                                                                                                                                                                                                                                                                                                                                                                                                                                                                                                                                                                                                                                                                                                                                                                                                                                                                                                                      | Department of Virus and Microbiological Special Diagnostics, Statens Serum Institut, Copenhagen, Denmark | Albertsen Lab, Department of Chemistry and Bioscience, Aalborg University, Denmark                                         | Danish Covid-19 Genome Consortium                                                                                                                                          |
| EPI_ISL_751454, EPI_ISL_751455, EPI_ISL_751456, EPI_ISL_751457, EPI_ISL_751458, EPI_ISL_751460, EPI_ISL_751463, EPI_ISL_751464, EPI_ISL_751465, EPI_ISL_751472, EPI_ISL_751473, EPI_ISL_751474, EPI_ISL_751475, EPI_ISL_751476                                                                                                                                                                                                                                                                                                                                                                                                                                                                                                                                                                                                                                                                                                                                                                                                                                                                                                                                                                                                                                                                                                                                                                                                                                                                                                                                                 |                                                                                                          |                                                                                                                            |                                                                                                                                                                            |
| see above                                                                                                                                                                                                                                                                                                                                                                                                                                                                                                                                                                                                                                                                                                                                                                                                                                                                                                                                                                                                                                                                                                                                                                                                                                                                                                                                                                                                                                                                                                                                                                      | CHU Purpan - Laboratoire de Virologie - Institut Fédératif de Biologie                                   | CHU Purpan - Laboratoire de Virologie - Institut Fédératif de Biologie                                                     | Latour J., Ranger N., Dubois M., Carcenac R., Harter A., Boyer P., Tremeaux P., Izopet J.                                                                                  |
| EPI_ISL_751558                                                                                                                                                                                                                                                                                                                                                                                                                                                                                                                                                                                                                                                                                                                                                                                                                                                                                                                                                                                                                                                                                                                                                                                                                                                                                                                                                                                                                                                                                                                                                                 | NH Dept. of Health and Human Services Public Health Labs                                                 | Genomics and Discovery, Respiratory Viruses Branch, Division of Viral Diseases, Centers for Disease Control and Prevention | Krista Queen, Yan Li, Ying Tao, Jing Zhang, Anna Uehara, Anna Montmayeur, Clinton R. Paden, Peter W. Cook,Rachel Marine, Mili Sheth, Haibin Wang, Justin Lee, Suxiang Tong |
| EPI_ISL_751565                                                                                                                                                                                                                                                                                                                                                                                                                                                                                                                                                                                                                                                                                                                                                                                                                                                                                                                                                                                                                                                                                                                                                                                                                                                                                                                                                                                                                                                                                                                                                                 | IA State Hygienic Laboratory                                                                             | Genomics and Discovery, Respiratory Viruses Branch, Division of Viral Diseases, Centers for Disease Control and Prevention | Krista Queen, Yan Li, Ying Tao, Jing Zhang, Anna Uehara, Anna Montmayeur, Clinton R. Paden, Peter W. Cook,Rachel Marine, Mili Sheth, Haibin Wang, Justin Lee, Suxiang Tong |
| EPI_ISL_751576                                                                                                                                                                                                                                                                                                                                                                                                                                                                                                                                                                                                                                                                                                                                                                                                                                                                                                                                                                                                                                                                                                                                                                                                                                                                                                                                                                                                                                                                                                                                                                 | MN PHL Division, Minnesota Department of Health                                                          | Genomics and Discovery, Respiratory Viruses Branch, Division of Viral Diseases, Centers for Disease Control and Prevention | Krista Queen, Yan Li, Ying Tao, Jing Zhang, Anna Uehara, Anna Montmayeur, Clinton R. Paden, Peter W. Cook,Rachel Marine, Mili Sheth, Haibin Wang, Justin Lee, Suxiang Tong |
| EPI_ISL_751577                                                                                                                                                                                                                                                                                                                                                                                                                                                                                                                                                                                                                                                                                                                                                                                                                                                                                                                                                                                                                                                                                                                                                                                                                                                                                                                                                                                                                                                                                                                                                                 | MD DOH Laboratories Administration                                                                       | Genomics and Discovery, Respiratory Viruses Branch, Division of Viral Diseases, Centers for Disease Control and Prevention | Krista Queen, Yan Li, Ying Tao, Jing Zhang, Anna Uehara, Anna Montmayeur, Clinton R. Paden, Peter W. Cook,Rachel Marine, Mili Sheth, Haibin Wang, Justin Lee, Suxiang Tong |
| EPI_ISL_751578                                                                                                                                                                                                                                                                                                                                                                                                                                                                                                                                                                                                                                                                                                                                                                                                                                                                                                                                                                                                                                                                                                                                                                                                                                                                                                                                                                                                                                                                                                                                                                 | HI Dept. of Health, State Laboratories Division                                                          | Genomics and Discovery, Respiratory Viruses Branch, Division of Viral Diseases, Centers for Disease Control and Prevention | Krista Queen, Yan Li, Ying Tao, Jing Zhang, Anna Uehara, Anna Montmayeur, Clinton R. Paden, Peter W. Cook,Rachel Marine, Mili Sheth, Haibin Wang, Justin Lee, Suxiang Tong |
| EPI_ISL_751581                                                                                                                                                                                                                                                                                                                                                                                                                                                                                                                                                                                                                                                                                                                                                                                                                                                                                                                                                                                                                                                                                                                                                                                                                                                                                                                                                                                                                                                                                                                                                                 | NYSDOH Wadsworth Center, Virology Lab                                                                    | Genomics and Discovery, Respiratory Viruses Branch, Division of Viral Diseases, Centers for Disease Control and Prevention | Krista Queen, Yan Li, Ying Tao, Jing Zhang, Anna Uehara, Anna Montmayeur, Clinton R. Paden, Peter W. Cook,Rachel Marine, Mili Sheth, Haibin Wang, Justin Lee, Suxiang Tong |
| EPI_ISL_751585                                                                                                                                                                                                                                                                                                                                                                                                                                                                                                                                                                                                                                                                                                                                                                                                                                                                                                                                                                                                                                                                                                                                                                                                                                                                                                                                                                                                                                                                                                                                                                 | NE Public Health Laboratory                                                                              | Genomics and Discovery, Respiratory Viruses Branch, Division of Viral Diseases, Centers for Disease Control and Prevention | Krista Queen, Yan Li, Ying Tao, Jing Zhang, Anna Uehara, Anna Montmayeur, Clinton R. Paden, Peter W. Cook,Rachel Marine, Mili Sheth, Haibin Wang, Justin Lee, Suxiang Tong |
| EPI_ISL_751598                                                                                                                                                                                                                                                                                                                                                                                                                                                                                                                                                                                                                                                                                                                                                                                                                                                                                                                                                                                                                                                                                                                                                                                                                                                                                                                                                                                                                                                                                                                                                                 | AK State Public Health Lab, State Health Department                                                      | Genomics and Discovery, Respiratory Viruses Branch, Division of Viral Diseases, Centers for Disease Control and Prevention | Krista Queen, Yan Li, Ying Tao, Jing Zhang, Anna Uehara, Anna Montmayeur, Clinton R. Paden, Peter W. Cook,Rachel Marine, Mili Sheth, Haibin Wang, Justin Lee, Suxiang Tong |
| EPI_ISL_751602                                                                                                                                                                                                                                                                                                                                                                                                                                                                                                                                                                                                                                                                                                                                                                                                                                                                                                                                                                                                                                                                                                                                                                                                                                                                                                                                                                                                                                                                                                                                                                 | DE Public Health Laboratory                                                                              | Genomics and Discovery, Respiratory Viruses Branch, Division of Viral Diseases, Centers for Disease Control and Prevention | Krista Queen, Yan Li, Ying Tao, Jing Zhang, Anna Uehara, Anna Montmayeur, Clinton R. Paden, Peter W. Cook,Rachel Marine, Mili Sheth, Haibin Wang, Justin Lee, Suxiang Tong |
| EPI_ISL_751606, EPI_ISL_751607                                                                                                                                                                                                                                                                                                                                                                                                                                                                                                                                                                                                                                                                                                                                                                                                                                                                                                                                                                                                                                                                                                                                                                                                                                                                                                                                                                                                                                                                                                                                                 | MD DOH Laboratories Administration                                                                       | Genomics and Discovery, Respiratory Viruses Branch, Division of Viral Diseases, Centers for Disease Control and Prevention | Krista Queen, Yan Li, Ying Tao, Jing Zhang, Anna Uehara, Anna Montmayeur, Clinton R. Paden, Peter W. Cook,Rachel Marine, Mili Sheth, Haibin Wang, Justin Lee, Suxiang Tong |
| EPI_ISL_751613                                                                                                                                                                                                                                                                                                                                                                                                                                                                                                                                                                                                                                                                                                                                                                                                                                                                                                                                                                                                                                                                                                                                                                                                                                                                                                                                                                                                                                                                                                                                                                 | OH Department of Health Laboratory                                                                       | Genomics and Discovery, Respiratory Viruses Branch, Division of Viral Diseases, Centers for Disease Control and Prevention | Krista Queen, Yan Li, Ying Tao, Jing Zhang, Anna Uehara, Anna Montmayeur, Clinton R. Paden, Peter W. Cook,Rachel Marine, Mili Sheth, Haibin Wang, Justin Lee, Suxiang Tong |
| EPI_ISL_751614, EPI_ISL_751618                                                                                                                                                                                                                                                                                                                                                                                                                                                                                                                                                                                                                                                                                                                                                                                                                                                                                                                                                                                                                                                                                                                                                                                                                                                                                                                                                                                                                                                                                                                                                 | ID Bureau of Laboratories                                                                                | Genomics and Discovery, Respiratory Viruses Branch, Division of Viral Diseases, Centers for Disease Control and Prevention | Krista Queen, Yan Li, Ying Tao, Jing Zhang, Anna Uehara, Anna Montmayeur, Clinton R. Paden, Peter W. Cook,Rachel Marine, Mili Sheth, Haibin Wang, Justin Lee, Suxiang Tong |
| EPI_ISL_751638                                                                                                                                                                                                                                                                                                                                                                                                                                                                                                                                                                                                                                                                                                                                                                                                                                                                                                                                                                                                                                                                                                                                                                                                                                                                                                                                                                                                                                                                                                                                                                 | NE Public Health Laboratory                                                                              | Genomics and Discovery, Respiratory Viruses Branch, Division of Viral Diseases, Centers for Disease Control and Prevention | Krista Queen, Yan Li, Ying Tao, Jing Zhang, Anna Uehara, Anna Montmayeur, Clinton R. Paden, Peter W. Cook,Rachel Marine, Mili Sheth, Haibin Wang, Justin Lee, Suxiang Tong |
| EPI_ISL_751641                                                                                                                                                                                                                                                                                                                                                                                                                                                                                                                                                                                                                                                                                                                                                                                                                                                                                                                                                                                                                                                                                                                                                                                                                                                                                                                                                                                                                                                                                                                                                                 | MN PHL Division, Minnesota Department of Health                                                          | Genomics and Discovery, Respiratory Viruses Branch, Division of Viral Diseases, Centers for Disease Control and Prevention | Krista Queen, Yan Li, Ying Tao, Jing Zhang, Anna Uehara, Anna Montmayeur, Clinton R. Paden, Peter W. Cook,Rachel Marine, Mili Sheth, Haibin Wang, Justin Lee, Suxiang Tong |
| EPI_ISL_751649, EPI_ISL_751650                                                                                                                                                                                                                                                                                                                                                                                                                                                                                                                                                                                                                                                                                                                                                                                                                                                                                                                                                                                                                                                                                                                                                                                                                                                                                                                                                                                                                                                                                                                                                 | CT-Dr. Katherine A. Kelley State Public Health Lab                                                       | Genomics and Discovery, Respiratory Viruses Branch, Division of Viral Diseases, Centers for Disease Control and Prevention | Krista Queen, Yan Li, Ying Tao, Jing Zhang, Anna Uehara, Anna Montmayeur, Clinton R. Paden, Peter W. Cook,Rachel Marine, Mili Sheth, Haibin Wang, Justin Lee, Suxiang Tong |
| EPI_ISL_751656                                                                                                                                                                                                                                                                                                                                                                                                                                                                                                                                                                                                                                                                                                                                                                                                                                                                                                                                                                                                                                                                                                                                                                                                                                                                                                                                                                                                                                                                                                                                                                 | MO State Public Health Laboratory                                                                        | Genomics and Discovery, Respiratory Viruses Branch, Division of Viral Diseases, Centers for Disease Control and Prevention | Krista Queen, Yan Li, Ying Tao, Jing Zhang, Anna Uehara, Anna Montmayeur, Clinton R. Paden, Peter W. Cook,Rachel Marine, Mili Sheth, Haibin Wang, Justin Lee, Suxiang Tong |
| EPI_ISL_751659                                                                                                                                                                                                                                                                                                                                                                                                                                                                                                                                                                                                                                                                                                                                                                                                                                                                                                                                                                                                                                                                                                                                                                                                                                                                                                                                                                                                                                                                                                                                                                 | NJ Public Health and Environmental Laboratories                                                          | Genomics and Discovery, Respiratory Viruses Branch, Division of Viral Diseases, Centers for Disease Control and Prevention | Krista Queen, Yan Li, Ying Tao, Jing Zhang, Anna Uehara, Anna Montmayeur, Clinton R. Paden, Peter W. Cook,Rachel Marine, Mili Sheth, Haibin Wang, Justin Lee, Suxiang Tong |
| EPI_ISL_751661                                                                                                                                                                                                                                                                                                                                                                                                                                                                                                                                                                                                                                                                                                                                                                                                                                                                                                                                                                                                                                                                                                                                                                                                                                                                                                                                                                                                                                                                                                                                                                 | MS Public Health Laboratory                                                                              | Genomics and Discovery, Respiratory Viruses Branch, Division of Viral Diseases, Centers for Disease Control and Prevention | Krista Queen, Yan Li, Ying Tao, Jing Zhang, Anna Uehara, Anna Montmayeur, Clinton R. Paden, Peter W. Cook,Rachel Marine, Mili Sheth, Haibin Wang, Justin Lee, Suxiang Tong |
| EPI_ISL_751666                                                                                                                                                                                                                                                                                                                                                                                                                                                                                                                                                                                                                                                                                                                                                                                                                                                                                                                                                                                                                                                                                                                                                                                                                                                                                                                                                                                                                                                                                                                                                                 | IA State Hygienic Laboratory                                                                             | Genomics and Discovery, Respiratory Viruses Branch, Division of Viral Diseases, Centers for Disease Control and Prevention | Krista Queen, Yan Li, Ying Tao, Jing Zhang, Anna Uehara, Anna Montmayeur, Clinton R. Paden, Peter W. Cook,Rachel Marine, Mili Sheth, Haibin Wang, Justin Lee, Suxiang Tong |
| EPI_ISL_751683                                                                                                                                                                                                                                                                                                                                                                                                                                                                                                                                                                                                                                                                                                                                                                                                                                                                                                                                                                                                                                                                                                                                                                                                                                                                                                                                                                                                                                                                                                                                                                 | MS Public Health Laboratory                                                                              | Genomics and Discovery, Respiratory Viruses Branch, Division of Viral Diseases, Centers for Disease Control and Prevention | Krista Queen, Yan Li, Ying Tao, Jing Zhang, Anna Uehara, Anna Montmayeur, Clinton R. Paden, Peter W. Cook,Rachel Marine, Mili Sheth, Haibin Wang, Justin Lee, Suxiang Tong |
| EPI_ISL_751689                                                                                                                                                                                                                                                                                                                                                                                                                                                                                                                                                                                                                                                                                                                                                                                                                                                                                                                                                                                                                                                                                                                                                                                                                                                                                                                                                                                                                                                                                                                                                                 | OR State PHL-Virology/Immunology Section                                                                 | Genomics and Discovery, Respiratory Viruses Branch, Division of Viral Diseases, Centers for Disease Control and Prevention | Krista Queen, Yan Li, Ying Tao, Jing Zhang, Anna Uehara, Anna Montmayeur, Clinton R. Paden, Peter W. Cook,Rachel Marine, Mili Sheth, Haibin Wang, Justin Lee, Suxiang Tong |
| EPI_ISL_751694                                                                                                                                                                                                                                                                                                                                                                                                                                                                                                                                                                                                                                                                                                                                                                                                                                                                                                                                                                                                                                                                                                                                                                                                                                                                                                                                                                                                                                                                                                                                                                 | AK State Public Health Lab, State Health Department                                                      | Genomics and Discovery, Respiratory Viruses Branch,                                                                        | Krista Queen, Yan Li, Ying Tao, Jing Zhang, Anna Uehara, Anna Montmayeur, Clinton R. Paden, Peter W. Cook,Rachel Marine, Mili Sheth, Haibin Wang,                          |

|                                                                                                                                                                                                                                                                                                                                                                                                                                                                                                                                                                                                                                                                                                                                |                                                                                             |                                                                                                                            |                                                                                                                                                                                |
|--------------------------------------------------------------------------------------------------------------------------------------------------------------------------------------------------------------------------------------------------------------------------------------------------------------------------------------------------------------------------------------------------------------------------------------------------------------------------------------------------------------------------------------------------------------------------------------------------------------------------------------------------------------------------------------------------------------------------------|---------------------------------------------------------------------------------------------|----------------------------------------------------------------------------------------------------------------------------|--------------------------------------------------------------------------------------------------------------------------------------------------------------------------------|
|                                                                                                                                                                                                                                                                                                                                                                                                                                                                                                                                                                                                                                                                                                                                |                                                                                             | Division of Viral Diseases, Centers for Disease Control and Prevention                                                     | Justin Lee, Suxiang Tong                                                                                                                                                       |
| EPI_ISL_751715                                                                                                                                                                                                                                                                                                                                                                                                                                                                                                                                                                                                                                                                                                                 | MO State Public Health Laboratory                                                           | Genomics and Discovery, Respiratory Viruses Branch, Division of Viral Diseases, Centers for Disease Control and Prevention | Krista Queen, Yan Li, Ying Tao, Jing Zhang, Anna Uehara, Anna Montmayeur, Clinton R. Paden, Peter W. Cook,Rachel Marine, Mili Sheth, Haibin Wang, Justin Lee, Suxiang Tong     |
| EPI_ISL_751716                                                                                                                                                                                                                                                                                                                                                                                                                                                                                                                                                                                                                                                                                                                 | MN PHL Division, Minnesota Department of Health                                             | Genomics and Discovery, Respiratory Viruses Branch, Division of Viral Diseases, Centers for Disease Control and Prevention | Krista Queen, Yan Li, Ying Tao, Jing Zhang, Anna Uehara, Anna Montmayeur, Clinton R. Paden, Peter W. Cook,Rachel Marine, Mili Sheth, Haibin Wang, Justin Lee, Suxiang Tong     |
| EPI_ISL_751729                                                                                                                                                                                                                                                                                                                                                                                                                                                                                                                                                                                                                                                                                                                 | CT-Dr. Katherine A. Kelley State Public Health Lab                                          | Genomics and Discovery, Respiratory Viruses Branch, Division of Viral Diseases, Centers for Disease Control and Prevention | Krista Queen, Yan Li, Ying Tao, Jing Zhang, Anna Uehara, Anna Montmayeur, Clinton R. Paden, Peter W. Cook,Rachel Marine, Mili Sheth, Haibin Wang, Justin Lee, Suxiang Tong     |
| EPI_ISL_751733                                                                                                                                                                                                                                                                                                                                                                                                                                                                                                                                                                                                                                                                                                                 | MN PHL Division, Minnesota Department of Health                                             | Genomics and Discovery, Respiratory Viruses Branch, Division of Viral Diseases, Centers for Disease Control and Prevention | Krista Queen, Yan Li, Ying Tao, Jing Zhang, Anna Uehara, Anna Montmayeur, Clinton R. Paden, Peter W. Cook,Rachel Marine, Mili Sheth, Haibin Wang, Justin Lee, Suxiang Tong     |
| EPI_ISL_751734                                                                                                                                                                                                                                                                                                                                                                                                                                                                                                                                                                                                                                                                                                                 | NE Public Health Laboratory                                                                 | Genomics and Discovery, Respiratory Viruses Branch, Division of Viral Diseases, Centers for Disease Control and Prevention | Krista Queen, Yan Li, Ying Tao, Jing Zhang, Anna Uehara, Anna Montmayeur, Clinton R. Paden, Peter W. Cook,Rachel Marine, Mili Sheth, Haibin Wang, Justin Lee, Suxiang Tong     |
| EPI_ISL_751739                                                                                                                                                                                                                                                                                                                                                                                                                                                                                                                                                                                                                                                                                                                 | MN PHL Division, Minnesota Department of Health                                             | Genomics and Discovery, Respiratory Viruses Branch, Division of Viral Diseases, Centers for Disease Control and Prevention | Krista Queen, Yan Li, Ying Tao, Jing Zhang, Anna Uehara, Anna Montmayeur, Clinton R. Paden, Peter W. Cook,Rachel Marine, Mili Sheth, Haibin Wang, Justin Lee, Suxiang Tong     |
| EPI_ISL_751741                                                                                                                                                                                                                                                                                                                                                                                                                                                                                                                                                                                                                                                                                                                 | OH Department of Health Laboratory                                                          | Genomics and Discovery, Respiratory Viruses Branch, Division of Viral Diseases, Centers for Disease Control and Prevention | Krista Queen, Yan Li, Ying Tao, Jing Zhang, Anna Uehara, Anna Montmayeur, Clinton R. Paden, Peter W. Cook,Rachel Marine, Mili Sheth, Haibin Wang, Justin Lee, Suxiang Tong     |
| EPI_ISL_751742                                                                                                                                                                                                                                                                                                                                                                                                                                                                                                                                                                                                                                                                                                                 | IA State Hygienic Laboratory                                                                | Genomics and Discovery, Respiratory Viruses Branch, Division of Viral Diseases, Centers for Disease Control and Prevention | Krista Queen, Yan Li, Ying Tao, Jing Zhang, Anna Uehara, Anna Montmayeur, Clinton R. Paden, Peter W. Cook,Rachel Marine, Mili Sheth, Haibin Wang, Justin Lee, Suxiang Tong     |
| EPI_ISL_751748                                                                                                                                                                                                                                                                                                                                                                                                                                                                                                                                                                                                                                                                                                                 | ID Bureau of Laboratories                                                                   | Genomics and Discovery, Respiratory Viruses Branch, Division of Viral Diseases, Centers for Disease Control and Prevention | Krista Queen, Yan Li, Ying Tao, Jing Zhang, Anna Uehara, Anna Montmayeur, Clinton R. Paden, Peter W. Cook,Rachel Marine, Mili Sheth, Haibin Wang, Justin Lee, Suxiang Tong     |
| EPI_ISL_751752                                                                                                                                                                                                                                                                                                                                                                                                                                                                                                                                                                                                                                                                                                                 | LA Office of Public Health Laboratories                                                     | Genomics and Discovery, Respiratory Viruses Branch, Division of Viral Diseases, Centers for Disease Control and Prevention | Krista Queen, Yan Li, Ying Tao, Jing Zhang, Anna Uehara, Anna Montmayeur, Clinton R. Paden, Peter W. Cook,Rachel Marine, Mili Sheth, Haibin Wang, Justin Lee, Suxiang Tong     |
| EPI_ISL_751758, EPI_ISL_751767                                                                                                                                                                                                                                                                                                                                                                                                                                                                                                                                                                                                                                                                                                 | HI Dept. of Health, State Laboratories Division                                             | Genomics and Discovery, Respiratory Viruses Branch, Division of Viral Diseases, Centers for Disease Control and Prevention | Krista Queen, Yan Li, Ying Tao, Jing Zhang, Anna Uehara, Anna Montmayeur, Clinton R. Paden, Peter W. Cook,Rachel Marine, Mili Sheth, Haibin Wang, Justin Lee, Suxiang Tong     |
| EPI_ISL_751779                                                                                                                                                                                                                                                                                                                                                                                                                                                                                                                                                                                                                                                                                                                 | IA State Hygienic Laboratory                                                                | Genomics and Discovery, Respiratory Viruses Branch, Division of Viral Diseases, Centers for Disease Control and Prevention | Krista Queen, Yan Li, Ying Tao, Jing Zhang, Anna Uehara, Anna Montmayeur, Clinton R. Paden, Peter W. Cook,Rachel Marine, Mili Sheth, Haibin Wang, Justin Lee, Suxiang Tong     |
| EPI_ISL_751784                                                                                                                                                                                                                                                                                                                                                                                                                                                                                                                                                                                                                                                                                                                 | VA-Division of Consolidated Laboratory Services                                             | Genomics and Discovery, Respiratory Viruses Branch, Division of Viral Diseases, Centers for Disease Control and Prevention | Krista Queen, Yan Li, Ying Tao, Jing Zhang, Anna Uehara, Anna Montmayeur, Clinton R. Paden, Peter W. Cook,Rachel Marine, Mili Sheth, Haibin Wang, Justin Lee, Suxiang Tong     |
| EPI_ISL_751787                                                                                                                                                                                                                                                                                                                                                                                                                                                                                                                                                                                                                                                                                                                 | TX DSHS, Lab Services Section MC 1947                                                       | Genomics and Discovery, Respiratory Viruses Branch, Division of Viral Diseases, Centers for Disease Control and Prevention | Krista Queen, Yan Li, Ying Tao, Jing Zhang, Anna Uehara, Anna Montmayeur, Clinton R. Paden, Peter W. Cook,Rachel Marine, Mili Sheth, Haibin Wang, Justin Lee, Suxiang Tong     |
| EPI_ISL_751793                                                                                                                                                                                                                                                                                                                                                                                                                                                                                                                                                                                                                                                                                                                 | AK State Public Health Lab, State Health Department                                         | Genomics and Discovery, Respiratory Viruses Branch, Division of Viral Diseases, Centers for Disease Control and Prevention | Krista Queen, Yan Li, Ying Tao, Jing Zhang, Anna Uehara, Anna Montmayeur, Clinton R. Paden, Peter W. Cook,Rachel Marine, Mili Sheth, Haibin Wang, Justin Lee, Suxiang Tong     |
| EPI_ISL_752531, EPI_ISL_752532, EPI_ISL_752533, EPI_ISL_752535, EPI_ISL_752538, EPI_ISL_752539, EPI_ISL_752540, EPI_ISL_752541, EPI_ISL_752542, EPI_ISL_752546, EPI_ISL_752547, EPI_ISL_752548, EPI_ISL_752549, EPI_ISL_752550, EPI_ISL_752551, EPI_ISL_752553, EPI_ISL_752554, EPI_ISL_752555                                                                                                                                                                                                                                                                                                                                                                                                                                 |                                                                                             |                                                                                                                            |                                                                                                                                                                                |
| see above                                                                                                                                                                                                                                                                                                                                                                                                                                                                                                                                                                                                                                                                                                                      | National Virus Reference Laboratory                                                         | National Virus Reference Laboratory                                                                                        | Michael Carr, Gabriel Gonzalez, Jonathan Dean, Daniel Hare, Cillian F De Gascun                                                                                                |
| EPI_ISL_752605                                                                                                                                                                                                                                                                                                                                                                                                                                                                                                                                                                                                                                                                                                                 | Faculty of Medicine, Al-Quds University                                                     | Faculty of Medicine, Al-Quds University                                                                                    | Ereqat,S., Nasereddin,A. and Al-Jawabreh,A.                                                                                                                                    |
| EPI_ISL_753114, EPI_ISL_753116, EPI_ISL_753117, EPI_ISL_753118, EPI_ISL_753119, EPI_ISL_753120, EPI_ISL_753129, EPI_ISL_753130, EPI_ISL_753131, EPI_ISL_753132, EPI_ISL_753133, EPI_ISL_753134, EPI_ISL_753135, EPI_ISL_753136, EPI_ISL_753137, EPI_ISL_753138, EPI_ISL_753139, EPI_ISL_753140, EPI_ISL_753141, EPI_ISL_753142, EPI_ISL_753143, EPI_ISL_753144, EPI_ISL_753145, EPI_ISL_753146, EPI_ISL_753154, EPI_ISL_753156, EPI_ISL_753157, EPI_ISL_753158, EPI_ISL_753160, EPI_ISL_753161, EPI_ISL_753163, EPI_ISL_753164, EPI_ISL_753165, EPI_ISL_753166, EPI_ISL_753167, EPI_ISL_753170, EPI_ISL_753171, EPI_ISL_753173, EPI_ISL_753174, EPI_ISL_753176, EPI_ISL_753177, EPI_ISL_753198, EPI_ISL_753200, EPI_ISL_753222 |                                                                                             |                                                                                                                            |                                                                                                                                                                                |
| see above                                                                                                                                                                                                                                                                                                                                                                                                                                                                                                                                                                                                                                                                                                                      | State Laboratories Division, Hawaii State Department of Health                              | State Laboratories Division, Hawaii State Department of Health                                                             | Pamela O'Brien, Sabrina Diemert, Drew Kuwazaki, Razvan Sultana, Edward Desmond                                                                                                 |
| EPI_ISL_753494, EPI_ISL_753526, EPI_ISL_753541, EPI_ISL_753542, EPI_ISL_753543, EPI_ISL_753544, EPI_ISL_753545, EPI_ISL_753546, EPI_ISL_753547, EPI_ISL_753548, EPI_ISL_753549, EPI_ISL_753550, EPI_ISL_753551, EPI_ISL_753552, EPI_ISL_753553, EPI_ISL_753554, EPI_ISL_753555, EPI_ISL_753556, EPI_ISL_753557, EPI_ISL_753558, EPI_ISL_753564, EPI_ISL_753627, EPI_ISL_753634, EPI_ISL_753643, EPI_ISL_753644, EPI_ISL_753645, EPI_ISL_753646, EPI_ISL_753647, EPI_ISL_753648, EPI_ISL_753649, EPI_ISL_753650, EPI_ISL_753651, EPI_ISL_753652                                                                                                                                                                                 |                                                                                             |                                                                                                                            |                                                                                                                                                                                |
| see above                                                                                                                                                                                                                                                                                                                                                                                                                                                                                                                                                                                                                                                                                                                      | Clinical virology Laboratory, Children's Hospital Los Angeles                               | Center for Personalized Medicine, Children's Hospital Los Angeles                                                          | Gai et al                                                                                                                                                                      |
| EPI_ISL_753827, EPI_ISL_753830, EPI_ISL_753831, EPI_ISL_753833                                                                                                                                                                                                                                                                                                                                                                                                                                                                                                                                                                                                                                                                 | Charité Universitätsmedizin Berlin, Institut für Virologie/Labor Berlin                     | Charité Universitätsmedizin Berlin, Institut für Virologie Berlin                                                          | Victor M Corman, Jörn Beheim-Schwarzbach, Barbara Mühlemann, Julia Schneider, Talitha Veith, Terry Jones, Christian Drosten                                                    |
| EPI_ISL_754141, EPI_ISL_754143, EPI_ISL_754144, EPI_ISL_754145, EPI_ISL_754152, EPI_ISL_754153, EPI_ISL_754154, EPI_ISL_754155, EPI_ISL_754156, EPI_ISL_754157, EPI_ISL_754161, EPI_ISL_754162                                                                                                                                                                                                                                                                                                                                                                                                                                                                                                                                 |                                                                                             |                                                                                                                            |                                                                                                                                                                                |
| see above                                                                                                                                                                                                                                                                                                                                                                                                                                                                                                                                                                                                                                                                                                                      | Laboratoire de Microbiologie                                                                | National Reference Center for Viruses of Respiratory Infections, Institut Pasteur, Paris                                   | Marion Barbet, Sylvie Behillil, Méline Bizard, Angela Brisebarre, Camille Capel, Etienne Simon-Lorière, Vincent Enout, Maud Vanpeene, Sylvie van der Werf, Marie-Sarah Fangous |
| EPI_ISL_754173                                                                                                                                                                                                                                                                                                                                                                                                                                                                                                                                                                                                                                                                                                                 | Specialized Lab for COVID-19 Detection, Department of Genetic Engineering and Biotechnology | Specialized Lab for COVID-19 Detection, Department of Genetic Engineering and Biotechnology                                | Md. Nazmul Hasan, Shamsul H. Prodhan, Hammadul Hoque , Nurnabi Azad Jewel, Mumtahn Ahammed, Mahedi Hasan Ridoy, Avishek Sarkar                                                 |
| EPI_ISL_754176                                                                                                                                                                                                                                                                                                                                                                                                                                                                                                                                                                                                                                                                                                                 | Specialized Lab for COVID-19 Detection, Department of Genetic Engineering and Biotechnology | Specialized Lab for COVID-19 Detection, Department of Genetic Engineering and Biotechnology                                | Shamsul H. Prodhan, Hammadul Hoque, Nurnabi Azad Jewel, Md. Nazmul Hasan, Md. Mainul Hossain Bakul, Md. Rabiul Awal                                                            |
| EPI_ISL_754177                                                                                                                                                                                                                                                                                                                                                                                                                                                                                                                                                                                                                                                                                                                 | Specialized Lab for COVID-19 Detection, Department of Genetic Engineering and Biotechnology | Specialized Lab for COVID-19 Detection, Department of Genetic Engineering and Biotechnology                                | Nurnabi Azad Jewel, Md. Nazmul Hasan, Shamsul H. Prodhan, Hammadul Hoque, Asim Debnath, Sudipto Sakib Duranto                                                                  |
| EPI_ISL_754257, EPI_ISL_754287, EPI_ISL_754294, EPI_ISL_754296, EPI_ISL_754297, EPI_ISL_754333,                                                                                                                                                                                                                                                                                                                                                                                                                                                                                                                                                                                                                                | Respiratory Virus Unit, National Infection Service, Public Health England                   | COVID-19 Genomics UK (COG-UK) Consortium                                                                                   | PHE Covid Sequencing Team                                                                                                                                                      |

|                                                                                                                                                                                                                                                                                                                                                                                                                                                                                                                                                                                                                                                                                                                |                                                                                                                                                                                                 |                                                                                                                                        |                                                                                                                                                                                                                                                                                                                                                                                                                                                                    |
|----------------------------------------------------------------------------------------------------------------------------------------------------------------------------------------------------------------------------------------------------------------------------------------------------------------------------------------------------------------------------------------------------------------------------------------------------------------------------------------------------------------------------------------------------------------------------------------------------------------------------------------------------------------------------------------------------------------|-------------------------------------------------------------------------------------------------------------------------------------------------------------------------------------------------|----------------------------------------------------------------------------------------------------------------------------------------|--------------------------------------------------------------------------------------------------------------------------------------------------------------------------------------------------------------------------------------------------------------------------------------------------------------------------------------------------------------------------------------------------------------------------------------------------------------------|
| EPI_ISL_754334, EPI_ISL_754336, EPI_ISL_754354                                                                                                                                                                                                                                                                                                                                                                                                                                                                                                                                                                                                                                                                 |                                                                                                                                                                                                 |                                                                                                                                        |                                                                                                                                                                                                                                                                                                                                                                                                                                                                    |
| EPI_ISL_754402, EPI_ISL_754417, EPI_ISL_754421, EPI_ISL_754477, EPI_ISL_754482, EPI_ISL_754483, EPI_ISL_754488, EPI_ISL_754490, EPI_ISL_754491, EPI_ISL_754493, EPI_ISL_754496, EPI_ISL_754497, EPI_ISL_754499, EPI_ISL_754501, EPI_ISL_754503, EPI_ISL_754506, EPI_ISL_754580, EPI_ISL_754582, EPI_ISL_754583, EPI_ISL_754585, EPI_ISL_754588, EPI_ISL_754589, EPI_ISL_754592, EPI_ISL_754594, EPI_ISL_754595, EPI_ISL_754596, EPI_ISL_754598, EPI_ISL_754605, EPI_ISL_754606, EPI_ISL_754608, EPI_ISL_754610, EPI_ISL_754611, EPI_ISL_754614, EPI_ISL_754618                                                                                                                                                 |                                                                                                                                                                                                 |                                                                                                                                        |                                                                                                                                                                                                                                                                                                                                                                                                                                                                    |
| see above                                                                                                                                                                                                                                                                                                                                                                                                                                                                                                                                                                                                                                                                                                      | Wadsworth Center, New York State Department.of Health                                                                                                                                           | Wadsworth Center, New York State Department.of Health                                                                                  | Kirsten St. George, Daryl M. Lamson, Alexis Russel, Matthew Shudt, Melissa A Leisner, Jonathan Plitnick, Navjot Singh, John Kelly, Sara Griesemer, Erasmus Schneider, Erica Lasek-Nesselquist                                                                                                                                                                                                                                                                      |
| EPI_ISL_755111                                                                                                                                                                                                                                                                                                                                                                                                                                                                                                                                                                                                                                                                                                 | California Department of Public Health                                                                                                                                                          | California Department of Public Health                                                                                                 | CDPH IDLB COVIDNet                                                                                                                                                                                                                                                                                                                                                                                                                                                 |
| EPI_ISL_755216, EPI_ISL_755217, EPI_ISL_755220, EPI_ISL_755224                                                                                                                                                                                                                                                                                                                                                                                                                                                                                                                                                                                                                                                 | UCSD EXCITE lab                                                                                                                                                                                 | Andersen lab at Scripps Research                                                                                                       | SEARCH Alliance San Diego                                                                                                                                                                                                                                                                                                                                                                                                                                          |
| EPI_ISL_755270, EPI_ISL_755271, EPI_ISL_755274, EPI_ISL_755275, EPI_ISL_755278, EPI_ISL_755290, EPI_ISL_755295                                                                                                                                                                                                                                                                                                                                                                                                                                                                                                                                                                                                 | San Diego County Public Health Laboratory                                                                                                                                                       | Andersen lab at Scripps Research                                                                                                       | SEARCH Alliance San Diego with Tracy Basler, Jovan Shephard, Brett Austin                                                                                                                                                                                                                                                                                                                                                                                          |
| EPI_ISL_755434, EPI_ISL_755436, EPI_ISL_755437, EPI_ISL_755439, EPI_ISL_755440, EPI_ISL_755444, EPI_ISL_755446, EPI_ISL_755448, EPI_ISL_755449, EPI_ISL_755450, EPI_ISL_755451, EPI_ISL_755452, EPI_ISL_755457, EPI_ISL_755458, EPI_ISL_755462, EPI_ISL_755463, EPI_ISL_755465, EPI_ISL_755467, EPI_ISL_755469, EPI_ISL_755470, EPI_ISL_755471, EPI_ISL_755473, EPI_ISL_755474, EPI_ISL_755476, EPI_ISL_755477, EPI_ISL_755478, EPI_ISL_755479, EPI_ISL_755480, EPI_ISL_755481, EPI_ISL_755483, EPI_ISL_755484, EPI_ISL_755485, EPI_ISL_755486, EPI_ISL_755488                                                                                                                                                 |                                                                                                                                                                                                 |                                                                                                                                        |                                                                                                                                                                                                                                                                                                                                                                                                                                                                    |
| see above                                                                                                                                                                                                                                                                                                                                                                                                                                                                                                                                                                                                                                                                                                      | Maine Health and Environmental Testing Laboratory                                                                                                                                               | Tewhey Lab, The Jackson Laboratory                                                                                                     | Matluk,N., Dewey,H., Iosue,F., Barter,M., Lynch,R., Munger,H. and Tewhey,R.                                                                                                                                                                                                                                                                                                                                                                                        |
| EPI_ISL_755656, EPI_ISL_755658, EPI_ISL_755661, EPI_ISL_755662, EPI_ISL_755663, EPI_ISL_755664, EPI_ISL_755665, EPI_ISL_755666, EPI_ISL_755667, EPI_ISL_755671, EPI_ISL_755675, EPI_ISL_755678, EPI_ISL_755679, EPI_ISL_755683, EPI_ISL_755684, EPI_ISL_755687, EPI_ISL_755688, EPI_ISL_755689, EPI_ISL_755690, EPI_ISL_755691, EPI_ISL_755693, EPI_ISL_755694, EPI_ISL_755695, EPI_ISL_755699, EPI_ISL_755703, EPI_ISL_755706, EPI_ISL_755707, EPI_ISL_755709, EPI_ISL_755711                                                                                                                                                                                                                                 |                                                                                                                                                                                                 |                                                                                                                                        |                                                                                                                                                                                                                                                                                                                                                                                                                                                                    |
| see above                                                                                                                                                                                                                                                                                                                                                                                                                                                                                                                                                                                                                                                                                                      | Toronto Invasive Bacterial Diseases Network                                                                                                                                                     | McMaster University                                                                                                                    | Allison McGeer, Patryk Aftanas, Hooman Derakhshani, Angel Li, Kuganya Nirmalarajah, Emily Panousis, Ahmed Draia, Jalees Nasir, Michael Surette, Samira Mubareka, Andrew G. McArthur                                                                                                                                                                                                                                                                                |
| EPI_ISL_755714, EPI_ISL_755716, EPI_ISL_755717, EPI_ISL_755718, EPI_ISL_755719, EPI_ISL_755720, EPI_ISL_755721, EPI_ISL_755723, EPI_ISL_755724, EPI_ISL_755726, EPI_ISL_755728, EPI_ISL_755733, EPI_ISL_755735                                                                                                                                                                                                                                                                                                                                                                                                                                                                                                 |                                                                                                                                                                                                 |                                                                                                                                        |                                                                                                                                                                                                                                                                                                                                                                                                                                                                    |
| see above                                                                                                                                                                                                                                                                                                                                                                                                                                                                                                                                                                                                                                                                                                      | Toronto Invasive Bacterial Diseases Network                                                                                                                                                     | McMaster University                                                                                                                    | David Richardson, Allison McGeer, Patryk Aftanas, Hooman Derakhshani, Angel Li, Kuganya Nirmalarajah, Emily Panousis, Ahmed Draia, Jalees Nasir, Michael Surette, Samira Mubareka, Andrew G. McArthur                                                                                                                                                                                                                                                              |
| EPI_ISL_755802, EPI_ISL_755805, EPI_ISL_755806, EPI_ISL_755807                                                                                                                                                                                                                                                                                                                                                                                                                                                                                                                                                                                                                                                 | Toronto Invasive Bacterial Diseases Network                                                                                                                                                     | McMaster University                                                                                                                    | Allison McGeer, Patryk Aftanas, Hooman Derakhshani, Angel Li, Kuganya Nirmalarajah, Emily Panousis, Ahmed Draia, Jalees Nasir, Michael Surette, Samira Mubareka, Andrew G. McArthur                                                                                                                                                                                                                                                                                |
| EPI_ISL_757187, EPI_ISL_757188, EPI_ISL_757190, EPI_ISL_757192, EPI_ISL_757193, EPI_ISL_757196, EPI_ISL_757200, EPI_ISL_757201, EPI_ISL_757202, EPI_ISL_757204, EPI_ISL_757207, EPI_ISL_757208, EPI_ISL_757211, EPI_ISL_757212, EPI_ISL_757213, EPI_ISL_757214, EPI_ISL_757217, EPI_ISL_757218, EPI_ISL_757219, EPI_ISL_757220, EPI_ISL_757223, EPI_ISL_757224, EPI_ISL_757273, EPI_ISL_757274, EPI_ISL_757275, EPI_ISL_757276, EPI_ISL_757278, EPI_ISL_757279, EPI_ISL_757280, EPI_ISL_757281, EPI_ISL_757283, EPI_ISL_757284                                                                                                                                                                                 |                                                                                                                                                                                                 |                                                                                                                                        |                                                                                                                                                                                                                                                                                                                                                                                                                                                                    |
| see above                                                                                                                                                                                                                                                                                                                                                                                                                                                                                                                                                                                                                                                                                                      | Lighthouse Lab in Glasgow                                                                                                                                                                       | Wellcome Sanger Institute for the COVID-19 Genomics UK (COG-UK) Consortium                                                             | Harper VanSteenhouse, Yumi Kasai, David Gray, Carol Clugston, Anna Dominiczak and Alex Alderton, Roberto Amato, Sonia Goncalves, Ewan Harrison, David K. Jackson, Ian Johnston, Dominic Kwiatkowski, Cordelia Langford, John Sillitoe on behalf of the Wellcome Sanger Institute COVID-19 Surveillance Team                                                                                                                                                        |
| EPI_ISL_757296, EPI_ISL_757297, EPI_ISL_757298, EPI_ISL_757299, EPI_ISL_757300, EPI_ISL_757301, EPI_ISL_757302, EPI_ISL_757303, EPI_ISL_757305, EPI_ISL_757306, EPI_ISL_757307, EPI_ISL_757308, EPI_ISL_757309, EPI_ISL_757310, EPI_ISL_757311, EPI_ISL_757312, EPI_ISL_757313, EPI_ISL_757314, EPI_ISL_757315, EPI_ISL_757317, EPI_ISL_757318, EPI_ISL_757319, EPI_ISL_757320, EPI_ISL_757321, EPI_ISL_757322, EPI_ISL_757324, EPI_ISL_757325, EPI_ISL_757326, EPI_ISL_757327, EPI_ISL_757328, EPI_ISL_757329, EPI_ISL_757330, EPI_ISL_757331, EPI_ISL_757332, EPI_ISL_757333, EPI_ISL_757334, EPI_ISL_757335, EPI_ISL_757336, EPI_ISL_757337, EPI_ISL_757338, EPI_ISL_757339, EPI_ISL_757340, EPI_ISL_757341 |                                                                                                                                                                                                 |                                                                                                                                        |                                                                                                                                                                                                                                                                                                                                                                                                                                                                    |
| see above                                                                                                                                                                                                                                                                                                                                                                                                                                                                                                                                                                                                                                                                                                      | Department of Virology and Immunology, University of Helsinki and Helsinki University Hospital, Huslab Finland                                                                                  | Department of Virology, Faculty of Medicine, University of Helsinki, Helsinki, Finland                                                 | Teemu Smura, Ravi Kant, Phuoc Truong, Hussein Alburkat, Hannimari Kallio-Kokko, Jenni Virtanen, Maija Suvanto, Sari Hannula, Harri Kangas, Pekka Ellonen, Olli Vapalahti                                                                                                                                                                                                                                                                                           |
| EPI_ISL_757699                                                                                                                                                                                                                                                                                                                                                                                                                                                                                                                                                                                                                                                                                                 | Department of Virus and Microbiological Special Diagnostics, Statens Serum Institut, Copenhagen, Denmark                                                                                        | Albertsen Lab, Department of Chemistry and Bioscience, Aalborg University, Denmark                                                     | Danish Covid-19 Genome Consortium                                                                                                                                                                                                                                                                                                                                                                                                                                  |
| EPI_ISL_760230, EPI_ISL_760232, EPI_ISL_760233, EPI_ISL_760234, EPI_ISL_760235, EPI_ISL_760236, EPI_ISL_760237, EPI_ISL_760238, EPI_ISL_760239, EPI_ISL_760240, EPI_ISL_760241, EPI_ISL_760242, EPI_ISL_760243, EPI_ISL_760244, EPI_ISL_760245                                                                                                                                                                                                                                                                                                                                                                                                                                                                 |                                                                                                                                                                                                 |                                                                                                                                        |                                                                                                                                                                                                                                                                                                                                                                                                                                                                    |
| see above                                                                                                                                                                                                                                                                                                                                                                                                                                                                                                                                                                                                                                                                                                      | Division of Emerging Infectious Diseases, Bureau of Infectious Diseases Diagnosis Control, Korea Disease Control and Prevention Agency                                                          | Division of Emerging Infectious Diseases, Bureau of Infectious Diseases Diagnosis Control, Korea Disease Control and Prevention Agency | Ae Kyung Park, Il-Hwan Kim, Heui Man Kim, Jeong-Min Kim, Namjoo Lee, Chaeyoung Lee, Sang Hee Woo, Eun-Jin Kim                                                                                                                                                                                                                                                                                                                                                      |
| EPI_ISL_760490                                                                                                                                                                                                                                                                                                                                                                                                                                                                                                                                                                                                                                                                                                 | Lighthouse Lab in Glasgow                                                                                                                                                                       | Wellcome Sanger Institute for the COVID-19 Genomics UK (COG-UK) Consortium                                                             | Harper VanSteenhouse, Yumi Kasai, David Gray, Carol Clugston, Anna Dominiczak and Alex Alderton, Roberto Amato, Sonia Goncalves, Ewan Harrison, David K. Jackson, Ian Johnston, Dominic Kwiatkowski, Cordelia Langford, John Sillitoe on behalf of the Wellcome Sanger Institute COVID-19 Surveillance Team                                                                                                                                                        |
| EPI_ISL_763099, EPI_ISL_763100, EPI_ISL_763101, EPI_ISL_763102, EPI_ISL_763103, EPI_ISL_763111, EPI_ISL_763112, EPI_ISL_763113, EPI_ISL_763114, EPI_ISL_763115, EPI_ISL_763116, EPI_ISL_763118, EPI_ISL_763119, EPI_ISL_763120, EPI_ISL_763121, EPI_ISL_763124, EPI_ISL_763125, EPI_ISL_763163, EPI_ISL_763165, EPI_ISL_763166, EPI_ISL_763167, EPI_ISL_763168, EPI_ISL_763169, EPI_ISL_763170, EPI_ISL_763171, EPI_ISL_763172, EPI_ISL_763235, EPI_ISL_763236, EPI_ISL_763237, EPI_ISL_763275, EPI_ISL_763276, EPI_ISL_763277, EPI_ISL_763305, EPI_ISL_763313                                                                                                                                                 |                                                                                                                                                                                                 |                                                                                                                                        |                                                                                                                                                                                                                                                                                                                                                                                                                                                                    |
| see above                                                                                                                                                                                                                                                                                                                                                                                                                                                                                                                                                                                                                                                                                                      | Dutch COVID-19 response team                                                                                                                                                                    | Erasmus Medical Center                                                                                                                 | Bas Oude Munnink, Reina Sikkema, David Nieuwenhuijse, Irina Chestakova, Anne van der Linden, Marjan Boter, Emmanuelle Munger, Corine GeurtsvanKessel, Anнемiek van der Eijk, Richard Molenkamp, Marion Koopmans, on behalf of the Dutch national COVID-19 response team.                                                                                                                                                                                           |
| EPI_ISL_763342                                                                                                                                                                                                                                                                                                                                                                                                                                                                                                                                                                                                                                                                                                 | Florida Bureau of Public Health Laboratories                                                                                                                                                    | Florida Bureau of Public Health Laboratories                                                                                           | Sarah Schmedes, Jason Blanton                                                                                                                                                                                                                                                                                                                                                                                                                                      |
| EPI_ISL_763873, EPI_ISL_764307, EPI_ISL_764309, EPI_ISL_764313, EPI_ISL_764325, EPI_ISL_764326, EPI_ISL_764327                                                                                                                                                                                                                                                                                                                                                                                                                                                                                                                                                                                                 | Department of Pathology, University of Cambridge                                                                                                                                                | COVID-19 Genomics UK (COG-UK) Consortium                                                                                               | Aminu S. Jahun, Yasmin Chaudhry, Grant Hall, Iliana Georgana, Myra Hosmillo, Martin D. Curran, Malte Pinckert, Surendra Parmar, Ian Goodfellow                                                                                                                                                                                                                                                                                                                     |
| EPI_ISL_764360                                                                                                                                                                                                                                                                                                                                                                                                                                                                                                                                                                                                                                                                                                 | Virology Department, Royal Infirmary of Edinburgh, NHS Lothian / School of Biological Sciences, University of Edinburgh / Institute of Genetics and Molecular Medicine, University of Edinburgh | COVID-19 Genomics UK (COG-UK) Consortium                                                                                               | McHugh M, Dewar R, Rooke S, Gallagher M, Balcaza C, O'Toole Á, Scher E, Hill V, McCrone JT, Colquhoun R, Yu X, Jackson B, Rambaut A, Williams TC, Templeton K                                                                                                                                                                                                                                                                                                      |
| EPI_ISL_765217                                                                                                                                                                                                                                                                                                                                                                                                                                                                                                                                                                                                                                                                                                 | Instituto Nacional de Saude (INSA) and Instituto Gulbenkian de Ciencia (IGC)                                                                                                                    | Instituto Nacional de Saude (INSA) and Instituto Gulbenkian de Ciencia (IGC)                                                           | Borges et al                                                                                                                                                                                                                                                                                                                                                                                                                                                       |
| EPI_ISL_765748, EPI_ISL_765749, EPI_ISL_765780, EPI_ISL_765844, EPI_ISL_765845, EPI_ISL_765846, EPI_ISL_765847, EPI_ISL_765848, EPI_ISL_765849, EPI_ISL_765852, EPI_ISL_765853, EPI_ISL_765854, EPI_ISL_765855, EPI_ISL_765856, EPI_ISL_765857, EPI_ISL_765860, EPI_ISL_765861, EPI_ISL_765864, EPI_ISL_765867, EPI_ISL_765868, EPI_ISL_765871, EPI_ISL_765872, EPI_ISL_765873, EPI_ISL_765874, EPI_ISL_765878, EPI_ISL_765879, EPI_ISL_765880, EPI_ISL_765881, EPI_ISL_765882, EPI_ISL_765886                                                                                                                                                                                                                 |                                                                                                                                                                                                 |                                                                                                                                        |                                                                                                                                                                                                                                                                                                                                                                                                                                                                    |
| see above                                                                                                                                                                                                                                                                                                                                                                                                                                                                                                                                                                                                                                                                                                      | Massachusetts General Hospital                                                                                                                                                                  | Infectious Disease Program, Broad Institute of Harvard and MIT                                                                         | Lemieux,J.E., Siddie,K.J., Shaw,B., Adams,G., Pierce,V., Turbett,S., Anahtar,M., Branda,J., Slater,D., Harris,J., Lin,A.E., Gladden-Young,A., Lagerborg,K., Rudy,M., DeRuff,K., Carter,A., Normandin,E., Bauer,M., Reilly,S., Tomkins-Tinch,C., Loreth,C., Chaluvasi,S., Neumann,A., Cusick,C., Chapman,S.B., Gnirke,A., Flowers,K., Cerrato,F., Birren,B.W., Gallagher,G., Smole,S., Park,D.J., MacInnis,B.L., Ryan,E., LaRocque,R., Rosenberg,E. and Sabeti,P.C. |
| EPI_ISL_766277                                                                                                                                                                                                                                                                                                                                                                                                                                                                                                                                                                                                                                                                                                 | Respiratory Virus Unit, National Infection Service, Public Health England                                                                                                                       | COVID-19 Genomics UK (COG-UK) Consortium                                                                                               | PHE Covid Sequencing Team                                                                                                                                                                                                                                                                                                                                                                                                                                          |
| EPI_ISL_766571, EPI_ISL_766572, EPI_ISL_766573                                                                                                                                                                                                                                                                                                                                                                                                                                                                                                                                                                                                                                                                 | ULSS 7 Pedemontana - Distretto 1                                                                                                                                                                | Istituto Zooprofilattico Sperimentale delle Venezie                                                                                    | Adelaide Milani, Alessia Schivo, Annalisa Salviato, Erika Giorgia Quaranta, Ambra Pastori, Bianca Zecchin, Alice Fusaro, Isabella Monne, Calogero Terregino, Antonia Ricci                                                                                                                                                                                                                                                                                         |
| EPI_ISL_766614                                                                                                                                                                                                                                                                                                                                                                                                                                                                                                                                                                                                                                                                                                 | unknown                                                                                                                                                                                         | The Public Health Agency of Sweden                                                                                                     | Department of Microbiology, The Public Health Agency of Sweden                                                                                                                                                                                                                                                                                                                                                                                                     |
| EPI_ISL_766617, EPI_ISL_766618, EPI_ISL_766620, EPI_ISL_766621                                                                                                                                                                                                                                                                                                                                                                                                                                                                                                                                                                                                                                                 | Klinisk mikrobiologi                                                                                                                                                                            | The Public Health Agency of Sweden                                                                                                     | Department of Microbiology, The Public Health Agency of Sweden                                                                                                                                                                                                                                                                                                                                                                                                     |

|                                                                                                                                                                                                                                                                                                                                                                                                                                                                                                                                                                                                                                                                                                                                                                                                                                                                                                                                                                                                                                                                                                                                                                                                                                                                                                                                                |                                                                                              |                                                                                                   |                                                                                                                                                                                                                                                                                                   |                                                                                                                                                                                                                                                                                                                                                                                                                                                                             |
|------------------------------------------------------------------------------------------------------------------------------------------------------------------------------------------------------------------------------------------------------------------------------------------------------------------------------------------------------------------------------------------------------------------------------------------------------------------------------------------------------------------------------------------------------------------------------------------------------------------------------------------------------------------------------------------------------------------------------------------------------------------------------------------------------------------------------------------------------------------------------------------------------------------------------------------------------------------------------------------------------------------------------------------------------------------------------------------------------------------------------------------------------------------------------------------------------------------------------------------------------------------------------------------------------------------------------------------------|----------------------------------------------------------------------------------------------|---------------------------------------------------------------------------------------------------|---------------------------------------------------------------------------------------------------------------------------------------------------------------------------------------------------------------------------------------------------------------------------------------------------|-----------------------------------------------------------------------------------------------------------------------------------------------------------------------------------------------------------------------------------------------------------------------------------------------------------------------------------------------------------------------------------------------------------------------------------------------------------------------------|
| EPI_ISL_766642, EPI_ISL_766643                                                                                                                                                                                                                                                                                                                                                                                                                                                                                                                                                                                                                                                                                                                                                                                                                                                                                                                                                                                                                                                                                                                                                                                                                                                                                                                 | Vardcentralen Brinken                                                                        | The Public Health Agency of Sweden                                                                | Department of Microbiology, The Public Health Agency of Sweden                                                                                                                                                                                                                                    |                                                                                                                                                                                                                                                                                                                                                                                                                                                                             |
| EPI_ISL_766645                                                                                                                                                                                                                                                                                                                                                                                                                                                                                                                                                                                                                                                                                                                                                                                                                                                                                                                                                                                                                                                                                                                                                                                                                                                                                                                                 | Barnakuten                                                                                   | The Public Health Agency of Sweden                                                                | Department of Microbiology, The Public Health Agency of Sweden                                                                                                                                                                                                                                    |                                                                                                                                                                                                                                                                                                                                                                                                                                                                             |
| EPI_ISL_766879, EPI_ISL_766880, EPI_ISL_766881                                                                                                                                                                                                                                                                                                                                                                                                                                                                                                                                                                                                                                                                                                                                                                                                                                                                                                                                                                                                                                                                                                                                                                                                                                                                                                 | Wyoming Public Health Laboratory                                                             | Wyoming Public Health Laboratory                                                                  | Noah Hull, Taylor Fearing, Lynette Gumbleton, Channing Weber, Ashley Norberg, Bailey Bowcutt, and Wanda Manley                                                                                                                                                                                    |                                                                                                                                                                                                                                                                                                                                                                                                                                                                             |
| EPI_ISL_766999, EPI_ISL_767003, EPI_ISL_767006                                                                                                                                                                                                                                                                                                                                                                                                                                                                                                                                                                                                                                                                                                                                                                                                                                                                                                                                                                                                                                                                                                                                                                                                                                                                                                 | Delaware Public Health Laboratory                                                            | Delaware Public Health Laboratory                                                                 | Gregory Hovan                                                                                                                                                                                                                                                                                     |                                                                                                                                                                                                                                                                                                                                                                                                                                                                             |
| EPI_ISL_767239                                                                                                                                                                                                                                                                                                                                                                                                                                                                                                                                                                                                                                                                                                                                                                                                                                                                                                                                                                                                                                                                                                                                                                                                                                                                                                                                 | Lighthouse Lab in Milton Keynes                                                              | Wellcome Sanger Institute for the COVID-19 Genomics UK (COG-UK) Consortium                        | The Lighthouse Lab in Milton Keynes and Alex Alderton, Roberto Amato, Sonia Goncalves, Ewan Harrison, David K. Jackson, Ian Johnston, Dominic Kwiatkowski, Cordelia Langford, John Sillitoe on behalf of the Wellcome Sanger Institute COVID-19 Surveillance Team                                 |                                                                                                                                                                                                                                                                                                                                                                                                                                                                             |
| EPI_ISL_767319, EPI_ISL_767320, EPI_ISL_767322, EPI_ISL_767323, EPI_ISL_767324, EPI_ISL_767327, EPI_ISL_767328, EPI_ISL_767329, EPI_ISL_767330, EPI_ISL_767333                                                                                                                                                                                                                                                                                                                                                                                                                                                                                                                                                                                                                                                                                                                                                                                                                                                                                                                                                                                                                                                                                                                                                                                 | Lighthouse Lab in Alderley Park                                                              | Wellcome Sanger Institute for the COVID-19 Genomics UK (COG-UK) Consortium                        | Jacquelyn Wynn, Mairead Hyland, The Lighthouse Lab in Alderley Park and Alex Alderton, Roberto Amato, Sonia Goncalves, Ewan Harrison, David K. Jackson, Ian Johnston, Dominic Kwiatkowski, Cordelia Langford, John Sillitoe on behalf of the Wellcome Sanger Institute COVID-19 Surveillance Team |                                                                                                                                                                                                                                                                                                                                                                                                                                                                             |
| EPI_ISL_768325, EPI_ISL_768326, EPI_ISL_768327, EPI_ISL_768328, EPI_ISL_768329, EPI_ISL_768330, EPI_ISL_768331, EPI_ISL_768332, EPI_ISL_768333, EPI_ISL_768334, EPI_ISL_768335, EPI_ISL_768336, EPI_ISL_768337, EPI_ISL_768338, EPI_ISL_768339, EPI_ISL_768340, EPI_ISL_768341, EPI_ISL_768342, EPI_ISL_768343, EPI_ISL_768344, EPI_ISL_768345, EPI_ISL_768346, EPI_ISL_768347, EPI_ISL_768348, EPI_ISL_768349, EPI_ISL_768350, EPI_ISL_768351, EPI_ISL_768352, EPI_ISL_768353, EPI_ISL_768354, EPI_ISL_768355, EPI_ISL_768356, EPI_ISL_768357, EPI_ISL_768358, EPI_ISL_768359, EPI_ISL_768360                                                                                                                                                                                                                                                                                                                                                                                                                                                                                                                                                                                                                                                                                                                                                 | see above                                                                                    | LSUHS Emerging Viral Threat Laboratory                                                            | Microbial Genome Sequencing Center                                                                                                                                                                                                                                                                | Jeremy P. Kamil, Jennifer L. Carroll, Camille F. Abshire, Maarten Van Diest, Andrew D. Yurochko, Martin J. Sapp, Rona S. Scott, Christopher G. Kevil, Daniel J. Snyder, Vaughn S. Cooper, John A. Vanchiere                                                                                                                                                                                                                                                                 |
| EPI_ISL_768522                                                                                                                                                                                                                                                                                                                                                                                                                                                                                                                                                                                                                                                                                                                                                                                                                                                                                                                                                                                                                                                                                                                                                                                                                                                                                                                                 | Synphaet Hospital                                                                            | National Institute of Health, Department of Medical Sciences, Ministry of Public Health, Thailand | Pilailuk Okada; Siripaporn Phuygun; Sittiporn Parmnen; Ratana Tacharoenmuang; Pakorn Piromtong; Natchaya Khidsang; Thanutsapa Thanadachakul; Warawan Wongboot; sirikanda wimol; Sunthareeya Waicharoen;                                                                                           |                                                                                                                                                                                                                                                                                                                                                                                                                                                                             |
| EPI_ISL_768611                                                                                                                                                                                                                                                                                                                                                                                                                                                                                                                                                                                                                                                                                                                                                                                                                                                                                                                                                                                                                                                                                                                                                                                                                                                                                                                                 | Regional medical sciences center 6 Chonburi                                                  | National Institute of Health, Department of Medical Sciences, Ministry of Public Health, Thailand | Pilailuk Okada; Siripaporn Phuygun; Sittiporn Parmnen; Ratana Tacharoenmuang; Pakorn Piromtong; Natchaya Khidsang; Thanutsapa Thanadachakul; Warawan Wongboot; sirikanda wimol; Sunthareeya Waicharoen;                                                                                           |                                                                                                                                                                                                                                                                                                                                                                                                                                                                             |
| EPI_ISL_769988                                                                                                                                                                                                                                                                                                                                                                                                                                                                                                                                                                                                                                                                                                                                                                                                                                                                                                                                                                                                                                                                                                                                                                                                                                                                                                                                 | Area De Salud San Francisco-San Antonio (Coopesana)                                          | Incienza, Instituto Costarricense de Investigación y Enseñanza en Nutrición y Salud               | Francisco Duarte, Hebleen Porras, Claudio Soto-Garita, Estela Cordero, Adriana Godínez, Melany Calderón & Mariel López                                                                                                                                                                            |                                                                                                                                                                                                                                                                                                                                                                                                                                                                             |
| EPI_ISL_769999                                                                                                                                                                                                                                                                                                                                                                                                                                                                                                                                                                                                                                                                                                                                                                                                                                                                                                                                                                                                                                                                                                                                                                                                                                                                                                                                 | Area De Salud Paraiso-Cervantes                                                              | Incienza, Instituto Costarricense de Investigación y Enseñanza en Nutrición y Salud               | Francisco Duarte, Hebleen Porras, Claudio Soto-Garita, Estela Cordero, Adriana Godínez, Melany Calderón & Mariel López                                                                                                                                                                            |                                                                                                                                                                                                                                                                                                                                                                                                                                                                             |
| EPI_ISL_770005                                                                                                                                                                                                                                                                                                                                                                                                                                                                                                                                                                                                                                                                                                                                                                                                                                                                                                                                                                                                                                                                                                                                                                                                                                                                                                                                 | Area De Salud Moravia                                                                        | Incienza, Instituto Costarricense de Investigación y Enseñanza en Nutrición y Salud               | Francisco Duarte, Hebleen Porras, Claudio Soto-Garita, Estela Cordero, Adriana Godínez, Melany Calderón & Mariel López                                                                                                                                                                            |                                                                                                                                                                                                                                                                                                                                                                                                                                                                             |
| EPI_ISL_770023                                                                                                                                                                                                                                                                                                                                                                                                                                                                                                                                                                                                                                                                                                                                                                                                                                                                                                                                                                                                                                                                                                                                                                                                                                                                                                                                 | Area De Salud San Francisco-San Antonio (Coopesana)                                          | Incienza, Instituto Costarricense de Investigación y Enseñanza en Nutrición y Salud               | Francisco Duarte, Hebleen Porras, Claudio Soto-Garita, Estela Cordero, Adriana Godínez, Melany Calderón & Mariel López                                                                                                                                                                            |                                                                                                                                                                                                                                                                                                                                                                                                                                                                             |
| EPI_ISL_770069, EPI_ISL_770086, EPI_ISL_770087, EPI_ISL_770092, EPI_ISL_770093, EPI_ISL_770095, EPI_ISL_770096, EPI_ISL_770097, EPI_ISL_770102, EPI_ISL_770103, EPI_ISL_770105, EPI_ISL_770106, EPI_ISL_770107, EPI_ISL_770108, EPI_ISL_770109, EPI_ISL_770115, EPI_ISL_770116, EPI_ISL_770117, EPI_ISL_770118, EPI_ISL_770119, EPI_ISL_770120                                                                                                                                                                                                                                                                                                                                                                                                                                                                                                                                                                                                                                                                                                                                                                                                                                                                                                                                                                                                 | see above                                                                                    | Wyoming Public Health Laboratory                                                                  | Wyoming Public Health Laboratory                                                                                                                                                                                                                                                                  | Noah Hull, Taylor Fearing, Lynette Gumbleton, Channing Weber, Ashley Norberg, Bailey Bowcutt, and Wanda Manley                                                                                                                                                                                                                                                                                                                                                              |
| EPI_ISL_770551, EPI_ISL_770553, EPI_ISL_770555, EPI_ISL_770557, EPI_ISL_770558, EPI_ISL_770559, EPI_ISL_770560, EPI_ISL_770561, EPI_ISL_770562, EPI_ISL_770563, EPI_ISL_770565, EPI_ISL_770567, EPI_ISL_770568, EPI_ISL_770569, EPI_ISL_770570, EPI_ISL_770575, EPI_ISL_770576, EPI_ISL_770578, EPI_ISL_770579, EPI_ISL_770580, EPI_ISL_770581, EPI_ISL_770585, EPI_ISL_770586, EPI_ISL_770587, EPI_ISL_770591, EPI_ISL_770592, EPI_ISL_770595, EPI_ISL_770596, EPI_ISL_770597, EPI_ISL_770598, EPI_ISL_770599, EPI_ISL_770601, EPI_ISL_770602, EPI_ISL_770603, EPI_ISL_770604, EPI_ISL_770605, EPI_ISL_770606, EPI_ISL_770607, EPI_ISL_770608, EPI_ISL_770609, EPI_ISL_770610, EPI_ISL_770611, EPI_ISL_770612, EPI_ISL_770614, EPI_ISL_770616, EPI_ISL_770618, EPI_ISL_770621, EPI_ISL_770622, EPI_ISL_770623, EPI_ISL_770624, EPI_ISL_770625, EPI_ISL_770627, EPI_ISL_770630                                                                                                                                                                                                                                                                                                                                                                                                                                                                 | see above                                                                                    | Laboratório de Microbiologia Molecular - Universidade FEEVALE                                     | Bioinformatics Laboratory / LNCC                                                                                                                                                                                                                                                                  | Felipe Benites, Fernando Rosado Spilki, Alana Witt Hansen, Juliane Deise Fleck, Juliana Schons, Meriane Demoliner, Ana Karolina Eisen Antunes, Fagner Henrique Heldt, Larissa Mallmann, Bruna Hermann, Ana Luiza Ziulkoski, Vctoria Goes, Karoline Schallenberg, Matheus Nunes Weber, Paula Rodrigues de Almeida, Alessandra Pavan Lamarca da Silva, Ronaldo da Silva F Jr , Luiz G P de Almeida, Alexandra L Gerber , Ana Paula de C Guimarães,Ana Tereza R de Vasconcelos |
| EPI_ISL_770674                                                                                                                                                                                                                                                                                                                                                                                                                                                                                                                                                                                                                                                                                                                                                                                                                                                                                                                                                                                                                                                                                                                                                                                                                                                                                                                                 | WHO National Influenza Centre Russian Federation                                             | WHO National Influenza Centre Russian Federation                                                  | Andrey Komissarov, Artem Fadeev, Anna Ivanova, Kseniya Komissarova, Dmitry Bazhenov, Daria Danilenko, Ksenia Safina, Elena Nabieva, Georgii Bazykin, Dmitry Lioznov                                                                                                                               |                                                                                                                                                                                                                                                                                                                                                                                                                                                                             |
| EPI_ISL_770717, EPI_ISL_770718                                                                                                                                                                                                                                                                                                                                                                                                                                                                                                                                                                                                                                                                                                                                                                                                                                                                                                                                                                                                                                                                                                                                                                                                                                                                                                                 | ZOTZ KLIMAS MVZ Düsseldorf-Centrum GbR ÜBAG für Labormedizin, Genetik, Zytologie, Pathologie | Center of Medical Microbiology, Virology, and Hospital Hygiene, University of Duesseldorf         | Maximilian Damagnez, Alexander Dilthey, Ashley-Jane Duplessis, Patrick Finzer, Katrin Hoffmann, Torsten Houwaart, Lisanna Hülse, Malte Kohns Vasconcelos, Marek Korencak, Nadine Lübke, Jessica Nicolai, Klaus Pfeffer, Daniel Strelow, Jörg Timm, Andreas Walker, Tobias Wienemann, Rainer Zöfel |                                                                                                                                                                                                                                                                                                                                                                                                                                                                             |
| EPI_ISL_770780, EPI_ISL_770781, EPI_ISL_770782                                                                                                                                                                                                                                                                                                                                                                                                                                                                                                                                                                                                                                                                                                                                                                                                                                                                                                                                                                                                                                                                                                                                                                                                                                                                                                 | Minnesota Department of Health, Public Health Laboratory                                     | Minnesota Department of Health, Public Health Laboratory                                          | Alexandra Lorentz, Jacob Garfin, Matt Plumb, and Xiong Wang                                                                                                                                                                                                                                       |                                                                                                                                                                                                                                                                                                                                                                                                                                                                             |
| EPI_ISL_770809, EPI_ISL_770812                                                                                                                                                                                                                                                                                                                                                                                                                                                                                                                                                                                                                                                                                                                                                                                                                                                                                                                                                                                                                                                                                                                                                                                                                                                                                                                 | Essentia Health-St. Mary's Medical Center                                                    | Minnesota Department of Health, Public Health Laboratory                                          | Alexandra Lorentz, Jacob Garfin, Matt Plumb, and Xiong Wang                                                                                                                                                                                                                                       |                                                                                                                                                                                                                                                                                                                                                                                                                                                                             |
| EPI_ISL_770814                                                                                                                                                                                                                                                                                                                                                                                                                                                                                                                                                                                                                                                                                                                                                                                                                                                                                                                                                                                                                                                                                                                                                                                                                                                                                                                                 | Vault Health                                                                                 | Minnesota Department of Health, Public Health Laboratory                                          | Alexandra Lorentz, Jacob Garfin, Matt Plumb, and Xiong Wang                                                                                                                                                                                                                                       |                                                                                                                                                                                                                                                                                                                                                                                                                                                                             |
| EPI_ISL_770890, EPI_ISL_770891, EPI_ISL_770893, EPI_ISL_770896, EPI_ISL_770908, EPI_ISL_770910, EPI_ISL_770911, EPI_ISL_770912, EPI_ISL_770913, EPI_ISL_770914, EPI_ISL_770915, EPI_ISL_770916, EPI_ISL_770918, EPI_ISL_770919, EPI_ISL_770920, EPI_ISL_770921, EPI_ISL_770922, EPI_ISL_770923, EPI_ISL_770924, EPI_ISL_770925, EPI_ISL_770926, EPI_ISL_770927, EPI_ISL_770928, EPI_ISL_770929, EPI_ISL_770930, EPI_ISL_770931, EPI_ISL_770938, EPI_ISL_770939, EPI_ISL_770940, EPI_ISL_770942, EPI_ISL_770950, EPI_ISL_770956, EPI_ISL_770957, EPI_ISL_770958, EPI_ISL_770959, EPI_ISL_770960, EPI_ISL_770961, EPI_ISL_770964, EPI_ISL_770965, EPI_ISL_770966, EPI_ISL_770967, EPI_ISL_770968, EPI_ISL_770969, EPI_ISL_770970, EPI_ISL_770973                                                                                                                                                                                                                                                                                                                                                                                                                                                                                                                                                                                                 | see above                                                                                    | Laboratoire national de santé, Microbiology, Virology                                             | Laboratoire national de santé, Microbiology, Microbial Genomics Platform                                                                                                                                                                                                                          | Anke Wienecke-Baldacchino, Catherine Ragimbeau,Jessica Tapp, Fatu Djabi, Lise Pignon, Raoul Salmon, Tamir Abdelrahman                                                                                                                                                                                                                                                                                                                                                       |
| EPI_ISL_771189, EPI_ISL_771191, EPI_ISL_771222, EPI_ISL_771223, EPI_ISL_771247, EPI_ISL_771248, EPI_ISL_771249, EPI_ISL_771250, EPI_ISL_771253, EPI_ISL_771254, EPI_ISL_771255, EPI_ISL_771256, EPI_ISL_771257, EPI_ISL_771258, EPI_ISL_771260, EPI_ISL_771261, EPI_ISL_771262, EPI_ISL_771263, EPI_ISL_771265, EPI_ISL_771266, EPI_ISL_771267, EPI_ISL_771268, EPI_ISL_771269, EPI_ISL_771271, EPI_ISL_771272, EPI_ISL_771273, EPI_ISL_771274, EPI_ISL_771275, EPI_ISL_771276, EPI_ISL_771277, EPI_ISL_771278, EPI_ISL_771279, EPI_ISL_771280, EPI_ISL_771281, EPI_ISL_771282, EPI_ISL_771284, EPI_ISL_771285, EPI_ISL_771287, EPI_ISL_771289, EPI_ISL_771290, EPI_ISL_771291, EPI_ISL_771292, EPI_ISL_771294, EPI_ISL_771295, EPI_ISL_771296, EPI_ISL_771297, EPI_ISL_771298, EPI_ISL_771302, EPI_ISL_771303, EPI_ISL_771304, EPI_ISL_771305, EPI_ISL_771306, EPI_ISL_771308, EPI_ISL_771309, EPI_ISL_771310, EPI_ISL_771311, EPI_ISL_771312, EPI_ISL_771313, EPI_ISL_771315, EPI_ISL_771316, EPI_ISL_771318, EPI_ISL_771319, EPI_ISL_771320, EPI_ISL_771321, EPI_ISL_771322, EPI_ISL_771325, EPI_ISL_771328, EPI_ISL_771329, EPI_ISL_771334, EPI_ISL_771336, EPI_ISL_771339, EPI_ISL_771340, EPI_ISL_771341, EPI_ISL_771343, EPI_ISL_771344, EPI_ISL_771350, EPI_ISL_771351, EPI_ISL_771352, EPI_ISL_771354, EPI_ISL_771357, EPI_ISL_771360 | see above                                                                                    | Colorado Department of Public Health and Environment                                              | Colorado Department of Puplic Health and Environment                                                                                                                                                                                                                                              | Laura Bankers, Molly C. Hetherington-Rauth, Diana Ir, Shannon Ely, Shannon R. Matzinger, Sarah Elizabeth Totten, Emily A. Travanty                                                                                                                                                                                                                                                                                                                                          |
| EPI_ISL_775276                                                                                                                                                                                                                                                                                                                                                                                                                                                                                                                                                                                                                                                                                                                                                                                                                                                                                                                                                                                                                                                                                                                                                                                                                                                                                                                                 | Haukeland University Hospital, Dept. of Microbiology                                         | Norwegian Institute of Public Health, Department of Virology                                      | Kathrine Stene-Johansen, Kamilla Heddeland Instefjord, Hilde Elshaug, Atiya R Ali,Marie Paulsen Madsen, Rasmus Riis Kopperud, Hilde Vollan, Karoline Bragstad, Olav Hungnes                                                                                                                       |                                                                                                                                                                                                                                                                                                                                                                                                                                                                             |
| EPI_ISL_775284                                                                                                                                                                                                                                                                                                                                                                                                                                                                                                                                                                                                                                                                                                                                                                                                                                                                                                                                                                                                                                                                                                                                                                                                                                                                                                                                 | Oslo University Hospital, Department of Medical Microbiology                                 | Norwegian Institute of Public Health, Department of Virology                                      | Kathrine Stene-Johansen, Kamilla Heddeland Instefjord, Hilde Elshaug, Atiya R Ali,Marie Paulsen Madsen, Rasmus Riis Kopperud, Hilde Vollan, Karoline Bragstad, Olav Hungnes                                                                                                                       |                                                                                                                                                                                                                                                                                                                                                                                                                                                                             |
| EPI_ISL_775285                                                                                                                                                                                                                                                                                                                                                                                                                                                                                                                                                                                                                                                                                                                                                                                                                                                                                                                                                                                                                                                                                                                                                                                                                                                                                                                                 | Hospital of Southern Norway - Kristiansand, Department of Medical Microbiology               | Norwegian Institute of Public Health, Department of Virology                                      | Kathrine Stene-Johansen, Kamilla Heddeland Instefjord, Hilde Elshaug, Atiya R Ali,Marie Paulsen Madsen, Rasmus Riis Kopperud, Hilde Vollan, Karoline Bragstad, Olav Hungnes                                                                                                                       |                                                                                                                                                                                                                                                                                                                                                                                                                                                                             |
| EPI_ISL_775286, EPI_ISL_775287, EPI_ISL_775288, EPI_ISL_775289, EPI_ISL_775290                                                                                                                                                                                                                                                                                                                                                                                                                                                                                                                                                                                                                                                                                                                                                                                                                                                                                                                                                                                                                                                                                                                                                                                                                                                                 | Nordland Hospital - Bodo, Laboratory Department, Molecular Biology Unit                      | Norwegian Institute of Public Health, Department of Virology                                      | Kathrine Stene-Johansen, Kamilla Heddeland Instefjord, Hilde Elshaug, Atiya R Ali,Marie Paulsen Madsen, Rasmus Riis Kopperud, Hilde Vollan, Karoline Bragstad, Olav Hungnes                                                                                                                       |                                                                                                                                                                                                                                                                                                                                                                                                                                                                             |
| EPI_ISL_775294                                                                                                                                                                                                                                                                                                                                                                                                                                                                                                                                                                                                                                                                                                                                                                                                                                                                                                                                                                                                                                                                                                                                                                                                                                                                                                                                 | Furst Medical Laboratory                                                                     | Norwegian Institute of Public Health, Department of Virology                                      | Kathrine Stene-Johansen, Kamilla Heddeland Instefjord, Hilde Elshaug, Atiya R Ali,Marie Paulsen Madsen, Rasmus Riis Kopperud, Hilde Vollan, Karoline Bragstad, Olav Hungnes                                                                                                                       |                                                                                                                                                                                                                                                                                                                                                                                                                                                                             |
| EPI_ISL_775297                                                                                                                                                                                                                                                                                                                                                                                                                                                                                                                                                                                                                                                                                                                                                                                                                                                                                                                                                                                                                                                                                                                                                                                                                                                                                                                                 | Nordland Hospital - Bodo, Laboratory Department, Molecular Biology Unit                      | Norwegian Institute of Public Health, Department of Virology                                      | Kathrine Stene-Johansen, Kamilla Heddeland Instefjord, Hilde Elshaug, Atiya R Ali,Marie Paulsen Madsen, Rasmus Riis Kopperud, Hilde Vollan, Karoline Bragstad, Olav Hungnes                                                                                                                       |                                                                                                                                                                                                                                                                                                                                                                                                                                                                             |







|                                                                                                                                                                                                                                                                                                                                                                                                                                                                                                                                                                                                                                                                                                                                                                |                                                                                                                                                                                                 |                                                                                                                               |                                                                                                                                                                                                                                                                                                                                                                                                                                                                                                                                                                                                                                                                                                                                                                                                                                   |
|----------------------------------------------------------------------------------------------------------------------------------------------------------------------------------------------------------------------------------------------------------------------------------------------------------------------------------------------------------------------------------------------------------------------------------------------------------------------------------------------------------------------------------------------------------------------------------------------------------------------------------------------------------------------------------------------------------------------------------------------------------------|-------------------------------------------------------------------------------------------------------------------------------------------------------------------------------------------------|-------------------------------------------------------------------------------------------------------------------------------|-----------------------------------------------------------------------------------------------------------------------------------------------------------------------------------------------------------------------------------------------------------------------------------------------------------------------------------------------------------------------------------------------------------------------------------------------------------------------------------------------------------------------------------------------------------------------------------------------------------------------------------------------------------------------------------------------------------------------------------------------------------------------------------------------------------------------------------|
| EPI_ISL_802567                                                                                                                                                                                                                                                                                                                                                                                                                                                                                                                                                                                                                                                                                                                                                 | Essentia Health-St. Mary's Medical Center                                                                                                                                                       | Minnesota Department of Health, Public Health Laboratory                                                                      | Alexandra Lorentz, Jacob Garfin, Matt Plumb, and Xiong Wang                                                                                                                                                                                                                                                                                                                                                                                                                                                                                                                                                                                                                                                                                                                                                                       |
| EPI_ISL_802856, EPI_ISL_802857, EPI_ISL_802858                                                                                                                                                                                                                                                                                                                                                                                                                                                                                                                                                                                                                                                                                                                 | Vilnius University Hospital Santaros Klinikos, Vilnius University                                                                                                                               | Institute of Biotechnology, Life Sciences Center, Vilnius University                                                          | Emilija Vasilunaite, Milda Norkiene, Albertas Timinskas, Alma Gedvilaite, Aurelija Zvirbliene, Daniel Naumovas, Laimonas Griskevicius                                                                                                                                                                                                                                                                                                                                                                                                                                                                                                                                                                                                                                                                                             |
| EPI_ISL_803100                                                                                                                                                                                                                                                                                                                                                                                                                                                                                                                                                                                                                                                                                                                                                 | Respiratory Viruses Branch, Centers for Disease Control and Prevention                                                                                                                          | Respiratory Viruses Branch, Centers for Disease Control and Prevention                                                        | Queen,K., Li,Y., Tao,Y., Uehara,A., Montmayeur,A., Paden,C.R., Cook,P.W., Marine,R., Sheth,M., Wang,H., Lee,J., Tong,S.                                                                                                                                                                                                                                                                                                                                                                                                                                                                                                                                                                                                                                                                                                           |
| EPI_ISL_804226                                                                                                                                                                                                                                                                                                                                                                                                                                                                                                                                                                                                                                                                                                                                                 | Respiratory Virus Unit, National Infection Service, Public Health England                                                                                                                       | COVID-19 Genomics UK (COG-UK) Consortium                                                                                      | PHE Covid Sequencing Team                                                                                                                                                                                                                                                                                                                                                                                                                                                                                                                                                                                                                                                                                                                                                                                                         |
| EPI_ISL_804582                                                                                                                                                                                                                                                                                                                                                                                                                                                                                                                                                                                                                                                                                                                                                 | MEPHI, Aix Marseille University                                                                                                                                                                 | MEPHI, Aix Marseille University                                                                                               | Anthony LEVASSEUR                                                                                                                                                                                                                                                                                                                                                                                                                                                                                                                                                                                                                                                                                                                                                                                                                 |
| EPI_ISL_804791, EPI_ISL_804795, EPI_ISL_804799                                                                                                                                                                                                                                                                                                                                                                                                                                                                                                                                                                                                                                                                                                                 | Michigan Department of Health and Human Services, Bureau of Laboratories                                                                                                                        | Michigan Department of Health and Human Services, Bureau of Laboratories                                                      | Blankenship HM, Riner D, Soehnlen MK                                                                                                                                                                                                                                                                                                                                                                                                                                                                                                                                                                                                                                                                                                                                                                                              |
| EPI_ISL_804855                                                                                                                                                                                                                                                                                                                                                                                                                                                                                                                                                                                                                                                                                                                                                 | DC Public Health Lab/ Dept. of Forensic Sciences                                                                                                                                                | DC Public Health Lab/ Dept. of Forensic Sciences                                                                              | Scott Nguyen, Elizabeth Zelaya, Connie Maza, Monica Mann, Brittany Hamilton, David Payne, Jocelyn Hauser                                                                                                                                                                                                                                                                                                                                                                                                                                                                                                                                                                                                                                                                                                                          |
| EPI_ISL_807100, EPI_ISL_807121                                                                                                                                                                                                                                                                                                                                                                                                                                                                                                                                                                                                                                                                                                                                 | Washington State Department of Health                                                                                                                                                           | Seattle Flu Study                                                                                                             | Deborah A. Nickerson, Chris D. Frazar, Jover Lee, Benjamin Pelle, Matthew Richardson, Amanda Adler, Elisabeth Brandstetter, Peter D. Han, Kairsten Fay, Misja Ilcisin, Kirsten Lacombe, Thomas R. Sibley, Melissa Truong, Caitlin R. Wolf, Romesh Gautom, Geoff Melly, Brian Hiatt, Philip Dykema, Scott Lindquist, Michael Boeckh, Janet A. Englund, Michael Famulare, Barry R. Lutz, Mark J. Rieder, Lea M. Starita, Matthew Thompson, Helen Y. Chu, Jay Shendure, Trevor Bedford                                                                                                                                                                                                                                                                                                                                               |
| EPI_ISL_812152, EPI_ISL_812153, EPI_ISL_812154, EPI_ISL_812155                                                                                                                                                                                                                                                                                                                                                                                                                                                                                                                                                                                                                                                                                                 | GA Department of Public Health Laboratory                                                                                                                                                       | Pathogen Discovery, Respiratory Viruses Branch, Division of Viral Diseases, Centers for Disease Control and Prevention        | Yan Li, Ying Tao, Anna Montmayeur, Jing Zhang, Brian Lynch, Krista Queen, Anna Uehara, Rachel Marine, Peter Cook, Clinton R. Paden, Haibin Wang, Suxiang Tong                                                                                                                                                                                                                                                                                                                                                                                                                                                                                                                                                                                                                                                                     |
| EPI_ISL_812204, EPI_ISL_812205, EPI_ISL_812206, EPI_ISL_812210, EPI_ISL_812211, EPI_ISL_812212, EPI_ISL_812213, EPI_ISL_812214, EPI_ISL_812215, EPI_ISL_812217, EPI_ISL_812218, EPI_ISL_812221, EPI_ISL_812222, EPI_ISL_812223, EPI_ISL_812224, EPI_ISL_812225, EPI_ISL_812228, EPI_ISL_812229, EPI_ISL_812230, EPI_ISL_812231                                                                                                                                                                                                                                                                                                                                                                                                                                 | GA Department of Public Health Laboratory                                                                                                                                                       | Pathogen Discovery, Respiratory Viruses Branch, Division of Viral Diseases, Centers for Disease Control and Prevention        | Yan Li, Ying Tao, Anna Montmayeur, Jing Zhang, Brian Lynch, Krista Queen, Anna Uehara, Rachel Marine, Peter Cook, Clinton R. Paden, Haibin Wang, Suxiang Tong                                                                                                                                                                                                                                                                                                                                                                                                                                                                                                                                                                                                                                                                     |
| see above                                                                                                                                                                                                                                                                                                                                                                                                                                                                                                                                                                                                                                                                                                                                                      | TN Division of Laboratory Services                                                                                                                                                              | Pathogen Discovery, Respiratory Viruses Branch, Division of Viral Diseases, Centers for Disease Control and Prevention        | Yan Li, Ying Tao, Anna Montmayeur, Jing Zhang, Brian Lynch, Krista Queen, Anna Uehara, Rachel Marine, Peter Cook, Clinton R. Paden, Haibin Wang, Suxiang Tong                                                                                                                                                                                                                                                                                                                                                                                                                                                                                                                                                                                                                                                                     |
| EPI_ISL_813045, EPI_ISL_813047, EPI_ISL_813050, EPI_ISL_813051, EPI_ISL_813053, EPI_ISL_813054, EPI_ISL_813055, EPI_ISL_813059                                                                                                                                                                                                                                                                                                                                                                                                                                                                                                                                                                                                                                 | University of Birmingham                                                                                                                                                                        | COVID-19 Genomics UK (COG-UK) Consortium                                                                                      | Institute of Microbiology, University of Birmingham: Claire McMurray, Joanne Stockton, Samuel Nicholls, Radoslaw Poplawski, Will Rowe, Josh Quick, Nicholas Loman. University of Birmingham Testing Laboratory: Celina M Whalley, Andrew Bosworth, Charlotte Poxon, Kasun Wanigasooriya, Oliver Pickles, Mike Kidd, Alex Richter, Andrew D Beggs PHE Heartlands Lab: Husam Osman, Andrew Bosworth. Queen Elizabeth Hospital: Anna Casey                                                                                                                                                                                                                                                                                                                                                                                           |
| EPI_ISL_814571, EPI_ISL_814665, EPI_ISL_814680                                                                                                                                                                                                                                                                                                                                                                                                                                                                                                                                                                                                                                                                                                                 | Virology Department, Royal Infirmary of Edinburgh, NHS Lothian / School of Biological Sciences, University of Edinburgh / Institute of Genetics and Molecular Medicine, University of Edinburgh | COVID-19 Genomics UK (COG-UK) Consortium                                                                                      | McHugh M, Dewar R, Rooke S, Gallagher M, Balcaza C, O'Toole Á, Scher E, Hill V, McCrone JT, Colquhoun R, Yu X, Jackson B, Rambaut A, Williams TC, Templeton K                                                                                                                                                                                                                                                                                                                                                                                                                                                                                                                                                                                                                                                                     |
| EPI_ISL_814771, EPI_ISL_814781, EPI_ISL_814783, EPI_ISL_814794, EPI_ISL_814797                                                                                                                                                                                                                                                                                                                                                                                                                                                                                                                                                                                                                                                                                 | Wales Specialist Virology Centre Sequencing lab: Pathogen Genomics Unit                                                                                                                         | COVID-19 Genomics UK (COG-UK) Consortium                                                                                      | Catherine Moore, Johnathan Evans, Laura Gifford, Malorie Perry, Simon Cottrell, Angela Marchbank, Alec Birchley, Alexander Adams, Amy Gaskin, Bree Gatica-Wilcox, Jason Coombes, Joel Southgate, Lauren Gilbert, Lee Graham, Nicole Pacchiarini, Sara Kucziene-Summerhayes, Sarah Taylor, Sophie Jones, Sara Rey, Matthew Bull, Joanne Watkins, Sally Corden, Tom Connor                                                                                                                                                                                                                                                                                                                                                                                                                                                          |
| EPI_ISL_815525, EPI_ISL_815558, EPI_ISL_815597, EPI_ISL_815598, EPI_ISL_815599, EPI_ISL_815600, EPI_ISL_815654, EPI_ISL_816068, EPI_ISL_816069, EPI_ISL_816070, EPI_ISL_816071, EPI_ISL_816072, EPI_ISL_816073, EPI_ISL_816074, EPI_ISL_816075, EPI_ISL_816076, EPI_ISL_816077, EPI_ISL_816078, EPI_ISL_816079, EPI_ISL_816080, EPI_ISL_816081, EPI_ISL_816082, EPI_ISL_816084, EPI_ISL_816085, EPI_ISL_816086, EPI_ISL_816087, EPI_ISL_816089, EPI_ISL_816090, EPI_ISL_816091, EPI_ISL_816092, EPI_ISL_816093, EPI_ISL_816094, EPI_ISL_816095, EPI_ISL_816096, EPI_ISL_816097, EPI_ISL_816098, EPI_ISL_816100, EPI_ISL_816101, EPI_ISL_816102, EPI_ISL_816103, EPI_ISL_816104, EPI_ISL_816106, EPI_ISL_816107, EPI_ISL_816108, EPI_ISL_816109, EPI_ISL_816110 | Department of Virus and Microbiological Special Diagnostics, Statens Serum Institut, Copenhagen, Denmark                                                                                        | Albertsen Lab, Department of Chemistry and Bioscience, Aalborg University, Denmark                                            | Danish Covid-19 Genome Consortium                                                                                                                                                                                                                                                                                                                                                                                                                                                                                                                                                                                                                                                                                                                                                                                                 |
| EPI_ISL_819479, EPI_ISL_819493, EPI_ISL_819503, EPI_ISL_819504, EPI_ISL_819521, EPI_ISL_819522                                                                                                                                                                                                                                                                                                                                                                                                                                                                                                                                                                                                                                                                 | Lincolnshire Hospitals and DeepSeq Nottingham                                                                                                                                                   | COVID-19 Genomics UK (COG-UK) Consortium                                                                                      | Nichola Duckworth, Tim Sloan, Sarah Walsh, Jonathan Ball, Patrick McClure, Joseph Chappell, Nadine Holmes, Matthew Carlisle, Christopher Moore, Fei Sang, Johnny Debebe, Victoria Wright, Matthew Loose                                                                                                                                                                                                                                                                                                                                                                                                                                                                                                                                                                                                                           |
| EPI_ISL_823971                                                                                                                                                                                                                                                                                                                                                                                                                                                                                                                                                                                                                                                                                                                                                 | OCME Office Of Chief Medical Examiner                                                                                                                                                           | New York City Public Health Laboratory                                                                                        | Jade Wang, et al.                                                                                                                                                                                                                                                                                                                                                                                                                                                                                                                                                                                                                                                                                                                                                                                                                 |
| EPI_ISL_824000, EPI_ISL_824001, EPI_ISL_824008, EPI_ISL_824012, EPI_ISL_824017, EPI_ISL_824050, EPI_ISL_824126, EPI_ISL_824127, EPI_ISL_824131                                                                                                                                                                                                                                                                                                                                                                                                                                                                                                                                                                                                                 | Dutch COVID-19 response team                                                                                                                                                                    | National Institute for Public Health and the Environment (RIVM)                                                               | Adam Meijer, Harry Vennema, Jeroen Cremer, Sharon van den Brink, Bas van der Veer, AnneMarie van den Brandt, Florian Zwagemaker, Dennis Schmitz, Chantal Reusken, on behalf of the national COVID-19 response team                                                                                                                                                                                                                                                                                                                                                                                                                                                                                                                                                                                                                |
| EPI_ISL_824393, EPI_ISL_824395                                                                                                                                                                                                                                                                                                                                                                                                                                                                                                                                                                                                                                                                                                                                 | California Department of Public Health                                                                                                                                                          | California Department of Public Health                                                                                        | CDPH IDLB COVIDNet                                                                                                                                                                                                                                                                                                                                                                                                                                                                                                                                                                                                                                                                                                                                                                                                                |
| EPI_ISL_824518                                                                                                                                                                                                                                                                                                                                                                                                                                                                                                                                                                                                                                                                                                                                                 | New Mexico Department of Health Scientific Laboratory                                                                                                                                           | New Mexico Department of Health Scientific Laboratory                                                                         | Ellie Johnson, Anastacia Griego-Fisher, D'eldra Malone                                                                                                                                                                                                                                                                                                                                                                                                                                                                                                                                                                                                                                                                                                                                                                            |
| EPI_ISL_824659, EPI_ISL_824670, EPI_ISL_824682, EPI_ISL_824694, EPI_ISL_824705, EPI_ISL_824706, EPI_ISL_824717, EPI_ISL_824718, EPI_ISL_824729, EPI_ISL_824740, EPI_ISL_824741                                                                                                                                                                                                                                                                                                                                                                                                                                                                                                                                                                                 | Cedars-Sinai Medical Center, Department of Pathology & Laboratory Medicine, Molecular Pathology Laboratory                                                                                      | Cedars-Sinai Medical Center, Molecular Pathology Laboratory of Department of Pathology & Laboratory Medicine and Genomic Core | Wenjuan Zhang, Brian Davis, Stephanie Chen, Jorge Mario Sincuir Martinez, Jasmine T Plummer, Eric Vail                                                                                                                                                                                                                                                                                                                                                                                                                                                                                                                                                                                                                                                                                                                            |
| EPI_ISL_825042                                                                                                                                                                                                                                                                                                                                                                                                                                                                                                                                                                                                                                                                                                                                                 | B.J. Medical College and Civil hospital, Ahmedabad                                                                                                                                              | Gujarat Biotechnology Research Centre                                                                                         | Apurvashin Puvar, Ramesh Pandit, Janvi Raval, Zarna Patel, Nitin Savaliya, Dinesh Kumar, Zuber Saiyed, Labdhi Pandya, Afzal Ansari, Nikha Trivedi, Pranay Shah, Kamlesh J Upadhyay, Sanjay Kapadia, Dipa Kinariwala, Chaitanya Joshi, Madhvi Joshi                                                                                                                                                                                                                                                                                                                                                                                                                                                                                                                                                                                |
| EPI_ISL_825327, EPI_ISL_825335, EPI_ISL_825358, EPI_ISL_825360, EPI_ISL_825361, EPI_ISL_825362, EPI_ISL_825363, EPI_ISL_825364, EPI_ISL_825365, EPI_ISL_825366, EPI_ISL_825384                                                                                                                                                                                                                                                                                                                                                                                                                                                                                                                                                                                 | Hospital Universitari Vall d'Hebron - Vall d'Hebron Institut de Rercerca                                                                                                                        | Hospital Universitari Vall d'Hebron                                                                                           | Cristina Andrés, Maria Piñana, Josep F Abril, Damir Garcia-Cehic, Ariadna Rando, Juliàna Esperalba, Maria Gema Codina, Carla Castillo, Maria Carmen Martín, Tomás Pumarola, Josep Quer, Andrés Antón                                                                                                                                                                                                                                                                                                                                                                                                                                                                                                                                                                                                                              |
| EPI_ISL_825604                                                                                                                                                                                                                                                                                                                                                                                                                                                                                                                                                                                                                                                                                                                                                 | Respiratory Virus Unit, National Infection Service, Public Health England                                                                                                                       | COVID-19 Genomics UK (COG-UK) Consortium                                                                                      | PHE Covid Sequencing Team                                                                                                                                                                                                                                                                                                                                                                                                                                                                                                                                                                                                                                                                                                                                                                                                         |
| EPI_ISL_826673, EPI_ISL_826723, EPI_ISL_826879, EPI_ISL_826914, EPI_ISL_826932, EPI_ISL_826995, EPI_ISL_826998, EPI_ISL_827068, EPI_ISL_827152, EPI_ISL_827267                                                                                                                                                                                                                                                                                                                                                                                                                                                                                                                                                                                                 | deCODE genetics                                                                                                                                                                                 | deCODE genetics                                                                                                               | Daniel F Gudbjartsson; Agnar Helgason; Hakon Jonsson; Olafur T Magnusson; Pall Melsted; Gudmundur L Norddahl; Jona Saemundsdottir; Asgeir Sigurdsson; Patrick Sulem; Arna B Agustsdottir; Hannes Eggertsson; Berglind Eiríksdóttir; Run Fridriksdóttir; Elisabet E Gardarsdóttir; Gudmundur Georgsson; Olafía S Gretarsdóttir; Kjartan R Gudmundsson; Thora R Gunnarsdóttir; Arnaldur Gylfason; Hilma Holm; Brynjar O Jensson; Aslaug Jonasdóttir; Kamilla S Josefsdóttir; Thordur Kristjánsson; Droplaug N Magnúsdóttir; Solvi Rognvaldsson; Louise le Roux; Gudrun Sigmundsdóttir; Gardar Sveinbjörnsson; Kristin E Sveinsdóttir; Maney Sveinsdóttir; Emil A Thorarensen; Bjarni Thorbjörnsson; Gisli Masson; Ingileif Jonsdóttir; Alma Moller; Thorolfur Gudnason; Karl G Kristinnson; Unnur Thorsteinsdóttir; Kari Stefansson |
| EPI_ISL_827395                                                                                                                                                                                                                                                                                                                                                                                                                                                                                                                                                                                                                                                                                                                                                 | The National University Hospital of Iceland                                                                                                                                                     | deCODE genetics                                                                                                               | Daniel F Gudbjartsson; Agnar Helgason; Hakon Jonsson; Olafur T Magnusson; Pall Melsted; Gudmundur L Norddahl; Jona Saemundsdottir; Asgeir Sigurdsson; Patrick Sulem; Arna B Agustsdottir; Hannes Eggertsson; Berglind Eiríksdóttir; Run Fridriksdóttir; Elisabet E Gardarsdóttir; Gudmundur Georgsson; Olafía S Gretarsdóttir; Kjartan R Gudmundsson; Thora R Gunnarsdóttir; Arnaldur Gylfason; Hilma Holm; Brynjar O Jensson; Aslaug Jonasdóttir; Kamilla S Josefsdóttir; Thordur Kristjánsson; Droplaug N Magnúsdóttir; Solvi Rognvaldsson; Louise le Roux; Gudrun Sigmundsdóttir; Gardar Sveinbjörnsson; Kristin E Sveinsdóttir; Maney Sveinsdóttir; Emil A Thorarensen; Bjarni Thorbjörnsson; Gisli Masson; Ingileif Jonsdóttir; Alma Moller; Thorolfur Gudnason; Karl G Kristinnson; Unnur Thorsteinsdóttir; Kari Stefansson |
| EPI_ISL_827399, EPI_ISL_827400, EPI_ISL_827402, EPI_ISL_827442, EPI_ISL_827458, EPI_ISL_827826, EPI_ISL_827830, EPI_ISL_827861, EPI_ISL_827894, EPI_ISL_827906, EPI_ISL_827965, EPI_ISL_828026, EPI_ISL_828090, EPI_ISL_828093, EPI_ISL_828097, EPI_ISL_828110, EPI_ISL_828139, EPI_ISL_828148, EPI_ISL_828151, EPI_ISL_828152, EPI_ISL_828173                                                                                                                                                                                                                                                                                                                                                                                                                 |                                                                                                                                                                                                 |                                                                                                                               |                                                                                                                                                                                                                                                                                                                                                                                                                                                                                                                                                                                                                                                                                                                                                                                                                                   |

|                                                                                                                                                                                                                                                                                                                                                                                                                                                                                                                                                                                                                                                                                |                                                                                                                                                                                                 |                                                                                          |                                                                                                                                                                                                                                                                                                                                                                                                                                                                                                                                                                                                                                                                                                                                                                                                                                  |
|--------------------------------------------------------------------------------------------------------------------------------------------------------------------------------------------------------------------------------------------------------------------------------------------------------------------------------------------------------------------------------------------------------------------------------------------------------------------------------------------------------------------------------------------------------------------------------------------------------------------------------------------------------------------------------|-------------------------------------------------------------------------------------------------------------------------------------------------------------------------------------------------|------------------------------------------------------------------------------------------|----------------------------------------------------------------------------------------------------------------------------------------------------------------------------------------------------------------------------------------------------------------------------------------------------------------------------------------------------------------------------------------------------------------------------------------------------------------------------------------------------------------------------------------------------------------------------------------------------------------------------------------------------------------------------------------------------------------------------------------------------------------------------------------------------------------------------------|
| see above                                                                                                                                                                                                                                                                                                                                                                                                                                                                                                                                                                                                                                                                      | deCODE genetics                                                                                                                                                                                 | deCODE genetics                                                                          | Daniel F Gudbjartsson; Agnar Helgason; Hakon Jonsson; Olafur T Magnusson; Pall Melsted; Gudmundur L Norddahl; Jona Saemundsdottir; Asgeir Sigurdsson; Patrick Sulem; Arna B Agustsdottir; Hannes Eggertsson; Berglind Eiriksdothir; Run Fridriksdottir; Elisabet E Gardarsdottir; Gudmundur Georgsson; Olafia S Gretarsdottir; Kjartan R Gudmundsson; Thora R Gunnarsdottir; Arnaldur Gylfason; Hilma Holm; Brynjar O Jenson; Aslaug Jonasdottir; Kamilla S Josefsdottir; Thordur Kristjansson; Droplaug N Magnusdottir; Solvi Rognvaldsson; Louise le Roux; Gudrun Sigmundsdottir; Gardar Sveinbjornsson; Kristin E Sveinsdottir; Maney Sveinsdottir; Emil A Thorarensen; Bjarni Thorbjornsson; Gisli Masson; Ingileif Jonsdottir; Alma Moller; Thorolfur Gudnason; Karl G Kristinsson; Unnur Thorsteinsdottir; Kari Stefansson |
| EPI_ISL_828175                                                                                                                                                                                                                                                                                                                                                                                                                                                                                                                                                                                                                                                                 | The National University Hospital of Iceland                                                                                                                                                     | deCODE genetics                                                                          | Daniel F Gudbjartsson; Agnar Helgason; Hakon Jonsson; Olafur T Magnusson; Pall Melsted; Gudmundur L Norddahl; Jona Saemundsdottir; Asgeir Sigurdsson; Patrick Sulem; Arna B Agustsdottir; Hannes Eggertsson; Berglind Eiriksdothir; Run Fridriksdottir; Elisabet E Gardarsdottir; Gudmundur Georgsson; Olafia S Gretarsdottir; Kjartan R Gudmundsson; Thora R Gunnarsdottir; Arnaldur Gylfason; Hilma Holm; Brynjar O Jenson; Aslaug Jonasdottir; Kamilla S Josefsdottir; Thordur Kristjansson; Droplaug N Magnusdottir; Solvi Rognvaldsson; Louise le Roux; Gudrun Sigmundsdottir; Gardar Sveinbjornsson; Kristin E Sveinsdottir; Maney Sveinsdottir; Emil A Thorarensen; Bjarni Thorbjornsson; Gisli Masson; Ingileif Jonsdottir; Alma Moller; Thorolfur Gudnason; Karl G Kristinsson; Unnur Thorsteinsdottir; Kari Stefansson |
| EPI_ISL_828179, EPI_ISL_828208, EPI_ISL_828233, EPI_ISL_828249, EPI_ISL_828409, EPI_ISL_828520, EPI_ISL_828920, EPI_ISL_828947, EPI_ISL_828964, EPI_ISL_829052, EPI_ISL_829137, EPI_ISL_829145, EPI_ISL_829150, EPI_ISL_829151, EPI_ISL_829176, EPI_ISL_829177, EPI_ISL_829182, EPI_ISL_829185, EPI_ISL_829198, EPI_ISL_829211, EPI_ISL_829343, EPI_ISL_829344, EPI_ISL_829345, EPI_ISL_829346, EPI_ISL_829347, EPI_ISL_829368, EPI_ISL_829380, EPI_ISL_829390, EPI_ISL_829437, EPI_ISL_829587, EPI_ISL_829588, EPI_ISL_829589, EPI_ISL_829591, EPI_ISL_829684, EPI_ISL_829728, EPI_ISL_829729, EPI_ISL_829730, EPI_ISL_829731, EPI_ISL_829852, EPI_ISL_829853, EPI_ISL_829854 |                                                                                                                                                                                                 |                                                                                          |                                                                                                                                                                                                                                                                                                                                                                                                                                                                                                                                                                                                                                                                                                                                                                                                                                  |
| see above                                                                                                                                                                                                                                                                                                                                                                                                                                                                                                                                                                                                                                                                      | deCODE genetics                                                                                                                                                                                 | deCODE genetics                                                                          | Daniel F Gudbjartsson; Agnar Helgason; Hakon Jonsson; Olafur T Magnusson; Pall Melsted; Gudmundur L Norddahl; Jona Saemundsdottir; Asgeir Sigurdsson; Patrick Sulem; Arna B Agustsdottir; Hannes Eggertsson; Berglind Eiriksdothir; Run Fridriksdottir; Elisabet E Gardarsdottir; Gudmundur Georgsson; Olafia S Gretarsdottir; Kjartan R Gudmundsson; Thora R Gunnarsdottir; Arnaldur Gylfason; Hilma Holm; Brynjar O Jenson; Aslaug Jonasdottir; Kamilla S Josefsdottir; Thordur Kristjansson; Droplaug N Magnusdottir; Solvi Rognvaldsson; Louise le Roux; Gudrun Sigmundsdottir; Gardar Sveinbjornsson; Kristin E Sveinsdottir; Maney Sveinsdottir; Emil A Thorarensen; Bjarni Thorbjornsson; Gisli Masson; Ingileif Jonsdottir; Alma Moller; Thorolfur Gudnason; Karl G Kristinsson; Unnur Thorsteinsdottir; Kari Stefansson |
| EPI_ISL_829860                                                                                                                                                                                                                                                                                                                                                                                                                                                                                                                                                                                                                                                                 | The National University Hospital of Iceland                                                                                                                                                     | deCODE genetics                                                                          | Daniel F Gudbjartsson; Agnar Helgason; Hakon Jonsson; Olafur T Magnusson; Pall Melsted; Gudmundur L Norddahl; Jona Saemundsdottir; Asgeir Sigurdsson; Patrick Sulem; Arna B Agustsdottir; Hannes Eggertsson; Berglind Eiriksdothir; Run Fridriksdottir; Elisabet E Gardarsdottir; Gudmundur Georgsson; Olafia S Gretarsdottir; Kjartan R Gudmundsson; Thora R Gunnarsdottir; Arnaldur Gylfason; Hilma Holm; Brynjar O Jenson; Aslaug Jonasdottir; Kamilla S Josefsdottir; Thordur Kristjansson; Droplaug N Magnusdottir; Solvi Rognvaldsson; Louise le Roux; Gudrun Sigmundsdottir; Gardar Sveinbjornsson; Kristin E Sveinsdottir; Maney Sveinsdottir; Emil A Thorarensen; Bjarni Thorbjornsson; Gisli Masson; Ingileif Jonsdottir; Alma Moller; Thorolfur Gudnason; Karl G Kristinsson; Unnur Thorsteinsdottir; Kari Stefansson |
| EPI_ISL_829905, EPI_ISL_829906, EPI_ISL_829908, EPI_ISL_829976, EPI_ISL_829980, EPI_ISL_829983                                                                                                                                                                                                                                                                                                                                                                                                                                                                                                                                                                                 | deCODE genetics                                                                                                                                                                                 | deCODE genetics                                                                          | Daniel F Gudbjartsson; Agnar Helgason; Hakon Jonsson; Olafur T Magnusson; Pall Melsted; Gudmundur L Norddahl; Jona Saemundsdottir; Asgeir Sigurdsson; Patrick Sulem; Arna B Agustsdottir; Hannes Eggertsson; Berglind Eiriksdothir; Run Fridriksdottir; Elisabet E Gardarsdottir; Gudmundur Georgsson; Olafia S Gretarsdottir; Kjartan R Gudmundsson; Thora R Gunnarsdottir; Arnaldur Gylfason; Hilma Holm; Brynjar O Jenson; Aslaug Jonasdottir; Kamilla S Josefsdottir; Thordur Kristjansson; Droplaug N Magnusdottir; Solvi Rognvaldsson; Louise le Roux; Gudrun Sigmundsdottir; Gardar Sveinbjornsson; Kristin E Sveinsdottir; Maney Sveinsdottir; Emil A Thorarensen; Bjarni Thorbjornsson; Gisli Masson; Ingileif Jonsdottir; Alma Moller; Thorolfur Gudnason; Karl G Kristinsson; Unnur Thorsteinsdottir; Kari Stefansson |
| EPI_ISL_830102, EPI_ISL_830103                                                                                                                                                                                                                                                                                                                                                                                                                                                                                                                                                                                                                                                 | The National University Hospital of Iceland                                                                                                                                                     | deCODE genetics                                                                          | Daniel F Gudbjartsson; Agnar Helgason; Hakon Jonsson; Olafur T Magnusson; Pall Melsted; Gudmundur L Norddahl; Jona Saemundsdottir; Asgeir Sigurdsson; Patrick Sulem; Arna B Agustsdottir; Hannes Eggertsson; Berglind Eiriksdothir; Run Fridriksdottir; Elisabet E Gardarsdottir; Gudmundur Georgsson; Olafia S Gretarsdottir; Kjartan R Gudmundsson; Thora R Gunnarsdottir; Arnaldur Gylfason; Hilma Holm; Brynjar O Jenson; Aslaug Jonasdottir; Kamilla S Josefsdottir; Thordur Kristjansson; Droplaug N Magnusdottir; Solvi Rognvaldsson; Louise le Roux; Gudrun Sigmundsdottir; Gardar Sveinbjornsson; Kristin E Sveinsdottir; Maney Sveinsdottir; Emil A Thorarensen; Bjarni Thorbjornsson; Gisli Masson; Ingileif Jonsdottir; Alma Moller; Thorolfur Gudnason; Karl G Kristinsson; Unnur Thorsteinsdottir; Kari Stefansson |
| EPI_ISL_830157, EPI_ISL_830160, EPI_ISL_830174, EPI_ISL_830175, EPI_ISL_830197                                                                                                                                                                                                                                                                                                                                                                                                                                                                                                                                                                                                 | deCODE genetics                                                                                                                                                                                 | deCODE genetics                                                                          | Daniel F Gudbjartsson; Agnar Helgason; Hakon Jonsson; Olafur T Magnusson; Pall Melsted; Gudmundur L Norddahl; Jona Saemundsdottir; Asgeir Sigurdsson; Patrick Sulem; Arna B Agustsdottir; Hannes Eggertsson; Berglind Eiriksdothir; Run Fridriksdottir; Elisabet E Gardarsdottir; Gudmundur Georgsson; Olafia S Gretarsdottir; Kjartan R Gudmundsson; Thora R Gunnarsdottir; Arnaldur Gylfason; Hilma Holm; Brynjar O Jenson; Aslaug Jonasdottir; Kamilla S Josefsdottir; Thordur Kristjansson; Droplaug N Magnusdottir; Solvi Rognvaldsson; Louise le Roux; Gudrun Sigmundsdottir; Gardar Sveinbjornsson; Kristin E Sveinsdottir; Maney Sveinsdottir; Emil A Thorarensen; Bjarni Thorbjornsson; Gisli Masson; Ingileif Jonsdottir; Alma Moller; Thorolfur Gudnason; Karl G Kristinsson; Unnur Thorsteinsdottir; Kari Stefansson |
| EPI_ISL_830235, EPI_ISL_830237                                                                                                                                                                                                                                                                                                                                                                                                                                                                                                                                                                                                                                                 | The National University Hospital of Iceland                                                                                                                                                     | deCODE genetics                                                                          | Daniel F Gudbjartsson; Agnar Helgason; Hakon Jonsson; Olafur T Magnusson; Pall Melsted; Gudmundur L Norddahl; Jona Saemundsdottir; Asgeir Sigurdsson; Patrick Sulem; Arna B Agustsdottir; Hannes Eggertsson; Berglind Eiriksdothir; Run Fridriksdottir; Elisabet E Gardarsdottir; Gudmundur Georgsson; Olafia S Gretarsdottir; Kjartan R Gudmundsson; Thora R Gunnarsdottir; Arnaldur Gylfason; Hilma Holm; Brynjar O Jenson; Aslaug Jonasdottir; Kamilla S Josefsdottir; Thordur Kristjansson; Droplaug N Magnusdottir; Solvi Rognvaldsson; Louise le Roux; Gudrun Sigmundsdottir; Gardar Sveinbjornsson; Kristin E Sveinsdottir; Maney Sveinsdottir; Emil A Thorarensen; Bjarni Thorbjornsson; Gisli Masson; Ingileif Jonsdottir; Alma Moller; Thorolfur Gudnason; Karl G Kristinsson; Unnur Thorsteinsdottir; Kari Stefansson |
| EPI_ISL_831032, EPI_ISL_831202, EPI_ISL_831203, EPI_ISL_831204, EPI_ISL_831205, EPI_ISL_831206, EPI_ISL_831207, EPI_ISL_831208, EPI_ISL_831209, EPI_ISL_831210, EPI_ISL_831211, EPI_ISL_831212, EPI_ISL_831245, EPI_ISL_831246                                                                                                                                                                                                                                                                                                                                                                                                                                                 |                                                                                                                                                                                                 |                                                                                          |                                                                                                                                                                                                                                                                                                                                                                                                                                                                                                                                                                                                                                                                                                                                                                                                                                  |
| see above                                                                                                                                                                                                                                                                                                                                                                                                                                                                                                                                                                                                                                                                      | Hospital Universitario La Paz (Madrid)                                                                                                                                                          | SeqCOVID-SPAIN consortium/IBV(CSIC)                                                      | María Rodríguez-Tejedor, Elias Dahdouh, Fernando Lázaro-Perona, Jesús Mingorance and SeqCOVID-SPAIN consortium                                                                                                                                                                                                                                                                                                                                                                                                                                                                                                                                                                                                                                                                                                                   |
| EPI_ISL_831753, EPI_ISL_831756, EPI_ISL_831803, EPI_ISL_831804, EPI_ISL_831807, EPI_ISL_831808, EPI_ISL_831809, EPI_ISL_831810, EPI_ISL_831811, EPI_ISL_831823, EPI_ISL_831824, EPI_ISL_831825, EPI_ISL_831826, EPI_ISL_831827, EPI_ISL_831828, EPI_ISL_831829, EPI_ISL_831830, EPI_ISL_831831, EPI_ISL_831832, EPI_ISL_831833, EPI_ISL_831834, EPI_ISL_831835, EPI_ISL_831843, EPI_ISL_831856, EPI_ISL_831858                                                                                                                                                                                                                                                                 |                                                                                                                                                                                                 |                                                                                          |                                                                                                                                                                                                                                                                                                                                                                                                                                                                                                                                                                                                                                                                                                                                                                                                                                  |
| see above                                                                                                                                                                                                                                                                                                                                                                                                                                                                                                                                                                                                                                                                      | United States Air Force School of Aerospace Medicine                                                                                                                                            | United States Air Force School of Aerospace Medicine                                     | Anthony Fries, Jennifer Meyer, William Gruner, Amanda Javorina, Sarah Purves, Clarise Starr, Elizabeth Macias                                                                                                                                                                                                                                                                                                                                                                                                                                                                                                                                                                                                                                                                                                                    |
| EPI_ISL_832038                                                                                                                                                                                                                                                                                                                                                                                                                                                                                                                                                                                                                                                                 | Wyoming Public Health Laboratory                                                                                                                                                                | Wyoming Public Health Laboratory                                                         | Noah Hull, Taylor Fearing, Lynette Gumbleton, Channing Weber, Ashley Norberg, Bailey Bowcutt, and Wanda Manley                                                                                                                                                                                                                                                                                                                                                                                                                                                                                                                                                                                                                                                                                                                   |
| EPI_ISL_832146, EPI_ISL_832147, EPI_ISL_832148, EPI_ISL_832149, EPI_ISL_832150, EPI_ISL_832151, EPI_ISL_832152, EPI_ISL_832153, EPI_ISL_832154, EPI_ISL_832155, EPI_ISL_832156, EPI_ISL_832157, EPI_ISL_832158, EPI_ISL_832159                                                                                                                                                                                                                                                                                                                                                                                                                                                 |                                                                                                                                                                                                 |                                                                                          |                                                                                                                                                                                                                                                                                                                                                                                                                                                                                                                                                                                                                                                                                                                                                                                                                                  |
| see above                                                                                                                                                                                                                                                                                                                                                                                                                                                                                                                                                                                                                                                                      | Hospital                                                                                                                                                                                        | National Reference Center for Viruses of Respiratory Infections, Institut Pasteur, Paris | Marion Barbet, Sylvie Behillil, Méline Bizard, Angela Brisebarre, Camille Capel, Etienne Simon-Lorière, Vincent Enouf, Maud Vanpeene, Sylvie van der Werf, Léa Pilorge                                                                                                                                                                                                                                                                                                                                                                                                                                                                                                                                                                                                                                                           |
| EPI_ISL_833162                                                                                                                                                                                                                                                                                                                                                                                                                                                                                                                                                                                                                                                                 | Lab LOC - Itapeperica da Serra                                                                                                                                                                  | Instituto Adolfo Lutz, Interdisciplinary Procedures Center, Strategic Laboratory         | Claudio Tavares Sacchi, Claudia Regina Gonçalves, Erica Valessa Ramos Gomes, Karoline Rodrigues Campos                                                                                                                                                                                                                                                                                                                                                                                                                                                                                                                                                                                                                                                                                                                           |
| EPI_ISL_833163                                                                                                                                                                                                                                                                                                                                                                                                                                                                                                                                                                                                                                                                 | Instituto Adolfo Lutz - Regional de Marília                                                                                                                                                     | Instituto Adolfo Lutz, Interdisciplinary Procedures Center, Strategic Laboratory         | Claudio Tavares Sacchi, Claudia Regina Gonçalves, Erica Valessa Ramos Gomes, Karoline Rodrigues Campos                                                                                                                                                                                                                                                                                                                                                                                                                                                                                                                                                                                                                                                                                                                           |
| EPI_ISL_833458, EPI_ISL_833463, EPI_ISL_833471, EPI_ISL_833475, EPI_ISL_833476, EPI_ISL_833479                                                                                                                                                                                                                                                                                                                                                                                                                                                                                                                                                                                 | CHU Purpan - Laboratoire de Virologie - Institut Fédératif de Biologie                                                                                                                          | CHU Purpan - Laboratoire de Virologie - Institut Fédératif de Biologie                   | Latour J., Ranger N., Dubois M., Carcenac R., Harter A., Boyer P., Tremeaux P., Izopet J.                                                                                                                                                                                                                                                                                                                                                                                                                                                                                                                                                                                                                                                                                                                                        |
| EPI_ISL_838055, EPI_ISL_838058, EPI_ISL_838059                                                                                                                                                                                                                                                                                                                                                                                                                                                                                                                                                                                                                                 | West of Scotland Specialist Virology Centre, NHSGGC / MRC-University of Glasgow Centre for Virus Research                                                                                       | COVID-19 Genomics UK (COG-UK) Consortium                                                 | Ana da Silva Filipe, Natasha Johnson, Kathy Smollett, Daniel Mair, Stephen Carmichael, Alice Broos, Lily Tong, Jenna Nichols, Kyriaki Nomikou; Sarah McDonald; Richard Orton, Joseph Hughes, Sreenu Vattipally, David L Robertson; Alasdair MacLean, Rory Gunson; Sharif Shaaban, Matthew Holden; Rachel Blacow, Guy Mollett, Kathy Li, James Shepherd, Antonia Ho, Emma Thomson                                                                                                                                                                                                                                                                                                                                                                                                                                                 |
| EPI_ISL_838282                                                                                                                                                                                                                                                                                                                                                                                                                                                                                                                                                                                                                                                                 | Virology Department, Royal Infirmary of Edinburgh, NHS Lothian / School of Biological Sciences, University of Edinburgh / Institute of Genetics and Molecular Medicine, University of Edinburgh | COVID-19 Genomics UK (COG-UK) Consortium                                                 | McHugh M, Dewar R, Rooke S, Gallagher M, Balcaza C, O'Toole Á, Scher E, Hill V, McCrone JT, Colquhoun R, Yu X, Jackson B, Rambaut A, Williams TC, Templeton K                                                                                                                                                                                                                                                                                                                                                                                                                                                                                                                                                                                                                                                                    |
| EPI_ISL_840192, EPI_ISL_840193, EPI_ISL_840195, EPI_ISL_840198, EPI_ISL_840199, EPI_ISL_840204, EPI_ISL_840205, EPI_ISL_840210, EPI_ISL_840214, EPI_ISL_840215, EPI_ISL_840216                                                                                                                                                                                                                                                                                                                                                                                                                                                                                                 |                                                                                                                                                                                                 |                                                                                          |                                                                                                                                                                                                                                                                                                                                                                                                                                                                                                                                                                                                                                                                                                                                                                                                                                  |
| see above                                                                                                                                                                                                                                                                                                                                                                                                                                                                                                                                                                                                                                                                      | Oxford Viromics, NDM, University of Oxford; Oxford University                                                                                                                                   | COVID-19 Genomics UK (COG-UK) Consortium                                                 | Tanya Golubchik, David Bonsall, George Macintyre, Amy Trebes, Mariateresa de Cesare, Catrin Moore, Alex Mobbs, Anita Justice, Robert Shaw, Monique                                                                                                                                                                                                                                                                                                                                                                                                                                                                                                                                                                                                                                                                               |

|                                                                                                                                                                                                                                                                                                                                                                                                                                                                                                                                                                                                                                                                                                                                                                                                                                                                                                                                                                                                                                                                                                                                                                                                                                                                                                |                                                         |                                                                                                                                                    |                                                                                                                                                                                                                                                                                                                                                                                                                                                                                     |
|------------------------------------------------------------------------------------------------------------------------------------------------------------------------------------------------------------------------------------------------------------------------------------------------------------------------------------------------------------------------------------------------------------------------------------------------------------------------------------------------------------------------------------------------------------------------------------------------------------------------------------------------------------------------------------------------------------------------------------------------------------------------------------------------------------------------------------------------------------------------------------------------------------------------------------------------------------------------------------------------------------------------------------------------------------------------------------------------------------------------------------------------------------------------------------------------------------------------------------------------------------------------------------------------|---------------------------------------------------------|----------------------------------------------------------------------------------------------------------------------------------------------------|-------------------------------------------------------------------------------------------------------------------------------------------------------------------------------------------------------------------------------------------------------------------------------------------------------------------------------------------------------------------------------------------------------------------------------------------------------------------------------------|
| Hospitals; Basingstoke and North Hampshire Hospital                                                                                                                                                                                                                                                                                                                                                                                                                                                                                                                                                                                                                                                                                                                                                                                                                                                                                                                                                                                                                                                                                                                                                                                                                                            |                                                         | Andersson, Timothy Peto, Emma Wise, Nathan Moore, Jessica Lynch, Nick Cortes, Matilde Mori, Stephen Kidd, David Buck, John Todd, Christophe Fraser |                                                                                                                                                                                                                                                                                                                                                                                                                                                                                     |
| EPI_ISL_842931, EPI_ISL_842935, EPI_ISL_842941, EPI_ISL_842949, EPI_ISL_842953, EPI_ISL_842966, EPI_ISL_842968, EPI_ISL_842970, EPI_ISL_842975, EPI_ISL_842981, EPI_ISL_842992, EPI_ISL_842993, EPI_ISL_843005, EPI_ISL_843015, EPI_ISL_843017, EPI_ISL_843027, EPI_ISL_843041, EPI_ISL_843043                                                                                                                                                                                                                                                                                                                                                                                                                                                                                                                                                                                                                                                                                                                                                                                                                                                                                                                                                                                                 | see above                                               | Barts Health NHS Trust                                                                                                                             | COVID-19 Genomics UK (COG-UK) Consortium                                                                                                                                                                                                                                                                                                                                                                                                                                            |
| EPI_ISL_844252, EPI_ISL_844267, EPI_ISL_844288, EPI_ISL_844289, EPI_ISL_844290, EPI_ISL_844291, EPI_ISL_844292, EPI_ISL_844293, EPI_ISL_844294, EPI_ISL_844462, EPI_ISL_844463, EPI_ISL_844464, EPI_ISL_844465, EPI_ISL_844466, EPI_ISL_844467, EPI_ISL_844468, EPI_ISL_844469, EPI_ISL_844470, EPI_ISL_844471, EPI_ISL_844472, EPI_ISL_844473, EPI_ISL_844474, EPI_ISL_844475, EPI_ISL_844476, EPI_ISL_844477, EPI_ISL_844479, EPI_ISL_844480, EPI_ISL_844481, EPI_ISL_844482, EPI_ISL_844483, EPI_ISL_844484, EPI_ISL_844485, EPI_ISL_844486, EPI_ISL_844489, EPI_ISL_844490, EPI_ISL_844491, EPI_ISL_844492, EPI_ISL_844494, EPI_ISL_844495, EPI_ISL_844496, EPI_ISL_844497, EPI_ISL_844498, EPI_ISL_844502, EPI_ISL_844503, EPI_ISL_844504, EPI_ISL_844505, EPI_ISL_844506, EPI_ISL_844507, EPI_ISL_844508, EPI_ISL_844509, EPI_ISL_844511, EPI_ISL_844512, EPI_ISL_844513, EPI_ISL_844514, EPI_ISL_844515, EPI_ISL_844516, EPI_ISL_844517, EPI_ISL_844518, EPI_ISL_844519, EPI_ISL_844520, EPI_ISL_844521, EPI_ISL_844522, EPI_ISL_844524, EPI_ISL_844525, EPI_ISL_844526, EPI_ISL_844527, EPI_ISL_844529, EPI_ISL_844530, EPI_ISL_844531, EPI_ISL_844532, EPI_ISL_844533, EPI_ISL_844534, EPI_ISL_844535, EPI_ISL_844536, EPI_ISL_844537, EPI_ISL_844538, EPI_ISL_844539, EPI_ISL_844540 | see above                                               | Department of Virus and Microbiological Special Diagnostics, Statens Serum Institut, Copenhagen, Denmark                                           | Albertsen Lab, Department of Chemistry and Bioscience, Aalborg University, Denmark                                                                                                                                                                                                                                                                                                                                                                                                  |
| EPI_ISL_846771                                                                                                                                                                                                                                                                                                                                                                                                                                                                                                                                                                                                                                                                                                                                                                                                                                                                                                                                                                                                                                                                                                                                                                                                                                                                                 | University of Michigan Clinical Microbiology Laboratory | Lauring Lab, University of Michigan, Department of Microbiology and Immunology                                                                     | Danish Covid-19 Genome Consortium                                                                                                                                                                                                                                                                                                                                                                                                                                                   |
| EPI_ISL_847803, EPI_ISL_847808, EPI_ISL_847809, EPI_ISL_847810, EPI_ISL_847815                                                                                                                                                                                                                                                                                                                                                                                                                                                                                                                                                                                                                                                                                                                                                                                                                                                                                                                                                                                                                                                                                                                                                                                                                 | California Department of Public Health                  | Chiu Laboratory, University of California, San Francisco                                                                                           | Charles Chiu, Xiangding (Wayne) Deng, Candace Wang, Brian Bushnell, Scot Federman, Jill Hacker, Debra Wadford                                                                                                                                                                                                                                                                                                                                                                       |
| EPI_ISL_848439, EPI_ISL_848527, EPI_ISL_848528, EPI_ISL_848529, EPI_ISL_848530, EPI_ISL_848531, EPI_ISL_848532                                                                                                                                                                                                                                                                                                                                                                                                                                                                                                                                                                                                                                                                                                                                                                                                                                                                                                                                                                                                                                                                                                                                                                                 | Illinois Department of Public Health                    | Gagnon Lab, Southern Illinois University                                                                                                           | Keith Gagnon                                                                                                                                                                                                                                                                                                                                                                                                                                                                        |
| EPI_ISL_848715, EPI_ISL_848716, EPI_ISL_848727, EPI_ISL_848755, EPI_ISL_848757, EPI_ISL_848772, EPI_ISL_848773, EPI_ISL_848774, EPI_ISL_848782, EPI_ISL_848805, EPI_ISL_848807, EPI_ISL_848809                                                                                                                                                                                                                                                                                                                                                                                                                                                                                                                                                                                                                                                                                                                                                                                                                                                                                                                                                                                                                                                                                                 | see above                                               | Florida Bureau of Public Health Laboratories                                                                                                       | Sarah Schmedes, Jason Blanton                                                                                                                                                                                                                                                                                                                                                                                                                                                       |
| EPI_ISL_849558                                                                                                                                                                                                                                                                                                                                                                                                                                                                                                                                                                                                                                                                                                                                                                                                                                                                                                                                                                                                                                                                                                                                                                                                                                                                                 | Washington State Department of Health                   | Seattle Flu Study                                                                                                                                  | Deborah A. Nickerson, Chris D. Frazar, Jover Lee, Benjamin Pelle, Matthew Richardson, Amanda Adler, Elisabeth Brandstetter, Peter D. Han, Kairsten Fay, Misja Ilcisin, Kirsten Lacombe, Thomas R. Sibley, Melissa Truong, Caitlin R. Wolf, Romesh Gautom, Geoff Melly, Brian Hiatt, Philip Dykema, Scott Lindquist, Michael Boeckh, Janet A. Englund, Michael Famulare, Barry R. Lutz, Mark J. Rieder, Lea M. Starita, Matthew Thompson, Helen Y. Chu, Jay Shendure, Trevor Bedford |
| EPI_ISL_850041, EPI_ISL_850047, EPI_ISL_850068, EPI_ISL_850088, EPI_ISL_850098, EPI_ISL_850100, EPI_ISL_850102, EPI_ISL_850110, EPI_ISL_850114, EPI_ISL_850127, EPI_ISL_850130, EPI_ISL_850176                                                                                                                                                                                                                                                                                                                                                                                                                                                                                                                                                                                                                                                                                                                                                                                                                                                                                                                                                                                                                                                                                                 | see above                                               | Renegade                                                                                                                                           | CZB Cliahub Consortium                                                                                                                                                                                                                                                                                                                                                                                                                                                              |
| EPI_ISL_852633, EPI_ISL_852634, EPI_ISL_852635, EPI_ISL_852636, EPI_ISL_852637, EPI_ISL_852638, EPI_ISL_852639, EPI_ISL_852640, EPI_ISL_852641, EPI_ISL_852642, EPI_ISL_852643, EPI_ISL_852644, EPI_ISL_852645, EPI_ISL_852646, EPI_ISL_852647, EPI_ISL_852648, EPI_ISL_852649                                                                                                                                                                                                                                                                                                                                                                                                                                                                                                                                                                                                                                                                                                                                                                                                                                                                                                                                                                                                                 | see above                                               | Institute of Virology, Medical Center, University of Freiburg, Freiburg, Germany                                                                   | Jonas Fuchs, Lisa Kern, Sandra Reuter, Hajo Grundmann, Marcus Panning                                                                                                                                                                                                                                                                                                                                                                                                               |
| EPI_ISL_852845, EPI_ISL_852846, EPI_ISL_852847, EPI_ISL_852848, EPI_ISL_852850, EPI_ISL_852856, EPI_ISL_852864, EPI_ISL_852865                                                                                                                                                                                                                                                                                                                                                                                                                                                                                                                                                                                                                                                                                                                                                                                                                                                                                                                                                                                                                                                                                                                                                                 | Toronto Invasive Bacterial Diseases Network             | Ontario Institute for Cancer Research                                                                                                              | Allison McGeer, Patryk Aftanas, Angel Li, Kuganya Nirmalarajah, Samira Mubareka, Ilincia Lungu, Lubaina Kothari, Bernard Lam, Paul Krzyzanowski, Michael Laszloffy, Lawrence E. Heisler, Richard de Borja, Jared T. Simpson                                                                                                                                                                                                                                                         |
| EPI_ISL_857496, EPI_ISL_857497, EPI_ISL_857498, EPI_ISL_857499, EPI_ISL_857501, EPI_ISL_857502, EPI_ISL_857503, EPI_ISL_857513                                                                                                                                                                                                                                                                                                                                                                                                                                                                                                                                                                                                                                                                                                                                                                                                                                                                                                                                                                                                                                                                                                                                                                 | Swiss National Reference Centre for Influenza           | Swiss National Reference Centre for Influenza                                                                                                      | Ana Rita Goncalves, Samuel Cordey, Laurent Kaiser, Lorenzo Cerutti, Henri Pegeot, Melyssa Elies, Keith Harshman, Ioannis Xenarios, Emmanouil Dermitzakis                                                                                                                                                                                                                                                                                                                            |
| EPI_ISL_857520, EPI_ISL_857521, EPI_ISL_857522, EPI_ISL_857523, EPI_ISL_857524, EPI_ISL_857525, EPI_ISL_857526, EPI_ISL_857527, EPI_ISL_857540                                                                                                                                                                                                                                                                                                                                                                                                                                                                                                                                                                                                                                                                                                                                                                                                                                                                                                                                                                                                                                                                                                                                                 | Swiss National Reference Centre for Influenza           | Swiss National Reference Centre for Influenza                                                                                                      | Tim Roloff, Ana Rita Gonçalves, Madlen Stange, Helena MB Seth-Smith, Alfredo Mari, Karoline Leuzinger, Julia Bielicki, Manuel Battegay, Hans Hirsch, Laurent Kaiser, Adrian Egli                                                                                                                                                                                                                                                                                                    |
| EPI_ISL_859554, EPI_ISL_859556, EPI_ISL_859557, EPI_ISL_859558, EPI_ISL_859559, EPI_ISL_859560                                                                                                                                                                                                                                                                                                                                                                                                                                                                                                                                                                                                                                                                                                                                                                                                                                                                                                                                                                                                                                                                                                                                                                                                 | Lighthouse Lab in Cambridge                             | Wellcome Sanger Institute for the COVID-19 Genomics UK (COG-UK) Consortium                                                                         | Rob Howes, The Lighthouse Lab in Cambridge and Alex Alderton, Roberto Amato, Sonia Goncalves, Ewan Harrison, David K. Jackson, Ian Johnston, Dominic Kwiatkowski, Cordelia Langford, John Sillitoe on behalf of the Wellcome Sanger Institute COVID-19 Surveillance Team                                                                                                                                                                                                            |
| EPI_ISL_859846, EPI_ISL_859847, EPI_ISL_859848, EPI_ISL_859849, EPI_ISL_859850, EPI_ISL_859851, EPI_ISL_859853, EPI_ISL_859854, EPI_ISL_859855, EPI_ISL_859856, EPI_ISL_859857, EPI_ISL_859858, EPI_ISL_859859, EPI_ISL_859860, EPI_ISL_859861, EPI_ISL_859862, EPI_ISL_859864, EPI_ISL_859866, EPI_ISL_859867, EPI_ISL_859868, EPI_ISL_859869, EPI_ISL_859870, EPI_ISL_859871, EPI_ISL_859872, EPI_ISL_859873, EPI_ISL_859874, EPI_ISL_859875, EPI_ISL_859876, EPI_ISL_859877, EPI_ISL_859879, EPI_ISL_859880, EPI_ISL_859881, EPI_ISL_859882, EPI_ISL_859883, EPI_ISL_859884, EPI_ISL_859885, EPI_ISL_859886, EPI_ISL_859887, EPI_ISL_859895, EPI_ISL_859896, EPI_ISL_859897, EPI_ISL_859898, EPI_ISL_859899, EPI_ISL_859900, EPI_ISL_859901, EPI_ISL_859902, EPI_ISL_859903, EPI_ISL_859904, EPI_ISL_859905, EPI_ISL_859907, EPI_ISL_859908, EPI_ISL_859909, EPI_ISL_859910, EPI_ISL_859911, EPI_ISL_859912, EPI_ISL_859913, EPI_ISL_859916, EPI_ISL_859917, EPI_ISL_859918, EPI_ISL_859919, EPI_ISL_859920, EPI_ISL_859921, EPI_ISL_859922, EPI_ISL_859923, EPI_ISL_859924, EPI_ISL_859925, EPI_ISL_859926, EPI_ISL_859927, EPI_ISL_859928, EPI_ISL_859929, EPI_ISL_859930, EPI_ISL_859931, EPI_ISL_859932, EPI_ISL_859933, EPI_ISL_859934, EPI_ISL_859935                                 | see above                                               | BTC, Khalifa University                                                                                                                            | Al Safar et al                                                                                                                                                                                                                                                                                                                                                                                                                                                                      |
| EPI_ISL_860123, EPI_ISL_860134, EPI_ISL_860152, EPI_ISL_860153, EPI_ISL_860154, EPI_ISL_860156, EPI_ISL_860161, EPI_ISL_860162, EPI_ISL_860163, EPI_ISL_860164, EPI_ISL_860165, EPI_ISL_860166, EPI_ISL_860167, EPI_ISL_860169, EPI_ISL_860171, EPI_ISL_860173                                                                                                                                                                                                                                                                                                                                                                                                                                                                                                                                                                                                                                                                                                                                                                                                                                                                                                                                                                                                                                 | see above                                               | Keio University School of Medicine                                                                                                                 | Kenjiro Kosaki, Yuka Iwasaki, Hirotugu Ishizu, Haruhiko Siomi, Kodai Abe                                                                                                                                                                                                                                                                                                                                                                                                            |
| EPI_ISL_860804                                                                                                                                                                                                                                                                                                                                                                                                                                                                                                                                                                                                                                                                                                                                                                                                                                                                                                                                                                                                                                                                                                                                                                                                                                                                                 | WHO/Minsk                                               | Charité Universitätsmedizin Berlin, Institut für Virologie                                                                                         | Victor M Corman, Barbara Mühlemann, Jörn Beheim-Schwarzbach, Talitha Veith, Julia Tesch, Tobias Bleicker, Julia Schneider, Shmialiova Natallia, Sivets Natallia, Terry Jones, Christian Drosten                                                                                                                                                                                                                                                                                     |
| EPI_ISL_861881, EPI_ISL_861882, EPI_ISL_861883, EPI_ISL_861886, EPI_ISL_861887, EPI_ISL_861888, EPI_ISL_861894, EPI_ISL_861903, EPI_ISL_861904, EPI_ISL_861908, EPI_ISL_861909                                                                                                                                                                                                                                                                                                                                                                                                                                                                                                                                                                                                                                                                                                                                                                                                                                                                                                                                                                                                                                                                                                                 | see above                                               | LATE - Laboratório de Técnicas Especiais - Hospital Israelita Albert Einstein                                                                      | Deyvid Amgarten, Fernanda de Mello Malta, Raquel Riyuzo, Ana Paula Moreira Salles, Pedro Henrique Sebe Rodrigues, João Renato Rebelo Pinho                                                                                                                                                                                                                                                                                                                                          |
| EPI_ISL_862076                                                                                                                                                                                                                                                                                                                                                                                                                                                                                                                                                                                                                                                                                                                                                                                                                                                                                                                                                                                                                                                                                                                                                                                                                                                                                 | National Influenza Center, Virology Department          | National Influenza Center                                                                                                                          | NZ Shafiei Jandaghi, V Salimi, A Nejati, K Sadeghi, J Yavarian, N Ghavvami, F Ajaminejad and T Mokhtari Azad                                                                                                                                                                                                                                                                                                                                                                        |
| EPI_ISL_862080                                                                                                                                                                                                                                                                                                                                                                                                                                                                                                                                                                                                                                                                                                                                                                                                                                                                                                                                                                                                                                                                                                                                                                                                                                                                                 | National Influenza Center, Virology Department          | National Influenza Center                                                                                                                          | J Yavarian, NZ Shafiei Jandaghi, V Salimi, A Nejati, K Sadeghi, F Ajaminejad, N Ghavvami and T Mokhtari Azad                                                                                                                                                                                                                                                                                                                                                                        |
| EPI_ISL_862081                                                                                                                                                                                                                                                                                                                                                                                                                                                                                                                                                                                                                                                                                                                                                                                                                                                                                                                                                                                                                                                                                                                                                                                                                                                                                 | National Influenza Center, Virology Department          | National Influenza Center                                                                                                                          | NZ Shafiei Jandaghi, V Salimi, A Nejati, K Sadeghi, J Yavarian, F Ajaminejad, N Ghavvami and T Mokhtari Azad                                                                                                                                                                                                                                                                                                                                                                        |
| EPI_ISL_866822                                                                                                                                                                                                                                                                                                                                                                                                                                                                                                                                                                                                                                                                                                                                                                                                                                                                                                                                                                                                                                                                                                                                                                                                                                                                                 | Quadram Institute Bioscience                            | COVID-19 Genomics UK (COG-UK) Consortium                                                                                                           | Dave J. Baker, Gemma L. Kay, Alp Aydin, Thanh Le-Viet, Steven Rudder, Ana P. Tedim, Anastasia Kolyva, Maria Diaz, Leonardo de Oliveira Martins, Nabil-Fareed Alikhan, Lizzie Meadows, Rachael Stanley, Ngozi Eiumogo, Muhammed Yasir, Nicholas M. Thomson, Alexander J Trotter, Rachel Gilroy, Samuel Bloomfield, Claire Stuart, Andrew Bell, Reenesh Prakash, Samir Dervisevic, Alison E. Mather, John Wain, Mark Webber, Andrew J. Page, Justin O'Grady                           |
| EPI_ISL_868766, EPI_ISL_868781, EPI_ISL_868882, EPI_ISL_868883, EPI_ISL_868885, EPI_ISL_868886, EPI_ISL_868894, EPI_ISL_868895, EPI_ISL_868897, EPI_ISL_868984, EPI_ISL_868986, EPI_ISL_868987, EPI_ISL_868988, EPI_ISL_868999, EPI_ISL_869003, EPI_ISL_869005, EPI_ISL_869006, EPI_ISL_869013                                                                                                                                                                                                                                                                                                                                                                                                                                                                                                                                                                                                                                                                                                                                                                                                                                                                                                                                                                                                 | see above                                               | Bioinformatics and Biostatistics Lab, Advanced Sequencing Facility                                                                                 | Aengus Stewart, Jerome Nicod, Chelsea Sawyer, Laura Cubitt, Harshil Patel, Margaret Crawford                                                                                                                                                                                                                                                                                                                                                                                        |
| EPI_ISL_869263                                                                                                                                                                                                                                                                                                                                                                                                                                                                                                                                                                                                                                                                                                                                                                                                                                                                                                                                                                                                                                                                                                                                                                                                                                                                                 | Krasnoyarsk Regional Clinical Hospital                  | WHO National Influenza Centre Russian Federation                                                                                                   | Andrey Komissarov, Artem Fadeev, Anna Ivanova, Kseniya Komissarova, Dmitry Bazhenov, Mikhail Bakaev, Daria Danilenko, Ksenia Safina, Elena Nabieva, Georgii Bazykin, Dmitry Lioznov                                                                                                                                                                                                                                                                                                 |



|                                                                                                                                                                                                                                                                                                                                                                                                                                                                                                                                                                                                                                                                                                                                                                                                                                                                                                                                                                                                                                                                                                                                                                                                                                                                                                                                                                                                                                                |                                                                                                                |                                                                                                                                                                                                                                                         |                                                                                                                                                                                                                                                                                                                                                                                                                        |
|------------------------------------------------------------------------------------------------------------------------------------------------------------------------------------------------------------------------------------------------------------------------------------------------------------------------------------------------------------------------------------------------------------------------------------------------------------------------------------------------------------------------------------------------------------------------------------------------------------------------------------------------------------------------------------------------------------------------------------------------------------------------------------------------------------------------------------------------------------------------------------------------------------------------------------------------------------------------------------------------------------------------------------------------------------------------------------------------------------------------------------------------------------------------------------------------------------------------------------------------------------------------------------------------------------------------------------------------------------------------------------------------------------------------------------------------|----------------------------------------------------------------------------------------------------------------|---------------------------------------------------------------------------------------------------------------------------------------------------------------------------------------------------------------------------------------------------------|------------------------------------------------------------------------------------------------------------------------------------------------------------------------------------------------------------------------------------------------------------------------------------------------------------------------------------------------------------------------------------------------------------------------|
| EPI_ISL_889443, EPI_ISL_889542, EPI_ISL_890175, EPI_ISL_890176                                                                                                                                                                                                                                                                                                                                                                                                                                                                                                                                                                                                                                                                                                                                                                                                                                                                                                                                                                                                                                                                                                                                                                                                                                                                                                                                                                                 | Ohio Department of Health Laboratory                                                                           | Ohio Department of Health Laboratory                                                                                                                                                                                                                    | Holmes, Jennifer; Eric Brandt, Keoni Omura, Glen McGillivray, Caitlin McDonnell, Jade Mowery, Stephanie Mccracken, Tyler Payne, Kirtana Ramadugu, Erica Leasure, Brent Lee, Kelsey Florek, Heather Blankenship, Quanta Brown, and Tammy Bannerman                                                                                                                                                                      |
| EPI_ISL_890301                                                                                                                                                                                                                                                                                                                                                                                                                                                                                                                                                                                                                                                                                                                                                                                                                                                                                                                                                                                                                                                                                                                                                                                                                                                                                                                                                                                                                                 | KU Leuven, Rega Institute, Clinical and Epidemiological Virology                                               | KU Leuven, Rega Institute, Clinical and Epidemiological Virology                                                                                                                                                                                        | Tony Wawina-Bokalanga, Bert Vanmechelen, Joan Marti-Carerras, Piet Maes                                                                                                                                                                                                                                                                                                                                                |
| EPI_ISL_891221, EPI_ISL_891228                                                                                                                                                                                                                                                                                                                                                                                                                                                                                                                                                                                                                                                                                                                                                                                                                                                                                                                                                                                                                                                                                                                                                                                                                                                                                                                                                                                                                 | University of Medicine and Pharmacy of Craiova                                                                 | "Stefan cel Mare" University Metagenomics Lab                                                                                                                                                                                                           | Lobiuc Andrei, Gheorghita Roxana                                                                                                                                                                                                                                                                                                                                                                                       |
| EPI_ISL_891229                                                                                                                                                                                                                                                                                                                                                                                                                                                                                                                                                                                                                                                                                                                                                                                                                                                                                                                                                                                                                                                                                                                                                                                                                                                                                                                                                                                                                                 | Suceava County Emergency Hospital                                                                              | "Stefan cel Mare" University Metagenomics Lab                                                                                                                                                                                                           | Lobiuc Andrei, Gheorghita Roxana                                                                                                                                                                                                                                                                                                                                                                                       |
| EPI_ISL_896107                                                                                                                                                                                                                                                                                                                                                                                                                                                                                                                                                                                                                                                                                                                                                                                                                                                                                                                                                                                                                                                                                                                                                                                                                                                                                                                                                                                                                                 | Viollier AG                                                                                                    | University Hospital Basel, Clinical Bacteriology                                                                                                                                                                                                        | Tim Roloff, Madlen Stange, Helena MB Seth-Smith, Alfredo Mari, Karoline Leuzinger, Julia Bielicki, Christiane Beckmann, Manuel Battegay, Hans Hirsch, Adrian Egli                                                                                                                                                                                                                                                      |
| EPI_ISL_896186, EPI_ISL_896206                                                                                                                                                                                                                                                                                                                                                                                                                                                                                                                                                                                                                                                                                                                                                                                                                                                                                                                                                                                                                                                                                                                                                                                                                                                                                                                                                                                                                 | MEPHI, Aix Marseille University                                                                                | MEPHI, Aix Marseille University                                                                                                                                                                                                                         | Anthony LEVASSEUR                                                                                                                                                                                                                                                                                                                                                                                                      |
| EPI_ISL_899515                                                                                                                                                                                                                                                                                                                                                                                                                                                                                                                                                                                                                                                                                                                                                                                                                                                                                                                                                                                                                                                                                                                                                                                                                                                                                                                                                                                                                                 | Viollier AG                                                                                                    | Department of Biosystems Science and Engineering, ETH Zürich                                                                                                                                                                                            | Christian Beisel, Sarah Nadeau, Chaoran Chen, Ivan Topolsky, Philipp Jablonski, Lara Fuhrmann, David Dreifuss, Katharina Jahn, Tobias Schär, Ina Nissen, Natascha Santacroce, Elodie Burcklen, Christiane Beckmann, Maurice Redondo, Olivier Kobel, Christoph Noppen, Sophie Seidel, Noemie Santamaria de Souza, Niko Beerenwinkel, Tanja Stadler                                                                      |
| EPI_ISL_902768, EPI_ISL_902769, EPI_ISL_902770, EPI_ISL_902771, EPI_ISL_902772, EPI_ISL_902773, EPI_ISL_902774, EPI_ISL_902775, EPI_ISL_902776, EPI_ISL_902777, EPI_ISL_902778, EPI_ISL_902779, EPI_ISL_902780, EPI_ISL_902781, EPI_ISL_902782, EPI_ISL_902783, EPI_ISL_902784, EPI_ISL_902785, EPI_ISL_902786, EPI_ISL_902787, EPI_ISL_902788, EPI_ISL_902789, EPI_ISL_902790, EPI_ISL_902791, EPI_ISL_902792, EPI_ISL_902793, EPI_ISL_902794, EPI_ISL_902795, EPI_ISL_902796, EPI_ISL_902797, EPI_ISL_902798, EPI_ISL_902799, EPI_ISL_902800, EPI_ISL_902801, EPI_ISL_902802, EPI_ISL_902803, EPI_ISL_902804, EPI_ISL_902805, EPI_ISL_902806, EPI_ISL_902807, EPI_ISL_902808, EPI_ISL_902809, EPI_ISL_902810, EPI_ISL_902811, EPI_ISL_902812, EPI_ISL_902813, EPI_ISL_902814, EPI_ISL_902815, EPI_ISL_902816, EPI_ISL_902817, EPI_ISL_902818, EPI_ISL_902819, EPI_ISL_902820, EPI_ISL_902821, EPI_ISL_902822, EPI_ISL_902823, EPI_ISL_902824, EPI_ISL_902825, EPI_ISL_902826, EPI_ISL_902827, EPI_ISL_902828, EPI_ISL_902829, EPI_ISL_902830, EPI_ISL_902831, EPI_ISL_902832, EPI_ISL_902833, EPI_ISL_902835, EPI_ISL_902836, EPI_ISL_902837, EPI_ISL_902838, EPI_ISL_902839, EPI_ISL_902840, EPI_ISL_902841, EPI_ISL_902842, EPI_ISL_902843, EPI_ISL_902844, EPI_ISL_902845, EPI_ISL_902846, EPI_ISL_902847, EPI_ISL_902848, EPI_ISL_902849, EPI_ISL_902850, EPI_ISL_902851, EPI_ISL_902852, EPI_ISL_902853, EPI_ISL_902854, EPI_ISL_902855 | Department of Virology and Immunology, University of Helsinki and Helsinki University Hospital, Huslab Finland | Teemu Smura, Ravi Kant, Phuoc Truong, Hussein Alburkat, Hannimari Kallio-Kokko, Jenni Virtanen, Maija Suvanto, Essi Korhonen, Sari Hannula, Harri Kangas, Hanna Liimatainen, Satu Kurkela, Hanna Jarva, Maija Lappalainen, Pekka Elonen, Olli Vapalahti |                                                                                                                                                                                                                                                                                                                                                                                                                        |
| see above                                                                                                                                                                                                                                                                                                                                                                                                                                                                                                                                                                                                                                                                                                                                                                                                                                                                                                                                                                                                                                                                                                                                                                                                                                                                                                                                                                                                                                      | Department of Virology and Immunology, University of Helsinki and Helsinki University Hospital, Huslab Finland | Department of Virology, Faculty of Medicine, University of Helsinki, Helsinki, Finland                                                                                                                                                                  | Maryland Department of Health Laboratories Administration                                                                                                                                                                                                                                                                                                                                                              |
| EPI_ISL_902934, EPI_ISL_902949                                                                                                                                                                                                                                                                                                                                                                                                                                                                                                                                                                                                                                                                                                                                                                                                                                                                                                                                                                                                                                                                                                                                                                                                                                                                                                                                                                                                                 | Maryland Public Health Laboratory                                                                              | Maryland Public Health Laboratory                                                                                                                                                                                                                       |                                                                                                                                                                                                                                                                                                                                                                                                                        |
| EPI_ISL_903003                                                                                                                                                                                                                                                                                                                                                                                                                                                                                                                                                                                                                                                                                                                                                                                                                                                                                                                                                                                                                                                                                                                                                                                                                                                                                                                                                                                                                                 | Seattle Flu Study                                                                                              | Seattle Flu Study                                                                                                                                                                                                                                       | Deborah A. Nickerson, Chris D. Frazar, Jover Lee, Benjamin Pelle, Erica Ryke, Matthew Richardson, Amanda Adler, Elisabeth Brandstetter, Peter D. Han, Kairsten Fay, Misja Ilcisin, Kirsten Lacombe, Thomas R. Sibley, Melissa Truong, Caitlin R. Wolf, Michael Boeckh, Janet A. Englund, Michael Famulare, Barry R. Lutz, Mark J. Rieder, Lea M. Starita, Matthew Thompson, Jay Shendure, Trevor Bedford, Helen Y. Chu |
| EPI_ISL_903650, EPI_ISL_903718                                                                                                                                                                                                                                                                                                                                                                                                                                                                                                                                                                                                                                                                                                                                                                                                                                                                                                                                                                                                                                                                                                                                                                                                                                                                                                                                                                                                                 | VT Dept. of Health Laboratory                                                                                  | Genomics and Discovery, Respiratory Viruses Branch, Division of Viral Diseases, Centers for Disease Control and Prevention                                                                                                                              | Krista Queen, Yan Li, Ying Tao, Jing Zhang, Anna Uehara, Anna Montmayeur, Clinton R. Paden, Peter W. Cook, Rachel Marine, Mili Sheth, Jasmine Padilla, Sarah Nobles, Mark Burroughs, Lori Rowe, Haibin Wang, Ben L. Rambo-Martin, Dhwani Batra, Justin Lee, Suxiang Tong                                                                                                                                               |
| EPI_ISL_903820                                                                                                                                                                                                                                                                                                                                                                                                                                                                                                                                                                                                                                                                                                                                                                                                                                                                                                                                                                                                                                                                                                                                                                                                                                                                                                                                                                                                                                 | PA Department of Health, Bureau of Laboratories                                                                | Genomics and Discovery, Respiratory Viruses Branch, Division of Viral Diseases, Centers for Disease Control and Prevention                                                                                                                              | Krista Queen, Yan Li, Ying Tao, Jing Zhang, Anna Uehara, Anna Montmayeur, Clinton R. Paden, Peter W. Cook, Rachel Marine, Mili Sheth, Jasmine Padilla, Sarah Nobles, Mark Burroughs, Lori Rowe, Haibin Wang, Ben L. Rambo-Martin, Dhwani Batra, Justin Lee, Suxiang Tong                                                                                                                                               |
| EPI_ISL_904005, EPI_ISL_904006                                                                                                                                                                                                                                                                                                                                                                                                                                                                                                                                                                                                                                                                                                                                                                                                                                                                                                                                                                                                                                                                                                                                                                                                                                                                                                                                                                                                                 | Scientific Veterinary Institute Novi Sad                                                                       | Veterinary Specialized Institute "Kraljevo", Serbia                                                                                                                                                                                                     | Vidanovic,D., Tesovic,B., Knezevic,A., Jovanovic,T., Jankovic,M., Sekler,M., Banovic Djeri,B., Petrovic,T., Volkening,J., Afonso,C.                                                                                                                                                                                                                                                                                    |
| EPI_ISL_904017                                                                                                                                                                                                                                                                                                                                                                                                                                                                                                                                                                                                                                                                                                                                                                                                                                                                                                                                                                                                                                                                                                                                                                                                                                                                                                                                                                                                                                 | NCSLPH                                                                                                         | NCSLPH                                                                                                                                                                                                                                                  | Kitty Chase, Michael C Miller, Shermalyn Greene, William Glover                                                                                                                                                                                                                                                                                                                                                        |
| EPI_ISL_904469, EPI_ISL_904471, EPI_ISL_904472, EPI_ISL_904474                                                                                                                                                                                                                                                                                                                                                                                                                                                                                                                                                                                                                                                                                                                                                                                                                                                                                                                                                                                                                                                                                                                                                                                                                                                                                                                                                                                 | Dutch COVID-19 response team                                                                                   | Erasmus Medical Center                                                                                                                                                                                                                                  | Bas Oude Munnink, Reina Sikkema, David Nieuwenhuijse, Irina Chestakova, Anne van der Linden, Marjan Boter, Emmanuelle Munger, Corine GeurtsvanKessel, Annemiek van der Eijk, Richard Molenkamp, Marion Koopmans, on behalf of the Dutch national COVID-19 response team.                                                                                                                                               |
| EPI_ISL_904735, EPI_ISL_904736, EPI_ISL_904737, EPI_ISL_904738, EPI_ISL_904797, EPI_ISL_904798                                                                                                                                                                                                                                                                                                                                                                                                                                                                                                                                                                                                                                                                                                                                                                                                                                                                                                                                                                                                                                                                                                                                                                                                                                                                                                                                                 | Dutch COVID-19 response team                                                                                   | National Institute for Public Health and the Environment (RIVM)                                                                                                                                                                                         | Adam Meijer, Harry Vennema, Dirk Eggink, Jeroen Cremer, Sharon van den Brink, Bas van der Veer, AnneMarie van den Brandt, Florian Zwagemaker, Dennis Schmitz, Chantal Reusken, on behalf of the national COVID-19 response team                                                                                                                                                                                        |
| EPI_ISL_904935, EPI_ISL_904940, EPI_ISL_904949, EPI_ISL_904950, EPI_ISL_904951, EPI_ISL_904952, EPI_ISL_904953, EPI_ISL_904955                                                                                                                                                                                                                                                                                                                                                                                                                                                                                                                                                                                                                                                                                                                                                                                                                                                                                                                                                                                                                                                                                                                                                                                                                                                                                                                 | Vilnius University Hospital Santaros Klinikos, Vilnius University                                              | Institute of Biotechnology, Life Sciences Center, Vilnius University                                                                                                                                                                                    | Emilija Vasiliunaite, Milda Norkiene, Albertas Timinskas, Alma Gedvilaite, Aurelija Zvirbliene, Daniel Naumovas, Laimonas Griskevicius                                                                                                                                                                                                                                                                                 |
| EPI_ISL_905080                                                                                                                                                                                                                                                                                                                                                                                                                                                                                                                                                                                                                                                                                                                                                                                                                                                                                                                                                                                                                                                                                                                                                                                                                                                                                                                                                                                                                                 | Dutch COVID-19 response team                                                                                   | National Institute for Public Health and the Environment (RIVM)                                                                                                                                                                                         | Adam Meijer, Harry Vennema, Dirk Eggink, Jeroen Cremer, Sharon van den Brink, Bas van der Veer, AnneMarie van den Brandt, Florian Zwagemaker, Dennis Schmitz, Chantal Reusken, on behalf of the national COVID-19 response team                                                                                                                                                                                        |
| EPI_ISL_906263                                                                                                                                                                                                                                                                                                                                                                                                                                                                                                                                                                                                                                                                                                                                                                                                                                                                                                                                                                                                                                                                                                                                                                                                                                                                                                                                                                                                                                 | University of Wisconsin-Madison AIDS Vaccine Research Laboratories                                             | University of Wisconsin-Madison AIDS Vaccine Research Laboratories                                                                                                                                                                                      | Gage Moreno, Katarina Braun, et al. AIDS Vaccine Research Laboratories                                                                                                                                                                                                                                                                                                                                                 |
| EPI_ISL_907078, EPI_ISL_907079, EPI_ISL_907080, EPI_ISL_907081, EPI_ISL_907082, EPI_ISL_907083                                                                                                                                                                                                                                                                                                                                                                                                                                                                                                                                                                                                                                                                                                                                                                                                                                                                                                                                                                                                                                                                                                                                                                                                                                                                                                                                                 | Biology, MCL                                                                                                   | Biology, MCL                                                                                                                                                                                                                                            | Seadawy,M.G., Shamel,M.D., Gad,A.F., Elhoseiny,M.F., Zekri,A.N.                                                                                                                                                                                                                                                                                                                                                        |
| EPI_ISL_910386, EPI_ISL_910387, EPI_ISL_910388, EPI_ISL_910389, EPI_ISL_910458, EPI_ISL_910459, EPI_ISL_910460, EPI_ISL_910461, EPI_ISL_910462, EPI_ISL_910647, EPI_ISL_910700, EPI_ISL_910701, EPI_ISL_910703, EPI_ISL_910705, EPI_ISL_910714, EPI_ISL_910715, EPI_ISL_910716, EPI_ISL_910717, EPI_ISL_910720, EPI_ISL_910775, EPI_ISL_910776, EPI_ISL_911240                                                                                                                                                                                                                                                                                                                                                                                                                                                                                                                                                                                                                                                                                                                                                                                                                                                                                                                                                                                                                                                                                 | see above                                                                                                      | see above                                                                                                                                                                                                                                               | Anke Wienecke-Baldacchino, Catherine Ragimbeau, Jessica Tapp, Fatu Djabi, Lise Pignon, Raoul Salmon, Tamir Abdelrahman                                                                                                                                                                                                                                                                                                 |
| see above                                                                                                                                                                                                                                                                                                                                                                                                                                                                                                                                                                                                                                                                                                                                                                                                                                                                                                                                                                                                                                                                                                                                                                                                                                                                                                                                                                                                                                      | Laboratoire national de sante, Microbiology, Virology                                                          | Laboratoire national de sante, Microbiology, Microbial Genomics Platform                                                                                                                                                                                |                                                                                                                                                                                                                                                                                                                                                                                                                        |
| EPI_ISL_911677, EPI_ISL_911679, EPI_ISL_911680, EPI_ISL_911683, EPI_ISL_911687, EPI_ISL_911697                                                                                                                                                                                                                                                                                                                                                                                                                                                                                                                                                                                                                                                                                                                                                                                                                                                                                                                                                                                                                                                                                                                                                                                                                                                                                                                                                 | Alaska State Virology Laboratory                                                                               | Alaska State Virology Laboratory                                                                                                                                                                                                                        | Stephanie DeRonde, Lisa Smith, Ph.D., Jack Chen, Ph.D.                                                                                                                                                                                                                                                                                                                                                                 |
| EPI_ISL_911708                                                                                                                                                                                                                                                                                                                                                                                                                                                                                                                                                                                                                                                                                                                                                                                                                                                                                                                                                                                                                                                                                                                                                                                                                                                                                                                                                                                                                                 | Tanjungpura University Hospital                                                                                | Tanjungpura University Hospital                                                                                                                                                                                                                         | Puji Astuti; Andriani; Mahyarudin; Delima Fajar Liana; Virhan Novianry ; Sofi Siti Shofiyah                                                                                                                                                                                                                                                                                                                            |
| EPI_ISL_911750                                                                                                                                                                                                                                                                                                                                                                                                                                                                                                                                                                                                                                                                                                                                                                                                                                                                                                                                                                                                                                                                                                                                                                                                                                                                                                                                                                                                                                 | Tanjungpura University Hospital                                                                                | Tanjungpura University Hospital                                                                                                                                                                                                                         | Virhan Novianry; Delima Fajar Liana; Mahyarudin; Andriani; Sofi Siti Shofiyah; Puji Astuti; Muhammad Kahtan; Ambar Rialita; Eka Ardiani Putri; Wiwik Windarti; Helmi Sastrawan, Rini Andriani                                                                                                                                                                                                                          |
| EPI_ISL_913157, EPI_ISL_913160, EPI_ISL_913201, EPI_ISL_913202, EPI_ISL_913203, EPI_ISL_913204, EPI_ISL_913210, EPI_ISL_913211, EPI_ISL_913212, EPI_ISL_913213, EPI_ISL_913214, EPI_ISL_913215, EPI_ISL_913217, EPI_ISL_913218, EPI_ISL_913219, EPI_ISL_913220, EPI_ISL_913221, EPI_ISL_913222, EPI_ISL_913223, EPI_ISL_913224, EPI_ISL_913226, EPI_ISL_913227, EPI_ISL_913228, EPI_ISL_913229, EPI_ISL_913230, EPI_ISL_913231, EPI_ISL_913236, EPI_ISL_913237, EPI_ISL_913239, EPI_ISL_913241, EPI_ISL_913243, EPI_ISL_913247, EPI_ISL_913249, EPI_ISL_913250, EPI_ISL_913252, EPI_ISL_913254, EPI_ISL_913255                                                                                                                                                                                                                                                                                                                                                                                                                                                                                                                                                                                                                                                                                                                                                                                                                                 | see above                                                                                                      | see above                                                                                                                                                                                                                                               | Valesano                                                                                                                                                                                                                                                                                                                                                                                                               |
| EPI_ISL_913278, EPI_ISL_913279, EPI_ISL_913285, EPI_ISL_913313                                                                                                                                                                                                                                                                                                                                                                                                                                                                                                                                                                                                                                                                                                                                                                                                                                                                                                                                                                                                                                                                                                                                                                                                                                                                                                                                                                                 | Klinisk mikrobiologi                                                                                           | The Public Health Agency of Sweden                                                                                                                                                                                                                      | Anna-Malin Linde, Maria Lind Karlberg, Carlo Berg, Oskar Karlsson Lindsjo, Sofia Stamouli, Reza Advani, Mattias Haukland, Petra Holmstrom, Noura Walai, Petra Edquist, Mia Brytting, Anna Risberg, Karin Tegmark-Wisell                                                                                                                                                                                                |
| EPI_ISL_913343                                                                                                                                                                                                                                                                                                                                                                                                                                                                                                                                                                                                                                                                                                                                                                                                                                                                                                                                                                                                                                                                                                                                                                                                                                                                                                                                                                                                                                 | Synlab Medilab, Mikrobiologi                                                                                   | The Public Health Agency of Sweden                                                                                                                                                                                                                      | Anna-Malin Linde, Maria Lind Karlberg, Carlo Berg, Oskar Karlsson Lindsjo, Sofia Stamouli, Reza Advani, Mattias Haukland, Petra Holmstrom, Noura Walai, Petra Edquist, Mia Brytting, Anna Risberg, Karin Tegmark-Wisell                                                                                                                                                                                                |
| EPI_ISL_913344, EPI_ISL_913345, EPI_ISL_913346, EPI_ISL_913347, EPI_ISL_913354, EPI_ISL_913355, EPI_ISL_913356, EPI_ISL_913461, EPI_ISL_913480                                                                                                                                                                                                                                                                                                                                                                                                                                                                                                                                                                                                                                                                                                                                                                                                                                                                                                                                                                                                                                                                                                                                                                                                                                                                                                 | Klinisk mikrobiologi                                                                                           | The Public Health Agency of Sweden                                                                                                                                                                                                                      | Anna-Malin Linde, Maria Lind Karlberg, Carlo Berg, Oskar Karlsson Lindsjo, Sofia Stamouli, Reza Advani, Mattias Haukland, Petra Holmstrom, Noura Walai, Petra Edquist, Mia Brytting, Anna Risberg, Karin Tegmark-Wisell                                                                                                                                                                                                |
| EPI_ISL_913933, EPI_ISL_913934,                                                                                                                                                                                                                                                                                                                                                                                                                                                                                                                                                                                                                                                                                                                                                                                                                                                                                                                                                                                                                                                                                                                                                                                                                                                                                                                                                                                                                | Instituto de Diagnostico y Referencia Epidemiologicos                                                          | Instituto de Diagnostico y Referencia Epidemiologicos                                                                                                                                                                                                   | Claudia Wong-Arambula, Abril Rodriguez-Maldonado, Fabiola Garces-Ayala, Adnan Araiza-Rodriguez, David Frago-so-Fonseca, Sergio Rangel-Guerrero,                                                                                                                                                                                                                                                                        |





|                                                                                                                                                                                                                                                                                                                                                                                                                                                                                                                                                                                                                                                                                                                                                                                                                                                                                                                                                                                                |                                                                                                         |                                                                                                                                |                                                                                                                                                                                                                                                                                                                                                                                                                                         |
|------------------------------------------------------------------------------------------------------------------------------------------------------------------------------------------------------------------------------------------------------------------------------------------------------------------------------------------------------------------------------------------------------------------------------------------------------------------------------------------------------------------------------------------------------------------------------------------------------------------------------------------------------------------------------------------------------------------------------------------------------------------------------------------------------------------------------------------------------------------------------------------------------------------------------------------------------------------------------------------------|---------------------------------------------------------------------------------------------------------|--------------------------------------------------------------------------------------------------------------------------------|-----------------------------------------------------------------------------------------------------------------------------------------------------------------------------------------------------------------------------------------------------------------------------------------------------------------------------------------------------------------------------------------------------------------------------------------|
| see above                                                                                                                                                                                                                                                                                                                                                                                                                                                                                                                                                                                                                                                                                                                                                                                                                                                                                                                                                                                      | Instituto Nacional de Medicina Genómica                                                                 | Instituto Nacional de Medicina Genómica                                                                                        | Hidalgo-Miranda A, Mendoza-Vargas A, Reyes-Grajeda JP, Cisneros-Villanueva M, Cedro-Tanda A,Peñaloza-Figueroa F, Herrera-Montalvo LA                                                                                                                                                                                                                                                                                                    |
| EPI_ISL_933707                                                                                                                                                                                                                                                                                                                                                                                                                                                                                                                                                                                                                                                                                                                                                                                                                                                                                                                                                                                 | Instituto de Diagnostico y Referencia Epidemiologicos<br>INDRE_RNLSP                                    | Instituto de Diagnostico y Referencia Epidemiologicos<br>(INDRE)                                                               | Claudia Wong-Arambula, Abril Rodriguez-Maldonado, Fabiola Garces-Ayala, Adnan Araiza-Rodriguez, David Fragoso-Fonseca, Sergio Rangel-Guerrero, Mayra Jimenez-Morales, Nancy Munoz-Hernandez, Natividad Cruz-Ortiz, Tatiana Nunez-Garcia, Gisela Barrera-Badillo, Lucia Hernandez-Rivas, Irma Lopez-Martinez, Ernesto Ramirez-Gonzalez.                                                                                                  |
| EPI_ISL_934337                                                                                                                                                                                                                                                                                                                                                                                                                                                                                                                                                                                                                                                                                                                                                                                                                                                                                                                                                                                 | Klinisk mikrobiologi                                                                                    | The Public Health Agency of Sweden                                                                                             | Anna-Malin Linde, Maria Lind Karlberg, Carlo Berg, Oskar Karlsson Lindsjo, Sofia Stamouli, Reza Advani, Mattias Haukland, Petra Holmstrom, Noura Walai, Petra Edquist, Mia Brytting, Anna Risberg, Karin Tegmark-Wisell                                                                                                                                                                                                                 |
| EPI_ISL_934544                                                                                                                                                                                                                                                                                                                                                                                                                                                                                                                                                                                                                                                                                                                                                                                                                                                                                                                                                                                 | Institut für Virologie am Department für Hygiene, Mikrobiologie und Public Health                       | Bergthaler laboratory, CeMM Research Center for Molecular Medicine of the Austrian Academy of Sciences                         | Lukas Endler, Anna Schedl, Thomas Penz, Benedikt Agerer, Maëlle Le Moing, Michael Schuster, Bekir Erguner, Jan Laine, Martin Senekowitsch, Christoph Bock, Andreas Bergthaler                                                                                                                                                                                                                                                           |
| EPI_ISL_935215                                                                                                                                                                                                                                                                                                                                                                                                                                                                                                                                                                                                                                                                                                                                                                                                                                                                                                                                                                                 | KU Leuven, Rega Institute, Clinical and Epidemiological Virology                                        | KU Leuven, Rega Institute, Clinical and Epidemiological Virology                                                               | Tony Wawina-Bokalanga, Bert Vanmechelen, Joan Marti-Carreras, Piet Maes                                                                                                                                                                                                                                                                                                                                                                 |
| EPI_ISL_935423, EPI_ISL_935424, EPI_ISL_935425, EPI_ISL_935430, EPI_ISL_935431, EPI_ISL_935433, EPI_ISL_935436, EPI_ISL_935438, EPI_ISL_935447, EPI_ISL_935450, EPI_ISL_935451, EPI_ISL_935454, EPI_ISL_935456, EPI_ISL_935457, EPI_ISL_935458, EPI_ISL_935460, EPI_ISL_935461, EPI_ISL_935462, EPI_ISL_935466, EPI_ISL_935467, EPI_ISL_935474                                                                                                                                                                                                                                                                                                                                                                                                                                                                                                                                                                                                                                                 |                                                                                                         |                                                                                                                                |                                                                                                                                                                                                                                                                                                                                                                                                                                         |
| see above                                                                                                                                                                                                                                                                                                                                                                                                                                                                                                                                                                                                                                                                                                                                                                                                                                                                                                                                                                                      | Florida Bureau of Public Health Laboratories                                                            | Florida Bureau of Public Health Laboratories                                                                                   | Sarah Schmedes, Jason Blanton                                                                                                                                                                                                                                                                                                                                                                                                           |
| EPI_ISL_935878, EPI_ISL_935879, EPI_ISL_935880, EPI_ISL_935881, EPI_ISL_935882, EPI_ISL_935883, EPI_ISL_935884, EPI_ISL_935885, EPI_ISL_935886, EPI_ISL_935888, EPI_ISL_935889, EPI_ISL_935893, EPI_ISL_935894, EPI_ISL_935895, EPI_ISL_935898, EPI_ISL_935899, EPI_ISL_935900, EPI_ISL_935901, EPI_ISL_935902, EPI_ISL_935904, EPI_ISL_935907, EPI_ISL_935908, EPI_ISL_935910, EPI_ISL_935911, EPI_ISL_935912, EPI_ISL_935913, EPI_ISL_935915, EPI_ISL_935916, EPI_ISL_935917, EPI_ISL_935919, EPI_ISL_935920, EPI_ISL_935921, EPI_ISL_935922, EPI_ISL_935924, EPI_ISL_935925, EPI_ISL_935926, EPI_ISL_935927, EPI_ISL_935928, EPI_ISL_935929, EPI_ISL_935930, EPI_ISL_935931, EPI_ISL_935932, EPI_ISL_935933, EPI_ISL_935934, EPI_ISL_935935, EPI_ISL_935936, EPI_ISL_935937, EPI_ISL_935938, EPI_ISL_935939, EPI_ISL_935940, EPI_ISL_935941, EPI_ISL_935942, EPI_ISL_935943, EPI_ISL_935944, EPI_ISL_935945, EPI_ISL_935946, EPI_ISL_935947, EPI_ISL_935949, EPI_ISL_935950, EPI_ISL_935951 |                                                                                                         |                                                                                                                                |                                                                                                                                                                                                                                                                                                                                                                                                                                         |
| see above                                                                                                                                                                                                                                                                                                                                                                                                                                                                                                                                                                                                                                                                                                                                                                                                                                                                                                                                                                                      | Cadham Provincial laboratory                                                                            | National Microbiology Laboratory (NML)                                                                                         | Anna Majer, Shari Tyson, Grace Seo, Philip Mabon, Elsie Grudeski, Rhiannon Huzarewich, Russell Mandes, Anneliese Landgraff, Jennifer Tanner, Natalie Knox, Morag Graham, Gary Van Domselaar, Paul Van Caeselele, Jared Bullard, David Alexander, Kerry Dust, Nathalie Bastien, Yan Li, Timothy Booth, Darian Hole, Madison Chapel, Kirsten Biggar, CanCOGeN's metadata curation team, Public Health Agency of Canada CanCOGeN team      |
| EPI_ISL_936489                                                                                                                                                                                                                                                                                                                                                                                                                                                                                                                                                                                                                                                                                                                                                                                                                                                                                                                                                                                 | Hospital Raja Perempuan Zainab II                                                                       | Institute for Medical Research, Infectious Disease Research Centre, National Institutes of Health, Ministry of Health Malaysia | Suppiah J, Kamel K, Azizan MA, Thayan R                                                                                                                                                                                                                                                                                                                                                                                                 |
| EPI_ISL_936490                                                                                                                                                                                                                                                                                                                                                                                                                                                                                                                                                                                                                                                                                                                                                                                                                                                                                                                                                                                 | Makmal Kesihatan Awam Kota Bharu                                                                        | Institute for Medical Research, Infectious Disease Research Centre, National Institutes of Health, Ministry of Health Malaysia | Suppiah J, Kamel K, Azizan MA, Thayan R                                                                                                                                                                                                                                                                                                                                                                                                 |
| EPI_ISL_936617, EPI_ISL_936618, EPI_ISL_936620, EPI_ISL_936622, EPI_ISL_936626, EPI_ISL_936629, EPI_ISL_936630, EPI_ISL_937015                                                                                                                                                                                                                                                                                                                                                                                                                                                                                                                                                                                                                                                                                                                                                                                                                                                                 | Northwestern Memorial Hospital                                                                          | Ozer Lab                                                                                                                       | Ramon Lorenzo-Redondo, Lacy M. Simons, Chad J. Achenbach, Lawrence J. Jennings, Michael G. Ison, Judd F. Hultquist, Egon A. Ozer                                                                                                                                                                                                                                                                                                        |
| EPI_ISL_941275, EPI_ISL_941276, EPI_ISL_941277, EPI_ISL_941278, EPI_ISL_941279                                                                                                                                                                                                                                                                                                                                                                                                                                                                                                                                                                                                                                                                                                                                                                                                                                                                                                                 | Nigeria Centre for Disease Control (NCDC)                                                               | African Centre of Excellence for Genomics of Infectious Diseases (ACEGID), Redeemer's University                               | Oluniyi P.E. et al                                                                                                                                                                                                                                                                                                                                                                                                                      |
| EPI_ISL_941906                                                                                                                                                                                                                                                                                                                                                                                                                                                                                                                                                                                                                                                                                                                                                                                                                                                                                                                                                                                 | Virginia DCLS                                                                                           | Virginia DCLS                                                                                                                  | Virginia DCLS                                                                                                                                                                                                                                                                                                                                                                                                                           |
| EPI_ISL_941930                                                                                                                                                                                                                                                                                                                                                                                                                                                                                                                                                                                                                                                                                                                                                                                                                                                                                                                                                                                 | Florida Bureau of Public Health Laboratories                                                            | Florida Bureau of Public Health Laboratories                                                                                   | Sarah Schmedes, Jason Blanton                                                                                                                                                                                                                                                                                                                                                                                                           |
| EPI_ISL_942402, EPI_ISL_942403                                                                                                                                                                                                                                                                                                                                                                                                                                                                                                                                                                                                                                                                                                                                                                                                                                                                                                                                                                 | Virginia DCLS                                                                                           | Virginia DCLS                                                                                                                  | Virginia DCLS                                                                                                                                                                                                                                                                                                                                                                                                                           |
| EPI_ISL_942456, EPI_ISL_942457, EPI_ISL_942460, EPI_ISL_942461, EPI_ISL_942463, EPI_ISL_942465, EPI_ISL_942468, EPI_ISL_942469, EPI_ISL_942472, EPI_ISL_942473, EPI_ISL_942474, EPI_ISL_942476, EPI_ISL_942477, EPI_ISL_942481                                                                                                                                                                                                                                                                                                                                                                                                                                                                                                                                                                                                                                                                                                                                                                 |                                                                                                         |                                                                                                                                |                                                                                                                                                                                                                                                                                                                                                                                                                                         |
| see above                                                                                                                                                                                                                                                                                                                                                                                                                                                                                                                                                                                                                                                                                                                                                                                                                                                                                                                                                                                      | Gundersen Molecular Diagnostics Laboratory                                                              | Kabara Cancer Research Institute                                                                                               | Craig S. Richmond, Paraic A. Kenny                                                                                                                                                                                                                                                                                                                                                                                                      |
| EPI_ISL_942485, EPI_ISL_942490, EPI_ISL_942491, EPI_ISL_942492, EPI_ISL_942493                                                                                                                                                                                                                                                                                                                                                                                                                                                                                                                                                                                                                                                                                                                                                                                                                                                                                                                 | Gundersen Clinical Microbiology Laboratory                                                              | Kabara Cancer Research Institute                                                                                               | Craig S. Richmond, Paraic A. Kenny                                                                                                                                                                                                                                                                                                                                                                                                      |
| EPI_ISL_942495, EPI_ISL_942497, EPI_ISL_942500, EPI_ISL_942501                                                                                                                                                                                                                                                                                                                                                                                                                                                                                                                                                                                                                                                                                                                                                                                                                                                                                                                                 | Gundersen Molecular Diagnostics Laboratory                                                              | Kabara Cancer Research Institute                                                                                               | Craig S. Richmond, Paraic A. Kenny                                                                                                                                                                                                                                                                                                                                                                                                      |
| EPI_ISL_942506                                                                                                                                                                                                                                                                                                                                                                                                                                                                                                                                                                                                                                                                                                                                                                                                                                                                                                                                                                                 | Gundersen Clinical Microbiology Laboratory                                                              | Kabara Cancer Research Institute                                                                                               | Craig S. Richmond, Paraic A. Kenny                                                                                                                                                                                                                                                                                                                                                                                                      |
| EPI_ISL_942514, EPI_ISL_942518, EPI_ISL_942519, EPI_ISL_942521, EPI_ISL_942522, EPI_ISL_942523, EPI_ISL_942531, EPI_ISL_942533, EPI_ISL_942541, EPI_ISL_942542, EPI_ISL_942543, EPI_ISL_942545, EPI_ISL_942546, EPI_ISL_942548                                                                                                                                                                                                                                                                                                                                                                                                                                                                                                                                                                                                                                                                                                                                                                 |                                                                                                         |                                                                                                                                |                                                                                                                                                                                                                                                                                                                                                                                                                                         |
| see above                                                                                                                                                                                                                                                                                                                                                                                                                                                                                                                                                                                                                                                                                                                                                                                                                                                                                                                                                                                      | Gundersen Molecular Diagnostics Laboratory                                                              | Kabara Cancer Research Institute                                                                                               | Craig S. Richmond, Paraic A. Kenny                                                                                                                                                                                                                                                                                                                                                                                                      |
| EPI_ISL_943607, EPI_ISL_943609                                                                                                                                                                                                                                                                                                                                                                                                                                                                                                                                                                                                                                                                                                                                                                                                                                                                                                                                                                 | Central Laboratory of Public Health of Rio Grande do Sul (Lacen-RS)                                     | State Center for Health Surveillance of the Health Department of the State of Rio Grande do Sul (CEVS/SES-RS)                  | Aline Campos, Amanda da Silva, Anelise Schaurich, Claudia Dornelles, Cynthia Molina, Fernanda Godinho, Lara Crescente, Leticia Garay, Regina Barcellos, Richard Salvato, Tatiana Gregianini, Vagner Fonseca                                                                                                                                                                                                                             |
| EPI_ISL_947265                                                                                                                                                                                                                                                                                                                                                                                                                                                                                                                                                                                                                                                                                                                                                                                                                                                                                                                                                                                 | RS Sari Asih Ciledug                                                                                    | Eijkman Institute for Molecular Biology, Ministry of Research and Technology/National Agency for Research and Innovation       | Frilasita A Yudhaputri, Hidayat Trimarsanto, Iskandar Adnan, Lydia V. Panggalo, Sukma Oktavianthi, Willy Agustine, Edison Johar, Safarina G Malik, Khin Saw Myint, Amin Soebandrio                                                                                                                                                                                                                                                      |
| EPI_ISL_947268                                                                                                                                                                                                                                                                                                                                                                                                                                                                                                                                                                                                                                                                                                                                                                                                                                                                                                                                                                                 | RSU Anggrek Mas                                                                                         | Eijkman Institute for Molecular Biology, Ministry of Research and Technology/National Agency for Research and Innovation       | Frilasita A Yudhaputri, Hidayat Trimarsanto, Iskandar Adnan, Lydia V. Panggalo, Sukma Oktavianthi, Willy Agustine, Edison Johar, Safarina G Malik, Khin Saw Myint, Amin Soebandrio                                                                                                                                                                                                                                                      |
| EPI_ISL_947270                                                                                                                                                                                                                                                                                                                                                                                                                                                                                                                                                                                                                                                                                                                                                                                                                                                                                                                                                                                 | RS Mitra Keluarga Gading Serpong                                                                        | Eijkman Institute for Molecular Biology, Ministry of Research and Technology/National Agency for Research and Innovation       | Frilasita A Yudhaputri, Hidayat Trimarsanto, Iskandar Adnan, Lydia V. Panggalo, Sukma Oktavianthi, Willy Agustine, Edison Johar, Safarina G Malik, Khin Saw Myint, Amin Soebandrio                                                                                                                                                                                                                                                      |
| EPI_ISL_947273                                                                                                                                                                                                                                                                                                                                                                                                                                                                                                                                                                                                                                                                                                                                                                                                                                                                                                                                                                                 | RSIA Sayyidah                                                                                           | Eijkman Institute for Molecular Biology, Ministry of Research and Technology/National Agency for Research and Innovation       | Frilasita A Yudhaputri, Hidayat Trimarsanto, Iskandar Adnan, Lydia V. Panggalo, Sukma Oktavianthi, Willy Agustine, Edison Johar, Safarina G Malik, Khin Saw Myint, Amin Soebandrio                                                                                                                                                                                                                                                      |
| EPI_ISL_949353, EPI_ISL_949355, EPI_ISL_949364, EPI_ISL_949369, EPI_ISL_949374, EPI_ISL_949377                                                                                                                                                                                                                                                                                                                                                                                                                                                                                                                                                                                                                                                                                                                                                                                                                                                                                                 | University of Birmingham                                                                                | COVID-19 Genomics UK (COG-UK) Consortium                                                                                       | Institute of Microbiology, University of Birmingham: Claire McMurray, Joanne Stockton, Samuel Nicholls, Radoslaw Poplawski, Will Rowe, Josh Quick, Nicholas Loman. University of Birmingham Testing Laboratory: Celina M Whalley, Andrew Bosworth, Charlotte Poxon, Kasun Wanigasooriya, Oliver Pickles, Mike Kidd, Alex Richter, Andrew D Beggs PHE Heartlands Lab: Husam Osman, Andrew Bosworth. Queen Elizabeth Hospital: Anna Casey |
| EPI_ISL_950620, EPI_ISL_950624, EPI_ISL_950627, EPI_ISL_950628, EPI_ISL_950635                                                                                                                                                                                                                                                                                                                                                                                                                                                                                                                                                                                                                                                                                                                                                                                                                                                                                                                 | Queens Medical Centre, Clinical Microbiology Department / DeepSeq Nottingham                            | COVID-19 Genomics UK (COG-UK) Consortium                                                                                       | Gemma Clark, Wendy Smith, Manjinder Khakh, Vicki M Fleming, Michelle M Lister, Hannah Howson-Wells, Jonathan Ball, Patrick McClure, Joseph Chappell, Theocharis Tsoleridis, Nadine Holmes, Matthew Carlisle, Christopher Moore, Fei Sang, Johnny Debebe, Victoria Wright, Matthew Loose                                                                                                                                                 |
| EPI_ISL_955156                                                                                                                                                                                                                                                                                                                                                                                                                                                                                                                                                                                                                                                                                                                                                                                                                                                                                                                                                                                 | University of Sarajevo, Veterinary Faculty, Laboratory for Molecular Diagnostic and Research Laboratory | University of Sarajevo, Veterinary Faculty, Laboratory for Molecular Diagnostic and Research Laboratory                        | Goleti T., Goleti Š., Softi A., Ali-Šeho A., Jaži A., Šabi E., Nicevi M., Hodži A., Terzi I.                                                                                                                                                                                                                                                                                                                                            |
| EPI_ISL_955165, EPI_ISL_955166, EPI_ISL_955167, EPI_ISL_955168                                                                                                                                                                                                                                                                                                                                                                                                                                                                                                                                                                                                                                                                                                                                                                                                                                                                                                                                 | Institute for Biocides and Medical Ecology                                                              | Institute of microbiology and Immunology, Faculty of Medicine, University of Belgrade                                          | Knezevic,A., Jankovic,M., Vidanovic,D., Milicevic,O., Tesovic,B., Sekler,M., Jovanovic,T.                                                                                                                                                                                                                                                                                                                                               |
| EPI_ISL_955192, EPI_ISL_955194, EPI_ISL_955195, EPI_ISL_955196, EPI_ISL_955197, EPI_ISL_955199, EPI_ISL_955201, EPI_ISL_955202, EPI_ISL_955203, EPI_ISL_955204, EPI_ISL_955208                                                                                                                                                                                                                                                                                                                                                                                                                                                                                                                                                                                                                                                                                                                                                                                                                 |                                                                                                         |                                                                                                                                |                                                                                                                                                                                                                                                                                                                                                                                                                                         |
| see above                                                                                                                                                                                                                                                                                                                                                                                                                                                                                                                                                                                                                                                                                                                                                                                                                                                                                                                                                                                      | Instituto Nacional de Medicina Genómica                                                                 | Instituto Nacional de Medicina Genómica                                                                                        | Hidalgo-Miranda A, Mendoza-Vargas A, Reyes-Grajeda JP, Cisneros-Villanueva M, Cedro-Tanda A,Peñaloza-Figueroa F, Herrera-Montalvo LA                                                                                                                                                                                                                                                                                                    |
| EPI_ISL_955337, EPI_ISL_955338, EPI_ISL_955339, EPI_ISL_955341, EPI_ISL_955342, EPI_ISL_955344,                                                                                                                                                                                                                                                                                                                                                                                                                                                                                                                                                                                                                                                                                                                                                                                                                                                                                                | UC Davis- Department of Pathology and Laboratory Medicine                                               | Chan-Zuckerberg Biohub                                                                                                         | CZB Cihahub Consortium                                                                                                                                                                                                                                                                                                                                                                                                                  |

|                                                                                                                                                                                                                                                                                                                                                                                                                                                                                                                                                                                                                                                                                                                                                                                                                                                                                                                                                                                                                                                                |                                                                                                                                        |                                                                                                                                        |                                                                                                                                                                                                                                                                                                                                                                                                                                                           |
|----------------------------------------------------------------------------------------------------------------------------------------------------------------------------------------------------------------------------------------------------------------------------------------------------------------------------------------------------------------------------------------------------------------------------------------------------------------------------------------------------------------------------------------------------------------------------------------------------------------------------------------------------------------------------------------------------------------------------------------------------------------------------------------------------------------------------------------------------------------------------------------------------------------------------------------------------------------------------------------------------------------------------------------------------------------|----------------------------------------------------------------------------------------------------------------------------------------|----------------------------------------------------------------------------------------------------------------------------------------|-----------------------------------------------------------------------------------------------------------------------------------------------------------------------------------------------------------------------------------------------------------------------------------------------------------------------------------------------------------------------------------------------------------------------------------------------------------|
| EPI_ISL_955346, EPI_ISL_955348, EPI_ISL_955351, EPI_ISL_955352                                                                                                                                                                                                                                                                                                                                                                                                                                                                                                                                                                                                                                                                                                                                                                                                                                                                                                                                                                                                 |                                                                                                                                        |                                                                                                                                        |                                                                                                                                                                                                                                                                                                                                                                                                                                                           |
| EPI_ISL_955497, EPI_ISL_955500, EPI_ISL_955503, EPI_ISL_955505, EPI_ISL_955508, EPI_ISL_955510, EPI_ISL_955511, EPI_ISL_955512, EPI_ISL_955514, EPI_ISL_955515, EPI_ISL_955516, EPI_ISL_955519, EPI_ISL_955520, EPI_ISL_955523, EPI_ISL_955525, EPI_ISL_955527, EPI_ISL_955528, EPI_ISL_955531, EPI_ISL_955536                                                                                                                                                                                                                                                                                                                                                                                                                                                                                                                                                                                                                                                                                                                                                 |                                                                                                                                        |                                                                                                                                        |                                                                                                                                                                                                                                                                                                                                                                                                                                                           |
| see above                                                                                                                                                                                                                                                                                                                                                                                                                                                                                                                                                                                                                                                                                                                                                                                                                                                                                                                                                                                                                                                      | Humboldt County Public Health Laboratory                                                                                               | Chan-Zuckerberg Biohub                                                                                                                 | CZB Ciliahub Consortium                                                                                                                                                                                                                                                                                                                                                                                                                                   |
| EPI_ISL_955567, EPI_ISL_955568                                                                                                                                                                                                                                                                                                                                                                                                                                                                                                                                                                                                                                                                                                                                                                                                                                                                                                                                                                                                                                 | Santa Clara County Public Health Laboratory                                                                                            | Chan-Zuckerberg Biohub                                                                                                                 | CZB Ciliahub Consortium                                                                                                                                                                                                                                                                                                                                                                                                                                   |
| EPI_ISL_955632                                                                                                                                                                                                                                                                                                                                                                                                                                                                                                                                                                                                                                                                                                                                                                                                                                                                                                                                                                                                                                                 | Orange County Public Health Lab                                                                                                        | Chan-Zuckerberg Biohub                                                                                                                 | CZB Ciliahub Consortium                                                                                                                                                                                                                                                                                                                                                                                                                                   |
| EPI_ISL_955939, EPI_ISL_955945, EPI_ISL_955946, EPI_ISL_955947, EPI_ISL_955948, EPI_ISL_955950, EPI_ISL_955954, EPI_ISL_955955, EPI_ISL_955956, EPI_ISL_955957, EPI_ISL_955958, EPI_ISL_955959, EPI_ISL_955960, EPI_ISL_955961, EPI_ISL_955962, EPI_ISL_955963, EPI_ISL_955964, EPI_ISL_955965, EPI_ISL_955966, EPI_ISL_955967, EPI_ISL_955968, EPI_ISL_955969, EPI_ISL_955970, EPI_ISL_955971, EPI_ISL_955976, EPI_ISL_955977, EPI_ISL_955978, EPI_ISL_955979, EPI_ISL_955980, EPI_ISL_959480, EPI_ISL_959481, EPI_ISL_959482, EPI_ISL_959483, EPI_ISL_959484, EPI_ISL_959485, EPI_ISL_959487, EPI_ISL_959490, EPI_ISL_959491, EPI_ISL_959492, EPI_ISL_959493, EPI_ISL_959494, EPI_ISL_959495, EPI_ISL_959496, EPI_ISL_959500, EPI_ISL_959506, EPI_ISL_959508, EPI_ISL_959509, EPI_ISL_959510, EPI_ISL_959511, EPI_ISL_959514, EPI_ISL_959515, EPI_ISL_959516, EPI_ISL_959517, EPI_ISL_959518, EPI_ISL_959519, EPI_ISL_959520, EPI_ISL_959521, EPI_ISL_959522, EPI_ISL_959523, EPI_ISL_959524, EPI_ISL_959525, EPI_ISL_959527, EPI_ISL_959528, EPI_ISL_959529 | Division of Emerging Infectious Diseases, Bureau of Infectious Diseases Diagnosis Control, Korea Disease Control and Prevention Agency | Division of Emerging Infectious Diseases, Bureau of Infectious Diseases Diagnosis Control, Korea Disease Control and Prevention Agency | Ae Kyung Park, Il-Hwan Kim, Heui Man Kim, Jeong-Min Kim, Namjoo Lee, Chae Young Lee, Sang Hee Woo, Eun-Jin Kim                                                                                                                                                                                                                                                                                                                                            |
| see above                                                                                                                                                                                                                                                                                                                                                                                                                                                                                                                                                                                                                                                                                                                                                                                                                                                                                                                                                                                                                                                      | Division of Emerging Infectious Diseases, Bureau of Infectious Diseases Diagnosis Control, Korea Disease Control and Prevention Agency | Division of Emerging Infectious Diseases, Bureau of Infectious Diseases Diagnosis Control, Korea Disease Control and Prevention Agency |                                                                                                                                                                                                                                                                                                                                                                                                                                                           |
| EPI_ISL_962107                                                                                                                                                                                                                                                                                                                                                                                                                                                                                                                                                                                                                                                                                                                                                                                                                                                                                                                                                                                                                                                 | Illinois Department of Public Health                                                                                                   | Gagnon Lab, Southern Illinois University                                                                                               | Keith Gagnon                                                                                                                                                                                                                                                                                                                                                                                                                                              |
| EPI_ISL_962609, EPI_ISL_962614, EPI_ISL_962616, EPI_ISL_962771, EPI_ISL_962775, EPI_ISL_962781, EPI_ISL_962789, EPI_ISL_962794, EPI_ISL_962798, EPI_ISL_962804                                                                                                                                                                                                                                                                                                                                                                                                                                                                                                                                                                                                                                                                                                                                                                                                                                                                                                 | San Diego County Public Health Laboratory                                                                                              | Andersen lab at Scripps Research                                                                                                       | SEARCH Alliance San Diego with Tracy Basler, Jovan Shephard, Brett Austin                                                                                                                                                                                                                                                                                                                                                                                 |
| EPI_ISL_962892                                                                                                                                                                                                                                                                                                                                                                                                                                                                                                                                                                                                                                                                                                                                                                                                                                                                                                                                                                                                                                                 | ULSS 03 Venezia                                                                                                                        | Istituto Zooprofilattico Sperimentale delle Venezie                                                                                    | Natale Alda, Mazzotta Elisa, Mason Nicoletta, Ceglie Letizia, Lucchese L., Stefani Annalisa, Bonfante Francesco, Bortolami Alessio, Fincato Alice, Monne Isabella, Bellinati Laura, Mion Monica, Guadagno Carmine, Quaranta Erika, Pastori Ambra, Terregino Calogero                                                                                                                                                                                      |
| EPI_ISL_978522, EPI_ISL_978529, EPI_ISL_978531, EPI_ISL_978532                                                                                                                                                                                                                                                                                                                                                                                                                                                                                                                                                                                                                                                                                                                                                                                                                                                                                                                                                                                                 | Central Public Health Laboratory - LACEN -Bahia, Salvador, Brazil                                                                      | Central Public Health Laboratory - LACEN -Bahia, Salvador, Brazil                                                                      | Stephane Tosta, Luciana Oliveira, Vanessa Nardy, Patricia Cajado, Marcela Gómez, Breno Dominguez, Jaqueline Gomes, Wagner Fonseca, Marta Giovanetti, Luiz Alcantara, Felicidade Pereira, Arabela Leal                                                                                                                                                                                                                                                     |
| EPI_ISL_981176                                                                                                                                                                                                                                                                                                                                                                                                                                                                                                                                                                                                                                                                                                                                                                                                                                                                                                                                                                                                                                                 | Johns Hopkins Hospital Department of Pathology                                                                                         | Johns Hopkins Hospital Department of Pathology                                                                                         | C. Paul Morris, Chun Huai Luo, Adannaya Amadi, Matthew Schwartz, Nicholas Gallagher, Heba H. Mostafa                                                                                                                                                                                                                                                                                                                                                      |
| EPI_ISL_982903                                                                                                                                                                                                                                                                                                                                                                                                                                                                                                                                                                                                                                                                                                                                                                                                                                                                                                                                                                                                                                                 | MEPHI Aix Marseille University (AMU)                                                                                                   | MEPHI Aix Marseille University (AMU)                                                                                                   | Anthony LEVASSEUR                                                                                                                                                                                                                                                                                                                                                                                                                                         |
| EPI_ISL_983699, EPI_ISL_983700, EPI_ISL_983701                                                                                                                                                                                                                                                                                                                                                                                                                                                                                                                                                                                                                                                                                                                                                                                                                                                                                                                                                                                                                 | Essentia Health-St. Mary's Medical Center                                                                                              | Minnesota Department of Health, Public Health Laboratory                                                                               | Alexandra Lorentz, Jacob Garfin, Matt Plumb, and Xiong Wang                                                                                                                                                                                                                                                                                                                                                                                               |
| EPI_ISL_984563, EPI_ISL_984564, EPI_ISL_984570, EPI_ISL_984571, EPI_ISL_984574, EPI_ISL_984575, EPI_ISL_984579, EPI_ISL_984581                                                                                                                                                                                                                                                                                                                                                                                                                                                                                                                                                                                                                                                                                                                                                                                                                                                                                                                                 | California Department of Public Health                                                                                                 | Chiu Laboratory, University of California, San Francisco                                                                               | Charles Chiu, Xianding (Wayne) Deng, Candace Wang, Venice Servellita, Jill Hacker, Debra Wadford                                                                                                                                                                                                                                                                                                                                                          |
| EPI_ISL_984737, EPI_ISL_984739, EPI_ISL_984749, EPI_ISL_984751                                                                                                                                                                                                                                                                                                                                                                                                                                                                                                                                                                                                                                                                                                                                                                                                                                                                                                                                                                                                 | Gazi University Faculty of Medicine, Medical Virology Laboratory                                                                       | Gazi University Faculty of Medicine, Medical Virology Laboratory                                                                       | Erdem ahin, Gülendam Bozday, Hager Muftah, Selin Yiit, Shaknoza Sarzhanova, Özlem Güzel Tunçcan, Murat Dizbay, Il Fidan, Kayhan Çalar                                                                                                                                                                                                                                                                                                                     |
| EPI_ISL_984756                                                                                                                                                                                                                                                                                                                                                                                                                                                                                                                                                                                                                                                                                                                                                                                                                                                                                                                                                                                                                                                 | Pandemic Response Lab - NYC                                                                                                            | Pandemic Response Lab, R&D                                                                                                             | Henry Lee, Michael Hammerling, Melissa Hopkins, Cybill del Castillo, William Ward, Pradeep Bugga, Haiping Hao, Jon Laurent                                                                                                                                                                                                                                                                                                                                |
| EPI_ISL_989990, EPI_ISL_989993                                                                                                                                                                                                                                                                                                                                                                                                                                                                                                                                                                                                                                                                                                                                                                                                                                                                                                                                                                                                                                 | Lighthouse Lab in Glasgow                                                                                                              | Wellcome Sanger Institute for the COVID-19 Genomics UK (COG-UK) Consortium                                                             | Harper VanSteenhouse, Yumi Kasai, David Gray, Carol Clugston, Anna Dominiczak and Alex Alderton, Roberto Amato, Sonia Goncalves, Ewan Harrison, David K. Jackson, Ian Johnston, Dominic Kwiatkowski, Cordelia Langford, John Sillitoe on behalf of the Wellcome Sanger Institute COVID-19 Surveillance Team                                                                                                                                               |
| EPI_ISL_991309, EPI_ISL_991310, EPI_ISL_991311, EPI_ISL_991312, EPI_ISL_991313, EPI_ISL_991314, EPI_ISL_991315, EPI_ISL_991320, EPI_ISL_991321, EPI_ISL_991323, EPI_ISL_991325, EPI_ISL_991326, EPI_ISL_991327, EPI_ISL_991328, EPI_ISL_991329, EPI_ISL_991330, EPI_ISL_991331, EPI_ISL_991332, EPI_ISL_991333, EPI_ISL_991334, EPI_ISL_991336, EPI_ISL_991339, EPI_ISL_991340, EPI_ISL_991343, EPI_ISL_991344, EPI_ISL_991345, EPI_ISL_991347, EPI_ISL_991348, EPI_ISL_991349, EPI_ISL_991350                                                                                                                                                                                                                                                                                                                                                                                                                                                                                                                                                                 | Lighthouse Lab in Alderley Park                                                                                                        | Wellcome Sanger Institute for the COVID-19 Genomics UK (COG-UK) Consortium                                                             | Jacquelyn Wynn, Mairead Hyland, The Lighthouse Lab in Alderley Park and Alex Alderton, Roberto Amato, Sonia Goncalves, Ewan Harrison, David K. Jackson, Ian Johnston, Dominic Kwiatkowski, Cordelia Langford, John Sillitoe on behalf of the Wellcome Sanger Institute COVID-19 Surveillance Team                                                                                                                                                         |
| EPI_ISL_994668, EPI_ISL_994674, EPI_ISL_994676, EPI_ISL_994677, EPI_ISL_994678, EPI_ISL_994679, EPI_ISL_994680, EPI_ISL_994682, EPI_ISL_994695, EPI_ISL_994704, EPI_ISL_994711, EPI_ISL_994735, EPI_ISL_994736, EPI_ISL_994737, EPI_ISL_994738                                                                                                                                                                                                                                                                                                                                                                                                                                                                                                                                                                                                                                                                                                                                                                                                                 | Division of Emerging Infectious Diseases, Bureau of Infectious Diseases Diagnosis Control, Korea Disease Control and Prevention Agency | Division of Emerging Infectious Diseases, Bureau of Infectious Diseases Diagnosis Control, Korea Disease Control and Prevention Agency | Ae Kyung Park, Il-Hwan Kim, Heui Man Kim, Jeong-Min Kim, Namjoo Lee, Chae Young Lee, Sang Hee Woo, Eun-Jin Kim                                                                                                                                                                                                                                                                                                                                            |
| EPI_ISL_997121                                                                                                                                                                                                                                                                                                                                                                                                                                                                                                                                                                                                                                                                                                                                                                                                                                                                                                                                                                                                                                                 | Virology Department, Royal Infirmary of Edinburgh, NHS Lothian / School of Biological Sciences, University of Edinburgh                | COVID-19 Genomics UK (COG-UK) Consortium                                                                                               | McHugh M, Dewar R, Cotton S, Rooke S, O'Toole Á, Scher E, Hill V, McCrone JT, Colquhoun R, Yu X, Jackson B, Rambaut A, Templeton K                                                                                                                                                                                                                                                                                                                        |
| EPI_ISL_997315, EPI_ISL_997317, EPI_ISL_997321                                                                                                                                                                                                                                                                                                                                                                                                                                                                                                                                                                                                                                                                                                                                                                                                                                                                                                                                                                                                                 | University of Exeter                                                                                                                   | COVID-19 Genomics UK (COG-UK) Consortium                                                                                               | Ben Temperton, Aaron Jeffries, Michelle Michelsen, Joanna Warwick-Dugdale, Audrey Farbos, Robyn Manley, Stephen Michell, Jane Masoli                                                                                                                                                                                                                                                                                                                      |
| EPI_ISL_998822                                                                                                                                                                                                                                                                                                                                                                                                                                                                                                                                                                                                                                                                                                                                                                                                                                                                                                                                                                                                                                                 | Quadram Institute Bioscience                                                                                                           | COVID-19 Genomics UK (COG-UK) Consortium                                                                                               | Dave J. Baker, Gemma L. Kay, Alp Aydin, Thanh Le-Viet, Steven Rudder, Ana P. Tedim, Anastasia Kolyva, Maria Diaz, Leonardo de Oliveira Martins, Nabil-Fareed Alikhan, Lizzie Meadows, Rachael Stanley, Ngozi Elumogo, Muhammed Yasir, Nicholas M. Thomson, Alexander J Trotter, Rachel Gilroy, Samuel Bloomfield, Claire Stuart, Andrew Bell, Reenesh Prakash, Samir Dervisevic, Alison E. Mather, John Wain, Mark Webber, Andrew J. Page, Justin O'Grady |

We gratefully acknowledge the following Authors from the Originating laboratories responsible for obtaining the specimens, as well as the Submitting laboratories where the genome data were generated and shared via GISAID, on which this research is based.

All Submitters of data may be contacted directly via [www.gisaid.org](http://www.gisaid.org)

Authors are sorted alphabetically.

| Accession ID                                                                                                                                                                                                                                                                                                                                                                                                                                                                                                                                                                                                                                                                                                                                                                                                                                                                                                                                                                                                                                                                                                                                                                                                                                                                                                                                                                                                                                                                                                                                                                                                                                                                                                                                                                                                                                                                                                                                                                                                                                                                                                                                                                                                                                  | Originating Laboratory                                                                                                                                                                     | Submitting Laboratory                                                                                                  | Authors                                                                                                                                                                                                                                                                                                                                                                                                                                                                  |
|-----------------------------------------------------------------------------------------------------------------------------------------------------------------------------------------------------------------------------------------------------------------------------------------------------------------------------------------------------------------------------------------------------------------------------------------------------------------------------------------------------------------------------------------------------------------------------------------------------------------------------------------------------------------------------------------------------------------------------------------------------------------------------------------------------------------------------------------------------------------------------------------------------------------------------------------------------------------------------------------------------------------------------------------------------------------------------------------------------------------------------------------------------------------------------------------------------------------------------------------------------------------------------------------------------------------------------------------------------------------------------------------------------------------------------------------------------------------------------------------------------------------------------------------------------------------------------------------------------------------------------------------------------------------------------------------------------------------------------------------------------------------------------------------------------------------------------------------------------------------------------------------------------------------------------------------------------------------------------------------------------------------------------------------------------------------------------------------------------------------------------------------------------------------------------------------------------------------------------------------------|--------------------------------------------------------------------------------------------------------------------------------------------------------------------------------------------|------------------------------------------------------------------------------------------------------------------------|--------------------------------------------------------------------------------------------------------------------------------------------------------------------------------------------------------------------------------------------------------------------------------------------------------------------------------------------------------------------------------------------------------------------------------------------------------------------------|
| EPI_ISL_1001236, EPI_ISL_1001242, EPI_ISL_1001249, EPI_ISL_1001250, EPI_ISL_1001251, EPI_ISL_1001253, EPI_ISL_1001254, EPI_ISL_1001255, EPI_ISL_1001256, EPI_ISL_1001257, EPI_ISL_1001258, EPI_ISL_1001259                                                                                                                                                                                                                                                                                                                                                                                                                                                                                                                                                                                                                                                                                                                                                                                                                                                                                                                                                                                                                                                                                                                                                                                                                                                                                                                                                                                                                                                                                                                                                                                                                                                                                                                                                                                                                                                                                                                                                                                                                                    |                                                                                                                                                                                            |                                                                                                                        |                                                                                                                                                                                                                                                                                                                                                                                                                                                                          |
| see above                                                                                                                                                                                                                                                                                                                                                                                                                                                                                                                                                                                                                                                                                                                                                                                                                                                                                                                                                                                                                                                                                                                                                                                                                                                                                                                                                                                                                                                                                                                                                                                                                                                                                                                                                                                                                                                                                                                                                                                                                                                                                                                                                                                                                                     | National Virus Reference Laboratory                                                                                                                                                        | National Virus Reference Laboratory                                                                                    | Michael Carr, Gabriel Gonzalez, Zoe Yandle, Jonathan Dean, Cillian F De Gascun                                                                                                                                                                                                                                                                                                                                                                                           |
| EPI_ISL_1002357                                                                                                                                                                                                                                                                                                                                                                                                                                                                                                                                                                                                                                                                                                                                                                                                                                                                                                                                                                                                                                                                                                                                                                                                                                                                                                                                                                                                                                                                                                                                                                                                                                                                                                                                                                                                                                                                                                                                                                                                                                                                                                                                                                                                                               | Viollier AG                                                                                                                                                                                | Department of Biosystems Science and Engineering, ETH Zürich                                                           | Chaoran Chen, Sarah Nadeau, Catharine Aquino, Ivan Topolsky, Philipp Jablonski, Lara Fuhrmann, David Dreifuss, Katharina Jahn, Andreia Cabral de Gouvea, Maria Domenica Moccia, Simon Grüter, Timothy Sykes, Lennart Opitz, Griffin White, Laura Neff, Doris Popovic, Andrea Patrignani, Jay Tracy, Ralph Schlapbach, Christiane Beckmann, Maurice Redondo, Olivier Kobel, Christoph Noppen, Sophie Seidel, Noemie Santamaria de Souza, Niko Beerenwinkel, Tanja Stadler |
| EPI_ISL_1004713, EPI_ISL_1004714, EPI_ISL_1004716, EPI_ISL_1004717, EPI_ISL_1004718, EPI_ISL_1004719, EPI_ISL_1004720, EPI_ISL_1004722, EPI_ISL_1004723, EPI_ISL_1004724, EPI_ISL_1004725, EPI_ISL_1004726, EPI_ISL_1004727, EPI_ISL_1004729, EPI_ISL_1004730, EPI_ISL_1004734, EPI_ISL_1004735, EPI_ISL_1004739, EPI_ISL_1004740, EPI_ISL_1004741, EPI_ISL_1004742, EPI_ISL_1004743, EPI_ISL_1004744, EPI_ISL_1004747, EPI_ISL_1004757, EPI_ISL_1004758, EPI_ISL_1004759, EPI_ISL_1004760, EPI_ISL_1004761, EPI_ISL_1004762, EPI_ISL_1004764, EPI_ISL_1004765, EPI_ISL_1004766, EPI_ISL_1004767, EPI_ISL_1004768, EPI_ISL_1004771, EPI_ISL_1004772, EPI_ISL_1004773, EPI_ISL_1004775, EPI_ISL_1004777, EPI_ISL_1004778, EPI_ISL_1004779, EPI_ISL_1004780, EPI_ISL_1004781, EPI_ISL_1004782, EPI_ISL_1004783, EPI_ISL_1004784, EPI_ISL_1004788, EPI_ISL_1004789, EPI_ISL_1004792, EPI_ISL_1004793, EPI_ISL_1004794, EPI_ISL_1004795, EPI_ISL_1004797, EPI_ISL_1004798, EPI_ISL_1004799, EPI_ISL_1004800, EPI_ISL_1004801, EPI_ISL_1004802, EPI_ISL_1004804, EPI_ISL_1004816, EPI_ISL_1004818, EPI_ISL_1004823, EPI_ISL_1004824, EPI_ISL_1004825, EPI_ISL_1004826, EPI_ISL_1004827, EPI_ISL_1004829, EPI_ISL_1004830, EPI_ISL_1004832, EPI_ISL_1004833, EPI_ISL_1004834, EPI_ISL_1004836, EPI_ISL_1004838, EPI_ISL_1004839, EPI_ISL_1004840, EPI_ISL_1004841, EPI_ISL_1004844, EPI_ISL_1004847, EPI_ISL_1004849, EPI_ISL_1004853, EPI_ISL_1004854, EPI_ISL_1004855, EPI_ISL_1004856, EPI_ISL_1004859, EPI_ISL_1004860, EPI_ISL_1004863, EPI_ISL_1004864, EPI_ISL_1004865, EPI_ISL_1004870, EPI_ISL_1004871, EPI_ISL_1004874, EPI_ISL_1004901, EPI_ISL_1004905, EPI_ISL_1004906, EPI_ISL_1004907, EPI_ISL_1004909, EPI_ISL_1004911, EPI_ISL_1004917, EPI_ISL_1004918, EPI_ISL_1004919, EPI_ISL_1004924, EPI_ISL_1004927, EPI_ISL_1004928, EPI_ISL_1004932, EPI_ISL_1004934, EPI_ISL_1004936, EPI_ISL_1004938, EPI_ISL_1004941, EPI_ISL_1004942, EPI_ISL_1004944, EPI_ISL_1004945, EPI_ISL_1004946, EPI_ISL_1004947, EPI_ISL_1004948, EPI_ISL_1004949, EPI_ISL_1004950, EPI_ISL_1004952, EPI_ISL_1004954, EPI_ISL_1004955, EPI_ISL_1004956, EPI_ISL_1004961, EPI_ISL_1004964, EPI_ISL_1004966, EPI_ISL_1004969, EPI_ISL_1004973, EPI_ISL_1004975 |                                                                                                                                                                                            |                                                                                                                        |                                                                                                                                                                                                                                                                                                                                                                                                                                                                          |
| see above                                                                                                                                                                                                                                                                                                                                                                                                                                                                                                                                                                                                                                                                                                                                                                                                                                                                                                                                                                                                                                                                                                                                                                                                                                                                                                                                                                                                                                                                                                                                                                                                                                                                                                                                                                                                                                                                                                                                                                                                                                                                                                                                                                                                                                     | Viollier AG                                                                                                                                                                                | Department of Biosystems Science and Engineering, ETH Zürich                                                           | Chaoran Chen, Sarah Nadeau, Ivan Topolsky, Emmanouil Dermitzakis, Keith Harshman, Ioannis Xenarios, Henri Pegeot, Lorenzo Cerutti, Deborah Penet, Philipp Jablonski, Lara Fuhrmann, David Dreifuss, Katharina Jahn, Christiane Beckmann, Maurice Redondo, Olivier Kobel, Christoph Noppen, Sophie Seidel, Noemie Santamaria de Souza, Niko Beerenwinkel, Tanja Stadler                                                                                                   |
| EPI_ISL_1005560, EPI_ISL_1005561, EPI_ISL_1005562, EPI_ISL_1005563, EPI_ISL_1005564, EPI_ISL_1005566, EPI_ISL_1005571, EPI_ISL_1005573, EPI_ISL_1005574, EPI_ISL_1005575, EPI_ISL_1005577, EPI_ISL_1005578, EPI_ISL_1005579, EPI_ISL_1005580, EPI_ISL_1005581, EPI_ISL_1005582, EPI_ISL_1005656, EPI_ISL_1005659, EPI_ISL_1005661, EPI_ISL_1005662, EPI_ISL_1005663, EPI_ISL_1005665, EPI_ISL_1005666, EPI_ISL_1005667, EPI_ISL_1005668, EPI_ISL_1005669, EPI_ISL_1005671, EPI_ISL_1005673                                                                                                                                                                                                                                                                                                                                                                                                                                                                                                                                                                                                                                                                                                                                                                                                                                                                                                                                                                                                                                                                                                                                                                                                                                                                                                                                                                                                                                                                                                                                                                                                                                                                                                                                                    |                                                                                                                                                                                            |                                                                                                                        |                                                                                                                                                                                                                                                                                                                                                                                                                                                                          |
| see above                                                                                                                                                                                                                                                                                                                                                                                                                                                                                                                                                                                                                                                                                                                                                                                                                                                                                                                                                                                                                                                                                                                                                                                                                                                                                                                                                                                                                                                                                                                                                                                                                                                                                                                                                                                                                                                                                                                                                                                                                                                                                                                                                                                                                                     | Instituto Nacional de Medicina Genómica                                                                                                                                                    | Instituto Nacional de Medicina Genómica                                                                                | Hidalgo-Miranda A, Mendoza-Vargas A, Reyes-Grajeda JP, Cisneros-Villanueva M, Cedro-Tanda A,Peñaloza-Figueroa F, Herrera-Montalvo LA                                                                                                                                                                                                                                                                                                                                     |
| EPI_ISL_1007680, EPI_ISL_1007688, EPI_ISL_1007695                                                                                                                                                                                                                                                                                                                                                                                                                                                                                                                                                                                                                                                                                                                                                                                                                                                                                                                                                                                                                                                                                                                                                                                                                                                                                                                                                                                                                                                                                                                                                                                                                                                                                                                                                                                                                                                                                                                                                                                                                                                                                                                                                                                             | Hospital Clínico Universitario de Valladolid-Hospital Universitario Río Hortega                                                                                                            | SeqCOVID-SPAIN consortium/IBV(CSIC)                                                                                    | Antonio Orduña-Domingo, Marta Hernández, Silvia Rojo, Marta Domínguez-Gil, Carmen Aldea-Mansilla, Juan Luis Muñoz-Bellido, Mª Fe Brezmes-Valdivieso, M. Isabel Fernandez-Natal, Jose Maria Eiros and SeqCOVID-SPAIN consortium                                                                                                                                                                                                                                           |
| EPI_ISL_1007751, EPI_ISL_1007753, EPI_ISL_1007754, EPI_ISL_1007755, EPI_ISL_1007757, EPI_ISL_1007758, EPI_ISL_1007760, EPI_ISL_1007761                                                                                                                                                                                                                                                                                                                                                                                                                                                                                                                                                                                                                                                                                                                                                                                                                                                                                                                                                                                                                                                                                                                                                                                                                                                                                                                                                                                                                                                                                                                                                                                                                                                                                                                                                                                                                                                                                                                                                                                                                                                                                                        | Hospital Universitario Virgen de las Nieves de Granada-SAS                                                                                                                                 | SeqCOVID-SPAIN consortium/IBV(CSIC)                                                                                    | Sara Sanbonmatsu Gámez, Mercedes Pérez Ruiz, Irene Pedrosa Corral, José M. Navarro-Marí and SeqCOVID-SPAIN consortium                                                                                                                                                                                                                                                                                                                                                    |
| EPI_ISL_1007833                                                                                                                                                                                                                                                                                                                                                                                                                                                                                                                                                                                                                                                                                                                                                                                                                                                                                                                                                                                                                                                                                                                                                                                                                                                                                                                                                                                                                                                                                                                                                                                                                                                                                                                                                                                                                                                                                                                                                                                                                                                                                                                                                                                                                               | Servicio de Microbiología, Hospital Universitario Central de Asturias                                                                                                                      | SeqCOVID-SPAIN consortium/IBV(CSIC)                                                                                    | Cristián Castelló Abietar, Jose A. Boga, Susana Rojo-Alba, Marta Elena Álvarez-Argüelles, Santiago Melón and SeqCOVID-SPAIN consortium                                                                                                                                                                                                                                                                                                                                   |
| EPI_ISL_1007995, EPI_ISL_1007996, EPI_ISL_1007998, EPI_ISL_1007999, EPI_ISL_1008000, EPI_ISL_1008001, EPI_ISL_1008003                                                                                                                                                                                                                                                                                                                                                                                                                                                                                                                                                                                                                                                                                                                                                                                                                                                                                                                                                                                                                                                                                                                                                                                                                                                                                                                                                                                                                                                                                                                                                                                                                                                                                                                                                                                                                                                                                                                                                                                                                                                                                                                         | Klinikum Wels-Grieskirchen                                                                                                                                                                 | Berghthaler laboratory, CeMM Research Center for Molecular Medicine of the Austrian Academy of Sciences                | Lukas Endler, Anna Schedl, Thomas Penz, Benedikt Agerer, Maelle Le Moing, Michael Schuster, Bekir Erguner, Jan Laine, Martin Senekowitsch, Christoph Bock, Andreas Berghthaler                                                                                                                                                                                                                                                                                           |
| EPI_ISL_1008013, EPI_ISL_1008014, EPI_ISL_1008016                                                                                                                                                                                                                                                                                                                                                                                                                                                                                                                                                                                                                                                                                                                                                                                                                                                                                                                                                                                                                                                                                                                                                                                                                                                                                                                                                                                                                                                                                                                                                                                                                                                                                                                                                                                                                                                                                                                                                                                                                                                                                                                                                                                             | Institut für Pathologie, Salzkammergut Klinikum Vöcklabruck                                                                                                                                | Berghthaler laboratory, CeMM Research Center for Molecular Medicine of the Austrian Academy of Sciences                | Lukas Endler, Anna Schedl, Thomas Penz, Benedikt Agerer, Maelle Le Moing, Michael Schuster, Bekir Erguner, Jan Laine, Martin Senekowitsch, Christoph Bock, Andreas Berghthaler                                                                                                                                                                                                                                                                                           |
| EPI_ISL_1008109, EPI_ISL_1008112, EPI_ISL_1008113, EPI_ISL_1008114, EPI_ISL_1008115, EPI_ISL_1008116, EPI_ISL_1008117, EPI_ISL_1008118, EPI_ISL_1008120, EPI_ISL_1008121, EPI_ISL_1008123, EPI_ISL_1008124, EPI_ISL_1008125, EPI_ISL_1008129, EPI_ISL_1008130, EPI_ISL_1008131, EPI_ISL_1008133, EPI_ISL_1008134, EPI_ISL_1008136, EPI_ISL_1008137, EPI_ISL_1008138, EPI_ISL_1008139, EPI_ISL_1008140, EPI_ISL_1008141, EPI_ISL_1008142, EPI_ISL_1008143, EPI_ISL_1008144, EPI_ISL_1008145, EPI_ISL_1008146, EPI_ISL_1008148, EPI_ISL_1008151, EPI_ISL_1008153, EPI_ISL_1008157, EPI_ISL_1008158, EPI_ISL_1008160, EPI_ISL_1008161, EPI_ISL_1008162, EPI_ISL_1008163, EPI_ISL_1008164, EPI_ISL_1008165, EPI_ISL_1008170, EPI_ISL_1008171, EPI_ISL_1008172, EPI_ISL_1008173, EPI_ISL_1008174, EPI_ISL_1008175, EPI_ISL_1008176                                                                                                                                                                                                                                                                                                                                                                                                                                                                                                                                                                                                                                                                                                                                                                                                                                                                                                                                                                                                                                                                                                                                                                                                                                                                                                                                                                                                                 |                                                                                                                                                                                            |                                                                                                                        |                                                                                                                                                                                                                                                                                                                                                                                                                                                                          |
| see above                                                                                                                                                                                                                                                                                                                                                                                                                                                                                                                                                                                                                                                                                                                                                                                                                                                                                                                                                                                                                                                                                                                                                                                                                                                                                                                                                                                                                                                                                                                                                                                                                                                                                                                                                                                                                                                                                                                                                                                                                                                                                                                                                                                                                                     | Austrian Agency for Health and Food Safety (AGES)                                                                                                                                          | Berghthaler laboratory, CeMM Research Center for Molecular Medicine of the Austrian Academy of Sciences                | Lukas Endler, Anna Schedl, Thomas Penz, Benedikt Agerer, Maelle Le Moing, Michael Schuster, Bekir Erguner, Jan Laine, Martin Senekowitsch, Christoph Bock, Andreas Berghthaler                                                                                                                                                                                                                                                                                           |
| EPI_ISL_1008250, EPI_ISL_1008251, EPI_ISL_1008252, EPI_ISL_1008254, EPI_ISL_1008257, EPI_ISL_1008258, EPI_ISL_1008261, EPI_ISL_1008263, EPI_ISL_1008264, EPI_ISL_1008265, EPI_ISL_1008357, EPI_ISL_1008358, EPI_ISL_1008359, EPI_ISL_1008360, EPI_ISL_1008361, EPI_ISL_1008362, EPI_ISL_1008363, EPI_ISL_1008364, EPI_ISL_1008366, EPI_ISL_1008367, EPI_ISL_1008370, EPI_ISL_1008371, EPI_ISL_1008375                                                                                                                                                                                                                                                                                                                                                                                                                                                                                                                                                                                                                                                                                                                                                                                                                                                                                                                                                                                                                                                                                                                                                                                                                                                                                                                                                                                                                                                                                                                                                                                                                                                                                                                                                                                                                                         |                                                                                                                                                                                            |                                                                                                                        |                                                                                                                                                                                                                                                                                                                                                                                                                                                                          |
| see above                                                                                                                                                                                                                                                                                                                                                                                                                                                                                                                                                                                                                                                                                                                                                                                                                                                                                                                                                                                                                                                                                                                                                                                                                                                                                                                                                                                                                                                                                                                                                                                                                                                                                                                                                                                                                                                                                                                                                                                                                                                                                                                                                                                                                                     | Department of Laboratory Medicine, Division of Clinical Virology, University of Medicine, Vienna                                                                                           | Berghthaler laboratory, CeMM Research Center for Molecular Medicine of the Austrian Academy of Sciences                | Lukas Endler, Anna Schedl, Thomas Penz, Benedikt Agerer, Maelle Le Moing, Michael Schuster, Bekir Erguner, Jan Laine, Martin Senekowitsch, Christoph Bock, Andreas Berghthaler                                                                                                                                                                                                                                                                                           |
| EPI_ISL_1008410                                                                                                                                                                                                                                                                                                                                                                                                                                                                                                                                                                                                                                                                                                                                                                                                                                                                                                                                                                                                                                                                                                                                                                                                                                                                                                                                                                                                                                                                                                                                                                                                                                                                                                                                                                                                                                                                                                                                                                                                                                                                                                                                                                                                                               | A05 Diagnostics                                                                                                                                                                            | The Public Health Agency of Sweden                                                                                     | Anna-Malin Linde, Maria Lind Karlberg, Carlo Berg, Oskar Karlsson Lindsjö, Sofia Stamouli, Reza Advani, Mattias Haukland, Petra Holmstrom, Noura Walai, Petra Edquist, Mia Brytting, Anna Risberg, Karin Tegmark-Wisell                                                                                                                                                                                                                                                  |
| EPI_ISL_1008433, EPI_ISL_1008435, EPI_ISL_1008437                                                                                                                                                                                                                                                                                                                                                                                                                                                                                                                                                                                                                                                                                                                                                                                                                                                                                                                                                                                                                                                                                                                                                                                                                                                                                                                                                                                                                                                                                                                                                                                                                                                                                                                                                                                                                                                                                                                                                                                                                                                                                                                                                                                             | Klinisk mikrobiologi                                                                                                                                                                       | The Public Health Agency of Sweden                                                                                     | Anna-Malin Linde, Maria Lind Karlberg, Carlo Berg, Oskar Karlsson Lindsjö, Sofia Stamouli, Reza Advani, Mattias Haukland, Petra Holmstrom, Noura Walai, Petra Edquist, Mia Brytting, Anna Risberg, Karin Tegmark-Wisell                                                                                                                                                                                                                                                  |
| EPI_ISL_1008562                                                                                                                                                                                                                                                                                                                                                                                                                                                                                                                                                                                                                                                                                                                                                                                                                                                                                                                                                                                                                                                                                                                                                                                                                                                                                                                                                                                                                                                                                                                                                                                                                                                                                                                                                                                                                                                                                                                                                                                                                                                                                                                                                                                                                               | Klinisk Mikrobiologi                                                                                                                                                                       | The Public Health Agency of Sweden                                                                                     | Anna-Malin Linde, Maria Lind Karlberg, Carlo Berg, Oskar Karlsson Lindsjö, Sofia Stamouli, Reza Advani, Mattias Haukland, Petra Holmstrom, Noura Walai, Petra Edquist, Mia Brytting, Anna Risberg, Karin Tegmark-Wisell                                                                                                                                                                                                                                                  |
| EPI_ISL_1008919, EPI_ISL_1008920                                                                                                                                                                                                                                                                                                                                                                                                                                                                                                                                                                                                                                                                                                                                                                                                                                                                                                                                                                                                                                                                                                                                                                                                                                                                                                                                                                                                                                                                                                                                                                                                                                                                                                                                                                                                                                                                                                                                                                                                                                                                                                                                                                                                              | IL Department of Public Health Chicago Laboratory                                                                                                                                          | Pathogen Discovery, Respiratory Viruses Branch, Division of Viral Diseases, Centers for Disease Control and Prevention | Ying Tao, Jing Zhang, Yan Li, Krista Queen, Anna Uehara, Peter Cook, Clinton R. Paden, Haibin Wang, Suxiang Tong                                                                                                                                                                                                                                                                                                                                                         |
| EPI_ISL_1008935, EPI_ISL_1008938, EPI_ISL_1008940, EPI_ISL_1008944, EPI_ISL_1008945, EPI_ISL_1008946, EPI_ISL_1008947                                                                                                                                                                                                                                                                                                                                                                                                                                                                                                                                                                                                                                                                                                                                                                                                                                                                                                                                                                                                                                                                                                                                                                                                                                                                                                                                                                                                                                                                                                                                                                                                                                                                                                                                                                                                                                                                                                                                                                                                                                                                                                                         | Servicio de Microbiología, Laboratori Clínic Metropolitana Nord, Hospital Universitari Germans Trias i Pujol, Institut d'Investigació en Ciències de la Salut Germans Trias i Pujol (IGTP) | SeqCOVID-SPAIN consortium/IBV(CSIC)                                                                                    | Elisa Martró, Antoni E. Bordoy, Anna Not, Adrián Antuori, Anabel Fernández, Nona Romaní, Verónica Saludes, Cristina Casañ and SeqCOVID-SPAIN consortium                                                                                                                                                                                                                                                                                                                  |
| EPI_ISL_1010728                                                                                                                                                                                                                                                                                                                                                                                                                                                                                                                                                                                                                                                                                                                                                                                                                                                                                                                                                                                                                                                                                                                                                                                                                                                                                                                                                                                                                                                                                                                                                                                                                                                                                                                                                                                                                                                                                                                                                                                                                                                                                                                                                                                                                               | Department of Laboratory Medicine, National Taiwan University Hospital                                                                                                                     | Microbial Genomics Core Lab, National Taiwan University Centers of Genomic and Precision Medicine                      | Shiou-Hwei Yeh, You-Yu Lin, Ya-Yun Lai, Chiao-Ling Li, Shan-Chwen Chang, Pei-Jer Chen, Sui-Yuan Chang                                                                                                                                                                                                                                                                                                                                                                    |
| EPI_ISL_1011512, EPI_ISL_1011528                                                                                                                                                                                                                                                                                                                                                                                                                                                                                                                                                                                                                                                                                                                                                                                                                                                                                                                                                                                                                                                                                                                                                                                                                                                                                                                                                                                                                                                                                                                                                                                                                                                                                                                                                                                                                                                                                                                                                                                                                                                                                                                                                                                                              | Massachusetts General Hospital                                                                                                                                                             | Infectious Disease Program, Broad Institute of Harvard and MIT                                                         | Lemieux,J.E., Siddle,K.J., Shaw,B., Adams,G., Pierce,V., Turbett,S., Anahtar,M., Branda,J., Slater,D., Harris,J., Lin,A.E., Gladden-Young,A., Lagerborg,K., Rudy,M., DeRuff,K., Carter,A., Normandin,E., Bauer,M., Reilly,S., Tomkins-Tinch,C., Loreth,C., Chaluvasi,S., Neumann,A., Cusick,C., Chapman,S.B., Gnirke,A., Flowers,K., Cerrato,F., Birren,B.W., Gallagher,G., Smole,S., Park,D.J., MacInnis,B.L., Ryan,E., LaRoque,R., Rosenberg,E. and Sabeti,P.C.        |
| EPI_ISL_1011741, EPI_ISL_1011744, EPI_ISL_1011746                                                                                                                                                                                                                                                                                                                                                                                                                                                                                                                                                                                                                                                                                                                                                                                                                                                                                                                                                                                                                                                                                                                                                                                                                                                                                                                                                                                                                                                                                                                                                                                                                                                                                                                                                                                                                                                                                                                                                                                                                                                                                                                                                                                             | Rhode Island Department of Health                                                                                                                                                          | Infectious Disease Program, Broad Institute of Harvard and MIT                                                         | Lemieux,J.E., Siddle,K.J., Huard,R., King,E., Azevedo,K., Miller,A., Adams,G., Gladden-Young,A., Lagerborg,K., Rudy,M., DeRuff,K., Carter,A., Normandin,E., Bauer,M., Reilly,S., Tomkins-Tinch,C., Loreth,C., Chaluvasi,S., Birren,B.W., Gallagher,G., Smole,S., Park,D.J., MacInnis,B.L., and Sabeti,P.C.                                                                                                                                                               |

|                                                                                                                                                                                                                                                                                                                  |                                                                                                                                                                                                                                                                                                                                                                                                                                                                                               |                                                                                                                                                                        |                                                                                                                                                                                                                                                                                                                                                                                                                                                                                                                                                                                                                                                                                                                                                                                                                                                                                                                                                                                                   |
|------------------------------------------------------------------------------------------------------------------------------------------------------------------------------------------------------------------------------------------------------------------------------------------------------------------|-----------------------------------------------------------------------------------------------------------------------------------------------------------------------------------------------------------------------------------------------------------------------------------------------------------------------------------------------------------------------------------------------------------------------------------------------------------------------------------------------|------------------------------------------------------------------------------------------------------------------------------------------------------------------------|---------------------------------------------------------------------------------------------------------------------------------------------------------------------------------------------------------------------------------------------------------------------------------------------------------------------------------------------------------------------------------------------------------------------------------------------------------------------------------------------------------------------------------------------------------------------------------------------------------------------------------------------------------------------------------------------------------------------------------------------------------------------------------------------------------------------------------------------------------------------------------------------------------------------------------------------------------------------------------------------------|
| EPI_ISL_1013533, EPI_ISL_1013553                                                                                                                                                                                                                                                                                 | 1.AO Universitaria 'S. Giovanni di Dio e Ruggi D'Aragona, Scuola Medica Salernitana' Hospital / 2.UOC di Virologia e Microbiologia, Università della Campania 'L. Vanvitelli' / 3.AO Universitaria 'Federico II' Napoli Hospital / 4.AORN 'San Giuseppe Moscati' Avellino Hospital / 5.AO 'San Pio - presidio G. Rummo' Benevento Hospital / 6.AO 'Sant'Anna e San Sebastiano' Caserta Hospital / 7.PO 'Maria Santissima Addolorata' Eboli Hospital / 8.Biogem Istituto di Ricerche Genetiche | 1. Genome Research Center for Health (CRGS) / 2. Laboratory of Molecular Medicine and Genomics(LMMGE) / 3. Center for Research in Pure and Applied Mathematics (CRMPA) | Giorgio Giurato, Francesca Rizzo, Alessandro Weisz, Gianluigi Franci, Giovanni Nassa, Pasquale Pagliano, Roberta Tarallo, Elena Alexandrova, Ylenia D'Agostino, Carlo Ferravante, Jessica Lamberti, Viola Melone, Domenico Memoli, Valeria Mirici Cappa, Domenico Palumbo, Giovanni Pecoraro, Assunta Sellitto, Oriana Strianese, Ilaria Terenzi, Giuseppe Fenza, Aniello Gentile, Antonello Saccomanno, Sonia Amabile, Teresa Rocco, Annamaria Salvati, Emilia Vaccaro, Massimiliano Galdiero, Michele Cennamo, Giuseppe Portella, Maria Grazia Foti, Mariarosaria Ingino, Maria Landi, Maurizio Fumi, Vincenzo Rocco, Rita Greco, Vittoria Letizia, Arnolfo Petruzzello, Maddalena Schioppa, Gregorio Goffredi, Francesca Marciano, Michele Caraglia, Alessia Cossu, Marianna Scrima, Edmondo Adorisio, Morena D'Avenia, Michela Iacobellis, Rosanna Pluscio, Giorgio Dirani, Vittorio Sambri, Simona Sempri, Silvia Zanolì, Francesco Curcio, Stefania Marzinotto, Andreina Baj, Fausto Sessa. |
| EPI_ISL_1014437, EPI_ISL_1014452, EPI_ISL_1014464, EPI_ISL_1014549, EPI_ISL_1014550, EPI_ISL_1014551, EPI_ISL_1014552, EPI_ISL_1014553, EPI_ISL_1014554, EPI_ISL_1014555, EPI_ISL_1014556, EPI_ISL_1014565, EPI_ISL_1014566, EPI_ISL_1014567, EPI_ISL_1014568, EPI_ISL_1014569, EPI_ISL_1014570, EPI_ISL_1014571 |                                                                                                                                                                                                                                                                                                                                                                                                                                                                                               |                                                                                                                                                                        |                                                                                                                                                                                                                                                                                                                                                                                                                                                                                                                                                                                                                                                                                                                                                                                                                                                                                                                                                                                                   |
| see above                                                                                                                                                                                                                                                                                                        | Dutch COVID-19 response team                                                                                                                                                                                                                                                                                                                                                                                                                                                                  | National Institute for Public Health and the Environment (RIVM)                                                                                                        | Adam Meijer, Harry Vennema, Dirk Eggink, Jeroen Cremer, Sharon van den Brink, Bas van der Veer, AnneMarie van den Brandt, Florian Zwagemaker, Dennis Schmitz, Chantal Reusken, on behalf of the national COVID-19 response team                                                                                                                                                                                                                                                                                                                                                                                                                                                                                                                                                                                                                                                                                                                                                                   |
| EPI_ISL_1014685                                                                                                                                                                                                                                                                                                  | National Influenza Center, Virology Department                                                                                                                                                                                                                                                                                                                                                                                                                                                | National Influenza Center                                                                                                                                              | K Sadeghi, A Nejati, J Yavarian, NZ Shafiei Jandaghi, V Salimi, F Ajaminejad,N Ghavvami and T Mokhtari Azad                                                                                                                                                                                                                                                                                                                                                                                                                                                                                                                                                                                                                                                                                                                                                                                                                                                                                       |
| EPI_ISL_1014686                                                                                                                                                                                                                                                                                                  | National Influenza Center, Virology Department                                                                                                                                                                                                                                                                                                                                                                                                                                                | National Influenza Center                                                                                                                                              | NZ Shafiei Jandaghi, V Salimi, A Nejati, K Sadeghi, J Yavarian, N Ghavvami,F Ajaminejad and T Mokhtari Azad                                                                                                                                                                                                                                                                                                                                                                                                                                                                                                                                                                                                                                                                                                                                                                                                                                                                                       |
| EPI_ISL_1015205, EPI_ISL_1015206, EPI_ISL_1015208                                                                                                                                                                                                                                                                | Department of Virology, Pitié-Salpêtrière hospital                                                                                                                                                                                                                                                                                                                                                                                                                                            | Department of Virology, Pitié-Salpêtrière hospital                                                                                                                     | Valentin Leducq, Aude Jary, Karen Zafilaza, Stéphane Marot, Vincent Calvez, Anne-Geneviève Marcelin                                                                                                                                                                                                                                                                                                                                                                                                                                                                                                                                                                                                                                                                                                                                                                                                                                                                                               |
| EPI_ISL_1015363                                                                                                                                                                                                                                                                                                  | Kingston Health Sciences Centre and Queen's University                                                                                                                                                                                                                                                                                                                                                                                                                                        | Ontario Institute for Cancer Research                                                                                                                                  | Prameet M. Sheth,Calvin Sjaarda,Robert Colautti,Katya Douchant,Ilinca Lungu,Bernard Lam,Jeremy Johns,Paul Krzyzanowski,Richard de Borja,Felicia Vincelli,Philip Zuzarte,Jared T. Simpson                                                                                                                                                                                                                                                                                                                                                                                                                                                                                                                                                                                                                                                                                                                                                                                                          |
| EPI_ISL_1015379                                                                                                                                                                                                                                                                                                  | Biology Lab, HIA STE-ANNE                                                                                                                                                                                                                                                                                                                                                                                                                                                                     | IRBA, 2MI                                                                                                                                                              | GORGE O., NOLENT F., SARILAR V., JANVIER F.                                                                                                                                                                                                                                                                                                                                                                                                                                                                                                                                                                                                                                                                                                                                                                                                                                                                                                                                                       |
| EPI_ISL_1015726                                                                                                                                                                                                                                                                                                  | Arizona State Public Health Laboratory                                                                                                                                                                                                                                                                                                                                                                                                                                                        | Arizona State Public Health Laboratory                                                                                                                                 | Trung Huynh, Jessica Escobar, Katherine Fullerton, Nobuko Fukushima, Stacy White, Linda Getsinger, Victor Waddell                                                                                                                                                                                                                                                                                                                                                                                                                                                                                                                                                                                                                                                                                                                                                                                                                                                                                 |
| EPI_ISL_1016405, EPI_ISL_1016406, EPI_ISL_1016410, EPI_ISL_1016411                                                                                                                                                                                                                                               | MEMORIAL SLOAN KETTERING CANCER CENTER                                                                                                                                                                                                                                                                                                                                                                                                                                                        | Wadsworth Center, New York State Department of Health                                                                                                                  | Kirsten St. George, Daryl M. Lamson, Alexis Russel, Matthew Shudt, Melissa A Leisner, Jonathan Plitnick, Navjot Singh, John Kelly, Erasmus Schneider, Erica Lasek-Nesselquist                                                                                                                                                                                                                                                                                                                                                                                                                                                                                                                                                                                                                                                                                                                                                                                                                     |
| EPI_ISL_1016690                                                                                                                                                                                                                                                                                                  | University of Sarajevo, Veterinary Faculty, Laboratory for Molecular Diagnostic and Research Laboratory                                                                                                                                                                                                                                                                                                                                                                                       | University of Sarajevo, Veterinary Faculty, Laboratory for Molecular Diagnostic and Research Laboratory                                                                | Goletic T., Goletic S., Softic A., Alic-Seho A., Sabic E., Terzic I., Jazic A., Nicevic M., Hodzic A.                                                                                                                                                                                                                                                                                                                                                                                                                                                                                                                                                                                                                                                                                                                                                                                                                                                                                             |
| EPI_ISL_1016891, EPI_ISL_1016892, EPI_ISL_1016893, EPI_ISL_1016894, EPI_ISL_1016897, EPI_ISL_1016898, EPI_ISL_1016901, EPI_ISL_1016902, EPI_ISL_1016903, EPI_ISL_1016904, EPI_ISL_1016905, EPI_ISL_1016906, EPI_ISL_1016907, EPI_ISL_1016908, EPI_ISL_1016909, EPI_ISL_1016910, EPI_ISL_1016911, EPI_ISL_1016912 |                                                                                                                                                                                                                                                                                                                                                                                                                                                                                               |                                                                                                                                                                        |                                                                                                                                                                                                                                                                                                                                                                                                                                                                                                                                                                                                                                                                                                                                                                                                                                                                                                                                                                                                   |
| see above                                                                                                                                                                                                                                                                                                        | Arizona State Public Health Laboratory                                                                                                                                                                                                                                                                                                                                                                                                                                                        | Arizona State Public Health Laboratory                                                                                                                                 | Trung Huynh, Jessica Escobar, Katherine Fullerton, Nobuko Fukushima, Stacy White, Linda Getsinger, Victor Waddell                                                                                                                                                                                                                                                                                                                                                                                                                                                                                                                                                                                                                                                                                                                                                                                                                                                                                 |
| EPI_ISL_1016963, EPI_ISL_1016965                                                                                                                                                                                                                                                                                 | UNMC Emerging Pathogens Laboratory                                                                                                                                                                                                                                                                                                                                                                                                                                                            | UNMC COVID-19 Response Team                                                                                                                                            | UNMC COVID-19 Response Team                                                                                                                                                                                                                                                                                                                                                                                                                                                                                                                                                                                                                                                                                                                                                                                                                                                                                                                                                                       |
| EPI_ISL_1017052, EPI_ISL_1017058                                                                                                                                                                                                                                                                                 | Providence St. Joseph Health Orange - Chapman                                                                                                                                                                                                                                                                                                                                                                                                                                                 | Providence St. Joseph Health Molecular Genomics Laboratory                                                                                                             | Alexa K Dowdell, Brian D Piening, Fred L Robinson, Carlo B Bifulco, Mary Campbell                                                                                                                                                                                                                                                                                                                                                                                                                                                                                                                                                                                                                                                                                                                                                                                                                                                                                                                 |
| EPI_ISL_1017059, EPI_ISL_1017060, EPI_ISL_1017061, EPI_ISL_1017062, EPI_ISL_1017063                                                                                                                                                                                                                              | Providence Saint Joseph Medical Center - Burbank                                                                                                                                                                                                                                                                                                                                                                                                                                              | Providence St. Joseph Health Molecular Genomics Laboratory                                                                                                             | Alexa K Dowdell, Brian D Piening, Fred L Robinson, Carlo B Bifulco, Mary Campbell                                                                                                                                                                                                                                                                                                                                                                                                                                                                                                                                                                                                                                                                                                                                                                                                                                                                                                                 |
| EPI_ISL_1017075, EPI_ISL_1017076, EPI_ISL_1017077, EPI_ISL_1017078, EPI_ISL_1017079, EPI_ISL_1017080, EPI_ISL_1017081, EPI_ISL_1017082, EPI_ISL_1017083, EPI_ISL_1017084, EPI_ISL_1017085, EPI_ISL_1017086, EPI_ISL_1017087, EPI_ISL_1017088, EPI_ISL_1017089                                                    |                                                                                                                                                                                                                                                                                                                                                                                                                                                                                               |                                                                                                                                                                        |                                                                                                                                                                                                                                                                                                                                                                                                                                                                                                                                                                                                                                                                                                                                                                                                                                                                                                                                                                                                   |
| see above                                                                                                                                                                                                                                                                                                        | Providence St. Joseph Health Orange - Chapman                                                                                                                                                                                                                                                                                                                                                                                                                                                 | Providence St. Joseph Health Molecular Genomics Laboratory                                                                                                             | Alexa K Dowdell, Brian D Piening, Fred L Robinson, Carlo B Bifulco, Mary Campbell                                                                                                                                                                                                                                                                                                                                                                                                                                                                                                                                                                                                                                                                                                                                                                                                                                                                                                                 |
| EPI_ISL_1017090                                                                                                                                                                                                                                                                                                  | Providence Oregon Regional Laboratories                                                                                                                                                                                                                                                                                                                                                                                                                                                       | Providence St. Joseph Health Molecular Genomics Laboratory                                                                                                             | Alexa K Dowdell, Brian D Piening, Fred L Robinson, Carlo B Bifulco, Mary Campbell                                                                                                                                                                                                                                                                                                                                                                                                                                                                                                                                                                                                                                                                                                                                                                                                                                                                                                                 |
| EPI_ISL_1017091, EPI_ISL_1017092, EPI_ISL_1017093, EPI_ISL_1017094, EPI_ISL_1017095                                                                                                                                                                                                                              | Providence St. Joseph Health Orange - Chapman                                                                                                                                                                                                                                                                                                                                                                                                                                                 | Providence St. Joseph Health Molecular Genomics Laboratory                                                                                                             | Alexa K Dowdell, Brian D Piening, Fred L Robinson, Carlo B Bifulco, Mary Campbell                                                                                                                                                                                                                                                                                                                                                                                                                                                                                                                                                                                                                                                                                                                                                                                                                                                                                                                 |
| EPI_ISL_1017096                                                                                                                                                                                                                                                                                                  | Providence Oregon Regional Laboratories                                                                                                                                                                                                                                                                                                                                                                                                                                                       | Providence St. Joseph Health Molecular Genomics Laboratory                                                                                                             | Alexa K Dowdell, Brian D Piening, Fred L Robinson, Carlo B Bifulco, Mary Campbell                                                                                                                                                                                                                                                                                                                                                                                                                                                                                                                                                                                                                                                                                                                                                                                                                                                                                                                 |
| EPI_ISL_1017097, EPI_ISL_1017098, EPI_ISL_1017099                                                                                                                                                                                                                                                                | Providence Saint Joseph Medical Center - Burbank                                                                                                                                                                                                                                                                                                                                                                                                                                              | Providence St. Joseph Health Molecular Genomics Laboratory                                                                                                             | Alexa K Dowdell, Brian D Piening, Fred L Robinson, Carlo B Bifulco, Mary Campbell                                                                                                                                                                                                                                                                                                                                                                                                                                                                                                                                                                                                                                                                                                                                                                                                                                                                                                                 |
| EPI_ISL_1017100, EPI_ISL_1017101, EPI_ISL_1017102, EPI_ISL_1017103, EPI_ISL_1017104, EPI_ISL_1017105                                                                                                                                                                                                             | Providence Oregon Regional Laboratories                                                                                                                                                                                                                                                                                                                                                                                                                                                       | Providence St. Joseph Health Molecular Genomics Laboratory                                                                                                             | Alexa K Dowdell, Brian D Piening, Fred L Robinson, Carlo B Bifulco, Mary Campbell                                                                                                                                                                                                                                                                                                                                                                                                                                                                                                                                                                                                                                                                                                                                                                                                                                                                                                                 |
| EPI_ISL_1017106                                                                                                                                                                                                                                                                                                  | Providence St. Joseph Health Orange - Chapman                                                                                                                                                                                                                                                                                                                                                                                                                                                 | Providence St. Joseph Health Molecular Genomics Laboratory                                                                                                             | Alexa K Dowdell, Brian D Piening, Fred L Robinson, Carlo B Bifulco, Mary Campbell                                                                                                                                                                                                                                                                                                                                                                                                                                                                                                                                                                                                                                                                                                                                                                                                                                                                                                                 |
| EPI_ISL_1017107                                                                                                                                                                                                                                                                                                  | Providence Oregon Regional Laboratories                                                                                                                                                                                                                                                                                                                                                                                                                                                       | Providence St. Joseph Health Molecular Genomics Laboratory                                                                                                             | Alexa K Dowdell, Brian D Piening, Fred L Robinson, Carlo B Bifulco, Mary Campbell                                                                                                                                                                                                                                                                                                                                                                                                                                                                                                                                                                                                                                                                                                                                                                                                                                                                                                                 |
| EPI_ISL_1017108, EPI_ISL_1017109, EPI_ISL_1017110, EPI_ISL_1017111                                                                                                                                                                                                                                               | Providence Saint Joseph Medical Center - Burbank                                                                                                                                                                                                                                                                                                                                                                                                                                              | Providence St. Joseph Health Molecular Genomics Laboratory                                                                                                             | Alexa K Dowdell, Brian D Piening, Fred L Robinson, Carlo B Bifulco, Mary Campbell                                                                                                                                                                                                                                                                                                                                                                                                                                                                                                                                                                                                                                                                                                                                                                                                                                                                                                                 |
| EPI_ISL_1017112, EPI_ISL_1017113, EPI_ISL_1017114, EPI_ISL_1017115                                                                                                                                                                                                                                               | Providence Oregon Regional Laboratories                                                                                                                                                                                                                                                                                                                                                                                                                                                       | Providence St. Joseph Health Molecular Genomics Laboratory                                                                                                             | Alexa K Dowdell, Brian D Piening, Fred L Robinson, Carlo B Bifulco, Mary Campbell                                                                                                                                                                                                                                                                                                                                                                                                                                                                                                                                                                                                                                                                                                                                                                                                                                                                                                                 |
| EPI_ISL_1017116, EPI_ISL_1017117                                                                                                                                                                                                                                                                                 | Providence Saint Joseph Medical Center - Burbank                                                                                                                                                                                                                                                                                                                                                                                                                                              | Providence St. Joseph Health Molecular Genomics Laboratory                                                                                                             | Alexa K Dowdell, Brian D Piening, Fred L Robinson, Carlo B Bifulco, Mary Campbell                                                                                                                                                                                                                                                                                                                                                                                                                                                                                                                                                                                                                                                                                                                                                                                                                                                                                                                 |
| EPI_ISL_1017118, EPI_ISL_1017119                                                                                                                                                                                                                                                                                 | Providence St. Joseph Health Orange - Chapman                                                                                                                                                                                                                                                                                                                                                                                                                                                 | Providence St. Joseph Health Molecular Genomics Laboratory                                                                                                             | Alexa K Dowdell, Brian D Piening, Fred L Robinson, Carlo B Bifulco, Mary Campbell                                                                                                                                                                                                                                                                                                                                                                                                                                                                                                                                                                                                                                                                                                                                                                                                                                                                                                                 |
| EPI_ISL_1017120, EPI_ISL_1017121, EPI_ISL_1017122, EPI_ISL_1017123, EPI_ISL_1017124, EPI_ISL_1017125                                                                                                                                                                                                             | Providence Oregon Regional Laboratories                                                                                                                                                                                                                                                                                                                                                                                                                                                       | Providence St. Joseph Health Molecular Genomics Laboratory                                                                                                             | Alexa K Dowdell, Brian D Piening, Fred L Robinson, Carlo B Bifulco, Mary Campbell                                                                                                                                                                                                                                                                                                                                                                                                                                                                                                                                                                                                                                                                                                                                                                                                                                                                                                                 |
| EPI_ISL_1017126, EPI_ISL_1017127, EPI_ISL_1017128, EPI_ISL_1017129, EPI_ISL_1017130, EPI_ISL_1017131, EPI_ISL_1017132                                                                                                                                                                                            | Providence Saint Joseph Medical Center - Burbank                                                                                                                                                                                                                                                                                                                                                                                                                                              | Providence St. Joseph Health Molecular Genomics Laboratory                                                                                                             | Alexa K Dowdell, Brian D Piening, Fred L Robinson, Carlo B Bifulco, Mary Campbell                                                                                                                                                                                                                                                                                                                                                                                                                                                                                                                                                                                                                                                                                                                                                                                                                                                                                                                 |
| EPI_ISL_1017133, EPI_ISL_1017134, EPI_ISL_1017135, EPI_ISL_1017136, EPI_ISL_1017137, EPI_ISL_1017138, EPI_ISL_1017139, EPI_ISL_1017140, EPI_ISL_1017141, EPI_ISL_1017142, EPI_ISL_1017143, EPI_ISL_1017144, EPI_ISL_1017145, EPI_ISL_1017146                                                                     |                                                                                                                                                                                                                                                                                                                                                                                                                                                                                               |                                                                                                                                                                        |                                                                                                                                                                                                                                                                                                                                                                                                                                                                                                                                                                                                                                                                                                                                                                                                                                                                                                                                                                                                   |
| see above                                                                                                                                                                                                                                                                                                        | Providence St. Joseph Health Orange - Chapman                                                                                                                                                                                                                                                                                                                                                                                                                                                 | Providence St. Joseph Health Molecular Genomics Laboratory                                                                                                             | Alexa K Dowdell, Brian D Piening, Fred L Robinson, Carlo B Bifulco, Mary Campbell                                                                                                                                                                                                                                                                                                                                                                                                                                                                                                                                                                                                                                                                                                                                                                                                                                                                                                                 |
| EPI_ISL_1017147, EPI_ISL_1017148, EPI_ISL_1017149, EPI_ISL_1017150, EPI_ISL_1017151, EPI_ISL_1017152, EPI_ISL_1017153, EPI_ISL_1017154, EPI_ISL_1017155, EPI_ISL_1017156, EPI_ISL_1017157, EPI_ISL_1017158, EPI_ISL_1017159, EPI_ISL_1017160                                                                     |                                                                                                                                                                                                                                                                                                                                                                                                                                                                                               |                                                                                                                                                                        |                                                                                                                                                                                                                                                                                                                                                                                                                                                                                                                                                                                                                                                                                                                                                                                                                                                                                                                                                                                                   |
| see above                                                                                                                                                                                                                                                                                                        | Providence Saint Joseph Medical Center - Burbank                                                                                                                                                                                                                                                                                                                                                                                                                                              | Providence St. Joseph Health Molecular Genomics Laboratory                                                                                                             | Alexa K Dowdell, Brian D Piening, Fred L Robinson, Carlo B Bifulco, Mary Campbell                                                                                                                                                                                                                                                                                                                                                                                                                                                                                                                                                                                                                                                                                                                                                                                                                                                                                                                 |
| EPI_ISL_1017161, EPI_ISL_1017162, EPI_ISL_1017163, EPI_ISL_1017164, EPI_ISL_1017165, EPI_ISL_1017166, EPI_ISL_1017167, EPI_ISL_1017168, EPI_ISL_1017169, EPI_ISL_1017170, EPI_ISL_1017171                                                                                                                        |                                                                                                                                                                                                                                                                                                                                                                                                                                                                                               |                                                                                                                                                                        |                                                                                                                                                                                                                                                                                                                                                                                                                                                                                                                                                                                                                                                                                                                                                                                                                                                                                                                                                                                                   |
| see above                                                                                                                                                                                                                                                                                                        | Providence Regional Medical Center Everett                                                                                                                                                                                                                                                                                                                                                                                                                                                    | Providence St. Joseph Health Molecular Genomics Laboratory                                                                                                             | Alexa K Dowdell, Brian D Piening, Fred L Robinson, Carlo B Bifulco, Mary Campbell                                                                                                                                                                                                                                                                                                                                                                                                                                                                                                                                                                                                                                                                                                                                                                                                                                                                                                                 |
| EPI_ISL_1017172                                                                                                                                                                                                                                                                                                  | Providence Oregon Regional Laboratories                                                                                                                                                                                                                                                                                                                                                                                                                                                       | Providence St. Joseph Health Molecular Genomics Laboratory                                                                                                             | Alexa K Dowdell, Brian D Piening, Fred L Robinson, Carlo B Bifulco, Mary Campbell                                                                                                                                                                                                                                                                                                                                                                                                                                                                                                                                                                                                                                                                                                                                                                                                                                                                                                                 |
| EPI_ISL_1017506, EPI_ISL_1017522, EPI_ISL_1017526, EPI_ISL_1017527, EPI_ISL_1017530, EPI_ISL_1017539, EPI_ISL_1017544, EPI_ISL_1017549, EPI_ISL_1017556, EPI_ISL_1017558, EPI_ISL_1017560                                                                                                                        |                                                                                                                                                                                                                                                                                                                                                                                                                                                                                               |                                                                                                                                                                        |                                                                                                                                                                                                                                                                                                                                                                                                                                                                                                                                                                                                                                                                                                                                                                                                                                                                                                                                                                                                   |
| see above                                                                                                                                                                                                                                                                                                        | Murphy Medical Associates                                                                                                                                                                                                                                                                                                                                                                                                                                                                     | Grubaugh Lab - Yale School of Public Health                                                                                                                            | Mary Petrone, Joseph Fauver, Caleb Neal, Steven Murphy, Chantal Vogels, Mallory Breban, Annie Watkins, Tara Alpert, Nathan Grubaugh                                                                                                                                                                                                                                                                                                                                                                                                                                                                                                                                                                                                                                                                                                                                                                                                                                                               |





|                                                                                                                                                                                                                                                                                                                                                                                                                                                                                                                                                                                                                                                                                                                                                                                                                                                                                                                                                                                                                                                                                              |                                                                                                    |                                                                                 |                                                                                                                                                                                                                                                                                                                                                                                                                                                           |  |
|----------------------------------------------------------------------------------------------------------------------------------------------------------------------------------------------------------------------------------------------------------------------------------------------------------------------------------------------------------------------------------------------------------------------------------------------------------------------------------------------------------------------------------------------------------------------------------------------------------------------------------------------------------------------------------------------------------------------------------------------------------------------------------------------------------------------------------------------------------------------------------------------------------------------------------------------------------------------------------------------------------------------------------------------------------------------------------------------|----------------------------------------------------------------------------------------------------|---------------------------------------------------------------------------------|-----------------------------------------------------------------------------------------------------------------------------------------------------------------------------------------------------------------------------------------------------------------------------------------------------------------------------------------------------------------------------------------------------------------------------------------------------------|--|
| EPI_ISL_1036658<br>EPI_ISL_1036665, EPI_ISL_1036666,<br>EPI_ISL_1036668, EPI_ISL_1036676,<br>EPI_ISL_1036680                                                                                                                                                                                                                                                                                                                                                                                                                                                                                                                                                                                                                                                                                                                                                                                                                                                                                                                                                                                 | Tyler Radniecki<br>Wyoming Public Health Laboratory                                                | Center for Genome Research and Biocomputing<br>Wyoming Public Health Laboratory | Ghosh, Arifa Akram, A. K. M. Shamsuzzaman, Md. Salim Khan<br>Oregon State University TRACE Project<br>Noah Hull, Taylor Fearing, Lynette Gumbleton, Channing Weber, Ashley Norberg, Bailey Bowcutt, and Wanda Manley                                                                                                                                                                                                                                      |  |
|                                                                                                                                                                                                                                                                                                                                                                                                                                                                                                                                                                                                                                                                                                                                                                                                                                                                                                                                                                                                                                                                                              |                                                                                                    |                                                                                 |                                                                                                                                                                                                                                                                                                                                                                                                                                                           |  |
|                                                                                                                                                                                                                                                                                                                                                                                                                                                                                                                                                                                                                                                                                                                                                                                                                                                                                                                                                                                                                                                                                              |                                                                                                    |                                                                                 |                                                                                                                                                                                                                                                                                                                                                                                                                                                           |  |
|                                                                                                                                                                                                                                                                                                                                                                                                                                                                                                                                                                                                                                                                                                                                                                                                                                                                                                                                                                                                                                                                                              |                                                                                                    |                                                                                 |                                                                                                                                                                                                                                                                                                                                                                                                                                                           |  |
| EPI_ISL_1036751                                                                                                                                                                                                                                                                                                                                                                                                                                                                                                                                                                                                                                                                                                                                                                                                                                                                                                                                                                                                                                                                              | National Institute of Laboratory Medicine and Referral Center                                      | Genomic Research Lab, BCSIR                                                     | Shahina Akter, Mohammad Samir Uzzaman, Eshrar Osman, Md. Ahashan Habib, Tanjina Akhtar Banu, Abu Sayeed Mohammad Mahmud, Md. Murshed Hasan Sarkar, Barna Goswami, Iffat Jahan, Md. Saddam Hossain, Tasnim Nafisa, Md. Maruf Ahmed Molla, Mahmuda Yeasmin, Asish Kumar Ghosh, Arifa Akram, A. K. M. Shamsuzzaman, Md. Salim Khan                                                                                                                           |  |
| EPI_ISL_1036752                                                                                                                                                                                                                                                                                                                                                                                                                                                                                                                                                                                                                                                                                                                                                                                                                                                                                                                                                                                                                                                                              | National Institute of Laboratory Medicine and Referral Center                                      | Genomic Research Lab, BCSIR, Dr. Quadrat-E-Khuda Road, Dhaka 1205, Bangladesh   | Tanjina Akhtar Banu, Mohammad Samir Uzzaman, Eshrar Osman, Md. Ahashan Habib, Shahina Akter, Abu Sayeed Mohammad Mahmud, Md. Murshed Hasan Sarkar, Barna Goswami, Iffat Jahan, Md. Saddam Hossain, Tasnim Nafisa, Md. Maruf Ahmed Molla, Mahmuda Yeasmin, Asish Kumar Ghosh, Arifa Akram, A. K. M. Shamsuzzaman, Md. Salim Khan,                                                                                                                          |  |
| EPI_ISL_1038792                                                                                                                                                                                                                                                                                                                                                                                                                                                                                                                                                                                                                                                                                                                                                                                                                                                                                                                                                                                                                                                                              | US Air Force School of Aerospace Medicine                                                          | US Air Force School of Aerospace Medicine                                       | Anthony Fries, Jennifer Meyer, William Gruner, William Buggele, Amanda Javorina, Sarah Purves, Clarise Starr, Elizabeth Macias                                                                                                                                                                                                                                                                                                                            |  |
| EPI_ISL_1039009, EPI_ISL_1039010,<br>EPI_ISL_1039011                                                                                                                                                                                                                                                                                                                                                                                                                                                                                                                                                                                                                                                                                                                                                                                                                                                                                                                                                                                                                                         | WHO National Influenza Centre Russian Federation                                                   | WHO National Influenza Centre Russian Federation                                | Andrey Komissarov, Artem Fadeev, Anna Ivanova, Kseniya Komissarova, Dmitry Bazhenov, Tamila Musaeva, Maria Timofeeva, Veronika Eder, Maria Pisareva, Daria Danilenko, Ksenia Safina, Elena Nabieva, Georgii Bazykin, Dmitry Lioznov                                                                                                                                                                                                                       |  |
| EPI_ISL_1039012, EPI_ISL_1039014, EPI_ISL_1039015, EPI_ISL_1039016, EPI_ISL_1039020, EPI_ISL_1039026,<br>see above                                                                                                                                                                                                                                                                                                                                                                                                                                                                                                                                                                                                                                                                                                                                                                                                                                                                                                                                                                           | Kamchatka Regional Children's Infectious Diseases Hospital                                         | WHO National Influenza Centre Russian Federation                                | Andrey Komissarov, Artem Fadeev, Anna Ivanova, Kseniya Komissarova, Dmitry Bazhenov, Tamila Musaeva, Maria Timofeeva, Veronika Eder, Maria Pisareva, Daria Danilenko, Ksenia Safina, Elena Nabieva, Georgii Bazykin, Dmitry Lioznov                                                                                                                                                                                                                       |  |
| EPI_ISL_1039068                                                                                                                                                                                                                                                                                                                                                                                                                                                                                                                                                                                                                                                                                                                                                                                                                                                                                                                                                                                                                                                                              | Center of Hygiene and Epidemiology in Belgorod Region                                              | WHO National Influenza Centre Russian Federation                                | Andrey Komissarov, Artem Fadeev, Lyudmila Berdinskikh, Anna Ivanova, Kseniya Komissarova, Dmitry Bazhenov, Tamila Musaeva, Maria Timofeeva, Veronika Eder, Maria Pisareva, Daria Danilenko, Ksenia Safina, Elena Nabieva, Georgii Bazykin, Dmitry Lioznov                                                                                                                                                                                                 |  |
| EPI_ISL_1039126, EPI_ISL_1039128,<br>EPI_ISL_1039129, EPI_ISL_1039130,<br>EPI_ISL_1039131, EPI_ISL_1039133,<br>EPI_ISL_1039136                                                                                                                                                                                                                                                                                                                                                                                                                                                                                                                                                                                                                                                                                                                                                                                                                                                                                                                                                               | HELIX LLC                                                                                          | WHO National Influenza Centre Russian Federation                                | Andrey Komissarov, Artem Fadeev, Anna Ivanova, Kseniya Komissarova, Dmitry Bazhenov, Tamila Musaeva, Maria Timofeeva, Veronika Eder, Maria Pisareva, Daria Danilenko, Ksenia Safina, Elena Nabieva, Georgii Bazykin, Dmitry Lioznov                                                                                                                                                                                                                       |  |
| EPI_ISL_1039152                                                                                                                                                                                                                                                                                                                                                                                                                                                                                                                                                                                                                                                                                                                                                                                                                                                                                                                                                                                                                                                                              | Pathogenic Microorganisms Variability Laboratory                                                   | WHO National Influenza Centre Russian Federation                                | Andrey Komissarov, Artem Fadeev, Anna Ivanova, Kseniya Komissarova, Dmitry Bazhenov, Daria Danilenko, Ksenia Safina, Elena Nabieva, Georgii Bazykin, Nadezhda Kuznetsova, Elena Shidlovskaya, Sergey Alkhovsky, Tatyana Vishnevskaya, Elizaveta Divisenko, Alexey Shchetinin, Maria Nikiforova, Andrey Pochtovyy, Evgeny Usachev, Elena Vokalova, Maxim Rubalsky, Oleg Rubalsky, Artem Tkachuk, Vladimir Gushchin, Alexander Gintsburg, Dmitry Lioznov    |  |
| EPI_ISL_1039724                                                                                                                                                                                                                                                                                                                                                                                                                                                                                                                                                                                                                                                                                                                                                                                                                                                                                                                                                                                                                                                                              | Alaska State Virology Laboratory                                                                   | Alaska State Virology Laboratory                                                | Stephanie DeRonde, Lisa Smith, Ph.D., Jack Chen, Ph.D.                                                                                                                                                                                                                                                                                                                                                                                                    |  |
| EPI_ISL_1040484                                                                                                                                                                                                                                                                                                                                                                                                                                                                                                                                                                                                                                                                                                                                                                                                                                                                                                                                                                                                                                                                              | National Institute of Laboratory Medicine and Referral Center                                      | Genomic Research Lab, BCSIR                                                     | Shahina Akter, Mohammad Samir Uzzaman, Eshrar Osman, Md. Ahashan Habib, Tanjina Akhtar Banu, Abu Sayeed Mohammad Mahmud, Md. Murshed Hasan Sarkar, Barna Goswami, Iffat Jahan, Md. Saddam Hossain, Tasnim Nafisa, Md. Maruf Ahmed Molla, Mahmuda Yeasmin, Asish Kumar Ghosh, Arifa Akram, A. K. M. Shamsuzzaman, Md. Salim Khan                                                                                                                           |  |
| EPI_ISL_1040485                                                                                                                                                                                                                                                                                                                                                                                                                                                                                                                                                                                                                                                                                                                                                                                                                                                                                                                                                                                                                                                                              | National Institute of Laboratory Medicine and Referral Center                                      | Genomic Research Lab, BCSIR                                                     | Md. Saddam Hossain, Mohammad Samir Uzzaman, Eshrar Osman, Md. Ahashan Habib, Shahina Akter, Tanjina Akhtar Banu, Abu Sayeed Mohammad Mahmud, Md. Murshed Hasan Sarkar, Barna Goswami, Iffat Jahan, Tasnim Nafisa, Md. Maruf Ahmed Molla, Mahmuda Yeasmin, Asish Kumar Ghosh, Arifa Akram, A. K. M. Shamsuzzaman, Md. Salim Khan                                                                                                                           |  |
| EPI_ISL_1040706, EPI_ISL_1040747,<br>EPI_ISL_1040750, EPI_ISL_1040751,<br>EPI_ISL_1040753                                                                                                                                                                                                                                                                                                                                                                                                                                                                                                                                                                                                                                                                                                                                                                                                                                                                                                                                                                                                    | Groote Schuur Hospital wc GSH                                                                      | NHLS/UCT                                                                        | Arash Iranzadeh, Deelan Doolabh, Lynn Tyers, Bruna Galvao, Innocent Mudau, Marvin Hsiao, Kruger Marais, Diana Hardie, Stephen Korsman, Carolyn Williamson                                                                                                                                                                                                                                                                                                 |  |
| EPI_ISL_1040762                                                                                                                                                                                                                                                                                                                                                                                                                                                                                                                                                                                                                                                                                                                                                                                                                                                                                                                                                                                                                                                                              | Bredasdorp clinic                                                                                  | NHLS/UCT                                                                        | Arash Iranzadeh, Deelan Doolabh, Lynn Tyers, Bruna Galvao, Innocent Mudau, Marvin Hsiao, Kruger Marais, Diana Hardie, Stephen Korsman, Carolyn Williamson                                                                                                                                                                                                                                                                                                 |  |
| EPI_ISL_1040763                                                                                                                                                                                                                                                                                                                                                                                                                                                                                                                                                                                                                                                                                                                                                                                                                                                                                                                                                                                                                                                                              | Groote Schuur Hospital wc GSH                                                                      | NHLS/UCT                                                                        | Arash Iranzadeh, Deelan Doolabh, Lynn Tyers, Bruna Galvao, Innocent Mudau, Marvin Hsiao, Kruger Marais, Diana Hardie, Stephen Korsman, Carolyn Williamson                                                                                                                                                                                                                                                                                                 |  |
| EPI_ISL_1047914, EPI_ISL_1047918,<br>EPI_ISL_1047921, EPI_ISL_1047929,<br>EPI_ISL_1047941, EPI_ISL_1047942,<br>EPI_ISL_1047956                                                                                                                                                                                                                                                                                                                                                                                                                                                                                                                                                                                                                                                                                                                                                                                                                                                                                                                                                               | University Hospitals Of Leicester NHS Trust and DeepSeq Nottingham                                 | COVID-19 Genomics UK (COG-UK) Consortium                                        | Christopher Holmes, Paul Bird, Thomas Helmer, Karlie Fallon, Julian Tang, Jonathan Ball, Patrick McClure, Joseph Chappell, Nadine Holmes, Matthew Carlisle, Christopher Moore, Fei Sang, Johnny Debebe, Victoria Wright, Matthew Loose                                                                                                                                                                                                                    |  |
| EPI_ISL_1048652, EPI_ISL_1048653, EPI_ISL_1048654, EPI_ISL_1048655, EPI_ISL_1048656, EPI_ISL_1048657, EPI_ISL_1048658, EPI_ISL_1048660, EPI_ISL_1048661, EPI_ISL_1048662, EPI_ISL_1048663, EPI_ISL_1048664                                                                                                                                                                                                                                                                                                                                                                                                                                                                                                                                                                                                                                                                                                                                                                                                                                                                                   | see above                                                                                          | Maine HETL                                                                      | Matluk,N., Dewey,H., Isoue,F., Barter,M., Lynch,R., Munger,H. and Tewhey,R.                                                                                                                                                                                                                                                                                                                                                                               |  |
| EPI_ISL_1048807, EPI_ISL_1048810,<br>EPI_ISL_1048811, EPI_ISL_1048813                                                                                                                                                                                                                                                                                                                                                                                                                                                                                                                                                                                                                                                                                                                                                                                                                                                                                                                                                                                                                        | Laboratory of Clinical Microbiology, Virology and Bioemergencies - Fatebenefratelli Sacco Hospital | Virology Laboratory, Scientific Department, Army Medical Center                 | Valeria Micheli, Alessandro Mancon, Alberto Rizzo, Maria Rita Gismondo, Silvia Fillo, Anella Monte, Anna Anselmo, Vanessa Vera Fain, Giovanni Faggioni, Riccardo De Sanctis, Florigio Lista                                                                                                                                                                                                                                                               |  |
| EPI_ISL_1049281, EPI_ISL_1049296, EPI_ISL_1049298, EPI_ISL_1049299, EPI_ISL_1049300, EPI_ISL_1049301, EPI_ISL_1049308, EPI_ISL_1049309, EPI_ISL_1049311, EPI_ISL_1049313, EPI_ISL_1049314, EPI_ISL_1049316, EPI_ISL_1049318, EPI_ISL_1049320, EPI_ISL_1049324, EPI_ISL_1049327, EPI_ISL_1049329, EPI_ISL_1049330, EPI_ISL_1049331, EPI_ISL_1049333, EPI_ISL_1049335, EPI_ISL_1049336                                                                                                                                                                                                                                                                                                                                                                                                                                                                                                                                                                                                                                                                                                         | see above                                                                                          | Innovative Genomics Institute, UC Berkeley                                      | Stacia Wyman, Alison Ciling, Netravathi Krishnappa, Haridha Shivram, Phil Frankino, Liana Lareau                                                                                                                                                                                                                                                                                                                                                          |  |
| EPI_ISL_1049338, EPI_ISL_1049339                                                                                                                                                                                                                                                                                                                                                                                                                                                                                                                                                                                                                                                                                                                                                                                                                                                                                                                                                                                                                                                             | Wadsworth Center, New York State Department of Health                                              | Wadsworth Center, New York State Department of Health                           | Kirsten St. George, Daryl M. Lamson, Alexis Russel, Matthew Shuett, Melissa A Leisner, Jonathan Pitnick, Navjot Singh, John Kelly, Erasmus Schneider, Erica Lasek-Nesselquist                                                                                                                                                                                                                                                                             |  |
| EPI_ISL_1049508, EPI_ISL_1049509,<br>EPI_ISL_1049510                                                                                                                                                                                                                                                                                                                                                                                                                                                                                                                                                                                                                                                                                                                                                                                                                                                                                                                                                                                                                                         | Alaska State Virology Laboratory                                                                   | Alaska State Virology Laboratory                                                | Stephanie DeRonde, Lisa Smith, Ph.D., Jack Chen, Ph.D.                                                                                                                                                                                                                                                                                                                                                                                                    |  |
| EPI_ISL_1051505, EPI_ISL_1051517                                                                                                                                                                                                                                                                                                                                                                                                                                                                                                                                                                                                                                                                                                                                                                                                                                                                                                                                                                                                                                                             | Quadram Institute Bioscience                                                                       | COVID-19 Genomics UK (COG-UK) Consortium                                        | Dave J. Baker, Gemma L. Kay, Alp Aydin, Thanh Le-Viet, Steven Rudder, Ana P. Tedim, Anastasia Kolyva, Maria Diaz, Leonardo de Oliveira Martins, Nabil-Fareed Alikhan, Lizzie Meadows, Rachael Stanley, Ngozi Elumogo, Muhammed Yasir, Nicholas M. Thomson, Alexander J Trotter, Rachel Gilroy, Samuel Bloomfield, Claire Stuart, Andrew Bell, Reenesh Prakash, Samir Dervisevic, Alison E. Mather, John Wain, Mark Webber, Andrew J. Page, Justin O'Grady |  |
| EPI_ISL_1055124, EPI_ISL_1055163,<br>EPI_ISL_1055167                                                                                                                                                                                                                                                                                                                                                                                                                                                                                                                                                                                                                                                                                                                                                                                                                                                                                                                                                                                                                                         | National Virus Reference Laboratory                                                                | National Virus Reference Laboratory                                             | Guerrino Macori, Gabriel Gonzalez, Michael Carr, Zoe Yandle, Jonathan Dean, Seamus Fanning, Cillian F De Gascun                                                                                                                                                                                                                                                                                                                                           |  |
| EPI_ISL_1055428, EPI_ISL_1055429, EPI_ISL_1055430, EPI_ISL_1055432, EPI_ISL_1055433, EPI_ISL_1055434, EPI_ISL_1055435, EPI_ISL_1055436, EPI_ISL_1055437, EPI_ISL_1055440, EPI_ISL_1055442, EPI_ISL_1055443, EPI_ISL_1055445, EPI_ISL_1055446, EPI_ISL_1055447, EPI_ISL_1055448                                                                                                                                                                                                                                                                                                                                                                                                                                                                                                                                                                                                                                                                                                                                                                                                               | see above                                                                                          | Dr. Leonard A. Miller Centre for Health Services                                | National Microbiology Laboratory (NML)                                                                                                                                                                                                                                                                                                                                                                                                                    |  |
| EPI_ISL_1055475, EPI_ISL_1055476, EPI_ISL_1055477, EPI_ISL_1055478, EPI_ISL_1055480, EPI_ISL_1055481, EPI_ISL_1055482, EPI_ISL_1055483, EPI_ISL_1055484, EPI_ISL_1055485, EPI_ISL_1055486, EPI_ISL_1055487, EPI_ISL_1055488, EPI_ISL_1055489, EPI_ISL_1055490, EPI_ISL_1055491, EPI_ISL_1055492, EPI_ISL_1055493, EPI_ISL_1055494, EPI_ISL_1055495, EPI_ISL_1055496, EPI_ISL_1055497, EPI_ISL_1055498, EPI_ISL_1055499, EPI_ISL_1055500, EPI_ISL_1055501, EPI_ISL_1055502, EPI_ISL_1055503, EPI_ISL_1055505, EPI_ISL_1055506, EPI_ISL_1055507, EPI_ISL_1055508, EPI_ISL_1055509, EPI_ISL_1055510, EPI_ISL_1055511, EPI_ISL_1055512, EPI_ISL_1055513, EPI_ISL_1055514, EPI_ISL_1055515, EPI_ISL_1055516, EPI_ISL_1055517, EPI_ISL_1055519, EPI_ISL_1055520, EPI_ISL_1055521, EPI_ISL_1055522, EPI_ISL_1055525, EPI_ISL_1055526, EPI_ISL_1055527, EPI_ISL_1055528, EPI_ISL_1055530, EPI_ISL_1055533, EPI_ISL_1055534, EPI_ISL_1055535, EPI_ISL_1055536, EPI_ISL_1055540, EPI_ISL_1055545, EPI_ISL_1055694, EPI_ISL_1055697, EPI_ISL_1055719, EPI_ISL_1055720, EPI_ISL_1055721, EPI_ISL_1055722 | see above                                                                                          | QEII Health Sciences Centre                                                     | National Microbiology Laboratory (NML)                                                                                                                                                                                                                                                                                                                                                                                                                    |  |
| see above                                                                                                                                                                                                                                                                                                                                                                                                                                                                                                                                                                                                                                                                                                                                                                                                                                                                                                                                                                                                                                                                                    |                                                                                                    |                                                                                 | Anna Majer, Shari Tyson, Grace Seo, Philip Mabon, Elsie Grudeski, Rhiannon Huzarewich, Russell Mandes, Anneliese Landgraff, Jennifer Tanner, Natalie Knox, Morag Graham, Gary Van Domselaar, Robert Needle, Yang Yu, Adel Malek, Laura Gilbert, George Zahariadis, Nathalie Bastien, Yan Li, Timothy Booth, Darian Hole, Madison Chapel, Kirsten Biggar, Kerri Smith, CanCOGen's metadata curation team, Public Health Agency of Canada CanCOGen team     |  |





|                                                                                                                                                                                                                                                                                                                                                                                                                                                                                                                                                                                                                                                                                                                                                                                                                                                                                                                                                                                                                                                                                                                                                                                                                                                                                                                                                                                                                                                                                                                                                                                                                                                                                                                                                                                                                                                                                                                                                                                                                                                                                                                                                                                                                                                                                                                                                                                                                                                                                                                                                                                                                                                                                                                                                                                                                                                                                                                                                                                                                                                                                                                                                                                                     |                                                                                                                             |                                                                                                                                            |                                                                                                                                                                                                                                                                                                                                                                                                                                                                                                                                                                                                 |
|-----------------------------------------------------------------------------------------------------------------------------------------------------------------------------------------------------------------------------------------------------------------------------------------------------------------------------------------------------------------------------------------------------------------------------------------------------------------------------------------------------------------------------------------------------------------------------------------------------------------------------------------------------------------------------------------------------------------------------------------------------------------------------------------------------------------------------------------------------------------------------------------------------------------------------------------------------------------------------------------------------------------------------------------------------------------------------------------------------------------------------------------------------------------------------------------------------------------------------------------------------------------------------------------------------------------------------------------------------------------------------------------------------------------------------------------------------------------------------------------------------------------------------------------------------------------------------------------------------------------------------------------------------------------------------------------------------------------------------------------------------------------------------------------------------------------------------------------------------------------------------------------------------------------------------------------------------------------------------------------------------------------------------------------------------------------------------------------------------------------------------------------------------------------------------------------------------------------------------------------------------------------------------------------------------------------------------------------------------------------------------------------------------------------------------------------------------------------------------------------------------------------------------------------------------------------------------------------------------------------------------------------------------------------------------------------------------------------------------------------------------------------------------------------------------------------------------------------------------------------------------------------------------------------------------------------------------------------------------------------------------------------------------------------------------------------------------------------------------------------------------------------------------------------------------------------------------|-----------------------------------------------------------------------------------------------------------------------------|--------------------------------------------------------------------------------------------------------------------------------------------|-------------------------------------------------------------------------------------------------------------------------------------------------------------------------------------------------------------------------------------------------------------------------------------------------------------------------------------------------------------------------------------------------------------------------------------------------------------------------------------------------------------------------------------------------------------------------------------------------|
| see above                                                                                                                                                                                                                                                                                                                                                                                                                                                                                                                                                                                                                                                                                                                                                                                                                                                                                                                                                                                                                                                                                                                                                                                                                                                                                                                                                                                                                                                                                                                                                                                                                                                                                                                                                                                                                                                                                                                                                                                                                                                                                                                                                                                                                                                                                                                                                                                                                                                                                                                                                                                                                                                                                                                                                                                                                                                                                                                                                                                                                                                                                                                                                                                           | Clinical Molecular Microbiology Laboratory, UNC Hospital                                                                    | Dirk Dittmer                                                                                                                               | Justin T. Landis , Razia Moorad , Brent A. Eason, Melissa B. Miller, Linda Pluta, Dirk Dittmer, Angelica Juarez, Cecilia Thompson, Shawn Hawken, Cameroon Grant, Evelyn Hoffman, Patricio Cano, Jason Wong, Carolina Caro-Vegas, Ryan McNamara, Blossom Damania.                                                                                                                                                                                                                                                                                                                                |
| EPI_ISL_1068108, EPI_ISL_1068109, EPI_ISL_1068113, EPI_ISL_1068115, EPI_ISL_1068142, EPI_ISL_1068143, EPI_ISL_1068144, EPI_ISL_1068145, EPI_ISL_1068146, EPI_ISL_1068147, EPI_ISL_1068152, EPI_ISL_1068153, EPI_ISL_1068155, EPI_ISL_1068161, EPI_ISL_1068196, EPI_ISL_1068223, EPI_ISL_1068255, EPI_ISL_1068257                                                                                                                                                                                                                                                                                                                                                                                                                                                                                                                                                                                                                                                                                                                                                                                                                                                                                                                                                                                                                                                                                                                                                                                                                                                                                                                                                                                                                                                                                                                                                                                                                                                                                                                                                                                                                                                                                                                                                                                                                                                                                                                                                                                                                                                                                                                                                                                                                                                                                                                                                                                                                                                                                                                                                                                                                                                                                    |                                                                                                                             |                                                                                                                                            |                                                                                                                                                                                                                                                                                                                                                                                                                                                                                                                                                                                                 |
| see above                                                                                                                                                                                                                                                                                                                                                                                                                                                                                                                                                                                                                                                                                                                                                                                                                                                                                                                                                                                                                                                                                                                                                                                                                                                                                                                                                                                                                                                                                                                                                                                                                                                                                                                                                                                                                                                                                                                                                                                                                                                                                                                                                                                                                                                                                                                                                                                                                                                                                                                                                                                                                                                                                                                                                                                                                                                                                                                                                                                                                                                                                                                                                                                           | Laboratorio de Ecologia de Doencas Transmissíveis na Amazonia, Instituto Leonidas e Maria Deane - Fiocruz Amazonia          | Laboratorio de Ecologia de Doencas Transmissíveis na Amazonia, Instituto Leonidas e Maria Deane - Fiocruz Amazonia                         | Valdinete Nascimento, Victor Souza, André Corado, Fernanda Nascimento, George Silva, Ágatha Costa, Debora Duarte, Karina Pessoa, Matilde Mejia, Luciana Gonçalves, Maria Júlia Brandão, Michele Jesus, Felipe Naveca on behalf of the Fiocruz COVID-19 Genomic Surveillance Network                                                                                                                                                                                                                                                                                                             |
| EPI_ISL_1072965                                                                                                                                                                                                                                                                                                                                                                                                                                                                                                                                                                                                                                                                                                                                                                                                                                                                                                                                                                                                                                                                                                                                                                                                                                                                                                                                                                                                                                                                                                                                                                                                                                                                                                                                                                                                                                                                                                                                                                                                                                                                                                                                                                                                                                                                                                                                                                                                                                                                                                                                                                                                                                                                                                                                                                                                                                                                                                                                                                                                                                                                                                                                                                                     | Department of Microbiology, Faculty of Medicine, Universitas Sumatera Utara                                                 | Institute of Tropical Disease, Universitas Airlangga; Faculty of Medicine, Universitas Sumatera Utara                                      | Kazufumi Shimizu, Krisnoadi Rahardjo, Aldise M Nastri, Jezzy R Dewantari, Rima R Prasetya, Inke N D Lubis, R Lia Kusumawati, Muhammad Ichwan, Franciscus Ginting, Meliani, Ramadhan Bestari, Mirzan Hasibuan, Irbah R Nainggolan, R Andika D Cahyadi, Yasuko Mori, Soetjipto, Maria I Lusida                                                                                                                                                                                                                                                                                                    |
| EPI_ISL_1072986                                                                                                                                                                                                                                                                                                                                                                                                                                                                                                                                                                                                                                                                                                                                                                                                                                                                                                                                                                                                                                                                                                                                                                                                                                                                                                                                                                                                                                                                                                                                                                                                                                                                                                                                                                                                                                                                                                                                                                                                                                                                                                                                                                                                                                                                                                                                                                                                                                                                                                                                                                                                                                                                                                                                                                                                                                                                                                                                                                                                                                                                                                                                                                                     | Department of Microbiology, Faculty of Medicine, Universitas Sumatera Utara                                                 | Institute of Tropical Disease, Universitas Airlangga; Faculty of Medicine, Universitas Sumatera Utara                                      | Krisnoadi Rahardjo, Aldise M Nastri, Jezzy R Dewantari, Rima R Prasetya, Inke N D Lubis, R Lia Kusumawati, Muhammad Ichwan, Franciscus Ginting, Meliani, Ramadhan Bestari, Mirzan Hasibuan, Irbah R Nainggolan, R Andika D Cahyadi, Yasuko Mori, Soetjipto, Kazufumi Shimizu, Maria I Lusida                                                                                                                                                                                                                                                                                                    |
| EPI_ISL_1072988                                                                                                                                                                                                                                                                                                                                                                                                                                                                                                                                                                                                                                                                                                                                                                                                                                                                                                                                                                                                                                                                                                                                                                                                                                                                                                                                                                                                                                                                                                                                                                                                                                                                                                                                                                                                                                                                                                                                                                                                                                                                                                                                                                                                                                                                                                                                                                                                                                                                                                                                                                                                                                                                                                                                                                                                                                                                                                                                                                                                                                                                                                                                                                                     | National Institute of Laboratory Medicine and Referral Center                                                               | Genomic Research Lab, BCSIR                                                                                                                | Ifat Jahan, Mohammad Samir Uzzaman, Eshrar Osman, Md. Ahashan Habib, Shahina Akter, Tanjina Akhtar Banu, Abu Sayeed Mohammad Mahmud, Md. Murshed Hasan Sarkar, Barna Goswami, Md. Saddam Hossain, Tasnim Nafisa, Md. Maruf Ahmed Molla, Mahmuda Yeasmin, Asish Kumar Ghosh, Arifa Akram, A. K. M.Shamsuzzaman, Md. Salim Khan                                                                                                                                                                                                                                                                   |
| EPI_ISL_1074398, EPI_ISL_1075063, EPI_ISL_1075459, EPI_ISL_1075460, EPI_ISL_1075463, EPI_ISL_1075464, EPI_ISL_1075471, EPI_ISL_1075474, EPI_ISL_1075480, EPI_ISL_1075481, EPI_ISL_1075482, EPI_ISL_1075484, EPI_ISL_1075489, EPI_ISL_1075492, EPI_ISL_1075493, EPI_ISL_1075505, EPI_ISL_1075506, EPI_ISL_1075511, EPI_ISL_1075517, EPI_ISL_1075525, EPI_ISL_1075526, EPI_ISL_1075533, EPI_ISL_1075536, EPI_ISL_1075543, EPI_ISL_1075548, EPI_ISL_1075550, EPI_ISL_1075551, EPI_ISL_1075552, EPI_ISL_1075553, EPI_ISL_1075557, EPI_ISL_1075561, EPI_ISL_1075564, EPI_ISL_1075565, EPI_ISL_1075566, EPI_ISL_1075590, EPI_ISL_1075591, EPI_ISL_1075592, EPI_ISL_1075593, EPI_ISL_1075595, EPI_ISL_1075602, EPI_ISL_1075604, EPI_ISL_1075607, EPI_ISL_1075610, EPI_ISL_1075611, EPI_ISL_1075612, EPI_ISL_1075614, EPI_ISL_1075618, EPI_ISL_1075627, EPI_ISL_1075628, EPI_ISL_1075629, EPI_ISL_1075632, EPI_ISL_1075633, EPI_ISL_1075637, EPI_ISL_1075639, EPI_ISL_1075652, EPI_ISL_1075653                                                                                                                                                                                                                                                                                                                                                                                                                                                                                                                                                                                                                                                                                                                                                                                                                                                                                                                                                                                                                                                                                                                                                                                                                                                                                                                                                                                                                                                                                                                                                                                                                                                                                                                                                                                                                                                                                                                                                                                                                                                                                                                                                                                                              |                                                                                                                             |                                                                                                                                            |                                                                                                                                                                                                                                                                                                                                                                                                                                                                                                                                                                                                 |
| see above                                                                                                                                                                                                                                                                                                                                                                                                                                                                                                                                                                                                                                                                                                                                                                                                                                                                                                                                                                                                                                                                                                                                                                                                                                                                                                                                                                                                                                                                                                                                                                                                                                                                                                                                                                                                                                                                                                                                                                                                                                                                                                                                                                                                                                                                                                                                                                                                                                                                                                                                                                                                                                                                                                                                                                                                                                                                                                                                                                                                                                                                                                                                                                                           | Houston Methodist Hospital                                                                                                  | Houston Methodist Hospital                                                                                                                 | S. Wesley Long, Randall J. Olsen, Paul A. Christensen, Sishir Subedi, Robert Olson, James J. Davis, Matthew Ojeda Saavedra, Prasanti Yerramilli, Layne Pruitt, Kristina Reppond, Madison N. Shyer, Jessica Cambric, Ilya J. Finkelstein, Jimmy Gollihar, and James M. Musser                                                                                                                                                                                                                                                                                                                    |
| EPI_ISL_1075657                                                                                                                                                                                                                                                                                                                                                                                                                                                                                                                                                                                                                                                                                                                                                                                                                                                                                                                                                                                                                                                                                                                                                                                                                                                                                                                                                                                                                                                                                                                                                                                                                                                                                                                                                                                                                                                                                                                                                                                                                                                                                                                                                                                                                                                                                                                                                                                                                                                                                                                                                                                                                                                                                                                                                                                                                                                                                                                                                                                                                                                                                                                                                                                     | Instituto Nacional de Medicina Genomica                                                                                     | Instituto Nacional de Medicina Genomica                                                                                                    | Hidalgo-Miranda A, Mendoza-Vargas A, Reyes-Grajeda JP, Cedro-Tanda A, Alcaraz N, Gonzalez-Barrera D, Rangel-DeLeon D, Ramirez-Vega O, Sifuentes-Rojas C, Cisneros-Villanueva M, Herrera-Montalvo LA.                                                                                                                                                                                                                                                                                                                                                                                            |
| EPI_ISL_1075658, EPI_ISL_1075659, EPI_ISL_1075660, EPI_ISL_1075661, EPI_ISL_1075662, EPI_ISL_1075663, EPI_ISL_1075667, EPI_ISL_1075668, EPI_ISL_1075672, EPI_ISL_1075675, EPI_ISL_1075676, EPI_ISL_1075678, EPI_ISL_1075679, EPI_ISL_1075681, EPI_ISL_1075683, EPI_ISL_1075684, EPI_ISL_1075685, EPI_ISL_1075687, EPI_ISL_1075692, EPI_ISL_1075701, EPI_ISL_1075706, EPI_ISL_1075707, EPI_ISL_1075708, EPI_ISL_1075709, EPI_ISL_1075710, EPI_ISL_1075713, EPI_ISL_1075719, EPI_ISL_1075721, EPI_ISL_1075723, EPI_ISL_1075727, EPI_ISL_1075730, EPI_ISL_1075731, EPI_ISL_1075745, EPI_ISL_1075746, EPI_ISL_1075750, EPI_ISL_1075751, EPI_ISL_1075753, EPI_ISL_1075756, EPI_ISL_1075758, EPI_ISL_1075761, EPI_ISL_1075765, EPI_ISL_1075766, EPI_ISL_1075767, EPI_ISL_1075768, EPI_ISL_1075769, EPI_ISL_1075773, EPI_ISL_1075774, EPI_ISL_1075776, EPI_ISL_1075778, EPI_ISL_1075783, EPI_ISL_1075787, EPI_ISL_1075788, EPI_ISL_1075790, EPI_ISL_1075793, EPI_ISL_1075794, EPI_ISL_1075795, EPI_ISL_1075804, EPI_ISL_1075805, EPI_ISL_1075811, EPI_ISL_1075812, EPI_ISL_1075813, EPI_ISL_1075814, EPI_ISL_1075816, EPI_ISL_1075825, EPI_ISL_1075826, EPI_ISL_1075830, EPI_ISL_1075834, EPI_ISL_1075836, EPI_ISL_1075837, EPI_ISL_1075839, EPI_ISL_1075840, EPI_ISL_1075841, EPI_ISL_1075844, EPI_ISL_1075805, EPI_ISL_1077080, EPI_ISL_1077084, EPI_ISL_1077091, EPI_ISL_1077092, EPI_ISL_1077093, EPI_ISL_1077095, EPI_ISL_1077101, EPI_ISL_1077105, EPI_ISL_1077109, EPI_ISL_1077114, EPI_ISL_1077118, EPI_ISL_1077124, EPI_ISL_1077135, EPI_ISL_1077137, EPI_ISL_1077142, EPI_ISL_1077143, EPI_ISL_1077144, EPI_ISL_1077146, EPI_ISL_1077147, EPI_ISL_1077149, EPI_ISL_1077150, EPI_ISL_1077153, EPI_ISL_1077156, EPI_ISL_1077165, EPI_ISL_1077166, EPI_ISL_1077170, EPI_ISL_1077175, EPI_ISL_1077177, EPI_ISL_1077178, EPI_ISL_1077179, EPI_ISL_1077180, EPI_ISL_1077184, EPI_ISL_1077186, EPI_ISL_1077189, EPI_ISL_1077190, EPI_ISL_1077192, EPI_ISL_1077195, EPI_ISL_1077196, EPI_ISL_1077199, EPI_ISL_1077201, EPI_ISL_1077202, EPI_ISL_1077203, EPI_ISL_1077205, EPI_ISL_1077207, EPI_ISL_1077209, EPI_ISL_1077210, EPI_ISL_1077211, EPI_ISL_1077216, EPI_ISL_1077217, EPI_ISL_1077221, EPI_ISL_1077223, EPI_ISL_1077224, EPI_ISL_1077225, EPI_ISL_1077230, EPI_ISL_1077231, EPI_ISL_1077235, EPI_ISL_1077238, EPI_ISL_1077240, EPI_ISL_1077244, EPI_ISL_1077246, EPI_ISL_1077250, EPI_ISL_1077254, EPI_ISL_1077255, EPI_ISL_1077256, EPI_ISL_1077257, EPI_ISL_1077258, EPI_ISL_1077259, EPI_ISL_1077262, EPI_ISL_1077263, EPI_ISL_1077264, EPI_ISL_1077265, EPI_ISL_1077267, EPI_ISL_1077285, EPI_ISL_1077269, EPI_ISL_1077270, EPI_ISL_1077275, EPI_ISL_1077290, EPI_ISL_1077297, EPI_ISL_1077306, EPI_ISL_1077311, EPI_ISL_1077315, EPI_ISL_1077319, EPI_ISL_1077323, EPI_ISL_1077333, EPI_ISL_1077339, EPI_ISL_1077340, EPI_ISL_1077342, EPI_ISL_1077343, EPI_ISL_1077344, EPI_ISL_1077358, EPI_ISL_1077360, EPI_ISL_1077369, EPI_ISL_1077376, EPI_ISL_1077378, EPI_ISL_1077381, EPI_ISL_1077385, EPI_ISL_1077396, EPI_ISL_1077401, EPI_ISL_1077403, EPI_ISL_1077419, EPI_ISL_1077421, EPI_ISL_1077428, EPI_ISL_1077440, EPI_ISL_1077442, EPI_ISL_1077447, EPI_ISL_1077455, EPI_ISL_1077463 |                                                                                                                             |                                                                                                                                            |                                                                                                                                                                                                                                                                                                                                                                                                                                                                                                                                                                                                 |
| see above                                                                                                                                                                                                                                                                                                                                                                                                                                                                                                                                                                                                                                                                                                                                                                                                                                                                                                                                                                                                                                                                                                                                                                                                                                                                                                                                                                                                                                                                                                                                                                                                                                                                                                                                                                                                                                                                                                                                                                                                                                                                                                                                                                                                                                                                                                                                                                                                                                                                                                                                                                                                                                                                                                                                                                                                                                                                                                                                                                                                                                                                                                                                                                                           | Houston Methodist Hospital                                                                                                  | Houston Methodist Hospital                                                                                                                 | S. Wesley Long, Randall J. Olsen, Paul A. Christensen, Sishir Subedi, Robert Olson, James J. Davis, Matthew Ojeda Saavedra, Prasanti Yerramilli, Layne Pruitt, Kristina Reppond, Madison N. Shyer, Jessica Cambric, Ilya J. Finkelstein, Jimmy Gollihar, and James M. Musser                                                                                                                                                                                                                                                                                                                    |
| EPI_ISL_1081151                                                                                                                                                                                                                                                                                                                                                                                                                                                                                                                                                                                                                                                                                                                                                                                                                                                                                                                                                                                                                                                                                                                                                                                                                                                                                                                                                                                                                                                                                                                                                                                                                                                                                                                                                                                                                                                                                                                                                                                                                                                                                                                                                                                                                                                                                                                                                                                                                                                                                                                                                                                                                                                                                                                                                                                                                                                                                                                                                                                                                                                                                                                                                                                     | Baylor Scott & White-Temple                                                                                                 | Baylor Scott & White-Temple                                                                                                                | Ari Rao, Linden Morales, Kimberly Walker, Marcus Volz, Shelby Hendrickson                                                                                                                                                                                                                                                                                                                                                                                                                                                                                                                       |
| EPI_ISL_1081170                                                                                                                                                                                                                                                                                                                                                                                                                                                                                                                                                                                                                                                                                                                                                                                                                                                                                                                                                                                                                                                                                                                                                                                                                                                                                                                                                                                                                                                                                                                                                                                                                                                                                                                                                                                                                                                                                                                                                                                                                                                                                                                                                                                                                                                                                                                                                                                                                                                                                                                                                                                                                                                                                                                                                                                                                                                                                                                                                                                                                                                                                                                                                                                     | IEH Laboratories & Consulting Group                                                                                         | ID Genomics                                                                                                                                | Veronika Tchesnokova, Kirith Kutumbaka, Kai Deng, Hemantha Kulakesara, Lydia Larson, Hao Geng, Curtis Fowler, Mansour Samadpour, Evgeni Sokurenko                                                                                                                                                                                                                                                                                                                                                                                                                                               |
| EPI_ISL_1081185, EPI_ISL_1081187, EPI_ISL_1081188                                                                                                                                                                                                                                                                                                                                                                                                                                                                                                                                                                                                                                                                                                                                                                                                                                                                                                                                                                                                                                                                                                                                                                                                                                                                                                                                                                                                                                                                                                                                                                                                                                                                                                                                                                                                                                                                                                                                                                                                                                                                                                                                                                                                                                                                                                                                                                                                                                                                                                                                                                                                                                                                                                                                                                                                                                                                                                                                                                                                                                                                                                                                                   | Baylor Scott & White-Temple                                                                                                 | Baylor Scott & White-Temple                                                                                                                | Ari Rao, Linden Morales, Kimberly Walker, Marcus Volz, Shelby Hendrickson                                                                                                                                                                                                                                                                                                                                                                                                                                                                                                                       |
| EPI_ISL_1081201                                                                                                                                                                                                                                                                                                                                                                                                                                                                                                                                                                                                                                                                                                                                                                                                                                                                                                                                                                                                                                                                                                                                                                                                                                                                                                                                                                                                                                                                                                                                                                                                                                                                                                                                                                                                                                                                                                                                                                                                                                                                                                                                                                                                                                                                                                                                                                                                                                                                                                                                                                                                                                                                                                                                                                                                                                                                                                                                                                                                                                                                                                                                                                                     | Laboratory Corporation of America                                                                                           | Respiratory Viruses Branch, Division of Viral Diseases, Centers for Disease Control and Prevention                                         | Peter W. Cook, Dakota Howard, Dhvani Batra, Ben L. Rambo-Martin, Eileen de Feo, Jan Antico, Christine Tran, Matthew Tolentino, Shannon Wickline, Kim Gietzen, Brad Sickler, Jingtao Liu, Eric Allen, Phil Febbo, Summer Galloway, Nicole L. Washington, Simon White, Geraint Levan, Kelly Schiabor Barrett, Elizabeth Cirulli, Alexandre Bolze, Ary Ascencio, Charlotte Rivera-Garcia, Ryan Cho, Jason Nguyen, Sherry Wang, Jimmy Ramirez, Tyler Cassens, Efrén Sandoval, Magnus Isaksson, William Lee, David Becker, Marc Laurent, James Lu, Clinton R. Paden, Xuxiang Tong, Duncan MacCannell |
| EPI_ISL_1081424, EPI_ISL_1081425, EPI_ISL_1081426, EPI_ISL_1081429, EPI_ISL_1081431, EPI_ISL_1081435, EPI_ISL_1081436, EPI_ISL_1081437, EPI_ISL_1081439, EPI_ISL_1081441, EPI_ISL_1081444, EPI_ISL_1081451, EPI_ISL_1081453, EPI_ISL_1081454                                                                                                                                                                                                                                                                                                                                                                                                                                                                                                                                                                                                                                                                                                                                                                                                                                                                                                                                                                                                                                                                                                                                                                                                                                                                                                                                                                                                                                                                                                                                                                                                                                                                                                                                                                                                                                                                                                                                                                                                                                                                                                                                                                                                                                                                                                                                                                                                                                                                                                                                                                                                                                                                                                                                                                                                                                                                                                                                                        |                                                                                                                             |                                                                                                                                            |                                                                                                                                                                                                                                                                                                                                                                                                                                                                                                                                                                                                 |
| see above                                                                                                                                                                                                                                                                                                                                                                                                                                                                                                                                                                                                                                                                                                                                                                                                                                                                                                                                                                                                                                                                                                                                                                                                                                                                                                                                                                                                                                                                                                                                                                                                                                                                                                                                                                                                                                                                                                                                                                                                                                                                                                                                                                                                                                                                                                                                                                                                                                                                                                                                                                                                                                                                                                                                                                                                                                                                                                                                                                                                                                                                                                                                                                                           | Genomica Lab Molecular, M@xico                                                                                              | Andersen lab at Scripps Research                                                                                                           | SEARCH Alliance San Diego with Jonathan Gonzalez Garcia, Jose Roman Chavez Mendez, Jose Horacio Reyna Verdugo, Martin Gonzalez Ibarra, Luis Alberto Rangel Gonzalez                                                                                                                                                                                                                                                                                                                                                                                                                             |
| EPI_ISL_1081457, EPI_ISL_1081458                                                                                                                                                                                                                                                                                                                                                                                                                                                                                                                                                                                                                                                                                                                                                                                                                                                                                                                                                                                                                                                                                                                                                                                                                                                                                                                                                                                                                                                                                                                                                                                                                                                                                                                                                                                                                                                                                                                                                                                                                                                                                                                                                                                                                                                                                                                                                                                                                                                                                                                                                                                                                                                                                                                                                                                                                                                                                                                                                                                                                                                                                                                                                                    | San Diego County Public Health Laboratory                                                                                   | Andersen lab at Scripps Research                                                                                                           | SEARCH Alliance San Diego with Tracy Basler, Jovan Shephard, Brett Austin                                                                                                                                                                                                                                                                                                                                                                                                                                                                                                                       |
| EPI_ISL_1081476, EPI_ISL_1081477, EPI_ISL_1081478, EPI_ISL_1081479, EPI_ISL_1081480, EPI_ISL_1081481, EPI_ISL_1081482, EPI_ISL_1081483, EPI_ISL_1081484, EPI_ISL_1081489                                                                                                                                                                                                                                                                                                                                                                                                                                                                                                                                                                                                                                                                                                                                                                                                                                                                                                                                                                                                                                                                                                                                                                                                                                                                                                                                                                                                                                                                                                                                                                                                                                                                                                                                                                                                                                                                                                                                                                                                                                                                                                                                                                                                                                                                                                                                                                                                                                                                                                                                                                                                                                                                                                                                                                                                                                                                                                                                                                                                                            | Genomica Lab Molecular, M@xico                                                                                              | Andersen lab at Scripps Research                                                                                                           | SEARCH Alliance San Diego with Jonathan Gonzalez Garcia, Jose Roman Chavez Mendez, Jose Horacio Reyna Verdugo, Martin Gonzalez Ibarra, Luis Alberto Rangel Gonzalez                                                                                                                                                                                                                                                                                                                                                                                                                             |
| EPI_ISL_1081954                                                                                                                                                                                                                                                                                                                                                                                                                                                                                                                                                                                                                                                                                                                                                                                                                                                                                                                                                                                                                                                                                                                                                                                                                                                                                                                                                                                                                                                                                                                                                                                                                                                                                                                                                                                                                                                                                                                                                                                                                                                                                                                                                                                                                                                                                                                                                                                                                                                                                                                                                                                                                                                                                                                                                                                                                                                                                                                                                                                                                                                                                                                                                                                     | "Stefan S. Nicolau" Institute of Virology                                                                                   | "Stefan S. Nicolau" Institute of Virology                                                                                                  | Anca Botezatu, Iulia Virginia Iancu, Coralia Bleotu, Mihaela Economescu, Laura Necula, Denisa Dragu, Lilia Matei, Ioana Pitica, Marinela Bostan, Mirela Mihaila, Laura Grecu, Camelia Sultana, Simona Ruta, Ana Iulia Neagu, Adriana Plesa, Saviana Nedeianu, Alina Nastasie, Cristina Mambet, Gabriela Anton, Carmen Cristina Diaconu.                                                                                                                                                                                                                                                         |
| EPI_ISL_1081958, EPI_ISL_1082290, EPI_ISL_1082291, EPI_ISL_1082294                                                                                                                                                                                                                                                                                                                                                                                                                                                                                                                                                                                                                                                                                                                                                                                                                                                                                                                                                                                                                                                                                                                                                                                                                                                                                                                                                                                                                                                                                                                                                                                                                                                                                                                                                                                                                                                                                                                                                                                                                                                                                                                                                                                                                                                                                                                                                                                                                                                                                                                                                                                                                                                                                                                                                                                                                                                                                                                                                                                                                                                                                                                                  | "Stefan S. Nicolau" Institute of Virology                                                                                   | "Stefan S. Nicolau" Institute of Virology                                                                                                  | Anca Botezatu, Iulia Virginia Iancu, Coralia Bleotu, Mihaela Economescu, Laura Necula, Denisa Dragu, Lilia Matei, Ioana Pitica, Marinela Bostan, Mirela Mihaila, Laura Grecu, Camelia Sultana, Simona Ruta, Ana Iulia Neagu, Adriana Plesa, Saviana Nedeianu, Alina Nastasie, Cristina Mambet, Gabriela Anton, Carmen Cristina Diaconu                                                                                                                                                                                                                                                          |
| EPI_ISL_1082296                                                                                                                                                                                                                                                                                                                                                                                                                                                                                                                                                                                                                                                                                                                                                                                                                                                                                                                                                                                                                                                                                                                                                                                                                                                                                                                                                                                                                                                                                                                                                                                                                                                                                                                                                                                                                                                                                                                                                                                                                                                                                                                                                                                                                                                                                                                                                                                                                                                                                                                                                                                                                                                                                                                                                                                                                                                                                                                                                                                                                                                                                                                                                                                     | "Stefan S. Nicolau" Institute of Virology                                                                                   | 285 Mihai Bravu Ave, Bucharest, Romania                                                                                                    | Anca Botezatu, Iulia Virginia Iancu, Coralia Bleotu, Mihaela Economescu, Laura Necula, Denisa Dragu, Lilia Matei, Ioana Pitica, Marinela Bostan, Mirela Mihaila, Laura Grecu, Camelia Sultana, Simona Ruta, Ana Iulia Neagu, Adriana Plesa, Saviana Nedeianu, Alina Nastasie, Cristina Mambet, Gabriela Anton, Carmen Cristina Diaconu                                                                                                                                                                                                                                                          |
| EPI_ISL_1082299, EPI_ISL_1082300, EPI_ISL_1082301, EPI_ISL_1082302, EPI_ISL_1082306, EPI_ISL_1082307, EPI_ISL_1082309, EPI_ISL_1082311, EPI_ISL_1082314, EPI_ISL_1082315                                                                                                                                                                                                                                                                                                                                                                                                                                                                                                                                                                                                                                                                                                                                                                                                                                                                                                                                                                                                                                                                                                                                                                                                                                                                                                                                                                                                                                                                                                                                                                                                                                                                                                                                                                                                                                                                                                                                                                                                                                                                                                                                                                                                                                                                                                                                                                                                                                                                                                                                                                                                                                                                                                                                                                                                                                                                                                                                                                                                                            | Laboratory of Virology of Federal Budget Health Care Institution "Center of Hygiene and Epidemiology in Arkhangelsk region" | Group of Genomics and Postgenomic Technologies of Central Research Institute of Epidemiology                                               | Samoilov AE, Kaptelova VV, Korneenko EV, Valdokhina AV, Bulanenko VP, Saenko SS, Semyina LV, Ponomareva YA, Shishko LA, Cherkashina AS, Golubeva AG, Speranskaya AS, Tivanova EV, Kondrasheva LV, Akimkin VG                                                                                                                                                                                                                                                                                                                                                                                    |
| EPI_ISL_1085534, EPI_ISL_1085674                                                                                                                                                                                                                                                                                                                                                                                                                                                                                                                                                                                                                                                                                                                                                                                                                                                                                                                                                                                                                                                                                                                                                                                                                                                                                                                                                                                                                                                                                                                                                                                                                                                                                                                                                                                                                                                                                                                                                                                                                                                                                                                                                                                                                                                                                                                                                                                                                                                                                                                                                                                                                                                                                                                                                                                                                                                                                                                                                                                                                                                                                                                                                                    | Hôpital Henri Mondor                                                                                                        | Department of Virology, Henri Mondor University Hospital, Assistance Publique Hôpitaux de Paris, Université Paris-Est Créteil, INSERM U955 | Christophe Rodriguez, Slim Fourati, Vanessa Demontant, Guillaume Gricourt, Melissa N'Debi, Alexandre Soulier, Elisabeth Trawinski, Jean-Michel Pawlitsky                                                                                                                                                                                                                                                                                                                                                                                                                                        |
| EPI_ISL_1086375, EPI_ISL_1086376                                                                                                                                                                                                                                                                                                                                                                                                                                                                                                                                                                                                                                                                                                                                                                                                                                                                                                                                                                                                                                                                                                                                                                                                                                                                                                                                                                                                                                                                                                                                                                                                                                                                                                                                                                                                                                                                                                                                                                                                                                                                                                                                                                                                                                                                                                                                                                                                                                                                                                                                                                                                                                                                                                                                                                                                                                                                                                                                                                                                                                                                                                                                                                    | LACEN - Laboratório Central de Saúde Pública do Rio Grande do Norte                                                         | Evandro Chagas Institute                                                                                                                   | Santos, M.C.; Silva, A.M.; Junior, W.D.C.; Barbagelata, L.S.; Ferreira, J.A.; Sousa, E.M.A.; da Silva, P.S.; Pinheiro, K.C.; L.C.; Sousa Junior, E.C.                                                                                                                                                                                                                                                                                                                                                                                                                                           |
| EPI_ISL_1086377                                                                                                                                                                                                                                                                                                                                                                                                                                                                                                                                                                                                                                                                                                                                                                                                                                                                                                                                                                                                                                                                                                                                                                                                                                                                                                                                                                                                                                                                                                                                                                                                                                                                                                                                                                                                                                                                                                                                                                                                                                                                                                                                                                                                                                                                                                                                                                                                                                                                                                                                                                                                                                                                                                                                                                                                                                                                                                                                                                                                                                                                                                                                                                                     | LACEN - Laboratório Central de Saúde Pública do Paraíba                                                                     | Evandro Chagas Institute                                                                                                                   | Santos, M.C.; Silva, A.M.; Junior, W.D.C.; Barbagelata, L.S.; Ferreira, J.A.; Sousa, E.M.A.; da Silva, P.S.; Pinheiro, K.C.; L.C.; Sousa Junior, E.C.                                                                                                                                                                                                                                                                                                                                                                                                                                           |
| EPI_ISL_1092124, EPI_ISL_1092256, EPI_ISL_1092258, EPI_ISL_1092279, EPI_ISL_1092286, EPI_ISL_1092290, EPI_ISL_1092291, EPI_ISL_1092293, EPI_ISL_1092294, EPI_ISL_1092297, EPI_ISL_1092304, EPI_ISL_1092321                                                                                                                                                                                                                                                                                                                                                                                                                                                                                                                                                                                                                                                                                                                                                                                                                                                                                                                                                                                                                                                                                                                                                                                                                                                                                                                                                                                                                                                                                                                                                                                                                                                                                                                                                                                                                                                                                                                                                                                                                                                                                                                                                                                                                                                                                                                                                                                                                                                                                                                                                                                                                                                                                                                                                                                                                                                                                                                                                                                          |                                                                                                                             |                                                                                                                                            |                                                                                                                                                                                                                                                                                                                                                                                                                                                                                                                                                                                                 |



|                                                                                                                                                                                                                                                                                                                                                                                                                                                                                                                                                                |                                                                                                          |                                                                                                                                        |                                                                                                                                                                                                                                                                                                                                                                                                                                                  |
|----------------------------------------------------------------------------------------------------------------------------------------------------------------------------------------------------------------------------------------------------------------------------------------------------------------------------------------------------------------------------------------------------------------------------------------------------------------------------------------------------------------------------------------------------------------|----------------------------------------------------------------------------------------------------------|----------------------------------------------------------------------------------------------------------------------------------------|--------------------------------------------------------------------------------------------------------------------------------------------------------------------------------------------------------------------------------------------------------------------------------------------------------------------------------------------------------------------------------------------------------------------------------------------------|
| EPI_ISL_1110492, EPI_ISL_1110493, EPI_ISL_1110494                                                                                                                                                                                                                                                                                                                                                                                                                                                                                                              |                                                                                                          |                                                                                                                                        |                                                                                                                                                                                                                                                                                                                                                                                                                                                  |
| EPI_ISL_1110844                                                                                                                                                                                                                                                                                                                                                                                                                                                                                                                                                | Virginia Division of Consolidated Laboratory Services                                                    | Virginia Division of Consolidated Laboratory Services                                                                                  | Virginia DCLS                                                                                                                                                                                                                                                                                                                                                                                                                                    |
| EPI_ISL_1111133, EPI_ISL_1111134, EPI_ISL_1111135, EPI_ISL_1111137, EPI_ISL_1111143, EPI_ISL_1111144, EPI_ISL_1111146, EPI_ISL_1111148, EPI_ISL_1111149, EPI_ISL_1111150, EPI_ISL_1111151, EPI_ISL_1111152, EPI_ISL_1111154, EPI_ISL_1111155, EPI_ISL_1111158, EPI_ISL_1111314, EPI_ISL_1111315, EPI_ISL_1111463, EPI_ISL_1111464, EPI_ISL_1111467, EPI_ISL_1111476, EPI_ISL_1111480, EPI_ISL_1111482, EPI_ISL_1111483, EPI_ISL_1111495, EPI_ISL_1111502                                                                                                       |                                                                                                          |                                                                                                                                        |                                                                                                                                                                                                                                                                                                                                                                                                                                                  |
| see above                                                                                                                                                                                                                                                                                                                                                                                                                                                                                                                                                      | Laboratorio de Referencia Nacional de Virus Respiratorio. Instituto Nacional de Salud Perú               | Laboratorio de Referencia Nacional de Enteropatógenos. Instituto Nacional de Salud del Perú                                            | Ronnie Gavilan Chavez, Junior Caro Castro, Willi Quino Sifuentes, Veronica Hurtado Vela, Iris Silva Molina, Fiorella Orellana Peralta                                                                                                                                                                                                                                                                                                            |
| EPI_ISL_1111508, EPI_ISL_1111580, EPI_ISL_1111584, EPI_ISL_1111588, EPI_ISL_1111590, EPI_ISL_1111591, EPI_ISL_1111592, EPI_ISL_1111596, EPI_ISL_1111597, EPI_ISL_1111598, EPI_ISL_1111600, EPI_ISL_1111601, EPI_ISL_1111605                                                                                                                                                                                                                                                                                                                                    |                                                                                                          |                                                                                                                                        |                                                                                                                                                                                                                                                                                                                                                                                                                                                  |
| see above                                                                                                                                                                                                                                                                                                                                                                                                                                                                                                                                                      | Virginia Division of Consolidated Laboratory Services                                                    | Virginia Division of Consolidated Laboratory Services                                                                                  | Virginia DCLS                                                                                                                                                                                                                                                                                                                                                                                                                                    |
| EPI_ISL_1112753                                                                                                                                                                                                                                                                                                                                                                                                                                                                                                                                                | Public Health Center of Ukraine                                                                          | Charite Universitätsmedizin Berlin, Institute of Virology                                                                              | Victor M Corman, Barbara Mühlemann, Jörn Beheim-Schwarzbach, Talitha Veith, Julia Schneider, Terry Jones, Roman Rodyna, Ihor Kuzin, Liudmyla Chernenko, Iryna Demchyshyna, Christian Drosten                                                                                                                                                                                                                                                     |
| EPI_ISL_1114406                                                                                                                                                                                                                                                                                                                                                                                                                                                                                                                                                | Wyoming Public Health Laboratory                                                                         | Wyoming Public Health Laboratory                                                                                                       | Jim Mildenberger, Wanda Manley, Noah Hull, Taylor Fearing, Lynette Gumbleton, Channing Weber, Ashley Norberg, Chayse Rowley, Marley Goetz, Brian Dominguez, Elliot Thomasson, Cari Sloma, and Rob Christensen                                                                                                                                                                                                                                    |
| EPI_ISL_1115111                                                                                                                                                                                                                                                                                                                                                                                                                                                                                                                                                | Lighthouse Lab in Glasgow                                                                                | Wellcome Sanger Institute for the COVID-19 Genomics UK (COG-UK) Consortium                                                             | Harper VanSteenhouse, Yumi Kasai, David Gray, Carol Clugston, Anna Dominiczak and Alex Alderton, Roberto Amato, Jeffrey Barrett, Sonia Goncalves, Ewan Harrison, David K. Jackson, Ian Johnston, Dominic Kwiatkowski, Cordelia Langford, John Sillitoe on behalf of the Wellcome Sanger Institute COVID-19 Surveillance Team                                                                                                                     |
| EPI_ISL_1117376                                                                                                                                                                                                                                                                                                                                                                                                                                                                                                                                                | Beijing Center for Disease Prevention and Control                                                        | Beijing Center for Disease Prevention and Control                                                                                      | Yang Pan, Shujuan Cui, Fu Li, Zhaomin Feng, Bing Lyu, Zhichao Liang, Lijuan Chen, Daitao Zhang, Quanyi Wang                                                                                                                                                                                                                                                                                                                                      |
| EPI_ISL_1117377                                                                                                                                                                                                                                                                                                                                                                                                                                                                                                                                                | Beijing Center for Disease Prevention and Control                                                        | Beijing Center for Disease Prevention and Control                                                                                      | Yang Pan, Fu Li, Zhaomin Feng, Shujuan Cui, Bing Lyu, Zhichao Liang, Lijuan Chen, Daitao Zhang, Quanyi Wang                                                                                                                                                                                                                                                                                                                                      |
| EPI_ISL_1117378                                                                                                                                                                                                                                                                                                                                                                                                                                                                                                                                                | Beijing Center for Disease Prevention and Control                                                        | Beijing Center for Disease Prevention and Control                                                                                      | Yang Pan, Zhaomin Feng, Fu Li, Shujuan Cui, Bing Lyu, Zhichao Liang, Lijuan Chen, Daitao Zhang, Quanyi Wang                                                                                                                                                                                                                                                                                                                                      |
| EPI_ISL_1118117, EPI_ISL_1118118, EPI_ISL_1118119, EPI_ISL_1118120, EPI_ISL_1118121                                                                                                                                                                                                                                                                                                                                                                                                                                                                            | Dept. of Microbiology and Infection Control, Akershus University Hospital HF                             | Dept. of Microbiology and Infection Control, Akershus University Hospital HF                                                           | Hege Vangstein Aamot, Alexander Hesselberg Lovestad                                                                                                                                                                                                                                                                                                                                                                                              |
| EPI_ISL_1118206                                                                                                                                                                                                                                                                                                                                                                                                                                                                                                                                                | National Institute of Health Research and Development                                                    | National Institute of Health Research and Development                                                                                  | Hana Apsari Pawestri, Subangkit, Kartika Dewi Puspa, Arie Ardiansyah Nugraha, Hartanti Dian Ikawati, Krisna Nur Andriana Pangesti, Yuni Rukminiati, Ririn Ramadhany, Agustiniingsih, Kindi Adam, Holy Arif Wibowo, Triyani Soekarso, Ni Ketut Susilarini, Nurika Hariastuti, Uily Alfi Nikmah, Reni Herman, Nike Susanti, Herna, Tati Febriyanti, Natalie Laurencia Kipuw, Fauzul Muna, Irene Lorinda Indalao, Nelly Puspandari, Vivi Setiawaty. |
| EPI_ISL_1118408                                                                                                                                                                                                                                                                                                                                                                                                                                                                                                                                                | Department of Medical Microbiology, St. Olavs hospital                                                   | Norwegian Institute of Public Health, Department of Virology                                                                           | Kathrine Stene-Johansen, Kamilla Heddeland Instefjord, Hilde Elshaug, Garcia Llorente Ignacio, Engebretsen Serina Beate, Pedersen Benedikte Nevjen, Debech Nadia, Atiya R Ali, Marie Paulsen Madsen, Rasmus Riis Kopperud, Hilde Vollan, Karoline Bragstad, Olav Hungnes                                                                                                                                                                         |
| EPI_ISL_1118447                                                                                                                                                                                                                                                                                                                                                                                                                                                                                                                                                | Dept. of Medical Microbiology, Stavanger University Hospital, Helse Stavanger HF                         | Norwegian Institute of Public Health, Department of Virology                                                                           | Kathrine Stene-Johansen, Kamilla Heddeland Instefjord, Hilde Elshaug, Garcia Llorente Ignacio, Engebretsen Serina Beate, Pedersen Benedikte Nevjen, Debech Nadia, Atiya R Ali, Marie Paulsen Madsen, Rasmus Riis Kopperud, Hilde Vollan, Karoline Bragstad, Olav Hungnes                                                                                                                                                                         |
| EPI_ISL_1118463, EPI_ISL_1118464                                                                                                                                                                                                                                                                                                                                                                                                                                                                                                                               | Department of Medical Microbiology, St. Olavs hospital                                                   | Norwegian Institute of Public Health, Department of Virology                                                                           | Kathrine Stene-Johansen, Kamilla Heddeland Instefjord, Hilde Elshaug, Garcia Llorente Ignacio, Engebretsen Serina Beate, Pedersen Benedikte Nevjen, Debech Nadia, Atiya R Ali, Marie Paulsen Madsen, Rasmus Riis Kopperud, Hilde Vollan, Karoline Bragstad, Olav Hungnes                                                                                                                                                                         |
| EPI_ISL_1118467                                                                                                                                                                                                                                                                                                                                                                                                                                                                                                                                                | Akershus University Hospital, Department for Microbiology and Infectious Disease Control                 | Norwegian Institute of Public Health, Department of Virology                                                                           | Kathrine Stene-Johansen, Kamilla Heddeland Instefjord, Hilde Elshaug, Garcia Llorente Ignacio, Engebretsen Serina Beate, Pedersen Benedikte Nevjen, Debech Nadia, Atiya R Ali, Marie Paulsen Madsen, Rasmus Riis Kopperud, Hilde Vollan, Karoline Bragstad, Olav Hungnes                                                                                                                                                                         |
| EPI_ISL_1120580, EPI_ISL_1120584                                                                                                                                                                                                                                                                                                                                                                                                                                                                                                                               | Dutch COVID-19 response team                                                                             | Medical Microbiology, Maastricht University Medical Centre                                                                             | Jozef Dingemans*, Brian van der Veer*, Erik Beuken, Carmen Reumkens, Lieke van Alphen, Christian Hoebe, Paul Savelkoul                                                                                                                                                                                                                                                                                                                           |
| EPI_ISL_1120823, EPI_ISL_1120828, EPI_ISL_1120829, EPI_ISL_1120830                                                                                                                                                                                                                                                                                                                                                                                                                                                                                             | ICH-SION                                                                                                 | Laboratory of genomics and metagenomics, Institute of Microbiology, University Hospital Centre and University of Lausanne, Switzerland | Trestan Pillonel, Damien Jacot, Sébastien Aeby, Gilbert Greub, Claire Bertelli                                                                                                                                                                                                                                                                                                                                                                   |
| EPI_ISL_1120945, EPI_ISL_1120946, EPI_ISL_1120948, EPI_ISL_1120949, EPI_ISL_1120950, EPI_ISL_1120955, EPI_ISL_1120956, EPI_ISL_1120957                                                                                                                                                                                                                                                                                                                                                                                                                         | Hospital Universitario 12 de Octubre                                                                     | SeqCOVID-SPAIN consortium/IBV(CSIC)                                                                                                    | Esther Viedma, Raúl Recio, Irene Muñoz-Gallego, Jennifer Villa, Rafael Delgado, Mª Dolores Folgueira and SeqCOVID-SPAIN consortium/consortium                                                                                                                                                                                                                                                                                                    |
| EPI_ISL_1122059                                                                                                                                                                                                                                                                                                                                                                                                                                                                                                                                                | OHSU Lab Services Molecular Microbiology Lab                                                             | Oregon SARS-CoV-2 Genome Sequencing Center                                                                                             | Brendan L. O'Connell, Sally Grindstaff, Kayla Carter, Ruth V. Nichols, Alec J. Hirsch, Donna Hansel, Guang Fan, Xuan, Qin, Daniel N. Streblow, William B. Messer, Andrew C. Adey, Benjamin N. Bimber, Brian J. O'Roak                                                                                                                                                                                                                            |
| EPI_ISL_1123290                                                                                                                                                                                                                                                                                                                                                                                                                                                                                                                                                | University of Chittagong                                                                                 | Central Biological Research Laboratory and Department of Biochemistry and Molecular Biology                                            | H. M. Abdullah Al Masud, Mohammad Omar Faruque, Md. Arif Hossain, Shanta Paul, Md. Khondakar Raziur Rahman, Imam Hossen, Sajib Rudra, Md. Omer Faruq, Md. Imranul Hoq, Robiul Hasan Bhuiyan                                                                                                                                                                                                                                                      |
| EPI_ISL_1123291, EPI_ISL_1123292                                                                                                                                                                                                                                                                                                                                                                                                                                                                                                                               | University of Chittagong                                                                                 | Central Biological Research Laboratory and Department of Biochemistry and Molecular Biology                                            | Robiul Hasan Bhuiyan, Md. Imranul Hoq, Md. Khondakar Raziur Rahman, Imam Hossen, Sajib Rudra, Md. Arif Hossain, Shanta Paul, Md. Omer Faruq, H. M. Abdullah Al Masud, Mohammad Omar Faruque                                                                                                                                                                                                                                                      |
| EPI_ISL_1123432, EPI_ISL_1123433                                                                                                                                                                                                                                                                                                                                                                                                                                                                                                                               | Pathogen Genomics Center, National Institute of Infectious Diseases                                      | Pathogen Genomics Center, National Institute of Infectious Diseases                                                                    | Tsuyoshi Sekizuka, Kentaro Itokawa, Rina Tanaka, Masanori Hashino, Makoto Kuroda                                                                                                                                                                                                                                                                                                                                                                 |
| EPI_ISL_1123437                                                                                                                                                                                                                                                                                                                                                                                                                                                                                                                                                | Gunma Prefectural Institute of Public Health and Environmental Sciences                                  | Pathogen Genomics Center, National Institute of Infectious Diseases                                                                    | Tsuyoshi Sekizuka, Kentaro Itokawa, Rina Tanaka, Masanori Hashino, Makoto Kuroda                                                                                                                                                                                                                                                                                                                                                                 |
| EPI_ISL_1123459, EPI_ISL_1123460, EPI_ISL_1123465, EPI_ISL_1123466, EPI_ISL_1123488, EPI_ISL_1123489, EPI_ISL_1123490, EPI_ISL_1123491, EPI_ISL_1123492, EPI_ISL_1123493, EPI_ISL_1123494, EPI_ISL_1123496, EPI_ISL_1123498, EPI_ISL_1123501, EPI_ISL_1123502, EPI_ISL_1123504, EPI_ISL_1123506                                                                                                                                                                                                                                                                | Pathogen Genomics Center, National Institute of Infectious Diseases                                      | Pathogen Genomics Center, National Institute of Infectious Diseases                                                                    | Tsuyoshi Sekizuka, Kentaro Itokawa, Rina Tanaka, Masanori Hashino, Makoto Kuroda                                                                                                                                                                                                                                                                                                                                                                 |
| see above                                                                                                                                                                                                                                                                                                                                                                                                                                                                                                                                                      | Pathogen Genomics Center, National Institute of Infectious Diseases                                      | Pathogen Genomics Center, National Institute of Infectious Diseases                                                                    | Tsuyoshi Sekizuka, Kentaro Itokawa, Rina Tanaka, Masanori Hashino, Makoto Kuroda                                                                                                                                                                                                                                                                                                                                                                 |
| EPI_ISL_1123525, EPI_ISL_1123527, EPI_ISL_1123529, EPI_ISL_1123531, EPI_ISL_1123532, EPI_ISL_1123534, EPI_ISL_1123536, EPI_ISL_1123538, EPI_ISL_1123540, EPI_ISL_1123541, EPI_ISL_1123543, EPI_ISL_1123545, EPI_ISL_1123547, EPI_ISL_1123548, EPI_ISL_1123550, EPI_ISL_1123552, EPI_ISL_1123553, EPI_ISL_1123555, EPI_ISL_1123557, EPI_ISL_1123559, EPI_ISL_1123561, EPI_ISL_1123563, EPI_ISL_1123564, EPI_ISL_1123566, EPI_ISL_1123568, EPI_ISL_1123570, EPI_ISL_1123572, EPI_ISL_1123574, EPI_ISL_1123576, EPI_ISL_1123577, EPI_ISL_1123579, EPI_ISL_1123581 | Pathogen Genomics Center, National Institute of Infectious Diseases                                      | Tsuyoshi Sekizuka, Kentaro Itokawa, Rina Tanaka, Masanori Hashino, Makoto Kuroda                                                       |                                                                                                                                                                                                                                                                                                                                                                                                                                                  |
| see above                                                                                                                                                                                                                                                                                                                                                                                                                                                                                                                                                      | Gunma Prefectural Institute of Public Health and Environmental Sciences                                  | Pathogen Genomics Center, National Institute of Infectious Diseases                                                                    | Tsuyoshi Sekizuka, Kentaro Itokawa, Rina Tanaka, Masanori Hashino, Makoto Kuroda                                                                                                                                                                                                                                                                                                                                                                 |
| EPI_ISL_1123625                                                                                                                                                                                                                                                                                                                                                                                                                                                                                                                                                | Department of Virus and Microbiological Special Diagnostics, Statens Serum Institut, Copenhagen, Denmark | Aalborg University                                                                                                                     | Danish Covid-19 Genome Consortium                                                                                                                                                                                                                                                                                                                                                                                                                |
| EPI_ISL_1123667, EPI_ISL_1123669, EPI_ISL_1123671, EPI_ISL_1123673, EPI_ISL_1123674, EPI_ISL_1123676, EPI_ISL_1123678, EPI_ISL_1123683, EPI_ISL_1123685, EPI_ISL_1123792                                                                                                                                                                                                                                                                                                                                                                                       | Pathogen Genomics Center, National Institute of Infectious Diseases                                      | Pathogen Genomics Center, National Institute of Infectious Diseases                                                                    | Tsuyoshi Sekizuka, Kentaro Itokawa, Rina Tanaka, Masanori Hashino, Makoto Kuroda                                                                                                                                                                                                                                                                                                                                                                 |
| EPI_ISL_1123867                                                                                                                                                                                                                                                                                                                                                                                                                                                                                                                                                | Department of Virus and Microbiological Special Diagnostics, Statens Serum Institut, Copenhagen, Denmark | Aalborg University                                                                                                                     | Danish Covid-19 Genome Consortium                                                                                                                                                                                                                                                                                                                                                                                                                |
| EPI_ISL_1123909, EPI_ISL_1123911, EPI_ISL_1123913, EPI_ISL_1123915, EPI_ISL_1123916, EPI_ISL_1123918, EPI_ISL_1123920, EPI_ISL_1123922, EPI_ISL_1123924, EPI_ISL_1123926, EPI_ISL_1123927, EPI_ISL_1123929, EPI_ISL_1123931, EPI_ISL_1123933, EPI_ISL_1123935, EPI_ISL_1123937, EPI_ISL_1123938, EPI_ISL_1123940, EPI_ISL_1123942, EPI_ISL_1123944, EPI_ISL_1123946, EPI_ISL_1123948                                                                                                                                                                           |                                                                                                          |                                                                                                                                        |                                                                                                                                                                                                                                                                                                                                                                                                                                                  |
| see above                                                                                                                                                                                                                                                                                                                                                                                                                                                                                                                                                      | Pathogen Genomics Center, National Institute of Infectious Diseases                                      | Pathogen Genomics Center, National Institute of Infectious Diseases                                                                    | Tsuyoshi Sekizuka, Kentaro Itokawa, Rina Tanaka, Masanori Hashino, Makoto Kuroda                                                                                                                                                                                                                                                                                                                                                                 |

|                                                                                                                                                                                                                                                                                                                                                                                                                                                                                                                                                                                                                                                                                                                                                                                                                                                                                                                                                                                                                                                                                                                                                                                                                                                                                     |                                                                                                             |                                                                        |                                                                                  |
|-------------------------------------------------------------------------------------------------------------------------------------------------------------------------------------------------------------------------------------------------------------------------------------------------------------------------------------------------------------------------------------------------------------------------------------------------------------------------------------------------------------------------------------------------------------------------------------------------------------------------------------------------------------------------------------------------------------------------------------------------------------------------------------------------------------------------------------------------------------------------------------------------------------------------------------------------------------------------------------------------------------------------------------------------------------------------------------------------------------------------------------------------------------------------------------------------------------------------------------------------------------------------------------|-------------------------------------------------------------------------------------------------------------|------------------------------------------------------------------------|----------------------------------------------------------------------------------|
| EPI_ISL_1124040                                                                                                                                                                                                                                                                                                                                                                                                                                                                                                                                                                                                                                                                                                                                                                                                                                                                                                                                                                                                                                                                                                                                                                                                                                                                     | Department of Virus and Microbiological Special Diagnostics,<br>Statens Serum Institut, Copenhagen, Denmark | Aalborg University                                                     | Danish Covid-19 Genome Consortium                                                |
| EPI_ISL_1124095, EPI_ISL_1124097,<br>EPI_ISL_1124099, EPI_ISL_1124101,<br>EPI_ISL_1124102, EPI_ISL_1124104                                                                                                                                                                                                                                                                                                                                                                                                                                                                                                                                                                                                                                                                                                                                                                                                                                                                                                                                                                                                                                                                                                                                                                          | Toyama Institute of Health                                                                                  | Pathogen Genomics Center, National Institute of Infectious<br>Diseases | Tsuyoshi Sekizuka, Kentaro Itokawa, Rina Tanaka, Masanori Hashino, Makoto Kuroda |
| EPI_ISL_1124160                                                                                                                                                                                                                                                                                                                                                                                                                                                                                                                                                                                                                                                                                                                                                                                                                                                                                                                                                                                                                                                                                                                                                                                                                                                                     | Department of Virus and Microbiological Special Diagnostics,<br>Statens Serum Institut, Copenhagen, Denmark | Aalborg University                                                     | Danish Covid-19 Genome Consortium                                                |
| EPI_ISL_1124201, EPI_ISL_1124203,<br>EPI_ISL_1124205, EPI_ISL_1124207                                                                                                                                                                                                                                                                                                                                                                                                                                                                                                                                                                                                                                                                                                                                                                                                                                                                                                                                                                                                                                                                                                                                                                                                               | Toyama Institute of Health                                                                                  | Pathogen Genomics Center, National Institute of Infectious<br>Diseases | Tsuyoshi Sekizuka, Kentaro Itokawa, Rina Tanaka, Masanori Hashino, Makoto Kuroda |
| EPI_ISL_1124208, EPI_ISL_1124210, EPI_ISL_1124212, EPI_ISL_1124213, EPI_ISL_1124215, EPI_ISL_1124217, EPI_ISL_1124219, EPI_ISL_1124221, EPI_ISL_1124222, EPI_ISL_1124224, EPI_ISL_1124226, EPI_ISL_1124227, EPI_ISL_1124229, EPI_ISL_1124231                                                                                                                                                                                                                                                                                                                                                                                                                                                                                                                                                                                                                                                                                                                                                                                                                                                                                                                                                                                                                                        |                                                                                                             |                                                                        |                                                                                  |
| see above                                                                                                                                                                                                                                                                                                                                                                                                                                                                                                                                                                                                                                                                                                                                                                                                                                                                                                                                                                                                                                                                                                                                                                                                                                                                           | Pathogen Genomics Center, National Institute of Infectious<br>Diseases                                      | Pathogen Genomics Center, National Institute of Infectious<br>Diseases | Tsuyoshi Sekizuka, Kentaro Itokawa, Rina Tanaka, Masanori Hashino, Makoto Kuroda |
| EPI_ISL_1124234, EPI_ISL_1124312                                                                                                                                                                                                                                                                                                                                                                                                                                                                                                                                                                                                                                                                                                                                                                                                                                                                                                                                                                                                                                                                                                                                                                                                                                                    | Department of Virus and Microbiological Special Diagnostics,<br>Statens Serum Institut, Copenhagen, Denmark | Aalborg University                                                     | Danish Covid-19 Genome Consortium                                                |
| EPI_ISL_1124358, EPI_ISL_1124360,<br>EPI_ISL_1124362                                                                                                                                                                                                                                                                                                                                                                                                                                                                                                                                                                                                                                                                                                                                                                                                                                                                                                                                                                                                                                                                                                                                                                                                                                | Pathogen Genomics Center, National Institute of Infectious<br>Diseases                                      | Pathogen Genomics Center, National Institute of Infectious<br>Diseases | Tsuyoshi Sekizuka, Kentaro Itokawa, Rina Tanaka, Masanori Hashino, Makoto Kuroda |
| EPI_ISL_1124363                                                                                                                                                                                                                                                                                                                                                                                                                                                                                                                                                                                                                                                                                                                                                                                                                                                                                                                                                                                                                                                                                                                                                                                                                                                                     | Department of Virus and Microbiological Special Diagnostics,<br>Statens Serum Institut, Copenhagen, Denmark | Aalborg University                                                     | Danish Covid-19 Genome Consortium                                                |
| EPI_ISL_1124364                                                                                                                                                                                                                                                                                                                                                                                                                                                                                                                                                                                                                                                                                                                                                                                                                                                                                                                                                                                                                                                                                                                                                                                                                                                                     | Pathogen Genomics Center, National Institute of Infectious<br>Diseases                                      | Pathogen Genomics Center, National Institute of Infectious<br>Diseases | Tsuyoshi Sekizuka, Kentaro Itokawa, Rina Tanaka, Masanori Hashino, Makoto Kuroda |
| EPI_ISL_1124477, EPI_ISL_1124522,<br>EPI_ISL_1124596, EPI_ISL_1124631                                                                                                                                                                                                                                                                                                                                                                                                                                                                                                                                                                                                                                                                                                                                                                                                                                                                                                                                                                                                                                                                                                                                                                                                               | Department of Virus and Microbiological Special Diagnostics,<br>Statens Serum Institut, Copenhagen, Denmark | Aalborg University                                                     | Danish Covid-19 Genome Consortium                                                |
| EPI_ISL_1124653, EPI_ISL_1124655, EPI_ISL_1124657, EPI_ISL_1124659, EPI_ISL_1124661, EPI_ISL_1124662, EPI_ISL_1124664, EPI_ISL_1124666, EPI_ISL_1124668, EPI_ISL_1124669, EPI_ISL_1124694, EPI_ISL_1124695, EPI_ISL_1124697, EPI_ISL_1124699, EPI_ISL_1124701, EPI_ISL_1124702, EPI_ISL_1124704, EPI_ISL_1124706, EPI_ISL_1124708, EPI_ISL_1124710, EPI_ISL_1124711, EPI_ISL_1124713, EPI_ISL_1124715, EPI_ISL_1124717, EPI_ISL_1124719, EPI_ISL_1124721, EPI_ISL_1124722, EPI_ISL_1124724, EPI_ISL_1124726, EPI_ISL_1124728, EPI_ISL_1124730                                                                                                                                                                                                                                                                                                                                                                                                                                                                                                                                                                                                                                                                                                                                       |                                                                                                             |                                                                        |                                                                                  |
| see above                                                                                                                                                                                                                                                                                                                                                                                                                                                                                                                                                                                                                                                                                                                                                                                                                                                                                                                                                                                                                                                                                                                                                                                                                                                                           | Pathogen Genomics Center, National Institute of Infectious<br>Diseases                                      | Pathogen Genomics Center, National Institute of Infectious<br>Diseases | Tsuyoshi Sekizuka, Kentaro Itokawa, Rina Tanaka, Masanori Hashino, Makoto Kuroda |
| EPI_ISL_1124794, EPI_ISL_1124796                                                                                                                                                                                                                                                                                                                                                                                                                                                                                                                                                                                                                                                                                                                                                                                                                                                                                                                                                                                                                                                                                                                                                                                                                                                    | Department of Virus and Microbiological Special Diagnostics,<br>Statens Serum Institut, Copenhagen, Denmark | Aalborg University                                                     | Danish Covid-19 Genome Consortium                                                |
| EPI_ISL_1124807, EPI_ISL_1124809, EPI_ISL_1124811, EPI_ISL_1124813, EPI_ISL_1124814, EPI_ISL_1124816, EPI_ISL_1124818, EPI_ISL_1124820, EPI_ISL_1124822, EPI_ISL_1124823, EPI_ISL_1124825, EPI_ISL_1124827, EPI_ISL_1124828, EPI_ISL_1124830, EPI_ISL_1124832, EPI_ISL_1124834, EPI_ISL_1124835, EPI_ISL_1124837, EPI_ISL_1124839, EPI_ISL_1124839, EPI_ISL_1124841, EPI_ISL_1124842, EPI_ISL_1124844, EPI_ISL_1124846, EPI_ISL_1124848, EPI_ISL_1124849, EPI_ISL_1124851, EPI_ISL_1124908, EPI_ISL_1124910, EPI_ISL_1124911, EPI_ISL_1124913, EPI_ISL_1124915, EPI_ISL_1124917, EPI_ISL_1124919, EPI_ISL_1124921, EPI_ISL_1124922, EPI_ISL_1124930, EPI_ISL_1124931                                                                                                                                                                                                                                                                                                                                                                                                                                                                                                                                                                                                                |                                                                                                             |                                                                        |                                                                                  |
| see above                                                                                                                                                                                                                                                                                                                                                                                                                                                                                                                                                                                                                                                                                                                                                                                                                                                                                                                                                                                                                                                                                                                                                                                                                                                                           | Pathogen Genomics Center, National Institute of Infectious<br>Diseases                                      | Pathogen Genomics Center, National Institute of Infectious<br>Diseases | Tsuyoshi Sekizuka, Kentaro Itokawa, Rina Tanaka, Masanori Hashino, Makoto Kuroda |
| EPI_ISL_1124989, EPI_ISL_1125053, EPI_ISL_1125132, EPI_ISL_1125134, EPI_ISL_1125211, EPI_ISL_1125326, EPI_ISL_1125344, EPI_ISL_1125345, EPI_ISL_1125372, EPI_ISL_1125432, EPI_ISL_1125442, EPI_ISL_1125508, EPI_ISL_1125592, EPI_ISL_1125655, EPI_ISL_1125668, EPI_ISL_1125722, EPI_ISL_1125772, EPI_ISL_1125775, EPI_ISL_1125827, EPI_ISL_1125847, EPI_ISL_1125877, EPI_ISL_1125920, EPI_ISL_1125956, EPI_ISL_1125997, EPI_ISL_1126022, EPI_ISL_1126023, EPI_ISL_1126063, EPI_ISL_1126077, EPI_ISL_1126104, EPI_ISL_1126200, EPI_ISL_1126223, EPI_ISL_1126350, EPI_ISL_1126352, EPI_ISL_1126376, EPI_ISL_1126382, EPI_ISL_1126406, EPI_ISL_1126427, EPI_ISL_1126435, EPI_ISL_1126480, EPI_ISL_1126495, EPI_ISL_1126572, EPI_ISL_1126626, EPI_ISL_1126644, EPI_ISL_1126645, EPI_ISL_1126666, EPI_ISL_1126691, EPI_ISL_1126732, EPI_ISL_1126778, EPI_ISL_1126820, EPI_ISL_1126892, EPI_ISL_1126983, EPI_ISL_1127000, EPI_ISL_1127016, EPI_ISL_1127019, EPI_ISL_1127072                                                                                                                                                                                                                                                                                                               |                                                                                                             |                                                                        |                                                                                  |
| see above                                                                                                                                                                                                                                                                                                                                                                                                                                                                                                                                                                                                                                                                                                                                                                                                                                                                                                                                                                                                                                                                                                                                                                                                                                                                           | Department of Virus and Microbiological Special Diagnostics,<br>Statens Serum Institut, Copenhagen, Denmark | Aalborg University                                                     | Danish Covid-19 Genome Consortium                                                |
| EPI_ISL_1127139, EPI_ISL_1127146, EPI_ISL_1127147, EPI_ISL_1127153, EPI_ISL_1127154, EPI_ISL_1127163, EPI_ISL_1127186, EPI_ISL_1127187, EPI_ISL_1127188, EPI_ISL_1127189, EPI_ISL_1127190, EPI_ISL_1127191, EPI_ISL_1127192, EPI_ISL_1127193, EPI_ISL_1127194, EPI_ISL_1127195, EPI_ISL_1127196, EPI_ISL_1127197, EPI_ISL_1127198, EPI_ISL_1127199, EPI_ISL_1127200, EPI_ISL_1127201, EPI_ISL_1127202, EPI_ISL_1127203, EPI_ISL_1127204, EPI_ISL_1127205, EPI_ISL_1127206, EPI_ISL_1127207, EPI_ISL_1127208, EPI_ISL_1127209, EPI_ISL_1127210, EPI_ISL_1127211, EPI_ISL_1127214, EPI_ISL_1127314, EPI_ISL_1127315, EPI_ISL_1127316, EPI_ISL_1127317, EPI_ISL_1127318, EPI_ISL_1127319, EPI_ISL_1127320, EPI_ISL_1127321, EPI_ISL_1127322, EPI_ISL_1127323, EPI_ISL_1127324, EPI_ISL_1127325, EPI_ISL_1127452, EPI_ISL_1127453, EPI_ISL_1127454, EPI_ISL_1127455, EPI_ISL_1127456, EPI_ISL_1127457, EPI_ISL_1127458, EPI_ISL_1127459, EPI_ISL_1127460, EPI_ISL_1127461, EPI_ISL_1127462, EPI_ISL_1127463, EPI_ISL_1127464, EPI_ISL_1127465, EPI_ISL_1127466, EPI_ISL_1127467, EPI_ISL_1127468, EPI_ISL_1127469, EPI_ISL_1127470, EPI_ISL_1127471, EPI_ISL_1127472, EPI_ISL_1127473, EPI_ISL_1127474, EPI_ISL_1127475, EPI_ISL_1127476, EPI_ISL_1127477, EPI_ISL_1127478, EPI_ISL_112 |                                                                                                             |                                                                        |                                                                                  |





|                                                                                                                                                                                                                                                                                                                                                                                                                                         |                                                                                            |                                                                                                                            |                                                                                                                                                                                                                                                                                                                                                                                                                                          |
|-----------------------------------------------------------------------------------------------------------------------------------------------------------------------------------------------------------------------------------------------------------------------------------------------------------------------------------------------------------------------------------------------------------------------------------------|--------------------------------------------------------------------------------------------|----------------------------------------------------------------------------------------------------------------------------|------------------------------------------------------------------------------------------------------------------------------------------------------------------------------------------------------------------------------------------------------------------------------------------------------------------------------------------------------------------------------------------------------------------------------------------|
|                                                                                                                                                                                                                                                                                                                                                                                                                                         |                                                                                            | Biochemistry and Molecular Biology                                                                                         | Omer Faruq, Md. Imranul Hoq, Robiul Hasan Bhuiyan                                                                                                                                                                                                                                                                                                                                                                                        |
| EPI_ISL_1135111                                                                                                                                                                                                                                                                                                                                                                                                                         | Arizona State Public Health Laboratory                                                     | Arizona State Public Health Laboratory                                                                                     | Trung Huynh, Jessica Escobar, Katherine Fullerton, Nobuko Fukushima, Stacy White, Linda Getsinger, Victor Waddell                                                                                                                                                                                                                                                                                                                        |
| EPI_ISL_1137005, EPI_ISL_1137010, EPI_ISL_1137027, EPI_ISL_1137028, EPI_ISL_1137029, EPI_ISL_1137035, EPI_ISL_1137036, EPI_ISL_1137037                                                                                                                                                                                                                                                                                                  | Delaware Public Health Lab                                                                 | Delaware Public Health Lab                                                                                                 | Gregory Hovan                                                                                                                                                                                                                                                                                                                                                                                                                            |
| EPI_ISL_1137073                                                                                                                                                                                                                                                                                                                                                                                                                         | Kansas Health and Environmental Lab                                                        | Kansas Health and Environmental Lab                                                                                        | Mike Grose, Jonathan Barnell, Ben Olsen, and Phil Adam                                                                                                                                                                                                                                                                                                                                                                                   |
| EPI_ISL_1137195, EPI_ISL_1137196, EPI_ISL_1137197, EPI_ISL_1137198, EPI_ISL_1137199, EPI_ISL_1137200, EPI_ISL_1137201, EPI_ISL_1137202, EPI_ISL_1137203, EPI_ISL_1137205, EPI_ISL_1137206, EPI_ISL_1137208                                                                                                                                                                                                                              |                                                                                            |                                                                                                                            |                                                                                                                                                                                                                                                                                                                                                                                                                                          |
| see above                                                                                                                                                                                                                                                                                                                                                                                                                               | UPMC Clinical Microbiology Laboratory                                                      | Microbial Genome Sequencing Center; Microbial Genomic Epidemiology Laboratory, University of Pittsburgh                    | Lee H. Harrison, Jane W. Marsh, Marissa P. Griffith, Stephanie L. Mitchell, Vatsala R. Srinivasa, Kady D. Waggle, Daniel J. Snyder, Vaughn S. Cooper                                                                                                                                                                                                                                                                                     |
| EPI_ISL_1137605, EPI_ISL_1137606, EPI_ISL_1137607                                                                                                                                                                                                                                                                                                                                                                                       | Wyoming Public Health Laboratory                                                           | Wyoming Public Health Laboratory                                                                                           | Jim Mildenerberger, Wanda Manley, Noah Hull, Taylor Fearing, Lynette Gumbleton, Channing Weber, Ashley Norberg, Chayse Rowley, Marley Goetz, Brian Dominguez, Elliot Thomasson, Cari Sloma, and Rob Christensen                                                                                                                                                                                                                          |
| EPI_ISL_1138411                                                                                                                                                                                                                                                                                                                                                                                                                         | Hospital HIA Percy, Medical Biology                                                        | National Reference Center for Viruses of Respiratory Infections, Institut Pasteur, Paris                                   | Marion Barbet, Sylvie Behillil, Méline Bizard, Angela Brisebarre, Camille Capel, Etienne Simon-Lorière, Vincent Enouf, Maud Vanpeene, Sylvie van der Werf, Vincent Foissaud                                                                                                                                                                                                                                                              |
| EPI_ISL_1138422                                                                                                                                                                                                                                                                                                                                                                                                                         | Laboratorio de Referencia Nacional de Virus Respiratorio. Instituto Nacional de Salud Perú | Laboratorio de Referencia Nacional de Biotecnología y Biología Molecular. Instituto Nacional de Salud Perú                 | Carlos Padilla Rojas, Karolyn Vega Chozo, Luis Barcena, Priscila Lope Parí, Omar Caceres Rey, Marco Galarza Perez, Maribel Huaranga Nuñez, Johanna Balbuena Torrez, Henri Bailon Calderon, Nancy Rojas Serrano                                                                                                                                                                                                                           |
| EPI_ISL_1138513, EPI_ISL_1138514, EPI_ISL_1138515                                                                                                                                                                                                                                                                                                                                                                                       | SA Pärnu Hospital Laboratory                                                               | 1. Laboratory of Communicable Diseases (Estonia); 2. Eurofins Genomics Europe Sequencing GmbH                              | Lidia Dotsenko                                                                                                                                                                                                                                                                                                                                                                                                                           |
| EPI_ISL_1138612, EPI_ISL_1138619, EPI_ISL_1138626, EPI_ISL_1138633, EPI_ISL_1138668, EPI_ISL_1138683, EPI_ISL_1138686, EPI_ISL_1138702, EPI_ISL_1138705, EPI_ISL_1138710, EPI_ISL_1138712, EPI_ISL_1138717, EPI_ISL_1138718, EPI_ISL_1138720                                                                                                                                                                                            |                                                                                            |                                                                                                                            |                                                                                                                                                                                                                                                                                                                                                                                                                                          |
| see above                                                                                                                                                                                                                                                                                                                                                                                                                               | Institut für Medizinische Virologie, Universitätsklinikum Frankfurt                        | Institut für Medizinische Virologie, Universitätsklinikum Frankfurt                                                        | Barbara Muehleemann et al                                                                                                                                                                                                                                                                                                                                                                                                                |
| EPI_ISL_1140394, EPI_ISL_1140395, EPI_ISL_1140396, EPI_ISL_1140400, EPI_ISL_1140403, EPI_ISL_1140406, EPI_ISL_1140410, EPI_ISL_1140412, EPI_ISL_1140413, EPI_ISL_1140459, EPI_ISL_1140460, EPI_ISL_1140464, EPI_ISL_1140467, EPI_ISL_1140468, EPI_ISL_1140469, EPI_ISL_1140472, EPI_ISL_1140473                                                                                                                                         |                                                                                            |                                                                                                                            |                                                                                                                                                                                                                                                                                                                                                                                                                                          |
| see above                                                                                                                                                                                                                                                                                                                                                                                                                               | Labor ZOTZ KLIMAS; MVZ Düsseldorf-Centrum                                                  | Robert Koch Institute                                                                                                      | unknown                                                                                                                                                                                                                                                                                                                                                                                                                                  |
| EPI_ISL_1143962, EPI_ISL_1143977                                                                                                                                                                                                                                                                                                                                                                                                        | Bayerisches Landesamt für Gesundheit und Lebensmittelsicherheit (LGL)                      | Robert Koch Institute                                                                                                      | unknown                                                                                                                                                                                                                                                                                                                                                                                                                                  |
| EPI_ISL_1144923, EPI_ISL_1144924, EPI_ISL_1144925, EPI_ISL_1144927, EPI_ISL_1144930, EPI_ISL_1144931, EPI_ISL_1144934, EPI_ISL_1144936, EPI_ISL_1144937                                                                                                                                                                                                                                                                                 | Medizinische Hochschule Hannover Institut für Virologie                                    | Robert Koch Institute                                                                                                      | unknown                                                                                                                                                                                                                                                                                                                                                                                                                                  |
| EPI_ISL_1147655                                                                                                                                                                                                                                                                                                                                                                                                                         | Uniklinikum Jena                                                                           | Robert Koch Institute                                                                                                      | unknown                                                                                                                                                                                                                                                                                                                                                                                                                                  |
| EPI_ISL_1157006, EPI_ISL_1157008, EPI_ISL_1157009, EPI_ISL_1157011, EPI_ISL_1157013, EPI_ISL_1157017, EPI_ISL_1157020, EPI_ISL_1157022, EPI_ISL_1157024, EPI_ISL_1157025, EPI_ISL_1157027, EPI_ISL_1157031, EPI_ISL_1157033                                                                                                                                                                                                             |                                                                                            |                                                                                                                            |                                                                                                                                                                                                                                                                                                                                                                                                                                          |
| see above                                                                                                                                                                                                                                                                                                                                                                                                                               | Virginia Division of Consolidated Laboratory Services                                      | Virginia Division of Consolidated Laboratory Services                                                                      | Virginia DCLS                                                                                                                                                                                                                                                                                                                                                                                                                            |
| EPI_ISL_1157071, EPI_ISL_1157072, EPI_ISL_1157073, EPI_ISL_1157074, EPI_ISL_1157075, EPI_ISL_1157076, EPI_ISL_1157077, EPI_ISL_1157079, EPI_ISL_1157080, EPI_ISL_1157081, EPI_ISL_1157083, EPI_ISL_1157085, EPI_ISL_1157086, EPI_ISL_1157087, EPI_ISL_1157088, EPI_ISL_1157089, EPI_ISL_1157092, EPI_ISL_1157093, EPI_ISL_1157094, EPI_ISL_1157097, EPI_ISL_1157098, EPI_ISL_1157099                                                    |                                                                                            |                                                                                                                            |                                                                                                                                                                                                                                                                                                                                                                                                                                          |
| see above                                                                                                                                                                                                                                                                                                                                                                                                                               | Eurofins LifeCodexx GmbH                                                                   | Robert Koch Institute                                                                                                      | unknown                                                                                                                                                                                                                                                                                                                                                                                                                                  |
| EPI_ISL_1159104, EPI_ISL_1159105                                                                                                                                                                                                                                                                                                                                                                                                        | Department of Health Technology and Informatics, The Hong Kong Polytechnic University      | Department of Health Technology and Informatics, The Hong Kong Polytechnic University                                      | Gilman Kit-Hang Siu, Lam-Kwong Lee, Kenneth Siu-Sing Leung, Jake Siu-Lun Leung, Timothy Ting-Leung Ng, Chloe Toi-Mei Chan, Kingsley King-Gee Tam, Hiu-Yin Lao, Denise Sze-Hang Wong, Alan Ka-Lun Wu, Miranda Chong-Yee Yau, Yvette Wai-Man Lai, Kitty Sau-Chun Fung, Sandy Ka-Yee Chau, Barry Kin-Chung Wong, Wing-Kin To, Kristine Luk, Alex Yat-Man Ho, Tak-Lun Que, Kam-Tong Yip, Wing Cheong Yam, David Ho-Keung Shum, Shea Ping Yip |
| EPI_ISL_1159778, EPI_ISL_1159792, EPI_ISL_1159804                                                                                                                                                                                                                                                                                                                                                                                       | Wisconsin State Laboratory of Hygiene Communicable Disease Division                        | Wisconsin State Laboratory of Hygiene Communicable Disease Division                                                        | Kelsey R. Florek, Abigail C. Shockey                                                                                                                                                                                                                                                                                                                                                                                                     |
| EPI_ISL_1163533, EPI_ISL_1163534, EPI_ISL_1163535, EPI_ISL_1163536, EPI_ISL_1163537, EPI_ISL_1163539, EPI_ISL_1163540, EPI_ISL_1163541, EPI_ISL_1163542, EPI_ISL_1163543, EPI_ISL_1163544, EPI_ISL_1163546, EPI_ISL_1163547, EPI_ISL_1163548, EPI_ISL_1163549                                                                                                                                                                           |                                                                                            |                                                                                                                            |                                                                                                                                                                                                                                                                                                                                                                                                                                          |
| see above                                                                                                                                                                                                                                                                                                                                                                                                                               | Maine HETL                                                                                 | Tewhey Lab, The Jackson Laboratory                                                                                         | Matluk,N., Dewey,H., Iosue,F., Barter,M., Lynch,R., Munger,H. and Tewhey,R.                                                                                                                                                                                                                                                                                                                                                              |
| EPI_ISL_1164699, EPI_ISL_1164700, EPI_ISL_1164701, EPI_ISL_1164702, EPI_ISL_1164703, EPI_ISL_1164704, EPI_ISL_1164705, EPI_ISL_1164706, EPI_ISL_1164707, EPI_ISL_1164708, EPI_ISL_1164709, EPI_ISL_1164710, EPI_ISL_1164711, EPI_ISL_1164712, EPI_ISL_1164713, EPI_ISL_1164716, EPI_ISL_1164717, EPI_ISL_1164718, EPI_ISL_1164719, EPI_ISL_1164720, EPI_ISL_1164722, EPI_ISL_1164724, EPI_ISL_1164725, EPI_ISL_1164726, EPI_ISL_1164727 |                                                                                            |                                                                                                                            |                                                                                                                                                                                                                                                                                                                                                                                                                                          |
| see above                                                                                                                                                                                                                                                                                                                                                                                                                               | Department of Molecular Virology, Cyprus Institute of Neurology and Genetics               | Department of Molecular Virology, Cyprus Institute of Neurology and Genetics                                               | Jan Richter, Pavlos Fanis, Christina Tryfonos, Dana Koptides, George Krashias, Stavros Bashiarides, Andreas Hadjisavvas, Maria Loizidou, Anastasis Oulas, Denise Alexandrou, Olga Kalakouta, Mihalís Panayiotidis, George Spyrou, Christina Christodoulou                                                                                                                                                                                |
| EPI_ISL_1164994                                                                                                                                                                                                                                                                                                                                                                                                                         | LACEN - Laboratório Central de Saúde Pública do Paraíba                                    | Evandro Chagas Institute                                                                                                   | Santos, M.C.; Silva, A.M.; Junior, W.D.C.; Barbagelata, L.S.; Ferreira, J.A.; Sousa, E.M.A.; da Silva, P.S.; Pinheiro, K.C.; L.C.; Sousa Junior, E.C.                                                                                                                                                                                                                                                                                    |
| EPI_ISL_1164995                                                                                                                                                                                                                                                                                                                                                                                                                         | LACEN - Laboratório Central de Saúde Pública do Ceará                                      | Evandro Chagas Institute                                                                                                   | Santos, M.C.; Silva, A.M.; Junior, W.D.C.; Barbagelata, L.S.; Ferreira, J.A.; Sousa, E.M.A.; da Silva, P.S.; Pinheiro, K.C.; L.C.; Sousa Junior, E.C.                                                                                                                                                                                                                                                                                    |
| EPI_ISL_1164996                                                                                                                                                                                                                                                                                                                                                                                                                         | LACEN - Laboratório Central de Saúde Pública do Maranhão                                   | Evandro Chagas Institute                                                                                                   | Santos, M.C.; Silva, A.M.; Junior, W.D.C.; Barbagelata, L.S.; Ferreira, J.A.; Sousa, E.M.A.; da Silva, P.S.; Pinheiro, K.C.; L.C.; Sousa Junior, E.C.                                                                                                                                                                                                                                                                                    |
| EPI_ISL_1164999                                                                                                                                                                                                                                                                                                                                                                                                                         | LACEN - Laboratório Central de Saúde Pública do Paraíba                                    | Evandro Chagas Institute                                                                                                   | Santos, M.C.; Silva, A.M.; Junior, W.D.C.; Barbagelata, L.S.; Ferreira, J.A.; Sousa, E.M.A.; da Silva, P.S.; Pinheiro, K.C.; L.C.; Sousa Junior, E.C.                                                                                                                                                                                                                                                                                    |
| EPI_ISL_1167135, EPI_ISL_1167141, EPI_ISL_1167145, EPI_ISL_1167146                                                                                                                                                                                                                                                                                                                                                                      | Iressef Genomics lab                                                                       | L'institut de Recherche en Santé, de Surveillance Épidémiologique et de Formation (IRESSEF)                                | Souleymane MBOUP, Abdou PADANE, Abdoulie KANTEH , Abdul Karim SESAY , Khadim GUEYE, Papa Alassane DIAW, Birahim Piere NDIAYE, Barada CISSE, Aminata MBOUP, Moustapha MBOW, Ndeye Coumba Toure KANE, Nafisatou LEYE, Gora LO, Ambroise AHOUIDI , Astou Gaye GAYE, Aminata DIA, Yacine DIA                                                                                                                                                 |
| EPI_ISL_1167703, EPI_ISL_1167753, EPI_ISL_1167756, EPI_ISL_1167790, EPI_ISL_1167796, EPI_ISL_1167810, EPI_ISL_1167829, EPI_ISL_1167847, EPI_ISL_1167863, EPI_ISL_1167866, EPI_ISL_1167877, EPI_ISL_1167878, EPI_ISL_1167879, EPI_ISL_1167885, EPI_ISL_1167887, EPI_ISL_1167924, EPI_ISL_1167928, EPI_ISL_1167930                                                                                                                        |                                                                                            |                                                                                                                            |                                                                                                                                                                                                                                                                                                                                                                                                                                          |
| see above                                                                                                                                                                                                                                                                                                                                                                                                                               | Genetica Molecular and Subdepartamento de Virologia ISP Chile                              | Instituto de Salud Publica de Chile                                                                                        | Javier Tognarelli, Karen Orostica, Barbara Parra, Loredana Arata, Jaime Lagos, Gisselle Barra, Patricia Bustos, Rodrigo Fasce, Andres Castillo, Jorge Fernandez                                                                                                                                                                                                                                                                          |
| EPI_ISL_1167940, EPI_ISL_1167941, EPI_ISL_1167944, EPI_ISL_1167947, EPI_ISL_1167948, EPI_ISL_1167950, EPI_ISL_1167952, EPI_ISL_1167953, EPI_ISL_1167954, EPI_ISL_1167957, EPI_ISL_1167959, EPI_ISL_1167962, EPI_ISL_1167966, EPI_ISL_1167971, EPI_ISL_1167972, EPI_ISL_1167974, EPI_ISL_1167977, EPI_ISL_1167980, EPI_ISL_1167982, EPI_ISL_1167985, EPI_ISL_1167987                                                                     |                                                                                            |                                                                                                                            |                                                                                                                                                                                                                                                                                                                                                                                                                                          |
| see above                                                                                                                                                                                                                                                                                                                                                                                                                               | GA Department of Public Health Laboratory                                                  | Genomics and Discovery, Respiratory Viruses Branch, Division of Viral Diseases, Centers for Disease Control and Prevention | Brian Lynch, Krista Queen, Yan Li, Ying Tao, Jing Zhang, Anna Uehara, Anna Montmayeur, Clinton R. Paden, Peter W. Cook, Rachel Marine, Haibin Wang,, Suxiang Tong                                                                                                                                                                                                                                                                        |
| EPI_ISL_1167990, EPI_ISL_1167991, EPI_ISL_1167993, EPI_ISL_1167996                                                                                                                                                                                                                                                                                                                                                                      | MO State Public Health Laboratory                                                          | Genomics and Discovery, Respiratory Viruses Branch, Division of Viral Diseases, Centers for Disease Control and Prevention | Brian Lynch, Krista Queen, Yan Li, Ying Tao, Jing Zhang, Anna Uehara, Anna Montmayeur, Clinton R. Paden, Peter W. Cook, Rachel Marine, Haibin Wang,, Suxiang Tong                                                                                                                                                                                                                                                                        |
| EPI_ISL_1168001, EPI_ISL_1168003, EPI_ISL_1168006                                                                                                                                                                                                                                                                                                                                                                                       | GA Department of Public Health Laboratory                                                  | Genomics and Discovery, Respiratory Viruses Branch, Division of Viral Diseases, Centers for Disease Control and            | Brian Lynch, Krista Queen, Yan Li, Ying Tao, Jing Zhang, Anna Uehara, Anna Montmayeur, Clinton R. Paden, Peter W. Cook, Rachel Marine, Haibin Wang,, Suxiang Tong                                                                                                                                                                                                                                                                        |

|                                                                                                                                                                                                                                                                                                                                                                                                                                                                                                                                                                                                                                                                                                                                                                                                                                                                                                                                                                                                                                                                                                                                                                                                                                                                                                                                                                                                                                                                                                                                                                                                                                             |                                                                                                                                                                                                 |                                                                                                                                  |                                                                                                                                                                                                                                                                                                                                                                                                                                                                                                                                                                                                          |
|---------------------------------------------------------------------------------------------------------------------------------------------------------------------------------------------------------------------------------------------------------------------------------------------------------------------------------------------------------------------------------------------------------------------------------------------------------------------------------------------------------------------------------------------------------------------------------------------------------------------------------------------------------------------------------------------------------------------------------------------------------------------------------------------------------------------------------------------------------------------------------------------------------------------------------------------------------------------------------------------------------------------------------------------------------------------------------------------------------------------------------------------------------------------------------------------------------------------------------------------------------------------------------------------------------------------------------------------------------------------------------------------------------------------------------------------------------------------------------------------------------------------------------------------------------------------------------------------------------------------------------------------|-------------------------------------------------------------------------------------------------------------------------------------------------------------------------------------------------|----------------------------------------------------------------------------------------------------------------------------------|----------------------------------------------------------------------------------------------------------------------------------------------------------------------------------------------------------------------------------------------------------------------------------------------------------------------------------------------------------------------------------------------------------------------------------------------------------------------------------------------------------------------------------------------------------------------------------------------------------|
| EPI_ISL_1168007, EPI_ISL_1168014                                                                                                                                                                                                                                                                                                                                                                                                                                                                                                                                                                                                                                                                                                                                                                                                                                                                                                                                                                                                                                                                                                                                                                                                                                                                                                                                                                                                                                                                                                                                                                                                            | MO State Public Health Laboratory                                                                                                                                                               | Genomics and Discovery, Respiratory Viruses Branch,<br>Division of Viral Diseases, Centers for Disease Control and<br>Prevention | Brian Lynch, Krista Queen, Yan Li, Ying Tao, Jing Zhang, Anna Uehara, Anna Montmayeur, Clinton R. Paden, Peter W. Cook, Rachel Marine, Haibin Wang,, Suxiang Tong                                                                                                                                                                                                                                                                                                                                                                                                                                        |
| EPI_ISL_1168449                                                                                                                                                                                                                                                                                                                                                                                                                                                                                                                                                                                                                                                                                                                                                                                                                                                                                                                                                                                                                                                                                                                                                                                                                                                                                                                                                                                                                                                                                                                                                                                                                             | DC Public Health Lab/ Dept. of Forensic Sciences                                                                                                                                                | DC Public Health Lab/ Dept. of Forensic Sciences                                                                                 | Scott Nguyen, Janis Doss, Elizabeth Zelaya, Sarah Scott, Connie Maza, Monica Mann, Brittany Hamilton, David Payne, Jocelyn Hauser                                                                                                                                                                                                                                                                                                                                                                                                                                                                        |
| EPI_ISL_1168658, EPI_ISL_1168659,<br>EPI_ISL_1168666, EPI_ISL_1168672,<br>EPI_ISL_1168675                                                                                                                                                                                                                                                                                                                                                                                                                                                                                                                                                                                                                                                                                                                                                                                                                                                                                                                                                                                                                                                                                                                                                                                                                                                                                                                                                                                                                                                                                                                                                   | Centers for Disease Control and Prevention, Dengue Branch                                                                                                                                       | Centers for Disease Control and Prevention, Dengue Branch                                                                        | Gilberto A. Santiago, Glenda Gonzalez, Betzabel Flores, Keyla Charriez, Gabriela Paz-Bailey, Jorge L. Munoz-Jordan                                                                                                                                                                                                                                                                                                                                                                                                                                                                                       |
| EPI_ISL_1168770, EPI_ISL_1168771                                                                                                                                                                                                                                                                                                                                                                                                                                                                                                                                                                                                                                                                                                                                                                                                                                                                                                                                                                                                                                                                                                                                                                                                                                                                                                                                                                                                                                                                                                                                                                                                            | Beijing Center for Disease Prevention and Control                                                                                                                                               | Beijing Center for Disease Prevention and Control                                                                                | Yang Pan, Fu Li, Zhaomin Feng, Shujuan Cui, Bing Lyu, Zhichao Liang, Lijuan Chen, Daitao Zhang, Quanyi Wang                                                                                                                                                                                                                                                                                                                                                                                                                                                                                              |
| EPI_ISL_1168773, EPI_ISL_1168774, EPI_ISL_1168778, EPI_ISL_1168779, EPI_ISL_1168780, EPI_ISL_1168781, EPI_ISL_1168782, EPI_ISL_1168783, EPI_ISL_1168784, EPI_ISL_1168785, EPI_ISL_1168786, EPI_ISL_1168787, EPI_ISL_1168788, EPI_ISL_1168789, EPI_ISL_1168790, EPI_ISL_1168791, EPI_ISL_1168792, EPI_ISL_1168800, EPI_ISL_1168801, EPI_ISL_1168802, EPI_ISL_1168803, EPI_ISL_1168804, EPI_ISL_1168805, EPI_ISL_1168806, EPI_ISL_1168807, EPI_ISL_1168808, EPI_ISL_1168809, EPI_ISL_1168810, EPI_ISL_1168811, EPI_ISL_1168812, EPI_ISL_1168813, EPI_ISL_1168814, EPI_ISL_1168815, EPI_ISL_1168816, EPI_ISL_1168817, EPI_ISL_1168818, EPI_ISL_1168819, EPI_ISL_1168820, EPI_ISL_1168821, EPI_ISL_1168822, EPI_ISL_1168823, EPI_ISL_1168824, EPI_ISL_1168825, EPI_ISL_1168826, EPI_ISL_1168827, EPI_ISL_1168828, EPI_ISL_1168829, EPI_ISL_1168830, EPI_ISL_1168831, EPI_ISL_1168832, EPI_ISL_1168833, EPI_ISL_1168834, EPI_ISL_1168835, EPI_ISL_1168836, EPI_ISL_1168837, EPI_ISL_1168838, EPI_ISL_1168839, EPI_ISL_1168840, EPI_ISL_1168841, EPI_ISL_1168842, EPI_ISL_1168845, EPI_ISL_1168847, EPI_ISL_1168848, EPI_ISL_1168849, EPI_ISL_1168850, EPI_ISL_1168851, EPI_ISL_1168852, EPI_ISL_1168853, EPI_ISL_1168854, EPI_ISL_1168858, EPI_ISL_1168859, EPI_ISL_1168860, EPI_ISL_1168861, EPI_ISL_1168862, EPI_ISL_1168863, EPI_ISL_1168864, EPI_ISL_1168865, EPI_ISL_1168867, EPI_ISL_1168868, EPI_ISL_1168869, EPI_ISL_1168870, EPI_ISL_1168871, EPI_ISL_1168872, EPI_ISL_1168873, EPI_ISL_1168874, EPI_ISL_1168875, EPI_ISL_1168880, EPI_ISL_1168883, EPI_ISL_1168897, EPI_ISL_1168898, EPI_ISL_1168899, EPI_ISL_1168900, EPI_ISL_1168901 |                                                                                                                                                                                                 |                                                                                                                                  |                                                                                                                                                                                                                                                                                                                                                                                                                                                                                                                                                                                                          |
| see above                                                                                                                                                                                                                                                                                                                                                                                                                                                                                                                                                                                                                                                                                                                                                                                                                                                                                                                                                                                                                                                                                                                                                                                                                                                                                                                                                                                                                                                                                                                                                                                                                                   | Department of Infectious Diseases, Kobe Institute of Health                                                                                                                                     | Department of Infectious Diseases, Kobe Institute of Health                                                                      | Ryohei Nomoto, Noriko Nakanishi, Tomotada Iwamoto, Tsuyoshi Sekizuka, Kentaro Itokawa, Rina Tanaka, Masanori Hashino, Makoto Kuroda                                                                                                                                                                                                                                                                                                                                                                                                                                                                      |
| EPI_ISL_1169499                                                                                                                                                                                                                                                                                                                                                                                                                                                                                                                                                                                                                                                                                                                                                                                                                                                                                                                                                                                                                                                                                                                                                                                                                                                                                                                                                                                                                                                                                                                                                                                                                             | Commonwealth Healthcare Center                                                                                                                                                                  | Genomics and Discovery, Respiratory Viruses Branch,<br>Division of Viral Diseases, Centers for Disease Control and<br>Prevention | Krista Queen, Yan Li, Ying Tao, Jing Zhang, Anna Uehara, Anna Montmayeur, Clinton R. Paden, Peter W. Cook, Rachel Marine, Mili Sheth, Jasmine Padilla, Sarah Nobles, Mark Burroughs, Lori Rowe, Haibin Wang, Ben L. Rambo-Martin, Dhvani Batra, Justin Lee, Suxiang Tong                                                                                                                                                                                                                                                                                                                                 |
| EPI_ISL_1171128, EPI_ISL_1171310                                                                                                                                                                                                                                                                                                                                                                                                                                                                                                                                                                                                                                                                                                                                                                                                                                                                                                                                                                                                                                                                                                                                                                                                                                                                                                                                                                                                                                                                                                                                                                                                            | OHSU Lab Services Molecular Microbiology Lab                                                                                                                                                    | Ginkgo Bioworks Clinical Laboratory                                                                                              | Brendan L. O'Connell, Sally Grindstaff, Kayla Carter, Ruth V. Nichols, Malaika Mckenzie-Bennett, James McGann, Jim Griffin, Keith Robison, Alex Plocik, Becky Schilling, Martha Pierson, Rebecca Littlefield, Michelle Spencer, Amanda Riccardi, Birgitte Simen, Alec J. Hirsch, Donna Hansel, Guang Fan, Xuan Qin, Daniel N. Streblow, William B. Messer, Andrew C. Adey, Benjamin N. Bimber, Brian J. O'Roak                                                                                                                                                                                           |
| EPI_ISL_1171744, EPI_ISL_1171750                                                                                                                                                                                                                                                                                                                                                                                                                                                                                                                                                                                                                                                                                                                                                                                                                                                                                                                                                                                                                                                                                                                                                                                                                                                                                                                                                                                                                                                                                                                                                                                                            | Wyoming Public Health Laboratory                                                                                                                                                                | Wyoming Public Health Laboratory                                                                                                 | Jim Mildenerberger, Wanda Manley, Noah Hull, Taylor Fearing, Lynette Gumbleton, Channing Weber, Ashley Norberg, Chayse Rowley, Marley Goetz, Brian Dominguez, Elliot Thomasson, Cari Sloma, and Rob Christensen                                                                                                                                                                                                                                                                                                                                                                                          |
| EPI_ISL_538498                                                                                                                                                                                                                                                                                                                                                                                                                                                                                                                                                                                                                                                                                                                                                                                                                                                                                                                                                                                                                                                                                                                                                                                                                                                                                                                                                                                                                                                                                                                                                                                                                              | RSUD Soediono Madiun East Java                                                                                                                                                                  | National Institute of Health Research and Development                                                                            | Pawestri, HA; Subangkit; Puspa, KD; Nugraha, AA; Ikawati, HD; Pangesti, KNA; Soekarso, T; Paisal; Setiawaty,V.                                                                                                                                                                                                                                                                                                                                                                                                                                                                                           |
| EPI_ISL_538503                                                                                                                                                                                                                                                                                                                                                                                                                                                                                                                                                                                                                                                                                                                                                                                                                                                                                                                                                                                                                                                                                                                                                                                                                                                                                                                                                                                                                                                                                                                                                                                                                              | RSUD Bali Mandara Denpasar Bali                                                                                                                                                                 | National Institute of Health Research and Development                                                                            | Pawestri, HA; Subangkit; Puspa, KD; Nugraha, AA; Ikawati, HD; Pangesti, KNA; Soekarso, T; Paisal; Setiawaty,V.                                                                                                                                                                                                                                                                                                                                                                                                                                                                                           |
| EPI_ISL_538511                                                                                                                                                                                                                                                                                                                                                                                                                                                                                                                                                                                                                                                                                                                                                                                                                                                                                                                                                                                                                                                                                                                                                                                                                                                                                                                                                                                                                                                                                                                                                                                                                              | RSUD Wahidin Sudirohusodo Mojokerto East Java                                                                                                                                                   | National Institute of Health Research and Development                                                                            | Pawestri, HA; Subangkit; Puspa, KD; Nugraha, AA; Ikawati, HD; Pangesti, KNA; Soekarso, T; Paisal; Setiawaty,V.                                                                                                                                                                                                                                                                                                                                                                                                                                                                                           |
| EPI_ISL_538513                                                                                                                                                                                                                                                                                                                                                                                                                                                                                                                                                                                                                                                                                                                                                                                                                                                                                                                                                                                                                                                                                                                                                                                                                                                                                                                                                                                                                                                                                                                                                                                                                              | Provincial Health Laboratory Bekasi West Java                                                                                                                                                   | National Institute of Health Research and Development                                                                            | Pawestri, HA; Subangkit; Puspa, KD; Nugraha, AA; Ikawati, HD; Pangesti, KNA; Soekarso, T; Paisal; Setiawaty,V.                                                                                                                                                                                                                                                                                                                                                                                                                                                                                           |
| EPI_ISL_700688, EPI_ISL_700689,<br>EPI_ISL_700698                                                                                                                                                                                                                                                                                                                                                                                                                                                                                                                                                                                                                                                                                                                                                                                                                                                                                                                                                                                                                                                                                                                                                                                                                                                                                                                                                                                                                                                                                                                                                                                           | Respiratory Virus Unit, National Infection Service, Public Health England                                                                                                                       | COVID-19 Genomics UK (COG-UK) Consortium                                                                                         | PHE Covid Sequencing Team                                                                                                                                                                                                                                                                                                                                                                                                                                                                                                                                                                                |
| EPI_ISL_704609                                                                                                                                                                                                                                                                                                                                                                                                                                                                                                                                                                                                                                                                                                                                                                                                                                                                                                                                                                                                                                                                                                                                                                                                                                                                                                                                                                                                                                                                                                                                                                                                                              | Quadram Institute Bioscience                                                                                                                                                                    | COVID-19 Genomics UK (COG-UK) Consortium                                                                                         | Dave J. Baker, Gemma L. Kay, Alp Aydin, Thanh Le-Viet, Steven Rudder, Ana P. Tedim, Anastasia Kolyva, Maria Diaz, Leonardo de Oliveira Martins, Nabil-Fareed Alikhan, Lizzie Meadows, Rachael Stanley, Ngozi Elumogo, Muhammed Yasir, Nicholas M. Thomson, Alexander J Trotter, Rachel Gilroy, Samuel Bloomfield, Claire Stuart, Andrew Bell, Reenesh Prakash, Samir Dervisevic, Alison E. Mather, John Wain, Mark Webber, Andrew J. Page, Justin O'Grady                                                                                                                                                |
| EPI_ISL_704674                                                                                                                                                                                                                                                                                                                                                                                                                                                                                                                                                                                                                                                                                                                                                                                                                                                                                                                                                                                                                                                                                                                                                                                                                                                                                                                                                                                                                                                                                                                                                                                                                              | University College London Hospital                                                                                                                                                              | COVID-19 Genomics UK (COG-UK) Consortium                                                                                         | Judith Heaney, Matthew Byott, Catherine Houlihan, Dan Frampton, Stuart Kirk, Moira Spyer and Eleni Nastouli                                                                                                                                                                                                                                                                                                                                                                                                                                                                                              |
| EPI_ISL_704728, EPI_ISL_704736,<br>EPI_ISL_704744, EPI_ISL_704746                                                                                                                                                                                                                                                                                                                                                                                                                                                                                                                                                                                                                                                                                                                                                                                                                                                                                                                                                                                                                                                                                                                                                                                                                                                                                                                                                                                                                                                                                                                                                                           | Quadram Institute Bioscience                                                                                                                                                                    | COVID-19 Genomics UK (COG-UK) Consortium                                                                                         | Dave J. Baker, Gemma L. Kay, Alp Aydin, Thanh Le-Viet, Steven Rudder, Ana P. Tedim, Anastasia Kolyva, Maria Diaz, Leonardo de Oliveira Martins, Nabil-Fareed Alikhan, Lizzie Meadows, Rachael Stanley, Ngozi Elumogo, Muhammed Yasir, Nicholas M. Thomson, Alexander J Trotter, Rachel Gilroy, Samuel Bloomfield, Claire Stuart, Andrew Bell, Reenesh Prakash, Samir Dervisevic, Alison E. Mather, John Wain, Mark Webber, Andrew J. Page, Justin O'Grady                                                                                                                                                |
| EPI_ISL_705732                                                                                                                                                                                                                                                                                                                                                                                                                                                                                                                                                                                                                                                                                                                                                                                                                                                                                                                                                                                                                                                                                                                                                                                                                                                                                                                                                                                                                                                                                                                                                                                                                              | West of Scotland Specialist Virology Centre, NHSGGC / MRC-University of Glasgow Centre for Virus Research                                                                                       | COVID-19 Genomics UK (COG-UK) Consortium                                                                                         | Ana da Silva Filipe, Natasha Johnson, Kathy Smollett, Daniel Mair, Stephen Carmichael, Alice Broos, Lily Tong, Jenna Nichols, Kyriaki Nomikou; Sarah McDonald; Richard Orton, Joseph Hughes, Sreenu Vattipally, David L Robertson; Alasdair MacLean, Rory Gunson; Sharif Shaaban, Matthew Holden; Rachel Blacow, Guy Mollett, Kathy Li, James Shepherd, Antonia Ho, Emma Thomson                                                                                                                                                                                                                         |
| EPI_ISL_705783, EPI_ISL_705786,<br>EPI_ISL_705787, EPI_ISL_705788,<br>EPI_ISL_705789, EPI_ISL_705790,<br>EPI_ISL_705791, EPI_ISL_705792,<br>EPI_ISL_705793                                                                                                                                                                                                                                                                                                                                                                                                                                                                                                                                                                                                                                                                                                                                                                                                                                                                                                                                                                                                                                                                                                                                                                                                                                                                                                                                                                                                                                                                                  | Virology Department, Royal Infirmary of Edinburgh, NHS Lothian / School of Biological Sciences, University of Edinburgh / Institute of Genetics and Molecular Medicine, University of Edinburgh | COVID-19 Genomics UK (COG-UK) Consortium                                                                                         | McHugh M, Dewar R, Rooke S, Gallagher M, Balcaza C, O'Toole Á, Scher E, Hill V, McCrone JT, Colquhoun R, Yu X, Jackson B, Rambaut A, Williams TC, Templeton K                                                                                                                                                                                                                                                                                                                                                                                                                                            |
| EPI_ISL_705958                                                                                                                                                                                                                                                                                                                                                                                                                                                                                                                                                                                                                                                                                                                                                                                                                                                                                                                                                                                                                                                                                                                                                                                                                                                                                                                                                                                                                                                                                                                                                                                                                              | University College London Hospital                                                                                                                                                              | COVID-19 Genomics UK (COG-UK) Consortium                                                                                         | Judith Heaney, Matthew Byott, Catherine Houlihan, Dan Frampton, Stuart Kirk, Moira Spyer and Eleni Nastouli                                                                                                                                                                                                                                                                                                                                                                                                                                                                                              |
| EPI_ISL_706380, EPI_ISL_706382                                                                                                                                                                                                                                                                                                                                                                                                                                                                                                                                                                                                                                                                                                                                                                                                                                                                                                                                                                                                                                                                                                                                                                                                                                                                                                                                                                                                                                                                                                                                                                                                              | Quadram Institute Bioscience                                                                                                                                                                    | COVID-19 Genomics UK (COG-UK) Consortium                                                                                         | Dave J. Baker, Gemma L. Kay, Alp Aydin, Thanh Le-Viet, Steven Rudder, Ana P. Tedim, Anastasia Kolyva, Maria Diaz, Leonardo de Oliveira Martins, Nabil-Fareed Alikhan, Lizzie Meadows, Rachael Stanley, Ngozi Elumogo, Muhammed Yasir, Nicholas M. Thomson, Alexander J Trotter, Rachel Gilroy, Samuel Bloomfield, Claire Stuart, Andrew Bell, Reenesh Prakash, Samir Dervisevic, Alison E. Mather, John Wain, Mark Webber, Andrew J. Page, Justin O'Grady                                                                                                                                                |
| EPI_ISL_706977, EPI_ISL_706979,<br>EPI_ISL_706980, EPI_ISL_706981,<br>EPI_ISL_706982                                                                                                                                                                                                                                                                                                                                                                                                                                                                                                                                                                                                                                                                                                                                                                                                                                                                                                                                                                                                                                                                                                                                                                                                                                                                                                                                                                                                                                                                                                                                                        | Virology Department, Sheffield Teaching Hospitals NHS Foundation Trust/Department of Infection, Immunity and Cardiovascular Disease, The Medical School, University of Sheffield                | COVID-19 Genomics UK (COG-UK) Consortium                                                                                         | Thushan de Silva, Matthew Parker, Nikki Smith, Adri Angyal, Rebecca Brown, Luke Green, Rachel Tucker, Paul Parsons, Danielle Groves, Katie Johnson, Laura Carrilero, Alex Keeley, Dave Partridge, Matthew Wyles, Benjamin Lindsey, Mehmet Yavuz, Mohammad Raza, Cariad Evans                                                                                                                                                                                                                                                                                                                             |
| EPI_ISL_707795, EPI_ISL_707797,<br>EPI_ISL_707800, EPI_ISL_707804                                                                                                                                                                                                                                                                                                                                                                                                                                                                                                                                                                                                                                                                                                                                                                                                                                                                                                                                                                                                                                                                                                                                                                                                                                                                                                                                                                                                                                                                                                                                                                           | LabPLUS                                                                                                                                                                                         | Institute of Environmental Science and Research (ESR)                                                                            | Xiaoyun Ren, Matt Storey, Nikki Freed, Muhammad Faisal, Jing Wang, Hermes Perez, Anja Werno, Antje van der Linden, Arlo Upton, Chris Mansell, David Hammer, Dragana Drinkovic, Gary McAuliffe, Hana Sofia Andersson, James Ussher, Jill Sherwood, Josh Freeman, Julia Howard, Juliet Elvy, Mary DeAlmeida, Matt Blakiston, Matthew Rogers, Max Bloomfield, Michael Addidle, Michelle Balm, Sally Roberts, Sarah Jefferies, Sharmini Muttaiyah, Susan Morpeth, Susan Taylor, Timothy Blackmore, Vani Sathyendran, Veronica Playle, Virginia Hope, Erasmus Smit, Lauren Jelly, Olin Silander, Joep de Ligt |
| EPI_ISL_707806                                                                                                                                                                                                                                                                                                                                                                                                                                                                                                                                                                                                                                                                                                                                                                                                                                                                                                                                                                                                                                                                                                                                                                                                                                                                                                                                                                                                                                                                                                                                                                                                                              | Middlemore Hospital                                                                                                                                                                             | Institute of Environmental Science and Research (ESR)                                                                            | Xiaoyun Ren, Matt Storey, Nikki Freed, Muhammad Faisal, Jing Wang, Hermes Perez, Anja Werno, Antje van der Linden, Arlo Upton, Chris Mansell, David Hammer, Dragana Drinkovic, Gary McAuliffe, Hana Sofia Andersson, James Ussher, Jill Sherwood, Josh Freeman, Julia Howard, Juliet Elvy, Mary DeAlmeida, Matt Blakiston, Matthew Rogers, Max Bloomfield, Michael Addidle, Michelle Balm, Sally Roberts, Sarah Jefferies, Sharmini Muttaiyah, Susan Morpeth, Susan Taylor, Timothy Blackmore, Vani Sathyendran, Veronica Playle, Virginia Hope, Erasmus Smit, Lauren Jelly, Olin Silander, Joep de Ligt |
| EPI_ISL_708496, EPI_ISL_708497,<br>EPI_ISL_708498, EPI_ISL_708499,<br>EPI_ISL_708500, EPI_ISL_708501,<br>EPI_ISL_708502, EPI_ISL_708503                                                                                                                                                                                                                                                                                                                                                                                                                                                                                                                                                                                                                                                                                                                                                                                                                                                                                                                                                                                                                                                                                                                                                                                                                                                                                                                                                                                                                                                                                                     | Minnesota Department of Health, Public Health Laboratory                                                                                                                                        | Minnesota Department of Health, Public Health Laboratory                                                                         | Alexandra Lorentz, Jacob Garfin, Matt Plumb, and Xiong Wang                                                                                                                                                                                                                                                                                                                                                                                                                                                                                                                                              |
| EPI_ISL_708841, EPI_ISL_708845,<br>EPI_ISL_708846, EPI_ISL_708851,<br>EPI_ISL_708852, EPI_ISL_708853,<br>EPI_ISL_708854                                                                                                                                                                                                                                                                                                                                                                                                                                                                                                                                                                                                                                                                                                                                                                                                                                                                                                                                                                                                                                                                                                                                                                                                                                                                                                                                                                                                                                                                                                                     | Lighthouse Lab in Alderley Park                                                                                                                                                                 | Wellcome Sanger Institute for the COVID-19 Genomics UK (COG-UK) Consortium                                                       | Jacquelyn Wynn, Mairead Hyland, The Lighthouse Lab in Alderley Park and Alex Alderton, Roberto Amato, Sonia Goncalves, Ewan Harrison, David K. Jackson, Ian Johnston, Dominic Kwiatkowski, Cordelia Langford, John Sillitoe on behalf of the Wellcome Sanger Institute COVID-19 Surveillance Team                                                                                                                                                                                                                                                                                                        |
| EPI_ISL_708855                                                                                                                                                                                                                                                                                                                                                                                                                                                                                                                                                                                                                                                                                                                                                                                                                                                                                                                                                                                                                                                                                                                                                                                                                                                                                                                                                                                                                                                                                                                                                                                                                              | Lighthouse Lab in Glasgow                                                                                                                                                                       | Wellcome Sanger Institute for the COVID-19 Genomics UK (COG-UK) Consortium                                                       | Harper VanSteenhouse, Yumi Kasai, David Gray, Carol Clugston, Anna Dominiczak and Alex Alderton, Roberto Amato, Sonia Goncalves, Ewan Harrison, David K. Jackson, Ian Johnston, Dominic Kwiatkowski, Cordelia Langford, John Sillitoe on behalf of the Wellcome Sanger Institute COVID-19 Surveillance Team                                                                                                                                                                                                                                                                                              |



[illegible]

[illegible]

[illegible]

[illegible]

[illegible]

[illegible]

| Team                                                                           |                                                                                                     |                                                                                                     |
|--------------------------------------------------------------------------------|-----------------------------------------------------------------------------------------------------|-----------------------------------------------------------------------------------------------------|
| EPI_ISL_709563, EPI_ISL_709564                                                 | Lighthouse Lab in Alderley Park                                                                     | Wellcome Sanger Institute for the COVID-19 Genomics UK (COG-UK) Consortium                          |
| EPI_ISL_709565                                                                 | Lighthouse Lab in Glasgow                                                                           | Wellcome Sanger Institute for the COVID-19 Genomics UK (COG-UK) Consortium                          |
| EPI_ISL_710513                                                                 | Area of Virology, Serology and Virology Division (SAViD), New South Wales Health Pathology Randwick | Area of Virology, Serology and Virology Division (SAViD), New South Wales Health Pathology Randwick |
| EPI_ISL_710591                                                                 | Narhalsan Fjällbacka VC                                                                             | The Public Health Agency of Sweden                                                                  |
| EPI_ISL_710603                                                                 | Klinisk mikrobiologi                                                                                | The Public Health Agency of Sweden                                                                  |
| EPI_ISL_710614, EPI_ISL_710617                                                 | Lighthouse Lab in Alderley Park                                                                     | Wellcome Sanger Institute for the COVID-19 Genomics UK (COG-UK) Consortium                          |
| EPI_ISL_710619                                                                 | Lighthouse Lab in Glasgow                                                                           | Wellcome Sanger Institute for the COVID-19 Genomics UK (COG-UK) Consortium                          |
| EPI_ISL_710620                                                                 | Lighthouse Lab in Alderley Park                                                                     | Wellcome Sanger Institute for the COVID-19 Genomics UK (COG-UK) Consortium                          |
| EPI_ISL_710621, EPI_ISL_710622, EPI_ISL_710627                                 | Lighthouse Lab in Glasgow                                                                           | Wellcome Sanger Institute for the COVID-19 Genomics UK (COG-UK) Consortium                          |
| EPI_ISL_710628                                                                 | Lighthouse Lab in Alderley Park                                                                     | Wellcome Sanger Institute for the COVID-19 Genomics UK (COG-UK) Consortium                          |
| EPI_ISL_710629, EPI_ISL_710633, EPI_ISL_710635, EPI_ISL_710637                 | Lighthouse Lab in Glasgow                                                                           | Wellcome Sanger Institute for the COVID-19 Genomics UK (COG-UK) Consortium                          |
| EPI_ISL_710638                                                                 | Lighthouse Lab in Alderley Park                                                                     | Wellcome Sanger Institute for the COVID-19 Genomics UK (COG-UK) Consortium                          |
| EPI_ISL_710640, EPI_ISL_710641, EPI_ISL_710642, EPI_ISL_710643                 | Lighthouse Lab in Glasgow                                                                           | Wellcome Sanger Institute for the COVID-19 Genomics UK (COG-UK) Consortium                          |
| EPI_ISL_710645                                                                 | Lighthouse Lab in Alderley Park                                                                     | Wellcome Sanger Institute for the COVID-19 Genomics UK (COG-UK) Consortium                          |
| EPI_ISL_710646, EPI_ISL_710651, EPI_ISL_710654, EPI_ISL_710655                 | Lighthouse Lab in Glasgow                                                                           | Wellcome Sanger Institute for the COVID-19 Genomics UK (COG-UK) Consortium                          |
| EPI_ISL_710656                                                                 | Lighthouse Lab in Alderley Park                                                                     | Wellcome Sanger Institute for the COVID-19 Genomics UK (COG-UK) Consortium                          |
| EPI_ISL_710657, EPI_ISL_710658, EPI_ISL_710659, EPI_ISL_710660                 | Lighthouse Lab in Glasgow                                                                           | Wellcome Sanger Institute for the COVID-19 Genomics UK (COG-UK) Consortium                          |
| EPI_ISL_710661                                                                 | Lighthouse Lab in Alderley Park                                                                     | Wellcome Sanger Institute for the COVID-19 Genomics UK (COG-UK) Consortium                          |
| EPI_ISL_710664                                                                 | Lighthouse Lab in Glasgow                                                                           | Wellcome Sanger Institute for the COVID-19 Genomics UK (COG-UK) Consortium                          |
| EPI_ISL_710665                                                                 | Lighthouse Lab in Alderley Park                                                                     | Wellcome Sanger Institute for the COVID-19 Genomics UK (COG-UK) Consortium                          |
| EPI_ISL_710666, EPI_ISL_710667, EPI_ISL_710668, EPI_ISL_710670                 | Lighthouse Lab in Glasgow                                                                           | Wellcome Sanger Institute for the COVID-19 Genomics UK (COG-UK) Consortium                          |
| EPI_ISL_710671                                                                 | Lighthouse Lab in Alderley Park                                                                     | Wellcome Sanger Institute for the COVID-19 Genomics UK (COG-UK) Consortium                          |
| EPI_ISL_710672, EPI_ISL_710673, EPI_ISL_710675                                 | Lighthouse Lab in Glasgow                                                                           | Wellcome Sanger Institute for the COVID-19 Genomics UK (COG-UK) Consortium                          |
| EPI_ISL_710676                                                                 | Lighthouse Lab in Alderley Park                                                                     | Wellcome Sanger Institute for the COVID-19 Genomics UK (COG-UK) Consortium                          |
| EPI_ISL_710677, EPI_ISL_710679, EPI_ISL_710684, EPI_ISL_710685, EPI_ISL_710686 | Lighthouse Lab in Glasgow                                                                           | Wellcome Sanger Institute for the COVID-19 Genomics UK (COG-UK) Consortium                          |
| EPI_ISL_710689                                                                 | Lighthouse Lab in Alderley Park                                                                     | Wellcome Sanger Institute for the COVID-19 Genomics UK (COG-UK) Consortium                          |
| EPI_ISL_710690, EPI_ISL_710691                                                 | Lighthouse Lab in Glasgow                                                                           | Wellcome Sanger Institute for the COVID-19 Genomics UK (COG-UK) Consortium                          |
| EPI_ISL_710693                                                                 | Lighthouse Lab in Alderley Park                                                                     | Wellcome Sanger Institute for the COVID-19 Genomics UK (COG-UK) Consortium                          |
| EPI_ISL_710697                                                                 | Lighthouse Lab in Glasgow                                                                           | Wellcome Sanger Institute for the COVID-19 Genomics UK (COG-UK) Consortium                          |
| EPI_ISL_710698                                                                 | Lighthouse Lab in Alderley Park                                                                     | Wellcome Sanger Institute for the COVID-19 Genomics UK (COG-UK) Consortium                          |

|                                                                                                                                                                                                                                                                                                                                                                                                                                                                                                                                                                                                                                                                                                                                                                                                                                                                                                                                                                                                                                                                                                                                                                                                                                                                                                                                                                                                                                                                                                                                                                                                                                                                                                                                                                                                                                                                                                                                                                                                                                                                                                                                                                                                                                                                                                                                                                                                                                                                                                                                                                                                                                                                                                                                                                                                                                                                                                                                                                                                                                                                                |           |                                                                                                                                |                                                                                                                                   |                                                                                                                                                                                                                                                                                                                                                           |
|--------------------------------------------------------------------------------------------------------------------------------------------------------------------------------------------------------------------------------------------------------------------------------------------------------------------------------------------------------------------------------------------------------------------------------------------------------------------------------------------------------------------------------------------------------------------------------------------------------------------------------------------------------------------------------------------------------------------------------------------------------------------------------------------------------------------------------------------------------------------------------------------------------------------------------------------------------------------------------------------------------------------------------------------------------------------------------------------------------------------------------------------------------------------------------------------------------------------------------------------------------------------------------------------------------------------------------------------------------------------------------------------------------------------------------------------------------------------------------------------------------------------------------------------------------------------------------------------------------------------------------------------------------------------------------------------------------------------------------------------------------------------------------------------------------------------------------------------------------------------------------------------------------------------------------------------------------------------------------------------------------------------------------------------------------------------------------------------------------------------------------------------------------------------------------------------------------------------------------------------------------------------------------------------------------------------------------------------------------------------------------------------------------------------------------------------------------------------------------------------------------------------------------------------------------------------------------------------------------------------------------------------------------------------------------------------------------------------------------------------------------------------------------------------------------------------------------------------------------------------------------------------------------------------------------------------------------------------------------------------------------------------------------------------------------------------------------|-----------|--------------------------------------------------------------------------------------------------------------------------------|-----------------------------------------------------------------------------------------------------------------------------------|-----------------------------------------------------------------------------------------------------------------------------------------------------------------------------------------------------------------------------------------------------------------------------------------------------------------------------------------------------------|
| EPI_ISL_712250, EPI_ISL_712251, EPI_ISL_712252, EPI_ISL_712253, EPI_ISL_712295, EPI_ISL_712321, EPI_ISL_712340, EPI_ISL_712341, EPI_ISL_712342, EPI_ISL_712344, EPI_ISL_712345, EPI_ISL_712346, EPI_ISL_712455, EPI_ISL_712456, EPI_ISL_712457, EPI_ISL_712458, EPI_ISL_712459, EPI_ISL_712460, EPI_ISL_712461, EPI_ISL_712462, EPI_ISL_712463, EPI_ISL_712464, EPI_ISL_712465, EPI_ISL_712466, EPI_ISL_712467, EPI_ISL_712468, EPI_ISL_712469, EPI_ISL_712470, EPI_ISL_712471, EPI_ISL_712472, EPI_ISL_712473, EPI_ISL_712474, EPI_ISL_712475, EPI_ISL_712476, EPI_ISL_712477, EPI_ISL_712478, EPI_ISL_712479, EPI_ISL_712481, EPI_ISL_712482, EPI_ISL_712483, EPI_ISL_712484, EPI_ISL_712487, EPI_ISL_712488, EPI_ISL_712489, EPI_ISL_712490, EPI_ISL_712491, EPI_ISL_712492, EPI_ISL_712493, EPI_ISL_712494, EPI_ISL_712495, EPI_ISL_712496, EPI_ISL_712497, EPI_ISL_712498, EPI_ISL_712499, EPI_ISL_712500, EPI_ISL_712501, EPI_ISL_712502, EPI_ISL_712503, EPI_ISL_712504, EPI_ISL_712505, EPI_ISL_712506, EPI_ISL_712507, EPI_ISL_712508, EPI_ISL_712509, EPI_ISL_712511, EPI_ISL_712512, EPI_ISL_712513, EPI_ISL_712514, EPI_ISL_712515, EPI_ISL_712516, EPI_ISL_712517, EPI_ISL_712518, EPI_ISL_712519, EPI_ISL_712520, EPI_ISL_712521, EPI_ISL_712522, EPI_ISL_712523, EPI_ISL_712524, EPI_ISL_712525, EPI_ISL_712526, EPI_ISL_712527, EPI_ISL_712528, EPI_ISL_712529, EPI_ISL_712530                                                                                                                                                                                                                                                                                                                                                                                                                                                                                                                                                                                                                                                                                                                                                                                                                                                                                                                                                                                                                                                                                                                                                                                                                                                                                                                                                                                                                                                                                                                                                                                                                                                                                 | see above | Department of Virus and Microbiological Special Diagnostics, Statens Serum Institut, Copenhagen, Denmark                       | Albertsen Lab, Department of Chemistry and Bioscience, Aalborg University, Denmark                                                | Danish Covid-19 Genome Consortium                                                                                                                                                                                                                                                                                                                         |
| EPI_ISL_717701, EPI_ISL_717704, EPI_ISL_717705, EPI_ISL_717706, EPI_ISL_717708, EPI_ISL_717710, EPI_ISL_717711, EPI_ISL_717713                                                                                                                                                                                                                                                                                                                                                                                                                                                                                                                                                                                                                                                                                                                                                                                                                                                                                                                                                                                                                                                                                                                                                                                                                                                                                                                                                                                                                                                                                                                                                                                                                                                                                                                                                                                                                                                                                                                                                                                                                                                                                                                                                                                                                                                                                                                                                                                                                                                                                                                                                                                                                                                                                                                                                                                                                                                                                                                                                 |           | Area of Virology, Serology and Virology Division (SAVID), New South Wales Health Pathology Randwick                            | Virology Research Laboratory; Area of Virology, Serology and Virology Division (SAVID), New South Wales Health Pathology Randwick | Foster, C.; Au, J.; Ruiz Silva, M.; Deveson, I.; Bull, R.; Van Hal, S.; Rawlinson, W.                                                                                                                                                                                                                                                                     |
| EPI_ISL_717978                                                                                                                                                                                                                                                                                                                                                                                                                                                                                                                                                                                                                                                                                                                                                                                                                                                                                                                                                                                                                                                                                                                                                                                                                                                                                                                                                                                                                                                                                                                                                                                                                                                                                                                                                                                                                                                                                                                                                                                                                                                                                                                                                                                                                                                                                                                                                                                                                                                                                                                                                                                                                                                                                                                                                                                                                                                                                                                                                                                                                                                                 |           | Army Medical Center, Scientific Department, Virology Laboratory                                                                | Army Medical Center, Scientific Department, Virology Laboratory                                                                   | Silvia Fillo, Giovanni Faggioni, Riccardo De Santis, Antonella Fortunato, Anna Anselmo, Vanessa Vera Fain, Francesco Giordani, Nino D'Amore, Anella Monte, Marzia Cavalli, Alessandra Amoroso, Stella Lia, Roberta Sorrentino, Rossella Tirelli, Federica Galeano, Annalisa Pelo, Margherita De Santis, Giulia Campoli, Andrea Ciammaruconi, Florio Lista |
| EPI_ISL_718024                                                                                                                                                                                                                                                                                                                                                                                                                                                                                                                                                                                                                                                                                                                                                                                                                                                                                                                                                                                                                                                                                                                                                                                                                                                                                                                                                                                                                                                                                                                                                                                                                                                                                                                                                                                                                                                                                                                                                                                                                                                                                                                                                                                                                                                                                                                                                                                                                                                                                                                                                                                                                                                                                                                                                                                                                                                                                                                                                                                                                                                                 |           | Lab voor klinische biologie                                                                                                    | Onderzoeksgroep Virologie                                                                                                         | Laurens Lambrechts, Nick Vereecke, Marthe Pauwels, Bruno Verhasselt, Linos Vandekerckhove, Hans Nauwynck, Sebastiaan Theuns                                                                                                                                                                                                                               |
| EPI_ISL_718026                                                                                                                                                                                                                                                                                                                                                                                                                                                                                                                                                                                                                                                                                                                                                                                                                                                                                                                                                                                                                                                                                                                                                                                                                                                                                                                                                                                                                                                                                                                                                                                                                                                                                                                                                                                                                                                                                                                                                                                                                                                                                                                                                                                                                                                                                                                                                                                                                                                                                                                                                                                                                                                                                                                                                                                                                                                                                                                                                                                                                                                                 |           | Lab voor klinische biologie                                                                                                    | Onderzoeksgroep Virologie                                                                                                         | Nick Vereecke, Laurens Lambrechts, Marthe Pauwels, Bruno Verhasselt, Linos Vandekerckhove, Hans Nauwynck, Sebastiaan Theuns                                                                                                                                                                                                                               |
| EPI_ISL_718280                                                                                                                                                                                                                                                                                                                                                                                                                                                                                                                                                                                                                                                                                                                                                                                                                                                                                                                                                                                                                                                                                                                                                                                                                                                                                                                                                                                                                                                                                                                                                                                                                                                                                                                                                                                                                                                                                                                                                                                                                                                                                                                                                                                                                                                                                                                                                                                                                                                                                                                                                                                                                                                                                                                                                                                                                                                                                                                                                                                                                                                                 |           | Institute for Medical Research, Infectious Disease Research Centre, National Institutes of Health, Ministry of Health Malaysia | Institute for Medical Research, Infectious Disease Research Centre, National Institutes of Health, Ministry of Health Malaysia    | Suppiah J, Kamel K, Mohd-Zawawi Z, Thayan R                                                                                                                                                                                                                                                                                                               |
| EPI_ISL_718318, EPI_ISL_718320, EPI_ISL_718321, EPI_ISL_718322, EPI_ISL_718323, EPI_ISL_718324, EPI_ISL_718325, EPI_ISL_718327, EPI_ISL_718328, EPI_ISL_718329, EPI_ISL_718330, EPI_ISL_718331, EPI_ISL_718333, EPI_ISL_718334, EPI_ISL_718335, EPI_ISL_718336, EPI_ISL_718339, EPI_ISL_718340, EPI_ISL_718341, EPI_ISL_718342, EPI_ISL_718343, EPI_ISL_718344, EPI_ISL_718346, EPI_ISL_718347, EPI_ISL_718348, EPI_ISL_718349, EPI_ISL_718350, EPI_ISL_718351, EPI_ISL_718352, EPI_ISL_718355, EPI_ISL_718356, EPI_ISL_718357, EPI_ISL_718359, EPI_ISL_718360, EPI_ISL_718361, EPI_ISL_718364, EPI_ISL_718366, EPI_ISL_718367, EPI_ISL_718369, EPI_ISL_718370, EPI_ISL_718371, EPI_ISL_718372, EPI_ISL_718374, EPI_ISL_718376, EPI_ISL_718377, EPI_ISL_718378, EPI_ISL_718379, EPI_ISL_718381, EPI_ISL_718382, EPI_ISL_718383, EPI_ISL_718384, EPI_ISL_718386, EPI_ISL_718387, EPI_ISL_718388, EPI_ISL_718390, EPI_ISL_718391, EPI_ISL_718392, EPI_ISL_718394, EPI_ISL_718395, EPI_ISL_718397, EPI_ISL_718399, EPI_ISL_718401, EPI_ISL_718405, EPI_ISL_718406, EPI_ISL_718407, EPI_ISL_718408, EPI_ISL_718409, EPI_ISL_718410, EPI_ISL_718413, EPI_ISL_718415, EPI_ISL_718416, EPI_ISL_718417, EPI_ISL_718419, EPI_ISL_718420, EPI_ISL_718422, EPI_ISL_718423, EPI_ISL_718424, EPI_ISL_718425, EPI_ISL_718426, EPI_ISL_718427, EPI_ISL_718429, EPI_ISL_718431, EPI_ISL_718433, EPI_ISL_718434, EPI_ISL_718435, EPI_ISL_718436, EPI_ISL_718437, EPI_ISL_718438, EPI_ISL_718439, EPI_ISL_718440, EPI_ISL_718441, EPI_ISL_718444, EPI_ISL_718445, EPI_ISL_718446, EPI_ISL_718447, EPI_ISL_718448, EPI_ISL_718449, EPI_ISL_718450, EPI_ISL_718451, EPI_ISL_718452, EPI_ISL_718453, EPI_ISL_718454, EPI_ISL_718455, EPI_ISL_718456, EPI_ISL_718459, EPI_ISL_718461, EPI_ISL_718462, EPI_ISL_718463, EPI_ISL_718465, EPI_ISL_718466, EPI_ISL_718467, EPI_ISL_718469, EPI_ISL_718470, EPI_ISL_718471, EPI_ISL_718472, EPI_ISL_718474, EPI_ISL_718475, EPI_ISL_718477, EPI_ISL_718478, EPI_ISL_718480, EPI_ISL_718481, EPI_ISL_718482, EPI_ISL_718483, EPI_ISL_718485, EPI_ISL_718487, EPI_ISL_718488, EPI_ISL_718489, EPI_ISL_718490, EPI_ISL_718491, EPI_ISL_718493, EPI_ISL_718494, EPI_ISL_718495, EPI_ISL_718496, EPI_ISL_718497, EPI_ISL_718499, EPI_ISL_718501, EPI_ISL_718503, EPI_ISL_718504, EPI_ISL_718505, EPI_ISL_718507, EPI_ISL_718522, EPI_ISL_718524, EPI_ISL_718525, EPI_ISL_718526, EPI_ISL_718527, EPI_ISL_718529, EPI_ISL_718530, EPI_ISL_718531, EPI_ISL_718533, EPI_ISL_718534, EPI_ISL_718536, EPI_ISL_718537, EPI_ISL_718538, EPI_ISL_718539, EPI_ISL_718540, EPI_ISL_718542, EPI_ISL_718544, EPI_ISL_718545, EPI_ISL_718546, EPI_ISL_718547, EPI_ISL_718548, EPI_ISL_718549, EPI_ISL_718551, EPI_ISL_718553, EPI_ISL_718554, EPI_ISL_718555, EPI_ISL_718556, EPI_ISL_718558, EPI_ISL_718559, EPI_ISL_718590, EPI_ISL_718591, EPI_ISL_718592, EPI_ISL_718594, EPI_ISL_718596, EPI_ISL_718603, EPI_ISL_718604, EPI_ISL_718608, EPI_ISL_718613, EPI_ISL_718614, EPI_ISL_718616, EPI_ISL_718619, EPI_ISL_718620, EPI_ISL_718623, EPI_ISL_718626, EPI_ISL_718632 | see above | Lighthouse Lab in Cambridge                                                                                                    | Wellcome Sanger Institute for the COVID-19 Genomics UK (COG-UK) Consortium                                                        | Rob Howes, The Lighthouse Lab in Cambridge and Alex Alderton, Roberto Amato, Sonia Goncalves, Ewan Harrison, David K. Jackson, Ian Johnston, Dominic Kwiatkowski, Cordelia Langford, John Sillitoe on behalf of the Wellcome Sanger Institute COVID-19 Surveillance Team                                                                                  |
| EPI_ISL_718637, EPI_ISL_718639, EPI_ISL_718640, EPI_ISL_718643, EPI_ISL_718644                                                                                                                                                                                                                                                                                                                                                                                                                                                                                                                                                                                                                                                                                                                                                                                                                                                                                                                                                                                                                                                                                                                                                                                                                                                                                                                                                                                                                                                                                                                                                                                                                                                                                                                                                                                                                                                                                                                                                                                                                                                                                                                                                                                                                                                                                                                                                                                                                                                                                                                                                                                                                                                                                                                                                                                                                                                                                                                                                                                                 |           | Lighthouse Lab in Alderley Park                                                                                                | Wellcome Sanger Institute for the COVID-19 Genomics UK (COG-UK) Consortium                                                        | Jacquelyn Wynn, Mairead Hyland, The Lighthouse Lab in Alderley Park and Alex Alderton, Roberto Amato, Sonia Goncalves, Ewan Harrison, David K. Jackson, Ian Johnston, Dominic Kwiatkowski, Cordelia Langford, John Sillitoe on behalf of the Wellcome Sanger Institute COVID-19 Surveillance Team                                                         |
| EPI_ISL_718645, EPI_ISL_718646, EPI_ISL_718648, EPI_ISL_718649, EPI_ISL_718651                                                                                                                                                                                                                                                                                                                                                                                                                                                                                                                                                                                                                                                                                                                                                                                                                                                                                                                                                                                                                                                                                                                                                                                                                                                                                                                                                                                                                                                                                                                                                                                                                                                                                                                                                                                                                                                                                                                                                                                                                                                                                                                                                                                                                                                                                                                                                                                                                                                                                                                                                                                                                                                                                                                                                                                                                                                                                                                                                                                                 |           | Lighthouse Lab in Cambridge                                                                                                    | Wellcome Sanger Institute for the COVID-19 Genomics UK (COG-UK) Consortium                                                        | Rob Howes, The Lighthouse Lab in Cambridge and Alex Alderton, Roberto Amato, Sonia Goncalves, Ewan Harrison, David K. Jackson, Ian Johnston, Dominic Kwiatkowski, Cordelia Langford, John Sillitoe on behalf of the Wellcome Sanger Institute COVID-19 Surveillance Team                                                                                  |
| EPI_ISL_718653                                                                                                                                                                                                                                                                                                                                                                                                                                                                                                                                                                                                                                                                                                                                                                                                                                                                                                                                                                                                                                                                                                                                                                                                                                                                                                                                                                                                                                                                                                                                                                                                                                                                                                                                                                                                                                                                                                                                                                                                                                                                                                                                                                                                                                                                                                                                                                                                                                                                                                                                                                                                                                                                                                                                                                                                                                                                                                                                                                                                                                                                 |           | Lighthouse Lab in Alderley Park                                                                                                | Wellcome Sanger Institute for the COVID-19 Genomics UK (COG-UK) Consortium                                                        | Jacquelyn Wynn, Mairead Hyland, The Lighthouse Lab in Alderley Park and Alex Alderton, Roberto Amato, Sonia Goncalves, Ewan Harrison, David K. Jackson, Ian Johnston, Dominic Kwiatkowski, Cordelia Langford, John Sillitoe on behalf of the Wellcome Sanger Institute COVID-19 Surveillance Team                                                         |
| EPI_ISL_718655, EPI_ISL_718656                                                                                                                                                                                                                                                                                                                                                                                                                                                                                                                                                                                                                                                                                                                                                                                                                                                                                                                                                                                                                                                                                                                                                                                                                                                                                                                                                                                                                                                                                                                                                                                                                                                                                                                                                                                                                                                                                                                                                                                                                                                                                                                                                                                                                                                                                                                                                                                                                                                                                                                                                                                                                                                                                                                                                                                                                                                                                                                                                                                                                                                 |           | Lighthouse Lab in Cambridge                                                                                                    | Wellcome Sanger Institute for the COVID-19 Genomics UK (COG-UK) Consortium                                                        | Rob Howes, The Lighthouse Lab in Cambridge and Alex Alderton, Roberto Amato, Sonia Goncalves, Ewan Harrison, David K. Jackson, Ian Johnston, Dominic Kwiatkowski, Cordelia Langford, John Sillitoe on behalf of the Wellcome Sanger Institute COVID-19 Surveillance Team                                                                                  |
| EPI_ISL_718657, EPI_ISL_718658                                                                                                                                                                                                                                                                                                                                                                                                                                                                                                                                                                                                                                                                                                                                                                                                                                                                                                                                                                                                                                                                                                                                                                                                                                                                                                                                                                                                                                                                                                                                                                                                                                                                                                                                                                                                                                                                                                                                                                                                                                                                                                                                                                                                                                                                                                                                                                                                                                                                                                                                                                                                                                                                                                                                                                                                                                                                                                                                                                                                                                                 |           | Lighthouse Lab in Alderley Park                                                                                                | Wellcome Sanger Institute for the COVID-19 Genomics UK (COG-UK) Consortium                                                        | Jacquelyn Wynn, Mairead Hyland, The Lighthouse Lab in Alderley Park and Alex Alderton, Roberto Amato, Sonia Goncalves, Ewan Harrison, David K. Jackson, Ian Johnston, Dominic Kwiatkowski, Cordelia Langford, John Sillitoe on behalf of the Wellcome Sanger Institute COVID-19 Surveillance Team                                                         |
| EPI_ISL_718659, EPI_ISL_718660, EPI_ISL_718661                                                                                                                                                                                                                                                                                                                                                                                                                                                                                                                                                                                                                                                                                                                                                                                                                                                                                                                                                                                                                                                                                                                                                                                                                                                                                                                                                                                                                                                                                                                                                                                                                                                                                                                                                                                                                                                                                                                                                                                                                                                                                                                                                                                                                                                                                                                                                                                                                                                                                                                                                                                                                                                                                                                                                                                                                                                                                                                                                                                                                                 |           | Lighthouse Lab in Cambridge                                                                                                    | Wellcome Sanger Institute for the COVID-19 Genomics UK (COG-UK) Consortium                                                        | Rob Howes, The Lighthouse Lab in Cambridge and Alex Alderton, Roberto Amato, Sonia Goncalves, Ewan Harrison, David K. Jackson, Ian Johnston, Dominic Kwiatkowski, Cordelia Langford, John Sillitoe on behalf of the Wellcome Sanger Institute COVID-19 Surveillance Team                                                                                  |
| EPI_ISL_718662, EPI_ISL_718663, EPI_ISL_718664, EPI_ISL_718665, EPI_ISL_718666                                                                                                                                                                                                                                                                                                                                                                                                                                                                                                                                                                                                                                                                                                                                                                                                                                                                                                                                                                                                                                                                                                                                                                                                                                                                                                                                                                                                                                                                                                                                                                                                                                                                                                                                                                                                                                                                                                                                                                                                                                                                                                                                                                                                                                                                                                                                                                                                                                                                                                                                                                                                                                                                                                                                                                                                                                                                                                                                                                                                 |           | Lighthouse Lab in Alderley Park                                                                                                | Wellcome Sanger Institute for the COVID-19 Genomics UK (COG-UK) Consortium                                                        | Jacquelyn Wynn, Mairead Hyland, The Lighthouse Lab in Alderley Park and Alex Alderton, Roberto Amato, Sonia Goncalves, Ewan Harrison, David K. Jackson, Ian Johnston, Dominic Kwiatkowski, Cordelia Langford, John Sillitoe on behalf of the Wellcome Sanger Institute COVID-19 Surveillance Team                                                         |
| EPI_ISL_718667, EPI_ISL_718668, EPI_ISL_718669                                                                                                                                                                                                                                                                                                                                                                                                                                                                                                                                                                                                                                                                                                                                                                                                                                                                                                                                                                                                                                                                                                                                                                                                                                                                                                                                                                                                                                                                                                                                                                                                                                                                                                                                                                                                                                                                                                                                                                                                                                                                                                                                                                                                                                                                                                                                                                                                                                                                                                                                                                                                                                                                                                                                                                                                                                                                                                                                                                                                                                 |           | Lighthouse Lab in Cambridge                                                                                                    | Wellcome Sanger Institute for the COVID-19 Genomics UK (COG-UK) Consortium                                                        | Rob Howes, The Lighthouse Lab in Cambridge and Alex Alderton, Roberto Amato, Sonia Goncalves, Ewan Harrison, David K. Jackson, Ian Johnston, Dominic Kwiatkowski, Cordelia Langford, John Sillitoe on behalf of the Wellcome Sanger Institute COVID-19 Surveillance Team                                                                                  |
| EPI_ISL_718670                                                                                                                                                                                                                                                                                                                                                                                                                                                                                                                                                                                                                                                                                                                                                                                                                                                                                                                                                                                                                                                                                                                                                                                                                                                                                                                                                                                                                                                                                                                                                                                                                                                                                                                                                                                                                                                                                                                                                                                                                                                                                                                                                                                                                                                                                                                                                                                                                                                                                                                                                                                                                                                                                                                                                                                                                                                                                                                                                                                                                                                                 |           | Lighthouse Lab in Alderley Park                                                                                                | Wellcome Sanger Institute for the COVID-19 Genomics UK (COG-UK) Consortium                                                        | Jacquelyn Wynn, Mairead Hyland, The Lighthouse Lab in Alderley Park and Alex Alderton, Roberto Amato, Sonia Goncalves, Ewan Harrison, David K. Jackson, Ian Johnston, Dominic Kwiatkowski, Cordelia Langford, John Sillitoe on behalf of the Wellcome Sanger Institute COVID-19 Surveillance Team                                                         |
| EPI_ISL_718671                                                                                                                                                                                                                                                                                                                                                                                                                                                                                                                                                                                                                                                                                                                                                                                                                                                                                                                                                                                                                                                                                                                                                                                                                                                                                                                                                                                                                                                                                                                                                                                                                                                                                                                                                                                                                                                                                                                                                                                                                                                                                                                                                                                                                                                                                                                                                                                                                                                                                                                                                                                                                                                                                                                                                                                                                                                                                                                                                                                                                                                                 |           | Lighthouse Lab in Cambridge                                                                                                    | Wellcome Sanger Institute for the COVID-19 Genomics UK (COG-UK) Consortium                                                        | Rob Howes, The Lighthouse Lab in Cambridge and Alex Alderton, Roberto Amato, Sonia Goncalves, Ewan Harrison, David K. Jackson, Ian Johnston, Dominic Kwiatkowski, Cordelia Langford, John Sillitoe on behalf of the Wellcome Sanger Institute COVID-19 Surveillance Team                                                                                  |
| EPI_ISL_718674, EPI_ISL_718676, EPI_ISL_718678                                                                                                                                                                                                                                                                                                                                                                                                                                                                                                                                                                                                                                                                                                                                                                                                                                                                                                                                                                                                                                                                                                                                                                                                                                                                                                                                                                                                                                                                                                                                                                                                                                                                                                                                                                                                                                                                                                                                                                                                                                                                                                                                                                                                                                                                                                                                                                                                                                                                                                                                                                                                                                                                                                                                                                                                                                                                                                                                                                                                                                 |           | Lighthouse Lab in Alderley Park                                                                                                | Wellcome Sanger Institute for the COVID-19 Genomics UK (COG-UK) Consortium                                                        | Jacquelyn Wynn, Mairead Hyland, The Lighthouse Lab in Alderley Park and Alex Alderton, Roberto Amato, Sonia Goncalves, Ewan Harrison, David K. Jackson, Ian Johnston, Dominic Kwiatkowski, Cordelia Langford, John Sillitoe on behalf of the Wellcome Sanger Institute COVID-19 Surveillance Team                                                         |
| EPI_ISL_718679, EPI_ISL_718680, EPI_ISL_718681, EPI_ISL_718683, EPI_ISL_718684                                                                                                                                                                                                                                                                                                                                                                                                                                                                                                                                                                                                                                                                                                                                                                                                                                                                                                                                                                                                                                                                                                                                                                                                                                                                                                                                                                                                                                                                                                                                                                                                                                                                                                                                                                                                                                                                                                                                                                                                                                                                                                                                                                                                                                                                                                                                                                                                                                                                                                                                                                                                                                                                                                                                                                                                                                                                                                                                                                                                 |           | Lighthouse Lab in Cambridge                                                                                                    | Wellcome Sanger Institute for the COVID-19 Genomics UK (COG-UK) Consortium                                                        | Rob Howes, The Lighthouse Lab in Cambridge and Alex Alderton, Roberto Amato, Sonia Goncalves, Ewan Harrison, David K. Jackson, Ian Johnston, Dominic Kwiatkowski, Cordelia Langford, John Sillitoe on behalf of the Wellcome Sanger Institute COVID-19 Surveillance Team                                                                                  |
| EPI_ISL_718686, EPI_ISL_718687                                                                                                                                                                                                                                                                                                                                                                                                                                                                                                                                                                                                                                                                                                                                                                                                                                                                                                                                                                                                                                                                                                                                                                                                                                                                                                                                                                                                                                                                                                                                                                                                                                                                                                                                                                                                                                                                                                                                                                                                                                                                                                                                                                                                                                                                                                                                                                                                                                                                                                                                                                                                                                                                                                                                                                                                                                                                                                                                                                                                                                                 |           | Lighthouse Lab in Alderley Park                                                                                                | Wellcome Sanger Institute for the COVID-19 Genomics UK (COG-UK) Consortium                                                        | Jacquelyn Wynn, Mairead Hyland, The Lighthouse Lab in Alderley Park and Alex Alderton, Roberto Amato, Sonia Goncalves, Ewan Harrison, David K. Jackson, Ian Johnston, Dominic Kwiatkowski, Cordelia Langford, John Sillitoe on behalf of the Wellcome Sanger Institute COVID-19 Surveillance Team                                                         |
| EPI_ISL_718688, EPI_ISL_718689, EPI_ISL_718690                                                                                                                                                                                                                                                                                                                                                                                                                                                                                                                                                                                                                                                                                                                                                                                                                                                                                                                                                                                                                                                                                                                                                                                                                                                                                                                                                                                                                                                                                                                                                                                                                                                                                                                                                                                                                                                                                                                                                                                                                                                                                                                                                                                                                                                                                                                                                                                                                                                                                                                                                                                                                                                                                                                                                                                                                                                                                                                                                                                                                                 |           | Lighthouse Lab in Cambridge                                                                                                    | Wellcome Sanger Institute for the COVID-19 Genomics UK (COG-UK) Consortium                                                        | Rob Howes, The Lighthouse Lab in Cambridge and Alex Alderton, Roberto Amato, Sonia Goncalves, Ewan Harrison, David K. Jackson, Ian Johnston, Dominic Kwiatkowski, Cordelia Langford, John Sillitoe on behalf of the Wellcome Sanger Institute COVID-19 Surveillance Team                                                                                  |
| EPI_ISL_718691                                                                                                                                                                                                                                                                                                                                                                                                                                                                                                                                                                                                                                                                                                                                                                                                                                                                                                                                                                                                                                                                                                                                                                                                                                                                                                                                                                                                                                                                                                                                                                                                                                                                                                                                                                                                                                                                                                                                                                                                                                                                                                                                                                                                                                                                                                                                                                                                                                                                                                                                                                                                                                                                                                                                                                                                                                                                                                                                                                                                                                                                 |           | Lighthouse Lab in Alderley Park                                                                                                | Wellcome Sanger Institute for the COVID-19 Genomics UK (COG-UK) Consortium                                                        | Jacquelyn Wynn, Mairead Hyland, The Lighthouse Lab in Alderley Park and Alex Alderton, Roberto Amato, Sonia Goncalves, Ewan Harrison, David K. Jackson, Ian Johnston, Dominic Kwiatkowski, Cordelia Langford, John Sillitoe on behalf of the Wellcome Sanger Institute COVID-19 Surveillance Team                                                         |
| EPI_ISL_718692, EPI_ISL_718693                                                                                                                                                                                                                                                                                                                                                                                                                                                                                                                                                                                                                                                                                                                                                                                                                                                                                                                                                                                                                                                                                                                                                                                                                                                                                                                                                                                                                                                                                                                                                                                                                                                                                                                                                                                                                                                                                                                                                                                                                                                                                                                                                                                                                                                                                                                                                                                                                                                                                                                                                                                                                                                                                                                                                                                                                                                                                                                                                                                                                                                 |           | Lighthouse Lab in Cambridge                                                                                                    | Wellcome Sanger Institute for the COVID-19 Genomics UK (COG-UK) Consortium                                                        | Rob Howes, The Lighthouse Lab in Cambridge and Alex Alderton, Roberto Amato, Sonia Goncalves, Ewan Harrison, David K. Jackson, Ian Johnston, Dominic Kwiatkowski, Cordelia Langford, John Sillitoe on behalf of the Wellcome Sanger Institute COVID-19 Surveillance Team                                                                                  |
| EPI_ISL_718694, EPI_ISL_718695                                                                                                                                                                                                                                                                                                                                                                                                                                                                                                                                                                                                                                                                                                                                                                                                                                                                                                                                                                                                                                                                                                                                                                                                                                                                                                                                                                                                                                                                                                                                                                                                                                                                                                                                                                                                                                                                                                                                                                                                                                                                                                                                                                                                                                                                                                                                                                                                                                                                                                                                                                                                                                                                                                                                                                                                                                                                                                                                                                                                                                                 |           | Lighthouse Lab in Alderley Park                                                                                                | Wellcome Sanger Institute for the COVID-19 Genomics UK (COG-UK) Consortium                                                        | Jacquelyn Wynn, Mairead Hyland, The Lighthouse Lab in Alderley Park and Alex Alderton, Roberto Amato, Sonia Goncalves, Ewan Harrison, David K. Jackson, Ian Johnston, Dominic Kwiatkowski, Cordelia Langford, John Sillitoe on behalf of the Wellcome Sanger Institute COVID-19 Surveillance Team                                                         |
| EPI_ISL_718696, EPI_ISL_718697, EPI_ISL_718698, EPI_ISL_718699                                                                                                                                                                                                                                                                                                                                                                                                                                                                                                                                                                                                                                                                                                                                                                                                                                                                                                                                                                                                                                                                                                                                                                                                                                                                                                                                                                                                                                                                                                                                                                                                                                                                                                                                                                                                                                                                                                                                                                                                                                                                                                                                                                                                                                                                                                                                                                                                                                                                                                                                                                                                                                                                                                                                                                                                                                                                                                                                                                                                                 |           | Lighthouse Lab in Cambridge                                                                                                    | Wellcome Sanger Institute for the COVID-19 Genomics UK (COG-UK) Consortium                                                        | Rob Howes, The Lighthouse Lab in Cambridge and Alex Alderton, Roberto Amato, Sonia Goncalves, Ewan Harrison, David K. Jackson, Ian Johnston, Dominic Kwiatkowski, Cordelia Langford, John Sillitoe on behalf of the Wellcome Sanger Institute COVID-19 Surveillance Team                                                                                  |
| EPI_ISL_718700                                                                                                                                                                                                                                                                                                                                                                                                                                                                                                                                                                                                                                                                                                                                                                                                                                                                                                                                                                                                                                                                                                                                                                                                                                                                                                                                                                                                                                                                                                                                                                                                                                                                                                                                                                                                                                                                                                                                                                                                                                                                                                                                                                                                                                                                                                                                                                                                                                                                                                                                                                                                                                                                                                                                                                                                                                                                                                                                                                                                                                                                 |           | Lighthouse Lab in Alderley Park                                                                                                | Wellcome Sanger Institute for the COVID-19 Genomics UK                                                                            | Jacquelyn Wynn, Mairead Hyland, The Lighthouse Lab in Alderley Park and Alex Alderton, Roberto Amato, Sonia Goncalves, Ewan Harrison, David K.                                                                                                                                                                                                            |



[illegible]

[illegible]

[illegible]



[illegible]

[illegible]



|                                                                                                                                                                                                                                                                                                                                                                                                                                                                                                                                                                                                                                                                                                                                                                                                                                                                                                                                                                                                                                                                                                                                                                                                                                                                                                                                                                                                                                                                                                                                                                                                                                                                                                                                                                                                                                                                                                                                |                                                                                   |                                                                            |                                                                                                                                                                                                                                                                                                                                                                                           |
|--------------------------------------------------------------------------------------------------------------------------------------------------------------------------------------------------------------------------------------------------------------------------------------------------------------------------------------------------------------------------------------------------------------------------------------------------------------------------------------------------------------------------------------------------------------------------------------------------------------------------------------------------------------------------------------------------------------------------------------------------------------------------------------------------------------------------------------------------------------------------------------------------------------------------------------------------------------------------------------------------------------------------------------------------------------------------------------------------------------------------------------------------------------------------------------------------------------------------------------------------------------------------------------------------------------------------------------------------------------------------------------------------------------------------------------------------------------------------------------------------------------------------------------------------------------------------------------------------------------------------------------------------------------------------------------------------------------------------------------------------------------------------------------------------------------------------------------------------------------------------------------------------------------------------------|-----------------------------------------------------------------------------------|----------------------------------------------------------------------------|-------------------------------------------------------------------------------------------------------------------------------------------------------------------------------------------------------------------------------------------------------------------------------------------------------------------------------------------------------------------------------------------|
| EPI_ISL_728285                                                                                                                                                                                                                                                                                                                                                                                                                                                                                                                                                                                                                                                                                                                                                                                                                                                                                                                                                                                                                                                                                                                                                                                                                                                                                                                                                                                                                                                                                                                                                                                                                                                                                                                                                                                                                                                                                                                 | National Institute for Infectious Diseases, INMI, "L. Spallanzani" IRCCS          | National Institute for Infectious Diseases, INMI, "L. Spallanzani" IRCCS   | F Messina, E Giombini, M Rueca, B Bartolini, C.E.M Gruber, MR Capobianchi, A Di Caro                                                                                                                                                                                                                                                                                                      |
| EPI_ISL_728299                                                                                                                                                                                                                                                                                                                                                                                                                                                                                                                                                                                                                                                                                                                                                                                                                                                                                                                                                                                                                                                                                                                                                                                                                                                                                                                                                                                                                                                                                                                                                                                                                                                                                                                                                                                                                                                                                                                 | Lighthouse Lab in Cambridge                                                       | Wellcome Sanger Institute for the COVID-19 Genomics UK (COG-UK) Consortium | Rob Howes, The Lighthouse Lab in Cambridge and Alex Alderton, Roberto Amato, Sonia Goncalves, Ewan Harrison, David K. Jackson, Ian Johnston, Dominic Kwiatkowski, Cordelia Langford, John Sillitoe on behalf of the Wellcome Sanger Institute COVID-19 Surveillance Team                                                                                                                  |
| EPI_ISL_728331, EPI_ISL_728333, EPI_ISL_728335                                                                                                                                                                                                                                                                                                                                                                                                                                                                                                                                                                                                                                                                                                                                                                                                                                                                                                                                                                                                                                                                                                                                                                                                                                                                                                                                                                                                                                                                                                                                                                                                                                                                                                                                                                                                                                                                                 | Jena University Hospital, Institute for Infectious Diseases and Infection Control | Institute of infectious medicine & hospital hygiene, CaSe-Group            | Spott, Riccardo; Marquet, Mike; Pletz, Matthias W.; Brandt, Christian                                                                                                                                                                                                                                                                                                                     |
| EPI_ISL_728566, EPI_ISL_728567, EPI_ISL_728568, EPI_ISL_728569, EPI_ISL_728570, EPI_ISL_728571, EPI_ISL_728572, EPI_ISL_728573, EPI_ISL_728574, EPI_ISL_728575, EPI_ISL_728576, EPI_ISL_728577, EPI_ISL_728578, EPI_ISL_728579, EPI_ISL_728580, EPI_ISL_728581, EPI_ISL_728582, EPI_ISL_728583, EPI_ISL_728584, EPI_ISL_728585, EPI_ISL_728586, EPI_ISL_728587, EPI_ISL_728588, EPI_ISL_728589, EPI_ISL_728590, EPI_ISL_728591, EPI_ISL_728592, EPI_ISL_728593, EPI_ISL_728594, EPI_ISL_728595, EPI_ISL_728596, EPI_ISL_728597, EPI_ISL_728598, EPI_ISL_728599, EPI_ISL_728600, EPI_ISL_728601, EPI_ISL_728602, EPI_ISL_728603, EPI_ISL_728604, EPI_ISL_728605, EPI_ISL_728606, EPI_ISL_728607, EPI_ISL_728608, EPI_ISL_728609, EPI_ISL_728610, EPI_ISL_728611, EPI_ISL_728612, EPI_ISL_728613, EPI_ISL_728614, EPI_ISL_728615, EPI_ISL_728616, EPI_ISL_728617, EPI_ISL_728618, EPI_ISL_728619, EPI_ISL_728620, EPI_ISL_728621, EPI_ISL_728622, EPI_ISL_728623, EPI_ISL_728624, EPI_ISL_728625, EPI_ISL_728626, EPI_ISL_728627, EPI_ISL_728628, EPI_ISL_728629, EPI_ISL_728630, EPI_ISL_728631, EPI_ISL_728632, EPI_ISL_728633, EPI_ISL_728634, EPI_ISL_728635, EPI_ISL_728636, EPI_ISL_728637, EPI_ISL_728642, EPI_ISL_728644, EPI_ISL_728645, EPI_ISL_728646, EPI_ISL_728647, EPI_ISL_728648, EPI_ISL_728649, EPI_ISL_728650, EPI_ISL_728651, EPI_ISL_728652, EPI_ISL_728653, EPI_ISL_728654, EPI_ISL_728655, EPI_ISL_728656, EPI_ISL_728657, EPI_ISL_728658, EPI_ISL_728659, EPI_ISL_728660, EPI_ISL_728661, EPI_ISL_728662, EPI_ISL_728663, EPI_ISL_728664, EPI_ISL_728665, EPI_ISL_728666, EPI_ISL_728667, EPI_ISL_728668, EPI_ISL_728669, EPI_ISL_728670, EPI_ISL_728701, EPI_ISL_728702, EPI_ISL_728703, EPI_ISL_728721, EPI_ISL_728722, EPI_ISL_728738, EPI_ISL_728739, EPI_ISL_728740, EPI_ISL_728741, EPI_ISL_728742, EPI_ISL_728743, EPI_ISL_728744, EPI_ISL_728745, EPI_ISL_728746, EPI_ISL_728747, EPI_ISL_728763 |                                                                                   |                                                                            |                                                                                                                                                                                                                                                                                                                                                                                           |
| see above                                                                                                                                                                                                                                                                                                                                                                                                                                                                                                                                                                                                                                                                                                                                                                                                                                                                                                                                                                                                                                                                                                                                                                                                                                                                                                                                                                                                                                                                                                                                                                                                                                                                                                                                                                                                                                                                                                                      | Dutch COVID-19 response team                                                      | National Institute for Public Health and the Environment (RIVM)            | Adam Meijer, Harry Vennema, Jeroen Cremer, Sharon van den Brink, Bas van der Veer, AnneMarie van den Brandt, Florian Zwagemaker, Dennis Schmitz, Chantal Reusken, on behalf of the national COVID-19 response team                                                                                                                                                                        |
| EPI_ISL_729053                                                                                                                                                                                                                                                                                                                                                                                                                                                                                                                                                                                                                                                                                                                                                                                                                                                                                                                                                                                                                                                                                                                                                                                                                                                                                                                                                                                                                                                                                                                                                                                                                                                                                                                                                                                                                                                                                                                 | Viollier AG                                                                       | Department of Biosystems Science and Engineering, ETH Zürich               | Christian Beisel, Sarah Nadeau, Chaoran Chen, Ivan Topolsky, Pedro Ferreira, Philipp Jablonski, Susana Posada-Céspedes, Tobias Schär, Ina Nissen, Natascha Santacroce, Elodie Burcklen, Christiane Beckmann, Maurice Redondo, Olivier Kobel, Christoph Noppen, Sophie Seidel, Noemie Santamaria de Souza, Niko Beerenwinkel, Tanja Stadler                                                |
| EPI_ISL_729107                                                                                                                                                                                                                                                                                                                                                                                                                                                                                                                                                                                                                                                                                                                                                                                                                                                                                                                                                                                                                                                                                                                                                                                                                                                                                                                                                                                                                                                                                                                                                                                                                                                                                                                                                                                                                                                                                                                 | Viollier AG                                                                       | Department of Biosystems Science and Engineering, ETH Zürich               | Chaoran Chen, Sarah Nadeau, Catharine Aquino, Ivan Topolsky, Pedro Ferreira, Philipp Jablonski, Susana Posada-Céspedes, Andreia Cabral de Gouvea, Maria Domenica Moccia, Simon Grüter, Timothy Sykes, Lennart Opitz, Ralph Schlapbach, Christiane Beckmann, Maurice Redondo, Olivier Kobel, Christoph Noppen, Sophie Seidel, Noemie Santamaria de Souza, Niko Beerenwinkel, Tanja Stadler |
| EPI_ISL_729152, EPI_ISL_729154, EPI_ISL_729156, EPI_ISL_729162                                                                                                                                                                                                                                                                                                                                                                                                                                                                                                                                                                                                                                                                                                                                                                                                                                                                                                                                                                                                                                                                                                                                                                                                                                                                                                                                                                                                                                                                                                                                                                                                                                                                                                                                                                                                                                                                 | Viollier AG                                                                       | Department of Biosystems Science and Engineering, ETH Zürich               | Christian Beisel, Sarah Nadeau, Chaoran Chen, Ivan Topolsky, Pedro Ferreira, Philipp Jablonski, Susana Posada-Céspedes, Tobias Schär, Ina Nissen, Natascha Santacroce, Elodie Burcklen, Christiane Beckmann, Maurice Redondo, Olivier Kobel, Christoph Noppen, Sophie Seidel, Noemie Santamaria de Souza, Niko Beerenwinkel, Tanja Stadler                                                |
| EPI_ISL_729416, EPI_ISL_729449, EPI_ISL_729450, EPI_ISL_729451, EPI_ISL_729453, EPI_ISL_729454, EPI_ISL_729455, EPI_ISL_729457, EPI_ISL_729458, EPI_ISL_729463, EPI_ISL_729697, EPI_ISL_729698, EPI_ISL_729699, EPI_ISL_729700, EPI_ISL_729701, EPI_ISL_729702, EPI_ISL_729703, EPI_ISL_729705, EPI_ISL_729706, EPI_ISL_729709, EPI_ISL_729710, EPI_ISL_729711, EPI_ISL_729712, EPI_ISL_729713, EPI_ISL_729714, EPI_ISL_729716, EPI_ISL_729719, EPI_ISL_729721, EPI_ISL_729724, EPI_ISL_729725, EPI_ISL_729726, EPI_ISL_729727                                                                                                                                                                                                                                                                                                                                                                                                                                                                                                                                                                                                                                                                                                                                                                                                                                                                                                                                                                                                                                                                                                                                                                                                                                                                                                                                                                                                 |                                                                                   |                                                                            |                                                                                                                                                                                                                                                                                                                                                                                           |
| see above                                                                                                                                                                                                                                                                                                                                                                                                                                                                                                                                                                                                                                                                                                                                                                                                                                                                                                                                                                                                                                                                                                                                                                                                                                                                                                                                                                                                                                                                                                                                                                                                                                                                                                                                                                                                                                                                                                                      | A. Krumbholz, Labor Dr. Krause und Kollegen MVZ GmbH, Kiel                        | Charité Universitätsmedizin Berlin, Institut für Virologie                 | Victor M Corman, Barbara Mühlemann, Jörn Beheim-Schwarzbach, Talitha Veith, Julia Schneider, Terry Jones, Christian Drosten                                                                                                                                                                                                                                                               |
| EPI_ISL_730291, EPI_ISL_730299, EPI_ISL_730307, EPI_ISL_730312, EPI_ISL_730313, EPI_ISL_730315, EPI_ISL_730340, EPI_ISL_730353, EPI_ISL_730354, EPI_ISL_730355, EPI_ISL_730358, EPI_ISL_730359, EPI_ISL_730361, EPI_ISL_730362, EPI_ISL_730363, EPI_ISL_730365, EPI_ISL_730366, EPI_ISL_730369                                                                                                                                                                                                                                                                                                                                                                                                                                                                                                                                                                                                                                                                                                                                                                                                                                                                                                                                                                                                                                                                                                                                                                                                                                                                                                                                                                                                                                                                                                                                                                                                                                 |                                                                                   |                                                                            |                                                                                                                                                                                                                                                                                                                                                                                           |
| see above                                                                                                                                                                                                                                                                                                                                                                                                                                                                                                                                                                                                                                                                                                                                                                                                                                                                                                                                                                                                                                                                                                                                                                                                                                                                                                                                                                                                                                                                                                                                                                                                                                                                                                                                                                                                                                                                                                                      | San Diego County Public Health Laboratory                                         | Andersen lab at Scripps Research                                           | SEARCH Alliance San Diego with Tracy Basler, Jovan Shephard, Brett Austin                                                                                                                                                                                                                                                                                                                 |
| EPI_ISL_730621                                                                                                                                                                                                                                                                                                                                                                                                                                                                                                                                                                                                                                                                                                                                                                                                                                                                                                                                                                                                                                                                                                                                                                                                                                                                                                                                                                                                                                                                                                                                                                                                                                                                                                                                                                                                                                                                                                                 | Limmattal Hospital                                                                | Institute of Medical Virology, University of Zurich                        | Stefan Schmutz, Verena Kufner, Maryam Zaheri, Gabriela Ziltener, Jürg Böni, Michael Huber, Alexandra Trkola                                                                                                                                                                                                                                                                               |
| EPI_ISL_730622, EPI_ISL_730626, EPI_ISL_730627                                                                                                                                                                                                                                                                                                                                                                                                                                                                                                                                                                                                                                                                                                                                                                                                                                                                                                                                                                                                                                                                                                                                                                                                                                                                                                                                                                                                                                                                                                                                                                                                                                                                                                                                                                                                                                                                                 | Männedorf Hospital                                                                | Institute of Medical Virology, University of Zurich                        | Stefan Schmutz, Verena Kufner, Maryam Zaheri, Gabriela Ziltener, Jürg Böni, Michael Huber, Alexandra Trkola                                                                                                                                                                                                                                                                               |
| EPI_ISL_730630                                                                                                                                                                                                                                                                                                                                                                                                                                                                                                                                                                                                                                                                                                                                                                                                                                                                                                                                                                                                                                                                                                                                                                                                                                                                                                                                                                                                                                                                                                                                                                                                                                                                                                                                                                                                                                                                                                                 | Limmattal Hospital                                                                | Institute of Medical Virology, University of Zurich                        | Stefan Schmutz, Verena Kufner, Maryam Zaheri, Gabriela Ziltener, Jürg Böni, Michael Huber, Alexandra Trkola                                                                                                                                                                                                                                                                               |
| EPI_ISL_730631                                                                                                                                                                                                                                                                                                                                                                                                                                                                                                                                                                                                                                                                                                                                                                                                                                                                                                                                                                                                                                                                                                                                                                                                                                                                                                                                                                                                                                                                                                                                                                                                                                                                                                                                                                                                                                                                                                                 | Männedorf Hospital                                                                | Institute of Medical Virology, University of Zurich                        | Stefan Schmutz, Verena Kufner, Maryam Zaheri, Gabriela Ziltener, Jürg Böni, Michael Huber, Alexandra Trkola                                                                                                                                                                                                                                                                               |
| EPI_ISL_730634                                                                                                                                                                                                                                                                                                                                                                                                                                                                                                                                                                                                                                                                                                                                                                                                                                                                                                                                                                                                                                                                                                                                                                                                                                                                                                                                                                                                                                                                                                                                                                                                                                                                                                                                                                                                                                                                                                                 | University Hospital Zürich                                                        | Institute of Medical Virology, University of Zurich                        | Stefan Schmutz, Verena Kufner, Maryam Zaheri, Gabriela Ziltener, Jürg Böni, Michael Huber, Alexandra Trkola                                                                                                                                                                                                                                                                               |
| EPI_ISL_730635                                                                                                                                                                                                                                                                                                                                                                                                                                                                                                                                                                                                                                                                                                                                                                                                                                                                                                                                                                                                                                                                                                                                                                                                                                                                                                                                                                                                                                                                                                                                                                                                                                                                                                                                                                                                                                                                                                                 | Limmattal Hospital                                                                | Institute of Medical Virology, University of Zurich                        | Stefan Schmutz, Verena Kufner, Maryam Zaheri, Gabriela Ziltener, Jürg Böni, Michael Huber, Alexandra Trkola                                                                                                                                                                                                                                                                               |
| EPI_ISL_730637, EPI_ISL_730638, EPI_ISL_730639                                                                                                                                                                                                                                                                                                                                                                                                                                                                                                                                                                                                                                                                                                                                                                                                                                                                                                                                                                                                                                                                                                                                                                                                                                                                                                                                                                                                                                                                                                                                                                                                                                                                                                                                                                                                                                                                                 | Männedorf Hospital                                                                | Institute of Medical Virology, University of Zurich                        | Stefan Schmutz, Verena Kufner, Maryam Zaheri, Gabriela Ziltener, Jürg Böni, Michael Huber, Alexandra Trkola                                                                                                                                                                                                                                                                               |
| EPI_ISL_730654                                                                                                                                                                                                                                                                                                                                                                                                                                                                                                                                                                                                                                                                                                                                                                                                                                                                                                                                                                                                                                                                                                                                                                                                                                                                                                                                                                                                                                                                                                                                                                                                                                                                                                                                                                                                                                                                                                                 | Lighthouse Lab in Alderley Park                                                   | Wellcome Sanger Institute for the COVID-19 Genomics UK (COG-UK) Consortium | Jacquelyn Wynn, Mairead Hyland, The Lighthouse Lab in Alderley Park and Alex Alderton, Roberto Amato, Sonia Goncalves, Ewan Harrison, David K. Jackson, Ian Johnston, Dominic Kwiatkowski, Cordelia Langford, John Sillitoe on behalf of the Wellcome Sanger Institute COVID-19 Surveillance Team                                                                                         |
| EPI_ISL_730656, EPI_ISL_730657, EPI_ISL_730659                                                                                                                                                                                                                                                                                                                                                                                                                                                                                                                                                                                                                                                                                                                                                                                                                                                                                                                                                                                                                                                                                                                                                                                                                                                                                                                                                                                                                                                                                                                                                                                                                                                                                                                                                                                                                                                                                 | Lighthouse Lab in Glasgow                                                         | Wellcome Sanger Institute for the COVID-19 Genomics UK (COG-UK) Consortium | Harper VanSteenhouse, Yumi Kasai, David Gray, Carol Clugston, Anna Dominiczak and Alex Alderton, Roberto Amato, Sonia Goncalves, Ewan Harrison, David K. Jackson, Ian Johnston, Dominic Kwiatkowski, Cordelia Langford, John Sillitoe on behalf of the Wellcome Sanger Institute COVID-19 Surveillance Team                                                                               |
| EPI_ISL_730660, EPI_ISL_730662                                                                                                                                                                                                                                                                                                                                                                                                                                                                                                                                                                                                                                                                                                                                                                                                                                                                                                                                                                                                                                                                                                                                                                                                                                                                                                                                                                                                                                                                                                                                                                                                                                                                                                                                                                                                                                                                                                 | Lighthouse Lab in Alderley Park                                                   | Wellcome Sanger Institute for the COVID-19 Genomics UK (COG-UK) Consortium | Jacquelyn Wynn, Mairead Hyland, The Lighthouse Lab in Alderley Park and Alex Alderton, Roberto Amato, Sonia Goncalves, Ewan Harrison, David K. Jackson, Ian Johnston, Dominic Kwiatkowski, Cordelia Langford, John Sillitoe on behalf of the Wellcome Sanger Institute COVID-19 Surveillance Team                                                                                         |
| EPI_ISL_730664                                                                                                                                                                                                                                                                                                                                                                                                                                                                                                                                                                                                                                                                                                                                                                                                                                                                                                                                                                                                                                                                                                                                                                                                                                                                                                                                                                                                                                                                                                                                                                                                                                                                                                                                                                                                                                                                                                                 | Lighthouse Lab in Glasgow                                                         | Wellcome Sanger Institute for the COVID-19 Genomics UK (COG-UK) Consortium | Harper VanSteenhouse, Yumi Kasai, David Gray, Carol Clugston, Anna Dominiczak and Alex Alderton, Roberto Amato, Sonia Goncalves, Ewan Harrison, David K. Jackson, Ian Johnston, Dominic Kwiatkowski, Cordelia Langford, John Sillitoe on behalf of the Wellcome Sanger Institute COVID-19 Surveillance Team                                                                               |
| EPI_ISL_730665, EPI_ISL_730669, EPI_ISL_730670, EPI_ISL_730671, EPI_ISL_730672                                                                                                                                                                                                                                                                                                                                                                                                                                                                                                                                                                                                                                                                                                                                                                                                                                                                                                                                                                                                                                                                                                                                                                                                                                                                                                                                                                                                                                                                                                                                                                                                                                                                                                                                                                                                                                                 | Lighthouse Lab in Alderley Park                                                   | Wellcome Sanger Institute for the COVID-19 Genomics UK (COG-UK) Consortium | Jacquelyn Wynn, Mairead Hyland, The Lighthouse Lab in Alderley Park and Alex Alderton, Roberto Amato, Sonia Goncalves, Ewan Harrison, David K. Jackson, Ian Johnston, Dominic Kwiatkowski, Cordelia Langford, John Sillitoe on behalf of the Wellcome Sanger Institute COVID-19 Surveillance Team                                                                                         |
| EPI_ISL_730673                                                                                                                                                                                                                                                                                                                                                                                                                                                                                                                                                                                                                                                                                                                                                                                                                                                                                                                                                                                                                                                                                                                                                                                                                                                                                                                                                                                                                                                                                                                                                                                                                                                                                                                                                                                                                                                                                                                 | Lighthouse Lab in Glasgow                                                         | Wellcome Sanger Institute for the COVID-19 Genomics UK (COG-UK) Consortium | Harper VanSteenhouse, Yumi Kasai, David Gray, Carol Clugston, Anna Dominiczak and Alex Alderton, Roberto Amato, Sonia Goncalves, Ewan Harrison, David K. Jackson, Ian Johnston, Dominic Kwiatkowski, Cordelia Langford, John Sillitoe on behalf of the Wellcome Sanger Institute COVID-19 Surveillance Team                                                                               |
| EPI_ISL_730674                                                                                                                                                                                                                                                                                                                                                                                                                                                                                                                                                                                                                                                                                                                                                                                                                                                                                                                                                                                                                                                                                                                                                                                                                                                                                                                                                                                                                                                                                                                                                                                                                                                                                                                                                                                                                                                                                                                 | Lighthouse Lab in Alderley Park                                                   | Wellcome Sanger Institute for the COVID-19 Genomics UK (COG-UK) Consortium | Jacquelyn Wynn, Mairead Hyland, The Lighthouse Lab in Alderley Park and Alex Alderton, Roberto Amato, Sonia Goncalves, Ewan Harrison, David K. Jackson, Ian Johnston, Dominic Kwiatkowski, Cordelia Langford, John Sillitoe on behalf of the Wellcome Sanger Institute COVID-19 Surveillance Team                                                                                         |
| EPI_ISL_730676                                                                                                                                                                                                                                                                                                                                                                                                                                                                                                                                                                                                                                                                                                                                                                                                                                                                                                                                                                                                                                                                                                                                                                                                                                                                                                                                                                                                                                                                                                                                                                                                                                                                                                                                                                                                                                                                                                                 | Lighthouse Lab in Glasgow                                                         | Wellcome Sanger Institute for the COVID-19 Genomics UK (COG-UK) Consortium | Harper VanSteenhouse, Yumi Kasai, David Gray, Carol Clugston, Anna Dominiczak and Alex Alderton, Roberto Amato, Sonia Goncalves, Ewan Harrison, David K. Jackson, Ian Johnston, Dominic Kwiatkowski, Cordelia Langford, John Sillitoe on behalf of the Wellcome Sanger Institute COVID-19 Surveillance Team                                                                               |
| EPI_ISL_730677                                                                                                                                                                                                                                                                                                                                                                                                                                                                                                                                                                                                                                                                                                                                                                                                                                                                                                                                                                                                                                                                                                                                                                                                                                                                                                                                                                                                                                                                                                                                                                                                                                                                                                                                                                                                                                                                                                                 | Lighthouse Lab in Alderley Park                                                   | Wellcome Sanger Institute for the COVID-19 Genomics UK (COG-UK) Consortium | Jacquelyn Wynn, Mairead Hyland, The Lighthouse Lab in Alderley Park and Alex Alderton, Roberto Amato, Sonia Goncalves, Ewan Harrison, David K. Jackson, Ian Johnston, Dominic Kwiatkowski, Cordelia Langford, John Sillitoe on behalf of the Wellcome Sanger Institute COVID-19 Surveillance Team                                                                                         |
| EPI_ISL_730678                                                                                                                                                                                                                                                                                                                                                                                                                                                                                                                                                                                                                                                                                                                                                                                                                                                                                                                                                                                                                                                                                                                                                                                                                                                                                                                                                                                                                                                                                                                                                                                                                                                                                                                                                                                                                                                                                                                 | Lighthouse Lab in Glasgow                                                         | Wellcome Sanger Institute for the COVID-19 Genomics UK (COG-UK) Consortium | Harper VanSteenhouse, Yumi Kasai, David Gray, Carol Clugston, Anna Dominiczak and Alex Alderton, Roberto Amato, Sonia Goncalves, Ewan Harrison, David K. Jackson, Ian Johnston, Dominic Kwiatkowski, Cordelia Langford, John Sillitoe on behalf of the Wellcome Sanger Institute COVID-19 Surveillance Team                                                                               |
| EPI_ISL_730680, EPI_ISL_730681, EPI_ISL_730682, EPI_ISL_730683, EPI_ISL_730684                                                                                                                                                                                                                                                                                                                                                                                                                                                                                                                                                                                                                                                                                                                                                                                                                                                                                                                                                                                                                                                                                                                                                                                                                                                                                                                                                                                                                                                                                                                                                                                                                                                                                                                                                                                                                                                 | Lighthouse Lab in Alderley Park                                                   | Wellcome Sanger Institute for the COVID-19 Genomics UK (COG-UK) Consortium | Jacquelyn Wynn, Mairead Hyland, The Lighthouse Lab in Alderley Park and Alex Alderton, Roberto Amato, Sonia Goncalves, Ewan Harrison, David K. Jackson, Ian Johnston, Dominic Kwiatkowski, Cordelia Langford, John Sillitoe on behalf of the Wellcome Sanger Institute COVID-19 Surveillance Team                                                                                         |
| EPI_ISL_730685                                                                                                                                                                                                                                                                                                                                                                                                                                                                                                                                                                                                                                                                                                                                                                                                                                                                                                                                                                                                                                                                                                                                                                                                                                                                                                                                                                                                                                                                                                                                                                                                                                                                                                                                                                                                                                                                                                                 | Lighthouse Lab in Glasgow                                                         | Wellcome Sanger Institute for the COVID-19 Genomics UK (COG-UK) Consortium | Harper VanSteenhouse, Yumi Kasai, David Gray, Carol Clugston, Anna Dominiczak and Alex Alderton, Roberto Amato, Sonia Goncalves, Ewan Harrison, David K. Jackson, Ian Johnston, Dominic Kwiatkowski, Cordelia Langford, John Sillitoe on behalf of the Wellcome Sanger Institute COVID-19 Surveillance Team                                                                               |
| EPI_ISL_730686, EPI_ISL_730687,                                                                                                                                                                                                                                                                                                                                                                                                                                                                                                                                                                                                                                                                                                                                                                                                                                                                                                                                                                                                                                                                                                                                                                                                                                                                                                                                                                                                                                                                                                                                                                                                                                                                                                                                                                                                                                                                                                | Lighthouse Lab in Alderley Park                                                   | Wellcome Sanger Institute for the COVID-19 Genomics UK                     | Jacquelyn Wynn, Mairead Hyland, The Lighthouse Lab in Alderley Park and Alex Alderton, Roberto Amato, Sonia Goncalves, Ewan Harrison, David K.                                                                                                                                                                                                                                            |



[illegible]

[illegible]

David K. Jackson, Ian Johnston, Dominic Kwiatkowski, Cordelia Langford, John Sillitoe on behalf of the Wellcome Sanger Institute COVID-19 Surveillance Team

[illegible]

[illegible]

[illegible]

|                                                                                |                                                                                                                                                                       |                                                                                                                                                                                                                                                                                                                                                                          |                                                                                                                                                                                                                                                                                                                                                                                                                                                                                                                                                                                                          |
|--------------------------------------------------------------------------------|-----------------------------------------------------------------------------------------------------------------------------------------------------------------------|--------------------------------------------------------------------------------------------------------------------------------------------------------------------------------------------------------------------------------------------------------------------------------------------------------------------------------------------------------------------------|----------------------------------------------------------------------------------------------------------------------------------------------------------------------------------------------------------------------------------------------------------------------------------------------------------------------------------------------------------------------------------------------------------------------------------------------------------------------------------------------------------------------------------------------------------------------------------------------------------|
| see above                                                                      | Department of Virology and Immunology, University of Helsinki and Helsinki University Hospital, Huslab Finland                                                        | Department of Virology, Faculty of Medicine, University of Helsinki, Helsinki, Finland                                                                                                                                                                                                                                                                                   | Teemu Smura, Ravi Kant, Phuoc Truong, Hussein Alburkat, Hannimari Kallio-Kokko, Jenni Virtanen, Maija Suvanto, Sari Hannula, Harri Kangas, Pekka Ellonen, Olli Vapalahti                                                                                                                                                                                                                                                                                                                                                                                                                                 |
| EPI_ISL_732656                                                                 | Narhalsan Fjällbacka VC                                                                                                                                               | The Public Health Agency of Sweden                                                                                                                                                                                                                                                                                                                                       | Department of Microbiology, The Public Health Agency of Sweden                                                                                                                                                                                                                                                                                                                                                                                                                                                                                                                                           |
| EPI_ISL_732657                                                                 | Barnakuten                                                                                                                                                            | The Public Health Agency of Sweden                                                                                                                                                                                                                                                                                                                                       | Department of Microbiology, The Public Health Agency of Sweden                                                                                                                                                                                                                                                                                                                                                                                                                                                                                                                                           |
| EPI_ISL_732964, EPI_ISL_732967                                                 | LabPLUS                                                                                                                                                               | Institute of Environmental Science and Research (ESR)                                                                                                                                                                                                                                                                                                                    | Xiaoyun Ren, Matt Storey, Nikki Freed, Muhammad Faisal, Jing Wang, Hermes Perez, Anja Werno, Antje van der Linden, Arlo Upton, Chris Mansell, David Hammer, Dragana Drinkovic, Gary McAuliffe, Hana Sofia Andersson, James Ussher, Jill Sherwood, Josh Freeman, Julia Howard, Juliet Elvy, Mary DeAlmeida, Matt Blakiston, Matthew Rogers, Max Bloomfield, Michael Addidle, Michelle Balm, Sally Roberts, Sarah Jefferies, Sharmini Muttaiyah, Susan Morpeth, Susan Taylor, Timothy Blackmore, Vani Sathyendran, Veronica Playle, Virginia Hope, Erasmus Smit, Lauren Jelly, Olin Silander, Joep de Ligt |
| EPI_ISL_733499                                                                 | 1-Laboratory of Microbiology, National Reference Lab, Charles Nicolle Hospital; 2-University of Tunis ElManar, Faculty of Medicine of Tunis, LR99ES09, Tunis, Tunisia | 1-Clinical and Experimental Pharmacology Lab, LR16SP02, National Center of Pharmacovigilance, University of Tunis El Manar, Tunis, Tunisia. 2-Neurodegenerative diseases and psychiatric troubles, LR18SP03, Razi Hospital, University of Tunis El Manar, Tunis, Tunisia. 3- Ministry of Health, National Observatory of New and Emerging Diseases, 1006, Tunis, Tunisia | Ilhem Boutiba-Ben Boubaker, Sameh Trabelsi, Nissaf Ben Alaya, Maher Kharrat, Alia Ben Kahla, Jalila Ben Khellil, Salma Abid, Sana Ferjani, Mouna Ben Sassi, Mouna Safer, Guedi Ali Barreh, Habiba Ben Romdhane, Souissi Amira, Sarra Chamman, Hanen El Jebari, Asma Ferjani, Gaies Emna, Riadh Daghfous, Riadh Gouider.                                                                                                                                                                                                                                                                                  |
| EPI_ISL_733572, EPI_ISL_733573, EPI_ISL_733575                                 | Temporary Specimen Collection Centre                                                                                                                                  | Hong Kong Department of Health                                                                                                                                                                                                                                                                                                                                           | Alan K.L. Tsang, Peter C.W. Yip, Edman T.K. Lam, Rickjason C.W. Chan, Dominic N.C. Tsang                                                                                                                                                                                                                                                                                                                                                                                                                                                                                                                 |
| EPI_ISL_733593                                                                 | Respiratory Virus Unit, National Infection Service, Public Health England                                                                                             | COVID-19 Genomics UK (COG-UK) Consortium                                                                                                                                                                                                                                                                                                                                 | PHE Covid Sequencing Team                                                                                                                                                                                                                                                                                                                                                                                                                                                                                                                                                                                |
| EPI_ISL_733598                                                                 | Lighthouse Lab in Alderley Park                                                                                                                                       | Wellcome Sanger Institute for the COVID-19 Genomics UK (COG-UK) Consortium                                                                                                                                                                                                                                                                                               | Jacquelyn Wynn, Mairead Hyland, The Lighthouse Lab in Alderley Park and Alex Alderton, Roberto Amato, Sonia Goncalves, Ewan Harrison, David K. Jackson, Ian Johnston, Dominic Kwiatkowski, Cordelia Langford, John Sillitoe on behalf of the Wellcome Sanger Institute COVID-19 Surveillance Team                                                                                                                                                                                                                                                                                                        |
| EPI_ISL_733599, EPI_ISL_733601                                                 | Lighthouse Lab in Cambridge                                                                                                                                           | Wellcome Sanger Institute for the COVID-19 Genomics UK (COG-UK) Consortium                                                                                                                                                                                                                                                                                               | Rob Howes, The Lighthouse Lab in Cambridge and Alex Alderton, Roberto Amato, Sonia Goncalves, Ewan Harrison, David K. Jackson, Ian Johnston, Dominic Kwiatkowski, Cordelia Langford, John Sillitoe on behalf of the Wellcome Sanger Institute COVID-19 Surveillance Team                                                                                                                                                                                                                                                                                                                                 |
| EPI_ISL_733603                                                                 | Lighthouse Lab in Alderley Park                                                                                                                                       | Wellcome Sanger Institute for the COVID-19 Genomics UK (COG-UK) Consortium                                                                                                                                                                                                                                                                                               | Jacquelyn Wynn, Mairead Hyland, The Lighthouse Lab in Alderley Park and Alex Alderton, Roberto Amato, Sonia Goncalves, Ewan Harrison, David K. Jackson, Ian Johnston, Dominic Kwiatkowski, Cordelia Langford, John Sillitoe on behalf of the Wellcome Sanger Institute COVID-19 Surveillance Team                                                                                                                                                                                                                                                                                                        |
| EPI_ISL_733604                                                                 | Lighthouse Lab in Cambridge                                                                                                                                           | Wellcome Sanger Institute for the COVID-19 Genomics UK (COG-UK) Consortium                                                                                                                                                                                                                                                                                               | Rob Howes, The Lighthouse Lab in Cambridge and Alex Alderton, Roberto Amato, Sonia Goncalves, Ewan Harrison, David K. Jackson, Ian Johnston, Dominic Kwiatkowski, Cordelia Langford, John Sillitoe on behalf of the Wellcome Sanger Institute COVID-19 Surveillance Team                                                                                                                                                                                                                                                                                                                                 |
| EPI_ISL_733607                                                                 | Lighthouse Lab in Milton Keynes                                                                                                                                       | Wellcome Sanger Institute for the COVID-19 Genomics UK (COG-UK) Consortium                                                                                                                                                                                                                                                                                               | The Lighthouse Lab in Milton Keynes and Alex Alderton, Roberto Amato, Sonia Goncalves, Ewan Harrison, David K. Jackson, Ian Johnston, Dominic Kwiatkowski, Cordelia Langford, John Sillitoe on behalf of the Wellcome Sanger Institute COVID-19 Surveillance Team                                                                                                                                                                                                                                                                                                                                        |
| EPI_ISL_733610                                                                 | Lighthouse Lab in Cambridge                                                                                                                                           | Wellcome Sanger Institute for the COVID-19 Genomics UK (COG-UK) Consortium                                                                                                                                                                                                                                                                                               | Rob Howes, The Lighthouse Lab in Cambridge and Alex Alderton, Roberto Amato, Sonia Goncalves, Ewan Harrison, David K. Jackson, Ian Johnston, Dominic Kwiatkowski, Cordelia Langford, John Sillitoe on behalf of the Wellcome Sanger Institute COVID-19 Surveillance Team                                                                                                                                                                                                                                                                                                                                 |
| EPI_ISL_733611, EPI_ISL_733613                                                 | Lighthouse Lab in Alderley Park                                                                                                                                       | Wellcome Sanger Institute for the COVID-19 Genomics UK (COG-UK) Consortium                                                                                                                                                                                                                                                                                               | Jacquelyn Wynn, Mairead Hyland, The Lighthouse Lab in Alderley Park and Alex Alderton, Roberto Amato, Sonia Goncalves, Ewan Harrison, David K. Jackson, Ian Johnston, Dominic Kwiatkowski, Cordelia Langford, John Sillitoe on behalf of the Wellcome Sanger Institute COVID-19 Surveillance Team                                                                                                                                                                                                                                                                                                        |
| EPI_ISL_733614                                                                 | Lighthouse Lab in Cambridge                                                                                                                                           | Wellcome Sanger Institute for the COVID-19 Genomics UK (COG-UK) Consortium                                                                                                                                                                                                                                                                                               | Rob Howes, The Lighthouse Lab in Cambridge and Alex Alderton, Roberto Amato, Sonia Goncalves, Ewan Harrison, David K. Jackson, Ian Johnston, Dominic Kwiatkowski, Cordelia Langford, John Sillitoe on behalf of the Wellcome Sanger Institute COVID-19 Surveillance Team                                                                                                                                                                                                                                                                                                                                 |
| EPI_ISL_733617                                                                 | Lighthouse Lab in Milton Keynes                                                                                                                                       | Wellcome Sanger Institute for the COVID-19 Genomics UK (COG-UK) Consortium                                                                                                                                                                                                                                                                                               | The Lighthouse Lab in Milton Keynes and Alex Alderton, Roberto Amato, Sonia Goncalves, Ewan Harrison, David K. Jackson, Ian Johnston, Dominic Kwiatkowski, Cordelia Langford, John Sillitoe on behalf of the Wellcome Sanger Institute COVID-19 Surveillance Team                                                                                                                                                                                                                                                                                                                                        |
| EPI_ISL_733618                                                                 | Lighthouse Lab in Alderley Park                                                                                                                                       | Wellcome Sanger Institute for the COVID-19 Genomics UK (COG-UK) Consortium                                                                                                                                                                                                                                                                                               | Jacquelyn Wynn, Mairead Hyland, The Lighthouse Lab in Alderley Park and Alex Alderton, Roberto Amato, Sonia Goncalves, Ewan Harrison, David K. Jackson, Ian Johnston, Dominic Kwiatkowski, Cordelia Langford, John Sillitoe on behalf of the Wellcome Sanger Institute COVID-19 Surveillance Team                                                                                                                                                                                                                                                                                                        |
| EPI_ISL_733619                                                                 | Lighthouse Lab in Cambridge                                                                                                                                           | Wellcome Sanger Institute for the COVID-19 Genomics UK (COG-UK) Consortium                                                                                                                                                                                                                                                                                               | Rob Howes, The Lighthouse Lab in Cambridge and Alex Alderton, Roberto Amato, Sonia Goncalves, Ewan Harrison, David K. Jackson, Ian Johnston, Dominic Kwiatkowski, Cordelia Langford, John Sillitoe on behalf of the Wellcome Sanger Institute COVID-19 Surveillance Team                                                                                                                                                                                                                                                                                                                                 |
| EPI_ISL_733621                                                                 | Lighthouse Lab in Alderley Park                                                                                                                                       | Wellcome Sanger Institute for the COVID-19 Genomics UK (COG-UK) Consortium                                                                                                                                                                                                                                                                                               | Jacquelyn Wynn, Mairead Hyland, The Lighthouse Lab in Alderley Park and Alex Alderton, Roberto Amato, Sonia Goncalves, Ewan Harrison, David K. Jackson, Ian Johnston, Dominic Kwiatkowski, Cordelia Langford, John Sillitoe on behalf of the Wellcome Sanger Institute COVID-19 Surveillance Team                                                                                                                                                                                                                                                                                                        |
| EPI_ISL_733622, EPI_ISL_733624, EPI_ISL_733626, EPI_ISL_733627                 | Lighthouse Lab in Cambridge                                                                                                                                           | Wellcome Sanger Institute for the COVID-19 Genomics UK (COG-UK) Consortium                                                                                                                                                                                                                                                                                               | Rob Howes, The Lighthouse Lab in Cambridge and Alex Alderton, Roberto Amato, Sonia Goncalves, Ewan Harrison, David K. Jackson, Ian Johnston, Dominic Kwiatkowski, Cordelia Langford, John Sillitoe on behalf of the Wellcome Sanger Institute COVID-19 Surveillance Team                                                                                                                                                                                                                                                                                                                                 |
| EPI_ISL_733628                                                                 | Lighthouse Lab in Milton Keynes                                                                                                                                       | Wellcome Sanger Institute for the COVID-19 Genomics UK (COG-UK) Consortium                                                                                                                                                                                                                                                                                               | The Lighthouse Lab in Milton Keynes and Alex Alderton, Roberto Amato, Sonia Goncalves, Ewan Harrison, David K. Jackson, Ian Johnston, Dominic Kwiatkowski, Cordelia Langford, John Sillitoe on behalf of the Wellcome Sanger Institute COVID-19 Surveillance Team                                                                                                                                                                                                                                                                                                                                        |
| EPI_ISL_733629, EPI_ISL_733631, EPI_ISL_733632, EPI_ISL_733633                 | Lighthouse Lab in Cambridge                                                                                                                                           | Wellcome Sanger Institute for the COVID-19 Genomics UK (COG-UK) Consortium                                                                                                                                                                                                                                                                                               | Rob Howes, The Lighthouse Lab in Cambridge and Alex Alderton, Roberto Amato, Sonia Goncalves, Ewan Harrison, David K. Jackson, Ian Johnston, Dominic Kwiatkowski, Cordelia Langford, John Sillitoe on behalf of the Wellcome Sanger Institute COVID-19 Surveillance Team                                                                                                                                                                                                                                                                                                                                 |
| EPI_ISL_733636                                                                 | Lighthouse Lab in Milton Keynes                                                                                                                                       | Wellcome Sanger Institute for the COVID-19 Genomics UK (COG-UK) Consortium                                                                                                                                                                                                                                                                                               | The Lighthouse Lab in Milton Keynes and Alex Alderton, Roberto Amato, Sonia Goncalves, Ewan Harrison, David K. Jackson, Ian Johnston, Dominic Kwiatkowski, Cordelia Langford, John Sillitoe on behalf of the Wellcome Sanger Institute COVID-19 Surveillance Team                                                                                                                                                                                                                                                                                                                                        |
| EPI_ISL_733637, EPI_ISL_733640                                                 | Lighthouse Lab in Cambridge                                                                                                                                           | Wellcome Sanger Institute for the COVID-19 Genomics UK (COG-UK) Consortium                                                                                                                                                                                                                                                                                               | Rob Howes, The Lighthouse Lab in Cambridge and Alex Alderton, Roberto Amato, Sonia Goncalves, Ewan Harrison, David K. Jackson, Ian Johnston, Dominic Kwiatkowski, Cordelia Langford, John Sillitoe on behalf of the Wellcome Sanger Institute COVID-19 Surveillance Team                                                                                                                                                                                                                                                                                                                                 |
| EPI_ISL_733641, EPI_ISL_733643                                                 | Lighthouse Lab in Alderley Park                                                                                                                                       | Wellcome Sanger Institute for the COVID-19 Genomics UK (COG-UK) Consortium                                                                                                                                                                                                                                                                                               | Jacquelyn Wynn, Mairead Hyland, The Lighthouse Lab in Alderley Park and Alex Alderton, Roberto Amato, Sonia Goncalves, Ewan Harrison, David K. Jackson, Ian Johnston, Dominic Kwiatkowski, Cordelia Langford, John Sillitoe on behalf of the Wellcome Sanger Institute COVID-19 Surveillance Team                                                                                                                                                                                                                                                                                                        |
| EPI_ISL_733644, EPI_ISL_733648                                                 | Lighthouse Lab in Milton Keynes                                                                                                                                       | Wellcome Sanger Institute for the COVID-19 Genomics UK (COG-UK) Consortium                                                                                                                                                                                                                                                                                               | The Lighthouse Lab in Milton Keynes and Alex Alderton, Roberto Amato, Sonia Goncalves, Ewan Harrison, David K. Jackson, Ian Johnston, Dominic Kwiatkowski, Cordelia Langford, John Sillitoe on behalf of the Wellcome Sanger Institute COVID-19 Surveillance Team                                                                                                                                                                                                                                                                                                                                        |
| EPI_ISL_733649, EPI_ISL_733650, EPI_ISL_733655                                 | Lighthouse Lab in Cambridge                                                                                                                                           | Wellcome Sanger Institute for the COVID-19 Genomics UK (COG-UK) Consortium                                                                                                                                                                                                                                                                                               | Rob Howes, The Lighthouse Lab in Cambridge and Alex Alderton, Roberto Amato, Sonia Goncalves, Ewan Harrison, David K. Jackson, Ian Johnston, Dominic Kwiatkowski, Cordelia Langford, John Sillitoe on behalf of the Wellcome Sanger Institute COVID-19 Surveillance Team                                                                                                                                                                                                                                                                                                                                 |
| EPI_ISL_733657                                                                 | Lighthouse Lab in Milton Keynes                                                                                                                                       | Wellcome Sanger Institute for the COVID-19 Genomics UK (COG-UK) Consortium                                                                                                                                                                                                                                                                                               | The Lighthouse Lab in Milton Keynes and Alex Alderton, Roberto Amato, Sonia Goncalves, Ewan Harrison, David K. Jackson, Ian Johnston, Dominic Kwiatkowski, Cordelia Langford, John Sillitoe on behalf of the Wellcome Sanger Institute COVID-19 Surveillance Team                                                                                                                                                                                                                                                                                                                                        |
| EPI_ISL_733660, EPI_ISL_733661, EPI_ISL_733662, EPI_ISL_733663, EPI_ISL_733665 | Lighthouse Lab in Cambridge                                                                                                                                           | Wellcome Sanger Institute for the COVID-19 Genomics UK (COG-UK) Consortium                                                                                                                                                                                                                                                                                               | Rob Howes, The Lighthouse Lab in Cambridge and Alex Alderton, Roberto Amato, Sonia Goncalves, Ewan Harrison, David K. Jackson, Ian Johnston, Dominic Kwiatkowski, Cordelia Langford, John Sillitoe on behalf of the Wellcome Sanger Institute COVID-19 Surveillance Team                                                                                                                                                                                                                                                                                                                                 |
| EPI_ISL_733666                                                                 | Lighthouse Lab in Milton Keynes                                                                                                                                       | Wellcome Sanger Institute for the COVID-19 Genomics UK (COG-UK) Consortium                                                                                                                                                                                                                                                                                               | The Lighthouse Lab in Milton Keynes and Alex Alderton, Roberto Amato, Sonia Goncalves, Ewan Harrison, David K. Jackson, Ian Johnston, Dominic Kwiatkowski, Cordelia Langford, John Sillitoe on behalf of the Wellcome Sanger Institute COVID-19 Surveillance Team                                                                                                                                                                                                                                                                                                                                        |
| EPI_ISL_733668                                                                 | Lighthouse Lab in Cambridge                                                                                                                                           | Wellcome Sanger Institute for the COVID-19 Genomics UK (COG-UK) Consortium                                                                                                                                                                                                                                                                                               | Rob Howes, The Lighthouse Lab in Cambridge and Alex Alderton, Roberto Amato, Sonia Goncalves, Ewan Harrison, David K. Jackson, Ian Johnston, Dominic Kwiatkowski, Cordelia Langford, John Sillitoe on behalf of the Wellcome Sanger Institute COVID-19 Surveillance Team                                                                                                                                                                                                                                                                                                                                 |
| EPI_ISL_733669                                                                 | Lighthouse Lab in Milton Keynes                                                                                                                                       | Wellcome Sanger Institute for the COVID-19 Genomics UK (COG-UK) Consortium                                                                                                                                                                                                                                                                                               | The Lighthouse Lab in Milton Keynes and Alex Alderton, Roberto Amato, Sonia Goncalves, Ewan Harrison, David K. Jackson, Ian Johnston, Dominic Kwiatkowski, Cordelia Langford, John Sillitoe on behalf of the Wellcome Sanger Institute COVID-19 Surveillance Team                                                                                                                                                                                                                                                                                                                                        |
| EPI_ISL_733670, EPI_ISL_733671, EPI_ISL_733672                                 | Lighthouse Lab in Cambridge                                                                                                                                           | Wellcome Sanger Institute for the COVID-19 Genomics UK (COG-UK) Consortium                                                                                                                                                                                                                                                                                               | Rob Howes, The Lighthouse Lab in Cambridge and Alex Alderton, Roberto Amato, Sonia Goncalves, Ewan Harrison, David K. Jackson, Ian Johnston, Dominic Kwiatkowski, Cordelia Langford, John Sillitoe on behalf of the Wellcome Sanger Institute COVID-19 Surveillance Team                                                                                                                                                                                                                                                                                                                                 |

[illegible]



[illegible]

[illegible]

|                                                                                                                                                                                                                                                                                                                                                                                                                                                                                                                                                                                                                                                                                                                                                                                                                                                                                                                                                                                                                                                                                                                                                                                                                                                                                                                                                                                                                                                                                                                                                                                                                                                                                                                                                                                                                                                                                                                                                                                                                                                                                                                                                                                                                                                                                                                                                                                                                                                                                                                                                                                                                                                                                                                                                                                                                                                                                                                                                                                                                                                                                                                                                                                                                                                                                                                                                                                                                                                                                                                                                                                                                                                                                                                                                                                                                                                                                                                                                                                                                                                                                                                                                                                                                                                                                                                                                                                                                                                                                                                                                                                                                                                                                                                                                                                                                                                                                                                                                                                                                                                                                                                                                                                                                                                                |           |                                 |                                                                            |                                                                                                                                                                                                                                                                                                             |
|----------------------------------------------------------------------------------------------------------------------------------------------------------------------------------------------------------------------------------------------------------------------------------------------------------------------------------------------------------------------------------------------------------------------------------------------------------------------------------------------------------------------------------------------------------------------------------------------------------------------------------------------------------------------------------------------------------------------------------------------------------------------------------------------------------------------------------------------------------------------------------------------------------------------------------------------------------------------------------------------------------------------------------------------------------------------------------------------------------------------------------------------------------------------------------------------------------------------------------------------------------------------------------------------------------------------------------------------------------------------------------------------------------------------------------------------------------------------------------------------------------------------------------------------------------------------------------------------------------------------------------------------------------------------------------------------------------------------------------------------------------------------------------------------------------------------------------------------------------------------------------------------------------------------------------------------------------------------------------------------------------------------------------------------------------------------------------------------------------------------------------------------------------------------------------------------------------------------------------------------------------------------------------------------------------------------------------------------------------------------------------------------------------------------------------------------------------------------------------------------------------------------------------------------------------------------------------------------------------------------------------------------------------------------------------------------------------------------------------------------------------------------------------------------------------------------------------------------------------------------------------------------------------------------------------------------------------------------------------------------------------------------------------------------------------------------------------------------------------------------------------------------------------------------------------------------------------------------------------------------------------------------------------------------------------------------------------------------------------------------------------------------------------------------------------------------------------------------------------------------------------------------------------------------------------------------------------------------------------------------------------------------------------------------------------------------------------------------------------------------------------------------------------------------------------------------------------------------------------------------------------------------------------------------------------------------------------------------------------------------------------------------------------------------------------------------------------------------------------------------------------------------------------------------------------------------------------------------------------------------------------------------------------------------------------------------------------------------------------------------------------------------------------------------------------------------------------------------------------------------------------------------------------------------------------------------------------------------------------------------------------------------------------------------------------------------------------------------------------------------------------------------------------------------------------------------------------------------------------------------------------------------------------------------------------------------------------------------------------------------------------------------------------------------------------------------------------------------------------------------------------------------------------------------------------------------------------------------------------------------------------------|-----------|---------------------------------|----------------------------------------------------------------------------|-------------------------------------------------------------------------------------------------------------------------------------------------------------------------------------------------------------------------------------------------------------------------------------------------------------|
| EPI_ISL_735540, EPI_ISL_735542, EPI_ISL_735543, EPI_ISL_735547, EPI_ISL_735548, EPI_ISL_735549, EPI_ISL_735550, EPI_ISL_735551, EPI_ISL_735552, EPI_ISL_735553, EPI_ISL_735554, EPI_ISL_735555, EPI_ISL_735556, EPI_ISL_735557, EPI_ISL_735558, EPI_ISL_735559, EPI_ISL_735560, EPI_ISL_735561, EPI_ISL_735562, EPI_ISL_735563, EPI_ISL_735564, EPI_ISL_735565, EPI_ISL_735566, EPI_ISL_735567, EPI_ISL_735568, EPI_ISL_735569, EPI_ISL_735570, EPI_ISL_735571, EPI_ISL_735572, EPI_ISL_735573, EPI_ISL_735574, EPI_ISL_735575, EPI_ISL_735576, EPI_ISL_735577, EPI_ISL_735578, EPI_ISL_735579, EPI_ISL_735580, EPI_ISL_735581, EPI_ISL_735582, EPI_ISL_735583, EPI_ISL_735584, EPI_ISL_735585, EPI_ISL_735586, EPI_ISL_735587, EPI_ISL_735588, EPI_ISL_735589, EPI_ISL_735590, EPI_ISL_735591, EPI_ISL_735592, EPI_ISL_735593, EPI_ISL_735594, EPI_ISL_735595, EPI_ISL_735596, EPI_ISL_735597, EPI_ISL_735598, EPI_ISL_735599, EPI_ISL_735600, EPI_ISL_735601, EPI_ISL_735602, EPI_ISL_735603, EPI_ISL_735604, EPI_ISL_735605, EPI_ISL_735606, EPI_ISL_735607, EPI_ISL_735608, EPI_ISL_735609, EPI_ISL_735610, EPI_ISL_735611, EPI_ISL_735612, EPI_ISL_735613, EPI_ISL_735614, EPI_ISL_735615, EPI_ISL_735616, EPI_ISL_735617, EPI_ISL_735618, EPI_ISL_735619, EPI_ISL_735620, EPI_ISL_735621, EPI_ISL_735622, EPI_ISL_735623, EPI_ISL_735624, EPI_ISL_735625, EPI_ISL_735626, EPI_ISL_735627, EPI_ISL_735628, EPI_ISL_735629, EPI_ISL_735630, EPI_ISL_735631, EPI_ISL_735632, EPI_ISL_735633, EPI_ISL_735634, EPI_ISL_735635, EPI_ISL_735636, EPI_ISL_735637, EPI_ISL_735638, EPI_ISL_735639, EPI_ISL_735640, EPI_ISL_735641, EPI_ISL_735642, EPI_ISL_735643, EPI_ISL_735644, EPI_ISL_735645, EPI_ISL_735646, EPI_ISL_735647, EPI_ISL_735648, EPI_ISL_735649, EPI_ISL_735650, EPI_ISL_735651, EPI_ISL_735652, EPI_ISL_735653, EPI_ISL_735654, EPI_ISL_735655, EPI_ISL_735656, EPI_ISL_735657, EPI_ISL_735658, EPI_ISL_735659, EPI_ISL_735660, EPI_ISL_735661, EPI_ISL_735662, EPI_ISL_735663, EPI_ISL_735664, EPI_ISL_735665, EPI_ISL_735666, EPI_ISL_735667, EPI_ISL_735668, EPI_ISL_735669, EPI_ISL_735670, EPI_ISL_735671, EPI_ISL_735672, EPI_ISL_735673, EPI_ISL_735674, EPI_ISL_735675, EPI_ISL_735676, EPI_ISL_735677, EPI_ISL_735678, EPI_ISL_735679, EPI_ISL_735680, EPI_ISL_735681, EPI_ISL_735682, EPI_ISL_735683, EPI_ISL_735684, EPI_ISL_735685, EPI_ISL_735686, EPI_ISL_735687, EPI_ISL_735688, EPI_ISL_735689, EPI_ISL_735690, EPI_ISL_735691, EPI_ISL_735692, EPI_ISL_735693, EPI_ISL_735694, EPI_ISL_735695, EPI_ISL_735696, EPI_ISL_735697, EPI_ISL_735698, EPI_ISL_735699, EPI_ISL_735700, EPI_ISL_735701, EPI_ISL_735702, EPI_ISL_735703, EPI_ISL_735704, EPI_ISL_735705, EPI_ISL_735706, EPI_ISL_735707, EPI_ISL_735708, EPI_ISL_735709, EPI_ISL_735710, EPI_ISL_735711, EPI_ISL_735712, EPI_ISL_735713, EPI_ISL_735714, EPI_ISL_735715, EPI_ISL_735716, EPI_ISL_735717, EPI_ISL_735718, EPI_ISL_735719, EPI_ISL_735720, EPI_ISL_735721, EPI_ISL_735722, EPI_ISL_735723, EPI_ISL_735724, EPI_ISL_735725, EPI_ISL_735726, EPI_ISL_735727, EPI_ISL_735728, EPI_ISL_735729, EPI_ISL_735730, EPI_ISL_735731, EPI_ISL_735732, EPI_ISL_735733, EPI_ISL_735734, EPI_ISL_735735, EPI_ISL_735736, EPI_ISL_735737, EPI_ISL_735738, EPI_ISL_735739, EPI_ISL_735740, EPI_ISL_735741, EPI_ISL_735742, EPI_ISL_735743, EPI_ISL_735744, EPI_ISL_735745, EPI_ISL_735746, EPI_ISL_735747, EPI_ISL_735748, EPI_ISL_735749, EPI_ISL_735750, EPI_ISL_735751, EPI_ISL_735752, EPI_ISL_735753, EPI_ISL_735754, EPI_ISL_735755, EPI_ISL_735756, EPI_ISL_735757, EPI_ISL_735758, EPI_ISL_735759, EPI_ISL_735760, EPI_ISL_735761, EPI_ISL_735762, EPI_ISL_735763, EPI_ISL_735764, EPI_ISL_735765, EPI_ISL_735766, EPI_ISL_735767, EPI_ISL_735768, EPI_ISL_735769, EPI_ISL_735770, EPI_ISL_735771, EPI_ISL_735772, EPI_ISL_735773, EPI_ISL_735774, EPI_ISL_735775, EPI_ISL_735776, EPI_ISL_735777, EPI_ISL_735778, EPI_ISL_735779, EPI_ISL_735780, EPI_ISL_735781, EPI_ISL_735782, EPI_ISL_735783, EPI_ISL_735784, EPI_ISL_735785, EPI_ISL_735786, EPI_ISL_735787, EPI_ISL_735788, EPI_ISL_735789, EPI_ISL_735790, EPI_ISL_735791, EPI_ISL_735792, EPI_ISL_735793, EPI_ISL_735794, EPI_ISL_735795, EPI_ISL_735796, EPI_ISL_735797, EPI_ISL_735798, EPI_ISL_735799, EPI_ISL_735800, EPI_ISL_735801, EPI_ISL_735802, EPI_ISL_735803, EPI_ISL_735804, EPI_ISL_735805, EPI_ISL_735806, EPI_ISL_735807, EPI_ISL_735808, EPI_ISL_735809, EPI_ISL_735810, EPI_ISL_735811, EPI_ISL_735812, EPI_ISL_735813, EPI_ISL_735814, EPI_ISL_735815, EPI_ISL_735816, EPI_ISL_735817, EPI_ISL_735818, EPI_ISL_735819, EPI_ISL_735820, EPI_ISL_735821, EPI_ISL_735822, EPI_ISL_735823, EPI_ISL_735824, EPI_ISL_735825, EPI_ISL_735826, EPI_ISL_735827, EPI_ISL_735828, EPI_ISL_735829, EPI_ISL_735830, EPI_ISL_735831, EPI_ISL_735832, EPI_ISL_735833, EPI_ISL_735834, EPI_ISL_735835, EPI_ISL_735836, EPI_ISL_735837, EPI_ISL_735838, EPI_ISL_735839, EPI_ISL_735840, EPI_ISL_735841, EPI_ISL_735842, EPI_ISL_735843, EPI_ISL_735844, EPI_ISL_735845, EPI_ISL_735846, EPI_ISL_735847, EPI_ISL_735848, EPI_ISL_735849, EPI_ISL_735850, EPI_ISL_735851, EPI_ISL_735852, EPI_ISL_735853, EPI_ISL_735854, EPI_ISL_735855, EPI_ISL_735856, EPI_ISL_735857, EPI_ISL_735858, EPI_ISL_735859 | see above | Lighthouse Lab in Milton Keynes | Wellcome Sanger Institute for the COVID-19 Genomics UK (COG-UK) Consortium | The Lighthouse Lab in Milton Keynes and Alex Alderton, Roberto Amato, Sonia Goncalves, Ewan Harrison, David K. Jackson, Ian Johnston, Dominic Kwiatkowski, Cordelia Langford, John Sillitoe on behalf of the Wellcome Sanger Institute COVID-19 Surveillance Team                                           |
| EPI_ISL_735861                                                                                                                                                                                                                                                                                                                                                                                                                                                                                                                                                                                                                                                                                                                                                                                                                                                                                                                                                                                                                                                                                                                                                                                                                                                                                                                                                                                                                                                                                                                                                                                                                                                                                                                                                                                                                                                                                                                                                                                                                                                                                                                                                                                                                                                                                                                                                                                                                                                                                                                                                                                                                                                                                                                                                                                                                                                                                                                                                                                                                                                                                                                                                                                                                                                                                                                                                                                                                                                                                                                                                                                                                                                                                                                                                                                                                                                                                                                                                                                                                                                                                                                                                                                                                                                                                                                                                                                                                                                                                                                                                                                                                                                                                                                                                                                                                                                                                                                                                                                                                                                                                                                                                                                                                                                 |           | Lighthouse Lab in Glasgow       | Wellcome Sanger Institute for the COVID-19 Genomics UK (COG-UK) Consortium | Harper VanSteenhouse, Yumi Kasai, David Gray, Carol Clugston, Anna Dominiczak and Alex Alderton, Roberto Amato, Sonia Goncalves, Ewan Harrison, David K. Jackson, Ian Johnston, Dominic Kwiatkowski, Cordelia Langford, John Sillitoe on behalf of the Wellcome Sanger Institute COVID-19 Surveillance Team |
| EPI_ISL_735862, EPI_ISL_735863                                                                                                                                                                                                                                                                                                                                                                                                                                                                                                                                                                                                                                                                                                                                                                                                                                                                                                                                                                                                                                                                                                                                                                                                                                                                                                                                                                                                                                                                                                                                                                                                                                                                                                                                                                                                                                                                                                                                                                                                                                                                                                                                                                                                                                                                                                                                                                                                                                                                                                                                                                                                                                                                                                                                                                                                                                                                                                                                                                                                                                                                                                                                                                                                                                                                                                                                                                                                                                                                                                                                                                                                                                                                                                                                                                                                                                                                                                                                                                                                                                                                                                                                                                                                                                                                                                                                                                                                                                                                                                                                                                                                                                                                                                                                                                                                                                                                                                                                                                                                                                                                                                                                                                                                                                 |           | Lighthouse Lab in Alderley Park |                                                                            |                                                                                                                                                                                                                                                                                                             |

[illegible]

[illegible]

[illegible]

[illegible]

[illegible]





[illegible]

|                                                                                                                                                                                                                                                                                                                                                                                                                                                                                                                                                                                                                                                                                                                                                                                                                                                                                                                                                                                                                                                                                                                                                                                                                                                                                                                                                                                                                                                                                                                                                                                                                                                                                                                                |                                                                                                                                        |                                                                                                                                        |                                                                                                                                                                                                                                                                                                                                                                                                                                                                          |
|--------------------------------------------------------------------------------------------------------------------------------------------------------------------------------------------------------------------------------------------------------------------------------------------------------------------------------------------------------------------------------------------------------------------------------------------------------------------------------------------------------------------------------------------------------------------------------------------------------------------------------------------------------------------------------------------------------------------------------------------------------------------------------------------------------------------------------------------------------------------------------------------------------------------------------------------------------------------------------------------------------------------------------------------------------------------------------------------------------------------------------------------------------------------------------------------------------------------------------------------------------------------------------------------------------------------------------------------------------------------------------------------------------------------------------------------------------------------------------------------------------------------------------------------------------------------------------------------------------------------------------------------------------------------------------------------------------------------------------|----------------------------------------------------------------------------------------------------------------------------------------|----------------------------------------------------------------------------------------------------------------------------------------|--------------------------------------------------------------------------------------------------------------------------------------------------------------------------------------------------------------------------------------------------------------------------------------------------------------------------------------------------------------------------------------------------------------------------------------------------------------------------|
| EPI_ISL_736766, EPI_ISL_736768, EPI_ISL_736770, EPI_ISL_736771, EPI_ISL_736772                                                                                                                                                                                                                                                                                                                                                                                                                                                                                                                                                                                                                                                                                                                                                                                                                                                                                                                                                                                                                                                                                                                                                                                                                                                                                                                                                                                                                                                                                                                                                                                                                                                 |                                                                                                                                        |                                                                                                                                        |                                                                                                                                                                                                                                                                                                                                                                                                                                                                          |
| EPI_ISL_736774                                                                                                                                                                                                                                                                                                                                                                                                                                                                                                                                                                                                                                                                                                                                                                                                                                                                                                                                                                                                                                                                                                                                                                                                                                                                                                                                                                                                                                                                                                                                                                                                                                                                                                                 | Lighthouse Lab in Glasgow                                                                                                              | Wellcome Sanger Institute for the COVID-19 Genomics UK (COG-UK) Consortium                                                             | Harper VanSteenhouse, Yumi Kasai, David Gray, Carol Clugston, Anna Dominiczak and Alex Alderton, Roberto Amato, Sonia Goncalves, Ewan Harrison, David K. Jackson, Ian Johnston, Dominic Kwiatkowski, Cordelia Langford, John Sillitoe on behalf of the Wellcome Sanger Institute COVID-19 Surveillance Team                                                                                                                                                              |
| EPI_ISL_736996                                                                                                                                                                                                                                                                                                                                                                                                                                                                                                                                                                                                                                                                                                                                                                                                                                                                                                                                                                                                                                                                                                                                                                                                                                                                                                                                                                                                                                                                                                                                                                                                                                                                                                                 | Istituto Zooprofilattico Sperimentale del Mezzogiorno                                                                                  | National Institute for Infectious Diseases, INMI, "L. Spallanzani" IRCCS                                                               | E. Giombini, C.E.M Gruber, F. Messina, M. Rueca, B. Bartolini, F. Carletti, P. Cerino, B. Pierri, C. Buonerba, D. Di Concilio, M.C. Cuomo, A. Di Caro, M.R Capobianchi                                                                                                                                                                                                                                                                                                   |
| EPI_ISL_736997                                                                                                                                                                                                                                                                                                                                                                                                                                                                                                                                                                                                                                                                                                                                                                                                                                                                                                                                                                                                                                                                                                                                                                                                                                                                                                                                                                                                                                                                                                                                                                                                                                                                                                                 | Istituto Zooprofilattico Sperimentale del Mezzogiorno                                                                                  | National Institute for Infectious Diseases, INMI, "L. Spallanzani" IRCCS                                                               | F. Messina, C.E.M Gruber, M. Rueca, B. Bartolini, E. Giombini, F. Carletti, P. Cerino, B. Pierri, C. Buonerba, D. Di Concilio, M.C. Cuomo, M.R. Capobianchi, A. Di Caro                                                                                                                                                                                                                                                                                                  |
| EPI_ISL_737204                                                                                                                                                                                                                                                                                                                                                                                                                                                                                                                                                                                                                                                                                                                                                                                                                                                                                                                                                                                                                                                                                                                                                                                                                                                                                                                                                                                                                                                                                                                                                                                                                                                                                                                 | Central Virology Laboratory, Israel Ministry of Health                                                                                 | Central Virology Laboratory, Israel Ministry of Health                                                                                 | Neta S. Zuckerman, Efrat Dahan Bucris, Oran Erster, Michal Mandelboim, Orna Mor, Ella Mendelson                                                                                                                                                                                                                                                                                                                                                                          |
| EPI_ISL_737239, EPI_ISL_737244, EPI_ISL_737247, EPI_ISL_737249, EPI_ISL_737253, EPI_ISL_737254, EPI_ISL_737260                                                                                                                                                                                                                                                                                                                                                                                                                                                                                                                                                                                                                                                                                                                                                                                                                                                                                                                                                                                                                                                                                                                                                                                                                                                                                                                                                                                                                                                                                                                                                                                                                 | Los Angeles County PHL                                                                                                                 | Los Angeles County PHL                                                                                                                 | P. Hemarajata et al.                                                                                                                                                                                                                                                                                                                                                                                                                                                     |
| EPI_ISL_737313, EPI_ISL_737319, EPI_ISL_737320, EPI_ISL_737322, EPI_ISL_737325, EPI_ISL_737335, EPI_ISL_737343, EPI_ISL_737346, EPI_ISL_737350, EPI_ISL_737351, EPI_ISL_737353, EPI_ISL_737359, EPI_ISL_737369, EPI_ISL_737372, EPI_ISL_737379, EPI_ISL_737381, EPI_ISL_737383, EPI_ISL_737384, EPI_ISL_737385, EPI_ISL_737390, EPI_ISL_737392                                                                                                                                                                                                                                                                                                                                                                                                                                                                                                                                                                                                                                                                                                                                                                                                                                                                                                                                                                                                                                                                                                                                                                                                                                                                                                                                                                                 |                                                                                                                                        |                                                                                                                                        |                                                                                                                                                                                                                                                                                                                                                                                                                                                                          |
| see above                                                                                                                                                                                                                                                                                                                                                                                                                                                                                                                                                                                                                                                                                                                                                                                                                                                                                                                                                                                                                                                                                                                                                                                                                                                                                                                                                                                                                                                                                                                                                                                                                                                                                                                      | Department of Clinical Microbiology                                                                                                    | GIGA Medical Genomics                                                                                                                  | Keith Durkin, Maria Artesi, Sébastien Bontems, Raphaël Boreux, Bouchra Boujemla, Cécile Meex, Pierrette Melin, Marie-Pierre Hayette, Vincent Bours                                                                                                                                                                                                                                                                                                                       |
| EPI_ISL_737876                                                                                                                                                                                                                                                                                                                                                                                                                                                                                                                                                                                                                                                                                                                                                                                                                                                                                                                                                                                                                                                                                                                                                                                                                                                                                                                                                                                                                                                                                                                                                                                                                                                                                                                 | Viollier AG                                                                                                                            | Department of Biosystems Science and Engineering, ETH Zürich                                                                           | Chaoran Chen, Sarah Nadeau, Catharine Aquino, Ivan Topolsky, Philipp Jablonski, Lara Fuhrmann, David Dreifuss, Katharina Jahn, Andreia Cabral de Gouvea, Maria Domenica Moccia, Simon Grüter, Timothy Sykes, Lennart Opitz, Griffin White, Laura Neff, Doris Popovic, Andrea Patrignani, Jay Tracy, Ralph Schlapbach, Christiane Beckmann, Maurice Redondo, Olivier Kobel, Christoph Noppen, Sophie Seidel, Noemie Santamaria de Souza, Niko Beerenwinkel, Tanja Stadler |
| EPI_ISL_738048                                                                                                                                                                                                                                                                                                                                                                                                                                                                                                                                                                                                                                                                                                                                                                                                                                                                                                                                                                                                                                                                                                                                                                                                                                                                                                                                                                                                                                                                                                                                                                                                                                                                                                                 | SIESP CHIETI - DRIVE IN ORTONA                                                                                                         | Istituto Zooprofilattico Sperimentale dell'Abruzzo e Molise "G. Caporale"                                                              | Lorusso A, Marcacci M, Di Domenico M, Ancora M, Curini V, Mangone I, Rinaldi A, Di Pasquale A, Cammà C, Puglia I, Savini G                                                                                                                                                                                                                                                                                                                                               |
| EPI_ISL_738093, EPI_ISL_738094, EPI_ISL_738095, EPI_ISL_738096, EPI_ISL_738097, EPI_ISL_738098, EPI_ISL_738099, EPI_ISL_738100, EPI_ISL_738101, EPI_ISL_738102, EPI_ISL_738103, EPI_ISL_738104, EPI_ISL_738105, EPI_ISL_738108, EPI_ISL_738109, EPI_ISL_738110, EPI_ISL_738112, EPI_ISL_738113, EPI_ISL_738114                                                                                                                                                                                                                                                                                                                                                                                                                                                                                                                                                                                                                                                                                                                                                                                                                                                                                                                                                                                                                                                                                                                                                                                                                                                                                                                                                                                                                 |                                                                                                                                        |                                                                                                                                        |                                                                                                                                                                                                                                                                                                                                                                                                                                                                          |
| see above                                                                                                                                                                                                                                                                                                                                                                                                                                                                                                                                                                                                                                                                                                                                                                                                                                                                                                                                                                                                                                                                                                                                                                                                                                                                                                                                                                                                                                                                                                                                                                                                                                                                                                                      | Instituto Nacional de Saude (INSA)                                                                                                     | Instituto Nacional de Saude (INSA)                                                                                                     | Borges et al                                                                                                                                                                                                                                                                                                                                                                                                                                                             |
| EPI_ISL_738133                                                                                                                                                                                                                                                                                                                                                                                                                                                                                                                                                                                                                                                                                                                                                                                                                                                                                                                                                                                                                                                                                                                                                                                                                                                                                                                                                                                                                                                                                                                                                                                                                                                                                                                 | The Public Health Agency of Sweden                                                                                                     | The Public Health Agency of Sweden                                                                                                     | Oskar Karlsson Lindsjo, Maria Lind Karlberg, Anna-Malin Linde, Sofia Stamouli, Olov Svartstrom, Anna Risberg, Shaman Muradrasoli, Karin Tegmark-Wisell                                                                                                                                                                                                                                                                                                                   |
| EPI_ISL_738134                                                                                                                                                                                                                                                                                                                                                                                                                                                                                                                                                                                                                                                                                                                                                                                                                                                                                                                                                                                                                                                                                                                                                                                                                                                                                                                                                                                                                                                                                                                                                                                                                                                                                                                 | Department of Virology and Immunology, University of Helsinki and Helsinki University Hospital, Huslab Finland                         | Department of Virology, Faculty of Medicine, University of Helsinki, Helsinki, Finland                                                 | Teemu Smura, Olli Vapalahti, Maija Lappalainen, Satu Kurkela                                                                                                                                                                                                                                                                                                                                                                                                             |
| EPI_ISL_738142                                                                                                                                                                                                                                                                                                                                                                                                                                                                                                                                                                                                                                                                                                                                                                                                                                                                                                                                                                                                                                                                                                                                                                                                                                                                                                                                                                                                                                                                                                                                                                                                                                                                                                                 | Division of Emerging Infectious Diseases, Bureau of Infectious Diseases Diagnosis Control, Korea Disease Control and Prevention Agency | Division of Emerging Infectious Diseases, Bureau of Infectious Diseases Diagnosis Control, Korea Disease Control and Prevention Agency | Jeong-Min Kim, Il-Hwan Kim, Ae Kyung Park, Namjoo Lee, Sang Hee Woo, Heui Man Kim, Eun-Jin Kim                                                                                                                                                                                                                                                                                                                                                                           |
| EPI_ISL_738144                                                                                                                                                                                                                                                                                                                                                                                                                                                                                                                                                                                                                                                                                                                                                                                                                                                                                                                                                                                                                                                                                                                                                                                                                                                                                                                                                                                                                                                                                                                                                                                                                                                                                                                 | University of Bari Biomedical Sciences and Human Oncology                                                                              | University of Bari Biomedical Sciences and Human Oncology                                                                              | Maria Chironna, Anna Sallustio, Daniela Loconsole, Marisa Accogli                                                                                                                                                                                                                                                                                                                                                                                                        |
| EPI_ISL_738361, EPI_ISL_738362, EPI_ISL_738363, EPI_ISL_738364, EPI_ISL_738365, EPI_ISL_738366, EPI_ISL_738367, EPI_ISL_738368, EPI_ISL_738369, EPI_ISL_738370, EPI_ISL_738371, EPI_ISL_738372, EPI_ISL_738373, EPI_ISL_738374, EPI_ISL_738375, EPI_ISL_738376, EPI_ISL_738378, EPI_ISL_738379, EPI_ISL_738380, EPI_ISL_738381, EPI_ISL_738382, EPI_ISL_738383, EPI_ISL_738384, EPI_ISL_738385, EPI_ISL_738386, EPI_ISL_738387, EPI_ISL_738388, EPI_ISL_738389, EPI_ISL_738390, EPI_ISL_738391, EPI_ISL_738392, EPI_ISL_738393, EPI_ISL_738394, EPI_ISL_738395, EPI_ISL_738396, EPI_ISL_738397, EPI_ISL_738398, EPI_ISL_738399, EPI_ISL_738400, EPI_ISL_738401, EPI_ISL_738402, EPI_ISL_738403, EPI_ISL_738404, EPI_ISL_738405, EPI_ISL_738406, EPI_ISL_738407, EPI_ISL_738408, EPI_ISL_738409, EPI_ISL_738410, EPI_ISL_738411, EPI_ISL_738412, EPI_ISL_738414, EPI_ISL_738415, EPI_ISL_738416, EPI_ISL_738418, EPI_ISL_738420, EPI_ISL_738421, EPI_ISL_738422, EPI_ISL_738423, EPI_ISL_738424, EPI_ISL_738426, EPI_ISL_738427, EPI_ISL_738428, EPI_ISL_738429, EPI_ISL_738430, EPI_ISL_738431, EPI_ISL_738432, EPI_ISL_738433, EPI_ISL_738434, EPI_ISL_738435, EPI_ISL_738437, EPI_ISL_738438, EPI_ISL_738439, EPI_ISL_738440, EPI_ISL_738441, EPI_ISL_738443, EPI_ISL_738444, EPI_ISL_738445, EPI_ISL_738446, EPI_ISL_738449, EPI_ISL_738450, EPI_ISL_738451, EPI_ISL_738452, EPI_ISL_738455, EPI_ISL_738461, EPI_ISL_738462, EPI_ISL_738464, EPI_ISL_738465, EPI_ISL_738467, EPI_ISL_738472, EPI_ISL_738474, EPI_ISL_738476, EPI_ISL_738477, EPI_ISL_738482, EPI_ISL_738483, EPI_ISL_738484, EPI_ISL_738485, EPI_ISL_738487, EPI_ISL_738488, EPI_ISL_738489, EPI_ISL_738490, EPI_ISL_738491, EPI_ISL_738494, EPI_ISL_738499 |                                                                                                                                        |                                                                                                                                        |                                                                                                                                                                                                                                                                                                                                                                                                                                                                          |
| see above                                                                                                                                                                                                                                                                                                                                                                                                                                                                                                                                                                                                                                                                                                                                                                                                                                                                                                                                                                                                                                                                                                                                                                                                                                                                                                                                                                                                                                                                                                                                                                                                                                                                                                                      | UZ Leuven, National Reference Laboratory for Coronaviruses, Laboratory Medicine, Leuven, Belgium                                       | KU Leuven, Rega Institute, Clinical and Epidemiological Virology                                                                       | Tony Wawina-Bokalanga, Joan Marti-Carerras, Bert Vanmechelen, Piet Maes                                                                                                                                                                                                                                                                                                                                                                                                  |
| EPI_ISL_738712                                                                                                                                                                                                                                                                                                                                                                                                                                                                                                                                                                                                                                                                                                                                                                                                                                                                                                                                                                                                                                                                                                                                                                                                                                                                                                                                                                                                                                                                                                                                                                                                                                                                                                                 | Renegade                                                                                                                               | Chan-Zuckerberg Biohub                                                                                                                 | CZB Ciliahub Consortium                                                                                                                                                                                                                                                                                                                                                                                                                                                  |
| EPI_ISL_738750                                                                                                                                                                                                                                                                                                                                                                                                                                                                                                                                                                                                                                                                                                                                                                                                                                                                                                                                                                                                                                                                                                                                                                                                                                                                                                                                                                                                                                                                                                                                                                                                                                                                                                                 | Santa Clara County Public Health Laboratory                                                                                            | Chan-Zuckerberg Biohub                                                                                                                 | CZB Ciliahub Consortium                                                                                                                                                                                                                                                                                                                                                                                                                                                  |
| EPI_ISL_738752, EPI_ISL_738758, EPI_ISL_738808, EPI_ISL_738829                                                                                                                                                                                                                                                                                                                                                                                                                                                                                                                                                                                                                                                                                                                                                                                                                                                                                                                                                                                                                                                                                                                                                                                                                                                                                                                                                                                                                                                                                                                                                                                                                                                                 | Orange County Public Health Lab                                                                                                        | Chan-Zuckerberg Biohub                                                                                                                 | CZB Ciliahub Consortium                                                                                                                                                                                                                                                                                                                                                                                                                                                  |
| EPI_ISL_738851                                                                                                                                                                                                                                                                                                                                                                                                                                                                                                                                                                                                                                                                                                                                                                                                                                                                                                                                                                                                                                                                                                                                                                                                                                                                                                                                                                                                                                                                                                                                                                                                                                                                                                                 | Renegade                                                                                                                               | Chan-Zuckerberg Biohub                                                                                                                 | CZB Ciliahub Consortium                                                                                                                                                                                                                                                                                                                                                                                                                                                  |
| EPI_ISL_738880, EPI_ISL_738939, EPI_ISL_738954                                                                                                                                                                                                                                                                                                                                                                                                                                                                                                                                                                                                                                                                                                                                                                                                                                                                                                                                                                                                                                                                                                                                                                                                                                                                                                                                                                                                                                                                                                                                                                                                                                                                                 | Orange County Public Health Lab                                                                                                        | Chan-Zuckerberg Biohub                                                                                                                 | CZB Ciliahub Consortium                                                                                                                                                                                                                                                                                                                                                                                                                                                  |
| EPI_ISL_738967                                                                                                                                                                                                                                                                                                                                                                                                                                                                                                                                                                                                                                                                                                                                                                                                                                                                                                                                                                                                                                                                                                                                                                                                                                                                                                                                                                                                                                                                                                                                                                                                                                                                                                                 | Santa Clara County Public Health Laboratory                                                                                            | Chan-Zuckerberg Biohub                                                                                                                 | CZB Ciliahub Consortium                                                                                                                                                                                                                                                                                                                                                                                                                                                  |
| EPI_ISL_738977                                                                                                                                                                                                                                                                                                                                                                                                                                                                                                                                                                                                                                                                                                                                                                                                                                                                                                                                                                                                                                                                                                                                                                                                                                                                                                                                                                                                                                                                                                                                                                                                                                                                                                                 | Renegade                                                                                                                               | Chan-Zuckerberg Biohub                                                                                                                 | CZB Ciliahub Consortium                                                                                                                                                                                                                                                                                                                                                                                                                                                  |
| EPI_ISL_738981, EPI_ISL_738989, EPI_ISL_738993                                                                                                                                                                                                                                                                                                                                                                                                                                                                                                                                                                                                                                                                                                                                                                                                                                                                                                                                                                                                                                                                                                                                                                                                                                                                                                                                                                                                                                                                                                                                                                                                                                                                                 | Orange County Public Health Lab                                                                                                        | Chan-Zuckerberg Biohub                                                                                                                 | CZB Ciliahub Consortium                                                                                                                                                                                                                                                                                                                                                                                                                                                  |
| EPI_ISL_739040, EPI_ISL_739050, EPI_ISL_739058, EPI_ISL_739166                                                                                                                                                                                                                                                                                                                                                                                                                                                                                                                                                                                                                                                                                                                                                                                                                                                                                                                                                                                                                                                                                                                                                                                                                                                                                                                                                                                                                                                                                                                                                                                                                                                                 | Santa Clara County Public Health Laboratory                                                                                            | Chan-Zuckerberg Biohub                                                                                                                 | CZB Ciliahub Consortium                                                                                                                                                                                                                                                                                                                                                                                                                                                  |
| EPI_ISL_739182, EPI_ISL_739259                                                                                                                                                                                                                                                                                                                                                                                                                                                                                                                                                                                                                                                                                                                                                                                                                                                                                                                                                                                                                                                                                                                                                                                                                                                                                                                                                                                                                                                                                                                                                                                                                                                                                                 | Orange County Public Health Lab                                                                                                        | Chan-Zuckerberg Biohub                                                                                                                 | CZB Ciliahub Consortium                                                                                                                                                                                                                                                                                                                                                                                                                                                  |
| EPI_ISL_739370                                                                                                                                                                                                                                                                                                                                                                                                                                                                                                                                                                                                                                                                                                                                                                                                                                                                                                                                                                                                                                                                                                                                                                                                                                                                                                                                                                                                                                                                                                                                                                                                                                                                                                                 | Santa Clara County Public Health Laboratory                                                                                            | Chan-Zuckerberg Biohub                                                                                                                 | CZB Ciliahub Consortium                                                                                                                                                                                                                                                                                                                                                                                                                                                  |
| EPI_ISL_739432, EPI_ISL_739462                                                                                                                                                                                                                                                                                                                                                                                                                                                                                                                                                                                                                                                                                                                                                                                                                                                                                                                                                                                                                                                                                                                                                                                                                                                                                                                                                                                                                                                                                                                                                                                                                                                                                                 | Orange County Public Health Lab                                                                                                        | Chan-Zuckerberg Biohub                                                                                                                 | CZB Ciliahub Consortium                                                                                                                                                                                                                                                                                                                                                                                                                                                  |
| EPI_ISL_739467                                                                                                                                                                                                                                                                                                                                                                                                                                                                                                                                                                                                                                                                                                                                                                                                                                                                                                                                                                                                                                                                                                                                                                                                                                                                                                                                                                                                                                                                                                                                                                                                                                                                                                                 | Renegade                                                                                                                               | Chan-Zuckerberg Biohub                                                                                                                 | CZB Ciliahub Consortium                                                                                                                                                                                                                                                                                                                                                                                                                                                  |
| EPI_ISL_739488                                                                                                                                                                                                                                                                                                                                                                                                                                                                                                                                                                                                                                                                                                                                                                                                                                                                                                                                                                                                                                                                                                                                                                                                                                                                                                                                                                                                                                                                                                                                                                                                                                                                                                                 | Orange County Public Health Lab                                                                                                        | Chan-Zuckerberg Biohub                                                                                                                 | CZB Ciliahub Consortium                                                                                                                                                                                                                                                                                                                                                                                                                                                  |
| EPI_ISL_739593                                                                                                                                                                                                                                                                                                                                                                                                                                                                                                                                                                                                                                                                                                                                                                                                                                                                                                                                                                                                                                                                                                                                                                                                                                                                                                                                                                                                                                                                                                                                                                                                                                                                                                                 | Santa Clara County Public Health Laboratory                                                                                            | Chan-Zuckerberg Biohub                                                                                                                 | CZB Ciliahub Consortium                                                                                                                                                                                                                                                                                                                                                                                                                                                  |
| EPI_ISL_739599                                                                                                                                                                                                                                                                                                                                                                                                                                                                                                                                                                                                                                                                                                                                                                                                                                                                                                                                                                                                                                                                                                                                                                                                                                                                                                                                                                                                                                                                                                                                                                                                                                                                                                                 | Orange County Public Health Lab                                                                                                        | Chan-Zuckerberg Biohub                                                                                                                 | CZB Ciliahub Consortium                                                                                                                                                                                                                                                                                                                                                                                                                                                  |
| EPI_ISL_739910, EPI_ISL_739936, EPI_ISL_739937, EPI_ISL_739943, EPI_ISL_739971, EPI_ISL_740039, EPI_ISL_740056, EPI_ISL_740061, EPI_ISL_740077, EPI_ISL_740111, EPI_ISL_740160, EPI_ISL_740165, EPI_ISL_740214, EPI_ISL_740237, EPI_ISL_740267, EPI_ISL_740271, EPI_ISL_740274, EPI_ISL_740330, EPI_ISL_740345, EPI_ISL_740375, EPI_ISL_740387, EPI_ISL_740424, EPI_ISL_740489, EPI_ISL_740532, EPI_ISL_740546                                                                                                                                                                                                                                                                                                                                                                                                                                                                                                                                                                                                                                                                                                                                                                                                                                                                                                                                                                                                                                                                                                                                                                                                                                                                                                                 |                                                                                                                                        |                                                                                                                                        |                                                                                                                                                                                                                                                                                                                                                                                                                                                                          |
| see above                                                                                                                                                                                                                                                                                                                                                                                                                                                                                                                                                                                                                                                                                                                                                                                                                                                                                                                                                                                                                                                                                                                                                                                                                                                                                                                                                                                                                                                                                                                                                                                                                                                                                                                      | Laboratoire national de santé, Microbiology, Virology                                                                                  | Laboratoire national de santé, Microbiology, Microbial Genomics Platform                                                               | Anke Wienecke-Baldacchino, Catherine Ragimbeau, Jessica Tapp, Fatu Djabi, Lise Pignon, Raoul Salmon, Tamir Abdelrahman                                                                                                                                                                                                                                                                                                                                                   |
| EPI_ISL_740981, EPI_ISL_741005, EPI_ISL_741016, EPI_ISL_741017                                                                                                                                                                                                                                                                                                                                                                                                                                                                                                                                                                                                                                                                                                                                                                                                                                                                                                                                                                                                                                                                                                                                                                                                                                                                                                                                                                                                                                                                                                                                                                                                                                                                 | Department of Pathology, University of Cambridge                                                                                       | COVID-19 Genomics UK (COG-UK) Consortium                                                                                               | Aminu S. Jahun, Yasmin Chaudhry, Grant Hall, Iliana Georgana, Myra Hosmillo, Martin D. Curran, Malte Pinckert, Surendra Parmar, Ian Goodfellow                                                                                                                                                                                                                                                                                                                           |

|                                                                                                                                                                                                                                                                                                                                                                                                                                                                                                                                                                                                                                                                                                                                                                                                                                                                                                                                                                                                                                                                                                                                                                                                                                                                                                                                                                                                                                                                                                                                                                                                                                                                                                                                                                                                                                                                                                                                                                                                                                                                                                                                                                                                                                                                                                                                                                                                                                                                                                                                                                                                                                                                                                                                                                                                                                                                                                                                                                                                                                                                                                                                                                                                                                                                                                                                                                                                                                                                                                                                                                                                                                                                                                                                                                                                                                |                                                                                                                                                                                                                     |                                          |                                                                                                                                                                                                                                                                                                                                                                                                                                                           |
|--------------------------------------------------------------------------------------------------------------------------------------------------------------------------------------------------------------------------------------------------------------------------------------------------------------------------------------------------------------------------------------------------------------------------------------------------------------------------------------------------------------------------------------------------------------------------------------------------------------------------------------------------------------------------------------------------------------------------------------------------------------------------------------------------------------------------------------------------------------------------------------------------------------------------------------------------------------------------------------------------------------------------------------------------------------------------------------------------------------------------------------------------------------------------------------------------------------------------------------------------------------------------------------------------------------------------------------------------------------------------------------------------------------------------------------------------------------------------------------------------------------------------------------------------------------------------------------------------------------------------------------------------------------------------------------------------------------------------------------------------------------------------------------------------------------------------------------------------------------------------------------------------------------------------------------------------------------------------------------------------------------------------------------------------------------------------------------------------------------------------------------------------------------------------------------------------------------------------------------------------------------------------------------------------------------------------------------------------------------------------------------------------------------------------------------------------------------------------------------------------------------------------------------------------------------------------------------------------------------------------------------------------------------------------------------------------------------------------------------------------------------------------------------------------------------------------------------------------------------------------------------------------------------------------------------------------------------------------------------------------------------------------------------------------------------------------------------------------------------------------------------------------------------------------------------------------------------------------------------------------------------------------------------------------------------------------------------------------------------------------------------------------------------------------------------------------------------------------------------------------------------------------------------------------------------------------------------------------------------------------------------------------------------------------------------------------------------------------------------------------------------------------------------------------------------------------------|---------------------------------------------------------------------------------------------------------------------------------------------------------------------------------------------------------------------|------------------------------------------|-----------------------------------------------------------------------------------------------------------------------------------------------------------------------------------------------------------------------------------------------------------------------------------------------------------------------------------------------------------------------------------------------------------------------------------------------------------|
| EPI_ISL_741428, EPI_ISL_741429, EPI_ISL_741430                                                                                                                                                                                                                                                                                                                                                                                                                                                                                                                                                                                                                                                                                                                                                                                                                                                                                                                                                                                                                                                                                                                                                                                                                                                                                                                                                                                                                                                                                                                                                                                                                                                                                                                                                                                                                                                                                                                                                                                                                                                                                                                                                                                                                                                                                                                                                                                                                                                                                                                                                                                                                                                                                                                                                                                                                                                                                                                                                                                                                                                                                                                                                                                                                                                                                                                                                                                                                                                                                                                                                                                                                                                                                                                                                                                 | Northumbria University / South Tees Hospitals NHS Foundation Trust / North Cumbria Integrated Care NHS Foundation Trust / North Tees and Hartlepool NHS Foundation Trust / Newcastle Hospitals NHS Foundation Trust | COVID-19 Genomics UK (COG-UK) Consortium | Darren L. Smith, Andrew Nelson, Matthew Bashton, Greg R Young, Joshua Loh, John Allan, Mohammad A Tariq, Giles S Holt, Gary Black, Wen C Yew, Lynn Dover, Paul Baker, Steve Liggett, Sarah Essex, Jane Greenaway, Debra Padgett, Clive Graham, Garren Scott, Edward Barton, Emma Swindells, Brendan Payne, Jennifer Collins, Yusri Taha, Gary Eltringham                                                                                                  |
| EPI_ISL_741488, EPI_ISL_741489, EPI_ISL_741490, EPI_ISL_741492, EPI_ISL_741535, EPI_ISL_741558, EPI_ISL_741560, EPI_ISL_741561, EPI_ISL_741564, EPI_ISL_741568, EPI_ISL_741570, EPI_ISL_741572, EPI_ISL_741573, EPI_ISL_741574, EPI_ISL_741580, EPI_ISL_741584, EPI_ISL_741586, EPI_ISL_741587, EPI_ISL_741588, EPI_ISL_741589, EPI_ISL_741590, EPI_ISL_741591, EPI_ISL_741594, EPI_ISL_741597, EPI_ISL_741599, EPI_ISL_741600, EPI_ISL_741605                                                                                                                                                                                                                                                                                                                                                                                                                                                                                                                                                                                                                                                                                                                                                                                                                                                                                                                                                                                                                                                                                                                                                                                                                                                                                                                                                                                                                                                                                                                                                                                                                                                                                                                                                                                                                                                                                                                                                                                                                                                                                                                                                                                                                                                                                                                                                                                                                                                                                                                                                                                                                                                                                                                                                                                                                                                                                                                                                                                                                                                                                                                                                                                                                                                                                                                                                                                 |                                                                                                                                                                                                                     |                                          |                                                                                                                                                                                                                                                                                                                                                                                                                                                           |
| see above                                                                                                                                                                                                                                                                                                                                                                                                                                                                                                                                                                                                                                                                                                                                                                                                                                                                                                                                                                                                                                                                                                                                                                                                                                                                                                                                                                                                                                                                                                                                                                                                                                                                                                                                                                                                                                                                                                                                                                                                                                                                                                                                                                                                                                                                                                                                                                                                                                                                                                                                                                                                                                                                                                                                                                                                                                                                                                                                                                                                                                                                                                                                                                                                                                                                                                                                                                                                                                                                                                                                                                                                                                                                                                                                                                                                                      | Quadram Institute Bioscience                                                                                                                                                                                        | COVID-19 Genomics UK (COG-UK) Consortium | Dave J. Baker, Gemma L. Kay, Alp Aydin, Thanh Le-Viet, Steven Rudder, Ana P. Tedim, Anastasia Kolyva, Maria Diaz, Leonardo de Oliveira Martins, Nabil-Fareed Alikhan, Lizzie Meadows, Rachael Stanley, Ngozi Elumogo, Muhammed Yasir, Nicholas M. Thomson, Alexander J Trotter, Rachel Gilroy, Samuel Bloomfield, Claire Stuart, Andrew Bell, Reenesh Prakash, Samir Dervisevic, Alison E. Mather, John Wain, Mark Webber, Andrew J. Page, Justin O'Grady |
| EPI_ISL_741612, EPI_ISL_741623, EPI_ISL_741624, EPI_ISL_741627, EPI_ISL_741629, EPI_ISL_741632, EPI_ISL_741639, EPI_ISL_741640, EPI_ISL_741648, EPI_ISL_741656                                                                                                                                                                                                                                                                                                                                                                                                                                                                                                                                                                                                                                                                                                                                                                                                                                                                                                                                                                                                                                                                                                                                                                                                                                                                                                                                                                                                                                                                                                                                                                                                                                                                                                                                                                                                                                                                                                                                                                                                                                                                                                                                                                                                                                                                                                                                                                                                                                                                                                                                                                                                                                                                                                                                                                                                                                                                                                                                                                                                                                                                                                                                                                                                                                                                                                                                                                                                                                                                                                                                                                                                                                                                 | Queens Medical Centre, Clinical Microbiology Department / DeepSeq Nottingham                                                                                                                                        | COVID-19 Genomics UK (COG-UK) Consortium | Gemma Clark, Wendy Smith, Manjinder Khakh, Vicki M Fleming, Michelle M Lister, Hannah Howson-Wells, Jonathan Ball, Patrick McClure, Joseph Chappell, Theocharis Tsoleridis, Nadine Holmes, Matthew Carlisle, Christopher Moore, Fei Sang, Johnny Debebe, Victoria Wright, Matthew Loose                                                                                                                                                                   |
| EPI_ISL_741675, EPI_ISL_741732                                                                                                                                                                                                                                                                                                                                                                                                                                                                                                                                                                                                                                                                                                                                                                                                                                                                                                                                                                                                                                                                                                                                                                                                                                                                                                                                                                                                                                                                                                                                                                                                                                                                                                                                                                                                                                                                                                                                                                                                                                                                                                                                                                                                                                                                                                                                                                                                                                                                                                                                                                                                                                                                                                                                                                                                                                                                                                                                                                                                                                                                                                                                                                                                                                                                                                                                                                                                                                                                                                                                                                                                                                                                                                                                                                                                 | Centre for Enzyme Innovation, University of Portsmouth / Translational Research Laboratory, Portsmouth Hospitals NHS Trust                                                                                          | COVID-19 Genomics UK (COG-UK) Consortium | Angela Beckett, Yann Bourgeois, Garry Scarlett, Sharon Glaysher, Scott Elliott, Kelly Bicknell, Robert Impey, Allyson Lloyd, Sarah Wyllie, Ethan Butcher, Anoop Chauhan, Samuel Robson                                                                                                                                                                                                                                                                    |
| EPI_ISL_742178, EPI_ISL_742184, EPI_ISL_742186, EPI_ISL_742188, EPI_ISL_742189, EPI_ISL_742191, EPI_ISL_742192, EPI_ISL_742195, EPI_ISL_742200, EPI_ISL_742201, EPI_ISL_742203, EPI_ISL_742204, EPI_ISL_742205, EPI_ISL_742206, EPI_ISL_742207, EPI_ISL_742208, EPI_ISL_742209, EPI_ISL_742210, EPI_ISL_742212, EPI_ISL_742213, EPI_ISL_742214, EPI_ISL_742215, EPI_ISL_742216, EPI_ISL_742219, EPI_ISL_742220, EPI_ISL_742221, EPI_ISL_742223, EPI_ISL_742224, EPI_ISL_742225, EPI_ISL_742226, EPI_ISL_742227, EPI_ISL_742228, EPI_ISL_742230, EPI_ISL_742231, EPI_ISL_742232, EPI_ISL_742233, EPI_ISL_742234, EPI_ISL_742235, EPI_ISL_742237, EPI_ISL_742238, EPI_ISL_742239, EPI_ISL_742240, EPI_ISL_742242                                                                                                                                                                                                                                                                                                                                                                                                                                                                                                                                                                                                                                                                                                                                                                                                                                                                                                                                                                                                                                                                                                                                                                                                                                                                                                                                                                                                                                                                                                                                                                                                                                                                                                                                                                                                                                                                                                                                                                                                                                                                                                                                                                                                                                                                                                                                                                                                                                                                                                                                                                                                                                                                                                                                                                                                                                                                                                                                                                                                                                                                                                                 |                                                                                                                                                                                                                     |                                          |                                                                                                                                                                                                                                                                                                                                                                                                                                                           |
| see above                                                                                                                                                                                                                                                                                                                                                                                                                                                                                                                                                                                                                                                                                                                                                                                                                                                                                                                                                                                                                                                                                                                                                                                                                                                                                                                                                                                                                                                                                                                                                                                                                                                                                                                                                                                                                                                                                                                                                                                                                                                                                                                                                                                                                                                                                                                                                                                                                                                                                                                                                                                                                                                                                                                                                                                                                                                                                                                                                                                                                                                                                                                                                                                                                                                                                                                                                                                                                                                                                                                                                                                                                                                                                                                                                                                                                      | Virology Department, Royal Infirmary of Edinburgh, NHS Lothian / School of Biological Sciences, University of Edinburgh / Institute of Genetics and Molecular Medicine, University of Edinburgh                     | COVID-19 Genomics UK (COG-UK) Consortium | McHugh M, Dewar R, Rooke S, Gallagher M, Balcaza C, O'Toole Á, Scher E, Hill V, McCrone JT, Colquhoun R, Yu X, Jackson B, Rambaut A, Williams TC, Templeton K                                                                                                                                                                                                                                                                                             |
| EPI_ISL_742289, EPI_ISL_742298, EPI_ISL_742367, EPI_ISL_742369, EPI_ISL_742373, EPI_ISL_742380, EPI_ISL_742407, EPI_ISL_742413, EPI_ISL_742419, EPI_ISL_742427, EPI_ISL_742428, EPI_ISL_742432, EPI_ISL_742433, EPI_ISL_742435, EPI_ISL_742436, EPI_ISL_742446, EPI_ISL_742447, EPI_ISL_742448, EPI_ISL_742450, EPI_ISL_742451, EPI_ISL_742455, EPI_ISL_742456, EPI_ISL_742478, EPI_ISL_742481, EPI_ISL_742484, EPI_ISL_742493, EPI_ISL_742495, EPI_ISL_742496, EPI_ISL_742497, EPI_ISL_742501, EPI_ISL_742539, EPI_ISL_742552, EPI_ISL_742555, EPI_ISL_742560, EPI_ISL_742566, EPI_ISL_742567, EPI_ISL_742575, EPI_ISL_742578, EPI_ISL_742581, EPI_ISL_742639, EPI_ISL_742652, EPI_ISL_742655, EPI_ISL_742661, EPI_ISL_742662, EPI_ISL_742667, EPI_ISL_742682, EPI_ISL_742687, EPI_ISL_742689, EPI_ISL_742692, EPI_ISL_742698, EPI_ISL_742702, EPI_ISL_742704, EPI_ISL_742705, EPI_ISL_742710, EPI_ISL_742715, EPI_ISL_742723, EPI_ISL_742726, EPI_ISL_742732, EPI_ISL_742747, EPI_ISL_742749, EPI_ISL_742751, EPI_ISL_742754, EPI_ISL_742755, EPI_ISL_742757, EPI_ISL_742758, EPI_ISL_742761, EPI_ISL_742762, EPI_ISL_742763, EPI_ISL_742766, EPI_ISL_742769, EPI_ISL_742770, EPI_ISL_742771, EPI_ISL_742773, EPI_ISL_742774, EPI_ISL_742775, EPI_ISL_742777, EPI_ISL_742779, EPI_ISL_742781, EPI_ISL_742782, EPI_ISL_742783, EPI_ISL_742785, EPI_ISL_742787, EPI_ISL_742793, EPI_ISL_742795, EPI_ISL_742797, EPI_ISL_742799, EPI_ISL_742800, EPI_ISL_742803, EPI_ISL_742804, EPI_ISL_742805, EPI_ISL_742808, EPI_ISL_742811, EPI_ISL_742820, EPI_ISL_742825, EPI_ISL_742830, EPI_ISL_742833, EPI_ISL_742834, EPI_ISL_742848, EPI_ISL_742849, EPI_ISL_742850, EPI_ISL_742855, EPI_ISL_742857, EPI_ISL_742860, EPI_ISL_742861, EPI_ISL_742866, EPI_ISL_742879, EPI_ISL_742905, EPI_ISL_742917, EPI_ISL_742923, EPI_ISL_742927, EPI_ISL_742930, EPI_ISL_742933, EPI_ISL_742942, EPI_ISL_742943, EPI_ISL_742945, EPI_ISL_742946, EPI_ISL_742948, EPI_ISL_742957, EPI_ISL_742960, EPI_ISL_742961, EPI_ISL_742962, EPI_ISL_742969, EPI_ISL_742970, EPI_ISL_742971, EPI_ISL_742972, EPI_ISL_742973, EPI_ISL_742975, EPI_ISL_742976, EPI_ISL_742979, EPI_ISL_742980, EPI_ISL_742981, EPI_ISL_742984, EPI_ISL_742986, EPI_ISL_742992, EPI_ISL_742994, EPI_ISL_742996, EPI_ISL_743013, EPI_ISL_743018, EPI_ISL_743019, EPI_ISL_743020, EPI_ISL_743023, EPI_ISL_743031, EPI_ISL_743032, EPI_ISL_743033, EPI_ISL_743036, EPI_ISL_743041, EPI_ISL_743042, EPI_ISL_743048, EPI_ISL_743053, EPI_ISL_743054, EPI_ISL_743061, EPI_ISL_743064, EPI_ISL_743065, EPI_ISL_743067, EPI_ISL_743070, EPI_ISL_743084, EPI_ISL_743085, EPI_ISL_743088, EPI_ISL_743091, EPI_ISL_743093, EPI_ISL_743096, EPI_ISL_743099, EPI_ISL_743101, EPI_ISL_743103, EPI_ISL_743105, EPI_ISL_743109, EPI_ISL_743112, EPI_ISL_743114, EPI_ISL_743127, EPI_ISL_743140, EPI_ISL_743142, EPI_ISL_743143, EPI_ISL_743158, EPI_ISL_743164, EPI_ISL_743170, EPI_ISL_743177, EPI_ISL_743179, EPI_ISL_743193, EPI_ISL_743207, EPI_ISL_743209, EPI_ISL_743212, EPI_ISL_743213, EPI_ISL_743216, EPI_ISL_743217, EPI_ISL_743218, EPI_ISL_743222, EPI_ISL_743225, EPI_ISL_743237, EPI_ISL_743249, EPI_ISL_743260, EPI_ISL_743263, EPI_ISL_743271, EPI_ISL_743273, EPI_ISL_743279, EPI_ISL_743281, EPI_ISL_743285, EPI_ISL_743286, EPI_ISL_743287, EPI_ISL_743288, EPI_ISL_743291, EPI_ISL_743292, EPI_ISL_743296, EPI_ISL_743299, EPI_ISL_743300, EPI_ISL_743302, EPI_ISL_743304, EPI_ISL_743306, EPI_ISL_743308, EPI_ISL_743311, EPI_ISL_743314, EPI_ISL_743319, EPI_ISL_743322, EPI_ISL_743324, EPI_ISL_743325, EPI_ISL_743329, EPI_ISL_743330, EPI_ISL_743331, EPI_ISL_743333, EPI_ISL_743335, EPI_ISL_743336, EPI_ISL_743337, EPI_ISL_743340, EPI_ISL_743375, EPI_ISL_743379, EPI_ISL_743398, EPI_ISL_743412, EPI_ISL_743413, EPI_ISL_743416, EPI_ISL_743426, EPI_ISL_743427 |                                                                                                                                                                                                                     |                                          |                                                                                                                                                                                                                                                                                                                                                                                                                                                           |
| see above                                                                                                                                                                                                                                                                                                                                                                                                                                                                                                                                                                                                                                                                                                                                                                                                                                                                                                                                                                                                                                                                                                                                                                                                                                                                                                                                                                                                                                                                                                                                                                                                                                                                                                                                                                                                                                                                                                                                                                                                                                                                                                                                                                                                                                                                                                                                                                                                                                                                                                                                                                                                                                                                                                                                                                                                                                                                                                                                                                                                                                                                                                                                                                                                                                                                                                                                                                                                                                                                                                                                                                                                                                                                                                                                                                                                                      | Wales Specialist Virology Centre Sequencing lab: Pathogen Genomics Unit                                                                                                                                             | COVID-19 Genomics UK (COG-UK) Consortium | Catherine Moore, Johnathan Evans, Laura Gifford, Malorie Perry, Simon Cottrell, Angela Marchbank, Alec Birchley, Alexander Adams, Amy Gaskin, Bree Gatica-Wilcox, Jason Coombes, Joel Southgate, Lauren Gilbert, Lee Graham, Nicole Pacchiarini, Sara Kumziene-Summerhayes, Sarah Taylor, Sophie Jones, Sara Rey, Matthew Bull, Joanne Watkins, Sally Corden, Tom Connor                                                                                  |

We gratefully acknowledge the following Authors from the Originating laboratories responsible for obtaining the specimens, as well as the Submitting laboratories where the genome data were generated and shared via GISAID, on which this research is based.

All Submitters of data may be contacted directly via [www.gisaid.org](http://www.gisaid.org)

Authors are sorted alphabetically.

| Accession ID                                                                                                                                                                                                                                                                                                                                                                                                                                                                                                                                                                                                                                                                                                                                                                                                                                                                                                                                                                                                                                                                                                                                                                                                                                                                                                                                                                                                                                                                                                                                                                                                                                                                                                                                                                                                                                                                                                                                                                   | Originating Laboratory                                                                              | Submitting Laboratory                                                                               | Authors                                                                                                                                                                                                                                                                                                                                                                  |
|--------------------------------------------------------------------------------------------------------------------------------------------------------------------------------------------------------------------------------------------------------------------------------------------------------------------------------------------------------------------------------------------------------------------------------------------------------------------------------------------------------------------------------------------------------------------------------------------------------------------------------------------------------------------------------------------------------------------------------------------------------------------------------------------------------------------------------------------------------------------------------------------------------------------------------------------------------------------------------------------------------------------------------------------------------------------------------------------------------------------------------------------------------------------------------------------------------------------------------------------------------------------------------------------------------------------------------------------------------------------------------------------------------------------------------------------------------------------------------------------------------------------------------------------------------------------------------------------------------------------------------------------------------------------------------------------------------------------------------------------------------------------------------------------------------------------------------------------------------------------------------------------------------------------------------------------------------------------------------|-----------------------------------------------------------------------------------------------------|-----------------------------------------------------------------------------------------------------|--------------------------------------------------------------------------------------------------------------------------------------------------------------------------------------------------------------------------------------------------------------------------------------------------------------------------------------------------------------------------|
| EPI_ISL_743447, EPI_ISL_743529, EPI_ISL_743530, EPI_ISL_743531, EPI_ISL_743532, EPI_ISL_743534, EPI_ISL_743536, EPI_ISL_743537, EPI_ISL_743539, EPI_ISL_743540, EPI_ISL_743541, EPI_ISL_743542, EPI_ISL_743547, EPI_ISL_743549, EPI_ISL_743550, EPI_ISL_743552, EPI_ISL_743553, EPI_ISL_743554, EPI_ISL_743556, EPI_ISL_743557, EPI_ISL_743560, EPI_ISL_743563, EPI_ISL_743565, EPI_ISL_743573, EPI_ISL_743588, EPI_ISL_743590, EPI_ISL_743591, EPI_ISL_743596, EPI_ISL_743597, EPI_ISL_743600, EPI_ISL_743602, EPI_ISL_743603, EPI_ISL_743661, EPI_ISL_743664, EPI_ISL_743677, EPI_ISL_743690, EPI_ISL_743694, EPI_ISL_743695, EPI_ISL_743698, EPI_ISL_743726, EPI_ISL_743762, EPI_ISL_743780, EPI_ISL_743782, EPI_ISL_743786, EPI_ISL_743789, EPI_ISL_743792, EPI_ISL_743795, EPI_ISL_743800, EPI_ISL_743805, EPI_ISL_743812, EPI_ISL_743822, EPI_ISL_743823, EPI_ISL_743826, EPI_ISL_743827, EPI_ISL_743828, EPI_ISL_743830, EPI_ISL_743834, EPI_ISL_743838, EPI_ISL_743853, EPI_ISL_743854, EPI_ISL_743855, EPI_ISL_743856, EPI_ISL_743857, EPI_ISL_743858, EPI_ISL_743861, EPI_ISL_743866, EPI_ISL_743871, EPI_ISL_743879, EPI_ISL_743883, EPI_ISL_743886, EPI_ISL_743888, EPI_ISL_743889, EPI_ISL_743904, EPI_ISL_743907, EPI_ISL_743938, EPI_ISL_743939, EPI_ISL_743968, EPI_ISL_743990, EPI_ISL_744002, EPI_ISL_744005, EPI_ISL_744006, EPI_ISL_744007, EPI_ISL_744009, EPI_ISL_744014, EPI_ISL_744015, EPI_ISL_744017, EPI_ISL_744019, EPI_ISL_744021, EPI_ISL_744025, EPI_ISL_744027, EPI_ISL_744033, EPI_ISL_744035, EPI_ISL_744045, EPI_ISL_744046, EPI_ISL_744047, EPI_ISL_744048, EPI_ISL_744055, EPI_ISL_744056, EPI_ISL_744058, EPI_ISL_744060, EPI_ISL_744062, EPI_ISL_744065, EPI_ISL_744066, EPI_ISL_744067, EPI_ISL_744068, EPI_ISL_744070, EPI_ISL_744073, EPI_ISL_744083, EPI_ISL_744085, EPI_ISL_744093, EPI_ISL_744096, EPI_ISL_744117, EPI_ISL_744118, EPI_ISL_744119, EPI_ISL_744123, EPI_ISL_744125, EPI_ISL_744127, EPI_ISL_744128, EPI_ISL_744129 | Wales Specialist Virology Centre Sequencing lab: Pathogen Genomics Unit                             | COVID-19 Genomics UK (COG-UK) Consortium                                                            | Catherine Moore, Johnathan Evans, Laura Gifford, Malorie Perry, Simon Cottrell, Angela Marchbank, Alec Birchley, Alexander Adams, Amy Gaskin, Bree Gatica-Wilcox, Jason Coombes, Joel Southgate, Lauren Gilbert, Lee Graham, Nicole Pacchiarini, Sara Kumziene-Summerhayes, Sarah Taylor, Sophie Jones, Sara Rey, Matthew Bull, Joanne Watkins, Sally Corden, Tom Connor |
| see above                                                                                                                                                                                                                                                                                                                                                                                                                                                                                                                                                                                                                                                                                                                                                                                                                                                                                                                                                                                                                                                                                                                                                                                                                                                                                                                                                                                                                                                                                                                                                                                                                                                                                                                                                                                                                                                                                                                                                                      |                                                                                                     |                                                                                                     |                                                                                                                                                                                                                                                                                                                                                                          |
| EPI_ISL_744158, EPI_ISL_744203, EPI_ISL_744206, EPI_ISL_744280, EPI_ISL_744294, EPI_ISL_744395, EPI_ISL_744396, EPI_ISL_744400, EPI_ISL_744435, EPI_ISL_744438, EPI_ISL_744456, EPI_ISL_744780, EPI_ISL_744792, EPI_ISL_744793, EPI_ISL_744805, EPI_ISL_744809, EPI_ISL_744879, EPI_ISL_744893, EPI_ISL_744946                                                                                                                                                                                                                                                                                                                                                                                                                                                                                                                                                                                                                                                                                                                                                                                                                                                                                                                                                                                                                                                                                                                                                                                                                                                                                                                                                                                                                                                                                                                                                                                                                                                                 | Laboratoire national de santé, Microbiology, Virology                                               | Laboratoire national de santé, Microbiology, Microbial Genomics Platform                            | Anke Wienecke-Baldacchino, Catherine Ragimbeau, Jessica Tapp, Fatu Djabi, Lise Pignon, Raoul Salmon, Tamir Abdelrahman                                                                                                                                                                                                                                                   |
| see above                                                                                                                                                                                                                                                                                                                                                                                                                                                                                                                                                                                                                                                                                                                                                                                                                                                                                                                                                                                                                                                                                                                                                                                                                                                                                                                                                                                                                                                                                                                                                                                                                                                                                                                                                                                                                                                                                                                                                                      |                                                                                                     |                                                                                                     |                                                                                                                                                                                                                                                                                                                                                                          |
| EPI_ISL_745030, EPI_ISL_745031                                                                                                                                                                                                                                                                                                                                                                                                                                                                                                                                                                                                                                                                                                                                                                                                                                                                                                                                                                                                                                                                                                                                                                                                                                                                                                                                                                                                                                                                                                                                                                                                                                                                                                                                                                                                                                                                                                                                                 | Area of Virology, Serology and Virology Division (SAViD), New South Wales Health Pathology Randwick | Area of Virology, Serology and Virology Division (SAViD), New South Wales Health Pathology Randwick | Rawlinson, W.                                                                                                                                                                                                                                                                                                                                                            |
| EPI_ISL_745041, EPI_ISL_745044, EPI_ISL_745045, EPI_ISL_745046, EPI_ISL_745048, EPI_ISL_745052, EPI_ISL_745054, EPI_ISL_745061, EPI_ISL_745063, EPI_ISL_745066, EPI_ISL_745068, EPI_ISL_745071, EPI_ISL_745073, EPI_ISL_745083                                                                                                                                                                                                                                                                                                                                                                                                                                                                                                                                                                                                                                                                                                                                                                                                                                                                                                                                                                                                                                                                                                                                                                                                                                                                                                                                                                                                                                                                                                                                                                                                                                                                                                                                                 | Israel Central Virology laboratory                                                                  | Israel Central Virology laboratory                                                                  | Neta Zuckerman, Efrat Dahan Bucris, Oran Erster, Michal Mandelboim, Orna Mor, Ella Mendelson                                                                                                                                                                                                                                                                             |
| see above                                                                                                                                                                                                                                                                                                                                                                                                                                                                                                                                                                                                                                                                                                                                                                                                                                                                                                                                                                                                                                                                                                                                                                                                                                                                                                                                                                                                                                                                                                                                                                                                                                                                                                                                                                                                                                                                                                                                                                      |                                                                                                     |                                                                                                     |                                                                                                                                                                                                                                                                                                                                                                          |
| EPI_ISL_745140                                                                                                                                                                                                                                                                                                                                                                                                                                                                                                                                                                                                                                                                                                                                                                                                                                                                                                                                                                                                                                                                                                                                                                                                                                                                                                                                                                                                                                                                                                                                                                                                                                                                                                                                                                                                                                                                                                                                                                 | Tygerberg Hospital wc TBH                                                                           | National Health Laboratory Service (NHLS), Tygerberg                                                | Susan Engelbrecht, Kayla Delaney, Bronwyn Kleinhans, Houriyah Tegally, Eduan Wilkindon, Gert van Zyl, Wolfgang Preiser, Tulio de Oliveira                                                                                                                                                                                                                                |
| EPI_ISL_745187                                                                                                                                                                                                                                                                                                                                                                                                                                                                                                                                                                                                                                                                                                                                                                                                                                                                                                                                                                                                                                                                                                                                                                                                                                                                                                                                                                                                                                                                                                                                                                                                                                                                                                                                                                                                                                                                                                                                                                 | Port Nolloth Hospital                                                                               | National Health Laboratory Service (NHLS), Tygerberg                                                | Susan Engelbrecht, Kayla Delaney, Bronwyn Kleinhans, Houriyah Tegally, Eduan Wilkindon, Gert van Zyl, Wolfgang Preiser, Tulio de Oliveira                                                                                                                                                                                                                                |
| EPI_ISL_745188                                                                                                                                                                                                                                                                                                                                                                                                                                                                                                                                                                                                                                                                                                                                                                                                                                                                                                                                                                                                                                                                                                                                                                                                                                                                                                                                                                                                                                                                                                                                                                                                                                                                                                                                                                                                                                                                                                                                                                 | Nababeep Hospital                                                                                   | National Health Laboratory Service (NHLS), Tygerberg                                                | Susan Engelbrecht, Kayla Delaney, Bronwyn Kleinhans, Houriyah Tegally, Eduan Wilkindon, Gert van Zyl, Wolfgang Preiser, Tulio de Oliveira                                                                                                                                                                                                                                |
| EPI_ISL_745189                                                                                                                                                                                                                                                                                                                                                                                                                                                                                                                                                                                                                                                                                                                                                                                                                                                                                                                                                                                                                                                                                                                                                                                                                                                                                                                                                                                                                                                                                                                                                                                                                                                                                                                                                                                                                                                                                                                                                                 | Vredenburg Hospital wc VBG                                                                          | National Health Laboratory Service (NHLS), Tygerberg                                                | Susan Engelbrecht, Kayla Delaney, Bronwyn Kleinhans, Houriyah Tegally, Eduan Wilkindon, Gert van Zyl, Wolfgang Preiser, Tulio de Oliveira                                                                                                                                                                                                                                |
| EPI_ISL_745192                                                                                                                                                                                                                                                                                                                                                                                                                                                                                                                                                                                                                                                                                                                                                                                                                                                                                                                                                                                                                                                                                                                                                                                                                                                                                                                                                                                                                                                                                                                                                                                                                                                                                                                                                                                                                                                                                                                                                                 | Ospedale Di Venere                                                                                  | Istituto Zooprofilattico Sperimentale della Puglia e della Basilicata                               | Parisi A., Capozzi L., Del Sambro L., Bianco A., Chiara M., Pesole G., De Sabato L., Iacobellis M.                                                                                                                                                                                                                                                                       |
| EPI_ISL_745193                                                                                                                                                                                                                                                                                                                                                                                                                                                                                                                                                                                                                                                                                                                                                                                                                                                                                                                                                                                                                                                                                                                                                                                                                                                                                                                                                                                                                                                                                                                                                                                                                                                                                                                                                                                                                                                                                                                                                                 | Ospedale Di Venere                                                                                  | Istituto Zooprofilattico Sperimentale della Puglia e della Basilicata                               | Parisi A., Bianco A., Capozzi L., Del Sambro L., Chiara M., De Sabato L., Pesole G., Iacobellis M                                                                                                                                                                                                                                                                        |
| EPI_ISL_745202, EPI_ISL_745203, EPI_ISL_745206, EPI_ISL_745207                                                                                                                                                                                                                                                                                                                                                                                                                                                                                                                                                                                                                                                                                                                                                                                                                                                                                                                                                                                                                                                                                                                                                                                                                                                                                                                                                                                                                                                                                                                                                                                                                                                                                                                                                                                                                                                                                                                 | Lab voor klinische biologie                                                                         | Onderzoeksgroep Virologie                                                                           | Laurens Lambrechts, Nick Vereecke, Marthe Pauwels, Bruno Verhasselt, Linos Vandekerckhove, Hans Nauwynck, Sebastiaan Theuns                                                                                                                                                                                                                                              |
| EPI_ISL_745214, EPI_ISL_745216, EPI_ISL_745217                                                                                                                                                                                                                                                                                                                                                                                                                                                                                                                                                                                                                                                                                                                                                                                                                                                                                                                                                                                                                                                                                                                                                                                                                                                                                                                                                                                                                                                                                                                                                                                                                                                                                                                                                                                                                                                                                                                                 | Lab voor klinische biologie                                                                         | Onderzoeksgroep Virologie                                                                           | Nick Vereecke, Laurens Lambrechts, Marthe Pauwels, Bruno Verhasselt, Linos Vandekerckhove, Hans Nauwynck, Sebastiaan Theuns                                                                                                                                                                                                                                              |
| EPI_ISL_745222                                                                                                                                                                                                                                                                                                                                                                                                                                                                                                                                                                                                                                                                                                                                                                                                                                                                                                                                                                                                                                                                                                                                                                                                                                                                                                                                                                                                                                                                                                                                                                                                                                                                                                                                                                                                                                                                                                                                                                 | UZ Leuven, National Reference Laboratory for Coronaviruses, Laboratory Medicine, Leuven, Belgium    | KU Leuven, Rega Institute, Clinical and Epidemiological Virology                                    | Tony Wawina-Bokalanga, Joan Marti-Carerras, Bert Vanmechelen, Piet Maes                                                                                                                                                                                                                                                                                                  |
| EPI_ISL_745332, EPI_ISL_745352, EPI_ISL_745361, EPI_ISL_745363, EPI_ISL_745364, EPI_ISL_745365, EPI_ISL_745366, EPI_ISL_745379, EPI_ISL_745387, EPI_ISL_745391                                                                                                                                                                                                                                                                                                                                                                                                                                                                                                                                                                                                                                                                                                                                                                                                                                                                                                                                                                                                                                                                                                                                                                                                                                                                                                                                                                                                                                                                                                                                                                                                                                                                                                                                                                                                                 | CNR Virus des Infections Respiratoires - France SUD                                                 | CNR Virus des Infections Respiratoires - France SUD                                                 | Antonin Bal, Gregory Destras, Claudia Gonzalez, Gwendolyne Burfin, Quentin Semanas, Martine Valette, Bruno Lina, Laurence Josset                                                                                                                                                                                                                                         |
| EPI_ISL_745446, EPI_ISL_745447                                                                                                                                                                                                                                                                                                                                                                                                                                                                                                                                                                                                                                                                                                                                                                                                                                                                                                                                                                                                                                                                                                                                                                                                                                                                                                                                                                                                                                                                                                                                                                                                                                                                                                                                                                                                                                                                                                                                                 | DOHMH Corona                                                                                        | New York City Public Health Laboratory                                                              | Jade Wang, et al.                                                                                                                                                                                                                                                                                                                                                        |
| EPI_ISL_745450                                                                                                                                                                                                                                                                                                                                                                                                                                                                                                                                                                                                                                                                                                                                                                                                                                                                                                                                                                                                                                                                                                                                                                                                                                                                                                                                                                                                                                                                                                                                                                                                                                                                                                                                                                                                                                                                                                                                                                 | DOHMH Morrisania                                                                                    | New York City Public Health Laboratory                                                              | Jade Wang, et al.                                                                                                                                                                                                                                                                                                                                                        |
| EPI_ISL_745451                                                                                                                                                                                                                                                                                                                                                                                                                                                                                                                                                                                                                                                                                                                                                                                                                                                                                                                                                                                                                                                                                                                                                                                                                                                                                                                                                                                                                                                                                                                                                                                                                                                                                                                                                                                                                                                                                                                                                                 | DOHMH Central Harlem                                                                                | New York City Public Health Laboratory                                                              | Jade Wang, et al.                                                                                                                                                                                                                                                                                                                                                        |
| EPI_ISL_745454                                                                                                                                                                                                                                                                                                                                                                                                                                                                                                                                                                                                                                                                                                                                                                                                                                                                                                                                                                                                                                                                                                                                                                                                                                                                                                                                                                                                                                                                                                                                                                                                                                                                                                                                                                                                                                                                                                                                                                 | DOHMH Crown Heights                                                                                 | New York City Public Health Laboratory                                                              | Jade Wang, et al.                                                                                                                                                                                                                                                                                                                                                        |
| EPI_ISL_745456                                                                                                                                                                                                                                                                                                                                                                                                                                                                                                                                                                                                                                                                                                                                                                                                                                                                                                                                                                                                                                                                                                                                                                                                                                                                                                                                                                                                                                                                                                                                                                                                                                                                                                                                                                                                                                                                                                                                                                 | DOHMH PHL                                                                                           | New York City Public Health Laboratory                                                              | Jade Wang, et al.                                                                                                                                                                                                                                                                                                                                                        |
| EPI_ISL_745457                                                                                                                                                                                                                                                                                                                                                                                                                                                                                                                                                                                                                                                                                                                                                                                                                                                                                                                                                                                                                                                                                                                                                                                                                                                                                                                                                                                                                                                                                                                                                                                                                                                                                                                                                                                                                                                                                                                                                                 | DOHMH Chelsea                                                                                       | New York City Public Health Laboratory                                                              | Jade Wang, et al.                                                                                                                                                                                                                                                                                                                                                        |
| EPI_ISL_745459, EPI_ISL_745460, EPI_ISL_745461, EPI_ISL_745464                                                                                                                                                                                                                                                                                                                                                                                                                                                                                                                                                                                                                                                                                                                                                                                                                                                                                                                                                                                                                                                                                                                                                                                                                                                                                                                                                                                                                                                                                                                                                                                                                                                                                                                                                                                                                                                                                                                 | DOHMH Corona                                                                                        | New York City Public Health Laboratory                                                              | Jade Wang, et al.                                                                                                                                                                                                                                                                                                                                                        |
| EPI_ISL_745465                                                                                                                                                                                                                                                                                                                                                                                                                                                                                                                                                                                                                                                                                                                                                                                                                                                                                                                                                                                                                                                                                                                                                                                                                                                                                                                                                                                                                                                                                                                                                                                                                                                                                                                                                                                                                                                                                                                                                                 | DOHMH PHL                                                                                           | New York City Public Health Laboratory                                                              | Jade Wang, et al.                                                                                                                                                                                                                                                                                                                                                        |
| EPI_ISL_745466, EPI_ISL_745467                                                                                                                                                                                                                                                                                                                                                                                                                                                                                                                                                                                                                                                                                                                                                                                                                                                                                                                                                                                                                                                                                                                                                                                                                                                                                                                                                                                                                                                                                                                                                                                                                                                                                                                                                                                                                                                                                                                                                 | DOHMH Corona                                                                                        | New York City Public Health Laboratory                                                              | Jade Wang, et al.                                                                                                                                                                                                                                                                                                                                                        |
| EPI_ISL_745468                                                                                                                                                                                                                                                                                                                                                                                                                                                                                                                                                                                                                                                                                                                                                                                                                                                                                                                                                                                                                                                                                                                                                                                                                                                                                                                                                                                                                                                                                                                                                                                                                                                                                                                                                                                                                                                                                                                                                                 | DOHMH Riverside                                                                                     | New York City Public Health Laboratory                                                              | Jade Wang, et al.                                                                                                                                                                                                                                                                                                                                                        |
| EPI_ISL_745469                                                                                                                                                                                                                                                                                                                                                                                                                                                                                                                                                                                                                                                                                                                                                                                                                                                                                                                                                                                                                                                                                                                                                                                                                                                                                                                                                                                                                                                                                                                                                                                                                                                                                                                                                                                                                                                                                                                                                                 | DOHMH Central Harlem                                                                                | New York City Public Health Laboratory                                                              | Jade Wang, et al.                                                                                                                                                                                                                                                                                                                                                        |
| EPI_ISL_746827                                                                                                                                                                                                                                                                                                                                                                                                                                                                                                                                                                                                                                                                                                                                                                                                                                                                                                                                                                                                                                                                                                                                                                                                                                                                                                                                                                                                                                                                                                                                                                                                                                                                                                                                                                                                                                                                                                                                                                 | National Institute for Infectious Diseases, INMI, "L. Spallanzani" IRCCS                            | National Institute for Infectious Diseases, INMI, "L. Spallanzani" IRCCS                            | B Bartolini, C.E.M Gruber, M Rueca, F Messina, E Giombini, MR Capobianchi, A Di Caro                                                                                                                                                                                                                                                                                     |
| EPI_ISL_746828                                                                                                                                                                                                                                                                                                                                                                                                                                                                                                                                                                                                                                                                                                                                                                                                                                                                                                                                                                                                                                                                                                                                                                                                                                                                                                                                                                                                                                                                                                                                                                                                                                                                                                                                                                                                                                                                                                                                                                 | National Institute for Infectious Diseases, INMI, "L. Spallanzani" IRCCS                            | National Institute for Infectious Diseases, INMI, "L. Spallanzani" IRCCS                            | M Rueca, B Bartolini, C.E.M Gruber, F Messina, E Giombini, A Di Caro, MR Capobianchi                                                                                                                                                                                                                                                                                     |
| EPI_ISL_746976, EPI_ISL_746986, EPI_ISL_747020, EPI_ISL_747021, EPI_ISL_747022, EPI_ISL_747023, EPI_ISL_747024, EPI_ISL_747025, EPI_ISL_747026, EPI_ISL_747027, EPI_ISL_747028, EPI_ISL_747030, EPI_ISL_747031                                                                                                                                                                                                                                                                                                                                                                                                                                                                                                                                                                                                                                                                                                                                                                                                                                                                                                                                                                                                                                                                                                                                                                                                                                                                                                                                                                                                                                                                                                                                                                                                                                                                                                                                                                 | Utah Public Health Laboratory                                                                       | Utah Public Health Laboratory                                                                       | Erin Young, Kelly Oakeson, Tara Gallagher                                                                                                                                                                                                                                                                                                                                |
| see above                                                                                                                                                                                                                                                                                                                                                                                                                                                                                                                                                                                                                                                                                                                                                                                                                                                                                                                                                                                                                                                                                                                                                                                                                                                                                                                                                                                                                                                                                                                                                                                                                                                                                                                                                                                                                                                                                                                                                                      |                                                                                                     |                                                                                                     |                                                                                                                                                                                                                                                                                                                                                                          |
| EPI_ISL_747477, EPI_ISL_747481                                                                                                                                                                                                                                                                                                                                                                                                                                                                                                                                                                                                                                                                                                                                                                                                                                                                                                                                                                                                                                                                                                                                                                                                                                                                                                                                                                                                                                                                                                                                                                                                                                                                                                                                                                                                                                                                                                                                                 | ULSS 5 Polesana                                                                                     | Istituto Zooprofilattico Sperimentale delle Venezie                                                 | Adelaide Milani, Alessia Schivo, Annalisa Salviato, Erika Giorgia Quaranta, Ambra Pastori, Bianca Zecchin, Alice Fusaro, Isabella Monne, Calogero Terregino, Antonia Ricci                                                                                                                                                                                               |
| EPI_ISL_747495, EPI_ISL_747496, EPI_ISL_747498, EPI_ISL_747500, EPI_ISL_747501, EPI_ISL_747502, EPI_ISL_747504, EPI_ISL_747505, EPI_ISL_747507, EPI_ISL_747509, EPI_ISL_747510, EPI_ISL_747512, EPI_ISL_747519                                                                                                                                                                                                                                                                                                                                                                                                                                                                                                                                                                                                                                                                                                                                                                                                                                                                                                                                                                                                                                                                                                                                                                                                                                                                                                                                                                                                                                                                                                                                                                                                                                                                                                                                                                 |                                                                                                     |                                                                                                     |                                                                                                                                                                                                                                                                                                                                                                          |



EPI\_ISL\_749932, EPI\_ISL\_749933, EPI\_ISL\_749934, EPI\_ISL\_749935, EPI\_ISL\_749936, EPI\_ISL\_749937, EPI\_ISL\_749938, EPI\_ISL\_749939, EPI\_ISL\_749940, EPI\_ISL\_749941, EPI\_ISL\_749942, EPI\_ISL\_749943, EPI\_ISL\_749944, EPI\_ISL\_749945, EPI\_ISL\_749946, EPI\_ISL\_749947, EPI\_ISL\_749949, EPI\_ISL\_749950, EPI\_ISL\_749951, EPI\_ISL\_749952, EPI\_ISL\_749953, EPI\_ISL\_749955, EPI\_ISL\_749956, EPI\_ISL\_749957, EPI\_ISL\_749958, EPI\_ISL\_749959, EPI\_ISL\_749960, EPI\_ISL\_749961, EPI\_ISL\_749962, EPI\_ISL\_749963, EPI\_ISL\_749964, EPI\_ISL\_749965, EPI\_ISL\_749966, EPI\_ISL\_749967, EPI\_ISL\_749968, EPI\_ISL\_749969, EPI\_ISL\_749970, EPI\_ISL\_749971, EPI\_ISL\_749972, EPI\_ISL\_749973, EPI\_ISL\_749974, EPI\_ISL\_749975, EPI\_ISL\_749976, EPI\_ISL\_749977, EPI\_ISL\_749978, EPI\_ISL\_749979, EPI\_ISL\_749980, EPI\_ISL\_749981, EPI\_ISL\_749982, EPI\_ISL\_749983, EPI\_ISL\_749984, EPI\_ISL\_749985, EPI\_ISL\_749986, EPI\_ISL\_749987, EPI\_ISL\_749988, EPI\_ISL\_749989, EPI\_ISL\_749990, EPI\_ISL\_749991, EPI\_ISL\_749992, EPI\_ISL\_749993, EPI\_ISL\_749994, EPI\_ISL\_749995, EPI\_ISL\_749996, EPI\_ISL\_749997, EPI\_ISL\_749998, EPI\_ISL\_750000, EPI\_ISL\_750001, EPI\_ISL\_750002, EPI\_ISL\_750003, EPI\_ISL\_750004, EPI\_ISL\_750005, EPI\_ISL\_750006, EPI\_ISL\_750007, EPI\_ISL\_750008, EPI\_ISL\_750009, EPI\_ISL\_750010, EPI\_ISL\_750011, EPI\_ISL\_750012, EPI\_ISL\_750013, EPI\_ISL\_750014, EPI\_ISL\_750015, EPI\_ISL\_750016, EPI\_ISL\_750017, EPI\_ISL\_750018, EPI\_ISL\_750019, EPI\_ISL\_750020, EPI\_ISL\_750021, EPI\_ISL\_750022, EPI\_ISL\_750023, EPI\_ISL\_750024, EPI\_ISL\_750025, EPI\_ISL\_750026, EPI\_ISL\_750027, EPI\_ISL\_750029, EPI\_ISL\_750030, EPI\_ISL\_750031, EPI\_ISL\_750032, EPI\_ISL\_750033, EPI\_ISL\_750034, EPI\_ISL\_750035, EPI\_ISL\_750036, EPI\_ISL\_750037, EPI\_ISL\_750038, EPI\_ISL\_750039, EPI\_ISL\_750040, EPI\_ISL\_750041, EPI\_ISL\_750042, EPI\_ISL\_750043, EPI\_ISL\_750044, EPI\_ISL\_750045, EPI\_ISL\_750046, EPI\_ISL\_750048, EPI\_ISL\_750049, EPI\_ISL\_750050, EPI\_ISL\_750051, EPI\_ISL\_750052, EPI\_ISL\_750053, EPI\_ISL\_750054, EPI\_ISL\_750055, EPI\_ISL\_750056, EPI\_ISL\_750057, EPI\_ISL\_750058, EPI\_ISL\_750059, EPI\_ISL\_750060, EPI\_ISL\_750061, EPI\_ISL\_750062, EPI\_ISL\_750063, EPI\_ISL\_750064, EPI\_ISL\_750065, EPI\_ISL\_750066, EPI\_ISL\_750067, EPI\_ISL\_750068, EPI\_ISL\_750069, EPI\_ISL\_750070, EPI\_ISL\_750071, EPI\_ISL\_750072, EPI\_ISL\_750073, EPI\_ISL\_750074, EPI\_ISL\_750075, EPI\_ISL\_750076, EPI\_ISL\_750077, EPI\_ISL\_750078, EPI\_ISL\_750079, EPI\_ISL\_750080, EPI\_ISL\_750081, EPI\_ISL\_750082, EPI\_ISL\_750083, EPI\_ISL\_750084, EPI\_ISL\_750085, EPI\_ISL\_750086, EPI\_ISL\_750087, EPI\_ISL\_750088, EPI\_ISL\_750089, EPI\_ISL\_750090, EPI\_ISL\_750091, EPI\_ISL\_750092, EPI\_ISL\_750093, EPI\_ISL\_750094, EPI\_ISL\_750095, EPI\_ISL\_750096, EPI\_ISL\_750097, EPI\_ISL\_750098, EPI\_ISL\_750099, EPI\_ISL\_750100, EPI\_ISL\_750101, EPI\_ISL\_750102, EPI\_ISL\_750103, EPI\_ISL\_750104, EPI\_ISL\_750105, EPI\_ISL\_750106, EPI\_ISL\_750107, EPI\_ISL\_750108, EPI\_ISL\_750109, EPI\_ISL\_750110, EPI\_ISL\_750111, EPI\_ISL\_750112, EPI\_ISL\_750113, EPI\_ISL\_750114, EPI\_ISL\_750115, EPI\_ISL\_750116, EPI\_ISL\_750117, EPI\_ISL\_750118, EPI\_ISL\_750119, EPI\_ISL\_750120, EPI\_ISL\_750121, EPI\_ISL\_750122, EPI\_ISL\_750123, EPI\_ISL\_750124, EPI\_ISL\_750125, EPI\_ISL\_750126, EPI\_ISL\_750127, EPI\_ISL\_750128, EPI\_ISL\_750129, EPI\_ISL\_750130, EPI\_ISL\_750131, EPI\_ISL\_750132, EPI\_ISL\_750133, EPI\_ISL\_750134, EPI\_ISL\_750135, EPI\_ISL\_750136, EPI\_ISL\_750137, EPI\_ISL\_750138, EPI\_ISL\_750139, EPI\_ISL\_750140, EPI\_ISL\_750141, EPI\_ISL\_750142, EPI\_ISL\_750143, EPI\_ISL\_750144, EPI\_ISL\_750145, EPI\_ISL\_750146, EPI\_ISL\_750147, EPI\_ISL\_750148, EPI\_ISL\_750149, EPI\_ISL\_750150, EPI\_ISL\_750151, EPI\_ISL\_750152, EPI\_ISL\_750153, EPI\_ISL\_750154, EPI\_ISL\_750155, EPI\_ISL\_750156, EPI\_ISL\_750157, EPI\_ISL\_750158, EPI\_ISL\_750159, EPI\_ISL\_750160, EPI\_ISL\_750161, EPI\_ISL\_750162, EPI\_ISL\_750163, EPI\_ISL\_750164, EPI\_ISL\_750165, EPI\_ISL\_750166, EPI\_ISL\_750167, EPI\_ISL\_750168, EPI\_ISL\_750169, EPI\_ISL\_750170, EPI\_ISL\_750171, EPI\_ISL\_750172, EPI\_ISL\_750173, EPI\_ISL\_750174, EPI\_ISL\_750175, EPI\_ISL\_750176, EPI\_ISL\_750177, EPI\_ISL\_750178, EPI\_ISL\_750179, EPI\_ISL\_750180, EPI\_ISL\_750181, EPI\_ISL\_750182, EPI\_ISL\_750183

|                                                                |                                                                                                          |                                                                                                                            |                                                                                                                                                                             |
|----------------------------------------------------------------|----------------------------------------------------------------------------------------------------------|----------------------------------------------------------------------------------------------------------------------------|-----------------------------------------------------------------------------------------------------------------------------------------------------------------------------|
| see above                                                      | Department of Virus and Microbiological Special Diagnostics, Statens Serum Institut, Copenhagen, Denmark | Albertyn Lab, Department of Chemistry and Bioscience, Aalborg University, Denmark                                          | Danish Covid-19 Genome Consortium                                                                                                                                           |
| EPI_ISL_751192                                                 | Limmattal Hospital                                                                                       | Institute of Medical Virology, University of Zurich                                                                        | Stefan Schmutz, Kevin Steiner, Verena Kufner, Maryam Zaheri, Gabriela Ziltener, Jürg Böni, Michael Huber, Alexandra Trkola, Roberto Buonamano                               |
| EPI_ISL_751196, EPI_ISL_751197, EPI_ISL_751199, EPI_ISL_751200 | Dienststelle Gesundheit und Sport Kanton Luzern                                                          | Institute of Medical Virology, University of Zurich                                                                        | Stefan Schmutz, Kevin Steiner, Verena Kufner, Maryam Zaheri, Gabriela Ziltener, Jürg Böni, Michael Huber, Alexandra Trkola, Claudia Schmutz, Eva Spieler                    |
| EPI_ISL_751555                                                 | WY Public Health Laboratory                                                                              | Genomics and Discovery, Respiratory Viruses Branch, Division of Viral Diseases, Centers for Disease Control and Prevention | Krista Queen, Yan Li, Ying Tao, Jing Zhang, Anna Uehara, Anna Montmayeur, Clinton R. Paden, Peter W. Cook, Rachel Marine, Mili Sheth, Haibin Wang, Justin Lee, Suxiang Tong |
| EPI_ISL_751557                                                 | NV State Public Health Laboratory                                                                        | Genomics and Discovery, Respiratory Viruses Branch, Division of Viral Diseases, Centers for Disease Control and Prevention | Krista Queen, Yan Li, Ying Tao, Jing Zhang, Anna Uehara, Anna Montmayeur, Clinton R. Paden, Peter W. Cook, Rachel Marine, Mili Sheth, Haibin Wang, Justin Lee, Suxiang Tong |
| EPI_ISL_751570                                                 | KY State Public Health Lab                                                                               | Genomics and Discovery, Respiratory Viruses Branch, Division of Viral Diseases, Centers for Disease Control and Prevention | Krista Queen, Yan Li, Ying Tao, Jing Zhang, Anna Uehara, Anna Montmayeur, Clinton R. Paden, Peter W. Cook, Rachel Marine, Mili Sheth, Haibin Wang, Justin Lee, Suxiang Tong |
| EPI_ISL_751589                                                 | WVDHHR - Office of Laboratory Services                                                                   | Genomics and Discovery, Respiratory Viruses Branch, Division of Viral Diseases, Centers for Disease Control and Prevention | Krista Queen, Yan Li, Ying Tao, Jing Zhang, Anna Uehara, Anna Montmayeur, Clinton R. Paden, Peter W. Cook, Rachel Marine, Mili Sheth, Haibin Wang, Justin Lee, Suxiang Tong |
| EPI_ISL_751591                                                 | WY Public Health Laboratory                                                                              | Genomics and Discovery, Respiratory Viruses Branch, Division of Viral Diseases, Centers for Disease Control and Prevention | Krista Queen, Yan Li, Ying Tao, Jing Zhang, Anna Uehara, Anna Montmayeur, Clinton R. Paden, Peter W. Cook, Rachel Marine, Mili Sheth, Haibin Wang, Justin Lee, Suxiang Tong |
| EPI_ISL_751596                                                 | KY State Public Health Lab                                                                               | Genomics and Discovery, Respiratory Viruses Branch, Division of Viral Diseases, Centers for Disease Control and Prevention | Krista Queen, Yan Li, Ying Tao, Jing Zhang, Anna Uehara, Anna Montmayeur, Clinton R. Paden, Peter W. Cook, Rachel Marine, Mili Sheth, Haibin Wang, Justin Lee, Suxiang Tong |
| EPI_ISL_751600                                                 | IN State Department of Health Laboratory Services                                                        | Genomics and Discovery, Respiratory Viruses Branch, Division of Viral Diseases, Centers for Disease Control and Prevention | Krista Queen, Yan Li, Ying Tao, Jing Zhang, Anna Uehara, Anna Montmayeur, Clinton R. Paden, Peter W. Cook, Rachel Marine, Mili Sheth, Haibin Wang, Justin Lee, Suxiang Tong |
| EPI_ISL_751611                                                 | SC Dept of Health and Env. Control-Bureau of Laboratories                                                | Genomics and Discovery, Respiratory Viruses Branch, Division of Viral Diseases, Centers for Disease Control and Prevention | Krista Queen, Yan Li, Ying Tao, Jing Zhang, Anna Uehara, Anna Montmayeur, Clinton R. Paden, Peter W. Cook, Rachel Marine, Mili Sheth, Haibin Wang, Justin Lee, Suxiang Tong |

[illegible]



|                                                                                                                                                                                                                                                                                                                                                                                                                                                                                                                                                                                                                                                                                                                                                                                                                                                                                                                                                                                                                                                                                                                                                                                                                                                                                                                                                                                                                                                                                                                                                                                                                                                                                                                                                                                                                                                                                                                                                                                |                                                                  |                                                                                                                            |                                                                                                                                                                            |
|--------------------------------------------------------------------------------------------------------------------------------------------------------------------------------------------------------------------------------------------------------------------------------------------------------------------------------------------------------------------------------------------------------------------------------------------------------------------------------------------------------------------------------------------------------------------------------------------------------------------------------------------------------------------------------------------------------------------------------------------------------------------------------------------------------------------------------------------------------------------------------------------------------------------------------------------------------------------------------------------------------------------------------------------------------------------------------------------------------------------------------------------------------------------------------------------------------------------------------------------------------------------------------------------------------------------------------------------------------------------------------------------------------------------------------------------------------------------------------------------------------------------------------------------------------------------------------------------------------------------------------------------------------------------------------------------------------------------------------------------------------------------------------------------------------------------------------------------------------------------------------------------------------------------------------------------------------------------------------|------------------------------------------------------------------|----------------------------------------------------------------------------------------------------------------------------|----------------------------------------------------------------------------------------------------------------------------------------------------------------------------|
| Prevention                                                                                                                                                                                                                                                                                                                                                                                                                                                                                                                                                                                                                                                                                                                                                                                                                                                                                                                                                                                                                                                                                                                                                                                                                                                                                                                                                                                                                                                                                                                                                                                                                                                                                                                                                                                                                                                                                                                                                                     |                                                                  |                                                                                                                            |                                                                                                                                                                            |
| EPI_ISL_751714                                                                                                                                                                                                                                                                                                                                                                                                                                                                                                                                                                                                                                                                                                                                                                                                                                                                                                                                                                                                                                                                                                                                                                                                                                                                                                                                                                                                                                                                                                                                                                                                                                                                                                                                                                                                                                                                                                                                                                 | NV State Public Health Laboratory                                | Genomics and Discovery, Respiratory Viruses Branch, Division of Viral Diseases, Centers for Disease Control and Prevention | Krista Queen, Yan Li, Ying Tao, Jing Zhang, Anna Uehara, Anna Montmayeur, Clinton R. Paden, Peter W. Cook,Rachel Marine, Mili Sheth, Haibin Wang, Justin Lee, Suxiang Tong |
| EPI_ISL_751718                                                                                                                                                                                                                                                                                                                                                                                                                                                                                                                                                                                                                                                                                                                                                                                                                                                                                                                                                                                                                                                                                                                                                                                                                                                                                                                                                                                                                                                                                                                                                                                                                                                                                                                                                                                                                                                                                                                                                                 | SC Dept of Health and Env. Control-Bureau of Laboratories        | Genomics and Discovery, Respiratory Viruses Branch, Division of Viral Diseases, Centers for Disease Control and Prevention | Krista Queen, Yan Li, Ying Tao, Jing Zhang, Anna Uehara, Anna Montmayeur, Clinton R. Paden, Peter W. Cook,Rachel Marine, Mili Sheth, Haibin Wang, Justin Lee, Suxiang Tong |
| EPI_ISL_751722                                                                                                                                                                                                                                                                                                                                                                                                                                                                                                                                                                                                                                                                                                                                                                                                                                                                                                                                                                                                                                                                                                                                                                                                                                                                                                                                                                                                                                                                                                                                                                                                                                                                                                                                                                                                                                                                                                                                                                 | LA Office of Public Health Laboratories                          | Genomics and Discovery, Respiratory Viruses Branch, Division of Viral Diseases, Centers for Disease Control and Prevention | Krista Queen, Yan Li, Ying Tao, Jing Zhang, Anna Uehara, Anna Montmayeur, Clinton R. Paden, Peter W. Cook,Rachel Marine, Mili Sheth, Haibin Wang, Justin Lee, Suxiang Tong |
| EPI_ISL_751728                                                                                                                                                                                                                                                                                                                                                                                                                                                                                                                                                                                                                                                                                                                                                                                                                                                                                                                                                                                                                                                                                                                                                                                                                                                                                                                                                                                                                                                                                                                                                                                                                                                                                                                                                                                                                                                                                                                                                                 | CO Dept. of Public Health and Environment, Lab Services Division | Genomics and Discovery, Respiratory Viruses Branch, Division of Viral Diseases, Centers for Disease Control and Prevention | Krista Queen, Yan Li, Ying Tao, Jing Zhang, Anna Uehara, Anna Montmayeur, Clinton R. Paden, Peter W. Cook,Rachel Marine, Mili Sheth, Haibin Wang, Justin Lee, Suxiang Tong |
| EPI_ISL_751736                                                                                                                                                                                                                                                                                                                                                                                                                                                                                                                                                                                                                                                                                                                                                                                                                                                                                                                                                                                                                                                                                                                                                                                                                                                                                                                                                                                                                                                                                                                                                                                                                                                                                                                                                                                                                                                                                                                                                                 | NV State Public Health Laboratory                                | Genomics and Discovery, Respiratory Viruses Branch, Division of Viral Diseases, Centers for Disease Control and Prevention | Krista Queen, Yan Li, Ying Tao, Jing Zhang, Anna Uehara, Anna Montmayeur, Clinton R. Paden, Peter W. Cook,Rachel Marine, Mili Sheth, Haibin Wang, Justin Lee, Suxiang Tong |
| EPI_ISL_751738                                                                                                                                                                                                                                                                                                                                                                                                                                                                                                                                                                                                                                                                                                                                                                                                                                                                                                                                                                                                                                                                                                                                                                                                                                                                                                                                                                                                                                                                                                                                                                                                                                                                                                                                                                                                                                                                                                                                                                 | MT Public Health Laboratory                                      | Genomics and Discovery, Respiratory Viruses Branch, Division of Viral Diseases, Centers for Disease Control and Prevention | Krista Queen, Yan Li, Ying Tao, Jing Zhang, Anna Uehara, Anna Montmayeur, Clinton R. Paden, Peter W. Cook,Rachel Marine, Mili Sheth, Haibin Wang, Justin Lee, Suxiang Tong |
| EPI_ISL_751743                                                                                                                                                                                                                                                                                                                                                                                                                                                                                                                                                                                                                                                                                                                                                                                                                                                                                                                                                                                                                                                                                                                                                                                                                                                                                                                                                                                                                                                                                                                                                                                                                                                                                                                                                                                                                                                                                                                                                                 | WY Public Health Laboratory                                      | Genomics and Discovery, Respiratory Viruses Branch, Division of Viral Diseases, Centers for Disease Control and Prevention | Krista Queen, Yan Li, Ying Tao, Jing Zhang, Anna Uehara, Anna Montmayeur, Clinton R. Paden, Peter W. Cook,Rachel Marine, Mili Sheth, Haibin Wang, Justin Lee, Suxiang Tong |
| EPI_ISL_751746                                                                                                                                                                                                                                                                                                                                                                                                                                                                                                                                                                                                                                                                                                                                                                                                                                                                                                                                                                                                                                                                                                                                                                                                                                                                                                                                                                                                                                                                                                                                                                                                                                                                                                                                                                                                                                                                                                                                                                 | WVDHHR - Office of Laboratory Services                           | Genomics and Discovery, Respiratory Viruses Branch, Division of Viral Diseases, Centers for Disease Control and Prevention | Krista Queen, Yan Li, Ying Tao, Jing Zhang, Anna Uehara, Anna Montmayeur, Clinton R. Paden, Peter W. Cook,Rachel Marine, Mili Sheth, Haibin Wang, Justin Lee, Suxiang Tong |
| EPI_ISL_751749                                                                                                                                                                                                                                                                                                                                                                                                                                                                                                                                                                                                                                                                                                                                                                                                                                                                                                                                                                                                                                                                                                                                                                                                                                                                                                                                                                                                                                                                                                                                                                                                                                                                                                                                                                                                                                                                                                                                                                 | TX DSHS, Lab Services Section MC 1947                            | Genomics and Discovery, Respiratory Viruses Branch, Division of Viral Diseases, Centers for Disease Control and Prevention | Krista Queen, Yan Li, Ying Tao, Jing Zhang, Anna Uehara, Anna Montmayeur, Clinton R. Paden, Peter W. Cook,Rachel Marine, Mili Sheth, Haibin Wang, Justin Lee, Suxiang Tong |
| EPI_ISL_751751                                                                                                                                                                                                                                                                                                                                                                                                                                                                                                                                                                                                                                                                                                                                                                                                                                                                                                                                                                                                                                                                                                                                                                                                                                                                                                                                                                                                                                                                                                                                                                                                                                                                                                                                                                                                                                                                                                                                                                 | RI State Health Laboratories                                     | Genomics and Discovery, Respiratory Viruses Branch, Division of Viral Diseases, Centers for Disease Control and Prevention | Krista Queen, Yan Li, Ying Tao, Jing Zhang, Anna Uehara, Anna Montmayeur, Clinton R. Paden, Peter W. Cook,Rachel Marine, Mili Sheth, Haibin Wang, Justin Lee, Suxiang Tong |
| EPI_ISL_751754                                                                                                                                                                                                                                                                                                                                                                                                                                                                                                                                                                                                                                                                                                                                                                                                                                                                                                                                                                                                                                                                                                                                                                                                                                                                                                                                                                                                                                                                                                                                                                                                                                                                                                                                                                                                                                                                                                                                                                 | KY State Public Health Lab                                       | Genomics and Discovery, Respiratory Viruses Branch, Division of Viral Diseases, Centers for Disease Control and Prevention | Krista Queen, Yan Li, Ying Tao, Jing Zhang, Anna Uehara, Anna Montmayeur, Clinton R. Paden, Peter W. Cook,Rachel Marine, Mili Sheth, Haibin Wang, Justin Lee, Suxiang Tong |
| EPI_ISL_751757                                                                                                                                                                                                                                                                                                                                                                                                                                                                                                                                                                                                                                                                                                                                                                                                                                                                                                                                                                                                                                                                                                                                                                                                                                                                                                                                                                                                                                                                                                                                                                                                                                                                                                                                                                                                                                                                                                                                                                 | RI State Health Laboratories                                     | Genomics and Discovery, Respiratory Viruses Branch, Division of Viral Diseases, Centers for Disease Control and Prevention | Krista Queen, Yan Li, Ying Tao, Jing Zhang, Anna Uehara, Anna Montmayeur, Clinton R. Paden, Peter W. Cook,Rachel Marine, Mili Sheth, Haibin Wang, Justin Lee, Suxiang Tong |
| EPI_ISL_751763, EPI_ISL_751766                                                                                                                                                                                                                                                                                                                                                                                                                                                                                                                                                                                                                                                                                                                                                                                                                                                                                                                                                                                                                                                                                                                                                                                                                                                                                                                                                                                                                                                                                                                                                                                                                                                                                                                                                                                                                                                                                                                                                 | CO Dept. of Public Health and Environment, Lab Services Division | Genomics and Discovery, Respiratory Viruses Branch, Division of Viral Diseases, Centers for Disease Control and Prevention | Krista Queen, Yan Li, Ying Tao, Jing Zhang, Anna Uehara, Anna Montmayeur, Clinton R. Paden, Peter W. Cook,Rachel Marine, Mili Sheth, Haibin Wang, Justin Lee, Suxiang Tong |
| EPI_ISL_751771                                                                                                                                                                                                                                                                                                                                                                                                                                                                                                                                                                                                                                                                                                                                                                                                                                                                                                                                                                                                                                                                                                                                                                                                                                                                                                                                                                                                                                                                                                                                                                                                                                                                                                                                                                                                                                                                                                                                                                 | MD DOH Laboratories Administration                               | Genomics and Discovery, Respiratory Viruses Branch, Division of Viral Diseases, Centers for Disease Control and Prevention | Krista Queen, Yan Li, Ying Tao, Jing Zhang, Anna Uehara, Anna Montmayeur, Clinton R. Paden, Peter W. Cook,Rachel Marine, Mili Sheth, Haibin Wang, Justin Lee, Suxiang Tong |
| EPI_ISL_751773                                                                                                                                                                                                                                                                                                                                                                                                                                                                                                                                                                                                                                                                                                                                                                                                                                                                                                                                                                                                                                                                                                                                                                                                                                                                                                                                                                                                                                                                                                                                                                                                                                                                                                                                                                                                                                                                                                                                                                 | NJ Public Health and Environmental Laboratories                  | Genomics and Discovery, Respiratory Viruses Branch, Division of Viral Diseases, Centers for Disease Control and Prevention | Krista Queen, Yan Li, Ying Tao, Jing Zhang, Anna Uehara, Anna Montmayeur, Clinton R. Paden, Peter W. Cook,Rachel Marine, Mili Sheth, Haibin Wang, Justin Lee, Suxiang Tong |
| EPI_ISL_751778                                                                                                                                                                                                                                                                                                                                                                                                                                                                                                                                                                                                                                                                                                                                                                                                                                                                                                                                                                                                                                                                                                                                                                                                                                                                                                                                                                                                                                                                                                                                                                                                                                                                                                                                                                                                                                                                                                                                                                 | NV State Public Health Laboratory                                | Genomics and Discovery, Respiratory Viruses Branch, Division of Viral Diseases, Centers for Disease Control and Prevention | Krista Queen, Yan Li, Ying Tao, Jing Zhang, Anna Uehara, Anna Montmayeur, Clinton R. Paden, Peter W. Cook,Rachel Marine, Mili Sheth, Haibin Wang, Justin Lee, Suxiang Tong |
| EPI_ISL_751785, EPI_ISL_751786                                                                                                                                                                                                                                                                                                                                                                                                                                                                                                                                                                                                                                                                                                                                                                                                                                                                                                                                                                                                                                                                                                                                                                                                                                                                                                                                                                                                                                                                                                                                                                                                                                                                                                                                                                                                                                                                                                                                                 | WVDHHR - Office of Laboratory Services                           | Genomics and Discovery, Respiratory Viruses Branch, Division of Viral Diseases, Centers for Disease Control and Prevention | Krista Queen, Yan Li, Ying Tao, Jing Zhang, Anna Uehara, Anna Montmayeur, Clinton R. Paden, Peter W. Cook,Rachel Marine, Mili Sheth, Haibin Wang, Justin Lee, Suxiang Tong |
| EPI_ISL_751790                                                                                                                                                                                                                                                                                                                                                                                                                                                                                                                                                                                                                                                                                                                                                                                                                                                                                                                                                                                                                                                                                                                                                                                                                                                                                                                                                                                                                                                                                                                                                                                                                                                                                                                                                                                                                                                                                                                                                                 | RI State Health Laboratories                                     | Genomics and Discovery, Respiratory Viruses Branch, Division of Viral Diseases, Centers for Disease Control and Prevention | Krista Queen, Yan Li, Ying Tao, Jing Zhang, Anna Uehara, Anna Montmayeur, Clinton R. Paden, Peter W. Cook,Rachel Marine, Mili Sheth, Haibin Wang, Justin Lee, Suxiang Tong |
| EPI_ISL_751805, EPI_ISL_751806, EPI_ISL_751807, EPI_ISL_751808, EPI_ISL_751810, EPI_ISL_751811, EPI_ISL_751812, EPI_ISL_751813, EPI_ISL_751814, EPI_ISL_751816, EPI_ISL_751817, EPI_ISL_751818, EPI_ISL_751819, EPI_ISL_751820, EPI_ISL_751822, EPI_ISL_751823, EPI_ISL_751824, EPI_ISL_751828, EPI_ISL_751832, EPI_ISL_751833, EPI_ISL_751834, EPI_ISL_751838, EPI_ISL_751840, EPI_ISL_751841, EPI_ISL_751842, EPI_ISL_751843, EPI_ISL_751844, EPI_ISL_751845, EPI_ISL_751846                                                                                                                                                                                                                                                                                                                                                                                                                                                                                                                                                                                                                                                                                                                                                                                                                                                                                                                                                                                                                                                                                                                                                                                                                                                                                                                                                                                                                                                                                                 |                                                                  |                                                                                                                            |                                                                                                                                                                            |
| see above                                                                                                                                                                                                                                                                                                                                                                                                                                                                                                                                                                                                                                                                                                                                                                                                                                                                                                                                                                                                                                                                                                                                                                                                                                                                                                                                                                                                                                                                                                                                                                                                                                                                                                                                                                                                                                                                                                                                                                      | New Mexico Department of Health Scientific Laboratory            | New Mexico Department of Health Scientific Laboratory                                                                      | D'eldra Malone, Ellie Johnson, Anastacia Griego-Fisher                                                                                                                     |
| EPI_ISL_752598                                                                                                                                                                                                                                                                                                                                                                                                                                                                                                                                                                                                                                                                                                                                                                                                                                                                                                                                                                                                                                                                                                                                                                                                                                                                                                                                                                                                                                                                                                                                                                                                                                                                                                                                                                                                                                                                                                                                                                 | SA Pathology                                                     | SA Pathology                                                                                                               | Lex Leong, Julien Soubrier, Chuan Kok Lim, Song Gao, Mark Turra, Karin Kassahn, Ivan Bastian, Geoff Higgins                                                                |
| EPI_ISL_753178, EPI_ISL_753179, EPI_ISL_753180, EPI_ISL_753181, EPI_ISL_753182, EPI_ISL_753183, EPI_ISL_753184, EPI_ISL_753185, EPI_ISL_753186, EPI_ISL_753187, EPI_ISL_753188, EPI_ISL_753189, EPI_ISL_753190, EPI_ISL_753191, EPI_ISL_753202, EPI_ISL_753203, EPI_ISL_753205, EPI_ISL_753206, EPI_ISL_753207, EPI_ISL_753208, EPI_ISL_753209, EPI_ISL_753211, EPI_ISL_753212, EPI_ISL_753216, EPI_ISL_753217, EPI_ISL_753219, EPI_ISL_753225, EPI_ISL_753226, EPI_ISL_753228, EPI_ISL_753229, EPI_ISL_753230, EPI_ISL_753231, EPI_ISL_753232, EPI_ISL_753233, EPI_ISL_753236, EPI_ISL_753237, EPI_ISL_753238, EPI_ISL_753239, EPI_ISL_753241, EPI_ISL_753242, EPI_ISL_753243, EPI_ISL_753244, EPI_ISL_753246, EPI_ISL_753248, EPI_ISL_753249, EPI_ISL_753251, EPI_ISL_753252, EPI_ISL_753253, EPI_ISL_753254, EPI_ISL_753255, EPI_ISL_753256, EPI_ISL_753257, EPI_ISL_753258, EPI_ISL_753259, EPI_ISL_753260, EPI_ISL_753261                                                                                                                                                                                                                                                                                                                                                                                                                                                                                                                                                                                                                                                                                                                                                                                                                                                                                                                                                                                                                                                 |                                                                  |                                                                                                                            |                                                                                                                                                                            |
| see above                                                                                                                                                                                                                                                                                                                                                                                                                                                                                                                                                                                                                                                                                                                                                                                                                                                                                                                                                                                                                                                                                                                                                                                                                                                                                                                                                                                                                                                                                                                                                                                                                                                                                                                                                                                                                                                                                                                                                                      | State Laboratories Division, Hawaii State Department of Health   | State Laboratories Division, Hawaii State Department of Health                                                             | Pamela O'Brien, Sabrina Diemert, Drew Kuwazaki, Razvan Sultana, Edward Desmond                                                                                             |
| EPI_ISL_753559, EPI_ISL_753561, EPI_ISL_753562, EPI_ISL_753563, EPI_ISL_753565, EPI_ISL_753566, EPI_ISL_753567, EPI_ISL_753568, EPI_ISL_753569, EPI_ISL_753570, EPI_ISL_753571, EPI_ISL_753572, EPI_ISL_753573, EPI_ISL_753574, EPI_ISL_753575, EPI_ISL_753576, EPI_ISL_753577, EPI_ISL_753578, EPI_ISL_753579, EPI_ISL_753580, EPI_ISL_753581, EPI_ISL_753582, EPI_ISL_753583, EPI_ISL_753584, EPI_ISL_753585, EPI_ISL_753586, EPI_ISL_753587, EPI_ISL_753588, EPI_ISL_753589, EPI_ISL_753590, EPI_ISL_753591, EPI_ISL_753592, EPI_ISL_753593, EPI_ISL_753594, EPI_ISL_753595, EPI_ISL_753596, EPI_ISL_753597, EPI_ISL_753598, EPI_ISL_753599, EPI_ISL_753600, EPI_ISL_753601, EPI_ISL_753602, EPI_ISL_753603, EPI_ISL_753604, EPI_ISL_753605, EPI_ISL_753606, EPI_ISL_753607, EPI_ISL_753608, EPI_ISL_753609, EPI_ISL_753610, EPI_ISL_753611, EPI_ISL_753612, EPI_ISL_753613, EPI_ISL_753614, EPI_ISL_753615, EPI_ISL_753616, EPI_ISL_753617, EPI_ISL_753618, EPI_ISL_753619, EPI_ISL_753620, EPI_ISL_753621, EPI_ISL_753622, EPI_ISL_753623, EPI_ISL_753624, EPI_ISL_753625, EPI_ISL_753626, EPI_ISL_753628, EPI_ISL_753629, EPI_ISL_753630, EPI_ISL_753631, EPI_ISL_753632, EPI_ISL_753633, EPI_ISL_753635, EPI_ISL_753636, EPI_ISL_753637, EPI_ISL_753638, EPI_ISL_753639, EPI_ISL_753640, EPI_ISL_753641, EPI_ISL_753642, EPI_ISL_753653, EPI_ISL_753654, EPI_ISL_753655, EPI_ISL_753656, EPI_ISL_753657, EPI_ISL_753658, EPI_ISL_753659, EPI_ISL_753660, EPI_ISL_753661, EPI_ISL_753662, EPI_ISL_753663, EPI_ISL_753664, EPI_ISL_753665, EPI_ISL_753666, EPI_ISL_753667, EPI_ISL_753668, EPI_ISL_753669, EPI_ISL_753670, EPI_ISL_753671, EPI_ISL_753672, EPI_ISL_753673, EPI_ISL_753674, EPI_ISL_753675, EPI_ISL_753676, EPI_ISL_753677, EPI_ISL_753678, EPI_ISL_753679, EPI_ISL_753681, EPI_ISL_753682, EPI_ISL_753683, EPI_ISL_753684, EPI_ISL_753685, EPI_ISL_753686, EPI_ISL_753687, EPI_ISL_753688, EPI_ISL_753689, EPI_ISL_753690, EPI_ISL_753691, EPI_ISL_753692 |                                                                  |                                                                                                                            |                                                                                                                                                                            |
| see above                                                                                                                                                                                                                                                                                                                                                                                                                                                                                                                                                                                                                                                                                                                                                                                                                                                                                                                                                                                                                                                                                                                                                                                                                                                                                                                                                                                                                                                                                                                                                                                                                                                                                                                                                                                                                                                                                                                                                                      | Clinical virology Laboratory, Children's Hospital Los Angeles    | Center for Personalized Medicine, Children's Hospital Los Angeles                                                          | Gai et al                                                                                                                                                                  |

|                                                                                                                                                                                                                                                                                                                                                                                                                                                                                                                                                                                                                                                                                                                                                                                                                                                |                                                                                             |                                                                                                                            |                                                                                                                                                                                                                                                                                                                                                                                                                                                                                                                                                                                             |
|------------------------------------------------------------------------------------------------------------------------------------------------------------------------------------------------------------------------------------------------------------------------------------------------------------------------------------------------------------------------------------------------------------------------------------------------------------------------------------------------------------------------------------------------------------------------------------------------------------------------------------------------------------------------------------------------------------------------------------------------------------------------------------------------------------------------------------------------|---------------------------------------------------------------------------------------------|----------------------------------------------------------------------------------------------------------------------------|---------------------------------------------------------------------------------------------------------------------------------------------------------------------------------------------------------------------------------------------------------------------------------------------------------------------------------------------------------------------------------------------------------------------------------------------------------------------------------------------------------------------------------------------------------------------------------------------|
| EPI_ISL_754059                                                                                                                                                                                                                                                                                                                                                                                                                                                                                                                                                                                                                                                                                                                                                                                                                                 | Specialized Lab for COVID-19 Detection, Department of Genetic Engineering and Biotechnology | Specialized Lab for COVID-19 Detection, Department of Genetic Engineering and Biotechnology                                | Md. Nazmul Hasan, Md. Akkas Ali, Shamsul H. Prodhan, Hammadul Hoque , Nurnabi Azad Jewel, Md Mohsin Bapary, Diptha Chakraborty                                                                                                                                                                                                                                                                                                                                                                                                                                                              |
| EPI_ISL_754110, EPI_ISL_754111, EPI_ISL_754113, EPI_ISL_754120, EPI_ISL_754123                                                                                                                                                                                                                                                                                                                                                                                                                                                                                                                                                                                                                                                                                                                                                                 | UCLA Clinical Micro Lab                                                                     | Los Angeles County PHL                                                                                                     | P. Hemarajata et al.                                                                                                                                                                                                                                                                                                                                                                                                                                                                                                                                                                        |
| EPI_ISL_754124, EPI_ISL_754127                                                                                                                                                                                                                                                                                                                                                                                                                                                                                                                                                                                                                                                                                                                                                                                                                 | USC Clinical Lab                                                                            | Los Angeles County PHL                                                                                                     | P. Hemarajata et al.                                                                                                                                                                                                                                                                                                                                                                                                                                                                                                                                                                        |
| EPI_ISL_754130, EPI_ISL_754131                                                                                                                                                                                                                                                                                                                                                                                                                                                                                                                                                                                                                                                                                                                                                                                                                 | Los Angeles County PHL                                                                      | Los Angeles County PHL                                                                                                     | P. Hemarajata et al.                                                                                                                                                                                                                                                                                                                                                                                                                                                                                                                                                                        |
| EPI_ISL_754133, EPI_ISL_754135                                                                                                                                                                                                                                                                                                                                                                                                                                                                                                                                                                                                                                                                                                                                                                                                                 | USC Clinical Lab                                                                            | Los Angeles County PHL                                                                                                     | P. Hemarajata et al.                                                                                                                                                                                                                                                                                                                                                                                                                                                                                                                                                                        |
| EPI_ISL_754142, EPI_ISL_754147, EPI_ISL_754148, EPI_ISL_754149, EPI_ISL_754150, EPI_ISL_754151, EPI_ISL_754158, EPI_ISL_754159, EPI_ISL_754160, EPI_ISL_754163, EPI_ISL_754164, EPI_ISL_754165, EPI_ISL_754166, EPI_ISL_754167, EPI_ISL_754168, EPI_ISL_754170, EPI_ISL_754171, EPI_ISL_754172                                                                                                                                                                                                                                                                                                                                                                                                                                                                                                                                                 |                                                                                             |                                                                                                                            |                                                                                                                                                                                                                                                                                                                                                                                                                                                                                                                                                                                             |
| see above                                                                                                                                                                                                                                                                                                                                                                                                                                                                                                                                                                                                                                                                                                                                                                                                                                      | Laboratoire de Microbiologie                                                                | National Reference Center for Viruses of Respiratory Infections, Institut Pasteur, Paris                                   | Marion Barbet, Sylvie Behillil, Méline Bizard, Angela Brisebarre, Camille Capel, Etienne Simon-Lorière, Vincent Enouf, Maud Vanpeene, Sylvie van der Werf, Marie-Sarah Fangous                                                                                                                                                                                                                                                                                                                                                                                                              |
| EPI_ISL_754175                                                                                                                                                                                                                                                                                                                                                                                                                                                                                                                                                                                                                                                                                                                                                                                                                                 | Charité Universitätsmedizin Berlin, Institut für Virologie                                  | Charité Universitätsmedizin Berlin, Institut für Virologie                                                                 | Victor M Corman, Julia Schneider, Jörn Beheim-Schwarzbach, Barbara Mühlemann, Talitha Veith, Terry Jones, Christian Drosten                                                                                                                                                                                                                                                                                                                                                                                                                                                                 |
| EPI_ISL_754249, EPI_ISL_754251, EPI_ISL_754252, EPI_ISL_754258, EPI_ISL_754260, EPI_ISL_754262, EPI_ISL_754267, EPI_ISL_754268, EPI_ISL_754269, EPI_ISL_754271, EPI_ISL_754273, EPI_ISL_754275, EPI_ISL_754277, EPI_ISL_754281, EPI_ISL_754282, EPI_ISL_754283, EPI_ISL_754284, EPI_ISL_754285, EPI_ISL_754291, EPI_ISL_754293, EPI_ISL_754310, EPI_ISL_754311, EPI_ISL_754324, EPI_ISL_754341, EPI_ISL_754350, EPI_ISL_754351, EPI_ISL_754355, EPI_ISL_754359, EPI_ISL_754363, EPI_ISL_754366, EPI_ISL_754370, EPI_ISL_754371, EPI_ISL_754372, EPI_ISL_754373, EPI_ISL_754374, EPI_ISL_754381, EPI_ISL_754387                                                                                                                                                                                                                                 |                                                                                             |                                                                                                                            |                                                                                                                                                                                                                                                                                                                                                                                                                                                                                                                                                                                             |
| see above                                                                                                                                                                                                                                                                                                                                                                                                                                                                                                                                                                                                                                                                                                                                                                                                                                      | Respiratory Virus Unit, National Infection Service, Public Health England                   | COVID-19 Genomics UK (COG-UK) Consortium                                                                                   | PHE Covid Sequencing Team                                                                                                                                                                                                                                                                                                                                                                                                                                                                                                                                                                   |
| EPI_ISL_754412, EPI_ISL_754414, EPI_ISL_754415, EPI_ISL_754419, EPI_ISL_754420, EPI_ISL_754423, EPI_ISL_754424, EPI_ISL_754426, EPI_ISL_754436, EPI_ISL_754438, EPI_ISL_754441, EPI_ISL_754448, EPI_ISL_754450, EPI_ISL_754458, EPI_ISL_754461, EPI_ISL_754462, EPI_ISL_754464, EPI_ISL_754465, EPI_ISL_754466, EPI_ISL_754469, EPI_ISL_754470, EPI_ISL_754471, EPI_ISL_754474, EPI_ISL_754476, EPI_ISL_754551, EPI_ISL_754554, EPI_ISL_754555, EPI_ISL_754557, EPI_ISL_754558, EPI_ISL_754559, EPI_ISL_754561, EPI_ISL_754563, EPI_ISL_754565, EPI_ISL_754570, EPI_ISL_754571, EPI_ISL_754573                                                                                                                                                                                                                                                 |                                                                                             |                                                                                                                            |                                                                                                                                                                                                                                                                                                                                                                                                                                                                                                                                                                                             |
| see above                                                                                                                                                                                                                                                                                                                                                                                                                                                                                                                                                                                                                                                                                                                                                                                                                                      | Wadsworth Center, New York State Department of Health                                       | Wadsworth Center, New York State Department of Health                                                                      | Kirsten St. George, Daryl M. Lamson, Alexis Russel, Matthew Shudt, Melissa A Leisner, Jonathan Plitnick, Navjot Singh, John Kelly, Sara Griesemer, Erasmus Schneider, Erica Lasek-Nesselquist                                                                                                                                                                                                                                                                                                                                                                                               |
| EPI_ISL_754623, EPI_ISL_754629, EPI_ISL_754630, EPI_ISL_754632, EPI_ISL_754634, EPI_ISL_754638, EPI_ISL_754639, EPI_ISL_754640, EPI_ISL_754642, EPI_ISL_754644, EPI_ISL_754645, EPI_ISL_754650, EPI_ISL_754651, EPI_ISL_754655, EPI_ISL_754656, EPI_ISL_754658, EPI_ISL_754661, EPI_ISL_754662, EPI_ISL_754663, EPI_ISL_754664, EPI_ISL_754666, EPI_ISL_754670, EPI_ISL_754671, EPI_ISL_754674, EPI_ISL_754675                                                                                                                                                                                                                                                                                                                                                                                                                                 |                                                                                             |                                                                                                                            |                                                                                                                                                                                                                                                                                                                                                                                                                                                                                                                                                                                             |
| see above                                                                                                                                                                                                                                                                                                                                                                                                                                                                                                                                                                                                                                                                                                                                                                                                                                      | University of Wisconsin-Madison AIDS Vaccine Research Laboratories                          | University of Wisconsin-Madison AIDS Vaccine Research Laboratories                                                         | Gage Moreno, Katarina Braun, et al. AIDS Vaccine Research Laboratories                                                                                                                                                                                                                                                                                                                                                                                                                                                                                                                      |
| EPI_ISL_754775                                                                                                                                                                                                                                                                                                                                                                                                                                                                                                                                                                                                                                                                                                                                                                                                                                 | Emory Molecular Diagnostics Laboratory, Emory Healthcare                                    | Piantadosi Lab, Emory Department of Pathology                                                                              | Ahmed Babiker, Anne Piantadosi                                                                                                                                                                                                                                                                                                                                                                                                                                                                                                                                                              |
| EPI_ISL_754847                                                                                                                                                                                                                                                                                                                                                                                                                                                                                                                                                                                                                                                                                                                                                                                                                                 | Korian Villa d'Azon                                                                         | National Reference Center for Viruses of Respiratory Infections, Institut Pasteur, Paris                                   | Marion Barbet, Sylvie Behillil, Méline Bizard, Angela Brisebarre, Camille Capel, Etienne Simon-Lorière, Vincent Enouf, Maud Vanpeene, Sylvie van der Werf                                                                                                                                                                                                                                                                                                                                                                                                                                   |
| EPI_ISL_754849, EPI_ISL_754851, EPI_ISL_754852                                                                                                                                                                                                                                                                                                                                                                                                                                                                                                                                                                                                                                                                                                                                                                                                 | Laboratoire de Virologie Hôpital Robert Debré                                               | National Reference Center for Viruses of Respiratory Infections, Institut Pasteur, Paris                                   | Marion Barbet, Sylvie Behillil, Méline Bizard, Angela Brisebarre, Camille Capel, Etienne Simon-Lorière, Vincent Enouf, Maud Vanpeene, Sylvie van der Werf, Andreoletti Laurent                                                                                                                                                                                                                                                                                                                                                                                                              |
| EPI_ISL_755148, EPI_ISL_755150, EPI_ISL_755153, EPI_ISL_755158, EPI_ISL_755176, EPI_ISL_755177, EPI_ISL_755186, EPI_ISL_755195                                                                                                                                                                                                                                                                                                                                                                                                                                                                                                                                                                                                                                                                                                                 | UCSD EXCITE lab                                                                             | Andersen lab at Scripps Research                                                                                           | SEARCH Alliance San Diego                                                                                                                                                                                                                                                                                                                                                                                                                                                                                                                                                                   |
| EPI_ISL_755441, EPI_ISL_755443, EPI_ISL_755490, EPI_ISL_755491, EPI_ISL_755492, EPI_ISL_755493, EPI_ISL_755494, EPI_ISL_755495, EPI_ISL_755496, EPI_ISL_755498, EPI_ISL_755500, EPI_ISL_755503, EPI_ISL_755507, EPI_ISL_755508, EPI_ISL_755511, EPI_ISL_755512, EPI_ISL_755513, EPI_ISL_755514, EPI_ISL_755519, EPI_ISL_755520, EPI_ISL_755522, EPI_ISL_755525, EPI_ISL_755526, EPI_ISL_755527, EPI_ISL_755529, EPI_ISL_755530, EPI_ISL_755531, EPI_ISL_755533, EPI_ISL_755535, EPI_ISL_755536, EPI_ISL_755537, EPI_ISL_755538, EPI_ISL_755539, EPI_ISL_755540, EPI_ISL_755541, EPI_ISL_755543, EPI_ISL_755544, EPI_ISL_755546, EPI_ISL_755547, EPI_ISL_755549, EPI_ISL_755551, EPI_ISL_755553, EPI_ISL_755556, EPI_ISL_755557, EPI_ISL_755558, EPI_ISL_755559, EPI_ISL_755560, EPI_ISL_755561, EPI_ISL_755562, EPI_ISL_755565, EPI_ISL_755567 |                                                                                             |                                                                                                                            |                                                                                                                                                                                                                                                                                                                                                                                                                                                                                                                                                                                             |
| see above                                                                                                                                                                                                                                                                                                                                                                                                                                                                                                                                                                                                                                                                                                                                                                                                                                      | Maine Health and Environmental Testing Laboratory                                           | Tewhey Lab, The Jackson Laboratory                                                                                         | Matluk,N., Dewey,H., Iosue,F., Barter,M., Lynch,R., Munger,H. and Tewhey,R.                                                                                                                                                                                                                                                                                                                                                                                                                                                                                                                 |
| EPI_ISL_755568, EPI_ISL_755570, EPI_ISL_755571                                                                                                                                                                                                                                                                                                                                                                                                                                                                                                                                                                                                                                                                                                                                                                                                 | SA Pathology                                                                                | SA Pathology                                                                                                               | Lex Leong, Julien Soubrier, Chuan Kok Lim, Song Gao, Mark Turra, Karin Kassahn, Ivan Bastian, Geoff Higgins                                                                                                                                                                                                                                                                                                                                                                                                                                                                                 |
| EPI_ISL_755572, EPI_ISL_755573, EPI_ISL_755574                                                                                                                                                                                                                                                                                                                                                                                                                                                                                                                                                                                                                                                                                                                                                                                                 | Center of Advanced Studies and Technology, CAST                                             | Center of Advanced Studies and Technology, CAST                                                                            | Ferrante,R., Mandatori,D., De Fabritiis,S.                                                                                                                                                                                                                                                                                                                                                                                                                                                                                                                                                  |
| EPI_ISL_755589                                                                                                                                                                                                                                                                                                                                                                                                                                                                                                                                                                                                                                                                                                                                                                                                                                 | Laboratoire national de santé, Microbiology, Virology                                       | Laboratoire national de santé, Microbiology, Microbial Genomics Platform                                                   | Anke Wienecke-Baldacchino, Catherine Ragimbeau,Jessica Tapp, Fatu Djabi, Lise Pignon, Raoul Salmon, Tamir Abdelrahman                                                                                                                                                                                                                                                                                                                                                                                                                                                                       |
| EPI_ISL_755600, EPI_ISL_755605                                                                                                                                                                                                                                                                                                                                                                                                                                                                                                                                                                                                                                                                                                                                                                                                                 | Helix/Illumina                                                                              | Genomics and Discovery, Respiratory Viruses Branch, Division of Viral Diseases, Centers for Disease Control and Prevention | Peter W. Cook, Dhvani Batra, Eileen de Feo, Jan Antico, Christine Tran, Matthew Tolentino, Shannon Wickline, Kim Gietzen, Brad Sickler, Jingtao Liu, Eric Allen, Phil Febbo, Summer Galloway, Nicole L. Washington, Simon White, Geraint Levan, Kelly Schiabor Barrett, Elizabeth Cirulli, Alexandre Bolze, Ary Ascencio, Charlotte Rivera-Garcia, Ryan Cho, Jason Nguyen, Sherry Wang, Jimmy Ramirez, Tyler Cassens, Efrén Sandoval, Magnus Isaksson, William Lee, David Becker, Marc Laurent, James Lu, Clinton R. Paden, Suxiang Tong, Duncan MacCannell                                 |
| EPI_ISL_755630, EPI_ISL_755632, EPI_ISL_755633                                                                                                                                                                                                                                                                                                                                                                                                                                                                                                                                                                                                                                                                                                                                                                                                 | LabPLUS                                                                                     | Institute of Environmental Science and Research (ESR)                                                                      | Xiaoyun Ren, Matt Storey, Muhammad Faisal, Jing Wang, Hermes Perez, Anja Werno, Antje van der Linden, Arlo Upton, Chris Mansell, David Hammer, Dragana Drinkovic, Gary McAuliffe, Hana Sofia Andersson, James Ussher, Jill Sherwood, Josh Freeman, Julia Howard, Juliet Elvy, Mary DeAlmeida, Matt Blakiston, Matthew Rogers, Max Bloomfield, Michael Addidle, Michelle Balm, Sally Roberts, Sarah Jefferies, Sharmini Muttaiyah, Susan Morpeth, Susan Taylor, Timothy Blackmore, Vani Sathyendran, Veronica Playle, Virginia Hope, Erasmus Smit, Lauren Jelly, Olin Silander, Joep de Ligt |
| EPI_ISL_755639                                                                                                                                                                                                                                                                                                                                                                                                                                                                                                                                                                                                                                                                                                                                                                                                                                 | Bundeswehr Institute of Microbiology                                                        | Bundeswehr Institute of Microbiology                                                                                       | Malena Bestehorn-Willmann, Mathias Walter, Christina Bugert, Joachim Bugert, Roman Wölfel, Markus Antwerpen                                                                                                                                                                                                                                                                                                                                                                                                                                                                                 |
| EPI_ISL_755641                                                                                                                                                                                                                                                                                                                                                                                                                                                                                                                                                                                                                                                                                                                                                                                                                                 | Instituto Adolfo Lutz - Regional de Santo Andre                                             | Instituto Adolfo Lutz, Interdisciplinary Procedures Center, Strategic Laboratory                                           | Claudio Tavares Sacchi, Claudia Regina Gonçalves, Erica Valessa Ramos Gomes, Karoline Rodrigues Campos                                                                                                                                                                                                                                                                                                                                                                                                                                                                                      |
| EPI_ISL_755644, EPI_ISL_755645                                                                                                                                                                                                                                                                                                                                                                                                                                                                                                                                                                                                                                                                                                                                                                                                                 | Lab LOC - Itapeperica da Serra                                                              | Instituto Adolfo Lutz, Interdisciplinary Procedures Center, Strategic Laboratory                                           | Claudio Tavares Sacchi, Claudia Regina Gonçalves, Erica Valessa Ramos Gomes, Karoline Rodrigues Campos                                                                                                                                                                                                                                                                                                                                                                                                                                                                                      |
| EPI_ISL_755648                                                                                                                                                                                                                                                                                                                                                                                                                                                                                                                                                                                                                                                                                                                                                                                                                                 | Instituto Adolfo Lutz - Regional de Taubate                                                 | Instituto Adolfo Lutz, Interdisciplinary Procedures Center, Strategic Laboratory                                           | Claudio Tavares Sacchi, Claudia Regina Gonçalves, Erica Valessa Ramos Gomes, Karoline Rodrigues Campos                                                                                                                                                                                                                                                                                                                                                                                                                                                                                      |
| EPI_ISL_755649                                                                                                                                                                                                                                                                                                                                                                                                                                                                                                                                                                                                                                                                                                                                                                                                                                 | Instituto Adolfo Lutz - Regional de Santo Andre                                             | Instituto Adolfo Lutz, Interdisciplinary Procedures Center, Strategic Laboratory                                           | Claudio Tavares Sacchi, Claudia Regina Gonçalves, Erica Valessa Ramos Gomes, Karoline Rodrigues Campos                                                                                                                                                                                                                                                                                                                                                                                                                                                                                      |
| EPI_ISL_755650                                                                                                                                                                                                                                                                                                                                                                                                                                                                                                                                                                                                                                                                                                                                                                                                                                 | Instituto Adolfo Lutz - Regional de Taubate                                                 | Instituto Adolfo Lutz, Interdisciplinary Procedures Center, Strategic Laboratory                                           | Claudio Tavares Sacchi, Claudia Regina Gonçalves, Erica Valessa Ramos Gomes, Karoline Rodrigues Campos                                                                                                                                                                                                                                                                                                                                                                                                                                                                                      |
| EPI_ISL_755651, EPI_ISL_755653, EPI_ISL_755654                                                                                                                                                                                                                                                                                                                                                                                                                                                                                                                                                                                                                                                                                                                                                                                                 | Instituto Adolfo Lutz - Central                                                             | Instituto Adolfo Lutz, Interdisciplinary Procedures Center, Strategic Laboratory                                           | Claudio Tavares Sacchi, Claudia Regina Gonçalves, Erica Valessa Ramos Gomes, Karoline Rodrigues Campos                                                                                                                                                                                                                                                                                                                                                                                                                                                                                      |
| EPI_ISL_755655                                                                                                                                                                                                                                                                                                                                                                                                                                                                                                                                                                                                                                                                                                                                                                                                                                 | Instituto Adolfo Lutz - Regional de Campinas                                                | Instituto Adolfo Lutz, Interdisciplinary Procedures Center, Strategic Laboratory                                           | Claudio Tavares Sacchi, Claudia Regina Gonçalves, Erica Valessa Ramos Gomes, Karoline Rodrigues Campos                                                                                                                                                                                                                                                                                                                                                                                                                                                                                      |
| EPI_ISL_755803, EPI_ISL_755804                                                                                                                                                                                                                                                                                                                                                                                                                                                                                                                                                                                                                                                                                                                                                                                                                 | Toronto Invasive Bacterial Diseases Network                                                 | McMaster University                                                                                                        | Allison McGeer, Patryk Aftanas, Hooman Derakhshani, Angel Li, Kuganya Nirmalarajah, Emily Panousis, Ahmed Draia, Jalees Nasir, Michael Surette, Samira Mubareka, Andrew G. McArthur                                                                                                                                                                                                                                                                                                                                                                                                         |
| EPI_ISL_756142, EPI_ISL_756147, EPI_ISL_756151                                                                                                                                                                                                                                                                                                                                                                                                                                                                                                                                                                                                                                                                                                                                                                                                 | Respiratory Virus Unit, National Infection Service, Public Health England                   | COVID-19 Genomics UK (COG-UK) Consortium                                                                                   | PHE Covid Sequencing Team                                                                                                                                                                                                                                                                                                                                                                                                                                                                                                                                                                   |

[illegible]

[illegible]

[illegible]

[illegible]

[illegible]

[illegible]







[illegible]

[illegible]

[illegible]

[illegible]

[illegible]

[illegible]





[illegible]

[illegible]

[illegible]







[illegible]



[illegible]



[illegible]

[illegible]

[illegible]

[illegible]

[illegible]





|                                                                                                                                                                                                                                                                                                                                                                                                                                                                                                                                                                                                 |                                                                                                                                                                                                 |                                          |                                                                                                                                                                                                                                                                                                                                                                                                                                                           |
|-------------------------------------------------------------------------------------------------------------------------------------------------------------------------------------------------------------------------------------------------------------------------------------------------------------------------------------------------------------------------------------------------------------------------------------------------------------------------------------------------------------------------------------------------------------------------------------------------|-------------------------------------------------------------------------------------------------------------------------------------------------------------------------------------------------|------------------------------------------|-----------------------------------------------------------------------------------------------------------------------------------------------------------------------------------------------------------------------------------------------------------------------------------------------------------------------------------------------------------------------------------------------------------------------------------------------------------|
| see above                                                                                                                                                                                                                                                                                                                                                                                                                                                                                                                                                                                       | Dutch COVID-19 response team                                                                                                                                                                    | Erasmus Medical Center                   | Bas Oude Munnink, Reina Sikkema, David Nieuwenhuijse, Irina Chestakova, Anne van der Linden, Marjan Boter, Emmanuelle Munger, Corine GeurtsvanKessel, Annemiek van der Eijk, Richard Molenkamp, Marion Koopmans, on behalf of the Dutch national COVID-19 response team.                                                                                                                                                                                  |
| EPI_ISL_763829, EPI_ISL_763835                                                                                                                                                                                                                                                                                                                                                                                                                                                                                                                                                                  | Centre for Enzyme Innovation, University of Portsmouth / Translational Research Laboratory, Portsmouth Hospitals NHS Trust                                                                      | COVID-19 Genomics UK (COG-UK) Consortium | Angela Beckett, Yann Bourgeois, Garry Scarlett, Sharon Glaysheer, Scott Elliott, Kelly Bicknell, Robert Impey, Allyson Lloyd, Sarah Wyllie, Ethan Butcher, Anoop Chauhan, Samuel Robson                                                                                                                                                                                                                                                                   |
| EPI_ISL_763841, EPI_ISL_763844, EPI_ISL_763845, EPI_ISL_763846                                                                                                                                                                                                                                                                                                                                                                                                                                                                                                                                  | Oxford Viromics, NDM, University of Oxford; Oxford University Hospitals; Basingstoke and North Hampshire Hospital                                                                               | COVID-19 Genomics UK (COG-UK) Consortium | Tanya Golubchik, David Bonsall, George Macintyre, Amy Trebes, Mariateresa de Cesare, Catrin Moore, Alex Mobbs, Anita Justice, Robert Shaw, Monique Andersson, Timothy Peto, Emma Wise, Nathan Moore, Jessica Lynch, Nick Cortes, Matilde Mori, Stephen Kidd, David Buck, John Todd, Christophe Fraser                                                                                                                                                     |
| EPI_ISL_763853                                                                                                                                                                                                                                                                                                                                                                                                                                                                                                                                                                                  | Quadram Institute Bioscience                                                                                                                                                                    | COVID-19 Genomics UK (COG-UK) Consortium | Dave J. Baker, Gemma L. Kay, Alp Aydin, Thanh Le-Viet, Steven Rudder, Ana P. Tedim, Anastasia Kolyva, Maria Diaz, Leonardo de Oliveira Martins, Nabil-Fareed Alikhan, Lizzie Meadows, Rachael Stanley, Ngozi Elumogo, Muhammed Yasir, Nicholas M. Thomson, Alexander J Trotter, Rachel Gilroy, Samuel Bloomfield, Claire Stuart, Andrew Bell, Reenesh Prakash, Samir Dervisevic, Alison E. Mather, John Wain, Mark Webber, Andrew J. Page, Justin O'Grady |
| EPI_ISL_763855, EPI_ISL_763857                                                                                                                                                                                                                                                                                                                                                                                                                                                                                                                                                                  | Queens Medical Centre, Clinical Microbiology Department / DeepSeq Nottingham                                                                                                                    | COVID-19 Genomics UK (COG-UK) Consortium | Gemma Clark, Wendy Smith, Manjinder Khakh, Vicki M Fleming, Michelle M Lister, Hannah Howson-Wells, Jonathan Ball, Patrick McClure, Joseph Chappell, Theocharis Tsoleiridis, Nadine Holmes, Matthew Carlisle, Christopher Moore, Fei Sang, Johnny Debebe, Victoria Wright, Matthew Loose                                                                                                                                                                  |
| EPI_ISL_763859, EPI_ISL_763860, EPI_ISL_763861, EPI_ISL_763862, EPI_ISL_763863                                                                                                                                                                                                                                                                                                                                                                                                                                                                                                                  | Oxford Viromics, NDM, University of Oxford; Oxford University Hospitals; Basingstoke and North Hampshire Hospital                                                                               | COVID-19 Genomics UK (COG-UK) Consortium | Tanya Golubchik, David Bonsall, George Macintyre, Amy Trebes, Mariateresa de Cesare, Catrin Moore, Alex Mobbs, Anita Justice, Robert Shaw, Monique Andersson, Timothy Peto, Emma Wise, Nathan Moore, Jessica Lynch, Nick Cortes, Matilde Mori, Stephen Kidd, David Buck, John Todd, Christophe Fraser                                                                                                                                                     |
| EPI_ISL_763875, EPI_ISL_763876, EPI_ISL_763883, EPI_ISL_763886, EPI_ISL_763887, EPI_ISL_763888, EPI_ISL_763889                                                                                                                                                                                                                                                                                                                                                                                                                                                                                  | Department of Pathology, University of Cambridge                                                                                                                                                | COVID-19 Genomics UK (COG-UK) Consortium | Aminu S. Jahun, Yasmin Chaudhry, Grant Hall, Iliana Georgana, Myra Hosmillo, Martin D. Curran, Malte Pinckert, Surendra Parmar, Ian Goodfellow                                                                                                                                                                                                                                                                                                            |
| EPI_ISL_763892, EPI_ISL_763893, EPI_ISL_763894, EPI_ISL_763895, EPI_ISL_763896, EPI_ISL_763897, EPI_ISL_763898, EPI_ISL_763899, EPI_ISL_763900, EPI_ISL_763902, EPI_ISL_763903, EPI_ISL_763904, EPI_ISL_763905, EPI_ISL_763906                                                                                                                                                                                                                                                                                                                                                                  |                                                                                                                                                                                                 |                                          |                                                                                                                                                                                                                                                                                                                                                                                                                                                           |
| see above                                                                                                                                                                                                                                                                                                                                                                                                                                                                                                                                                                                       | Virology Department, Royal Infirmary of Edinburgh, NHS Lothian / School of Biological Sciences, University of Edinburgh / Institute of Genetics and Molecular Medicine, University of Edinburgh | COVID-19 Genomics UK (COG-UK) Consortium | McHugh M, Dewar R, Rooke S, Gallagher M, Balcaza C, O'Toole Á, Scher E, Hill V, McCrone JT, Colquhoun R, Yu X, Jackson B, Rambaut A, Williams TC, Templeton K                                                                                                                                                                                                                                                                                             |
| EPI_ISL_763907                                                                                                                                                                                                                                                                                                                                                                                                                                                                                                                                                                                  | University of Exeter                                                                                                                                                                            | COVID-19 Genomics UK (COG-UK) Consortium | Ben Temperton, Aaron Jeffries, Michelle Michelsen, Joanna Warwick-Dugdale, Audrey Farbos, Robyn Manley, Stephen Michell, Jane Masoli                                                                                                                                                                                                                                                                                                                      |
| EPI_ISL_763912, EPI_ISL_763914, EPI_ISL_763918, EPI_ISL_763920, EPI_ISL_763921, EPI_ISL_763922                                                                                                                                                                                                                                                                                                                                                                                                                                                                                                  | Quadram Institute Bioscience                                                                                                                                                                    | COVID-19 Genomics UK (COG-UK) Consortium | Dave J. Baker, Gemma L. Kay, Alp Aydin, Thanh Le-Viet, Steven Rudder, Ana P. Tedim, Anastasia Kolyva, Maria Diaz, Leonardo de Oliveira Martins, Nabil-Fareed Alikhan, Lizzie Meadows, Rachael Stanley, Ngozi Elumogo, Muhammed Yasir, Nicholas M. Thomson, Alexander J Trotter, Rachel Gilroy, Samuel Bloomfield, Claire Stuart, Andrew Bell, Reenesh Prakash, Samir Dervisevic, Alison E. Mather, John Wain, Mark Webber, Andrew J. Page, Justin O'Grady |
| EPI_ISL_763926                                                                                                                                                                                                                                                                                                                                                                                                                                                                                                                                                                                  | Queens Medical Centre, Clinical Microbiology Department / DeepSeq Nottingham                                                                                                                    | COVID-19 Genomics UK (COG-UK) Consortium | Gemma Clark, Wendy Smith, Manjinder Khakh, Vicki M Fleming, Michelle M Lister, Hannah Howson-Wells, Jonathan Ball, Patrick McClure, Joseph Chappell, Theocharis Tsoleiridis, Nadine Holmes, Matthew Carlisle, Christopher Moore, Fei Sang, Johnny Debebe, Victoria Wright, Matthew Loose                                                                                                                                                                  |
| EPI_ISL_763928, EPI_ISL_763929, EPI_ISL_763932, EPI_ISL_763933, EPI_ISL_763934, EPI_ISL_763935, EPI_ISL_763937, EPI_ISL_763938, EPI_ISL_763939, EPI_ISL_763940, EPI_ISL_763941, EPI_ISL_763943, EPI_ISL_763944, EPI_ISL_763945, EPI_ISL_763947, EPI_ISL_763948, EPI_ISL_763949, EPI_ISL_763950, EPI_ISL_763951, EPI_ISL_763952, EPI_ISL_763953, EPI_ISL_763954, EPI_ISL_763955, EPI_ISL_763956, EPI_ISL_763957, EPI_ISL_763958, EPI_ISL_763959, EPI_ISL_763960, EPI_ISL_763961, EPI_ISL_763962, EPI_ISL_763963, EPI_ISL_763964, EPI_ISL_763965, EPI_ISL_763966, EPI_ISL_763967, EPI_ISL_763968, |                                                                                                                                                                                                 |                                          |                                                                                                                                                                                                                                                                                                                                                                                                                                                           |
| see above                                                                                                                                                                                                                                                                                                                                                                                                                                                                                                                                                                                       | Oxford Viromics, NDM, University of Oxford; Oxford University Hospitals; Basingstoke and North Hampshire Hospital                                                                               | COVID-19 Genomics UK (COG-UK) Consortium | Tanya Golubchik, David Bonsall, George Macintyre, Amy Trebes, Mariateresa de Cesare, Catrin Moore, Alex Mobbs, Anita Justice, Robert Shaw, Monique Andersson, Timothy Peto, Emma Wise, Nathan Moore, Jessica Lynch, Nick Cortes, Matilde Mori, Stephen Kidd, David Buck, John Todd, Christophe Fraser                                                                                                                                                     |
| EPI_ISL_763980, EPI_ISL_763984, EPI_ISL_763985, EPI_ISL_763986, EPI_ISL_763987, EPI_ISL_763989, EPI_ISL_763990, EPI_ISL_763991, EPI_ISL_763994, EPI_ISL_763995, EPI_ISL_763996, EPI_ISL_763997, EPI_ISL_763998, EPI_ISL_763999, EPI_ISL_764000, EPI_ISL_764001, EPI_ISL_764002, EPI_ISL_764003, EPI_ISL_764004, EPI_ISL_764005                                                                                                                                                                                                                                                                  |                                                                                                                                                                                                 |                                          |                                                                                                                                                                                                                                                                                                                                                                                                                                                           |
| see above                                                                                                                                                                                                                                                                                                                                                                                                                                                                                                                                                                                       | Wales Specialist Virology Centre Sequencing lab: Pathogen Genomics Unit                                                                                                                         | COVID-19 Genomics UK (COG-UK) Consortium | Catherine Moore, Johnathan Evans, Laura Gifford, Malorie Perry, Simon Cottrell, Angela Marchbank, Alec Birchley, Alexander Adams, Amy Gaskin, Bree Gatica-Wilcox, Jason Coombes, Joel Southgate, Lauren Gilbert, Lee Graham, Nicole Pacchiarini, Sara Kumziene-Summerhayes, Sarah Taylor, Sophie Jones, Sara Rey, Matthew Bull, Joanne Watkins, Sally Corden, Tom Connor                                                                                  |
| EPI_ISL_764009, EPI_ISL_764010, EPI_ISL_764011, EPI_ISL_764012, EPI_ISL_764013, EPI_ISL_764022                                                                                                                                                                                                                                                                                                                                                                                                                                                                                                  | Centre for Enzyme Innovation, University of Portsmouth / Translational Research Laboratory, Portsmouth Hospitals NHS Trust                                                                      | COVID-19 Genomics UK (COG-UK) Consortium | Angela Beckett, Yann Bourgeois, Garry Scarlett, Sharon Glaysheer, Scott Elliott, Kelly Bicknell, Robert Impey, Allyson Lloyd, Sarah Wyllie, Ethan Butcher, Anoop Chauhan, Samuel Robson                                                                                                                                                                                                                                                                   |
| EPI_ISL_764033                                                                                                                                                                                                                                                                                                                                                                                                                                                                                                                                                                                  | Virology Department, Sheffield Teaching Hospitals NHS Foundation Trust/Department of Infection, Immunity and Cardiovascular Disease, The Medical School, University of Sheffield                | COVID-19 Genomics UK (COG-UK) Consortium | Thushan de Silva, Matthew Parker, Nikki Smith, Adri Agyal, Rebecca Brown, Luke Green, Rachel Tucker, Paul Parsons, Danielle Groves, Katie Johnson, Laura Carrilero, Alex Keeley, Dave Partridge, Matthew Wyles, Benjamin Lindsey, Mehmet Yavuz, Mohammad Raza, Cariad Evans                                                                                                                                                                               |
| EPI_ISL_764069, EPI_ISL_764071, EPI_ISL_764072, EPI_ISL_764073, EPI_ISL_764074                                                                                                                                                                                                                                                                                                                                                                                                                                                                                                                  | Virology Department, Royal Infirmary of Edinburgh, NHS Lothian / School of Biological Sciences, University of Edinburgh / Institute of Genetics and Molecular Medicine, University of Edinburgh | COVID-19 Genomics UK (COG-UK) Consortium | McHugh M, Dewar R, Rooke S, Gallagher M, Balcaza C, O'Toole Á, Scher E, Hill V, McCrone JT, Colquhoun R, Yu X, Jackson B, Rambaut A, Williams TC, Templeton K                                                                                                                                                                                                                                                                                             |
| EPI_ISL_764077, EPI_ISL_764078, EPI_ISL_764079                                                                                                                                                                                                                                                                                                                                                                                                                                                                                                                                                  | Oxford Viromics, NDM, University of Oxford; Oxford University Hospitals; Basingstoke and North Hampshire Hospital                                                                               | COVID-19 Genomics UK (COG-UK) Consortium | Tanya Golubchik, David Bonsall, George Macintyre, Amy Trebes, Mariateresa de Cesare, Catrin Moore, Alex Mobbs, Anita Justice, Robert Shaw, Monique Andersson, Timothy Peto, Emma Wise, Nathan Moore, Jessica Lynch, Nick Cortes, Matilde Mori, Stephen Kidd, David Buck, John Todd, Christophe Fraser                                                                                                                                                     |
| EPI_ISL_764083                                                                                                                                                                                                                                                                                                                                                                                                                                                                                                                                                                                  | Virology Department, Royal Infirmary of Edinburgh, NHS Lothian / School of Biological Sciences, University of Edinburgh / Institute of Genetics and Molecular Medicine, University of Edinburgh | COVID-19 Genomics UK (COG-UK) Consortium | McHugh M, Dewar R, Rooke S, Gallagher M, Balcaza C, O'Toole Á, Scher E, Hill V, McCrone JT, Colquhoun R, Yu X, Jackson B, Rambaut A, Williams TC, Templeton K                                                                                                                                                                                                                                                                                             |
| EPI_ISL_764085, EPI_ISL_764087, EPI_ISL_764088, EPI_ISL_764089, EPI_ISL_764090, EPI_ISL_764092, EPI_ISL_764093                                                                                                                                                                                                                                                                                                                                                                                                                                                                                  | Oxford Viromics, NDM, University of Oxford; Oxford University Hospitals; Basingstoke and North Hampshire Hospital                                                                               | COVID-19 Genomics UK (COG-UK) Consortium | Tanya Golubchik, David Bonsall, George Macintyre, Amy Trebes, Mariateresa de Cesare, Catrin Moore, Alex Mobbs, Anita Justice, Robert Shaw, Monique Andersson, Timothy Peto, Emma Wise, Nathan Moore, Jessica Lynch, Nick Cortes, Matilde Mori, Stephen Kidd, David Buck, John Todd, Christophe Fraser                                                                                                                                                     |
| EPI_ISL_764105                                                                                                                                                                                                                                                                                                                                                                                                                                                                                                                                                                                  | Virology Department, Sheffield Teaching Hospitals NHS Foundation Trust/Department of Infection, Immunity and Cardiovascular Disease, The Medical School, University of Sheffield                | COVID-19 Genomics UK (COG-UK) Consortium | Thushan de Silva, Matthew Parker, Nikki Smith, Adri Agyal, Rebecca Brown, Luke Green, Rachel Tucker, Paul Parsons, Danielle Groves, Katie Johnson, Laura Carrilero, Alex Keeley, Dave Partridge, Matthew Wyles, Benjamin Lindsey, Mehmet Yavuz, Mohammad Raza, Cariad Evans                                                                                                                                                                               |
| EPI_ISL_764113, EPI_ISL_764115                                                                                                                                                                                                                                                                                                                                                                                                                                                                                                                                                                  | Quadram Institute Bioscience                                                                                                                                                                    | COVID-19 Genomics UK (COG-UK) Consortium | Dave J. Baker, Gemma L. Kay, Alp Aydin, Thanh Le-Viet, Steven Rudder, Ana P. Tedim, Anastasia Kolyva, Maria Diaz, Leonardo de Oliveira Martins, Nabil-Fareed Alikhan, Lizzie Meadows, Rachael Stanley, Ngozi Elumogo, Muhammed Yasir, Nicholas M. Thomson, Alexander J Trotter, Rachel Gilroy, Samuel Bloomfield, Claire Stuart, Andrew Bell, Reenesh Prakash, Samir Dervisevic, Alison E. Mather, John Wain, Mark Webber, Andrew J. Page, Justin O'Grady |
| EPI_ISL_764117                                                                                                                                                                                                                                                                                                                                                                                                                                                                                                                                                                                  | Oxford Viromics, NDM, University of Oxford; Oxford University Hospitals; Basingstoke and North Hampshire Hospital                                                                               | COVID-19 Genomics UK (COG-UK) Consortium | Tanya Golubchik, David Bonsall, George Macintyre, Amy Trebes, Mariateresa de Cesare, Catrin Moore, Alex Mobbs, Anita Justice, Robert Shaw, Monique Andersson, Timothy Peto, Emma Wise, Nathan Moore, Jessica Lynch, Nick Cortes, Matilde Mori, Stephen Kidd, David Buck, John Todd, Christophe Fraser                                                                                                                                                     |
| EPI_ISL_764123                                                                                                                                                                                                                                                                                                                                                                                                                                                                                                                                                                                  | Centre for Enzyme Innovation, University of Portsmouth / Translational Research Laboratory, Portsmouth Hospitals NHS Trust                                                                      | COVID-19 Genomics UK (COG-UK) Consortium | Angela Beckett, Yann Bourgeois, Garry Scarlett, Sharon Glaysheer, Scott Elliott, Kelly Bicknell, Robert Impey, Allyson Lloyd, Sarah Wyllie, Ethan Butcher, Anoop Chauhan, Samuel Robson                                                                                                                                                                                                                                                                   |



|                                                                                                                                                                                                                                                                                                                                                                                                                                                                                                                                                                                                                                                                                                                                                                                                                                                                                                                                                                                                                                                                                                                                                                                                                                                                                                                                                                                                                                                                                |                                                                                                                |                                                                                        |                                                                                                                                                                                 |
|--------------------------------------------------------------------------------------------------------------------------------------------------------------------------------------------------------------------------------------------------------------------------------------------------------------------------------------------------------------------------------------------------------------------------------------------------------------------------------------------------------------------------------------------------------------------------------------------------------------------------------------------------------------------------------------------------------------------------------------------------------------------------------------------------------------------------------------------------------------------------------------------------------------------------------------------------------------------------------------------------------------------------------------------------------------------------------------------------------------------------------------------------------------------------------------------------------------------------------------------------------------------------------------------------------------------------------------------------------------------------------------------------------------------------------------------------------------------------------|----------------------------------------------------------------------------------------------------------------|----------------------------------------------------------------------------------------|---------------------------------------------------------------------------------------------------------------------------------------------------------------------------------|
| EPI_ISL_766006, EPI_ISL_766013                                                                                                                                                                                                                                                                                                                                                                                                                                                                                                                                                                                                                                                                                                                                                                                                                                                                                                                                                                                                                                                                                                                                                                                                                                                                                                                                                                                                                                                 |                                                                                                                |                                                                                        |                                                                                                                                                                                 |
| EPI_ISL_766016, EPI_ISL_766017, EPI_ISL_766018, EPI_ISL_766019, EPI_ISL_766020, EPI_ISL_766021, EPI_ISL_766022, EPI_ISL_766023, EPI_ISL_766024, EPI_ISL_766025, EPI_ISL_766026, EPI_ISL_766027                                                                                                                                                                                                                                                                                                                                                                                                                                                                                                                                                                                                                                                                                                                                                                                                                                                                                                                                                                                                                                                                                                                                                                                                                                                                                 |                                                                                                                |                                                                                        |                                                                                                                                                                                 |
| see above                                                                                                                                                                                                                                                                                                                                                                                                                                                                                                                                                                                                                                                                                                                                                                                                                                                                                                                                                                                                                                                                                                                                                                                                                                                                                                                                                                                                                                                                      | Department of Virology and Immunology, University of Helsinki and Helsinki University Hospital, Huslab Finland | Department of Virology, Faculty of Medicine, University of Helsinki, Helsinki, Finland | Teemu Smura, Olli Vapalahti, Maija Lappalainen, Satu Kurkela                                                                                                                    |
| EPI_ISL_766120, EPI_ISL_766125, EPI_ISL_766127, EPI_ISL_766136, EPI_ISL_766137, EPI_ISL_766143, EPI_ISL_766147, EPI_ISL_766148, EPI_ISL_766150, EPI_ISL_766154, EPI_ISL_766156, EPI_ISL_766158, EPI_ISL_766159, EPI_ISL_766160, EPI_ISL_766161, EPI_ISL_766162, EPI_ISL_766165, EPI_ISL_766169, EPI_ISL_766170, EPI_ISL_766173, EPI_ISL_766176, EPI_ISL_766181, EPI_ISL_766182, EPI_ISL_766183, EPI_ISL_766184, EPI_ISL_766185, EPI_ISL_766195, EPI_ISL_766200, EPI_ISL_766201, EPI_ISL_766204, EPI_ISL_766207, EPI_ISL_766209, EPI_ISL_766214, EPI_ISL_766216, EPI_ISL_766218, EPI_ISL_766220, EPI_ISL_766226, EPI_ISL_766229, EPI_ISL_766248, EPI_ISL_766249, EPI_ISL_766258, EPI_ISL_766298, EPI_ISL_766301, EPI_ISL_766310, EPI_ISL_766312, EPI_ISL_766317, EPI_ISL_766395, EPI_ISL_766399, EPI_ISL_766401, EPI_ISL_766411, EPI_ISL_766412, EPI_ISL_766416, EPI_ISL_766418, EPI_ISL_766422, EPI_ISL_766424, EPI_ISL_766431, EPI_ISL_766433, EPI_ISL_766434, EPI_ISL_766437, EPI_ISL_766438, EPI_ISL_766443, EPI_ISL_766444, EPI_ISL_766446, EPI_ISL_766448, EPI_ISL_766449, EPI_ISL_766450, EPI_ISL_766453, EPI_ISL_766456, EPI_ISL_766457, EPI_ISL_766461, EPI_ISL_766475, EPI_ISL_766476, EPI_ISL_766478, EPI_ISL_766479, EPI_ISL_766483, EPI_ISL_766485, EPI_ISL_766492, EPI_ISL_766495, EPI_ISL_766496, EPI_ISL_766497, EPI_ISL_766498, EPI_ISL_766502, EPI_ISL_766504, EPI_ISL_766506, EPI_ISL_766507, EPI_ISL_766515, EPI_ISL_766555, EPI_ISL_766565, EPI_ISL_766567 |                                                                                                                |                                                                                        |                                                                                                                                                                                 |
| see above                                                                                                                                                                                                                                                                                                                                                                                                                                                                                                                                                                                                                                                                                                                                                                                                                                                                                                                                                                                                                                                                                                                                                                                                                                                                                                                                                                                                                                                                      | Respiratory Virus Unit, National Infection Service, Public Health England                                      | COVID-19 Genomics UK (COG-UK) Consortium                                               | PHE Covid Sequencing Team                                                                                                                                                       |
| EPI_ISL_766569                                                                                                                                                                                                                                                                                                                                                                                                                                                                                                                                                                                                                                                                                                                                                                                                                                                                                                                                                                                                                                                                                                                                                                                                                                                                                                                                                                                                                                                                 | Oman-National Influenza Center                                                                                 | Oman-National Influenza Center                                                         | Samiha Al-Kharusi, Laila Al-Balushi, Hamida Al-Barwani, Aisha Al-Busaidi, Intisar Al-Shukri, Samira Al-Mahruqi, Hanan Al-Kindi, Amina Al-Jardani                                |
| EPI_ISL_766574, EPI_ISL_766575, EPI_ISL_766576, EPI_ISL_766577, EPI_ISL_766578, EPI_ISL_766579                                                                                                                                                                                                                                                                                                                                                                                                                                                                                                                                                                                                                                                                                                                                                                                                                                                                                                                                                                                                                                                                                                                                                                                                                                                                                                                                                                                 | ULSS 8 Berica                                                                                                  | Istituto Zooprofilattico Sperimentale delle Venezie                                    | Adelaide Milani, Alessia Schivo, Annalisa Salviato, Erika Giorgia Quaranta, Ambra Pastori, Bianca Zecchin, Alice Fusaro, Isabella Monne, Calogero Terregino, Antonia Ricci      |
| EPI_ISL_766580, EPI_ISL_766581                                                                                                                                                                                                                                                                                                                                                                                                                                                                                                                                                                                                                                                                                                                                                                                                                                                                                                                                                                                                                                                                                                                                                                                                                                                                                                                                                                                                                                                 | ULSS 2 Treviso                                                                                                 | Istituto Zooprofilattico Sperimentale delle Venezie                                    | Adelaide Milani, Alessia Schivo, Annalisa Salviato, Erika Giorgia Quaranta, Ambra Pastori, Bianca Zecchin, Alice Fusaro, Isabella Monne, Calogero Terregino, Antonia Ricci      |
| EPI_ISL_766585                                                                                                                                                                                                                                                                                                                                                                                                                                                                                                                                                                                                                                                                                                                                                                                                                                                                                                                                                                                                                                                                                                                                                                                                                                                                                                                                                                                                                                                                 | Triemli Hospital                                                                                               | Institute of Medical Virology, University of Zurich                                    | Stefan Schmutz, Maryam Zaheri, Verena Kufner, Annette Audigé, Maria Grünberg, Kevin Steiner, Jon Huder, Cyril Shah, Riccarda Capaul, Jürg Böni, Michael Huber, Alexandra Trkola |
| EPI_ISL_766586                                                                                                                                                                                                                                                                                                                                                                                                                                                                                                                                                                                                                                                                                                                                                                                                                                                                                                                                                                                                                                                                                                                                                                                                                                                                                                                                                                                                                                                                 | Limmattal Hospital                                                                                             | Institute of Medical Virology, University of Zurich                                    | Stefan Schmutz, Maryam Zaheri, Verena Kufner, Annette Audigé, Maria Grünberg, Kevin Steiner, Jon Huder, Cyril Shah, Riccarda Capaul, Jürg Böni, Michael Huber, Alexandra Trkola |
| EPI_ISL_766590                                                                                                                                                                                                                                                                                                                                                                                                                                                                                                                                                                                                                                                                                                                                                                                                                                                                                                                                                                                                                                                                                                                                                                                                                                                                                                                                                                                                                                                                 | Dr. Boubaker Karim laboratory                                                                                  | Institute of Medical Virology, University of Zurich                                    | Stefan Schmutz, Maryam Zaheri, Verena Kufner, Annette Audigé, Maria Grünberg, Kevin Steiner, Jon Huder, Cyril Shah, Riccarda Capaul, Jürg Böni, Michael Huber, Alexandra Trkola |
| EPI_ISL_766594, EPI_ISL_766595, EPI_ISL_766596, EPI_ISL_766597, EPI_ISL_766598, EPI_ISL_766599, EPI_ISL_766600, EPI_ISL_766601, EPI_ISL_766602, EPI_ISL_766603, EPI_ISL_766604, EPI_ISL_766605, EPI_ISL_766606, EPI_ISL_766607                                                                                                                                                                                                                                                                                                                                                                                                                                                                                                                                                                                                                                                                                                                                                                                                                                                                                                                                                                                                                                                                                                                                                                                                                                                 |                                                                                                                |                                                                                        |                                                                                                                                                                                 |
| see above                                                                                                                                                                                                                                                                                                                                                                                                                                                                                                                                                                                                                                                                                                                                                                                                                                                                                                                                                                                                                                                                                                                                                                                                                                                                                                                                                                                                                                                                      | The Public Health Agency of Sweden                                                                             | The Public Health Agency of Sweden                                                     | Department of Microbiology, The Public Health Agency of Sweden                                                                                                                  |
| EPI_ISL_766608, EPI_ISL_766609, EPI_ISL_766610, EPI_ISL_766622                                                                                                                                                                                                                                                                                                                                                                                                                                                                                                                                                                                                                                                                                                                                                                                                                                                                                                                                                                                                                                                                                                                                                                                                                                                                                                                                                                                                                 | Klinisk mikrobiologi                                                                                           | The Public Health Agency of Sweden                                                     | Department of Microbiology, The Public Health Agency of Sweden                                                                                                                  |
| EPI_ISL_766630, EPI_ISL_766631, EPI_ISL_766632                                                                                                                                                                                                                                                                                                                                                                                                                                                                                                                                                                                                                                                                                                                                                                                                                                                                                                                                                                                                                                                                                                                                                                                                                                                                                                                                                                                                                                 | Klinisk mikrobiologi, Viruslab                                                                                 | The Public Health Agency of Sweden                                                     | Department of Microbiology, The Public Health Agency of Sweden                                                                                                                  |
| EPI_ISL_766633, EPI_ISL_766634, EPI_ISL_766635, EPI_ISL_766636, EPI_ISL_766637, EPI_ISL_766638, EPI_ISL_766639                                                                                                                                                                                                                                                                                                                                                                                                                                                                                                                                                                                                                                                                                                                                                                                                                                                                                                                                                                                                                                                                                                                                                                                                                                                                                                                                                                 | Klinisk mikrobiologi                                                                                           | The Public Health Agency of Sweden                                                     | Department of Microbiology, The Public Health Agency of Sweden                                                                                                                  |
| EPI_ISL_766640, EPI_ISL_766641                                                                                                                                                                                                                                                                                                                                                                                                                                                                                                                                                                                                                                                                                                                                                                                                                                                                                                                                                                                                                                                                                                                                                                                                                                                                                                                                                                                                                                                 | Laboratoriemedicin, Klinisk mikrobiologi                                                                       | The Public Health Agency of Sweden                                                     | Department of Microbiology, The Public Health Agency of Sweden                                                                                                                  |
| EPI_ISL_766644                                                                                                                                                                                                                                                                                                                                                                                                                                                                                                                                                                                                                                                                                                                                                                                                                                                                                                                                                                                                                                                                                                                                                                                                                                                                                                                                                                                                                                                                 | Vardcentralen Brinken                                                                                          | The Public Health Agency of Sweden                                                     | Department of Microbiology, The Public Health Agency of Sweden                                                                                                                  |
| EPI_ISL_766692, EPI_ISL_766693                                                                                                                                                                                                                                                                                                                                                                                                                                                                                                                                                                                                                                                                                                                                                                                                                                                                                                                                                                                                                                                                                                                                                                                                                                                                                                                                                                                                                                                 | Klinisk mikrobiologi, Laboratoriemedicin                                                                       | The Public Health Agency of Sweden                                                     | Department of Microbiology, The Public Health Agency of Sweden                                                                                                                  |
| EPI_ISL_766694                                                                                                                                                                                                                                                                                                                                                                                                                                                                                                                                                                                                                                                                                                                                                                                                                                                                                                                                                                                                                                                                                                                                                                                                                                                                                                                                                                                                                                                                 | Klinisk mikrobiologi                                                                                           | The Public Health Agency of Sweden                                                     | Department of Microbiology, The Public Health Agency of Sweden                                                                                                                  |
| EPI_ISL_766695                                                                                                                                                                                                                                                                                                                                                                                                                                                                                                                                                                                                                                                                                                                                                                                                                                                                                                                                                                                                                                                                                                                                                                                                                                                                                                                                                                                                                                                                 | A05 Biomedicum                                                                                                 | The Public Health Agency of Sweden                                                     | Department of Microbiology, The Public Health Agency of Sweden                                                                                                                  |
| EPI_ISL_766696                                                                                                                                                                                                                                                                                                                                                                                                                                                                                                                                                                                                                                                                                                                                                                                                                                                                                                                                                                                                                                                                                                                                                                                                                                                                                                                                                                                                                                                                 | Klinisk Mikrobiologi                                                                                           | The Public Health Agency of Sweden                                                     | Department of Microbiology, The Public Health Agency of Sweden                                                                                                                  |
| EPI_ISL_766697                                                                                                                                                                                                                                                                                                                                                                                                                                                                                                                                                                                                                                                                                                                                                                                                                                                                                                                                                                                                                                                                                                                                                                                                                                                                                                                                                                                                                                                                 | Klinisk mikrobiologi, bakteriologi                                                                             | The Public Health Agency of Sweden                                                     | Department of Microbiology, The Public Health Agency of Sweden                                                                                                                  |
| EPI_ISL_766698, EPI_ISL_766699                                                                                                                                                                                                                                                                                                                                                                                                                                                                                                                                                                                                                                                                                                                                                                                                                                                                                                                                                                                                                                                                                                                                                                                                                                                                                                                                                                                                                                                 | A05 Biomedicum                                                                                                 | The Public Health Agency of Sweden                                                     | Department of Microbiology, The Public Health Agency of Sweden                                                                                                                  |
| EPI_ISL_766700, EPI_ISL_766701, EPI_ISL_766702, EPI_ISL_766703, EPI_ISL_766704, EPI_ISL_766705, EPI_ISL_766706                                                                                                                                                                                                                                                                                                                                                                                                                                                                                                                                                                                                                                                                                                                                                                                                                                                                                                                                                                                                                                                                                                                                                                                                                                                                                                                                                                 | The Public Health Agency of Sweden                                                                             | The Public Health Agency of Sweden                                                     | Department of Microbiology, The Public Health Agency of Sweden                                                                                                                  |
| EPI_ISL_766707                                                                                                                                                                                                                                                                                                                                                                                                                                                                                                                                                                                                                                                                                                                                                                                                                                                                                                                                                                                                                                                                                                                                                                                                                                                                                                                                                                                                                                                                 | Klinisk mikrobiologi                                                                                           | The Public Health Agency of Sweden                                                     | Department of Microbiology, The Public Health Agency of Sweden                                                                                                                  |
| EPI_ISL_766708                                                                                                                                                                                                                                                                                                                                                                                                                                                                                                                                                                                                                                                                                                                                                                                                                                                                                                                                                                                                                                                                                                                                                                                                                                                                                                                                                                                                                                                                 | A05 Biomedicum                                                                                                 | The Public Health Agency of Sweden                                                     | Department of Microbiology, The Public Health Agency of Sweden                                                                                                                  |
| EPI_ISL_766710, EPI_ISL_766711, EPI_ISL_766712                                                                                                                                                                                                                                                                                                                                                                                                                                                                                                                                                                                                                                                                                                                                                                                                                                                                                                                                                                                                                                                                                                                                                                                                                                                                                                                                                                                                                                 | Klinisk mikrobiologi                                                                                           | The Public Health Agency of Sweden                                                     | Department of Microbiology, The Public Health Agency of Sweden                                                                                                                  |
| EPI_ISL_766713                                                                                                                                                                                                                                                                                                                                                                                                                                                                                                                                                                                                                                                                                                                                                                                                                                                                                                                                                                                                                                                                                                                                                                                                                                                                                                                                                                                                                                                                 | Klinisk Mikrobiologi                                                                                           | The Public Health Agency of Sweden                                                     | Department of Microbiology, The Public Health Agency of Sweden                                                                                                                  |
| EPI_ISL_766714                                                                                                                                                                                                                                                                                                                                                                                                                                                                                                                                                                                                                                                                                                                                                                                                                                                                                                                                                                                                                                                                                                                                                                                                                                                                                                                                                                                                                                                                 | Klinisk mikrobiologi                                                                                           | The Public Health Agency of Sweden                                                     | Department of Microbiology, The Public Health Agency of Sweden                                                                                                                  |
| EPI_ISL_766715, EPI_ISL_766716, EPI_ISL_766717, EPI_ISL_766718, EPI_ISL_766719, EPI_ISL_766720, EPI_ISL_766721, EPI_ISL_766722, EPI_ISL_766723                                                                                                                                                                                                                                                                                                                                                                                                                                                                                                                                                                                                                                                                                                                                                                                                                                                                                                                                                                                                                                                                                                                                                                                                                                                                                                                                 | A05 Biomedicum                                                                                                 | The Public Health Agency of Sweden                                                     | Department of Microbiology, The Public Health Agency of Sweden                                                                                                                  |
| EPI_ISL_766724                                                                                                                                                                                                                                                                                                                                                                                                                                                                                                                                                                                                                                                                                                                                                                                                                                                                                                                                                                                                                                                                                                                                                                                                                                                                                                                                                                                                                                                                 | TATAA Biocenter                                                                                                | The Public Health Agency of Sweden                                                     | Department of Microbiology, The Public Health Agency of Sweden                                                                                                                  |
| EPI_ISL_766725, EPI_ISL_766726, EPI_ISL_766727, EPI_ISL_766728, EPI_ISL_766729, EPI_ISL_766730                                                                                                                                                                                                                                                                                                                                                                                                                                                                                                                                                                                                                                                                                                                                                                                                                                                                                                                                                                                                                                                                                                                                                                                                                                                                                                                                                                                 | Klinisk mikrobiologi                                                                                           | The Public Health Agency of Sweden                                                     | Department of Microbiology, The Public Health Agency of Sweden                                                                                                                  |
| EPI_ISL_766777, EPI_ISL_766779, EPI_ISL_766785                                                                                                                                                                                                                                                                                                                                                                                                                                                                                                                                                                                                                                                                                                                                                                                                                                                                                                                                                                                                                                                                                                                                                                                                                                                                                                                                                                                                                                 | Wyoming Public Health Laboratory                                                                               | Wyoming Public Health Laboratory                                                       | Noah Hull, Taylor Fearing, Channing Weber, Ashley Norberg, Bailey Bowcutt, and Wanda Manley                                                                                     |
| EPI_ISL_766859                                                                                                                                                                                                                                                                                                                                                                                                                                                                                                                                                                                                                                                                                                                                                                                                                                                                                                                                                                                                                                                                                                                                                                                                                                                                                                                                                                                                                                                                 | Respiratory Virus Unit, National Infection Service, Public Health England                                      | COVID-19 Genomics UK (COG-UK) Consortium                                               | PHE Covid Sequencing Team                                                                                                                                                       |
| EPI_ISL_766901                                                                                                                                                                                                                                                                                                                                                                                                                                                                                                                                                                                                                                                                                                                                                                                                                                                                                                                                                                                                                                                                                                                                                                                                                                                                                                                                                                                                                                                                 | New Mexico Department of Health Scientific Laboratory                                                          | New Mexico Department of Health Scientific Laboratory                                  | D'eldra Malone, Ellie Johnson, Anastacia Griego-Fisher                                                                                                                          |
| EPI_ISL_766997, EPI_ISL_767005, EPI_ISL_767010                                                                                                                                                                                                                                                                                                                                                                                                                                                                                                                                                                                                                                                                                                                                                                                                                                                                                                                                                                                                                                                                                                                                                                                                                                                                                                                                                                                                                                 | Delaware Public Health Laboratory                                                                              | Delaware Public Health Laboratory                                                      | Gregory Hovan                                                                                                                                                                   |
| EPI_ISL_767013                                                                                                                                                                                                                                                                                                                                                                                                                                                                                                                                                                                                                                                                                                                                                                                                                                                                                                                                                                                                                                                                                                                                                                                                                                                                                                                                                                                                                                                                 | University of Bari Biomedical Sciences and Human Oncology                                                      | University of Bari Biomedical Sciences and Human Oncology                              | Maria Chironna, Anna Sallustio, Daniela Loconsole, Marisa Accogli                                                                                                               |
| EPI_ISL_767053, EPI_ISL_767054, EPI_ISL_767055, EPI_ISL_767056, EPI_ISL_767060, EPI_ISL_767061, EPI_ISL_767064, EPI_ISL_767065, EPI_ISL_767066, EPI_ISL_767068, EPI_ISL_767069, EPI_ISL_767073, EPI_ISL_767074, EPI_ISL_767075, EPI_ISL_767076, EPI_ISL_767077, EPI_ISL_767078, EPI_ISL_767080,                                                                                                                                                                                                                                                                                                                                                                                                                                                                                                                                                                                                                                                                                                                                                                                                                                                                                                                                                                                                                                                                                                                                                                                |                                                                                                                |                                                                                        |                                                                                                                                                                                 |





[illegible]

[illegible]

[illegible]



[illegible]

[illegible]

[illegible]

|                                                                                                                                                                                                                                                                                                                                                                                                                                                                                                                                                                                                                                                                                                                                                                                                                                                                                                                                                                                                                                                                                                                                                                                                                |                                                                           |                                                                                              |                                                                                                                                                                                                                                                                                                             |
|----------------------------------------------------------------------------------------------------------------------------------------------------------------------------------------------------------------------------------------------------------------------------------------------------------------------------------------------------------------------------------------------------------------------------------------------------------------------------------------------------------------------------------------------------------------------------------------------------------------------------------------------------------------------------------------------------------------------------------------------------------------------------------------------------------------------------------------------------------------------------------------------------------------------------------------------------------------------------------------------------------------------------------------------------------------------------------------------------------------------------------------------------------------------------------------------------------------|---------------------------------------------------------------------------|----------------------------------------------------------------------------------------------|-------------------------------------------------------------------------------------------------------------------------------------------------------------------------------------------------------------------------------------------------------------------------------------------------------------|
| EPI_ISL_769794                                                                                                                                                                                                                                                                                                                                                                                                                                                                                                                                                                                                                                                                                                                                                                                                                                                                                                                                                                                                                                                                                                                                                                                                 | Lighthouse Lab in Glasgow                                                 | Wellcome Sanger Institute for the COVID-19 Genomics UK (COG-UK) Consortium                   | Harper VanSteenhouse, Yumi Kasai, David Gray, Carol Clugston, Anna Dominiczak and Alex Alderton, Roberto Amato, Sonia Goncalves, Ewan Harrison, David K. Jackson, Ian Johnston, Dominic Kwiatkowski, Cordelia Langford, John Sillitoe on behalf of the Wellcome Sanger Institute COVID-19 Surveillance Team |
| EPI_ISL_769795, EPI_ISL_769797, EPI_ISL_769798, EPI_ISL_769799, EPI_ISL_769800, EPI_ISL_769801                                                                                                                                                                                                                                                                                                                                                                                                                                                                                                                                                                                                                                                                                                                                                                                                                                                                                                                                                                                                                                                                                                                 | Lighthouse Lab in Milton Keynes                                           | Wellcome Sanger Institute for the COVID-19 Genomics UK (COG-UK) Consortium                   | The Lighthouse Lab in Milton Keynes and Alex Alderton, Roberto Amato, Sonia Goncalves, Ewan Harrison, David K. Jackson, Ian Johnston, Dominic Kwiatkowski, Cordelia Langford, John Sillitoe on behalf of the Wellcome Sanger Institute COVID-19 Surveillance Team                                           |
| EPI_ISL_769802                                                                                                                                                                                                                                                                                                                                                                                                                                                                                                                                                                                                                                                                                                                                                                                                                                                                                                                                                                                                                                                                                                                                                                                                 | Lighthouse Lab in Glasgow                                                 | Wellcome Sanger Institute for the COVID-19 Genomics UK (COG-UK) Consortium                   | Harper VanSteenhouse, Yumi Kasai, David Gray, Carol Clugston, Anna Dominiczak and Alex Alderton, Roberto Amato, Sonia Goncalves, Ewan Harrison, David K. Jackson, Ian Johnston, Dominic Kwiatkowski, Cordelia Langford, John Sillitoe on behalf of the Wellcome Sanger Institute COVID-19 Surveillance Team |
| EPI_ISL_769803, EPI_ISL_769805                                                                                                                                                                                                                                                                                                                                                                                                                                                                                                                                                                                                                                                                                                                                                                                                                                                                                                                                                                                                                                                                                                                                                                                 | Lighthouse Lab in Milton Keynes                                           | Wellcome Sanger Institute for the COVID-19 Genomics UK (COG-UK) Consortium                   | The Lighthouse Lab in Milton Keynes and Alex Alderton, Roberto Amato, Sonia Goncalves, Ewan Harrison, David K. Jackson, Ian Johnston, Dominic Kwiatkowski, Cordelia Langford, John Sillitoe on behalf of the Wellcome Sanger Institute COVID-19 Surveillance Team                                           |
| EPI_ISL_769806                                                                                                                                                                                                                                                                                                                                                                                                                                                                                                                                                                                                                                                                                                                                                                                                                                                                                                                                                                                                                                                                                                                                                                                                 | Lighthouse Lab in Glasgow                                                 | Wellcome Sanger Institute for the COVID-19 Genomics UK (COG-UK) Consortium                   | Harper VanSteenhouse, Yumi Kasai, David Gray, Carol Clugston, Anna Dominiczak and Alex Alderton, Roberto Amato, Sonia Goncalves, Ewan Harrison, David K. Jackson, Ian Johnston, Dominic Kwiatkowski, Cordelia Langford, John Sillitoe on behalf of the Wellcome Sanger Institute COVID-19 Surveillance Team |
| EPI_ISL_769807, EPI_ISL_769808, EPI_ISL_769812                                                                                                                                                                                                                                                                                                                                                                                                                                                                                                                                                                                                                                                                                                                                                                                                                                                                                                                                                                                                                                                                                                                                                                 | Lighthouse Lab in Milton Keynes                                           | Wellcome Sanger Institute for the COVID-19 Genomics UK (COG-UK) Consortium                   | The Lighthouse Lab in Milton Keynes and Alex Alderton, Roberto Amato, Sonia Goncalves, Ewan Harrison, David K. Jackson, Ian Johnston, Dominic Kwiatkowski, Cordelia Langford, John Sillitoe on behalf of the Wellcome Sanger Institute COVID-19 Surveillance Team                                           |
| EPI_ISL_769813                                                                                                                                                                                                                                                                                                                                                                                                                                                                                                                                                                                                                                                                                                                                                                                                                                                                                                                                                                                                                                                                                                                                                                                                 | Lighthouse Lab in Glasgow                                                 | Wellcome Sanger Institute for the COVID-19 Genomics UK (COG-UK) Consortium                   | Harper VanSteenhouse, Yumi Kasai, David Gray, Carol Clugston, Anna Dominiczak and Alex Alderton, Roberto Amato, Sonia Goncalves, Ewan Harrison, David K. Jackson, Ian Johnston, Dominic Kwiatkowski, Cordelia Langford, John Sillitoe on behalf of the Wellcome Sanger Institute COVID-19 Surveillance Team |
| EPI_ISL_769814, EPI_ISL_769817, EPI_ISL_769820, EPI_ISL_769822, EPI_ISL_769823, EPI_ISL_769824, EPI_ISL_769825                                                                                                                                                                                                                                                                                                                                                                                                                                                                                                                                                                                                                                                                                                                                                                                                                                                                                                                                                                                                                                                                                                 | Lighthouse Lab in Milton Keynes                                           | Wellcome Sanger Institute for the COVID-19 Genomics UK (COG-UK) Consortium                   | The Lighthouse Lab in Milton Keynes and Alex Alderton, Roberto Amato, Sonia Goncalves, Ewan Harrison, David K. Jackson, Ian Johnston, Dominic Kwiatkowski, Cordelia Langford, John Sillitoe on behalf of the Wellcome Sanger Institute COVID-19 Surveillance Team                                           |
| EPI_ISL_769826                                                                                                                                                                                                                                                                                                                                                                                                                                                                                                                                                                                                                                                                                                                                                                                                                                                                                                                                                                                                                                                                                                                                                                                                 | Lighthouse Lab in Glasgow                                                 | Wellcome Sanger Institute for the COVID-19 Genomics UK (COG-UK) Consortium                   | Harper VanSteenhouse, Yumi Kasai, David Gray, Carol Clugston, Anna Dominiczak and Alex Alderton, Roberto Amato, Sonia Goncalves, Ewan Harrison, David K. Jackson, Ian Johnston, Dominic Kwiatkowski, Cordelia Langford, John Sillitoe on behalf of the Wellcome Sanger Institute COVID-19 Surveillance Team |
| EPI_ISL_769827, EPI_ISL_769828, EPI_ISL_769829, EPI_ISL_769830, EPI_ISL_769835                                                                                                                                                                                                                                                                                                                                                                                                                                                                                                                                                                                                                                                                                                                                                                                                                                                                                                                                                                                                                                                                                                                                 | Lighthouse Lab in Milton Keynes                                           | Wellcome Sanger Institute for the COVID-19 Genomics UK (COG-UK) Consortium                   | The Lighthouse Lab in Milton Keynes and Alex Alderton, Roberto Amato, Sonia Goncalves, Ewan Harrison, David K. Jackson, Ian Johnston, Dominic Kwiatkowski, Cordelia Langford, John Sillitoe on behalf of the Wellcome Sanger Institute COVID-19 Surveillance Team                                           |
| EPI_ISL_769836                                                                                                                                                                                                                                                                                                                                                                                                                                                                                                                                                                                                                                                                                                                                                                                                                                                                                                                                                                                                                                                                                                                                                                                                 | Lighthouse Lab in Glasgow                                                 | Wellcome Sanger Institute for the COVID-19 Genomics UK (COG-UK) Consortium                   | Harper VanSteenhouse, Yumi Kasai, David Gray, Carol Clugston, Anna Dominiczak and Alex Alderton, Roberto Amato, Sonia Goncalves, Ewan Harrison, David K. Jackson, Ian Johnston, Dominic Kwiatkowski, Cordelia Langford, John Sillitoe on behalf of the Wellcome Sanger Institute COVID-19 Surveillance Team |
| EPI_ISL_769838, EPI_ISL_769841, EPI_ISL_769843, EPI_ISL_769845, EPI_ISL_769846, EPI_ISL_769847, EPI_ISL_769848, EPI_ISL_769849                                                                                                                                                                                                                                                                                                                                                                                                                                                                                                                                                                                                                                                                                                                                                                                                                                                                                                                                                                                                                                                                                 | Lighthouse Lab in Milton Keynes                                           | Wellcome Sanger Institute for the COVID-19 Genomics UK (COG-UK) Consortium                   | The Lighthouse Lab in Milton Keynes and Alex Alderton, Roberto Amato, Sonia Goncalves, Ewan Harrison, David K. Jackson, Ian Johnston, Dominic Kwiatkowski, Cordelia Langford, John Sillitoe on behalf of the Wellcome Sanger Institute COVID-19 Surveillance Team                                           |
| EPI_ISL_769850                                                                                                                                                                                                                                                                                                                                                                                                                                                                                                                                                                                                                                                                                                                                                                                                                                                                                                                                                                                                                                                                                                                                                                                                 | Lighthouse Lab in Glasgow                                                 | Wellcome Sanger Institute for the COVID-19 Genomics UK (COG-UK) Consortium                   | Harper VanSteenhouse, Yumi Kasai, David Gray, Carol Clugston, Anna Dominiczak and Alex Alderton, Roberto Amato, Sonia Goncalves, Ewan Harrison, David K. Jackson, Ian Johnston, Dominic Kwiatkowski, Cordelia Langford, John Sillitoe on behalf of the Wellcome Sanger Institute COVID-19 Surveillance Team |
| EPI_ISL_769851, EPI_ISL_769852, EPI_ISL_769853, EPI_ISL_769854, EPI_ISL_769855, EPI_ISL_769856, EPI_ISL_769857, EPI_ISL_769858, EPI_ISL_769859, EPI_ISL_769860                                                                                                                                                                                                                                                                                                                                                                                                                                                                                                                                                                                                                                                                                                                                                                                                                                                                                                                                                                                                                                                 | Lighthouse Lab in Milton Keynes                                           | Wellcome Sanger Institute for the COVID-19 Genomics UK (COG-UK) Consortium                   | The Lighthouse Lab in Milton Keynes and Alex Alderton, Roberto Amato, Sonia Goncalves, Ewan Harrison, David K. Jackson, Ian Johnston, Dominic Kwiatkowski, Cordelia Langford, John Sillitoe on behalf of the Wellcome Sanger Institute COVID-19 Surveillance Team                                           |
| EPI_ISL_769861                                                                                                                                                                                                                                                                                                                                                                                                                                                                                                                                                                                                                                                                                                                                                                                                                                                                                                                                                                                                                                                                                                                                                                                                 | Lighthouse Lab in Glasgow                                                 | Wellcome Sanger Institute for the COVID-19 Genomics UK (COG-UK) Consortium                   | Harper VanSteenhouse, Yumi Kasai, David Gray, Carol Clugston, Anna Dominiczak and Alex Alderton, Roberto Amato, Sonia Goncalves, Ewan Harrison, David K. Jackson, Ian Johnston, Dominic Kwiatkowski, Cordelia Langford, John Sillitoe on behalf of the Wellcome Sanger Institute COVID-19 Surveillance Team |
| EPI_ISL_769863                                                                                                                                                                                                                                                                                                                                                                                                                                                                                                                                                                                                                                                                                                                                                                                                                                                                                                                                                                                                                                                                                                                                                                                                 | Laboratoire Biolife                                                       | Laboratoire de Biotechnologie                                                                | Mouna Ouadghiri, Tarik Aanniz, Mohammed Walid Chemaou Elifhiri, Mohamed Chenaoui, Hanae Dakka, Afaf Alaoui, Otmane Touzani, Amina Benouda, Bouchra Belfquih, Lahcen belyamani, Saaid Amzazi and Azeddine Ibrahim                                                                                            |
| EPI_ISL_769878                                                                                                                                                                                                                                                                                                                                                                                                                                                                                                                                                                                                                                                                                                                                                                                                                                                                                                                                                                                                                                                                                                                                                                                                 | Respiratory Virus Unit, National Infection Service, Public Health England | COVID-19 Genomics UK (COG-UK) Consortium                                                     | PHE Covid Sequencing Team                                                                                                                                                                                                                                                                                   |
| EPI_ISL_769919, EPI_ISL_769920, EPI_ISL_769921, EPI_ISL_769922, EPI_ISL_769923, EPI_ISL_769924, EPI_ISL_769926, EPI_ISL_769927, EPI_ISL_769929, EPI_ISL_769930, EPI_ISL_769931, EPI_ISL_769932, EPI_ISL_769933, EPI_ISL_769934, EPI_ISL_769935, EPI_ISL_769936, EPI_ISL_769937, EPI_ISL_769939, EPI_ISL_769941, EPI_ISL_769944, EPI_ISL_769946, EPI_ISL_769947, EPI_ISL_769949, EPI_ISL_769952, EPI_ISL_769955, EPI_ISL_769956, EPI_ISL_769957, EPI_ISL_769961, EPI_ISL_769962, EPI_ISL_769963, EPI_ISL_769964, EPI_ISL_769965, EPI_ISL_769966, EPI_ISL_769967, EPI_ISL_769968, EPI_ISL_769969, EPI_ISL_769970, EPI_ISL_769971, EPI_ISL_769976, EPI_ISL_769977, EPI_ISL_769979, EPI_ISL_769983, EPI_ISL_769984                                                                                                                                                                                                                                                                                                                                                                                                                                                                                                 | Albany Medical Center Hospital Clinical Laboratories                      | Wadsworth Center, New York State Department of Health                                        | Kirsten St. George, Daryl M. Lamson, Alexis Russel, Matthew Shudt, Melissa A Leisner, Jonathan Plitnick, Navjot Singh, John Kelly, Sara Griesemer, Erasmus Schneider, Erica Lasek-Nesselquist                                                                                                               |
| EPI_ISL_770500, EPI_ISL_770501, EPI_ISL_770502, EPI_ISL_770503, EPI_ISL_770504, EPI_ISL_770505, EPI_ISL_770506, EPI_ISL_770507, EPI_ISL_770508, EPI_ISL_770509, EPI_ISL_770510, EPI_ISL_770511, EPI_ISL_770512, EPI_ISL_770513, EPI_ISL_770514, EPI_ISL_770515, EPI_ISL_770516, EPI_ISL_770517, EPI_ISL_770518, EPI_ISL_770519, EPI_ISL_770520, EPI_ISL_770521, EPI_ISL_770522, EPI_ISL_770523, EPI_ISL_770524, EPI_ISL_770525, EPI_ISL_770526, EPI_ISL_770527, EPI_ISL_770529, EPI_ISL_770530, EPI_ISL_770531, EPI_ISL_770532                                                                                                                                                                                                                                                                                                                                                                                                                                                                                                                                                                                                                                                                                 | see above                                                                 | Lithuanian University of Health Sciences Hospital, Department of Laboratory Medicine         | Lithuanian University of Health Sciences, Molecular cardiology lab.                                                                                                                                                                                                                                         |
| EPI_ISL_770692, EPI_ISL_770693, EPI_ISL_770694, EPI_ISL_770698, EPI_ISL_770701, EPI_ISL_770704, EPI_ISL_770708, EPI_ISL_770710, EPI_ISL_770711, EPI_ISL_770713, EPI_ISL_770719                                                                                                                                                                                                                                                                                                                                                                                                                                                                                                                                                                                                                                                                                                                                                                                                                                                                                                                                                                                                                                 | see above                                                                 | ZOTZ KLIMAS MVZ Düsseldorf-Centrum GbR ÜBAG für Labormedizin, Genetik, Zytologie, Pathologie | Center of Medical Microbiology, Virology, and Hospital Hygiene, University of Duesseldorf                                                                                                                                                                                                                   |
| EPI_ISL_770783, EPI_ISL_770784, EPI_ISL_770785, EPI_ISL_770786, EPI_ISL_770787, EPI_ISL_770788, EPI_ISL_770789, EPI_ISL_770791, EPI_ISL_770792, EPI_ISL_770795, EPI_ISL_770796, EPI_ISL_770798, EPI_ISL_770799                                                                                                                                                                                                                                                                                                                                                                                                                                                                                                                                                                                                                                                                                                                                                                                                                                                                                                                                                                                                 | see above                                                                 | Minnesota Department of Health, Public Health Laboratory                                     | Maximilian Damagnez, Alexander Diltthey, Ashley-Jane Duplessis, Patrick Finzer, Katrin Hoffmann, Torsten Houwaart, Lisanna Hülse, Malte Kohns Vasconcelos, Marek Korencak, Nadine Lübke, Jessica Nicolai, Klaus Pfeffer, Daniel Strelow, Jörg Timm, Andreas Walker, Tobias Wienemann, Rainer Zotz           |
| EPI_ISL_770802, EPI_ISL_770804, EPI_ISL_770806                                                                                                                                                                                                                                                                                                                                                                                                                                                                                                                                                                                                                                                                                                                                                                                                                                                                                                                                                                                                                                                                                                                                                                 | Minnesota Department of Health, Public Health Laboratory                  | Vault Health                                                                                 | Minnesota Department of Health, Public Health Laboratory                                                                                                                                                                                                                                                    |
| EPI_ISL_770816, EPI_ISL_770817                                                                                                                                                                                                                                                                                                                                                                                                                                                                                                                                                                                                                                                                                                                                                                                                                                                                                                                                                                                                                                                                                                                                                                                 | Minnesota Department of Health, Public Health Laboratory                  | Minnesota Department of Health, Public Health Laboratory                                     | Alexandra Lorentz, Jacob Garfin, Matt Plumb, and Xiong Wang                                                                                                                                                                                                                                                 |
| EPI_ISL_770818                                                                                                                                                                                                                                                                                                                                                                                                                                                                                                                                                                                                                                                                                                                                                                                                                                                                                                                                                                                                                                                                                                                                                                                                 | North Memorial                                                            | Minnesota Department of Health, Public Health Laboratory                                     | Alexandra Lorentz, Jacob Garfin, Matt Plumb, and Xiong Wang                                                                                                                                                                                                                                                 |
| EPI_ISL_770819                                                                                                                                                                                                                                                                                                                                                                                                                                                                                                                                                                                                                                                                                                                                                                                                                                                                                                                                                                                                                                                                                                                                                                                                 | Minnesota Department of Health, Public Health Laboratory                  | Minnesota Department of Health, Public Health Laboratory                                     | Alexandra Lorentz, Jacob Garfin, Matt Plumb, and Xiong Wang                                                                                                                                                                                                                                                 |
| EPI_ISL_770878, EPI_ISL_770879, EPI_ISL_770880, EPI_ISL_770881, EPI_ISL_770882, EPI_ISL_770889, EPI_ISL_770892, EPI_ISL_770895, EPI_ISL_770898, EPI_ISL_770899, EPI_ISL_770900, EPI_ISL_770901, EPI_ISL_770903, EPI_ISL_770904, EPI_ISL_770905, EPI_ISL_770907, EPI_ISL_770933, EPI_ISL_770934, EPI_ISL_770935, EPI_ISL_770937, EPI_ISL_770939, EPI_ISL_770943, EPI_ISL_770944, EPI_ISL_770945, EPI_ISL_770946, EPI_ISL_770948, EPI_ISL_770949, EPI_ISL_770951, EPI_ISL_770952, EPI_ISL_770953, EPI_ISL_770955, EPI_ISL_770956, EPI_ISL_770957, EPI_ISL_770958, EPI_ISL_770959, EPI_ISL_770960, EPI_ISL_770961, EPI_ISL_770962, EPI_ISL_770963, EPI_ISL_770964, EPI_ISL_770965, EPI_ISL_770966, EPI_ISL_770967, EPI_ISL_770968, EPI_ISL_770969, EPI_ISL_770970, EPI_ISL_770971, EPI_ISL_770972, EPI_ISL_770973, EPI_ISL_770974, EPI_ISL_770975, EPI_ISL_770976, EPI_ISL_770977, EPI_ISL_770978, EPI_ISL_770979, EPI_ISL_770980, EPI_ISL_770981, EPI_ISL_770982, EPI_ISL_770983, EPI_ISL_770986, EPI_ISL_770987, EPI_ISL_770988, EPI_ISL_770989, EPI_ISL_770990, EPI_ISL_770991, EPI_ISL_770992, EPI_ISL_770993, EPI_ISL_770994, EPI_ISL_770995, EPI_ISL_770996, EPI_ISL_770997, EPI_ISL_770998, EPI_ISL_770999 |                                                                           |                                                                                              |                                                                                                                                                                                                                                                                                                             |

|                                                                                                                                                                                                                                                                                                                                                                                                                                                                                                                                                                                                                                                                                                                                                                                                                                                                                                                                                                                                                                                                                                                                                                                                                                                                                                                                                                                                                                                                                                                                                                                                                                                                                                                                                                                                                                                                                                                                                                                                                                                                                                                                                                                                                                                                                |           |                                                                                                             |                                                                          |                                                                                                                                                                                                                                                                                                       |
|--------------------------------------------------------------------------------------------------------------------------------------------------------------------------------------------------------------------------------------------------------------------------------------------------------------------------------------------------------------------------------------------------------------------------------------------------------------------------------------------------------------------------------------------------------------------------------------------------------------------------------------------------------------------------------------------------------------------------------------------------------------------------------------------------------------------------------------------------------------------------------------------------------------------------------------------------------------------------------------------------------------------------------------------------------------------------------------------------------------------------------------------------------------------------------------------------------------------------------------------------------------------------------------------------------------------------------------------------------------------------------------------------------------------------------------------------------------------------------------------------------------------------------------------------------------------------------------------------------------------------------------------------------------------------------------------------------------------------------------------------------------------------------------------------------------------------------------------------------------------------------------------------------------------------------------------------------------------------------------------------------------------------------------------------------------------------------------------------------------------------------------------------------------------------------------------------------------------------------------------------------------------------------|-----------|-------------------------------------------------------------------------------------------------------------|--------------------------------------------------------------------------|-------------------------------------------------------------------------------------------------------------------------------------------------------------------------------------------------------------------------------------------------------------------------------------------------------|
| EPI_ISL_771000, EPI_ISL_771001, EPI_ISL_771002, EPI_ISL_771003, EPI_ISL_771004, EPI_ISL_771005, EPI_ISL_771006, EPI_ISL_771008, EPI_ISL_771010, EPI_ISL_771011, EPI_ISL_771012, EPI_ISL_771013, EPI_ISL_771014, EPI_ISL_771015, EPI_ISL_771016, EPI_ISL_771017, EPI_ISL_771018, EPI_ISL_771019, EPI_ISL_771021, EPI_ISL_771022, EPI_ISL_771023, EPI_ISL_771024, EPI_ISL_771025, EPI_ISL_771026, EPI_ISL_771027, EPI_ISL_771028, EPI_ISL_771030, EPI_ISL_771031, EPI_ISL_771032, EPI_ISL_771033, EPI_ISL_771034, EPI_ISL_771035, EPI_ISL_771036, EPI_ISL_771037, EPI_ISL_771038, EPI_ISL_771039, EPI_ISL_771040, EPI_ISL_771041, EPI_ISL_771042, EPI_ISL_771043, EPI_ISL_771044, EPI_ISL_771045, EPI_ISL_771046, EPI_ISL_771047, EPI_ISL_771048, EPI_ISL_771050, EPI_ISL_771051, EPI_ISL_771052, EPI_ISL_771055, EPI_ISL_771057, EPI_ISL_771058, EPI_ISL_771059, EPI_ISL_771060, EPI_ISL_771061, EPI_ISL_771062, EPI_ISL_771063, EPI_ISL_771064, EPI_ISL_771065, EPI_ISL_771066, EPI_ISL_771067, EPI_ISL_771070, EPI_ISL_771071, EPI_ISL_771072, EPI_ISL_771073, EPI_ISL_771074, EPI_ISL_771075, EPI_ISL_771076, EPI_ISL_771077, EPI_ISL_771078, EPI_ISL_771080, EPI_ISL_771081, EPI_ISL_771082, EPI_ISL_771083, EPI_ISL_771084, EPI_ISL_771085, EPI_ISL_771086, EPI_ISL_771087, EPI_ISL_771088, EPI_ISL_771089, EPI_ISL_771090, EPI_ISL_771091, EPI_ISL_771093, EPI_ISL_771094, EPI_ISL_771095, EPI_ISL_771096, EPI_ISL_771097, EPI_ISL_771098, EPI_ISL_771099, EPI_ISL_771100, EPI_ISL_771102, EPI_ISL_771103, EPI_ISL_771104, EPI_ISL_771105, EPI_ISL_771106, EPI_ISL_771107, EPI_ISL_771108, EPI_ISL_771109, EPI_ISL_771110, EPI_ISL_771111, EPI_ISL_771112, EPI_ISL_771113, EPI_ISL_771114, EPI_ISL_771115, EPI_ISL_771116, EPI_ISL_771117, EPI_ISL_771118, EPI_ISL_771119, EPI_ISL_771120, EPI_ISL_771121, EPI_ISL_771122, EPI_ISL_771123, EPI_ISL_771124, EPI_ISL_771126, EPI_ISL_771127, EPI_ISL_771128, EPI_ISL_771129, EPI_ISL_771130, EPI_ISL_771131, EPI_ISL_771132, EPI_ISL_771133, EPI_ISL_771134, EPI_ISL_771135, EPI_ISL_771136, EPI_ISL_771137, EPI_ISL_771138, EPI_ISL_771139, EPI_ISL_771140, EPI_ISL_771141, EPI_ISL_771142, EPI_ISL_771143, EPI_ISL_771144, EPI_ISL_771145, EPI_ISL_771146, EPI_ISL_771147, EPI_ISL_771148, EPI_ISL_771149, EPI_ISL_771150 | see above | Laboratoire national de santé, Microbiology, Virology                                                       | Laboratoire national de santé, Microbiology, Microbial Genomics Platform | Anke Wienecke-Baldacchino, Catherine Ragimbeau, Jessica Tapp, Fatu Djabi, Lise Pignon, Raoul Salmon, Tamir Abdelrahman                                                                                                                                                                                |
| EPI_ISL_774976                                                                                                                                                                                                                                                                                                                                                                                                                                                                                                                                                                                                                                                                                                                                                                                                                                                                                                                                                                                                                                                                                                                                                                                                                                                                                                                                                                                                                                                                                                                                                                                                                                                                                                                                                                                                                                                                                                                                                                                                                                                                                                                                                                                                                                                                 |           | Gonoshasthya-RNA Molecular Diagnostic and Research Center                                                   | Gonoshasthya-RNA Molecular Diagnostic and Research Center                | Nihad Adnan, Mohd. Raed Jamiruddin, Md. Ahsanul Haq, Mohib Ullah Khondoker, Nafisa Azmuda, Firoy Ahmed, Shahana Sharmin, Salma Akter, Taslin Jahan Mou, Mahfuza Marzan, Sayeda Moriam Liza, Nowshin Jahan, Tamanna Ali, Maha Jamiruddin, Mousumi Chaity, Shahad Saif Khandker, Mumtarin Jannat Oishee |
| EPI_ISL_775019                                                                                                                                                                                                                                                                                                                                                                                                                                                                                                                                                                                                                                                                                                                                                                                                                                                                                                                                                                                                                                                                                                                                                                                                                                                                                                                                                                                                                                                                                                                                                                                                                                                                                                                                                                                                                                                                                                                                                                                                                                                                                                                                                                                                                                                                 |           | Gonoshasthya-RNA Molecular Research Center                                                                  | Gonoshasthya-RNA Molecular Research Center                               | Nihad Adnan, Mohd. Raed Jamiruddin, Md. Ahsanul Haq, Mohib Ullah Khondoker, Nafisa Azmuda, Firoy Ahmed, Shahana Sharmin, Salma Akter, Taslin Jahan Mou, Mahfuza Marzan, Sayeda Moriam Liza, Nowshin Jahan, Tamanna Ali, Maha Jamiruddin, Mousumi Chaity, Shahad Saif Khandker, Mumtarin Jannat Oishee |
| EPI_ISL_775020                                                                                                                                                                                                                                                                                                                                                                                                                                                                                                                                                                                                                                                                                                                                                                                                                                                                                                                                                                                                                                                                                                                                                                                                                                                                                                                                                                                                                                                                                                                                                                                                                                                                                                                                                                                                                                                                                                                                                                                                                                                                                                                                                                                                                                                                 |           | Gonoshasthya-RNA Molecular Research Center                                                                  | Gonoshasthya-RNA Molecular Research Center                               | Mohd. Raed Jamiruddin, Nihad Adnan, Md. Ahsanul Haq, Mohib Ullah Khondoker, Nafisa Azmuda, Firoy Ahmed, Shahana Sharmin, Salma Akter, Taslin Jahan Mou, Mahfuza Marzan, Sayeda Moriam Liza, Nowshin Jahan, Tamanna Ali, Shahad Saif Khandker, Maha Jamiruddin, Mousumi Chaity, Mumtarin Jannat Oishee |
| EPI_ISL_775213                                                                                                                                                                                                                                                                                                                                                                                                                                                                                                                                                                                                                                                                                                                                                                                                                                                                                                                                                                                                                                                                                                                                                                                                                                                                                                                                                                                                                                                                                                                                                                                                                                                                                                                                                                                                                                                                                                                                                                                                                                                                                                                                                                                                                                                                 |           | Gonoshasthya-RNA Molecular Research Center                                                                  | Gonoshasthya-RNA Molecular Research Center                               | Nihad Adnan, Mohd. Raed Jamiruddin, Md. Ahsanul Haq, Mohib Ullah Khondoker, Nafisa Azmuda, Firoy Ahmed, Shahana Sharmin, Salma Akter, Taslin Jahan Mou, Mahfuza Marzan, Sayeda Moriam Liza, Nowshin Jahan, Tamanna Ali, Maha Jamiruddin, Mousumi Chaity, Shahad Saif Khandker, Mumtarin Jannat Oishee |
| EPI_ISL_775218                                                                                                                                                                                                                                                                                                                                                                                                                                                                                                                                                                                                                                                                                                                                                                                                                                                                                                                                                                                                                                                                                                                                                                                                                                                                                                                                                                                                                                                                                                                                                                                                                                                                                                                                                                                                                                                                                                                                                                                                                                                                                                                                                                                                                                                                 |           | Gonoshasthya-RNA Molecular Research Center                                                                  | Gonoshasthya-RNA Molecular Research Center                               | Mohd. Raed Jamiruddin, Nihad Adnan, Md. Ahsanul Haq, Mohib Ullah Khondoker, Nafisa Azmuda, Firoy Ahmed, Shahana Sharmin, Salma Akter, Taslin Jahan Mou, Mahfuza Marzan, Sayeda Moriam Liza, Nowshin Jahan, Tamanna Ali, Shahad Saif Khandker, Maha Jamiruddin, Mousumi Chaity, Mumtarin Jannat Oishee |
| EPI_ISL_775220, EPI_ISL_775221, EPI_ISL_775222, EPI_ISL_775225, EPI_ISL_775256, EPI_ISL_775258, EPI_ISL_775260, EPI_ISL_775262, EPI_ISL_775263                                                                                                                                                                                                                                                                                                                                                                                                                                                                                                                                                                                                                                                                                                                                                                                                                                                                                                                                                                                                                                                                                                                                                                                                                                                                                                                                                                                                                                                                                                                                                                                                                                                                                                                                                                                                                                                                                                                                                                                                                                                                                                                                 |           | Laboratoire Biolife                                                                                         | Laboratoire de Biotechnologie                                            | Mouna Ouadghiri, Tarik Aanniz, Mohammed Walid Chemao Elifhiri, Mohamed Chenaoui, Hanae Dakka, Afaf Alaoui, Otmane Touzani, Amina Benouda, Bouchra Belfquih, Lahcen belyamani, Saaid Amzazi and Azeddine Ibrahim                                                                                       |
| EPI_ISL_775272                                                                                                                                                                                                                                                                                                                                                                                                                                                                                                                                                                                                                                                                                                                                                                                                                                                                                                                                                                                                                                                                                                                                                                                                                                                                                                                                                                                                                                                                                                                                                                                                                                                                                                                                                                                                                                                                                                                                                                                                                                                                                                                                                                                                                                                                 |           | Dept. of Medical Microbiology, Stavanger University Hospital, Helse Stavanger HF                            | Norwegian Institute of Public Health, Department of Virology             | Kathrine Stene-Johansen, Kamilla Heddeland Instefjord, Hilde Elshaug, Atiya R Ali, Marie Paulsen Madsen, Rasmus Riis Kopperud, Hilde Vollan, Karoline Bragstad, Olav Hungnes                                                                                                                          |
| EPI_ISL_775273                                                                                                                                                                                                                                                                                                                                                                                                                                                                                                                                                                                                                                                                                                                                                                                                                                                                                                                                                                                                                                                                                                                                                                                                                                                                                                                                                                                                                                                                                                                                                                                                                                                                                                                                                                                                                                                                                                                                                                                                                                                                                                                                                                                                                                                                 |           | Furst Medical Laboratory                                                                                    | Norwegian Institute of Public Health, Department of Virology             | Kathrine Stene-Johansen, Kamilla Heddeland Instefjord, Hilde Elshaug, Atiya R Ali, Marie Paulsen Madsen, Rasmus Riis Kopperud, Hilde Vollan, Karoline Bragstad, Olav Hungnes                                                                                                                          |
| EPI_ISL_775275                                                                                                                                                                                                                                                                                                                                                                                                                                                                                                                                                                                                                                                                                                                                                                                                                                                                                                                                                                                                                                                                                                                                                                                                                                                                                                                                                                                                                                                                                                                                                                                                                                                                                                                                                                                                                                                                                                                                                                                                                                                                                                                                                                                                                                                                 |           | Akershus University Hospital, Department for Microbiology and Infectious Disease Control                    | Norwegian Institute of Public Health, Department of Virology             | Kathrine Stene-Johansen, Kamilla Heddeland Instefjord, Hilde Elshaug, Atiya R Ali, Marie Paulsen Madsen, Rasmus Riis Kopperud, Hilde Vollan, Karoline Bragstad, Olav Hungnes                                                                                                                          |
| EPI_ISL_775277                                                                                                                                                                                                                                                                                                                                                                                                                                                                                                                                                                                                                                                                                                                                                                                                                                                                                                                                                                                                                                                                                                                                                                                                                                                                                                                                                                                                                                                                                                                                                                                                                                                                                                                                                                                                                                                                                                                                                                                                                                                                                                                                                                                                                                                                 |           | Nordland Hospital - Bodo, Laboratory Department, Molecular Biology Unit                                     | Norwegian Institute of Public Health, Department of Virology             | Kathrine Stene-Johansen, Kamilla Heddeland Instefjord, Hilde Elshaug, Atiya R Ali, Marie Paulsen Madsen, Rasmus Riis Kopperud, Hilde Vollan, Karoline Bragstad, Olav Hungnes                                                                                                                          |
| EPI_ISL_775278                                                                                                                                                                                                                                                                                                                                                                                                                                                                                                                                                                                                                                                                                                                                                                                                                                                                                                                                                                                                                                                                                                                                                                                                                                                                                                                                                                                                                                                                                                                                                                                                                                                                                                                                                                                                                                                                                                                                                                                                                                                                                                                                                                                                                                                                 |           | Oslo University Hospital, Department of Medical Microbiology                                                | Norwegian Institute of Public Health, Department of Virology             | Kathrine Stene-Johansen, Kamilla Heddeland Instefjord, Hilde Elshaug, Atiya R Ali, Marie Paulsen Madsen, Rasmus Riis Kopperud, Hilde Vollan, Karoline Bragstad, Olav Hungnes                                                                                                                          |
| EPI_ISL_775291, EPI_ISL_775292                                                                                                                                                                                                                                                                                                                                                                                                                                                                                                                                                                                                                                                                                                                                                                                                                                                                                                                                                                                                                                                                                                                                                                                                                                                                                                                                                                                                                                                                                                                                                                                                                                                                                                                                                                                                                                                                                                                                                                                                                                                                                                                                                                                                                                                 |           | Nordland Hospital - Bodo, Laboratory Department, Molecular Biology Unit                                     | Norwegian Institute of Public Health, Department of Virology             | Kathrine Stene-Johansen, Kamilla Heddeland Instefjord, Hilde Elshaug, Atiya R Ali, Marie Paulsen Madsen, Rasmus Riis Kopperud, Hilde Vollan, Karoline Bragstad, Olav Hungnes                                                                                                                          |
| EPI_ISL_775293                                                                                                                                                                                                                                                                                                                                                                                                                                                                                                                                                                                                                                                                                                                                                                                                                                                                                                                                                                                                                                                                                                                                                                                                                                                                                                                                                                                                                                                                                                                                                                                                                                                                                                                                                                                                                                                                                                                                                                                                                                                                                                                                                                                                                                                                 |           | Oslo University Hospital, Department of Medical Microbiology                                                | Norwegian Institute of Public Health, Department of Virology             | Kathrine Stene-Johansen, Kamilla Heddeland Instefjord, Hilde Elshaug, Atiya R Ali, Marie Paulsen Madsen, Rasmus Riis Kopperud, Hilde Vollan, Karoline Bragstad, Olav Hungnes                                                                                                                          |
| EPI_ISL_775305                                                                                                                                                                                                                                                                                                                                                                                                                                                                                                                                                                                                                                                                                                                                                                                                                                                                                                                                                                                                                                                                                                                                                                                                                                                                                                                                                                                                                                                                                                                                                                                                                                                                                                                                                                                                                                                                                                                                                                                                                                                                                                                                                                                                                                                                 |           | Unilabs Laboratory Medicine                                                                                 | Norwegian Institute of Public Health, Department of Virology             | Kathrine Stene-Johansen, Kamilla Heddeland Instefjord, Hilde Elshaug, Atiya R Ali, Marie Paulsen Madsen, Rasmus Riis Kopperud, Hilde Vollan, Karoline Bragstad, Olav Hungnes                                                                                                                          |
| EPI_ISL_775386                                                                                                                                                                                                                                                                                                                                                                                                                                                                                                                                                                                                                                                                                                                                                                                                                                                                                                                                                                                                                                                                                                                                                                                                                                                                                                                                                                                                                                                                                                                                                                                                                                                                                                                                                                                                                                                                                                                                                                                                                                                                                                                                                                                                                                                                 |           | Dept. of Medical Microbiology, Stavanger University Hospital, Helse Stavanger HF                            | Norwegian Institute of Public Health, Department of Virology             | Kathrine Stene-Johansen, Kamilla Heddeland Instefjord, Hilde Elshaug, Atiya R Ali, Marie Paulsen Madsen, Rasmus Riis Kopperud, Hilde Vollan, Karoline Bragstad, Olav Hungnes                                                                                                                          |
| EPI_ISL_775391, EPI_ISL_775392                                                                                                                                                                                                                                                                                                                                                                                                                                                                                                                                                                                                                                                                                                                                                                                                                                                                                                                                                                                                                                                                                                                                                                                                                                                                                                                                                                                                                                                                                                                                                                                                                                                                                                                                                                                                                                                                                                                                                                                                                                                                                                                                                                                                                                                 |           | Oslo University Hospital, Department of Medical Microbiology                                                | Norwegian Institute of Public Health, Department of Virology             | Kathrine Stene-Johansen, Kamilla Heddeland Instefjord, Hilde Elshaug, Atiya R Ali, Marie Paulsen Madsen, Rasmus Riis Kopperud, Hilde Vollan, Karoline Bragstad, Olav Hungnes                                                                                                                          |
| EPI_ISL_775394, EPI_ISL_775395, EPI_ISL_775396, EPI_ISL_775397                                                                                                                                                                                                                                                                                                                                                                                                                                                                                                                                                                                                                                                                                                                                                                                                                                                                                                                                                                                                                                                                                                                                                                                                                                                                                                                                                                                                                                                                                                                                                                                                                                                                                                                                                                                                                                                                                                                                                                                                                                                                                                                                                                                                                 |           | Medical Microbiology Unit, Department for Laboratory Medicine, Drammen Hospital, Vestre Viken Health Trust, | Norwegian Institute of Public Health, Department of Virology             | Kathrine Stene-Johansen, Kamilla Heddeland Instefjord, Hilde Elshaug, Atiya R Ali, Marie Paulsen Madsen, Rasmus Riis Kopperud, Hilde Vollan, Karoline Bragstad, Olav Hungnes                                                                                                                          |
| EPI_ISL_775399, EPI_ISL_775400, EPI_ISL_775401, EPI_ISL_775402, EPI_ISL_775403, EPI_ISL_775404                                                                                                                                                                                                                                                                                                                                                                                                                                                                                                                                                                                                                                                                                                                                                                                                                                                                                                                                                                                                                                                                                                                                                                                                                                                                                                                                                                                                                                                                                                                                                                                                                                                                                                                                                                                                                                                                                                                                                                                                                                                                                                                                                                                 |           | Nordland Hospital - Bodo, Laboratory Department, Molecular Biology Unit                                     | Norwegian Institute of Public Health, Department of Virology             | Kathrine Stene-Johansen, Kamilla Heddeland Instefjord, Hilde Elshaug, Atiya R Ali, Marie Paulsen Madsen, Rasmus Riis Kopperud, Hilde Vollan, Karoline Bragstad, Olav Hungnes                                                                                                                          |
| EPI_ISL_775406                                                                                                                                                                                                                                                                                                                                                                                                                                                                                                                                                                                                                                                                                                                                                                                                                                                                                                                                                                                                                                                                                                                                                                                                                                                                                                                                                                                                                                                                                                                                                                                                                                                                                                                                                                                                                                                                                                                                                                                                                                                                                                                                                                                                                                                                 |           | Unilabs Laboratory Medicine                                                                                 | Norwegian Institute of Public Health, Department of Virology             | Kathrine Stene-Johansen, Kamilla Heddeland Instefjord, Hilde Elshaug, Atiya R Ali, Marie Paulsen Madsen, Rasmus Riis Kopperud, Hilde Vollan, Karoline Bragstad, Olav Hungnes                                                                                                                          |
| EPI_ISL_775407, EPI_ISL_775408, EPI_ISL_775409                                                                                                                                                                                                                                                                                                                                                                                                                                                                                                                                                                                                                                                                                                                                                                                                                                                                                                                                                                                                                                                                                                                                                                                                                                                                                                                                                                                                                                                                                                                                                                                                                                                                                                                                                                                                                                                                                                                                                                                                                                                                                                                                                                                                                                 |           | Haukeland University Hospital, Dept. of Microbiology                                                        | Norwegian Institute of Public Health, Department of Virology             | Kathrine Stene-Johansen, Kamilla Heddeland Instefjord, Hilde Elshaug, Atiya R Ali, Marie Paulsen Madsen, Rasmus Riis Kopperud, Hilde Vollan, Karoline Bragstad, Olav Hungnes                                                                                                                          |
| EPI_ISL_775410, EPI_ISL_775411, EPI_ISL_775412, EPI_ISL_775413                                                                                                                                                                                                                                                                                                                                                                                                                                                                                                                                                                                                                                                                                                                                                                                                                                                                                                                                                                                                                                                                                                                                                                                                                                                                                                                                                                                                                                                                                                                                                                                                                                                                                                                                                                                                                                                                                                                                                                                                                                                                                                                                                                                                                 |           | Oslo University Hospital, Department of Medical Microbiology                                                | Norwegian Institute of Public Health, Department of Virology             | Kathrine Stene-Johansen, Kamilla Heddeland Instefjord, Hilde Elshaug, Atiya R Ali, Marie Paulsen Madsen, Rasmus Riis Kopperud, Hilde Vollan, Karoline Bragstad, Olav Hungnes                                                                                                                          |
| EPI_ISL_775414                                                                                                                                                                                                                                                                                                                                                                                                                                                                                                                                                                                                                                                                                                                                                                                                                                                                                                                                                                                                                                                                                                                                                                                                                                                                                                                                                                                                                                                                                                                                                                                                                                                                                                                                                                                                                                                                                                                                                                                                                                                                                                                                                                                                                                                                 |           | Norwegian Institute of Public Health, Department of Virology                                                | Norwegian Institute of Public Health, Department of Virology             | Kathrine Stene-Johansen, Kamilla Heddeland Instefjord, Hilde Elshaug, Atiya R Ali, Marie Paulsen Madsen, Rasmus Riis Kopperud, Hilde Vollan, Karoline Bragstad, Olav Hungnes                                                                                                                          |
| EPI_ISL_775416, EPI_ISL_775421, EPI_ISL_775422, EPI_ISL_775423, EPI_ISL_775424, EPI_ISL_775426                                                                                                                                                                                                                                                                                                                                                                                                                                                                                                                                                                                                                                                                                                                                                                                                                                                                                                                                                                                                                                                                                                                                                                                                                                                                                                                                                                                                                                                                                                                                                                                                                                                                                                                                                                                                                                                                                                                                                                                                                                                                                                                                                                                 |           | Oslo University Hospital, Department of Medical Microbiology                                                | Norwegian Institute of Public Health, Department of Virology             | Kathrine Stene-Johansen, Kamilla Heddeland Instefjord, Hilde Elshaug, Atiya R Ali, Marie Paulsen Madsen, Rasmus Riis Kopperud, Hilde Vollan, Karoline Bragstad, Olav Hungnes                                                                                                                          |
| EPI_ISL_775427                                                                                                                                                                                                                                                                                                                                                                                                                                                                                                                                                                                                                                                                                                                                                                                                                                                                                                                                                                                                                                                                                                                                                                                                                                                                                                                                                                                                                                                                                                                                                                                                                                                                                                                                                                                                                                                                                                                                                                                                                                                                                                                                                                                                                                                                 |           | Furst Medical Laboratory                                                                                    | Norwegian Institute of Public Health, Department of Virology             | Kathrine Stene-Johansen, Kamilla Heddeland Instefjord, Hilde Elshaug, Atiya R Ali, Marie Paulsen Madsen, Rasmus Riis Kopperud, Hilde Vollan, Karoline Bragstad, Olav Hungnes                                                                                                                          |
| EPI_ISL_775428, EPI_ISL_775429, EPI_ISL_775430, EPI_ISL_775431, EPI_ISL_775432, EPI_ISL_775433, EPI_ISL_775435, EPI_ISL_775436, EPI_ISL_775437                                                                                                                                                                                                                                                                                                                                                                                                                                                                                                                                                                                                                                                                                                                                                                                                                                                                                                                                                                                                                                                                                                                                                                                                                                                                                                                                                                                                                                                                                                                                                                                                                                                                                                                                                                                                                                                                                                                                                                                                                                                                                                                                 |           | Department of Medical Microbiology - section Molde, Molde Hospital                                          | Norwegian Institute of Public Health, Department of Virology             | Kathrine Stene-Johansen, Kamilla Heddeland Instefjord, Hilde Elshaug, Atiya R Ali, Marie Paulsen Madsen, Rasmus Riis Kopperud, Hilde Vollan, Karoline Bragstad, Olav Hungnes                                                                                                                          |
| EPI_ISL_775438, EPI_ISL_775439                                                                                                                                                                                                                                                                                                                                                                                                                                                                                                                                                                                                                                                                                                                                                                                                                                                                                                                                                                                                                                                                                                                                                                                                                                                                                                                                                                                                                                                                                                                                                                                                                                                                                                                                                                                                                                                                                                                                                                                                                                                                                                                                                                                                                                                 |           | Nordland Hospital - Bodo, Laboratory Department, Molecular                                                  | Norwegian Institute of Public Health, Department of Virology             | Kathrine Stene-Johansen, Kamilla Heddeland Instefjord, Hilde Elshaug, Atiya R Ali, Marie Paulsen Madsen, Rasmus Riis Kopperud, Hilde Vollan, Karoline                                                                                                                                                 |

|                                                                                                                                                                                                                                                                                                                                                                |                                                                                                             |                                                                                  |                                                                                                                                                                                                                                                                                                             |                                                                |
|----------------------------------------------------------------------------------------------------------------------------------------------------------------------------------------------------------------------------------------------------------------------------------------------------------------------------------------------------------------|-------------------------------------------------------------------------------------------------------------|----------------------------------------------------------------------------------|-------------------------------------------------------------------------------------------------------------------------------------------------------------------------------------------------------------------------------------------------------------------------------------------------------------|----------------------------------------------------------------|
|                                                                                                                                                                                                                                                                                                                                                                | Biology Unit                                                                                                |                                                                                  |                                                                                                                                                                                                                                                                                                             | Bragstad, Olav Hungnes                                         |
| EPI_ISL_775442                                                                                                                                                                                                                                                                                                                                                 | Medical Microbiology Unit, Department for Laboratory Medicine, Drammen Hospital, Vestre Viken Health Trust, | Norwegian Institute of Public Health, Department of Virology                     | Kathrine Stene-Johansen, Kamilla Heddeland Instefjord, Hilde Elshaug, Atiya R Ali,Marie Paulsen Madsen, Rasmus Riis Kopperud, Hilde Vollan, Karoline Bragstad, Olav Hungnes                                                                                                                                 |                                                                |
| EPI_ISL_775443                                                                                                                                                                                                                                                                                                                                                 | Norwegian Institute of Public Health, Department of Virology                                                | Norwegian Institute of Public Health, Department of Virology                     | Kathrine Stene-Johansen, Kamilla Heddeland Instefjord, Hilde Elshaug, Atiya R Ali,Marie Paulsen Madsen, Rasmus Riis Kopperud, Hilde Vollan, Karoline Bragstad, Olav Hungnes                                                                                                                                 |                                                                |
| EPI_ISL_775458                                                                                                                                                                                                                                                                                                                                                 | University Hospital of Northern Norway, Department for Microbiology and Infectious Disease Control          | Norwegian Institute of Public Health, Department of Virology                     | Kathrine Stene-Johansen, Kamilla Heddeland Instefjord, Hilde Elshaug, Atiya R Ali,Marie Paulsen Madsen, Rasmus Riis Kopperud, Hilde Vollan, Karoline Bragstad, Olav Hungnes                                                                                                                                 |                                                                |
| EPI_ISL_775463                                                                                                                                                                                                                                                                                                                                                 | Unilabs Laboratory Medicine                                                                                 | Norwegian Institute of Public Health, Department of Virology                     | Kathrine Stene-Johansen, Kamilla Heddeland Instefjord, Hilde Elshaug, Atiya R Ali,Marie Paulsen Madsen, Rasmus Riis Kopperud, Hilde Vollan, Karoline Bragstad, Olav Hungnes                                                                                                                                 |                                                                |
| EPI_ISL_775496, EPI_ISL_775497                                                                                                                                                                                                                                                                                                                                 | Furst Medical Laboratory                                                                                    | Norwegian Institute of Public Health, Department of Virology                     | Kathrine Stene-Johansen, Kamilla Heddeland Instefjord, Hilde Elshaug, Atiya R Ali,Marie Paulsen Madsen, Rasmus Riis Kopperud, Hilde Vollan, Karoline Bragstad, Olav Hungnes                                                                                                                                 |                                                                |
| EPI_ISL_775505, EPI_ISL_775506, EPI_ISL_775507, EPI_ISL_775508                                                                                                                                                                                                                                                                                                 | Department of Medical Microbiology, St. Olavs hospital                                                      | Norwegian Institute of Public Health, Department of Virology                     | Kathrine Stene-Johansen, Kamilla Heddeland Instefjord, Hilde Elshaug, Atiya R Ali,Marie Paulsen Madsen, Rasmus Riis Kopperud, Hilde Vollan, Karoline Bragstad, Olav Hungnes                                                                                                                                 |                                                                |
| EPI_ISL_775516, EPI_ISL_775517                                                                                                                                                                                                                                                                                                                                 | Unilabs Laboratory Medicine                                                                                 | Norwegian Institute of Public Health, Department of Virology                     | Kathrine Stene-Johansen, Kamilla Heddeland Instefjord, Hilde Elshaug, Atiya R Ali,Marie Paulsen Madsen, Rasmus Riis Kopperud, Hilde Vollan, Karoline Bragstad, Olav Hungnes                                                                                                                                 |                                                                |
| EPI_ISL_775518, EPI_ISL_775519, EPI_ISL_775520, EPI_ISL_775521, EPI_ISL_775522                                                                                                                                                                                                                                                                                 | Hospital of Southern Norway - Kristiansand, Department of Medical Microbiology                              | Norwegian Institute of Public Health, Department of Virology                     | Kathrine Stene-Johansen, Kamilla Heddeland Instefjord, Hilde Elshaug, Atiya R Ali,Marie Paulsen Madsen, Rasmus Riis Kopperud, Hilde Vollan, Karoline Bragstad, Olav Hungnes                                                                                                                                 |                                                                |
| EPI_ISL_775524, EPI_ISL_775525, EPI_ISL_775526, EPI_ISL_775527                                                                                                                                                                                                                                                                                                 | Furst Medical Laboratory                                                                                    | Norwegian Institute of Public Health, Department of Virology                     | Kathrine Stene-Johansen, Kamilla Heddeland Instefjord, Hilde Elshaug, Atiya R Ali,Marie Paulsen Madsen, Rasmus Riis Kopperud, Hilde Vollan, Karoline Bragstad, Olav Hungnes                                                                                                                                 |                                                                |
| EPI_ISL_775528, EPI_ISL_775529, EPI_ISL_775530                                                                                                                                                                                                                                                                                                                 | Akershus University Hospital, Department for Microbiology and Infectious Disease Control                    | Norwegian Institute of Public Health, Department of Virology                     | Kathrine Stene-Johansen, Kamilla Heddeland Instefjord, Hilde Elshaug, Atiya R Ali,Marie Paulsen Madsen, Rasmus Riis Kopperud, Hilde Vollan, Karoline Bragstad, Olav Hungnes                                                                                                                                 |                                                                |
| EPI_ISL_775531                                                                                                                                                                                                                                                                                                                                                 | Klinisk mikrobiologi, Viruslab                                                                              | The Public Health Agency of Sweden                                               |                                                                                                                                                                                                                                                                                                             | Department of Microbiology, The Public Health Agency of Sweden |
| EPI_ISL_775533, EPI_ISL_775534, EPI_ISL_775535, EPI_ISL_775536, EPI_ISL_775537, EPI_ISL_775538, EPI_ISL_775539, EPI_ISL_775540, EPI_ISL_775541                                                                                                                                                                                                                 | ABC                                                                                                         | The Public Health Agency of Sweden                                               |                                                                                                                                                                                                                                                                                                             | Department of Microbiology, The Public Health Agency of Sweden |
| EPI_ISL_775542, EPI_ISL_775543, EPI_ISL_775544, EPI_ISL_775545                                                                                                                                                                                                                                                                                                 | Klinisk mikrobiologi, Viruslab                                                                              | The Public Health Agency of Sweden                                               |                                                                                                                                                                                                                                                                                                             | Department of Microbiology, The Public Health Agency of Sweden |
| EPI_ISL_775546, EPI_ISL_775547, EPI_ISL_775548                                                                                                                                                                                                                                                                                                                 | Klinisk Mikrobiologi                                                                                        | The Public Health Agency of Sweden                                               |                                                                                                                                                                                                                                                                                                             | Department of Microbiology, The Public Health Agency of Sweden |
| EPI_ISL_775549                                                                                                                                                                                                                                                                                                                                                 | Klinisk mikrobiologi                                                                                        | The Public Health Agency of Sweden                                               |                                                                                                                                                                                                                                                                                                             | Department of Microbiology, The Public Health Agency of Sweden |
| EPI_ISL_775550, EPI_ISL_775551, EPI_ISL_775552, EPI_ISL_775553, EPI_ISL_775554, EPI_ISL_775555, EPI_ISL_775556, EPI_ISL_775557, EPI_ISL_775558, EPI_ISL_775559, EPI_ISL_775560, EPI_ISL_775561, EPI_ISL_775562, EPI_ISL_775564, EPI_ISL_775565, EPI_ISL_775566, EPI_ISL_775567, EPI_ISL_775568, EPI_ISL_775569, EPI_ISL_775570, EPI_ISL_775571                 |                                                                                                             |                                                                                  |                                                                                                                                                                                                                                                                                                             |                                                                |
| see above                                                                                                                                                                                                                                                                                                                                                      | ABC                                                                                                         | The Public Health Agency of Sweden                                               |                                                                                                                                                                                                                                                                                                             | Department of Microbiology, The Public Health Agency of Sweden |
| EPI_ISL_775572, EPI_ISL_775573, EPI_ISL_775574                                                                                                                                                                                                                                                                                                                 | Klinisk mikrobiologi                                                                                        | The Public Health Agency of Sweden                                               |                                                                                                                                                                                                                                                                                                             | Department of Microbiology, The Public Health Agency of Sweden |
| EPI_ISL_775575, EPI_ISL_775576, EPI_ISL_775577, EPI_ISL_775578, EPI_ISL_775579, EPI_ISL_775580, EPI_ISL_775581                                                                                                                                                                                                                                                 | ABC                                                                                                         | The Public Health Agency of Sweden                                               |                                                                                                                                                                                                                                                                                                             | Department of Microbiology, The Public Health Agency of Sweden |
| EPI_ISL_775583                                                                                                                                                                                                                                                                                                                                                 | Synlab Medilab, Mikrobiologi                                                                                | The Public Health Agency of Sweden                                               |                                                                                                                                                                                                                                                                                                             | Department of Microbiology, The Public Health Agency of Sweden |
| EPI_ISL_775585, EPI_ISL_775586                                                                                                                                                                                                                                                                                                                                 | Unilabs AB                                                                                                  | The Public Health Agency of Sweden                                               |                                                                                                                                                                                                                                                                                                             | Department of Microbiology, The Public Health Agency of Sweden |
| EPI_ISL_775587                                                                                                                                                                                                                                                                                                                                                 | Synlab Medilab, Mikrobiologi                                                                                | The Public Health Agency of Sweden                                               |                                                                                                                                                                                                                                                                                                             | Department of Microbiology, The Public Health Agency of Sweden |
| EPI_ISL_775588                                                                                                                                                                                                                                                                                                                                                 | Klinisk mikrobiologi                                                                                        | The Public Health Agency of Sweden                                               |                                                                                                                                                                                                                                                                                                             | Department of Microbiology, The Public Health Agency of Sweden |
| EPI_ISL_775589                                                                                                                                                                                                                                                                                                                                                 | Laboratorium for klinisk mikrobiologi                                                                       | The Public Health Agency of Sweden                                               |                                                                                                                                                                                                                                                                                                             | Department of Microbiology, The Public Health Agency of Sweden |
| EPI_ISL_775590, EPI_ISL_775591, EPI_ISL_775592                                                                                                                                                                                                                                                                                                                 | Klinisk mikrobiologi                                                                                        | The Public Health Agency of Sweden                                               |                                                                                                                                                                                                                                                                                                             | Department of Microbiology, The Public Health Agency of Sweden |
| EPI_ISL_775593                                                                                                                                                                                                                                                                                                                                                 | TATAA Biocenter                                                                                             | The Public Health Agency of Sweden                                               |                                                                                                                                                                                                                                                                                                             | Department of Microbiology, The Public Health Agency of Sweden |
| EPI_ISL_776592, EPI_ISL_776593, EPI_ISL_776594, EPI_ISL_776595, EPI_ISL_776598, EPI_ISL_776599, EPI_ISL_776600, EPI_ISL_776616, EPI_ISL_776621, EPI_ISL_776623, EPI_ISL_776624, EPI_ISL_776625, EPI_ISL_776628, EPI_ISL_776631, EPI_ISL_776632, EPI_ISL_776633, EPI_ISL_776639, EPI_ISL_776640, EPI_ISL_776642, EPI_ISL_776643, EPI_ISL_776645, EPI_ISL_776649 |                                                                                                             |                                                                                  |                                                                                                                                                                                                                                                                                                             |                                                                |
| see above                                                                                                                                                                                                                                                                                                                                                      | Israel Central Virology laboratory                                                                          | Israel Central Virology laboratory                                               | Neta Zuckerman, Efrat Dahan Bucris, Oran Erster, Michal Mandelboim, Orna Mor, Ella Mendelson                                                                                                                                                                                                                |                                                                |
| EPI_ISL_776768                                                                                                                                                                                                                                                                                                                                                 | Instituto Adolfo Lutz - Regional de Aracatuba                                                               | Instituto Adolfo Lutz, Interdisciplinary Procedures Center, Strategic Laboratory | Claudio Tavares Sacchi, Claudia Regina Gonçalves, Erica Valessa Ramos Gomes, Karoline Rodrigues Campos                                                                                                                                                                                                      |                                                                |
| EPI_ISL_776833, EPI_ISL_776837                                                                                                                                                                                                                                                                                                                                 | Israel Central Virology laboratory                                                                          | Israel Central Virology laboratory                                               | Neta Zuckerman, Efrat Dahan Bucris, Oran Erster, Michal Mandelboim, Orna Mor, Ella Mendelson                                                                                                                                                                                                                |                                                                |
| EPI_ISL_777011                                                                                                                                                                                                                                                                                                                                                 | Lighthouse Lab in Alderley Park                                                                             | Wellcome Sanger Institute for the COVID-19 Genomics UK (COG-UK) Consortium       | Jacquelyn Wynn, Mairead Hyland, The Lighthouse Lab in Alderley Park and Alex Alderton, Roberto Amato, Sonia Goncalves, Ewan Harrison, David K. Jackson, Ian Johnston, Dominic Kwiatkowski, Cordelia Langford, John Sillitoe on behalf of the Wellcome Sanger Institute COVID-19 Surveillance Team           |                                                                |
| EPI_ISL_777013                                                                                                                                                                                                                                                                                                                                                 | Lighthouse Lab in Glasgow                                                                                   | Wellcome Sanger Institute for the COVID-19 Genomics UK (COG-UK) Consortium       | Harper VanSteenhouse, Yumi Kasai, David Gray, Carol Clugston, Anna Dominiczak and Alex Alderton, Roberto Amato, Sonia Goncalves, Ewan Harrison, David K. Jackson, Ian Johnston, Dominic Kwiatkowski, Cordelia Langford, John Sillitoe on behalf of the Wellcome Sanger Institute COVID-19 Surveillance Team |                                                                |
| EPI_ISL_777014                                                                                                                                                                                                                                                                                                                                                 | Lighthouse Lab in Alderley Park                                                                             | Wellcome Sanger Institute for the COVID-19 Genomics UK (COG-UK) Consortium       | Jacquelyn Wynn, Mairead Hyland, The Lighthouse Lab in Alderley Park and Alex Alderton, Roberto Amato, Sonia Goncalves, Ewan Harrison, David K. Jackson, Ian Johnston, Dominic Kwiatkowski, Cordelia Langford, John Sillitoe on behalf of the Wellcome Sanger Institute COVID-19 Surveillance Team           |                                                                |
| EPI_ISL_777016                                                                                                                                                                                                                                                                                                                                                 | Lighthouse Lab in Glasgow                                                                                   | Wellcome Sanger Institute for the COVID-19 Genomics UK (COG-UK) Consortium       | Harper VanSteenhouse, Yumi Kasai, David Gray, Carol Clugston, Anna Dominiczak and Alex Alderton, Roberto Amato, Sonia Goncalves, Ewan Harrison, David K. Jackson, Ian Johnston, Dominic Kwiatkowski, Cordelia Langford, John Sillitoe on behalf of the Wellcome Sanger Institute COVID-19 Surveillance Team |                                                                |
| EPI_ISL_777017, EPI_ISL_777018                                                                                                                                                                                                                                                                                                                                 | Lighthouse Lab in Alderley Park                                                                             | Wellcome Sanger Institute for the COVID-19 Genomics UK (COG-UK) Consortium       | Jacquelyn Wynn, Mairead Hyland, The Lighthouse Lab in Alderley Park and Alex Alderton, Roberto Amato, Sonia Goncalves, Ewan Harrison, David K. Jackson, Ian Johnston, Dominic Kwiatkowski, Cordelia Langford, John Sillitoe on behalf of the Wellcome Sanger Institute COVID-19 Surveillance Team           |                                                                |
| EPI_ISL_777019                                                                                                                                                                                                                                                                                                                                                 | Lighthouse Lab in Glasgow                                                                                   | Wellcome Sanger Institute for the COVID-19 Genomics UK (COG-UK) Consortium       | Harper VanSteenhouse, Yumi Kasai, David Gray, Carol Clugston, Anna Dominiczak and Alex Alderton, Roberto Amato, Sonia Goncalves, Ewan Harrison, David K. Jackson, Ian Johnston, Dominic Kwiatkowski, Cordelia Langford, John Sillitoe on behalf of the Wellcome Sanger Institute COVID-19 Surveillance Team |                                                                |













|                                                |                                 |                                                                            |                                                                                                                                                                                                                                                                                                             |
|------------------------------------------------|---------------------------------|----------------------------------------------------------------------------|-------------------------------------------------------------------------------------------------------------------------------------------------------------------------------------------------------------------------------------------------------------------------------------------------------------|
| EPI_ISL_777389                                 | Lighthouse Lab in Alderley Park | Wellcome Sanger Institute for the COVID-19 Genomics UK (COG-UK) Consortium | Jacquelyn Wynn, Mairead Hyland, The Lighthouse Lab in Alderley Park and Alex Alderton, Roberto Amato, Sonia Goncalves, Ewan Harrison, David K. Jackson, Ian Johnston, Dominic Kwiatkowski, Cordelia Langford, John Sillitoe on behalf of the Wellcome Sanger Institute COVID-19 Surveillance Team           |
| EPI_ISL_777390, EPI_ISL_777391                 | Lighthouse Lab in Cambridge     | Wellcome Sanger Institute for the COVID-19 Genomics UK (COG-UK) Consortium | Rob Howes, The Lighthouse Lab in Cambridge and Alex Alderton, Roberto Amato, Sonia Goncalves, Ewan Harrison, David K. Jackson, Ian Johnston, Dominic Kwiatkowski, Cordelia Langford, John Sillitoe on behalf of the Wellcome Sanger Institute COVID-19 Surveillance Team                                    |
| EPI_ISL_777392, EPI_ISL_777393, EPI_ISL_777395 | Lighthouse Lab in Glasgow       | Wellcome Sanger Institute for the COVID-19 Genomics UK (COG-UK) Consortium | Harper VanSteenhouse, Yumi Kasai, David Gray, Carol Clugston, Anna Dominiczak and Alex Alderton, Roberto Amato, Sonia Goncalves, Ewan Harrison, David K. Jackson, Ian Johnston, Dominic Kwiatkowski, Cordelia Langford, John Sillitoe on behalf of the Wellcome Sanger Institute COVID-19 Surveillance Team |
| EPI_ISL_777396                                 | Lighthouse Lab in Cambridge     | Wellcome Sanger Institute for the COVID-19 Genomics UK (COG-UK) Consortium | Rob Howes, The Lighthouse Lab in Cambridge and Alex Alderton, Roberto Amato, Sonia Goncalves, Ewan Harrison, David K. Jackson, Ian Johnston, Dominic Kwiatkowski, Cordelia Langford, John Sillitoe on behalf of the Wellcome Sanger Institute COVID-19 Surveillance Team                                    |

We gratefully acknowledge the following Authors from the Originating laboratories responsible for obtaining the specimens, as well as the Submitting laboratories where the genome data were generated and shared via GISAID, on which this research is based.

All Submitters of data may be contacted directly via [www.gisaid.org](http://www.gisaid.org)

Authors are sorted alphabetically.









[illegible]

[illegible]

[illegible]



[illegible]

[illegible]

[illegible]

[illegible]



[illegible]

[illegible]



[illegible]

[illegible]

[illegible]

[illegible]

[illegible]



[illegible]

[illegible]

[illegible]

[illegible]

[illegible]

[illegible]

[illegible]

[illegible]



[illegible]

|                                                                                                                                                                                                                                                                                                                                                                                                                                                                              |                                                                    |                                                                            |                                                                                                                                                                                                                                                                                                   |
|------------------------------------------------------------------------------------------------------------------------------------------------------------------------------------------------------------------------------------------------------------------------------------------------------------------------------------------------------------------------------------------------------------------------------------------------------------------------------|--------------------------------------------------------------------|----------------------------------------------------------------------------|---------------------------------------------------------------------------------------------------------------------------------------------------------------------------------------------------------------------------------------------------------------------------------------------------|
| EPI_ISL_783031                                                                                                                                                                                                                                                                                                                                                                                                                                                               | Lighthouse Lab in Cambridge                                        | Wellcome Sanger Institute for the COVID-19 Genomics UK (COG-UK) Consortium | Rob Howes, The Lighthouse Lab in Cambridge and Alex Alderton, Roberto Amato, Sonia Goncalves, Ewan Harrison, David K. Jackson, Ian Johnston, Dominic Kwiatkowski, Cordelia Langford, John Sillitoe on behalf of the Wellcome Sanger Institute COVID-19 Surveillance Team                          |
| EPI_ISL_783035                                                                                                                                                                                                                                                                                                                                                                                                                                                               | Lighthouse Lab in Milton Keynes                                    | Wellcome Sanger Institute for the COVID-19 Genomics UK (COG-UK) Consortium | The Lighthouse Lab in Milton Keynes and Alex Alderton, Roberto Amato, Sonia Goncalves, Ewan Harrison, David K. Jackson, Ian Johnston, Dominic Kwiatkowski, Cordelia Langford, John Sillitoe on behalf of the Wellcome Sanger Institute COVID-19 Surveillance Team                                 |
| EPI_ISL_783037, EPI_ISL_783038                                                                                                                                                                                                                                                                                                                                                                                                                                               | Lighthouse Lab in Cambridge                                        | Wellcome Sanger Institute for the COVID-19 Genomics UK (COG-UK) Consortium | Rob Howes, The Lighthouse Lab in Cambridge and Alex Alderton, Roberto Amato, Sonia Goncalves, Ewan Harrison, David K. Jackson, Ian Johnston, Dominic Kwiatkowski, Cordelia Langford, John Sillitoe on behalf of the Wellcome Sanger Institute COVID-19 Surveillance Team                          |
| EPI_ISL_783040, EPI_ISL_783041                                                                                                                                                                                                                                                                                                                                                                                                                                               | Lighthouse Lab in Milton Keynes                                    | Wellcome Sanger Institute for the COVID-19 Genomics UK (COG-UK) Consortium | The Lighthouse Lab in Milton Keynes and Alex Alderton, Roberto Amato, Sonia Goncalves, Ewan Harrison, David K. Jackson, Ian Johnston, Dominic Kwiatkowski, Cordelia Langford, John Sillitoe on behalf of the Wellcome Sanger Institute COVID-19 Surveillance Team                                 |
| EPI_ISL_783045, EPI_ISL_783046                                                                                                                                                                                                                                                                                                                                                                                                                                               | Lighthouse Lab in Alderley Park                                    | Wellcome Sanger Institute for the COVID-19 Genomics UK (COG-UK) Consortium | Jacquelyn Wynn, Mairead Hyland, The Lighthouse Lab in Alderley Park and Alex Alderton, Roberto Amato, Sonia Goncalves, Ewan Harrison, David K. Jackson, Ian Johnston, Dominic Kwiatkowski, Cordelia Langford, John Sillitoe on behalf of the Wellcome Sanger Institute COVID-19 Surveillance Team |
| EPI_ISL_783048, EPI_ISL_783050                                                                                                                                                                                                                                                                                                                                                                                                                                               | Lighthouse Lab in Milton Keynes                                    | Wellcome Sanger Institute for the COVID-19 Genomics UK (COG-UK) Consortium | The Lighthouse Lab in Milton Keynes and Alex Alderton, Roberto Amato, Sonia Goncalves, Ewan Harrison, David K. Jackson, Ian Johnston, Dominic Kwiatkowski, Cordelia Langford, John Sillitoe on behalf of the Wellcome Sanger Institute COVID-19 Surveillance Team                                 |
| EPI_ISL_783052                                                                                                                                                                                                                                                                                                                                                                                                                                                               | Lighthouse Lab in Alderley Park                                    | Wellcome Sanger Institute for the COVID-19 Genomics UK (COG-UK) Consortium | Jacquelyn Wynn, Mairead Hyland, The Lighthouse Lab in Alderley Park and Alex Alderton, Roberto Amato, Sonia Goncalves, Ewan Harrison, David K. Jackson, Ian Johnston, Dominic Kwiatkowski, Cordelia Langford, John Sillitoe on behalf of the Wellcome Sanger Institute COVID-19 Surveillance Team |
| EPI_ISL_783053, EPI_ISL_783054                                                                                                                                                                                                                                                                                                                                                                                                                                               | Lighthouse Lab in Milton Keynes                                    | Wellcome Sanger Institute for the COVID-19 Genomics UK (COG-UK) Consortium | The Lighthouse Lab in Milton Keynes and Alex Alderton, Roberto Amato, Sonia Goncalves, Ewan Harrison, David K. Jackson, Ian Johnston, Dominic Kwiatkowski, Cordelia Langford, John Sillitoe on behalf of the Wellcome Sanger Institute COVID-19 Surveillance Team                                 |
| EPI_ISL_783056                                                                                                                                                                                                                                                                                                                                                                                                                                                               | Lighthouse Lab in Alderley Park                                    | Wellcome Sanger Institute for the COVID-19 Genomics UK (COG-UK) Consortium | Jacquelyn Wynn, Mairead Hyland, The Lighthouse Lab in Alderley Park and Alex Alderton, Roberto Amato, Sonia Goncalves, Ewan Harrison, David K. Jackson, Ian Johnston, Dominic Kwiatkowski, Cordelia Langford, John Sillitoe on behalf of the Wellcome Sanger Institute COVID-19 Surveillance Team |
| EPI_ISL_783057                                                                                                                                                                                                                                                                                                                                                                                                                                                               | Lighthouse Lab in Cambridge                                        | Wellcome Sanger Institute for the COVID-19 Genomics UK (COG-UK) Consortium | Rob Howes, The Lighthouse Lab in Cambridge and Alex Alderton, Roberto Amato, Sonia Goncalves, Ewan Harrison, David K. Jackson, Ian Johnston, Dominic Kwiatkowski, Cordelia Langford, John Sillitoe on behalf of the Wellcome Sanger Institute COVID-19 Surveillance Team                          |
| EPI_ISL_783062, EPI_ISL_783063, EPI_ISL_783065                                                                                                                                                                                                                                                                                                                                                                                                                               | Lighthouse Lab in Milton Keynes                                    | Wellcome Sanger Institute for the COVID-19 Genomics UK (COG-UK) Consortium | The Lighthouse Lab in Milton Keynes and Alex Alderton, Roberto Amato, Sonia Goncalves, Ewan Harrison, David K. Jackson, Ian Johnston, Dominic Kwiatkowski, Cordelia Langford, John Sillitoe on behalf of the Wellcome Sanger Institute COVID-19 Surveillance Team                                 |
| EPI_ISL_783066                                                                                                                                                                                                                                                                                                                                                                                                                                                               | Lighthouse Lab in Cambridge                                        | Wellcome Sanger Institute for the COVID-19 Genomics UK (COG-UK) Consortium | Rob Howes, The Lighthouse Lab in Cambridge and Alex Alderton, Roberto Amato, Sonia Goncalves, Ewan Harrison, David K. Jackson, Ian Johnston, Dominic Kwiatkowski, Cordelia Langford, John Sillitoe on behalf of the Wellcome Sanger Institute COVID-19 Surveillance Team                          |
| EPI_ISL_783067                                                                                                                                                                                                                                                                                                                                                                                                                                                               | Lighthouse Lab in Milton Keynes                                    | Wellcome Sanger Institute for the COVID-19 Genomics UK (COG-UK) Consortium | The Lighthouse Lab in Milton Keynes and Alex Alderton, Roberto Amato, Sonia Goncalves, Ewan Harrison, David K. Jackson, Ian Johnston, Dominic Kwiatkowski, Cordelia Langford, John Sillitoe on behalf of the Wellcome Sanger Institute COVID-19 Surveillance Team                                 |
| EPI_ISL_783068                                                                                                                                                                                                                                                                                                                                                                                                                                                               | Lighthouse Lab in Alderley Park                                    | Wellcome Sanger Institute for the COVID-19 Genomics UK (COG-UK) Consortium | Jacquelyn Wynn, Mairead Hyland, The Lighthouse Lab in Alderley Park and Alex Alderton, Roberto Amato, Sonia Goncalves, Ewan Harrison, David K. Jackson, Ian Johnston, Dominic Kwiatkowski, Cordelia Langford, John Sillitoe on behalf of the Wellcome Sanger Institute COVID-19 Surveillance Team |
| EPI_ISL_788902, EPI_ISL_788903, EPI_ISL_788939, EPI_ISL_788941                                                                                                                                                                                                                                                                                                                                                                                                               | University of Wisconsin-Madison AIDS Vaccine Research Laboratories | University of Wisconsin-Madison AIDS Vaccine Research Laboratories         | Gage Moreno, Katarina Braun, et al. AIDS Vaccine Research Laboratories                                                                                                                                                                                                                            |
| EPI_ISL_788989, EPI_ISL_788990                                                                                                                                                                                                                                                                                                                                                                                                                                               | Klinisk mikrobiologi                                               | The Public Health Agency of Sweden                                         | Department of Microbiology, The Public Health Agency of Sweden                                                                                                                                                                                                                                    |
| EPI_ISL_788991, EPI_ISL_788992, EPI_ISL_788993, EPI_ISL_788994, EPI_ISL_788995, EPI_ISL_788996, EPI_ISL_788997, EPI_ISL_788998                                                                                                                                                                                                                                                                                                                                               | ABC                                                                | The Public Health Agency of Sweden                                         | Department of Microbiology, The Public Health Agency of Sweden                                                                                                                                                                                                                                    |
| EPI_ISL_788999                                                                                                                                                                                                                                                                                                                                                                                                                                                               | Klinisk mikrobiologi, virus F68                                    | The Public Health Agency of Sweden                                         | Department of Microbiology, The Public Health Agency of Sweden                                                                                                                                                                                                                                    |
| EPI_ISL_789000, EPI_ISL_789001, EPI_ISL_789002, EPI_ISL_789003, EPI_ISL_789004, EPI_ISL_789005, EPI_ISL_789006, EPI_ISL_789007, EPI_ISL_789008, EPI_ISL_789009, EPI_ISL_789010, EPI_ISL_789011                                                                                                                                                                                                                                                                               |                                                                    |                                                                            |                                                                                                                                                                                                                                                                                                   |
| see above                                                                                                                                                                                                                                                                                                                                                                                                                                                                    | ABC                                                                | The Public Health Agency of Sweden                                         | Department of Microbiology, The Public Health Agency of Sweden                                                                                                                                                                                                                                    |
| EPI_ISL_789012, EPI_ISL_789013                                                                                                                                                                                                                                                                                                                                                                                                                                               | Klinisk mikrobiologi, Laboratoriemedicin                           | The Public Health Agency of Sweden                                         | Department of Microbiology, The Public Health Agency of Sweden                                                                                                                                                                                                                                    |
| EPI_ISL_789014, EPI_ISL_789015, EPI_ISL_789016                                                                                                                                                                                                                                                                                                                                                                                                                               | ABC                                                                | The Public Health Agency of Sweden                                         | Department of Microbiology, The Public Health Agency of Sweden                                                                                                                                                                                                                                    |
| EPI_ISL_789017                                                                                                                                                                                                                                                                                                                                                                                                                                                               | Klinisk Mikrobiologi                                               | The Public Health Agency of Sweden                                         | Department of Microbiology, The Public Health Agency of Sweden                                                                                                                                                                                                                                    |
| EPI_ISL_789018, EPI_ISL_789019, EPI_ISL_789020, EPI_ISL_789021, EPI_ISL_789022, EPI_ISL_789023, EPI_ISL_789024, EPI_ISL_789025, EPI_ISL_789026, EPI_ISL_789027, EPI_ISL_789028                                                                                                                                                                                                                                                                                               |                                                                    |                                                                            |                                                                                                                                                                                                                                                                                                   |
| see above                                                                                                                                                                                                                                                                                                                                                                                                                                                                    | ABC                                                                | The Public Health Agency of Sweden                                         | Department of Microbiology, The Public Health Agency of Sweden                                                                                                                                                                                                                                    |
| EPI_ISL_789029, EPI_ISL_789030, EPI_ISL_789032, EPI_ISL_789033, EPI_ISL_789034, EPI_ISL_789035                                                                                                                                                                                                                                                                                                                                                                               | Klinisk mikrobiologi, Laboratoriemedicin                           | The Public Health Agency of Sweden                                         | Department of Microbiology, The Public Health Agency of Sweden                                                                                                                                                                                                                                    |
| EPI_ISL_789036, EPI_ISL_789037, EPI_ISL_789038, EPI_ISL_789039, EPI_ISL_789040, EPI_ISL_789041, EPI_ISL_789042, EPI_ISL_789043, EPI_ISL_789044, EPI_ISL_789045                                                                                                                                                                                                                                                                                                               | Klinisk mikrobiologi                                               | The Public Health Agency of Sweden                                         | Department of Microbiology, The Public Health Agency of Sweden                                                                                                                                                                                                                                    |
| EPI_ISL_789046                                                                                                                                                                                                                                                                                                                                                                                                                                                               | unknown                                                            | The Public Health Agency of Sweden                                         | Department of Microbiology, The Public Health Agency of Sweden                                                                                                                                                                                                                                    |
| EPI_ISL_789047                                                                                                                                                                                                                                                                                                                                                                                                                                                               | Klinisk mikrobiologi                                               | The Public Health Agency of Sweden                                         | Department of Microbiology, The Public Health Agency of Sweden                                                                                                                                                                                                                                    |
| EPI_ISL_789048, EPI_ISL_789049, EPI_ISL_789050, EPI_ISL_789051, EPI_ISL_789052, EPI_ISL_789053                                                                                                                                                                                                                                                                                                                                                                               | Klinisk mikrobiologi, Viruslab                                     | The Public Health Agency of Sweden                                         | Department of Microbiology, The Public Health Agency of Sweden                                                                                                                                                                                                                                    |
| EPI_ISL_789054                                                                                                                                                                                                                                                                                                                                                                                                                                                               | Unilabs AB                                                         | The Public Health Agency of Sweden                                         | Department of Microbiology, The Public Health Agency of Sweden                                                                                                                                                                                                                                    |
| EPI_ISL_789055, EPI_ISL_789056, EPI_ISL_789057, EPI_ISL_789058, EPI_ISL_789059                                                                                                                                                                                                                                                                                                                                                                                               | Klinisk mikrobiologi, Viruslab                                     | The Public Health Agency of Sweden                                         | Department of Microbiology, The Public Health Agency of Sweden                                                                                                                                                                                                                                    |
| EPI_ISL_789064, EPI_ISL_789065, EPI_ISL_789066, EPI_ISL_789067, EPI_ISL_789070, EPI_ISL_789072, EPI_ISL_789073, EPI_ISL_789079, EPI_ISL_789087, EPI_ISL_789088, EPI_ISL_789089, EPI_ISL_789091, EPI_ISL_789093, EPI_ISL_789098                                                                                                                                                                                                                                               |                                                                    |                                                                            |                                                                                                                                                                                                                                                                                                   |
| see above                                                                                                                                                                                                                                                                                                                                                                                                                                                                    | National Virus Reference Laboratory                                | National Virus Reference Laboratory                                        | Michael Carr, Gabriel Gonzalez, Dana Alalwan, Jonathan Dean, Daniel Hare, Cillian F De Gascun                                                                                                                                                                                                     |
| EPI_ISL_790571, EPI_ISL_790572, EPI_ISL_790573, EPI_ISL_790574, EPI_ISL_790575, EPI_ISL_790576, EPI_ISL_790577, EPI_ISL_790579, EPI_ISL_790580, EPI_ISL_790581, EPI_ISL_790582, EPI_ISL_790583, EPI_ISL_790584, EPI_ISL_790585, EPI_ISL_790586, EPI_ISL_790587, EPI_ISL_790589, EPI_ISL_790590, EPI_ISL_790591, EPI_ISL_790592, EPI_ISL_790593, EPI_ISL_790594, EPI_ISL_790596, EPI_ISL_790598, EPI_ISL_790599, EPI_ISL_790600, EPI_ISL_790601, EPI_ISL_790602, EPI_ISL_7906 |                                                                    |                                                                            |                                                                                                                                                                                                                                                                                                   |









[illegible]





[illegible]

[illegible]



[illegible]

[illegible]

[illegible]

[illegible]

[illegible]



[illegible]

[illegible]

[illegible]

[illegible]

[illegible]

[illegible]

[illegible]

[illegible]





















[illegible]

[illegible]

[illegible]

[illegible]

[illegible]



[illegible]

[illegible]







|                                                                                                                                                                                                                                                                                                                                                                                                                                                                                                                                                                                                                                                                                                                                                                                                                                                                                                                                |                                                       |                                                                                                                        |                                                                                                                                                                                                                                                                                                             |
|--------------------------------------------------------------------------------------------------------------------------------------------------------------------------------------------------------------------------------------------------------------------------------------------------------------------------------------------------------------------------------------------------------------------------------------------------------------------------------------------------------------------------------------------------------------------------------------------------------------------------------------------------------------------------------------------------------------------------------------------------------------------------------------------------------------------------------------------------------------------------------------------------------------------------------|-------------------------------------------------------|------------------------------------------------------------------------------------------------------------------------|-------------------------------------------------------------------------------------------------------------------------------------------------------------------------------------------------------------------------------------------------------------------------------------------------------------|
| EPI_ISL_800832                                                                                                                                                                                                                                                                                                                                                                                                                                                                                                                                                                                                                                                                                                                                                                                                                                                                                                                 | Lighthouse Lab in Cambridge                           | Wellcome Sanger Institute for the COVID-19 Genomics UK (COG-UK) Consortium                                             | Rob Howes, The Lighthouse Lab in Cambridge and Alex Alderton, Roberto Amato, Sonia Goncalves, Ewan Harrison, David K. Jackson, Ian Johnston, Dominic Kwiatkowski, Cordelia Langford, John Sillitoe on behalf of the Wellcome Sanger Institute COVID-19 Surveillance Team                                    |
| EPI_ISL_800833, EPI_ISL_800835, EPI_ISL_800838                                                                                                                                                                                                                                                                                                                                                                                                                                                                                                                                                                                                                                                                                                                                                                                                                                                                                 | Lighthouse Lab in Glasgow                             | Wellcome Sanger Institute for the COVID-19 Genomics UK (COG-UK) Consortium                                             | Harper VanSteenhouse, Yumi Kasai, David Gray, Carol Clugston, Anna Dominiczak and Alex Alderton, Roberto Amato, Sonia Goncalves, Ewan Harrison, David K. Jackson, Ian Johnston, Dominic Kwiatkowski, Cordelia Langford, John Sillitoe on behalf of the Wellcome Sanger Institute COVID-19 Surveillance Team |
| EPI_ISL_800839                                                                                                                                                                                                                                                                                                                                                                                                                                                                                                                                                                                                                                                                                                                                                                                                                                                                                                                 | Lighthouse Lab in Cambridge                           | Wellcome Sanger Institute for the COVID-19 Genomics UK (COG-UK) Consortium                                             | Rob Howes, The Lighthouse Lab in Cambridge and Alex Alderton, Roberto Amato, Sonia Goncalves, Ewan Harrison, David K. Jackson, Ian Johnston, Dominic Kwiatkowski, Cordelia Langford, John Sillitoe on behalf of the Wellcome Sanger Institute COVID-19 Surveillance Team                                    |
| EPI_ISL_800841, EPI_ISL_800843                                                                                                                                                                                                                                                                                                                                                                                                                                                                                                                                                                                                                                                                                                                                                                                                                                                                                                 | Lighthouse Lab in Glasgow                             | Wellcome Sanger Institute for the COVID-19 Genomics UK (COG-UK) Consortium                                             | Harper VanSteenhouse, Yumi Kasai, David Gray, Carol Clugston, Anna Dominiczak and Alex Alderton, Roberto Amato, Sonia Goncalves, Ewan Harrison, David K. Jackson, Ian Johnston, Dominic Kwiatkowski, Cordelia Langford, John Sillitoe on behalf of the Wellcome Sanger Institute COVID-19 Surveillance Team |
| EPI_ISL_800846                                                                                                                                                                                                                                                                                                                                                                                                                                                                                                                                                                                                                                                                                                                                                                                                                                                                                                                 | Lighthouse Lab in Milton Keynes                       | Wellcome Sanger Institute for the COVID-19 Genomics UK (COG-UK) Consortium                                             | The Lighthouse Lab in Milton Keynes and Alex Alderton, Roberto Amato, Sonia Goncalves, Ewan Harrison, David K. Jackson, Ian Johnston, Dominic Kwiatkowski, Cordelia Langford, John Sillitoe on behalf of the Wellcome Sanger Institute COVID-19 Surveillance Team                                           |
| EPI_ISL_800847                                                                                                                                                                                                                                                                                                                                                                                                                                                                                                                                                                                                                                                                                                                                                                                                                                                                                                                 | Lighthouse Lab in Glasgow                             | Wellcome Sanger Institute for the COVID-19 Genomics UK (COG-UK) Consortium                                             | Harper VanSteenhouse, Yumi Kasai, David Gray, Carol Clugston, Anna Dominiczak and Alex Alderton, Roberto Amato, Sonia Goncalves, Ewan Harrison, David K. Jackson, Ian Johnston, Dominic Kwiatkowski, Cordelia Langford, John Sillitoe on behalf of the Wellcome Sanger Institute COVID-19 Surveillance Team |
| EPI_ISL_800849                                                                                                                                                                                                                                                                                                                                                                                                                                                                                                                                                                                                                                                                                                                                                                                                                                                                                                                 | Lighthouse Lab in Milton Keynes                       | Wellcome Sanger Institute for the COVID-19 Genomics UK (COG-UK) Consortium                                             | The Lighthouse Lab in Milton Keynes and Alex Alderton, Roberto Amato, Sonia Goncalves, Ewan Harrison, David K. Jackson, Ian Johnston, Dominic Kwiatkowski, Cordelia Langford, John Sillitoe on behalf of the Wellcome Sanger Institute COVID-19 Surveillance Team                                           |
| EPI_ISL_800851                                                                                                                                                                                                                                                                                                                                                                                                                                                                                                                                                                                                                                                                                                                                                                                                                                                                                                                 | Lighthouse Lab in Glasgow                             | Wellcome Sanger Institute for the COVID-19 Genomics UK (COG-UK) Consortium                                             | Harper VanSteenhouse, Yumi Kasai, David Gray, Carol Clugston, Anna Dominiczak and Alex Alderton, Roberto Amato, Sonia Goncalves, Ewan Harrison, David K. Jackson, Ian Johnston, Dominic Kwiatkowski, Cordelia Langford, John Sillitoe on behalf of the Wellcome Sanger Institute COVID-19 Surveillance Team |
| EPI_ISL_800853, EPI_ISL_800854, EPI_ISL_800855                                                                                                                                                                                                                                                                                                                                                                                                                                                                                                                                                                                                                                                                                                                                                                                                                                                                                 | Lighthouse Lab in Cambridge                           | Wellcome Sanger Institute for the COVID-19 Genomics UK (COG-UK) Consortium                                             | Rob Howes, The Lighthouse Lab in Cambridge and Alex Alderton, Roberto Amato, Sonia Goncalves, Ewan Harrison, David K. Jackson, Ian Johnston, Dominic Kwiatkowski, Cordelia Langford, John Sillitoe on behalf of the Wellcome Sanger Institute COVID-19 Surveillance Team                                    |
| EPI_ISL_800857                                                                                                                                                                                                                                                                                                                                                                                                                                                                                                                                                                                                                                                                                                                                                                                                                                                                                                                 | Lighthouse Lab in Milton Keynes                       | Wellcome Sanger Institute for the COVID-19 Genomics UK (COG-UK) Consortium                                             | The Lighthouse Lab in Milton Keynes and Alex Alderton, Roberto Amato, Sonia Goncalves, Ewan Harrison, David K. Jackson, Ian Johnston, Dominic Kwiatkowski, Cordelia Langford, John Sillitoe on behalf of the Wellcome Sanger Institute COVID-19 Surveillance Team                                           |
| EPI_ISL_800858, EPI_ISL_800860, EPI_ISL_800861, EPI_ISL_800862                                                                                                                                                                                                                                                                                                                                                                                                                                                                                                                                                                                                                                                                                                                                                                                                                                                                 | Lighthouse Lab in Glasgow                             | Wellcome Sanger Institute for the COVID-19 Genomics UK (COG-UK) Consortium                                             | Harper VanSteenhouse, Yumi Kasai, David Gray, Carol Clugston, Anna Dominiczak and Alex Alderton, Roberto Amato, Sonia Goncalves, Ewan Harrison, David K. Jackson, Ian Johnston, Dominic Kwiatkowski, Cordelia Langford, John Sillitoe on behalf of the Wellcome Sanger Institute COVID-19 Surveillance Team |
| EPI_ISL_800863, EPI_ISL_800864, EPI_ISL_800867, EPI_ISL_800868                                                                                                                                                                                                                                                                                                                                                                                                                                                                                                                                                                                                                                                                                                                                                                                                                                                                 | Lighthouse Lab in Milton Keynes                       | Wellcome Sanger Institute for the COVID-19 Genomics UK (COG-UK) Consortium                                             | The Lighthouse Lab in Milton Keynes and Alex Alderton, Roberto Amato, Sonia Goncalves, Ewan Harrison, David K. Jackson, Ian Johnston, Dominic Kwiatkowski, Cordelia Langford, John Sillitoe on behalf of the Wellcome Sanger Institute COVID-19 Surveillance Team                                           |
| EPI_ISL_800869                                                                                                                                                                                                                                                                                                                                                                                                                                                                                                                                                                                                                                                                                                                                                                                                                                                                                                                 | Lighthouse Lab in Glasgow                             | Wellcome Sanger Institute for the COVID-19 Genomics UK (COG-UK) Consortium                                             | Harper VanSteenhouse, Yumi Kasai, David Gray, Carol Clugston, Anna Dominiczak and Alex Alderton, Roberto Amato, Sonia Goncalves, Ewan Harrison, David K. Jackson, Ian Johnston, Dominic Kwiatkowski, Cordelia Langford, John Sillitoe on behalf of the Wellcome Sanger Institute COVID-19 Surveillance Team |
| EPI_ISL_800870                                                                                                                                                                                                                                                                                                                                                                                                                                                                                                                                                                                                                                                                                                                                                                                                                                                                                                                 | Lighthouse Lab in Cambridge                           | Wellcome Sanger Institute for the COVID-19 Genomics UK (COG-UK) Consortium                                             | Rob Howes, The Lighthouse Lab in Cambridge and Alex Alderton, Roberto Amato, Sonia Goncalves, Ewan Harrison, David K. Jackson, Ian Johnston, Dominic Kwiatkowski, Cordelia Langford, John Sillitoe on behalf of the Wellcome Sanger Institute COVID-19 Surveillance Team                                    |
| EPI_ISL_800871                                                                                                                                                                                                                                                                                                                                                                                                                                                                                                                                                                                                                                                                                                                                                                                                                                                                                                                 | Lighthouse Lab in Milton Keynes                       | Wellcome Sanger Institute for the COVID-19 Genomics UK (COG-UK) Consortium                                             | The Lighthouse Lab in Milton Keynes and Alex Alderton, Roberto Amato, Sonia Goncalves, Ewan Harrison, David K. Jackson, Ian Johnston, Dominic Kwiatkowski, Cordelia Langford, John Sillitoe on behalf of the Wellcome Sanger Institute COVID-19 Surveillance Team                                           |
| EPI_ISL_800873                                                                                                                                                                                                                                                                                                                                                                                                                                                                                                                                                                                                                                                                                                                                                                                                                                                                                                                 | Lighthouse Lab in Cambridge                           | Wellcome Sanger Institute for the COVID-19 Genomics UK (COG-UK) Consortium                                             | Rob Howes, The Lighthouse Lab in Cambridge and Alex Alderton, Roberto Amato, Sonia Goncalves, Ewan Harrison, David K. Jackson, Ian Johnston, Dominic Kwiatkowski, Cordelia Langford, John Sillitoe on behalf of the Wellcome Sanger Institute COVID-19 Surveillance Team                                    |
| EPI_ISL_800874, EPI_ISL_800875                                                                                                                                                                                                                                                                                                                                                                                                                                                                                                                                                                                                                                                                                                                                                                                                                                                                                                 | Lighthouse Lab in Glasgow                             | Wellcome Sanger Institute for the COVID-19 Genomics UK (COG-UK) Consortium                                             | Harper VanSteenhouse, Yumi Kasai, David Gray, Carol Clugston, Anna Dominiczak and Alex Alderton, Roberto Amato, Sonia Goncalves, Ewan Harrison, David K. Jackson, Ian Johnston, Dominic Kwiatkowski, Cordelia Langford, John Sillitoe on behalf of the Wellcome Sanger Institute COVID-19 Surveillance Team |
| EPI_ISL_800878, EPI_ISL_800879, EPI_ISL_800881                                                                                                                                                                                                                                                                                                                                                                                                                                                                                                                                                                                                                                                                                                                                                                                                                                                                                 | Lighthouse Lab in Milton Keynes                       | Wellcome Sanger Institute for the COVID-19 Genomics UK (COG-UK) Consortium                                             | The Lighthouse Lab in Milton Keynes and Alex Alderton, Roberto Amato, Sonia Goncalves, Ewan Harrison, David K. Jackson, Ian Johnston, Dominic Kwiatkowski, Cordelia Langford, John Sillitoe on behalf of the Wellcome Sanger Institute COVID-19 Surveillance Team                                           |
| EPI_ISL_800882                                                                                                                                                                                                                                                                                                                                                                                                                                                                                                                                                                                                                                                                                                                                                                                                                                                                                                                 | Lighthouse Lab in Glasgow                             | Wellcome Sanger Institute for the COVID-19 Genomics UK (COG-UK) Consortium                                             | Harper VanSteenhouse, Yumi Kasai, David Gray, Carol Clugston, Anna Dominiczak and Alex Alderton, Roberto Amato, Sonia Goncalves, Ewan Harrison, David K. Jackson, Ian Johnston, Dominic Kwiatkowski, Cordelia Langford, John Sillitoe on behalf of the Wellcome Sanger Institute COVID-19 Surveillance Team |
| EPI_ISL_800883                                                                                                                                                                                                                                                                                                                                                                                                                                                                                                                                                                                                                                                                                                                                                                                                                                                                                                                 | Lighthouse Lab in Cambridge                           | Wellcome Sanger Institute for the COVID-19 Genomics UK (COG-UK) Consortium                                             | Rob Howes, The Lighthouse Lab in Cambridge and Alex Alderton, Roberto Amato, Sonia Goncalves, Ewan Harrison, David K. Jackson, Ian Johnston, Dominic Kwiatkowski, Cordelia Langford, John Sillitoe on behalf of the Wellcome Sanger Institute COVID-19 Surveillance Team                                    |
| EPI_ISL_800884, EPI_ISL_801179                                                                                                                                                                                                                                                                                                                                                                                                                                                                                                                                                                                                                                                                                                                                                                                                                                                                                                 | Lighthouse Lab in Glasgow                             | Wellcome Sanger Institute for the COVID-19 Genomics UK (COG-UK) Consortium                                             | Harper VanSteenhouse, Yumi Kasai, David Gray, Carol Clugston, Anna Dominiczak and Alex Alderton, Roberto Amato, Sonia Goncalves, Ewan Harrison, David K. Jackson, Ian Johnston, Dominic Kwiatkowski, Cordelia Langford, John Sillitoe on behalf of the Wellcome Sanger Institute COVID-19 Surveillance Team |
| EPI_ISL_801180, EPI_ISL_801181                                                                                                                                                                                                                                                                                                                                                                                                                                                                                                                                                                                                                                                                                                                                                                                                                                                                                                 | Lighthouse Lab in Milton Keynes                       | Wellcome Sanger Institute for the COVID-19 Genomics UK (COG-UK) Consortium                                             | The Lighthouse Lab in Milton Keynes and Alex Alderton, Roberto Amato, Sonia Goncalves, Ewan Harrison, David K. Jackson, Ian Johnston, Dominic Kwiatkowski, Cordelia Langford, John Sillitoe on behalf of the Wellcome Sanger Institute COVID-19 Surveillance Team                                           |
| EPI_ISL_801422, EPI_ISL_801432, EPI_ISL_801433, EPI_ISL_801434, EPI_ISL_801435, EPI_ISL_801436, EPI_ISL_801437, EPI_ISL_801438, EPI_ISL_801439, EPI_ISL_801440, EPI_ISL_801443, EPI_ISL_801444, EPI_ISL_801445, EPI_ISL_801446, EPI_ISL_801447, EPI_ISL_801448, EPI_ISL_801451, EPI_ISL_801452, EPI_ISL_801453, EPI_ISL_801454, EPI_ISL_801455, EPI_ISL_801456, EPI_ISL_801457, EPI_ISL_801458, EPI_ISL_801459, EPI_ISL_801471, EPI_ISL_801472, EPI_ISL_801473, EPI_ISL_801474, EPI_ISL_801476, EPI_ISL_801479, EPI_ISL_801480, EPI_ISL_801491, EPI_ISL_801492, EPI_ISL_801493, EPI_ISL_801494, EPI_ISL_801495, EPI_ISL_801496, EPI_ISL_801497, EPI_ISL_801498, EPI_ISL_801499, EPI_ISL_801500, EPI_ISL_801501, EPI_ISL_801502, EPI_ISL_801503, EPI_ISL_801504, EPI_ISL_801505, EPI_ISL_801506, EPI_ISL_801507, EPI_ISL_801508, EPI_ISL_801509, EPI_ISL_801510, EPI_ISL_801511, EPI_ISL_801512, EPI_ISL_801513, EPI_ISL_801515 |                                                       |                                                                                                                        |                                                                                                                                                                                                                                                                                                             |
| see above                                                                                                                                                                                                                                                                                                                                                                                                                                                                                                                                                                                                                                                                                                                                                                                                                                                                                                                      | Dutch COVID-19 response team                          | Erasmus Medical Center                                                                                                 | Bas Oude Munnink, Reina Sikkema, David Nieuwenhuijse, Irina Chestakova, Anne van der Linden, Marjan Boter, Emmanuelle Munger, Corine GeurtsvanKessel, Anнемiek van der Eijk, Richard Molenkamp, Marion Koopmans, on behalf of the Dutch national COVID-19 response team.                                    |
| EPI_ISL_801517, EPI_ISL_801518                                                                                                                                                                                                                                                                                                                                                                                                                                                                                                                                                                                                                                                                                                                                                                                                                                                                                                 | Instituto Nacional de Saude (INSA)                    | Instituto Nacional de Saude (INSA)                                                                                     | Borges et al                                                                                                                                                                                                                                                                                                |
| EPI_ISL_801523, EPI_ISL_801524, EPI_ISL_801526, EPI_ISL_801528, EPI_ISL_801536                                                                                                                                                                                                                                                                                                                                                                                                                                                                                                                                                                                                                                                                                                                                                                                                                                                 | Sonic Reference Laboratory                            | Pathogen Discovery, Respiratory Viruses Branch, Division of Viral Diseases, Centers for Disease Control and Prevention | Ying Tao, Yan Li, Jing Zhang, Krista Queen, Anna Uehara, Peter Cook, Clinton R. Paden, Haibin Wang, Suxiang Tong                                                                                                                                                                                            |
| EPI_ISL_801537                                                                                                                                                                                                                                                                                                                                                                                                                                                                                                                                                                                                                                                                                                                                                                                                                                                                                                                 | Sunrise Medical Labs                                  | Pathogen Discovery, Respiratory Viruses Branch, Division of Viral Diseases, Centers for Disease Control and Prevention | Ying Tao, Yan Li, Jing Zhang, Krista Queen, Anna Uehara, Peter Cook, Clinton R. Paden, Haibin Wang, Suxiang Tong                                                                                                                                                                                            |
| EPI_ISL_802441, EPI_ISL_802443                                                                                                                                                                                                                                                                                                                                                                                                                                                                                                                                                                                                                                                                                                                                                                                                                                                                                                 | WESTCHESTER MEDICAL CENTER                            | Wadsworth Center, New York State Department.of Health                                                                  | Kirsten St. George, Daryl M. Lamson, Alexis Russel, Matthew Shudt, Melissa A Leisner, Jonathan Plitnick, Navjot Singh, John Kelly, Sara Griesemer, Erasmus Schneider, Erica Lasek-Nesselquist                                                                                                               |
| EPI_ISL_802444                                                                                                                                                                                                                                                                                                                                                                                                                                                                                                                                                                                                                                                                                                                                                                                                                                                                                                                 | SUNRISE MEDICAL LABORATORIES                          | Wadsworth Center, New York State Department.of Health                                                                  | Kirsten St. George, Daryl M. Lamson, Alexis Russel, Matthew Shudt, Melissa A Leisner, Jonathan Plitnick, Navjot Singh, John Kelly, Sara Griesemer, Erasmus Schneider, Erica Lasek-Nesselquist                                                                                                               |
| EPI_ISL_802449, EPI_ISL_802450, EPI_ISL_802454, EPI_ISL_802459,                                                                                                                                                                                                                                                                                                                                                                                                                                                                                                                                                                                                                                                                                                                                                                                                                                                                | Wadsworth Center, New York State Department.of Health | Wadsworth Center, New York State Department.of Health                                                                  | Kirsten St. George, Daryl M. Lamson, Alexis Russel, Matthew Shudt, Melissa A Leisner, Jonathan Plitnick, Navjot Singh, John Kelly, Sara Griesemer, Erasmus Schneider, Erica Lasek-Nesselquist                                                                                                               |

|                                                                                                                                                                                                                                                                                                                                                                                                                                                                                                                                                                                                                                                                                                                                                                                                                                                                                                                                                |                                                                                                   |                                                                                                                            |                                                                                                                                                                                                                                                                                                                                                                                                                                                                                                                                                                                  |
|------------------------------------------------------------------------------------------------------------------------------------------------------------------------------------------------------------------------------------------------------------------------------------------------------------------------------------------------------------------------------------------------------------------------------------------------------------------------------------------------------------------------------------------------------------------------------------------------------------------------------------------------------------------------------------------------------------------------------------------------------------------------------------------------------------------------------------------------------------------------------------------------------------------------------------------------|---------------------------------------------------------------------------------------------------|----------------------------------------------------------------------------------------------------------------------------|----------------------------------------------------------------------------------------------------------------------------------------------------------------------------------------------------------------------------------------------------------------------------------------------------------------------------------------------------------------------------------------------------------------------------------------------------------------------------------------------------------------------------------------------------------------------------------|
| EPI_ISL_802460, EPI_ISL_802461, EPI_ISL_802462, EPI_ISL_802465, EPI_ISL_802466                                                                                                                                                                                                                                                                                                                                                                                                                                                                                                                                                                                                                                                                                                                                                                                                                                                                 |                                                                                                   |                                                                                                                            |                                                                                                                                                                                                                                                                                                                                                                                                                                                                                                                                                                                  |
| EPI_ISL_802471, EPI_ISL_802473, EPI_ISL_802480, EPI_ISL_802482, EPI_ISL_802483, EPI_ISL_802485, EPI_ISL_802488                                                                                                                                                                                                                                                                                                                                                                                                                                                                                                                                                                                                                                                                                                                                                                                                                                 | WESTCHESTER MEDICAL CENTER                                                                        | Wadsworth Center, New York State Department.of Health                                                                      | Kirsten St. George, Daryl M. Lamson, Alexis Russel, Matthew Shudt, Melissa A Leisner, Jonathan Plitnick, Navjot Singh, John Kelly, Sara Griesemer, Erasmus Schneider, Erica Lasek-Nesselquist                                                                                                                                                                                                                                                                                                                                                                                    |
| EPI_ISL_802521, EPI_ISL_802522, EPI_ISL_802523, EPI_ISL_802525, EPI_ISL_802531, EPI_ISL_802532, EPI_ISL_802533, EPI_ISL_802537, EPI_ISL_802538, EPI_ISL_802539, EPI_ISL_802540, EPI_ISL_802542, EPI_ISL_802543                                                                                                                                                                                                                                                                                                                                                                                                                                                                                                                                                                                                                                                                                                                                 |                                                                                                   |                                                                                                                            |                                                                                                                                                                                                                                                                                                                                                                                                                                                                                                                                                                                  |
| see above                                                                                                                                                                                                                                                                                                                                                                                                                                                                                                                                                                                                                                                                                                                                                                                                                                                                                                                                      | Dutch COVID-19 response team                                                                      | Erasmus Medical Center                                                                                                     | Bas Oude Munnink, Reina Sikkema, David Nieuwenhuijse, Irina Chestakova, Anne van der Linden, Marjan Boter, Emmanuelle Munger, Corine GeurtsvanKessel, Anнемiek van der Eijk, Richard Molenkamp, Marion Koopmans, on behalf of the Dutch national COVID-19 response team.                                                                                                                                                                                                                                                                                                         |
| EPI_ISL_802571                                                                                                                                                                                                                                                                                                                                                                                                                                                                                                                                                                                                                                                                                                                                                                                                                                                                                                                                 | Essentia Health-St. Mary's Medical Center                                                         | Minnesota Department of Health, Public Health Laboratory                                                                   | Alexandra Lorentz, Jacob Garfin, Matt Plumb, and Xiong Wang                                                                                                                                                                                                                                                                                                                                                                                                                                                                                                                      |
| EPI_ISL_802573                                                                                                                                                                                                                                                                                                                                                                                                                                                                                                                                                                                                                                                                                                                                                                                                                                                                                                                                 | M Health Fairview                                                                                 | Minnesota Department of Health, Public Health Laboratory                                                                   | Alexandra Lorentz, Jacob Garfin, Matt Plumb, and Xiong Wang                                                                                                                                                                                                                                                                                                                                                                                                                                                                                                                      |
| EPI_ISL_802574, EPI_ISL_802577, EPI_ISL_802578, EPI_ISL_802579, EPI_ISL_802580, EPI_ISL_802581, EPI_ISL_802582, EPI_ISL_802583, EPI_ISL_802584, EPI_ISL_802585, EPI_ISL_802586, EPI_ISL_802587, EPI_ISL_802588, EPI_ISL_802589, EPI_ISL_802590, EPI_ISL_802591, EPI_ISL_802592, EPI_ISL_802593, EPI_ISL_802594, EPI_ISL_802596, EPI_ISL_802597, EPI_ISL_802598                                                                                                                                                                                                                                                                                                                                                                                                                                                                                                                                                                                 |                                                                                                   |                                                                                                                            |                                                                                                                                                                                                                                                                                                                                                                                                                                                                                                                                                                                  |
| see above                                                                                                                                                                                                                                                                                                                                                                                                                                                                                                                                                                                                                                                                                                                                                                                                                                                                                                                                      | Vault Health                                                                                      | Minnesota Department of Health, Public Health Laboratory                                                                   | Alexandra Lorentz, Jacob Garfin, Matt Plumb, and Xiong Wang                                                                                                                                                                                                                                                                                                                                                                                                                                                                                                                      |
| EPI_ISL_802656, EPI_ISL_802672, EPI_ISL_802702                                                                                                                                                                                                                                                                                                                                                                                                                                                                                                                                                                                                                                                                                                                                                                                                                                                                                                 | Helix/Illumina                                                                                    | Genomics and Discovery, Respiratory Viruses Branch, Division of Viral Diseases, Centers for Disease Control and Prevention | Peter W. Cook, Dhwaní Batra, Ben L. Rambo-Martin Eileen de Feo, Jan Antico, Christine Tran, Matthew Tolentino, Shannon Wickline, Kim Gietzen, Brad Sickler, Jingtao Liu, Eric Allen, Phil Febbo, Summer Galloway, Nicole L. Washington, Simon White, Geraint Levan, Kelly Schiabor Barrett, Elizabeth Cirulli, Alexandre Bolze, Ary Ascencio, Charlotte Rivera-Garcia, Ryan Cho, Jason Nguyen, Sherry Wang, Jimmy Ramirez, Tyler Cassens, Efrén Sandoval, Magnus Isaksson, William Lee, David Becker, Marc Laurent, James Lu, Clinton R. Paden, Suixiang Tong, Duncan MacCannell |
| EPI_ISL_802725                                                                                                                                                                                                                                                                                                                                                                                                                                                                                                                                                                                                                                                                                                                                                                                                                                                                                                                                 | Florida Bureau of Public Health Laboratories                                                      | Florida Bureau of Public Health Laboratories                                                                               | Sarah Schmedes, Jason Blanton                                                                                                                                                                                                                                                                                                                                                                                                                                                                                                                                                    |
| EPI_ISL_802783, EPI_ISL_802784, EPI_ISL_802786, EPI_ISL_802787                                                                                                                                                                                                                                                                                                                                                                                                                                                                                                                                                                                                                                                                                                                                                                                                                                                                                 | Columbia University Irving Medical Center                                                         | Wadsworth Center, New York State Department.of Health                                                                      | Kirsten St. George, Daryl M. Lamson, Alexis Russel, Matthew Shudt, Melissa A Leisner, Jonathan Plitnick, Navjot Singh, John Kelly, Sara Griesemer, Erasmus Schneider, Erica Lasek-Nesselquist                                                                                                                                                                                                                                                                                                                                                                                    |
| EPI_ISL_802995                                                                                                                                                                                                                                                                                                                                                                                                                                                                                                                                                                                                                                                                                                                                                                                                                                                                                                                                 | Charite Universitätsmedizin Berlin, Institut für Virologie, Charitéplatz 1, 10117 Berlin, Germany | Charite Universitätsmedizin Berlin, Institut für Virologie, Charitéplatz 1, 10117 Berlin, Germany                          | Victor M Corman, Tobias Bleicker, Julia Tesch, Jörn Beheim-Schwarzbach, Barbara Mühlemann, Talitha Veith, Julia Schneider, Terry Jones, Christian Drosten                                                                                                                                                                                                                                                                                                                                                                                                                        |
| EPI_ISL_802996, EPI_ISL_802997, EPI_ISL_802999, EPI_ISL_803000, EPI_ISL_803001, EPI_ISL_803004, EPI_ISL_803006, EPI_ISL_803008, EPI_ISL_803009, EPI_ISL_803012, EPI_ISL_803014, EPI_ISL_803018, EPI_ISL_803019, EPI_ISL_803021, EPI_ISL_803023, EPI_ISL_803028, EPI_ISL_803029, EPI_ISL_803035, EPI_ISL_803036, EPI_ISL_803037, EPI_ISL_803041, EPI_ISL_803043, EPI_ISL_803044, EPI_ISL_803045, EPI_ISL_803046, EPI_ISL_803047, EPI_ISL_803051, EPI_ISL_803053, EPI_ISL_803055, EPI_ISL_803056, EPI_ISL_803058, EPI_ISL_803060, EPI_ISL_803062, EPI_ISL_803067, EPI_ISL_803068, EPI_ISL_803071, EPI_ISL_803072, EPI_ISL_803074, EPI_ISL_803078, EPI_ISL_803082, EPI_ISL_803084, EPI_ISL_803087, EPI_ISL_803089, EPI_ISL_803090, EPI_ISL_803091, EPI_ISL_803092, EPI_ISL_803093, EPI_ISL_803094, EPI_ISL_803096                                                                                                                                 |                                                                                                   |                                                                                                                            |                                                                                                                                                                                                                                                                                                                                                                                                                                                                                                                                                                                  |
| see above                                                                                                                                                                                                                                                                                                                                                                                                                                                                                                                                                                                                                                                                                                                                                                                                                                                                                                                                      | Quest Diagnostics                                                                                 | Quest Diagnostics                                                                                                          | Rosenthal,S.H., Gerasimova,A., Kagan,R.M., Anderson, B., Livingston, K.E., Hua, M., Liu Y., Shalhout, D.F., Owen, R., Lacbawan, F.                                                                                                                                                                                                                                                                                                                                                                                                                                               |
| EPI_ISL_803854, EPI_ISL_803855                                                                                                                                                                                                                                                                                                                                                                                                                                                                                                                                                                                                                                                                                                                                                                                                                                                                                                                 | Hospital General Universitario Gregorio Marañón                                                   | Hospital General Universitario Gregorio Marañón                                                                            | Sergio Buenestado Serrano, Pedro Sola Campoy, Laura Pérez-Lago, Pilar Catalán, Patricia Muñoz, Darío García de Viedma                                                                                                                                                                                                                                                                                                                                                                                                                                                            |
| EPI_ISL_803863                                                                                                                                                                                                                                                                                                                                                                                                                                                                                                                                                                                                                                                                                                                                                                                                                                                                                                                                 | Hospital General Universitario Gregorio Marañón                                                   | Hospital General Universitario Gregorio Marañón                                                                            | Sergio Buenestado Serrano, Pedro Sola Campoy, Laura Pérez-Lago, Pilar Catalán, Patricia Muñoz, Darío García de Viedma.                                                                                                                                                                                                                                                                                                                                                                                                                                                           |
| EPI_ISL_803896                                                                                                                                                                                                                                                                                                                                                                                                                                                                                                                                                                                                                                                                                                                                                                                                                                                                                                                                 | Virology Unit, Pisa University Hospital and Retrovirus Center, University of Pisa                 | National Institute for Infectious Diseases, INMI, "L. Spallanzani" IRCCS                                                   | M Rueca, E Giombini, C.E.M Gruber, B Bartolini, O Butera, F Messina, A Rosellini, P Mazzetti, M Pistello, A Di Caro, MR Capobianchi                                                                                                                                                                                                                                                                                                                                                                                                                                              |
| EPI_ISL_803897                                                                                                                                                                                                                                                                                                                                                                                                                                                                                                                                                                                                                                                                                                                                                                                                                                                                                                                                 | National Institute for Infectious Diseases, INMI, "L. Spallanzani" IRCCS                          | National Institute for Infectious Diseases, INMI, "L. Spallanzani" IRCCS                                                   | F Messina, O Butera, E Giombini, M Rueca, B Bartolini, C.E.M Gruber, MR Capobianchi, A Di Caro                                                                                                                                                                                                                                                                                                                                                                                                                                                                                   |
| EPI_ISL_803898                                                                                                                                                                                                                                                                                                                                                                                                                                                                                                                                                                                                                                                                                                                                                                                                                                                                                                                                 | National Institute for Infectious Diseases, INMI, "L. Spallanzani" IRCCS                          | National Institute for Infectious Diseases, INMI, "L. Spallanzani" IRCCS                                                   | C.E.M Gruber, B Bartolini, E Giombini, M Rueca, O Butera, F Messina, A Di Caro, MR Capobianchi                                                                                                                                                                                                                                                                                                                                                                                                                                                                                   |
| EPI_ISL_803900                                                                                                                                                                                                                                                                                                                                                                                                                                                                                                                                                                                                                                                                                                                                                                                                                                                                                                                                 | National Institute for Infectious Diseases, INMI, "L. Spallanzani" IRCCS                          | National Institute for Infectious Diseases, INMI, "L. Spallanzani" IRCCS                                                   | B Bartolini, O Butera, C.E.M Gruber, M Rueca, F Messina, E Giombini, MR Capobianchi, A Di Caro                                                                                                                                                                                                                                                                                                                                                                                                                                                                                   |
| EPI_ISL_803961, EPI_ISL_803966, EPI_ISL_803983, EPI_ISL_803986                                                                                                                                                                                                                                                                                                                                                                                                                                                                                                                                                                                                                                                                                                                                                                                                                                                                                 | National Public Health Laboratory, National Centre for Infectious Diseases                        | National Public Health Laboratory, National Centre for Infectious Diseases                                                 | Tze Minn Mak, Sophie Octavia, Zhenyang Zhou, Lin Cui, Raymond Tzer Pin Lin                                                                                                                                                                                                                                                                                                                                                                                                                                                                                                       |
| EPI_ISL_804019, EPI_ISL_804020, EPI_ISL_804021, EPI_ISL_804022, EPI_ISL_804023, EPI_ISL_804024, EPI_ISL_804025, EPI_ISL_804026, EPI_ISL_804027, EPI_ISL_804029, EPI_ISL_804030, EPI_ISL_804031, EPI_ISL_804032, EPI_ISL_804033, EPI_ISL_804034, EPI_ISL_804035, EPI_ISL_804036                                                                                                                                                                                                                                                                                                                                                                                                                                                                                                                                                                                                                                                                 |                                                                                                   |                                                                                                                            |                                                                                                                                                                                                                                                                                                                                                                                                                                                                                                                                                                                  |
| see above                                                                                                                                                                                                                                                                                                                                                                                                                                                                                                                                                                                                                                                                                                                                                                                                                                                                                                                                      | Maryland Public Health Laboratory                                                                 | Maryland Public Health Laboratory                                                                                          | Maryland Department of Health Laboratories Administration                                                                                                                                                                                                                                                                                                                                                                                                                                                                                                                        |
| EPI_ISL_804074, EPI_ISL_804075, EPI_ISL_804095, EPI_ISL_804140, EPI_ISL_804150, EPI_ISL_804178                                                                                                                                                                                                                                                                                                                                                                                                                                                                                                                                                                                                                                                                                                                                                                                                                                                 | Israel Central Virology laboratory                                                                | Israel National Consortium for SARS-CoV-2 sequencing                                                                       | Neta Zuckerman, Efrat Dahan Bucris, Michal Mandelboim, Dana Bar-Ilan, Oran Erster, Tzvia Mann, Omer Murik, David A. Zeevi, Assaf Rokney, Joseph Jaffe, Eva Nachum, Maya Davidovich Cohen, Ephraim Fass, Gal Zizelski Valenci, Mor Rubinstein, Efrat Rorman, Israel Nissan, Efrat Glick-Saar, Omri Nayshool, Gideon Rechavi, Ella Mendelson, Orna Mor                                                                                                                                                                                                                             |
| EPI_ISL_804218, EPI_ISL_804220, EPI_ISL_804221, EPI_ISL_804223, EPI_ISL_804229, EPI_ISL_804231, EPI_ISL_804232, EPI_ISL_804233, EPI_ISL_804234, EPI_ISL_804235, EPI_ISL_804237, EPI_ISL_804239, EPI_ISL_804240, EPI_ISL_804242, EPI_ISL_804243, EPI_ISL_804245, EPI_ISL_804256, EPI_ISL_804267, EPI_ISL_804269, EPI_ISL_804270, EPI_ISL_804271, EPI_ISL_804272, EPI_ISL_804277, EPI_ISL_804279, EPI_ISL_804280, EPI_ISL_804285, EPI_ISL_804286, EPI_ISL_804288, EPI_ISL_804290, EPI_ISL_804293, EPI_ISL_804295, EPI_ISL_804298, EPI_ISL_804302, EPI_ISL_804304, EPI_ISL_804305, EPI_ISL_804307, EPI_ISL_804308, EPI_ISL_804309, EPI_ISL_804311, EPI_ISL_804318, EPI_ISL_804321, EPI_ISL_804322, EPI_ISL_804323, EPI_ISL_804326, EPI_ISL_804327, EPI_ISL_804329, EPI_ISL_804331, EPI_ISL_804332, EPI_ISL_804335, EPI_ISL_804339, EPI_ISL_804342, EPI_ISL_804347, EPI_ISL_804351, EPI_ISL_804352, EPI_ISL_804354, EPI_ISL_804355, EPI_ISL_804360 |                                                                                                   |                                                                                                                            |                                                                                                                                                                                                                                                                                                                                                                                                                                                                                                                                                                                  |
| see above                                                                                                                                                                                                                                                                                                                                                                                                                                                                                                                                                                                                                                                                                                                                                                                                                                                                                                                                      | Respiratory Virus Unit, National Infection Service, Public Health England                         | COVID-19 Genomics UK (COG-UK) Consortium                                                                                   | PHE Covid Sequencing Team                                                                                                                                                                                                                                                                                                                                                                                                                                                                                                                                                        |
| EPI_ISL_804370, EPI_ISL_804373, EPI_ISL_804375                                                                                                                                                                                                                                                                                                                                                                                                                                                                                                                                                                                                                                                                                                                                                                                                                                                                                                 | CHU Purpan - Laboratoire de Virologie - Institut Fédératif de Biologie                            | CHU Purpan - Laboratoire de Virologie - Institut Fédératif de Biologie                                                     | Latour J., Ranger N., Dubois M., Carcenac R., Harter A., Boyer P., Tremeaux P., Izopet J.                                                                                                                                                                                                                                                                                                                                                                                                                                                                                        |
| EPI_ISL_804463, EPI_ISL_804464, EPI_ISL_804465                                                                                                                                                                                                                                                                                                                                                                                                                                                                                                                                                                                                                                                                                                                                                                                                                                                                                                 | Maryland Public Health Laboratory                                                                 | Maryland Public Health Laboratory                                                                                          | Maryland Department of Health Laboratories Administration                                                                                                                                                                                                                                                                                                                                                                                                                                                                                                                        |
| EPI_ISL_804847, EPI_ISL_804856, EPI_ISL_804857, EPI_ISL_804895, EPI_ISL_804934, EPI_ISL_804935, EPI_ISL_804936, EPI_ISL_804937, EPI_ISL_804939, EPI_ISL_804940, EPI_ISL_804941, EPI_ISL_804944                                                                                                                                                                                                                                                                                                                                                                                                                                                                                                                                                                                                                                                                                                                                                 |                                                                                                   |                                                                                                                            |                                                                                                                                                                                                                                                                                                                                                                                                                                                                                                                                                                                  |
| see above                                                                                                                                                                                                                                                                                                                                                                                                                                                                                                                                                                                                                                                                                                                                                                                                                                                                                                                                      | DC Public Health Lab/ Dept. of Forensic Sciences                                                  | DC Public Health Lab/ Dept. of Forensic Sciences                                                                           | Scott Nguyen, Elizabeth Zelaya, Connie Maza, Monica Mann, Brittany Hamilton, David Payne, Jocelyn Hauser                                                                                                                                                                                                                                                                                                                                                                                                                                                                         |
| EPI_ISL_804982, EPI_ISL_804983                                                                                                                                                                                                                                                                                                                                                                                                                                                                                                                                                                                                                                                                                                                                                                                                                                                                                                                 | BIO-REFERENCE LABORATORIES                                                                        | Wadsworth Center, New York State Department of Health                                                                      | Kirsten St. George, Daryl M. Lamson, Alexis Russel, Matthew Shudt, Melissa A Leisner, Jonathan Plitnick, Navjot Singh, John Kelly, Erasmus Schneider, Erica Lasek-Nesselquist                                                                                                                                                                                                                                                                                                                                                                                                    |
| EPI_ISL_806736, EPI_ISL_806737, EPI_ISL_806739, EPI_ISL_806741                                                                                                                                                                                                                                                                                                                                                                                                                                                                                                                                                                                                                                                                                                                                                                                                                                                                                 | SIESP DIPARTIMENTO DI PREVENZIONE TERAMO                                                          | Istituto Zooprofilattico Sperimentale dell'Abruzzo e Molise "G. Caporale"                                                  | Lorusso A, Marcacci M, Di Domenico M, Ancora M, Curini V, Mangone I, Rinaldi A, Di Pasquale A, Cammà C, Puglia I, Calistri P, Savini G                                                                                                                                                                                                                                                                                                                                                                                                                                           |
| EPI_ISL_806750, EPI_ISL_806751, EPI_ISL_806755, EPI_ISL_806757                                                                                                                                                                                                                                                                                                                                                                                                                                                                                                                                                                                                                                                                                                                                                                                                                                                                                 | SIESP DIPARTIMENTO DI PREVENZIONE SULMONA                                                         | Istituto Zooprofilattico Sperimentale dell'Abruzzo e Molise "G. Caporale"                                                  | Lorusso A, Marcacci M, Di Domenico M, Ancora M, Curini V, Mangone I, Rinaldi A, Di Pasquale A, Cammà C, Puglia I, Calistri P, Savini G                                                                                                                                                                                                                                                                                                                                                                                                                                           |
| EPI_ISL_806768, EPI_ISL_806777, EPI_ISL_806778                                                                                                                                                                                                                                                                                                                                                                                                                                                                                                                                                                                                                                                                                                                                                                                                                                                                                                 | SIESP DIPARTIMENTO DI PREVENZIONE TERAMO                                                          | Istituto Zooprofilattico Sperimentale dell'Abruzzo e Molise "G. Caporale"                                                  | Lorusso A, Marcacci M, Di Domenico M, Ancora M, Curini V, Mangone I, Rinaldi A, Di Pasquale A, Cammà C, Puglia I, Calistri P, Savini G                                                                                                                                                                                                                                                                                                                                                                                                                                           |
| EPI_ISL_806783                                                                                                                                                                                                                                                                                                                                                                                                                                                                                                                                                                                                                                                                                                                                                                                                                                                                                                                                 | Casa di cura Di Lorenzo- Avezzano                                                                 | Istituto Zooprofilattico Sperimentale dell'Abruzzo e Molise "G. Caporale"                                                  | Lorusso A, Marcacci M, Di Domenico M, Ancora M, Curini V, Mangone I, Rinaldi A, Di Pasquale A, Cammà C, Puglia I, Calistri P, Savini G                                                                                                                                                                                                                                                                                                                                                                                                                                           |
| EPI_ISL_806788                                                                                                                                                                                                                                                                                                                                                                                                                                                                                                                                                                                                                                                                                                                                                                                                                                                                                                                                 | SIESP DIPARTIMENTO DI PREVENZIONE TERAMO                                                          | Istituto Zooprofilattico Sperimentale dell'Abruzzo e Molise "G. Caporale"                                                  | Lorusso A, Marcacci M, Di Domenico M, Ancora M, Curini V, Mangone I, Rinaldi A, Di Pasquale A, Cammà C, Puglia I, Calistri P, Savini G                                                                                                                                                                                                                                                                                                                                                                                                                                           |
| EPI_ISL_806796, EPI_ISL_806798                                                                                                                                                                                                                                                                                                                                                                                                                                                                                                                                                                                                                                                                                                                                                                                                                                                                                                                 | SIESP CHIETI - DRIVE IN ORTONA                                                                    | Istituto Zooprofilattico Sperimentale dell'Abruzzo e Molise "G.                                                            | Lorusso A, Marcacci M, Di Domenico M, Ancora M, Curini V, Mangone I, Rinaldi A, Di Pasquale A, Cammà C, Puglia I, Calistri P, Savini G                                                                                                                                                                                                                                                                                                                                                                                                                                           |

|                                                                                                                                                                                                                                                                                                                                                                                                                                                                                                                                                                                                                                                                                                                                                                                                                                                                                                                                                                                                                                                                                                                                                                                                                                                                                                                                                                                                                                                                                                                                                                                                                                                                                                                                                                                                                                                                                                                                                                                                                                                                                                                                                                                                                                                                                                                                                                                                                                                                                                                                                                                                                                                                                                                                                                                                                                |                                                                                             |                                                                                                    |                                                                                                                                                                                                                                                                                                                                                                                                                                         |
|--------------------------------------------------------------------------------------------------------------------------------------------------------------------------------------------------------------------------------------------------------------------------------------------------------------------------------------------------------------------------------------------------------------------------------------------------------------------------------------------------------------------------------------------------------------------------------------------------------------------------------------------------------------------------------------------------------------------------------------------------------------------------------------------------------------------------------------------------------------------------------------------------------------------------------------------------------------------------------------------------------------------------------------------------------------------------------------------------------------------------------------------------------------------------------------------------------------------------------------------------------------------------------------------------------------------------------------------------------------------------------------------------------------------------------------------------------------------------------------------------------------------------------------------------------------------------------------------------------------------------------------------------------------------------------------------------------------------------------------------------------------------------------------------------------------------------------------------------------------------------------------------------------------------------------------------------------------------------------------------------------------------------------------------------------------------------------------------------------------------------------------------------------------------------------------------------------------------------------------------------------------------------------------------------------------------------------------------------------------------------------------------------------------------------------------------------------------------------------------------------------------------------------------------------------------------------------------------------------------------------------------------------------------------------------------------------------------------------------------------------------------------------------------------------------------------------------|---------------------------------------------------------------------------------------------|----------------------------------------------------------------------------------------------------|-----------------------------------------------------------------------------------------------------------------------------------------------------------------------------------------------------------------------------------------------------------------------------------------------------------------------------------------------------------------------------------------------------------------------------------------|
| EPI_ISL_806800                                                                                                                                                                                                                                                                                                                                                                                                                                                                                                                                                                                                                                                                                                                                                                                                                                                                                                                                                                                                                                                                                                                                                                                                                                                                                                                                                                                                                                                                                                                                                                                                                                                                                                                                                                                                                                                                                                                                                                                                                                                                                                                                                                                                                                                                                                                                                                                                                                                                                                                                                                                                                                                                                                                                                                                                                 | SIESP CHIETI - DRIVE IN GISSI                                                               | Caporale"<br>Istituto Zooprofilattico Sperimentale dell'Abruzzo e Molise "G. Caporale"             | Lorusso A, Marcacci M, Di Domenico M, Ancora M, Curini V, Mangone I, Rinaldi A, Di Pasquale A, Cammà C, Puglia I, Calistri P, Savini G                                                                                                                                                                                                                                                                                                  |
| EPI_ISL_807154, EPI_ISL_807155, EPI_ISL_807156                                                                                                                                                                                                                                                                                                                                                                                                                                                                                                                                                                                                                                                                                                                                                                                                                                                                                                                                                                                                                                                                                                                                                                                                                                                                                                                                                                                                                                                                                                                                                                                                                                                                                                                                                                                                                                                                                                                                                                                                                                                                                                                                                                                                                                                                                                                                                                                                                                                                                                                                                                                                                                                                                                                                                                                 | Deva County Emergency Hospital                                                              | National Institute of Infectious Diseases-Prof. Dr. Matei Bals<br>Molecular Diagnostics Laboratory | Leontina Banica, Marius Surleac, Corina Casangiu, Petre Milu, Andreea Tudor, Simona Paraschiv, Dan Otelea                                                                                                                                                                                                                                                                                                                               |
| EPI_ISL_811041, EPI_ISL_811046, EPI_ISL_811051, EPI_ISL_811062, EPI_ISL_811065, EPI_ISL_811071, EPI_ISL_811077, EPI_ISL_811081, EPI_ISL_811082, EPI_ISL_811083, EPI_ISL_811084, EPI_ISL_811086, EPI_ISL_811087, EPI_ISL_811091, EPI_ISL_811094, EPI_ISL_811096, EPI_ISL_811098, EPI_ISL_811099, EPI_ISL_811101, EPI_ISL_811102, EPI_ISL_811105, EPI_ISL_811115, EPI_ISL_811119, EPI_ISL_811120                                                                                                                                                                                                                                                                                                                                                                                                                                                                                                                                                                                                                                                                                                                                                                                                                                                                                                                                                                                                                                                                                                                                                                                                                                                                                                                                                                                                                                                                                                                                                                                                                                                                                                                                                                                                                                                                                                                                                                                                                                                                                                                                                                                                                                                                                                                                                                                                                                 | Respiratory Virus Unit, National Infection Service, Public Health England                   | COVID-19 Genomics UK (COG-UK) Consortium                                                           | PHE Covid Sequencing Team                                                                                                                                                                                                                                                                                                                                                                                                               |
| see above                                                                                                                                                                                                                                                                                                                                                                                                                                                                                                                                                                                                                                                                                                                                                                                                                                                                                                                                                                                                                                                                                                                                                                                                                                                                                                                                                                                                                                                                                                                                                                                                                                                                                                                                                                                                                                                                                                                                                                                                                                                                                                                                                                                                                                                                                                                                                                                                                                                                                                                                                                                                                                                                                                                                                                                                                      |                                                                                             |                                                                                                    |                                                                                                                                                                                                                                                                                                                                                                                                                                         |
| EPI_ISL_811139                                                                                                                                                                                                                                                                                                                                                                                                                                                                                                                                                                                                                                                                                                                                                                                                                                                                                                                                                                                                                                                                                                                                                                                                                                                                                                                                                                                                                                                                                                                                                                                                                                                                                                                                                                                                                                                                                                                                                                                                                                                                                                                                                                                                                                                                                                                                                                                                                                                                                                                                                                                                                                                                                                                                                                                                                 | Ministry of Health Turkey                                                                   | Ministry of Health Turkey                                                                          | Fatma Bayrakdar, Yasemin Cogun, Süleyman Yalcin, Aye Baak Alta, Gülay Korukluolu                                                                                                                                                                                                                                                                                                                                                        |
| EPI_ISL_811236, EPI_ISL_811241, EPI_ISL_811247, EPI_ISL_811275, EPI_ISL_811293, EPI_ISL_811310, EPI_ISL_811312, EPI_ISL_811321, EPI_ISL_811345, EPI_ISL_811350, EPI_ISL_811353, EPI_ISL_811377, EPI_ISL_811414, EPI_ISL_811472, EPI_ISL_811516, EPI_ISL_811519, EPI_ISL_811530, EPI_ISL_811563, EPI_ISL_811573, EPI_ISL_811580, EPI_ISL_811617, EPI_ISL_811618, EPI_ISL_811620, EPI_ISL_811627, EPI_ISL_811645, EPI_ISL_811650, EPI_ISL_811661, EPI_ISL_811669, EPI_ISL_811677, EPI_ISL_811678, EPI_ISL_811682, EPI_ISL_811688                                                                                                                                                                                                                                                                                                                                                                                                                                                                                                                                                                                                                                                                                                                                                                                                                                                                                                                                                                                                                                                                                                                                                                                                                                                                                                                                                                                                                                                                                                                                                                                                                                                                                                                                                                                                                                                                                                                                                                                                                                                                                                                                                                                                                                                                                                 | Lighthouse Lab in Milton Keynes                                                             | Wellcome Sanger Institute for the COVID-19 Genomics UK (COG-UK) Consortium                         | The Lighthouse Lab in Milton Keynes and Alex Alderton, Roberto Amato, Sonia Goncalves, Ewan Harrison, David K. Jackson, Ian Johnston, Dominic Kwiatkowski, Cordelia Langford, John Sillitoe on behalf of the Wellcome Sanger Institute COVID-19 Surveillance Team                                                                                                                                                                       |
| see above                                                                                                                                                                                                                                                                                                                                                                                                                                                                                                                                                                                                                                                                                                                                                                                                                                                                                                                                                                                                                                                                                                                                                                                                                                                                                                                                                                                                                                                                                                                                                                                                                                                                                                                                                                                                                                                                                                                                                                                                                                                                                                                                                                                                                                                                                                                                                                                                                                                                                                                                                                                                                                                                                                                                                                                                                      |                                                                                             |                                                                                                    |                                                                                                                                                                                                                                                                                                                                                                                                                                         |
| EPI_ISL_811713                                                                                                                                                                                                                                                                                                                                                                                                                                                                                                                                                                                                                                                                                                                                                                                                                                                                                                                                                                                                                                                                                                                                                                                                                                                                                                                                                                                                                                                                                                                                                                                                                                                                                                                                                                                                                                                                                                                                                                                                                                                                                                                                                                                                                                                                                                                                                                                                                                                                                                                                                                                                                                                                                                                                                                                                                 | Lighthouse Lab in Cambridge                                                                 | Wellcome Sanger Institute for the COVID-19 Genomics UK (COG-UK) Consortium                         | Rob Howes, The Lighthouse Lab in Cambridge and Alex Alderton, Roberto Amato, Sonia Goncalves, Ewan Harrison, David K. Jackson, Ian Johnston, Dominic Kwiatkowski, Cordelia Langford, John Sillitoe on behalf of the Wellcome Sanger Institute COVID-19 Surveillance Team                                                                                                                                                                |
| EPI_ISL_811720, EPI_ISL_811750, EPI_ISL_811753, EPI_ISL_811756, EPI_ISL_811767, EPI_ISL_811785, EPI_ISL_811808, EPI_ISL_811811, EPI_ISL_811812, EPI_ISL_811813, EPI_ISL_811815, EPI_ISL_811817, EPI_ISL_811818, EPI_ISL_811820, EPI_ISL_811821, EPI_ISL_811822, EPI_ISL_811823, EPI_ISL_811824, EPI_ISL_811828, EPI_ISL_811829, EPI_ISL_811831, EPI_ISL_811833, EPI_ISL_811835, EPI_ISL_811838, EPI_ISL_811839, EPI_ISL_811843, EPI_ISL_811844, EPI_ISL_811846, EPI_ISL_811847, EPI_ISL_811848, EPI_ISL_811851, EPI_ISL_811857, EPI_ISL_811858, EPI_ISL_811860, EPI_ISL_811861, EPI_ISL_811866, EPI_ISL_811867, EPI_ISL_811869, EPI_ISL_811871, EPI_ISL_811875, EPI_ISL_811876, EPI_ISL_811878, EPI_ISL_811879, EPI_ISL_811881, EPI_ISL_811883, EPI_ISL_811887, EPI_ISL_811891, EPI_ISL_811897, EPI_ISL_811898, EPI_ISL_811903, EPI_ISL_811904, EPI_ISL_811905, EPI_ISL_811908, EPI_ISL_811909, EPI_ISL_811910, EPI_ISL_811913, EPI_ISL_811914, EPI_ISL_811915, EPI_ISL_811916, EPI_ISL_811918, EPI_ISL_811919, EPI_ISL_811920, EPI_ISL_811921, EPI_ISL_811923, EPI_ISL_811925, EPI_ISL_811926, EPI_ISL_811927, EPI_ISL_811928, EPI_ISL_811929, EPI_ISL_811930, EPI_ISL_811931, EPI_ISL_811932, EPI_ISL_811936, EPI_ISL_811937, EPI_ISL_811939, EPI_ISL_811940, EPI_ISL_811942, EPI_ISL_811945, EPI_ISL_811947, EPI_ISL_811950, EPI_ISL_811951, EPI_ISL_811952, EPI_ISL_811953, EPI_ISL_811954, EPI_ISL_811955, EPI_ISL_811956, EPI_ISL_811961, EPI_ISL_811962, EPI_ISL_811963, EPI_ISL_811964, EPI_ISL_811965, EPI_ISL_811966, EPI_ISL_811967, EPI_ISL_811971, EPI_ISL_811972, EPI_ISL_811973, EPI_ISL_811974, EPI_ISL_811975, EPI_ISL_811976, EPI_ISL_811978, EPI_ISL_811979, EPI_ISL_811980, EPI_ISL_811982, EPI_ISL_811986, EPI_ISL_811987, EPI_ISL_811988, EPI_ISL_811989, EPI_ISL_811990, EPI_ISL_811992, EPI_ISL_811993, EPI_ISL_811995, EPI_ISL_811996, EPI_ISL_811999, EPI_ISL_812002, EPI_ISL_812003, EPI_ISL_812005, EPI_ISL_812006, EPI_ISL_812008, EPI_ISL_812011, EPI_ISL_812012, EPI_ISL_812015, EPI_ISL_812017, EPI_ISL_812020, EPI_ISL_812021, EPI_ISL_812022, EPI_ISL_812023, EPI_ISL_812024, EPI_ISL_812026, EPI_ISL_812029, EPI_ISL_812032, EPI_ISL_812033, EPI_ISL_812034, EPI_ISL_812036, EPI_ISL_812039, EPI_ISL_812041, EPI_ISL_812044, EPI_ISL_812047, EPI_ISL_812049, EPI_ISL_812053, EPI_ISL_812057, EPI_ISL_812059, EPI_ISL_812062, EPI_ISL_812065, EPI_ISL_812068, EPI_ISL_812071, EPI_ISL_812073, EPI_ISL_812074, EPI_ISL_812078, EPI_ISL_812079, EPI_ISL_812082, EPI_ISL_812084, EPI_ISL_812085, EPI_ISL_812086, EPI_ISL_812087, EPI_ISL_812091, EPI_ISL_812092, EPI_ISL_812094, EPI_ISL_812095, EPI_ISL_812096, EPI_ISL_812098, EPI_ISL_812099, EPI_ISL_812101, EPI_ISL_812102, EPI_ISL_812104, EPI_ISL_812105, EPI_ISL_812109, EPI_ISL_812110, EPI_ISL_812111, EPI_ISL_812112, EPI_ISL_812113 | Lighthouse Lab in Milton Keynes                                                             | Wellcome Sanger Institute for the COVID-19 Genomics UK (COG-UK) Consortium                         | The Lighthouse Lab in Milton Keynes and Alex Alderton, Roberto Amato, Sonia Goncalves, Ewan Harrison, David K. Jackson, Ian Johnston, Dominic Kwiatkowski, Cordelia Langford, John Sillitoe on behalf of the Wellcome Sanger Institute COVID-19 Surveillance Team                                                                                                                                                                       |
| see above                                                                                                                                                                                                                                                                                                                                                                                                                                                                                                                                                                                                                                                                                                                                                                                                                                                                                                                                                                                                                                                                                                                                                                                                                                                                                                                                                                                                                                                                                                                                                                                                                                                                                                                                                                                                                                                                                                                                                                                                                                                                                                                                                                                                                                                                                                                                                                                                                                                                                                                                                                                                                                                                                                                                                                                                                      |                                                                                             |                                                                                                    |                                                                                                                                                                                                                                                                                                                                                                                                                                         |
| EPI_ISL_812298, EPI_ISL_812299, EPI_ISL_812303                                                                                                                                                                                                                                                                                                                                                                                                                                                                                                                                                                                                                                                                                                                                                                                                                                                                                                                                                                                                                                                                                                                                                                                                                                                                                                                                                                                                                                                                                                                                                                                                                                                                                                                                                                                                                                                                                                                                                                                                                                                                                                                                                                                                                                                                                                                                                                                                                                                                                                                                                                                                                                                                                                                                                                                 | Delaware Public Health Lab                                                                  | Delaware Public Health Lab                                                                         | Gregory Hovan                                                                                                                                                                                                                                                                                                                                                                                                                           |
| EPI_ISL_812348                                                                                                                                                                                                                                                                                                                                                                                                                                                                                                                                                                                                                                                                                                                                                                                                                                                                                                                                                                                                                                                                                                                                                                                                                                                                                                                                                                                                                                                                                                                                                                                                                                                                                                                                                                                                                                                                                                                                                                                                                                                                                                                                                                                                                                                                                                                                                                                                                                                                                                                                                                                                                                                                                                                                                                                                                 | University of Wisconsin-Madison AIDS Vaccine Research Laboratories                          | University of Wisconsin-Madison AIDS Vaccine Research Laboratories                                 | Gage Moreno, Katarina Braun, et al. AIDS Vaccine Research Laboratories                                                                                                                                                                                                                                                                                                                                                                  |
| EPI_ISL_812424, EPI_ISL_812426, EPI_ISL_812427, EPI_ISL_812428, EPI_ISL_812429, EPI_ISL_812430, EPI_ISL_812433                                                                                                                                                                                                                                                                                                                                                                                                                                                                                                                                                                                                                                                                                                                                                                                                                                                                                                                                                                                                                                                                                                                                                                                                                                                                                                                                                                                                                                                                                                                                                                                                                                                                                                                                                                                                                                                                                                                                                                                                                                                                                                                                                                                                                                                                                                                                                                                                                                                                                                                                                                                                                                                                                                                 | Microbiological Diagnostic Unit - Public Health Laboratory (MDU-PHL)                        | MDU-PHL                                                                                            | Seemann T., Sait, M.L., Sherry, N.L.                                                                                                                                                                                                                                                                                                                                                                                                    |
| EPI_ISL_812437                                                                                                                                                                                                                                                                                                                                                                                                                                                                                                                                                                                                                                                                                                                                                                                                                                                                                                                                                                                                                                                                                                                                                                                                                                                                                                                                                                                                                                                                                                                                                                                                                                                                                                                                                                                                                                                                                                                                                                                                                                                                                                                                                                                                                                                                                                                                                                                                                                                                                                                                                                                                                                                                                                                                                                                                                 | Victorian Infectious Diseases Reference Laboratory (VIDRL)                                  | VIDRL and MDU-PHL                                                                                  | Caly L., Seemann T., Sait, M.L., Druce J., Sherry, N.L.                                                                                                                                                                                                                                                                                                                                                                                 |
| EPI_ISL_812443, EPI_ISL_812444, EPI_ISL_812445, EPI_ISL_812446, EPI_ISL_812448, EPI_ISL_812449, EPI_ISL_812450, EPI_ISL_812451, EPI_ISL_812452, EPI_ISL_812453, EPI_ISL_812454, EPI_ISL_812455, EPI_ISL_812456, EPI_ISL_812457, EPI_ISL_812458, EPI_ISL_812460, EPI_ISL_812461, EPI_ISL_812462, EPI_ISL_812463, EPI_ISL_812464, EPI_ISL_812465, EPI_ISL_812466, EPI_ISL_812467, EPI_ISL_812468, EPI_ISL_812469, EPI_ISL_812470, EPI_ISL_812471, EPI_ISL_812472, EPI_ISL_812473, EPI_ISL_812474, EPI_ISL_812475, EPI_ISL_812477, EPI_ISL_812478, EPI_ISL_812479, EPI_ISL_812482, EPI_ISL_812483, EPI_ISL_812484, EPI_ISL_812491, EPI_ISL_812495, EPI_ISL_812496, EPI_ISL_812497, EPI_ISL_812498, EPI_ISL_812499, EPI_ISL_812500, EPI_ISL_812501, EPI_ISL_812503, EPI_ISL_812504, EPI_ISL_812506, EPI_ISL_812509, EPI_ISL_812510, EPI_ISL_812511, EPI_ISL_812512, EPI_ISL_812513, EPI_ISL_812514, EPI_ISL_812515, EPI_ISL_812516, EPI_ISL_812517, EPI_ISL_812712, EPI_ISL_812714, EPI_ISL_812715, EPI_ISL_812717, EPI_ISL_812719, EPI_ISL_812720, EPI_ISL_812721                                                                                                                                                                                                                                                                                                                                                                                                                                                                                                                                                                                                                                                                                                                                                                                                                                                                                                                                                                                                                                                                                                                                                                                                                                                                                                                                                                                                                                                                                                                                                                                                                                                                                                                                                                 | Laboratorio de Referencia Nacional de Virus Respiratorios, Instituto Nacional de Salud Peru | Laboratorio de Genómica Microbiana, Universidad Peruana Cayetano Heredia                           | Pablo Tsukayama, Alejandra Dávila-Barclay, Guillermo Salvatierra, Luis González, Pedro E. Romero, Brenda Ayzanoa, Janet Huancachoque, Pool Marcos, Camila Castillo-Vilcahuamán, Oscar Escalante, Priscila Lope, Nancy Rojas                                                                                                                                                                                                             |
| see above                                                                                                                                                                                                                                                                                                                                                                                                                                                                                                                                                                                                                                                                                                                                                                                                                                                                                                                                                                                                                                                                                                                                                                                                                                                                                                                                                                                                                                                                                                                                                                                                                                                                                                                                                                                                                                                                                                                                                                                                                                                                                                                                                                                                                                                                                                                                                                                                                                                                                                                                                                                                                                                                                                                                                                                                                      |                                                                                             |                                                                                                    |                                                                                                                                                                                                                                                                                                                                                                                                                                         |
| EPI_ISL_812728                                                                                                                                                                                                                                                                                                                                                                                                                                                                                                                                                                                                                                                                                                                                                                                                                                                                                                                                                                                                                                                                                                                                                                                                                                                                                                                                                                                                                                                                                                                                                                                                                                                                                                                                                                                                                                                                                                                                                                                                                                                                                                                                                                                                                                                                                                                                                                                                                                                                                                                                                                                                                                                                                                                                                                                                                 | DOHMH Riverside                                                                             | New York City Public Health Laboratory                                                             | Jade Wang, et al.                                                                                                                                                                                                                                                                                                                                                                                                                       |
| EPI_ISL_812730                                                                                                                                                                                                                                                                                                                                                                                                                                                                                                                                                                                                                                                                                                                                                                                                                                                                                                                                                                                                                                                                                                                                                                                                                                                                                                                                                                                                                                                                                                                                                                                                                                                                                                                                                                                                                                                                                                                                                                                                                                                                                                                                                                                                                                                                                                                                                                                                                                                                                                                                                                                                                                                                                                                                                                                                                 | DOHMH Crown Heights                                                                         | New York City Public Health Laboratory                                                             | Jade Wang, et al.                                                                                                                                                                                                                                                                                                                                                                                                                       |
| EPI_ISL_812731                                                                                                                                                                                                                                                                                                                                                                                                                                                                                                                                                                                                                                                                                                                                                                                                                                                                                                                                                                                                                                                                                                                                                                                                                                                                                                                                                                                                                                                                                                                                                                                                                                                                                                                                                                                                                                                                                                                                                                                                                                                                                                                                                                                                                                                                                                                                                                                                                                                                                                                                                                                                                                                                                                                                                                                                                 | DOHMH Jamaica                                                                               | New York City Public Health Laboratory                                                             | Jade Wang, et al.                                                                                                                                                                                                                                                                                                                                                                                                                       |
| EPI_ISL_812732                                                                                                                                                                                                                                                                                                                                                                                                                                                                                                                                                                                                                                                                                                                                                                                                                                                                                                                                                                                                                                                                                                                                                                                                                                                                                                                                                                                                                                                                                                                                                                                                                                                                                                                                                                                                                                                                                                                                                                                                                                                                                                                                                                                                                                                                                                                                                                                                                                                                                                                                                                                                                                                                                                                                                                                                                 | DOHMH Corona                                                                                | New York City Public Health Laboratory                                                             | Jade Wang, et al.                                                                                                                                                                                                                                                                                                                                                                                                                       |
| EPI_ISL_812734, EPI_ISL_812738                                                                                                                                                                                                                                                                                                                                                                                                                                                                                                                                                                                                                                                                                                                                                                                                                                                                                                                                                                                                                                                                                                                                                                                                                                                                                                                                                                                                                                                                                                                                                                                                                                                                                                                                                                                                                                                                                                                                                                                                                                                                                                                                                                                                                                                                                                                                                                                                                                                                                                                                                                                                                                                                                                                                                                                                 | DOHMH Crown Heights                                                                         | New York City Public Health Laboratory                                                             | Jade Wang, et al.                                                                                                                                                                                                                                                                                                                                                                                                                       |
| EPI_ISL_812739                                                                                                                                                                                                                                                                                                                                                                                                                                                                                                                                                                                                                                                                                                                                                                                                                                                                                                                                                                                                                                                                                                                                                                                                                                                                                                                                                                                                                                                                                                                                                                                                                                                                                                                                                                                                                                                                                                                                                                                                                                                                                                                                                                                                                                                                                                                                                                                                                                                                                                                                                                                                                                                                                                                                                                                                                 | DOHMH Central Harlem                                                                        | New York City Public Health Laboratory                                                             | Jade Wang, et al.                                                                                                                                                                                                                                                                                                                                                                                                                       |
| EPI_ISL_812743, EPI_ISL_812744                                                                                                                                                                                                                                                                                                                                                                                                                                                                                                                                                                                                                                                                                                                                                                                                                                                                                                                                                                                                                                                                                                                                                                                                                                                                                                                                                                                                                                                                                                                                                                                                                                                                                                                                                                                                                                                                                                                                                                                                                                                                                                                                                                                                                                                                                                                                                                                                                                                                                                                                                                                                                                                                                                                                                                                                 | DOHMH Corona                                                                                | New York City Public Health Laboratory                                                             | Jade Wang, et al.                                                                                                                                                                                                                                                                                                                                                                                                                       |
| EPI_ISL_812745                                                                                                                                                                                                                                                                                                                                                                                                                                                                                                                                                                                                                                                                                                                                                                                                                                                                                                                                                                                                                                                                                                                                                                                                                                                                                                                                                                                                                                                                                                                                                                                                                                                                                                                                                                                                                                                                                                                                                                                                                                                                                                                                                                                                                                                                                                                                                                                                                                                                                                                                                                                                                                                                                                                                                                                                                 | DOHMH Riverside                                                                             | New York City Public Health Laboratory                                                             | Jade Wang, et al.                                                                                                                                                                                                                                                                                                                                                                                                                       |
| EPI_ISL_812748                                                                                                                                                                                                                                                                                                                                                                                                                                                                                                                                                                                                                                                                                                                                                                                                                                                                                                                                                                                                                                                                                                                                                                                                                                                                                                                                                                                                                                                                                                                                                                                                                                                                                                                                                                                                                                                                                                                                                                                                                                                                                                                                                                                                                                                                                                                                                                                                                                                                                                                                                                                                                                                                                                                                                                                                                 | DOHMH Corona                                                                                | New York City Public Health Laboratory                                                             | Jade Wang, et al.                                                                                                                                                                                                                                                                                                                                                                                                                       |
| EPI_ISL_812749                                                                                                                                                                                                                                                                                                                                                                                                                                                                                                                                                                                                                                                                                                                                                                                                                                                                                                                                                                                                                                                                                                                                                                                                                                                                                                                                                                                                                                                                                                                                                                                                                                                                                                                                                                                                                                                                                                                                                                                                                                                                                                                                                                                                                                                                                                                                                                                                                                                                                                                                                                                                                                                                                                                                                                                                                 | DOHMH Central Harlem                                                                        | New York City Public Health Laboratory                                                             | Jade Wang, et al.                                                                                                                                                                                                                                                                                                                                                                                                                       |
| EPI_ISL_812750, EPI_ISL_812751                                                                                                                                                                                                                                                                                                                                                                                                                                                                                                                                                                                                                                                                                                                                                                                                                                                                                                                                                                                                                                                                                                                                                                                                                                                                                                                                                                                                                                                                                                                                                                                                                                                                                                                                                                                                                                                                                                                                                                                                                                                                                                                                                                                                                                                                                                                                                                                                                                                                                                                                                                                                                                                                                                                                                                                                 | DOHMH Corona                                                                                | New York City Public Health Laboratory                                                             | Jade Wang, et al.                                                                                                                                                                                                                                                                                                                                                                                                                       |
| EPI_ISL_812753, EPI_ISL_812754, EPI_ISL_812755, EPI_ISL_812757                                                                                                                                                                                                                                                                                                                                                                                                                                                                                                                                                                                                                                                                                                                                                                                                                                                                                                                                                                                                                                                                                                                                                                                                                                                                                                                                                                                                                                                                                                                                                                                                                                                                                                                                                                                                                                                                                                                                                                                                                                                                                                                                                                                                                                                                                                                                                                                                                                                                                                                                                                                                                                                                                                                                                                 | DOHMH Morrisania                                                                            | New York City Public Health Laboratory                                                             | Jade Wang, et al.                                                                                                                                                                                                                                                                                                                                                                                                                       |
| EPI_ISL_812760                                                                                                                                                                                                                                                                                                                                                                                                                                                                                                                                                                                                                                                                                                                                                                                                                                                                                                                                                                                                                                                                                                                                                                                                                                                                                                                                                                                                                                                                                                                                                                                                                                                                                                                                                                                                                                                                                                                                                                                                                                                                                                                                                                                                                                                                                                                                                                                                                                                                                                                                                                                                                                                                                                                                                                                                                 | DOHMH Corona                                                                                | New York City Public Health Laboratory                                                             | Jade Wang, et al.                                                                                                                                                                                                                                                                                                                                                                                                                       |
| EPI_ISL_812763, EPI_ISL_812764, EPI_ISL_812780, EPI_ISL_812875, EPI_ISL_812880, EPI_ISL_812888, EPI_ISL_812913, EPI_ISL_812917                                                                                                                                                                                                                                                                                                                                                                                                                                                                                                                                                                                                                                                                                                                                                                                                                                                                                                                                                                                                                                                                                                                                                                                                                                                                                                                                                                                                                                                                                                                                                                                                                                                                                                                                                                                                                                                                                                                                                                                                                                                                                                                                                                                                                                                                                                                                                                                                                                                                                                                                                                                                                                                                                                 | Ministry of Health Turkey                                                                   | Ministry of Health Turkey                                                                          | Fatma Bayrakdar, Yasemin Cogun, Süleyman Yalcin, Aye Baak Alta, Gülay Korukluolu                                                                                                                                                                                                                                                                                                                                                        |
| EPI_ISL_812922                                                                                                                                                                                                                                                                                                                                                                                                                                                                                                                                                                                                                                                                                                                                                                                                                                                                                                                                                                                                                                                                                                                                                                                                                                                                                                                                                                                                                                                                                                                                                                                                                                                                                                                                                                                                                                                                                                                                                                                                                                                                                                                                                                                                                                                                                                                                                                                                                                                                                                                                                                                                                                                                                                                                                                                                                 | Pasteur Institute in Ho Chi Minh city                                                       | Department of Microbiology and Immunology - Pasteur Institute in Ho Chi Minh city                  | Manh Huy Dao, Hang Thi Thu Pham, Nhung Pham Hong Vu, Hieu Minh Le, Thang Minh Cao, Loan Thi Kim Huynh, Long Thanh Nguyen, Anh Hoang Nguyen, Hieu Trung Nguyen, Thao Thi Ngoc Nguyen, Thinh Viet Nguyen, Quang Duy Pham, Quang Chan Luong, Lan Trong Phan, Thuong Vu Nguyen.                                                                                                                                                             |
| EPI_ISL_813031, EPI_ISL_813033, EPI_ISL_813034, EPI_ISL_813035, EPI_ISL_813036, EPI_ISL_813039, EPI_ISL_813040, EPI_ISL_813042, EPI_ISL_813044, EPI_ISL_813063, EPI_ISL_813065, EPI_ISL_813067, EPI_ISL_813073, EPI_ISL_813074, EPI_ISL_813076, EPI_ISL_813077, EPI_ISL_813082, EPI_ISL_813083, EPI_ISL_813085, EPI_ISL_813093, EPI_ISL_813094, EPI_ISL_813108, EPI_ISL_813111, EPI_ISL_813116, EPI_ISL_813120, EPI_ISL_813123, EPI_ISL_813136, EPI_ISL_813138, EPI_ISL_813144, EPI_ISL_813147, EPI_ISL_813149                                                                                                                                                                                                                                                                                                                                                                                                                                                                                                                                                                                                                                                                                                                                                                                                                                                                                                                                                                                                                                                                                                                                                                                                                                                                                                                                                                                                                                                                                                                                                                                                                                                                                                                                                                                                                                                                                                                                                                                                                                                                                                                                                                                                                                                                                                                 | University of Birmingham                                                                    | COVID-19 Genomics UK (COG-UK) Consortium                                                           | Institute of Microbiology, University of Birmingham: Claire McMurray, Joanne Stockton, Samuel Nicholls, Radoslaw Poplawski, Will Rowe, Josh Quick, Nicholas Loman. University of Birmingham Testing Laboratory: Celina M Whalley, Andrew Bosworth, Charlotte Poxon, Kasun Wanigasooriya, Oliver Pickles, Mike Kidd, Alex Richter, Andrew D Beggs PHE Heartlands Lab: Husam Osman, Andrew Bosworth. Queen Elizabeth Hospital: Anna Casey |
| see above                                                                                                                                                                                                                                                                                                                                                                                                                                                                                                                                                                                                                                                                                                                                                                                                                                                                                                                                                                                                                                                                                                                                                                                                                                                                                                                                                                                                                                                                                                                                                                                                                                                                                                                                                                                                                                                                                                                                                                                                                                                                                                                                                                                                                                                                                                                                                                                                                                                                                                                                                                                                                                                                                                                                                                                                                      |                                                                                             |                                                                                                    |                                                                                                                                                                                                                                                                                                                                                                                                                                         |
| EPI_ISL_813167, EPI_ISL_813171, EPI_ISL_813177, EPI_ISL_813185, EPI_ISL_813186, EPI_ISL_813191, EPI_ISL_813192, EPI_ISL_813193, EPI_ISL_813198, EPI_ISL_813204, EPI_ISL_813206, EPI_ISL_813214, EPI_ISL_813216, EPI_ISL_813219, EPI_ISL_813221, EPI_ISL_813224, EPI_ISL_813226, EPI_ISL_813227, EPI_ISL_813231, EPI_ISL_813237, EPI_ISL_813239, EPI_ISL_813240, EPI_ISL_813245, EPI_ISL_813246, EPI_ISL_813254, EPI_ISL_813255, EPI_ISL_813257, EPI_ISL_813262, EPI_ISL_813264, EPI_ISL_813267, EPI_ISL_813272, EPI_ISL_813276, EPI_ISL_813285, EPI_ISL_813286, EPI_ISL_813287, EPI_ISL_813288, EPI_ISL_813289, EPI_ISL_813290, EPI_ISL_813292, EPI_ISL_813294, EPI_ISL_813297, EPI_ISL_813301, EPI_ISL_813307, EPI_ISL_813310, EPI_ISL_813313, EPI_ISL_813316, EPI_ISL_813319, EPI_ISL_813320, EPI_ISL_813324, EPI_ISL_813329, EPI_ISL_813335, EPI_ISL_813340, EPI_ISL_813343,                                                                                                                                                                                                                                                                                                                                                                                                                                                                                                                                                                                                                                                                                                                                                                                                                                                                                                                                                                                                                                                                                                                                                                                                                                                                                                                                                                                                                                                                                                                                                                                                                                                                                                                                                                                                                                                                                                                                                |                                                                                             |                                                                                                    |                                                                                                                                                                                                                                                                                                                                                                                                                                         |

|                                                                                                                                                                                                                                                                                                                                                                                                                                                                                                                                                                                                                                                                                                                                                                                                                                                                                                                                                                                                                                                                                                                                                |                                                                                                                                                                                                 |                                                              |                                                                                                                                                                                                                                                                                                                                                                                                                                                                                                                                                                                                                                                                                         |
|------------------------------------------------------------------------------------------------------------------------------------------------------------------------------------------------------------------------------------------------------------------------------------------------------------------------------------------------------------------------------------------------------------------------------------------------------------------------------------------------------------------------------------------------------------------------------------------------------------------------------------------------------------------------------------------------------------------------------------------------------------------------------------------------------------------------------------------------------------------------------------------------------------------------------------------------------------------------------------------------------------------------------------------------------------------------------------------------------------------------------------------------|-------------------------------------------------------------------------------------------------------------------------------------------------------------------------------------------------|--------------------------------------------------------------|-----------------------------------------------------------------------------------------------------------------------------------------------------------------------------------------------------------------------------------------------------------------------------------------------------------------------------------------------------------------------------------------------------------------------------------------------------------------------------------------------------------------------------------------------------------------------------------------------------------------------------------------------------------------------------------------|
| EPI_ISL_813345, EPI_ISL_813349                                                                                                                                                                                                                                                                                                                                                                                                                                                                                                                                                                                                                                                                                                                                                                                                                                                                                                                                                                                                                                                                                                                 |                                                                                                                                                                                                 |                                                              |                                                                                                                                                                                                                                                                                                                                                                                                                                                                                                                                                                                                                                                                                         |
| see above                                                                                                                                                                                                                                                                                                                                                                                                                                                                                                                                                                                                                                                                                                                                                                                                                                                                                                                                                                                                                                                                                                                                      | Department of Pathology, University of Cambridge                                                                                                                                                | COVID-19 Genomics UK (COG-UK) Consortium                     | Aminu S. Jahun, Yasmin Chaudhry, Grant Hall, Iliana Georgana, Myra Hosmillo, Martin D. Curran, Malte Pinckert, Surendra Parmar, Ian Goodfellow                                                                                                                                                                                                                                                                                                                                                                                                                                                                                                                                          |
| EPI_ISL_813357, EPI_ISL_813359, EPI_ISL_813365, EPI_ISL_813367, EPI_ISL_813368, EPI_ISL_813369, EPI_ISL_813370, EPI_ISL_813371, EPI_ISL_813382, EPI_ISL_813387, EPI_ISL_813388, EPI_ISL_813405, EPI_ISL_813409, EPI_ISL_813414, EPI_ISL_813417, EPI_ISL_813419, EPI_ISL_813421, EPI_ISL_813425, EPI_ISL_813426, EPI_ISL_813427, EPI_ISL_813430, EPI_ISL_813434, EPI_ISL_813442, EPI_ISL_813451, EPI_ISL_813455, EPI_ISL_813456, EPI_ISL_813458, EPI_ISL_813459, EPI_ISL_813462, EPI_ISL_813467, EPI_ISL_813471, EPI_ISL_813472, EPI_ISL_813476, EPI_ISL_813480, EPI_ISL_813491, EPI_ISL_813494, EPI_ISL_813495, EPI_ISL_813497, EPI_ISL_813498, EPI_ISL_813503, EPI_ISL_813509, EPI_ISL_813511, EPI_ISL_813512, EPI_ISL_813514, EPI_ISL_813517, EPI_ISL_813521, EPI_ISL_813523, EPI_ISL_813528, EPI_ISL_813532, EPI_ISL_813561, EPI_ISL_813564, EPI_ISL_813588, EPI_ISL_813594, EPI_ISL_813603, EPI_ISL_813604, EPI_ISL_813609, EPI_ISL_813612, EPI_ISL_813618, EPI_ISL_813620, EPI_ISL_813622, EPI_ISL_813629, EPI_ISL_813630, EPI_ISL_813632, EPI_ISL_813633, EPI_ISL_813643, EPI_ISL_813644, EPI_ISL_813646, EPI_ISL_813648, EPI_ISL_813651 | University of Exeter                                                                                                                                                                            | COVID-19 Genomics UK (COG-UK) Consortium                     | Ben Temperton, Aaron Jeffries, Michelle Michelsen, Joanna Warwick-Dugdale, Audrey Farbos, Robyn Manley, Stephen Michell, Jane Masoli                                                                                                                                                                                                                                                                                                                                                                                                                                                                                                                                                    |
| EPI_ISL_813656                                                                                                                                                                                                                                                                                                                                                                                                                                                                                                                                                                                                                                                                                                                                                                                                                                                                                                                                                                                                                                                                                                                                 | Kettering General Hospital                                                                                                                                                                      | COVID-19 Genomics UK (COG-UK) Consortium                     | Patrick McClure, Joseph Chappell, Theocharis Tsoileridis, Jonathan Ball, Nadine Holmes, Matthew Carlisle, Christopher Moore, Fei Sang, Johnny Debebe, Victoria Wright, Matthew Loose                                                                                                                                                                                                                                                                                                                                                                                                                                                                                                    |
| EPI_ISL_813682, EPI_ISL_813686, EPI_ISL_813692, EPI_ISL_813693, EPI_ISL_813694, EPI_ISL_813699                                                                                                                                                                                                                                                                                                                                                                                                                                                                                                                                                                                                                                                                                                                                                                                                                                                                                                                                                                                                                                                 | Liverpool Clinical Laboratories                                                                                                                                                                 | COVID-19 Genomics UK (COG-UK) Consortium                     | Sam Haldenby, Anita Lucaci, Steve Paterson, Julian Hiscox, Alistair Darby, M Almsaud, A Alrezaihi, Muhannad Alruwaili, Stuart D Armstrong, Jones Benjamin, Eleanor G Bentley, Anu Chawla, Jordan J Clark, Angela Cowell, Richard Eccles, Isabel Garcia-Dorival, Matthew Gemmell, Alessandro Gerada, PKF Gilmore, Richard Gregory, Ximeng Han, Catherine Hartley, Margaret Hughes, Miren Iturriza-Gomara, James Johnson, L Luu, Jenifer Manson, Charlotte Nelson, Elaine O'Toole, Cassie Olateju, Rebekah Penrice-Randal, Lucille Rainbow, N.P Randle, Trevor Ian Robinson, Parul Sharma, Ghada T Shawli, James P Stewart, Neil Swainston, Ecaterina Vamos, Joanne Watts, Mark Whitehead |
| EPI_ISL_813976                                                                                                                                                                                                                                                                                                                                                                                                                                                                                                                                                                                                                                                                                                                                                                                                                                                                                                                                                                                                                                                                                                                                 | Norwegian Institute of Public Health, Department of Virology                                                                                                                                    | Norwegian Institute of Public Health, Department of Virology | Kathrine Stene-Johansen, Kamilla Heddeland Instefjord, Hilde Elshaug, Atiya R Ali, Marie Paulsen Madsen, Rasmus Riis Kopperud, Hilde Vollan, Karoline Bragstad, Olav Hungnes                                                                                                                                                                                                                                                                                                                                                                                                                                                                                                            |
| EPI_ISL_813978                                                                                                                                                                                                                                                                                                                                                                                                                                                                                                                                                                                                                                                                                                                                                                                                                                                                                                                                                                                                                                                                                                                                 | University Hospital of Northern Norway, Department for Microbiology and Infectious Disease Control                                                                                              | Norwegian Institute of Public Health, Department of Virology | Kathrine Stene-Johansen, Kamilla Heddeland Instefjord, Hilde Elshaug, Atiya R Ali, Marie Paulsen Madsen, Rasmus Riis Kopperud, Hilde Vollan, Karoline Bragstad, Olav Hungnes                                                                                                                                                                                                                                                                                                                                                                                                                                                                                                            |
| EPI_ISL_814031, EPI_ISL_814055                                                                                                                                                                                                                                                                                                                                                                                                                                                                                                                                                                                                                                                                                                                                                                                                                                                                                                                                                                                                                                                                                                                 | Hospital General Universitario Gregorio Marañón                                                                                                                                                 | SeqCOVID-SPAIN consortium/IBV(CSIC)                          | Dario Garcia de Viedma, Laura Pérez-Lago, Marta Herranz, Jon Sicilia, Julia Suárez, Pilar Catalán, Patricia Muñoz and SeqCOVID-SPAIN consortium                                                                                                                                                                                                                                                                                                                                                                                                                                                                                                                                         |
| EPI_ISL_814097, EPI_ISL_814108, EPI_ISL_814113, EPI_ISL_814116, EPI_ISL_814118, EPI_ISL_814122, EPI_ISL_814123, EPI_ISL_814127, EPI_ISL_814130, EPI_ISL_814134, EPI_ISL_814145, EPI_ISL_814146, EPI_ISL_814147, EPI_ISL_814154, EPI_ISL_814157, EPI_ISL_814159, EPI_ISL_814163, EPI_ISL_814170, EPI_ISL_814171, EPI_ISL_814172, EPI_ISL_814175, EPI_ISL_814177, EPI_ISL_814239, EPI_ISL_814243                                                                                                                                                                                                                                                                                                                                                                                                                                                                                                                                                                                                                                                                                                                                                 |                                                                                                                                                                                                 |                                                              |                                                                                                                                                                                                                                                                                                                                                                                                                                                                                                                                                                                                                                                                                         |
| see above                                                                                                                                                                                                                                                                                                                                                                                                                                                                                                                                                                                                                                                                                                                                                                                                                                                                                                                                                                                                                                                                                                                                      | Israel Central Virology laboratory                                                                                                                                                              | Israel National Consortium for SARS-CoV-2 sequencing         | Neta Zuckerman, Efrat Dahan Bucris, Michal Mandelboim, Dana Bar-Ilan, Oran Erster, Tzvia Mann, Omer Murik, David A. Zeevi, Assaf Rokney, Joseph Jaffe, Eva Nachum, Maya Davidovich Cohen, Ephraim Fass, Gal Zizelski Valenci, Mor Rubinstein, Efrat Rorman, Israel Nissan, Efrat Glick-Saar, Omri Nayshool, Gideon Rechavi, Ella Mendelson, Orna Mor                                                                                                                                                                                                                                                                                                                                    |
| EPI_ISL_814418, EPI_ISL_814419, EPI_ISL_814421                                                                                                                                                                                                                                                                                                                                                                                                                                                                                                                                                                                                                                                                                                                                                                                                                                                                                                                                                                                                                                                                                                 | Bioinformatics and Biostatistics Lab, Advanced Sequencing Facility                                                                                                                              | COVID-19 Genomics UK (COG-UK) Consortium                     | Aengus Stewart, Jerome Nicod, Chelsea Sawyer, Laura Cubitt, Harshil Patel, Margaret Crawford                                                                                                                                                                                                                                                                                                                                                                                                                                                                                                                                                                                            |
| EPI_ISL_814423                                                                                                                                                                                                                                                                                                                                                                                                                                                                                                                                                                                                                                                                                                                                                                                                                                                                                                                                                                                                                                                                                                                                 | Wales Specialist Virology Centre Sequencing lab: Pathogen Genomics Unit                                                                                                                         | COVID-19 Genomics UK (COG-UK) Consortium                     | Catherine Moore, Johnathan Evans, Laura Gifford, Malorie Perry, Simon Cottrell, Angela Marchbank, Alec Birchley, Alexander Adams, Amy Gaskin, Bree Gatica-Wilcox, Jason Coombes, Joel Southgate, Lauren Gilbert, Lee Graham, Nicole Pacchiarini, Sara Kumziene-Summerhayes, Sarah Taylor, Sophie Jones, Sara Rey, Matthew Bull, Joanne Watkins, Sally Corden, Tom Connor                                                                                                                                                                                                                                                                                                                |
| EPI_ISL_814424, EPI_ISL_814425, EPI_ISL_814426, EPI_ISL_814428, EPI_ISL_814430, EPI_ISL_814432, EPI_ISL_814434, EPI_ISL_814435, EPI_ISL_814436, EPI_ISL_814438                                                                                                                                                                                                                                                                                                                                                                                                                                                                                                                                                                                                                                                                                                                                                                                                                                                                                                                                                                                 | Bioinformatics and Biostatistics Lab, Advanced Sequencing Facility                                                                                                                              | COVID-19 Genomics UK (COG-UK) Consortium                     | Aengus Stewart, Jerome Nicod, Chelsea Sawyer, Laura Cubitt, Harshil Patel, Margaret Crawford                                                                                                                                                                                                                                                                                                                                                                                                                                                                                                                                                                                            |
| EPI_ISL_814440, EPI_ISL_814441, EPI_ISL_814443, EPI_ISL_814444, EPI_ISL_814445, EPI_ISL_814448, EPI_ISL_814451, EPI_ISL_814452, EPI_ISL_814453, EPI_ISL_814455, EPI_ISL_814456, EPI_ISL_814457                                                                                                                                                                                                                                                                                                                                                                                                                                                                                                                                                                                                                                                                                                                                                                                                                                                                                                                                                 |                                                                                                                                                                                                 |                                                              |                                                                                                                                                                                                                                                                                                                                                                                                                                                                                                                                                                                                                                                                                         |
| see above                                                                                                                                                                                                                                                                                                                                                                                                                                                                                                                                                                                                                                                                                                                                                                                                                                                                                                                                                                                                                                                                                                                                      | West of Scotland Specialist Virology Centre, NHSGGC / MRC-University of Glasgow Centre for Virus Research                                                                                       | COVID-19 Genomics UK (COG-UK) Consortium                     | Ana da Silva Filipe, Natasha Johnson, Kathy Smollett, Daniel Mair, Stephen Carmichael, Alice Broos, Lily Tong, Jenna Nichols, Kyriaki Nomikou; Sarah McDonald; Richard Orton, Joseph Hughes, Sreenu Vattipally, David L Robertson; Alasdair MacLean, Rory Gunson; Sharif Shaaban, Matthew Holden; Rachel Blacow, Guy Mollett, Kathy Li, James Shepherd, Antonia Ho, Emma Thomson                                                                                                                                                                                                                                                                                                        |
| EPI_ISL_814460, EPI_ISL_814461, EPI_ISL_814462, EPI_ISL_814463, EPI_ISL_814465                                                                                                                                                                                                                                                                                                                                                                                                                                                                                                                                                                                                                                                                                                                                                                                                                                                                                                                                                                                                                                                                 | Virology Department, Royal Infirmary of Edinburgh, NHS Lothian / School of Biological Sciences, University of Edinburgh / Institute of Genetics and Molecular Medicine, University of Edinburgh | COVID-19 Genomics UK (COG-UK) Consortium                     | McHugh M, Dewar R, Rooke S, Gallagher M, Balcaza C, O'Toole Á, Scher E, Hill V, McCrone JT, Colquhoun R, Yu X, Jackson B, Rambaut A, Williams TC, Templeton K                                                                                                                                                                                                                                                                                                                                                                                                                                                                                                                           |
| EPI_ISL_814466, EPI_ISL_814467                                                                                                                                                                                                                                                                                                                                                                                                                                                                                                                                                                                                                                                                                                                                                                                                                                                                                                                                                                                                                                                                                                                 | Oxford Viromics, NDM, University of Oxford; Oxford University Hospitals; Basingstoke and North Hampshire Hospital                                                                               | COVID-19 Genomics UK (COG-UK) Consortium                     | Tanya Golubchik, David Bonsall, George Macintyre, Amy Trebes, Mariateresa de Cesare, Catrin Moore, Alex Mobbs, Anita Justice, Robert Shaw, Monique Andersson, Timothy Peto, Emma Wise, Nathan Moore, Jessica Lynch, Nick Cortes, Matilde Mori, Stephen Kidd, David Buck, John Todd, Christophe Fraser                                                                                                                                                                                                                                                                                                                                                                                   |
| EPI_ISL_814472, EPI_ISL_814481, EPI_ISL_814483, EPI_ISL_814484, EPI_ISL_814485, EPI_ISL_814502, EPI_ISL_814505, EPI_ISL_814506, EPI_ISL_814508, EPI_ISL_814509                                                                                                                                                                                                                                                                                                                                                                                                                                                                                                                                                                                                                                                                                                                                                                                                                                                                                                                                                                                 | Wales Specialist Virology Centre Sequencing lab: Pathogen Genomics Unit                                                                                                                         | COVID-19 Genomics UK (COG-UK) Consortium                     | Catherine Moore, Johnathan Evans, Laura Gifford, Malorie Perry, Simon Cottrell, Angela Marchbank, Alec Birchley, Alexander Adams, Amy Gaskin, Bree Gatica-Wilcox, Jason Coombes, Joel Southgate, Lauren Gilbert, Lee Graham, Nicole Pacchiarini, Sara Kumziene-Summerhayes, Sarah Taylor, Sophie Jones, Sara Rey, Matthew Bull, Joanne Watkins, Sally Corden, Tom Connor                                                                                                                                                                                                                                                                                                                |
| EPI_ISL_814518, EPI_ISL_814519, EPI_ISL_814520, EPI_ISL_814522                                                                                                                                                                                                                                                                                                                                                                                                                                                                                                                                                                                                                                                                                                                                                                                                                                                                                                                                                                                                                                                                                 | Bioinformatics and Biostatistics Lab, Advanced Sequencing Facility                                                                                                                              | COVID-19 Genomics UK (COG-UK) Consortium                     | Aengus Stewart, Jerome Nicod, Chelsea Sawyer, Laura Cubitt, Harshil Patel, Margaret Crawford                                                                                                                                                                                                                                                                                                                                                                                                                                                                                                                                                                                            |
| EPI_ISL_814568                                                                                                                                                                                                                                                                                                                                                                                                                                                                                                                                                                                                                                                                                                                                                                                                                                                                                                                                                                                                                                                                                                                                 | West of Scotland Specialist Virology Centre, NHSGGC / MRC-University of Glasgow Centre for Virus Research                                                                                       | COVID-19 Genomics UK (COG-UK) Consortium                     | Ana da Silva Filipe, Natasha Johnson, Kathy Smollett, Daniel Mair, Stephen Carmichael, Alice Broos, Lily Tong, Jenna Nichols, Kyriaki Nomikou; Sarah McDonald; Richard Orton, Joseph Hughes, Sreenu Vattipally, David L Robertson; Alasdair MacLean, Rory Gunson; Sharif Shaaban, Matthew Holden; Rachel Blacow, Guy Mollett, Kathy Li, James Shepherd, Antonia Ho, Emma Thomson                                                                                                                                                                                                                                                                                                        |
| EPI_ISL_814572                                                                                                                                                                                                                                                                                                                                                                                                                                                                                                                                                                                                                                                                                                                                                                                                                                                                                                                                                                                                                                                                                                                                 | Oxford Viromics, NDM, University of Oxford; Oxford University Hospitals; Basingstoke and North Hampshire Hospital                                                                               | COVID-19 Genomics UK (COG-UK) Consortium                     | Tanya Golubchik, David Bonsall, George Macintyre, Amy Trebes, Mariateresa de Cesare, Catrin Moore, Alex Mobbs, Anita Justice, Robert Shaw, Monique Andersson, Timothy Peto, Emma Wise, Nathan Moore, Jessica Lynch, Nick Cortes, Matilde Mori, Stephen Kidd, David Buck, John Todd, Christophe Fraser                                                                                                                                                                                                                                                                                                                                                                                   |
| EPI_ISL_814573, EPI_ISL_814583, EPI_ISL_814585                                                                                                                                                                                                                                                                                                                                                                                                                                                                                                                                                                                                                                                                                                                                                                                                                                                                                                                                                                                                                                                                                                 | Wales Specialist Virology Centre Sequencing lab: Pathogen Genomics Unit                                                                                                                         | COVID-19 Genomics UK (COG-UK) Consortium                     | Catherine Moore, Johnathan Evans, Laura Gifford, Malorie Perry, Simon Cottrell, Angela Marchbank, Alec Birchley, Alexander Adams, Amy Gaskin, Bree Gatica-Wilcox, Jason Coombes, Joel Southgate, Lauren Gilbert, Lee Graham, Nicole Pacchiarini, Sara Kumziene-Summerhayes, Sarah Taylor, Sophie Jones, Sara Rey, Matthew Bull, Joanne Watkins, Sally Corden, Tom Connor                                                                                                                                                                                                                                                                                                                |
| EPI_ISL_814590, EPI_ISL_814591, EPI_ISL_814593                                                                                                                                                                                                                                                                                                                                                                                                                                                                                                                                                                                                                                                                                                                                                                                                                                                                                                                                                                                                                                                                                                 | West of Scotland Specialist Virology Centre, NHSGGC / MRC-University of Glasgow Centre for Virus Research                                                                                       | COVID-19 Genomics UK (COG-UK) Consortium                     | Ana da Silva Filipe, Natasha Johnson, Kathy Smollett, Daniel Mair, Stephen Carmichael, Alice Broos, Lily Tong, Jenna Nichols, Kyriaki Nomikou; Sarah McDonald; Richard Orton, Joseph Hughes, Sreenu Vattipally, David L Robertson; Alasdair MacLean, Rory Gunson; Sharif Shaaban, Matthew Holden; Rachel Blacow, Guy Mollett, Kathy Li, James Shepherd, Antonia Ho, Emma Thomson                                                                                                                                                                                                                                                                                                        |
| EPI_ISL_814594                                                                                                                                                                                                                                                                                                                                                                                                                                                                                                                                                                                                                                                                                                                                                                                                                                                                                                                                                                                                                                                                                                                                 | Oxford Viromics, NDM, University of Oxford; Oxford University Hospitals; Basingstoke and North Hampshire Hospital                                                                               | COVID-19 Genomics UK (COG-UK) Consortium                     | Tanya Golubchik, David Bonsall, George Macintyre, Amy Trebes, Mariateresa de Cesare, Catrin Moore, Alex Mobbs, Anita Justice, Robert Shaw, Monique Andersson, Timothy Peto, Emma Wise, Nathan Moore, Jessica Lynch, Nick Cortes, Matilde Mori, Stephen Kidd, David Buck, John Todd, Christophe Fraser                                                                                                                                                                                                                                                                                                                                                                                   |
| EPI_ISL_814596, EPI_ISL_814598, EPI_ISL_814600, EPI_ISL_814601                                                                                                                                                                                                                                                                                                                                                                                                                                                                                                                                                                                                                                                                                                                                                                                                                                                                                                                                                                                                                                                                                 | Wales Specialist Virology Centre Sequencing lab: Pathogen Genomics Unit                                                                                                                         | COVID-19 Genomics UK (COG-UK) Consortium                     | Catherine Moore, Johnathan Evans, Laura Gifford, Malorie Perry, Simon Cottrell, Angela Marchbank, Alec Birchley, Alexander Adams, Amy Gaskin, Bree Gatica-Wilcox, Jason Coombes, Joel Southgate, Lauren Gilbert, Lee Graham, Nicole Pacchiarini, Sara Kumziene-Summerhayes, Sarah Taylor, Sophie Jones, Sara Rey, Matthew Bull, Joanne Watkins, Sally Corden, Tom Connor                                                                                                                                                                                                                                                                                                                |
| EPI_ISL_814610, EPI_ISL_814611, EPI_ISL_814612, EPI_ISL_814616, EPI_ISL_814618                                                                                                                                                                                                                                                                                                                                                                                                                                                                                                                                                                                                                                                                                                                                                                                                                                                                                                                                                                                                                                                                 | Bioinformatics and Biostatistics Lab, Advanced Sequencing Facility                                                                                                                              | COVID-19 Genomics UK (COG-UK) Consortium                     | Aengus Stewart, Jerome Nicod, Chelsea Sawyer, Laura Cubitt, Harshil Patel, Margaret Crawford                                                                                                                                                                                                                                                                                                                                                                                                                                                                                                                                                                                            |
| EPI_ISL_814622, EPI_ISL_814626, EPI_ISL_814628, EPI_ISL_814630, EPI_ISL_814631, EPI_ISL_814632, EPI_ISL_814638, EPI_ISL_814639, EPI_ISL_814641, EPI_ISL_814647, EPI_ISL_814650, EPI_ISL_814661                                                                                                                                                                                                                                                                                                                                                                                                                                                                                                                                                                                                                                                                                                                                                                                                                                                                                                                                                 |                                                                                                                                                                                                 |                                                              |                                                                                                                                                                                                                                                                                                                                                                                                                                                                                                                                                                                                                                                                                         |
| see above                                                                                                                                                                                                                                                                                                                                                                                                                                                                                                                                                                                                                                                                                                                                                                                                                                                                                                                                                                                                                                                                                                                                      | West of Scotland Specialist Virology Centre, NHSGGC / MRC-University of Glasgow Centre for Virus Research                                                                                       | COVID-19 Genomics UK (COG-UK) Consortium                     | Ana da Silva Filipe, Natasha Johnson, Kathy Smollett, Daniel Mair, Stephen Carmichael, Alice Broos, Lily Tong, Jenna Nichols, Kyriaki Nomikou; Sarah McDonald; Richard Orton, Joseph Hughes, Sreenu Vattipally, David L Robertson; Alasdair MacLean, Rory Gunson; Sharif Shaaban, Matthew Holden;                                                                                                                                                                                                                                                                                                                                                                                       |



|                                                                                                                                                                                                                                                                                                                                                                                                                                                                                                                                                                                                                                                                                                                                                                                                                                                                                                                                                                                                                                                                                                                                                                                                                                                                                                                                                                                                                                                                                                                                                                                                                                                                                                                                                                                                                                                                                                                                                                                                                                                                                                                                                                                                                                                                                                                                                                                                                                                                                                                                                                                                                                                                                                                                                                                                                                                                                                                                                                                                                                                                                                                                                                                                                                                                                                                                                                                                                                                                                                                                                                                                                                                                                                                                                                                                                                                                                                                                                                                                                                                                                                                                                                                                |           |                                                                                                                                                                                                                     |                                                                                    |                                                                                                                                                                                                                                                                                                                                                                                                                                                         |
|------------------------------------------------------------------------------------------------------------------------------------------------------------------------------------------------------------------------------------------------------------------------------------------------------------------------------------------------------------------------------------------------------------------------------------------------------------------------------------------------------------------------------------------------------------------------------------------------------------------------------------------------------------------------------------------------------------------------------------------------------------------------------------------------------------------------------------------------------------------------------------------------------------------------------------------------------------------------------------------------------------------------------------------------------------------------------------------------------------------------------------------------------------------------------------------------------------------------------------------------------------------------------------------------------------------------------------------------------------------------------------------------------------------------------------------------------------------------------------------------------------------------------------------------------------------------------------------------------------------------------------------------------------------------------------------------------------------------------------------------------------------------------------------------------------------------------------------------------------------------------------------------------------------------------------------------------------------------------------------------------------------------------------------------------------------------------------------------------------------------------------------------------------------------------------------------------------------------------------------------------------------------------------------------------------------------------------------------------------------------------------------------------------------------------------------------------------------------------------------------------------------------------------------------------------------------------------------------------------------------------------------------------------------------------------------------------------------------------------------------------------------------------------------------------------------------------------------------------------------------------------------------------------------------------------------------------------------------------------------------------------------------------------------------------------------------------------------------------------------------------------------------------------------------------------------------------------------------------------------------------------------------------------------------------------------------------------------------------------------------------------------------------------------------------------------------------------------------------------------------------------------------------------------------------------------------------------------------------------------------------------------------------------------------------------------------------------------------------------------------------------------------------------------------------------------------------------------------------------------------------------------------------------------------------------------------------------------------------------------------------------------------------------------------------------------------------------------------------------------------------------------------------------------------------------------------|-----------|---------------------------------------------------------------------------------------------------------------------------------------------------------------------------------------------------------------------|------------------------------------------------------------------------------------|---------------------------------------------------------------------------------------------------------------------------------------------------------------------------------------------------------------------------------------------------------------------------------------------------------------------------------------------------------------------------------------------------------------------------------------------------------|
| EPI_ISL_817832, EPI_ISL_817833, EPI_ISL_817835, EPI_ISL_817836, EPI_ISL_817837, EPI_ISL_817838, EPI_ISL_817839, EPI_ISL_817840, EPI_ISL_817841, EPI_ISL_817842, EPI_ISL_817844, EPI_ISL_817845, EPI_ISL_817846, EPI_ISL_817847, EPI_ISL_817848, EPI_ISL_817849, EPI_ISL_817850, EPI_ISL_817851, EPI_ISL_817852, EPI_ISL_817853, EPI_ISL_817854, EPI_ISL_817855, EPI_ISL_817856, EPI_ISL_817857, EPI_ISL_817858, EPI_ISL_817859, EPI_ISL_817860, EPI_ISL_817861, EPI_ISL_817862, EPI_ISL_817864, EPI_ISL_817865, EPI_ISL_817866, EPI_ISL_817867, EPI_ISL_817868, EPI_ISL_817869, EPI_ISL_817870, EPI_ISL_817871, EPI_ISL_817872, EPI_ISL_817873, EPI_ISL_817874, EPI_ISL_817875, EPI_ISL_817876, EPI_ISL_817878, EPI_ISL_817879, EPI_ISL_817881, EPI_ISL_817882, EPI_ISL_817883, EPI_ISL_817884, EPI_ISL_817886, EPI_ISL_817889, EPI_ISL_817890, EPI_ISL_817891, EPI_ISL_817892, EPI_ISL_817893, EPI_ISL_817894, EPI_ISL_817895, EPI_ISL_817896, EPI_ISL_817897, EPI_ISL_817898, EPI_ISL_817899, EPI_ISL_817900, EPI_ISL_817901, EPI_ISL_817902, EPI_ISL_817903, EPI_ISL_817905, EPI_ISL_817906, EPI_ISL_817907, EPI_ISL_817908, EPI_ISL_817909, EPI_ISL_817910, EPI_ISL_817911, EPI_ISL_817912, EPI_ISL_817913, EPI_ISL_817914, EPI_ISL_817915, EPI_ISL_817916, EPI_ISL_817917, EPI_ISL_817918, EPI_ISL_817919, EPI_ISL_817922, EPI_ISL_817923, EPI_ISL_817924, EPI_ISL_817925, EPI_ISL_817926, EPI_ISL_817928, EPI_ISL_817929, EPI_ISL_817930, EPI_ISL_817931, EPI_ISL_817932, EPI_ISL_817933, EPI_ISL_817934, EPI_ISL_817935, EPI_ISL_817936, EPI_ISL_817937, EPI_ISL_817938, EPI_ISL_817939, EPI_ISL_817940, EPI_ISL_817941, EPI_ISL_817942, EPI_ISL_817943, EPI_ISL_817944, EPI_ISL_817945, EPI_ISL_817946, EPI_ISL_817947, EPI_ISL_817948, EPI_ISL_817949, EPI_ISL_817951, EPI_ISL_817953, EPI_ISL_817954, EPI_ISL_817955, EPI_ISL_817957, EPI_ISL_817958, EPI_ISL_817959, EPI_ISL_817961, EPI_ISL_817962, EPI_ISL_817963, EPI_ISL_817964, EPI_ISL_817965, EPI_ISL_817966, EPI_ISL_817967, EPI_ISL_817968, EPI_ISL_817969, EPI_ISL_817970, EPI_ISL_817971, EPI_ISL_817972, EPI_ISL_817973, EPI_ISL_817974, EPI_ISL_817975, EPI_ISL_817977, EPI_ISL_817978, EPI_ISL_817979, EPI_ISL_817980, EPI_ISL_817981, EPI_ISL_817982, EPI_ISL_817983, EPI_ISL_817985, EPI_ISL_817986, EPI_ISL_817987, EPI_ISL_817989, EPI_ISL_817990, EPI_ISL_817991, EPI_ISL_817992, EPI_ISL_817994, EPI_ISL_817995, EPI_ISL_817996, EPI_ISL_817998, EPI_ISL_817999, EPI_ISL_818000, EPI_ISL_818001, EPI_ISL_818002, EPI_ISL_818003, EPI_ISL_818004, EPI_ISL_818005, EPI_ISL_818006, EPI_ISL_818007, EPI_ISL_818008, EPI_ISL_818009, EPI_ISL_818010, EPI_ISL_818011, EPI_ISL_818012, EPI_ISL_818013, EPI_ISL_818014, EPI_ISL_818015, EPI_ISL_818016, EPI_ISL_818017, EPI_ISL_818018, EPI_ISL_818019, EPI_ISL_818020, EPI_ISL_818022, EPI_ISL_818023, EPI_ISL_818026, EPI_ISL_818027, EPI_ISL_818028, EPI_ISL_818029, EPI_ISL_818030, EPI_ISL_818031, EPI_ISL_818032, EPI_ISL_818033, EPI_ISL_818034, EPI_ISL_818035, EPI_ISL_818036, EPI_ISL_818037, EPI_ISL_818038, EPI_ISL_818039, EPI_ISL_818040, EPI_ISL_818042, EPI_ISL_818043, EPI_ISL_818044, EPI_ISL_818045, EPI_ISL_818046, EPI_ISL_818047, EPI_ISL_818048, EPI_ISL_818050, EPI_ISL_818052, EPI_ISL_818053, EPI_ISL_818054, EPI_ISL_818055, EPI_ISL_818056, EPI_ISL_818057, EPI_ISL_818059, EPI_ISL_818061, EPI_ISL_818062, EPI_ISL_818063, EPI_ISL_818065, EPI_ISL_818069, EPI_ISL_818070, EPI_ISL_818071, EPI_ISL_818072, EPI_ISL_818073, EPI_ISL_818074, EPI_ISL_818075, EPI_ISL_818076, EPI_ISL_818079, EPI_ISL_818081, EPI_ISL_818082, EPI_ISL_818083, EPI_ISL_818084, EPI_ISL_818085, EPI_ISL_818086, EPI_ISL_818087, EPI_ISL_818088, EPI_ISL_818089, EPI_ISL_818090, EPI_ISL_818091, EPI_ISL_818092, EPI_ISL_818093, EPI_ISL_818094, EPI_ISL_818095, EPI_ISL_818097, EPI_ISL_818098, EPI_ISL_818099, EPI_ISL_818100, EPI_ISL_818101, EPI_ISL_818102, EPI_ISL_818103, EPI_ISL_818104, EPI_ISL_818105, EPI_ISL_818106, EPI_ISL_818107, EPI_ISL_818108, EPI_ISL_818109, EPI_ISL_818110, EPI_ISL_818112, EPI_ISL_818113, EPI_ISL_818114, EPI_ISL_818115, EPI_ISL_818116, EPI_ISL_818117, EPI_ISL_818118, EPI_ISL_818119, EPI_ISL_818121, EPI_ISL_818122 | see above | Department of Virus and Microbiological Special Diagnostics, Statens Serum Institut, Copenhagen, Denmark                                                                                                            | Albertain Lab, Department of Chemistry and Bioscience, Aalborg University, Denmark | Danish Covid-19 Genome Consortium                                                                                                                                                                                                                                                                                                                                                                                                                       |
| EPI_ISL_819163, EPI_ISL_819169, EPI_ISL_819170, EPI_ISL_819173, EPI_ISL_819184, EPI_ISL_819185, EPI_ISL_819193, EPI_ISL_819194, EPI_ISL_819197, EPI_ISL_819200                                                                                                                                                                                                                                                                                                                                                                                                                                                                                                                                                                                                                                                                                                                                                                                                                                                                                                                                                                                                                                                                                                                                                                                                                                                                                                                                                                                                                                                                                                                                                                                                                                                                                                                                                                                                                                                                                                                                                                                                                                                                                                                                                                                                                                                                                                                                                                                                                                                                                                                                                                                                                                                                                                                                                                                                                                                                                                                                                                                                                                                                                                                                                                                                                                                                                                                                                                                                                                                                                                                                                                                                                                                                                                                                                                                                                                                                                                                                                                                                                                 |           | Servicio de Microbiología, Hospital Universitario Son Espases                                                                                                                                                       | SeqCOVID-SPAIN consortium/IBV(CSIC)                                                | Carla López-Causapé, Jordi Reina, Antonio Oliver and SeqCOVID-SPAIN consortium                                                                                                                                                                                                                                                                                                                                                                          |
| EPI_ISL_819398, EPI_ISL_819400, EPI_ISL_819401                                                                                                                                                                                                                                                                                                                                                                                                                                                                                                                                                                                                                                                                                                                                                                                                                                                                                                                                                                                                                                                                                                                                                                                                                                                                                                                                                                                                                                                                                                                                                                                                                                                                                                                                                                                                                                                                                                                                                                                                                                                                                                                                                                                                                                                                                                                                                                                                                                                                                                                                                                                                                                                                                                                                                                                                                                                                                                                                                                                                                                                                                                                                                                                                                                                                                                                                                                                                                                                                                                                                                                                                                                                                                                                                                                                                                                                                                                                                                                                                                                                                                                                                                 |           | Quadram Institute Bioscience                                                                                                                                                                                        | COVID-19 Genomics UK (COG-UK) Consortium                                           | Dave J. Baker, Gemma L. Kay, Alp Aydin, Thanh Le-Viet, Steven Rudder, Ana P. Tedim, Anastasia Kolyva, Maria Diaz, Leonardo de Oliveira Martins, Nabil-Fareed Alkhan, Lizzie Meadows, Rachael Stanley, Ngozi Elumogo, Muhammed Yasir, Nicholas M. Thomson, Alexander J Trotter, Rachel Gilroy, Samuel Bloomfield, Claire Stuart, Andrew Bell, Reenesh Prakash, Samir Devisevic, Alison E. Mather, John Wain, Mark Webber, Andrew J. Page, Justin O'Grady |
| EPI_ISL_819568                                                                                                                                                                                                                                                                                                                                                                                                                                                                                                                                                                                                                                                                                                                                                                                                                                                                                                                                                                                                                                                                                                                                                                                                                                                                                                                                                                                                                                                                                                                                                                                                                                                                                                                                                                                                                                                                                                                                                                                                                                                                                                                                                                                                                                                                                                                                                                                                                                                                                                                                                                                                                                                                                                                                                                                                                                                                                                                                                                                                                                                                                                                                                                                                                                                                                                                                                                                                                                                                                                                                                                                                                                                                                                                                                                                                                                                                                                                                                                                                                                                                                                                                                                                 |           | Northumbria University / South Tees Hospitals NHS Foundation Trust / North Cumbria Integrated Care NHS Foundation Trust / North Tees and Hartlepool NHS Foundation Trust / Newcastle Hospitals NHS Foundation Trust | COVID-19 Genomics UK (COG-UK) Consortium                                           | Darren L Smith, Andrew Nelson, Matthew Bashton, Greg R Young, Joshua Loh, John Allan, Mohammad A Tariq, Giles S Holt, Gary Black, Wen C Yew, Lynn Dover, Paul Baker, Steve Liggett, Sarah Essex, Jane Greenaway, Debra Padgett, Clive Graham, Garren Scott, Edward Barton, Emma Swindells, Brendan Payne, Jennifer Collins, Yusri Taha, Gary Eltringham                                                                                                 |
| EPI_ISL_819578                                                                                                                                                                                                                                                                                                                                                                                                                                                                                                                                                                                                                                                                                                                                                                                                                                                                                                                                                                                                                                                                                                                                                                                                                                                                                                                                                                                                                                                                                                                                                                                                                                                                                                                                                                                                                                                                                                                                                                                                                                                                                                                                                                                                                                                                                                                                                                                                                                                                                                                                                                                                                                                                                                                                                                                                                                                                                                                                                                                                                                                                                                                                                                                                                                                                                                                                                                                                                                                                                                                                                                                                                                                                                                                                                                                                                                                                                                                                                                                                                                                                                                                                                                                 |           | Oxford Viromics, NDM, University of Oxford; Oxford University Hospitals; Basingstoke and North Hampshire Hospital                                                                                                   | COVID-19 Genomics UK (COG-UK) Consortium                                           | Tanya Golubchik, David Bonsall, George Macintyre, Amy Trebes, Mariateresa de Cesare, Catrin Moore, Alex Mobbs, Anita Justice, Robert Shaw, Monique Andersson, Timothy Peto, Emma Wise, Nathan Moore, Jessica Lynch, Nick Cortes, Matilde Mori, Stephen Kidd, David Buck, John Todd, Christophe Fraser                                                                                                                                                   |
| EPI_ISL_819584                                                                                                                                                                                                                                                                                                                                                                                                                                                                                                                                                                                                                                                                                                                                                                                                                                                                                                                                                                                                                                                                                                                                                                                                                                                                                                                                                                                                                                                                                                                                                                                                                                                                                                                                                                                                                                                                                                                                                                                                                                                                                                                                                                                                                                                                                                                                                                                                                                                                                                                                                                                                                                                                                                                                                                                                                                                                                                                                                                                                                                                                                                                                                                                                                                                                                                                                                                                                                                                                                                                                                                                                                                                                                                                                                                                                                                                                                                                                                                                                                                                                                                                                                                                 |           | Queens Medical Centre, Clinical Microbiology Department / DeepSeq Nottingham                                                                                                                                        | COVID-19 Genomics UK (COG-UK) Consortium                                           | Gemma Clark, Wendy Smith, Manjinder Khakh, Vicki M Fleming, Michelle M Lister, Hannah Howson-Wells, Jonathan Ball, Patrick McClure, Joseph Chappell, Theocharis Tsoleridis, Nadine Holmes, Matthew Carlisle, Christopher Moore, Fei Sang, Johnny Debebe, Victoria Wright, Matthew Loose                                                                                                                                                                 |
| EPI_ISL_819585, EPI_ISL_819586, EPI_ISL_819587, EPI_ISL_819590, EPI_ISL_819591, EPI_ISL_819592, EPI_ISL_819593                                                                                                                                                                                                                                                                                                                                                                                                                                                                                                                                                                                                                                                                                                                                                                                                                                                                                                                                                                                                                                                                                                                                                                                                                                                                                                                                                                                                                                                                                                                                                                                                                                                                                                                                                                                                                                                                                                                                                                                                                                                                                                                                                                                                                                                                                                                                                                                                                                                                                                                                                                                                                                                                                                                                                                                                                                                                                                                                                                                                                                                                                                                                                                                                                                                                                                                                                                                                                                                                                                                                                                                                                                                                                                                                                                                                                                                                                                                                                                                                                                                                                 |           | Oxford Viromics, NDM, University of Oxford; Oxford University Hospitals; Basingstoke and North Hampshire Hospital                                                                                                   | COVID-19 Genomics UK (COG-UK) Consortium                                           | Tanya Golubchik, David Bonsall, George Macintyre, Amy Trebes, Mariateresa de Cesare, Catrin Moore, Alex Mobbs, Anita Justice, Robert Shaw, Monique Andersson, Timothy Peto, Emma Wise, Nathan Moore, Jessica Lynch, Nick Cortes, Matilde Mori, Stephen Kidd, David Buck, John Todd, Christophe Fraser                                                                                                                                                   |
| EPI_ISL_819597, EPI_ISL_819598, EPI_ISL_819599, EPI_ISL_819600, EPI_ISL_819602, EPI_ISL_819603, EPI_ISL_819604                                                                                                                                                                                                                                                                                                                                                                                                                                                                                                                                                                                                                                                                                                                                                                                                                                                                                                                                                                                                                                                                                                                                                                                                                                                                                                                                                                                                                                                                                                                                                                                                                                                                                                                                                                                                                                                                                                                                                                                                                                                                                                                                                                                                                                                                                                                                                                                                                                                                                                                                                                                                                                                                                                                                                                                                                                                                                                                                                                                                                                                                                                                                                                                                                                                                                                                                                                                                                                                                                                                                                                                                                                                                                                                                                                                                                                                                                                                                                                                                                                                                                 |           | Queens Medical Centre, Clinical Microbiology Department / DeepSeq Nottingham                                                                                                                                        | COVID-19 Genomics UK (COG-UK) Consortium                                           | Gemma Clark, Wendy Smith, Manjinder Khakh, Vicki M Fleming, Michelle M Lister, Hannah Howson-Wells, Jonathan Ball, Patrick McClure, Joseph Chappell, Theocharis Tsoleridis, Nadine Holmes, Matthew Carlisle, Christopher Moore, Fei Sang, Johnny Debebe, Victoria Wright, Matthew Loose                                                                                                                                                                 |
| EPI_ISL_819605, EPI_ISL_819607, EPI_ISL_819608, EPI_ISL_819613, EPI_ISL_819614, EPI_ISL_819615, EPI_ISL_819616, EPI_ISL_819617, EPI_ISL_819619, EPI_ISL_819620, EPI_ISL_819621, EPI_ISL_819622, EPI_ISL_819623, EPI_ISL_819624, EPI_ISL_819625, EPI_ISL_819626, EPI_ISL_819627, EPI_ISL_819629, EPI_ISL_819630, EPI_ISL_819631, EPI_ISL_819632, EPI_ISL_819633, EPI_ISL_819634, EPI_ISL_819635, EPI_ISL_819636, EPI_ISL_819637, EPI_ISL_819638, EPI_ISL_819639, EPI_ISL_819640, EPI_ISL_819642, EPI_ISL_819643, EPI_ISL_819644, EPI_ISL_819645, EPI_ISL_819646                                                                                                                                                                                                                                                                                                                                                                                                                                                                                                                                                                                                                                                                                                                                                                                                                                                                                                                                                                                                                                                                                                                                                                                                                                                                                                                                                                                                                                                                                                                                                                                                                                                                                                                                                                                                                                                                                                                                                                                                                                                                                                                                                                                                                                                                                                                                                                                                                                                                                                                                                                                                                                                                                                                                                                                                                                                                                                                                                                                                                                                                                                                                                                                                                                                                                                                                                                                                                                                                                                                                                                                                                                 | see above | Oxford Viromics, NDM, University of Oxford; Oxford University Hospitals; Basingstoke and North Hampshire Hospital                                                                                                   | COVID-19 Genomics UK (COG-UK) Consortium                                           | Tanya Golubchik, David Bonsall, George Macintyre, Amy Trebes, Mariateresa de Cesare, Catrin Moore, Alex Mobbs, Anita Justice, Robert Shaw, Monique Andersson, Timothy Peto, Emma Wise, Nathan Moore, Jessica Lynch, Nick Cortes, Matilde Mori, Stephen Kidd, David Buck, John Todd, Christophe Fraser                                                                                                                                                   |
| EPI_ISL_819648, EPI_ISL_819649, EPI_ISL_819652                                                                                                                                                                                                                                                                                                                                                                                                                                                                                                                                                                                                                                                                                                                                                                                                                                                                                                                                                                                                                                                                                                                                                                                                                                                                                                                                                                                                                                                                                                                                                                                                                                                                                                                                                                                                                                                                                                                                                                                                                                                                                                                                                                                                                                                                                                                                                                                                                                                                                                                                                                                                                                                                                                                                                                                                                                                                                                                                                                                                                                                                                                                                                                                                                                                                                                                                                                                                                                                                                                                                                                                                                                                                                                                                                                                                                                                                                                                                                                                                                                                                                                                                                 |           | Queens Medical Centre, Clinical Microbiology Department / DeepSeq Nottingham                                                                                                                                        | COVID-19 Genomics UK (COG-UK) Consortium                                           | Gemma Clark, Wendy Smith, Manjinder Khakh, Vicki M Fleming, Michelle M Lister, Hannah Howson-Wells, Jonathan Ball, Patrick McClure, Joseph Chappell, Theocharis Tsoleridis, Nadine Holmes, Matthew Carlisle, Christopher Moore, Fei Sang, Johnny Debebe, Victoria Wright, Matthew Loose                                                                                                                                                                 |
| EPI_ISL_819653, EPI_ISL_819654, EPI_ISL_819655, EPI_ISL_819656, EPI_ISL_819657, EPI_ISL_819658, EPI_ISL_819659, EPI_ISL_819660, EPI_ISL_819661, EPI_ISL_819662, EPI_ISL_819663, EPI_ISL_819664, EPI_ISL_819665, EPI_ISL_819666, EPI_ISL_819667, EPI_ISL_819668, EPI_ISL_819670, EPI_ISL_819675, EPI_ISL_819676, EPI_ISL_819677, EPI_ISL_819678, EPI_ISL_819679, EPI_ISL_819680, EPI_ISL_819681, EPI_ISL_819682, EPI_ISL_819683, EPI_ISL_819684                                                                                                                                                                                                                                                                                                                                                                                                                                                                                                                                                                                                                                                                                                                                                                                                                                                                                                                                                                                                                                                                                                                                                                                                                                                                                                                                                                                                                                                                                                                                                                                                                                                                                                                                                                                                                                                                                                                                                                                                                                                                                                                                                                                                                                                                                                                                                                                                                                                                                                                                                                                                                                                                                                                                                                                                                                                                                                                                                                                                                                                                                                                                                                                                                                                                                                                                                                                                                                                                                                                                                                                                                                                                                                                                                 | see above | Oxford Viromics, NDM, University of Oxford; Oxford University Hospitals; Basingstoke and North Hampshire Hospital                                                                                                   | COVID-19 Genomics UK (COG-UK) Consortium                                           | Tanya Golubchik, David Bonsall, George Macintyre, Amy Trebes, Mariateresa de Cesare, Catrin Moore, Alex Mobbs, Anita Justice, Robert Shaw, Monique Andersson, Timothy Peto, Emma Wise, Nathan Moore, Jessica Lynch, Nick Cortes, Matilde Mori, Stephen Kidd, David Buck, John Todd, Christophe Fraser                                                                                                                                                   |
| EPI_ISL_819686, EPI_ISL_819688                                                                                                                                                                                                                                                                                                                                                                                                                                                                                                                                                                                                                                                                                                                                                                                                                                                                                                                                                                                                                                                                                                                                                                                                                                                                                                                                                                                                                                                                                                                                                                                                                                                                                                                                                                                                                                                                                                                                                                                                                                                                                                                                                                                                                                                                                                                                                                                                                                                                                                                                                                                                                                                                                                                                                                                                                                                                                                                                                                                                                                                                                                                                                                                                                                                                                                                                                                                                                                                                                                                                                                                                                                                                                                                                                                                                                                                                                                                                                                                                                                                                                                                                                                 |           | Queens Medical Centre, Clinical Microbiology Department / DeepSeq Nottingham                                                                                                                                        | COVID-19 Genomics UK (COG-UK) Consortium                                           | Gemma Clark, Wendy Smith, Manjinder Khakh, Vicki M Fleming, Michelle M Lister, Hannah Howson-Wells, Jonathan Ball, Patrick McClure, Joseph Chappell, Theocharis Tsoleridis, Nadine Holmes, Matthew Carlisle, Christopher Moore, Fei Sang, Johnny Debebe, Victoria Wright, Matthew Loose                                                                                                                                                                 |
| EPI_ISL_819689, EPI_ISL_819690, EPI_ISL_819691, EPI_ISL_819692, EPI_ISL_819693, EPI_ISL_819694, EPI_ISL_819695, EPI_ISL_819696, EPI_ISL_819697, EPI_ISL_819698, EPI_ISL_819699, EPI_ISL_819700, EPI_ISL_819701, EPI_ISL_819702, EPI_ISL_819703, EPI_ISL_819704, EPI_ISL_819705                                                                                                                                                                                                                                                                                                                                                                                                                                                                                                                                                                                                                                                                                                                                                                                                                                                                                                                                                                                                                                                                                                                                                                                                                                                                                                                                                                                                                                                                                                                                                                                                                                                                                                                                                                                                                                                                                                                                                                                                                                                                                                                                                                                                                                                                                                                                                                                                                                                                                                                                                                                                                                                                                                                                                                                                                                                                                                                                                                                                                                                                                                                                                                                                                                                                                                                                                                                                                                                                                                                                                                                                                                                                                                                                                                                                                                                                                                                 | see above | Oxford Viromics, NDM, University of Oxford; Oxford University Hospitals; Basingstoke and North Hampshire Hospital                                                                                                   | COVID-19 Genomics UK (COG-UK) Consortium                                           | Tanya Golubchik, David Bonsall, George Macintyre, Amy Trebes, Mariateresa de Cesare, Catrin Moore, Alex Mobbs, Anita Justice, Robert Shaw, Monique Andersson, Timothy Peto, Emma Wise, Nathan Moore, Jessica Lynch, Nick Cortes, Matilde Mori, Stephen Kidd, David Buck, John Todd, Christophe Fraser                                                                                                                                                   |



We gratefully acknowledge the following Authors from the Originating laboratories responsible for obtaining the specimens, as well as the Submitting laboratories where the genome data were generated and shared via GISAID, on which this research is based.

All Submitters of data may be contacted directly via [www.gisaid.org](http://www.gisaid.org)

Authors are sorted alphabetically.

| Accession ID                                                                                                                                                                                                                                                                                                                                                                                                                                                                                                                                                                                                                                                                                                                                                                                                                                                                                   | Originating Laboratory                                                                                            | Submitting Laboratory                                                      | Authors                                                                                                                                                                                                                                                                                                                                                                                                                                                   |
|------------------------------------------------------------------------------------------------------------------------------------------------------------------------------------------------------------------------------------------------------------------------------------------------------------------------------------------------------------------------------------------------------------------------------------------------------------------------------------------------------------------------------------------------------------------------------------------------------------------------------------------------------------------------------------------------------------------------------------------------------------------------------------------------------------------------------------------------------------------------------------------------|-------------------------------------------------------------------------------------------------------------------|----------------------------------------------------------------------------|-----------------------------------------------------------------------------------------------------------------------------------------------------------------------------------------------------------------------------------------------------------------------------------------------------------------------------------------------------------------------------------------------------------------------------------------------------------|
| EPI_ISL_819706, EPI_ISL_819708, EPI_ISL_819709, EPI_ISL_819712, EPI_ISL_819713, EPI_ISL_819714, EPI_ISL_819716, EPI_ISL_819717, EPI_ISL_819718, EPI_ISL_819719, EPI_ISL_819721, EPI_ISL_819722                                                                                                                                                                                                                                                                                                                                                                                                                                                                                                                                                                                                                                                                                                 |                                                                                                                   |                                                                            |                                                                                                                                                                                                                                                                                                                                                                                                                                                           |
| see above                                                                                                                                                                                                                                                                                                                                                                                                                                                                                                                                                                                                                                                                                                                                                                                                                                                                                      | Oxford Viromics, NDM, University of Oxford; Oxford University Hospitals; Basingstoke and North Hampshire Hospital | COVID-19 Genomics UK (COG-UK) Consortium                                   | Tanya Golubchik, David Bonsall, George Macintyre, Amy Trebes, Mariateresa de Cesare, Catrin Moore, Alex Mobbs, Anita Justice, Robert Shaw, Monique Andersson, Timothy Peto, Emma Wise, Nathan Moore, Jessica Lynch, Nick Cortes, Matilde Mori, Stephen Kidd, David Buck, John Todd, Christophe Fraser                                                                                                                                                     |
| EPI_ISL_819724, EPI_ISL_819726, EPI_ISL_819727, EPI_ISL_819729                                                                                                                                                                                                                                                                                                                                                                                                                                                                                                                                                                                                                                                                                                                                                                                                                                 | Queens Medical Centre, Clinical Microbiology Department / DeepSeq Nottingham                                      | COVID-19 Genomics UK (COG-UK) Consortium                                   | Gemma Clark, Wendy Smith, Manjinder Khakh, Vicki M Fleming, Michelle M Lister, Hannah Howson-Wells, Jonathan Ball, Patrick McClure, Joseph Chappell, Theocharis Tsoleridis, Nadine Holmes, Matthew Carlisle, Christopher Moore, Fei Sang, Johnny Debebe, Victoria Wright, Matthew Loose                                                                                                                                                                   |
| EPI_ISL_819732, EPI_ISL_819733, EPI_ISL_819735, EPI_ISL_819736, EPI_ISL_819739, EPI_ISL_819740, EPI_ISL_819741, EPI_ISL_819742, EPI_ISL_819743, EPI_ISL_819744, EPI_ISL_819745, EPI_ISL_819746, EPI_ISL_819747, EPI_ISL_819749, EPI_ISL_819750, EPI_ISL_819751, EPI_ISL_819752, EPI_ISL_819753, EPI_ISL_819754, EPI_ISL_819756, EPI_ISL_819759, EPI_ISL_819760, EPI_ISL_819761, EPI_ISL_819762, EPI_ISL_819764, EPI_ISL_819765, EPI_ISL_819766, EPI_ISL_819767, EPI_ISL_819769, EPI_ISL_819770, EPI_ISL_819771, EPI_ISL_819773, EPI_ISL_819774, EPI_ISL_819775, EPI_ISL_819776, EPI_ISL_819778, EPI_ISL_819779, EPI_ISL_819780, EPI_ISL_819781, EPI_ISL_819782, EPI_ISL_819783, EPI_ISL_819784, EPI_ISL_819785, EPI_ISL_819786, EPI_ISL_819787, EPI_ISL_819788, EPI_ISL_819789, EPI_ISL_819790, EPI_ISL_819791, EPI_ISL_819792, EPI_ISL_819793, EPI_ISL_819794, EPI_ISL_819796, EPI_ISL_819797 |                                                                                                                   |                                                                            |                                                                                                                                                                                                                                                                                                                                                                                                                                                           |
| see above                                                                                                                                                                                                                                                                                                                                                                                                                                                                                                                                                                                                                                                                                                                                                                                                                                                                                      | Oxford Viromics, NDM, University of Oxford; Oxford University Hospitals; Basingstoke and North Hampshire Hospital | COVID-19 Genomics UK (COG-UK) Consortium                                   | Tanya Golubchik, David Bonsall, George Macintyre, Amy Trebes, Mariateresa de Cesare, Catrin Moore, Alex Mobbs, Anita Justice, Robert Shaw, Monique Andersson, Timothy Peto, Emma Wise, Nathan Moore, Jessica Lynch, Nick Cortes, Matilde Mori, Stephen Kidd, David Buck, John Todd, Christophe Fraser                                                                                                                                                     |
| EPI_ISL_819801                                                                                                                                                                                                                                                                                                                                                                                                                                                                                                                                                                                                                                                                                                                                                                                                                                                                                 | Queens Medical Centre, Clinical Microbiology Department / DeepSeq Nottingham                                      | COVID-19 Genomics UK (COG-UK) Consortium                                   | Gemma Clark, Wendy Smith, Manjinder Khakh, Vicki M Fleming, Michelle M Lister, Hannah Howson-Wells, Jonathan Ball, Patrick McClure, Joseph Chappell, Theocharis Tsoleridis, Nadine Holmes, Matthew Carlisle, Christopher Moore, Fei Sang, Johnny Debebe, Victoria Wright, Matthew Loose                                                                                                                                                                   |
| EPI_ISL_819803, EPI_ISL_819805, EPI_ISL_819806, EPI_ISL_819807, EPI_ISL_819808, EPI_ISL_819809, EPI_ISL_819810, EPI_ISL_819811, EPI_ISL_819812, EPI_ISL_819813, EPI_ISL_819814, EPI_ISL_819815, EPI_ISL_819816, EPI_ISL_819817, EPI_ISL_819818, EPI_ISL_819819, EPI_ISL_819820, EPI_ISL_819822, EPI_ISL_819823, EPI_ISL_819824, EPI_ISL_819825, EPI_ISL_819826, EPI_ISL_819827                                                                                                                                                                                                                                                                                                                                                                                                                                                                                                                 |                                                                                                                   |                                                                            |                                                                                                                                                                                                                                                                                                                                                                                                                                                           |
| see above                                                                                                                                                                                                                                                                                                                                                                                                                                                                                                                                                                                                                                                                                                                                                                                                                                                                                      | Oxford Viromics, NDM, University of Oxford; Oxford University Hospitals; Basingstoke and North Hampshire Hospital | COVID-19 Genomics UK (COG-UK) Consortium                                   | Tanya Golubchik, David Bonsall, George Macintyre, Amy Trebes, Mariateresa de Cesare, Catrin Moore, Alex Mobbs, Anita Justice, Robert Shaw, Monique Andersson, Timothy Peto, Emma Wise, Nathan Moore, Jessica Lynch, Nick Cortes, Matilde Mori, Stephen Kidd, David Buck, John Todd, Christophe Fraser                                                                                                                                                     |
| EPI_ISL_819830, EPI_ISL_819832                                                                                                                                                                                                                                                                                                                                                                                                                                                                                                                                                                                                                                                                                                                                                                                                                                                                 | Queens Medical Centre, Clinical Microbiology Department / DeepSeq Nottingham                                      | COVID-19 Genomics UK (COG-UK) Consortium                                   | Gemma Clark, Wendy Smith, Manjinder Khakh, Vicki M Fleming, Michelle M Lister, Hannah Howson-Wells, Jonathan Ball, Patrick McClure, Joseph Chappell, Theocharis Tsoleridis, Nadine Holmes, Matthew Carlisle, Christopher Moore, Fei Sang, Johnny Debebe, Victoria Wright, Matthew Loose                                                                                                                                                                   |
| EPI_ISL_819835, EPI_ISL_819836, EPI_ISL_819837, EPI_ISL_819838, EPI_ISL_819839, EPI_ISL_819840, EPI_ISL_819841, EPI_ISL_819842, EPI_ISL_819843, EPI_ISL_819844, EPI_ISL_819845, EPI_ISL_819846, EPI_ISL_819847, EPI_ISL_819848, EPI_ISL_819849, EPI_ISL_819850, EPI_ISL_819852, EPI_ISL_819853, EPI_ISL_819854, EPI_ISL_819855, EPI_ISL_819856, EPI_ISL_819857, EPI_ISL_819858, EPI_ISL_819859, EPI_ISL_819860, EPI_ISL_819861, EPI_ISL_819862, EPI_ISL_819863, EPI_ISL_819866, EPI_ISL_819868, EPI_ISL_819869, EPI_ISL_819870, EPI_ISL_819871, EPI_ISL_819872                                                                                                                                                                                                                                                                                                                                 |                                                                                                                   |                                                                            |                                                                                                                                                                                                                                                                                                                                                                                                                                                           |
| see above                                                                                                                                                                                                                                                                                                                                                                                                                                                                                                                                                                                                                                                                                                                                                                                                                                                                                      | Oxford Viromics, NDM, University of Oxford; Oxford University Hospitals; Basingstoke and North Hampshire Hospital | COVID-19 Genomics UK (COG-UK) Consortium                                   | Tanya Golubchik, David Bonsall, George Macintyre, Amy Trebes, Mariateresa de Cesare, Catrin Moore, Alex Mobbs, Anita Justice, Robert Shaw, Monique Andersson, Timothy Peto, Emma Wise, Nathan Moore, Jessica Lynch, Nick Cortes, Matilde Mori, Stephen Kidd, David Buck, John Todd, Christophe Fraser                                                                                                                                                     |
| EPI_ISL_819900, EPI_ISL_819901, EPI_ISL_819934, EPI_ISL_819971, EPI_ISL_819976, EPI_ISL_820004, EPI_ISL_820005                                                                                                                                                                                                                                                                                                                                                                                                                                                                                                                                                                                                                                                                                                                                                                                 | Quadram Institute Bioscience                                                                                      | COVID-19 Genomics UK (COG-UK) Consortium                                   | Dave J. Baker, Gemma L. Kay, Alp Aydin, Thanh Le-Viet, Steven Rudder, Ana P. Tedim, Anastasia Kolyva, Maria Diaz, Leonardo de Oliveira Martins, Nabil-Fareed Alikhan, Lizzie Meadows, Rachael Stanley, Ngozi Elumogo, Muhammed Yasir, Nicholas M. Thomson, Alexander J Trotter, Rachel Gilroy, Samuel Bloomfield, Claire Stuart, Andrew Bell, Reenesh Prakash, Samir Dervisevic, Alison E. Mather, John Wain, Mark Webber, Andrew J. Page, Justin O'Grady |
| EPI_ISL_820006                                                                                                                                                                                                                                                                                                                                                                                                                                                                                                                                                                                                                                                                                                                                                                                                                                                                                 | Queens Medical Centre, Clinical Microbiology Department / DeepSeq Nottingham                                      | COVID-19 Genomics UK (COG-UK) Consortium                                   | Gemma Clark, Wendy Smith, Manjinder Khakh, Vicki M Fleming, Michelle M Lister, Hannah Howson-Wells, Jonathan Ball, Patrick McClure, Joseph Chappell, Theocharis Tsoleridis, Nadine Holmes, Matthew Carlisle, Christopher Moore, Fei Sang, Johnny Debebe, Victoria Wright, Matthew Loose                                                                                                                                                                   |
| EPI_ISL_820021, EPI_ISL_820026, EPI_ISL_820044, EPI_ISL_820072                                                                                                                                                                                                                                                                                                                                                                                                                                                                                                                                                                                                                                                                                                                                                                                                                                 | Quadram Institute Bioscience                                                                                      | COVID-19 Genomics UK (COG-UK) Consortium                                   | Dave J. Baker, Gemma L. Kay, Alp Aydin, Thanh Le-Viet, Steven Rudder, Ana P. Tedim, Anastasia Kolyva, Maria Diaz, Leonardo de Oliveira Martins, Nabil-Fareed Alikhan, Lizzie Meadows, Rachael Stanley, Ngozi Elumogo, Muhammed Yasir, Nicholas M. Thomson, Alexander J Trotter, Rachel Gilroy, Samuel Bloomfield, Claire Stuart, Andrew Bell, Reenesh Prakash, Samir Dervisevic, Alison E. Mather, John Wain, Mark Webber, Andrew J. Page, Justin O'Grady |
| EPI_ISL_820129, EPI_ISL_820132, EPI_ISL_820137, EPI_ISL_820140, EPI_ISL_820143, EPI_ISL_820145                                                                                                                                                                                                                                                                                                                                                                                                                                                                                                                                                                                                                                                                                                                                                                                                 | Lighthouse Lab in Alderley Park                                                                                   | Wellcome Sanger Institute for the COVID-19 Genomics UK (COG-UK) Consortium | Jacquelyn Wynn, Mairead Hyland, The Lighthouse Lab in Alderley Park and Alex Alderton, Roberto Amato, Sonia Goncalves, Ewan Harrison, David K. Jackson, Ian Johnston, Dominic Kwiatkowski, Cordelia Langford, John Sillitoe on behalf of the Wellcome Sanger Institute COVID-19 Surveillance Team                                                                                                                                                         |
| EPI_ISL_820147, EPI_ISL_820152                                                                                                                                                                                                                                                                                                                                                                                                                                                                                                                                                                                                                                                                                                                                                                                                                                                                 | Lighthouse Lab in Glasgow                                                                                         | Wellcome Sanger Institute for the COVID-19 Genomics UK (COG-UK) Consortium | Harper VanSteenhouse, Yumi Kasai, David Gray, Carol Clugston, Anna Dominiczak and Alex Alderton, Roberto Amato, Sonia Goncalves, Ewan Harrison, David K. Jackson, Ian Johnston, Dominic Kwiatkowski, Cordelia Langford, John Sillitoe on behalf of the Wellcome Sanger Institute COVID-19 Surveillance Team                                                                                                                                               |
| EPI_ISL_820155, EPI_ISL_820160, EPI_ISL_820162, EPI_ISL_820163                                                                                                                                                                                                                                                                                                                                                                                                                                                                                                                                                                                                                                                                                                                                                                                                                                 | Lighthouse Lab in Alderley Park                                                                                   | Wellcome Sanger Institute for the COVID-19 Genomics UK (COG-UK) Consortium | Jacquelyn Wynn, Mairead Hyland, The Lighthouse Lab in Alderley Park and Alex Alderton, Roberto Amato, Sonia Goncalves, Ewan Harrison, David K. Jackson, Ian Johnston, Dominic Kwiatkowski, Cordelia Langford, John Sillitoe on behalf of the Wellcome Sanger Institute COVID-19 Surveillance Team                                                                                                                                                         |
| EPI_ISL_820164                                                                                                                                                                                                                                                                                                                                                                                                                                                                                                                                                                                                                                                                                                                                                                                                                                                                                 | Quadram Institute Bioscience                                                                                      | COVID-19 Genomics UK (COG-UK) Consortium                                   | Dave J. Baker, Gemma L. Kay, Alp Aydin, Thanh Le-Viet, Steven Rudder, Ana P. Tedim, Anastasia Kolyva, Maria Diaz, Leonardo de Oliveira Martins, Nabil-Fareed Alikhan, Lizzie Meadows, Rachael Stanley, Ngozi Elumogo, Muhammed Yasir, Nicholas M. Thomson, Alexander J Trotter, Rachel Gilroy, Samuel Bloomfield, Claire Stuart, Andrew Bell, Reenesh Prakash, Samir Dervisevic, Alison E. Mather, John Wain, Mark Webber, Andrew J. Page, Justin O'Grady |
| EPI_ISL_820166                                                                                                                                                                                                                                                                                                                                                                                                                                                                                                                                                                                                                                                                                                                                                                                                                                                                                 | Lighthouse Lab in Alderley Park                                                                                   | Wellcome Sanger Institute for the COVID-19 Genomics UK (COG-UK) Consortium | Jacquelyn Wynn, Mairead Hyland, The Lighthouse Lab in Alderley Park and Alex Alderton, Roberto Amato, Sonia Goncalves, Ewan Harrison, David K. Jackson, Ian Johnston, Dominic Kwiatkowski, Cordelia Langford, John Sillitoe on behalf of the Wellcome Sanger Institute COVID-19 Surveillance Team                                                                                                                                                         |
| EPI_ISL_820167                                                                                                                                                                                                                                                                                                                                                                                                                                                                                                                                                                                                                                                                                                                                                                                                                                                                                 | Quadram Institute Bioscience                                                                                      | COVID-19 Genomics UK (COG-UK) Consortium                                   | Dave J. Baker, Gemma L. Kay, Alp Aydin, Thanh Le-Viet, Steven Rudder, Ana P. Tedim, Anastasia Kolyva, Maria Diaz, Leonardo de Oliveira Martins, Nabil-Fareed Alikhan, Lizzie Meadows, Rachael Stanley, Ngozi Elumogo, Muhammed Yasir, Nicholas M. Thomson, Alexander J Trotter, Rachel Gilroy, Samuel Bloomfield, Claire Stuart, Andrew Bell, Reenesh Prakash, Samir Dervisevic, Alison E. Mather, John Wain, Mark Webber, Andrew J. Page, Justin O'Grady |
| EPI_ISL_820168, EPI_ISL_820170                                                                                                                                                                                                                                                                                                                                                                                                                                                                                                                                                                                                                                                                                                                                                                                                                                                                 | Lighthouse Lab in Alderley Park                                                                                   | Wellcome Sanger Institute for the COVID-19 Genomics UK (COG-UK) Consortium | Jacquelyn Wynn, Mairead Hyland, The Lighthouse Lab in Alderley Park and Alex Alderton, Roberto Amato, Sonia Goncalves, Ewan Harrison, David K. Jackson, Ian Johnston, Dominic Kwiatkowski, Cordelia Langford, John Sillitoe on behalf of the Wellcome Sanger Institute COVID-19 Surveillance Team                                                                                                                                                         |
| EPI_ISL_820171                                                                                                                                                                                                                                                                                                                                                                                                                                                                                                                                                                                                                                                                                                                                                                                                                                                                                 | Lighthouse Lab in Glasgow                                                                                         | Wellcome Sanger Institute for the COVID-19 Genomics UK (COG-UK) Consortium | Harper VanSteenhouse, Yumi Kasai, David Gray, Carol Clugston, Anna Dominiczak and Alex Alderton, Roberto Amato, Sonia Goncalves, Ewan Harrison, David K. Jackson, Ian Johnston, Dominic Kwiatkowski, Cordelia Langford, John Sillitoe on behalf of the Wellcome Sanger Institute COVID-19 Surveillance Team                                                                                                                                               |
| EPI_ISL_820172                                                                                                                                                                                                                                                                                                                                                                                                                                                                                                                                                                                                                                                                                                                                                                                                                                                                                 | Quadram Institute Bioscience                                                                                      | COVID-19 Genomics UK (COG-UK) Consortium                                   | Dave J. Baker, Gemma L. Kay, Alp Aydin, Thanh Le-Viet, Steven Rudder, Ana P. Tedim, Anastasia Kolyva, Maria Diaz, Leonardo de Oliveira Martins, Nabil-Fareed Alikhan, Lizzie Meadows, Rachael Stanley, Ngozi Elumogo, Muhammed Yasir, Nicholas M. Thomson, Alexander J Trotter, Rachel Gilroy, Samuel Bloomfield, Claire Stuart, Andrew Bell, Reenesh Prakash, Samir Dervisevic, Alison E. Mather, John Wain, Mark Webber, Andrew J. Page, Justin O'Grady |
| EPI_ISL_820174                                                                                                                                                                                                                                                                                                                                                                                                                                                                                                                                                                                                                                                                                                                                                                                                                                                                                 | Lighthouse Lab in Alderley Park                                                                                   | Wellcome Sanger Institute for the COVID-19 Genomics UK (COG-UK) Consortium | Jacquelyn Wynn, Mairead Hyland, The Lighthouse Lab in Alderley Park and Alex Alderton, Roberto Amato, Sonia Goncalves, Ewan Harrison, David K. Jackson, Ian Johnston, Dominic Kwiatkowski, Cordelia Langford, John Sillitoe on behalf of the Wellcome Sanger Institute COVID-19 Surveillance Team                                                                                                                                                         |
| EPI_ISL_820175                                                                                                                                                                                                                                                                                                                                                                                                                                                                                                                                                                                                                                                                                                                                                                                                                                                                                 | Quadram Institute Bioscience                                                                                      | COVID-19 Genomics UK (COG-UK) Consortium                                   | Dave J. Baker, Gemma L. Kay, Alp Aydin, Thanh Le-Viet, Steven Rudder, Ana P. Tedim, Anastasia Kolyva, Maria Diaz, Leonardo de Oliveira Martins, Nabil-Fareed Alikhan, Lizzie Meadows, Rachael Stanley, Ngozi Elumogo, Muhammed Yasir, Nicholas M. Thomson, Alexander J Trotter, Rachel Gilroy,                                                                                                                                                            |





[illegible]



[illegible]

|                                                                                                                                                                                                                                                                                                                                                                                                                                                                                                                                                                                                                                                                                                                                                                                                                                                                                                                                                                                                                                                                                                                                                                                                                                                                                                                                                                                                                                                                                                                                                                                                                                                                                                                                                                                                                                                                                                                                                                                                                                                                                                                                                                                                                                                                                                                                                                                                                                                                                                                                                                                                                                                                                                                                                                                                                                                                                                                                                                                                                                                                                                                                                                                                                                                                                                                                                                                                                                                                                                                                                                                                                                                                                                                                                                                                                                                                                                                                                                                                                                                                                                |                                                                         |                                                                            |                                                                                                                                                                                                                                                                                                                                                                         |
|------------------------------------------------------------------------------------------------------------------------------------------------------------------------------------------------------------------------------------------------------------------------------------------------------------------------------------------------------------------------------------------------------------------------------------------------------------------------------------------------------------------------------------------------------------------------------------------------------------------------------------------------------------------------------------------------------------------------------------------------------------------------------------------------------------------------------------------------------------------------------------------------------------------------------------------------------------------------------------------------------------------------------------------------------------------------------------------------------------------------------------------------------------------------------------------------------------------------------------------------------------------------------------------------------------------------------------------------------------------------------------------------------------------------------------------------------------------------------------------------------------------------------------------------------------------------------------------------------------------------------------------------------------------------------------------------------------------------------------------------------------------------------------------------------------------------------------------------------------------------------------------------------------------------------------------------------------------------------------------------------------------------------------------------------------------------------------------------------------------------------------------------------------------------------------------------------------------------------------------------------------------------------------------------------------------------------------------------------------------------------------------------------------------------------------------------------------------------------------------------------------------------------------------------------------------------------------------------------------------------------------------------------------------------------------------------------------------------------------------------------------------------------------------------------------------------------------------------------------------------------------------------------------------------------------------------------------------------------------------------------------------------------------------------------------------------------------------------------------------------------------------------------------------------------------------------------------------------------------------------------------------------------------------------------------------------------------------------------------------------------------------------------------------------------------------------------------------------------------------------------------------------------------------------------------------------------------------------------------------------------------------------------------------------------------------------------------------------------------------------------------------------------------------------------------------------------------------------------------------------------------------------------------------------------------------------------------------------------------------------------------------------------------------------------------------------------------------------|-------------------------------------------------------------------------|----------------------------------------------------------------------------|-------------------------------------------------------------------------------------------------------------------------------------------------------------------------------------------------------------------------------------------------------------------------------------------------------------------------------------------------------------------------|
| EPI_ISL_821617                                                                                                                                                                                                                                                                                                                                                                                                                                                                                                                                                                                                                                                                                                                                                                                                                                                                                                                                                                                                                                                                                                                                                                                                                                                                                                                                                                                                                                                                                                                                                                                                                                                                                                                                                                                                                                                                                                                                                                                                                                                                                                                                                                                                                                                                                                                                                                                                                                                                                                                                                                                                                                                                                                                                                                                                                                                                                                                                                                                                                                                                                                                                                                                                                                                                                                                                                                                                                                                                                                                                                                                                                                                                                                                                                                                                                                                                                                                                                                                                                                                                                 | Lighthouse Lab in Alderley Park                                         | Wellcome Sanger Institute for the COVID-19 Genomics UK (COG-UK) Consortium | Jacquelyn Wynn, Mairead Hyland, The Lighthouse Lab in Alderley Park and Alex Alderton, Roberto Amato, Sonia Goncalves, Ewan Harrison, David K. Jackson, Ian Johnston, Dominic Kwiatkowski, Cordelia Langford, John Sillitoe on behalf of the Wellcome Sanger Institute COVID-19 Surveillance Team                                                                       |
| EPI_ISL_821619, EPI_ISL_821629, EPI_ISL_821631, EPI_ISL_821632, EPI_ISL_821634, EPI_ISL_821635, EPI_ISL_821636, EPI_ISL_821637, EPI_ISL_821638, EPI_ISL_821641, EPI_ISL_821642, EPI_ISL_821643, EPI_ISL_821644, EPI_ISL_821645, EPI_ISL_821646, EPI_ISL_821647, EPI_ISL_821651, EPI_ISL_821652, EPI_ISL_821653, EPI_ISL_821655, EPI_ISL_821657, EPI_ISL_821658                                                                                                                                                                                                                                                                                                                                                                                                                                                                                                                                                                                                                                                                                                                                                                                                                                                                                                                                                                                                                                                                                                                                                                                                                                                                                                                                                                                                                                                                                                                                                                                                                                                                                                                                                                                                                                                                                                                                                                                                                                                                                                                                                                                                                                                                                                                                                                                                                                                                                                                                                                                                                                                                                                                                                                                                                                                                                                                                                                                                                                                                                                                                                                                                                                                                                                                                                                                                                                                                                                                                                                                                                                                                                                                                 |                                                                         |                                                                            |                                                                                                                                                                                                                                                                                                                                                                         |
| see above                                                                                                                                                                                                                                                                                                                                                                                                                                                                                                                                                                                                                                                                                                                                                                                                                                                                                                                                                                                                                                                                                                                                                                                                                                                                                                                                                                                                                                                                                                                                                                                                                                                                                                                                                                                                                                                                                                                                                                                                                                                                                                                                                                                                                                                                                                                                                                                                                                                                                                                                                                                                                                                                                                                                                                                                                                                                                                                                                                                                                                                                                                                                                                                                                                                                                                                                                                                                                                                                                                                                                                                                                                                                                                                                                                                                                                                                                                                                                                                                                                                                                      | Lighthouse Lab in Milton Keynes                                         | Wellcome Sanger Institute for the COVID-19 Genomics UK (COG-UK) Consortium | The Lighthouse Lab in Milton Keynes and Alex Alderton, Roberto Amato, Sonia Goncalves, Ewan Harrison, David K. Jackson, Ian Johnston, Dominic Kwiatkowski, Cordelia Langford, John Sillitoe on behalf of the Wellcome Sanger Institute COVID-19 Surveillance Team                                                                                                       |
| EPI_ISL_821662, EPI_ISL_821663, EPI_ISL_821665, EPI_ISL_821670, EPI_ISL_821673, EPI_ISL_821679, EPI_ISL_821680, EPI_ISL_821681, EPI_ISL_821682, EPI_ISL_821683, EPI_ISL_821685, EPI_ISL_821690, EPI_ISL_821691, EPI_ISL_821692, EPI_ISL_821694, EPI_ISL_821695, EPI_ISL_821696, EPI_ISL_821697, EPI_ISL_821699, EPI_ISL_821703, EPI_ISL_821704, EPI_ISL_821706, EPI_ISL_821712, EPI_ISL_821714, EPI_ISL_821715, EPI_ISL_821717, EPI_ISL_821719, EPI_ISL_821722, EPI_ISL_821728, EPI_ISL_821732, EPI_ISL_821736, EPI_ISL_821738, EPI_ISL_821739, EPI_ISL_821740, EPI_ISL_821744, EPI_ISL_821748, EPI_ISL_821749, EPI_ISL_821750, EPI_ISL_821753, EPI_ISL_821754, EPI_ISL_821757, EPI_ISL_821759, EPI_ISL_821760, EPI_ISL_821762, EPI_ISL_821763, EPI_ISL_821764, EPI_ISL_821766, EPI_ISL_821771, EPI_ISL_821772, EPI_ISL_821778, EPI_ISL_821783, EPI_ISL_821785, EPI_ISL_821788, EPI_ISL_821790, EPI_ISL_821791, EPI_ISL_821795, EPI_ISL_821796, EPI_ISL_821798, EPI_ISL_821800, EPI_ISL_821808, EPI_ISL_821809, EPI_ISL_821813, EPI_ISL_821814, EPI_ISL_821821, EPI_ISL_821822, EPI_ISL_821824, EPI_ISL_821825, EPI_ISL_821826, EPI_ISL_821830, EPI_ISL_821832, EPI_ISL_821835, EPI_ISL_821837, EPI_ISL_821840, EPI_ISL_821843, EPI_ISL_821844, EPI_ISL_821846, EPI_ISL_821849, EPI_ISL_821850, EPI_ISL_821851, EPI_ISL_821855, EPI_ISL_821856, EPI_ISL_821857, EPI_ISL_821863, EPI_ISL_821864, EPI_ISL_821866, EPI_ISL_821869, EPI_ISL_821870, EPI_ISL_821877, EPI_ISL_821879, EPI_ISL_821880, EPI_ISL_821881, EPI_ISL_821883, EPI_ISL_821894, EPI_ISL_821900, EPI_ISL_821901, EPI_ISL_821904, EPI_ISL_821906, EPI_ISL_821907, EPI_ISL_821909, EPI_ISL_821913, EPI_ISL_821914, EPI_ISL_821916, EPI_ISL_821921, EPI_ISL_821922, EPI_ISL_821924, EPI_ISL_821925, EPI_ISL_821927, EPI_ISL_821928, EPI_ISL_821930, EPI_ISL_821936, EPI_ISL_821938, EPI_ISL_821940, EPI_ISL_821941, EPI_ISL_821945, EPI_ISL_821946, EPI_ISL_821947, EPI_ISL_821948, EPI_ISL_821951, EPI_ISL_821953, EPI_ISL_821954, EPI_ISL_821957, EPI_ISL_821958, EPI_ISL_821965, EPI_ISL_821968, EPI_ISL_821970                                                                                                                                                                                                                                                                                                                                                                                                                                                                                                                                                                                                                                                                                                                                                                                                                                                                                                                                                                                                                                                                                                                                                                                                                                                                                                                                                                                                                                                                                                                                                                                                                                                                                                                                                                                                                                                                                                                                                                                                                 |                                                                         |                                                                            |                                                                                                                                                                                                                                                                                                                                                                         |
| see above                                                                                                                                                                                                                                                                                                                                                                                                                                                                                                                                                                                                                                                                                                                                                                                                                                                                                                                                                                                                                                                                                                                                                                                                                                                                                                                                                                                                                                                                                                                                                                                                                                                                                                                                                                                                                                                                                                                                                                                                                                                                                                                                                                                                                                                                                                                                                                                                                                                                                                                                                                                                                                                                                                                                                                                                                                                                                                                                                                                                                                                                                                                                                                                                                                                                                                                                                                                                                                                                                                                                                                                                                                                                                                                                                                                                                                                                                                                                                                                                                                                                                      | Lighthouse Lab in Cambridge                                             | Wellcome Sanger Institute for the COVID-19 Genomics UK (COG-UK) Consortium | Rob Howes, The Lighthouse Lab in Cambridge and Alex Alderton, Roberto Amato, Sonia Goncalves, Ewan Harrison, David K. Jackson, Ian Johnston, Dominic Kwiatkowski, Cordelia Langford, John Sillitoe on behalf of the Wellcome Sanger Institute COVID-19 Surveillance Team                                                                                                |
| EPI_ISL_821971, EPI_ISL_821977, EPI_ISL_821978, EPI_ISL_821979, EPI_ISL_821980, EPI_ISL_821986, EPI_ISL_821990, EPI_ISL_821998, EPI_ISL_821999, EPI_ISL_822000, EPI_ISL_822002, EPI_ISL_822008, EPI_ISL_822010, EPI_ISL_822012, EPI_ISL_822014, EPI_ISL_822015, EPI_ISL_822017, EPI_ISL_822018, EPI_ISL_822020, EPI_ISL_822021, EPI_ISL_822024, EPI_ISL_822025, EPI_ISL_822027, EPI_ISL_822028, EPI_ISL_822032, EPI_ISL_822038, EPI_ISL_822039, EPI_ISL_822045, EPI_ISL_822046, EPI_ISL_822050, EPI_ISL_822056, EPI_ISL_822062, EPI_ISL_822068, EPI_ISL_822071, EPI_ISL_822073, EPI_ISL_822074, EPI_ISL_822076, EPI_ISL_822077, EPI_ISL_822082, EPI_ISL_822082, EPI_ISL_822085, EPI_ISL_822088, EPI_ISL_822089, EPI_ISL_822090, EPI_ISL_822092, EPI_ISL_822102, EPI_ISL_822106, EPI_ISL_822108, EPI_ISL_822116, EPI_ISL_822118, EPI_ISL_822125, EPI_ISL_822126, EPI_ISL_822128, EPI_ISL_822131, EPI_ISL_822136, EPI_ISL_822138, EPI_ISL_822143, EPI_ISL_822144, EPI_ISL_822149, EPI_ISL_822152, EPI_ISL_822157, EPI_ISL_822161, EPI_ISL_822162, EPI_ISL_822166, EPI_ISL_822167, EPI_ISL_822168, EPI_ISL_822171, EPI_ISL_822172, EPI_ISL_822174, EPI_ISL_822175, EPI_ISL_822177, EPI_ISL_822180, EPI_ISL_822181, EPI_ISL_822185, EPI_ISL_822186, EPI_ISL_822187, EPI_ISL_822189, EPI_ISL_822192, EPI_ISL_822194, EPI_ISL_822198, EPI_ISL_822200, EPI_ISL_822203, EPI_ISL_822204, EPI_ISL_822205, EPI_ISL_822206, EPI_ISL_822207, EPI_ISL_822208, EPI_ISL_822210, EPI_ISL_822212, EPI_ISL_822215, EPI_ISL_822216, EPI_ISL_822219, EPI_ISL_822220, EPI_ISL_822222, EPI_ISL_822226, EPI_ISL_822227, EPI_ISL_822231, EPI_ISL_822234, EPI_ISL_822235, EPI_ISL_822238, EPI_ISL_822246, EPI_ISL_822254, EPI_ISL_822258, EPI_ISL_822259, EPI_ISL_822261, EPI_ISL_822262, EPI_ISL_822270, EPI_ISL_822271, EPI_ISL_822277, EPI_ISL_822287, EPI_ISL_822289, EPI_ISL_822290, EPI_ISL_822294                                                                                                                                                                                                                                                                                                                                                                                                                                                                                                                                                                                                                                                                                                                                                                                                                                                                                                                                                                                                                                                                                                                                                                                                                                                                                                                                                                                                                                                                                                                                                                                                                                                                                                                                                                                                                                                                                                                                                                                                                                                                                                                                                                                                                 |                                                                         |                                                                            |                                                                                                                                                                                                                                                                                                                                                                         |
| see above                                                                                                                                                                                                                                                                                                                                                                                                                                                                                                                                                                                                                                                                                                                                                                                                                                                                                                                                                                                                                                                                                                                                                                                                                                                                                                                                                                                                                                                                                                                                                                                                                                                                                                                                                                                                                                                                                                                                                                                                                                                                                                                                                                                                                                                                                                                                                                                                                                                                                                                                                                                                                                                                                                                                                                                                                                                                                                                                                                                                                                                                                                                                                                                                                                                                                                                                                                                                                                                                                                                                                                                                                                                                                                                                                                                                                                                                                                                                                                                                                                                                                      | Lighthouse Lab in Alderley Park                                         | Wellcome Sanger Institute for the COVID-19 Genomics UK (COG-UK) Consortium | Jacquelyn Wynn, Mairead Hyland, The Lighthouse Lab in Alderley Park and Alex Alderton, Roberto Amato, Sonia Goncalves, Ewan Harrison, David K. Jackson, Ian Johnston, Dominic Kwiatkowski, Cordelia Langford, John Sillitoe on behalf of the Wellcome Sanger Institute COVID-19 Surveillance Team                                                                       |
| EPI_ISL_822295                                                                                                                                                                                                                                                                                                                                                                                                                                                                                                                                                                                                                                                                                                                                                                                                                                                                                                                                                                                                                                                                                                                                                                                                                                                                                                                                                                                                                                                                                                                                                                                                                                                                                                                                                                                                                                                                                                                                                                                                                                                                                                                                                                                                                                                                                                                                                                                                                                                                                                                                                                                                                                                                                                                                                                                                                                                                                                                                                                                                                                                                                                                                                                                                                                                                                                                                                                                                                                                                                                                                                                                                                                                                                                                                                                                                                                                                                                                                                                                                                                                                                 | Lighthouse Lab in Glasgow                                               | Wellcome Sanger Institute for the COVID-19 Genomics UK (COG-UK) Consortium | Harper VanSteenhouse, Yumi Kasai, David Gray, Carol Clugston, Anna Dominiczak and Alex Alderton, Roberto Amato, Sonia Goncalves, Ewan Harrison, David K. Jackson, Ian Johnston, Dominic Kwiatkowski, Cordelia Langford, John Sillitoe on behalf of the Wellcome Sanger Institute COVID-19 Surveillance Team                                                             |
| EPI_ISL_822299                                                                                                                                                                                                                                                                                                                                                                                                                                                                                                                                                                                                                                                                                                                                                                                                                                                                                                                                                                                                                                                                                                                                                                                                                                                                                                                                                                                                                                                                                                                                                                                                                                                                                                                                                                                                                                                                                                                                                                                                                                                                                                                                                                                                                                                                                                                                                                                                                                                                                                                                                                                                                                                                                                                                                                                                                                                                                                                                                                                                                                                                                                                                                                                                                                                                                                                                                                                                                                                                                                                                                                                                                                                                                                                                                                                                                                                                                                                                                                                                                                                                                 | Lighthouse Lab in Cambridge                                             | Wellcome Sanger Institute for the COVID-19 Genomics UK (COG-UK) Consortium | Rob Howes, The Lighthouse Lab in Cambridge and Alex Alderton, Roberto Amato, Sonia Goncalves, Ewan Harrison, David K. Jackson, Ian Johnston, Dominic Kwiatkowski, Cordelia Langford, John Sillitoe on behalf of the Wellcome Sanger Institute COVID-19 Surveillance Team                                                                                                |
| EPI_ISL_822300                                                                                                                                                                                                                                                                                                                                                                                                                                                                                                                                                                                                                                                                                                                                                                                                                                                                                                                                                                                                                                                                                                                                                                                                                                                                                                                                                                                                                                                                                                                                                                                                                                                                                                                                                                                                                                                                                                                                                                                                                                                                                                                                                                                                                                                                                                                                                                                                                                                                                                                                                                                                                                                                                                                                                                                                                                                                                                                                                                                                                                                                                                                                                                                                                                                                                                                                                                                                                                                                                                                                                                                                                                                                                                                                                                                                                                                                                                                                                                                                                                                                                 | Lighthouse Lab in Alderley Park                                         | Wellcome Sanger Institute for the COVID-19 Genomics UK (COG-UK) Consortium | Jacquelyn Wynn, Mairead Hyland, The Lighthouse Lab in Alderley Park and Alex Alderton, Roberto Amato, Sonia Goncalves, Ewan Harrison, David K. Jackson, Ian Johnston, Dominic Kwiatkowski, Cordelia Langford, John Sillitoe on behalf of the Wellcome Sanger Institute COVID-19 Surveillance Team                                                                       |
| EPI_ISL_822301                                                                                                                                                                                                                                                                                                                                                                                                                                                                                                                                                                                                                                                                                                                                                                                                                                                                                                                                                                                                                                                                                                                                                                                                                                                                                                                                                                                                                                                                                                                                                                                                                                                                                                                                                                                                                                                                                                                                                                                                                                                                                                                                                                                                                                                                                                                                                                                                                                                                                                                                                                                                                                                                                                                                                                                                                                                                                                                                                                                                                                                                                                                                                                                                                                                                                                                                                                                                                                                                                                                                                                                                                                                                                                                                                                                                                                                                                                                                                                                                                                                                                 | Lighthouse Lab in Cambridge                                             | Wellcome Sanger Institute for the COVID-19 Genomics UK (COG-UK) Consortium | Rob Howes, The Lighthouse Lab in Cambridge and Alex Alderton, Roberto Amato, Sonia Goncalves, Ewan Harrison, David K. Jackson, Ian Johnston, Dominic Kwiatkowski, Cordelia Langford, John Sillitoe on behalf of the Wellcome Sanger Institute COVID-19 Surveillance Team                                                                                                |
| EPI_ISL_822305                                                                                                                                                                                                                                                                                                                                                                                                                                                                                                                                                                                                                                                                                                                                                                                                                                                                                                                                                                                                                                                                                                                                                                                                                                                                                                                                                                                                                                                                                                                                                                                                                                                                                                                                                                                                                                                                                                                                                                                                                                                                                                                                                                                                                                                                                                                                                                                                                                                                                                                                                                                                                                                                                                                                                                                                                                                                                                                                                                                                                                                                                                                                                                                                                                                                                                                                                                                                                                                                                                                                                                                                                                                                                                                                                                                                                                                                                                                                                                                                                                                                                 | Lighthouse Lab in Milton Keynes                                         | Wellcome Sanger Institute for the COVID-19 Genomics UK (COG-UK) Consortium | The Lighthouse Lab in Milton Keynes and Alex Alderton, Roberto Amato, Sonia Goncalves, Ewan Harrison, David K. Jackson, Ian Johnston, Dominic Kwiatkowski, Cordelia Langford, John Sillitoe on behalf of the Wellcome Sanger Institute COVID-19 Surveillance Team                                                                                                       |
| EPI_ISL_822307                                                                                                                                                                                                                                                                                                                                                                                                                                                                                                                                                                                                                                                                                                                                                                                                                                                                                                                                                                                                                                                                                                                                                                                                                                                                                                                                                                                                                                                                                                                                                                                                                                                                                                                                                                                                                                                                                                                                                                                                                                                                                                                                                                                                                                                                                                                                                                                                                                                                                                                                                                                                                                                                                                                                                                                                                                                                                                                                                                                                                                                                                                                                                                                                                                                                                                                                                                                                                                                                                                                                                                                                                                                                                                                                                                                                                                                                                                                                                                                                                                                                                 | Lighthouse Lab in Glasgow                                               | Wellcome Sanger Institute for the COVID-19 Genomics UK (COG-UK) Consortium | Harper VanSteenhouse, Yumi Kasai, David Gray, Carol Clugston, Anna Dominiczak and Alex Alderton, Roberto Amato, Sonia Goncalves, Ewan Harrison, David K. Jackson, Ian Johnston, Dominic Kwiatkowski, Cordelia Langford, John Sillitoe on behalf of the Wellcome Sanger Institute COVID-19 Surveillance Team                                                             |
| EPI_ISL_822308                                                                                                                                                                                                                                                                                                                                                                                                                                                                                                                                                                                                                                                                                                                                                                                                                                                                                                                                                                                                                                                                                                                                                                                                                                                                                                                                                                                                                                                                                                                                                                                                                                                                                                                                                                                                                                                                                                                                                                                                                                                                                                                                                                                                                                                                                                                                                                                                                                                                                                                                                                                                                                                                                                                                                                                                                                                                                                                                                                                                                                                                                                                                                                                                                                                                                                                                                                                                                                                                                                                                                                                                                                                                                                                                                                                                                                                                                                                                                                                                                                                                                 | Lighthouse Lab in Alderley Park                                         | Wellcome Sanger Institute for the COVID-19 Genomics UK (COG-UK) Consortium | Jacquelyn Wynn, Mairead Hyland, The Lighthouse Lab in Alderley Park and Alex Alderton, Roberto Amato, Sonia Goncalves, Ewan Harrison, David K. Jackson, Ian Johnston, Dominic Kwiatkowski, Cordelia Langford, John Sillitoe on behalf of the Wellcome Sanger Institute COVID-19 Surveillance Team                                                                       |
| EPI_ISL_822347, EPI_ISL_822348, EPI_ISL_822349, EPI_ISL_822362, EPI_ISL_822364, EPI_ISL_822382, EPI_ISL_822405, EPI_ISL_822431, EPI_ISL_822433, EPI_ISL_822450, EPI_ISL_822521, EPI_ISL_822525, EPI_ISL_822527, EPI_ISL_822540, EPI_ISL_822550, EPI_ISL_822553, EPI_ISL_822572, EPI_ISL_822603, EPI_ISL_822604, EPI_ISL_822605, EPI_ISL_822608, EPI_ISL_822609, EPI_ISL_822626, EPI_ISL_822629, EPI_ISL_822633, EPI_ISL_822634, EPI_ISL_822648, EPI_ISL_822660, EPI_ISL_822666, EPI_ISL_822669, EPI_ISL_822671, EPI_ISL_822681, EPI_ISL_822699, EPI_ISL_822701, EPI_ISL_822705, EPI_ISL_822730, EPI_ISL_822731, EPI_ISL_822732, EPI_ISL_822745, EPI_ISL_822746, EPI_ISL_822748, EPI_ISL_822749, EPI_ISL_822752, EPI_ISL_822753, EPI_ISL_822757, EPI_ISL_822762, EPI_ISL_822766, EPI_ISL_822768, EPI_ISL_822769, EPI_ISL_822797, EPI_ISL_823026, EPI_ISL_823029, EPI_ISL_823030, EPI_ISL_823031, EPI_ISL_823032, EPI_ISL_823033, EPI_ISL_823034, EPI_ISL_823036, EPI_ISL_823038, EPI_ISL_823039, EPI_ISL_823041, EPI_ISL_823057, EPI_ISL_823058, EPI_ISL_823059, EPI_ISL_823060, EPI_ISL_823061, EPI_ISL_823062, EPI_ISL_823063, EPI_ISL_823068, EPI_ISL_823069, EPI_ISL_823072, EPI_ISL_823074, EPI_ISL_823076, EPI_ISL_823077, EPI_ISL_823082, EPI_ISL_823092, EPI_ISL_823095, EPI_ISL_823097, EPI_ISL_823099, EPI_ISL_823100, EPI_ISL_823111, EPI_ISL_823154, EPI_ISL_823164, EPI_ISL_823173, EPI_ISL_823181, EPI_ISL_823197, EPI_ISL_823219, EPI_ISL_823210, EPI_ISL_823217, EPI_ISL_823234, EPI_ISL_823241, EPI_ISL_823247, EPI_ISL_823254, EPI_ISL_823256, EPI_ISL_823257, EPI_ISL_823259, EPI_ISL_823261, EPI_ISL_823262, EPI_ISL_823263, EPI_ISL_823264, EPI_ISL_823269, EPI_ISL_823272, EPI_ISL_823275, EPI_ISL_823278, EPI_ISL_823299, EPI_ISL_823302, EPI_ISL_823317, EPI_ISL_823318, EPI_ISL_823321, EPI_ISL_823322, EPI_ISL_823327, EPI_ISL_823328, EPI_ISL_823329, EPI_ISL_823330, EPI_ISL_823334, EPI_ISL_823335, EPI_ISL_823338, EPI_ISL_823348, EPI_ISL_823349, EPI_ISL_823353, EPI_ISL_823354, EPI_ISL_823356, EPI_ISL_823358, EPI_ISL_823374, EPI_ISL_823375, EPI_ISL_823377, EPI_ISL_823378, EPI_ISL_823387, EPI_ISL_823388, EPI_ISL_823391, EPI_ISL_823392, EPI_ISL_823393, EPI_ISL_823395, EPI_ISL_823399, EPI_ISL_823404, EPI_ISL_823408, EPI_ISL_823412, EPI_ISL_823414, EPI_ISL_823417, EPI_ISL_823418, EPI_ISL_823421, EPI_ISL_823422, EPI_ISL_823428, EPI_ISL_823437, EPI_ISL_823438, EPI_ISL_823440, EPI_ISL_823446, EPI_ISL_823473, EPI_ISL_823500, EPI_ISL_823513, EPI_ISL_823515, EPI_ISL_823520, EPI_ISL_823523, EPI_ISL_823538, EPI_ISL_823552, EPI_ISL_823568, EPI_ISL_823569, EPI_ISL_823570, EPI_ISL_823571, EPI_ISL_823572, EPI_ISL_823574, EPI_ISL_823575, EPI_ISL_823576, EPI_ISL_823577, EPI_ISL_823579, EPI_ISL_823582, EPI_ISL_823584, EPI_ISL_823588, EPI_ISL_823589, EPI_ISL_823591, EPI_ISL_823594, EPI_ISL_823595, EPI_ISL_823596, EPI_ISL_823597, EPI_ISL_823598, EPI_ISL_823599, EPI_ISL_823600, EPI_ISL_823601, EPI_ISL_823602, EPI_ISL_823603, EPI_ISL_823604, EPI_ISL_823605, EPI_ISL_823607, EPI_ISL_823608, EPI_ISL_823611, EPI_ISL_823613, EPI_ISL_823614, EPI_ISL_823617, EPI_ISL_823618, EPI_ISL_823619, EPI_ISL_823621, EPI_ISL_823622, EPI_ISL_823623, EPI_ISL_823624, EPI_ISL_823626, EPI_ISL_823628, EPI_ISL_823631, EPI_ISL_823632, EPI_ISL_823633, EPI_ISL_823634, EPI_ISL_823635, EPI_ISL_823637, EPI_ISL_823640, EPI_ISL_823642, EPI_ISL_823645, EPI_ISL_823646, EPI_ISL_823647, EPI_ISL_823649, EPI_ISL_823650, EPI_ISL_823659, EPI_ISL_823698, EPI_ISL_823699, EPI_ISL_823701, EPI_ISL_823705, EPI_ISL_823706, EPI_ISL_823707, EPI_ISL_823709, EPI_ISL_823711, EPI_ISL_823717, EPI_ISL_823718, EPI_ISL_823719, EPI_ISL_823720, EPI_ISL_823721, EPI_ISL_823722, EPI_ISL_823728, EPI_ISL_823729, EPI_ISL_823732, EPI_ISL_823741, EPI_ISL_823742, EPI_ISL_823743, EPI_ISL_823753, EPI_ISL_823761, EPI_ISL_823765, EPI_ISL_823774, EPI_ISL_823775, EPI_ISL_823776, EPI_ISL_823777, EPI_ISL_823778, EPI_ISL_823779, EPI_ISL_823784, EPI_ISL_823785, EPI_ISL_823787, EPI_ISL_823788, EPI_ISL_823792, EPI_ISL_823794, EPI_ISL_823809 |                                                                         |                                                                            |                                                                                                                                                                                                                                                                                                                                                                         |
| see above                                                                                                                                                                                                                                                                                                                                                                                                                                                                                                                                                                                                                                                                                                                                                                                                                                                                                                                                                                                                                                                                                                                                                                                                                                                                                                                                                                                                                                                                                                                                                                                                                                                                                                                                                                                                                                                                                                                                                                                                                                                                                                                                                                                                                                                                                                                                                                                                                                                                                                                                                                                                                                                                                                                                                                                                                                                                                                                                                                                                                                                                                                                                                                                                                                                                                                                                                                                                                                                                                                                                                                                                                                                                                                                                                                                                                                                                                                                                                                                                                                                                                      | Wales Specialist Virology Centre Sequencing lab: Pathogen Genomics Unit | COVID-19 Genomics UK (COG-UK) Consortium                                   | Catherine Moore, Johnathan Evans, Laura Gifford, Malorie Perry, Simon Cottrell, Angela Marchbank, Alec Birchley, Alexander Adams, Amy Gaskin, Bree Gatica-Wilcox, Jason Coombes, Joel Southgate, Lauren Gilbert, Lee Graham, Nicole Pacchianni, Sara Kumziene-Summerhayes, Sarah Taylor, Sophie Jones, Sara Rey, Matthew Bull, Joanne Watkins, Sally Corden, Tom Connor |
| EPI_ISL_823813                                                                                                                                                                                                                                                                                                                                                                                                                                                                                                                                                                                                                                                                                                                                                                                                                                                                                                                                                                                                                                                                                                                                                                                                                                                                                                                                                                                                                                                                                                                                                                                                                                                                                                                                                                                                                                                                                                                                                                                                                                                                                                                                                                                                                                                                                                                                                                                                                                                                                                                                                                                                                                                                                                                                                                                                                                                                                                                                                                                                                                                                                                                                                                                                                                                                                                                                                                                                                                                                                                                                                                                                                                                                                                                                                                                                                                                                                                                                                                                                                                                                                 | DOHMH Jamaica                                                           | New York City Public Health Laboratory                                     | Jade Wang, et al.                                                                                                                                                                                                                                                                                                                                                       |
| EPI_ISL_823816                                                                                                                                                                                                                                                                                                                                                                                                                                                                                                                                                                                                                                                                                                                                                                                                                                                                                                                                                                                                                                                                                                                                                                                                                                                                                                                                                                                                                                                                                                                                                                                                                                                                                                                                                                                                                                                                                                                                                                                                                                                                                                                                                                                                                                                                                                                                                                                                                                                                                                                                                                                                                                                                                                                                                                                                                                                                                                                                                                                                                                                                                                                                                                                                                                                                                                                                                                                                                                                                                                                                                                                                                                                                                                                                                                                                                                                                                                                                                                                                                                                                                 | DOHMH Chelsea                                                           | New York City Public Health Laboratory                                     | Jade Wang, et al.                                                                                                                                                                                                                                                                                                                                                       |
| EPI_ISL_823817, EPI_ISL_823818, EPI_ISL_823819                                                                                                                                                                                                                                                                                                                                                                                                                                                                                                                                                                                                                                                                                                                                                                                                                                                                                                                                                                                                                                                                                                                                                                                                                                                                                                                                                                                                                                                                                                                                                                                                                                                                                                                                                                                                                                                                                                                                                                                                                                                                                                                                                                                                                                                                                                                                                                                                                                                                                                                                                                                                                                                                                                                                                                                                                                                                                                                                                                                                                                                                                                                                                                                                                                                                                                                                                                                                                                                                                                                                                                                                                                                                                                                                                                                                                                                                                                                                                                                                                                                 | DOHMH Corona                                                            | New York City Public Health Laboratory                                     | Jade Wang, et al.                                                                                                                                                                                                                                                                                                                                                       |
| EPI_ISL_823824                                                                                                                                                                                                                                                                                                                                                                                                                                                                                                                                                                                                                                                                                                                                                                                                                                                                                                                                                                                                                                                                                                                                                                                                                                                                                                                                                                                                                                                                                                                                                                                                                                                                                                                                                                                                                                                                                                                                                                                                                                                                                                                                                                                                                                                                                                                                                                                                                                                                                                                                                                                                                                                                                                                                                                                                                                                                                                                                                                                                                                                                                                                                                                                                                                                                                                                                                                                                                                                                                                                                                                                                                                                                                                                                                                                                                                                                                                                                                                                                                                                                                 | DOHMH Riverside                                                         | New York City Public Health Laboratory                                     | Jade Wang, et al.                                                                                                                                                                                                                                                                                                                                                       |
| EPI_ISL_823827                                                                                                                                                                                                                                                                                                                                                                                                                                                                                                                                                                                                                                                                                                                                                                                                                                                                                                                                                                                                                                                                                                                                                                                                                                                                                                                                                                                                                                                                                                                                                                                                                                                                                                                                                                                                                                                                                                                                                                                                                                                                                                                                                                                                                                                                                                                                                                                                                                                                                                                                                                                                                                                                                                                                                                                                                                                                                                                                                                                                                                                                                                                                                                                                                                                                                                                                                                                                                                                                                                                                                                                                                                                                                                                                                                                                                                                                                                                                                                                                                                                                                 | DOHMH Corona                                                            | New York City Public Health Laboratory                                     | Jade Wang, et al.                                                                                                                                                                                                                                                                                                                                                       |
| EPI_ISL_823830                                                                                                                                                                                                                                                                                                                                                                                                                                                                                                                                                                                                                                                                                                                                                                                                                                                                                                                                                                                                                                                                                                                                                                                                                                                                                                                                                                                                                                                                                                                                                                                                                                                                                                                                                                                                                                                                                                                                                                                                                                                                                                                                                                                                                                                                                                                                                                                                                                                                                                                                                                                                                                                                                                                                                                                                                                                                                                                                                                                                                                                                                                                                                                                                                                                                                                                                                                                                                                                                                                                                                                                                                                                                                                                                                                                                                                                                                                                                                                                                                                                                                 | DOHMH Morrisania                                                        | New York City Public Health Laboratory                                     | Jade Wang, et al.                                                                                                                                                                                                                                                                                                                                                       |
| EPI_ISL_823833, EPI_ISL_823834, EPI_ISL_823838                                                                                                                                                                                                                                                                                                                                                                                                                                                                                                                                                                                                                                                                                                                                                                                                                                                                                                                                                                                                                                                                                                                                                                                                                                                                                                                                                                                                                                                                                                                                                                                                                                                                                                                                                                                                                                                                                                                                                                                                                                                                                                                                                                                                                                                                                                                                                                                                                                                                                                                                                                                                                                                                                                                                                                                                                                                                                                                                                                                                                                                                                                                                                                                                                                                                                                                                                                                                                                                                                                                                                                                                                                                                                                                                                                                                                                                                                                                                                                                                                                                 | DOHMH Central Harlem                                                    | New York City Public Health Laboratory                                     | Jade Wang, et al.                                                                                                                                                                                                                                                                                                                                                       |
| EPI_ISL_823841                                                                                                                                                                                                                                                                                                                                                                                                                                                                                                                                                                                                                                                                                                                                                                                                                                                                                                                                                                                                                                                                                                                                                                                                                                                                                                                                                                                                                                                                                                                                                                                                                                                                                                                                                                                                                                                                                                                                                                                                                                                                                                                                                                                                                                                                                                                                                                                                                                                                                                                                                                                                                                                                                                                                                                                                                                                                                                                                                                                                                                                                                                                                                                                                                                                                                                                                                                                                                                                                                                                                                                                                                                                                                                                                                                                                                                                                                                                                                                                                                                                                                 | DOHMH Riverside                                                         | New York City Public Health Laboratory                                     | Jade Wang, et al.                                                                                                                                                                                                                                                                                                                                                       |
| EPI_ISL_823843                                                                                                                                                                                                                                                                                                                                                                                                                                                                                                                                                                                                                                                                                                                                                                                                                                                                                                                                                                                                                                                                                                                                                                                                                                                                                                                                                                                                                                                                                                                                                                                                                                                                                                                                                                                                                                                                                                                                                                                                                                                                                                                                                                                                                                                                                                                                                                                                                                                                                                                                                                                                                                                                                                                                                                                                                                                                                                                                                                                                                                                                                                                                                                                                                                                                                                                                                                                                                                                                                                                                                                                                                                                                                                                                                                                                                                                                                                                                                                                                                                                                                 | DOHMH Central Harlem                                                    | New York City Public Health Laboratory                                     | Jade Wang, et al.                                                                                                                                                                                                                                                                                                                                                       |
| EPI_ISL_823848                                                                                                                                                                                                                                                                                                                                                                                                                                                                                                                                                                                                                                                                                                                                                                                                                                                                                                                                                                                                                                                                                                                                                                                                                                                                                                                                                                                                                                                                                                                                                                                                                                                                                                                                                                                                                                                                                                                                                                                                                                                                                                                                                                                                                                                                                                                                                                                                                                                                                                                                                                                                                                                                                                                                                                                                                                                                                                                                                                                                                                                                                                                                                                                                                                                                                                                                                                                                                                                                                                                                                                                                                                                                                                                                                                                                                                                                                                                                                                                                                                                                                 | DOHMH Jamaica                                                           | New York City Public Health Laboratory                                     | Jade Wang, et al.                                                                                                                                                                                                                                                                                                                                                       |
| EPI_ISL_823849                                                                                                                                                                                                                                                                                                                                                                                                                                                                                                                                                                                                                                                                                                                                                                                                                                                                                                                                                                                                                                                                                                                                                                                                                                                                                                                                                                                                                                                                                                                                                                                                                                                                                                                                                                                                                                                                                                                                                                                                                                                                                                                                                                                                                                                                                                                                                                                                                                                                                                                                                                                                                                                                                                                                                                                                                                                                                                                                                                                                                                                                                                                                                                                                                                                                                                                                                                                                                                                                                                                                                                                                                                                                                                                                                                                                                                                                                                                                                                                                                                                                                 | DOHMH Fort Greene                                                       | New York City Public Health Laboratory                                     | Jade Wang, et al.                                                                                                                                                                                                                                                                                                                                                       |
| EPI_ISL_823850                                                                                                                                                                                                                                                                                                                                                                                                                                                                                                                                                                                                                                                                                                                                                                                                                                                                                                                                                                                                                                                                                                                                                                                                                                                                                                                                                                                                                                                                                                                                                                                                                                                                                                                                                                                                                                                                                                                                                                                                                                                                                                                                                                                                                                                                                                                                                                                                                                                                                                                                                                                                                                                                                                                                                                                                                                                                                                                                                                                                                                                                                                                                                                                                                                                                                                                                                                                                                                                                                                                                                                                                                                                                                                                                                                                                                                                                                                                                                                                                                                                                                 | DOHMH Corona                                                            | New York City Public Health Laboratory                                     | Jade Wang, et al.                                                                                                                                                                                                                                                                                                                                                       |

[illegible]



|                                                                                                                                                                                                                                                                                                                                                                                                                                                                                                                                                                                                                                                                                                                                                                                                                                                                                                                                                                                                                                                                                                                                                                                                                                                                                                                                                                                                                                                                                                                                                                                                                                                                                                                                                                                                                                                                                                                                                                                                                                                                                                                                                                                                                                                                                                                                                                                                                                                                                                                                                                                                                                                                                                                                                                                                                                                                |                                                                                                            |                                                                                                                               |                                                                                                                                                                                                                                                                |
|----------------------------------------------------------------------------------------------------------------------------------------------------------------------------------------------------------------------------------------------------------------------------------------------------------------------------------------------------------------------------------------------------------------------------------------------------------------------------------------------------------------------------------------------------------------------------------------------------------------------------------------------------------------------------------------------------------------------------------------------------------------------------------------------------------------------------------------------------------------------------------------------------------------------------------------------------------------------------------------------------------------------------------------------------------------------------------------------------------------------------------------------------------------------------------------------------------------------------------------------------------------------------------------------------------------------------------------------------------------------------------------------------------------------------------------------------------------------------------------------------------------------------------------------------------------------------------------------------------------------------------------------------------------------------------------------------------------------------------------------------------------------------------------------------------------------------------------------------------------------------------------------------------------------------------------------------------------------------------------------------------------------------------------------------------------------------------------------------------------------------------------------------------------------------------------------------------------------------------------------------------------------------------------------------------------------------------------------------------------------------------------------------------------------------------------------------------------------------------------------------------------------------------------------------------------------------------------------------------------------------------------------------------------------------------------------------------------------------------------------------------------------------------------------------------------------------------------------------------------|------------------------------------------------------------------------------------------------------------|-------------------------------------------------------------------------------------------------------------------------------|----------------------------------------------------------------------------------------------------------------------------------------------------------------------------------------------------------------------------------------------------------------|
| EPI_ISL_824240, EPI_ISL_824241, EPI_ISL_824242, EPI_ISL_824243, EPI_ISL_824244, EPI_ISL_824245, EPI_ISL_824246, EPI_ISL_824247, EPI_ISL_824248, EPI_ISL_824249, EPI_ISL_824250, EPI_ISL_824251, EPI_ISL_824252, EPI_ISL_824255, EPI_ISL_824256, EPI_ISL_824257, EPI_ISL_824258, EPI_ISL_824259, EPI_ISL_824260, EPI_ISL_824265, EPI_ISL_824266, EPI_ISL_824269, EPI_ISL_824271, EPI_ISL_824272, EPI_ISL_824273, EPI_ISL_824274, EPI_ISL_824275, EPI_ISL_824276, EPI_ISL_824277, EPI_ISL_824278, EPI_ISL_824281, EPI_ISL_824282, EPI_ISL_824283                                                                                                                                                                                                                                                                                                                                                                                                                                                                                                                                                                                                                                                                                                                                                                                                                                                                                                                                                                                                                                                                                                                                                                                                                                                                                                                                                                                                                                                                                                                                                                                                                                                                                                                                                                                                                                                                                                                                                                                                                                                                                                                                                                                                                                                                                                                 |                                                                                                            |                                                                                                                               |                                                                                                                                                                                                                                                                |
| see above                                                                                                                                                                                                                                                                                                                                                                                                                                                                                                                                                                                                                                                                                                                                                                                                                                                                                                                                                                                                                                                                                                                                                                                                                                                                                                                                                                                                                                                                                                                                                                                                                                                                                                                                                                                                                                                                                                                                                                                                                                                                                                                                                                                                                                                                                                                                                                                                                                                                                                                                                                                                                                                                                                                                                                                                                                                      | Dutch COVID-19 response team                                                                               | National Institute for Public Health and the Environment (RIVM)                                                               | Adam Meijer, Harry Vennema, Jeroen Cremer, Sharon van den Brink, Bas van der Veer, AnneMarie van den Brandt, Florian Zwagemaker, Dennis Schmitz, Chantal Reusken, on behalf of the national COVID-19 response team                                             |
| EPI_ISL_824285                                                                                                                                                                                                                                                                                                                                                                                                                                                                                                                                                                                                                                                                                                                                                                                                                                                                                                                                                                                                                                                                                                                                                                                                                                                                                                                                                                                                                                                                                                                                                                                                                                                                                                                                                                                                                                                                                                                                                                                                                                                                                                                                                                                                                                                                                                                                                                                                                                                                                                                                                                                                                                                                                                                                                                                                                                                 | Institute of Microbiology, Universidad San Francisco de Quito                                              | Institute of Microbiology, Universidad San Francisco de Quito                                                                 | Belén Prado-Vivar, Sully Márquez, Juan José Guadalupe, Monica Becerra-Wong, Bernardo Gutiérrez, Tania Guayasamin, Patricio Reyes, Verónica Barragán, Patricio Rojas-Silva, Gabriel Trueba, Michelle Grunauer, Paúl Cárdenas                                    |
| EPI_ISL_824286                                                                                                                                                                                                                                                                                                                                                                                                                                                                                                                                                                                                                                                                                                                                                                                                                                                                                                                                                                                                                                                                                                                                                                                                                                                                                                                                                                                                                                                                                                                                                                                                                                                                                                                                                                                                                                                                                                                                                                                                                                                                                                                                                                                                                                                                                                                                                                                                                                                                                                                                                                                                                                                                                                                                                                                                                                                 | Institute of Microbiology, Universidad San Francisco de Quito                                              | Institute of Microbiology, Universidad San Francisco de Quito                                                                 | Belén Prado-Vivar, Sully Márquez, Juan José Guadalupe, Monica Becerra-Wong, Bernardo Gutiérrez, Andrea Cungan, Nabih Dahik, Verónica Barragán, Patricio Rojas-Silva, Gabriel Trueba, Michelle Grunauer, Paúl Cárdenas                                          |
| EPI_ISL_824288, EPI_ISL_824289                                                                                                                                                                                                                                                                                                                                                                                                                                                                                                                                                                                                                                                                                                                                                                                                                                                                                                                                                                                                                                                                                                                                                                                                                                                                                                                                                                                                                                                                                                                                                                                                                                                                                                                                                                                                                                                                                                                                                                                                                                                                                                                                                                                                                                                                                                                                                                                                                                                                                                                                                                                                                                                                                                                                                                                                                                 | Institute of Microbiology, Universidad San Francisco de Quito                                              | Institute of Microbiology, Universidad San Francisco de Quito                                                                 | Belén Prado-Vivar, Sully Márquez, Juan José Guadalupe, Monica Becerra-Wong, Bernardo Gutiérrez, Tania Guayasamin, Patricio Reyes, Verónica Barragán, Patricio Rojas-Silva, Gabriel Trueba, Michelle Grunauer, Paúl Cárdenas                                    |
| EPI_ISL_824290                                                                                                                                                                                                                                                                                                                                                                                                                                                                                                                                                                                                                                                                                                                                                                                                                                                                                                                                                                                                                                                                                                                                                                                                                                                                                                                                                                                                                                                                                                                                                                                                                                                                                                                                                                                                                                                                                                                                                                                                                                                                                                                                                                                                                                                                                                                                                                                                                                                                                                                                                                                                                                                                                                                                                                                                                                                 | Institute of Microbiology, Universidad San Francisco de Quito                                              | Institute of Microbiology, Universidad San Francisco de Quito                                                                 | Belén Prado-Vivar, Sully Márquez, Juan José Guadalupe, Monica Becerra-Wong, Bernardo Gutiérrez, Andrea Cungan, Nabih Dahik, Verónica Barragán, Patricio Rojas-Silva, Gabriel Trueba, Michelle Grunauer, Paúl Cárdenas                                          |
| EPI_ISL_824297                                                                                                                                                                                                                                                                                                                                                                                                                                                                                                                                                                                                                                                                                                                                                                                                                                                                                                                                                                                                                                                                                                                                                                                                                                                                                                                                                                                                                                                                                                                                                                                                                                                                                                                                                                                                                                                                                                                                                                                                                                                                                                                                                                                                                                                                                                                                                                                                                                                                                                                                                                                                                                                                                                                                                                                                                                                 | DOHMH Jamaica                                                                                              | New York City Public Health Laboratory                                                                                        | Jade Wang, et al.                                                                                                                                                                                                                                              |
| EPI_ISL_824299                                                                                                                                                                                                                                                                                                                                                                                                                                                                                                                                                                                                                                                                                                                                                                                                                                                                                                                                                                                                                                                                                                                                                                                                                                                                                                                                                                                                                                                                                                                                                                                                                                                                                                                                                                                                                                                                                                                                                                                                                                                                                                                                                                                                                                                                                                                                                                                                                                                                                                                                                                                                                                                                                                                                                                                                                                                 | DOHMH Morrisania                                                                                           | New York City Public Health Laboratory                                                                                        | Jade Wang, et al.                                                                                                                                                                                                                                              |
| EPI_ISL_824300                                                                                                                                                                                                                                                                                                                                                                                                                                                                                                                                                                                                                                                                                                                                                                                                                                                                                                                                                                                                                                                                                                                                                                                                                                                                                                                                                                                                                                                                                                                                                                                                                                                                                                                                                                                                                                                                                                                                                                                                                                                                                                                                                                                                                                                                                                                                                                                                                                                                                                                                                                                                                                                                                                                                                                                                                                                 | DOHMH Chelsea                                                                                              | New York City Public Health Laboratory                                                                                        | Jade Wang, et al.                                                                                                                                                                                                                                              |
| EPI_ISL_824302                                                                                                                                                                                                                                                                                                                                                                                                                                                                                                                                                                                                                                                                                                                                                                                                                                                                                                                                                                                                                                                                                                                                                                                                                                                                                                                                                                                                                                                                                                                                                                                                                                                                                                                                                                                                                                                                                                                                                                                                                                                                                                                                                                                                                                                                                                                                                                                                                                                                                                                                                                                                                                                                                                                                                                                                                                                 | DOHMH Jamaica                                                                                              | New York City Public Health Laboratory                                                                                        | Jade Wang, et al.                                                                                                                                                                                                                                              |
| EPI_ISL_824303                                                                                                                                                                                                                                                                                                                                                                                                                                                                                                                                                                                                                                                                                                                                                                                                                                                                                                                                                                                                                                                                                                                                                                                                                                                                                                                                                                                                                                                                                                                                                                                                                                                                                                                                                                                                                                                                                                                                                                                                                                                                                                                                                                                                                                                                                                                                                                                                                                                                                                                                                                                                                                                                                                                                                                                                                                                 | DOHMH Morrisania                                                                                           | New York City Public Health Laboratory                                                                                        | Jade Wang, et al.                                                                                                                                                                                                                                              |
| EPI_ISL_824304, EPI_ISL_824308, EPI_ISL_824309                                                                                                                                                                                                                                                                                                                                                                                                                                                                                                                                                                                                                                                                                                                                                                                                                                                                                                                                                                                                                                                                                                                                                                                                                                                                                                                                                                                                                                                                                                                                                                                                                                                                                                                                                                                                                                                                                                                                                                                                                                                                                                                                                                                                                                                                                                                                                                                                                                                                                                                                                                                                                                                                                                                                                                                                                 | DOHMH Jamaica                                                                                              | New York City Public Health Laboratory                                                                                        | Jade Wang, et al.                                                                                                                                                                                                                                              |
| EPI_ISL_824310                                                                                                                                                                                                                                                                                                                                                                                                                                                                                                                                                                                                                                                                                                                                                                                                                                                                                                                                                                                                                                                                                                                                                                                                                                                                                                                                                                                                                                                                                                                                                                                                                                                                                                                                                                                                                                                                                                                                                                                                                                                                                                                                                                                                                                                                                                                                                                                                                                                                                                                                                                                                                                                                                                                                                                                                                                                 | DOHMH Crown Heights                                                                                        | New York City Public Health Laboratory                                                                                        | Jade Wang, et al.                                                                                                                                                                                                                                              |
| EPI_ISL_824312                                                                                                                                                                                                                                                                                                                                                                                                                                                                                                                                                                                                                                                                                                                                                                                                                                                                                                                                                                                                                                                                                                                                                                                                                                                                                                                                                                                                                                                                                                                                                                                                                                                                                                                                                                                                                                                                                                                                                                                                                                                                                                                                                                                                                                                                                                                                                                                                                                                                                                                                                                                                                                                                                                                                                                                                                                                 | DOHMH Fort Greene                                                                                          | New York City Public Health Laboratory                                                                                        | Jade Wang, et al.                                                                                                                                                                                                                                              |
| EPI_ISL_824313                                                                                                                                                                                                                                                                                                                                                                                                                                                                                                                                                                                                                                                                                                                                                                                                                                                                                                                                                                                                                                                                                                                                                                                                                                                                                                                                                                                                                                                                                                                                                                                                                                                                                                                                                                                                                                                                                                                                                                                                                                                                                                                                                                                                                                                                                                                                                                                                                                                                                                                                                                                                                                                                                                                                                                                                                                                 | DOHMH Jamaica                                                                                              | New York City Public Health Laboratory                                                                                        | Jade Wang, et al.                                                                                                                                                                                                                                              |
| EPI_ISL_824314, EPI_ISL_824315                                                                                                                                                                                                                                                                                                                                                                                                                                                                                                                                                                                                                                                                                                                                                                                                                                                                                                                                                                                                                                                                                                                                                                                                                                                                                                                                                                                                                                                                                                                                                                                                                                                                                                                                                                                                                                                                                                                                                                                                                                                                                                                                                                                                                                                                                                                                                                                                                                                                                                                                                                                                                                                                                                                                                                                                                                 | DOHMH Corona                                                                                               | New York City Public Health Laboratory                                                                                        | Jade Wang, et al.                                                                                                                                                                                                                                              |
| EPI_ISL_824316                                                                                                                                                                                                                                                                                                                                                                                                                                                                                                                                                                                                                                                                                                                                                                                                                                                                                                                                                                                                                                                                                                                                                                                                                                                                                                                                                                                                                                                                                                                                                                                                                                                                                                                                                                                                                                                                                                                                                                                                                                                                                                                                                                                                                                                                                                                                                                                                                                                                                                                                                                                                                                                                                                                                                                                                                                                 | DOHMH Crown Heights                                                                                        | New York City Public Health Laboratory                                                                                        | Jade Wang, et al.                                                                                                                                                                                                                                              |
| EPI_ISL_824318                                                                                                                                                                                                                                                                                                                                                                                                                                                                                                                                                                                                                                                                                                                                                                                                                                                                                                                                                                                                                                                                                                                                                                                                                                                                                                                                                                                                                                                                                                                                                                                                                                                                                                                                                                                                                                                                                                                                                                                                                                                                                                                                                                                                                                                                                                                                                                                                                                                                                                                                                                                                                                                                                                                                                                                                                                                 | DOHMH Central Harlem                                                                                       | New York City Public Health Laboratory                                                                                        | Jade Wang, et al.                                                                                                                                                                                                                                              |
| EPI_ISL_824320                                                                                                                                                                                                                                                                                                                                                                                                                                                                                                                                                                                                                                                                                                                                                                                                                                                                                                                                                                                                                                                                                                                                                                                                                                                                                                                                                                                                                                                                                                                                                                                                                                                                                                                                                                                                                                                                                                                                                                                                                                                                                                                                                                                                                                                                                                                                                                                                                                                                                                                                                                                                                                                                                                                                                                                                                                                 | DOHMH Corona                                                                                               | New York City Public Health Laboratory                                                                                        | Jade Wang, et al.                                                                                                                                                                                                                                              |
| EPI_ISL_824321                                                                                                                                                                                                                                                                                                                                                                                                                                                                                                                                                                                                                                                                                                                                                                                                                                                                                                                                                                                                                                                                                                                                                                                                                                                                                                                                                                                                                                                                                                                                                                                                                                                                                                                                                                                                                                                                                                                                                                                                                                                                                                                                                                                                                                                                                                                                                                                                                                                                                                                                                                                                                                                                                                                                                                                                                                                 | DOHMH Fort Greene                                                                                          | New York City Public Health Laboratory                                                                                        | Jade Wang, et al.                                                                                                                                                                                                                                              |
| EPI_ISL_824323, EPI_ISL_824325, EPI_ISL_824327                                                                                                                                                                                                                                                                                                                                                                                                                                                                                                                                                                                                                                                                                                                                                                                                                                                                                                                                                                                                                                                                                                                                                                                                                                                                                                                                                                                                                                                                                                                                                                                                                                                                                                                                                                                                                                                                                                                                                                                                                                                                                                                                                                                                                                                                                                                                                                                                                                                                                                                                                                                                                                                                                                                                                                                                                 | DOHMH Morrisania                                                                                           | New York City Public Health Laboratory                                                                                        | Jade Wang, et al.                                                                                                                                                                                                                                              |
| EPI_ISL_824328                                                                                                                                                                                                                                                                                                                                                                                                                                                                                                                                                                                                                                                                                                                                                                                                                                                                                                                                                                                                                                                                                                                                                                                                                                                                                                                                                                                                                                                                                                                                                                                                                                                                                                                                                                                                                                                                                                                                                                                                                                                                                                                                                                                                                                                                                                                                                                                                                                                                                                                                                                                                                                                                                                                                                                                                                                                 | DOHMH Corona                                                                                               | New York City Public Health Laboratory                                                                                        | Jade Wang, et al.                                                                                                                                                                                                                                              |
| EPI_ISL_824329, EPI_ISL_824330                                                                                                                                                                                                                                                                                                                                                                                                                                                                                                                                                                                                                                                                                                                                                                                                                                                                                                                                                                                                                                                                                                                                                                                                                                                                                                                                                                                                                                                                                                                                                                                                                                                                                                                                                                                                                                                                                                                                                                                                                                                                                                                                                                                                                                                                                                                                                                                                                                                                                                                                                                                                                                                                                                                                                                                                                                 | DOHMH Jamaica                                                                                              | New York City Public Health Laboratory                                                                                        | Jade Wang, et al.                                                                                                                                                                                                                                              |
| EPI_ISL_824396, EPI_ISL_824402, EPI_ISL_824404, EPI_ISL_824405                                                                                                                                                                                                                                                                                                                                                                                                                                                                                                                                                                                                                                                                                                                                                                                                                                                                                                                                                                                                                                                                                                                                                                                                                                                                                                                                                                                                                                                                                                                                                                                                                                                                                                                                                                                                                                                                                                                                                                                                                                                                                                                                                                                                                                                                                                                                                                                                                                                                                                                                                                                                                                                                                                                                                                                                 | California Department of Public Health                                                                     | California Department of Public Health                                                                                        | CDPH IDLB COVIDNet                                                                                                                                                                                                                                             |
| EPI_ISL_824520, EPI_ISL_824521, EPI_ISL_824525, EPI_ISL_824526, EPI_ISL_824527, EPI_ISL_824528, EPI_ISL_824529, EPI_ISL_824530, EPI_ISL_824531, EPI_ISL_824532, EPI_ISL_824533, EPI_ISL_824534, EPI_ISL_824536, EPI_ISL_824537, EPI_ISL_824538, EPI_ISL_824539, EPI_ISL_824542, EPI_ISL_824543, EPI_ISL_824544, EPI_ISL_824545, EPI_ISL_824546, EPI_ISL_824549, EPI_ISL_824551, EPI_ISL_824552, EPI_ISL_824553                                                                                                                                                                                                                                                                                                                                                                                                                                                                                                                                                                                                                                                                                                                                                                                                                                                                                                                                                                                                                                                                                                                                                                                                                                                                                                                                                                                                                                                                                                                                                                                                                                                                                                                                                                                                                                                                                                                                                                                                                                                                                                                                                                                                                                                                                                                                                                                                                                                 |                                                                                                            |                                                                                                                               |                                                                                                                                                                                                                                                                |
| see above                                                                                                                                                                                                                                                                                                                                                                                                                                                                                                                                                                                                                                                                                                                                                                                                                                                                                                                                                                                                                                                                                                                                                                                                                                                                                                                                                                                                                                                                                                                                                                                                                                                                                                                                                                                                                                                                                                                                                                                                                                                                                                                                                                                                                                                                                                                                                                                                                                                                                                                                                                                                                                                                                                                                                                                                                                                      | New Mexico Department of Health Scientific Laboratory                                                      | New Mexico Department of Health Scientific Laboratory                                                                         | Ellie Johnson, Anastacia Griego-Fisher, D'eldra Malone                                                                                                                                                                                                         |
| EPI_ISL_824555, EPI_ISL_824556, EPI_ISL_824557, EPI_ISL_824558, EPI_ISL_824559, EPI_ISL_824560, EPI_ISL_824561, EPI_ISL_824562, EPI_ISL_824563, EPI_ISL_824564, EPI_ISL_824565, EPI_ISL_824566, EPI_ISL_824567, EPI_ISL_824568, EPI_ISL_824569, EPI_ISL_824570, EPI_ISL_824571, EPI_ISL_824572, EPI_ISL_824573, EPI_ISL_824574, EPI_ISL_824575, EPI_ISL_824576, EPI_ISL_824577, EPI_ISL_824578, EPI_ISL_824579, EPI_ISL_824580, EPI_ISL_824581, EPI_ISL_824582, EPI_ISL_824583, EPI_ISL_824584, EPI_ISL_824585, EPI_ISL_824587, EPI_ISL_824588, EPI_ISL_824589, EPI_ISL_824590, EPI_ISL_824591, EPI_ISL_824592, EPI_ISL_824593, EPI_ISL_824594, EPI_ISL_824595, EPI_ISL_824596, EPI_ISL_824597, EPI_ISL_824598, EPI_ISL_824599, EPI_ISL_824600, EPI_ISL_824601, EPI_ISL_824602, EPI_ISL_824603, EPI_ISL_824604, EPI_ISL_824605, EPI_ISL_824606, EPI_ISL_824607, EPI_ISL_824608, EPI_ISL_824609, EPI_ISL_824610, EPI_ISL_824611, EPI_ISL_824612, EPI_ISL_824613, EPI_ISL_824614, EPI_ISL_824615, EPI_ISL_824616, EPI_ISL_824618, EPI_ISL_824619, EPI_ISL_824620, EPI_ISL_824621, EPI_ISL_824622, EPI_ISL_824623, EPI_ISL_824624, EPI_ISL_824625, EPI_ISL_824626, EPI_ISL_824627, EPI_ISL_824628, EPI_ISL_824629, EPI_ISL_824630, EPI_ISL_824631, EPI_ISL_824632, EPI_ISL_824633, EPI_ISL_824634, EPI_ISL_824635, EPI_ISL_824636, EPI_ISL_824637, EPI_ISL_824638, EPI_ISL_824639, EPI_ISL_824640, EPI_ISL_824641, EPI_ISL_824642, EPI_ISL_824643, EPI_ISL_824644, EPI_ISL_824645, EPI_ISL_824646, EPI_ISL_824647, EPI_ISL_824648, EPI_ISL_824649, EPI_ISL_824650, EPI_ISL_824651, EPI_ISL_824652, EPI_ISL_824653, EPI_ISL_824654, EPI_ISL_824655, EPI_ISL_824656, EPI_ISL_824658, EPI_ISL_824660, EPI_ISL_824661, EPI_ISL_824662, EPI_ISL_824663, EPI_ISL_824664, EPI_ISL_824665, EPI_ISL_824666, EPI_ISL_824667, EPI_ISL_824668, EPI_ISL_824669, EPI_ISL_824670, EPI_ISL_824671, EPI_ISL_824672, EPI_ISL_824673, EPI_ISL_824674, EPI_ISL_824675, EPI_ISL_824676, EPI_ISL_824677, EPI_ISL_824678, EPI_ISL_824679, EPI_ISL_824680, EPI_ISL_824681, EPI_ISL_824683, EPI_ISL_824684, EPI_ISL_824685, EPI_ISL_824686, EPI_ISL_824687, EPI_ISL_824688, EPI_ISL_824689, EPI_ISL_824690, EPI_ISL_824691, EPI_ISL_824692, EPI_ISL_824693, EPI_ISL_824695, EPI_ISL_824696, EPI_ISL_824697, EPI_ISL_824698, EPI_ISL_824700, EPI_ISL_824701, EPI_ISL_824702, EPI_ISL_824703, EPI_ISL_824704, EPI_ISL_824707, EPI_ISL_824708, EPI_ISL_824709, EPI_ISL_824710, EPI_ISL_824711, EPI_ISL_824712, EPI_ISL_824713, EPI_ISL_824714, EPI_ISL_824715, EPI_ISL_824716, EPI_ISL_824719, EPI_ISL_824720, EPI_ISL_824721, EPI_ISL_824722, EPI_ISL_824723, EPI_ISL_824724, EPI_ISL_824725, EPI_ISL_824726, EPI_ISL_824727, EPI_ISL_824728, EPI_ISL_824730, EPI_ISL_824731, EPI_ISL_824732, EPI_ISL_824733, EPI_ISL_824734, EPI_ISL_824735, EPI_ISL_824736, EPI_ISL_824737, EPI_ISL_824739 |                                                                                                            |                                                                                                                               |                                                                                                                                                                                                                                                                |
| see above                                                                                                                                                                                                                                                                                                                                                                                                                                                                                                                                                                                                                                                                                                                                                                                                                                                                                                                                                                                                                                                                                                                                                                                                                                                                                                                                                                                                                                                                                                                                                                                                                                                                                                                                                                                                                                                                                                                                                                                                                                                                                                                                                                                                                                                                                                                                                                                                                                                                                                                                                                                                                                                                                                                                                                                                                                                      | Cedars-Sinai Medical Center, Department of Pathology & Laboratory Medicine, Molecular Pathology Laboratory | Cedars-Sinai Medical Center, Molecular Pathology Laboratory of Department of Pathology & Laboratory Medicine and Genomic Core | Wenjuan Zhang, Brian Davis, Stephanie Chen, Jorge Mario Sincuir Martinez, Jasmine T Plummer, Eric Vail                                                                                                                                                         |
| EPI_ISL_824742, EPI_ISL_824744, EPI_ISL_824745, EPI_ISL_824746, EPI_ISL_824747, EPI_ISL_824749, EPI_ISL_824750, EPI_ISL_824751, EPI_ISL_824752, EPI_ISL_824755, EPI_ISL_824756, EPI_ISL_824757, EPI_ISL_824758, EPI_ISL_824759, EPI_ISL_824760, EPI_ISL_824761, EPI_ISL_824762, EPI_ISL_824763, EPI_ISL_824764, EPI_ISL_824765, EPI_ISL_824766, EPI_ISL_824767, EPI_ISL_824768, EPI_ISL_824769, EPI_ISL_824770, EPI_ISL_824771, EPI_ISL_824772, EPI_ISL_824773, EPI_ISL_824774, EPI_ISL_824775, EPI_ISL_824776, EPI_ISL_824777, EPI_ISL_824778, EPI_ISL_824779, EPI_ISL_824780, EPI_ISL_824781, EPI_ISL_824782, EPI_ISL_824786                                                                                                                                                                                                                                                                                                                                                                                                                                                                                                                                                                                                                                                                                                                                                                                                                                                                                                                                                                                                                                                                                                                                                                                                                                                                                                                                                                                                                                                                                                                                                                                                                                                                                                                                                                                                                                                                                                                                                                                                                                                                                                                                                                                                                                 |                                                                                                            |                                                                                                                               |                                                                                                                                                                                                                                                                |
| see above                                                                                                                                                                                                                                                                                                                                                                                                                                                                                                                                                                                                                                                                                                                                                                                                                                                                                                                                                                                                                                                                                                                                                                                                                                                                                                                                                                                                                                                                                                                                                                                                                                                                                                                                                                                                                                                                                                                                                                                                                                                                                                                                                                                                                                                                                                                                                                                                                                                                                                                                                                                                                                                                                                                                                                                                                                                      | A. Krumbholz, Labor Dr. Krause und Kollegen MVZ GmbH, Kiel                                                 | Charité Universitätsmedizin Berlin, Institut für Virologie                                                                    | Victor M Corman, Jörn Beheim-Schwarzbach, Julia Schneider, Talitha Veith, Barbara Mühlemann, Terry Jones, Christian Drosten                                                                                                                                    |
| EPI_ISL_824793, EPI_ISL_824801, EPI_ISL_824802, EPI_ISL_824803, EPI_ISL_824805, EPI_ISL_824806, EPI_ISL_824807, EPI_ISL_824808, EPI_ISL_824811, EPI_ISL_824813, EPI_ISL_824814, EPI_ISL_824817, EPI_ISL_824819, EPI_ISL_824820, EPI_ISL_824821, EPI_ISL_824822, EPI_ISL_824823, EPI_ISL_824824, EPI_ISL_824827, EPI_ISL_824828, EPI_ISL_824829, EPI_ISL_824830, EPI_ISL_824833                                                                                                                                                                                                                                                                                                                                                                                                                                                                                                                                                                                                                                                                                                                                                                                                                                                                                                                                                                                                                                                                                                                                                                                                                                                                                                                                                                                                                                                                                                                                                                                                                                                                                                                                                                                                                                                                                                                                                                                                                                                                                                                                                                                                                                                                                                                                                                                                                                                                                 |                                                                                                            |                                                                                                                               |                                                                                                                                                                                                                                                                |
| see above                                                                                                                                                                                                                                                                                                                                                                                                                                                                                                                                                                                                                                                                                                                                                                                                                                                                                                                                                                                                                                                                                                                                                                                                                                                                                                                                                                                                                                                                                                                                                                                                                                                                                                                                                                                                                                                                                                                                                                                                                                                                                                                                                                                                                                                                                                                                                                                                                                                                                                                                                                                                                                                                                                                                                                                                                                                      | Department of Clinical Microbiology                                                                        | GIGA Medical Genomics                                                                                                         | Keith Durkin, Maria Artesi, Sébastien Bontems, Raphaël Boreux, Bouchra Boujemla, Cécile Meex, Pierrette Melin, Marie-Pierre Hayette, Vincent Bours                                                                                                             |
| EPI_ISL_824921                                                                                                                                                                                                                                                                                                                                                                                                                                                                                                                                                                                                                                                                                                                                                                                                                                                                                                                                                                                                                                                                                                                                                                                                                                                                                                                                                                                                                                                                                                                                                                                                                                                                                                                                                                                                                                                                                                                                                                                                                                                                                                                                                                                                                                                                                                                                                                                                                                                                                                                                                                                                                                                                                                                                                                                                                                                 | Charité Universitätsmedizin Berlin, Institute of Virology, Charitéplatz 1, 10117 Berlin, Germany           | Charité Universitätsmedizin Berlin, Institute of Virology, Charitéplatz 1, 10117 Berlin, Germany                              | Victor M Corman, Jörn Beheim-Schwarzbach, Tobias Bleicker, Julia Tesch, Barbara Mühlemann, Talitha Veith, Julia Schneider, Terry Jones, Christian Drosten                                                                                                      |
| EPI_ISL_824925, EPI_ISL_824938                                                                                                                                                                                                                                                                                                                                                                                                                                                                                                                                                                                                                                                                                                                                                                                                                                                                                                                                                                                                                                                                                                                                                                                                                                                                                                                                                                                                                                                                                                                                                                                                                                                                                                                                                                                                                                                                                                                                                                                                                                                                                                                                                                                                                                                                                                                                                                                                                                                                                                                                                                                                                                                                                                                                                                                                                                 | Arizona State Public Health Laboratory                                                                     | Arizona State Public Health Laboratory                                                                                        | Trung Huynh, Jessica Escobar, Katherine Fullerton, Nobuko Fukushima, Stacy White, Linda Getsinger, Victor Waddell                                                                                                                                              |
| EPI_ISL_824945, EPI_ISL_824946, EPI_ISL_824947, EPI_ISL_824948, EPI_ISL_824949, EPI_ISL_824950, EPI_ISL_824951, EPI_ISL_824952, EPI_ISL_824980, EPI_ISL_824981, EPI_ISL_824982, EPI_ISL_824983, EPI_ISL_824984                                                                                                                                                                                                                                                                                                                                                                                                                                                                                                                                                                                                                                                                                                                                                                                                                                                                                                                                                                                                                                                                                                                                                                                                                                                                                                                                                                                                                                                                                                                                                                                                                                                                                                                                                                                                                                                                                                                                                                                                                                                                                                                                                                                                                                                                                                                                                                                                                                                                                                                                                                                                                                                 |                                                                                                            |                                                                                                                               |                                                                                                                                                                                                                                                                |
| see above                                                                                                                                                                                                                                                                                                                                                                                                                                                                                                                                                                                                                                                                                                                                                                                                                                                                                                                                                                                                                                                                                                                                                                                                                                                                                                                                                                                                                                                                                                                                                                                                                                                                                                                                                                                                                                                                                                                                                                                                                                                                                                                                                                                                                                                                                                                                                                                                                                                                                                                                                                                                                                                                                                                                                                                                                                                      | Maryland Public Health Laboratory                                                                          | Maryland Public Health Laboratory                                                                                             | Maryland Department of Health Laboratories Administration                                                                                                                                                                                                      |
| EPI_ISL_825036                                                                                                                                                                                                                                                                                                                                                                                                                                                                                                                                                                                                                                                                                                                                                                                                                                                                                                                                                                                                                                                                                                                                                                                                                                                                                                                                                                                                                                                                                                                                                                                                                                                                                                                                                                                                                                                                                                                                                                                                                                                                                                                                                                                                                                                                                                                                                                                                                                                                                                                                                                                                                                                                                                                                                                                                                                                 | B.J. Medical College and Civil hospital, Ahmedabad                                                         | Gujarat Biotechnology Research Centre                                                                                         | Dipa Kinariwala, Dinesh Kumar, Zuber Saiyed, Labdhi Pandya, Atfal Ansari, Nikha Trivedi, Apurvasinh Puvar, Ramesh Pandit, Janvi Raval, Zarna Patel, Nitin Savaliya, Kamlesh J Upadhyay, Nilma Shah, Sanjay Kapadia, Pranay Shah, Chaitanya Joshi, Madhvi Joshi |
| EPI_ISL_825048                                                                                                                                                                                                                                                                                                                                                                                                                                                                                                                                                                                                                                                                                                                                                                                                                                                                                                                                                                                                                                                                                                                                                                                                                                                                                                                                                                                                                                                                                                                                                                                                                                                                                                                                                                                                                                                                                                                                                                                                                                                                                                                                                                                                                                                                                                                                                                                                                                                                                                                                                                                                                                                                                                                                                                                                                                                 | GMERS Medical College and Hospital, Gotri, Vadodara                                                        | Gujarat Biotechnology Research Centre                                                                                         | Mitesh Kamothi, Zuber Saiyed, Labdhi Pandya, Atfal Ansari, Nikha Trivedi, Apurvasinh Puvar, Ramesh Pandit, Janvi Raval, Zarna Patel, Nitin Savaliya, Dinesh Kumar, Bithika Duttaroy, Kalpesh Mistry, Chaitanya Joshi, Madhvi Joshi                             |
| EPI_ISL_825049                                                                                                                                                                                                                                                                                                                                                                                                                                                                                                                                                                                                                                                                                                                                                                                                                                                                                                                                                                                                                                                                                                                                                                                                                                                                                                                                                                                                                                                                                                                                                                                                                                                                                                                                                                                                                                                                                                                                                                                                                                                                                                                                                                                                                                                                                                                                                                                                                                                                                                                                                                                                                                                                                                                                                                                                                                                 | GMERS Medical College and Hospital, Gotri, Vadodara                                                        | Gujarat Biotechnology Research Centre                                                                                         | Bithika Duttaroy, Labdhi Pandya, Atfal Ansari, Nikha Trivedi, Apurvasinh Puvar, Ramesh Pandit, Janvi Raval, Zarna Patel, Nitin Savaliya, Dinesh Kumar, Zuber Saiyed, Mitesh Kamothi, Kalpesh Mistry, Chaitanya Joshi, Madhvi Joshi                             |

|                                                                                                                                                                                                                                                                                                                                                                                                                                                                                                                                                                                                |                                                                           |                                                                                              |                                                                                                                                                                                                                                                                                                                                                                                                                                                                                                                                                                                                                                                                                                                                                                                                                                    |
|------------------------------------------------------------------------------------------------------------------------------------------------------------------------------------------------------------------------------------------------------------------------------------------------------------------------------------------------------------------------------------------------------------------------------------------------------------------------------------------------------------------------------------------------------------------------------------------------|---------------------------------------------------------------------------|----------------------------------------------------------------------------------------------|------------------------------------------------------------------------------------------------------------------------------------------------------------------------------------------------------------------------------------------------------------------------------------------------------------------------------------------------------------------------------------------------------------------------------------------------------------------------------------------------------------------------------------------------------------------------------------------------------------------------------------------------------------------------------------------------------------------------------------------------------------------------------------------------------------------------------------|
| EPI_ISL_825050                                                                                                                                                                                                                                                                                                                                                                                                                                                                                                                                                                                 | NHL Municipal Medical College, Ahmedbad                                   | Gujarat Biotechnology Research Centre                                                        | Tanmay Mehta, Afzal Ansari, Nikha Trivedi, Apurvasinh Puvar, Ramesh Pandit, Janvi Raval, Zarna Patel, Nitin Savaliya, Dinesh Kumar, Zuber Saiyed, Labdhi Pandya, Jayshri Pethani, Monila Patel, Atit Shah, NM Shaikh, Bimal Chauhan, Bhavin Prajapati, Chaitanya Joshi, Madhvi Joshi                                                                                                                                                                                                                                                                                                                                                                                                                                                                                                                                               |
| EPI_ISL_825051                                                                                                                                                                                                                                                                                                                                                                                                                                                                                                                                                                                 | NHL Municipal Medical College, Ahmedbad                                   | Gujarat Biotechnology Research Centre                                                        | Bhavin Prajapati, Nikha Trivedi, Apurvasinh Puvar, Ramesh Pandit, Janvi Raval, Zarna Patel, Nitin Savaliya, Dinesh Kumar, Zuber Saiyed, Labdhi Pandya, Afzal Ansari, Jayshri Pethani, Monila Patel, Atit Shah, NM Shaikh, Bimal Chauhan, Tanmay Mehta, Chaitanya Joshi, Madhvi Joshi                                                                                                                                                                                                                                                                                                                                                                                                                                                                                                                                               |
| EPI_ISL_825052                                                                                                                                                                                                                                                                                                                                                                                                                                                                                                                                                                                 | NHL Municipal Medical College, Ahmedbad                                   | Gujarat Biotechnology Research Centre                                                        | Apurvasinh Puvar, Ramesh Pandit, Janvi Raval, Zarna Patel, Nitin Savaliya, Dinesh Kumar, Zuber Saiyed, Labdhi Pandya, Afzal Ansari, Nikha Trivedi, Jayshri Pethani, Monila Patel, Atit Shah, NM Shaikh, Bimal Chauhan, Tanmay Mehta, Bhavin Prajapati, Chaitanya Joshi, Madhvi Joshi                                                                                                                                                                                                                                                                                                                                                                                                                                                                                                                                               |
| EPI_ISL_825053                                                                                                                                                                                                                                                                                                                                                                                                                                                                                                                                                                                 | NHL Municipal Medical College, Ahmedbad                                   | Gujarat Biotechnology Research Centre                                                        | Ramesh Pandit, Janvi Raval, Zarna Patel, Nitin Savaliya, Dinesh Kumar, Zuber Saiyed, Labdhi Pandya, Afzal Ansari, Nikha Trivedi, Apurvasinh Puvar, Jayshri Pethani, Monila Patel, Atit Shah, NM Shaikh, Bimal Chauhan, Tanmay Mehta, Bhavin Prajapati, Chaitanya Joshi, Madhvi Joshi                                                                                                                                                                                                                                                                                                                                                                                                                                                                                                                                               |
| EPI_ISL_825054                                                                                                                                                                                                                                                                                                                                                                                                                                                                                                                                                                                 | GMERS Medical College and Hospital, Gotri, Vadodara                       | Gujarat Biotechnology Research Centre                                                        | Kalpesh Mistry, Janvi Raval, Zarna Patel, Nitin Savaliya, Dinesh Kumar, Zuber Saiyed, Afzal Ansari, Nikha Trivedi, Apurvasinh Puvar, Ramesh Pandit, Mitesh Kamothi, Bithika Duttaroy, Chaitanya Joshi, Madhvi Joshi                                                                                                                                                                                                                                                                                                                                                                                                                                                                                                                                                                                                                |
| EPI_ISL_825057                                                                                                                                                                                                                                                                                                                                                                                                                                                                                                                                                                                 | GMERS Medical College and Hospital, Gotri, Vadodara                       | Gujarat Biotechnology Research Centre                                                        | Dinesh Kumar, Zuber Saiyed, Afzal Ansari, Nikha Trivedi, Apurvasinh Puvar, Ramesh Pandit, Janvi Raval, Zarna Patel, Nitin Savaliya, Mitesh Kamothi, Bithika Duttaroy, Kalpesh Mistry, Chaitanya Joshi, Madhvi Joshi                                                                                                                                                                                                                                                                                                                                                                                                                                                                                                                                                                                                                |
| EPI_ISL_825058                                                                                                                                                                                                                                                                                                                                                                                                                                                                                                                                                                                 | GMERS Medical College and Hospital, Gotri, Vadodara                       | Gujarat Biotechnology Research Centre                                                        | Zuber Saiyed, Afzal Ansari, Nikha Trivedi, Apurvasinh Puvar, Ramesh Pandit, Janvi Raval, Zarna Patel, Nitin Savaliya, Dinesh Kumar, Mitesh Kamothi, Bithika Duttaroy, Kalpesh Mistry, Chaitanya Joshi, Madhvi Joshi                                                                                                                                                                                                                                                                                                                                                                                                                                                                                                                                                                                                                |
| EPI_ISL_825060                                                                                                                                                                                                                                                                                                                                                                                                                                                                                                                                                                                 | NHL Municipal Medical College, Ahmedbad                                   | Gujarat Biotechnology Research Centre                                                        | Nikha Trivedi, Apurvasinh Puvar, Ramesh Pandit, Janvi Raval, Zarna Patel, Nitin Savaliya, Dinesh Kumar, Zuber Saiyed, Afzal Ansari, Jayshri Pethani, Monila Patel, Atit Shah, NM Shaikh, Bimal Chauhan, Tanmay Mehta, Bhavin Prajapati, Chaitanya Joshi, Madhvi Joshi                                                                                                                                                                                                                                                                                                                                                                                                                                                                                                                                                              |
| EPI_ISL_825061                                                                                                                                                                                                                                                                                                                                                                                                                                                                                                                                                                                 | GMERS Medical College and Hospital, Gotri, Vadodara                       | Gujarat Biotechnology Research Centre                                                        | Apurvasinh Puvar, Ramesh Pandit, Janvi Raval, Zarna Patel, Nitin Savaliya, Dinesh Kumar, Zuber Saiyed, Afzal Ansari, Nikha Trivedi, Mitesh Kamothi, Bithika Duttaroy, Kalpesh Mistry, Chaitanya Joshi, Madhvi Joshi                                                                                                                                                                                                                                                                                                                                                                                                                                                                                                                                                                                                                |
| EPI_ISL_825062                                                                                                                                                                                                                                                                                                                                                                                                                                                                                                                                                                                 | GMERS Medical College and Hospital, Gotri, Vadodara                       | Gujarat Biotechnology Research Centre                                                        | Ramesh Pandit, Janvi Raval, Zarna Patel, Nitin Savaliya, Dinesh Kumar, Zuber Saiyed, Afzal Ansari, Nikha Trivedi, Apurvasinh Puvar, Mitesh Kamothi, Bithika Duttaroy, Kalpesh Mistry, Chaitanya Joshi, Madhvi Joshi                                                                                                                                                                                                                                                                                                                                                                                                                                                                                                                                                                                                                |
| EPI_ISL_825063                                                                                                                                                                                                                                                                                                                                                                                                                                                                                                                                                                                 | NHL Municipal Medical College, Ahmedbad                                   | Gujarat Biotechnology Research Centre                                                        | Janvi Raval, Zarna Patel, Nitin Savaliya, Dinesh Kumar, Zuber Saiyed, Afzal Ansari, Nikha Trivedi, Apurvasinh Puvar, Ramesh Pandit, Jayshri Pethani, Monila Patel, Atit Shah, NM Shaikh, Bimal Chauhan, Tanmay Mehta, Bhavin Prajapati, Chaitanya Joshi, Madhvi Joshi                                                                                                                                                                                                                                                                                                                                                                                                                                                                                                                                                              |
| EPI_ISL_825141                                                                                                                                                                                                                                                                                                                                                                                                                                                                                                                                                                                 | BBMP Urban PHC                                                            | Department of Neurovirology, National Institute of Mental Health and Neurosciences (NIMHANS) | Chitra Pattabiraman, Pramada Prasad, Anita S Desai, V Ravi                                                                                                                                                                                                                                                                                                                                                                                                                                                                                                                                                                                                                                                                                                                                                                         |
| EPI_ISL_825156                                                                                                                                                                                                                                                                                                                                                                                                                                                                                                                                                                                 | Microbiology and Virology Unit, Florence Careggi University Hospital      | Microbiology and Virology Unit, Florence Careggi University Hospital                         | Vincenzo Di Pilato, Marco Coppi, Fabio Morecchiato, Alberto Antonelli, Emanuele Gori, Gian Maria Rossolini                                                                                                                                                                                                                                                                                                                                                                                                                                                                                                                                                                                                                                                                                                                         |
| EPI_ISL_825336, EPI_ISL_825367, EPI_ISL_825368, EPI_ISL_825369, EPI_ISL_825370, EPI_ISL_825371, EPI_ISL_825372, EPI_ISL_825373, EPI_ISL_825374, EPI_ISL_825375, EPI_ISL_825376, EPI_ISL_825377, EPI_ISL_825378, EPI_ISL_825379, EPI_ISL_825380, EPI_ISL_825381                                                                                                                                                                                                                                                                                                                                 |                                                                           |                                                                                              |                                                                                                                                                                                                                                                                                                                                                                                                                                                                                                                                                                                                                                                                                                                                                                                                                                    |
| see above                                                                                                                                                                                                                                                                                                                                                                                                                                                                                                                                                                                      | Hospital Universitari Vall d'Hebron - Vall d'Hebron Institut de Recerca   | Hospital Universitari Vall d'Hebron                                                          | Cristina Andrés, Maria Piñana, Josep F Abril, Damir Garcia-Cehic, Ariadna Rando, Juliana Esperalba, Maria Gema Codina, Carla Castillo, Maria Carmen Martín, Tomás Pumarola, Josep Quer, Andrés Antón                                                                                                                                                                                                                                                                                                                                                                                                                                                                                                                                                                                                                               |
| EPI_ISL_825501, EPI_ISL_825503, EPI_ISL_825504, EPI_ISL_825505, EPI_ISL_825508, EPI_ISL_825509, EPI_ISL_825512, EPI_ISL_825513, EPI_ISL_825516, EPI_ISL_825518, EPI_ISL_825520, EPI_ISL_825522, EPI_ISL_825525, EPI_ISL_825528, EPI_ISL_825530, EPI_ISL_825535, EPI_ISL_825537, EPI_ISL_825539, EPI_ISL_825540, EPI_ISL_825542, EPI_ISL_825543, EPI_ISL_825545, EPI_ISL_825554, EPI_ISL_825555, EPI_ISL_825560, EPI_ISL_825561, EPI_ISL_825562, EPI_ISL_825563, EPI_ISL_825564, EPI_ISL_825565, EPI_ISL_825570, EPI_ISL_825605, EPI_ISL_825606, EPI_ISL_825608, EPI_ISL_825609, EPI_ISL_825615 |                                                                           |                                                                                              |                                                                                                                                                                                                                                                                                                                                                                                                                                                                                                                                                                                                                                                                                                                                                                                                                                    |
| see above                                                                                                                                                                                                                                                                                                                                                                                                                                                                                                                                                                                      | Respiratory Virus Unit, National Infection Service, Public Health England | COVID-19 Genomics UK (COG-UK) Consortium                                                     | PHE Covid Sequencing Team                                                                                                                                                                                                                                                                                                                                                                                                                                                                                                                                                                                                                                                                                                                                                                                                          |
| EPI_ISL_825620, EPI_ISL_825621, EPI_ISL_825624, EPI_ISL_825627, EPI_ISL_825628                                                                                                                                                                                                                                                                                                                                                                                                                                                                                                                 | Hospital Universitari Vall d'Hebron - Vall d'Hebron Institut de Recerca   | Hospital Universitari Vall d'Hebron                                                          | Cristina Andrés, Maria Piñana, Josep F Abril, Damir Garcia-Cehic, Ariadna Rando, Juliana Esperalba, Maria Gema Codina, Carla Castillo, Maria Carmen Martín, Tomás Pumarola, Josep Quer, Andrés Antón                                                                                                                                                                                                                                                                                                                                                                                                                                                                                                                                                                                                                               |
| EPI_ISL_826284                                                                                                                                                                                                                                                                                                                                                                                                                                                                                                                                                                                 | University of Bari Biomedical Sciences and Human Oncology                 | University of Bari Biomedical Sciences and Human Oncology                                    | Chironna Maria, Sallustio Anna, Loconsole Daniela, Accogli Marisa                                                                                                                                                                                                                                                                                                                                                                                                                                                                                                                                                                                                                                                                                                                                                                  |
| EPI_ISL_826286, EPI_ISL_826287, EPI_ISL_826288, EPI_ISL_826289, EPI_ISL_826291, EPI_ISL_826292, EPI_ISL_826293, EPI_ISL_826294, EPI_ISL_826295                                                                                                                                                                                                                                                                                                                                                                                                                                                 | The Jackson Laboratory                                                    | The Jackson Laboratory                                                                       | Lloyd M, Maurya R, Renzette N, Omerza G, Kelly K, Li L, Wei C L, Adams M                                                                                                                                                                                                                                                                                                                                                                                                                                                                                                                                                                                                                                                                                                                                                           |
| EPI_ISL_826458                                                                                                                                                                                                                                                                                                                                                                                                                                                                                                                                                                                 | University of Bari Biomedical Sciences and Human Oncology                 | University of Bari Biomedical Sciences and Human Oncology                                    | Chironna Maria, Sallustio Anna, Loconsole Daniela, Accogli Marisa                                                                                                                                                                                                                                                                                                                                                                                                                                                                                                                                                                                                                                                                                                                                                                  |
| EPI_ISL_826465, EPI_ISL_826472                                                                                                                                                                                                                                                                                                                                                                                                                                                                                                                                                                 | Lighthouse Lab in Alderley Park                                           | Wellcome Sanger Institute for the COVID-19 Genomics UK (COG-UK) Consortium                   | Jacquelyn Wynn, Mairead Hyland, The Lighthouse Lab in Alderley Park and Alex Alderton, Roberto Amato, Sonia Goncalves, Ewan Harrison, David K. Jackson, Ian Johnston, Dominic Kwiatkowski, Cordelia Langford, John Sillitoe on behalf of the Wellcome Sanger Institute COVID-19 Surveillance Team                                                                                                                                                                                                                                                                                                                                                                                                                                                                                                                                  |
| EPI_ISL_826521                                                                                                                                                                                                                                                                                                                                                                                                                                                                                                                                                                                 | The Ohio State University                                                 | James Molecular Laboratory                                                                   | Huolin Tu, Matthew R Avenarius, Laura Kubatko, Matthew Hunt, Xiaokang Pan, Peng Ru, Jason Garee, Keele Thomas, Peter Mohler, Preeti Pancholi, Dan Jones                                                                                                                                                                                                                                                                                                                                                                                                                                                                                                                                                                                                                                                                            |
| EPI_ISL_826695, EPI_ISL_826698, EPI_ISL_826716, EPI_ISL_826808, EPI_ISL_826864, EPI_ISL_826867, EPI_ISL_826889, EPI_ISL_826890, EPI_ISL_826891                                                                                                                                                                                                                                                                                                                                                                                                                                                 | deCODE genetics                                                           | deCODE genetics                                                                              | Daniel F Gudbjartsson; Agnar Helgason; Hakon Jonsson; Olafur T Magnusson; Pall Melsted; Gudmundur L Norddahl; Jona Saemundsdottir; Asgeir Sigurdsson; Patrick Sulem; Arna B Agustsdottir; Hannes Eggertsson; Berglind Eiríksdóttir; Run Fridríksdóttir; Elisabet E Gardarsdóttir; Gudmundur Georgsson; Olafía S Gretarsdóttir; Kjartan R Gudmundsson; Thora R Gunnarsdóttir; Arnaldur Gylfason; Hilma Holm; Brynjar O Jenson; Aslaug Jonasdóttir; Kamilla S Josefsdóttir; Thordur Kristjánsson; Droplaug N Magnúsdóttir; Solvi Rognvaldsson; Louise le Roux; Gudrun Sigmundsdóttir; Gardar Sveinbjörnsson; Kristín E Sveinsdóttir; Maney Sveinsdóttir; Emil A Thorarensen; Bjarni Thorbjörnsson; Gisli Masson; Ingileif Jónsdóttir; Alma Møller; Thorolfur Guðnason; Karl G Kristinnsson; Unnur Thorsteinsdóttir; Kari Stefánsson  |
| EPI_ISL_826893, EPI_ISL_826980, EPI_ISL_827014                                                                                                                                                                                                                                                                                                                                                                                                                                                                                                                                                 | The National University Hospital of Iceland                               | deCODE genetics                                                                              | Daniel F Gudbjartsson; Agnar Helgason; Hakon Jonsson; Olafur T Magnusson; Pall Melsted; Gudmundur L Norddahl; Jona Saemundsdottir; Asgeir Sigurdsson; Patrick Sulem; Arna B Agustsdottir; Hannes Eggertsson; Berglind Eiriksdoottir; Run Fridriksdottir; Elisabet E Gardarsdottir; Gudmundur Georgsson; Olafia S Gretarsdottir; Kjartan R Gudmundsson; Thora R Gunnarsdottir; Arnaldur Gylfason; Hilma Holm; Brynjar O Jenson; Aslaug Jonasdottir; Kamilla S Josefsdottir; Thordur Kristjansson; Droplaug N Magnúsdottir; Solvi Rognvaldsson; Louise le Roux; Gudrun Sigmundsdottir; Gardar Sveinbjornsson; Kristin E Sveinsdottir; Maney Sveinsdottir; Emil A Thorarensen; Bjarni Thorbjornsson; Gisli Masson; Ingileif Jonsdottir; Alma Moller; Thorolfur Gudnason; Karl G Kristinnsson; Unnur Thorsteinsdottir; Kari Stefansson |
| EPI_ISL_827078, EPI_ISL_827145, EPI_ISL_827167, EPI_ISL_827168, EPI_ISL_827184                                                                                                                                                                                                                                                                                                                                                                                                                                                                                                                 | deCODE genetics                                                           | deCODE genetics                                                                              | Daniel F Gudbjartsson; Agnar Helgason; Hakon Jonsson; Olafur T Magnusson; Pall Melsted; Gudmundur L Norddahl; Jona Saemundsdottir; Asgeir Sigurdsson; Patrick Sulem; Arna B Agustsdottir; Hannes Eggertsson; Berglind Eiriksdoottir; Run Fridriksdottir; Elisabet E Gardarsdottir; Gudmundur Georgsson; Olafia S Gretarsdottir; Kjartan R Gudmundsson; Thora R Gunnarsdottir; Arnaldur Gylfason; Hilma Holm; Brynjar O Jenson; Aslaug Jonasdottir; Kamilla S Josefsdottir; Thordur Kristjansson; Droplaug N Magnúsdottir; Solvi Rognvaldsson; Louise le Roux; Gudrun Sigmundsdottir; Gardar Sveinbjornsson; Kristin E Sveinsdottir; Maney Sveinsdottir; Emil A Thorarensen; Bjarni Thorbjornsson; Gisli Masson; Ingileif Jonsdottir; Alma Moller; Thorolfur Gudnason; Karl G Kristinnsson; Unnur Thorsteinsdottir; Kari Stefansson |
| EPI_ISL_827195                                                                                                                                                                                                                                                                                                                                                                                                                                                                                                                                                                                 | The National University Hospital of Iceland                               | deCODE genetics                                                                              | Daniel F Gudbjartsson; Agnar Helgason; Hakon Jonsson; Olafur T Magnusson; Pall Melsted; Gudmundur L Norddahl; Jona Saemundsdottir; Asgeir Sigurdsson; Patrick Sulem; Arna B Agustsdottir; Hannes Eggertsson; Berglind Eiriksdoottir; Run Fridriksdottir; Elisabet E Gardarsdottir; Gudmundur Georgsson; Olafia S Gretarsdottir; Kjartan R Gudmundsson; Thora R Gunnarsdottir; Arnaldur Gylfason; Hilma Holm; Brynjar O Jenson; Aslaug Jonasdottir; Kamilla S Josefsdottir; Thordur Kristjansson; Droplaug N Magnúsdottir; Solvi Rognvaldsson; Louise le Roux; Gudrun Sigmundsdottir; Gardar Sveinbjornsson; Kristin E Sveinsdottir; Maney Sveinsdottir; Emil A Thorarensen; Bjarni Thorbjornsson; Gisli Masson; Ingileif Jonsdottir; Alma Moller; Thorolfur Gudnason; Karl G Kristinnsson; Unnur Thorsteinsdottir; Kari Stefansson |
| EPI_ISL_827227, EPI_ISL_827275, EPI_ISL_827304, EPI_ISL_827313,                                                                                                                                                                                                                                                                                                                                                                                                                                                                                                                                | deCODE genetics                                                           | deCODE genetics                                                                              | Daniel F Gudbjartsson; Agnar Helgason; Hakon Jonsson; Olafur T Magnusson; Pall Melsted; Gudmundur L Norddahl; Jona Saemundsdottir; Asgeir Sigurdsson; Patrick Sulem; Arna B Agustsdottir; Hannes Eggertsson; Berglind Eiriksdoottir; Run Fridriksdottir; Elisabet E Gardarsdottir; Gudmundur                                                                                                                                                                                                                                                                                                                                                                                                                                                                                                                                       |



|                                                                                                                                                                                                                                                                                                                                                                                                                                                                                                                |                                             |                                                       |                                                                                                                                                                                                                                                                                                                                                                                                                                                                                                                                                                                                                                                                                                                                                                                                                                    |
|----------------------------------------------------------------------------------------------------------------------------------------------------------------------------------------------------------------------------------------------------------------------------------------------------------------------------------------------------------------------------------------------------------------------------------------------------------------------------------------------------------------|---------------------------------------------|-------------------------------------------------------|------------------------------------------------------------------------------------------------------------------------------------------------------------------------------------------------------------------------------------------------------------------------------------------------------------------------------------------------------------------------------------------------------------------------------------------------------------------------------------------------------------------------------------------------------------------------------------------------------------------------------------------------------------------------------------------------------------------------------------------------------------------------------------------------------------------------------------|
| EPI_ISL_829544                                                                                                                                                                                                                                                                                                                                                                                                                                                                                                 | The National University Hospital of Iceland | deCODE genetics                                       | Sveinbjornsson; Kristin E Sveinsdottir; Maney Sveinsdottir; Emil A Thorarensen; Bjarni Thorbjornsson; Gisli Masson; Ingileif Jonsdottir; Alma Moller; Thorolfur Gudnason; Karl G Kristinsson; Unnur Thorsteinsdottir; Kari Stefansson                                                                                                                                                                                                                                                                                                                                                                                                                                                                                                                                                                                              |
| EPI_ISL_829545, EPI_ISL_829604, EPI_ISL_829626, EPI_ISL_829628, EPI_ISL_829662, EPI_ISL_829663, EPI_ISL_829664, EPI_ISL_829667, EPI_ISL_829668, EPI_ISL_829669, EPI_ISL_829674, EPI_ISL_829678, EPI_ISL_829693, EPI_ISL_829694, EPI_ISL_829695, EPI_ISL_829696, EPI_ISL_829701, EPI_ISL_829702, EPI_ISL_829704, EPI_ISL_829716, EPI_ISL_829732, EPI_ISL_829761, EPI_ISL_829769, EPI_ISL_829779, EPI_ISL_829794, EPI_ISL_829903, EPI_ISL_829929, EPI_ISL_829954, EPI_ISL_829968, EPI_ISL_829973, EPI_ISL_830071 | see above                                   | deCODE genetics                                       | deCODE genetics                                                                                                                                                                                                                                                                                                                                                                                                                                                                                                                                                                                                                                                                                                                                                                                                                    |
| EPI_ISL_830121, EPI_ISL_830123, EPI_ISL_830124, EPI_ISL_830126                                                                                                                                                                                                                                                                                                                                                                                                                                                 |                                             | deCODE genetics                                       | deCODE genetics                                                                                                                                                                                                                                                                                                                                                                                                                                                                                                                                                                                                                                                                                                                                                                                                                    |
| EPI_ISL_830168                                                                                                                                                                                                                                                                                                                                                                                                                                                                                                 | The National University Hospital of Iceland | deCODE genetics                                       | Daniel F Gudbjartsson; Agnar Helgason; Hakon Jonsson; Olafur T Magnusson; Pall Melsted; Gudmundur L Norddahl; Jona Saemundsdottir; Asgeir Sigurdsson; Patrick Sulem; Arna B Agustsdottir; Hannes Eggertsson; Berglind Eiriksdtottir; Run Fridriksdottir; Elisabet E Gardarsdottir; Gudmundur Georgsson; Olafia S Gretarsdottir; Kjartan R Gudmundsson; Thora R Gunnarsdottir; Arnaldur Gylfason; Hilma Holm; Brynjar O Jensson; Aslaug Jonasdottir; Kamilla S Josefsdottir; Thordur Kristjansson; Droplaug N Magnusdottir; Solvi Rognvaldsson; Louise le Roux; Gudrun Sigmundsdottir; Gardar Sveinbjornsson; Kristin E Sveinsdottir; Maney Sveinsdottir; Emil A Thorarensen; Bjarni Thorbjornsson; Gisli Masson; Ingileif Jonsdottir; Alma Moller; Thorolfur Gudnason; Karl G Kristinsson; Unnur Thorsteinsdottir; Kari Stefansson |
| EPI_ISL_830188, EPI_ISL_830222                                                                                                                                                                                                                                                                                                                                                                                                                                                                                 |                                             | deCODE genetics                                       | deCODE genetics                                                                                                                                                                                                                                                                                                                                                                                                                                                                                                                                                                                                                                                                                                                                                                                                                    |
| EPI_ISL_830225, EPI_ISL_830229, EPI_ISL_830236, EPI_ISL_830238, EPI_ISL_830241, EPI_ISL_830243                                                                                                                                                                                                                                                                                                                                                                                                                 | KALEIDA CENTER FOR LABORATORY MEDICINE      | Wadsworth Center, New York State Department of Health | Kirsten St. George, Daryl M. Lamson, Alexis Russel, Matthew Shudt, Melissa A Leisner, Jonathan Plitnick, Navjot Singh, John Kelly, Erasmus Schneider, Erica Lasek-Nesselquist                                                                                                                                                                                                                                                                                                                                                                                                                                                                                                                                                                                                                                                      |
| EPI_ISL_830268, EPI_ISL_830305                                                                                                                                                                                                                                                                                                                                                                                                                                                                                 | The National University Hospital of Iceland | deCODE genetics                                       | Daniel F Gudbjartsson; Agnar Helgason; Hakon Jonsson; Olafur T Magnusson; Pall Melsted; Gudmundur L Norddahl; Jona Saemundsdottir; Asgeir Sigurdsson; Patrick Sulem; Arna B Agustsdottir; Hannes Eggertsson; Berglind Eiriksdtottir; Run Fridriksdottir; Elisabet E Gardarsdottir; Gudmundur Georgsson; Olafia S Gretarsdottir; Kjartan R Gudmundsson; Thora R Gunnarsdottir; Arnaldur Gylfason; Hilma Holm; Brynjar O Jensson; Aslaug Jonasdottir; Kamilla S Josefsdottir; Thordur Kristjansson; Droplaug N Magnusdottir; Solvi Rognvaldsson; Louise le Roux; Gudrun Sigmundsdottir; Gardar Sveinbjornsson; Kristin E Sveinsdottir; Maney Sveinsdottir; Emil A Thorarensen; Bjarni Thorbjornsson; Gisli Masson; Ingileif Jonsdottir; Alma Moller; Thorolfur Gudnason; Karl G Kristinsson; Unnur Thorsteinsdottir; Kari Stefansson |
| EPI_ISL_830409, EPI_ISL_830411, EPI_ISL_830412                                                                                                                                                                                                                                                                                                                                                                                                                                                                 |                                             | deCODE genetics                                       | deCODE genetics                                                                                                                                                                                                                                                                                                                                                                                                                                                                                                                                                                                                                                                                                                                                                                                                                    |
| EPI_ISL_830492                                                                                                                                                                                                                                                                                                                                                                                                                                                                                                 | The National University Hospital of Iceland | deCODE genetics                                       | Daniel F Gudbjartsson; Agnar Helgason; Hakon Jonsson; Olafur T Magnusson; Pall Melsted; Gudmundur L Norddahl; Jona Saemundsdottir; Asgeir Sigurdsson; Patrick Sulem; Arna B Agustsdottir; Hannes Eggertsson; Berglind Eiriksdtottir; Run Fridriksdottir; Elisabet E Gardarsdottir; Gudmundur Georgsson; Olafia S Gretarsdottir; Kjartan R Gudmundsson; Thora R Gunnarsdottir; Arnaldur Gylfason; Hilma Holm; Brynjar O Jensson; Aslaug Jonasdottir; Kamilla S Josefsdottir; Thordur Kristjansson; Droplaug N Magnusdottir; Solvi Rognvaldsson; Louise le Roux; Gudrun Sigmundsdottir; Gardar Sveinbjornsson; Kristin E Sveinsdottir; Maney Sveinsdottir; Emil A Thorarensen; Bjarni Thorbjornsson; Gisli Masson; Ingileif Jonsdottir; Alma Moller; Thorolfur Gudnason; Karl G Kristinsson; Unnur Thorsteinsdottir; Kari Stefansson |
| EPI_ISL_830499                                                                                                                                                                                                                                                                                                                                                                                                                                                                                                 |                                             | deCODE genetics                                       | deCODE genetics                                                                                                                                                                                                                                                                                                                                                                                                                                                                                                                                                                                                                                                                                                                                                                                                                    |
| EPI_ISL_830519                                                                                                                                                                                                                                                                                                                                                                                                                                                                                                 | The National University Hospital of Iceland | deCODE genetics                                       | Daniel F Gudbjartsson; Agnar Helgason; Hakon Jonsson; Olafur T Magnusson; Pall Melsted; Gudmundur L Norddahl; Jona Saemundsdottir; Asgeir Sigurdsson; Patrick Sulem; Arna B Agustsdottir; Hannes Eggertsson; Berglind Eiriksdtottir; Run Fridriksdottir; Elisabet E Gardarsdottir; Gudmundur Georgsson; Olafia S Gretarsdottir; Kjartan R Gudmundsson; Thora R Gunnarsdottir; Arnaldur Gylfason; Hilma Holm; Brynjar O Jensson; Aslaug Jonasdottir; Kamilla S Josefsdottir; Thordur Kristjansson; Droplaug N Magnusdottir; Solvi Rognvaldsson; Louise le Roux; Gudrun Sigmundsdottir; Gardar Sveinbjornsson; Kristin E Sveinsdottir; Maney Sveinsdottir; Emil A Thorarensen; Bjarni Thorbjornsson; Gisli Masson; Ingileif Jonsdottir; Alma Moller; Thorolfur Gudnason; Karl G Kristinsson; Unnur Thorsteinsdottir; Kari Stefansson |
| EPI_ISL_830532                                                                                                                                                                                                                                                                                                                                                                                                                                                                                                 |                                             | deCODE genetics                                       | deCODE genetics                                                                                                                                                                                                                                                                                                                                                                                                                                                                                                                                                                                                                                                                                                                                                                                                                    |
| EPI_ISL_830573, EPI_ISL_830579, EPI_ISL_830588, EPI_ISL_830589, EPI_ISL_830591, EPI_ISL_830592, EPI_ISL_830593, EPI_ISL_830595, EPI_ISL_830596, EPI_ISL_830598, EPI_ISL_830599, EPI_ISL_830603, EPI_ISL_830605, EPI_ISL_830606, EPI_ISL_830609, EPI_ISL_830610, EPI_ISL_830611, EPI_ISL_830612,                                                                                                                                                                                                                |                                             |                                                       |                                                                                                                                                                                                                                                                                                                                                                                                                                                                                                                                                                                                                                                                                                                                                                                                                                    |

|                                                                                                                                                                                                                                                                                                                                                                                                                                                                                                                                                                                                                                                                                                                                                                                                                |                                                                    |                                                                                          |                                                                                                                                                                                |  |
|----------------------------------------------------------------------------------------------------------------------------------------------------------------------------------------------------------------------------------------------------------------------------------------------------------------------------------------------------------------------------------------------------------------------------------------------------------------------------------------------------------------------------------------------------------------------------------------------------------------------------------------------------------------------------------------------------------------------------------------------------------------------------------------------------------------|--------------------------------------------------------------------|------------------------------------------------------------------------------------------|--------------------------------------------------------------------------------------------------------------------------------------------------------------------------------|--|
| EPI_ISL_830616, EPI_ISL_830621, EPI_ISL_830627                                                                                                                                                                                                                                                                                                                                                                                                                                                                                                                                                                                                                                                                                                                                                                 |                                                                    |                                                                                          |                                                                                                                                                                                |  |
| see above                                                                                                                                                                                                                                                                                                                                                                                                                                                                                                                                                                                                                                                                                                                                                                                                      | KALEIDA CENTER FOR LABORATORY MEDICINE                             | Wadsworth Center, New York State Department of Health                                    | Kirsten St. George, Daryl M. Lamson, Alexis Russel, Matthew Shudt, Melissa A Leisner, Jonathan Plitnick, Navjot Singh, John Kelly, Erasmus Schneider, Erica Lasek-Nesselquist  |  |
| EPI_ISL_830650, EPI_ISL_830651, EPI_ISL_830652, EPI_ISL_830653, EPI_ISL_830655, EPI_ISL_830658, EPI_ISL_830659, EPI_ISL_830661, EPI_ISL_830662, EPI_ISL_830666, EPI_ISL_830667, EPI_ISL_830668, EPI_ISL_830671, EPI_ISL_830672, EPI_ISL_830673, EPI_ISL_830674, EPI_ISL_830676, EPI_ISL_830677, EPI_ISL_830679, EPI_ISL_830680, EPI_ISL_830681                                                                                                                                                                                                                                                                                                                                                                                                                                                                 |                                                                    |                                                                                          |                                                                                                                                                                                |  |
| see above                                                                                                                                                                                                                                                                                                                                                                                                                                                                                                                                                                                                                                                                                                                                                                                                      | SUNY UPSTATE MEDICAL UNIVERSITY                                    | Wadsworth Center, New York State Department of Health                                    | Kirsten St. George, Daryl M. Lamson, Alexis Russel, Matthew Shudt, Melissa A Leisner, Jonathan Plitnick, Navjot Singh, John Kelly, Erasmus Schneider, Erica Lasek-Nesselquist  |  |
| EPI_ISL_830721, EPI_ISL_830723                                                                                                                                                                                                                                                                                                                                                                                                                                                                                                                                                                                                                                                                                                                                                                                 | BIO-REFERENCE LABORATORIES                                         | Wadsworth Center, New York State Department of Health                                    | Kirsten St. George, Daryl M. Lamson, Alexis Russel, Matthew Shudt, Melissa A Leisner, Jonathan Plitnick, Navjot Singh, John Kelly, Erasmus Schneider, Erica Lasek-Nesselquist  |  |
| EPI_ISL_831021, EPI_ISL_831022, EPI_ISL_831023, EPI_ISL_831024, EPI_ISL_831025, EPI_ISL_831026, EPI_ISL_831027, EPI_ISL_831028, EPI_ISL_831030, EPI_ISL_831247, EPI_ISL_831248, EPI_ISL_831249, EPI_ISL_831250, EPI_ISL_831251, EPI_ISL_831252, EPI_ISL_831253, EPI_ISL_831254, EPI_ISL_831255, EPI_ISL_831256, EPI_ISL_831257, EPI_ISL_831258, EPI_ISL_831259, EPI_ISL_831260, EPI_ISL_831261, EPI_ISL_831262, EPI_ISL_831263, EPI_ISL_831264, EPI_ISL_831265, EPI_ISL_831266, EPI_ISL_831267, EPI_ISL_831268, EPI_ISL_831269, EPI_ISL_831270, EPI_ISL_831271, EPI_ISL_831272, EPI_ISL_831273, EPI_ISL_831274, EPI_ISL_831275, EPI_ISL_831276, EPI_ISL_831277, EPI_ISL_831278, EPI_ISL_831279, EPI_ISL_831280, EPI_ISL_831281, EPI_ISL_831282, EPI_ISL_831283, EPI_ISL_831284, EPI_ISL_831285, EPI_ISL_831287 |                                                                    |                                                                                          |                                                                                                                                                                                |  |
| see above                                                                                                                                                                                                                                                                                                                                                                                                                                                                                                                                                                                                                                                                                                                                                                                                      | Hospital Universitario La Paz (Madrid)                             | SeqCOVID-SPAIN consortium/IBV(CSIC)                                                      | Fernando Lázaro-Perona, María Rodríguez-Tejedor, Elias Dahdouh, Jesús Mingorance and SeqCOVID-SPAIN consortium                                                                 |  |
| EPI_ISL_831490, EPI_ISL_831498, EPI_ISL_831500, EPI_ISL_831501, EPI_ISL_831502, EPI_ISL_831503, EPI_ISL_831575, EPI_ISL_831577, EPI_ISL_831578, EPI_ISL_831580                                                                                                                                                                                                                                                                                                                                                                                                                                                                                                                                                                                                                                                 | University of Wisconsin-Madison AIDS Vaccine Research Laboratories | University of Wisconsin-Madison AIDS Vaccine Research Laboratories                       | Gage Moreno, Katarina Braun, et al. AIDS Vaccine Research Laboratories                                                                                                         |  |
| EPI_ISL_831652, EPI_ISL_831654, EPI_ISL_831658, EPI_ISL_831659                                                                                                                                                                                                                                                                                                                                                                                                                                                                                                                                                                                                                                                                                                                                                 | Institute for Infectious Diseases, University of Bern, Switzerland | Institute for Infectious Diseases, University of Bern, Switzerland                       | Michel C Koch, Christian Baumann, Miguel A Terrazos Miani, Cora Sägesser, Pascal Bittel, Stephen L Leib, Peter Keller, Franziska Suter-Riniker, Alban Ramette                  |  |
| EPI_ISL_831749, EPI_ISL_831750, EPI_ISL_831751, EPI_ISL_831752, EPI_ISL_831757, EPI_ISL_831760, EPI_ISL_831837, EPI_ISL_831838, EPI_ISL_831839, EPI_ISL_831840, EPI_ISL_831841, EPI_ISL_831842, EPI_ISL_831844, EPI_ISL_831845, EPI_ISL_831846, EPI_ISL_831849, EPI_ISL_831850, EPI_ISL_831851, EPI_ISL_831852, EPI_ISL_831853, EPI_ISL_831854, EPI_ISL_831859, EPI_ISL_831860, EPI_ISL_831861, EPI_ISL_831862, EPI_ISL_831863, EPI_ISL_831864, EPI_ISL_831865, EPI_ISL_831868, EPI_ISL_831869, EPI_ISL_831870, EPI_ISL_831871, EPI_ISL_831872, EPI_ISL_831873, EPI_ISL_831875, EPI_ISL_831876, EPI_ISL_831877, EPI_ISL_831878, EPI_ISL_831879, EPI_ISL_831880, EPI_ISL_831881, EPI_ISL_831882, EPI_ISL_831883, EPI_ISL_831884, EPI_ISL_831886, EPI_ISL_831889, EPI_ISL_831890, EPI_ISL_831891                 |                                                                    |                                                                                          |                                                                                                                                                                                |  |
| see above                                                                                                                                                                                                                                                                                                                                                                                                                                                                                                                                                                                                                                                                                                                                                                                                      | United States Air Force School of Aerospace Medicine               | United States Air Force School of Aerospace Medicine                                     | Anthony Fries, Jennifer Meyer, William Gruner, Amanda Javorina, Sarah Purves, Clarise Starr, Elizabeth Macias                                                                  |  |
| EPI_ISL_831894                                                                                                                                                                                                                                                                                                                                                                                                                                                                                                                                                                                                                                                                                                                                                                                                 | Santa Clara County Public Health Laboratory                        | Santa Clara County Public Health Laboratory                                              | Santa Clara County Public Health Department                                                                                                                                    |  |
| EPI_ISL_831944                                                                                                                                                                                                                                                                                                                                                                                                                                                                                                                                                                                                                                                                                                                                                                                                 | ABC                                                                | The Public Health Agency of Sweden                                                       | Department of Microbiology, The Public Health Agency of Sweden                                                                                                                 |  |
| EPI_ISL_831945, EPI_ISL_831946                                                                                                                                                                                                                                                                                                                                                                                                                                                                                                                                                                                                                                                                                                                                                                                 | Klinisk mikrobiologi, virus F68                                    | The Public Health Agency of Sweden                                                       | Department of Microbiology, The Public Health Agency of Sweden                                                                                                                 |  |
| EPI_ISL_831947, EPI_ISL_831948, EPI_ISL_831949, EPI_ISL_831950, EPI_ISL_831951, EPI_ISL_831952                                                                                                                                                                                                                                                                                                                                                                                                                                                                                                                                                                                                                                                                                                                 | ABC                                                                | The Public Health Agency of Sweden                                                       | Department of Microbiology, The Public Health Agency of Sweden                                                                                                                 |  |
| EPI_ISL_831953, EPI_ISL_831954, EPI_ISL_831955, EPI_ISL_831956, EPI_ISL_831957                                                                                                                                                                                                                                                                                                                                                                                                                                                                                                                                                                                                                                                                                                                                 | Laboratoriemedicin, Klinisk mikrobiologi                           | The Public Health Agency of Sweden                                                       | Department of Microbiology, The Public Health Agency of Sweden                                                                                                                 |  |
| EPI_ISL_831958                                                                                                                                                                                                                                                                                                                                                                                                                                                                                                                                                                                                                                                                                                                                                                                                 | Klinisk mikrobiologi                                               | The Public Health Agency of Sweden                                                       | Department of Microbiology, The Public Health Agency of Sweden                                                                                                                 |  |
| EPI_ISL_831979                                                                                                                                                                                                                                                                                                                                                                                                                                                                                                                                                                                                                                                                                                                                                                                                 | Klinisk mikrobiologi, Viruslab                                     | The Public Health Agency of Sweden                                                       | Department of Microbiology, The Public Health Agency of Sweden                                                                                                                 |  |
| EPI_ISL_831980, EPI_ISL_831981                                                                                                                                                                                                                                                                                                                                                                                                                                                                                                                                                                                                                                                                                                                                                                                 | Klinisk mikrobiologi                                               | The Public Health Agency of Sweden                                                       | Department of Microbiology, The Public Health Agency of Sweden                                                                                                                 |  |
| EPI_ISL_831982, EPI_ISL_831983, EPI_ISL_831984, EPI_ISL_831985                                                                                                                                                                                                                                                                                                                                                                                                                                                                                                                                                                                                                                                                                                                                                 | ABC                                                                | The Public Health Agency of Sweden                                                       | Department of Microbiology, The Public Health Agency of Sweden                                                                                                                 |  |
| EPI_ISL_831986, EPI_ISL_831987, EPI_ISL_831988                                                                                                                                                                                                                                                                                                                                                                                                                                                                                                                                                                                                                                                                                                                                                                 | Synlab Medilab, Mikrobiologi                                       | The Public Health Agency of Sweden                                                       | Department of Microbiology, The Public Health Agency of Sweden                                                                                                                 |  |
| EPI_ISL_831989                                                                                                                                                                                                                                                                                                                                                                                                                                                                                                                                                                                                                                                                                                                                                                                                 | Laboratorium for klinisk mikrobiologi                              | The Public Health Agency of Sweden                                                       | Department of Microbiology, The Public Health Agency of Sweden                                                                                                                 |  |
| EPI_ISL_831990, EPI_ISL_831991, EPI_ISL_831992                                                                                                                                                                                                                                                                                                                                                                                                                                                                                                                                                                                                                                                                                                                                                                 | Klinisk mikrobiologi                                               | The Public Health Agency of Sweden                                                       | Department of Microbiology, The Public Health Agency of Sweden                                                                                                                 |  |
| EPI_ISL_831993, EPI_ISL_831994, EPI_ISL_831995                                                                                                                                                                                                                                                                                                                                                                                                                                                                                                                                                                                                                                                                                                                                                                 | TATAA Biocenter                                                    | The Public Health Agency of Sweden                                                       | Department of Microbiology, The Public Health Agency of Sweden                                                                                                                 |  |
| EPI_ISL_831996, EPI_ISL_831997                                                                                                                                                                                                                                                                                                                                                                                                                                                                                                                                                                                                                                                                                                                                                                                 | Klinisk mikrobiologi                                               | The Public Health Agency of Sweden                                                       | Department of Microbiology, The Public Health Agency of Sweden                                                                                                                 |  |
| EPI_ISL_831998, EPI_ISL_831999                                                                                                                                                                                                                                                                                                                                                                                                                                                                                                                                                                                                                                                                                                                                                                                 | Laboratoriemedicin, Klinisk mikrobiologi                           | The Public Health Agency of Sweden                                                       | Department of Microbiology, The Public Health Agency of Sweden                                                                                                                 |  |
| EPI_ISL_832000                                                                                                                                                                                                                                                                                                                                                                                                                                                                                                                                                                                                                                                                                                                                                                                                 | Unilabs, Mikrobiologiska laboratoriet                              | The Public Health Agency of Sweden                                                       | Department of Microbiology, The Public Health Agency of Sweden                                                                                                                 |  |
| EPI_ISL_832001, EPI_ISL_832002                                                                                                                                                                                                                                                                                                                                                                                                                                                                                                                                                                                                                                                                                                                                                                                 | Klinisk mikrobiologi                                               | The Public Health Agency of Sweden                                                       | Department of Microbiology, The Public Health Agency of Sweden                                                                                                                 |  |
| EPI_ISL_832008                                                                                                                                                                                                                                                                                                                                                                                                                                                                                                                                                                                                                                                                                                                                                                                                 | Unilabs, Mikrobiologiska laboratoriet                              | The Public Health Agency of Sweden                                                       | Department of Microbiology, The Public Health Agency of Sweden                                                                                                                 |  |
| EPI_ISL_832019                                                                                                                                                                                                                                                                                                                                                                                                                                                                                                                                                                                                                                                                                                                                                                                                 | Southern Nevada Public Health Laboratory                           | Southern Nevada Public Health Laboratory                                                 | Michael Picker, Holly Hansen, Erin Buttery, Joseph Benson                                                                                                                      |  |
| EPI_ISL_832045, EPI_ISL_832047, EPI_ISL_832048, EPI_ISL_832049, EPI_ISL_832050, EPI_ISL_832051, EPI_ISL_832052, EPI_ISL_832055, EPI_ISL_832056, EPI_ISL_832058, EPI_ISL_832060, EPI_ISL_832061, EPI_ISL_832063, EPI_ISL_832064                                                                                                                                                                                                                                                                                                                                                                                                                                                                                                                                                                                 |                                                                    |                                                                                          |                                                                                                                                                                                |  |
| see above                                                                                                                                                                                                                                                                                                                                                                                                                                                                                                                                                                                                                                                                                                                                                                                                      | Wyoming Public Health Laboratory                                   | Wyoming Public Health Laboratory                                                         | Noah Hull, Taylor Fearing, Lynette Gumbleton, Channing Weber, Ashley Norberg, Bailey Bowcutt, and Wanda Manley                                                                 |  |
| EPI_ISL_832105, EPI_ISL_832109                                                                                                                                                                                                                                                                                                                                                                                                                                                                                                                                                                                                                                                                                                                                                                                 | MD Laboratories                                                    | Los Angeles County PHL                                                                   | P. Hemarajata et al.                                                                                                                                                           |  |
| EPI_ISL_832128                                                                                                                                                                                                                                                                                                                                                                                                                                                                                                                                                                                                                                                                                                                                                                                                 | Sentinelles IDF                                                    | National Reference Center for Viruses of Respiratory Infections, Institut Pasteur, Paris | Marion Barbet, Sylvie Behillil, Méline Bizard, Angela Brisebarre, Camille Capel, Etienne Simon-Lorière, Vincent Enouf, Maud Vanpeene, Sylvie van der Werf, Patricia Lefebure   |  |
| EPI_ISL_832130, EPI_ISL_832132, EPI_ISL_832133, EPI_ISL_832134, EPI_ISL_832135, EPI_ISL_832136, EPI_ISL_832137, EPI_ISL_832138, EPI_ISL_832139, EPI_ISL_832140, EPI_ISL_832141, EPI_ISL_832142, EPI_ISL_832143                                                                                                                                                                                                                                                                                                                                                                                                                                                                                                                                                                                                 |                                                                    |                                                                                          |                                                                                                                                                                                |  |
| see above                                                                                                                                                                                                                                                                                                                                                                                                                                                                                                                                                                                                                                                                                                                                                                                                      | Hospital                                                           | National Reference Center for Viruses of Respiratory Infections, Institut Pasteur, Paris | Marion Barbet, Sylvie Behillil, Méline Bizard, Angela Brisebarre, Camille Capel, Etienne Simon-Lorière, Vincent Enouf, Maud Vanpeene, Sylvie van der Werf, Laurent Andreoletti |  |
| EPI_ISL_832160, EPI_ISL_832161, EPI_ISL_832162, EPI_ISL_832163, EPI_ISL_832164, EPI_ISL_832165, EPI_ISL_832166                                                                                                                                                                                                                                                                                                                                                                                                                                                                                                                                                                                                                                                                                                 | Hospital                                                           | National Reference Center for Viruses of Respiratory Infections, Institut Pasteur, Paris | Marion Barbet, Sylvie Behillil, Méline Bizard, Angela Brisebarre, Camille Capel, Etienne Simon-Lorière, Vincent Enouf, Maud Vanpeene, Sylvie van der Werf, Léa Pilorge         |  |
| EPI_ISL_832167                                                                                                                                                                                                                                                                                                                                                                                                                                                                                                                                                                                                                                                                                                                                                                                                 | Sentinelles Province                                               | National Reference Center for Viruses of Respiratory Infections, Institut Pasteur, Paris | Marion Barbet, Sylvie Behillil, Méline Bizard, Angela Brisebarre, Camille Capel, Etienne Simon-Lorière, Vincent Enouf, Maud Vanpeene, Sylvie van der Werf, Jean-Michel Monnier |  |
| EPI_ISL_832168                                                                                                                                                                                                                                                                                                                                                                                                                                                                                                                                                                                                                                                                                                                                                                                                 | Sentinelles Province                                               | National Reference Center for Viruses of Respiratory Infections, Institut Pasteur, Paris | Marion Barbet, Sylvie Behillil, Méline Bizard, Angela Brisebarre, Camille Capel, Etienne Simon-Lorière, Vincent Enouf, Maud Vanpeene, Sylvie van der Werf, Denis Calvet        |  |
| EPI_ISL_832171, EPI_ISL_832172,                                                                                                                                                                                                                                                                                                                                                                                                                                                                                                                                                                                                                                                                                                                                                                                | Hospital                                                           | National Reference Center for Viruses of Respiratory                                     | Marion Barbet, Sylvie Behillil, Méline Bizard, Angela Brisebarre, Camille Capel, Etienne Simon-Lorière, Vincent Enouf, Maud Vanpeene, Sylvie van der                           |  |

|                                                                                                |                         |                                                                                          |                                                                                                                                                                                        |
|------------------------------------------------------------------------------------------------|-------------------------|------------------------------------------------------------------------------------------|----------------------------------------------------------------------------------------------------------------------------------------------------------------------------------------|
| EPI_ISL_832175                                                                                 |                         | Infections, Institut Pasteur, Paris                                                      | Werf, Patricia Stoessel-Thouvenin                                                                                                                                                      |
| EPI_ISL_832176, EPI_ISL_832177                                                                 | Hospital                | National Reference Center for Viruses of Respiratory Infections, Institut Pasteur, Paris | Marion Barbet, Sylvie Behillil, Méline Bizard, Angela Brisebarre, Camille Capel, Etienne Simon-Lorière, Vincent Enouf, Maud Vanpeene, Sylvie van der Werf, Aurélie Guigon              |
| EPI_ISL_832179, EPI_ISL_832180                                                                 | Hospital                | National Reference Center for Viruses of Respiratory Infections, Institut Pasteur, Paris | Marion Barbet, Sylvie Behillil, Méline Bizard, Angela Brisebarre, Camille Capel, Etienne Simon-Lorière, Vincent Enouf, Maud Vanpeene, Sylvie van der Werf, Laurent Roudiere            |
| EPI_ISL_832182, EPI_ISL_832183, EPI_ISL_832188, EPI_ISL_832190, EPI_ISL_832191, EPI_ISL_832192 | Laboratory Analyses Med | National Reference Center for Viruses of Respiratory Infections, Institut Pasteur, Paris | Marion Barbet, Sylvie Behillil, Méline Bizard, Angela Brisebarre, Camille Capel, Etienne Simon-Lorière, Vincent Enouf, Maud Vanpeene, Sylvie van der Werf, Brieuc Leflaure             |
| EPI_ISL_832194, EPI_ISL_832195                                                                 | Laboratory Analyses Med | National Reference Center for Viruses of Respiratory Infections, Institut Pasteur, Paris | Marion Barbet, Sylvie Behillil, Méline Bizard, Angela Brisebarre, Camille Capel, Etienne Simon-Lorière, Vincent Enouf, Maud Vanpeene, Sylvie van der Werf, Brieuc Gestin               |
| EPI_ISL_832197                                                                                 | Hospital                | National Reference Center for Viruses of Respiratory Infections, Institut Pasteur, Paris | Marion Barbet, Sylvie Behillil, Méline Bizard, Angela Brisebarre, Camille Capel, Etienne Simon-Lorière, Vincent Enouf, Maud Vanpeene, Sylvie van der Werf, Esther Gyde                 |
| EPI_ISL_832201                                                                                 | Hospital                | National Reference Center for Viruses of Respiratory Infections, Institut Pasteur, Paris | Marion Barbet, Sylvie Behillil, Méline Bizard, Angela Brisebarre, Camille Capel, Etienne Simon-Lorière, Vincent Enouf, Maud Vanpeene, Sylvie van der Werf, Patricia Stoessel-Thouvenin |
| EPI_ISL_832258, EPI_ISL_832259                                                                 | DOHMH PHL               | New York City Public Health Laboratory                                                   | Jade Wang, et al.                                                                                                                                                                      |
| EPI_ISL_832261                                                                                 | DOHMH Corona            | New York City Public Health Laboratory                                                   | Jade Wang, et al.                                                                                                                                                                      |
| EPI_ISL_832263                                                                                 | DOHMH Jamaica           | New York City Public Health Laboratory                                                   | Jade Wang, et al.                                                                                                                                                                      |
| EPI_ISL_832264                                                                                 | DOHMH Morrisania        | New York City Public Health Laboratory                                                   | Jade Wang, et al.                                                                                                                                                                      |
| EPI_ISL_832266                                                                                 | DOHMH Central Harlem    | New York City Public Health Laboratory                                                   | Jade Wang, et al.                                                                                                                                                                      |
| EPI_ISL_832268                                                                                 | DOHMH Fort Greene       | New York City Public Health Laboratory                                                   | Jade Wang, et al.                                                                                                                                                                      |
| EPI_ISL_832272, EPI_ISL_832273                                                                 | DOHMH Jamaica           | New York City Public Health Laboratory                                                   | Jade Wang, et al.                                                                                                                                                                      |
| EPI_ISL_832275                                                                                 | DOHMH Crown Heights     | New York City Public Health Laboratory                                                   | Jade Wang, et al.                                                                                                                                                                      |
| EPI_ISL_832276                                                                                 | DOHMH Jamaica           | New York City Public Health Laboratory                                                   | Jade Wang, et al.                                                                                                                                                                      |
| EPI_ISL_832277, EPI_ISL_832278                                                                 | DOHMH Corona            | New York City Public Health Laboratory                                                   | Jade Wang, et al.                                                                                                                                                                      |
| EPI_ISL_832280                                                                                 | DOHMH Morrisania        | New York City Public Health Laboratory                                                   | Jade Wang, et al.                                                                                                                                                                      |
| EPI_ISL_832282                                                                                 | DOHMH Chelsea           | New York City Public Health Laboratory                                                   | Jade Wang, et al.                                                                                                                                                                      |
| EPI_ISL_832283                                                                                 | DOHMH Jamaica           | New York City Public Health Laboratory                                                   | Jade Wang, et al.                                                                                                                                                                      |
| EPI_ISL_832284                                                                                 | DOHMH Central Harlem    | New York City Public Health Laboratory                                                   | Jade Wang, et al.                                                                                                                                                                      |
| EPI_ISL_832285                                                                                 | DOHMH Morrisania        | New York City Public Health Laboratory                                                   | Jade Wang, et al.                                                                                                                                                                      |
| EPI_ISL_832286                                                                                 | DOHMH Fort Greene       | New York City Public Health Laboratory                                                   | Jade Wang, et al.                                                                                                                                                                      |
| EPI_ISL_832287, EPI_ISL_832288                                                                 | DOHMH Crown Heights     | New York City Public Health Laboratory                                                   | Jade Wang, et al.                                                                                                                                                                      |
| EPI_ISL_832289                                                                                 | DOHMH Morrisania        | New York City Public Health Laboratory                                                   | Jade Wang, et al.                                                                                                                                                                      |
| EPI_ISL_832290, EPI_ISL_832291                                                                 | DOHMH Corona            | New York City Public Health Laboratory                                                   | Jade Wang, et al.                                                                                                                                                                      |
| EPI_ISL_832292, EPI_ISL_832293                                                                 | DOHMH Crown Heights     | New York City Public Health Laboratory                                                   | Jade Wang, et al.                                                                                                                                                                      |
| EPI_ISL_832294                                                                                 | DOHMH Jamaica           | New York City Public Health Laboratory                                                   | Jade Wang, et al.                                                                                                                                                                      |
| EPI_ISL_832295                                                                                 | DOHMH Crown Heights     | New York City Public Health Laboratory                                                   | Jade Wang, et al.                                                                                                                                                                      |
| EPI_ISL_832296                                                                                 | DOHMH Riverside         | New York City Public Health Laboratory                                                   | Jade Wang, et al.                                                                                                                                                                      |
| EPI_ISL_832297, EPI_ISL_832298                                                                 | DOHMH Jamaica           | New York City Public Health Laboratory                                                   | Jade Wang, et al.                                                                                                                                                                      |
| EPI_ISL_832300                                                                                 | DOHMH Central Harlem    | New York City Public Health Laboratory                                                   | Jade Wang, et al.                                                                                                                                                                      |
| EPI_ISL_832301, EPI_ISL_832302                                                                 | DOHMH Chelsea           | New York City Public Health Laboratory                                                   | Jade Wang, et al.                                                                                                                                                                      |
| EPI_ISL_832303, EPI_ISL_832304                                                                 | DOHMH Corona            | New York City Public Health Laboratory                                                   | Jade Wang, et al.                                                                                                                                                                      |
| EPI_ISL_832308, EPI_ISL_832309, EPI_ISL_832310, EPI_ISL_832311                                 | DOHMH Jamaica           | New York City Public Health Laboratory                                                   | Jade Wang, et al.                                                                                                                                                                      |
| EPI_ISL_832315                                                                                 | DOHMH Morrisania        | New York City Public Health Laboratory                                                   | Jade Wang, et al.                                                                                                                                                                      |
| EPI_ISL_832318, EPI_ISL_832319                                                                 | DOHMH Jamaica           | New York City Public Health Laboratory                                                   | Jade Wang, et al.                                                                                                                                                                      |
| EPI_ISL_832320, EPI_ISL_832321, EPI_ISL_832322                                                 | DOHMH Corona            | New York City Public Health Laboratory                                                   | Jade Wang, et al.                                                                                                                                                                      |
| EPI_ISL_832323                                                                                 | DOHMH Jamaica           | New York City Public Health Laboratory                                                   | Jade Wang, et al.                                                                                                                                                                      |
| EPI_ISL_832325                                                                                 | DOHMH Corona            | New York City Public Health Laboratory                                                   | Jade Wang, et al.                                                                                                                                                                      |
| EPI_ISL_832326                                                                                 | DOHMH Riverside         | New York City Public Health Laboratory                                                   | Jade Wang, et al.                                                                                                                                                                      |
| EPI_ISL_832327                                                                                 | DOHMH Morrisania        | New York City Public Health Laboratory                                                   | Jade Wang, et al.                                                                                                                                                                      |
| EPI_ISL_832328, EPI_ISL_832330                                                                 | DOHMH Jamaica           | New York City Public Health Laboratory                                                   | Jade Wang, et al.                                                                                                                                                                      |
| EPI_ISL_832331, EPI_ISL_832332, EPI_ISL_832333, EPI_ISL_832334                                 | DOHMH Corona            | New York City Public Health Laboratory                                                   | Jade Wang, et al.                                                                                                                                                                      |
| EPI_ISL_832336, EPI_ISL_832337                                                                 | DOHMH Central Harlem    | New York City Public Health Laboratory                                                   | Jade Wang, et al.                                                                                                                                                                      |
| EPI_ISL_832338                                                                                 | DOHMH Crown Heights     | New York City Public Health Laboratory                                                   | Jade Wang, et al.                                                                                                                                                                      |
| EPI_ISL_832339                                                                                 | DOHMH Riverside         | New York City Public Health Laboratory                                                   | Jade Wang, et al.                                                                                                                                                                      |
| EPI_ISL_832340                                                                                 | DOHMH Crown Heights     | New York City Public Health Laboratory                                                   | Jade Wang, et al.                                                                                                                                                                      |
| EPI_ISL_832341                                                                                 | DOHMH Chelsea           | New York City Public Health Laboratory                                                   | Jade Wang, et al.                                                                                                                                                                      |
| EPI_ISL_832342, EPI_ISL_832343, EPI_ISL_832344                                                 | DOHMH Morrisania        | New York City Public Health Laboratory                                                   | Jade Wang, et al.                                                                                                                                                                      |
| EPI_ISL_832348, EPI_ISL_832349, EPI_ISL_832350                                                 | DOHMH Central Harlem    | New York City Public Health Laboratory                                                   | Jade Wang, et al.                                                                                                                                                                      |

|                                                                                                                                                                                                                                                                                                                                                                                                                                                                                                                                                                                                                                                                                                                                                                                                                                                                                                                                                                                                                                                                                                                                                                                                                                                                                                                                                                                                |                                                                                           |                                                                                           |                                                                                                                                                                                                                                                    |
|------------------------------------------------------------------------------------------------------------------------------------------------------------------------------------------------------------------------------------------------------------------------------------------------------------------------------------------------------------------------------------------------------------------------------------------------------------------------------------------------------------------------------------------------------------------------------------------------------------------------------------------------------------------------------------------------------------------------------------------------------------------------------------------------------------------------------------------------------------------------------------------------------------------------------------------------------------------------------------------------------------------------------------------------------------------------------------------------------------------------------------------------------------------------------------------------------------------------------------------------------------------------------------------------------------------------------------------------------------------------------------------------|-------------------------------------------------------------------------------------------|-------------------------------------------------------------------------------------------|----------------------------------------------------------------------------------------------------------------------------------------------------------------------------------------------------------------------------------------------------|
| EPI_ISL_832352, EPI_ISL_832353                                                                                                                                                                                                                                                                                                                                                                                                                                                                                                                                                                                                                                                                                                                                                                                                                                                                                                                                                                                                                                                                                                                                                                                                                                                                                                                                                                 | DOHMH PHL                                                                                 | New York City Public Health Laboratory                                                    | Jade Wang, et al.                                                                                                                                                                                                                                  |
| EPI_ISL_832354                                                                                                                                                                                                                                                                                                                                                                                                                                                                                                                                                                                                                                                                                                                                                                                                                                                                                                                                                                                                                                                                                                                                                                                                                                                                                                                                                                                 | DOHMH Jamaica                                                                             | New York City Public Health Laboratory                                                    | Jade Wang, et al.                                                                                                                                                                                                                                  |
| EPI_ISL_832355, EPI_ISL_832356                                                                                                                                                                                                                                                                                                                                                                                                                                                                                                                                                                                                                                                                                                                                                                                                                                                                                                                                                                                                                                                                                                                                                                                                                                                                                                                                                                 | DOHMH Corona                                                                              | New York City Public Health Laboratory                                                    | Jade Wang, et al.                                                                                                                                                                                                                                  |
| EPI_ISL_832357, EPI_ISL_832358, EPI_ISL_832361                                                                                                                                                                                                                                                                                                                                                                                                                                                                                                                                                                                                                                                                                                                                                                                                                                                                                                                                                                                                                                                                                                                                                                                                                                                                                                                                                 | DOHMH Jamaica                                                                             | New York City Public Health Laboratory                                                    | Jade Wang, et al.                                                                                                                                                                                                                                  |
| EPI_ISL_832363                                                                                                                                                                                                                                                                                                                                                                                                                                                                                                                                                                                                                                                                                                                                                                                                                                                                                                                                                                                                                                                                                                                                                                                                                                                                                                                                                                                 | DOHMH Chelsea                                                                             | New York City Public Health Laboratory                                                    | Jade Wang, et al.                                                                                                                                                                                                                                  |
| EPI_ISL_832368, EPI_ISL_832370, EPI_ISL_832371, EPI_ISL_832372                                                                                                                                                                                                                                                                                                                                                                                                                                                                                                                                                                                                                                                                                                                                                                                                                                                                                                                                                                                                                                                                                                                                                                                                                                                                                                                                 | Center of Medical Microbiology, Virology, and Hospital Hygiene, University of Duesseldorf | Center of Medical Microbiology, Virology, and Hospital Hygiene, University of Duesseldorf | Maximilian Damagnez, Alexander Dilthey, Ashley-Jane Duplessis, Torsten Houwaart, Lisanna Hülse, Malte Kohns Vasconcelos, Nadine Lübke, Jessica Nicolai, Klaus Pfeiffer, Daniel Strelow, Teresa Tamayo, Jörg Timm, Andreas Walker, Tobias Wienemann |
| EPI_ISL_832394, EPI_ISL_832395, EPI_ISL_832402, EPI_ISL_832403                                                                                                                                                                                                                                                                                                                                                                                                                                                                                                                                                                                                                                                                                                                                                                                                                                                                                                                                                                                                                                                                                                                                                                                                                                                                                                                                 | Santa Clara County Public Health Laboratory                                               | Santa Clara County Public Health Laboratory                                               | Santa Clara County Public Health Department                                                                                                                                                                                                        |
| EPI_ISL_832815, EPI_ISL_832816                                                                                                                                                                                                                                                                                                                                                                                                                                                                                                                                                                                                                                                                                                                                                                                                                                                                                                                                                                                                                                                                                                                                                                                                                                                                                                                                                                 | SIESP CHIETI - DRIVE IN LANCIANO                                                          | Istituto Zooprofilattico Sperimentale dell'Abruzzo e Molise "G.Caporale"                  | Lorusso A, Marcacci M, Di Domenico M, Curini V, Ancora M, Cammà C, Rinaldi A, Mangone I, Di Pasquale A, Puglia I, Calistri P, Savini G.                                                                                                            |
| EPI_ISL_832818                                                                                                                                                                                                                                                                                                                                                                                                                                                                                                                                                                                                                                                                                                                                                                                                                                                                                                                                                                                                                                                                                                                                                                                                                                                                                                                                                                                 | Ospedale Civile Atri                                                                      | Istituto Zooprofilattico Sperimentale dell'Abruzzo e Molise "G.Caporale"                  | Lorusso A, Marcacci M, Di Domenico M, Curini V, Ancora M, Cammà C, Rinaldi A, Mangone I, Di Pasquale A, Puglia I, Calistri P, Savini G.                                                                                                            |
| EPI_ISL_832820                                                                                                                                                                                                                                                                                                                                                                                                                                                                                                                                                                                                                                                                                                                                                                                                                                                                                                                                                                                                                                                                                                                                                                                                                                                                                                                                                                                 | Medico Competente P.O. L'Aquila                                                           | Istituto Zooprofilattico Sperimentale dell'Abruzzo e Molise "G.Caporale"                  | Lorusso A, Marcacci M, Di Domenico M, Curini V, Ancora M, Cammà C, Rinaldi A, Mangone I, Di Pasquale A, Puglia I, Calistri P, Savini G.                                                                                                            |
| EPI_ISL_832821                                                                                                                                                                                                                                                                                                                                                                                                                                                                                                                                                                                                                                                                                                                                                                                                                                                                                                                                                                                                                                                                                                                                                                                                                                                                                                                                                                                 | SIESP CHIETI - DRIVE IN CHIETI                                                            | Istituto Zooprofilattico Sperimentale dell'Abruzzo e Molise "G.Caporale"                  | Lorusso A, Marcacci M, Di Domenico M, Curini V, Ancora M, Cammà C, Rinaldi A, Mangone I, Di Pasquale A, Puglia I, Calistri P, Savini G.                                                                                                            |
| EPI_ISL_832823, EPI_ISL_832826, EPI_ISL_832828, EPI_ISL_832829, EPI_ISL_832830, EPI_ISL_832831, EPI_ISL_832832, EPI_ISL_832833, EPI_ISL_832834, EPI_ISL_832837, EPI_ISL_832838, EPI_ISL_832839, EPI_ISL_832843, EPI_ISL_832845, EPI_ISL_832846, EPI_ISL_832848, EPI_ISL_832849, EPI_ISL_832850, EPI_ISL_832852, EPI_ISL_832853, EPI_ISL_832854, EPI_ISL_832855, EPI_ISL_832858, EPI_ISL_832860, EPI_ISL_832862, EPI_ISL_832863, EPI_ISL_832865, EPI_ISL_832868, EPI_ISL_832885, EPI_ISL_832886, EPI_ISL_832887, EPI_ISL_832888, EPI_ISL_832889, EPI_ISL_832890, EPI_ISL_832895, EPI_ISL_832896, EPI_ISL_832897, EPI_ISL_832898, EPI_ISL_832899, EPI_ISL_832900, EPI_ISL_832901, EPI_ISL_832902, EPI_ISL_832904, EPI_ISL_832905, EPI_ISL_832906, EPI_ISL_832907, EPI_ISL_832908, EPI_ISL_832909, EPI_ISL_832910, EPI_ISL_832911, EPI_ISL_832912, EPI_ISL_832914, EPI_ISL_832918, EPI_ISL_832919, EPI_ISL_832922, EPI_ISL_832924, EPI_ISL_832925, EPI_ISL_832926, EPI_ISL_832927, EPI_ISL_832928, EPI_ISL_832929, EPI_ISL_832931, EPI_ISL_832933, EPI_ISL_832934, EPI_ISL_832936, EPI_ISL_832937, EPI_ISL_832938, EPI_ISL_832939, EPI_ISL_832941, EPI_ISL_832943, EPI_ISL_832948, EPI_ISL_832949, EPI_ISL_832950, EPI_ISL_832951, EPI_ISL_832954, EPI_ISL_832955, EPI_ISL_832956, EPI_ISL_832957, EPI_ISL_832960, EPI_ISL_832961, EPI_ISL_832962, EPI_ISL_832963, EPI_ISL_832964, EPI_ISL_832966 |                                                                                           |                                                                                           |                                                                                                                                                                                                                                                    |
| see above                                                                                                                                                                                                                                                                                                                                                                                                                                                                                                                                                                                                                                                                                                                                                                                                                                                                                                                                                                                                                                                                                                                                                                                                                                                                                                                                                                                      | Maine HETL                                                                                | Tewhey Lab, The Jackson Laboratory                                                        | Matluk,N., Dewey,H., Isoue,F., Barter,M., Lynch,R., Munger,H. and Tewhey,R.                                                                                                                                                                        |
| EPI_ISL_833044                                                                                                                                                                                                                                                                                                                                                                                                                                                                                                                                                                                                                                                                                                                                                                                                                                                                                                                                                                                                                                                                                                                                                                                                                                                                                                                                                                                 | SIESP CHIETI - DRIVE IN CHIETI                                                            | Istituto Zooprofilattico Sperimentale dell'Abruzzo e Molise "G. Caporale"                 | Lorusso A, Marcacci M, Di Domenico M, Ancora M, Curini V, Mangone I, Rinaldi A, Delli Compagni E, Di Pasquale A, Cammà C, Puglia I, Calistri P, Savini G                                                                                           |
| EPI_ISL_833045                                                                                                                                                                                                                                                                                                                                                                                                                                                                                                                                                                                                                                                                                                                                                                                                                                                                                                                                                                                                                                                                                                                                                                                                                                                                                                                                                                                 | SIESP CHIETI - DRIVE IN ORTONA                                                            | Istituto Zooprofilattico Sperimentale dell'Abruzzo e Molise "G. Caporale"                 | Lorusso A, Marcacci M, Di Domenico M, Ancora M, Curini V, Mangone I, Rinaldi A, Delli Compagni E, Di Pasquale A, Cammà C, Puglia I, Calistri P, Savini G                                                                                           |
| EPI_ISL_833046                                                                                                                                                                                                                                                                                                                                                                                                                                                                                                                                                                                                                                                                                                                                                                                                                                                                                                                                                                                                                                                                                                                                                                                                                                                                                                                                                                                 | FPAM                                                                                      | Istituto Zooprofilattico Sperimentale dell'Abruzzo e Molise "G. Caporale"                 | Lorusso A, Marcacci M, Di Domenico M, Ancora M, Curini V, Mangone I, Rinaldi A, Delli Compagni E, Di Pasquale A, Cammà C, Puglia I, Calistri P, Savini G                                                                                           |
| EPI_ISL_833047, EPI_ISL_833048                                                                                                                                                                                                                                                                                                                                                                                                                                                                                                                                                                                                                                                                                                                                                                                                                                                                                                                                                                                                                                                                                                                                                                                                                                                                                                                                                                 | OSPEDALE CIVILE ATRI                                                                      | Istituto Zooprofilattico Sperimentale dell'Abruzzo e Molise "G. Caporale"                 | Lorusso A, Marcacci M, Di Domenico M, Ancora M, Curini V, Mangone I, Rinaldi A, Delli Compagni E, Di Pasquale A, Cammà C, Puglia I, Calistri P, Savini G                                                                                           |
| EPI_ISL_833052, EPI_ISL_833053, EPI_ISL_833054                                                                                                                                                                                                                                                                                                                                                                                                                                                                                                                                                                                                                                                                                                                                                                                                                                                                                                                                                                                                                                                                                                                                                                                                                                                                                                                                                 | "Presidio Ospedaliero "San Liberatore" Atri                                               | Istituto Zooprofilattico Sperimentale dell'Abruzzo e Molise "G. Caporale"                 | Lorusso A, Marcacci M, Di Domenico M, Ancora M, Curini V, Mangone I, Rinaldi A, Delli Compagni E, Di Pasquale A, Cammà C, Puglia I, Calistri P, Savini G                                                                                           |
| EPI_ISL_833057, EPI_ISL_833058, EPI_ISL_833059, EPI_ISL_833060, EPI_ISL_833063, EPI_ISL_833064, EPI_ISL_833065, EPI_ISL_833066, EPI_ISL_833067                                                                                                                                                                                                                                                                                                                                                                                                                                                                                                                                                                                                                                                                                                                                                                                                                                                                                                                                                                                                                                                                                                                                                                                                                                                 | DIP. PREV. AVEZZANO SERVIZIO DI IGIENE EPIDEMIOLOGIAE SANITA' PUBBLICA                    | Istituto Zooprofilattico Sperimentale dell'Abruzzo e Molise "G. Caporale"                 | Lorusso A, Marcacci M, Di Domenico M, Ancora M, Curini V, Mangone I, Rinaldi A, Delli Compagni E, Di Pasquale A, Cammà C, Puglia I, Calistri P, Savini G                                                                                           |
| EPI_ISL_833071, EPI_ISL_833072, EPI_ISL_833073, EPI_ISL_833075                                                                                                                                                                                                                                                                                                                                                                                                                                                                                                                                                                                                                                                                                                                                                                                                                                                                                                                                                                                                                                                                                                                                                                                                                                                                                                                                 | FPAM                                                                                      | Istituto Zooprofilattico Sperimentale dell'Abruzzo e Molise "G. Caporale"                 | Lorusso A, Marcacci M, Di Domenico M, Ancora M, Curini V, Mangone I, Rinaldi A, Delli Compagni E, Di Pasquale A, Cammà C, Puglia I, Calistri P, Savini G                                                                                           |
| EPI_ISL_833077                                                                                                                                                                                                                                                                                                                                                                                                                                                                                                                                                                                                                                                                                                                                                                                                                                                                                                                                                                                                                                                                                                                                                                                                                                                                                                                                                                                 | OSPEDALE CIVILE ATRI                                                                      | Istituto Zooprofilattico Sperimentale dell'Abruzzo e Molise "G. Caporale"                 | Lorusso A, Marcacci M, Di Domenico M, Ancora M, Curini V, Mangone I, Rinaldi A, Delli Compagni E, Di Pasquale A, Cammà C, Puglia I, Calistri P, Savini G                                                                                           |
| EPI_ISL_833081                                                                                                                                                                                                                                                                                                                                                                                                                                                                                                                                                                                                                                                                                                                                                                                                                                                                                                                                                                                                                                                                                                                                                                                                                                                                                                                                                                                 | OSPEDALE S.S. ANNUNZIATA CHIETI                                                           | Istituto Zooprofilattico Sperimentale dell'Abruzzo e Molise "G. Caporale"                 | Lorusso A, Marcacci M, Di Domenico M, Ancora M, Curini V, Mangone I, Rinaldi A, Delli Compagni E, Di Pasquale A, Cammà C, Puglia I, Calistri P, Savini G                                                                                           |
| EPI_ISL_833082                                                                                                                                                                                                                                                                                                                                                                                                                                                                                                                                                                                                                                                                                                                                                                                                                                                                                                                                                                                                                                                                                                                                                                                                                                                                                                                                                                                 | OSPEDALE SAN SALVATORE                                                                    | Istituto Zooprofilattico Sperimentale dell'Abruzzo e Molise "G. Caporale"                 | Lorusso A, Marcacci M, Di Domenico M, Ancora M, Curini V, Mangone I, Rinaldi A, Delli Compagni E, Di Pasquale A, Cammà C, Puglia I, Calistri P, Savini G                                                                                           |
| EPI_ISL_833084                                                                                                                                                                                                                                                                                                                                                                                                                                                                                                                                                                                                                                                                                                                                                                                                                                                                                                                                                                                                                                                                                                                                                                                                                                                                                                                                                                                 | RPS                                                                                       | Istituto Zooprofilattico Sperimentale dell'Abruzzo e Molise "G. Caporale"                 | Lorusso A, Marcacci M, Di Domenico M, Ancora M, Curini V, Mangone I, Rinaldi A, Delli Compagni E, Di Pasquale A, Cammà C, Puglia I, Calistri P, Savini G                                                                                           |
| EPI_ISL_833085, EPI_ISL_833086                                                                                                                                                                                                                                                                                                                                                                                                                                                                                                                                                                                                                                                                                                                                                                                                                                                                                                                                                                                                                                                                                                                                                                                                                                                                                                                                                                 | Servizio di Igiene Epidemiologia e Sanità Pubblica (SIESP) CHIETI - DRIVE IN GISSI        | Istituto Zooprofilattico Sperimentale dell'Abruzzo e Molise "G. Caporale"                 | Lorusso A, Marcacci M, Di Domenico M, Ancora M, Curini V, Mangone I, Rinaldi A, Delli Compagni E, Di Pasquale A, Cammà C, Puglia I, Calistri P, Savini G                                                                                           |
| EPI_ISL_833087                                                                                                                                                                                                                                                                                                                                                                                                                                                                                                                                                                                                                                                                                                                                                                                                                                                                                                                                                                                                                                                                                                                                                                                                                                                                                                                                                                                 | Servizio di Igiene Epidemiologia e Sanità Pubblica (SIESP) L'AQUILA                       | Istituto Zooprofilattico Sperimentale dell'Abruzzo e Molise "G. Caporale"                 | Lorusso A, Marcacci M, Di Domenico M, Ancora M, Curini V, Mangone I, Rinaldi A, Delli Compagni E, Di Pasquale A, Cammà C, Puglia I, Calistri P, Savini G                                                                                           |
| EPI_ISL_833088, EPI_ISL_833089                                                                                                                                                                                                                                                                                                                                                                                                                                                                                                                                                                                                                                                                                                                                                                                                                                                                                                                                                                                                                                                                                                                                                                                                                                                                                                                                                                 | Servizio di Igiene Epidemiologia e Sanità Pubblica (SIESP) SULMONA                        | Istituto Zooprofilattico Sperimentale dell'Abruzzo e Molise "G. Caporale"                 | Lorusso A, Marcacci M, Di Domenico M, Ancora M, Curini V, Mangone I, Rinaldi A, Delli Compagni E, Di Pasquale A, Cammà C, Puglia I, Calistri P, Savini G                                                                                           |
| EPI_ISL_833090, EPI_ISL_833091, EPI_ISL_833093, EPI_ISL_833095, EPI_ISL_833096                                                                                                                                                                                                                                                                                                                                                                                                                                                                                                                                                                                                                                                                                                                                                                                                                                                                                                                                                                                                                                                                                                                                                                                                                                                                                                                 | SIESP CHIETI - DRIVE IN CHIETI                                                            | Istituto Zooprofilattico Sperimentale dell'Abruzzo e Molise "G. Caporale"                 | Lorusso A, Marcacci M, Di Domenico M, Ancora M, Curini V, Mangone I, Rinaldi A, Delli Compagni E, Di Pasquale A, Cammà C, Puglia I, Calistri P, Savini G                                                                                           |
| EPI_ISL_833097, EPI_ISL_833098                                                                                                                                                                                                                                                                                                                                                                                                                                                                                                                                                                                                                                                                                                                                                                                                                                                                                                                                                                                                                                                                                                                                                                                                                                                                                                                                                                 | SIESP CHIETI - DRIVE IN LANCIANO                                                          | Istituto Zooprofilattico Sperimentale dell'Abruzzo e Molise "G. Caporale"                 | Lorusso A, Marcacci M, Di Domenico M, Ancora M, Curini V, Mangone I, Rinaldi A, Delli Compagni E, Di Pasquale A, Cammà C, Puglia I, Calistri P, Savini G                                                                                           |
| EPI_ISL_833101, EPI_ISL_833102                                                                                                                                                                                                                                                                                                                                                                                                                                                                                                                                                                                                                                                                                                                                                                                                                                                                                                                                                                                                                                                                                                                                                                                                                                                                                                                                                                 | SIESP DIPARTIMENTO DI PREVENZIONE CHIETI                                                  | Istituto Zooprofilattico Sperimentale dell'Abruzzo e Molise "G. Caporale"                 | Lorusso A, Marcacci M, Di Domenico M, Ancora M, Curini V, Mangone I, Rinaldi A, Delli Compagni E, Di Pasquale A, Cammà C, Puglia I, Calistri P, Savini G                                                                                           |
| EPI_ISL_833103, EPI_ISL_833108, EPI_ISL_833111, EPI_ISL_833112, EPI_ISL_833113, EPI_ISL_833114, EPI_ISL_833116, EPI_ISL_833117                                                                                                                                                                                                                                                                                                                                                                                                                                                                                                                                                                                                                                                                                                                                                                                                                                                                                                                                                                                                                                                                                                                                                                                                                                                                 | SIESP DIPARTIMENTO DI PREVENZIONE TERAMO C.DA CASALENA                                    | Istituto Zooprofilattico Sperimentale dell'Abruzzo e Molise "G. Caporale"                 | Lorusso A, Marcacci M, Di Domenico M, Ancora M, Curini V, Mangone I, Rinaldi A, Delli Compagni E, Di Pasquale A, Cammà C, Puglia I, Calistri P, Savini G                                                                                           |
| EPI_ISL_833120                                                                                                                                                                                                                                                                                                                                                                                                                                                                                                                                                                                                                                                                                                                                                                                                                                                                                                                                                                                                                                                                                                                                                                                                                                                                                                                                                                                 | SIESP SULMONA                                                                             | Istituto Zooprofilattico Sperimentale dell'Abruzzo e Molise "G. Caporale"                 | Lorusso A, Marcacci M, Di Domenico M, Ancora M, Curini V, Mangone I, Rinaldi A, Delli Compagni E, Di Pasquale A, Cammà C, Puglia I, Calistri P, Savini G                                                                                           |
| EPI_ISL_833123                                                                                                                                                                                                                                                                                                                                                                                                                                                                                                                                                                                                                                                                                                                                                                                                                                                                                                                                                                                                                                                                                                                                                                                                                                                                                                                                                                                 | Usca Pizzoli                                                                              | Istituto Zooprofilattico Sperimentale dell'Abruzzo e Molise "G. Caporale"                 | Lorusso A, Marcacci M, Di Domenico M, Ancora M, Curini V, Mangone I, Rinaldi A, Delli Compagni E, Di Pasquale A, Cammà C, Puglia I, Calistri P, Savini G                                                                                           |
| EPI_ISL_833124, EPI_ISL_833126                                                                                                                                                                                                                                                                                                                                                                                                                                                                                                                                                                                                                                                                                                                                                                                                                                                                                                                                                                                                                                                                                                                                                                                                                                                                                                                                                                 | USCA Sulmona                                                                              | Istituto Zooprofilattico Sperimentale dell'Abruzzo e Molise "G.                           | Lorusso A, Marcacci M, Di Domenico M, Ancora M, Curini V, Mangone I, Rinaldi A, Delli Compagni E, Di Pasquale A, Cammà C, Puglia I, Calistri P, Savini                                                                                             |









|                                                                                                                                                                                                                                                                                                                                                                                                                                                |                                                                                                                                        |                                                                                                                                        |                                                                                                                                                                                                                                                                                                                                                                                                                                                                                                                                                                                 |
|------------------------------------------------------------------------------------------------------------------------------------------------------------------------------------------------------------------------------------------------------------------------------------------------------------------------------------------------------------------------------------------------------------------------------------------------|----------------------------------------------------------------------------------------------------------------------------------------|----------------------------------------------------------------------------------------------------------------------------------------|---------------------------------------------------------------------------------------------------------------------------------------------------------------------------------------------------------------------------------------------------------------------------------------------------------------------------------------------------------------------------------------------------------------------------------------------------------------------------------------------------------------------------------------------------------------------------------|
| EPI_ISL_847760, EPI_ISL_847761, EPI_ISL_847763, EPI_ISL_847764, EPI_ISL_847765, EPI_ISL_847766, EPI_ISL_847767, EPI_ISL_847768, EPI_ISL_847769, EPI_ISL_847770, EPI_ISL_847772, EPI_ISL_847773, EPI_ISL_847777, EPI_ISL_847778, EPI_ISL_847779, EPI_ISL_847781, EPI_ISL_847784, EPI_ISL_847785, EPI_ISL_847787, EPI_ISL_847790, EPI_ISL_847791, EPI_ISL_847792, EPI_ISL_847793, EPI_ISL_847794, EPI_ISL_847797, EPI_ISL_847798, EPI_ISL_847801 |                                                                                                                                        |                                                                                                                                        |                                                                                                                                                                                                                                                                                                                                                                                                                                                                                                                                                                                 |
| see above                                                                                                                                                                                                                                                                                                                                                                                                                                      | California Department of Public Health                                                                                                 | Chiu Laboratory, University of California, San Francisco                                                                               | Charles Chiu, Xiangding (Wayne) Deng, Candace Wang, Brian Bushnell, Scot Federman, Jill Hacker, Debra Wadford                                                                                                                                                                                                                                                                                                                                                                                                                                                                   |
| EPI_ISL_847921, EPI_ISL_847922, EPI_ISL_847923, EPI_ISL_847924, EPI_ISL_847925, EPI_ISL_847926, EPI_ISL_847928, EPI_ISL_847955, EPI_ISL_847957, EPI_ISL_847958, EPI_ISL_847959, EPI_ISL_847960, EPI_ISL_847961, EPI_ISL_847962, EPI_ISL_847965, EPI_ISL_847966, EPI_ISL_847967, EPI_ISL_847968, EPI_ISL_847969, EPI_ISL_847970, EPI_ISL_847971, EPI_ISL_847972, EPI_ISL_847974, EPI_ISL_847975, EPI_ISL_847976                                 |                                                                                                                                        |                                                                                                                                        |                                                                                                                                                                                                                                                                                                                                                                                                                                                                                                                                                                                 |
| see above                                                                                                                                                                                                                                                                                                                                                                                                                                      | University Hospitals of Geneva, Laboratory of Virology                                                                                 | HUG, Laboratory of Virology and the Health2030 Genome Center                                                                           | Samuel Cordey, Ana Rita Goncalves, Laurent Kaiser, Lorenzo Cerutti, Henri Pegeot, Melyssa Elies, Keith Harshman, Ioannis Xenarios, Emmanouil Dermitzakis                                                                                                                                                                                                                                                                                                                                                                                                                        |
| EPI_ISL_848189, EPI_ISL_848190, EPI_ISL_848193, EPI_ISL_848194, EPI_ISL_848196, EPI_ISL_848197, EPI_ISL_848198                                                                                                                                                                                                                                                                                                                                 | Microbiology Lab                                                                                                                       | NBCC Sequencing Facility                                                                                                               | Dr. Jeff Wrana                                                                                                                                                                                                                                                                                                                                                                                                                                                                                                                                                                  |
| EPI_ISL_848458, EPI_ISL_848459, EPI_ISL_848533, EPI_ISL_848534, EPI_ISL_848536, EPI_ISL_848537, EPI_ISL_848539, EPI_ISL_848543, EPI_ISL_848544, EPI_ISL_848545                                                                                                                                                                                                                                                                                 | Illinois Department of Public Health                                                                                                   | Gagnon Lab, Southern Illinois University                                                                                               | Keith Gagnon                                                                                                                                                                                                                                                                                                                                                                                                                                                                                                                                                                    |
| EPI_ISL_848671, EPI_ISL_848672, EPI_ISL_848673, EPI_ISL_848680, EPI_ISL_848697, EPI_ISL_848699                                                                                                                                                                                                                                                                                                                                                 | Florida Bureau of Public Health Laboratories                                                                                           | Florida Bureau of Public Health Laboratories                                                                                           | Sarah Schmedes, Jason Blanton                                                                                                                                                                                                                                                                                                                                                                                                                                                                                                                                                   |
| EPI_ISL_849560, EPI_ISL_849616, EPI_ISL_849617, EPI_ISL_849625, EPI_ISL_849626, EPI_ISL_849629                                                                                                                                                                                                                                                                                                                                                 | Washington State Department of Health                                                                                                  | Seattle Flu Study                                                                                                                      | Deborah A. Nickerson, Chris D. Frazier, Jover Lee, Benjamin Pelle, Matthew Richardson, Amanda Adler, Elisabeth Brandstetter, Peter D. Han, Kairsten Fay, Misja Ilcisin, Kirsten Lacombe, Thomas R. Sibley, Melissa Truong, Caitlin R. Wolf, Romesh Gautom, Geoff Melly, Brian Hiatt, Philip Dykema, Scott Lindquist, Michael Boeckh, Janet A. Englund, Michael Famulare, Barry R. Lutz, Mark J. Rieder, Lea M. Starita, Matthew Thompson, Helen Y. Chu, Jay Shendure, Trevor Bedford                                                                                            |
| EPI_ISL_849634                                                                                                                                                                                                                                                                                                                                                                                                                                 | SIESP DIPARTIMENTO DI PREVENZIONE CHIETI                                                                                               | Istituto Zooprofilattico Sperimentale dell'Abruzzo e Molise "G.Caporale"                                                               | Lorusso A, Marcacci M, Di Domenico M, Curini V, Ancora M, Cammà C, Rinaldi A, Mangone I, Di Pasquale A, Puglia I, Savini G.                                                                                                                                                                                                                                                                                                                                                                                                                                                     |
| EPI_ISL_849635                                                                                                                                                                                                                                                                                                                                                                                                                                 | DIPARTIMENTO PREVENZIONE AVEZZANO-SERVIZIO DI IGIENE EPIDEMIOLOGIA E SANITA' PUBBLICA                                                  | Istituto Zooprofilattico Sperimentale dell'Abruzzo e Molise "G.Caporale"                                                               | Lorusso A, Marcacci M, Di Domenico M, Curini V, Ancora M, Cammà C, Rinaldi A, Mangone I, Di Pasquale A, Puglia I, Savini G.                                                                                                                                                                                                                                                                                                                                                                                                                                                     |
| EPI_ISL_849640, EPI_ISL_849641, EPI_ISL_849642, EPI_ISL_849643, EPI_ISL_849646                                                                                                                                                                                                                                                                                                                                                                 | SIESP DIPARTIMENTO DI PREVENZIONE CHIETI                                                                                               | Istituto Zooprofilattico Sperimentale dell'Abruzzo e Molise "G.Caporale"                                                               | Lorusso A, Marcacci M, Di Domenico M, Curini V, Ancora M, Cammà C, Rinaldi A, Mangone I, Di Pasquale A, Puglia I, Savini G.                                                                                                                                                                                                                                                                                                                                                                                                                                                     |
| EPI_ISL_849647, EPI_ISL_849648, EPI_ISL_849649                                                                                                                                                                                                                                                                                                                                                                                                 | SIESP- DRIVE IN CHIETI                                                                                                                 | Istituto Zooprofilattico Sperimentale dell'Abruzzo e Molise "G.Caporale"                                                               | Lorusso A, Marcacci M, Di Domenico M, Curini V, Ancora M, Cammà C, Rinaldi A, Mangone I, Di Pasquale A, Puglia I, Savini G.                                                                                                                                                                                                                                                                                                                                                                                                                                                     |
| EPI_ISL_849749                                                                                                                                                                                                                                                                                                                                                                                                                                 | Public Health Virology Laboratory, Forensic and Scientific Services (PHV-FSS)                                                          | Public Health Virology Laboratory, Forensic and Scientific Services (PHV-FSS)                                                          | Son Nguyen et al                                                                                                                                                                                                                                                                                                                                                                                                                                                                                                                                                                |
| EPI_ISL_849806, EPI_ISL_849807, EPI_ISL_849808, EPI_ISL_849809, EPI_ISL_849811, EPI_ISL_849812, EPI_ISL_849815, EPI_ISL_849819, EPI_ISL_849820, EPI_ISL_849823, EPI_ISL_849829, EPI_ISL_849833, EPI_ISL_849839, EPI_ISL_849840, EPI_ISL_849849, EPI_ISL_849852, EPI_ISL_849855                                                                                                                                                                 |                                                                                                                                        |                                                                                                                                        |                                                                                                                                                                                                                                                                                                                                                                                                                                                                                                                                                                                 |
| see above                                                                                                                                                                                                                                                                                                                                                                                                                                      | A. Krumbholz, Labor Dr. Krause und Kollegen MVZ GmbH, Kiel                                                                             | Charité Universitätsmedizin Berlin, Institut für Virologie                                                                             | Victor M Corman, Jörn Beheim-Schwarzbach, Talitha Veith, Julia Schneider, Tobias Bleicker, Julia Tesch, Barbara Mühlemann, Terry Jones, Christian Drosten                                                                                                                                                                                                                                                                                                                                                                                                                       |
| EPI_ISL_849974, EPI_ISL_849978, EPI_ISL_849981, EPI_ISL_849982, EPI_ISL_849983, EPI_ISL_849989, EPI_ISL_849997                                                                                                                                                                                                                                                                                                                                 | Santa Clara County Public Health Laboratory                                                                                            | Chan-Zuckerberg Biohub                                                                                                                 | CZB Cliahub Consortium                                                                                                                                                                                                                                                                                                                                                                                                                                                                                                                                                          |
| EPI_ISL_850152                                                                                                                                                                                                                                                                                                                                                                                                                                 | Renegade                                                                                                                               | Chan-Zuckerberg Biohub                                                                                                                 | CZB Cliahub Consortium                                                                                                                                                                                                                                                                                                                                                                                                                                                                                                                                                          |
| EPI_ISL_850508                                                                                                                                                                                                                                                                                                                                                                                                                                 | Hospital de Tortosa Verge de la Cinta                                                                                                  | Hospital Universitari Vall d'Hebron - Vall d'Hebron Institut de Recerca                                                                | Cristina Andrés, Maria Piñana, Josep F Abril, Damir Garcia-Cehic, Ariadna Rando, Juliana Esperalba, Maria Gema Codina, Carla Castillo, Maria Carmen Martín, Tomás Pumarola, Josep Quer, Andrés Antón                                                                                                                                                                                                                                                                                                                                                                            |
| EPI_ISL_850657, EPI_ISL_850662                                                                                                                                                                                                                                                                                                                                                                                                                 | Division of Emerging Infectious Diseases, Bureau of Infectious Diseases Diagnosis Control, Korea Disease Control and Prevention Agency | Division of Emerging Infectious Diseases, Bureau of Infectious Diseases Diagnosis Control, Korea Disease Control and Prevention Agency | Ae Kyung Park, Il-Hwan Kim, Heui Man Kim, Jeong-Min Kim, Namjoo Lee, Chaeyoung Lee, Sang Hee Woo, Eun-Jin Kim                                                                                                                                                                                                                                                                                                                                                                                                                                                                   |
| EPI_ISL_850665, EPI_ISL_850667, EPI_ISL_850670, EPI_ISL_850675                                                                                                                                                                                                                                                                                                                                                                                 | The National Institute of Public Health                                                                                                | State Veterinary Institute Prague                                                                                                      | Nagy,A,Jirincova,H;Trnka,D;Vecerova,J;Trinklova,M                                                                                                                                                                                                                                                                                                                                                                                                                                                                                                                               |
| EPI_ISL_850942                                                                                                                                                                                                                                                                                                                                                                                                                                 | Helix / Illumina                                                                                                                       | Genomics and Discovery, Respiratory Viruses Branch, Division of Viral Diseases, Centers for Disease Control and Prevention             | Peter W. Cook, Dhvani Batra, Ben L. Rambo-Martin Eileen de Feo, Jan Antico, Christine Tran, Matthew Tolentino, Shannon Wickline, Kim Gietzen, Brad Sickler, Jingtao Liu, Eric Allen, Phil Febbo, Summer Galloway, Nicole L. Washington, Simon White, Geraint Levan, Kelly Schiabor Barrett, Elizabeth Cirulli, Alexandre Bolze, Ary Ascencio, Charlotte Rivera-Garcia, Ryan Cho, Jason Nguyen, Sherry Wang, Jimmy Ramirez, Tyler Cassens, Efrén Sandoval, Magnus Isaksson, William Lee, David Becker, Marc Laurent, James Lu, Clinton R. Paden, Suxiang Tong, Duncan MacCannell |
| EPI_ISL_851034                                                                                                                                                                                                                                                                                                                                                                                                                                 | Helix/Illumina                                                                                                                         | Genomics and Discovery, Respiratory Viruses Branch, Division of Viral Diseases, Centers for Disease Control and Prevention             | Peter W. Cook, Dhvani Batra, Ben L. Rambo-Martin Eileen de Feo, Jan Antico, Christine Tran, Matthew Tolentino, Shannon Wickline, Kim Gietzen, Brad Sickler, Jingtao Liu, Eric Allen, Phil Febbo, Summer Galloway, Nicole L. Washington, Simon White, Geraint Levan, Kelly Schiabor Barrett, Elizabeth Cirulli, Alexandre Bolze, Ary Ascencio, Charlotte Rivera-Garcia, Ryan Cho, Jason Nguyen, Sherry Wang, Jimmy Ramirez, Tyler Cassens, Efrén Sandoval, Magnus Isaksson, William Lee, David Becker, Marc Laurent, James Lu, Clinton R. Paden, Suxiang Tong, Duncan MacCannell |
| EPI_ISL_852017                                                                                                                                                                                                                                                                                                                                                                                                                                 | Lighthouse Lab in Milton Keynes                                                                                                        | Wellcome Sanger Institute for the COVID-19 Genomics UK (COG-UK) Consortium                                                             | The Lighthouse Lab in Milton Keynes and Alex Alderton, Roberto Amato, Sonia Goncalves, Ewan Harrison, David K. Jackson, Ian Johnston, Dominic Kwiatkowski, Cordelia Langford, John Sillitoe on behalf of the Wellcome Sanger Institute COVID-19 Surveillance Team                                                                                                                                                                                                                                                                                                               |
| EPI_ISL_852833                                                                                                                                                                                                                                                                                                                                                                                                                                 | Microbiology Lab                                                                                                                       | NBCC Sequencing Facility                                                                                                               | Dr. Jeff Wrana                                                                                                                                                                                                                                                                                                                                                                                                                                                                                                                                                                  |
| EPI_ISL_852842                                                                                                                                                                                                                                                                                                                                                                                                                                 | Laboratory of Molecular Biology, Diagnostyka sp. z o.o.                                                                                | genXone SA, Research & Development Laboratory                                                                                          | Maciej Sykulski, Grzegorz Nowicki, Jakub Grabowski, Natalia Drwska-Matelska, ukasz Krych, Micha Kaszuba                                                                                                                                                                                                                                                                                                                                                                                                                                                                         |
| EPI_ISL_853402                                                                                                                                                                                                                                                                                                                                                                                                                                 | Charité Universitätsmedizin Berlin, Institut für Virologie/Labor Berlin                                                                | Charité Universitätsmedizin Berlin, Institut für Virologie                                                                             | Victor M Corman, Julia Schneider, Barbara Mühlemann, Jörn Beheim-Schwarzbach, Talitha Veith, Julia Tesch, Tobias Bleicker, Terry Jones, Christian Drosten                                                                                                                                                                                                                                                                                                                                                                                                                       |
| EPI_ISL_855354                                                                                                                                                                                                                                                                                                                                                                                                                                 | Hospital                                                                                                                               | National Reference Center for Viruses of Respiratory Infections, Institut Pasteur, Paris                                               | Marion Barbet, Sylvie Behillil, Méline Bizard, Angela Brisebarre, Camille Capel, Etienne Simon-Lorière, Vincent Enouf, Maud Vanpeene, Sylvie van der Werf                                                                                                                                                                                                                                                                                                                                                                                                                       |
| EPI_ISL_855388                                                                                                                                                                                                                                                                                                                                                                                                                                 | Hospital                                                                                                                               | National Reference Center for Viruses of Respiratory Infections, Institut Pasteur, Paris                                               | Marion Barbet, Sylvie Behillil, Méline Bizard, Angela Brisebarre, Camille Capel, Etienne Simon-Lorière, Vincent Enouf, Maud Vanpeene, Sylvie van der Werf,Ducancelle Alexandra                                                                                                                                                                                                                                                                                                                                                                                                  |
| EPI_ISL_855556, EPI_ISL_855573, EPI_ISL_855610, EPI_ISL_855612, EPI_ISL_855613, EPI_ISL_855614                                                                                                                                                                                                                                                                                                                                                 | Lab. Microbiologia e Virologia, Cotugno, A.O. dei Colli                                                                                | Lab. Microbiologia e Virologia, Cotugno, A.O. dei Colli                                                                                | Luigi Atripaldi, Claudia Tiberio, Anna Perfetti                                                                                                                                                                                                                                                                                                                                                                                                                                                                                                                                 |
| EPI_ISL_855910, EPI_ISL_855912, EPI_ISL_855916, EPI_ISL_855919, EPI_ISL_855921, EPI_ISL_855928,                                                                                                                                                                                                                                                                                                                                                | Lab voor klinische biologie                                                                                                            | Onderzoeksgroep Virologie                                                                                                              | Laurens Lambrechts, Nick Vereecke, Marthe Pauwels, Bruno Verhasselt, Linos Vandekerckhove, Hans Nauwynck, Sebastiaan Theuns                                                                                                                                                                                                                                                                                                                                                                                                                                                     |

|                                                                                                                                                                                                                                                                                                                                                                                                                                                                                                                                                                                                                                |                                                                                                          |                                                                                                                              |                                                                                                                                                                                         |
|--------------------------------------------------------------------------------------------------------------------------------------------------------------------------------------------------------------------------------------------------------------------------------------------------------------------------------------------------------------------------------------------------------------------------------------------------------------------------------------------------------------------------------------------------------------------------------------------------------------------------------|----------------------------------------------------------------------------------------------------------|------------------------------------------------------------------------------------------------------------------------------|-----------------------------------------------------------------------------------------------------------------------------------------------------------------------------------------|
| EPI_ISL_855932, EPI_ISL_855934                                                                                                                                                                                                                                                                                                                                                                                                                                                                                                                                                                                                 |                                                                                                          |                                                                                                                              |                                                                                                                                                                                         |
| EPI_ISL_855942                                                                                                                                                                                                                                                                                                                                                                                                                                                                                                                                                                                                                 | Lab voor klinische biologie                                                                              | Onderzoeksgroep Virologie                                                                                                    | Nick Vereecke, Laurens Lambrechts, Marthe Pauwels, Bruno Verhasselt, Linos Vandekerckhove, Hans Nauwynck, Sebastiaan Theuns                                                             |
| EPI_ISL_856613, EPI_ISL_856614, EPI_ISL_856618, EPI_ISL_856622, EPI_ISL_856624, EPI_ISL_856628, EPI_ISL_856629, EPI_ISL_856631, EPI_ISL_856632, EPI_ISL_856633, EPI_ISL_856634, EPI_ISL_856635, EPI_ISL_856636, EPI_ISL_856637, EPI_ISL_856638, EPI_ISL_856639, EPI_ISL_856640, EPI_ISL_856641, EPI_ISL_856642, EPI_ISL_856643, EPI_ISL_856645, EPI_ISL_856646, EPI_ISL_856647, EPI_ISL_856649, EPI_ISL_856650, EPI_ISL_856654, EPI_ISL_856655, EPI_ISL_856656, EPI_ISL_856658, EPI_ISL_856659, EPI_ISL_856660, EPI_ISL_856663, EPI_ISL_856666, EPI_ISL_856669, EPI_ISL_856671, EPI_ISL_856672, EPI_ISL_856675, EPI_ISL_856676 |                                                                                                          |                                                                                                                              |                                                                                                                                                                                         |
| see above                                                                                                                                                                                                                                                                                                                                                                                                                                                                                                                                                                                                                      | Department of Virus and Microbiological Special Diagnostics, Statens Serum Institut, Copenhagen, Denmark | Aalborg University                                                                                                           | Danish Covid-19 Genome Consortium                                                                                                                                                       |
| EPI_ISL_856681, EPI_ISL_856683                                                                                                                                                                                                                                                                                                                                                                                                                                                                                                                                                                                                 | Charité Universitätsmedizin Berlin, Institute of Virology, Charitéplatz 1, 10117 Berlin, Germany         | Charité Universitätsmedizin Berlin, Institute of Virology, Charitéplatz 1, 10117 Berlin, Germany                             | Victor M Corman, Julia Schneider, Jörn Beheim-Schwarzbach, Tobias Bleicker, Julia Tesch, Barbara Mühlemann, Talitha Veith, Terry Jones, Christian Drosten                               |
| EPI_ISL_856696, EPI_ISL_856697, EPI_ISL_856699, EPI_ISL_856702, EPI_ISL_856755                                                                                                                                                                                                                                                                                                                                                                                                                                                                                                                                                 | Ohio Department of Health Laboratory                                                                     | Ohio Department of Health Laboratory                                                                                         | Holmes, Jennifer; Eric Brandt, Keoni Omura, Glen McGillivray, Caitlin McDonnell, Kirtana Ramadugu, Erica Leasure, Kelsey Florek, Heather Blankenship, Quanta Brown, and Tammy Bannerman |
| EPI_ISL_856757, EPI_ISL_856759, EPI_ISL_856774, EPI_ISL_856777, EPI_ISL_856778, EPI_ISL_856781, EPI_ISL_856784, EPI_ISL_856786, EPI_ISL_856787, EPI_ISL_856789                                                                                                                                                                                                                                                                                                                                                                                                                                                                 | Servicio Virosis Respiratorias-Departamento Virología-INEI                                               | Instituto Nacional Enfermedades Infecciosas C.G.Malbran                                                                      | Baumeister E., Avaro M., Benedetti E., Russo M., Dattero ME, Pontoriero A., Cisterna D., Molina V., Perandones C., Tuduri E., Lorenzo F., Poklepovich T., Campos J.                     |
| EPI_ISL_856910, EPI_ISL_856911                                                                                                                                                                                                                                                                                                                                                                                                                                                                                                                                                                                                 | National Institute of Public Health - National Institute of Hygiene                                      | National Institute of Public Health - National Institute of Hygiene                                                          | Wokowicz Tomasz, Zacharczuk Katarzyna, Gawor Jan                                                                                                                                        |
| EPI_ISL_857052, EPI_ISL_857055                                                                                                                                                                                                                                                                                                                                                                                                                                                                                                                                                                                                 | Platform BIS UZA/UAntwerpen, University Hospital Antwerp, Edegem, Belgium                                | UAntwerp, Laboratory of Medical Microbiology, Campus Drie Eiken S6.26, Universiteitsplein 1, 2610, Wilrijk, Antwerp, Belgium | Basil Britto Xavier, Jasmine Coppens, Christine Lammens, Veerle Matheussen, Herman Goossens                                                                                             |
| EPI_ISL_857057, EPI_ISL_857058                                                                                                                                                                                                                                                                                                                                                                                                                                                                                                                                                                                                 | OCME Office Of Chief Medical Examiner                                                                    | New York City Public Health Laboratory                                                                                       | Jade Wang, et al.                                                                                                                                                                       |
| EPI_ISL_857202                                                                                                                                                                                                                                                                                                                                                                                                                                                                                                                                                                                                                 | DOHMH PHL                                                                                                | New York City Public Health Laboratory                                                                                       | Jade Wang, et al.                                                                                                                                                                       |
| EPI_ISL_857204, EPI_ISL_857205                                                                                                                                                                                                                                                                                                                                                                                                                                                                                                                                                                                                 | DOHMH Central Harlem                                                                                     | New York City Public Health Laboratory                                                                                       | Jade Wang, et al.                                                                                                                                                                       |
| EPI_ISL_857228                                                                                                                                                                                                                                                                                                                                                                                                                                                                                                                                                                                                                 | DOHMH Riverside                                                                                          | New York City Public Health Laboratory                                                                                       | Jade Wang, et al.                                                                                                                                                                       |
| EPI_ISL_857229                                                                                                                                                                                                                                                                                                                                                                                                                                                                                                                                                                                                                 | DOHMH Morrisania                                                                                         | New York City Public Health Laboratory                                                                                       | Jade Wang, et al.                                                                                                                                                                       |
| EPI_ISL_857230                                                                                                                                                                                                                                                                                                                                                                                                                                                                                                                                                                                                                 | DOHMH Chelsea                                                                                            | New York City Public Health Laboratory                                                                                       | Jade Wang, et al.                                                                                                                                                                       |
| EPI_ISL_857231, EPI_ISL_857232, EPI_ISL_857233                                                                                                                                                                                                                                                                                                                                                                                                                                                                                                                                                                                 | DOHMH Central Harlem                                                                                     | New York City Public Health Laboratory                                                                                       | Jade Wang, et al.                                                                                                                                                                       |
| EPI_ISL_857234, EPI_ISL_857235, EPI_ISL_857236, EPI_ISL_857237                                                                                                                                                                                                                                                                                                                                                                                                                                                                                                                                                                 | DOHMH Jamaica                                                                                            | New York City Public Health Laboratory                                                                                       | Jade Wang, et al.                                                                                                                                                                       |
| EPI_ISL_857238, EPI_ISL_857239, EPI_ISL_857240                                                                                                                                                                                                                                                                                                                                                                                                                                                                                                                                                                                 | DOHMH Corona                                                                                             | New York City Public Health Laboratory                                                                                       | Jade Wang, et al.                                                                                                                                                                       |
| EPI_ISL_857241, EPI_ISL_857242, EPI_ISL_857243, EPI_ISL_857244, EPI_ISL_857245, EPI_ISL_857246, EPI_ISL_857247, EPI_ISL_857248, EPI_ISL_857249, EPI_ISL_857250                                                                                                                                                                                                                                                                                                                                                                                                                                                                 | DOHMH Jamaica                                                                                            | New York City Public Health Laboratory                                                                                       | Jade Wang, et al.                                                                                                                                                                       |
| EPI_ISL_857251, EPI_ISL_857252                                                                                                                                                                                                                                                                                                                                                                                                                                                                                                                                                                                                 | DOHMH Morrisania                                                                                         | New York City Public Health Laboratory                                                                                       | Jade Wang, et al.                                                                                                                                                                       |
| EPI_ISL_857253, EPI_ISL_857254                                                                                                                                                                                                                                                                                                                                                                                                                                                                                                                                                                                                 | DOHMH Chelsea                                                                                            | New York City Public Health Laboratory                                                                                       | Jade Wang, et al.                                                                                                                                                                       |
| EPI_ISL_857255                                                                                                                                                                                                                                                                                                                                                                                                                                                                                                                                                                                                                 | DOHMH Central Harlem                                                                                     | New York City Public Health Laboratory                                                                                       | Jade Wang, et al.                                                                                                                                                                       |
| EPI_ISL_857256                                                                                                                                                                                                                                                                                                                                                                                                                                                                                                                                                                                                                 | DOHMH Fort Greene                                                                                        | New York City Public Health Laboratory                                                                                       | Jade Wang, et al.                                                                                                                                                                       |
| EPI_ISL_857258                                                                                                                                                                                                                                                                                                                                                                                                                                                                                                                                                                                                                 | DOHMH Central Harlem                                                                                     | New York City Public Health Laboratory                                                                                       | Jade Wang, et al.                                                                                                                                                                       |
| EPI_ISL_857262                                                                                                                                                                                                                                                                                                                                                                                                                                                                                                                                                                                                                 | DOHMH Chelsea                                                                                            | New York City Public Health Laboratory                                                                                       | Jade Wang, et al.                                                                                                                                                                       |
| EPI_ISL_857265                                                                                                                                                                                                                                                                                                                                                                                                                                                                                                                                                                                                                 | DOHMH Fort Greene                                                                                        | New York City Public Health Laboratory                                                                                       | Jade Wang, et al.                                                                                                                                                                       |
| EPI_ISL_857266                                                                                                                                                                                                                                                                                                                                                                                                                                                                                                                                                                                                                 | DOHMH PHL                                                                                                | New York City Public Health Laboratory                                                                                       | Jade Wang, et al.                                                                                                                                                                       |
| EPI_ISL_857267, EPI_ISL_857268, EPI_ISL_857269                                                                                                                                                                                                                                                                                                                                                                                                                                                                                                                                                                                 | DOHMH Jamaica                                                                                            | New York City Public Health Laboratory                                                                                       | Jade Wang, et al.                                                                                                                                                                       |
| EPI_ISL_857271, EPI_ISL_857272, EPI_ISL_857273                                                                                                                                                                                                                                                                                                                                                                                                                                                                                                                                                                                 | DOHMH Morrisania                                                                                         | New York City Public Health Laboratory                                                                                       | Jade Wang, et al.                                                                                                                                                                       |
| EPI_ISL_857276                                                                                                                                                                                                                                                                                                                                                                                                                                                                                                                                                                                                                 | DOHMH Jamaica                                                                                            | New York City Public Health Laboratory                                                                                       | Jade Wang, et al.                                                                                                                                                                       |
| EPI_ISL_857277                                                                                                                                                                                                                                                                                                                                                                                                                                                                                                                                                                                                                 | DOHMH Corona                                                                                             | New York City Public Health Laboratory                                                                                       | Jade Wang, et al.                                                                                                                                                                       |
| EPI_ISL_857278                                                                                                                                                                                                                                                                                                                                                                                                                                                                                                                                                                                                                 | DOHMH PHL                                                                                                | New York City Public Health Laboratory                                                                                       | Jade Wang, et al.                                                                                                                                                                       |
| EPI_ISL_857280                                                                                                                                                                                                                                                                                                                                                                                                                                                                                                                                                                                                                 | DOHMH Fort Greene                                                                                        | New York City Public Health Laboratory                                                                                       | Jade Wang, et al.                                                                                                                                                                       |
| EPI_ISL_857282, EPI_ISL_857283                                                                                                                                                                                                                                                                                                                                                                                                                                                                                                                                                                                                 | DOHMH Morrisania                                                                                         | New York City Public Health Laboratory                                                                                       | Jade Wang, et al.                                                                                                                                                                       |
| EPI_ISL_857284                                                                                                                                                                                                                                                                                                                                                                                                                                                                                                                                                                                                                 | DOHMH PHL                                                                                                | New York City Public Health Laboratory                                                                                       | Jade Wang, et al.                                                                                                                                                                       |
| EPI_ISL_857287, EPI_ISL_857288, EPI_ISL_857293                                                                                                                                                                                                                                                                                                                                                                                                                                                                                                                                                                                 | Department of Homeless Services                                                                          | New York City Public Health Laboratory                                                                                       | Jade Wang, et al.                                                                                                                                                                       |
| EPI_ISL_857295, EPI_ISL_857297                                                                                                                                                                                                                                                                                                                                                                                                                                                                                                                                                                                                 | OCME Office Of Chief Medical Examiner                                                                    | New York City Public Health Laboratory                                                                                       | Jade Wang, et al.                                                                                                                                                                       |
| EPI_ISL_857298                                                                                                                                                                                                                                                                                                                                                                                                                                                                                                                                                                                                                 | Department of Homeless Services                                                                          | New York City Public Health Laboratory                                                                                       | Jade Wang, et al.                                                                                                                                                                       |
| EPI_ISL_857300                                                                                                                                                                                                                                                                                                                                                                                                                                                                                                                                                                                                                 | OCME Office Of Chief Medical Examiner                                                                    | New York City Public Health Laboratory                                                                                       | Jade Wang, et al.                                                                                                                                                                       |
| EPI_ISL_857301                                                                                                                                                                                                                                                                                                                                                                                                                                                                                                                                                                                                                 | Department of Homeless Services                                                                          | New York City Public Health Laboratory                                                                                       | Jade Wang, et al.                                                                                                                                                                       |
| EPI_ISL_857302, EPI_ISL_857303, EPI_ISL_857304                                                                                                                                                                                                                                                                                                                                                                                                                                                                                                                                                                                 | OCME Office Of Chief Medical Examiner                                                                    | New York City Public Health Laboratory                                                                                       | Jade Wang, et al.                                                                                                                                                                       |
| EPI_ISL_857306                                                                                                                                                                                                                                                                                                                                                                                                                                                                                                                                                                                                                 | Department of Homeless Services                                                                          | New York City Public Health Laboratory                                                                                       | Jade Wang, et al.                                                                                                                                                                       |
| EPI_ISL_857307                                                                                                                                                                                                                                                                                                                                                                                                                                                                                                                                                                                                                 | OCME Office Of Chief Medical Examiner                                                                    | New York City Public Health Laboratory                                                                                       | Jade Wang, et al.                                                                                                                                                                       |

[illegible]

[illegible]

[illegible]

[illegible]



[illegible]



|                                                                                                                                                                                                                                                                                                                                                                                                |                                                                                                                     |                                                                                              |                                                                                                                                                                                                                                                                                                  |
|------------------------------------------------------------------------------------------------------------------------------------------------------------------------------------------------------------------------------------------------------------------------------------------------------------------------------------------------------------------------------------------------|---------------------------------------------------------------------------------------------------------------------|----------------------------------------------------------------------------------------------|--------------------------------------------------------------------------------------------------------------------------------------------------------------------------------------------------------------------------------------------------------------------------------------------------|
| EPI_ISL_860081, EPI_ISL_860082, EPI_ISL_860083, EPI_ISL_860084, EPI_ISL_860085, EPI_ISL_860086, EPI_ISL_860087, EPI_ISL_860088, EPI_ISL_860089, EPI_ISL_860090, EPI_ISL_860091                                                                                                                                                                                                                 |                                                                                                                     |                                                                                              |                                                                                                                                                                                                                                                                                                  |
| see above                                                                                                                                                                                                                                                                                                                                                                                      | BTC, Khalifa University                                                                                             | BTC, Khalifa University                                                                      | Al Safar et al                                                                                                                                                                                                                                                                                   |
| EPI_ISL_860175, EPI_ISL_860176, EPI_ISL_860179, EPI_ISL_860180, EPI_ISL_860181                                                                                                                                                                                                                                                                                                                 | Keio University School of Medicine                                                                                  | Keio University School of Medicine                                                           | Kenjiro Kosaki, Yuka Iwasaki, Hirotsugu Ishizu, Haruhiko Siomi, Kodai Abe                                                                                                                                                                                                                        |
| EPI_ISL_860182, EPI_ISL_860183                                                                                                                                                                                                                                                                                                                                                                 | Bangalore Medical College and Research Institute                                                                    | Department of Neurovirology, National Institute of Mental Health and Neurosciences (NIMHANS) | Chitra Pattabiraman, Pramada Prasad, Anson Kunjumon George, Risha Rasheed, Darshan Sreenivas, Nakka Vijay Kiran Reddy, Anita S Desai, V Ravi                                                                                                                                                     |
| EPI_ISL_860203, EPI_ISL_860204, EPI_ISL_860205                                                                                                                                                                                                                                                                                                                                                 | Lab. Microbiologia e Virologia, Cotugno, A.O. dei Colli                                                             | Lab. Microbiologia e Virologia, Cotugno, A.O. dei Colli                                      | Luigi Atripaldi, Claudia Tiberio, Anna Perfetti                                                                                                                                                                                                                                                  |
| EPI_ISL_860208                                                                                                                                                                                                                                                                                                                                                                                 | Haukeland University Hospital, Dept. of Microbiology                                                                | Norwegian Institute of Public Health, Department of Virology                                 | Kathrine Stene-Johansen, Kamilla Heddeland Instefjord, Hilde Elshaug, Atiya R Ali,Marie Paulsen Madsen, Rasmus Riis Kopperud, Hilde Vollan, Karoline Bragstad, Olav Hungnes                                                                                                                      |
| EPI_ISL_860209                                                                                                                                                                                                                                                                                                                                                                                 | Norwegian Institute of Public Health, Department of Virology                                                        | Norwegian Institute of Public Health, Department of Virology                                 | Kathrine Stene-Johansen, Kamilla Heddeland Instefjord, Hilde Elshaug, Atiya R Ali,Marie Paulsen Madsen, Rasmus Riis Kopperud, Hilde Vollan, Karoline Bragstad, Olav Hungnes                                                                                                                      |
| EPI_ISL_860211                                                                                                                                                                                                                                                                                                                                                                                 | Haukeland University Hospital, Dept. of Microbiology                                                                | Norwegian Institute of Public Health, Department of Virology                                 | Kathrine Stene-Johansen, Kamilla Heddeland Instefjord, Hilde Elshaug, Atiya R Ali,Marie Paulsen Madsen, Rasmus Riis Kopperud, Hilde Vollan, Karoline Bragstad, Olav Hungnes                                                                                                                      |
| EPI_ISL_860213                                                                                                                                                                                                                                                                                                                                                                                 | Furst Medical Laboratory                                                                                            | Norwegian Institute of Public Health, Department of Virology                                 | Kathrine Stene-Johansen, Kamilla Heddeland Instefjord, Hilde Elshaug, Atiya R Ali,Marie Paulsen Madsen, Rasmus Riis Kopperud, Hilde Vollan, Karoline Bragstad, Olav Hungnes                                                                                                                      |
| EPI_ISL_860214                                                                                                                                                                                                                                                                                                                                                                                 | Hospital of Southern Norway - Kristiansand, Department of Medical Microbiology                                      | Norwegian Institute of Public Health, Department of Virology                                 | Kathrine Stene-Johansen, Kamilla Heddeland Instefjord, Hilde Elshaug, Atiya R Ali,Marie Paulsen Madsen, Rasmus Riis Kopperud, Hilde Vollan, Karoline Bragstad, Olav Hungnes                                                                                                                      |
| EPI_ISL_860220, EPI_ISL_860221                                                                                                                                                                                                                                                                                                                                                                 | Oslo University Hospital, Department of Medical Microbiology                                                        | Norwegian Institute of Public Health, Department of Virology                                 | Kathrine Stene-Johansen, Kamilla Heddeland Instefjord, Hilde Elshaug, Atiya R Ali,Marie Paulsen Madsen, Rasmus Riis Kopperud, Hilde Vollan, Karoline Bragstad, Olav Hungnes                                                                                                                      |
| EPI_ISL_860222                                                                                                                                                                                                                                                                                                                                                                                 | Hospital of Southern Norway - Kristiansand, Department of Medical Microbiology                                      | Norwegian Institute of Public Health, Department of Virology                                 | Kathrine Stene-Johansen, Kamilla Heddeland Instefjord, Hilde Elshaug, Atiya R Ali,Marie Paulsen Madsen, Rasmus Riis Kopperud, Hilde Vollan, Karoline Bragstad, Olav Hungnes                                                                                                                      |
| EPI_ISL_860223                                                                                                                                                                                                                                                                                                                                                                                 | Akershus University Hospital, Department for Microbiology and Infectious Disease Control                            | Norwegian Institute of Public Health, Department of Virology                                 | Kathrine Stene-Johansen, Kamilla Heddeland Instefjord, Hilde Elshaug, Atiya R Ali,Marie Paulsen Madsen, Rasmus Riis Kopperud, Hilde Vollan, Karoline Bragstad, Olav Hungnes                                                                                                                      |
| EPI_ISL_860226, EPI_ISL_860227, EPI_ISL_860228                                                                                                                                                                                                                                                                                                                                                 | Innlandet Hospital Trust, Division Lillehammer, Department for Medical Microbiology                                 | Norwegian Institute of Public Health, Department of Virology                                 | Kathrine Stene-Johansen, Kamilla Heddeland Instefjord, Hilde Elshaug, Atiya R Ali,Marie Paulsen Madsen, Rasmus Riis Kopperud, Hilde Vollan, Karoline Bragstad, Olav Hungnes                                                                                                                      |
| EPI_ISL_860229, EPI_ISL_860230                                                                                                                                                                                                                                                                                                                                                                 | Ostfold Hospital Trust - Kalnes, Centre for Laboratory Medicine, Section for gene technology and infection serology | Norwegian Institute of Public Health, Department of Virology                                 | Kathrine Stene-Johansen, Kamilla Heddeland Instefjord, Hilde Elshaug, Atiya R Ali,Marie Paulsen Madsen, Rasmus Riis Kopperud, Hilde Vollan, Karoline Bragstad, Olav Hungnes                                                                                                                      |
| EPI_ISL_860231                                                                                                                                                                                                                                                                                                                                                                                 | Vestfold Hospital, Toensberg Department of Microbiology                                                             | Norwegian Institute of Public Health, Department of Virology                                 | Kathrine Stene-Johansen, Kamilla Heddeland Instefjord, Hilde Elshaug, Atiya R Ali,Marie Paulsen Madsen, Rasmus Riis Kopperud, Hilde Vollan, Karoline Bragstad, Olav Hungnes                                                                                                                      |
| EPI_ISL_860247                                                                                                                                                                                                                                                                                                                                                                                 | University Hospitals of Geneva, Laboratory of Virology                                                              | HUG, Laboratory of Virology and Universit tsspital Basel                                     | Samuel Cordey, Ana Rita Goncalves, Laurent Kaiser, Tim Roloff, Madlen Stange, Helena MB Seth-Smith, Alfredo Mari, Karoline Leuzinger, Julia Bielicki, Manuel Battegay, Hans Hirsch, Adrian Egli                                                                                                  |
| EPI_ISL_860257, EPI_ISL_860290, EPI_ISL_860297                                                                                                                                                                                                                                                                                                                                                 | Lab. Microbiologia e Virologia, Cotugno, A.O. dei Colli                                                             | Lab. Microbiologia e Virologia, Cotugno, A.O. dei Colli                                      | Luigi Atripaldi, Claudia Tiberio, Anna Perfetti                                                                                                                                                                                                                                                  |
| EPI_ISL_860638, EPI_ISL_860687                                                                                                                                                                                                                                                                                                                                                                 | Respiratory Virus Unit, National Infection Service, Public Health England                                           | COVID-19 Genomics UK (COG-UK) Consortium                                                     | PHE Covid Sequencing Team                                                                                                                                                                                                                                                                        |
| EPI_ISL_860791, EPI_ISL_860792, EPI_ISL_860795, EPI_ISL_860796, EPI_ISL_860819                                                                                                                                                                                                                                                                                                                 | Ohio Department of Health Laboratory                                                                                | Ohio Department of Health Laboratory                                                         | Holmes, Jennifer; Eric Brandt, Keoni Omura, Glen McGillivray, Caitlin McDonnell, Kirtana Ramadugu, Erica Leasure, Kelsey Florek, Heather Blankenship, Quanta Brown, and Tammy Bannerman                                                                                                          |
| EPI_ISL_860869, EPI_ISL_860883                                                                                                                                                                                                                                                                                                                                                                 | Labo Analyses Med                                                                                                   | National Reference Center for Viruses of Respiratory Infections, Institut Pasteur, Paris     | Marion Barbet, Sylvie Behillil, M line Bizard, Angela Brisebarre, Camille Capel, Etienne Simon-Lori re, Vincent Enouf, Maud Vanpeene, Sylvie van der Werf,Lefaire Brieuc                                                                                                                         |
| EPI_ISL_860898                                                                                                                                                                                                                                                                                                                                                                                 | Centre Hospitalier Compi gne-Noyon - Laboratoire                                                                    | National Reference Center for Viruses of Respiratory Infections, Institut Pasteur, Paris     | Marion Barbet, Sylvie Behillil, M line Bizard, Angela Brisebarre, Camille Capel, Etienne Simon-Lori re, Vincent Enouf, Maud Vanpeene, Sylvie van der Werf,Emond Jean-Philippe                                                                                                                    |
| EPI_ISL_860899                                                                                                                                                                                                                                                                                                                                                                                 | HOPITAL PAUL BROUSSE - Service Microbiologie                                                                        | National Reference Center for Viruses of Respiratory Infections, Institut Pasteur, Paris     | Marion Barbet, Sylvie Behillil, M line Bizard, Angela Brisebarre, Camille Capel, Etienne Simon-Lori re, Vincent Enouf, Maud Vanpeene, Sylvie van der Werf,Roque-Afonso Anne-Marie                                                                                                                |
| EPI_ISL_860946, EPI_ISL_860950, EPI_ISL_860957, EPI_ISL_860958, EPI_ISL_860969, EPI_ISL_861026, EPI_ISL_861101, EPI_ISL_861103                                                                                                                                                                                                                                                                 | Johns Hopkins Hospital Department of Pathology                                                                      | Johns Hopkins Hospital Department of Pathology                                               | C. Paul Morris, Chun Huai Luo, Adannaya Amadi, Nicholas Gallagher, Heba H. Mostafa                                                                                                                                                                                                               |
| EPI_ISL_861105                                                                                                                                                                                                                                                                                                                                                                                 | Ohio Department of Health Laboratory                                                                                | Ohio Department of Health Laboratory                                                         | Holmes, Jennifer; Eric Brandt, Keoni Omura, Glen McGillivray, Caitlin McDonnell, Kirtana Ramadugu, Erica Leasure, Kelsey Florek, Heather Blankenship, Quanta Brown, and Tammy Bannerman                                                                                                          |
| EPI_ISL_861134                                                                                                                                                                                                                                                                                                                                                                                 | KALEIDA CENTER FOR LABORATORY MEDICINE                                                                              | Wadsworth Center, New York State Department of Health                                        | Kirsten St. George, Daryl M. Lamson, Alexis Russel, Matthew Shudt, Melissa A Leisner, Jonathan Plitnick, Navjot Singh, John Kelly, Erasmus Schneider, Erica Lasek-Nesselquist                                                                                                                    |
| EPI_ISL_861136, EPI_ISL_861137, EPI_ISL_861138, EPI_ISL_861142                                                                                                                                                                                                                                                                                                                                 | ADIRONDACK MEDICAL CENTER                                                                                           | Wadsworth Center, New York State Department of Health                                        | Kirsten St. George, Daryl M. Lamson, Alexis Russel, Matthew Shudt, Melissa A Leisner, Jonathan Plitnick, Navjot Singh, John Kelly, Erasmus Schneider, Erica Lasek-Nesselquist                                                                                                                    |
| EPI_ISL_861144, EPI_ISL_861147, EPI_ISL_861148, EPI_ISL_861150, EPI_ISL_861151, EPI_ISL_861152, EPI_ISL_861155, EPI_ISL_861156, EPI_ISL_861157, EPI_ISL_861159, EPI_ISL_861163, EPI_ISL_861164, EPI_ISL_861169, EPI_ISL_861170, EPI_ISL_861172                                                                                                                                                 |                                                                                                                     |                                                                                              |                                                                                                                                                                                                                                                                                                  |
| see above                                                                                                                                                                                                                                                                                                                                                                                      | KALEIDA CENTER FOR LABORATORY MEDICINE                                                                              | Wadsworth Center, New York State Department of Health                                        | Kirsten St. George, Daryl M. Lamson, Alexis Russel, Matthew Shudt, Melissa A Leisner, Jonathan Plitnick, Navjot Singh, John Kelly, Erasmus Schneider, Erica Lasek-Nesselquist                                                                                                                    |
| EPI_ISL_861233, EPI_ISL_861240, EPI_ISL_861241                                                                                                                                                                                                                                                                                                                                                 | Ohio Department of Health Laboratory                                                                                | Ohio Department of Health Laboratory                                                         | Holmes, Jennifer; Eric Brandt, Keoni Omura, Glen McGillivray, Caitlin McDonnell, Kirtana Ramadugu, Erica Leasure, Kelsey Florek, Heather Blankenship, Quanta Brown, and Tammy Bannerman                                                                                                          |
| EPI_ISL_861245, EPI_ISL_861248, EPI_ISL_861256, EPI_ISL_861257, EPI_ISL_861259, EPI_ISL_861263, EPI_ISL_861276, EPI_ISL_861277, EPI_ISL_861281, EPI_ISL_861285, EPI_ISL_861286, EPI_ISL_861291, EPI_ISL_861293, EPI_ISL_861296, EPI_ISL_861298, EPI_ISL_861301, EPI_ISL_861305, EPI_ISL_861307, EPI_ISL_861315, EPI_ISL_861321, EPI_ISL_861322, EPI_ISL_861323, EPI_ISL_861324, EPI_ISL_861330 |                                                                                                                     |                                                                                              |                                                                                                                                                                                                                                                                                                  |
| see above                                                                                                                                                                                                                                                                                                                                                                                      | MONTEFIORE MEDICAL CENTER LABORATORIES                                                                              | Wadsworth Center, New York State Department of Health                                        | Kirsten St. George, Daryl M. Lamson, Alexis Russel, Matthew Shudt, Melissa A Leisner, Jonathan Plitnick, Navjot Singh, John Kelly, Erasmus Schneider, Erica Lasek-Nesselquist                                                                                                                    |
| EPI_ISL_861433                                                                                                                                                                                                                                                                                                                                                                                 | Ohio State University                                                                                               | James Molecular Laboratory                                                                   | Huolin Tu, Matthew R Avenarius, Laura Kubatko, Matthew Hunt, Xiaokang Pan, Peng Ru, Jason Garee, Keele Thomas, Peter Mohler, Preeti Pancholi, Dan Jones                                                                                                                                          |
| EPI_ISL_861439, EPI_ISL_861441, EPI_ISL_861442                                                                                                                                                                                                                                                                                                                                                 | The Ohio State University                                                                                           | James Molecular Laboratory                                                                   | Huolin Tu, Matthew R Avenarius, Laura Kubatko, Matthew Hunt, Xiaokang Pan, Peng Ru, Jason Garee, Keele Thomas, Peter Mohler, Preeti Pancholi, Dan Jones                                                                                                                                          |
| EPI_ISL_861509, EPI_ISL_861510, EPI_ISL_861514, EPI_ISL_861517,                                                                                                                                                                                                                                                                                                                                | ZOTZ KLIMAS MVZ D sseldorf-Centrum G r  BAG f r Labormedizin, Genetik, Zytologie, Pathologie                        | Center of Medical Microbiology, Virology, and Hospital Hygiene, University of Duesseldorf    | Maximilian Damagnez, Alexander Dilthey, Ashley-Jane Duplessis, Patrick Finzer, Katrin Hoffmann, Torsten Houwaart, Lisanna H lse, Malte Kohns Vasconcelos, Marek Korencak, Nadine L bke, Jessica Nicolai, Klaus Pfeffer, Daniel Strelow, J rg Timm, Andreas Walker, Tobias Wienemann, Rainer Zotz |

|                                                                                                                                                                                |                                                                               |                                                                                                                                                                                                                                                                                                                                                                                                                                                                                     |                                                                                                                                                                                                                                                                                                                                                                                                                                                                                                                                                                         |
|--------------------------------------------------------------------------------------------------------------------------------------------------------------------------------|-------------------------------------------------------------------------------|-------------------------------------------------------------------------------------------------------------------------------------------------------------------------------------------------------------------------------------------------------------------------------------------------------------------------------------------------------------------------------------------------------------------------------------------------------------------------------------|-------------------------------------------------------------------------------------------------------------------------------------------------------------------------------------------------------------------------------------------------------------------------------------------------------------------------------------------------------------------------------------------------------------------------------------------------------------------------------------------------------------------------------------------------------------------------|
| EPI_ISL_861518, EPI_ISL_861519, EPI_ISL_861522, EPI_ISL_861523, EPI_ISL_861524                                                                                                 |                                                                               |                                                                                                                                                                                                                                                                                                                                                                                                                                                                                     |                                                                                                                                                                                                                                                                                                                                                                                                                                                                                                                                                                         |
| EPI_ISL_861537, EPI_ISL_861538, EPI_ISL_861552, EPI_ISL_861584, EPI_ISL_861585, EPI_ISL_861586, EPI_ISL_861587, EPI_ISL_861588, EPI_ISL_861589, EPI_ISL_861590, EPI_ISL_861591 |                                                                               |                                                                                                                                                                                                                                                                                                                                                                                                                                                                                     |                                                                                                                                                                                                                                                                                                                                                                                                                                                                                                                                                                         |
| see above                                                                                                                                                                      | Instituto Nacional de Saude (INSA)                                            | Instituto Nacional de Saude (INSA)                                                                                                                                                                                                                                                                                                                                                                                                                                                  | Borges et al                                                                                                                                                                                                                                                                                                                                                                                                                                                                                                                                                            |
| EPI_ISL_861674                                                                                                                                                                 | UPA Central de Caraguatatuba                                                  | Instituto Adolfo Lutz, Interdisciplinary Procedures Center, Strategic Laboratory                                                                                                                                                                                                                                                                                                                                                                                                    | Claudio Tavares Sacchi, Claudia Regina Gonçalves, Erica Valessa Ramos Gomes, Karoline Rodrigues Campos                                                                                                                                                                                                                                                                                                                                                                                                                                                                  |
| EPI_ISL_861676                                                                                                                                                                 | UPA Vila Santa Catarina                                                       | Instituto Adolfo Lutz, Interdisciplinary Procedures Center, Strategic Laboratory                                                                                                                                                                                                                                                                                                                                                                                                    | Claudio Tavares Sacchi, Claudia Regina Gonçalves, Erica Valessa Ramos Gomes, Karoline Rodrigues Campos                                                                                                                                                                                                                                                                                                                                                                                                                                                                  |
| EPI_ISL_861677                                                                                                                                                                 | Instituto Adolfo Lutz - Central                                               | Instituto Adolfo Lutz, Interdisciplinary Procedures Center, Strategic Laboratory                                                                                                                                                                                                                                                                                                                                                                                                    | Claudio Tavares Sacchi, Claudia Regina Gonçalves, Erica Valessa Ramos Gomes, Karoline Rodrigues Campos                                                                                                                                                                                                                                                                                                                                                                                                                                                                  |
| EPI_ISL_861678                                                                                                                                                                 | Laboratorio Municipal de Guarulhos                                            | Instituto Adolfo Lutz, Interdisciplinary Procedures Center, Strategic Laboratory                                                                                                                                                                                                                                                                                                                                                                                                    | Claudio Tavares Sacchi, Claudia Regina Gonçalves, Erica Valessa Ramos Gomes, Karoline Rodrigues Campos                                                                                                                                                                                                                                                                                                                                                                                                                                                                  |
| EPI_ISL_861679                                                                                                                                                                 | Instituto Adolfo Lutz - Regional de Taubate                                   | Instituto Adolfo Lutz, Interdisciplinary Procedures Center, Strategic Laboratory                                                                                                                                                                                                                                                                                                                                                                                                    | Claudio Tavares Sacchi, Claudia Regina Gonçalves, Erica Valessa Ramos Gomes, Karoline Rodrigues Campos                                                                                                                                                                                                                                                                                                                                                                                                                                                                  |
| EPI_ISL_861680                                                                                                                                                                 | Hospital e Pronto Socorro Portinari                                           | Instituto Adolfo Lutz, Interdisciplinary Procedures Center, Strategic Laboratory                                                                                                                                                                                                                                                                                                                                                                                                    | Claudio Tavares Sacchi, Claudia Regina Gonçalves, Erica Valessa Ramos Gomes, Karoline Rodrigues Campos                                                                                                                                                                                                                                                                                                                                                                                                                                                                  |
| EPI_ISL_861682                                                                                                                                                                 | UPA Vila Santa Catarina                                                       | Instituto Adolfo Lutz, Interdisciplinary Procedures Center, Strategic Laboratory                                                                                                                                                                                                                                                                                                                                                                                                    | Claudio Tavares Sacchi, Claudia Regina Gonçalves, Erica Valessa Ramos Gomes, Karoline Rodrigues Campos                                                                                                                                                                                                                                                                                                                                                                                                                                                                  |
| EPI_ISL_861699                                                                                                                                                                 | Los Angeles County PHL                                                        | Los Angeles County PHL                                                                                                                                                                                                                                                                                                                                                                                                                                                              | P. Hemarajata et al.                                                                                                                                                                                                                                                                                                                                                                                                                                                                                                                                                    |
| EPI_ISL_861857, EPI_ISL_861858, EPI_ISL_861859, EPI_ISL_861861, EPI_ISL_861863                                                                                                 | Labormedizinisches Zentrum Dr Risch                                           | University Hospital Basel, Clinical Bacteriology                                                                                                                                                                                                                                                                                                                                                                                                                                    | Tim Roloff, Madlen Stange, Helena MB Seth-Smith, Alfredo Mari, Karoline Leuzinger, Julia Bielicki, Nadia Wohlwend, Martin Risch, Lorenz Risch, Manuel Battegay, Hans Hirsch, Adrian Egli                                                                                                                                                                                                                                                                                                                                                                                |
| EPI_ISL_861865, EPI_ISL_861866                                                                                                                                                 | Bioanalytika AG                                                               | University Hospital Basel, Clinical Bacteriology                                                                                                                                                                                                                                                                                                                                                                                                                                    | Tim Roloff, Madlen Stange, Helena MB Seth-Smith, Alfredo Mari, Karoline Leuzinger, Julia Bielicki, Adrian Härrli, Manuel Battegay, Hans Hirsch, Adrian Egli                                                                                                                                                                                                                                                                                                                                                                                                             |
| EPI_ISL_861873                                                                                                                                                                 | LATE - Laboratório de Técnicas Especiais - Hospital Israelita Albert Einstein | LATE - Laboratório de Técnicas Especiais - Hospital Israelita Albert Einstein                                                                                                                                                                                                                                                                                                                                                                                                       | Deyvid Amgarten, Fernanda de Mello Malta, Raquel Riyuzo, Ana Paula Moreira Salles, Pedro Henrique Sebe Rodrigues, João Renato Rebello Pinho                                                                                                                                                                                                                                                                                                                                                                                                                             |
| EPI_ISL_861969, EPI_ISL_861972, EPI_ISL_861978, EPI_ISL_861996, EPI_ISL_862000, EPI_ISL_862003                                                                                 | OHSU Lab Services Molecular Microbiology Lab                                  | Oregon SARS-CoV-2 Genome Sequencing Center                                                                                                                                                                                                                                                                                                                                                                                                                                          | Brendan L. O'Connell, Sally Grindstaff, Kayla Carter, Ruth V. Nichols, Alec J. Hirsch, Donna Hansel, Guang Fan, Xuan Qin, Daniel N. Streblow, William B. Messer, Andrew C. Adey, Benjamin N. Bimber, Brian J. O'Roak                                                                                                                                                                                                                                                                                                                                                    |
| EPI_ISL_862039                                                                                                                                                                 | RSUP Dr. Sardjito                                                             | Genetics Working Group (Pokja Genetik) Faculty of Medicine, Public Health and Nursing Universitas Gadjah Mada (FK-KMK UGM); Disease Investigation Center Wates Ministry of Agriculture Indonesia; Department of Microbiology FK-KMK UGM; Laboratorium Diagnostik Yayasan Tahija World Mosquito Program (WMP) Yogyakarta Center for Tropical Medicine FK-KMK UGM; Integrated Research Center FK-KMK UGM; Department of Computer Science and Electronics FMIPA UGM; RSUP Dr. Sardjito | Gunadi, Hendra Wibawa, . Marcellus, Mohamad S. Hakim, Edwin W. Daniwijaya, Ludhang P. Rizki, Endah Supriyati, Eggi Arguni, Titik Nuryastuti, Tri Wibawa, Dwi AA Nugrahaningsih, Afiahayati, Siswanto, Kristy Iskandar, Nungki Anggorowati, Ika Trisnawati, Sumardi, Eko Budiono, Bambang Sigit Riyanto, Heni Retnowulan, Munawar Gani, Satria Maulana, Nur Rahmi Ananda, Riat El Khair, Yunika Puspawati, Osman Sianipar, Umi Solekha Intansari, Elizabeth Henny Herningtiyas, Ira Puspitawati, Nur Imma Fatimah Harahap, William Widitjjarso, Maria Patricia Inggriani |
| EPI_ISL_862040                                                                                                                                                                 | RSUP Dr. Sardjito                                                             | Genetics Working Group (Pokja Genetik) Faculty of Medicine, Public Health and Nursing Universitas Gadjah Mada (FK-KMK UGM); Disease Investigation Center Wates Ministry of Agriculture Indonesia; Department of Microbiology FK-KMK UGM; Laboratorium Diagnostik Yayasan Tahija World Mosquito Program (WMP) Yogyakarta Center for Tropical Medicine FK-KMK UGM; Integrated Research Center FK-KMK UGM; Department of Computer Science and Electronics FMIPA UGM; RSUP Dr. Sardjito | Gunadi, Hendra Wibawa, . Marcellus, Mohamad S. Hakim, Edwin W. Daniwijaya, Ludhang P. Rizki, Endah Supriyati, Eggi Arguni, Titik Nuryastuti, Tri Wibawa, Dwi AA Nugrahaningsih, Afiahayati, Siswanto, Kristy Iskandar, Nungki Anggorowati, Ika Trisnawati, Sumardi, Eko Budiono, Bambang Sigit Riyanto, Heni Retnowulan, Munawar Gani, Satria Maulana, Nur Rahmi Ananda, Riat El Khair, Yunika Puspawati, Osman Sianipar, Umi Solekha Intansari, Elizabeth Henny Herningtiyas, Ira Puspitawati, Nur Imma Fatimah Harahap, Alvin Santoso Kalim, Untung Riawan            |
| EPI_ISL_862041                                                                                                                                                                 | RSUP Dr. Sardjito                                                             | Genetics Working Group (Pokja Genetik) Faculty of Medicine, Public Health and Nursing Universitas Gadjah Mada (FK-KMK UGM); Disease Investigation Center Wates Ministry of Agriculture Indonesia; Department of Microbiology FK-KMK UGM; Laboratorium Diagnostik Yayasan Tahija World Mosquito Program (WMP) Yogyakarta Center for Tropical Medicine FK-KMK UGM; Integrated Research Center FK-KMK UGM; Department of Computer Science and Electronics FMIPA UGM; RSUP Dr. Sardjito | Gunadi, Hendra Wibawa, . Marcellus, Mohamad S. Hakim, Edwin W. Daniwijaya, Ludhang P. Rizki, Endah Supriyati, Eggi Arguni, Titik Nuryastuti, Tri Wibawa, Dwi AA Nugrahaningsih, Afiahayati, Siswanto, Kristy Iskandar, Nungki Anggorowati, Ika Trisnawati, Sumardi, Eko Budiono, Bambang Sigit Riyanto, Heni Retnowulan, Munawar Gani, Satria Maulana, Nur Rahmi Ananda, Riat El Khair, Yunika Puspawati, Osman Sianipar, Umi Solekha Intansari, Elizabeth Henny Herningtiyas, Ira Puspitawati, Nur Imma Fatimah Harahap, Dyah Ayu Puspitarani, Audric Kenny Tedja      |
| EPI_ISL_862145                                                                                                                                                                 | Charité Universitätsmedizin Berlin, Institut für Virologie/Labor Berlin       | Charité Universitätsmedizin Berlin, Institut für Virologie                                                                                                                                                                                                                                                                                                                                                                                                                          | Victor M Corman, Barbara Mühlemann, Jörn Beheim-Schwarzbach, Tobias Bleicker, Julia Tesch, Talitha Veith, Julia Schneider, Terry Jones, Christian Drosten                                                                                                                                                                                                                                                                                                                                                                                                               |
| EPI_ISL_862190, EPI_ISL_862251                                                                                                                                                 | Respiratory Virus Unit, National Infection Service, Public Health England     | COVID-19 Genomics UK (COG-UK) Consortium                                                                                                                                                                                                                                                                                                                                                                                                                                            | PHE Covid Sequencing Team                                                                                                                                                                                                                                                                                                                                                                                                                                                                                                                                               |
| EPI_ISL_862544                                                                                                                                                                 | Complejo Hospitalario Xeral-Calde                                             | Instituto de Salud Carlos III                                                                                                                                                                                                                                                                                                                                                                                                                                                       | Iglesias-Caballero, M. Camarero, S. Molinero Calamita, M. González-Esguevillas, M. Pozo, F. Casas, I. Jiménez, P. Jiménez, M. Zaballos, A. Monzón, S. Varona, S. Juliá, M. Cuesta, I. Alonso, P.                                                                                                                                                                                                                                                                                                                                                                        |
| EPI_ISL_862545                                                                                                                                                                 | Hospital Universitario Virgen de la Arrixaca                                  | Instituto de Salud Carlos III                                                                                                                                                                                                                                                                                                                                                                                                                                                       | Iglesias-Caballero, M. Camarero, S. Molinero Calamita, M. González-Esguevillas, M. Pozo, F. Casas, I. Jiménez, P. Jiménez, M. Zaballos, A. Monzón, S. Varona, S. Juliá, M. Cuesta, I. Moreno, A.                                                                                                                                                                                                                                                                                                                                                                        |
| EPI_ISL_862546, EPI_ISL_862547                                                                                                                                                 | Consejería de Sanidad y Asuntos Sociales                                      | Instituto de Salud Carlos III                                                                                                                                                                                                                                                                                                                                                                                                                                                       | Iglesias-Caballero, M. Camarero, S. Molinero Calamita, M. González-Esguevillas, M. Pozo, F. Casas, I. Jiménez, P. Jiménez, M. Zaballos, A. Monzón, S. Varona, S. Juliá, M. Cuesta, I. Gutiérrez, G.                                                                                                                                                                                                                                                                                                                                                                     |
| EPI_ISL_862548                                                                                                                                                                 | Hospital Clínico San Carlos                                                   | Instituto de Salud Carlos III                                                                                                                                                                                                                                                                                                                                                                                                                                                       | Iglesias-Caballero, M. Camarero, S. Molinero Calamita, M. González-Esguevillas, M. Pozo, F. Casas, I. Jiménez, P. Jiménez, M. Zaballos, A. Monzón, S. Varona, S. Juliá, M. Cuesta, I. Rodríguez, I.                                                                                                                                                                                                                                                                                                                                                                     |
| EPI_ISL_862549                                                                                                                                                                 | Hospital Universitario Virgen de la Arrixaca                                  | Instituto de Salud Carlos III                                                                                                                                                                                                                                                                                                                                                                                                                                                       | Iglesias-Caballero, M. Camarero, S. Molinero Calamita, M. González-Esguevillas, M. Pozo, F. Casas, I. Jiménez, P. Jiménez, M. Zaballos, A. Monzón, S. Varona, S. Juliá, M. Cuesta, I. Moreno, A.                                                                                                                                                                                                                                                                                                                                                                        |
| EPI_ISL_862550                                                                                                                                                                 | Complejo Hospitalario de Navarra                                              | Instituto de Salud Carlos III                                                                                                                                                                                                                                                                                                                                                                                                                                                       | Iglesias-Caballero, M. Camarero, S. Molinero Calamita, M. González-Esguevillas, M. Pozo, F. Casas, I. Jiménez, P. Jiménez, M. Zaballos, A. Monzón, S. Varona, S. Juliá, M. Cuesta, I. Ezpeleta, C.                                                                                                                                                                                                                                                                                                                                                                      |
| EPI_ISL_862551                                                                                                                                                                 | Hospital J.M. Morales Meseguer                                                | Instituto de Salud Carlos III                                                                                                                                                                                                                                                                                                                                                                                                                                                       | Iglesias-Caballero, M. Camarero, S. Molinero Calamita, M. González-Esguevillas, M. Pozo, F. Casas, I. Jiménez, P. Jiménez, M. Zaballos, A. Monzón, S. Varona, S. Juliá, M. Cuesta, I. Guerrero, C.                                                                                                                                                                                                                                                                                                                                                                      |

|                                                                                                                                                                                                                                                                                                                                                                                                                |                                                                                                           |                                                                                                                                                                      |                                                                                                                                                                                                                                                                                                                                                                                                                                     |
|----------------------------------------------------------------------------------------------------------------------------------------------------------------------------------------------------------------------------------------------------------------------------------------------------------------------------------------------------------------------------------------------------------------|-----------------------------------------------------------------------------------------------------------|----------------------------------------------------------------------------------------------------------------------------------------------------------------------|-------------------------------------------------------------------------------------------------------------------------------------------------------------------------------------------------------------------------------------------------------------------------------------------------------------------------------------------------------------------------------------------------------------------------------------|
| EPI_ISL_862552                                                                                                                                                                                                                                                                                                                                                                                                 | Complejo Hospitalario de Navarra                                                                          | Instituto de Salud Carlos III                                                                                                                                        | Iglesias-Caballero, M.Camarero, S. Molinero Calamita, M. González-Esguevillas, M. Pozo, F. Casas, I. Jiménez, P. Jiménez, M. Zaballos, A. Monzón, S. Varona, S. Juliá, M. Cuesta, I. Ezpeleta, C.                                                                                                                                                                                                                                   |
| EPI_ISL_862553, EPI_ISL_862554, EPI_ISL_862555                                                                                                                                                                                                                                                                                                                                                                 | Compejo Hospitalario Xeral-Calde                                                                          | Instituto de Salud Carlos III                                                                                                                                        | Iglesias-Caballero, M.Camarero, S. Molinero Calamita, M. González-Esguevillas, M. Pozo, F. Casas, I. Jiménez, P. Jiménez, M. Zaballos, A. Monzón, S. Varona, S. Juliá, M. Cuesta, I. Alonso, P.                                                                                                                                                                                                                                     |
| EPI_ISL_862556                                                                                                                                                                                                                                                                                                                                                                                                 | Gerencia de Asistencia Sanitaria de Soria                                                                 | Instituto de Salud Carlos III                                                                                                                                        | Iglesias-Caballero, M.Camarero, S. Molinero Calamita, M. González-Esguevillas, M. Pozo, F. Casas, I. Jiménez, P. Jiménez, M. Zaballos, A. Monzón, S. Varona, S. Juliá, M. Cuesta, I. Aldea, C.                                                                                                                                                                                                                                      |
| EPI_ISL_862557, EPI_ISL_862558, EPI_ISL_862559, EPI_ISL_862560, EPI_ISL_862561, EPI_ISL_862562, EPI_ISL_862563                                                                                                                                                                                                                                                                                                 | Consejería de Sanidad y Asuntos Sociales                                                                  | Instituto de Salud Carlos III                                                                                                                                        | Iglesias-Caballero, M. Camarero, S. Molinero Calamita, M. González-Esguevillas, M. Pozo, F. Casas, I. Jiménez, P. Jiménez, M. Zaballos, A. Monzón, S. Varona, S. Juliá, M. Cuesta, I. Gutiérrez, G.                                                                                                                                                                                                                                 |
| EPI_ISL_862564, EPI_ISL_862565                                                                                                                                                                                                                                                                                                                                                                                 | Gerencia de Asistencia Sanitaria de Soria                                                                 | Instituto de Salud Carlos III                                                                                                                                        | Iglesias-Caballero, M.Camarero, S. Molinero Calamita, M. González-Esguevillas, M. Pozo, F. Casas, I. Jiménez, P. Jiménez, M. Zaballos, A. Monzón, S. Varona, S. Juliá, M. Cuesta, I. Aldea, C.                                                                                                                                                                                                                                      |
| EPI_ISL_862566                                                                                                                                                                                                                                                                                                                                                                                                 | Consejería de Sanidad y Asuntos Sociales                                                                  | Instituto de Salud Carlos III                                                                                                                                        | Iglesias-Caballero, M. Camarero, S. Molinero Calamita, M. González-Esguevillas, M. Pozo, F. Casas, I. Jiménez, P. Jiménez, M. Zaballos, A. Monzón, S. Varona, S. Juliá, M. Cuesta, I. Gutiérrez, G.                                                                                                                                                                                                                                 |
| EPI_ISL_862568                                                                                                                                                                                                                                                                                                                                                                                                 | Hospital Universitario Virgen de la Arrixaca                                                              | Instituto de Salud Carlos III                                                                                                                                        | Iglesias-Caballero, M. Camarero, S. Molinero Calamita, M. González-Esguevillas, M. Pozo, F. Casas, I. Jiménez, P. Jiménez, M. Zaballos, A. Monzón, S. Varona, S. Juliá, M. Cuesta, I. Moreno, A.                                                                                                                                                                                                                                    |
| EPI_ISL_862569                                                                                                                                                                                                                                                                                                                                                                                                 | Hospital Clínico San Carlos                                                                               | Instituto de Salud Carlos III                                                                                                                                        | Iglesias-Caballero, M. Camarero, S. Molinero Calamita, M. González-Esguevillas, M. Pozo, F. Casas, I. Jiménez, P. Jiménez, M. Zaballos, A. Monzón, S. Varona, S. Juliá, M. Cuesta, I. Rodríguez, I.                                                                                                                                                                                                                                 |
| EPI_ISL_862570, EPI_ISL_862571, EPI_ISL_862572                                                                                                                                                                                                                                                                                                                                                                 | Complejo Hospitalario de Navarra                                                                          | Instituto de Salud Carlos III                                                                                                                                        | Iglesias-Caballero, M.Camarero, S. Molinero Calamita, M. González-Esguevillas, M. Pozo, F. Casas, I. Jiménez, P. Jiménez, M. Zaballos, A. Monzón, S. Varona, S. Juliá, M. Cuesta, I. Ezpeleta, C.                                                                                                                                                                                                                                   |
| EPI_ISL_862573, EPI_ISL_862574, EPI_ISL_862575, EPI_ISL_862576, EPI_ISL_862577, EPI_ISL_862578, EPI_ISL_862579, EPI_ISL_862580, EPI_ISL_862581, EPI_ISL_862582, EPI_ISL_862583, EPI_ISL_862584, EPI_ISL_862585, EPI_ISL_862586, EPI_ISL_862587, EPI_ISL_862588                                                                                                                                                 | see above                                                                                                 | see above                                                                                                                                                            | see above                                                                                                                                                                                                                                                                                                                                                                                                                           |
| EPI_ISL_862749, EPI_ISL_862766, EPI_ISL_862769                                                                                                                                                                                                                                                                                                                                                                 | Utah Public Health Laboratory, Utah Public Health Laboratory Infectious Disease submission group          | Utah Public Health Laboratory, Utah Public Health Laboratory Infectious Disease submission group                                                                     | Young,E.L., Oakeson,K.F., Gallagher,T.                                                                                                                                                                                                                                                                                                                                                                                              |
| EPI_ISL_862832                                                                                                                                                                                                                                                                                                                                                                                                 | National Institute of Infectious Diseases-Prof. Dr. Matei Bals Molecular Diagnostics Laboratory           | National Institute of Infectious Diseases-Prof. Dr. Matei Bals Molecular Diagnostics Laboratory                                                                      | Leontina Banica, Marius Surleac, Corina Casangiu, Petre Milu, Andreea Tudor, Simona Paraschiv, Dan Otelea                                                                                                                                                                                                                                                                                                                           |
| EPI_ISL_863532, EPI_ISL_863600, EPI_ISL_863631, EPI_ISL_863635, EPI_ISL_863639, EPI_ISL_863645, EPI_ISL_863651, EPI_ISL_863707, EPI_ISL_863746, EPI_ISL_863803, EPI_ISL_863830, EPI_ISL_863841                                                                                                                                                                                                                 | see above                                                                                                 | see above                                                                                                                                                            | see above                                                                                                                                                                                                                                                                                                                                                                                                                           |
| EPI_ISL_864547, EPI_ISL_864548, EPI_ISL_864549, EPI_ISL_864551, EPI_ISL_864552, EPI_ISL_864553, EPI_ISL_864555, EPI_ISL_864556, EPI_ISL_864557, EPI_ISL_864558, EPI_ISL_864559, EPI_ISL_864560, EPI_ISL_864561, EPI_ISL_864562                                                                                                                                                                                 | see above                                                                                                 | see above                                                                                                                                                            | see above                                                                                                                                                                                                                                                                                                                                                                                                                           |
| EPI_ISL_864580                                                                                                                                                                                                                                                                                                                                                                                                 | National Institute of Public Health - National Institute of Hygiene                                       | National Institute of Public Health - National Institute of Hygiene, DNA Sequencing and Synthesis Facility (oligo.pl) - Institute of Biochemistry and Biophysics PAS | Wokowicz Tomasz, Zacharczuk Katarzyna, Gawor Jan                                                                                                                                                                                                                                                                                                                                                                                    |
| EPI_ISL_864739, EPI_ISL_864744, EPI_ISL_864802, EPI_ISL_864837, EPI_ISL_864839, EPI_ISL_864854, EPI_ISL_864869, EPI_ISL_864871, EPI_ISL_864873, EPI_ISL_864882, EPI_ISL_864890                                                                                                                                                                                                                                 | see above                                                                                                 | see above                                                                                                                                                            | see above                                                                                                                                                                                                                                                                                                                                                                                                                           |
| EPI_ISL_864960, EPI_ISL_864962, EPI_ISL_864965, EPI_ISL_864966, EPI_ISL_864969, EPI_ISL_864973, EPI_ISL_864977, EPI_ISL_864983                                                                                                                                                                                                                                                                                 | West of Scotland Specialist Virology Centre, NHSGGC / MRC-University of Glasgow Centre for Virus Research | COVID-19 Genomics UK (COG-UK) Consortium                                                                                                                             | Ana da Silva Filipe, Natasha Johnson, Kathy Smollett, Daniel Mair, Stephen Carmichael, Alice Broos, Lily Tong, Jenna Nichols, Kyriaki Nomikou; Sarah McDonald; Richard Orton, Joseph Hughes, Sreenu Vattipally, David L Robertson; Alasdair MacLean, Rory Gunson; Sharif Shaaban, Matthew Holden; Rachel Blacow, Guy Mollett, Kathy Li, James Shepherd, Antonia Ho, Emma Thomson                                                    |
| EPI_ISL_865002                                                                                                                                                                                                                                                                                                                                                                                                 | Lighthouse Lab in Glasgow / MRC-University of Glasgow Centre for Virus Research                           | COVID-19 Genomics UK (COG-UK) Consortium                                                                                                                             | Ana da Silva Filipe, Natasha Johnson, Kathy Smollett, Daniel Mair, Stephen Carmichael, Alice Broos, Lily Tong, Jenna Nichols, Kyriaki Nomikou; Sarah McDonald; Harper VanSteenhouse, Yumi Kasai, David Gray, Carol Clugston, Anna Dominiczak; Alasdair MacLean, Rory Gunson; Richard Orton, Joseph Hughes, Sreenu Vattipally, David L Robertson; Sharif Shaaban, Matthew Holden; Kathy Li, James Shepherd, Antonia Ho, Emma Thomson |
| EPI_ISL_865069, EPI_ISL_865070, EPI_ISL_865071, EPI_ISL_865072, EPI_ISL_865080, EPI_ISL_865083, EPI_ISL_865084, EPI_ISL_865085, EPI_ISL_865086, EPI_ISL_865087, EPI_ISL_865088, EPI_ISL_865142, EPI_ISL_865146, EPI_ISL_865147, EPI_ISL_865148, EPI_ISL_865161                                                                                                                                                 | see above                                                                                                 | see above                                                                                                                                                            | see above                                                                                                                                                                                                                                                                                                                                                                                                                           |
| EPI_ISL_865215, EPI_ISL_865216, EPI_ISL_865219, EPI_ISL_865220, EPI_ISL_865221, EPI_ISL_865242, EPI_ISL_865248, EPI_ISL_865250, EPI_ISL_865252, EPI_ISL_865256, EPI_ISL_865257, EPI_ISL_865259, EPI_ISL_865263, EPI_ISL_865264, EPI_ISL_865265, EPI_ISL_865267, EPI_ISL_865379, EPI_ISL_865395, EPI_ISL_865398, EPI_ISL_865401, EPI_ISL_865418, EPI_ISL_865431, EPI_ISL_865437                                 | see above                                                                                                 | see above                                                                                                                                                            | see above                                                                                                                                                                                                                                                                                                                                                                                                                           |
| EPI_ISL_865489, EPI_ISL_865495, EPI_ISL_865501, EPI_ISL_865503, EPI_ISL_865517, EPI_ISL_865524, EPI_ISL_865548, EPI_ISL_865560, EPI_ISL_865562, EPI_ISL_865578                                                                                                                                                                                                                                                 | Barts Health NHS Trust                                                                                    | COVID-19 Genomics UK (COG-UK) Consortium                                                                                                                             | CUTINO-MOGUEL, Maria-Teresa; HARRINGTON, David; OWOYEMI, Dola; KULASEGARAN-SHYLINI, Raghavendran; BROAD, Claire; KELE, Beatrix                                                                                                                                                                                                                                                                                                      |
| EPI_ISL_866049, EPI_ISL_866050, EPI_ISL_866058, EPI_ISL_866059, EPI_ISL_866061, EPI_ISL_866063, EPI_ISL_866064, EPI_ISL_866066, EPI_ISL_866067, EPI_ISL_866068, EPI_ISL_866069, EPI_ISL_866072, EPI_ISL_866074, EPI_ISL_866106, EPI_ISL_866119, EPI_ISL_866121, EPI_ISL_866123, EPI_ISL_866133, EPI_ISL_866136, EPI_ISL_866139, EPI_ISL_866140, EPI_ISL_866148, EPI_ISL_866151, EPI_ISL_866168, EPI_ISL_866179 | see above                                                                                                 | see above                                                                                                                                                            | see above                                                                                                                                                                                                                                                                                                                                                                                                                           |
| EPI_ISL_866349, EPI_ISL_866350, EPI_ISL_866352, EPI_ISL_866365, EPI_ISL_866372                                                                                                                                                                                                                                                                                                                                 | Regional Virus Laboratory, Belfast Health and Social Care Trust                                           | COVID-19 Genomics UK (COG-UK) Consortium                                                                                                                             | Conall McCaughey, James McKenna, Tanya Curran, Susan Feeney, Alison Watt, Ciara Cox, Mairead Connor, Zoltan Molnar, David Simpson, Derek Fairley                                                                                                                                                                                                                                                                                    |
| EPI_ISL_866400, EPI_ISL_866402, EPI_ISL_866404, EPI_ISL_866407, EPI_ISL_866409, EPI_ISL_866411, EPI_ISL_866412, EPI_ISL_866413, EPI_ISL_866416, EPI_ISL_866420, EPI_ISL_866430, EPI_ISL_866434, EPI_ISL_866445, EPI_ISL_866446, EPI_ISL_866449, EPI_ISL_866452, EPI_ISL_866454, EPI_ISL_866473, EPI_ISL_866483, EPI_ISL_866496                                                                                 | see above                                                                                                 | see above                                                                                                                                                            | see above                                                                                                                                                                                                                                                                                                                                                                                                                           |
|                                                                                                                                                                                                                                                                                                                                                                                                                | Northumbria University / South Tees Hospitals NHS                                                         | COVID-19 Genomics UK (COG-UK) Consortium                                                                                                                             | Darren L Smith,Andrew Nelson,Matthew Bashton,Greg R Young,Joshua Loh,John Allan,Mohammad A Tariq,Giles S Holt,Gary Black,Wen C Yew,Lynn                                                                                                                                                                                                                                                                                             |



|                                                                                                                                                                                                                                                                                                                                                                                                                                                                                                                                                                                                                                                                                                                                                                                                                                                                                                                                                                                                                                                                                                                                                                |                                                                                                                                                                                                                                                                                      |                                                                                                                                                                                                                                                                                                                                                                                                                                                                                     |                                                                                                                                                                                                                                                                                                                                                                                                                                                                                                                                                                  |
|----------------------------------------------------------------------------------------------------------------------------------------------------------------------------------------------------------------------------------------------------------------------------------------------------------------------------------------------------------------------------------------------------------------------------------------------------------------------------------------------------------------------------------------------------------------------------------------------------------------------------------------------------------------------------------------------------------------------------------------------------------------------------------------------------------------------------------------------------------------------------------------------------------------------------------------------------------------------------------------------------------------------------------------------------------------------------------------------------------------------------------------------------------------|--------------------------------------------------------------------------------------------------------------------------------------------------------------------------------------------------------------------------------------------------------------------------------------|-------------------------------------------------------------------------------------------------------------------------------------------------------------------------------------------------------------------------------------------------------------------------------------------------------------------------------------------------------------------------------------------------------------------------------------------------------------------------------------|------------------------------------------------------------------------------------------------------------------------------------------------------------------------------------------------------------------------------------------------------------------------------------------------------------------------------------------------------------------------------------------------------------------------------------------------------------------------------------------------------------------------------------------------------------------|
| EPI_ISL_872060                                                                                                                                                                                                                                                                                                                                                                                                                                                                                                                                                                                                                                                                                                                                                                                                                                                                                                                                                                                                                                                                                                                                                 | Department of Clinical Microbiology                                                                                                                                                                                                                                                  | GIGA Medical Genomics                                                                                                                                                                                                                                                                                                                                                                                                                                                               | Keith Durkin, Maria Artesi, Sébastien Bontems, Raphaël Boreux, Bouchra Boujemla, Cécile Meex, Pierrette Melin, Marie-Pierre Hayette, Vincent Bours                                                                                                                                                                                                                                                                                                                                                                                                               |
| EPI_ISL_872188                                                                                                                                                                                                                                                                                                                                                                                                                                                                                                                                                                                                                                                                                                                                                                                                                                                                                                                                                                                                                                                                                                                                                 | RSUP Dr. Sardjito                                                                                                                                                                                                                                                                    | Genetics Working Group (Pokja Genetik) Faculty of Medicine, Public Health and Nursing Universitas Gadjah Mada (FK-KMK UGM); Disease Investigation Center Wates Ministry of Agriculture Indonesia; Department of Microbiology FK-KMK UGM; Laboratorium Diagnostik Yayasan Tahija World Mosquito Program (WMP) Yogyakarta Center for Tropical Medicine FK-KMK UGM; Integrated Research Center FK-KMK UGM; Department of Computer Science and Electronics FMIPA UGM; RSUP Dr. Sardjito | Gunadi, Hendra Wibawa, . Marcellus, Mohamad S. Hakim, Edwin W. Daniwijaya, Ludhang P. Rizki, Endah Supriyati, Eggi Arguni, Titik Nuryastuti, Tri Wibawa, Dwi AA Nugrahaningsih, Afiahayati, Siswanto, Kristy Iskandar, Nungki Anggorowati, Ika Trisnawati, Sumardi, Eko Budiono, Bambang Sigit Riyanto, Heni Retnowulan, Munawar Gani, Satria Maulana, Nur Rahmi Ananda, Riat El Khair, Yunika Puspawadi, Osman Sianipar, Umi Solekhah Intansari, Elizabeth Henny Herringtiyas, Ira Puspitawati, Nur Imma Fatimah Harahap, Aditya Rifqi Fauzi, Fadil Fahri       |
| EPI_ISL_872189                                                                                                                                                                                                                                                                                                                                                                                                                                                                                                                                                                                                                                                                                                                                                                                                                                                                                                                                                                                                                                                                                                                                                 | RSUP Dr. Sardjito                                                                                                                                                                                                                                                                    | Genetics Working Group (Pokja Genetik) Faculty of Medicine, Public Health and Nursing Universitas Gadjah Mada (FK-KMK UGM); Disease Investigation Center Wates Ministry of Agriculture Indonesia; Department of Microbiology FK-KMK UGM; Laboratorium Diagnostik Yayasan Tahija World Mosquito Program (WMP) Yogyakarta Center for Tropical Medicine FK-KMK UGM; Integrated Research Center FK-KMK UGM; Department of Computer Science and Electronics FMIPA UGM; RSUP Dr. Sardjito | Gunadi, Hendra Wibawa, . Marcellus, Mohamad S. Hakim, Edwin W. Daniwijaya, Ludhang P. Rizki, Endah Supriyati, Eggi Arguni, Titik Nuryastuti, Tri Wibawa, Dwi AA Nugrahaningsih, Afiahayati, Siswanto, Kristy Iskandar, Nungki Anggorowati, Ika Trisnawati, Sumardi, Eko Budiono, Bambang Sigit Riyanto, Heni Retnowulan, Munawar Gani, Satria Maulana, Nur Rahmi Ananda, Riat El Khair, Yunika Puspawadi, Osman Sianipar, Umi Solekhah Intansari, Elizabeth Henny Herringtiyas, Ira Puspitawati, Nur Imma Fatimah Harahap, Alvin S. Kalim, Dwiki afandy          |
| EPI_ISL_872190                                                                                                                                                                                                                                                                                                                                                                                                                                                                                                                                                                                                                                                                                                                                                                                                                                                                                                                                                                                                                                                                                                                                                 | RSUP Dr. Sardjito                                                                                                                                                                                                                                                                    | Genetics Working Group (Pokja Genetik) Faculty of Medicine, Public Health and Nursing Universitas Gadjah Mada (FK-KMK UGM); Disease Investigation Center Wates Ministry of Agriculture Indonesia; Department of Microbiology FK-KMK UGM; Laboratorium Diagnostik Yayasan Tahija World Mosquito Program (WMP) Yogyakarta Center for Tropical Medicine FK-KMK UGM; Integrated Research Center FK-KMK UGM; Department of Computer Science and Electronics FMIPA UGM; RSUP Dr. Sardjito | Gunadi, Hendra Wibawa, . Marcellus, Mohamad S. Hakim, Edwin W. Daniwijaya, Ludhang P. Rizki, Endah Supriyati, Eggi Arguni, Titik Nuryastuti, Tri Wibawa, Dwi AA Nugrahaningsih, Afiahayati, Siswanto, Kristy Iskandar, Nungki Anggorowati, Ika Trisnawati, Sumardi, Eko Budiono, Bambang Sigit Riyanto, Heni Retnowulan, Munawar Gani, Satria Maulana, Nur Rahmi Ananda, Riat El Khair, Yunika Puspawadi, Osman Sianipar, Umi Solekhah Intansari, Elizabeth Henny Herringtiyas, Ira Puspitawati, Nur Imma Fatimah Harahap, Dyah Ayu Puspitarani, Kemala Athollah |
| EPI_ISL_872203, EPI_ISL_872209, EPI_ISL_872259                                                                                                                                                                                                                                                                                                                                                                                                                                                                                                                                                                                                                                                                                                                                                                                                                                                                                                                                                                                                                                                                                                                 | Labo Analyses Med                                                                                                                                                                                                                                                                    | National Reference Center for Viruses of Respiratory Infections, Institut Pasteur, Paris                                                                                                                                                                                                                                                                                                                                                                                            | Marion Barbet, Sylvie Behillil, Méline Bizard, Angela Brisebarre, Camille Capel, Etienne Simon-Lorière, Vincent Enouf, Maud Vanpeene, Sylvie van der Werf                                                                                                                                                                                                                                                                                                                                                                                                        |
| EPI_ISL_872313                                                                                                                                                                                                                                                                                                                                                                                                                                                                                                                                                                                                                                                                                                                                                                                                                                                                                                                                                                                                                                                                                                                                                 | Labo analyses med                                                                                                                                                                                                                                                                    | National Reference Center for Viruses of Respiratory Infections, Institut Pasteur, Paris                                                                                                                                                                                                                                                                                                                                                                                            | Marion Barbet, Sylvie Behillil, Méline Bizard, Angela Brisebarre, Camille Capel, Etienne Simon-Lorière, Vincent Enouf, Maud Vanpeene, Sylvie van der Werf,Amzalag Jonas                                                                                                                                                                                                                                                                                                                                                                                          |
| EPI_ISL_872323                                                                                                                                                                                                                                                                                                                                                                                                                                                                                                                                                                                                                                                                                                                                                                                                                                                                                                                                                                                                                                                                                                                                                 | Labo Analyses Med                                                                                                                                                                                                                                                                    | National Reference Center for Viruses of Respiratory Infections, Institut Pasteur, Paris                                                                                                                                                                                                                                                                                                                                                                                            | Marion Barbet, Sylvie Behillil, Méline Bizard, Angela Brisebarre, Camille Capel, Etienne Simon-Lorière, Vincent Enouf, Maud Vanpeene, Sylvie van der Werf,Rouah Raquel                                                                                                                                                                                                                                                                                                                                                                                           |
| EPI_ISL_872591, EPI_ISL_872592, EPI_ISL_872593, EPI_ISL_872594, EPI_ISL_872595, EPI_ISL_872596, EPI_ISL_872598, EPI_ISL_872599                                                                                                                                                                                                                                                                                                                                                                                                                                                                                                                                                                                                                                                                                                                                                                                                                                                                                                                                                                                                                                 | Department of Laboratory Medicine, National Taiwan University Hospital                                                                                                                                                                                                               | Microbial Genomics Core Lab, National Taiwan University Centers of Genomic and Precision Medicine                                                                                                                                                                                                                                                                                                                                                                                   | Shiou-Hwei Yeh, You-Yu Lin, Ya-Yun Lai, Chiao-Ling Li, Shan-Chwen Chang, Pei-Jer Chen, Sui-Yuan Chang                                                                                                                                                                                                                                                                                                                                                                                                                                                            |
| EPI_ISL_872614, EPI_ISL_872615, EPI_ISL_872616, EPI_ISL_872623                                                                                                                                                                                                                                                                                                                                                                                                                                                                                                                                                                                                                                                                                                                                                                                                                                                                                                                                                                                                                                                                                                 | Nigeria Centre for Disease Control (NCDC)                                                                                                                                                                                                                                            | African Centre of Excellence for Genomics of Infectious Diseases (ACEGID), Redeemer's University                                                                                                                                                                                                                                                                                                                                                                                    | Oluniyi P.E. et al                                                                                                                                                                                                                                                                                                                                                                                                                                                                                                                                               |
| EPI_ISL_872652, EPI_ISL_872668, EPI_ISL_872669                                                                                                                                                                                                                                                                                                                                                                                                                                                                                                                                                                                                                                                                                                                                                                                                                                                                                                                                                                                                                                                                                                                 | University of Massachusetts Medical School                                                                                                                                                                                                                                           | Infectious Disease Program, Broad Institute of Harvard and MIT                                                                                                                                                                                                                                                                                                                                                                                                                      | Lemieux,J.E., Siddle,K.J., Ward,D., Ellison,R., Adams,G., Gladden-Young,A., Lagerborg,K., Rudy,M., DeRuff,K., Carter,A., Normandin,E., Bauer,M., Reilly,S., Tomkins-Tinch,C., Loreth,C., Chaluvasi,S., Birren,B.W., Gallagher,G., Smole,S., Park,D.J., MacInnis,B.L., and Sabeti,P.C.                                                                                                                                                                                                                                                                            |
| EPI_ISL_872723, EPI_ISL_872730, EPI_ISL_872733, EPI_ISL_872736, EPI_ISL_872741                                                                                                                                                                                                                                                                                                                                                                                                                                                                                                                                                                                                                                                                                                                                                                                                                                                                                                                                                                                                                                                                                 | Rhode Island Department of Health                                                                                                                                                                                                                                                    | Infectious Disease Program, Broad Institute of Harvard and MIT                                                                                                                                                                                                                                                                                                                                                                                                                      | Lemieux,J.E., Siddle,K.J., Huard,R., King,E., Azevedo,K., Miller,A., Adams,G., Gladden-Young,A., Lagerborg,K., Rudy,M., DeRuff,K., Carter,A., Normandin,E., Bauer,M., Reilly,S., Tomkins-Tinch,C., Loreth,C., Chaluvasi,S., Birren,B.W., Gallagher,G., Smole,S., Park,D.J., MacInnis,B.L., and Sabeti,P.C.                                                                                                                                                                                                                                                       |
| EPI_ISL_872905, EPI_ISL_872914, EPI_ISL_872916, EPI_ISL_872917, EPI_ISL_872918, EPI_ISL_872919, EPI_ISL_872925, EPI_ISL_872931, EPI_ISL_872934, EPI_ISL_872935, EPI_ISL_872936, EPI_ISL_872937, EPI_ISL_872941, EPI_ISL_872944, EPI_ISL_872945, EPI_ISL_872946, EPI_ISL_872947, EPI_ISL_872950, EPI_ISL_872952, EPI_ISL_872953, EPI_ISL_872954, EPI_ISL_872955, EPI_ISL_872958, EPI_ISL_872961, EPI_ISL_872965, EPI_ISL_872967, EPI_ISL_872968, EPI_ISL_872970, EPI_ISL_872971                                                                                                                                                                                                                                                                                                                                                                                                                                                                                                                                                                                                                                                                                 | WHO National Influenza Centre Russian Federation                                                                                                                                                                                                                                     | WHO National Influenza Centre Russian Federation                                                                                                                                                                                                                                                                                                                                                                                                                                    | Andrey Komissarov, Artem Fadeev, Anna Ivanova, Kseniya Komissarova, Dmitry Bazhenov, Mikhail Bakaev, Daria Danilenko, Ksenia Safina, Elena Nabieva, Georgii Bazykin, Dmitry Lioznov                                                                                                                                                                                                                                                                                                                                                                              |
| EPI_ISL_872986, EPI_ISL_872987, EPI_ISL_872988, EPI_ISL_872992, EPI_ISL_872994, EPI_ISL_872996, EPI_ISL_873003, EPI_ISL_873006, EPI_ISL_873012, EPI_ISL_873014, EPI_ISL_873017, EPI_ISL_873020, EPI_ISL_873024, EPI_ISL_873026                                                                                                                                                                                                                                                                                                                                                                                                                                                                                                                                                                                                                                                                                                                                                                                                                                                                                                                                 | HELIX LLC                                                                                                                                                                                                                                                                            | WHO National Influenza Centre Russian Federation                                                                                                                                                                                                                                                                                                                                                                                                                                    | Andrey Komissarov, Artem Fadeev, Anna Ivanova, Kseniya Komissarova, Dmitry Bazhenov, Mikhail Bakaev, Daria Danilenko, Ksenia Safina, Elena Nabieva, Georgii Bazykin, Dmitry Lioznov                                                                                                                                                                                                                                                                                                                                                                              |
| EPI_ISL_873124, EPI_ISL_873125                                                                                                                                                                                                                                                                                                                                                                                                                                                                                                                                                                                                                                                                                                                                                                                                                                                                                                                                                                                                                                                                                                                                 | University of Michigan Clinical Microbiology Laboratory                                                                                                                                                                                                                              | Lauring Lab, University of Michigan, Department of Microbiology and Immunology                                                                                                                                                                                                                                                                                                                                                                                                      | Valesano                                                                                                                                                                                                                                                                                                                                                                                                                                                                                                                                                         |
| EPI_ISL_873211, EPI_ISL_873212, EPI_ISL_873214, EPI_ISL_873216, EPI_ISL_873217, EPI_ISL_873219, EPI_ISL_873220, EPI_ISL_873221, EPI_ISL_873222, EPI_ISL_873223, EPI_ISL_873224, EPI_ISL_873225, EPI_ISL_873226, EPI_ISL_873227, EPI_ISL_873228, EPI_ISL_873230, EPI_ISL_873231, EPI_ISL_873232, EPI_ISL_873233, EPI_ISL_873234                                                                                                                                                                                                                                                                                                                                                                                                                                                                                                                                                                                                                                                                                                                                                                                                                                 | M Health Fairview                                                                                                                                                                                                                                                                    | Minnesota Department of Health, Public Health Laboratory                                                                                                                                                                                                                                                                                                                                                                                                                            | Alexandra Lorentz, Jacob Garfin, Matt Plumb, and Xiong Wang                                                                                                                                                                                                                                                                                                                                                                                                                                                                                                      |
| EPI_ISL_875347, EPI_ISL_875348                                                                                                                                                                                                                                                                                                                                                                                                                                                                                                                                                                                                                                                                                                                                                                                                                                                                                                                                                                                                                                                                                                                                 | Ohio Department of Health Laboratory                                                                                                                                                                                                                                                 | Ohio Department of Health Laboratory                                                                                                                                                                                                                                                                                                                                                                                                                                                | Holmes, Jennifer; Eric Brandt, Keoni Omura, Glen McGillivray, Caitlin McDonnell, Kirtana Ramadugu, Erica Leasure, Kelsey Florek, Heather Blankenship, Quanta Brown, and Tammy Bannerman                                                                                                                                                                                                                                                                                                                                                                          |
| EPI_ISL_875551                                                                                                                                                                                                                                                                                                                                                                                                                                                                                                                                                                                                                                                                                                                                                                                                                                                                                                                                                                                                                                                                                                                                                 | ULSS 1 Dolomiti                                                                                                                                                                                                                                                                      | Istituto Zooprofilattico Sperimentale delle Venezie                                                                                                                                                                                                                                                                                                                                                                                                                                 | Adelaide Milani, Alessia Schivo, Annalisa Salviato, Erika Giorgia Quaranta, Ambra Pastori, Bianca Zecchin, Alice Fusaro, Isabella Monne, Calogero Terregino, Antonia Ricci                                                                                                                                                                                                                                                                                                                                                                                       |
| EPI_ISL_875555, EPI_ISL_875556                                                                                                                                                                                                                                                                                                                                                                                                                                                                                                                                                                                                                                                                                                                                                                                                                                                                                                                                                                                                                                                                                                                                 | ULSS 2 Treviso                                                                                                                                                                                                                                                                       | Istituto Zooprofilattico Sperimentale delle Venezie                                                                                                                                                                                                                                                                                                                                                                                                                                 | Adelaide Milani, Alessia Schivo, Annalisa Salviato, Erika Giorgia Quaranta, Ambra Pastori, Bianca Zecchin, Alice Fusaro, Isabella Monne, Calogero Terregino, Antonia Ricci                                                                                                                                                                                                                                                                                                                                                                                       |
| EPI_ISL_875687                                                                                                                                                                                                                                                                                                                                                                                                                                                                                                                                                                                                                                                                                                                                                                                                                                                                                                                                                                                                                                                                                                                                                 | Department of Infectious Diseases, Istituto Superiore di Sanità, Rome, Italy; UCO Igiene e Sanità Pubblica, ASUGI, Trieste, Italy; Laboratorio di Genomica ed Epigenomica sistema Argo, Area SciencePark, Trieste, Italy; Laboratorio di Virologia Molecolare, ICGEB, Trieste, Italy | Istituto Superiore di Sanità (ISS)                                                                                                                                                                                                                                                                                                                                                                                                                                                  | Paola Stefanelli, Angela Di Martino, Alessandra Lo Presti, Stefano Fiore, Pierlanfranco D'Agaro, Ludovica Segat, Danilo Licastro, Alessandro Marcello, Manuela Marra, Maria Carollo, Marco Crescenzi                                                                                                                                                                                                                                                                                                                                                             |
| EPI_ISL_875959, EPI_ISL_875960, EPI_ISL_875961, EPI_ISL_875963, EPI_ISL_875964, EPI_ISL_875965, EPI_ISL_875966, EPI_ISL_875967, EPI_ISL_875968, EPI_ISL_875969, EPI_ISL_875970, EPI_ISL_875971, EPI_ISL_875972, EPI_ISL_875973, EPI_ISL_875974, EPI_ISL_875976, EPI_ISL_875977, EPI_ISL_875978, EPI_ISL_875979, EPI_ISL_875980, EPI_ISL_875981, EPI_ISL_875982, EPI_ISL_875983, EPI_ISL_875984, EPI_ISL_875985, EPI_ISL_875986, EPI_ISL_875987, EPI_ISL_875988, EPI_ISL_875989, EPI_ISL_875990, EPI_ISL_875991, EPI_ISL_875992, EPI_ISL_875993, EPI_ISL_875995, EPI_ISL_875996, EPI_ISL_875997, EPI_ISL_875998, EPI_ISL_875999, EPI_ISL_876000, EPI_ISL_876001, EPI_ISL_876002, EPI_ISL_876003, EPI_ISL_876004, EPI_ISL_876005, EPI_ISL_876006, EPI_ISL_876007, EPI_ISL_876008, EPI_ISL_876009, EPI_ISL_876010, EPI_ISL_876011, EPI_ISL_876012, EPI_ISL_876013, EPI_ISL_876014, EPI_ISL_876015, EPI_ISL_876016, EPI_ISL_876017, EPI_ISL_876018, EPI_ISL_876019, EPI_ISL_876020, EPI_ISL_876021, EPI_ISL_876022, EPI_ISL_876023, EPI_ISL_876024, EPI_ISL_876025, EPI_ISL_876026, EPI_ISL_876027, EPI_ISL_876028, EPI_ISL_876029, EPI_ISL_876030, EPI_ISL_876031 | Research & Development Laboratory                                                                                                                                                                                                                                                    | Maciej Sykulski, Grzegorz Nowicki, Monika Makowska-Woniak, Jakub Grabowski, Natalia Drwska-Matelska, ukasz Krych, Micha Kaszuba                                                                                                                                                                                                                                                                                                                                                     |                                                                                                                                                                                                                                                                                                                                                                                                                                                                                                                                                                  |
| EPI_ISL_876044                                                                                                                                                                                                                                                                                                                                                                                                                                                                                                                                                                                                                                                                                                                                                                                                                                                                                                                                                                                                                                                                                                                                                 | M Health Fairview                                                                                                                                                                                                                                                                    | Minnesota Department of Health, Public Health Laboratory                                                                                                                                                                                                                                                                                                                                                                                                                            | Alexandra Lorentz, Jacob Garfin, Matt Plumb, and Xiong Wang                                                                                                                                                                                                                                                                                                                                                                                                                                                                                                      |
| EPI_ISL_876252, EPI_ISL_876262,                                                                                                                                                                                                                                                                                                                                                                                                                                                                                                                                                                                                                                                                                                                                                                                                                                                                                                                                                                                                                                                                                                                                | Massachusetts State Public Health Laboratory                                                                                                                                                                                                                                         | Massachusetts State Public Health Laboratory                                                                                                                                                                                                                                                                                                                                                                                                                                        | Andrew Lang, Timelia Fink, Glen Gallagher, Sandra Smole                                                                                                                                                                                                                                                                                                                                                                                                                                                                                                          |

|                                                                                                                                                                                                                                                                                                                                                                                                                                                                                                                                                                                                                                                                                                                                                                                                                                                                                                                                                                                                                |                                                                                                                                |                                                                                                                                |                                                                                                                                                                                                                                                                                                   |
|----------------------------------------------------------------------------------------------------------------------------------------------------------------------------------------------------------------------------------------------------------------------------------------------------------------------------------------------------------------------------------------------------------------------------------------------------------------------------------------------------------------------------------------------------------------------------------------------------------------------------------------------------------------------------------------------------------------------------------------------------------------------------------------------------------------------------------------------------------------------------------------------------------------------------------------------------------------------------------------------------------------|--------------------------------------------------------------------------------------------------------------------------------|--------------------------------------------------------------------------------------------------------------------------------|---------------------------------------------------------------------------------------------------------------------------------------------------------------------------------------------------------------------------------------------------------------------------------------------------|
| EPI_ISL_876284, EPI_ISL_876292, EPI_ISL_876303, EPI_ISL_876308, EPI_ISL_876316, EPI_ISL_876317                                                                                                                                                                                                                                                                                                                                                                                                                                                                                                                                                                                                                                                                                                                                                                                                                                                                                                                 |                                                                                                                                |                                                                                                                                |                                                                                                                                                                                                                                                                                                   |
| EPI_ISL_876533, EPI_ISL_876534, EPI_ISL_876537, EPI_ISL_876538, EPI_ISL_876541, EPI_ISL_876542, EPI_ISL_876543, EPI_ISL_876544, EPI_ISL_876545, EPI_ISL_876546, EPI_ISL_876547, EPI_ISL_876548, EPI_ISL_876549, EPI_ISL_876550, EPI_ISL_876551                                                                                                                                                                                                                                                                                                                                                                                                                                                                                                                                                                                                                                                                                                                                                                 |                                                                                                                                |                                                                                                                                |                                                                                                                                                                                                                                                                                                   |
| see above                                                                                                                                                                                                                                                                                                                                                                                                                                                                                                                                                                                                                                                                                                                                                                                                                                                                                                                                                                                                      | Florida Bureau of Public Health Laboratories                                                                                   | Florida Bureau of Public Health Laboratories                                                                                   | Sarah Schmedes, Jason Blanton                                                                                                                                                                                                                                                                     |
| EPI_ISL_876590, EPI_ISL_876592                                                                                                                                                                                                                                                                                                                                                                                                                                                                                                                                                                                                                                                                                                                                                                                                                                                                                                                                                                                 | TN Division of Laboratory Services                                                                                             | Pathogen Discovery, Respiratory Viruses Branch, Division of Viral Diseases, Centers for Disease Control and Prevention         | Ying Tao, Yan Li, Jing Zhang, Krista Queen, Anna Uehara, Peter Cook, Clinton R. Paden, Haibin Wang, Suxiang Tong                                                                                                                                                                                  |
| EPI_ISL_876740                                                                                                                                                                                                                                                                                                                                                                                                                                                                                                                                                                                                                                                                                                                                                                                                                                                                                                                                                                                                 | Istituto Zooprofilattico Sperimentale della Puglia e della Basilicata                                                          | Istituto Zooprofilattico Sperimentale della Puglia e della Basilicata                                                          | Parisi A., Bianco A., Capozzi L., Del Sambio L., Manzulli V, Rondinone V., Pace L., Cipolletta D., Galante D.                                                                                                                                                                                     |
| EPI_ISL_876743                                                                                                                                                                                                                                                                                                                                                                                                                                                                                                                                                                                                                                                                                                                                                                                                                                                                                                                                                                                                 | Presidio di Brindisi Di Summa - Perrino                                                                                        | Istituto Zooprofilattico Sperimentale della Puglia e della Basilicata                                                          | Parisi A., Bianco A., Capozzi L., Del Sambio L., Manzulli V, Rondinone V., Pace L., Cipolletta D., Galante D.                                                                                                                                                                                     |
| EPI_ISL_876744, EPI_ISL_876745, EPI_ISL_876746, EPI_ISL_876747, EPI_ISL_876749, EPI_ISL_876750, EPI_ISL_876751, EPI_ISL_876752, EPI_ISL_876753, EPI_ISL_876755, EPI_ISL_876756, EPI_ISL_876757, EPI_ISL_876758, EPI_ISL_876759, EPI_ISL_876760, EPI_ISL_876761, EPI_ISL_876762, EPI_ISL_876763, EPI_ISL_876764, EPI_ISL_876765, EPI_ISL_876766, EPI_ISL_876767, EPI_ISL_876768, EPI_ISL_876769, EPI_ISL_876770, EPI_ISL_876771, EPI_ISL_876772, EPI_ISL_876773, EPI_ISL_876774, EPI_ISL_876775, EPI_ISL_876776, EPI_ISL_876777, EPI_ISL_876778, EPI_ISL_876779, EPI_ISL_876780, EPI_ISL_876781, EPI_ISL_876782, EPI_ISL_876783, EPI_ISL_876785, EPI_ISL_876786, EPI_ISL_876787, EPI_ISL_876788, EPI_ISL_876789, EPI_ISL_876790, EPI_ISL_876791, EPI_ISL_876792, EPI_ISL_876793, EPI_ISL_876794, EPI_ISL_876795, EPI_ISL_876796, EPI_ISL_876797, EPI_ISL_876798, EPI_ISL_876800, EPI_ISL_876801, EPI_ISL_876802, EPI_ISL_876803, EPI_ISL_876804, EPI_ISL_876805, EPI_ISL_876806, EPI_ISL_876808, EPI_ISL_876809 |                                                                                                                                |                                                                                                                                |                                                                                                                                                                                                                                                                                                   |
| see above                                                                                                                                                                                                                                                                                                                                                                                                                                                                                                                                                                                                                                                                                                                                                                                                                                                                                                                                                                                                      | Istituto Zooprofilattico Sperimentale della Puglia e della Basilicata                                                          | Istituto Zooprofilattico Sperimentale della Puglia e della Basilicata                                                          | Parisi A., Bianco A., Capozzi L., Del Sambio L., Manzulli V, Rondinone V., Pace L., Cipolletta D., Galante D.                                                                                                                                                                                     |
| EPI_ISL_877186                                                                                                                                                                                                                                                                                                                                                                                                                                                                                                                                                                                                                                                                                                                                                                                                                                                                                                                                                                                                 | Quest Diagnostics                                                                                                              | Quest Diagnostics                                                                                                              | Rosenthal,S.H., Gerasimova,A., Kagan,R.M., Anderson, B., Hua, M., Liu Y., Bernstein, L.E., Livingston, K.E., Perez, A., Shalhout, D.F., Shlyakhter, I.A., Owen, R., Tanpaiboon, P., Lacbawan, F.                                                                                                  |
| EPI_ISL_877228                                                                                                                                                                                                                                                                                                                                                                                                                                                                                                                                                                                                                                                                                                                                                                                                                                                                                                                                                                                                 | Institute for Medical Research, Infectious Disease Research Centre, National Institutes of Health, Ministry of Health Malaysia | Institute for Medical Research, Infectious Disease Research Centre, National Institutes of Health, Ministry of Health Malaysia | Suppiah J, Kamel K, Azizan MA, Thayan R                                                                                                                                                                                                                                                           |
| EPI_ISL_877419                                                                                                                                                                                                                                                                                                                                                                                                                                                                                                                                                                                                                                                                                                                                                                                                                                                                                                                                                                                                 | Siti Khodijah Hospital                                                                                                         | Institute of Tropical Disease, Universitas Airlangga                                                                           | Krisnoadi Rahardjo, Aldise M Nastri, Jezzy R Dewantari, Rima R Prasetya, Muhammad Hamdan, Gatot Soegiarto, Laksmi Wulandari, Resti Yudhawati, Yasuko Mori, Soetjipto, Kazufumi Shimizu, Maria I Lusida                                                                                            |
| EPI_ISL_877420                                                                                                                                                                                                                                                                                                                                                                                                                                                                                                                                                                                                                                                                                                                                                                                                                                                                                                                                                                                                 | Darus Syifa' Islamic Hospital                                                                                                  | Institute of Tropical Disease, Universitas Airlangga                                                                           | Aldise M Nastri, Jezzy R Dewantari, Rima R Prasetya, Krisnoadi Rahardjo, HM Faiz, Gatot Soegiarto, Laksmi Wulandari, Resti Yudhawati, Soetjipto, Yasuko Mori, Maria I Lusida, Kazufumi Shimizu                                                                                                    |
| EPI_ISL_877421                                                                                                                                                                                                                                                                                                                                                                                                                                                                                                                                                                                                                                                                                                                                                                                                                                                                                                                                                                                                 | Institute of Tropical Disease                                                                                                  | Institute of Tropical Disease, Universitas Airlangga                                                                           | Jezzy R Dewantari, Rima R Prasetya, Krisnoadi Rahardjo, Laksmi Wulandari, Resti Yudhawati, Soetjipto, Yasuko Mori, Maria I Lusida, Kazufumi Shimizu                                                                                                                                               |
| EPI_ISL_877422                                                                                                                                                                                                                                                                                                                                                                                                                                                                                                                                                                                                                                                                                                                                                                                                                                                                                                                                                                                                 | Citra Medika Hospital                                                                                                          | Institute of Tropical Disease, Universitas Airlangga                                                                           | Rima R Prasetya, Krisnoadi Rahardjo, Aldise M Nastri, Jezzy R Dewantari, Wahidah Rachmaniyah, Gatot Soegiarto, Laksmi Wulandari, Resti Yudhawati, Soetjipto, Yasuko Mori, Maria I Lusida, Kazufumi Shimizu                                                                                        |
| EPI_ISL_877423                                                                                                                                                                                                                                                                                                                                                                                                                                                                                                                                                                                                                                                                                                                                                                                                                                                                                                                                                                                                 | Primasatya Husada Citra Hospital                                                                                               | Institute of Tropical Disease, Universitas Airlangga                                                                           | Maria I Lusida, Krisnoadi Rahardjo, Aldise M Nastri, Jezzy R Dewantari, Rima R Prasetya, Pudji Djanuartono, Gatot Soegiarto, Laksmi Wulandari, Resti Yudhawati, Soetjipto, Yasuko Mori, Kazufumi Shimizu                                                                                          |
| EPI_ISL_877438, EPI_ISL_877439, EPI_ISL_877441, EPI_ISL_877442, EPI_ISL_877444, EPI_ISL_877445, EPI_ISL_877447, EPI_ISL_877448, EPI_ISL_877452                                                                                                                                                                                                                                                                                                                                                                                                                                                                                                                                                                                                                                                                                                                                                                                                                                                                 | Institute of Microbiology and Immunology, Faculty of Medicine, University of Ljubljana                                         | Institute of Microbiology and Immunology, Faculty of Medicine, University of Ljubljana                                         | Samo Zakotnik, Tomaž Mark Zorec, Matic Brvar, Miša Korva, Mario Poljak, Tatjana Avši - Županc                                                                                                                                                                                                     |
| EPI_ISL_877456                                                                                                                                                                                                                                                                                                                                                                                                                                                                                                                                                                                                                                                                                                                                                                                                                                                                                                                                                                                                 | Primasatya Husada Citra Hospital                                                                                               | Institute of Tropical Disease, Universitas Airlangga                                                                           | Krisnoadi Rahardjo, Aldise M Nastri, Jezzy R Dewantari, Rima R Prasetya, Pudji Djanuartono, Gatot Soegiarto, Laksmi Wulandari, Resti Yudhawati, Soetjipto, Yasuko Mori, Maria I Lusida, Kazufumi Shimizu                                                                                          |
| EPI_ISL_877457                                                                                                                                                                                                                                                                                                                                                                                                                                                                                                                                                                                                                                                                                                                                                                                                                                                                                                                                                                                                 | Primasatya Husada Citra Hospital                                                                                               | Institute of Tropical Disease, Universitas Airlangga                                                                           | Aldise M Nastri, Jezzy R Dewantari, Rima R Prasetya, Krisnoadi Rahardjo, Pudji Djanuartono, Gatot Soegiarto, Laksmi Wulandari, Resti Yudhawati, Soetjipto, Yasuko Mori, Maria I Lusida, Kazufumi Shimizu                                                                                          |
| EPI_ISL_877458                                                                                                                                                                                                                                                                                                                                                                                                                                                                                                                                                                                                                                                                                                                                                                                                                                                                                                                                                                                                 | Anwar Medika General Hospital                                                                                                  | Institute of Tropical Disease, Universitas Airlangga                                                                           | Jezzy R Dewantari, Rima R Prasetya, Krisnoadi Rahardjo, Aldise M Nastri, Nungky Taniasari, Gatot Soegiarto, Laksmi Wulandari, Resti Yudhawati, Soetjipto, Yasuko Mori, Maria I Lusida, Kazufumi Shimizu                                                                                           |
| EPI_ISL_877459                                                                                                                                                                                                                                                                                                                                                                                                                                                                                                                                                                                                                                                                                                                                                                                                                                                                                                                                                                                                 | Darmo Hospital                                                                                                                 | Institute of Tropical Disease, Universitas Airlangga                                                                           | Rima R Prasetya, Krisnoadi Rahardjo, Aldise M Nastri, Jezzy R Dewantari, Sulung Budianto, Gatot Soegiarto, Laksmi Wulandari, Resti Yudhawati, Soetjipto, Yasuko Mori, Maria I Lusida, Kazufumi Shimizu                                                                                            |
| EPI_ISL_877460                                                                                                                                                                                                                                                                                                                                                                                                                                                                                                                                                                                                                                                                                                                                                                                                                                                                                                                                                                                                 | Siti Khodijah Hospital                                                                                                         | Institute of Tropical Disease, Universitas Airlangga                                                                           | Maria I Lusida, Krisnoadi Rahardjo, Aldise M Nastri, Jezzy R Dewantari, Rima R Prasetya, Muhammad Hamdan, Gatot Soegiarto, Laksmi Wulandari, Resti Yudhawati, Soetjipto, Yasuko Mori, Kazufumi Shimizu                                                                                            |
| EPI_ISL_877538                                                                                                                                                                                                                                                                                                                                                                                                                                                                                                                                                                                                                                                                                                                                                                                                                                                                                                                                                                                                 | Siti Khodijah Hospital                                                                                                         | Institute of Tropical Disease, Universitas Airlangga                                                                           | Krisnoadi Rahardjo, Aldise M Nastri, Jezzy R Dewantari, Rima R Prasetya, Muhammad Hamdan, Gatot Soegiarto, Laksmi Wulandari, Resti Yudhawati, Soetjipto, Yasuko Mori, Maria I Lusida, Kazufumi Shimizu                                                                                            |
| EPI_ISL_878180, EPI_ISL_878191, EPI_ISL_878202, EPI_ISL_878226, EPI_ISL_878239, EPI_ISL_878266, EPI_ISL_878271, EPI_ISL_878384, EPI_ISL_878389                                                                                                                                                                                                                                                                                                                                                                                                                                                                                                                                                                                                                                                                                                                                                                                                                                                                 | San Diego County Public Health Laboratory                                                                                      | Andersen lab at Scripps Research                                                                                               | SEARCH Alliance San Diego with Tracy Basler, Jovan Shephard, Brett Austin                                                                                                                                                                                                                         |
| EPI_ISL_878571                                                                                                                                                                                                                                                                                                                                                                                                                                                                                                                                                                                                                                                                                                                                                                                                                                                                                                                                                                                                 | Biolab Diagnostic Laboratories                                                                                                 | Andersen lab at Scripps Research                                                                                               | Issa Abu-Dayyeh, Ahmad Tibi, Lama Hussein, Lina Mohammad, Zein Naber, Amid Abdelnour with SEARCH Alliance San Diego                                                                                                                                                                               |
| EPI_ISL_878587, EPI_ISL_878597                                                                                                                                                                                                                                                                                                                                                                                                                                                                                                                                                                                                                                                                                                                                                                                                                                                                                                                                                                                 | San Diego County Public Health Laboratory                                                                                      | Andersen lab at Scripps Research                                                                                               | SEARCH Alliance San Diego with Tracy Basler, Jovan Shephard, Brett Austin                                                                                                                                                                                                                         |
| EPI_ISL_878658, EPI_ISL_878674, EPI_ISL_878697, EPI_ISL_878700, EPI_ISL_878707, EPI_ISL_878721, EPI_ISL_878724, EPI_ISL_878732, EPI_ISL_878734, EPI_ISL_878736, EPI_ISL_878739, EPI_ISL_878742, EPI_ISL_878747, EPI_ISL_878750, EPI_ISL_878752, EPI_ISL_878755, EPI_ISL_878757, EPI_ISL_878760, EPI_ISL_878763, EPI_ISL_878765, EPI_ISL_878771, EPI_ISL_878773, EPI_ISL_878776, EPI_ISL_878779, EPI_ISL_878781, EPI_ISL_878789, EPI_ISL_878797                                                                                                                                                                                                                                                                                                                                                                                                                                                                                                                                                                 |                                                                                                                                |                                                                                                                                |                                                                                                                                                                                                                                                                                                   |
| see above                                                                                                                                                                                                                                                                                                                                                                                                                                                                                                                                                                                                                                                                                                                                                                                                                                                                                                                                                                                                      | Rady's Childrens Hospital                                                                                                      | Andersen lab at Scripps Research                                                                                               | SEARCH Alliance San Diego with Nanda Radamchar, David Dimmock, Linda Luo, Christina Clarke, Kathryn Bouic, Teresa Mueller, Denise Mallick                                                                                                                                                         |
| EPI_ISL_879929, EPI_ISL_879939, EPI_ISL_879945, EPI_ISL_880006, EPI_ISL_880024                                                                                                                                                                                                                                                                                                                                                                                                                                                                                                                                                                                                                                                                                                                                                                                                                                                                                                                                 | San Diego County Public Health Laboratory                                                                                      | Andersen lab at Scripps Research                                                                                               | SEARCH Alliance San Diego with Tracy Basler, Jovan Shephard, Brett Austin                                                                                                                                                                                                                         |
| EPI_ISL_880171, EPI_ISL_880172, EPI_ISL_880173, EPI_ISL_880174, EPI_ISL_880175, EPI_ISL_880180, EPI_ISL_880181, EPI_ISL_880184, EPI_ISL_880185, EPI_ISL_880187, EPI_ISL_880188, EPI_ISL_880189, EPI_ISL_880190, EPI_ISL_880193, EPI_ISL_880194, EPI_ISL_880195                                                                                                                                                                                                                                                                                                                                                                                                                                                                                                                                                                                                                                                                                                                                                 |                                                                                                                                |                                                                                                                                |                                                                                                                                                                                                                                                                                                   |
| see above                                                                                                                                                                                                                                                                                                                                                                                                                                                                                                                                                                                                                                                                                                                                                                                                                                                                                                                                                                                                      | Rady's Childrens Hospital                                                                                                      | Andersen lab at Scripps Research                                                                                               | SEARCH Alliance San Diego with Nanda Radamchar, David Dimmock, Linda Luo, Christina Clarke, Kathryn Bouic, Teresa Mueller, Denise Mallick                                                                                                                                                         |
| EPI_ISL_882303, EPI_ISL_882305, EPI_ISL_882307, EPI_ISL_882314, EPI_ISL_882316, EPI_ISL_882320, EPI_ISL_882323, EPI_ISL_882327, EPI_ISL_882332, EPI_ISL_882333, EPI_ISL_882343, EPI_ISL_882361, EPI_ISL_882363, EPI_ISL_882364, EPI_ISL_882372, EPI_ISL_882375, EPI_ISL_882388, EPI_ISL_882390, EPI_ISL_882393, EPI_ISL_882397, EPI_ISL_882398, EPI_ISL_882404, EPI_ISL_882409, EPI_ISL_882413, EPI_ISL_882415, EPI_ISL_882420, EPI_ISL_882421, EPI_ISL_882427, EPI_ISL_882437, EPI_ISL_882438, EPI_ISL_882442, EPI_ISL_882452, EPI_ISL_882473, EPI_ISL_882475, EPI_ISL_882476, EPI_ISL_882480, EPI_ISL_882491, EPI_ISL_882506, EPI_ISL_882512, EPI_ISL_882520, EPI_ISL_882525, EPI_ISL_882538, EPI_ISL_882539, EPI_ISL_882542, EPI_ISL_882548, EPI_ISL_882550, EPI_ISL_882559, EPI_ISL_882562, EPI_ISL_882571, EPI_ISL_882580, EPI_ISL_882586, EPI_ISL_882595                                                                                                                                                 |                                                                                                                                |                                                                                                                                |                                                                                                                                                                                                                                                                                                   |
| see above                                                                                                                                                                                                                                                                                                                                                                                                                                                                                                                                                                                                                                                                                                                                                                                                                                                                                                                                                                                                      | Lighthouse Lab in Alderley Park                                                                                                | Wellcome Sanger Institute for the COVID-19 Genomics UK (COG-UK) Consortium                                                     | Jacquelyn Wynn, Mairead Hyland, The Lighthouse Lab in Alderley Park and Alex Alderton, Roberto Amato, Sonia Goncalves, Ewan Harrison, David K. Jackson, Ian Johnston, Dominic Kwiatkowski, Cordelia Langford, John Sillitoe on behalf of the Wellcome Sanger Institute COVID-19 Surveillance Team |
| EPI_ISL_882617, EPI_ISL_882621, EPI_ISL_882623                                                                                                                                                                                                                                                                                                                                                                                                                                                                                                                                                                                                                                                                                                                                                                                                                                                                                                                                                                 | Hospital Ramón y Cajal                                                                                                         | Hospital Ramón y Cajal                                                                                                         | José M Gonzalez-Alba, Concepción Rodríguez, Melanie Abreu, Laura Martínez, Val F Lanza, Luz Leticia Olavarrieta, Rafael Cantón, JC Galán                                                                                                                                                          |



|                                                                                                                                                                                                                                                                                                                                                                                                                                                                                                                                                                                                                                                                                                                                                                                                                                                                                                                                                                                                                                                                                                                                                                                                                                                                                                                                                                                                                                                                                                                                                                                                                                                                                                                                                                                                                                                                                                                                                                                                                                                                                                                                                                                                                                                                                                                                                                                                                                                                                                |                                                                                                                                                                                                                                                                                                                                                                                                                                                                                              |                                                                                                                                                                        |                                                                                                                                                                                                                                                                                                                                                                                                                                                                                                                                                                                                                                                                                                                                                                                        |
|------------------------------------------------------------------------------------------------------------------------------------------------------------------------------------------------------------------------------------------------------------------------------------------------------------------------------------------------------------------------------------------------------------------------------------------------------------------------------------------------------------------------------------------------------------------------------------------------------------------------------------------------------------------------------------------------------------------------------------------------------------------------------------------------------------------------------------------------------------------------------------------------------------------------------------------------------------------------------------------------------------------------------------------------------------------------------------------------------------------------------------------------------------------------------------------------------------------------------------------------------------------------------------------------------------------------------------------------------------------------------------------------------------------------------------------------------------------------------------------------------------------------------------------------------------------------------------------------------------------------------------------------------------------------------------------------------------------------------------------------------------------------------------------------------------------------------------------------------------------------------------------------------------------------------------------------------------------------------------------------------------------------------------------------------------------------------------------------------------------------------------------------------------------------------------------------------------------------------------------------------------------------------------------------------------------------------------------------------------------------------------------------------------------------------------------------------------------------------------------------|----------------------------------------------------------------------------------------------------------------------------------------------------------------------------------------------------------------------------------------------------------------------------------------------------------------------------------------------------------------------------------------------------------------------------------------------------------------------------------------------|------------------------------------------------------------------------------------------------------------------------------------------------------------------------|----------------------------------------------------------------------------------------------------------------------------------------------------------------------------------------------------------------------------------------------------------------------------------------------------------------------------------------------------------------------------------------------------------------------------------------------------------------------------------------------------------------------------------------------------------------------------------------------------------------------------------------------------------------------------------------------------------------------------------------------------------------------------------------|
| EPI_ISL_882648, EPI_ISL_882649                                                                                                                                                                                                                                                                                                                                                                                                                                                                                                                                                                                                                                                                                                                                                                                                                                                                                                                                                                                                                                                                                                                                                                                                                                                                                                                                                                                                                                                                                                                                                                                                                                                                                                                                                                                                                                                                                                                                                                                                                                                                                                                                                                                                                                                                                                                                                                                                                                                                 | Swiss National Reference Centre for Influenza Virology laboratory, CNRI                                                                                                                                                                                                                                                                                                                                                                                                                      | Swiss National Reference Centre for Influenza Virology laboratory, CNRI                                                                                                | Tim Roloff, Ana Rita Gonçalves, Madlen Stange, Helena MB Seth-Smith, Alfredo Mari, Karoline Leuzinger, Julia Bielicki, Manuel Battagay, Hans Hirsch, Laurent Kaiser, Adrian Egli                                                                                                                                                                                                                                                                                                                                                                                                                                                                                                                                                                                                       |
| EPI_ISL_882661, EPI_ISL_882662                                                                                                                                                                                                                                                                                                                                                                                                                                                                                                                                                                                                                                                                                                                                                                                                                                                                                                                                                                                                                                                                                                                                                                                                                                                                                                                                                                                                                                                                                                                                                                                                                                                                                                                                                                                                                                                                                                                                                                                                                                                                                                                                                                                                                                                                                                                                                                                                                                                                 | Hospital de Santa Barbara de Goias                                                                                                                                                                                                                                                                                                                                                                                                                                                           | Instituto Adolfo Lutz, Interdisciplinary Procedures Center, Strategic Laboratory                                                                                       | Claudio Tavares Sacchi, Claudia Regina Gonçalves, Erica Valessa Ramos Gomes, Karoline Rodrigues Campos                                                                                                                                                                                                                                                                                                                                                                                                                                                                                                                                                                                                                                                                                 |
| EPI_ISL_882663, EPI_ISL_882664                                                                                                                                                                                                                                                                                                                                                                                                                                                                                                                                                                                                                                                                                                                                                                                                                                                                                                                                                                                                                                                                                                                                                                                                                                                                                                                                                                                                                                                                                                                                                                                                                                                                                                                                                                                                                                                                                                                                                                                                                                                                                                                                                                                                                                                                                                                                                                                                                                                                 | LACEN do Distrito Federal                                                                                                                                                                                                                                                                                                                                                                                                                                                                    | Instituto Adolfo Lutz, Interdisciplinary Procedures Center, Strategic Laboratory                                                                                       | Claudio Tavares Sacchi, Claudia Regina Gonçalves, Erica Valessa Ramos Gomes, Karoline Rodrigues Campos                                                                                                                                                                                                                                                                                                                                                                                                                                                                                                                                                                                                                                                                                 |
| EPI_ISL_882763, EPI_ISL_882765, EPI_ISL_882766, EPI_ISL_882767                                                                                                                                                                                                                                                                                                                                                                                                                                                                                                                                                                                                                                                                                                                                                                                                                                                                                                                                                                                                                                                                                                                                                                                                                                                                                                                                                                                                                                                                                                                                                                                                                                                                                                                                                                                                                                                                                                                                                                                                                                                                                                                                                                                                                                                                                                                                                                                                                                 | 1.AO Universitaria 'S. Giovanni di Dio e Ruggi D'Aragona, Scuola Medica Salernitana' Hospital / 2.UOC di Virologia e Microbiologia, Università della Campania 'L. Vanvitelli' / 3.AO Universitaria 'Federico II' Napoli Hospital / 4.AORN 'San Giuseppe Moscati' Avellino Hospital / 5.AO 'San Pio - presidio G. Rummo' Benevento Hospital / 6.AO 'Sant'Anna e San Sebastiano' Caserta Hospital / 7.PO 'Maria Santissima Addolorata' Eboli Hospital / 8.BiGom Istituto di Ricerche Genetiche | 1. Genome Research Center for Health (CRGS) / 2. Laboratory of Molecular Medicine and Genomics(LMMGe) / 3. Center for Research in Pure and Applied Mathematics (CRMPA) | Giorgio Giurato, Francesca Rizzo, Alessandro Weisz, Gianluigi Franci, Giovanni Nassa, Pasquale Pagliano, Roberta Tarallo, Elena Alexandrova, Ylenia D'Agostino, Carlo Ferravante, Jessica Lamberti, Viola Melone, Domenico Memoli, Valeria Mirici Cappa, Domenico Palumbo, Giovanni Pecoraro, Assunta Sellitto, Oriana Strianese, Ilaria Terenzi, Giuseppe Fenza, Aniello Gentile, Antonello Saccomanno, Sonia Amabile, Teresa Rocco, Annamaria Salvati, Emilia Vaccaro, Massimiliano Galdiero, Michele Cennamo, Giuseppe Portella, Maria Grazia Foti, Mariarosaria Ingino, Maria Landi, Maurizio Fumi, Vincenzo Rocco, Rita Greco, Vittoria Letizia, Arnolfo Petruzzello, Maddalena Schioppa, Gregorio Goffredi, Francesca Marciano, Michele Caraglia, Alessia Cossu, Marianna Scrima |
| EPI_ISL_882769                                                                                                                                                                                                                                                                                                                                                                                                                                                                                                                                                                                                                                                                                                                                                                                                                                                                                                                                                                                                                                                                                                                                                                                                                                                                                                                                                                                                                                                                                                                                                                                                                                                                                                                                                                                                                                                                                                                                                                                                                                                                                                                                                                                                                                                                                                                                                                                                                                                                                 | Institute of Tropical Disease                                                                                                                                                                                                                                                                                                                                                                                                                                                                | Institute of Tropical Disease, Universitas Airlangga                                                                                                                   | Kazufumi Shimizu, Krisnoadi Rahardjo, Aldise M Nastri, Jezy R Dewantari, Rima R Prasetya, Gatot Soegiarto, Laksmi Wulandari, Resti Yudhawati, Yasuko Mori, Soetjipto, Maria I Lusida                                                                                                                                                                                                                                                                                                                                                                                                                                                                                                                                                                                                   |
| EPI_ISL_882770                                                                                                                                                                                                                                                                                                                                                                                                                                                                                                                                                                                                                                                                                                                                                                                                                                                                                                                                                                                                                                                                                                                                                                                                                                                                                                                                                                                                                                                                                                                                                                                                                                                                                                                                                                                                                                                                                                                                                                                                                                                                                                                                                                                                                                                                                                                                                                                                                                                                                 | Darus Syifa' Islamic Hospital                                                                                                                                                                                                                                                                                                                                                                                                                                                                | Institute of Tropical Disease, Universitas Airlangga                                                                                                                   | Aldise M Nastri, Jezy R Dewantari, Rima R Prasetya, Krisnoadi Rahardjo, HM Faiz, Gatot Soegiarto, Laksmi Wulandari, Resti Yudhawati, Soetjipto, Yasuko Mori, Kazufumi Shimizu, Maria I Lusida                                                                                                                                                                                                                                                                                                                                                                                                                                                                                                                                                                                          |
| EPI_ISL_882771                                                                                                                                                                                                                                                                                                                                                                                                                                                                                                                                                                                                                                                                                                                                                                                                                                                                                                                                                                                                                                                                                                                                                                                                                                                                                                                                                                                                                                                                                                                                                                                                                                                                                                                                                                                                                                                                                                                                                                                                                                                                                                                                                                                                                                                                                                                                                                                                                                                                                 | Siti Khodijah Hospital                                                                                                                                                                                                                                                                                                                                                                                                                                                                       | Institute of Tropical Disease, Universitas Airlangga                                                                                                                   | Kazufumi Shimizu, Krisnoadi Rahardjo, Aldise M Nastri, Jezy R Dewantari, Rima R Prasetya, Muhammad Hamdan, Gatot Soegiarto, Laksmi Wulandari, Resti Yudhawati, Yasuko Mori, Soetjipto, Maria I Lusida                                                                                                                                                                                                                                                                                                                                                                                                                                                                                                                                                                                  |
| EPI_ISL_882921                                                                                                                                                                                                                                                                                                                                                                                                                                                                                                                                                                                                                                                                                                                                                                                                                                                                                                                                                                                                                                                                                                                                                                                                                                                                                                                                                                                                                                                                                                                                                                                                                                                                                                                                                                                                                                                                                                                                                                                                                                                                                                                                                                                                                                                                                                                                                                                                                                                                                 | Genomic Medicine Laboratory, IRCCS Santa Lucia Foundation                                                                                                                                                                                                                                                                                                                                                                                                                                    | INMI Lazzaro Spallanzani IRCCS                                                                                                                                         | M Rueca, E Giombini, C.E.M Gruber, B Bartolini, O Butera, F Messina, E Giardina, A Di Caro, MR Capobianchi                                                                                                                                                                                                                                                                                                                                                                                                                                                                                                                                                                                                                                                                             |
| EPI_ISL_882924                                                                                                                                                                                                                                                                                                                                                                                                                                                                                                                                                                                                                                                                                                                                                                                                                                                                                                                                                                                                                                                                                                                                                                                                                                                                                                                                                                                                                                                                                                                                                                                                                                                                                                                                                                                                                                                                                                                                                                                                                                                                                                                                                                                                                                                                                                                                                                                                                                                                                 | INMI Lazzaro Spallanzani IRCCS                                                                                                                                                                                                                                                                                                                                                                                                                                                               | INMI Lazzaro Spallanzani IRCCS                                                                                                                                         | F Messina, O Butera, E Giombini, M Rueca, B Bartolini, C.E.M Gruber, MR Capobianchi, A Di Caro                                                                                                                                                                                                                                                                                                                                                                                                                                                                                                                                                                                                                                                                                         |
| EPI_ISL_882925                                                                                                                                                                                                                                                                                                                                                                                                                                                                                                                                                                                                                                                                                                                                                                                                                                                                                                                                                                                                                                                                                                                                                                                                                                                                                                                                                                                                                                                                                                                                                                                                                                                                                                                                                                                                                                                                                                                                                                                                                                                                                                                                                                                                                                                                                                                                                                                                                                                                                 | INMI Lazzaro Spallanzani IRCCS                                                                                                                                                                                                                                                                                                                                                                                                                                                               | INMI Lazzaro Spallanzani IRCCS                                                                                                                                         | C.E.M Gruber, B Bartolini, E Giombini, M Rueca, O Butera, F Messina, A Di Caro, MR Capobianchi                                                                                                                                                                                                                                                                                                                                                                                                                                                                                                                                                                                                                                                                                         |
| EPI_ISL_882958, EPI_ISL_882959, EPI_ISL_882962                                                                                                                                                                                                                                                                                                                                                                                                                                                                                                                                                                                                                                                                                                                                                                                                                                                                                                                                                                                                                                                                                                                                                                                                                                                                                                                                                                                                                                                                                                                                                                                                                                                                                                                                                                                                                                                                                                                                                                                                                                                                                                                                                                                                                                                                                                                                                                                                                                                 | National Institute of Public Health - National Institute of Hygiene                                                                                                                                                                                                                                                                                                                                                                                                                          | National Institute of Public Health - National Institute of Hygiene                                                                                                    | Wokowicz Tomasz, Zacharczuk Katarzyna, Gawor Jan                                                                                                                                                                                                                                                                                                                                                                                                                                                                                                                                                                                                                                                                                                                                       |
| EPI_ISL_883006, EPI_ISL_883007, EPI_ISL_883008, EPI_ISL_883009, EPI_ISL_883010, EPI_ISL_883033, EPI_ISL_883034                                                                                                                                                                                                                                                                                                                                                                                                                                                                                                                                                                                                                                                                                                                                                                                                                                                                                                                                                                                                                                                                                                                                                                                                                                                                                                                                                                                                                                                                                                                                                                                                                                                                                                                                                                                                                                                                                                                                                                                                                                                                                                                                                                                                                                                                                                                                                                                 | Maryland Public Health Laboratory                                                                                                                                                                                                                                                                                                                                                                                                                                                            | Maryland Public Health Laboratory                                                                                                                                      | Maryland Department of Health Laboratories Administration                                                                                                                                                                                                                                                                                                                                                                                                                                                                                                                                                                                                                                                                                                                              |
| EPI_ISL_883198, EPI_ISL_883200, EPI_ISL_883201, EPI_ISL_883202, EPI_ISL_883203, EPI_ISL_883204, EPI_ISL_883205, EPI_ISL_883206, EPI_ISL_883207, EPI_ISL_883210, EPI_ISL_883211, EPI_ISL_883216, EPI_ISL_883217, EPI_ISL_883218, EPI_ISL_883219, EPI_ISL_883220, EPI_ISL_883221, EPI_ISL_883222, EPI_ISL_883223, EPI_ISL_883224, EPI_ISL_883225, EPI_ISL_883228, EPI_ISL_883228, EPI_ISL_883235, EPI_ISL_883236, EPI_ISL_883237, EPI_ISL_883238, EPI_ISL_883239, EPI_ISL_883240, EPI_ISL_883241, EPI_ISL_883242, EPI_ISL_883243, EPI_ISL_883244, EPI_ISL_883245, EPI_ISL_883246, EPI_ISL_883247, EPI_ISL_883250, EPI_ISL_883257, EPI_ISL_883258, EPI_ISL_883259, EPI_ISL_883260, EPI_ISL_883261, EPI_ISL_883262, EPI_ISL_883263, EPI_ISL_883264, EPI_ISL_883265, EPI_ISL_883266, EPI_ISL_883267, EPI_ISL_883270, EPI_ISL_883273, EPI_ISL_883274, EPI_ISL_883275, EPI_ISL_883276, EPI_ISL_883277, EPI_ISL_883278, EPI_ISL_883279, EPI_ISL_883280, EPI_ISL_883281, EPI_ISL_883283, EPI_ISL_883284                                                                                                                                                                                                                                                                                                                                                                                                                                                                                                                                                                                                                                                                                                                                                                                                                                                                                                                                                                                                                                                                                                                                                                                                                                                                                                                                                                                                                                                                                                 |                                                                                                                                                                                                                                                                                                                                                                                                                                                                                              |                                                                                                                                                                        |                                                                                                                                                                                                                                                                                                                                                                                                                                                                                                                                                                                                                                                                                                                                                                                        |
| see above                                                                                                                                                                                                                                                                                                                                                                                                                                                                                                                                                                                                                                                                                                                                                                                                                                                                                                                                                                                                                                                                                                                                                                                                                                                                                                                                                                                                                                                                                                                                                                                                                                                                                                                                                                                                                                                                                                                                                                                                                                                                                                                                                                                                                                                                                                                                                                                                                                                                                      | Eurofins Diatherix                                                                                                                                                                                                                                                                                                                                                                                                                                                                           | Hudsonalpha Genome Sequencing Center                                                                                                                                   | Jane Grimwood, Melissa Williams, Lori H. Handley, Joshua Stough, Leslie Malone, Stefan Brzezinski, Ada Stewart, Teresa Jones, Jenell Webber, John Lovell, Jennifer Cart, and Jeremy Schmutz                                                                                                                                                                                                                                                                                                                                                                                                                                                                                                                                                                                            |
| EPI_ISL_883350                                                                                                                                                                                                                                                                                                                                                                                                                                                                                                                                                                                                                                                                                                                                                                                                                                                                                                                                                                                                                                                                                                                                                                                                                                                                                                                                                                                                                                                                                                                                                                                                                                                                                                                                                                                                                                                                                                                                                                                                                                                                                                                                                                                                                                                                                                                                                                                                                                                                                 | OCME Office Of Chief Medical Examiner                                                                                                                                                                                                                                                                                                                                                                                                                                                        | New York City Public Health Laboratory                                                                                                                                 | Jade Wang, et al.                                                                                                                                                                                                                                                                                                                                                                                                                                                                                                                                                                                                                                                                                                                                                                      |
| EPI_ISL_883501, EPI_ISL_883502, EPI_ISL_883503, EPI_ISL_883504, EPI_ISL_883505, EPI_ISL_883506, EPI_ISL_883519, EPI_ISL_883520, EPI_ISL_883521, EPI_ISL_883522, EPI_ISL_883523, EPI_ISL_883524, EPI_ISL_883537, EPI_ISL_883538, EPI_ISL_883539, EPI_ISL_883540, EPI_ISL_883541, EPI_ISL_883542, EPI_ISL_883555, EPI_ISL_883556, EPI_ISL_883557, EPI_ISL_883558, EPI_ISL_883559, EPI_ISL_883560, EPI_ISL_883575, EPI_ISL_883576, EPI_ISL_883577, EPI_ISL_883578, EPI_ISL_883579, EPI_ISL_883580, EPI_ISL_883595, EPI_ISL_883596, EPI_ISL_883597, EPI_ISL_883598, EPI_ISL_883599, EPI_ISL_883600, EPI_ISL_883613, EPI_ISL_883614, EPI_ISL_883615, EPI_ISL_883616, EPI_ISL_883617, EPI_ISL_883618, EPI_ISL_883633, EPI_ISL_883634, EPI_ISL_883635, EPI_ISL_883636, EPI_ISL_883637, EPI_ISL_883638, EPI_ISL_883651, EPI_ISL_883652, EPI_ISL_883653, EPI_ISL_883654, EPI_ISL_883655, EPI_ISL_883656, EPI_ISL_883670, EPI_ISL_883671, EPI_ISL_883672, EPI_ISL_883673, EPI_ISL_883674, EPI_ISL_883675, EPI_ISL_883689, EPI_ISL_883691, EPI_ISL_883692, EPI_ISL_883693, EPI_ISL_883694, EPI_ISL_883696, EPI_ISL_883709, EPI_ISL_883710, EPI_ISL_883711, EPI_ISL_883712, EPI_ISL_883713, EPI_ISL_883714, EPI_ISL_883727, EPI_ISL_883728, EPI_ISL_883729, EPI_ISL_883730, EPI_ISL_883731, EPI_ISL_883732, EPI_ISL_883745, EPI_ISL_883746, EPI_ISL_883747, EPI_ISL_883748, EPI_ISL_883749, EPI_ISL_883750, EPI_ISL_883763, EPI_ISL_883764, EPI_ISL_883765, EPI_ISL_883766, EPI_ISL_883767, EPI_ISL_883768, EPI_ISL_883787, EPI_ISL_883788, EPI_ISL_883789, EPI_ISL_883790, EPI_ISL_883791, EPI_ISL_883792, EPI_ISL_883805, EPI_ISL_883806, EPI_ISL_883807, EPI_ISL_883808, EPI_ISL_883809, EPI_ISL_883810, EPI_ISL_883823, EPI_ISL_883824, EPI_ISL_883825, EPI_ISL_883826, EPI_ISL_883827, EPI_ISL_883828, EPI_ISL_883841, EPI_ISL_883842, EPI_ISL_883843, EPI_ISL_883844, EPI_ISL_883845, EPI_ISL_883846, EPI_ISL_883860, EPI_ISL_883861, EPI_ISL_883868, EPI_ISL_883869, EPI_ISL_883871, EPI_ISL_883872, EPI_ISL_883885, EPI_ISL_883886, EPI_ISL_883887, EPI_ISL_883888, EPI_ISL_883889, EPI_ISL_883890, EPI_ISL_883904, EPI_ISL_883906, EPI_ISL_883907, EPI_ISL_883908, EPI_ISL_883909, EPI_ISL_883910, EPI_ISL_883923, EPI_ISL_883924, EPI_ISL_883925, EPI_ISL_883927, EPI_ISL_883928, EPI_ISL_883929, EPI_ISL_883943, EPI_ISL_883944, EPI_ISL_883945, EPI_ISL_883946, EPI_ISL_883947, EPI_ISL_883948, EPI_ISL_883950, EPI_ISL_883951, EPI_ISL_883952, EPI_ISL_883954, EPI_ISL_883955, EPI_ISL_883956 |                                                                                                                                                                                                                                                                                                                                                                                                                                                                                              |                                                                                                                                                                        |                                                                                                                                                                                                                                                                                                                                                                                                                                                                                                                                                                                                                                                                                                                                                                                        |
| see above                                                                                                                                                                                                                                                                                                                                                                                                                                                                                                                                                                                                                                                                                                                                                                                                                                                                                                                                                                                                                                                                                                                                                                                                                                                                                                                                                                                                                                                                                                                                                                                                                                                                                                                                                                                                                                                                                                                                                                                                                                                                                                                                                                                                                                                                                                                                                                                                                                                                                      | Eurofins Diatherix                                                                                                                                                                                                                                                                                                                                                                                                                                                                           | Hudsonalpha Genome Sequencing Center                                                                                                                                   | Jane Grimwood, Melissa Williams, Lori H. Handley, Joshua Stough, Leslie Malone, Stefan Brzezinski, Ada Stewart, Teresa Jones, Jenell Webber, John Lovell, Jennifer Cart, and Jeremy Schmutz                                                                                                                                                                                                                                                                                                                                                                                                                                                                                                                                                                                            |
| EPI_ISL_883998, EPI_ISL_883999                                                                                                                                                                                                                                                                                                                                                                                                                                                                                                                                                                                                                                                                                                                                                                                                                                                                                                                                                                                                                                                                                                                                                                                                                                                                                                                                                                                                                                                                                                                                                                                                                                                                                                                                                                                                                                                                                                                                                                                                                                                                                                                                                                                                                                                                                                                                                                                                                                                                 | Labo Analyses Med                                                                                                                                                                                                                                                                                                                                                                                                                                                                            | National Reference Center for Viruses of Respiratory Infections, Institut Pasteur, Paris                                                                               | Marion Barbet, Sylvie Behillil, Méline Bizard, Angela Brisebarre, Camille Capel, Etienne Simon-Lorière, Vincent Enouf, Maud Vanpeene, Sylvie van der Werf, Rousset Dominique                                                                                                                                                                                                                                                                                                                                                                                                                                                                                                                                                                                                           |
| EPI_ISL_884087                                                                                                                                                                                                                                                                                                                                                                                                                                                                                                                                                                                                                                                                                                                                                                                                                                                                                                                                                                                                                                                                                                                                                                                                                                                                                                                                                                                                                                                                                                                                                                                                                                                                                                                                                                                                                                                                                                                                                                                                                                                                                                                                                                                                                                                                                                                                                                                                                                                                                 | Wazed Mia Science Research Center, Jahangirnagar University in collaboration with GRMDRC, Dhaka and Invent Technologies Ltd, Dhaka, Bangladesh                                                                                                                                                                                                                                                                                                                                               | COVID Research Cell (CRC), Wazed Miah Science Research Center                                                                                                          | Md. Abdul Matin, Bishajit Sarkar, Md. Asad Ullah, Yusha Araf, Nihad Adnan, Abdullah Al Nahid, Rashedul Islam, Mohammad Shahedur Rahman                                                                                                                                                                                                                                                                                                                                                                                                                                                                                                                                                                                                                                                 |
| EPI_ISL_884857, EPI_ISL_884858, EPI_ISL_884859, EPI_ISL_884861, EPI_ISL_884862, EPI_ISL_884863                                                                                                                                                                                                                                                                                                                                                                                                                                                                                                                                                                                                                                                                                                                                                                                                                                                                                                                                                                                                                                                                                                                                                                                                                                                                                                                                                                                                                                                                                                                                                                                                                                                                                                                                                                                                                                                                                                                                                                                                                                                                                                                                                                                                                                                                                                                                                                                                 | Bacteriology, Georgia Public Health Laboratory (GPHL)                                                                                                                                                                                                                                                                                                                                                                                                                                        | Bacteriology, Georgia Public Health Laboratory (GPHL)                                                                                                                  | Reeves,S., Edwards,J., Dixey,C., Parrott,T.                                                                                                                                                                                                                                                                                                                                                                                                                                                                                                                                                                                                                                                                                                                                            |
| EPI_ISL_884873, EPI_ISL_884879, EPI_ISL_884885, EPI_ISL_884886, EPI_ISL_884887, EPI_ISL_884888, EPI_ISL_884892, EPI_ISL_884894, EPI_ISL_884895, EPI_ISL_884896, EPI_ISL_884897, EPI_ISL_884903, EPI_ISL_884917, EPI_ISL_884922, EPI_ISL_884923, EPI_ISL_884924, EPI_ISL_884931, EPI_ISL_884933, EPI_ISL_884934, EPI_ISL_884937, EPI_ISL_884938, EPI_ISL_884940, EPI_ISL_884941, EPI_ISL_884943, EPI_ISL_884945, EPI_ISL_884955, EPI_ISL_884956, EPI_ISL_884958, EPI_ISL_884966, EPI_ISL_884968, EPI_ISL_884971, EPI_ISL_884974, EPI_ISL_884976, EPI_ISL_884977, EPI_ISL_884980, EPI_ISL_884981, EPI_ISL_884986, EPI_ISL_884987, EPI_ISL_884989, EPI_ISL_884999, EPI_ISL_885013, EPI_ISL_885014, EPI_ISL_885015, EPI_ISL_885051                                                                                                                                                                                                                                                                                                                                                                                                                                                                                                                                                                                                                                                                                                                                                                                                                                                                                                                                                                                                                                                                                                                                                                                                                                                                                                                                                                                                                                                                                                                                                                                                                                                                                                                                                                 |                                                                                                                                                                                                                                                                                                                                                                                                                                                                                              |                                                                                                                                                                        |                                                                                                                                                                                                                                                                                                                                                                                                                                                                                                                                                                                                                                                                                                                                                                                        |
| see above                                                                                                                                                                                                                                                                                                                                                                                                                                                                                                                                                                                                                                                                                                                                                                                                                                                                                                                                                                                                                                                                                                                                                                                                                                                                                                                                                                                                                                                                                                                                                                                                                                                                                                                                                                                                                                                                                                                                                                                                                                                                                                                                                                                                                                                                                                                                                                                                                                                                                      | Santa Clara County Public Health Laboratory                                                                                                                                                                                                                                                                                                                                                                                                                                                  | Chan-Zuckerberg Biohub                                                                                                                                                 | CZB Cllahub Consortium                                                                                                                                                                                                                                                                                                                                                                                                                                                                                                                                                                                                                                                                                                                                                                 |







|                                                                                                                                                                                                                                                                                                                                                                                                                                                                                                                                                                |                                                                                                                |                                                                                                                                                                                                                                                                                                                                                                                                                                                                  |                                                                                                                                                                                                                                                                                                                                                                                                                                                                                                 |
|----------------------------------------------------------------------------------------------------------------------------------------------------------------------------------------------------------------------------------------------------------------------------------------------------------------------------------------------------------------------------------------------------------------------------------------------------------------------------------------------------------------------------------------------------------------|----------------------------------------------------------------------------------------------------------------|------------------------------------------------------------------------------------------------------------------------------------------------------------------------------------------------------------------------------------------------------------------------------------------------------------------------------------------------------------------------------------------------------------------------------------------------------------------|-------------------------------------------------------------------------------------------------------------------------------------------------------------------------------------------------------------------------------------------------------------------------------------------------------------------------------------------------------------------------------------------------------------------------------------------------------------------------------------------------|
|                                                                                                                                                                                                                                                                                                                                                                                                                                                                                                                                                                |                                                                                                                | Mosquito Program (WMP) Yogyakarta Center for Tropical Medicine FK-KMK UGM; Integrated Research center FK-KMK UGM; Department of Computer Science and Electronics FMIPA UGM                                                                                                                                                                                                                                                                                       |                                                                                                                                                                                                                                                                                                                                                                                                                                                                                                 |
| EPI_ISL_902749                                                                                                                                                                                                                                                                                                                                                                                                                                                                                                                                                 | RSA UGM                                                                                                        | Genetics Working Group (Pokja Genetik) Faculty of Medicine, Public Health and Nursing Universitas Gadjah Mada (FK-KMK UGM); Disease Investigation Center Wates Ministry of Agriculture Indonesia; Department of Microbiology FK-KMK UGM; Laboratorium Diagnostik Yayasan Tahija World Mosquito Program (WMP) Yogyakarta Center for Tropical Medicine FK-KMK UGM; Integrated Research center FK-KMK UGM; Department of Computer Science and Electronics FMIPA UGM | Gunadi, Hendra Wibawa, Marcellus, Mohamad S. Hakim, Edwin W. Daniwijaya, Ludhang P. Rizki, Endah Supriyati, Eggi Arguni, Titik Nuryastuti, Tri Wibawa, Dwi AA Nugrahaningsih, Afiahayati, Siswanto, Kristy Iskandar, Nungki Anggorowati, Dyah Ayu Puspitarani, Dwiki afandy                                                                                                                                                                                                                     |
| EPI_ISL_902758, EPI_ISL_902856, EPI_ISL_902857, EPI_ISL_902858, EPI_ISL_902859, EPI_ISL_902860, EPI_ISL_902861, EPI_ISL_902862, EPI_ISL_902863, EPI_ISL_902864, EPI_ISL_902865, EPI_ISL_902866, EPI_ISL_902867, EPI_ISL_902868, EPI_ISL_902869, EPI_ISL_902870, EPI_ISL_902871, EPI_ISL_902872, EPI_ISL_902873, EPI_ISL_902874, EPI_ISL_902875, EPI_ISL_902876, EPI_ISL_902877, EPI_ISL_902878, EPI_ISL_902879, EPI_ISL_902880, EPI_ISL_902881, EPI_ISL_902882, EPI_ISL_902883, EPI_ISL_902884, EPI_ISL_902885, EPI_ISL_902886, EPI_ISL_902887, EPI_ISL_902888 |                                                                                                                |                                                                                                                                                                                                                                                                                                                                                                                                                                                                  |                                                                                                                                                                                                                                                                                                                                                                                                                                                                                                 |
| see above                                                                                                                                                                                                                                                                                                                                                                                                                                                                                                                                                      | Department of Virology and Immunology, University of Helsinki and Helsinki University Hospital, Huslab Finland | Department of Virology, Faculty of Medicine, University of Helsinki, Helsinki, Finland                                                                                                                                                                                                                                                                                                                                                                           | Teemu Smura, Ravi Kant, Phuoc Truong, Hussein Alburkat, Hannimari Kallio-Kokko, Jenni Virtanen, Maija Suvanto, Essi Korhonen, Sari Hannula, Harri Kangas, Hanna Liimatainen, Satu Kurkela, Hanna Jarva, Maija Lappalainen, Pekka Ellonen, Olli Vapalahti                                                                                                                                                                                                                                        |
| EPI_ISL_903025                                                                                                                                                                                                                                                                                                                                                                                                                                                                                                                                                 | Seattle Flu Study                                                                                              | Seattle Flu Study                                                                                                                                                                                                                                                                                                                                                                                                                                                | Deborah A. Nickerson, Chris D. Frazar, Jover Lee, Benjamin Pelle, Erica Ryke, Matthew Richardson, Amanda Adler, Elisabeth Brandstetter, Peter D. Han, Kairsten Fay, Misja Ilcisin, Kirsten Lacombe, Thomas R. Sibley, Melissa Truong, Caitlin R. Wolf, Karen Cowgill, Stephanie Schrag, Jeff Duchin, Michael Boeckh, Janet A. Englund, Michael Famulare, Barry R. Lutz, Mark J. Rieder, Lea M. Starita, Matthew Thompson, Helen Y. Chu, Trevor Bedford, Jay Shendure                            |
| EPI_ISL_903048                                                                                                                                                                                                                                                                                                                                                                                                                                                                                                                                                 | Seattle Flu Study                                                                                              | Seattle Flu Study                                                                                                                                                                                                                                                                                                                                                                                                                                                | Deborah A. Nickerson, Chris D. Frazar, Jover Lee, Benjamin Pelle, Erica Ryke, Matthew Richardson, Amanda Adler, Elisabeth Brandstetter, Peter D. Han, Kairsten Fay, Misja Ilcisin, Kirsten Lacombe, Thomas R. Sibley, Melissa Truong, Caitlin R. Wolf, Michael Boeckh, Janet A. Englund, Michael Famulare, Barry R. Lutz, Mark J. Rieder, Lea M. Starita, Matthew Thompson, Jay Shendure, Trevor Bedford, Helen Y. Chu                                                                          |
| EPI_ISL_903117                                                                                                                                                                                                                                                                                                                                                                                                                                                                                                                                                 | Washington State Department of Health                                                                          | Seattle Flu Study                                                                                                                                                                                                                                                                                                                                                                                                                                                | Deborah A. Nickerson, Chris D. Frazar, Jover Lee, Benjamin Pelle, Erica Ryke, Matthew Richardson, Amanda Adler, Elisabeth Brandstetter, Peter D. Han, Kairsten Fay, Misja Ilcisin, Kirsten Lacombe, Thomas R. Sibley, Melissa Truong, Caitlin R. Wolf, Romesh Gautom, Geoff Melly, Brian Hiatt, Philip Dykema, Scott Lindquist, Michael Boeckh, Janet A. Englund, Michael Famulare, Barry R. Lutz, Mark J. Rieder, Lea M. Starita, Matthew Thompson, Helen Y. Chu, Jay Shendure, Trevor Bedford |
| EPI_ISL_903240, EPI_ISL_903241, EPI_ISL_903243, EPI_ISL_903244, EPI_ISL_903247, EPI_ISL_903249, EPI_ISL_903250, EPI_ISL_903251, EPI_ISL_903252, EPI_ISL_903254, EPI_ISL_903259, EPI_ISL_903260, EPI_ISL_903261, EPI_ISL_903262, EPI_ISL_903263, EPI_ISL_903268, EPI_ISL_903269, EPI_ISL_903270, EPI_ISL_903271, EPI_ISL_903272, EPI_ISL_903274, EPI_ISL_903275, EPI_ISL_903277, EPI_ISL_903278, EPI_ISL_903279, EPI_ISL_903280, EPI_ISL_903286                                                                                                                 |                                                                                                                |                                                                                                                                                                                                                                                                                                                                                                                                                                                                  |                                                                                                                                                                                                                                                                                                                                                                                                                                                                                                 |
| see above                                                                                                                                                                                                                                                                                                                                                                                                                                                                                                                                                      | M Health Fairview                                                                                              | Minnesota Department of Health, Public Health Laboratory                                                                                                                                                                                                                                                                                                                                                                                                         | Alexandra Lorentz, Jacob Garfin, Matt Plumb, and Xiong Wang                                                                                                                                                                                                                                                                                                                                                                                                                                     |
| EPI_ISL_903369                                                                                                                                                                                                                                                                                                                                                                                                                                                                                                                                                 | Los Angeles County PHL                                                                                         | Los Angeles County PHL                                                                                                                                                                                                                                                                                                                                                                                                                                           | P. Hemarajata et al.                                                                                                                                                                                                                                                                                                                                                                                                                                                                            |
| EPI_ISL_903639                                                                                                                                                                                                                                                                                                                                                                                                                                                                                                                                                 | AR Dept. of Health-Public Health Lab                                                                           | Genomics and Discovery, Respiratory Viruses Branch, Division of Viral Diseases, Centers for Disease Control and Prevention                                                                                                                                                                                                                                                                                                                                       | Krista Queen, Yan Li, Ying Tao, Jing Zhang, Anna Uehara, Anna Montmayeur, Clinton R. Paden, Peter W. Cook, Rachel Marine, Mili Sheth, Jasmine Padilla, Sarah Nobles, Mark Burroughs, Lori Rowe, Haibin Wang, Ben L. Rambo-Martin, Dhvani Batra, Justin Lee, Suxiang Tong                                                                                                                                                                                                                        |
| EPI_ISL_903659                                                                                                                                                                                                                                                                                                                                                                                                                                                                                                                                                 | MN PHL Division, Minnesota Department of Health                                                                | Genomics and Discovery, Respiratory Viruses Branch, Division of Viral Diseases, Centers for Disease Control and Prevention                                                                                                                                                                                                                                                                                                                                       | Krista Queen, Yan Li, Ying Tao, Jing Zhang, Anna Uehara, Anna Montmayeur, Clinton R. Paden, Peter W. Cook, Rachel Marine, Mili Sheth, Jasmine Padilla, Sarah Nobles, Mark Burroughs, Lori Rowe, Haibin Wang, Ben L. Rambo-Martin, Dhvani Batra, Justin Lee, Suxiang Tong                                                                                                                                                                                                                        |
| EPI_ISL_903664                                                                                                                                                                                                                                                                                                                                                                                                                                                                                                                                                 | NV State Public Health Laboratory                                                                              | Genomics and Discovery, Respiratory Viruses Branch, Division of Viral Diseases, Centers for Disease Control and Prevention                                                                                                                                                                                                                                                                                                                                       | Krista Queen, Yan Li, Ying Tao, Jing Zhang, Anna Uehara, Anna Montmayeur, Clinton R. Paden, Peter W. Cook, Rachel Marine, Mili Sheth, Jasmine Padilla, Sarah Nobles, Mark Burroughs, Lori Rowe, Haibin Wang, Ben L. Rambo-Martin, Dhvani Batra, Justin Lee, Suxiang Tong                                                                                                                                                                                                                        |
| EPI_ISL_903666                                                                                                                                                                                                                                                                                                                                                                                                                                                                                                                                                 | OR State PHL-Virology/Immunology Section                                                                       | Genomics and Discovery, Respiratory Viruses Branch, Division of Viral Diseases, Centers for Disease Control and Prevention                                                                                                                                                                                                                                                                                                                                       | Krista Queen, Yan Li, Ying Tao, Jing Zhang, Anna Uehara, Anna Montmayeur, Clinton R. Paden, Peter W. Cook, Rachel Marine, Mili Sheth, Jasmine Padilla, Sarah Nobles, Mark Burroughs, Lori Rowe, Haibin Wang, Ben L. Rambo-Martin, Dhvani Batra, Justin Lee, Suxiang Tong                                                                                                                                                                                                                        |
| EPI_ISL_903693                                                                                                                                                                                                                                                                                                                                                                                                                                                                                                                                                 | LA Office of Public Health Laboratories                                                                        | Genomics and Discovery, Respiratory Viruses Branch, Division of Viral Diseases, Centers for Disease Control and Prevention                                                                                                                                                                                                                                                                                                                                       | Krista Queen, Yan Li, Ying Tao, Jing Zhang, Anna Uehara, Anna Montmayeur, Clinton R. Paden, Peter W. Cook, Rachel Marine, Mili Sheth, Jasmine Padilla, Sarah Nobles, Mark Burroughs, Lori Rowe, Haibin Wang, Ben L. Rambo-Martin, Dhvani Batra, Justin Lee, Suxiang Tong                                                                                                                                                                                                                        |
| EPI_ISL_903694                                                                                                                                                                                                                                                                                                                                                                                                                                                                                                                                                 | VT Dept. of Health Laboratory                                                                                  | Genomics and Discovery, Respiratory Viruses Branch, Division of Viral Diseases, Centers for Disease Control and Prevention                                                                                                                                                                                                                                                                                                                                       | Krista Queen, Yan Li, Ying Tao, Jing Zhang, Anna Uehara, Anna Montmayeur, Clinton R. Paden, Peter W. Cook, Rachel Marine, Mili Sheth, Jasmine Padilla, Sarah Nobles, Mark Burroughs, Lori Rowe, Haibin Wang, Ben L. Rambo-Martin, Dhvani Batra, Justin Lee, Suxiang Tong                                                                                                                                                                                                                        |
| EPI_ISL_903695                                                                                                                                                                                                                                                                                                                                                                                                                                                                                                                                                 | OK Public Health Laboratory, Oklahoma State DOH                                                                | Genomics and Discovery, Respiratory Viruses Branch, Division of Viral Diseases, Centers for Disease Control and Prevention                                                                                                                                                                                                                                                                                                                                       | Krista Queen, Yan Li, Ying Tao, Jing Zhang, Anna Uehara, Anna Montmayeur, Clinton R. Paden, Peter W. Cook, Rachel Marine, Mili Sheth, Jasmine Padilla, Sarah Nobles, Mark Burroughs, Lori Rowe, Haibin Wang, Ben L. Rambo-Martin, Dhvani Batra, Justin Lee, Suxiang Tong                                                                                                                                                                                                                        |
| EPI_ISL_903703, EPI_ISL_903731                                                                                                                                                                                                                                                                                                                                                                                                                                                                                                                                 | NV State Public Health Laboratory                                                                              | Genomics and Discovery, Respiratory Viruses Branch, Division of Viral Diseases, Centers for Disease Control and Prevention                                                                                                                                                                                                                                                                                                                                       | Krista Queen, Yan Li, Ying Tao, Jing Zhang, Anna Uehara, Anna Montmayeur, Clinton R. Paden, Peter W. Cook, Rachel Marine, Mili Sheth, Jasmine Padilla, Sarah Nobles, Mark Burroughs, Lori Rowe, Haibin Wang, Ben L. Rambo-Martin, Dhvani Batra, Justin Lee, Suxiang Tong                                                                                                                                                                                                                        |
| EPI_ISL_903736                                                                                                                                                                                                                                                                                                                                                                                                                                                                                                                                                 | PA Department of Health, Bureau of Laboratories                                                                | Genomics and Discovery, Respiratory Viruses Branch, Division of Viral Diseases, Centers for Disease Control and Prevention                                                                                                                                                                                                                                                                                                                                       | Krista Queen, Yan Li, Ying Tao, Jing Zhang, Anna Uehara, Anna Montmayeur, Clinton R. Paden, Peter W. Cook, Rachel Marine, Mili Sheth, Jasmine Padilla, Sarah Nobles, Mark Burroughs, Lori Rowe, Haibin Wang, Ben L. Rambo-Martin, Dhvani Batra, Justin Lee, Suxiang Tong                                                                                                                                                                                                                        |
| EPI_ISL_903739                                                                                                                                                                                                                                                                                                                                                                                                                                                                                                                                                 | LA Office of Public Health Laboratories                                                                        | Genomics and Discovery, Respiratory Viruses Branch, Division of Viral Diseases, Centers for Disease Control and Prevention                                                                                                                                                                                                                                                                                                                                       | Krista Queen, Yan Li, Ying Tao, Jing Zhang, Anna Uehara, Anna Montmayeur, Clinton R. Paden, Peter W. Cook, Rachel Marine, Mili Sheth, Jasmine Padilla, Sarah Nobles, Mark Burroughs, Lori Rowe, Haibin Wang, Ben L. Rambo-Martin, Dhvani Batra, Justin Lee, Suxiang Tong                                                                                                                                                                                                                        |
| EPI_ISL_903740                                                                                                                                                                                                                                                                                                                                                                                                                                                                                                                                                 | NM Dept. Health, Scientific Laboratory Division                                                                | Genomics and Discovery, Respiratory Viruses Branch, Division of Viral Diseases, Centers for Disease Control and Prevention                                                                                                                                                                                                                                                                                                                                       | Krista Queen, Yan Li, Ying Tao, Jing Zhang, Anna Uehara, Anna Montmayeur, Clinton R. Paden, Peter W. Cook, Rachel Marine, Mili Sheth, Jasmine Padilla, Sarah Nobles, Mark Burroughs, Lori Rowe, Haibin Wang, Ben L. Rambo-Martin, Dhvani Batra, Justin Lee, Suxiang Tong                                                                                                                                                                                                                        |
| EPI_ISL_903751                                                                                                                                                                                                                                                                                                                                                                                                                                                                                                                                                 | PA Department of Health, Bureau of Laboratories                                                                | Genomics and Discovery, Respiratory Viruses Branch, Division of Viral Diseases, Centers for Disease Control and Prevention                                                                                                                                                                                                                                                                                                                                       | Krista Queen, Yan Li, Ying Tao, Jing Zhang, Anna Uehara, Anna Montmayeur, Clinton R. Paden, Peter W. Cook, Rachel Marine, Mili Sheth, Jasmine Padilla, Sarah Nobles, Mark Burroughs, Lori Rowe, Haibin Wang, Ben L. Rambo-Martin, Dhvani Batra, Justin Lee, Suxiang Tong                                                                                                                                                                                                                        |
| EPI_ISL_903777                                                                                                                                                                                                                                                                                                                                                                                                                                                                                                                                                 | NC State Laboratory of Public Health                                                                           | Genomics and Discovery, Respiratory Viruses Branch, Division of Viral Diseases, Centers for Disease Control and Prevention                                                                                                                                                                                                                                                                                                                                       | Krista Queen, Yan Li, Ying Tao, Jing Zhang, Anna Uehara, Anna Montmayeur, Clinton R. Paden, Peter W. Cook, Rachel Marine, Mili Sheth, Jasmine Padilla, Sarah Nobles, Mark Burroughs, Lori Rowe, Haibin Wang, Ben L. Rambo-Martin, Dhvani Batra, Justin Lee, Suxiang Tong                                                                                                                                                                                                                        |
| EPI_ISL_903778                                                                                                                                                                                                                                                                                                                                                                                                                                                                                                                                                 | PA Department of Health, Bureau of Laboratories                                                                | Genomics and Discovery, Respiratory Viruses Branch, Division of Viral Diseases, Centers for Disease Control and Prevention                                                                                                                                                                                                                                                                                                                                       | Krista Queen, Yan Li, Ying Tao, Jing Zhang, Anna Uehara, Anna Montmayeur, Clinton R. Paden, Peter W. Cook, Rachel Marine, Mili Sheth, Jasmine Padilla, Sarah Nobles, Mark Burroughs, Lori Rowe, Haibin Wang, Ben L. Rambo-Martin, Dhvani Batra, Justin Lee, Suxiang Tong                                                                                                                                                                                                                        |
| EPI_ISL_903807                                                                                                                                                                                                                                                                                                                                                                                                                                                                                                                                                 | IL Dept. of Public Health Springfield Laboratory                                                               | Genomics and Discovery, Respiratory Viruses Branch,                                                                                                                                                                                                                                                                                                                                                                                                              | Krista Queen, Yan Li, Ying Tao, Jing Zhang, Anna Uehara, Anna Montmayeur, Clinton R. Paden, Peter W. Cook, Rachel Marine, Mili Sheth, Jasmine                                                                                                                                                                                                                                                                                                                                                   |



|                                                                                                                                                                                                                                                                                                                                                                                                                                                                                                                                                                                                                                                                                                                                                                                                                                                                                                                                                                                                                                                                                                                                                                                                                                                                                                                                                                                                                                                                                                                                                                                                                                                                                                                                                                                                                                                                                                                                                                                                                                                                                                                                                                                 |                                                                                                                   |                                                                                                                                                                                                                                                                                       |                                                                                                                                                                                                                                                                             |
|---------------------------------------------------------------------------------------------------------------------------------------------------------------------------------------------------------------------------------------------------------------------------------------------------------------------------------------------------------------------------------------------------------------------------------------------------------------------------------------------------------------------------------------------------------------------------------------------------------------------------------------------------------------------------------------------------------------------------------------------------------------------------------------------------------------------------------------------------------------------------------------------------------------------------------------------------------------------------------------------------------------------------------------------------------------------------------------------------------------------------------------------------------------------------------------------------------------------------------------------------------------------------------------------------------------------------------------------------------------------------------------------------------------------------------------------------------------------------------------------------------------------------------------------------------------------------------------------------------------------------------------------------------------------------------------------------------------------------------------------------------------------------------------------------------------------------------------------------------------------------------------------------------------------------------------------------------------------------------------------------------------------------------------------------------------------------------------------------------------------------------------------------------------------------------|-------------------------------------------------------------------------------------------------------------------|---------------------------------------------------------------------------------------------------------------------------------------------------------------------------------------------------------------------------------------------------------------------------------------|-----------------------------------------------------------------------------------------------------------------------------------------------------------------------------------------------------------------------------------------------------------------------------|
|                                                                                                                                                                                                                                                                                                                                                                                                                                                                                                                                                                                                                                                                                                                                                                                                                                                                                                                                                                                                                                                                                                                                                                                                                                                                                                                                                                                                                                                                                                                                                                                                                                                                                                                                                                                                                                                                                                                                                                                                                                                                                                                                                                                 |                                                                                                                   | Mosquito Program (WMP) Yogyakarta Center for Tropical Medicine FK-KMK UGM; Integrated Research center FK-KMK UGM; Department of Computer Science and Electronics FMIPA UGM                                                                                                            |                                                                                                                                                                                                                                                                             |
| EPI_ISL_905752, EPI_ISL_905753                                                                                                                                                                                                                                                                                                                                                                                                                                                                                                                                                                                                                                                                                                                                                                                                                                                                                                                                                                                                                                                                                                                                                                                                                                                                                                                                                                                                                                                                                                                                                                                                                                                                                                                                                                                                                                                                                                                                                                                                                                                                                                                                                  | Laboratorium Mikrobiologiczne SYNEVO                                                                              | National Institute of Public Health - National Institute of Hygiene                                                                                                                                                                                                                   | Wokowicz Tomasz, Zacharczuk Katarzyna                                                                                                                                                                                                                                       |
| EPI_ISL_905839, EPI_ISL_905862, EPI_ISL_905865                                                                                                                                                                                                                                                                                                                                                                                                                                                                                                                                                                                                                                                                                                                                                                                                                                                                                                                                                                                                                                                                                                                                                                                                                                                                                                                                                                                                                                                                                                                                                                                                                                                                                                                                                                                                                                                                                                                                                                                                                                                                                                                                  | OHSU Lab Services Molecular Microbiology Lab                                                                      | Oregon SARS-CoV-2 Genome Sequencing Center                                                                                                                                                                                                                                            | Brendan L. O'Connell, Sally Grindstaff, Kayla Carter, Ruth V. Nichols, Alec J. Hirsch, Donna Hansel, Guang Fan, Xuan, Qin, Daniel N. Streblow, William B. Messer, Andrew C. Adey, Benjamin N. Bimber, Brian J. O'Roak                                                       |
| EPI_ISL_906050                                                                                                                                                                                                                                                                                                                                                                                                                                                                                                                                                                                                                                                                                                                                                                                                                                                                                                                                                                                                                                                                                                                                                                                                                                                                                                                                                                                                                                                                                                                                                                                                                                                                                                                                                                                                                                                                                                                                                                                                                                                                                                                                                                  | RSA UGM                                                                                                           | Genetics Working Group (Pokja Genetik) Faculty of Medicine, Public Health and Nursing Universitas Gadjah Mada (FK-KMK UGM); Disease Investigation Center Wates Ministry of Agriculture Indonesia; Department of Microbiology FK-KMK UGM; Laboratorium Diagnostik Yayasan Tahija World | Gunadi, Hendra Wibawa, Marcellus, Mohamad S. Hakim, Edwin W. Daniwijaya, Ludhang P. Rizki, Endah Supriyati, Eggi Arguni, Titik Nuryastuti, Tri Wibawa, Dwi AA Nugrahaningsih, Afiahayati, Siswanto,Kristy Iskandar,Nungki Anggorowati, Susan Simanjaya, Kemala Athollah     |
|                                                                                                                                                                                                                                                                                                                                                                                                                                                                                                                                                                                                                                                                                                                                                                                                                                                                                                                                                                                                                                                                                                                                                                                                                                                                                                                                                                                                                                                                                                                                                                                                                                                                                                                                                                                                                                                                                                                                                                                                                                                                                                                                                                                 |                                                                                                                   | Mosquito Program (WMP) Yogyakarta Center for Tropical Medicine FK-KMK UGM; Integrated Research center FK-KMK UGM; Department of Computer Science and Electronics FMIPA UGM                                                                                                            |                                                                                                                                                                                                                                                                             |
| EPI_ISL_906051                                                                                                                                                                                                                                                                                                                                                                                                                                                                                                                                                                                                                                                                                                                                                                                                                                                                                                                                                                                                                                                                                                                                                                                                                                                                                                                                                                                                                                                                                                                                                                                                                                                                                                                                                                                                                                                                                                                                                                                                                                                                                                                                                                  | RSA UGM                                                                                                           | Genetics Working Group (Pokja Genetik) Faculty of Medicine, Public Health and Nursing Universitas Gadjah Mada (FK-KMK UGM); Disease Investigation Center Wates Ministry of Agriculture Indonesia; Department of Microbiology FK-KMK UGM; Laboratorium Diagnostik Yayasan Tahija World | Gunadi, Hendra Wibawa, Marcellus, Mohamad S. Hakim, Edwin W. Daniwijaya, Ludhang P. Rizki, Endah Supriyati, Eggi Arguni, Titik Nuryastuti, Tri Wibawa, Dwi AA Nugrahaningsih, Afiahayati, Siswanto, Kristy Iskandar, Nungki Anggorowati, Alvin Santoso Kalim, Dwiki Afandy  |
|                                                                                                                                                                                                                                                                                                                                                                                                                                                                                                                                                                                                                                                                                                                                                                                                                                                                                                                                                                                                                                                                                                                                                                                                                                                                                                                                                                                                                                                                                                                                                                                                                                                                                                                                                                                                                                                                                                                                                                                                                                                                                                                                                                                 |                                                                                                                   | Mosquito Program (WMP) Yogyakarta Center for Tropical Medicine FK-KMK UGM; Integrated Research center FK-KMK UGM; Department of Computer Science and Electronics FMIPA UGM                                                                                                            |                                                                                                                                                                                                                                                                             |
| EPI_ISL_906052                                                                                                                                                                                                                                                                                                                                                                                                                                                                                                                                                                                                                                                                                                                                                                                                                                                                                                                                                                                                                                                                                                                                                                                                                                                                                                                                                                                                                                                                                                                                                                                                                                                                                                                                                                                                                                                                                                                                                                                                                                                                                                                                                                  | RSA UGM                                                                                                           | Genetics Working Group (Pokja Genetik) Faculty of Medicine, Public Health and Nursing Universitas Gadjah Mada (FK-KMK UGM); Disease Investigation Center Wates Ministry of Agriculture Indonesia; Department of Microbiology FK-KMK UGM; Laboratorium Diagnostik Yayasan Tahija World | Gunadi, Hendra Wibawa, Marcellus, Mohamad S. Hakim, Edwin W. Daniwijaya, Ludhang P. Rizki, Endah Supriyati, Eggi Arguni, Titik Nuryastuti, Tri Wibawa, Dwi AA Nugrahaningsih, Afiahayati, Siswanto, Kristy Iskandar, Nungki Anggorowati, William Widiitjarso, Untung Riawan |
|                                                                                                                                                                                                                                                                                                                                                                                                                                                                                                                                                                                                                                                                                                                                                                                                                                                                                                                                                                                                                                                                                                                                                                                                                                                                                                                                                                                                                                                                                                                                                                                                                                                                                                                                                                                                                                                                                                                                                                                                                                                                                                                                                                                 |                                                                                                                   | Mosquito Program (WMP) Yogyakarta Center for Tropical Medicine FK-KMK UGM; Integrated Research center FK-KMK UGM; Department of Computer Science and Electronics FMIPA UGM                                                                                                            |                                                                                                                                                                                                                                                                             |
| EPI_ISL_906057, EPI_ISL_906058, EPI_ISL_906061, EPI_ISL_906062                                                                                                                                                                                                                                                                                                                                                                                                                                                                                                                                                                                                                                                                                                                                                                                                                                                                                                                                                                                                                                                                                                                                                                                                                                                                                                                                                                                                                                                                                                                                                                                                                                                                                                                                                                                                                                                                                                                                                                                                                                                                                                                  | Tilia Laboratories s.r.o.                                                                                         | Tilia Laboratories s.r.o.                                                                                                                                                                                                                                                             | Sona Pekova, MD, PhD.                                                                                                                                                                                                                                                       |
| EPI_ISL_906122, EPI_ISL_906126, EPI_ISL_906127, EPI_ISL_906129                                                                                                                                                                                                                                                                                                                                                                                                                                                                                                                                                                                                                                                                                                                                                                                                                                                                                                                                                                                                                                                                                                                                                                                                                                                                                                                                                                                                                                                                                                                                                                                                                                                                                                                                                                                                                                                                                                                                                                                                                                                                                                                  | Institute of Microbiology and Immunology, Faculty of Medicine, University of Ljubljana                            | Institute of Microbiology and Immunology, Faculty of Medicine, University of Ljubljana                                                                                                                                                                                                | Samo Zakotnik, Tomaž Mark Zorec, Matic Brvar, Miša Korva, Mario Poljak, Tatjana Avši - Županc                                                                                                                                                                               |
| EPI_ISL_906264                                                                                                                                                                                                                                                                                                                                                                                                                                                                                                                                                                                                                                                                                                                                                                                                                                                                                                                                                                                                                                                                                                                                                                                                                                                                                                                                                                                                                                                                                                                                                                                                                                                                                                                                                                                                                                                                                                                                                                                                                                                                                                                                                                  | University of Wisconsin-Madison AIDS Vaccine Research Laboratories                                                | University of Wisconsin-Madison AIDS Vaccine Research Laboratories                                                                                                                                                                                                                    | Gage Moreno, Katarina Braun, et al. AIDS Vaccine Research Laboratories                                                                                                                                                                                                      |
| EPI_ISL_906286, EPI_ISL_906287, EPI_ISL_906288, EPI_ISL_906301, EPI_ISL_906302, EPI_ISL_906303                                                                                                                                                                                                                                                                                                                                                                                                                                                                                                                                                                                                                                                                                                                                                                                                                                                                                                                                                                                                                                                                                                                                                                                                                                                                                                                                                                                                                                                                                                                                                                                                                                                                                                                                                                                                                                                                                                                                                                                                                                                                                  | Nigeria Centre for Disease Control (NCDC)                                                                         | African Centre of Excellence for Genomics of Infectious Diseases (ACEGID), Redeemer's University                                                                                                                                                                                      | Oluniyi P.E. et al                                                                                                                                                                                                                                                          |
| EPI_ISL_906562, EPI_ISL_906563, EPI_ISL_906564, EPI_ISL_906565, EPI_ISL_906566, EPI_ISL_906567, EPI_ISL_906568, EPI_ISL_906569, EPI_ISL_906570, EPI_ISL_906571                                                                                                                                                                                                                                                                                                                                                                                                                                                                                                                                                                                                                                                                                                                                                                                                                                                                                                                                                                                                                                                                                                                                                                                                                                                                                                                                                                                                                                                                                                                                                                                                                                                                                                                                                                                                                                                                                                                                                                                                                  | Maine Health and Environmental Testing Laboratory (Maine HETL)                                                    | Tewhey Lab, The Jackson Laboratory                                                                                                                                                                                                                                                    | Matluk,N., Dewey,H., Iosue,F., Barter,M., Lynch,R., Munger,H. and Tewhey,R.                                                                                                                                                                                                 |
| EPI_ISL_906726                                                                                                                                                                                                                                                                                                                                                                                                                                                                                                                                                                                                                                                                                                                                                                                                                                                                                                                                                                                                                                                                                                                                                                                                                                                                                                                                                                                                                                                                                                                                                                                                                                                                                                                                                                                                                                                                                                                                                                                                                                                                                                                                                                  | Hematology Laboratory, Section of Molecular Diagnostics, University Clinical Centre, Medical University of Gdansk | Laboratory of Recombinant Vaccines                                                                                                                                                                                                                                                    | Lukasz Rabalski, Maciej Kosinski, Maciej Grzybek, Adam Sodal, Aneta Szulc, Krzysztof Lewandowski, Ewa Milosz, Marlena Robakowska, Bogusław Szewczyk, Krystyna Bienkowska-Szewczyk                                                                                           |
| EPI_ISL_906849, EPI_ISL_906850, EPI_ISL_906851                                                                                                                                                                                                                                                                                                                                                                                                                                                                                                                                                                                                                                                                                                                                                                                                                                                                                                                                                                                                                                                                                                                                                                                                                                                                                                                                                                                                                                                                                                                                                                                                                                                                                                                                                                                                                                                                                                                                                                                                                                                                                                                                  | Respiratory Viruses Branch, Centers for Disease Control and Prevention                                            | Respiratory Viruses Branch, Centers for Disease Control and Prevention                                                                                                                                                                                                                | Tao,Y., Li,Y., Zhang,J., Queen,K., Uehara,A., Cook,P., Paden,C.R., Wang,H., Tong,S.                                                                                                                                                                                         |
| EPI_ISL_909686                                                                                                                                                                                                                                                                                                                                                                                                                                                                                                                                                                                                                                                                                                                                                                                                                                                                                                                                                                                                                                                                                                                                                                                                                                                                                                                                                                                                                                                                                                                                                                                                                                                                                                                                                                                                                                                                                                                                                                                                                                                                                                                                                                  | GH Cochin-Broca Hôtel Dieu/Lab Virologie                                                                          | National Reference Center for Viruses of Respiratory Infections, Institut Pasteur, Paris                                                                                                                                                                                              | Marion Barbet, Sylvie Behillil, Méline Bizard, Angela Brisebarre, Camille Capel, Etienne Simon-Lorière, Vincent Enouf, Maud Vanpeene, Sylvie van der Werf,L'Honneur Anne-Sophie                                                                                             |
| EPI_ISL_909741, EPI_ISL_909743                                                                                                                                                                                                                                                                                                                                                                                                                                                                                                                                                                                                                                                                                                                                                                                                                                                                                                                                                                                                                                                                                                                                                                                                                                                                                                                                                                                                                                                                                                                                                                                                                                                                                                                                                                                                                                                                                                                                                                                                                                                                                                                                                  | Ohio Department of Health Laboratory                                                                              | Ohio Department of Health Laboratory                                                                                                                                                                                                                                                  | Holmes, Jennifer; Eric Brandt, Keoni Omura, Glen McGillivray, Caitlin McDonnell, Jade Mowery, Stephanie Mccracken, Tyler Payne, Kirtana Ramadugu, Erica Leasure, Brent Lee, Kelsey Florek, Heather Blankenship, Quanta Brown, and Tammy Bannerman                           |
| EPI_ISL_909948                                                                                                                                                                                                                                                                                                                                                                                                                                                                                                                                                                                                                                                                                                                                                                                                                                                                                                                                                                                                                                                                                                                                                                                                                                                                                                                                                                                                                                                                                                                                                                                                                                                                                                                                                                                                                                                                                                                                                                                                                                                                                                                                                                  | CUSL/UCLouvain COVID testing federal platform                                                                     | UCLouvain/IREC/MBLG                                                                                                                                                                                                                                                                   | Jean Ruelle, Lysa Pinsmaye, Benoit Kabamba Mukadi                                                                                                                                                                                                                           |
| EPI_ISL_909964, EPI_ISL_909965, EPI_ISL_909966, EPI_ISL_909967, EPI_ISL_909968, EPI_ISL_909969, EPI_ISL_909970, EPI_ISL_909971, EPI_ISL_909972, EPI_ISL_909973, EPI_ISL_909974, EPI_ISL_909975, EPI_ISL_909977, EPI_ISL_909979, EPI_ISL_909980, EPI_ISL_909981, EPI_ISL_909982, EPI_ISL_909983, EPI_ISL_909984, EPI_ISL_909985, EPI_ISL_909986, EPI_ISL_909987, EPI_ISL_909988, EPI_ISL_909989, EPI_ISL_909990, EPI_ISL_909991, EPI_ISL_909992, EPI_ISL_909993, EPI_ISL_909994, EPI_ISL_909995, EPI_ISL_909996, EPI_ISL_909997, EPI_ISL_909998, EPI_ISL_909999, EPI_ISL_910000, EPI_ISL_910001, EPI_ISL_910002, EPI_ISL_910003, EPI_ISL_910004, EPI_ISL_910005, EPI_ISL_910006, EPI_ISL_910007, EPI_ISL_910008, EPI_ISL_910009, EPI_ISL_910010                                                                                                                                                                                                                                                                                                                                                                                                                                                                                                                                                                                                                                                                                                                                                                                                                                                                                                                                                                                                                                                                                                                                                                                                                                                                                                                                                                                                                                  |                                                                                                                   |                                                                                                                                                                                                                                                                                       |                                                                                                                                                                                                                                                                             |
| see above                                                                                                                                                                                                                                                                                                                                                                                                                                                                                                                                                                                                                                                                                                                                                                                                                                                                                                                                                                                                                                                                                                                                                                                                                                                                                                                                                                                                                                                                                                                                                                                                                                                                                                                                                                                                                                                                                                                                                                                                                                                                                                                                                                       | A. Krumbholz, Labor Dr. Krause und Kollegen MVZ GmbH, Kiel                                                        | Charité Universitätsmedizin Berlin, Institut für Virologie                                                                                                                                                                                                                            | Victor M Corman, Tobias Bleicker, Julia Tesch, Barbara Mühlemann, Jörn Beheim-Schwarzbach, Talitha Veith, Julia Schneider, Cornelia Schlee, Tomasz Zemojtel, Terry Jones, Christian Drosten                                                                                 |
| EPI_ISL_910222                                                                                                                                                                                                                                                                                                                                                                                                                                                                                                                                                                                                                                                                                                                                                                                                                                                                                                                                                                                                                                                                                                                                                                                                                                                                                                                                                                                                                                                                                                                                                                                                                                                                                                                                                                                                                                                                                                                                                                                                                                                                                                                                                                  | Viollier AG                                                                                                       | University Hospital Basel, Clinical Bacteriology                                                                                                                                                                                                                                      | Tim Roloff, Madlen Stange, Helena MB Seth-Smith, Alfredo Mari, Karoline Leuzinger, Julia Bielicki, Christiane Beckmann, Manuel Battegay, Hans Hirsch, Adrian Egli                                                                                                           |
| EPI_ISL_910331, EPI_ISL_910332                                                                                                                                                                                                                                                                                                                                                                                                                                                                                                                                                                                                                                                                                                                                                                                                                                                                                                                                                                                                                                                                                                                                                                                                                                                                                                                                                                                                                                                                                                                                                                                                                                                                                                                                                                                                                                                                                                                                                                                                                                                                                                                                                  | Department of Infectious Diseases, Istituto Superiore di Sanità, Rome, Italy; AOUP Paolo Giaccone, Palermo, Italy | Istituto Superiore di Sanità (ISS)                                                                                                                                                                                                                                                    | Paola Stefanelli, Angela Di Martino, Alessandra Lo Presti, Stefano Fiore, Fabio Tramuto, Francesco Vitale, Carmelo Maida, Daniela Di Naro, Giulia Randazzo, Manuela Marra, Maria Carollo, Marco Crescenzi                                                                   |
| EPI_ISL_910336                                                                                                                                                                                                                                                                                                                                                                                                                                                                                                                                                                                                                                                                                                                                                                                                                                                                                                                                                                                                                                                                                                                                                                                                                                                                                                                                                                                                                                                                                                                                                                                                                                                                                                                                                                                                                                                                                                                                                                                                                                                                                                                                                                  | Laboratory for Respiratory Viruses, Cantacuzino National Military-Medical Institute for Research and Development  | Cantacuzino Institute Virology                                                                                                                                                                                                                                                        | Luiza Ustea, Nicoleta Paraschiv, Mihaela Lazar                                                                                                                                                                                                                              |
| EPI_ISL_910347, EPI_ISL_910348, EPI_ISL_910349, EPI_ISL_910350, EPI_ISL_910351, EPI_ISL_910352, EPI_ISL_910353, EPI_ISL_910354, EPI_ISL_910355, EPI_ISL_910356, EPI_ISL_910357, EPI_ISL_910358, EPI_ISL_910359, EPI_ISL_910361, EPI_ISL_910362, EPI_ISL_910363, EPI_ISL_910364, EPI_ISL_910366, EPI_ISL_910367, EPI_ISL_910368, EPI_ISL_910369, EPI_ISL_910370, EPI_ISL_910372, EPI_ISL_910373, EPI_ISL_910374, EPI_ISL_910375, EPI_ISL_910377, EPI_ISL_910378, EPI_ISL_910379, EPI_ISL_910380, EPI_ISL_910382, EPI_ISL_910384, EPI_ISL_910385, EPI_ISL_910390, EPI_ISL_910392, EPI_ISL_910393, EPI_ISL_910394, EPI_ISL_910396, EPI_ISL_910397, EPI_ISL_910398, EPI_ISL_910399, EPI_ISL_910400, EPI_ISL_910401, EPI_ISL_910403, EPI_ISL_910404, EPI_ISL_910405, EPI_ISL_910406, EPI_ISL_910407, EPI_ISL_910408, EPI_ISL_910410, EPI_ISL_910411, EPI_ISL_910412, EPI_ISL_910413, EPI_ISL_910414, EPI_ISL_910415, EPI_ISL_910416, EPI_ISL_910417, EPI_ISL_910420, EPI_ISL_910422, EPI_ISL_910423, EPI_ISL_910424, EPI_ISL_910425, EPI_ISL_910427, EPI_ISL_910429, EPI_ISL_910430, EPI_ISL_910431, EPI_ISL_910432, EPI_ISL_910433, EPI_ISL_910434, EPI_ISL_910435, EPI_ISL_910437, EPI_ISL_910438, EPI_ISL_910439, EPI_ISL_910440, EPI_ISL_910442, EPI_ISL_910443, EPI_ISL_910444, EPI_ISL_910445, EPI_ISL_910446, EPI_ISL_910447, EPI_ISL_910448, EPI_ISL_910449, EPI_ISL_910471, EPI_ISL_910472, EPI_ISL_910473, EPI_ISL_910474, EPI_ISL_910475, EPI_ISL_910476, EPI_ISL_910477, EPI_ISL_910478, EPI_ISL_910479, EPI_ISL_910480, EPI_ISL_910481, EPI_ISL_910482, EPI_ISL_910483, EPI_ISL_910484, EPI_ISL_910485, EPI_ISL_910486, EPI_ISL_910487, EPI_ISL_910488, EPI_ISL_910489, EPI_ISL_910490, EPI_ISL_910491, EPI_ISL_910492, EPI_ISL_910494, EPI_ISL_910495, EPI_ISL_910500, EPI_ISL_910501, EPI_ISL_910503, EPI_ISL_910504, EPI_ISL_910506, EPI_ISL_910507, EPI_ISL_910508, EPI_ISL_910509, EPI_ISL_910510, EPI_ISL_910513, EPI_ISL_910515, EPI_ISL_910517, EPI_ISL_910518, EPI_ISL_910519, EPI_ISL_910523, EPI_ISL_910525, EPI_ISL_910528, EPI_ISL_910531, EPI_ISL_910532, EPI_ISL_910538, EPI_ISL_910543, EPI_ISL_910547, EPI_ISL_910548, EPI_ISL_910549, EPI_ISL_910552, |                                                                                                                   |                                                                                                                                                                                                                                                                                       |                                                                                                                                                                                                                                                                             |





[illegible]

|                                                                                                                                                                                                                                                                                                                                                                                                                                                                                                                                                                                                                                                                                                                                                                                                                                                                                                                |           |                                                                                                        |                                                                                                           |                                                                                                                                                                                                                                                                                                                                        |
|----------------------------------------------------------------------------------------------------------------------------------------------------------------------------------------------------------------------------------------------------------------------------------------------------------------------------------------------------------------------------------------------------------------------------------------------------------------------------------------------------------------------------------------------------------------------------------------------------------------------------------------------------------------------------------------------------------------------------------------------------------------------------------------------------------------------------------------------------------------------------------------------------------------|-----------|--------------------------------------------------------------------------------------------------------|-----------------------------------------------------------------------------------------------------------|----------------------------------------------------------------------------------------------------------------------------------------------------------------------------------------------------------------------------------------------------------------------------------------------------------------------------------------|
| EPI_ISL_913942, EPI_ISL_913943, EPI_ISL_913948, EPI_ISL_913949, EPI_ISL_913950, EPI_ISL_913951, EPI_ISL_913952, EPI_ISL_913953, EPI_ISL_913954, EPI_ISL_913955, EPI_ISL_913960, EPI_ISL_913962, EPI_ISL_913965, EPI_ISL_913979, EPI_ISL_913980                                                                                                                                                                                                                                                                                                                                                                                                                                                                                                                                                                                                                                                                 | see above | Instituto de Diagnostico y Referencia Epidemiologicos<br>INDRE_RNLSP                                   | Instituto de Diagnostico y Referencia Epidemiologicos<br>(INDRE)                                          | Claudia Wong-Arambula, Abril Rodríguez-Maldonado, Fabiola Garces-Ayala, Adnan Araiza-Rodríguez, David Fragoso-Fonseca, Sergio Rangel-Guerrero, Mayra Jimenez-Morales, Nancy Munoz-Hernandez, Natividad Cruz-Ortiz, Tatiana Nunez-Garcia, Gisela Barrera-Badillo, Lucia Hernandez-Rivas, Irma Lopez-Martinez, Ernesto Ramirez-Gonzalez. |
| EPI_ISL_914647, EPI_ISL_914648, EPI_ISL_914649, EPI_ISL_914650, EPI_ISL_914651, EPI_ISL_914652, EPI_ISL_914653, EPI_ISL_914654, EPI_ISL_914655, EPI_ISL_914656, EPI_ISL_914657, EPI_ISL_914658, EPI_ISL_914659, EPI_ISL_914660, EPI_ISL_914661, EPI_ISL_914662, EPI_ISL_914663, EPI_ISL_914664, EPI_ISL_914665, EPI_ISL_914666, EPI_ISL_914667, EPI_ISL_914668, EPI_ISL_914669, EPI_ISL_914670, EPI_ISL_914671, EPI_ISL_914672, EPI_ISL_914673, EPI_ISL_914674, EPI_ISL_914675, EPI_ISL_914676, EPI_ISL_914677, EPI_ISL_914678, EPI_ISL_914679, EPI_ISL_914680, EPI_ISL_914681, EPI_ISL_914682, EPI_ISL_914683, EPI_ISL_914684, EPI_ISL_914685, EPI_ISL_914686, EPI_ISL_914687, EPI_ISL_914688, EPI_ISL_914689, EPI_ISL_914690, EPI_ISL_914691, EPI_ISL_914692, EPI_ISL_914693, EPI_ISL_914694, EPI_ISL_914695, EPI_ISL_914696, EPI_ISL_914697, EPI_ISL_914698, EPI_ISL_914699, EPI_ISL_914700, EPI_ISL_914701 | see above | Utah Public Health Laboratory                                                                          | Utah Public Health Laboratory                                                                             | Erin L. Young, Kelly F. Oakeson, Tara Gallagher                                                                                                                                                                                                                                                                                        |
| EPI_ISL_914794                                                                                                                                                                                                                                                                                                                                                                                                                                                                                                                                                                                                                                                                                                                                                                                                                                                                                                 |           | AREA DE SALUD BUENOS AIRES                                                                             | Incienza, Instituto Costarricense de Investigación y Enseñanza en Nutrición y Salud                       | Francisco Duarte, Hebleen Porras, Claudio Soto-Garita, Estela Cordero, Adriana Godínez, Melany Calderón & Mariel López                                                                                                                                                                                                                 |
| EPI_ISL_914795                                                                                                                                                                                                                                                                                                                                                                                                                                                                                                                                                                                                                                                                                                                                                                                                                                                                                                 |           | HOSPITAL DR. FERNANDO ESCALANTE PRADILLA                                                               | Incienza, Instituto Costarricense de Investigación y Enseñanza en Nutrición y Salud                       | Francisco Duarte, Hebleen Porras, Claudio Soto-Garita, Estela Cordero, Adriana Godínez, Melany Calderón & Mariel López                                                                                                                                                                                                                 |
| EPI_ISL_914796, EPI_ISL_914797                                                                                                                                                                                                                                                                                                                                                                                                                                                                                                                                                                                                                                                                                                                                                                                                                                                                                 |           | TAMIAJE COMUNITARIO - PASO CANOAS                                                                      | Incienza, Instituto Costarricense de Investigación y Enseñanza en Nutrición y Salud                       | Francisco Duarte, Hebleen Porras, Claudio Soto-Garita, Estela Cordero, Adriana Godínez, Melany Calderón & Mariel López                                                                                                                                                                                                                 |
| EPI_ISL_914798                                                                                                                                                                                                                                                                                                                                                                                                                                                                                                                                                                                                                                                                                                                                                                                                                                                                                                 |           | AREA DE SALUD CARTAGO                                                                                  | Incienza, Instituto Costarricense de Investigación y Enseñanza en Nutrición y Salud                       | Francisco Duarte, Hebleen Porras, Claudio Soto-Garita, Estela Cordero, Adriana Godínez, Melany Calderón & Mariel López                                                                                                                                                                                                                 |
| EPI_ISL_914799, EPI_ISL_914800                                                                                                                                                                                                                                                                                                                                                                                                                                                                                                                                                                                                                                                                                                                                                                                                                                                                                 |           | AREA DE SALUD SAN FRANCISCO-SAN ANTONIO (COOPESANA)                                                    | Incienza, Instituto Costarricense de Investigación y Enseñanza en Nutrición y Salud                       | Francisco Duarte, Hebleen Porras, Claudio Soto-Garita, Estela Cordero, Adriana Godínez, Melany Calderón & Mariel López                                                                                                                                                                                                                 |
| EPI_ISL_914802                                                                                                                                                                                                                                                                                                                                                                                                                                                                                                                                                                                                                                                                                                                                                                                                                                                                                                 |           | AREA DE SALUD CATEDRAL NORESTE                                                                         | Incienza, Instituto Costarricense de Investigación y Enseñanza en Nutrición y Salud                       | Francisco Duarte, Hebleen Porras, Claudio Soto-Garita, Estela Cordero, Adriana Godínez, Melany Calderón & Mariel López                                                                                                                                                                                                                 |
| EPI_ISL_914803                                                                                                                                                                                                                                                                                                                                                                                                                                                                                                                                                                                                                                                                                                                                                                                                                                                                                                 |           | AREA DE SALUD LA UNION                                                                                 | Incienza, Instituto Costarricense de Investigación y Enseñanza en Nutrición y Salud                       | Francisco Duarte, Hebleen Porras, Claudio Soto-Garita, Estela Cordero, Adriana Godínez, Melany Calderón & Mónica Charpentier-Artavia                                                                                                                                                                                                   |
| EPI_ISL_914804                                                                                                                                                                                                                                                                                                                                                                                                                                                                                                                                                                                                                                                                                                                                                                                                                                                                                                 |           | AREA DE SALUD TURRIALBA-JIMENEZ                                                                        | Incienza, Instituto Costarricense de Investigación y Enseñanza en Nutrición y Salud                       | Francisco Duarte, Hebleen Porras, Claudio Soto-Garita, Estela Cordero, Adriana Godínez, Melany Calderón & Mónica Charpentier-Artavia                                                                                                                                                                                                   |
| EPI_ISL_914805                                                                                                                                                                                                                                                                                                                                                                                                                                                                                                                                                                                                                                                                                                                                                                                                                                                                                                 |           | AREA DE SALUD CARTAGO                                                                                  | Incienza, Instituto Costarricense de Investigación y Enseñanza en Nutrición y Salud                       | Francisco Duarte, Hebleen Porras, Claudio Soto-Garita, Estela Cordero, Adriana Godínez, Melany Calderón & Mónica Charpentier-Artavia                                                                                                                                                                                                   |
| EPI_ISL_914806                                                                                                                                                                                                                                                                                                                                                                                                                                                                                                                                                                                                                                                                                                                                                                                                                                                                                                 |           | AREA DE SALUD CORONADO                                                                                 | Incienza, Instituto Costarricense de Investigación y Enseñanza en Nutrición y Salud                       | Francisco Duarte, Hebleen Porras, Claudio Soto-Garita, Estela Cordero, Adriana Godínez & Melany Calderón                                                                                                                                                                                                                               |
| EPI_ISL_914807                                                                                                                                                                                                                                                                                                                                                                                                                                                                                                                                                                                                                                                                                                                                                                                                                                                                                                 |           | HLE - ASOCIACION HOGAR DE ANCIANOS SANTIAGO CRESPO CALVO                                               | Incienza, Instituto Costarricense de Investigación y Enseñanza en Nutrición y Salud                       | Francisco Duarte, Hebleen Porras, Claudio Soto-Garita, Estela Cordero, Adriana Godínez, Melany Calderón & Mariel López                                                                                                                                                                                                                 |
| EPI_ISL_914808                                                                                                                                                                                                                                                                                                                                                                                                                                                                                                                                                                                                                                                                                                                                                                                                                                                                                                 |           | HLE - ASOCIACION HOGAR PARA ANCIANOS PRESBITERO JAFET JIMENEZ MORALES DE GRECIA                        | Incienza, Instituto Costarricense de Investigación y Enseñanza en Nutrición y Salud                       | Francisco Duarte, Hebleen Porras, Claudio Soto-Garita, Estela Cordero, Adriana Godínez, Melany Calderón & Mariel López                                                                                                                                                                                                                 |
| EPI_ISL_914809                                                                                                                                                                                                                                                                                                                                                                                                                                                                                                                                                                                                                                                                                                                                                                                                                                                                                                 |           | AREA DE SALUD OREAMUNO-PACAYAS-TIERRA BLANCA                                                           | Incienza, Instituto Costarricense de Investigación y Enseñanza en Nutrición y Salud                       | Francisco Duarte, Hebleen Porras, Claudio Soto-Garita, Estela Cordero, Adriana Godínez, Melany Calderón & Mariel López                                                                                                                                                                                                                 |
| EPI_ISL_914810                                                                                                                                                                                                                                                                                                                                                                                                                                                                                                                                                                                                                                                                                                                                                                                                                                                                                                 |           | AREA DE SALUD SAN JUAN-SAN DIEGO-CONCEPCION 2                                                          | Incienza, Instituto Costarricense de Investigación y Enseñanza en Nutrición y Salud                       | Francisco Duarte, Hebleen Porras, Claudio Soto-Garita, Estela Cordero, Adriana Godínez, Melany Calderón & Mariel López                                                                                                                                                                                                                 |
| EPI_ISL_914811, EPI_ISL_914812                                                                                                                                                                                                                                                                                                                                                                                                                                                                                                                                                                                                                                                                                                                                                                                                                                                                                 |           | AREA DE SALUD GOICOECHEA 2 - CLINICA DR. JIMENEZ NUNEZ                                                 | Incienza, Instituto Costarricense de Investigación y Enseñanza en Nutrición y Salud                       | Francisco Duarte, Hebleen Porras, Claudio Soto-Garita, Estela Cordero, Adriana Godínez, Melany Calderón & Mariel López                                                                                                                                                                                                                 |
| EPI_ISL_914813                                                                                                                                                                                                                                                                                                                                                                                                                                                                                                                                                                                                                                                                                                                                                                                                                                                                                                 |           | TAMIAJE COMUNITARIO - PASO CANOAS                                                                      | Incienza, Instituto Costarricense de Investigación y Enseñanza en Nutrición y Salud                       | Francisco Duarte, Hebleen Porras, Claudio Soto-Garita, Estela Cordero, Adriana Godínez, Melany Calderón & Mariel López                                                                                                                                                                                                                 |
| EPI_ISL_914814                                                                                                                                                                                                                                                                                                                                                                                                                                                                                                                                                                                                                                                                                                                                                                                                                                                                                                 |           | HOSPITAL METROPOLITANO                                                                                 | Incienza, Instituto Costarricense de Investigación y Enseñanza en Nutrición y Salud                       | Francisco Duarte, Hebleen Porras, Claudio Soto-Garita, Estela Cordero, Adriana Godínez, Melany Calderón & Margarita Lee-Lui                                                                                                                                                                                                            |
| EPI_ISL_914817, EPI_ISL_914819                                                                                                                                                                                                                                                                                                                                                                                                                                                                                                                                                                                                                                                                                                                                                                                                                                                                                 |           | HOSPITAL DE NIÑOS DR. CARLOS SAENZ HERRERA                                                             | Incienza, Instituto Costarricense de Investigación y Enseñanza en Nutrición y Salud                       | Francisco Duarte, Hebleen Porras, Claudio Soto-Garita, Estela Cordero, Adriana Godínez, Melany Calderón & Cristian Pérez-Corrales                                                                                                                                                                                                      |
| EPI_ISL_914821, EPI_ISL_914822                                                                                                                                                                                                                                                                                                                                                                                                                                                                                                                                                                                                                                                                                                                                                                                                                                                                                 |           | HOSPITAL DR. ENRIQUE BALTODANO BRICEÑO                                                                 | Incienza, Instituto Costarricense de Investigación y Enseñanza en Nutrición y Salud                       | Francisco Duarte, Hebleen Porras, Claudio Soto-Garita, Estela Cordero, Adriana Godínez, Melany Calderón & Mariel López                                                                                                                                                                                                                 |
| EPI_ISL_915358, EPI_ISL_915359, EPI_ISL_915363, EPI_ISL_915379, EPI_ISL_915381, EPI_ISL_915382, EPI_ISL_915383, EPI_ISL_915384, EPI_ISL_915416, EPI_ISL_915417, EPI_ISL_915419, EPI_ISL_915420                                                                                                                                                                                                                                                                                                                                                                                                                                                                                                                                                                                                                                                                                                                 | see above | Keio University School of Medicine                                                                     | Keio University School of Medicine                                                                        | Kenjiro Kosaki, Yuka Iwasaki, Hirotsugu Ishizu, Haruhiko Siomi, Kodai Abe                                                                                                                                                                                                                                                              |
| EPI_ISL_918167, EPI_ISL_918170, EPI_ISL_918171, EPI_ISL_918172, EPI_ISL_918173                                                                                                                                                                                                                                                                                                                                                                                                                                                                                                                                                                                                                                                                                                                                                                                                                                 |           | Department of Infectious Diseases and Immunology, National Hospital Organization Nagoya Medical Center | Clinical Research Center, National Hospital Organization Nagoya Medical Center                            | Yoshihiro Nakata, Hirotaka Ode, Mai Kubota, Masakazu Matsuda, Kazuhiro Matsuoka, Miho Nakasuji, Mikiko Mori, Mayumi Imahashi, Yoshiyuki Yokomaku, Yasumasa Iwatani                                                                                                                                                                     |
| EPI_ISL_918208, EPI_ISL_918233, EPI_ISL_918240, EPI_ISL_918248                                                                                                                                                                                                                                                                                                                                                                                                                                                                                                                                                                                                                                                                                                                                                                                                                                                 |           | Innovative Genomics Institute, UC Berkeley                                                             | Innovative Genomics Institute, UC Berkeley                                                                | Stacia Wyman, Haridha Shivram, Phil Frankino, Liana Lareau, Shana McDevitt, Justin Choi                                                                                                                                                                                                                                                |
| EPI_ISL_918344, EPI_ISL_918345, EPI_ISL_918346, EPI_ISL_918357                                                                                                                                                                                                                                                                                                                                                                                                                                                                                                                                                                                                                                                                                                                                                                                                                                                 |           | Institute of Virology, Medical Center, University of Freiburg, Freiburg, Germany                       | Institute of Virology, Clinical Virus Genomics, Medical Center, University of Freiburg, Freiburg, Germany | Jonas Fuchs, Lisa Kern, Sandra Reuter, Hajo Grundmann, Marcus Panning                                                                                                                                                                                                                                                                  |
| EPI_ISL_918359, EPI_ISL_918360, EPI_ISL_918361, EPI_ISL_918362, EPI_ISL_918363, EPI_ISL_918364, EPI_ISL_918365                                                                                                                                                                                                                                                                                                                                                                                                                                                                                                                                                                                                                                                                                                                                                                                                 |           | Virology Unit, Institut Pasteur du Cambodge                                                            | Virology Unit, Institut Pasteur du Cambodge                                                               | Sokhoun Yann, Ly Sovann, Kraing Sidonn, Yi Sengdoeurn, Chin Savuth, Chau Darapheak, Etienne Simon-Loriere, Veasna Duong, Erik A Karlsson                                                                                                                                                                                               |
| EPI_ISL_918408, EPI_ISL_918409                                                                                                                                                                                                                                                                                                                                                                                                                                                                                                                                                                                                                                                                                                                                                                                                                                                                                 |           | Ospedale Santa Caterina Novella                                                                        | Istituto Zooprofilattico Sperimentale della Puglia e della Basilicata                                     | Parisi A., Bianco A., Capozzi L., Del Sambro L., Simone D., Manzulli V, Rondinone V., Pace L., Cipolletta D., Galante D.                                                                                                                                                                                                               |
| EPI_ISL_918485, EPI_ISL_918494, EPI_ISL_918498                                                                                                                                                                                                                                                                                                                                                                                                                                                                                                                                                                                                                                                                                                                                                                                                                                                                 |           | Ohio Department of Health Laboratory                                                                   | Ohio Department of Health Laboratory                                                                      | Holmes, Jennifer; Eric Brandt, Keoni Omura, Glen McGillivray, Caitlin McDonnell, Jade Mowery, Stephanie Mccracken, Tyler Payne, Kirtana Ramadugu, Erica Leasure, Brent Lee, Kelsey Florek, Heather Blankenship, Quanta Brown, and Tammy Bannerman                                                                                      |
| EPI_ISL_918499, EPI_ISL_918504, EPI_ISL_918512                                                                                                                                                                                                                                                                                                                                                                                                                                                                                                                                                                                                                                                                                                                                                                                                                                                                 |           | LACEN - Laboratório Central de Saúde Pública do Amazonas                                               | Evandro Chagas Institute                                                                                  | Santos, M.C.; Silva, A.M.; Junior, W.D.C.; Barbagelata, L.S.; Ferreira, J.A.; Sousa, E.M.A.; da Silva, P.S.; Pinheiro, K.C.; L.C.; Sousa Junior, E.C.                                                                                                                                                                                  |
| EPI_ISL_918518, EPI_ISL_918519, EPI_ISL_918520, EPI_ISL_918521                                                                                                                                                                                                                                                                                                                                                                                                                                                                                                                                                                                                                                                                                                                                                                                                                                                 |           | Evandro Chagas Institute                                                                               | Evandro Chagas Institute                                                                                  | Santos, M.C.; Silva, A.M.; Junior, W.D.C.; Barbagelata, L.S.; Ferreira, J.A.; Sousa, E.M.A.; da Silva, P.S.; Pinheiro, K.C.; L.C.; Sousa Junior, E.C.                                                                                                                                                                                  |
| EPI_ISL_918522, EPI_ISL_918524, EPI_ISL_918525, EPI_ISL_918526, EPI_ISL_918527, EPI_ISL_918528,                                                                                                                                                                                                                                                                                                                                                                                                                                                                                                                                                                                                                                                                                                                                                                                                                |           | LACEN - Laboratório Central de Saúde Pública do Para                                                   | Evandro Chagas Institute                                                                                  | Santos, M.C.; Silva, A.M.; Junior, W.D.C.; Barbagelata, L.S.; Ferreira, J.A.; Sousa, E.M.A.; da Silva, P.S.; Pinheiro, K.C.; L.C.; Sousa Junior, E.C.                                                                                                                                                                                  |

|                                                                                                                                                                                                                                                                                                                                                                                                                                                                                                                                                                                                                                                                                                                                                                                                                                                                                                                                                |                                                                                                                                                                                                 |                                          |                                                                                                                                                                                                                                                                                                                                                                                                                                         |
|------------------------------------------------------------------------------------------------------------------------------------------------------------------------------------------------------------------------------------------------------------------------------------------------------------------------------------------------------------------------------------------------------------------------------------------------------------------------------------------------------------------------------------------------------------------------------------------------------------------------------------------------------------------------------------------------------------------------------------------------------------------------------------------------------------------------------------------------------------------------------------------------------------------------------------------------|-------------------------------------------------------------------------------------------------------------------------------------------------------------------------------------------------|------------------------------------------|-----------------------------------------------------------------------------------------------------------------------------------------------------------------------------------------------------------------------------------------------------------------------------------------------------------------------------------------------------------------------------------------------------------------------------------------|
| EPI_ISL_918529, EPI_ISL_918530                                                                                                                                                                                                                                                                                                                                                                                                                                                                                                                                                                                                                                                                                                                                                                                                                                                                                                                 |                                                                                                                                                                                                 |                                          |                                                                                                                                                                                                                                                                                                                                                                                                                                         |
| EPI_ISL_918534                                                                                                                                                                                                                                                                                                                                                                                                                                                                                                                                                                                                                                                                                                                                                                                                                                                                                                                                 | LACEN - Laboratório Central de Saúde Pública do Amazonas                                                                                                                                        | Evandro Chagas Institute                 | Santos, M.C.; Silva, A.M.; Junior, W.D.C.; Barbagelata, L.S.; Ferreira, J.A.; Sousa, E.M.A.; da Silva, P.S.; Pinheiro, K.C.; L.C.; Sousa Junior, E.C.                                                                                                                                                                                                                                                                                   |
| EPI_ISL_918540                                                                                                                                                                                                                                                                                                                                                                                                                                                                                                                                                                                                                                                                                                                                                                                                                                                                                                                                 | LACEN - Laboratório Central de Saúde Pública do Ceara                                                                                                                                           | Evandro Chagas Institute                 | Santos, M.C.; Silva, A.M.; Junior, W.D.C.; Barbagelata, L.S.; Ferreira, J.A.; Sousa, E.M.A.; da Silva, P.S.; Pinheiro, K.C.; L.C.; Sousa Junior, E.C.                                                                                                                                                                                                                                                                                   |
| EPI_ISL_918551                                                                                                                                                                                                                                                                                                                                                                                                                                                                                                                                                                                                                                                                                                                                                                                                                                                                                                                                 | LACEN - Laboratório Central de Saúde Pública do Amapa                                                                                                                                           | Evandro Chagas Institute                 | Santos, M.C.; Silva, A.M.; Junior, W.D.C.; Barbagelata, L.S.; Ferreira, J.A.; Sousa, E.M.A.; da Silva, P.S.; Pinheiro, K.C.; L.C.; Sousa Junior, E.C.                                                                                                                                                                                                                                                                                   |
| EPI_ISL_918552                                                                                                                                                                                                                                                                                                                                                                                                                                                                                                                                                                                                                                                                                                                                                                                                                                                                                                                                 | LACEN - Laboratório Central de Saúde Pública do Para                                                                                                                                            | Evandro Chagas Institute                 | Santos, M.C.; Silva, A.M.; Junior, W.D.C.; Barbagelata, L.S.; Ferreira, J.A.; Sousa, E.M.A.; da Silva, P.S.; Pinheiro, K.C.; L.C.; Sousa Junior, E.C.                                                                                                                                                                                                                                                                                   |
| EPI_ISL_918553, EPI_ISL_918554, EPI_ISL_918555, EPI_ISL_918556                                                                                                                                                                                                                                                                                                                                                                                                                                                                                                                                                                                                                                                                                                                                                                                                                                                                                 | LACEN - Laboratório Central de Saúde Pública do Amapa                                                                                                                                           | Evandro Chagas Institute                 | Santos, M.C.; Silva, A.M.; Junior, W.D.C.; Barbagelata, L.S.; Ferreira, J.A.; Sousa, E.M.A.; da Silva, P.S.; Pinheiro, K.C.; L.C.; Sousa Junior, E.C.                                                                                                                                                                                                                                                                                   |
| EPI_ISL_918562                                                                                                                                                                                                                                                                                                                                                                                                                                                                                                                                                                                                                                                                                                                                                                                                                                                                                                                                 | Ohio Department of Health Laboratory                                                                                                                                                            | Ohio Department of Health Laboratory     | Holmes, Jennifer; Eric Brandt, Keoni Omura, Glen McGillivray, Caitlin McDonnell, Jade Mowery, Stephanie Mccracken, Tyler Payne, Kirtana Ramadugu, Erica Leasure, Brent Lee, Kelsey Florek, Heather Blankenship, Quanta Brown, and Tammy Bannerman                                                                                                                                                                                       |
| EPI_ISL_918600, EPI_ISL_918608, EPI_ISL_918612, EPI_ISL_918614, EPI_ISL_918644, EPI_ISL_918748, EPI_ISL_918750, EPI_ISL_918753, EPI_ISL_918755, EPI_ISL_918759, EPI_ISL_918761, EPI_ISL_918762, EPI_ISL_918829, EPI_ISL_918834, EPI_ISL_918840, EPI_ISL_918841, EPI_ISL_918846, EPI_ISL_918853, EPI_ISL_918854, EPI_ISL_918858, EPI_ISL_918940, EPI_ISL_918942, EPI_ISL_918945, EPI_ISL_918946, EPI_ISL_918949, EPI_ISL_918950, EPI_ISL_918954, EPI_ISL_918956, EPI_ISL_918957, EPI_ISL_918961                                                                                                                                                                                                                                                                                                                                                                                                                                                 | University of Birmingham                                                                                                                                                                        | COVID-19 Genomics UK (COG-UK) Consortium | Institute of Microbiology, University of Birmingham: Claire McMurray, Joanne Stockton, Samuel Nicholls, Radoslaw Poplawski, Will Rowe, Josh Quick, Nicholas Loman. University of Birmingham Testing Laboratory: Celina M Whalley, Andrew Bosworth, Charlotte Poxon, Kasun Wanigasooriya, Oliver Pickles, Mike Kidd, Alex Richter, Andrew D Beggs PHE Heartlands Lab: Husam Osman, Andrew Bosworth. Queen Elizabeth Hospital: Anna Casey |
| see above                                                                                                                                                                                                                                                                                                                                                                                                                                                                                                                                                                                                                                                                                                                                                                                                                                                                                                                                      |                                                                                                                                                                                                 |                                          |                                                                                                                                                                                                                                                                                                                                                                                                                                         |
| EPI_ISL_919237, EPI_ISL_919244, EPI_ISL_919251, EPI_ISL_919256, EPI_ISL_919257, EPI_ISL_919258, EPI_ISL_919266, EPI_ISL_919269                                                                                                                                                                                                                                                                                                                                                                                                                                                                                                                                                                                                                                                                                                                                                                                                                 | West of Scotland Specialist Virology Centre, NHSGGC / MRC-University of Glasgow Centre for Virus Research                                                                                       | COVID-19 Genomics UK (COG-UK) Consortium | Ana da Silva Filipe, Natasha Johnson, Kathy Smollett, Daniel Mair, Stephen Carmichael, Alice Broos, Lily Tong, Jenna Nichols, Kyriaki Nomikou; Sarah McDonald; Richard Orton, Joseph Hughes, Sreenu Vattipally, David L Robertson; Alasdair MacLean, Rory Gunson; Sharif Shaaban, Matthew Holden; Rachel Blacow, Guy Mollett, Kathy Li, James Shepherd, Antonia Ho, Emma Thomson                                                        |
| EPI_ISL_919310, EPI_ISL_919311, EPI_ISL_919312, EPI_ISL_919314, EPI_ISL_919316, EPI_ISL_919318, EPI_ISL_919320, EPI_ISL_919321, EPI_ISL_919322, EPI_ISL_919323, EPI_ISL_919325, EPI_ISL_919328, EPI_ISL_919330, EPI_ISL_919334, EPI_ISL_919335, EPI_ISL_919343, EPI_ISL_919349, EPI_ISL_919352, EPI_ISL_919353, EPI_ISL_919354, EPI_ISL_919355, EPI_ISL_919356, EPI_ISL_919357, EPI_ISL_919358, EPI_ISL_919359, EPI_ISL_919360, EPI_ISL_919361, EPI_ISL_919363, EPI_ISL_919365, EPI_ISL_919366, EPI_ISL_919368, EPI_ISL_919369, EPI_ISL_919370, EPI_ISL_919371, EPI_ISL_919372, EPI_ISL_919373, EPI_ISL_919374, EPI_ISL_919375, EPI_ISL_919376, EPI_ISL_919377, EPI_ISL_919378, EPI_ISL_919379, EPI_ISL_919381, EPI_ISL_919382, EPI_ISL_919383, EPI_ISL_919384, EPI_ISL_919388, EPI_ISL_919390, EPI_ISL_919391, EPI_ISL_919392, EPI_ISL_919395, EPI_ISL_919397, EPI_ISL_919398, EPI_ISL_919399, EPI_ISL_919400, EPI_ISL_919403                 | Virology Department, Royal Infirmary of Edinburgh, NHS Lothian / School of Biological Sciences, University of Edinburgh / Institute of Genetics and Molecular Medicine, University of Edinburgh | COVID-19 Genomics UK (COG-UK) Consortium | McHugh M, Dewar R, Rooke S, Gallagher M, Balcaza C, O'Toole Á, Scher E, Hill V, McCrone JT, Colquhoun R, Yu X, Jackson B, Rambaut A, Williams TC, Templeton K                                                                                                                                                                                                                                                                           |
| see above                                                                                                                                                                                                                                                                                                                                                                                                                                                                                                                                                                                                                                                                                                                                                                                                                                                                                                                                      |                                                                                                                                                                                                 |                                          |                                                                                                                                                                                                                                                                                                                                                                                                                                         |
| EPI_ISL_920178, EPI_ISL_920189, EPI_ISL_920220, EPI_ISL_920223, EPI_ISL_920243, EPI_ISL_920256, EPI_ISL_920257, EPI_ISL_920267, EPI_ISL_920269, EPI_ISL_920277, EPI_ISL_920280, EPI_ISL_920281, EPI_ISL_920282, EPI_ISL_920290, EPI_ISL_920301, EPI_ISL_920303, EPI_ISL_920320, EPI_ISL_920331, EPI_ISL_920356, EPI_ISL_920373, EPI_ISL_920378, EPI_ISL_920459, EPI_ISL_920462, EPI_ISL_920470, EPI_ISL_920477, EPI_ISL_920485, EPI_ISL_920492, EPI_ISL_920494, EPI_ISL_920499, EPI_ISL_920500, EPI_ISL_920502, EPI_ISL_920504, EPI_ISL_920510, EPI_ISL_920512, EPI_ISL_920513, EPI_ISL_920515, EPI_ISL_920516, EPI_ISL_920518, EPI_ISL_920519, EPI_ISL_920521, EPI_ISL_920537, EPI_ISL_920538, EPI_ISL_920540, EPI_ISL_920549, EPI_ISL_920550, EPI_ISL_920559, EPI_ISL_920560, EPI_ISL_920567, EPI_ISL_920576, EPI_ISL_920585, EPI_ISL_920594, EPI_ISL_920595, EPI_ISL_920621, EPI_ISL_920631, EPI_ISL_920637, EPI_ISL_920647, EPI_ISL_920659 | University College London Hospital                                                                                                                                                              | COVID-19 Genomics UK (COG-UK) Consortium | Judith Heaney, Matthew Byott, Catherine Houlihan, Dan Frampton, Stuart Kirk, Moira Spyer and Eleni Nastouli                                                                                                                                                                                                                                                                                                                             |
| see above                                                                                                                                                                                                                                                                                                                                                                                                                                                                                                                                                                                                                                                                                                                                                                                                                                                                                                                                      |                                                                                                                                                                                                 |                                          |                                                                                                                                                                                                                                                                                                                                                                                                                                         |







|                                                                                                                                                                                                                                                                                                                                |                                                                                                                                |                                                                                                                                                                                          |                                                                                                                                                                                                                                                                                                                                                      |
|--------------------------------------------------------------------------------------------------------------------------------------------------------------------------------------------------------------------------------------------------------------------------------------------------------------------------------|--------------------------------------------------------------------------------------------------------------------------------|------------------------------------------------------------------------------------------------------------------------------------------------------------------------------------------|------------------------------------------------------------------------------------------------------------------------------------------------------------------------------------------------------------------------------------------------------------------------------------------------------------------------------------------------------|
| EPI_ISL_942967, EPI_ISL_942968                                                                                                                                                                                                                                                                                                 | General Hospital - Kumanovo                                                                                                    | "Georgi D. Efremov" , Macedonian Academy of Sciences and Arts<br>Research Center for Genetic Engineering and Biotechnology "Georgi D. Efremov" , Macedonian Academy of Sciences and Arts | Aleksandar J. Dimovski, Dijana Plasheska-Karanfilska, Predrag Noveski, Gjorgji Bozinovski, Milena Jakimovska                                                                                                                                                                                                                                         |
| EPI_ISL_942969                                                                                                                                                                                                                                                                                                                 | General Hospital - Veles                                                                                                       | Research Center for Genetic Engineering and Biotechnology "Georgi D. Efremov" , Macedonian Academy of Sciences and Arts                                                                  | Aleksandar J. Dimovski, Dijana Plasheska-Karanfilska, Predrag Noveski, Gjorgji Bozinovski, Milena Jakimovska                                                                                                                                                                                                                                         |
| EPI_ISL_943015, EPI_ISL_943022, EPI_ISL_943359, EPI_ISL_943430                                                                                                                                                                                                                                                                 | Dutch COVID-19 response team                                                                                                   | National Institute for Public Health and the Environment (RIVM)                                                                                                                          | Adam Meijer, Harry Vennema, Dirk Eggink, Jeroen Cremer, Sharon van den Brink, Bas van der Veer, AnneMarie van den Brandt, Florian Zwagemaker, Dennis Schmitz, Chantal Reusken, on behalf of the national COVID-19 response team                                                                                                                      |
| EPI_ISL_943986                                                                                                                                                                                                                                                                                                                 | LACEN do Estado de Tocantins                                                                                                   | Instituto Adolfo Lutz, Interdisciplinary Procedures Center, Strategic Laboratory                                                                                                         | Claudio Tavares Sacchi, Claudia Regina Gonçalves, Erica Valessa Ramos Gomes, Karoline Rodrigues Campos                                                                                                                                                                                                                                               |
| EPI_ISL_943993                                                                                                                                                                                                                                                                                                                 | General Hospital - Strumica                                                                                                    | Research Center for Genetic Engineering and Biotechnology "Georgi D. Efremov" , Macedon                                                                                                  | Aleksandar J. Dimovski, Dijana Plasheska-Karanfilska, Predrag Noveski, Gjorgji Bozinovski                                                                                                                                                                                                                                                            |
| EPI_ISL_943994                                                                                                                                                                                                                                                                                                                 | General Hospital - Strumica                                                                                                    | Research Center for Genetic Engineering and Biotechnology "Georgi D. Efremov" , Macedonian Academy of Sciences and Arts                                                                  | Aleksandar J. Dimovski, Dijana Plasheska-Karanfilska, Predrag Noveski, Gjorgji Bozinovski, Mi                                                                                                                                                                                                                                                        |
| EPI_ISL_943995                                                                                                                                                                                                                                                                                                                 | General Hospital - Veles                                                                                                       | Research Center for Genetic Engineering and Biotechnology "Georgi D. Efremov" , Macedonian Academy of Sciences and Arts                                                                  | Aleksandar J. Dimovski, Dijana Plasheska-Karanfilska, Predrag Noveski, Gjorgji Bozinovski, Milena Jakimovska                                                                                                                                                                                                                                         |
| EPI_ISL_943996, EPI_ISL_943997                                                                                                                                                                                                                                                                                                 | General Hospital - Tetovo                                                                                                      | Research Center for Genetic Engineering and Biotechnology "Georgi D. Efremov" , Macedonian Academy of Sciences and Arts                                                                  | Aleksandar J. Dimovski, Dijana Plasheska-Karanfilska, Predrag Noveski, Gjorgji Bozinovski, Milena Jakimovska                                                                                                                                                                                                                                         |
| EPI_ISL_943998                                                                                                                                                                                                                                                                                                                 | General Hospital - Strumica                                                                                                    | Research Center for Genetic Engineering and Biotechnology "Georgi D. Efremov" , Macedonian Academy of Sciences and Arts                                                                  | Aleksandar J. Dimovski, Dijana Plasheska-Karanfilska, Predrag Noveski, Gjorgji Bozinovski, Milena Jakimovska                                                                                                                                                                                                                                         |
| EPI_ISL_944094, EPI_ISL_944096, EPI_ISL_944099, EPI_ISL_944100, EPI_ISL_944102, EPI_ISL_944103, EPI_ISL_944104                                                                                                                                                                                                                 | Institute for Medical Research, Infectious Disease Research Centre, National Institutes of Health, Ministry of Health Malaysia | Institute for Medical Research, Infectious Disease Research Centre, National Institutes of Health Malaysia                                                                               | Suppiah J, Kamel K, Azizan MA, Thayan R                                                                                                                                                                                                                                                                                                              |
| EPI_ISL_944105, EPI_ISL_944106                                                                                                                                                                                                                                                                                                 | General Hospital - Strumica                                                                                                    | Research Center for Genetic Engineering and Biotechnology "Georgi D. Efremov" , Macedonian Academy of Sciences and Arts                                                                  | Aleksandar J. Dimovski, Dijana Plasheska-Karanfilska, Predrag Noveski, Gjorgji Bozinovski, Milena Jakimovska                                                                                                                                                                                                                                         |
| EPI_ISL_944107                                                                                                                                                                                                                                                                                                                 | General Hospital - Tetovo                                                                                                      | Research Center for Genetic Engineering and Biotechnology "Georgi D. Efremov" , Macedonian Academy of Sciences and Arts                                                                  | Aleksandar J. Dimovski, Dijana Plasheska-Karanfilska, Predrag Noveski, Gjorgji Bozinovski, Milena Jakimovska                                                                                                                                                                                                                                         |
| EPI_ISL_944108, EPI_ISL_944109                                                                                                                                                                                                                                                                                                 | General Hospital - Struga                                                                                                      | Research Center for Genetic Engineering and Biotechnology "Georgi D. Efremov" , Macedonian Academy of Sciences and Arts                                                                  | Aleksandar J. Dimovski, Dijana Plasheska-Karanfilska, Predrag Noveski, Gjorgji Bozinovski, Milena Jakimovska                                                                                                                                                                                                                                         |
| EPI_ISL_944236, EPI_ISL_944237, EPI_ISL_944244, EPI_ISL_944256, EPI_ISL_944257, EPI_ISL_944258, EPI_ISL_944259, EPI_ISL_944260, EPI_ISL_944261, EPI_ISL_944262, EPI_ISL_944263, EPI_ISL_944265, EPI_ISL_944271, EPI_ISL_944273, EPI_ISL_944274, EPI_ISL_944275, EPI_ISL_944414, EPI_ISL_944438, EPI_ISL_944441, EPI_ISL_944442 | Israel Central Virology laboratory                                                                                             | Israel National Consortium for SARS-CoV-2 sequencing                                                                                                                                     | Neta Zuckerman, Efrat Dahan Bucris, Michal Mandelboim, Dana Bar-Ilan, Oran Erster, Tzvia Mann, Omer Murik, David A. Zeevi, Assaf Rokney, Joseph Jaffe, Eva Nachum, Maya Davidovich Cohen, Ephraim Fass, Gal Zizelski Valenci, Mor Rubinstein, Efrat Rorman, Israel Nissan, Efrat Glick-Saar, Omri Nayshool, Gideon Rechavi, Ella Mendelson, Orna Mor |
| see above                                                                                                                                                                                                                                                                                                                      | Israel Central Virology laboratory                                                                                             | Israel National Consortium for SARS-CoV-2 sequencing                                                                                                                                     | Son Nguyen et al                                                                                                                                                                                                                                                                                                                                     |
| EPI_ISL_944737                                                                                                                                                                                                                                                                                                                 | Public Health Virology-Forensic and Scientific Services (PHV-FSS)                                                              | Public Health Virology-Forensic and Scientific Services (PHV-FSS)                                                                                                                        |                                                                                                                                                                                                                                                                                                                                                      |
| EPI_ISL_944779                                                                                                                                                                                                                                                                                                                 | General Hospital - Tetovo                                                                                                      | Research Center for Genetic Engineering and Biotechnology "Georgi D. Efremov" , Macedonian Academy of Sciences and Arts                                                                  | Aleksandar J. Dimovski, Dijana Plasheska-Karanfilska, Predrag Noveski, Gjorgji Bozinovski, Milena Jakimovska                                                                                                                                                                                                                                         |
| EPI_ISL_944786                                                                                                                                                                                                                                                                                                                 | General Hospital - Prilep                                                                                                      | Research Center for Genetic Engineering and Biotechnology "Georgi D. Efremov" , Macedonian Academy of Sciences and Arts                                                                  | Aleksandar J. Dimovski, Dijana Plasheska-Karanfilska, Predrag Noveski, Gjorgji Bozinovski, Milena Jakimovska                                                                                                                                                                                                                                         |
| EPI_ISL_945073                                                                                                                                                                                                                                                                                                                 | Lighthouse Lab in Glasgow                                                                                                      | Wellcome Sanger Institute for the COVID-19 Genomics UK (COG-UK) Consortium                                                                                                               | Harper VanSteenhouse, Yumi Kasai, David Gray, Carol Clugston, Anna Dominiczak and Alex Alderton, Roberto Amato, Sonia Goncalves, Ewan Harrison, David K. Jackson, Ian Johnston, Dominic Kwiatkowski, Cordelia Langford, John Sillitoe on behalf of the Wellcome Sanger Institute COVID-19 Surveillance Team                                          |
| EPI_ISL_945085, EPI_ISL_945089, EPI_ISL_945109                                                                                                                                                                                                                                                                                 | Lighthouse Lab in Cambridge                                                                                                    | Wellcome Sanger Institute for the COVID-19 Genomics UK (COG-UK) Consortium                                                                                                               | Rob Howes, The Lighthouse Lab in Cambridge and Alex Alderton, Roberto Amato, Sonia Goncalves, Ewan Harrison, David K. Jackson, Ian Johnston, Dominic Kwiatkowski, Cordelia Langford, John Sillitoe on behalf of the Wellcome Sanger Institute COVID-19 Surveillance Team                                                                             |
| EPI_ISL_945111                                                                                                                                                                                                                                                                                                                 | Lighthouse Lab in Milton Keynes                                                                                                | Wellcome Sanger Institute for the COVID-19 Genomics UK (COG-UK) Consortium                                                                                                               | The Lighthouse Lab in Milton Keynes and Alex Alderton, Roberto Amato, Sonia Goncalves, Ewan Harrison, David K. Jackson, Ian Johnston, Dominic Kwiatkowski, Cordelia Langford, John Sillitoe on behalf of the Wellcome Sanger Institute COVID-19 Surveillance Team                                                                                    |
| EPI_ISL_945117                                                                                                                                                                                                                                                                                                                 | Lighthouse Lab in Alderley Park                                                                                                | Wellcome Sanger Institute for the COVID-19 Genomics UK (COG-UK) Consortium                                                                                                               | Jacquelyn Wynn, Mairead Hyland, The Lighthouse Lab in Alderley Park and Alex Alderton, Roberto Amato, Sonia Goncalves, Ewan Harrison, David K. Jackson, Ian Johnston, Dominic Kwiatkowski, Cordelia Langford, John Sillitoe on behalf of the Wellcome Sanger Institute COVID-19 Surveillance Team                                                    |
| EPI_ISL_945119                                                                                                                                                                                                                                                                                                                 | Lighthouse Lab in Milton Keynes                                                                                                | Wellcome Sanger Institute for the COVID-19 Genomics UK (COG-UK) Consortium                                                                                                               | The Lighthouse Lab in Milton Keynes and Alex Alderton, Roberto Amato, Sonia Goncalves, Ewan Harrison, David K. Jackson, Ian Johnston, Dominic Kwiatkowski, Cordelia Langford, John Sillitoe on behalf of the Wellcome Sanger Institute COVID-19 Surveillance Team                                                                                    |
| EPI_ISL_945126, EPI_ISL_945136                                                                                                                                                                                                                                                                                                 | Lighthouse Lab in Glasgow                                                                                                      | Wellcome Sanger Institute for the COVID-19 Genomics UK (COG-UK) Consortium                                                                                                               | Harper VanSteenhouse, Yumi Kasai, David Gray, Carol Clugston, Anna Dominiczak and Alex Alderton, Roberto Amato, Sonia Goncalves, Ewan Harrison, David K. Jackson, Ian Johnston, Dominic Kwiatkowski, Cordelia Langford, John Sillitoe on behalf of the Wellcome Sanger Institute COVID-19 Surveillance Team                                          |
| EPI_ISL_945170                                                                                                                                                                                                                                                                                                                 | Lighthouse Lab in Cambridge                                                                                                    | Wellcome Sanger Institute for the COVID-19 Genomics UK (COG-UK) Consortium                                                                                                               | Rob Howes, The Lighthouse Lab in Cambridge and Alex Alderton, Roberto Amato, Sonia Goncalves, Ewan Harrison, David K. Jackson, Ian Johnston, Dominic Kwiatkowski, Cordelia Langford, John Sillitoe on behalf of the Wellcome Sanger Institute COVID-19 Surveillance Team                                                                             |
| EPI_ISL_945171                                                                                                                                                                                                                                                                                                                 | Lighthouse Lab in Milton Keynes                                                                                                | Wellcome Sanger Institute for the COVID-19 Genomics UK (COG-UK) Consortium                                                                                                               | The Lighthouse Lab in Milton Keynes and Alex Alderton, Roberto Amato, Sonia Goncalves, Ewan Harrison, David K. Jackson, Ian Johnston, Dominic Kwiatkowski, Cordelia Langford, John Sillitoe on behalf of the Wellcome Sanger Institute COVID-19 Surveillance Team                                                                                    |
| EPI_ISL_945188                                                                                                                                                                                                                                                                                                                 | Lighthouse Lab in Cambridge                                                                                                    | Wellcome Sanger Institute for the COVID-19 Genomics UK (COG-UK) Consortium                                                                                                               | Rob Howes, The Lighthouse Lab in Cambridge and Alex Alderton, Roberto Amato, Sonia Goncalves, Ewan Harrison, David K. Jackson, Ian Johnston, Dominic Kwiatkowski, Cordelia Langford, John Sillitoe on behalf of the Wellcome Sanger Institute COVID-19 Surveillance Team                                                                             |
| EPI_ISL_945201                                                                                                                                                                                                                                                                                                                 | Lighthouse Lab in Alderley Park                                                                                                | Wellcome Sanger Institute for the COVID-19 Genomics UK                                                                                                                                   | Jacquelyn Wynn, Mairead Hyland, The Lighthouse Lab in Alderley Park and Alex Alderton, Roberto Amato, Sonia Goncalves, Ewan Harrison, David K.                                                                                                                                                                                                       |

[illegible]





|                                                                                                                                                                                                                                                                                                                                                                                                                                                |                                                                                                                                        |                                                                                                                                        |                                                                                                                                                                                                                                                                                                                                                                                                                                |
|------------------------------------------------------------------------------------------------------------------------------------------------------------------------------------------------------------------------------------------------------------------------------------------------------------------------------------------------------------------------------------------------------------------------------------------------|----------------------------------------------------------------------------------------------------------------------------------------|----------------------------------------------------------------------------------------------------------------------------------------|--------------------------------------------------------------------------------------------------------------------------------------------------------------------------------------------------------------------------------------------------------------------------------------------------------------------------------------------------------------------------------------------------------------------------------|
| EPI_ISL_955569, EPI_ISL_955572, EPI_ISL_955576, EPI_ISL_955577, EPI_ISL_955583, EPI_ISL_955585, EPI_ISL_955586, EPI_ISL_955587, EPI_ISL_955588, EPI_ISL_955589, EPI_ISL_955598, EPI_ISL_955601, EPI_ISL_955603, EPI_ISL_955605, EPI_ISL_955610, EPI_ISL_955612, EPI_ISL_955613, EPI_ISL_955615, EPI_ISL_955616, EPI_ISL_955617, EPI_ISL_955618, EPI_ISL_955619, EPI_ISL_955620, EPI_ISL_955621, EPI_ISL_955622, EPI_ISL_955623                 |                                                                                                                                        |                                                                                                                                        |                                                                                                                                                                                                                                                                                                                                                                                                                                |
| see above                                                                                                                                                                                                                                                                                                                                                                                                                                      | Santa Clara County Public Health Laboratory                                                                                            | Chan-Zuckerberg Biohub                                                                                                                 | CZB Clichub Consortium                                                                                                                                                                                                                                                                                                                                                                                                         |
| EPI_ISL_955633, EPI_ISL_955635, EPI_ISL_955637, EPI_ISL_955640, EPI_ISL_955643, EPI_ISL_955644, EPI_ISL_955645, EPI_ISL_955646, EPI_ISL_955647, EPI_ISL_955654, EPI_ISL_955656, EPI_ISL_955661, EPI_ISL_955665, EPI_ISL_955666                                                                                                                                                                                                                 |                                                                                                                                        |                                                                                                                                        |                                                                                                                                                                                                                                                                                                                                                                                                                                |
| see above                                                                                                                                                                                                                                                                                                                                                                                                                                      | Orange County Public Health Lab                                                                                                        | Chan-Zuckerberg Biohub                                                                                                                 | CZB Clichub Consortium                                                                                                                                                                                                                                                                                                                                                                                                         |
| EPI_ISL_955695, EPI_ISL_955701, EPI_ISL_955706, EPI_ISL_955707, EPI_ISL_955709, EPI_ISL_955710, EPI_ISL_955711, EPI_ISL_955717, EPI_ISL_955718, EPI_ISL_955719, EPI_ISL_955723, EPI_ISL_955725, EPI_ISL_955728, EPI_ISL_955731, EPI_ISL_955736, EPI_ISL_955738, EPI_ISL_955739, EPI_ISL_955740, EPI_ISL_955741, EPI_ISL_955744, EPI_ISL_955745, EPI_ISL_955751, EPI_ISL_955754, EPI_ISL_955756, EPI_ISL_955757, EPI_ISL_955758, EPI_ISL_955766 |                                                                                                                                        |                                                                                                                                        |                                                                                                                                                                                                                                                                                                                                                                                                                                |
| see above                                                                                                                                                                                                                                                                                                                                                                                                                                      | Humboldt County Public Health Laboratory                                                                                               | Chan-Zuckerberg Biohub                                                                                                                 | CZB Clichub Consortium                                                                                                                                                                                                                                                                                                                                                                                                         |
| EPI_ISL_956279                                                                                                                                                                                                                                                                                                                                                                                                                                 | Siti Khodijah Hospital                                                                                                                 | Institute of Tropical Disease, Universitas Airlangga                                                                                   | Jezzy R Dewantari, Rima R Prasetya, Krisnoadi Rahardjo, Aldise M Nastri, Muhammad Hamdan, Gatot Soegiarto, Laksmi Wulandari, Resti Yudhawati, Soetjpto, Yasuko Mori, Maria I Lusida, Kazutumi Shimizu                                                                                                                                                                                                                          |
| EPI_ISL_956323, EPI_ISL_956324, EPI_ISL_956325, EPI_ISL_956326                                                                                                                                                                                                                                                                                                                                                                                 | Laboratory Medicine                                                                                                                    | Department of Laboratory Medicine, Lin-Kou Chang Gung Memorial Hospital, Taoyuan, Taiwan                                               | Kuo-Chien Tsao, Yu-Nong Gong, Shu-Li Yang, Yi-Chun Liu, Chung-Guei Huang, Mei-Jen Hsiao, Po-Wei Huang, Cheng-Ta Yang, Cheng-Hsun Chiu, Peng-Nien Huang, Kuo-Ming Lee, Guang-Wu Chen, Shin-Ru Shih                                                                                                                                                                                                                              |
| EPI_ISL_956345                                                                                                                                                                                                                                                                                                                                                                                                                                 | Houston Health Department, Disease Prevention and Control                                                                              | Houston Health Department, Disease Prevention and Control                                                                              | Penn,R., Brown,P., Lara,A.                                                                                                                                                                                                                                                                                                                                                                                                     |
| EPI_ISL_956382, EPI_ISL_956383                                                                                                                                                                                                                                                                                                                                                                                                                 | General Hospital - Prilep                                                                                                              | Research Center for Genetic Engineering and Biotechnology "Georgi D. Efremov", Macedonian Academy of Sciences and Arts                 | Aleksandar J. Dimovski, Dijana Plasheska-Karanfilska, Predrag Noveski, Gjorgji Bozinovski, Milena Jakimovska                                                                                                                                                                                                                                                                                                                   |
| EPI_ISL_956402                                                                                                                                                                                                                                                                                                                                                                                                                                 | General Hospital - Ohrid                                                                                                               | Research Center for Genetic Engineering and Biotechnology "Georgi D. Efremov" , Macedonian Academy of Sciences and Arts                | Aleksandar J. Dimovski, Dijana Plasheska-Karanfilska, Predrag Noveski, Gjorgji Bozinovski, Milena Jakimovska                                                                                                                                                                                                                                                                                                                   |
| EPI_ISL_956403                                                                                                                                                                                                                                                                                                                                                                                                                                 | Institute for prevention, treatment and rehabilitation of cardiovascular diseases - Ohrid                                              | Research Center for Genetic Engineering and Biotechnology "Georgi D. Efremov", Macedonian Academy of Sciences and Arts                 | Aleksandar J. Dimovski, Dijana Plasheska-Karanfilska, Predrag Noveski, Gjorgji Bozinovski, Milena Jakimovska                                                                                                                                                                                                                                                                                                                   |
| EPI_ISL_959499, EPI_ISL_959531, EPI_ISL_959532, EPI_ISL_959533, EPI_ISL_959534, EPI_ISL_959535, EPI_ISL_959536, EPI_ISL_959537                                                                                                                                                                                                                                                                                                                 | Division of Emerging Infectious Diseases, Bureau of Infectious Diseases Diagnosis Control, Korea Disease Control and Prevention Agency | Division of Emerging Infectious Diseases, Bureau of Infectious Diseases Diagnosis Control, Korea Disease Control and Prevention Agency | Ae Kyung Park, Il-Hwan Kim, Heui Man Kim, Jeong-Min Kim, Namjoo Lee, Chae Young Lee, Sang Hee Woo, Eun-Jin Kim                                                                                                                                                                                                                                                                                                                 |
| EPI_ISL_960192, EPI_ISL_960216                                                                                                                                                                                                                                                                                                                                                                                                                 | Virginia Division of Consolidated Laboratory Services                                                                                  | Virginia Division of Consolidated Laboratory Services                                                                                  | Virginia DCLS                                                                                                                                                                                                                                                                                                                                                                                                                  |
| EPI_ISL_960224, EPI_ISL_960225                                                                                                                                                                                                                                                                                                                                                                                                                 | QElI Health Sciences Centre                                                                                                            | National Microbiology Laboratory (NML)                                                                                                 | Anna Majer, Shari Tyson, Grace Seo, Philip Mabon, Elsie Grudeski, Rhiannon Huzarewich, Russell Mandes, Anneliese Landgraff, Jennifer Tanner, Natalie Knox, Morag Graham, Gary Van Domselaar, Todd Hatchette, Jason LeBlanc, Janice Pettipas, Dan Gaston, Nathalie Bastien, Yan Li, Timothy Booth, Darian Hole, Madison Chapel, Kirsten Biggar, CanCOGeN's metadata curation team, Public Health Agency of Canada CanCOGeN team |
| EPI_ISL_960414, EPI_ISL_960417, EPI_ISL_960418, EPI_ISL_960424, EPI_ISL_960425, EPI_ISL_960434, EPI_ISL_960435                                                                                                                                                                                                                                                                                                                                 | The National Institute of Public Health                                                                                                | State Veterinary Institute Prague                                                                                                      | Nagy,A;Vecerova,J;Cernikova,L;Stara,M;Jirincova,H;Trnka,D                                                                                                                                                                                                                                                                                                                                                                      |
| EPI_ISL_960683, EPI_ISL_960684                                                                                                                                                                                                                                                                                                                                                                                                                 | Germano de sousa                                                                                                                       | Instituto Gulbenkian de Ciencia                                                                                                        | Cathy Paulino, João Costa, João Sobral, Maria Costa, Susana Ladeiro, Ricardo Leite                                                                                                                                                                                                                                                                                                                                             |
| EPI_ISL_960686                                                                                                                                                                                                                                                                                                                                                                                                                                 | Germano de sousa                                                                                                                       | Instituto Gulbenkian de Ciencia                                                                                                        | Maria Costa, Susana Ladeiro, Cathy Paulino, João Costa, João Sobral, Ricardo Leite                                                                                                                                                                                                                                                                                                                                             |
| EPI_ISL_960688                                                                                                                                                                                                                                                                                                                                                                                                                                 | Germano de sousa                                                                                                                       | Instituto Gulbenkian de Ciencia                                                                                                        | Cathy Paulino, João Costa, João Sobral, Maria Costa, Susana Ladeiro, Ricardo Leite                                                                                                                                                                                                                                                                                                                                             |
| EPI_ISL_960689, EPI_ISL_960691                                                                                                                                                                                                                                                                                                                                                                                                                 | Germano de sousa                                                                                                                       | Instituto Gulbenkian de Ciencia                                                                                                        | Maria Costa, Susana Ladeiro, Cathy Paulino, João Costa, João Sobral, Ricardo Leite                                                                                                                                                                                                                                                                                                                                             |
| EPI_ISL_960692, EPI_ISL_960693                                                                                                                                                                                                                                                                                                                                                                                                                 | Germano de sousa                                                                                                                       | Instituto Gulbenkian de Ciencia                                                                                                        | Susana Ladeiro, Cathy Paulino, João Costa, João Sobral, Maria Costa, Ricardo Leite                                                                                                                                                                                                                                                                                                                                             |
| EPI_ISL_960700, EPI_ISL_960702                                                                                                                                                                                                                                                                                                                                                                                                                 | Germano de sousa                                                                                                                       | Instituto Gulbenkian de Ciencia                                                                                                        | João Costa, João Sobral, Maria Costa, Susana Ladeiro, Cathy Paulino, Ricardo Leite                                                                                                                                                                                                                                                                                                                                             |
| EPI_ISL_960705                                                                                                                                                                                                                                                                                                                                                                                                                                 | Germano de sousa                                                                                                                       | Instituto Gulbenkian de Ciencia                                                                                                        | Cathy Paulino, João Costa, João Sobral, Maria Costa, Susana Ladeiro, Ricardo Leite                                                                                                                                                                                                                                                                                                                                             |
| EPI_ISL_960706                                                                                                                                                                                                                                                                                                                                                                                                                                 | Germano de sousa                                                                                                                       | Instituto Gulbenkian de Ciencia                                                                                                        | João Costa, João Sobral, Maria Costa, Susana Ladeiro, Cathy Paulino, Ricardo Leite                                                                                                                                                                                                                                                                                                                                             |
| EPI_ISL_960707, EPI_ISL_960709                                                                                                                                                                                                                                                                                                                                                                                                                 | Germano de sousa                                                                                                                       | Instituto Gulbenkian de Ciencia                                                                                                        | João Sobral, Maria Costa, Susana Ladeiro, Cathy Paulino, João Costa, Ricardo Leite                                                                                                                                                                                                                                                                                                                                             |
| EPI_ISL_960710, EPI_ISL_960712                                                                                                                                                                                                                                                                                                                                                                                                                 | Germano de sousa                                                                                                                       | Instituto Gulbenkian de Ciencia                                                                                                        | Cathy Paulino, João Costa, João Sobral, Maria Costa, Susana Ladeiro, Ricardo Leite                                                                                                                                                                                                                                                                                                                                             |
| EPI_ISL_960713                                                                                                                                                                                                                                                                                                                                                                                                                                 | Germano de sousa                                                                                                                       | Instituto Gulbenkian de Ciencia                                                                                                        | João Costa, João Sobral, Maria Costa, Susana Ladeiro, Cathy Paulino, Ricardo Leite                                                                                                                                                                                                                                                                                                                                             |
| EPI_ISL_960716, EPI_ISL_960717, EPI_ISL_960718, EPI_ISL_960719                                                                                                                                                                                                                                                                                                                                                                                 | Germano de sousa                                                                                                                       | Instituto Gulbenkian de Ciencia                                                                                                        | Susana Ladeiro, Cathy Paulino, João Costa, João Sobral, Maria Costa, Ricardo Leite                                                                                                                                                                                                                                                                                                                                             |
| EPI_ISL_960720                                                                                                                                                                                                                                                                                                                                                                                                                                 | Germano de sousa                                                                                                                       | Instituto Gulbenkian de Ciencia                                                                                                        | Cathy Paulino, João Costa, João Sobral, Maria Costa, Susana Ladeiro, Ricardo Leite                                                                                                                                                                                                                                                                                                                                             |
| EPI_ISL_960721                                                                                                                                                                                                                                                                                                                                                                                                                                 | Germano de sousa                                                                                                                       | Instituto Gulbenkian de Ciencia                                                                                                        | João Sobral, Maria Costa, Susana Ladeiro, Cathy Paulino, João Costa, Ricardo Leite                                                                                                                                                                                                                                                                                                                                             |
| EPI_ISL_960722                                                                                                                                                                                                                                                                                                                                                                                                                                 | Germano de sousa                                                                                                                       | Instituto Gulbenkian de Ciencia                                                                                                        | Maria Costa, Susana Ladeiro, Cathy Paulino, João Costa, João Sobral, Ricardo Leite                                                                                                                                                                                                                                                                                                                                             |
| EPI_ISL_960724                                                                                                                                                                                                                                                                                                                                                                                                                                 | Germano de sousa                                                                                                                       | Instituto Gulbenkian de Ciencia                                                                                                        | João Costa, João Sobral, Maria Costa, Susana Ladeiro, Cathy Paulino, Ricardo Leite                                                                                                                                                                                                                                                                                                                                             |
| EPI_ISL_960726, EPI_ISL_960727, EPI_ISL_960729                                                                                                                                                                                                                                                                                                                                                                                                 | Germano de sousa                                                                                                                       | Instituto Gulbenkian de Ciencia                                                                                                        | Cathy Paulino, João Costa, João Sobral, Maria Costa, Susana Ladeiro, Ricardo Leite                                                                                                                                                                                                                                                                                                                                             |
| EPI_ISL_960730, EPI_ISL_960731, EPI_ISL_960732                                                                                                                                                                                                                                                                                                                                                                                                 | Germano de sousa                                                                                                                       | Instituto Gulbenkian de Ciencia                                                                                                        | João Costa, João Sobral, Maria Costa, Susana Ladeiro, Cathy Paulino, Ricardo Leite                                                                                                                                                                                                                                                                                                                                             |
| EPI_ISL_960733                                                                                                                                                                                                                                                                                                                                                                                                                                 | Germano de sousa                                                                                                                       | Instituto Gulbenkian de Ciencia                                                                                                        | João Sobral, Maria Costa, Susana Ladeiro, Cathy Paulino, João Costa, Ricardo Leite                                                                                                                                                                                                                                                                                                                                             |
| EPI_ISL_960738, EPI_ISL_960739, EPI_ISL_960741, EPI_ISL_960742, EPI_ISL_960743, EPI_ISL_960745, EPI_ISL_960746, EPI_ISL_960747                                                                                                                                                                                                                                                                                                                 | Germano de sousa                                                                                                                       | Instituto Gulbenkian de Ciencia                                                                                                        | Maria Costa, Susana Ladeiro, Cathy Paulino, João Costa, João Sobral, Ricardo Leite                                                                                                                                                                                                                                                                                                                                             |
| EPI_ISL_960748, EPI_ISL_960749                                                                                                                                                                                                                                                                                                                                                                                                                 | Germano de sousa                                                                                                                       | Instituto Gulbenkian de Ciencia                                                                                                        | Susana Ladeiro, Cathy Paulino, João Costa, João Sobral, Maria Costa, Ricardo Leite                                                                                                                                                                                                                                                                                                                                             |
| EPI_ISL_960751                                                                                                                                                                                                                                                                                                                                                                                                                                 | Germano de sousa                                                                                                                       | Instituto Gulbenkian de Ciencia                                                                                                        | Cathy Paulino, João Costa, João Sobral, Maria Costa, Susana Ladeiro, Ricardo Leite                                                                                                                                                                                                                                                                                                                                             |
| EPI_ISL_960753, EPI_ISL_960754                                                                                                                                                                                                                                                                                                                                                                                                                 | Germano de sousa                                                                                                                       | Instituto Gulbenkian de Ciencia                                                                                                        | João Costa, João Sobral, Maria Costa, Susana Ladeiro, Cathy Paulino, Ricardo Leite                                                                                                                                                                                                                                                                                                                                             |
| EPI_ISL_960756, EPI_ISL_960757                                                                                                                                                                                                                                                                                                                                                                                                                 | Germano de sousa                                                                                                                       | Instituto Gulbenkian de Ciencia                                                                                                        | João Sobral, Maria Costa, Susana Ladeiro, Cathy Paulino, João Costa, Ricardo Leite                                                                                                                                                                                                                                                                                                                                             |
| EPI_ISL_960758, EPI_ISL_960759, EPI_ISL_960760, EPI_ISL_960761, EPI_ISL_960762                                                                                                                                                                                                                                                                                                                                                                 | Germano de sousa                                                                                                                       | Instituto Gulbenkian de Ciencia                                                                                                        | Susana Ladeiro, Cathy Paulino, João Costa, João Sobral, Maria Costa, Ricardo Leite                                                                                                                                                                                                                                                                                                                                             |

|                                                                                                                                                                                                                                                                                                                                                                                                                                                                                                                                                                                                 |                                                                                                           |                                          |                                                                                                                                                                                                                                                                                                                                                                                                                                  |
|-------------------------------------------------------------------------------------------------------------------------------------------------------------------------------------------------------------------------------------------------------------------------------------------------------------------------------------------------------------------------------------------------------------------------------------------------------------------------------------------------------------------------------------------------------------------------------------------------|-----------------------------------------------------------------------------------------------------------|------------------------------------------|----------------------------------------------------------------------------------------------------------------------------------------------------------------------------------------------------------------------------------------------------------------------------------------------------------------------------------------------------------------------------------------------------------------------------------|
| EPI_ISL_960766, EPI_ISL_960767, EPI_ISL_960768                                                                                                                                                                                                                                                                                                                                                                                                                                                                                                                                                  | Germano de sousa                                                                                          | Instituto Gulbenkian de Ciencia          | João Sobral, Maria Costa, Susana Ladeiro, Cathy Paulino, João Costa, Ricardo Leite                                                                                                                                                                                                                                                                                                                                               |
| EPI_ISL_960769                                                                                                                                                                                                                                                                                                                                                                                                                                                                                                                                                                                  | Germano de sousa                                                                                          | Instituto Gulbenkian de Ciencia          | Cathy Paulino, João Costa, João Sobral, Maria Costa, Susana Ladeiro, Ricardo Leite                                                                                                                                                                                                                                                                                                                                               |
| EPI_ISL_960772                                                                                                                                                                                                                                                                                                                                                                                                                                                                                                                                                                                  | Germano de sousa                                                                                          | Instituto Gulbenkian de Ciencia          | João Sobral, Maria Costa, Susana Ladeiro, Cathy Paulino, João Costa, Ricardo Leite                                                                                                                                                                                                                                                                                                                                               |
| EPI_ISL_960773                                                                                                                                                                                                                                                                                                                                                                                                                                                                                                                                                                                  | Germano de sousa                                                                                          | Instituto Gulbenkian de Ciencia          | Maria Costa, Susana Ladeiro, Cathy Paulino, João Costa, João Sobral, Ricardo Leite                                                                                                                                                                                                                                                                                                                                               |
| EPI_ISL_960774                                                                                                                                                                                                                                                                                                                                                                                                                                                                                                                                                                                  | Germano de sousa                                                                                          | Instituto Gulbenkian de Ciencia          | João Costa, João Sobral, Maria Costa, Susana Ladeiro, Cathy Paulino, Ricardo Leite                                                                                                                                                                                                                                                                                                                                               |
| EPI_ISL_960775                                                                                                                                                                                                                                                                                                                                                                                                                                                                                                                                                                                  | Germano de sousa                                                                                          | Instituto Gulbenkian de Ciencia          | Cathy Paulino, João Costa, João Sobral, Maria Costa, Susana Ladeiro, Ricardo Leite                                                                                                                                                                                                                                                                                                                                               |
| EPI_ISL_960777, EPI_ISL_960779                                                                                                                                                                                                                                                                                                                                                                                                                                                                                                                                                                  | Germano de sousa                                                                                          | Instituto Gulbenkian de Ciencia          | João Sobral, Maria Costa, Susana Ladeiro, Cathy Paulino, João Costa, Ricardo Leite                                                                                                                                                                                                                                                                                                                                               |
| EPI_ISL_960780                                                                                                                                                                                                                                                                                                                                                                                                                                                                                                                                                                                  | Germano de sousa                                                                                          | Instituto Gulbenkian de Ciencia          | Cathy Paulino, João Costa, João Sobral, Maria Costa, Susana Ladeiro, Ricardo Leite                                                                                                                                                                                                                                                                                                                                               |
| EPI_ISL_960781, EPI_ISL_960782                                                                                                                                                                                                                                                                                                                                                                                                                                                                                                                                                                  | Germano de sousa                                                                                          | Instituto Gulbenkian de Ciencia          | João Costa, João Sobral, Maria Costa, Susana Ladeiro, Cathy Paulino, Ricardo Leite                                                                                                                                                                                                                                                                                                                                               |
| EPI_ISL_960784                                                                                                                                                                                                                                                                                                                                                                                                                                                                                                                                                                                  | Germano de sousa                                                                                          | Instituto Gulbenkian de Ciencia          | João Sobral, Maria Costa, Susana Ladeiro, Cathy Paulino, João Costa, Ricardo Leite                                                                                                                                                                                                                                                                                                                                               |
| EPI_ISL_960786, EPI_ISL_960787                                                                                                                                                                                                                                                                                                                                                                                                                                                                                                                                                                  | Germano de sousa                                                                                          | Instituto Gulbenkian de Ciencia          | Susana Ladeiro, Cathy Paulino, João Costa, João Sobral, Maria Costa, Ricardo Leite                                                                                                                                                                                                                                                                                                                                               |
| EPI_ISL_960790, EPI_ISL_960791                                                                                                                                                                                                                                                                                                                                                                                                                                                                                                                                                                  | Germano de sousa                                                                                          | Instituto Gulbenkian de Ciencia          | Cathy Paulino, João Costa, João Sobral, Maria Costa, Susana Ladeiro, Ricardo Leite                                                                                                                                                                                                                                                                                                                                               |
| EPI_ISL_960793, EPI_ISL_960794, EPI_ISL_960795                                                                                                                                                                                                                                                                                                                                                                                                                                                                                                                                                  | Germano de sousa                                                                                          | Instituto Gulbenkian de Ciencia          | João Costa, João Sobral, Maria Costa, Susana Ladeiro, Cathy Paulino, Ricardo Leite                                                                                                                                                                                                                                                                                                                                               |
| EPI_ISL_960798                                                                                                                                                                                                                                                                                                                                                                                                                                                                                                                                                                                  | Germano de sousa                                                                                          | Instituto Gulbenkian de Ciencia          | Maria Costa, Susana Ladeiro, Cathy Paulino, João Costa, João Sobral, Ricardo Leite                                                                                                                                                                                                                                                                                                                                               |
| EPI_ISL_960800                                                                                                                                                                                                                                                                                                                                                                                                                                                                                                                                                                                  | Germano de sousa                                                                                          | Instituto Gulbenkian de Ciencia          | João Sobral, Maria Costa, Susana Ladeiro, Cathy Paulino, João Costa, Ricardo Leite                                                                                                                                                                                                                                                                                                                                               |
| EPI_ISL_960801, EPI_ISL_960803                                                                                                                                                                                                                                                                                                                                                                                                                                                                                                                                                                  | Germano de sousa                                                                                          | Instituto Gulbenkian de Ciencia          | João Costa, João Sobral, Maria Costa, Susana Ladeiro, Cathy Paulino, Ricardo Leite                                                                                                                                                                                                                                                                                                                                               |
| EPI_ISL_960805, EPI_ISL_960806                                                                                                                                                                                                                                                                                                                                                                                                                                                                                                                                                                  | Germano de sousa                                                                                          | Instituto Gulbenkian de Ciencia          | Susana Ladeiro, Cathy Paulino, João Costa, João Sobral, Maria Costa, Ricardo Leite                                                                                                                                                                                                                                                                                                                                               |
| EPI_ISL_960809, EPI_ISL_960810                                                                                                                                                                                                                                                                                                                                                                                                                                                                                                                                                                  | Germano de sousa                                                                                          | Instituto Gulbenkian de Ciencia          | Maria Costa, Susana Ladeiro, Cathy Paulino, João Costa, João Sobral, Ricardo Leite                                                                                                                                                                                                                                                                                                                                               |
| EPI_ISL_960811                                                                                                                                                                                                                                                                                                                                                                                                                                                                                                                                                                                  | Germano de sousa                                                                                          | Instituto Gulbenkian de Ciencia          | Cathy Paulino, João Costa, João Sobral, Maria Costa, Susana Ladeiro, Ricardo Leite                                                                                                                                                                                                                                                                                                                                               |
| EPI_ISL_960813, EPI_ISL_960814, EPI_ISL_960816                                                                                                                                                                                                                                                                                                                                                                                                                                                                                                                                                  | Germano de sousa                                                                                          | Instituto Gulbenkian de Ciencia          | João Sobral, Maria Costa, Susana Ladeiro, Cathy Paulino, João Costa, Ricardo Leite                                                                                                                                                                                                                                                                                                                                               |
| EPI_ISL_960817, EPI_ISL_960818                                                                                                                                                                                                                                                                                                                                                                                                                                                                                                                                                                  | Germano de sousa                                                                                          | Instituto Gulbenkian de Ciencia          | Maria Costa, Susana Ladeiro, Cathy Paulino, João Costa, João Sobral, Ricardo Leite                                                                                                                                                                                                                                                                                                                                               |
| EPI_ISL_960819, EPI_ISL_960820, EPI_ISL_960822, EPI_ISL_960823                                                                                                                                                                                                                                                                                                                                                                                                                                                                                                                                  | Germano de sousa                                                                                          | Instituto Gulbenkian de Ciencia          | Susana Ladeiro, Cathy Paulino, João Costa, João Sobral, Maria Costa, Ricardo Leite                                                                                                                                                                                                                                                                                                                                               |
| EPI_ISL_960825                                                                                                                                                                                                                                                                                                                                                                                                                                                                                                                                                                                  | Germano de sousa                                                                                          | Instituto Gulbenkian de Ciencia          | João Sobral, Maria Costa, Susana Ladeiro, Cathy Paulino, João Costa, Ricardo Leite                                                                                                                                                                                                                                                                                                                                               |
| EPI_ISL_960826                                                                                                                                                                                                                                                                                                                                                                                                                                                                                                                                                                                  | Germano de sousa                                                                                          | Instituto Gulbenkian de Ciencia          | Maria Costa, Susana Ladeiro, Cathy Paulino, João Costa, João Sobral, Ricardo Leite                                                                                                                                                                                                                                                                                                                                               |
| EPI_ISL_960827, EPI_ISL_960829                                                                                                                                                                                                                                                                                                                                                                                                                                                                                                                                                                  | Germano de sousa                                                                                          | Instituto Gulbenkian de Ciencia          | João Costa, João Sobral, Maria Costa, Susana Ladeiro, Cathy Paulino, Ricardo Leite                                                                                                                                                                                                                                                                                                                                               |
| EPI_ISL_961270                                                                                                                                                                                                                                                                                                                                                                                                                                                                                                                                                                                  | Hospital General Universitario de Alicante - Instituto de Investigación Sanitaria y Biomédica de Alicante | SeqCOVID-SPAIN consortium/IBV(CSIC)      | Maripaz Ventero Martín, Carmen Molina Pardines and SeqCOVID-SPAIN consortium                                                                                                                                                                                                                                                                                                                                                     |
| EPI_ISL_961365, EPI_ISL_961366, EPI_ISL_961367, EPI_ISL_961380                                                                                                                                                                                                                                                                                                                                                                                                                                                                                                                                  | Toronto Invasive Bacterial Diseases Network                                                               | McMaster University                      | Allison McGeer, Patryk Aftanas, Hooman Derakhshani, Angel Li, Kuganya Nirmalarajah, Emily Panousis, Ahmed Draia, Jalees Nasir, Michael Surette, Samira Mubareka, Andrew G. McArthur                                                                                                                                                                                                                                              |
| EPI_ISL_961607, EPI_ISL_961608, EPI_ISL_961661, EPI_ISL_961663, EPI_ISL_961664, EPI_ISL_961665, EPI_ISL_961666                                                                                                                                                                                                                                                                                                                                                                                                                                                                                  | Hôpital Georges L. Dumont                                                                                 | National Microbiology Laboratory (NML)   | Anna Majer, Shari Tyson, Grace Seo, Philip Mabon, Elsie Grudeski, Rhiannon Huzarewich, Russell Mandes, Anneliese Landgraff, Jennifer Tanner, Natalie Knox, Morag Graham, Gary Van Domselaar, Richard Garceau, Guillaume Desnoyers, Nathalie Bastien, Yan Li, Timothy Booth, Darian Hole, Madison Chapel, Kirsten Biggar, CanCOGeN's metadata curation team, Public Health Agency of Canada CanCOGeN team                         |
| EPI_ISL_962013, EPI_ISL_962015, EPI_ISL_962067, EPI_ISL_962068, EPI_ISL_962070, EPI_ISL_962071, EPI_ISL_962072, EPI_ISL_962073, EPI_ISL_962077, EPI_ISL_962078, EPI_ISL_962085, EPI_ISL_962086, EPI_ISL_962087, EPI_ISL_962092, EPI_ISL_962093, EPI_ISL_962094, EPI_ISL_962095, EPI_ISL_962097, EPI_ISL_962100, EPI_ISL_962109, EPI_ISL_962110, EPI_ISL_962111, EPI_ISL_962114, EPI_ISL_962115, EPI_ISL_962119, EPI_ISL_962124, EPI_ISL_962128, EPI_ISL_962158                                                                                                                                  |                                                                                                           |                                          |                                                                                                                                                                                                                                                                                                                                                                                                                                  |
| see above                                                                                                                                                                                                                                                                                                                                                                                                                                                                                                                                                                                       | Illinois Department of Public Health                                                                      | Gagnon Lab, Southern Illinois University | Keith Gagnon                                                                                                                                                                                                                                                                                                                                                                                                                     |
| EPI_ISL_962506, EPI_ISL_962508                                                                                                                                                                                                                                                                                                                                                                                                                                                                                                                                                                  | UCLA Clinical Micro Lab                                                                                   | Los Angeles County PHL                   | P. Hemarajata et al.                                                                                                                                                                                                                                                                                                                                                                                                             |
| EPI_ISL_962612, EPI_ISL_962613, EPI_ISL_962766, EPI_ISL_962767, EPI_ISL_962768, EPI_ISL_962769, EPI_ISL_962770, EPI_ISL_962776, EPI_ISL_962777, EPI_ISL_962779, EPI_ISL_962783, EPI_ISL_962784, EPI_ISL_962786, EPI_ISL_962787, EPI_ISL_962788, EPI_ISL_962790, EPI_ISL_962791, EPI_ISL_962792, EPI_ISL_962793, EPI_ISL_962795, EPI_ISL_962797, EPI_ISL_962799, EPI_ISL_962800, EPI_ISL_962801, EPI_ISL_962802, EPI_ISL_962803, EPI_ISL_962805, EPI_ISL_962806, EPI_ISL_962809, EPI_ISL_962810                                                                                                  |                                                                                                           |                                          |                                                                                                                                                                                                                                                                                                                                                                                                                                  |
| see above                                                                                                                                                                                                                                                                                                                                                                                                                                                                                                                                                                                       | San Diego County Public Health Laboratory                                                                 | Andersen lab at Scripps Research         | SEARCH Alliance San Diego with Tracy Basler, Jovan Shephard, Brett Austin                                                                                                                                                                                                                                                                                                                                                        |
| EPI_ISL_965056, EPI_ISL_965058, EPI_ISL_965062, EPI_ISL_965063, EPI_ISL_965065                                                                                                                                                                                                                                                                                                                                                                                                                                                                                                                  | Wyoming Public Health Laboratory                                                                          | Wyoming Public Health Laboratory         | Noah Hull, Taylor Fearing, Lynette Gumbleton, Channing Weber, Ashley Norberg, Bailey Bowcutt, and Wanda Manley                                                                                                                                                                                                                                                                                                                   |
| EPI_ISL_978994, EPI_ISL_978999, EPI_ISL_979000, EPI_ISL_979001, EPI_ISL_979003, EPI_ISL_979011, EPI_ISL_979020, EPI_ISL_979021, EPI_ISL_979022, EPI_ISL_979026, EPI_ISL_979027, EPI_ISL_979032, EPI_ISL_979034, EPI_ISL_979038, EPI_ISL_979042, EPI_ISL_979044, EPI_ISL_979048, EPI_ISL_979049, EPI_ISL_979051                                                                                                                                                                                                                                                                                  |                                                                                                           |                                          |                                                                                                                                                                                                                                                                                                                                                                                                                                  |
| see above                                                                                                                                                                                                                                                                                                                                                                                                                                                                                                                                                                                       | Santa Clara County Public Health Laboratory                                                               | Chan-Zuckerberg Biohub                   | CZB Cliahub Consortium                                                                                                                                                                                                                                                                                                                                                                                                           |
| EPI_ISL_979170, EPI_ISL_979171, EPI_ISL_979176, EPI_ISL_979183, EPI_ISL_979193, EPI_ISL_979194, EPI_ISL_979197, EPI_ISL_979211, EPI_ISL_979215, EPI_ISL_979217, EPI_ISL_979218, EPI_ISL_979223, EPI_ISL_979228, EPI_ISL_979229, EPI_ISL_979235                                                                                                                                                                                                                                                                                                                                                  |                                                                                                           |                                          |                                                                                                                                                                                                                                                                                                                                                                                                                                  |
| see above                                                                                                                                                                                                                                                                                                                                                                                                                                                                                                                                                                                       | Humboldt County Public Health Laboratory                                                                  | Chan-Zuckerberg Biohub                   | CZB Cliahub Consortium                                                                                                                                                                                                                                                                                                                                                                                                           |
| EPI_ISL_979294, EPI_ISL_979295, EPI_ISL_979296, EPI_ISL_979298, EPI_ISL_979299, EPI_ISL_979300, EPI_ISL_979301, EPI_ISL_979302, EPI_ISL_979303, EPI_ISL_979304, EPI_ISL_979305, EPI_ISL_979307, EPI_ISL_979308, EPI_ISL_979309                                                                                                                                                                                                                                                                                                                                                                  |                                                                                                           |                                          |                                                                                                                                                                                                                                                                                                                                                                                                                                  |
| see above                                                                                                                                                                                                                                                                                                                                                                                                                                                                                                                                                                                       | Cadham Provincial laboratory                                                                              | National Microbiology Laboratory (NML)   | Anna Majer, Shari Tyson, Grace Seo, Philip Mabon, Elsie Grudeski, Rhiannon Huzarewich, Russell Mandes, Anneliese Landgraff, Jennifer Tanner, Natalie Knox, Morag Graham, Gary Van Domselaar, Paul Van Caesele, Jared Bullard, David Alexander, Kerry Dust, Nathalie Bastien, Yan Li, Timothy Booth, Darian Hole, Madison Chapel, Kirsten Biggar, CanCOGeN's metadata curation team, Public Health Agency of Canada CanCOGeN team |
| EPI_ISL_979546, EPI_ISL_979547, EPI_ISL_979548, EPI_ISL_979565, EPI_ISL_979566, EPI_ISL_979577, EPI_ISL_979578, EPI_ISL_979583, EPI_ISL_979585, EPI_ISL_979586, EPI_ISL_979587, EPI_ISL_979588, EPI_ISL_979589, EPI_ISL_979592, EPI_ISL_979595, EPI_ISL_979600, EPI_ISL_979604, EPI_ISL_979609, EPI_ISL_979619, EPI_ISL_979621, EPI_ISL_979622, EPI_ISL_979628, EPI_ISL_979629, EPI_ISL_979633                                                                                                                                                                                                  |                                                                                                           |                                          |                                                                                                                                                                                                                                                                                                                                                                                                                                  |
| see above                                                                                                                                                                                                                                                                                                                                                                                                                                                                                                                                                                                       | Santa Clara County Public Health Laboratory                                                               | Chan-Zuckerberg Biohub                   | CZB Cliahub Consortium                                                                                                                                                                                                                                                                                                                                                                                                           |
| EPI_ISL_979644, EPI_ISL_979646, EPI_ISL_979656, EPI_ISL_979658, EPI_ISL_979659, EPI_ISL_979662, EPI_ISL_979669, EPI_ISL_979673, EPI_ISL_979691                                                                                                                                                                                                                                                                                                                                                                                                                                                  | Orange County Public Health Lab                                                                           | Chan-Zuckerberg Biohub                   | CZB Cliahub Consortium                                                                                                                                                                                                                                                                                                                                                                                                           |
| EPI_ISL_979712, EPI_ISL_979713, EPI_ISL_979720, EPI_ISL_979721, EPI_ISL_979722, EPI_ISL_979724, EPI_ISL_979725, EPI_ISL_979726, EPI_ISL_979732, EPI_ISL_979735, EPI_ISL_979736, EPI_ISL_979739, EPI_ISL_979740, EPI_ISL_979742, EPI_ISL_979743, EPI_ISL_979745, EPI_ISL_979746, EPI_ISL_979749, EPI_ISL_979750, EPI_ISL_979751, EPI_ISL_979752, EPI_ISL_979754, EPI_ISL_979760, EPI_ISL_979762, EPI_ISL_979767, EPI_ISL_979768, EPI_ISL_979769, EPI_ISL_979772, EPI_ISL_979773, EPI_ISL_979774, EPI_ISL_979775, EPI_ISL_979777, EPI_ISL_979779, EPI_ISL_979787, EPI_ISL_979789, EPI_ISL_979791, |                                                                                                           |                                          |                                                                                                                                                                                                                                                                                                                                                                                                                                  |

|                                                                                                                                                                                                                                                                                                                                                                                                                                                                                                                                                                                                                                                                                                                                                                                                                                                                                                                                                                                                                                                                                                                                                                                                                                                                                                                                                                                                                                                                                                |                                                                                                                           |                                                                                                                                                                                                                                                                                                                                                                                                                                                                  |                                                                                                                                                                                                                                                                                                             |
|------------------------------------------------------------------------------------------------------------------------------------------------------------------------------------------------------------------------------------------------------------------------------------------------------------------------------------------------------------------------------------------------------------------------------------------------------------------------------------------------------------------------------------------------------------------------------------------------------------------------------------------------------------------------------------------------------------------------------------------------------------------------------------------------------------------------------------------------------------------------------------------------------------------------------------------------------------------------------------------------------------------------------------------------------------------------------------------------------------------------------------------------------------------------------------------------------------------------------------------------------------------------------------------------------------------------------------------------------------------------------------------------------------------------------------------------------------------------------------------------|---------------------------------------------------------------------------------------------------------------------------|------------------------------------------------------------------------------------------------------------------------------------------------------------------------------------------------------------------------------------------------------------------------------------------------------------------------------------------------------------------------------------------------------------------------------------------------------------------|-------------------------------------------------------------------------------------------------------------------------------------------------------------------------------------------------------------------------------------------------------------------------------------------------------------|
| EPI_ISL_979792                                                                                                                                                                                                                                                                                                                                                                                                                                                                                                                                                                                                                                                                                                                                                                                                                                                                                                                                                                                                                                                                                                                                                                                                                                                                                                                                                                                                                                                                                 |                                                                                                                           |                                                                                                                                                                                                                                                                                                                                                                                                                                                                  |                                                                                                                                                                                                                                                                                                             |
| see above                                                                                                                                                                                                                                                                                                                                                                                                                                                                                                                                                                                                                                                                                                                                                                                                                                                                                                                                                                                                                                                                                                                                                                                                                                                                                                                                                                                                                                                                                      | Humboldt County Public Health Laboratory                                                                                  | Chan-Zuckerberg Biohub                                                                                                                                                                                                                                                                                                                                                                                                                                           | CZB Cliahub Consortium                                                                                                                                                                                                                                                                                      |
| EPI_ISL_980974                                                                                                                                                                                                                                                                                                                                                                                                                                                                                                                                                                                                                                                                                                                                                                                                                                                                                                                                                                                                                                                                                                                                                                                                                                                                                                                                                                                                                                                                                 | Innovative Genomics Institute, UC Berkeley                                                                                | Innovative Genomics Institute, UC Berkeley                                                                                                                                                                                                                                                                                                                                                                                                                       | Stacia Wyman, Haridha Shivram, Phil Frankino, Liana Lareau                                                                                                                                                                                                                                                  |
| EPI_ISL_981006                                                                                                                                                                                                                                                                                                                                                                                                                                                                                                                                                                                                                                                                                                                                                                                                                                                                                                                                                                                                                                                                                                                                                                                                                                                                                                                                                                                                                                                                                 | AZ Klna                                                                                                                   | AZ Klna                                                                                                                                                                                                                                                                                                                                                                                                                                                          | Dr. C. Vael                                                                                                                                                                                                                                                                                                 |
| EPI_ISL_981061, EPI_ISL_981062                                                                                                                                                                                                                                                                                                                                                                                                                                                                                                                                                                                                                                                                                                                                                                                                                                                                                                                                                                                                                                                                                                                                                                                                                                                                                                                                                                                                                                                                 | Johns Hopkins Hospital Department of Pathology                                                                            | Johns Hopkins Hospital Department of Pathology                                                                                                                                                                                                                                                                                                                                                                                                                   | C. Paul Morris, Chun Huai Luo, Adannaya Amadi, Matthew Schwartz, Nicholas Gallagher, Heba H. Mostafa                                                                                                                                                                                                        |
| EPI_ISL_981850, EPI_ISL_981851, EPI_ISL_981852, EPI_ISL_981853, EPI_ISL_981854, EPI_ISL_981855, EPI_ISL_981858, EPI_ISL_981859, EPI_ISL_981860, EPI_ISL_981861, EPI_ISL_981862, EPI_ISL_981863, EPI_ISL_981864, EPI_ISL_981865, EPI_ISL_981866, EPI_ISL_981867, EPI_ISL_981869, EPI_ISL_981870, EPI_ISL_981873, EPI_ISL_981874, EPI_ISL_981875, EPI_ISL_981876, EPI_ISL_981879, EPI_ISL_981880, EPI_ISL_981881, EPI_ISL_981882, EPI_ISL_981884, EPI_ISL_981885, EPI_ISL_981886, EPI_ISL_981889, EPI_ISL_981891, EPI_ISL_981892, EPI_ISL_981893, EPI_ISL_981894, EPI_ISL_981895, EPI_ISL_981896, EPI_ISL_981897, EPI_ISL_981898, EPI_ISL_981899, EPI_ISL_981901, EPI_ISL_981902, EPI_ISL_981905, EPI_ISL_981906, EPI_ISL_981907, EPI_ISL_981908, EPI_ISL_981909, EPI_ISL_981910, EPI_ISL_981913, EPI_ISL_981914, EPI_ISL_981915, EPI_ISL_981918, EPI_ISL_981921, EPI_ISL_981922, EPI_ISL_981924, EPI_ISL_981926, EPI_ISL_981927, EPI_ISL_981928, EPI_ISL_981929, EPI_ISL_981930, EPI_ISL_981931, EPI_ISL_981932, EPI_ISL_981935, EPI_ISL_981936, EPI_ISL_981937, EPI_ISL_981938, EPI_ISL_981942, EPI_ISL_981943, EPI_ISL_981944, EPI_ISL_981954, EPI_ISL_981955                                                                                                                                                                                                                                                                                                                                 |                                                                                                                           |                                                                                                                                                                                                                                                                                                                                                                                                                                                                  |                                                                                                                                                                                                                                                                                                             |
| see above                                                                                                                                                                                                                                                                                                                                                                                                                                                                                                                                                                                                                                                                                                                                                                                                                                                                                                                                                                                                                                                                                                                                                                                                                                                                                                                                                                                                                                                                                      | Microbiology Service, Hospital Universitario Clínico San Cecilio, Granada                                                 | Microbiology Service, Hospital Universitario Clínico San Cecilio, Granada                                                                                                                                                                                                                                                                                                                                                                                        | Adolfo de Salazar, Natalia Chueca, Laura Viñuela, Ana Fuentes, Federico García                                                                                                                                                                                                                              |
| EPI_ISL_982173, EPI_ISL_982185, EPI_ISL_982186, EPI_ISL_982187, EPI_ISL_982188, EPI_ISL_982189, EPI_ISL_982190, EPI_ISL_982192, EPI_ISL_982195, EPI_ISL_982198, EPI_ISL_982199                                                                                                                                                                                                                                                                                                                                                                                                                                                                                                                                                                                                                                                                                                                                                                                                                                                                                                                                                                                                                                                                                                                                                                                                                                                                                                                 |                                                                                                                           |                                                                                                                                                                                                                                                                                                                                                                                                                                                                  |                                                                                                                                                                                                                                                                                                             |
| see above                                                                                                                                                                                                                                                                                                                                                                                                                                                                                                                                                                                                                                                                                                                                                                                                                                                                                                                                                                                                                                                                                                                                                                                                                                                                                                                                                                                                                                                                                      | Hôpital Henri Mondor                                                                                                      | Department of Virology, Henri Mondor University Hospital, Assistance Publique Hôpitaux de Paris, Université Paris-Est Créteil, INSERM U955                                                                                                                                                                                                                                                                                                                       | Christophe Rodriguez, Slim Fourati, Vanessa Demontant, Guillaume Gricourt, Melissa N'Debi, Alexandre Soulier, Elisabeth Trawinski, Jean-Michel Pawlotsky                                                                                                                                                    |
| EPI_ISL_982231                                                                                                                                                                                                                                                                                                                                                                                                                                                                                                                                                                                                                                                                                                                                                                                                                                                                                                                                                                                                                                                                                                                                                                                                                                                                                                                                                                                                                                                                                 | MEPHI, Aix Marseille University                                                                                           | MEPHI, Aix Marseille University                                                                                                                                                                                                                                                                                                                                                                                                                                  | Anthony LEVASSEUR                                                                                                                                                                                                                                                                                           |
| EPI_ISL_982239                                                                                                                                                                                                                                                                                                                                                                                                                                                                                                                                                                                                                                                                                                                                                                                                                                                                                                                                                                                                                                                                                                                                                                                                                                                                                                                                                                                                                                                                                 | Lab voor klinische biologie                                                                                               | Lab voor klinische biologie                                                                                                                                                                                                                                                                                                                                                                                                                                      | Hannelore Hamerlinck, Marija Janevska, Bruno Verhasselt                                                                                                                                                                                                                                                     |
| EPI_ISL_982321, EPI_ISL_982324, EPI_ISL_982325, EPI_ISL_982326, EPI_ISL_982327, EPI_ISL_982329, EPI_ISL_982330, EPI_ISL_982331, EPI_ISL_982332, EPI_ISL_982333, EPI_ISL_982334, EPI_ISL_982337, EPI_ISL_982339, EPI_ISL_982340, EPI_ISL_982341, EPI_ISL_982342, EPI_ISL_982343                                                                                                                                                                                                                                                                                                                                                                                                                                                                                                                                                                                                                                                                                                                                                                                                                                                                                                                                                                                                                                                                                                                                                                                                                 |                                                                                                                           |                                                                                                                                                                                                                                                                                                                                                                                                                                                                  |                                                                                                                                                                                                                                                                                                             |
| see above                                                                                                                                                                                                                                                                                                                                                                                                                                                                                                                                                                                                                                                                                                                                                                                                                                                                                                                                                                                                                                                                                                                                                                                                                                                                                                                                                                                                                                                                                      | Hôpital Henri Mondor                                                                                                      | Department of Virology, Henri Mondor University Hospital, Assistance Publique Hôpitaux de Paris, Université Paris-Est Créteil, INSERM U955                                                                                                                                                                                                                                                                                                                       | Christophe Rodriguez, Slim Fourati, Vanessa Demontant, Guillaume Gricourt, Melissa N'Debi, Alexandre Soulier, Elisabeth Trawinski, Jean-Michel Pawlotsky                                                                                                                                                    |
| EPI_ISL_982442                                                                                                                                                                                                                                                                                                                                                                                                                                                                                                                                                                                                                                                                                                                                                                                                                                                                                                                                                                                                                                                                                                                                                                                                                                                                                                                                                                                                                                                                                 | MONTEFIORE MEDICAL CENTER LABORATORIES                                                                                    | Wadsworth Center, New York State Department of Health                                                                                                                                                                                                                                                                                                                                                                                                            | Kirsten St. George, Daryl M. Lamson, Alexis Russel, Matthew Shudt, Melissa A Leisner, Jonathan Plitnick, Navjot Singh, John Kelly, Erasmus Schneider, Erica Lasek-Nesselquist                                                                                                                               |
| EPI_ISL_982777, EPI_ISL_982843                                                                                                                                                                                                                                                                                                                                                                                                                                                                                                                                                                                                                                                                                                                                                                                                                                                                                                                                                                                                                                                                                                                                                                                                                                                                                                                                                                                                                                                                 | Kentucky State Public Health Lab                                                                                          | Kentucky State Public Health Lab                                                                                                                                                                                                                                                                                                                                                                                                                                 | Stephanie Lunn, Karim George, Joshua Tobias, William Grooms, Vaneet Arora, Matthew Johnson, Rachel Zinner, Rhonda Lucas                                                                                                                                                                                     |
| EPI_ISL_983323                                                                                                                                                                                                                                                                                                                                                                                                                                                                                                                                                                                                                                                                                                                                                                                                                                                                                                                                                                                                                                                                                                                                                                                                                                                                                                                                                                                                                                                                                 | INMI Lazzaro Spallanzani IRCCS                                                                                            | INMI Lazzaro Spallanzani IRCCS                                                                                                                                                                                                                                                                                                                                                                                                                                   | CEM Gruber, B Bartolini, E Giombini, M Rueca, O Butera, F Messina, A Di Caro, MR Capobianchi                                                                                                                                                                                                                |
| EPI_ISL_983408                                                                                                                                                                                                                                                                                                                                                                                                                                                                                                                                                                                                                                                                                                                                                                                                                                                                                                                                                                                                                                                                                                                                                                                                                                                                                                                                                                                                                                                                                 | Utah Public Health Laboratory                                                                                             | Utah Public Health Laboratory                                                                                                                                                                                                                                                                                                                                                                                                                                    | Erin L. Young, Kelly F. Oakeson, Tara Gallagher                                                                                                                                                                                                                                                             |
| EPI_ISL_983836, EPI_ISL_983839, EPI_ISL_983840, EPI_ISL_983841, EPI_ISL_983842, EPI_ISL_983844, EPI_ISL_983845, EPI_ISL_983846, EPI_ISL_983847, EPI_ISL_983848, EPI_ISL_983849, EPI_ISL_983852, EPI_ISL_983853, EPI_ISL_983856, EPI_ISL_983857, EPI_ISL_983858, EPI_ISL_983859, EPI_ISL_983862                                                                                                                                                                                                                                                                                                                                                                                                                                                                                                                                                                                                                                                                                                                                                                                                                                                                                                                                                                                                                                                                                                                                                                                                 |                                                                                                                           |                                                                                                                                                                                                                                                                                                                                                                                                                                                                  |                                                                                                                                                                                                                                                                                                             |
| see above                                                                                                                                                                                                                                                                                                                                                                                                                                                                                                                                                                                                                                                                                                                                                                                                                                                                                                                                                                                                                                                                                                                                                                                                                                                                                                                                                                                                                                                                                      | Colorado Department of Public Health and Environment                                                                      | Colorado Department of Public Health and Environment                                                                                                                                                                                                                                                                                                                                                                                                             | Laura Bankers, Molly C. Hetherington-Rauth, Diana Ir, Shannon Ely, Shannon R. Matzinger, Sarah Elizabeth Totten, Emily A. Travanty                                                                                                                                                                          |
| EPI_ISL_983874, EPI_ISL_983875, EPI_ISL_983876, EPI_ISL_983877, EPI_ISL_983890, EPI_ISL_983893, EPI_ISL_983894, EPI_ISL_983898, EPI_ISL_983900, EPI_ISL_983903, EPI_ISL_983917, EPI_ISL_983918, EPI_ISL_983919, EPI_ISL_983920, EPI_ISL_983921, EPI_ISL_983923, EPI_ISL_983924, EPI_ISL_983925, EPI_ISL_983926, EPI_ISL_983927, EPI_ISL_983928, EPI_ISL_983929, EPI_ISL_983930, EPI_ISL_983931, EPI_ISL_983932, EPI_ISL_983933, EPI_ISL_983934, EPI_ISL_983936, EPI_ISL_983937, EPI_ISL_983938, EPI_ISL_983939, EPI_ISL_983940, EPI_ISL_983941, EPI_ISL_983942, EPI_ISL_983943, EPI_ISL_983944, EPI_ISL_983945, EPI_ISL_983946, EPI_ISL_983947, EPI_ISL_983948, EPI_ISL_983950, EPI_ISL_983951, EPI_ISL_983953, EPI_ISL_983954, EPI_ISL_983958, EPI_ISL_983961, EPI_ISL_983962, EPI_ISL_983963, EPI_ISL_983964, EPI_ISL_983965, EPI_ISL_983966, EPI_ISL_983967, EPI_ISL_983968, EPI_ISL_983970, EPI_ISL_983971, EPI_ISL_983972, EPI_ISL_983973, EPI_ISL_983974, EPI_ISL_983975, EPI_ISL_983976, EPI_ISL_983977, EPI_ISL_984073, EPI_ISL_984088, EPI_ISL_984089, EPI_ISL_984090, EPI_ISL_984091, EPI_ISL_984121, EPI_ISL_984122, EPI_ISL_984123, EPI_ISL_984124, EPI_ISL_984125                                                                                                                                                                                                                                                                                                                 |                                                                                                                           |                                                                                                                                                                                                                                                                                                                                                                                                                                                                  |                                                                                                                                                                                                                                                                                                             |
| see above                                                                                                                                                                                                                                                                                                                                                                                                                                                                                                                                                                                                                                                                                                                                                                                                                                                                                                                                                                                                                                                                                                                                                                                                                                                                                                                                                                                                                                                                                      | Wisconsin State Laboratory of Hygiene Communicable Disease Division                                                       | Wisconsin State Laboratory of Hygiene Communicable Disease Division                                                                                                                                                                                                                                                                                                                                                                                              | Kelsey R. Florek, Abigail C. Shockey                                                                                                                                                                                                                                                                        |
| EPI_ISL_984439, EPI_ISL_984442, EPI_ISL_984587, EPI_ISL_984588, EPI_ISL_984590, EPI_ISL_984591, EPI_ISL_984592, EPI_ISL_984593, EPI_ISL_984595, EPI_ISL_984596, EPI_ISL_984598, EPI_ISL_984599, EPI_ISL_984600, EPI_ISL_984601, EPI_ISL_984603, EPI_ISL_984604, EPI_ISL_984605, EPI_ISL_984607, EPI_ISL_984608, EPI_ISL_984611, EPI_ISL_984612                                                                                                                                                                                                                                                                                                                                                                                                                                                                                                                                                                                                                                                                                                                                                                                                                                                                                                                                                                                                                                                                                                                                                 |                                                                                                                           |                                                                                                                                                                                                                                                                                                                                                                                                                                                                  |                                                                                                                                                                                                                                                                                                             |
| see above                                                                                                                                                                                                                                                                                                                                                                                                                                                                                                                                                                                                                                                                                                                                                                                                                                                                                                                                                                                                                                                                                                                                                                                                                                                                                                                                                                                                                                                                                      | California Department of Public Health                                                                                    | Chiu Laboratory, University of California, San Francisco                                                                                                                                                                                                                                                                                                                                                                                                         | Charles Chiu, Xianding (Wayne) Deng, Candace Wang, Venice Servellita, Jill Hacker, Debra Wadford                                                                                                                                                                                                            |
| EPI_ISL_984629, EPI_ISL_984630, EPI_ISL_984631, EPI_ISL_984632, EPI_ISL_984635, EPI_ISL_984639, EPI_ISL_984642, EPI_ISL_984646, EPI_ISL_984649, EPI_ISL_984650, EPI_ISL_984652, EPI_ISL_984653, EPI_ISL_984654, EPI_ISL_984655, EPI_ISL_984656, EPI_ISL_984657, EPI_ISL_984658                                                                                                                                                                                                                                                                                                                                                                                                                                                                                                                                                                                                                                                                                                                                                                                                                                                                                                                                                                                                                                                                                                                                                                                                                 |                                                                                                                           |                                                                                                                                                                                                                                                                                                                                                                                                                                                                  |                                                                                                                                                                                                                                                                                                             |
| see above                                                                                                                                                                                                                                                                                                                                                                                                                                                                                                                                                                                                                                                                                                                                                                                                                                                                                                                                                                                                                                                                                                                                                                                                                                                                                                                                                                                                                                                                                      | Laboratory of Virology of Federal Budget Health Care Institution Center of Hygiene and Epidemiology in Arkhangelsk region | Group of Genomics and Postgenomic Technologies of Central Research Institute of Epidemiology                                                                                                                                                                                                                                                                                                                                                                     | Samoilov AE, Kapteleva VV, Korneenko EV, Valdokhina AV, Bulanenko VP, Saenko SS, Semyina LV,Ponomareva YA,Shishko LA, Speranskaya AS, Tivanova EV, Kondrasheva LV, Akimkin VG                                                                                                                               |
| EPI_ISL_984757, EPI_ISL_984762, EPI_ISL_984770, EPI_ISL_984771, EPI_ISL_984772, EPI_ISL_984773, EPI_ISL_984774, EPI_ISL_984775, EPI_ISL_984776, EPI_ISL_984777, EPI_ISL_984778, EPI_ISL_984779, EPI_ISL_984780, EPI_ISL_984781, EPI_ISL_984782, EPI_ISL_984783, EPI_ISL_984784, EPI_ISL_984785, EPI_ISL_984786, EPI_ISL_984787, EPI_ISL_984788, EPI_ISL_984789, EPI_ISL_984790, EPI_ISL_984791, EPI_ISL_984792, EPI_ISL_984793, EPI_ISL_984794, EPI_ISL_984795, EPI_ISL_984796, EPI_ISL_984797, EPI_ISL_984798, EPI_ISL_984799, EPI_ISL_984801, EPI_ISL_984802, EPI_ISL_984803, EPI_ISL_984805, EPI_ISL_984806, EPI_ISL_984811, EPI_ISL_984812, EPI_ISL_984813, EPI_ISL_984815, EPI_ISL_984816, EPI_ISL_984817, EPI_ISL_984818, EPI_ISL_984819, EPI_ISL_984820, EPI_ISL_984821, EPI_ISL_984822, EPI_ISL_984823, EPI_ISL_984824, EPI_ISL_984826, EPI_ISL_984827, EPI_ISL_984828, EPI_ISL_984829, EPI_ISL_984830, EPI_ISL_984831, EPI_ISL_984832, EPI_ISL_984834, EPI_ISL_984835, EPI_ISL_984836, EPI_ISL_984838, EPI_ISL_984839, EPI_ISL_984840, EPI_ISL_984841, EPI_ISL_984842, EPI_ISL_984843, EPI_ISL_984845, EPI_ISL_984846, EPI_ISL_984847, EPI_ISL_984848, EPI_ISL_984849, EPI_ISL_984850, EPI_ISL_984851, EPI_ISL_984852, EPI_ISL_984853, EPI_ISL_984854, EPI_ISL_984855, EPI_ISL_984856, EPI_ISL_984857, EPI_ISL_984858, EPI_ISL_984859, EPI_ISL_984860, EPI_ISL_984861, EPI_ISL_984862, EPI_ISL_984863, EPI_ISL_984864, EPI_ISL_984865, EPI_ISL_984866, EPI_ISL_984867, EPI_ISL_984868 |                                                                                                                           |                                                                                                                                                                                                                                                                                                                                                                                                                                                                  |                                                                                                                                                                                                                                                                                                             |
| see above                                                                                                                                                                                                                                                                                                                                                                                                                                                                                                                                                                                                                                                                                                                                                                                                                                                                                                                                                                                                                                                                                                                                                                                                                                                                                                                                                                                                                                                                                      | Pandemic Response Lab - NYC                                                                                               | Pandemic Response Lab, R&D                                                                                                                                                                                                                                                                                                                                                                                                                                       | Henry Lee, Michael Hammerling, Melissa Hopkins, Cybill del Castillo, William Ward, Pradeep Bugga, Haiping Hao, Jon Laurent                                                                                                                                                                                  |
| EPI_ISL_985158, EPI_ISL_985159, EPI_ISL_985160, EPI_ISL_985161, EPI_ISL_985162, EPI_ISL_985163, EPI_ISL_985165, EPI_ISL_985166, EPI_ISL_985167                                                                                                                                                                                                                                                                                                                                                                                                                                                                                                                                                                                                                                                                                                                                                                                                                                                                                                                                                                                                                                                                                                                                                                                                                                                                                                                                                 | Instituto Nacional de Medicina Genomica                                                                                   | Instituto Nacional de Medicina Genomica                                                                                                                                                                                                                                                                                                                                                                                                                          | Hidalgo-Miranda A, Mendoza-Vargas A, Reyes-Grageda JP, Cisneros-Villanueva M, Cedro-Tanda A,Peñaloza-Figueroa F, Herrera-Montalvo LA                                                                                                                                                                        |
| EPI_ISL_985398                                                                                                                                                                                                                                                                                                                                                                                                                                                                                                                                                                                                                                                                                                                                                                                                                                                                                                                                                                                                                                                                                                                                                                                                                                                                                                                                                                                                                                                                                 | RSA UGM                                                                                                                   | Genetics Working Group (Pokja Genetik) Faculty of Medicine, Public Health and Nursing Universitas Gadjah Mada (FK-KMK UGM); Disease Investigation Center Wates Ministry of Agriculture Indonesia; Department of Microbiology FK-KMK UGM; Laboratorium Diagnostik Yayasan Tahija World Mosquito Program (WMP) Yogyakarta Center for Tropical Medicine FK-KMK UGM; Integrated Research center FK-KMK UGM; Department of Computer Science and Electronics FMIPA UGM | Gunadi, Hendra Wibawa, Marcellus, Mohamad S. Hakim, Edwin W. Daniwijaya, Ludhang P. Rizki, Endah Supriyati, Eggi Arguni, Titik Nuryastuti, Tri Wibawa, Dwi AA Nugrahaningsih, Afiahayati, Siswanto, Kristy Iskandar, Nungki Anggorowati, Susan Simanjaya, Maria Patricia Inggriani                          |
| EPI_ISL_989983, EPI_ISL_989986, EPI_ISL_989989, EPI_ISL_989992, EPI_ISL_989994, EPI_ISL_989996                                                                                                                                                                                                                                                                                                                                                                                                                                                                                                                                                                                                                                                                                                                                                                                                                                                                                                                                                                                                                                                                                                                                                                                                                                                                                                                                                                                                 | Lighthouse Lab in Glasgow                                                                                                 | Wellcome Sanger Institute for the COVID-19 Genomics UK (COG-UK) Consortium                                                                                                                                                                                                                                                                                                                                                                                       | Harper VanSteenhouse, Yumi Kasai, David Gray, Carol Clugston, Anna Dominiczak and Alex Alderton, Roberto Amato, Sonia Goncalves, Ewan Harrison, David K. Jackson, Ian Johnston, Dominic Kwiatkowski, Cordella Langford, John Sillitoe on behalf of the Wellcome Sanger Institute COVID-19 Surveillance Team |
| EPI_ISL_992956                                                                                                                                                                                                                                                                                                                                                                                                                                                                                                                                                                                                                                                                                                                                                                                                                                                                                                                                                                                                                                                                                                                                                                                                                                                                                                                                                                                                                                                                                 | Laboratorio de Virología HUCA                                                                                             | Laboratorio de Virología Hospital Universitario Central de Asturias (HUCA)                                                                                                                                                                                                                                                                                                                                                                                       | Sandoval M, Castelló C, Gómez de Oña J, Boga JA, Rojo S, Alvarez-Arguelles ME, Abreu F, Costales I, Perez-Martínez Z, Martín-Rodríguez G, Coto E, Melón S                                                                                                                                                   |
| EPI_ISL_993630                                                                                                                                                                                                                                                                                                                                                                                                                                                                                                                                                                                                                                                                                                                                                                                                                                                                                                                                                                                                                                                                                                                                                                                                                                                                                                                                                                                                                                                                                 | Hospital San Agustín                                                                                                      | Laboratorio de Virología Hospital Universitario Central de Asturias (HUCA)                                                                                                                                                                                                                                                                                                                                                                                       | Sandoval M, Castelló C, Gómez de Oña J, Boga JA, Rojo S, Alvarez-Arguelles ME, Abreu F, Costales I, Perez-Martínez Z, Martín-Rodríguez G, Coto E, Melón S                                                                                                                                                   |
| EPI_ISL_994669, EPI_ISL_994670, EPI_ISL_994671, EPI_ISL_994672, EPI_ISL_994673, EPI_ISL_994675, EPI_ISL_994681, EPI_ISL_994683, EPI_ISL_994684, EPI_ISL_994685, EPI_ISL_994686, EPI_ISL_994687, EPI_ISL_994688, EPI_ISL_994689, EPI_ISL_994690, EPI_ISL_994691, EPI_ISL_994692, EPI_ISL_994693, EPI_ISL_994694, EPI_ISL_994703, EPI_ISL_994705, EPI_ISL_994706, EPI_ISL_994707, EPI_ISL_994708, EPI_ISL_994709, EPI_ISL_994710, EPI_ISL_994712, EPI_ISL_994713, EPI_ISL_994714, EPI_ISL_994715, EPI_ISL_994716, EPI_ISL_994717, EPI_ISL_994718, EPI_ISL_994719, EPI_ISL_994720, EPI_ISL_994721,                                                                                                                                                                                                                                                                                                                                                                                                                                                                                                                                                                                                                                                                                                                                                                                                                                                                                                |                                                                                                                           |                                                                                                                                                                                                                                                                                                                                                                                                                                                                  |                                                                                                                                                                                                                                                                                                             |

|                                                                                                                                                                                                                                                                                                                                                                                                                                                                                                                                                                                                                                                                                                                                                                                                                                                                                                                                                |                                                                                                                                                                                                                     |                                                                                                                                        |                                                                                                                                                                                                                                                                                                                                                          |
|------------------------------------------------------------------------------------------------------------------------------------------------------------------------------------------------------------------------------------------------------------------------------------------------------------------------------------------------------------------------------------------------------------------------------------------------------------------------------------------------------------------------------------------------------------------------------------------------------------------------------------------------------------------------------------------------------------------------------------------------------------------------------------------------------------------------------------------------------------------------------------------------------------------------------------------------|---------------------------------------------------------------------------------------------------------------------------------------------------------------------------------------------------------------------|----------------------------------------------------------------------------------------------------------------------------------------|----------------------------------------------------------------------------------------------------------------------------------------------------------------------------------------------------------------------------------------------------------------------------------------------------------------------------------------------------------|
| EPI_ISL_994722, EPI_ISL_994723, EPI_ISL_994724, EPI_ISL_994725, EPI_ISL_994726, EPI_ISL_994727, EPI_ISL_994728, EPI_ISL_994729, EPI_ISL_994730, EPI_ISL_994731, EPI_ISL_994732, EPI_ISL_994733, EPI_ISL_994734, EPI_ISL_994749, EPI_ISL_994756, EPI_ISL_994757, EPI_ISL_994760, EPI_ISL_994762, EPI_ISL_994763, EPI_ISL_994765, EPI_ISL_994766, EPI_ISL_994767, EPI_ISL_994770, EPI_ISL_994772, EPI_ISL_994773, EPI_ISL_994774, EPI_ISL_994775, EPI_ISL_994776, EPI_ISL_994777, EPI_ISL_994778, EPI_ISL_994779, EPI_ISL_994780, EPI_ISL_994781, EPI_ISL_994782, EPI_ISL_994783, EPI_ISL_994784, EPI_ISL_994785, EPI_ISL_994786, EPI_ISL_994787, EPI_ISL_994788, EPI_ISL_994789, EPI_ISL_994790, EPI_ISL_994791, EPI_ISL_994792, EPI_ISL_994793, EPI_ISL_994794, EPI_ISL_994795, EPI_ISL_994796, EPI_ISL_994797, EPI_ISL_994798, EPI_ISL_994799, EPI_ISL_994800, EPI_ISL_994801                                                                 |                                                                                                                                                                                                                     |                                                                                                                                        |                                                                                                                                                                                                                                                                                                                                                          |
| see above                                                                                                                                                                                                                                                                                                                                                                                                                                                                                                                                                                                                                                                                                                                                                                                                                                                                                                                                      | Division of Emerging Infectious Diseases, Bureau of Infectious Diseases Diagnosis Control, Korea Disease Control and Prevention Agency                                                                              | Division of Emerging Infectious Diseases, Bureau of Infectious Diseases Diagnosis Control, Korea Disease Control and Prevention Agency | Ae Kyung Park, Il-Hwan Kim, Heui Man Kim, Jeong-Min Kim, Namjoo Lee, Chae Young Lee, Sang Hee Woo, Eun-Jin Kim                                                                                                                                                                                                                                           |
| EPI_ISL_995185, EPI_ISL_995186                                                                                                                                                                                                                                                                                                                                                                                                                                                                                                                                                                                                                                                                                                                                                                                                                                                                                                                 | KARWAR INSTITUTE OF MEDICAL SCIENCES                                                                                                                                                                                | Department of Neurovirology, National Institute of Mental Health and Neurosciences (NIMHANS)                                           | Chitra Pattabiraman, Pramada Prasad, Anson Kunjumon George, Risha Rasheed, Darshan Sreenivas, Nakka Vijay Kiran Reddy, Anita S Desai, V Ravi                                                                                                                                                                                                             |
| EPI_ISL_995192, EPI_ISL_995195, EPI_ISL_995197, EPI_ISL_995199, EPI_ISL_995200, EPI_ISL_995220, EPI_ISL_995222, EPI_ISL_995229, EPI_ISL_995232, EPI_ISL_995236, EPI_ISL_995239, EPI_ISL_995240, EPI_ISL_995243, EPI_ISL_995244, EPI_ISL_995245, EPI_ISL_995246, EPI_ISL_995247, EPI_ISL_995248, EPI_ISL_995249, EPI_ISL_995250, EPI_ISL_995251, EPI_ISL_995252, EPI_ISL_995253, EPI_ISL_995254, EPI_ISL_995255, EPI_ISL_995256, EPI_ISL_995257, EPI_ISL_995258, EPI_ISL_995259, EPI_ISL_995260, EPI_ISL_995261, EPI_ISL_995262, EPI_ISL_995263, EPI_ISL_995264, EPI_ISL_995265, EPI_ISL_995266, EPI_ISL_995267, EPI_ISL_995268, EPI_ISL_995269, EPI_ISL_995270, EPI_ISL_995280, EPI_ISL_995282, EPI_ISL_995284, EPI_ISL_995286, EPI_ISL_995288, EPI_ISL_995308, EPI_ISL_995309, EPI_ISL_995312, EPI_ISL_995313, EPI_ISL_995315, EPI_ISL_995317, EPI_ISL_995318, EPI_ISL_995319, EPI_ISL_995320, EPI_ISL_995325, EPI_ISL_995327, EPI_ISL_995329 |                                                                                                                                                                                                                     |                                                                                                                                        |                                                                                                                                                                                                                                                                                                                                                          |
| see above                                                                                                                                                                                                                                                                                                                                                                                                                                                                                                                                                                                                                                                                                                                                                                                                                                                                                                                                      | Division of Emerging Infectious Diseases, Bureau of Infectious Diseases Diagnosis Control, Korea Disease Control and Prevention Agency                                                                              | Division of Emerging Infectious Diseases, Bureau of Infectious Diseases Diagnosis Control, Korea Disease Control and Prevention Agency | Ae Kyung Park, Il-Hwan Kim, Heui Man Kim, Jeong-Min Kim, Namjoo Lee, Chae Young Lee, Sang Hee Woo, Eun-Jin Kim                                                                                                                                                                                                                                           |
| EPI_ISL_996494, EPI_ISL_996497, EPI_ISL_996498, EPI_ISL_996499, EPI_ISL_996507, EPI_ISL_996513, EPI_ISL_996585                                                                                                                                                                                                                                                                                                                                                                                                                                                                                                                                                                                                                                                                                                                                                                                                                                 | University of Exeter                                                                                                                                                                                                | COVID-19 Genomics UK (COG-UK) Consortium                                                                                               | Ben Temperton, Aaron Jeffries, Michelle Michelsen, Joanna Warwick-Dugdale, Audrey Farbos, Robyn Manley, Stephen Michell, Jane Masoli                                                                                                                                                                                                                     |
| EPI_ISL_997113, EPI_ISL_997114, EPI_ISL_997115, EPI_ISL_997116, EPI_ISL_997117, EPI_ISL_997119, EPI_ISL_997122, EPI_ISL_997123, EPI_ISL_997124                                                                                                                                                                                                                                                                                                                                                                                                                                                                                                                                                                                                                                                                                                                                                                                                 | Virology Department, Royal Infirmary of Edinburgh, NHS Lothian / School of Biological Sciences, University of Edinburgh                                                                                             | COVID-19 Genomics UK (COG-UK) Consortium                                                                                               | McHugh M, Dewar R, Cotton S, Rooke S, O'Toole Á, Scher E, Hill V, McCrone JT, Colquhoun R, Yu X, Jackson B, Rambaut A, Templeton K                                                                                                                                                                                                                       |
| EPI_ISL_997290, EPI_ISL_997291, EPI_ISL_997292, EPI_ISL_997293, EPI_ISL_997296, EPI_ISL_997297, EPI_ISL_997300, EPI_ISL_997301, EPI_ISL_997304, EPI_ISL_997318, EPI_ISL_997346, EPI_ISL_997349, EPI_ISL_997352, EPI_ISL_997354, EPI_ISL_997357, EPI_ISL_997360, EPI_ISL_997363                                                                                                                                                                                                                                                                                                                                                                                                                                                                                                                                                                                                                                                                 |                                                                                                                                                                                                                     |                                                                                                                                        |                                                                                                                                                                                                                                                                                                                                                          |
| see above                                                                                                                                                                                                                                                                                                                                                                                                                                                                                                                                                                                                                                                                                                                                                                                                                                                                                                                                      | University of Exeter                                                                                                                                                                                                | COVID-19 Genomics UK (COG-UK) Consortium                                                                                               | Ben Temperton, Aaron Jeffries, Michelle Michelsen, Joanna Warwick-Dugdale, Audrey Farbos, Robyn Manley, Stephen Michell, Jane Masoli                                                                                                                                                                                                                     |
| EPI_ISL_998600, EPI_ISL_998608, EPI_ISL_998617, EPI_ISL_998631, EPI_ISL_998643, EPI_ISL_998702                                                                                                                                                                                                                                                                                                                                                                                                                                                                                                                                                                                                                                                                                                                                                                                                                                                 | Northumbria University / South Tees Hospitals NHS Foundation Trust / North Cumbria Integrated Care NHS Foundation Trust / North Tees and Hartlepool NHS Foundation Trust / Newcastle Hospitals NHS Foundation Trust | COVID-19 Genomics UK (COG-UK) Consortium                                                                                               | Darren L Smith, Andrew Nelson, Matthew Bashton, Greg R Young, Joshua Loh, John Allan, Mohammad A Tariq, Giles S Holt, Gary Black, Wen C Yew, Lynn Dover, Paul Baker, Steve Liggett, Sarah Essex, Jane Greenaway, Debra Padgett, Clive Graham, Garren Scott, Edward Barton, Emma Swindells, Brendan Payne, Jennifer Collins, Yusrri Taha, Gary Eltringham |
| EPI_ISL_998930                                                                                                                                                                                                                                                                                                                                                                                                                                                                                                                                                                                                                                                                                                                                                                                                                                                                                                                                 | Lincolnshire Hospitals and DeepSeq Nottingham                                                                                                                                                                       | COVID-19 Genomics UK (COG-UK) Consortium                                                                                               | Nichola Duckworth, Tim Sloan, Sarah Walsh, Jonathan Ball, Patrick McClure, Joeseeph Chappell, Nadine Holmes, Matthew Carlisle, Christopher Moore, Fei Sang, Johnny Debebe, Victoria Wright, Matthew Loose                                                                                                                                                |

We gratefully acknowledge the following Authors from the Originating laboratories responsible for obtaining the specimens, as well as the Submitting laboratories where the genome data were generated and shared via GISAID, on which this research is based.

All Submitters of data may be contacted directly via [www.gisaid.org](http://www.gisaid.org)

Authors are sorted alphabetically.

| Accession ID                                                                                                                                                                                                                                                                                                                                                                                                                                                                                                                                                                                                                                                                                                                             | Originating Laboratory                                                                                                                                                           | Submitting Laboratory                                                                    | Authors                                                                                                                                                                                                                                                                                                                                                                                                                                                                  |
|------------------------------------------------------------------------------------------------------------------------------------------------------------------------------------------------------------------------------------------------------------------------------------------------------------------------------------------------------------------------------------------------------------------------------------------------------------------------------------------------------------------------------------------------------------------------------------------------------------------------------------------------------------------------------------------------------------------------------------------|----------------------------------------------------------------------------------------------------------------------------------------------------------------------------------|------------------------------------------------------------------------------------------|--------------------------------------------------------------------------------------------------------------------------------------------------------------------------------------------------------------------------------------------------------------------------------------------------------------------------------------------------------------------------------------------------------------------------------------------------------------------------|
| EPI_ISL_1000017, EPI_ISL_1000025, EPI_ISL_1000028, EPI_ISL_1000051, EPI_ISL_1000057, EPI_ISL_1000066, EPI_ISL_1000068, EPI_ISL_1000082, EPI_ISL_1000085, EPI_ISL_1000094, EPI_ISL_1000095, EPI_ISL_1000098, EPI_ISL_1000105, EPI_ISL_1000109, EPI_ISL_1000113, EPI_ISL_1000115, EPI_ISL_1000122, EPI_ISL_1000125, EPI_ISL_1000131, EPI_ISL_1000134, EPI_ISL_1000135, EPI_ISL_1000137, EPI_ISL_1000142, EPI_ISL_1000143, EPI_ISL_1000144, EPI_ISL_1000146, EPI_ISL_1000152, EPI_ISL_1000153, EPI_ISL_1000154, EPI_ISL_1000156, EPI_ISL_1000158, EPI_ISL_1000159, EPI_ISL_1000160, EPI_ISL_1000163, EPI_ISL_1000164, EPI_ISL_1000165, EPI_ISL_1000166, EPI_ISL_1000171, EPI_ISL_1000182, EPI_ISL_1000183, EPI_ISL_1000184, EPI_ISL_1000186 |                                                                                                                                                                                  |                                                                                          |                                                                                                                                                                                                                                                                                                                                                                                                                                                                          |
| see above                                                                                                                                                                                                                                                                                                                                                                                                                                                                                                                                                                                                                                                                                                                                | Wales Specialist Virology Centre Sequencing lab: Pathogen Genomics Unit                                                                                                          | Public Health Wales Microbiology Cardiff Wales Specialist Virology Centre                | Catherine Moore, Johnathan Evans, Laura Gifford, Malorie Perry, Simon Cottrell, Angela Marchbank, Alec Birchley, Alexander Adams, Amy Gaskin, Bree Gatica-Wilcox, Jason Coombes, Joel Southgate, Lauren Gilbert, Lee Graham, Nicole Pacchiarini, Sara Kumziene-Summerhayes, Sarah Taylor, Sophie Jones, Sara Rey, Matthew Bull, Joanne Watkins, Sally Corden, Tom Connor                                                                                                 |
| EPI_ISL_1000189, EPI_ISL_1000201, EPI_ISL_1000208, EPI_ISL_1000223, EPI_ISL_1000319                                                                                                                                                                                                                                                                                                                                                                                                                                                                                                                                                                                                                                                      | Centre for Enzyme Innovation, University of Portsmouth / Translational Research Laboratory, Portsmouth Hospitals NHS Trust                                                       | COVID-19 Genomics UK (COG-UK) Consortium                                                 | Angela Beckett,Salman Goudarzi,Christopher Fearn,Kate Cook,Katie Loveson,Sharon Glaysher,Scott Elliott,Samuel Robson                                                                                                                                                                                                                                                                                                                                                     |
| EPI_ISL_1000666, EPI_ISL_1000679, EPI_ISL_1000696, EPI_ISL_1000716, EPI_ISL_1000750, EPI_ISL_1000751, EPI_ISL_1000784, EPI_ISL_1000786, EPI_ISL_1000790                                                                                                                                                                                                                                                                                                                                                                                                                                                                                                                                                                                  | Virology Department, Sheffield Teaching Hospitals NHS Foundation Trust/Department of Infection, Immunity and Cardiovascular Disease, The Medical School, University of Sheffield | COVID-19 Genomics UK (COG-UK) Consortium                                                 | Thushan de Silva, Matthew Parker, Nikki Smith, Adri Angyal, Rebecca Brown, Luke Green, Rachel Tucker, Paul Parsons, Danielle Groves, Katie Johnson, Laura Carrilero, Alex Keeley, Dave Partridge, Matthew Wyles, Benjamin Lindsey, Mehmet Yavuz, Mohammad Raza, Cariad Evans                                                                                                                                                                                             |
| EPI_ISL_1000844, EPI_ISL_1000850, EPI_ISL_1000861, EPI_ISL_1000876, EPI_ISL_1000877, EPI_ISL_1000878, EPI_ISL_1000880, EPI_ISL_1000921, EPI_ISL_1000927, EPI_ISL_1000935                                                                                                                                                                                                                                                                                                                                                                                                                                                                                                                                                                 | Bioinformatics and Biostatistics Lab, Advanced Sequencing Facility                                                                                                               | COVID-19 Genomics UK (COG-UK) Consortium                                                 | Aengus Stewart,Jerome Nicod,Chelsea Sawyer,Laura Cubitt,Harshil Patel,Margaret Crawford                                                                                                                                                                                                                                                                                                                                                                                  |
| EPI_ISL_1000993                                                                                                                                                                                                                                                                                                                                                                                                                                                                                                                                                                                                                                                                                                                          | KU Leuven, Rega Institute, Clinical and Epidemiological Virology                                                                                                                 | KU Leuven, Rega Institute, Clinical and Epidemiological Virology                         | Tony Wawina-Bokalanga, Bert Vanmechelen, Joan Marti-Carerras, Piet Maes                                                                                                                                                                                                                                                                                                                                                                                                  |
| EPI_ISL_1001006, EPI_ISL_1001039                                                                                                                                                                                                                                                                                                                                                                                                                                                                                                                                                                                                                                                                                                         | Santa Clara County Public Health Laboratory                                                                                                                                      | Santa Clara County Public Health Laboratory                                              | Santa Clara County Public Health Department                                                                                                                                                                                                                                                                                                                                                                                                                              |
| EPI_ISL_1001183, EPI_ISL_1001221, EPI_ISL_1001261, EPI_ISL_1001262                                                                                                                                                                                                                                                                                                                                                                                                                                                                                                                                                                                                                                                                       | National Virus Reference Laboratory                                                                                                                                              | National Virus Reference Laboratory                                                      | Michael Carr, Gabriel Gonzalez, Zoe Yandle, Jonathan Dean, Cillian F De Gascun                                                                                                                                                                                                                                                                                                                                                                                           |
| EPI_ISL_1001354, EPI_ISL_1001386                                                                                                                                                                                                                                                                                                                                                                                                                                                                                                                                                                                                                                                                                                         | Hopital                                                                                                                                                                          | National Reference Center for Viruses of Respiratory Infections, Institut Pasteur, Paris | Marion Barbet, Sylvie Behillil, Méline Bizard, Angela Brisebarre, Camille Capel, Etienne Simon-Lorière, Vincent Enouf, Maud Vanpeene, Sylvie van der Werf,Griscelli Franck                                                                                                                                                                                                                                                                                               |
| EPI_ISL_1001391                                                                                                                                                                                                                                                                                                                                                                                                                                                                                                                                                                                                                                                                                                                          | Hopital                                                                                                                                                                          | National Reference Center for Viruses of Respiratory Infections, Institut Pasteur, Paris | Marion Barbet, Sylvie Behillil, Méline Bizard, Angela Brisebarre, Camille Capel, Etienne Simon-Lorière, Vincent Enouf, Maud Vanpeene, Sylvie van der Werf,Thellier                                                                                                                                                                                                                                                                                                       |
| EPI_ISL_1001392                                                                                                                                                                                                                                                                                                                                                                                                                                                                                                                                                                                                                                                                                                                          | Hopital                                                                                                                                                                          | National Reference Center for Viruses of Respiratory Infections, Institut Pasteur, Paris | Marion Barbet, Sylvie Behillil, Méline Bizard, Angela Brisebarre, Camille Capel, Etienne Simon-Lorière, Vincent Enouf, Maud Vanpeene, Sylvie van der Werf,Lagathu GisèLe                                                                                                                                                                                                                                                                                                 |
| EPI_ISL_1001393                                                                                                                                                                                                                                                                                                                                                                                                                                                                                                                                                                                                                                                                                                                          | Hopital                                                                                                                                                                          | National Reference Center for Viruses of Respiratory Infections, Institut Pasteur, Paris | Marion Barbet, Sylvie Behillil, Méline Bizard, Angela Brisebarre, Camille Capel, Etienne Simon-Lorière, Vincent Enouf, Maud Vanpeene, Sylvie van der Werf,Thellier                                                                                                                                                                                                                                                                                                       |
| EPI_ISL_1001851, EPI_ISL_1001852                                                                                                                                                                                                                                                                                                                                                                                                                                                                                                                                                                                                                                                                                                         | Viollier AG                                                                                                                                                                      | Department of Biosystems Science and Engineering, ETH Zürich                             | Christian Beisel, Sarah Nadeau, Chaoran Chen, Ivan Topolsky, Philipp Jablonski, Lara Fuhrmann, David Dreifuss, Katharina Jahn, Rebecca Denes, Ina Nissen, Natascha Santacroce, Elodie Burcklen, Christiane Beckmann, Maurice Redondo, Olivier Kobel, Christoph Noppen, Sophie Seidel, Noemie Santamaria de Souza, Niko Beerenwinkel, Tanja Stadler                                                                                                                       |
| EPI_ISL_1001854, EPI_ISL_1001861                                                                                                                                                                                                                                                                                                                                                                                                                                                                                                                                                                                                                                                                                                         | Viollier AG                                                                                                                                                                      | Department of Biosystems Science and Engineering, ETH Zürich                             | Chaoran Chen, Sarah Nadeau, Catharine Aquino, Ivan Topolsky, Philipp Jablonski, Lara Fuhrmann, David Dreifuss, Katharina Jahn, Andreia Cabral de Gouvea, Maria Domenica Moccia, Simon Grüter, Timothy Sykes, Lennart Opitz, Griffin White, Laura Neff, Doris Popovic, Andrea Patrignani, Jay Tracy, Ralph Schlapbach, Christiane Beckmann, Maurice Redondo, Olivier Kobel, Christoph Noppen, Sophie Seidel, Noemie Santamaria de Souza, Niko Beerenwinkel, Tanja Stadler |
| EPI_ISL_1001862                                                                                                                                                                                                                                                                                                                                                                                                                                                                                                                                                                                                                                                                                                                          | Viollier AG                                                                                                                                                                      | Department of Biosystems Science and Engineering, ETH Zürich                             | Christian Beisel, Sarah Nadeau, Chaoran Chen, Ivan Topolsky, Philipp Jablonski, Lara Fuhrmann, David Dreifuss, Katharina Jahn, Rebecca Denes, Ina Nissen, Natascha Santacroce, Elodie Burcklen, Christiane Beckmann, Maurice Redondo, Olivier Kobel, Christoph Noppen, Sophie Seidel, Noemie Santamaria de Souza, Niko Beerenwinkel, Tanja Stadler                                                                                                                       |
| EPI_ISL_1001877, EPI_ISL_1002205, EPI_ISL_1002206, EPI_ISL_1002207                                                                                                                                                                                                                                                                                                                                                                                                                                                                                                                                                                                                                                                                       | Viollier AG                                                                                                                                                                      | Department of Biosystems Science and Engineering, ETH Zürich                             | Chaoran Chen, Sarah Nadeau, Catharine Aquino, Ivan Topolsky, Philipp Jablonski, Lara Fuhrmann, David Dreifuss, Katharina Jahn, Andreia Cabral de Gouvea, Maria Domenica Moccia, Simon Grüter, Timothy Sykes, Lennart Opitz, Griffin White, Laura Neff, Doris Popovic, Andrea Patrignani, Jay Tracy, Ralph Schlapbach, Christiane Beckmann, Maurice Redondo, Olivier Kobel, Christoph Noppen, Sophie Seidel, Noemie Santamaria de Souza, Niko Beerenwinkel, Tanja Stadler |
| EPI_ISL_1002312                                                                                                                                                                                                                                                                                                                                                                                                                                                                                                                                                                                                                                                                                                                          | Viollier AG                                                                                                                                                                      | Department of Biosystems Science and Engineering, ETH Zürich                             | Christian Beisel, Sarah Nadeau, Chaoran Chen, Ivan Topolsky, Philipp Jablonski, Lara Fuhrmann, David Dreifuss, Katharina Jahn, Rebecca Denes, Ina Nissen, Natascha Santacroce, Elodie Burcklen, Christiane Beckmann, Maurice Redondo, Olivier Kobel, Christoph Noppen, Sophie Seidel, Noemie Santamaria de Souza, Niko Beerenwinkel, Tanja Stadler                                                                                                                       |
| EPI_ISL_1002314                                                                                                                                                                                                                                                                                                                                                                                                                                                                                                                                                                                                                                                                                                                          | Viollier AG                                                                                                                                                                      | Department of Biosystems Science and Engineering, ETH Zürich                             | Chaoran Chen, Sarah Nadeau, Catharine Aquino, Ivan Topolsky, Philipp Jablonski, Lara Fuhrmann, David Dreifuss, Katharina Jahn, Andreia Cabral de Gouvea, Maria Domenica Moccia, Simon Grüter, Timothy Sykes, Lennart Opitz, Griffin White, Laura Neff, Doris Popovic, Andrea Patrignani, Jay Tracy, Ralph Schlapbach, Christiane Beckmann, Maurice Redondo, Olivier Kobel, Christoph Noppen, Sophie Seidel, Noemie Santamaria de Souza, Niko Beerenwinkel, Tanja Stadler |
| EPI_ISL_1002315, EPI_ISL_1002316, EPI_ISL_1002317                                                                                                                                                                                                                                                                                                                                                                                                                                                                                                                                                                                                                                                                                        | Viollier AG                                                                                                                                                                      | Department of Biosystems Science and Engineering, ETH Zürich                             | Christian Beisel, Sarah Nadeau, Chaoran Chen, Ivan Topolsky, Philipp Jablonski, Lara Fuhrmann, David Dreifuss, Katharina Jahn, Rebecca Denes, Ina Nissen, Natascha Santacroce, Elodie Burcklen, Christiane Beckmann, Maurice Redondo, Olivier Kobel, Christoph Noppen, Sophie Seidel, Noemie Santamaria de Souza, Niko Beerenwinkel, Tanja Stadler                                                                                                                       |
| EPI_ISL_1002346                                                                                                                                                                                                                                                                                                                                                                                                                                                                                                                                                                                                                                                                                                                          | Viollier AG                                                                                                                                                                      | Department of Biosystems Science and Engineering, ETH Zürich                             | Chaoran Chen, Sarah Nadeau, Catharine Aquino, Ivan Topolsky, Philipp Jablonski, Lara Fuhrmann, David Dreifuss, Katharina Jahn, Andreia Cabral de Gouvea, Maria Domenica Moccia, Simon Grüter, Timothy Sykes, Lennart Opitz, Griffin White, Laura Neff, Doris Popovic, Andrea Patrignani, Jay Tracy, Ralph Schlapbach, Christiane Beckmann, Maurice Redondo, Olivier Kobel, Christoph Noppen, Sophie Seidel, Noemie Santamaria de Souza, Niko Beerenwinkel, Tanja Stadler |
| EPI_ISL_1002347                                                                                                                                                                                                                                                                                                                                                                                                                                                                                                                                                                                                                                                                                                                          | Viollier AG                                                                                                                                                                      | Department of Biosystems Science and Engineering, ETH Zürich                             | Christian Beisel, Sarah Nadeau, Chaoran Chen, Ivan Topolsky, Philipp Jablonski, Lara Fuhrmann, David Dreifuss, Katharina Jahn, Rebecca Denes, Ina Nissen, Natascha Santacroce, Elodie Burcklen, Christiane Beckmann, Maurice Redondo, Olivier Kobel, Christoph Noppen, Sophie Seidel, Noemie Santamaria de Souza, Niko Beerenwinkel, Tanja Stadler                                                                                                                       |
| EPI_ISL_1003928, EPI_ISL_1003929, EPI_ISL_1003930, EPI_ISL_1003931,                                                                                                                                                                                                                                                                                                                                                                                                                                                                                                                                                                                                                                                                      | Viollier AG                                                                                                                                                                      | Department of Biosystems Science and Engineering, ETH Zürich                             | Chaoran Chen, Sarah Nadeau, Catharine Aquino, Ivan Topolsky, Philipp Jablonski, Lara Fuhrmann, David Dreifuss, Katharina Jahn, Andreia Cabral de Gouvea, Maria Domenica Moccia, Simon Grüter, Timothy Sykes, Lennart Opitz, Griffin White, Laura Neff, Doris Popovic, Andrea Patrignani, Jay Tracy,                                                                                                                                                                      |

[illegible]

[illegible]



[illegible]

[illegible]

[illegible]

[illegible]

[illegible]



|                                                                                                                                                                                                                                                                                                                                                                                                                                                                                                                                                                                                                                                                                                                                                                                                                                                                                                                                                                                                                                                                                                                                                                                                                                                                                                                                                                                                                                                                                                                                                                                                                                                                                                                                                                                                                                                                                                                                                                                                                                                                                                                                                                                                                                                                                                                                                                                                                                                                                                                                                                                                                                                                                                                                                                                                                                                                                                                                                                                                                                                                                                                                                                                                                                                                                                                                                                                                                                                                                                                                                                                                                                                                                                                                                                                                                                                                                                                                               |                                                                                                     |                                                                                                                        |                                                                                                                                                                                                                                                                          |                                                                                                                                                                                                                                                                                                   |
|-----------------------------------------------------------------------------------------------------------------------------------------------------------------------------------------------------------------------------------------------------------------------------------------------------------------------------------------------------------------------------------------------------------------------------------------------------------------------------------------------------------------------------------------------------------------------------------------------------------------------------------------------------------------------------------------------------------------------------------------------------------------------------------------------------------------------------------------------------------------------------------------------------------------------------------------------------------------------------------------------------------------------------------------------------------------------------------------------------------------------------------------------------------------------------------------------------------------------------------------------------------------------------------------------------------------------------------------------------------------------------------------------------------------------------------------------------------------------------------------------------------------------------------------------------------------------------------------------------------------------------------------------------------------------------------------------------------------------------------------------------------------------------------------------------------------------------------------------------------------------------------------------------------------------------------------------------------------------------------------------------------------------------------------------------------------------------------------------------------------------------------------------------------------------------------------------------------------------------------------------------------------------------------------------------------------------------------------------------------------------------------------------------------------------------------------------------------------------------------------------------------------------------------------------------------------------------------------------------------------------------------------------------------------------------------------------------------------------------------------------------------------------------------------------------------------------------------------------------------------------------------------------------------------------------------------------------------------------------------------------------------------------------------------------------------------------------------------------------------------------------------------------------------------------------------------------------------------------------------------------------------------------------------------------------------------------------------------------------------------------------------------------------------------------------------------------------------------------------------------------------------------------------------------------------------------------------------------------------------------------------------------------------------------------------------------------------------------------------------------------------------------------------------------------------------------------------------------------------------------------------------------------------------------------------------------------|-----------------------------------------------------------------------------------------------------|------------------------------------------------------------------------------------------------------------------------|--------------------------------------------------------------------------------------------------------------------------------------------------------------------------------------------------------------------------------------------------------------------------|---------------------------------------------------------------------------------------------------------------------------------------------------------------------------------------------------------------------------------------------------------------------------------------------------|
| EPI_ISL_1008665, EPI_ISL_1008667                                                                                                                                                                                                                                                                                                                                                                                                                                                                                                                                                                                                                                                                                                                                                                                                                                                                                                                                                                                                                                                                                                                                                                                                                                                                                                                                                                                                                                                                                                                                                                                                                                                                                                                                                                                                                                                                                                                                                                                                                                                                                                                                                                                                                                                                                                                                                                                                                                                                                                                                                                                                                                                                                                                                                                                                                                                                                                                                                                                                                                                                                                                                                                                                                                                                                                                                                                                                                                                                                                                                                                                                                                                                                                                                                                                                                                                                                                              | Istituto Zooprofilattico Sperimentale della Puglia e della Basilicata                               | Istituto Zooprofilattico Sperimentale della Puglia e della Basilicata                                                  | Parisi A., Bianco A., Capozzi L., Del Sambio L., Simone D., Chironna M., Loconsole D., Sallustio A., Ridolfi D.                                                                                                                                                          |                                                                                                                                                                                                                                                                                                   |
| EPI_ISL_1008669, EPI_ISL_1008671, EPI_ISL_1008672, EPI_ISL_1008673, EPI_ISL_1008675, EPI_ISL_1008677                                                                                                                                                                                                                                                                                                                                                                                                                                                                                                                                                                                                                                                                                                                                                                                                                                                                                                                                                                                                                                                                                                                                                                                                                                                                                                                                                                                                                                                                                                                                                                                                                                                                                                                                                                                                                                                                                                                                                                                                                                                                                                                                                                                                                                                                                                                                                                                                                                                                                                                                                                                                                                                                                                                                                                                                                                                                                                                                                                                                                                                                                                                                                                                                                                                                                                                                                                                                                                                                                                                                                                                                                                                                                                                                                                                                                                          | Istituto Zooprofilattico Sperimentale della Puglia e della Basilicata                               | Istituto Zooprofilattico Sperimentale della Puglia e della Basilicata                                                  | Parisi A., Bianco A., Capozzi L., Del Sambio L., Simone D., Chironna M., Loconsole D., Sallustio A., Giannico A.                                                                                                                                                         |                                                                                                                                                                                                                                                                                                   |
| EPI_ISL_1008679, EPI_ISL_1008681, EPI_ISL_1008682, EPI_ISL_1008684, EPI_ISL_1008685, EPI_ISL_1008686, EPI_ISL_1008687                                                                                                                                                                                                                                                                                                                                                                                                                                                                                                                                                                                                                                                                                                                                                                                                                                                                                                                                                                                                                                                                                                                                                                                                                                                                                                                                                                                                                                                                                                                                                                                                                                                                                                                                                                                                                                                                                                                                                                                                                                                                                                                                                                                                                                                                                                                                                                                                                                                                                                                                                                                                                                                                                                                                                                                                                                                                                                                                                                                                                                                                                                                                                                                                                                                                                                                                                                                                                                                                                                                                                                                                                                                                                                                                                                                                                         | Istituto Zooprofilattico Sperimentale della Puglia e della Basilicata                               | Istituto Zooprofilattico Sperimentale della Puglia e della Basilicata                                                  | Parisi A., Bianco A., Capozzi L., Del Sambio L., Simone D., Chironna M., Loconsole D., Sallustio A., Ridolfi D.                                                                                                                                                          |                                                                                                                                                                                                                                                                                                   |
| EPI_ISL_1008688, EPI_ISL_1008690, EPI_ISL_1008691, EPI_ISL_1008694, EPI_ISL_1008695, EPI_ISL_1008696, EPI_ISL_1008697, EPI_ISL_1008698                                                                                                                                                                                                                                                                                                                                                                                                                                                                                                                                                                                                                                                                                                                                                                                                                                                                                                                                                                                                                                                                                                                                                                                                                                                                                                                                                                                                                                                                                                                                                                                                                                                                                                                                                                                                                                                                                                                                                                                                                                                                                                                                                                                                                                                                                                                                                                                                                                                                                                                                                                                                                                                                                                                                                                                                                                                                                                                                                                                                                                                                                                                                                                                                                                                                                                                                                                                                                                                                                                                                                                                                                                                                                                                                                                                                        | Istituto Zooprofilattico Sperimentale della Puglia e della Basilicata                               | Istituto Zooprofilattico Sperimentale della Puglia e della Basilicata                                                  | Parisi A., Bianco A., Capozzi L., Del Sambio L., Simone D., Chironna M., Loconsole D., Sallustio A., Giannico A.                                                                                                                                                         |                                                                                                                                                                                                                                                                                                   |
| EPI_ISL_1008706                                                                                                                                                                                                                                                                                                                                                                                                                                                                                                                                                                                                                                                                                                                                                                                                                                                                                                                                                                                                                                                                                                                                                                                                                                                                                                                                                                                                                                                                                                                                                                                                                                                                                                                                                                                                                                                                                                                                                                                                                                                                                                                                                                                                                                                                                                                                                                                                                                                                                                                                                                                                                                                                                                                                                                                                                                                                                                                                                                                                                                                                                                                                                                                                                                                                                                                                                                                                                                                                                                                                                                                                                                                                                                                                                                                                                                                                                                                               | Ospedale Santissima Annunziata                                                                      | Istituto Zooprofilattico Sperimentale della Puglia e della Basilicata                                                  | Parisi A., Bianco A., Capozzi L., Del Sambio L., Simone D., Chironna M., Loconsole D., Sallustio A., Ridolfi D.                                                                                                                                                          |                                                                                                                                                                                                                                                                                                   |
| EPI_ISL_1008921, EPI_ISL_1008922                                                                                                                                                                                                                                                                                                                                                                                                                                                                                                                                                                                                                                                                                                                                                                                                                                                                                                                                                                                                                                                                                                                                                                                                                                                                                                                                                                                                                                                                                                                                                                                                                                                                                                                                                                                                                                                                                                                                                                                                                                                                                                                                                                                                                                                                                                                                                                                                                                                                                                                                                                                                                                                                                                                                                                                                                                                                                                                                                                                                                                                                                                                                                                                                                                                                                                                                                                                                                                                                                                                                                                                                                                                                                                                                                                                                                                                                                                              | LA Office of Public Health Laboratories                                                             | Pathogen Discovery, Respiratory Viruses Branch, Division of Viral Diseases, Centers for Disease Control and Prevention | Ying Tao, Jing Zhang, Yan Li, Krista Queen, Anna Uehara, Peter Cook, Clinton R. Paden, Haibin Wang, Suxiang Tong                                                                                                                                                         |                                                                                                                                                                                                                                                                                                   |
| EPI_ISL_1008928, EPI_ISL_1008929                                                                                                                                                                                                                                                                                                                                                                                                                                                                                                                                                                                                                                                                                                                                                                                                                                                                                                                                                                                                                                                                                                                                                                                                                                                                                                                                                                                                                                                                                                                                                                                                                                                                                                                                                                                                                                                                                                                                                                                                                                                                                                                                                                                                                                                                                                                                                                                                                                                                                                                                                                                                                                                                                                                                                                                                                                                                                                                                                                                                                                                                                                                                                                                                                                                                                                                                                                                                                                                                                                                                                                                                                                                                                                                                                                                                                                                                                                              | MS Public Health Laboratory                                                                         | Pathogen Discovery, Respiratory Viruses Branch, Division of Viral Diseases, Centers for Disease Control and Prevention | Ying Tao, Jing Zhang, Yan Li, Krista Queen, Anna Uehara, Peter Cook, Clinton R. Paden, Haibin Wang, Suxiang Tong                                                                                                                                                         |                                                                                                                                                                                                                                                                                                   |
| EPI_ISL_1009666, EPI_ISL_1009670                                                                                                                                                                                                                                                                                                                                                                                                                                                                                                                                                                                                                                                                                                                                                                                                                                                                                                                                                                                                                                                                                                                                                                                                                                                                                                                                                                                                                                                                                                                                                                                                                                                                                                                                                                                                                                                                                                                                                                                                                                                                                                                                                                                                                                                                                                                                                                                                                                                                                                                                                                                                                                                                                                                                                                                                                                                                                                                                                                                                                                                                                                                                                                                                                                                                                                                                                                                                                                                                                                                                                                                                                                                                                                                                                                                                                                                                                                              | Auburn Sports Medicine                                                                              | Synergy Laboratories                                                                                                   | Megan Cornwell                                                                                                                                                                                                                                                           |                                                                                                                                                                                                                                                                                                   |
| EPI_ISL_1010706                                                                                                                                                                                                                                                                                                                                                                                                                                                                                                                                                                                                                                                                                                                                                                                                                                                                                                                                                                                                                                                                                                                                                                                                                                                                                                                                                                                                                                                                                                                                                                                                                                                                                                                                                                                                                                                                                                                                                                                                                                                                                                                                                                                                                                                                                                                                                                                                                                                                                                                                                                                                                                                                                                                                                                                                                                                                                                                                                                                                                                                                                                                                                                                                                                                                                                                                                                                                                                                                                                                                                                                                                                                                                                                                                                                                                                                                                                                               | Area of Virology, Serology and Virology Division (SAVID), New South Wales Health Pathology Randwick | Microbiology RPAH                                                                                                      | Foster, C.; Au, J.; Ruiz Silva, M.; Deveson, I.; Bull, R.; Van Hal, S.; Rawlinson, W.                                                                                                                                                                                    |                                                                                                                                                                                                                                                                                                   |
| EPI_ISL_1010708, EPI_ISL_1010709, EPI_ISL_1010713                                                                                                                                                                                                                                                                                                                                                                                                                                                                                                                                                                                                                                                                                                                                                                                                                                                                                                                                                                                                                                                                                                                                                                                                                                                                                                                                                                                                                                                                                                                                                                                                                                                                                                                                                                                                                                                                                                                                                                                                                                                                                                                                                                                                                                                                                                                                                                                                                                                                                                                                                                                                                                                                                                                                                                                                                                                                                                                                                                                                                                                                                                                                                                                                                                                                                                                                                                                                                                                                                                                                                                                                                                                                                                                                                                                                                                                                                             | New South Wales Health Pathology Royal Prince Alfred Hospital                                       | Microbiology RPAH                                                                                                      | Foster, C.; Au, J.; Ruiz Silva, M.; Deveson, I.; Bull, R.; Van Hal, S.; Rawlinson, W.                                                                                                                                                                                    |                                                                                                                                                                                                                                                                                                   |
| EPI_ISL_1011697                                                                                                                                                                                                                                                                                                                                                                                                                                                                                                                                                                                                                                                                                                                                                                                                                                                                                                                                                                                                                                                                                                                                                                                                                                                                                                                                                                                                                                                                                                                                                                                                                                                                                                                                                                                                                                                                                                                                                                                                                                                                                                                                                                                                                                                                                                                                                                                                                                                                                                                                                                                                                                                                                                                                                                                                                                                                                                                                                                                                                                                                                                                                                                                                                                                                                                                                                                                                                                                                                                                                                                                                                                                                                                                                                                                                                                                                                                                               | Broad Institute Clinical Research Sequencing Platform                                               | Infectious Disease Program, Broad Institute of Harvard and MIT                                                         | Lemieux,J.E., Siddle,K.J., Adams,G., Gladden-Young,A., Lagerborg,K., Rudy,M., DeRuff,K., Carter,A., Normandin,E., Bauer,M., Reilly,S., Tomkins-Tinch,C., Loreth,C., Chaluvasi,S., Birren,B.W., Gallagher,G., Smole,S., Park,D.J., MacInnis,B.L., and Sabeti,P.C.         |                                                                                                                                                                                                                                                                                                   |
| EPI_ISL_1011758, EPI_ISL_1011761, EPI_ISL_1011762, EPI_ISL_1011763, EPI_ISL_1011764, EPI_ISL_1011765, EPI_ISL_1011767, EPI_ISL_1011768, EPI_ISL_1011770, EPI_ISL_1011771, EPI_ISL_1011772, EPI_ISL_1011773, EPI_ISL_1011774, EPI_ISL_1011776, EPI_ISL_1011777, EPI_ISL_1011778, EPI_ISL_1011781, EPI_ISL_1011785, EPI_ISL_1011788, EPI_ISL_1011790, EPI_ISL_1011791, EPI_ISL_1011793, EPI_ISL_1011795, EPI_ISL_1011796, EPI_ISL_1011797, EPI_ISL_1011798, EPI_ISL_1011801, EPI_ISL_1011805, EPI_ISL_1011806, EPI_ISL_1011807, EPI_ISL_1011810, EPI_ISL_1011811, EPI_ISL_1011813, EPI_ISL_1011815, EPI_ISL_1011817, EPI_ISL_1011820, EPI_ISL_1011822, EPI_ISL_1011824, EPI_ISL_1011826, EPI_ISL_1011828, EPI_ISL_1011829, EPI_ISL_1011830, EPI_ISL_1011831, EPI_ISL_1011832, EPI_ISL_1011833, EPI_ISL_1011834, EPI_ISL_1011837, EPI_ISL_1011839, EPI_ISL_1011840, EPI_ISL_1011841, EPI_ISL_1011842, EPI_ISL_1011843, EPI_ISL_1011844, EPI_ISL_1011846, EPI_ISL_1011847, EPI_ISL_1011848, EPI_ISL_1011849, EPI_ISL_1011850, EPI_ISL_1011851, EPI_ISL_1011852, EPI_ISL_1011853, EPI_ISL_1011854, EPI_ISL_1011855, EPI_ISL_1011857, EPI_ISL_1011858, EPI_ISL_1011859, EPI_ISL_1011860, EPI_ISL_1011861, EPI_ISL_1011862, EPI_ISL_1011865, EPI_ISL_1011867, EPI_ISL_1011869, EPI_ISL_1011870, EPI_ISL_1011873, EPI_ISL_1011874, EPI_ISL_1011876, EPI_ISL_1011877, EPI_ISL_1011878, EPI_ISL_1011881, EPI_ISL_1011882, EPI_ISL_1011883, EPI_ISL_1011885, EPI_ISL_1011887, EPI_ISL_1011889, EPI_ISL_1011890, EPI_ISL_1011891, EPI_ISL_1011892, EPI_ISL_1011893, EPI_ISL_1011894, EPI_ISL_1011897, EPI_ISL_1011898, EPI_ISL_1011900, EPI_ISL_1011901, EPI_ISL_1011902, EPI_ISL_1011903, EPI_ISL_1011906, EPI_ISL_1011907, EPI_ISL_1011908, EPI_ISL_1011909, EPI_ISL_1011910, EPI_ISL_1011911, EPI_ISL_1011912, EPI_ISL_1011913, EPI_ISL_1011914, EPI_ISL_1011915, EPI_ISL_1011916, EPI_ISL_1011917, EPI_ISL_1011919, EPI_ISL_1011921, EPI_ISL_1011922, EPI_ISL_1011923, EPI_ISL_1011926, EPI_ISL_1011927, EPI_ISL_1011929, EPI_ISL_1011931, EPI_ISL_1011932, EPI_ISL_1011933, EPI_ISL_1011934, EPI_ISL_1011935, EPI_ISL_1011936, EPI_ISL_1011937, EPI_ISL_1011938, EPI_ISL_1011939, EPI_ISL_1011942, EPI_ISL_1011943, EPI_ISL_1011944, EPI_ISL_1011945, EPI_ISL_1011946, EPI_ISL_1011947, EPI_ISL_1011948, EPI_ISL_1011951, EPI_ISL_1011954, EPI_ISL_1011955, EPI_ISL_1011956, EPI_ISL_1011957, EPI_ISL_1011958, EPI_ISL_1011959, EPI_ISL_1011961, EPI_ISL_1011964, EPI_ISL_1011967, EPI_ISL_1011968, EPI_ISL_1011970, EPI_ISL_1011971, EPI_ISL_1011972, EPI_ISL_1011974, EPI_ISL_1011975, EPI_ISL_1011977, EPI_ISL_1011978, EPI_ISL_1011979, EPI_ISL_1011980, EPI_ISL_1011981, EPI_ISL_1011982, EPI_ISL_1011985, EPI_ISL_1011986, EPI_ISL_1011988, EPI_ISL_1011989, EPI_ISL_1011990, EPI_ISL_1011995, EPI_ISL_1011996, EPI_ISL_1011998, EPI_ISL_1012001, EPI_ISL_1012002, EPI_ISL_1012003, EPI_ISL_1012004, EPI_ISL_1012006, EPI_ISL_1012007, EPI_ISL_1012008, EPI_ISL_1012009, EPI_ISL_1012010, EPI_ISL_1012012, EPI_ISL_1012013, EPI_ISL_1012015, EPI_ISL_1012018, EPI_ISL_1012019, EPI_ISL_1012020, EPI_ISL_1012021, EPI_ISL_1012022, EPI_ISL_1012024, EPI_ISL_1012025, EPI_ISL_1012027, EPI_ISL_1012028, EPI_ISL_1012029, EPI_ISL_1012030, EPI_ISL_1012031, EPI_ISL_1012032, EPI_ISL_1012034, EPI_ISL_1012036, EPI_ISL_1012037, EPI_ISL_1012039, EPI_ISL_1012043, EPI_ISL_1012046, EPI_ISL_1012047, EPI_ISL_1012048, EPI_ISL_1012049, EPI_ISL_1012050, EPI_ISL_1012051, EPI_ISL_1012052, EPI_ISL_1012055, EPI_ISL_1012056, EPI_ISL_1012057, EPI_ISL_1012062, EPI_ISL_1012064, EPI_ISL_1012067, EPI_ISL_1012068, EPI_ISL_1012069, EPI_ISL_1012073, EPI_ISL_1012074, EPI_ISL_1012076, EPI_ISL_1012078, EPI_ISL_1012079, EPI_ISL_1012080, EPI_ISL_1012082, EPI_ISL_1012083, EPI_ISL_1012084, EPI_ISL_1012085, EPI_ISL_1012086, EPI_ISL_1012087, EPI_ISL_1012089, EPI_ISL_1012091, EPI_ISL_1012092, EPI_ISL_1012093, EPI_ISL_1012096, EPI_ISL_1012097 | see above                                                                                           | Lighthouse Lab in Alderley Park                                                                                        | Wellcome Sanger Institute for the COVID-19 Genomics UK (COG-UK) Consortium                                                                                                                                                                                               | Jacquelyn Wynn, Mairead Hyland, The Lighthouse Lab in Alderley Park and Alex Alderton, Roberto Amato, Sonia Goncalves, Ewan Harrison, David K. Jackson, Ian Johnston, Dominic Kwiatkowski, Cordelia Langford, John Sillitoe on behalf of the Wellcome Sanger Institute COVID-19 Surveillance Team |
| EPI_ISL_1012099, EPI_ISL_1012101, EPI_ISL_1012102, EPI_ISL_1012103, EPI_ISL_1012104, EPI_ISL_1012106, EPI_ISL_1012108, EPI_ISL_1012109, EPI_ISL_1012110, EPI_ISL_1012111, EPI_ISL_1012113, EPI_ISL_1012114, EPI_ISL_1012115, EPI_ISL_1012116, EPI_ISL_1012118, EPI_ISL_1012119, EPI_ISL_1012121, EPI_ISL_1012122, EPI_ISL_1012123, EPI_ISL_1012124, EPI_ISL_1012125, EPI_ISL_1012126, EPI_ISL_1012127, EPI_ISL_1012129, EPI_ISL_1012130, EPI_ISL_1012131, EPI_ISL_1012132, EPI_ISL_1012136, EPI_ISL_1012139, EPI_ISL_1012140, EPI_ISL_1012142, EPI_ISL_1012143, EPI_ISL_1012146, EPI_ISL_1012147, EPI_ISL_1012148, EPI_ISL_1012149, EPI_ISL_1012150, EPI_ISL_1012151, EPI_ISL_1012152, EPI_ISL_1012153, EPI_ISL_1012154, EPI_ISL_1012155, EPI_ISL_1012157, EPI_ISL_1012158, EPI_ISL_1012159, EPI_ISL_1012160, EPI_ISL_1012162, EPI_ISL_1012163, EPI_ISL_1012164, EPI_ISL_1012165, EPI_ISL_1012166, EPI_ISL_1012168, EPI_ISL_1012171, EPI_ISL_1012172, EPI_ISL_1012173, EPI_ISL_1012174, EPI_ISL_1012175, EPI_ISL_1012177, EPI_ISL_1012178, EPI_ISL_1012181, EPI_ISL_1012182, EPI_ISL_1012183, EPI_ISL_1012184, EPI_ISL_1012185, EPI_ISL_1012186, EPI_ISL_1012187, EPI_ISL_1012188, EPI_ISL_1012189, EPI_ISL_1012190, EPI_ISL_1012191, EPI_ISL_1012192, EPI_ISL_1012193, EPI_ISL_1012194, EPI_ISL_1012195, EPI_ISL_1012198, EPI_ISL_1012199, EPI_ISL_1012200, EPI_ISL_1012202, EPI_ISL_1012204, EPI_ISL_1012205, EPI_ISL_1012220, EPI_ISL_1012221, EPI_ISL_1012222, EPI_ISL_1012223, EPI_ISL_1012224, EPI_ISL_1012225, EPI_ISL_1012227, EPI_ISL_1012228, EPI_ISL_1012229, EPI_ISL_1012230, EPI_ISL_1012232, EPI_ISL_1012233, EPI_ISL_1012236, EPI_ISL_1012238, EPI_ISL_1012240, EPI_ISL_1012241, EPI_ISL_1012242, EPI_ISL_1012244, EPI_ISL_1012245, EPI_ISL_1012247, EPI_ISL_1012248, EPI_ISL_1012249, EPI_ISL_1012250, EPI_ISL_1012251, EPI_ISL_1012253, EPI_ISL_1012254, EPI_ISL_1012256, EPI_ISL_1012257, EPI_ISL_1012275, EPI_ISL_1012277, EPI_ISL_1012278, EPI_ISL_1012279, EPI_ISL_1012281, EPI_ISL_1012283, EPI_ISL_1012284, EPI_ISL_1012289, EPI_ISL_1012291, EPI_ISL_1012295, EPI_ISL_1012296, EPI_ISL_1012297, EPI_ISL_1012299, EPI_ISL_1012301, EPI_ISL_1012303, EPI_ISL_1012304, EPI_ISL_1012305, EPI_ISL_1012306, EPI_ISL_1012308, EPI_ISL_1012310, EPI_ISL_1012311, EPI_ISL_1012313, EPI_ISL_1012315, EPI_ISL_1012316, EPI_ISL_1012317, EPI_ISL_1012319, EPI_ISL_1012320, EPI_ISL_1012321, EPI_ISL_1012323, EPI_ISL_1012324, EPI_ISL_1012325, EPI_ISL_1012327, EPI_ISL_1012328, EPI_ISL_1012329, EPI_ISL_1012331, EPI_ISL_1012332, EPI_ISL_1012333, EPI_ISL_1012334, EPI_ISL_1012335, EPI_ISL_1012336, EPI_ISL_1012337, EPI_ISL_1012338, EPI_ISL_1012339, EPI_ISL_1012340, EPI_ISL_1012342, EPI_ISL_1012343, EPI_ISL_1012344, EPI_ISL_1012346, EPI_ISL_1012349, EPI_ISL_1012350, EPI_ISL_1012351, EPI_ISL_1012352, EPI_ISL_1012353, EPI_ISL_1012356, EPI_ISL_1012357, EPI_ISL_1012359, EPI_ISL_1012360, EPI_ISL_1012361, EPI_ISL_1012362, EPI_ISL_1012365, EPI_ISL_1012367, EPI_ISL_1012368, EPI_ISL_1012369, EPI_ISL_1012371, EPI_ISL_1012373, EPI_ISL_1012375, EPI_ISL_1012377, EPI_ISL_1012379, EPI_ISL_1012380, EPI_ISL_1012382, EPI_ISL_1012383, EPI_ISL_1012384, EPI_ISL_1012385, EPI_ISL_1012386, EPI_ISL_1012390, EPI_ISL_1012391, EPI_ISL_1012393, EPI_ISL_1012394, EPI_ISL_1012395, EPI_ISL_1012396, EPI_ISL_1012397, EPI_ISL_1012399, EPI_ISL_1012400, EPI_ISL_1012401, EPI_ISL_1012402                                                                                                                                                                                                                                                                                                                                                                                                                                                                                                                               | see above                                                                                           | Lighthouse Lab in Cambridge                                                                                            | Wellcome Sanger Institute for the COVID-19 Genomics UK (COG-UK) Consortium                                                                                                                                                                                               | Rob Howes, The Lighthouse Lab in Cambridge and Alex Alderton, Roberto Amato, Sonia Goncalves, Ewan Harrison, David K. Jackson, Ian Johnston, Dominic Kwiatkowski, Cordelia Langford, John Sillitoe on behalf of the Wellcome Sanger Institute COVID-19 Surveillance Team                          |
| EPI_ISL_1012404                                                                                                                                                                                                                                                                                                                                                                                                                                                                                                                                                                                                                                                                                                                                                                                                                                                                                                                                                                                                                                                                                                                                                                                                                                                                                                                                                                                                                                                                                                                                                                                                                                                                                                                                                                                                                                                                                                                                                                                                                                                                                                                                                                                                                                                                                                                                                                                                                                                                                                                                                                                                                                                                                                                                                                                                                                                                                                                                                                                                                                                                                                                                                                                                                                                                                                                                                                                                                                                                                                                                                                                                                                                                                                                                                                                                                                                                                                                               | Lighthouse Lab in Milton Keynes                                                                     | Wellcome Sanger Institute for the COVID-19 Genomics UK (COG-UK) Consortium                                             | The Lighthouse Lab in Milton Keynes and Alex Alderton, Roberto Amato, Sonia Goncalves, Ewan Harrison, David K. Jackson, Ian Johnston, Dominic Kwiatkowski, Cordelia Langford, John Sillitoe on behalf of the Wellcome Sanger Institute COVID-19 Surveillance Team        |                                                                                                                                                                                                                                                                                                   |
| EPI_ISL_1012409                                                                                                                                                                                                                                                                                                                                                                                                                                                                                                                                                                                                                                                                                                                                                                                                                                                                                                                                                                                                                                                                                                                                                                                                                                                                                                                                                                                                                                                                                                                                                                                                                                                                                                                                                                                                                                                                                                                                                                                                                                                                                                                                                                                                                                                                                                                                                                                                                                                                                                                                                                                                                                                                                                                                                                                                                                                                                                                                                                                                                                                                                                                                                                                                                                                                                                                                                                                                                                                                                                                                                                                                                                                                                                                                                                                                                                                                                                                               | Lighthouse Lab in Cambridge                                                                         | Wellcome Sanger Institute for the COVID-19 Genomics UK (COG-UK) Consortium                                             | Rob Howes, The Lighthouse Lab in Cambridge and Alex Alderton, Roberto Amato, Sonia Goncalves, Ewan Harrison, David K. Jackson, Ian Johnston, Dominic Kwiatkowski, Cordelia Langford, John Sillitoe on behalf of the Wellcome Sanger Institute COVID-19 Surveillance Team |                                                                                                                                                                                                                                                                                                   |
| EPI_ISL_1012412, EPI_ISL_1012413, EPI_ISL_1012415                                                                                                                                                                                                                                                                                                                                                                                                                                                                                                                                                                                                                                                                                                                                                                                                                                                                                                                                                                                                                                                                                                                                                                                                                                                                                                                                                                                                                                                                                                                                                                                                                                                                                                                                                                                                                                                                                                                                                                                                                                                                                                                                                                                                                                                                                                                                                                                                                                                                                                                                                                                                                                                                                                                                                                                                                                                                                                                                                                                                                                                                                                                                                                                                                                                                                                                                                                                                                                                                                                                                                                                                                                                                                                                                                                                                                                                                                             | Lighthouse Lab in Milton Keynes                                                                     | Wellcome Sanger Institute for the COVID-19 Genomics UK (COG-UK) Consortium                                             | The Lighthouse Lab in Milton Keynes and Alex Alderton, Roberto Amato, Sonia Goncalves, Ewan Harrison, David K. Jackson, Ian Johnston, Dominic Kwiatkowski, Cordelia Langford, John Sillitoe on behalf of the Wellcome Sanger Institute COVID-19 Surveillance Team        |                                                                                                                                                                                                                                                                                                   |
| EPI_ISL_1012416                                                                                                                                                                                                                                                                                                                                                                                                                                                                                                                                                                                                                                                                                                                                                                                                                                                                                                                                                                                                                                                                                                                                                                                                                                                                                                                                                                                                                                                                                                                                                                                                                                                                                                                                                                                                                                                                                                                                                                                                                                                                                                                                                                                                                                                                                                                                                                                                                                                                                                                                                                                                                                                                                                                                                                                                                                                                                                                                                                                                                                                                                                                                                                                                                                                                                                                                                                                                                                                                                                                                                                                                                                                                                                                                                                                                                                                                                                                               | Lighthouse Lab in Cambridge                                                                         | Wellcome Sanger Institute for the COVID-19 Genomics UK (COG-UK) Consortium                                             | Rob Howes, The Lighthouse Lab in Cambridge and Alex Alderton, Roberto Amato, Sonia Goncalves, Ewan Harrison, David K. Jackson, Ian Johnston, Dominic Kwiatkowski, Cordelia Langford, John Sillitoe on behalf of the Wellcome Sanger Institute COVID-19 Surveillance Team |                                                                                                                                                                                                                                                                                                   |
| EPI_ISL_1012417, EPI_ISL_1012420, EPI_ISL_1012422, EPI_ISL_1012425, EPI_ISL_1012426, EPI_ISL_1012427, EPI_ISL_1012432, EPI_ISL_1012433, EPI_ISL_1012434, EPI_ISL_1012435, EPI_ISL_1012436, EPI_ISL_1012440, EPI_ISL_1012441, EPI_ISL_1012442, EPI_ISL_1012443, EPI_ISL_1012444, EPI_ISL_1012445, EPI_ISL_1012447, EPI_ISL_1012452, EPI_ISL_1012455                                                                                                                                                                                                                                                                                                                                                                                                                                                                                                                                                                                                                                                                                                                                                                                                                                                                                                                                                                                                                                                                                                                                                                                                                                                                                                                                                                                                                                                                                                                                                                                                                                                                                                                                                                                                                                                                                                                                                                                                                                                                                                                                                                                                                                                                                                                                                                                                                                                                                                                                                                                                                                                                                                                                                                                                                                                                                                                                                                                                                                                                                                                                                                                                                                                                                                                                                                                                                                                                                                                                                                                            | see above                                                                                           | Lighthouse Lab in Milton Keynes                                                                                        | Wellcome Sanger Institute for the COVID-19 Genomics UK (COG-UK) Consortium                                                                                                                                                                                               | The Lighthouse Lab in Milton Keynes and Alex Alderton, Roberto Amato, Sonia Goncalves, Ewan Harrison, David K. Jackson, Ian Johnston, Dominic Kwiatkowski, Cordelia Langford, John Sillitoe on behalf of the Wellcome Sanger Institute COVID-19 Surveillance Team                                 |
| EPI_ISL_1012458                                                                                                                                                                                                                                                                                                                                                                                                                                                                                                                                                                                                                                                                                                                                                                                                                                                                                                                                                                                                                                                                                                                                                                                                                                                                                                                                                                                                                                                                                                                                                                                                                                                                                                                                                                                                                                                                                                                                                                                                                                                                                                                                                                                                                                                                                                                                                                                                                                                                                                                                                                                                                                                                                                                                                                                                                                                                                                                                                                                                                                                                                                                                                                                                                                                                                                                                                                                                                                                                                                                                                                                                                                                                                                                                                                                                                                                                                                                               | Lighthouse Lab in Cambridge                                                                         | Wellcome Sanger Institute for the COVID-19 Genomics UK (COG-UK) Consortium                                             | Rob Howes, The Lighthouse Lab in Cambridge and Alex Alderton, Roberto Amato, Sonia Goncalves, Ewan Harrison, David K. Jackson, Ian Johnston, Dominic Kwiatkowski, Cordelia Langford, John Sillitoe on behalf of the Wellcome Sanger Institute COVID-19 Surveillance Team |                                                                                                                                                                                                                                                                                                   |
| EPI_ISL_1012459, EPI_ISL_1012460, EPI_ISL_1012461, EPI_ISL_1012462, EPI_ISL_1012463, EPI_ISL_1012464, EPI_ISL_1012467, EPI_ISL_1012471, EPI_ISL_1012472, EPI_ISL_1012473, EPI_ISL_1012474, EPI_ISL_1012475, EPI_ISL_1012476, EPI_ISL_1012478, EPI_ISL_1012479, EPI_ISL_1012483, EPI_ISL_1012486, EPI_ISL_1012487, EPI_ISL_1012488, EPI_ISL_1012489, EPI_ISL_1012490, EPI_ISL_1012491, EPI_ISL_1012492, EPI_ISL_1012494, EPI_ISL_1012495, EPI_ISL_1012497                                                                                                                                                                                                                                                                                                                                                                                                                                                                                                                                                                                                                                                                                                                                                                                                                                                                                                                                                                                                                                                                                                                                                                                                                                                                                                                                                                                                                                                                                                                                                                                                                                                                                                                                                                                                                                                                                                                                                                                                                                                                                                                                                                                                                                                                                                                                                                                                                                                                                                                                                                                                                                                                                                                                                                                                                                                                                                                                                                                                                                                                                                                                                                                                                                                                                                                                                                                                                                                                                      | see above                                                                                           | Lighthouse Lab in Milton Keynes                                                                                        | Wellcome Sanger Institute for the COVID-19 Genomics UK (COG-UK) Consortium                                                                                                                                                                                               | The Lighthouse Lab in Milton Keynes and Alex Alderton, Roberto Amato, Sonia Goncalves, Ewan Harrison, David K. Jackson, Ian Johnston, Dominic Kwiatkowski, Cordelia Langford, John Sillitoe on behalf of the Wellcome Sanger Institute COVID-19 Surveillance Team                                 |

|                                                                                                                                                                                                                                                                                                                                                                                                                                                                                                                                                                                                                                                                                                                                                                                                                                                                                                                                                                                                                                                                                                                                                                                                                                                                                                                                                                                                                                                                                                                                                                                                                                                                                                                                                                                                                                                                                                                                                                                                                                                                                                                                                                                                                                                                                                                                                                                                                                                                                                                                                                                                                                                                                                                                                                                                                                                                                                                                                                                                                                                                                                                                                                                                                                                                                                                                                                                                                                                                                                                                                                                                                                                                                                                                                                                                                                                                                                                                                                                                                                                                                                                                                                                                                                                                                                                                                                                                                                                                                                                                                                                                                                                                                                                                                                                                                                                                                                                                       |                                                                                                                                                                                            |                                                                                          |                                                                                                                                                                                                                                                                                                   |
|---------------------------------------------------------------------------------------------------------------------------------------------------------------------------------------------------------------------------------------------------------------------------------------------------------------------------------------------------------------------------------------------------------------------------------------------------------------------------------------------------------------------------------------------------------------------------------------------------------------------------------------------------------------------------------------------------------------------------------------------------------------------------------------------------------------------------------------------------------------------------------------------------------------------------------------------------------------------------------------------------------------------------------------------------------------------------------------------------------------------------------------------------------------------------------------------------------------------------------------------------------------------------------------------------------------------------------------------------------------------------------------------------------------------------------------------------------------------------------------------------------------------------------------------------------------------------------------------------------------------------------------------------------------------------------------------------------------------------------------------------------------------------------------------------------------------------------------------------------------------------------------------------------------------------------------------------------------------------------------------------------------------------------------------------------------------------------------------------------------------------------------------------------------------------------------------------------------------------------------------------------------------------------------------------------------------------------------------------------------------------------------------------------------------------------------------------------------------------------------------------------------------------------------------------------------------------------------------------------------------------------------------------------------------------------------------------------------------------------------------------------------------------------------------------------------------------------------------------------------------------------------------------------------------------------------------------------------------------------------------------------------------------------------------------------------------------------------------------------------------------------------------------------------------------------------------------------------------------------------------------------------------------------------------------------------------------------------------------------------------------------------------------------------------------------------------------------------------------------------------------------------------------------------------------------------------------------------------------------------------------------------------------------------------------------------------------------------------------------------------------------------------------------------------------------------------------------------------------------------------------------------------------------------------------------------------------------------------------------------------------------------------------------------------------------------------------------------------------------------------------------------------------------------------------------------------------------------------------------------------------------------------------------------------------------------------------------------------------------------------------------------------------------------------------------------------------------------------------------------------------------------------------------------------------------------------------------------------------------------------------------------------------------------------------------------------------------------------------------------------------------------------------------------------------------------------------------------------------------------------------------------------------------------------------------------|--------------------------------------------------------------------------------------------------------------------------------------------------------------------------------------------|------------------------------------------------------------------------------------------|---------------------------------------------------------------------------------------------------------------------------------------------------------------------------------------------------------------------------------------------------------------------------------------------------|
| EPI_ISL_1012499                                                                                                                                                                                                                                                                                                                                                                                                                                                                                                                                                                                                                                                                                                                                                                                                                                                                                                                                                                                                                                                                                                                                                                                                                                                                                                                                                                                                                                                                                                                                                                                                                                                                                                                                                                                                                                                                                                                                                                                                                                                                                                                                                                                                                                                                                                                                                                                                                                                                                                                                                                                                                                                                                                                                                                                                                                                                                                                                                                                                                                                                                                                                                                                                                                                                                                                                                                                                                                                                                                                                                                                                                                                                                                                                                                                                                                                                                                                                                                                                                                                                                                                                                                                                                                                                                                                                                                                                                                                                                                                                                                                                                                                                                                                                                                                                                                                                                                                       | Lighthouse Lab in Cambridge                                                                                                                                                                | Wellcome Sanger Institute for the COVID-19 Genomics UK (COG-UK) Consortium               | Rob Howes, The Lighthouse Lab in Cambridge and Alex Alderton, Roberto Amato, Sonia Goncalves, Ewan Harrison, David K. Jackson, Ian Johnston, Dominic Kwiatkowski, Cordelia Langford, John Sillitoe on behalf of the Wellcome Sanger Institute COVID-19 Surveillance Team                          |
| EPI_ISL_1012502, EPI_ISL_1012504, EPI_ISL_1012505, EPI_ISL_1012507, EPI_ISL_1012511, EPI_ISL_1012516, EPI_ISL_1012517, EPI_ISL_1012518, EPI_ISL_1012519, EPI_ISL_1012522, EPI_ISL_1012524, EPI_ISL_1012525, EPI_ISL_1012526, EPI_ISL_1012528, EPI_ISL_1012529, EPI_ISL_1012530, EPI_ISL_1012533, EPI_ISL_1012535, EPI_ISL_1012536, EPI_ISL_1012538, EPI_ISL_1012542, EPI_ISL_1012544, EPI_ISL_1012546, EPI_ISL_1012547, EPI_ISL_1012548                                                                                                                                                                                                                                                                                                                                                                                                                                                                                                                                                                                                                                                                                                                                                                                                                                                                                                                                                                                                                                                                                                                                                                                                                                                                                                                                                                                                                                                                                                                                                                                                                                                                                                                                                                                                                                                                                                                                                                                                                                                                                                                                                                                                                                                                                                                                                                                                                                                                                                                                                                                                                                                                                                                                                                                                                                                                                                                                                                                                                                                                                                                                                                                                                                                                                                                                                                                                                                                                                                                                                                                                                                                                                                                                                                                                                                                                                                                                                                                                                                                                                                                                                                                                                                                                                                                                                                                                                                                                                               |                                                                                                                                                                                            |                                                                                          |                                                                                                                                                                                                                                                                                                   |
| see above                                                                                                                                                                                                                                                                                                                                                                                                                                                                                                                                                                                                                                                                                                                                                                                                                                                                                                                                                                                                                                                                                                                                                                                                                                                                                                                                                                                                                                                                                                                                                                                                                                                                                                                                                                                                                                                                                                                                                                                                                                                                                                                                                                                                                                                                                                                                                                                                                                                                                                                                                                                                                                                                                                                                                                                                                                                                                                                                                                                                                                                                                                                                                                                                                                                                                                                                                                                                                                                                                                                                                                                                                                                                                                                                                                                                                                                                                                                                                                                                                                                                                                                                                                                                                                                                                                                                                                                                                                                                                                                                                                                                                                                                                                                                                                                                                                                                                                                             | Lighthouse Lab in Milton Keynes                                                                                                                                                            | Wellcome Sanger Institute for the COVID-19 Genomics UK (COG-UK) Consortium               | The Lighthouse Lab in Milton Keynes and Alex Alderton, Roberto Amato, Sonia Goncalves, Ewan Harrison, David K. Jackson, Ian Johnston, Dominic Kwiatkowski, Cordelia Langford, John Sillitoe on behalf of the Wellcome Sanger Institute COVID-19 Surveillance Team                                 |
| EPI_ISL_1012549                                                                                                                                                                                                                                                                                                                                                                                                                                                                                                                                                                                                                                                                                                                                                                                                                                                                                                                                                                                                                                                                                                                                                                                                                                                                                                                                                                                                                                                                                                                                                                                                                                                                                                                                                                                                                                                                                                                                                                                                                                                                                                                                                                                                                                                                                                                                                                                                                                                                                                                                                                                                                                                                                                                                                                                                                                                                                                                                                                                                                                                                                                                                                                                                                                                                                                                                                                                                                                                                                                                                                                                                                                                                                                                                                                                                                                                                                                                                                                                                                                                                                                                                                                                                                                                                                                                                                                                                                                                                                                                                                                                                                                                                                                                                                                                                                                                                                                                       | Lighthouse Lab in Cambridge                                                                                                                                                                | Wellcome Sanger Institute for the COVID-19 Genomics UK (COG-UK) Consortium               | Rob Howes, The Lighthouse Lab in Cambridge and Alex Alderton, Roberto Amato, Sonia Goncalves, Ewan Harrison, David K. Jackson, Ian Johnston, Dominic Kwiatkowski, Cordelia Langford, John Sillitoe on behalf of the Wellcome Sanger Institute COVID-19 Surveillance Team                          |
| EPI_ISL_1012551, EPI_ISL_1012552, EPI_ISL_1012553, EPI_ISL_1012554, EPI_ISL_1012556, EPI_ISL_1012559, EPI_ISL_1012561, EPI_ISL_1012563, EPI_ISL_1012566, EPI_ISL_1012568, EPI_ISL_1012569, EPI_ISL_1012571, EPI_ISL_1012573, EPI_ISL_1012574, EPI_ISL_1012575, EPI_ISL_1012577, EPI_ISL_1012578, EPI_ISL_1012579, EPI_ISL_1012580, EPI_ISL_1012581, EPI_ISL_1012588, EPI_ISL_1012593, EPI_ISL_1012599, EPI_ISL_1012603, EPI_ISL_1012604, EPI_ISL_1012606                                                                                                                                                                                                                                                                                                                                                                                                                                                                                                                                                                                                                                                                                                                                                                                                                                                                                                                                                                                                                                                                                                                                                                                                                                                                                                                                                                                                                                                                                                                                                                                                                                                                                                                                                                                                                                                                                                                                                                                                                                                                                                                                                                                                                                                                                                                                                                                                                                                                                                                                                                                                                                                                                                                                                                                                                                                                                                                                                                                                                                                                                                                                                                                                                                                                                                                                                                                                                                                                                                                                                                                                                                                                                                                                                                                                                                                                                                                                                                                                                                                                                                                                                                                                                                                                                                                                                                                                                                                                              |                                                                                                                                                                                            |                                                                                          |                                                                                                                                                                                                                                                                                                   |
| see above                                                                                                                                                                                                                                                                                                                                                                                                                                                                                                                                                                                                                                                                                                                                                                                                                                                                                                                                                                                                                                                                                                                                                                                                                                                                                                                                                                                                                                                                                                                                                                                                                                                                                                                                                                                                                                                                                                                                                                                                                                                                                                                                                                                                                                                                                                                                                                                                                                                                                                                                                                                                                                                                                                                                                                                                                                                                                                                                                                                                                                                                                                                                                                                                                                                                                                                                                                                                                                                                                                                                                                                                                                                                                                                                                                                                                                                                                                                                                                                                                                                                                                                                                                                                                                                                                                                                                                                                                                                                                                                                                                                                                                                                                                                                                                                                                                                                                                                             | Lighthouse Lab in Alderley Park                                                                                                                                                            | Wellcome Sanger Institute for the COVID-19 Genomics UK (COG-UK) Consortium               | Jacquelyn Wynn, Mairead Hyland, The Lighthouse Lab in Alderley Park and Alex Alderton, Roberto Amato, Sonia Goncalves, Ewan Harrison, David K. Jackson, Ian Johnston, Dominic Kwiatkowski, Cordelia Langford, John Sillitoe on behalf of the Wellcome Sanger Institute COVID-19 Surveillance Team |
| EPI_ISL_1012611, EPI_ISL_1012613, EPI_ISL_1012616, EPI_ISL_1012617, EPI_ISL_1012625, EPI_ISL_1012628, EPI_ISL_1012641, EPI_ISL_1012643, EPI_ISL_1012644, EPI_ISL_1012645, EPI_ISL_1012653, EPI_ISL_1012655, EPI_ISL_1012657, EPI_ISL_1012661, EPI_ISL_1012663, EPI_ISL_1012665                                                                                                                                                                                                                                                                                                                                                                                                                                                                                                                                                                                                                                                                                                                                                                                                                                                                                                                                                                                                                                                                                                                                                                                                                                                                                                                                                                                                                                                                                                                                                                                                                                                                                                                                                                                                                                                                                                                                                                                                                                                                                                                                                                                                                                                                                                                                                                                                                                                                                                                                                                                                                                                                                                                                                                                                                                                                                                                                                                                                                                                                                                                                                                                                                                                                                                                                                                                                                                                                                                                                                                                                                                                                                                                                                                                                                                                                                                                                                                                                                                                                                                                                                                                                                                                                                                                                                                                                                                                                                                                                                                                                                                                        |                                                                                                                                                                                            |                                                                                          |                                                                                                                                                                                                                                                                                                   |
| see above                                                                                                                                                                                                                                                                                                                                                                                                                                                                                                                                                                                                                                                                                                                                                                                                                                                                                                                                                                                                                                                                                                                                                                                                                                                                                                                                                                                                                                                                                                                                                                                                                                                                                                                                                                                                                                                                                                                                                                                                                                                                                                                                                                                                                                                                                                                                                                                                                                                                                                                                                                                                                                                                                                                                                                                                                                                                                                                                                                                                                                                                                                                                                                                                                                                                                                                                                                                                                                                                                                                                                                                                                                                                                                                                                                                                                                                                                                                                                                                                                                                                                                                                                                                                                                                                                                                                                                                                                                                                                                                                                                                                                                                                                                                                                                                                                                                                                                                             | Lighthouse Lab in Cambridge                                                                                                                                                                | Wellcome Sanger Institute for the COVID-19 Genomics UK (COG-UK) Consortium               | Rob Howes, The Lighthouse Lab in Cambridge and Alex Alderton, Roberto Amato, Sonia Goncalves, Ewan Harrison, David K. Jackson, Ian Johnston, Dominic Kwiatkowski, Cordelia Langford, John Sillitoe on behalf of the Wellcome Sanger Institute COVID-19 Surveillance Team                          |
| EPI_ISL_1012669, EPI_ISL_1012670, EPI_ISL_1012671                                                                                                                                                                                                                                                                                                                                                                                                                                                                                                                                                                                                                                                                                                                                                                                                                                                                                                                                                                                                                                                                                                                                                                                                                                                                                                                                                                                                                                                                                                                                                                                                                                                                                                                                                                                                                                                                                                                                                                                                                                                                                                                                                                                                                                                                                                                                                                                                                                                                                                                                                                                                                                                                                                                                                                                                                                                                                                                                                                                                                                                                                                                                                                                                                                                                                                                                                                                                                                                                                                                                                                                                                                                                                                                                                                                                                                                                                                                                                                                                                                                                                                                                                                                                                                                                                                                                                                                                                                                                                                                                                                                                                                                                                                                                                                                                                                                                                     | Lighthouse Lab in Milton Keynes                                                                                                                                                            | Wellcome Sanger Institute for the COVID-19 Genomics UK (COG-UK) Consortium               | The Lighthouse Lab in Milton Keynes and Alex Alderton, Roberto Amato, Sonia Goncalves, Ewan Harrison, David K. Jackson, Ian Johnston, Dominic Kwiatkowski, Cordelia Langford, John Sillitoe on behalf of the Wellcome Sanger Institute COVID-19 Surveillance Team                                 |
| EPI_ISL_1012672, EPI_ISL_1012673, EPI_ISL_1012679, EPI_ISL_1012681, EPI_ISL_1012687, EPI_ISL_1012688, EPI_ISL_1012694                                                                                                                                                                                                                                                                                                                                                                                                                                                                                                                                                                                                                                                                                                                                                                                                                                                                                                                                                                                                                                                                                                                                                                                                                                                                                                                                                                                                                                                                                                                                                                                                                                                                                                                                                                                                                                                                                                                                                                                                                                                                                                                                                                                                                                                                                                                                                                                                                                                                                                                                                                                                                                                                                                                                                                                                                                                                                                                                                                                                                                                                                                                                                                                                                                                                                                                                                                                                                                                                                                                                                                                                                                                                                                                                                                                                                                                                                                                                                                                                                                                                                                                                                                                                                                                                                                                                                                                                                                                                                                                                                                                                                                                                                                                                                                                                                 | Lighthouse Lab in Alderley Park                                                                                                                                                            | Wellcome Sanger Institute for the COVID-19 Genomics UK (COG-UK) Consortium               | Jacquelyn Wynn, Mairead Hyland, The Lighthouse Lab in Alderley Park and Alex Alderton, Roberto Amato, Sonia Goncalves, Ewan Harrison, David K. Jackson, Ian Johnston, Dominic Kwiatkowski, Cordelia Langford, John Sillitoe on behalf of the Wellcome Sanger Institute COVID-19 Surveillance Team |
| EPI_ISL_1012889, EPI_ISL_1012894, EPI_ISL_1012905, EPI_ISL_1012906, EPI_ISL_1012909, EPI_ISL_1012910                                                                                                                                                                                                                                                                                                                                                                                                                                                                                                                                                                                                                                                                                                                                                                                                                                                                                                                                                                                                                                                                                                                                                                                                                                                                                                                                                                                                                                                                                                                                                                                                                                                                                                                                                                                                                                                                                                                                                                                                                                                                                                                                                                                                                                                                                                                                                                                                                                                                                                                                                                                                                                                                                                                                                                                                                                                                                                                                                                                                                                                                                                                                                                                                                                                                                                                                                                                                                                                                                                                                                                                                                                                                                                                                                                                                                                                                                                                                                                                                                                                                                                                                                                                                                                                                                                                                                                                                                                                                                                                                                                                                                                                                                                                                                                                                                                  | New Mexico Department of Health Scientific Laboratory                                                                                                                                      | New Mexico Department of Health Scientific Laboratory                                    | Ellie Johnson, Anastacia Griego-Fisher, D'eldra Malone, Jennifer Benoit                                                                                                                                                                                                                           |
| EPI_ISL_1012933, EPI_ISL_1012934, EPI_ISL_1012937, EPI_ISL_1012943, EPI_ISL_1012953, EPI_ISL_1012954, EPI_ISL_1012957, EPI_ISL_1012963, EPI_ISL_1012971, EPI_ISL_1012973, EPI_ISL_1012974, EPI_ISL_1012977, EPI_ISL_1012982, EPI_ISL_1012983, EPI_ISL_1012985, EPI_ISL_1012986, EPI_ISL_1012990, EPI_ISL_1012992, EPI_ISL_1013000, EPI_ISL_1013001                                                                                                                                                                                                                                                                                                                                                                                                                                                                                                                                                                                                                                                                                                                                                                                                                                                                                                                                                                                                                                                                                                                                                                                                                                                                                                                                                                                                                                                                                                                                                                                                                                                                                                                                                                                                                                                                                                                                                                                                                                                                                                                                                                                                                                                                                                                                                                                                                                                                                                                                                                                                                                                                                                                                                                                                                                                                                                                                                                                                                                                                                                                                                                                                                                                                                                                                                                                                                                                                                                                                                                                                                                                                                                                                                                                                                                                                                                                                                                                                                                                                                                                                                                                                                                                                                                                                                                                                                                                                                                                                                                                    |                                                                                                                                                                                            |                                                                                          |                                                                                                                                                                                                                                                                                                   |
| see above                                                                                                                                                                                                                                                                                                                                                                                                                                                                                                                                                                                                                                                                                                                                                                                                                                                                                                                                                                                                                                                                                                                                                                                                                                                                                                                                                                                                                                                                                                                                                                                                                                                                                                                                                                                                                                                                                                                                                                                                                                                                                                                                                                                                                                                                                                                                                                                                                                                                                                                                                                                                                                                                                                                                                                                                                                                                                                                                                                                                                                                                                                                                                                                                                                                                                                                                                                                                                                                                                                                                                                                                                                                                                                                                                                                                                                                                                                                                                                                                                                                                                                                                                                                                                                                                                                                                                                                                                                                                                                                                                                                                                                                                                                                                                                                                                                                                                                                             | Servicio de Microbiología, Laboratori Clínic Metropolitana Nord. Hospital Universitari Germans Trias i Pujol. Institut d'Investigació en Ciències de la Salut Germans Trias i Pujol (IGTP) | IrsiCaixa - Can Ruti CovidSeq                                                            | Marc Noguera-Julian, Mariona Parera, Maria Casadellà, Pilar Armengol, Francesc Catala-Moll, Roger Paredes, Bonaventura Clotet Elisa Martró, Verónica Saludes, Anna Not, Ana Pérez, Montserrat Giménez, Ignacio Blanco, Cristina Esteban, Cristina Casañ, Antoni E. Bordoy, Adrián Antuori         |
| EPI_ISL_1013210, EPI_ISL_1013211, EPI_ISL_1013212, EPI_ISL_1013213                                                                                                                                                                                                                                                                                                                                                                                                                                                                                                                                                                                                                                                                                                                                                                                                                                                                                                                                                                                                                                                                                                                                                                                                                                                                                                                                                                                                                                                                                                                                                                                                                                                                                                                                                                                                                                                                                                                                                                                                                                                                                                                                                                                                                                                                                                                                                                                                                                                                                                                                                                                                                                                                                                                                                                                                                                                                                                                                                                                                                                                                                                                                                                                                                                                                                                                                                                                                                                                                                                                                                                                                                                                                                                                                                                                                                                                                                                                                                                                                                                                                                                                                                                                                                                                                                                                                                                                                                                                                                                                                                                                                                                                                                                                                                                                                                                                                    | Hôpital Necker                                                                                                                                                                             | National Reference Center for Viruses of Respiratory Infections, Institut Pasteur, Paris | Marion Barbet, Sylvie Behillil, Méline Bizard, Angela Brisebarre, Camille Capel, Etienne Simon-Lorière, Vincent Enouf, Maud Vanpeene, Sylvie van der Werf, Fourgeaud Jacques                                                                                                                      |
| EPI_ISL_1013218, EPI_ISL_1013219, EPI_ISL_1013220, EPI_ISL_1013221                                                                                                                                                                                                                                                                                                                                                                                                                                                                                                                                                                                                                                                                                                                                                                                                                                                                                                                                                                                                                                                                                                                                                                                                                                                                                                                                                                                                                                                                                                                                                                                                                                                                                                                                                                                                                                                                                                                                                                                                                                                                                                                                                                                                                                                                                                                                                                                                                                                                                                                                                                                                                                                                                                                                                                                                                                                                                                                                                                                                                                                                                                                                                                                                                                                                                                                                                                                                                                                                                                                                                                                                                                                                                                                                                                                                                                                                                                                                                                                                                                                                                                                                                                                                                                                                                                                                                                                                                                                                                                                                                                                                                                                                                                                                                                                                                                                                    | Laboratoire de Microbiologie                                                                                                                                                               | National Reference Center for Viruses of Respiratory Infections, Institut Pasteur, Paris | Marion Barbet, Sylvie Behillil, Méline Bizard, Angela Brisebarre, Camille Capel, Etienne Simon-Lorière, Vincent Enouf, Maud Vanpeene, Sylvie van der Werf, Martres Pascale                                                                                                                        |
| EPI_ISL_1013222, EPI_ISL_1013223                                                                                                                                                                                                                                                                                                                                                                                                                                                                                                                                                                                                                                                                                                                                                                                                                                                                                                                                                                                                                                                                                                                                                                                                                                                                                                                                                                                                                                                                                                                                                                                                                                                                                                                                                                                                                                                                                                                                                                                                                                                                                                                                                                                                                                                                                                                                                                                                                                                                                                                                                                                                                                                                                                                                                                                                                                                                                                                                                                                                                                                                                                                                                                                                                                                                                                                                                                                                                                                                                                                                                                                                                                                                                                                                                                                                                                                                                                                                                                                                                                                                                                                                                                                                                                                                                                                                                                                                                                                                                                                                                                                                                                                                                                                                                                                                                                                                                                      | Service Biologie                                                                                                                                                                           | National Reference Center for Viruses of Respiratory Infections, Institut Pasteur, Paris | Marion Barbet, Sylvie Behillil, Méline Bizard, Angela Brisebarre, Camille Capel, Etienne Simon-Lorière, Vincent Enouf, Maud Vanpeene, Sylvie van der Werf, Marquie Juliet StéPhanie                                                                                                               |
| EPI_ISL_1013235                                                                                                                                                                                                                                                                                                                                                                                                                                                                                                                                                                                                                                                                                                                                                                                                                                                                                                                                                                                                                                                                                                                                                                                                                                                                                                                                                                                                                                                                                                                                                                                                                                                                                                                                                                                                                                                                                                                                                                                                                                                                                                                                                                                                                                                                                                                                                                                                                                                                                                                                                                                                                                                                                                                                                                                                                                                                                                                                                                                                                                                                                                                                                                                                                                                                                                                                                                                                                                                                                                                                                                                                                                                                                                                                                                                                                                                                                                                                                                                                                                                                                                                                                                                                                                                                                                                                                                                                                                                                                                                                                                                                                                                                                                                                                                                                                                                                                                                       | Hôpital Necker                                                                                                                                                                             | National Reference Center for Viruses of Respiratory Infections, Institut Pasteur, Paris | Marion Barbet, Sylvie Behillil, Méline Bizard, Angela Brisebarre, Camille Capel, Etienne Simon-Lorière, Vincent Enouf, Maud Vanpeene, Sylvie van der Werf, Fourgeaud Jacques                                                                                                                      |
| EPI_ISL_1013411, EPI_ISL_1013412, EPI_ISL_1013413, EPI_ISL_1013414                                                                                                                                                                                                                                                                                                                                                                                                                                                                                                                                                                                                                                                                                                                                                                                                                                                                                                                                                                                                                                                                                                                                                                                                                                                                                                                                                                                                                                                                                                                                                                                                                                                                                                                                                                                                                                                                                                                                                                                                                                                                                                                                                                                                                                                                                                                                                                                                                                                                                                                                                                                                                                                                                                                                                                                                                                                                                                                                                                                                                                                                                                                                                                                                                                                                                                                                                                                                                                                                                                                                                                                                                                                                                                                                                                                                                                                                                                                                                                                                                                                                                                                                                                                                                                                                                                                                                                                                                                                                                                                                                                                                                                                                                                                                                                                                                                                                    | CHU - Hôpital Cavale Blanche                                                                                                                                                               | National Reference Center for Viruses of Respiratory Infections, Institut Pasteur, Paris | Marion Barbet, Sylvie Behillil, Méline Bizard, Angela Brisebarre, Camille Capel, Etienne Simon-Lorière, Vincent Enouf, Maud Vanpeene, Sylvie van der Werf, Pilorge LéA                                                                                                                            |
| EPI_ISL_1013415                                                                                                                                                                                                                                                                                                                                                                                                                                                                                                                                                                                                                                                                                                                                                                                                                                                                                                                                                                                                                                                                                                                                                                                                                                                                                                                                                                                                                                                                                                                                                                                                                                                                                                                                                                                                                                                                                                                                                                                                                                                                                                                                                                                                                                                                                                                                                                                                                                                                                                                                                                                                                                                                                                                                                                                                                                                                                                                                                                                                                                                                                                                                                                                                                                                                                                                                                                                                                                                                                                                                                                                                                                                                                                                                                                                                                                                                                                                                                                                                                                                                                                                                                                                                                                                                                                                                                                                                                                                                                                                                                                                                                                                                                                                                                                                                                                                                                                                       | Hôpital Necker                                                                                                                                                                             | National Reference Center for Viruses of Respiratory Infections, Institut Pasteur, Paris | Marion Barbet, Sylvie Behillil, Méline Bizard, Angela Brisebarre, Camille Capel, Etienne Simon-Lorière, Vincent Enouf, Maud Vanpeene, Sylvie van der Werf, Fourgeaud Jacques                                                                                                                      |
| EPI_ISL_1013416                                                                                                                                                                                                                                                                                                                                                                                                                                                                                                                                                                                                                                                                                                                                                                                                                                                                                                                                                                                                                                                                                                                                                                                                                                                                                                                                                                                                                                                                                                                                                                                                                                                                                                                                                                                                                                                                                                                                                                                                                                                                                                                                                                                                                                                                                                                                                                                                                                                                                                                                                                                                                                                                                                                                                                                                                                                                                                                                                                                                                                                                                                                                                                                                                                                                                                                                                                                                                                                                                                                                                                                                                                                                                                                                                                                                                                                                                                                                                                                                                                                                                                                                                                                                                                                                                                                                                                                                                                                                                                                                                                                                                                                                                                                                                                                                                                                                                                                       | Hôpital Necker                                                                                                                                                                             | National Reference Center for Viruses of Respiratory Infections, Institut Pasteur, Paris | Marion Barbet, Sylvie Behillil, Méline Bizard, Angela Brisebarre, Camille Capel, Etienne Simon-Lorière, Vincent Enouf, Maud Vanpeene, Sylvie van der Werf, Lueruz-Ville Marianne                                                                                                                  |
| EPI_ISL_1013417                                                                                                                                                                                                                                                                                                                                                                                                                                                                                                                                                                                                                                                                                                                                                                                                                                                                                                                                                                                                                                                                                                                                                                                                                                                                                                                                                                                                                                                                                                                                                                                                                                                                                                                                                                                                                                                                                                                                                                                                                                                                                                                                                                                                                                                                                                                                                                                                                                                                                                                                                                                                                                                                                                                                                                                                                                                                                                                                                                                                                                                                                                                                                                                                                                                                                                                                                                                                                                                                                                                                                                                                                                                                                                                                                                                                                                                                                                                                                                                                                                                                                                                                                                                                                                                                                                                                                                                                                                                                                                                                                                                                                                                                                                                                                                                                                                                                                                                       | Institut Pasteur de Guadeloupe                                                                                                                                                             | National Reference Center for Viruses of Respiratory Infections, Institut Pasteur, Paris | Marion Barbet, Sylvie Behillil, Méline Bizard, Angela Brisebarre, Camille Capel, Etienne Simon-Lorière, Vincent Enouf, Maud Vanpeene, Sylvie van der Werf, Talarmin Antoine                                                                                                                       |
| EPI_ISL_1013488                                                                                                                                                                                                                                                                                                                                                                                                                                                                                                                                                                                                                                                                                                                                                                                                                                                                                                                                                                                                                                                                                                                                                                                                                                                                                                                                                                                                                                                                                                                                                                                                                                                                                                                                                                                                                                                                                                                                                                                                                                                                                                                                                                                                                                                                                                                                                                                                                                                                                                                                                                                                                                                                                                                                                                                                                                                                                                                                                                                                                                                                                                                                                                                                                                                                                                                                                                                                                                                                                                                                                                                                                                                                                                                                                                                                                                                                                                                                                                                                                                                                                                                                                                                                                                                                                                                                                                                                                                                                                                                                                                                                                                                                                                                                                                                                                                                                                                                       | Department of Medical Microbiology - section Molde, Molde Hospital                                                                                                                         | Norwegian Institute of Public Health, Department of Virology                             | Kathrine Stene-Johansen, Kamilla Heddeland Instefjord, Hilde Elshaug, Garcia Llorente Ignacio, Engebretsen Serina Beate Atiya R Ali, Marie Paulsen Madsen, Rasmus Riis Kopperud, Hilde Vollan, Karoline Bragstad, Olav Hungnes                                                                    |
| EPI_ISL_1013617, EPI_ISL_1013620, EPI_ISL_1013649, EPI_ISL_1013655, EPI_ISL_1013656, EPI_ISL_1013657, EPI_ISL_1013658, EPI_ISL_1013659, EPI_ISL_1013660, EPI_ISL_1013661, EPI_ISL_1013662, EPI_ISL_1013663, EPI_ISL_1013664, EPI_ISL_1013665, EPI_ISL_1013666, EPI_ISL_1013667, EPI_ISL_1013668, EPI_ISL_1013669, EPI_ISL_1013670, EPI_ISL_1013671, EPI_ISL_1013672, EPI_ISL_1013673, EPI_ISL_1013674, EPI_ISL_1013675, EPI_ISL_1013676, EPI_ISL_1013677, EPI_ISL_1013680, EPI_ISL_1013681, EPI_ISL_1013682, EPI_ISL_1013683, EPI_ISL_1013684, EPI_ISL_1013685, EPI_ISL_1013687, EPI_ISL_1013689, EPI_ISL_1013691, EPI_ISL_1013694                                                                                                                                                                                                                                                                                                                                                                                                                                                                                                                                                                                                                                                                                                                                                                                                                                                                                                                                                                                                                                                                                                                                                                                                                                                                                                                                                                                                                                                                                                                                                                                                                                                                                                                                                                                                                                                                                                                                                                                                                                                                                                                                                                                                                                                                                                                                                                                                                                                                                                                                                                                                                                                                                                                                                                                                                                                                                                                                                                                                                                                                                                                                                                                                                                                                                                                                                                                                                                                                                                                                                                                                                                                                                                                                                                                                                                                                                                                                                                                                                                                                                                                                                                                                                                                                                                    |                                                                                                                                                                                            |                                                                                          |                                                                                                                                                                                                                                                                                                   |
| see above                                                                                                                                                                                                                                                                                                                                                                                                                                                                                                                                                                                                                                                                                                                                                                                                                                                                                                                                                                                                                                                                                                                                                                                                                                                                                                                                                                                                                                                                                                                                                                                                                                                                                                                                                                                                                                                                                                                                                                                                                                                                                                                                                                                                                                                                                                                                                                                                                                                                                                                                                                                                                                                                                                                                                                                                                                                                                                                                                                                                                                                                                                                                                                                                                                                                                                                                                                                                                                                                                                                                                                                                                                                                                                                                                                                                                                                                                                                                                                                                                                                                                                                                                                                                                                                                                                                                                                                                                                                                                                                                                                                                                                                                                                                                                                                                                                                                                                                             | Dutch COVID-19 response team                                                                                                                                                               | National Institute for Public Health and the Environment (RIVM)                          | Adam Meijer, Harry Vennema, Dirk Eggink, Jeroen Cremer, Sharon van den Brink, Bas van der Veer, AnneMarie van den Brandt, Florian Zwagemaker, Dennis Schmitz, Chantal Reusken, on behalf of the national COVID-19 response team                                                                   |
| EPI_ISL_1013771                                                                                                                                                                                                                                                                                                                                                                                                                                                                                                                                                                                                                                                                                                                                                                                                                                                                                                                                                                                                                                                                                                                                                                                                                                                                                                                                                                                                                                                                                                                                                                                                                                                                                                                                                                                                                                                                                                                                                                                                                                                                                                                                                                                                                                                                                                                                                                                                                                                                                                                                                                                                                                                                                                                                                                                                                                                                                                                                                                                                                                                                                                                                                                                                                                                                                                                                                                                                                                                                                                                                                                                                                                                                                                                                                                                                                                                                                                                                                                                                                                                                                                                                                                                                                                                                                                                                                                                                                                                                                                                                                                                                                                                                                                                                                                                                                                                                                                                       | Imelda Hospital                                                                                                                                                                            | Imelda Hospital                                                                          | Johan Frans, Hanne Valgaeren, Dagmar Obbels                                                                                                                                                                                                                                                       |
| EPI_ISL_1013782, EPI_ISL_1013783, EPI_ISL_1013784, EPI_ISL_1013785, EPI_ISL_1013788, EPI_ISL_1013793, EPI_ISL_1013798, EPI_ISL_1013799, EPI_ISL_1013800, EPI_ISL_1013801, EPI_ISL_1013803, EPI_ISL_1013804, EPI_ISL_1013805, EPI_ISL_1013806, EPI_ISL_1013807, EPI_ISL_1013808, EPI_ISL_1013809, EPI_ISL_1013810, EPI_ISL_1013811, EPI_ISL_1013812, EPI_ISL_1013813, EPI_ISL_1013814, EPI_ISL_1013815, EPI_ISL_1013816, EPI_ISL_1013817, EPI_ISL_1013818, EPI_ISL_1013842, EPI_ISL_1013843, EPI_ISL_1013850, EPI_ISL_1013851, EPI_ISL_1013890, EPI_ISL_1013891, EPI_ISL_1013893, EPI_ISL_1013924, EPI_ISL_1013925, EPI_ISL_1013926, EPI_ISL_1013927, EPI_ISL_1013928, EPI_ISL_1013929, EPI_ISL_1013930, EPI_ISL_1013931, EPI_ISL_1013932, EPI_ISL_1013933, EPI_ISL_1013934, EPI_ISL_1013935, EPI_ISL_1013936, EPI_ISL_1013937, EPI_ISL_1013938, EPI_ISL_1013939, EPI_ISL_1013940, EPI_ISL_1013941, EPI_ISL_1013943, EPI_ISL_1013944, EPI_ISL_1013945, EPI_ISL_1013946, EPI_ISL_1013947, EPI_ISL_1013948, EPI_ISL_1013949, EPI_ISL_1013950, EPI_ISL_1013951, EPI_ISL_1013952, EPI_ISL_1013953, EPI_ISL_1013954, EPI_ISL_1013955, EPI_ISL_1013956, EPI_ISL_1013957, EPI_ISL_1013958, EPI_ISL_1013959, EPI_ISL_1013960, EPI_ISL_1013961, EPI_ISL_1014021, EPI_ISL_1014022, EPI_ISL_1014023, EPI_ISL_1014024, EPI_ISL_1014025, EPI_ISL_1014026, EPI_ISL_1014028, EPI_ISL_1014029, EPI_ISL_1014030, EPI_ISL_1014031, EPI_ISL_1014032, EPI_ISL_1014033, EPI_ISL_1014034, EPI_ISL_1014035, EPI_ISL_1014036, EPI_ISL_1014037, EPI_ISL_1014038, EPI_ISL_1014039, EPI_ISL_1014040, EPI_ISL_1014041, EPI_ISL_1014042, EPI_ISL_1014043, EPI_ISL_1014044, EPI_ISL_1014045, EPI_ISL_1014046, EPI_ISL_1014047, EPI_ISL_1014048, EPI_ISL_1014049, EPI_ISL_1014050, EPI_ISL_1014051, EPI_ISL_1014052, EPI_ISL_1014053, EPI_ISL_1014054, EPI_ISL_1014055, EPI_ISL_1014056, EPI_ISL_1014057, EPI_ISL_1014058, EPI_ISL_1014059, EPI_ISL_1014060, EPI_ISL_1014061, EPI_ISL_1014062, EPI_ISL_1014063, EPI_ISL_1014064, EPI_ISL_1014065, EPI_ISL_1014066, EPI_ISL_1014067, EPI_ISL_1014068, EPI_ISL_1014069, EPI_ISL_1014070, EPI_ISL_1014071, EPI_ISL_1014072, EPI_ISL_1014073, EPI_ISL_1014074, EPI_ISL_1014075, EPI_ISL_1014076, EPI_ISL_1014077, EPI_ISL_1014078, EPI_ISL_1014079, EPI_ISL_1014080, EPI_ISL_1014081, EPI_ISL_1014082, EPI_ISL_1014083, EPI_ISL_1014084, EPI_ISL_1014085, EPI_ISL_1014086, EPI_ISL_1014087, EPI_ISL_1014089, EPI_ISL_1014090, EPI_ISL_1014091, EPI_ISL_1014092, EPI_ISL_1014093, EPI_ISL_1014094, EPI_ISL_1014095, EPI_ISL_1014096, EPI_ISL_1014097, EPI_ISL_1014098, EPI_ISL_1014099, EPI_ISL_1014100, EPI_ISL_1014101, EPI_ISL_1014102, EPI_ISL_1014103, EPI_ISL_1014104, EPI_ISL_1014105, EPI_ISL_1014106, EPI_ISL_1014108, EPI_ISL_1014109, EPI_ISL_1014110, EPI_ISL_1014111, EPI_ISL_1014112, EPI_ISL_1014113, EPI_ISL_1014114, EPI_ISL_1014115, EPI_ISL_1014116, EPI_ISL_1014117, EPI_ISL_1014118, EPI_ISL_1014119, EPI_ISL_1014120, EPI_ISL_1014121, EPI_ISL_1014122, EPI_ISL_1014123, EPI_ISL_1014124, EPI_ISL_1014125, EPI_ISL_1014126, EPI_ISL_1014127, EPI_ISL_1014128, EPI_ISL_1014129, EPI_ISL_1014130, EPI_ISL_1014131, EPI_ISL_1014132, EPI_ISL_1014133, EPI_ISL_1014134, EPI_ISL_1014135, EPI_ISL_1014136, EPI_ISL_1014137, EPI_ISL_1014138, EPI_ISL_1014139, EPI_ISL_1014140, EPI_ISL_1014141, EPI_ISL_1014142, EPI_ISL_1014143, EPI_ISL_1014144, EPI_ISL_1014145, EPI_ISL_1014146, EPI_ISL_1014147, EPI_ISL_1014148, EPI_ISL_1014149, EPI_ISL_1014150, EPI_ISL_1014151, EPI_ISL_1014152, EPI_ISL_1014153, EPI_ISL_1014154, EPI_ISL_1014155, EPI_ISL_1014156, EPI_ISL_1014157, EPI_ISL_1014158, EPI_ISL_1014159, EPI_ISL_1014160, EPI_ISL_1014161, EPI_ISL_1014162, EPI_ISL_1014163, EPI_ISL_1014164, EPI_ISL_1014165, EPI_ISL_1014166, EPI_ISL_1014167, EPI_ISL_1014168, EPI_ISL_1014169, EPI_ISL_1014170, EPI_ISL_1014171, EPI_ISL_1014172, EPI_ISL_1014173, EPI_ISL_1014174, EPI_ISL_1014175, EPI_ISL_1014176, EPI_ISL_1014177, EPI_ISL_1014178, EPI_ISL_1014179, EPI_ISL_1014180, EPI_ISL_1014181, EPI_ISL_1014182, EPI_ISL_1014183, EPI_ISL_1014184, EPI_ISL_1014185, EPI_ISL_1014186, EPI_ISL_1014187, EPI_ISL_1014188, EPI_ISL_1014189, EPI_ISL_1014190, EPI_ISL_1014191, EPI_ISL_1014192, EPI_ISL_1014193, EPI_ISL_1014194, EPI_ISL_1014195, EPI_ISL_1014196, EPI_ISL_1014198, EPI_ISL_1014199, EPI_ISL_1014200, EPI_ISL_1014201, EPI_ISL_1014202, EPI_ISL_1014203, EPI_ISL_1014204, EPI_ISL_1014205, EPI_ISL_1014206, EPI_ISL_1014207, EPI_ISL_1014208, EPI_ISL_1014209, EPI_ISL_1014210, EPI_ISL_1014211, EPI_ISL_1014212, EPI_ISL_1014213, EPI_ISL_1014214, EPI_ISL_1014215, EPI_ISL_1014216, EPI_ISL_1014217, EPI_ISL_1014218, EPI_ISL_1014221, EPI_ISL_1014222, EPI_ISL_1014223, EPI_ISL_1014224, EPI_ISL_1014225, EPI_ISL_1014226, EPI_ISL_1014227, EPI_ISL_1014228, EPI_ISL_1014229, EPI_ISL_1014230, EPI_ISL_1014231, EPI_ISL_1014232, EPI_ISL_1014233, EPI_ISL_1014234, EPI_ISL_1014235 |                                                                                                                                                                                            |                                                                                          |                                                                                                                                                                                                                                                                                                   |
| see above                                                                                                                                                                                                                                                                                                                                                                                                                                                                                                                                                                                                                                                                                                                                                                                                                                                                                                                                                                                                                                                                                                                                                                                                                                                                                                                                                                                                                                                                                                                                                                                                                                                                                                                                                                                                                                                                                                                                                                                                                                                                                                                                                                                                                                                                                                                                                                                                                                                                                                                                                                                                                                                                                                                                                                                                                                                                                                                                                                                                                                                                                                                                                                                                                                                                                                                                                                                                                                                                                                                                                                                                                                                                                                                                                                                                                                                                                                                                                                                                                                                                                                                                                                                                                                                                                                                                                                                                                                                                                                                                                                                                                                                                                                                                                                                                                                                                                                                             | Dutch COVID-19 response team                                                                                                                                                               | National Institute for Public Health and the Environment (RIVM)                          | Adam Meijer, Harry Vennema, Dirk Eggink, Jeroen Cremer, Sharon van den Brink, Bas van der Veer, AnneMarie van den Brandt, Florian Zwagemaker, Dennis Schmitz, Chantal Reusken, on behalf of the national COVID-19 response team                                                                   |
| EPI_ISL_1014237                                                                                                                                                                                                                                                                                                                                                                                                                                                                                                                                                                                                                                                                                                                                                                                                                                                                                                                                                                                                                                                                                                                                                                                                                                                                                                                                                                                                                                                                                                                                                                                                                                                                                                                                                                                                                                                                                                                                                                                                                                                                                                                                                                                                                                                                                                                                                                                                                                                                                                                                                                                                                                                                                                                                                                                                                                                                                                                                                                                                                                                                                                                                                                                                                                                                                                                                                                                                                                                                                                                                                                                                                                                                                                                                                                                                                                                                                                                                                                                                                                                                                                                                                                                                                                                                                                                                                                                                                                                                                                                                                                                                                                                                                                                                                                                                                                                                                                                       | University of Bari Biomedical Sciences and Human Oncology                                                                                                                                  | University of Bari Biomedical Sciences and Human Oncology                                | Chironna M., Sallustio A., Loconsole D., Accogli M.                                                                                                                                                                                                                                               |
| EPI_ISL_1014270, EPI_ISL_1014271, EPI_ISL_1014278, EPI_ISL_1014283, EPI_ISL_1014351, EPI_ISL_1014352, EPI_ISL_1014353, EPI_ISL_1014354, EPI_ISL_1014355, EPI_ISL_1014383, EPI_ISL_1014416, EPI_ISL_1014597, EPI_ISL_1014598, EPI_ISL_1014599, EPI_ISL_1014600, EPI_ISL_1014601, EPI_ISL_1014602,                                                                                                                                                                                                                                                                                                                                                                                                                                                                                                                                                                                                                                                                                                                                                                                                                                                                                                                                                                                                                                                                                                                                                                                                                                                                                                                                                                                                                                                                                                                                                                                                                                                                                                                                                                                                                                                                                                                                                                                                                                                                                                                                                                                                                                                                                                                                                                                                                                                                                                                                                                                                                                                                                                                                                                                                                                                                                                                                                                                                                                                                                                                                                                                                                                                                                                                                                                                                                                                                                                                                                                                                                                                                                                                                                                                                                                                                                                                                                                                                                                                                                                                                                                                                                                                                                                                                                                                                                                                                                                                                                                                                                                      |                                                                                                                                                                                            |                                                                                          |                                                                                                                                                                                                                                                                                                   |



|                                                                                                                                                                                                                                                                                                                                                                                                                                                                                                                                                                                                                                                                                                                                                                                                              |                                                                                                         |                                                                                                         |                                                                                                                                                                                                                                                                                                                                                                                                                                                                                                                                                                                                          |
|--------------------------------------------------------------------------------------------------------------------------------------------------------------------------------------------------------------------------------------------------------------------------------------------------------------------------------------------------------------------------------------------------------------------------------------------------------------------------------------------------------------------------------------------------------------------------------------------------------------------------------------------------------------------------------------------------------------------------------------------------------------------------------------------------------------|---------------------------------------------------------------------------------------------------------|---------------------------------------------------------------------------------------------------------|----------------------------------------------------------------------------------------------------------------------------------------------------------------------------------------------------------------------------------------------------------------------------------------------------------------------------------------------------------------------------------------------------------------------------------------------------------------------------------------------------------------------------------------------------------------------------------------------------------|
| EPI_ISL_1014603, EPI_ISL_1014604, EPI_ISL_1014605, EPI_ISL_1014606, EPI_ISL_1014607, EPI_ISL_1014608, EPI_ISL_1014609, EPI_ISL_1014610, EPI_ISL_1014611                                                                                                                                                                                                                                                                                                                                                                                                                                                                                                                                                                                                                                                      |                                                                                                         |                                                                                                         |                                                                                                                                                                                                                                                                                                                                                                                                                                                                                                                                                                                                          |
| see above                                                                                                                                                                                                                                                                                                                                                                                                                                                                                                                                                                                                                                                                                                                                                                                                    | Dutch COVID-19 response team                                                                            | National Institute for Public Health and the Environment (RIVM)                                         | Adam Meijer, Harry Vennema, Dirk Eggink, Jeroen Cremer, Sharon van den Brink, Bas van der Veer, AnneMarie van den Brandt, Florian Zwagemaker, Dennis Schmitz, Chantal Reusken, on behalf of the national COVID-19 response team                                                                                                                                                                                                                                                                                                                                                                          |
| EPI_ISL_1014690                                                                                                                                                                                                                                                                                                                                                                                                                                                                                                                                                                                                                                                                                                                                                                                              | University of Bari Biomedical Sciences and Human Oncology                                               | University of Bari Biomedical Sciences and Human Oncology                                               | Chironna M., Sallustio A., Loconsole D., Accogli M.                                                                                                                                                                                                                                                                                                                                                                                                                                                                                                                                                      |
| EPI_ISL_1014693, EPI_ISL_1014694, EPI_ISL_1014695, EPI_ISL_1014697, EPI_ISL_1014702                                                                                                                                                                                                                                                                                                                                                                                                                                                                                                                                                                                                                                                                                                                          | University Hospital Basel, Clinical Virology                                                            | University Hospital Basel, Clinical Bacteriology                                                        | Tim Roloff, Madlen Stange, Helena MB Seth-Smith, Alfredo Mari, Karoline Leuzinger, Julia Bielicki, Manuel Battegay, Hans Hirsch, Adrian Egli                                                                                                                                                                                                                                                                                                                                                                                                                                                             |
| EPI_ISL_1014806, EPI_ISL_1014808, EPI_ISL_1014809, EPI_ISL_1014852, EPI_ISL_1014859, EPI_ISL_1014860, EPI_ISL_1014861, EPI_ISL_1014862, EPI_ISL_1014863, EPI_ISL_1014864, EPI_ISL_1014865, EPI_ISL_1014866, EPI_ISL_1014867, EPI_ISL_1014868, EPI_ISL_1014870, EPI_ISL_1014871, EPI_ISL_1014872, EPI_ISL_1014873, EPI_ISL_1014874, EPI_ISL_1014875, EPI_ISL_1014876, EPI_ISL_1014877                                                                                                                                                                                                                                                                                                                                                                                                                         |                                                                                                         |                                                                                                         |                                                                                                                                                                                                                                                                                                                                                                                                                                                                                                                                                                                                          |
| see above                                                                                                                                                                                                                                                                                                                                                                                                                                                                                                                                                                                                                                                                                                                                                                                                    | University of Michigan Clinical Microbiology Laboratory                                                 | Lauring Lab, University of Michigan, Department of Microbiology and Immunology                          | Valesano                                                                                                                                                                                                                                                                                                                                                                                                                                                                                                                                                                                                 |
| EPI_ISL_1014906, EPI_ISL_1014913, EPI_ISL_1014916, EPI_ISL_1014918, EPI_ISL_1014919, EPI_ISL_1014920, EPI_ISL_1014927, EPI_ISL_1014932, EPI_ISL_1014935                                                                                                                                                                                                                                                                                                                                                                                                                                                                                                                                                                                                                                                      | Jessa                                                                                                   | Jessa                                                                                                   | Jessa_cmdLab                                                                                                                                                                                                                                                                                                                                                                                                                                                                                                                                                                                             |
| EPI_ISL_1014940                                                                                                                                                                                                                                                                                                                                                                                                                                                                                                                                                                                                                                                                                                                                                                                              | Algemeen Klinisch Labo Lier                                                                             | KU Leuven, Rega Institute, Clinical and Epidemiological Virology                                        | Tony Wawina-Bokalanga, Bert Vanmechelen, Joan Marti-Carerras, Piet Maes                                                                                                                                                                                                                                                                                                                                                                                                                                                                                                                                  |
| EPI_ISL_1015361                                                                                                                                                                                                                                                                                                                                                                                                                                                                                                                                                                                                                                                                                                                                                                                              | Coast Diagnostics                                                                                       | Synergy Laboratories                                                                                    | Megan Cornwell                                                                                                                                                                                                                                                                                                                                                                                                                                                                                                                                                                                           |
| EPI_ISL_1015378                                                                                                                                                                                                                                                                                                                                                                                                                                                                                                                                                                                                                                                                                                                                                                                              | Biology Lab, HIA PERCY                                                                                  | IRBA, 2MI                                                                                               | GORGE O., NOLENT F., SARILAR V., FOISSAUD V.                                                                                                                                                                                                                                                                                                                                                                                                                                                                                                                                                             |
| EPI_ISL_1015535, EPI_ISL_1015537, EPI_ISL_1015542, EPI_ISL_1015548, EPI_ISL_1015560                                                                                                                                                                                                                                                                                                                                                                                                                                                                                                                                                                                                                                                                                                                          | Azienda Sanitaria dell'Alto Adige Laboratorio Aziendale di Microbiologia e Virologia                    | Istituto di Genomica Applicata                                                                          | Elisabetta Pagani, Irene Bianconi, Elisabetta Giacobazzi, Elisa Masi, Stefanie Wieser, Irena Jurman, Vera Vendramin, Gabriele Magris, Eleonora Paparelli, Davide Scaglione, Michele Morgante                                                                                                                                                                                                                                                                                                                                                                                                             |
| EPI_ISL_1015575, EPI_ISL_1015578, EPI_ISL_1015579, EPI_ISL_1015580, EPI_ISL_1015581, EPI_ISL_1015583, EPI_ISL_1015584, EPI_ISL_1015585, EPI_ISL_1015586, EPI_ISL_1015588, EPI_ISL_1015589, EPI_ISL_1015590, EPI_ISL_1015591, EPI_ISL_1015592, EPI_ISL_1015593, EPI_ISL_1015607, EPI_ISL_1015608, EPI_ISL_1015609, EPI_ISL_1015610, EPI_ISL_1015612, EPI_ISL_1015613, EPI_ISL_1015614, EPI_ISL_1015615, EPI_ISL_1015617, EPI_ISL_1015620, EPI_ISL_1015621, EPI_ISL_1015622, EPI_ISL_1015623, EPI_ISL_1015624, EPI_ISL_1015628, EPI_ISL_1015629, EPI_ISL_1015631, EPI_ISL_1015632, EPI_ISL_1015633, EPI_ISL_1015634, EPI_ISL_1015635, EPI_ISL_1015636, EPI_ISL_1015637, EPI_ISL_1015638, EPI_ISL_1015639, EPI_ISL_1015640, EPI_ISL_1015641, EPI_ISL_1015642, EPI_ISL_1015643, EPI_ISL_1015646, EPI_ISL_1015647 |                                                                                                         |                                                                                                         |                                                                                                                                                                                                                                                                                                                                                                                                                                                                                                                                                                                                          |
| see above                                                                                                                                                                                                                                                                                                                                                                                                                                                                                                                                                                                                                                                                                                                                                                                                    | Maryland Public Health Laboratory                                                                       | Maryland Public Health Laboratory                                                                       | Maryland Department of Health Laboratories Administration                                                                                                                                                                                                                                                                                                                                                                                                                                                                                                                                                |
| EPI_ISL_1016103, EPI_ISL_1016104, EPI_ISL_1016107, EPI_ISL_1016108, EPI_ISL_1016118, EPI_ISL_1016125                                                                                                                                                                                                                                                                                                                                                                                                                                                                                                                                                                                                                                                                                                         | URMC LABS                                                                                               | Wadsworth Center, New York State Department of Health                                                   | Kirsten St. George, Daryl M. Lamson, Alexis Russel, Matthew Shudt, Melissa A Leisner, Jonathan Plitnick, Navjot Singh, John Kelly, Erasmus Schneider, Erica Lasek-Nesselquist                                                                                                                                                                                                                                                                                                                                                                                                                            |
| EPI_ISL_1016133                                                                                                                                                                                                                                                                                                                                                                                                                                                                                                                                                                                                                                                                                                                                                                                              | THE MARY IMOGENE BASSETT HOSPITAL                                                                       | Wadsworth Center, New York State Department of Health                                                   | Kirsten St. George, Daryl M. Lamson, Alexis Russel, Matthew Shudt, Melissa A Leisner, Jonathan Plitnick, Navjot Singh, John Kelly, Erasmus Schneider, Erica Lasek-Nesselquist                                                                                                                                                                                                                                                                                                                                                                                                                            |
| EPI_ISL_1016169                                                                                                                                                                                                                                                                                                                                                                                                                                                                                                                                                                                                                                                                                                                                                                                              | TEMPUS LABS INC                                                                                         | Wadsworth Center, New York State Department of Health                                                   | Kirsten St. George, Daryl M. Lamson, Alexis Russel, Matthew Shudt, Melissa A Leisner, Jonathan Plitnick, Navjot Singh, John Kelly, Erasmus Schneider, Erica Lasek-Nesselquist                                                                                                                                                                                                                                                                                                                                                                                                                            |
| EPI_ISL_1016178, EPI_ISL_1016185                                                                                                                                                                                                                                                                                                                                                                                                                                                                                                                                                                                                                                                                                                                                                                             | MONTEFIORE MEDICAL CENTER LABORATORIES                                                                  | Wadsworth Center, New York State Department of Health                                                   | Kirsten St. George, Daryl M. Lamson, Alexis Russel, Matthew Shudt, Melissa A Leisner, Jonathan Plitnick, Navjot Singh, John Kelly, Erasmus Schneider, Erica Lasek-Nesselquist                                                                                                                                                                                                                                                                                                                                                                                                                            |
| EPI_ISL_1016246, EPI_ISL_1016248                                                                                                                                                                                                                                                                                                                                                                                                                                                                                                                                                                                                                                                                                                                                                                             | New York Presbyterian Hospital                                                                          | Wadsworth Center, New York State Department of Health                                                   | Kirsten St. George, Daryl M. Lamson, Alexis Russel, Matthew Shudt, Melissa A Leisner, Jonathan Plitnick, Navjot Singh, John Kelly, Erasmus Schneider, Erica Lasek-Nesselquist                                                                                                                                                                                                                                                                                                                                                                                                                            |
| EPI_ISL_1016608                                                                                                                                                                                                                                                                                                                                                                                                                                                                                                                                                                                                                                                                                                                                                                                              | Helix/Illumina                                                                                          | Respiratory Viruses Branch, Division of Viral Diseases, Centers for Disease Control and Prevention      | Peter W. Cook, Dakota Howard, Dhvani Batra, Ben L. Rambo-Martin, Eileen de Feo, Jan Antico, Christine Tran, Matthew Tolentino, Shannon Wickline, Kim Gietzen, Brad Sickler, Jingtao Liu, Eric Allen, Phil Febbo, Summer Galloway, Nicole L. Washington, Simon White, Geraint Levan, Kelly Schiabor Barrett, Elizabeth Cirulli, Alexandre Bolze, Ary Ascencio, Charlotte Rivera-Garcia, Ryan Cho, Jason Nguyen, Sherry Wang, Jimmy Ramirez, Tyler Cassens, Efrén Sandoval, Magnus Isaksson, William Lee, David Becker, Marc Laurent, James Lu, Clinton R. Paden, Suxiang Tong, Duncan MacCannell          |
| EPI_ISL_1016855                                                                                                                                                                                                                                                                                                                                                                                                                                                                                                                                                                                                                                                                                                                                                                                              | Middlemore Hospital                                                                                     | Institute of Environmental Science and Research (ESR)                                                   | Xiaoyun Ren, Matt Storey, Nikki Freed, Muhammad Faisal, Jing Wang, Hermes Perez, Anja Werno, Antje van der Linden, Arlo Upton, Chris Mansell, David Hammer, Dragana Drinkovic, Gary McAuliffe, Hana Sofia Andersson, James Ussher, Jill Sherwood, Josh Freeman, Julia Howard, Juliet Elvy, Mary DeAlmeida, Matt Blakiston, Matthew Rogers, Max Bloomfield, Michael Addidle, Michelle Balm, Sally Roberts, Sarah Jefferies, Sharmini Muttaiyah, Susan Morpeth, Susan Taylor, Timothy Blackmore, Vani Sathyendran, Veronica Playle, Virginia Hope, Erasmus Smit, Lauren Jelly, Olin Silander, Joep de Ligt |
| EPI_ISL_1016856                                                                                                                                                                                                                                                                                                                                                                                                                                                                                                                                                                                                                                                                                                                                                                                              | LabTests                                                                                                | Institute of Environmental Science and Research (ESR)                                                   | Xiaoyun Ren, Matt Storey, Nikki Freed, Muhammad Faisal, Jing Wang, Hermes Perez, Anja Werno, Antje van der Linden, Arlo Upton, Chris Mansell, David Hammer, Dragana Drinkovic, Gary McAuliffe, Hana Sofia Andersson, James Ussher, Jill Sherwood, Josh Freeman, Julia Howard, Juliet Elvy, Mary DeAlmeida, Matt Blakiston, Matthew Rogers, Max Bloomfield, Michael Addidle, Michelle Balm, Sally Roberts, Sarah Jefferies, Sharmini Muttaiyah, Susan Morpeth, Susan Taylor, Timothy Blackmore, Vani Sathyendran, Veronica Playle, Virginia Hope, Erasmus Smit, Lauren Jelly, Olin Silander, Joep de Ligt |
| EPI_ISL_1016857                                                                                                                                                                                                                                                                                                                                                                                                                                                                                                                                                                                                                                                                                                                                                                                              | Middlemore Hospital                                                                                     | Institute of Environmental Science and Research (ESR)                                                   | Xiaoyun Ren, Matt Storey, Nikki Freed, Muhammad Faisal, Jing Wang, Hermes Perez, Anja Werno, Antje van der Linden, Arlo Upton, Chris Mansell, David Hammer, Dragana Drinkovic, Gary McAuliffe, Hana Sofia Andersson, James Ussher, Jill Sherwood, Josh Freeman, Julia Howard, Juliet Elvy, Mary DeAlmeida, Matt Blakiston, Matthew Rogers, Max Bloomfield, Michael Addidle, Michelle Balm, Sally Roberts, Sarah Jefferies, Sharmini Muttaiyah, Susan Morpeth, Susan Taylor, Timothy Blackmore, Vani Sathyendran, Veronica Playle, Virginia Hope, Erasmus Smit, Lauren Jelly, Olin Silander, Joep de Ligt |
| EPI_ISL_1016858, EPI_ISL_1016859, EPI_ISL_1016864, EPI_ISL_1016873                                                                                                                                                                                                                                                                                                                                                                                                                                                                                                                                                                                                                                                                                                                                           | LabPLUS                                                                                                 | Institute of Environmental Science and Research (ESR)                                                   | Xiaoyun Ren, Matt Storey, Nikki Freed, Muhammad Faisal, Jing Wang, Hermes Perez, Anja Werno, Antje van der Linden, Arlo Upton, Chris Mansell, David Hammer, Dragana Drinkovic, Gary McAuliffe, Hana Sofia Andersson, James Ussher, Jill Sherwood, Josh Freeman, Julia Howard, Juliet Elvy, Mary DeAlmeida, Matt Blakiston, Matthew Rogers, Max Bloomfield, Michael Addidle, Michelle Balm, Sally Roberts, Sarah Jefferies, Sharmini Muttaiyah, Susan Morpeth, Susan Taylor, Timothy Blackmore, Vani Sathyendran, Veronica Playle, Virginia Hope, Erasmus Smit, Lauren Jelly, Olin Silander, Joep de Ligt |
| EPI_ISL_1016884                                                                                                                                                                                                                                                                                                                                                                                                                                                                                                                                                                                                                                                                                                                                                                                              | University of Sarajevo, Veterinary Faculty, Laboratory for Molecular Diagnostic and Research Laboratory | University of Sarajevo, Veterinary Faculty, Laboratory for Molecular Diagnostic and Research Laboratory | Goletic T., Goletic S., Softic A., Alic-Seho A., Nicevic M., Sabic E., Terzic I., Jazic A., Hodzic A.                                                                                                                                                                                                                                                                                                                                                                                                                                                                                                    |
| EPI_ISL_1016885                                                                                                                                                                                                                                                                                                                                                                                                                                                                                                                                                                                                                                                                                                                                                                                              | University of Sarajevo, Veterinary Faculty, Laboratory for Molecular Diagnostic and Research Laboratory | University of Sarajevo, Veterinary Faculty, Laboratory for Molecular Diagnostic and Research Laboratory | Goletic S., Goletic T., Softic A., Alic-Seho A., Terzic I., Jazic A., Nicevic M., Hodzic A., Sabic E.                                                                                                                                                                                                                                                                                                                                                                                                                                                                                                    |
| EPI_ISL_1016968                                                                                                                                                                                                                                                                                                                                                                                                                                                                                                                                                                                                                                                                                                                                                                                              | University of Sarajevo, Veterinary Faculty, Laboratory for Molecular Diagnostic and Research Laboratory | University of Sarajevo, Veterinary Faculty, Laboratory for Molecular Diagnostic and Research Laboratory | Goletic S., Goletic T., Softic A., Alic-Seho A., Hodzic A., Terzic I., Sabic E., Jazic A., Nicevic M.                                                                                                                                                                                                                                                                                                                                                                                                                                                                                                    |
| EPI_ISL_1016969                                                                                                                                                                                                                                                                                                                                                                                                                                                                                                                                                                                                                                                                                                                                                                                              | University of Sarajevo, Veterinary Faculty, Laboratory for Molecular Diagnostic and Research Laboratory | University of Sarajevo, Veterinary Faculty, Laboratory for Molecular Diagnostic and Research Laboratory | Goletic S., Goletic T., Softic A., Alic-Seho A., Nicevic M., Terzic I., Jazic A., Hodzic A., Sabic E.                                                                                                                                                                                                                                                                                                                                                                                                                                                                                                    |
| EPI_ISL_1017849, EPI_ISL_1017857, EPI_ISL_1017862, EPI_ISL_1017923, EPI_ISL_1017924, EPI_ISL_1017926, EPI_ISL_1017928, EPI_ISL_1017932, EPI_ISL_1017933, EPI_ISL_1017936, EPI_ISL_1017937, EPI_ISL_1017938, EPI_ISL_1017939, EPI_ISL_1017941, EPI_ISL_1017942, EPI_ISL_1017944, EPI_ISL_1017945, EPI_ISL_1017946, EPI_ISL_1017950, EPI_ISL_1017953, EPI_ISL_1017954, EPI_ISL_1017956, EPI_ISL_1017957, EPI_ISL_1017960, EPI_ISL_1017962, EPI_ISL_1017966, EPI_ISL_1017967                                                                                                                                                                                                                                                                                                                                    |                                                                                                         |                                                                                                         |                                                                                                                                                                                                                                                                                                                                                                                                                                                                                                                                                                                                          |
| see above                                                                                                                                                                                                                                                                                                                                                                                                                                                                                                                                                                                                                                                                                                                                                                                                    | Wyoming Public Health Laboratory                                                                        | Wyoming Public Health Laboratory                                                                        | Noah Hull, Taylor Fearing, Lynette Gumbleton, Channing Weber, Ashley Norberg, Bailey Bowcutt, and Wanda Manley                                                                                                                                                                                                                                                                                                                                                                                                                                                                                           |
| EPI_ISL_1017969, EPI_ISL_1017970                                                                                                                                                                                                                                                                                                                                                                                                                                                                                                                                                                                                                                                                                                                                                                             | DOHMH PHL                                                                                               | New York City Public Health Laboratory                                                                  | Jade Wang, et al.                                                                                                                                                                                                                                                                                                                                                                                                                                                                                                                                                                                        |
| EPI_ISL_1017980                                                                                                                                                                                                                                                                                                                                                                                                                                                                                                                                                                                                                                                                                                                                                                                              | DOHMH Morrisania                                                                                        | New York City Public Health Laboratory                                                                  | Jade Wang, et al.                                                                                                                                                                                                                                                                                                                                                                                                                                                                                                                                                                                        |
| EPI_ISL_1017982                                                                                                                                                                                                                                                                                                                                                                                                                                                                                                                                                                                                                                                                                                                                                                                              | DOHMH Central Harlem                                                                                    | New York City Public Health Laboratory                                                                  | Jade Wang, et al.                                                                                                                                                                                                                                                                                                                                                                                                                                                                                                                                                                                        |







[illegible]

|                                                                                                                                                                                                                                                                                                                                                                                                                                                                                                                                                                                                                                                                                                                                                                                                                                                                                                                                                                                                                                                                                                                                                                                                                                                                                                                                                                                                                                                                                                                                                                                                                                                                                                                                                                                                                                                                                                                                                                                                                                                                                                                                                                                                                                                                                                                                                                                                                                                                                                                                                                                                                                                                                                                                                                                                                                                                                                    |                                                                            |                                                                            |                                                                                                                                                                                                                                                                                                                    |
|----------------------------------------------------------------------------------------------------------------------------------------------------------------------------------------------------------------------------------------------------------------------------------------------------------------------------------------------------------------------------------------------------------------------------------------------------------------------------------------------------------------------------------------------------------------------------------------------------------------------------------------------------------------------------------------------------------------------------------------------------------------------------------------------------------------------------------------------------------------------------------------------------------------------------------------------------------------------------------------------------------------------------------------------------------------------------------------------------------------------------------------------------------------------------------------------------------------------------------------------------------------------------------------------------------------------------------------------------------------------------------------------------------------------------------------------------------------------------------------------------------------------------------------------------------------------------------------------------------------------------------------------------------------------------------------------------------------------------------------------------------------------------------------------------------------------------------------------------------------------------------------------------------------------------------------------------------------------------------------------------------------------------------------------------------------------------------------------------------------------------------------------------------------------------------------------------------------------------------------------------------------------------------------------------------------------------------------------------------------------------------------------------------------------------------------------------------------------------------------------------------------------------------------------------------------------------------------------------------------------------------------------------------------------------------------------------------------------------------------------------------------------------------------------------------------------------------------------------------------------------------------------------|----------------------------------------------------------------------------|----------------------------------------------------------------------------|--------------------------------------------------------------------------------------------------------------------------------------------------------------------------------------------------------------------------------------------------------------------------------------------------------------------|
|                                                                                                                                                                                                                                                                                                                                                                                                                                                                                                                                                                                                                                                                                                                                                                                                                                                                                                                                                                                                                                                                                                                                                                                                                                                                                                                                                                                                                                                                                                                                                                                                                                                                                                                                                                                                                                                                                                                                                                                                                                                                                                                                                                                                                                                                                                                                                                                                                                                                                                                                                                                                                                                                                                                                                                                                                                                                                                    |                                                                            | (COG-UK) Consortium                                                        | Dominic Kwiatkowski, Cordelia Langford, John Sillitoe on behalf of the Wellcome Sanger Institute COVID-19 Surveillance Team                                                                                                                                                                                        |
| EPI_ISL_1033889                                                                                                                                                                                                                                                                                                                                                                                                                                                                                                                                                                                                                                                                                                                                                                                                                                                                                                                                                                                                                                                                                                                                                                                                                                                                                                                                                                                                                                                                                                                                                                                                                                                                                                                                                                                                                                                                                                                                                                                                                                                                                                                                                                                                                                                                                                                                                                                                                                                                                                                                                                                                                                                                                                                                                                                                                                                                                    | Lighthouse Lab in Cambridge                                                | Wellcome Sanger Institute for the COVID-19 Genomics UK (COG-UK) Consortium | Rob Howes, The Lighthouse Lab in Cambridge and Alex Alderton, Roberto Amato, Jeffrey Barrett, Sonia Goncalves, Ewan Harrison, David K. Jackson, Ian Johnston, Dominic Kwiatkowski, Cordelia Langford, John Sillitoe on behalf of the Wellcome Sanger Institute COVID-19 Surveillance Team                          |
| EPI_ISL_1033890, EPI_ISL_1033891, EPI_ISL_1033892                                                                                                                                                                                                                                                                                                                                                                                                                                                                                                                                                                                                                                                                                                                                                                                                                                                                                                                                                                                                                                                                                                                                                                                                                                                                                                                                                                                                                                                                                                                                                                                                                                                                                                                                                                                                                                                                                                                                                                                                                                                                                                                                                                                                                                                                                                                                                                                                                                                                                                                                                                                                                                                                                                                                                                                                                                                  | Lighthouse Lab in Milton Keynes                                            | Wellcome Sanger Institute for the COVID-19 Genomics UK (COG-UK) Consortium | The Lighthouse Lab in Milton Keynes and Alex Alderton, Roberto Amato, Jeffrey Barrett, Sonia Goncalves, Ewan Harrison, David K. Jackson, Ian Johnston, Dominic Kwiatkowski, Cordelia Langford, John Sillitoe on behalf of the Wellcome Sanger Institute COVID-19 Surveillance Team                                 |
| EPI_ISL_1033893                                                                                                                                                                                                                                                                                                                                                                                                                                                                                                                                                                                                                                                                                                                                                                                                                                                                                                                                                                                                                                                                                                                                                                                                                                                                                                                                                                                                                                                                                                                                                                                                                                                                                                                                                                                                                                                                                                                                                                                                                                                                                                                                                                                                                                                                                                                                                                                                                                                                                                                                                                                                                                                                                                                                                                                                                                                                                    | Lighthouse Lab in Cambridge                                                | Wellcome Sanger Institute for the COVID-19 Genomics UK (COG-UK) Consortium | Rob Howes, The Lighthouse Lab in Cambridge and Alex Alderton, Roberto Amato, Jeffrey Barrett, Sonia Goncalves, Ewan Harrison, David K. Jackson, Ian Johnston, Dominic Kwiatkowski, Cordelia Langford, John Sillitoe on behalf of the Wellcome Sanger Institute COVID-19 Surveillance Team                          |
| EPI_ISL_1033896, EPI_ISL_1033897, EPI_ISL_1033899, EPI_ISL_1033900, EPI_ISL_1033901, EPI_ISL_1033902, EPI_ISL_1033905, EPI_ISL_1033906, EPI_ISL_1033908                                                                                                                                                                                                                                                                                                                                                                                                                                                                                                                                                                                                                                                                                                                                                                                                                                                                                                                                                                                                                                                                                                                                                                                                                                                                                                                                                                                                                                                                                                                                                                                                                                                                                                                                                                                                                                                                                                                                                                                                                                                                                                                                                                                                                                                                                                                                                                                                                                                                                                                                                                                                                                                                                                                                            | Lighthouse Lab in Milton Keynes                                            | Wellcome Sanger Institute for the COVID-19 Genomics UK (COG-UK) Consortium | The Lighthouse Lab in Milton Keynes and Alex Alderton, Roberto Amato, Jeffrey Barrett, Sonia Goncalves, Ewan Harrison, David K. Jackson, Ian Johnston, Dominic Kwiatkowski, Cordelia Langford, John Sillitoe on behalf of the Wellcome Sanger Institute COVID-19 Surveillance Team                                 |
| EPI_ISL_1033909                                                                                                                                                                                                                                                                                                                                                                                                                                                                                                                                                                                                                                                                                                                                                                                                                                                                                                                                                                                                                                                                                                                                                                                                                                                                                                                                                                                                                                                                                                                                                                                                                                                                                                                                                                                                                                                                                                                                                                                                                                                                                                                                                                                                                                                                                                                                                                                                                                                                                                                                                                                                                                                                                                                                                                                                                                                                                    | Lighthouse Lab in Cambridge                                                | Wellcome Sanger Institute for the COVID-19 Genomics UK (COG-UK) Consortium | Rob Howes, The Lighthouse Lab in Cambridge and Alex Alderton, Roberto Amato, Jeffrey Barrett, Sonia Goncalves, Ewan Harrison, David K. Jackson, Ian Johnston, Dominic Kwiatkowski, Cordelia Langford, John Sillitoe on behalf of the Wellcome Sanger Institute COVID-19 Surveillance Team                          |
| EPI_ISL_1033910, EPI_ISL_1033912, EPI_ISL_1033913, EPI_ISL_1033914, EPI_ISL_1033917, EPI_ISL_1033919, EPI_ISL_1033921, EPI_ISL_1033923, EPI_ISL_1033924, EPI_ISL_1033926, EPI_ISL_1033927, EPI_ISL_1033929, EPI_ISL_1033930, EPI_ISL_1033931, EPI_ISL_1033932, EPI_ISL_1033934, EPI_ISL_1033935, EPI_ISL_1033936, EPI_ISL_1033937, EPI_ISL_1033940, EPI_ISL_1033942, EPI_ISL_1033943, EPI_ISL_1033944, EPI_ISL_1033945, EPI_ISL_1033946, EPI_ISL_1033947, EPI_ISL_1033948, EPI_ISL_1033949, EPI_ISL_1033951, EPI_ISL_1033952, EPI_ISL_1033953, EPI_ISL_1033954, EPI_ISL_1033955, EPI_ISL_1033956, EPI_ISL_1033957, EPI_ISL_1033958, EPI_ISL_1033960, EPI_ISL_1033961, EPI_ISL_1033962, EPI_ISL_1033963, EPI_ISL_1033964, EPI_ISL_1033965, EPI_ISL_1033967, EPI_ISL_1033968, EPI_ISL_1033969, EPI_ISL_1033970, EPI_ISL_1033971, EPI_ISL_1033972, EPI_ISL_1033974, EPI_ISL_1033975, EPI_ISL_1033976, EPI_ISL_1033979, EPI_ISL_1033980, EPI_ISL_1033981, EPI_ISL_1033982, EPI_ISL_1033983, EPI_ISL_1033984, EPI_ISL_1033985, EPI_ISL_1033987, EPI_ISL_1033988, EPI_ISL_1033990, EPI_ISL_1033991, EPI_ISL_1033992, EPI_ISL_1033995, EPI_ISL_1033996, EPI_ISL_1033999, EPI_ISL_1034000, EPI_ISL_1034001, EPI_ISL_1034005, EPI_ISL_1034008, EPI_ISL_1034009, EPI_ISL_1034010, EPI_ISL_1034011, EPI_ISL_1034012, EPI_ISL_1034014, EPI_ISL_1034015, EPI_ISL_1034016, EPI_ISL_1034017, EPI_ISL_1034018, EPI_ISL_1034019, EPI_ISL_1034020, EPI_ISL_1034021, EPI_ISL_1034023, EPI_ISL_1034024, EPI_ISL_1034025, EPI_ISL_1034028, EPI_ISL_1034031, EPI_ISL_1034032, EPI_ISL_1034033, EPI_ISL_1034034, EPI_ISL_1034035, EPI_ISL_1034036, EPI_ISL_1034037, EPI_ISL_1034039, EPI_ISL_1034040, EPI_ISL_1034044, EPI_ISL_1034046, EPI_ISL_1034047, EPI_ISL_1034049, EPI_ISL_1034051, EPI_ISL_1034053, EPI_ISL_1034054, EPI_ISL_1034055, EPI_ISL_1034057, EPI_ISL_1034058, EPI_ISL_1034059, EPI_ISL_1034060, EPI_ISL_1034061, EPI_ISL_1034062, EPI_ISL_1034063, EPI_ISL_1034064, EPI_ISL_1034065, EPI_ISL_1034066, EPI_ISL_1034067, EPI_ISL_1034068, EPI_ISL_1034069, EPI_ISL_1034072, EPI_ISL_1034073, EPI_ISL_1034074, EPI_ISL_1034078, EPI_ISL_1034079, EPI_ISL_1034082, EPI_ISL_1034084, EPI_ISL_1034085, EPI_ISL_1034086, EPI_ISL_1034088, EPI_ISL_1034090, EPI_ISL_1034091, EPI_ISL_1034092, EPI_ISL_1034093, EPI_ISL_1034094, EPI_ISL_1034095, EPI_ISL_1034096, EPI_ISL_1034097, EPI_ISL_1034098, EPI_ISL_1034100, EPI_ISL_1034101, EPI_ISL_1034102, EPI_ISL_1034103, EPI_ISL_1034104, EPI_ISL_1034107, EPI_ISL_1034108, EPI_ISL_1034109, EPI_ISL_1034110, EPI_ISL_1034111, EPI_ISL_1034112, EPI_ISL_1034115, EPI_ISL_1034117, EPI_ISL_1034118, EPI_ISL_1034119, EPI_ISL_1034121, EPI_ISL_1034122, EPI_ISL_1034124, EPI_ISL_1034125, EPI_ISL_1034126, EPI_ISL_1034127, EPI_ISL_1034128, EPI_ISL_1034129, EPI_ISL_1034130, EPI_ISL_1034131, EPI_ISL_1034133, EPI_ISL_1034134, EPI_ISL_1034136, EPI_ISL_1034137 |                                                                            |                                                                            |                                                                                                                                                                                                                                                                                                                    |
| see above                                                                                                                                                                                                                                                                                                                                                                                                                                                                                                                                                                                                                                                                                                                                                                                                                                                                                                                                                                                                                                                                                                                                                                                                                                                                                                                                                                                                                                                                                                                                                                                                                                                                                                                                                                                                                                                                                                                                                                                                                                                                                                                                                                                                                                                                                                                                                                                                                                                                                                                                                                                                                                                                                                                                                                                                                                                                                          | Lighthouse Lab in Milton Keynes                                            | Wellcome Sanger Institute for the COVID-19 Genomics UK (COG-UK) Consortium | The Lighthouse Lab in Milton Keynes and Alex Alderton, Roberto Amato, Jeffrey Barrett, Sonia Goncalves, Ewan Harrison, David K. Jackson, Ian Johnston, Dominic Kwiatkowski, Cordelia Langford, John Sillitoe on behalf of the Wellcome Sanger Institute COVID-19 Surveillance Team                                 |
| EPI_ISL_1034141                                                                                                                                                                                                                                                                                                                                                                                                                                                                                                                                                                                                                                                                                                                                                                                                                                                                                                                                                                                                                                                                                                                                                                                                                                                                                                                                                                                                                                                                                                                                                                                                                                                                                                                                                                                                                                                                                                                                                                                                                                                                                                                                                                                                                                                                                                                                                                                                                                                                                                                                                                                                                                                                                                                                                                                                                                                                                    | Lighthouse Lab in Alderley Park                                            | Wellcome Sanger Institute for the COVID-19 Genomics UK (COG-UK) Consortium | Jacquelyn Wynn, Mairead Hyland, The Lighthouse Lab in Alderley Park and Alex Alderton, Roberto Amato, Jeffrey Barrett, Sonia Goncalves, Ewan Harrison, David K. Jackson, Ian Johnston, Dominic Kwiatkowski, Cordelia Langford, John Sillitoe on behalf of the Wellcome Sanger Institute COVID-19 Surveillance Team |
| EPI_ISL_1034209, EPI_ISL_1034211, EPI_ISL_1034229                                                                                                                                                                                                                                                                                                                                                                                                                                                                                                                                                                                                                                                                                                                                                                                                                                                                                                                                                                                                                                                                                                                                                                                                                                                                                                                                                                                                                                                                                                                                                                                                                                                                                                                                                                                                                                                                                                                                                                                                                                                                                                                                                                                                                                                                                                                                                                                                                                                                                                                                                                                                                                                                                                                                                                                                                                                  | Laboratorio de Virologia HUCA                                              | Laboratorio de Virologia HUCA                                              | Sandoval M, Castelló C, Gómez de Oña J, Boga JA, Rojo S, Alvarez-Arguelles ME, Abreu F, Costales I, Perez-Martínez Z, Martín-Rodríguez G, Coto E, Melón S                                                                                                                                                          |
| EPI_ISL_1034264                                                                                                                                                                                                                                                                                                                                                                                                                                                                                                                                                                                                                                                                                                                                                                                                                                                                                                                                                                                                                                                                                                                                                                                                                                                                                                                                                                                                                                                                                                                                                                                                                                                                                                                                                                                                                                                                                                                                                                                                                                                                                                                                                                                                                                                                                                                                                                                                                                                                                                                                                                                                                                                                                                                                                                                                                                                                                    | National Public Health Laboratory, National Centre for Infectious Diseases | National Public Health Laboratory, National Centre for Infectious Diseases | Tze Minn Mak, Zhenyang Zhou, Lin Cui, Raymond Tzer Pin Lin                                                                                                                                                                                                                                                         |
| EPI_ISL_1034274                                                                                                                                                                                                                                                                                                                                                                                                                                                                                                                                                                                                                                                                                                                                                                                                                                                                                                                                                                                                                                                                                                                                                                                                                                                                                                                                                                                                                                                                                                                                                                                                                                                                                                                                                                                                                                                                                                                                                                                                                                                                                                                                                                                                                                                                                                                                                                                                                                                                                                                                                                                                                                                                                                                                                                                                                                                                                    | Provincial Sanitary and Epidemiological Inspection in Gdask                | Laboratory of Recombinant Vaccines                                         | Lukasz Rabalski, Maciej Kosinski, Maciej Grzybek, Natalia Mazur-Panasiuk, Krzysztof Pyr, Boguslaw Szewczyk, Krystyna Bienkowska-Szewczyk                                                                                                                                                                           |
| EPI_ISL_1034280                                                                                                                                                                                                                                                                                                                                                                                                                                                                                                                                                                                                                                                                                                                                                                                                                                                                                                                                                                                                                                                                                                                                                                                                                                                                                                                                                                                                                                                                                                                                                                                                                                                                                                                                                                                                                                                                                                                                                                                                                                                                                                                                                                                                                                                                                                                                                                                                                                                                                                                                                                                                                                                                                                                                                                                                                                                                                    | INMI Lazzaro Spallanzani IRCCS                                             | INMI Lazzaro Spallanzani IRCCS                                             | Cesare E.M. Gruber, Barbara Bartolini, Emanuela Giombini, Francesco Messina, Martina Rueca, Ornella Butera, Emanuele Nicastri, Alessandra D'Abramo, Antonino Di Caro, Maria R. Capobianchi                                                                                                                         |
| EPI_ISL_1034748, EPI_ISL_1034749, EPI_ISL_1034751, EPI_ISL_1034752                                                                                                                                                                                                                                                                                                                                                                                                                                                                                                                                                                                                                                                                                                                                                                                                                                                                                                                                                                                                                                                                                                                                                                                                                                                                                                                                                                                                                                                                                                                                                                                                                                                                                                                                                                                                                                                                                                                                                                                                                                                                                                                                                                                                                                                                                                                                                                                                                                                                                                                                                                                                                                                                                                                                                                                                                                 | Center of Advanced Studies and Technology, Molecular Genetics Laboratory   | Center of Advanced Studies and Technology, Molecular Genetics Laboratory   | Ferrante Rossella, Mandatori Domitilla, De Fabritiis Simone, Damiani Verena, Anaclerio Federico                                                                                                                                                                                                                    |
| EPI_ISL_1034807, EPI_ISL_1034809, EPI_ISL_1034810, EPI_ISL_1034811                                                                                                                                                                                                                                                                                                                                                                                                                                                                                                                                                                                                                                                                                                                                                                                                                                                                                                                                                                                                                                                                                                                                                                                                                                                                                                                                                                                                                                                                                                                                                                                                                                                                                                                                                                                                                                                                                                                                                                                                                                                                                                                                                                                                                                                                                                                                                                                                                                                                                                                                                                                                                                                                                                                                                                                                                                 | Institute of Medical Microbiology and Hospital Hygiene                     | Institute of Medical Microbiology and Hospital Hygiene                     | Prof. Dr. Achim Kaasch, Aljoscha Tersteegen                                                                                                                                                                                                                                                                        |
| EPI_ISL_1034812, EPI_ISL_1034813, EPI_ISL_1034814                                                                                                                                                                                                                                                                                                                                                                                                                                                                                                                                                                                                                                                                                                                                                                                                                                                                                                                                                                                                                                                                                                                                                                                                                                                                                                                                                                                                                                                                                                                                                                                                                                                                                                                                                                                                                                                                                                                                                                                                                                                                                                                                                                                                                                                                                                                                                                                                                                                                                                                                                                                                                                                                                                                                                                                                                                                  | Landesamt für Verbraucherschutz Sachsen Anhalt, Magdeburg                  | Institute of Medical Microbiology and Hospital Hygiene                     | Prof. Dr. Achim Kaasch, Aljoscha Tersteegen                                                                                                                                                                                                                                                                        |
| EPI_ISL_1034815, EPI_ISL_1034816                                                                                                                                                                                                                                                                                                                                                                                                                                                                                                                                                                                                                                                                                                                                                                                                                                                                                                                                                                                                                                                                                                                                                                                                                                                                                                                                                                                                                                                                                                                                                                                                                                                                                                                                                                                                                                                                                                                                                                                                                                                                                                                                                                                                                                                                                                                                                                                                                                                                                                                                                                                                                                                                                                                                                                                                                                                                   | Institute of Medical Microbiology and Hospital Hygiene                     | Institute of Medical Microbiology and Hospital Hygiene                     | Prof. Dr. Achim Kaasch, Aljoscha Tersteegen                                                                                                                                                                                                                                                                        |
| EPI_ISL_1034817, EPI_ISL_1034821, EPI_ISL_1034822, EPI_ISL_1034823, EPI_ISL_1034824, EPI_ISL_1034825, EPI_ISL_1034826                                                                                                                                                                                                                                                                                                                                                                                                                                                                                                                                                                                                                                                                                                                                                                                                                                                                                                                                                                                                                                                                                                                                                                                                                                                                                                                                                                                                                                                                                                                                                                                                                                                                                                                                                                                                                                                                                                                                                                                                                                                                                                                                                                                                                                                                                                                                                                                                                                                                                                                                                                                                                                                                                                                                                                              | Landesamt für Verbraucherschutz Sachsen Anhalt, Magdeburg                  | Institute of Medical Microbiology and Hospital Hygiene                     | Prof. Dr. Achim Kaasch, Aljoscha Tersteegen                                                                                                                                                                                                                                                                        |
| EPI_ISL_1034827, EPI_ISL_1034828, EPI_ISL_1034829                                                                                                                                                                                                                                                                                                                                                                                                                                                                                                                                                                                                                                                                                                                                                                                                                                                                                                                                                                                                                                                                                                                                                                                                                                                                                                                                                                                                                                                                                                                                                                                                                                                                                                                                                                                                                                                                                                                                                                                                                                                                                                                                                                                                                                                                                                                                                                                                                                                                                                                                                                                                                                                                                                                                                                                                                                                  | Institute of Medical Microbiology and Hospital Hygiene                     | Institute of Medical Microbiology and Hospital Hygiene                     | Prof. Dr. Achim Kaasch, Aljoscha Tersteegen                                                                                                                                                                                                                                                                        |
| EPI_ISL_1034830                                                                                                                                                                                                                                                                                                                                                                                                                                                                                                                                                                                                                                                                                                                                                                                                                                                                                                                                                                                                                                                                                                                                                                                                                                                                                                                                                                                                                                                                                                                                                                                                                                                                                                                                                                                                                                                                                                                                                                                                                                                                                                                                                                                                                                                                                                                                                                                                                                                                                                                                                                                                                                                                                                                                                                                                                                                                                    | Landesamt für Verbraucherschutz Sachsen Anhalt, Magdeburg                  | Institute of Medical Microbiology and Hospital Hygiene                     | Prof. Dr. Achim Kaasch, Aljoscha Tersteegen                                                                                                                                                                                                                                                                        |
| EPI_ISL_1034831, EPI_ISL_1034832, EPI_ISL_1034833                                                                                                                                                                                                                                                                                                                                                                                                                                                                                                                                                                                                                                                                                                                                                                                                                                                                                                                                                                                                                                                                                                                                                                                                                                                                                                                                                                                                                                                                                                                                                                                                                                                                                                                                                                                                                                                                                                                                                                                                                                                                                                                                                                                                                                                                                                                                                                                                                                                                                                                                                                                                                                                                                                                                                                                                                                                  | Institute of Medical Microbiology and Hospital Hygiene                     | Institute of Medical Microbiology and Hospital Hygiene                     | Prof. Dr. Achim Kaasch, Aljoscha Tersteegen                                                                                                                                                                                                                                                                        |
| EPI_ISL_1034835                                                                                                                                                                                                                                                                                                                                                                                                                                                                                                                                                                                                                                                                                                                                                                                                                                                                                                                                                                                                                                                                                                                                                                                                                                                                                                                                                                                                                                                                                                                                                                                                                                                                                                                                                                                                                                                                                                                                                                                                                                                                                                                                                                                                                                                                                                                                                                                                                                                                                                                                                                                                                                                                                                                                                                                                                                                                                    | Landesamt für Verbraucherschutz Sachsen Anhalt, Magdeburg                  | Institute of Medical Microbiology and Hospital Hygiene                     | Prof. Dr. Achim Kaasch, Aljoscha Tersteegen                                                                                                                                                                                                                                                                        |
| EPI_ISL_1034840, EPI_ISL_1034841, EPI_ISL_1034842, EPI_ISL_1034843, EPI_ISL_1034844, EPI_ISL_1034845, EPI_ISL_1034846, EPI_ISL_1034847                                                                                                                                                                                                                                                                                                                                                                                                                                                                                                                                                                                                                                                                                                                                                                                                                                                                                                                                                                                                                                                                                                                                                                                                                                                                                                                                                                                                                                                                                                                                                                                                                                                                                                                                                                                                                                                                                                                                                                                                                                                                                                                                                                                                                                                                                                                                                                                                                                                                                                                                                                                                                                                                                                                                                             | Institute of Medical Microbiology and Hospital Hygiene                     | Institute of Medical Microbiology and Hospital Hygiene                     | Prof. Dr. Achim Kaasch, Aljoscha Tersteegen                                                                                                                                                                                                                                                                        |
| EPI_ISL_1034852                                                                                                                                                                                                                                                                                                                                                                                                                                                                                                                                                                                                                                                                                                                                                                                                                                                                                                                                                                                                                                                                                                                                                                                                                                                                                                                                                                                                                                                                                                                                                                                                                                                                                                                                                                                                                                                                                                                                                                                                                                                                                                                                                                                                                                                                                                                                                                                                                                                                                                                                                                                                                                                                                                                                                                                                                                                                                    | Landesamt für Verbraucherschutz Sachsen Anhalt, Magdeburg                  | Institute of Medical Microbiology and Hospital Hygiene                     | Prof. Dr. Achim Kaasch, Aljoscha Tersteegen                                                                                                                                                                                                                                                                        |
| EPI_ISL_1034854                                                                                                                                                                                                                                                                                                                                                                                                                                                                                                                                                                                                                                                                                                                                                                                                                                                                                                                                                                                                                                                                                                                                                                                                                                                                                                                                                                                                                                                                                                                                                                                                                                                                                                                                                                                                                                                                                                                                                                                                                                                                                                                                                                                                                                                                                                                                                                                                                                                                                                                                                                                                                                                                                                                                                                                                                                                                                    | Institute of Medical Microbiology and Hospital Hygiene                     | Institute of Medical Microbiology and Hospital Hygiene                     | Prof. Dr. Achim Kaasch, Aljoscha Tersteegen                                                                                                                                                                                                                                                                        |
| EPI_ISL_1034855, EPI_ISL_1034856, EPI_ISL_1034857, EPI_ISL_1034858, EPI_ISL_1034859, EPI_ISL_1034862, EPI_ISL_1034864, EPI_ISL_1034865                                                                                                                                                                                                                                                                                                                                                                                                                                                                                                                                                                                                                                                                                                                                                                                                                                                                                                                                                                                                                                                                                                                                                                                                                                                                                                                                                                                                                                                                                                                                                                                                                                                                                                                                                                                                                                                                                                                                                                                                                                                                                                                                                                                                                                                                                                                                                                                                                                                                                                                                                                                                                                                                                                                                                             | Landesamt für Verbraucherschutz Sachsen Anhalt, Magdeburg                  | Institute of Medical Microbiology and Hospital Hygiene                     | Prof. Dr. Achim Kaasch, Aljoscha Tersteegen                                                                                                                                                                                                                                                                        |
| EPI_ISL_1034878, EPI_ISL_1034879                                                                                                                                                                                                                                                                                                                                                                                                                                                                                                                                                                                                                                                                                                                                                                                                                                                                                                                                                                                                                                                                                                                                                                                                                                                                                                                                                                                                                                                                                                                                                                                                                                                                                                                                                                                                                                                                                                                                                                                                                                                                                                                                                                                                                                                                                                                                                                                                                                                                                                                                                                                                                                                                                                                                                                                                                                                                   | Institute of Medical Microbiology and Hospital Hygiene                     | Institute of Medical Microbiology and Hospital Hygiene                     | Prof. Dr. Achim Kaasch, Aljoscha Tersteegen                                                                                                                                                                                                                                                                        |
| EPI_ISL_1034880, EPI_ISL_1034881, EPI_ISL_1034882, EPI_ISL_1034883, EPI_ISL_1034885, EPI_ISL_1034886, EPI_ISL_1034887, EPI_ISL_1034888, EPI_ISL_1034889, EPI_ISL_1034890, EPI_ISL_1034891, EPI_ISL_1034892                                                                                                                                                                                                                                                                                                                                                                                                                                                                                                                                                                                                                                                                                                                                                                                                                                                                                                                                                                                                                                                                                                                                                                                                                                                                                                                                                                                                                                                                                                                                                                                                                                                                                                                                                                                                                                                                                                                                                                                                                                                                                                                                                                                                                                                                                                                                                                                                                                                                                                                                                                                                                                                                                         | Landesamt für Verbraucherschutz Sachsen Anhalt, Magdeburg                  | Institute of Medical Microbiology and Hospital Hygiene                     | Prof. Dr. Achim Kaasch, Aljoscha Tersteegen                                                                                                                                                                                                                                                                        |
| see above                                                                                                                                                                                                                                                                                                                                                                                                                                                                                                                                                                                                                                                                                                                                                                                                                                                                                                                                                                                                                                                                                                                                                                                                                                                                                                                                                                                                                                                                                                                                                                                                                                                                                                                                                                                                                                                                                                                                                                                                                                                                                                                                                                                                                                                                                                                                                                                                                                                                                                                                                                                                                                                                                                                                                                                                                                                                                          | Landesamt für Verbraucherschutz Sachsen Anhalt, Magdeburg                  | Institute of Medical Microbiology and Hospital Hygiene                     | Prof. Dr. Achim Kaasch, Aljoscha Tersteegen                                                                                                                                                                                                                                                                        |
| EPI_ISL_1034893                                                                                                                                                                                                                                                                                                                                                                                                                                                                                                                                                                                                                                                                                                                                                                                                                                                                                                                                                                                                                                                                                                                                                                                                                                                                                                                                                                                                                                                                                                                                                                                                                                                                                                                                                                                                                                                                                                                                                                                                                                                                                                                                                                                                                                                                                                                                                                                                                                                                                                                                                                                                                                                                                                                                                                                                                                                                                    | Institute of Medical Microbiology and Hospital Hygiene                     | Institute of Medical Microbiology and Hospital Hygiene                     | Prof. Dr. Achim Kaasch, Aljoscha Tersteegen                                                                                                                                                                                                                                                                        |
| EPI_ISL_1034894, EPI_ISL_1034895, EPI_ISL_1034896                                                                                                                                                                                                                                                                                                                                                                                                                                                                                                                                                                                                                                                                                                                                                                                                                                                                                                                                                                                                                                                                                                                                                                                                                                                                                                                                                                                                                                                                                                                                                                                                                                                                                                                                                                                                                                                                                                                                                                                                                                                                                                                                                                                                                                                                                                                                                                                                                                                                                                                                                                                                                                                                                                                                                                                                                                                  | Landesamt für Verbraucherschutz Sachsen Anhalt, Magdeburg                  | Institute of Medical Microbiology and Hospital Hygiene                     | Prof. Dr. Achim Kaasch, Aljoscha Tersteegen                                                                                                                                                                                                                                                                        |







[illegible]

[illegible]

[illegible]

[illegible]

[illegible]

[illegible]

[illegible]

[illegible]





[illegible]

[illegible]

[illegible]

[illegible]



[illegible]

[illegible]











|                                                                                                                                                                                                                                                                                                                                                                                                                                                                                                                                                                                                                                                                                                                         |                                                                    |                                                                                                                                                                                            |                                                                                                                                                                                                                                                                                                                                                                                                                                         |
|-------------------------------------------------------------------------------------------------------------------------------------------------------------------------------------------------------------------------------------------------------------------------------------------------------------------------------------------------------------------------------------------------------------------------------------------------------------------------------------------------------------------------------------------------------------------------------------------------------------------------------------------------------------------------------------------------------------------------|--------------------------------------------------------------------|--------------------------------------------------------------------------------------------------------------------------------------------------------------------------------------------|-----------------------------------------------------------------------------------------------------------------------------------------------------------------------------------------------------------------------------------------------------------------------------------------------------------------------------------------------------------------------------------------------------------------------------------------|
|                                                                                                                                                                                                                                                                                                                                                                                                                                                                                                                                                                                                                                                                                                                         |                                                                    | (COG-UK) Consortium                                                                                                                                                                        | Dominic Kwiatkowski, Cordelia Langford, John Sillitoe on behalf of the Wellcome Sanger Institute COVID-19 Surveillance Team                                                                                                                                                                                                                                                                                                             |
| EPI_ISL_1045870                                                                                                                                                                                                                                                                                                                                                                                                                                                                                                                                                                                                                                                                                                         | Lighthouse Lab in Cambridge                                        | Wellcome Sanger Institute for the COVID-19 Genomics UK (COG-UK) Consortium                                                                                                                 | Rob Howes, The Lighthouse Lab in Cambridge and Alex Alderton, Roberto Amato, Jeffrey Barrett, Sonia Goncalves, Ewan Harrison, David K. Jackson, Ian Johnston, Dominic Kwiatkowski, Cordelia Langford, John Sillitoe on behalf of the Wellcome Sanger Institute COVID-19 Surveillance Team                                                                                                                                               |
| EPI_ISL_1045873                                                                                                                                                                                                                                                                                                                                                                                                                                                                                                                                                                                                                                                                                                         | Lighthouse Lab in Milton Keynes                                    | Wellcome Sanger Institute for the COVID-19 Genomics UK (COG-UK) Consortium                                                                                                                 | The Lighthouse Lab in Milton Keynes and Alex Alderton, Roberto Amato, Jeffrey Barrett, Sonia Goncalves, Ewan Harrison, David K. Jackson, Ian Johnston, Dominic Kwiatkowski, Cordelia Langford, John Sillitoe on behalf of the Wellcome Sanger Institute COVID-19 Surveillance Team                                                                                                                                                      |
| EPI_ISL_1045875                                                                                                                                                                                                                                                                                                                                                                                                                                                                                                                                                                                                                                                                                                         | Randox Laboratories                                                | Wellcome Sanger Institute for the COVID-19 Genomics UK (COG-UK) Consortium                                                                                                                 | Randox Laboratories and Alex Alderton, Roberto Amato, Jeffrey Barrett, Sonia Goncalves, Ewan Harrison, David K. Jackson, Ian Johnston, Dominic Kwiatkowski, Cordelia Langford, John Sillitoe on behalf of the Wellcome Sanger Institute COVID-19 Surveillance Team                                                                                                                                                                      |
| EPI_ISL_1045879                                                                                                                                                                                                                                                                                                                                                                                                                                                                                                                                                                                                                                                                                                         | Lighthouse Lab in Milton Keynes                                    | Wellcome Sanger Institute for the COVID-19 Genomics UK (COG-UK) Consortium                                                                                                                 | The Lighthouse Lab in Milton Keynes and Alex Alderton, Roberto Amato, Jeffrey Barrett, Sonia Goncalves, Ewan Harrison, David K. Jackson, Ian Johnston, Dominic Kwiatkowski, Cordelia Langford, John Sillitoe on behalf of the Wellcome Sanger Institute COVID-19 Surveillance Team                                                                                                                                                      |
| EPI_ISL_1045880                                                                                                                                                                                                                                                                                                                                                                                                                                                                                                                                                                                                                                                                                                         | Lighthouse Lab in Cambridge                                        | Wellcome Sanger Institute for the COVID-19 Genomics UK (COG-UK) Consortium                                                                                                                 | Rob Howes, The Lighthouse Lab in Cambridge and Alex Alderton, Roberto Amato, Jeffrey Barrett, Sonia Goncalves, Ewan Harrison, David K. Jackson, Ian Johnston, Dominic Kwiatkowski, Cordelia Langford, John Sillitoe on behalf of the Wellcome Sanger Institute COVID-19 Surveillance Team                                                                                                                                               |
| EPI_ISL_1045883, EPI_ISL_1045885, EPI_ISL_1045888                                                                                                                                                                                                                                                                                                                                                                                                                                                                                                                                                                                                                                                                       | Lighthouse Lab in Milton Keynes                                    | Wellcome Sanger Institute for the COVID-19 Genomics UK (COG-UK) Consortium                                                                                                                 | The Lighthouse Lab in Milton Keynes and Alex Alderton, Roberto Amato, Jeffrey Barrett, Sonia Goncalves, Ewan Harrison, David K. Jackson, Ian Johnston, Dominic Kwiatkowski, Cordelia Langford, John Sillitoe on behalf of the Wellcome Sanger Institute COVID-19 Surveillance Team                                                                                                                                                      |
| EPI_ISL_1045898, EPI_ISL_1045899                                                                                                                                                                                                                                                                                                                                                                                                                                                                                                                                                                                                                                                                                        | Lighthouse Lab in Cambridge                                        | Wellcome Sanger Institute for the COVID-19 Genomics UK (COG-UK) Consortium                                                                                                                 | Rob Howes, The Lighthouse Lab in Cambridge and Alex Alderton, Roberto Amato, Jeffrey Barrett, Sonia Goncalves, Ewan Harrison, David K. Jackson, Ian Johnston, Dominic Kwiatkowski, Cordelia Langford, John Sillitoe on behalf of the Wellcome Sanger Institute COVID-19 Surveillance Team                                                                                                                                               |
| EPI_ISL_1045902                                                                                                                                                                                                                                                                                                                                                                                                                                                                                                                                                                                                                                                                                                         | Lighthouse Lab in Milton Keynes                                    | Wellcome Sanger Institute for the COVID-19 Genomics UK (COG-UK) Consortium                                                                                                                 | The Lighthouse Lab in Milton Keynes and Alex Alderton, Roberto Amato, Jeffrey Barrett, Sonia Goncalves, Ewan Harrison, David K. Jackson, Ian Johnston, Dominic Kwiatkowski, Cordelia Langford, John Sillitoe on behalf of the Wellcome Sanger Institute COVID-19 Surveillance Team                                                                                                                                                      |
| EPI_ISL_1045903                                                                                                                                                                                                                                                                                                                                                                                                                                                                                                                                                                                                                                                                                                         | Lighthouse Lab in Cambridge                                        | Wellcome Sanger Institute for the COVID-19 Genomics UK (COG-UK) Consortium                                                                                                                 | Rob Howes, The Lighthouse Lab in Cambridge and Alex Alderton, Roberto Amato, Jeffrey Barrett, Sonia Goncalves, Ewan Harrison, David K. Jackson, Ian Johnston, Dominic Kwiatkowski, Cordelia Langford, John Sillitoe on behalf of the Wellcome Sanger Institute COVID-19 Surveillance Team                                                                                                                                               |
| EPI_ISL_1045905, EPI_ISL_1045906, EPI_ISL_1045909, EPI_ISL_1045915, EPI_ISL_1045919, EPI_ISL_1045923, EPI_ISL_1045929, EPI_ISL_1045934, EPI_ISL_1045936, EPI_ISL_1045940, EPI_ISL_1045941                                                                                                                                                                                                                                                                                                                                                                                                                                                                                                                               | see above                                                          | Wellcome Sanger Institute for the COVID-19 Genomics UK (COG-UK) Consortium                                                                                                                 | The Lighthouse Lab in Milton Keynes and Alex Alderton, Roberto Amato, Jeffrey Barrett, Sonia Goncalves, Ewan Harrison, David K. Jackson, Ian Johnston, Dominic Kwiatkowski, Cordelia Langford, John Sillitoe on behalf of the Wellcome Sanger Institute COVID-19 Surveillance Team                                                                                                                                                      |
| EPI_ISL_1045943                                                                                                                                                                                                                                                                                                                                                                                                                                                                                                                                                                                                                                                                                                         | Lighthouse Lab in Cambridge                                        | Wellcome Sanger Institute for the COVID-19 Genomics UK (COG-UK) Consortium                                                                                                                 | Rob Howes, The Lighthouse Lab in Cambridge and Alex Alderton, Roberto Amato, Jeffrey Barrett, Sonia Goncalves, Ewan Harrison, David K. Jackson, Ian Johnston, Dominic Kwiatkowski, Cordelia Langford, John Sillitoe on behalf of the Wellcome Sanger Institute COVID-19 Surveillance Team                                                                                                                                               |
| EPI_ISL_1045944, EPI_ISL_1045952, EPI_ISL_1045959, EPI_ISL_1045960, EPI_ISL_1045964, EPI_ISL_1045966                                                                                                                                                                                                                                                                                                                                                                                                                                                                                                                                                                                                                    | Lighthouse Lab in Milton Keynes                                    | Wellcome Sanger Institute for the COVID-19 Genomics UK (COG-UK) Consortium                                                                                                                 | The Lighthouse Lab in Milton Keynes and Alex Alderton, Roberto Amato, Jeffrey Barrett, Sonia Goncalves, Ewan Harrison, David K. Jackson, Ian Johnston, Dominic Kwiatkowski, Cordelia Langford, John Sillitoe on behalf of the Wellcome Sanger Institute COVID-19 Surveillance Team                                                                                                                                                      |
| EPI_ISL_1045974, EPI_ISL_1045975, EPI_ISL_1045977, EPI_ISL_1045978                                                                                                                                                                                                                                                                                                                                                                                                                                                                                                                                                                                                                                                      | Lighthouse Lab in Alderley Park                                    | Wellcome Sanger Institute for the COVID-19 Genomics UK (COG-UK) Consortium                                                                                                                 | Jacquelyn Wynn, Mairead Hyland, The Lighthouse Lab in Alderley Park and Alex Alderton, Roberto Amato, Jeffrey Barrett, Sonia Goncalves, Ewan Harrison, David K. Jackson, Ian Johnston, Dominic Kwiatkowski, Cordelia Langford, John Sillitoe on behalf of the Wellcome Sanger Institute COVID-19 Surveillance Team                                                                                                                      |
| EPI_ISL_1046116                                                                                                                                                                                                                                                                                                                                                                                                                                                                                                                                                                                                                                                                                                         | Randox Laboratories                                                | Wellcome Sanger Institute for the COVID-19 Genomics UK (COG-UK) Consortium                                                                                                                 | Randox Laboratories and Alex Alderton, Roberto Amato, Jeffrey Barrett, Sonia Goncalves, Ewan Harrison, David K. Jackson, Ian Johnston, Dominic Kwiatkowski, Cordelia Langford, John Sillitoe on behalf of the Wellcome Sanger Institute COVID-19 Surveillance Team                                                                                                                                                                      |
| EPI_ISL_1046336                                                                                                                                                                                                                                                                                                                                                                                                                                                                                                                                                                                                                                                                                                         | Lighthouse Lab in Cambridge                                        | Wellcome Sanger Institute for the COVID-19 Genomics UK (COG-UK) Consortium                                                                                                                 | Rob Howes, The Lighthouse Lab in Cambridge and Alex Alderton, Roberto Amato, Jeffrey Barrett, Sonia Goncalves, Ewan Harrison, David K. Jackson, Ian Johnston, Dominic Kwiatkowski, Cordelia Langford, John Sillitoe on behalf of the Wellcome Sanger Institute COVID-19 Surveillance Team                                                                                                                                               |
| EPI_ISL_1046557, EPI_ISL_1046569                                                                                                                                                                                                                                                                                                                                                                                                                                                                                                                                                                                                                                                                                        | Randox Laboratories                                                | Wellcome Sanger Institute for the COVID-19 Genomics UK (COG-UK) Consortium                                                                                                                 | Randox Laboratories and Alex Alderton, Roberto Amato, Jeffrey Barrett, Sonia Goncalves, Ewan Harrison, David K. Jackson, Ian Johnston, Dominic Kwiatkowski, Cordelia Langford, John Sillitoe on behalf of the Wellcome Sanger Institute COVID-19 Surveillance Team                                                                                                                                                                      |
| EPI_ISL_1046762, EPI_ISL_1046763, EPI_ISL_1046764, EPI_ISL_1046765                                                                                                                                                                                                                                                                                                                                                                                                                                                                                                                                                                                                                                                      | SARS-CoV-2 testing team, National Institute of Infectious Diseases | Pathogen Genomics Center, National Institute of Infectious Diseases                                                                                                                        | Tsuyoshi Sekizuka, Kentaro Itokawa, Rina Tanaka, Masanori Hashino, Koichi Ishikawa, Midori Nakamura-Hoshi, Shigeru Kusagawa, Makoto Kuroda                                                                                                                                                                                                                                                                                              |
| EPI_ISL_1046768, EPI_ISL_1046777                                                                                                                                                                                                                                                                                                                                                                                                                                                                                                                                                                                                                                                                                        | SARS-CoV-2 testing team, National Institute of Infectious Diseases | Pathogen Genomics Center, National Institute of Infectious Diseases                                                                                                                        | Tsuyoshi Sekizuka, Kentaro Itokawa, Rina Tanaka, Masanori Hashino, Takahiro Maeki, Motohiko Ogawa, Chang-Kweng Lim, Makoto Kuroda                                                                                                                                                                                                                                                                                                       |
| EPI_ISL_1046778, EPI_ISL_1046784                                                                                                                                                                                                                                                                                                                                                                                                                                                                                                                                                                                                                                                                                        | SARS-CoV-2 testing team, National Institute of Infectious Diseases | Pathogen Genomics Center, National Institute of Infectious Diseases                                                                                                                        | Tsuyoshi Sekizuka, Kentaro Itokawa, Rina Tanaka, Masanori Hashino, Eri Nakayama, Shigeru Tajima, Chang-Kweng Lim, Makoto Kuroda                                                                                                                                                                                                                                                                                                         |
| EPI_ISL_1046786, EPI_ISL_1046787                                                                                                                                                                                                                                                                                                                                                                                                                                                                                                                                                                                                                                                                                        | SARS-CoV-2 testing team, National Institute of Infectious Diseases | Pathogen Genomics Center, National Institute of Infectious Diseases                                                                                                                        | Tsuyoshi Sekizuka, Kentaro Itokawa, Rina Tanaka, Masanori Hashino, Takahiro Maeki, Motohiko Ogawa, Chang-Kweng Lim, Makoto Kuroda                                                                                                                                                                                                                                                                                                       |
| EPI_ISL_1046788                                                                                                                                                                                                                                                                                                                                                                                                                                                                                                                                                                                                                                                                                                         | SARS-CoV-2 testing team, National Institute of Infectious Diseases | Pathogen Genomics Center, National Institute of Infectious Diseases                                                                                                                        | Tsuyoshi Sekizuka, Kentaro Itokawa, Rina Tanaka, Masanori Hashino, Tadashi Kikuchi, Lucky Ronald Runtuwene, Shigeru Kusagawa, Makoto Kuroda                                                                                                                                                                                                                                                                                             |
| EPI_ISL_1046789, EPI_ISL_1046790                                                                                                                                                                                                                                                                                                                                                                                                                                                                                                                                                                                                                                                                                        | SARS-CoV-2 testing team, National Institute of Infectious Diseases | Pathogen Genomics Center, National Institute of Infectious Diseases                                                                                                                        | Tsuyoshi Sekizuka, Kentaro Itokawa, Rina Tanaka, Masanori Hashino, Koichi Ishikawa, Midori Nakamura-Hoshi, Shigeru Kusagawa, Makoto Kuroda                                                                                                                                                                                                                                                                                              |
| EPI_ISL_1046796, EPI_ISL_1046797, EPI_ISL_1046798, EPI_ISL_1046801, EPI_ISL_1046803, EPI_ISL_1046807, EPI_ISL_1046808, EPI_ISL_1046810, EPI_ISL_1046811, EPI_ISL_1046812, EPI_ISL_1046814, EPI_ISL_1046820, EPI_ISL_1046831, EPI_ISL_1046832, EPI_ISL_1046834, EPI_ISL_1046835, EPI_ISL_1046839, EPI_ISL_1046841, EPI_ISL_1046842, EPI_ISL_1046844, EPI_ISL_1046845, EPI_ISL_1046848, EPI_ISL_1046849, EPI_ISL_1046850, EPI_ISL_1046851, EPI_ISL_1046854, EPI_ISL_1046855, EPI_ISL_1046856, EPI_ISL_1046857, EPI_ISL_1046858, EPI_ISL_1046859, EPI_ISL_1046860, EPI_ISL_1046862, EPI_ISL_1046865, EPI_ISL_1046866, EPI_ISL_1046868, EPI_ISL_1046877, EPI_ISL_1046880, EPI_ISL_1046881, EPI_ISL_1046883, EPI_ISL_1046884 | see above                                                          | Servicio de Microbiología, Laboratori Clínic Metropolitana Nord, Hospital Universitari Germans Trias i Pujol, Institut d'Investigació en Ciències de la Salut Germans Trias i Pujol (IGTP) |                                                                                                                                                                                                                                                                                                                                                                                                                                         |
| EPI_ISL_1046953, EPI_ISL_1046961, EPI_ISL_1046963, EPI_ISL_1046964, EPI_ISL_1046968, EPI_ISL_1046969, EPI_ISL_1046973, EPI_ISL_1046978, EPI_ISL_1047029, EPI_ISL_1047033, EPI_ISL_1047035, EPI_ISL_1047046, EPI_ISL_1047047, EPI_ISL_1047052                                                                                                                                                                                                                                                                                                                                                                                                                                                                            | see above                                                          | IrsiCaixa - Can Ruti CovidSeq                                                                                                                                                              | Marc Noguera-Julian, Mariona Parera, Maria Casadellà, Pilar Armengol, Francesc Catala-Moll, Roger Paredes, Bonaventura Clotet Elisa Martró, Verónica Saludes, Anna Not, Ana Pérez, Montserrat Giménez, Ignacio Blanco, Cristina Esteban, Cristina Casañ, Antoni E. Bordoy, Adrián Antuori                                                                                                                                               |
| EPI_ISL_1047070, EPI_ISL_1047072, EPI_ISL_1047073, EPI_ISL_1047074, EPI_ISL_1047081, EPI_ISL_1047083, EPI_ISL_1047087, EPI_ISL_1047088, EPI_ISL_1047091, EPI_ISL_1047092, EPI_ISL_1047094, EPI_ISL_1047096, EPI_ISL_1047101, EPI_ISL_1047104, EPI_ISL_1047108, EPI_ISL_1047110, EPI_ISL_1047111, EPI_ISL_1047112, EPI_ISL_1047114, EPI_ISL_1047115                                                                                                                                                                                                                                                                                                                                                                      | see above                                                          | University of Birmingham                                                                                                                                                                   | Institute of Microbiology, University of Birmingham: Claire McMurray, Joanne Stockton, Samuel Nicholls, Radoslaw Poplawski, Will Rowe, Josh Quick, Nicholas Loman. University of Birmingham Testing Laboratory: Celina M Whalley, Andrew Bosworth, Charlotte Poxon, Kasun Wanigasooriya, Oliver Pickles, Mike Kidd, Alex Richter, Andrew D Beggs PHE Heartlands Lab: Husam Osman, Andrew Bosworth. Queen Elizabeth Hospital: Anna Casey |
|                                                                                                                                                                                                                                                                                                                                                                                                                                                                                                                                                                                                                                                                                                                         | Department of Pathology, University of Cambridge                   | COVID-19 Genomics UK (COG-UK) Consortium                                                                                                                                                   | Aminu S. Jahun, Yasmin Chaudhry, Ilana Georgana, Myra Hosmillo, Rhys Izuagbe, William L. Hamilton, Martin D. Curran, Surendra Parmar, Ian Goodfellow                                                                                                                                                                                                                                                                                    |

We gratefully acknowledge the following Authors from the Originating laboratories responsible for obtaining the specimens, as well as the Submitting laboratories where the genome data were generated and shared via GISAID, on which this research is based.

All Submitters of data may be contacted directly via [www.gisaid.org](http://www.gisaid.org)

Authors are sorted alphabetically.

| Accession ID                                                                                                                                                                                                                                                                                                                                                                                                                                                                                                                                                                                                                                                                                                                                                                                                                                                                                                                                                                                                                                                                                                                                                                                                        | Originating Laboratory                                                                                                                                                                  | Submitting Laboratory                                                                                                                                                                   | Authors                                                                                                                                                                                                                                                                                                                                                                                                                                                                                                                                                                                                                                                                                                                                                       |
|---------------------------------------------------------------------------------------------------------------------------------------------------------------------------------------------------------------------------------------------------------------------------------------------------------------------------------------------------------------------------------------------------------------------------------------------------------------------------------------------------------------------------------------------------------------------------------------------------------------------------------------------------------------------------------------------------------------------------------------------------------------------------------------------------------------------------------------------------------------------------------------------------------------------------------------------------------------------------------------------------------------------------------------------------------------------------------------------------------------------------------------------------------------------------------------------------------------------|-----------------------------------------------------------------------------------------------------------------------------------------------------------------------------------------|-----------------------------------------------------------------------------------------------------------------------------------------------------------------------------------------|---------------------------------------------------------------------------------------------------------------------------------------------------------------------------------------------------------------------------------------------------------------------------------------------------------------------------------------------------------------------------------------------------------------------------------------------------------------------------------------------------------------------------------------------------------------------------------------------------------------------------------------------------------------------------------------------------------------------------------------------------------------|
| EPI_ISL_1047118, EPI_ISL_1047120, EPI_ISL_1047123, EPI_ISL_1047125, EPI_ISL_1047126, EPI_ISL_1047127, EPI_ISL_1047128, EPI_ISL_1047130, EPI_ISL_1047131, EPI_ISL_1047132, EPI_ISL_1047133, EPI_ISL_1047134, EPI_ISL_1047135, EPI_ISL_1047138, EPI_ISL_1047141, EPI_ISL_1047145, EPI_ISL_1047147                                                                                                                                                                                                                                                                                                                                                                                                                                                                                                                                                                                                                                                                                                                                                                                                                                                                                                                     |                                                                                                                                                                                         |                                                                                                                                                                                         |                                                                                                                                                                                                                                                                                                                                                                                                                                                                                                                                                                                                                                                                                                                                                               |
| see above                                                                                                                                                                                                                                                                                                                                                                                                                                                                                                                                                                                                                                                                                                                                                                                                                                                                                                                                                                                                                                                                                                                                                                                                           | Department of Pathology, University of Cambridge                                                                                                                                        | COVID-19 Genomics UK (COG-UK) Consortium                                                                                                                                                | Aminu S. Jahun, Yasmin Chaudhry, Iliana Georgana, Myra Hosmillo, Rhys Izuagbe, William L. Hamilton, Martin D. Curran, Surendra Parmar, Ian Goodfellow                                                                                                                                                                                                                                                                                                                                                                                                                                                                                                                                                                                                         |
| EPI_ISL_1047834, EPI_ISL_1047842, EPI_ISL_1047849, EPI_ISL_1047851, EPI_ISL_1047853, EPI_ISL_1047854                                                                                                                                                                                                                                                                                                                                                                                                                                                                                                                                                                                                                                                                                                                                                                                                                                                                                                                                                                                                                                                                                                                | West of Scotland Specialist Virology Centre, NHSGGC / MRC-University of Glasgow Centre for Virus Research                                                                               | COVID-19 Genomics UK (COG-UK) Consortium                                                                                                                                                | Ana da Silva Filipe, Natasha Johnson, Kathy Smollett, Daniel Mair, Stephen Carmichael, Alice Broos, Lily Tong, Jenna Nichols, Kyriaki Nomikou; Sarah McDonald; Richard Orton, Joseph Hughes, Sreenu Vattipally, David L Robertson; Alasdair MacLean, Rory Gunson; Sharif Shaaban, Matthew Holden; Rachel Blacow, Guy Mollett, Kathy Li, James Shepherd, Antonia Ho, Emma Thomson                                                                                                                                                                                                                                                                                                                                                                              |
| EPI_ISL_1047871, EPI_ISL_1047873, EPI_ISL_1047875, EPI_ISL_1047876, EPI_ISL_1047878, EPI_ISL_1047879, EPI_ISL_1047880, EPI_ISL_1047881, EPI_ISL_1047882, EPI_ISL_1047883, EPI_ISL_1047884, EPI_ISL_1047889, EPI_ISL_1047891, EPI_ISL_1047894, EPI_ISL_1047895, EPI_ISL_1047899, EPI_ISL_1047901, EPI_ISL_1047905, EPI_ISL_1047906, EPI_ISL_1047907, EPI_ISL_1047908, EPI_ISL_1047909, EPI_ISL_1047910, EPI_ISL_1047913                                                                                                                                                                                                                                                                                                                                                                                                                                                                                                                                                                                                                                                                                                                                                                                              |                                                                                                                                                                                         |                                                                                                                                                                                         |                                                                                                                                                                                                                                                                                                                                                                                                                                                                                                                                                                                                                                                                                                                                                               |
| see above                                                                                                                                                                                                                                                                                                                                                                                                                                                                                                                                                                                                                                                                                                                                                                                                                                                                                                                                                                                                                                                                                                                                                                                                           | Virology Department, Royal Infirmary of Edinburgh, NHS Lothian / School of Biological Sciences, University of Edinburgh                                                                 | COVID-19 Genomics UK (COG-UK) Consortium                                                                                                                                                | McHugh M, Dewar R, Cotton S, Rooke S, O'Toole Á, Scher E, Hill V, McCrone JT, Colquhoun R, Yu X, Jackson B, Rambaut A, Templeton K                                                                                                                                                                                                                                                                                                                                                                                                                                                                                                                                                                                                                            |
| EPI_ISL_1048061, EPI_ISL_1048065, EPI_ISL_1048106, EPI_ISL_1048116, EPI_ISL_1048119, EPI_ISL_1048125, EPI_ISL_1048127                                                                                                                                                                                                                                                                                                                                                                                                                                                                                                                                                                                                                                                                                                                                                                                                                                                                                                                                                                                                                                                                                               | Barts Health NHS Trust                                                                                                                                                                  | COVID-19 Genomics UK (COG-UK) Consortium                                                                                                                                                | CUTINO-MOGUEL, Maria-Teresa; HARRINGTON, David; OWOYEMI, Dola; KULASEGARAN-SHYLINI, Raghavendran; BROAD, Claire; KELE, Beatrix                                                                                                                                                                                                                                                                                                                                                                                                                                                                                                                                                                                                                                |
| EPI_ISL_1048367                                                                                                                                                                                                                                                                                                                                                                                                                                                                                                                                                                                                                                                                                                                                                                                                                                                                                                                                                                                                                                                                                                                                                                                                     | Department for Virology, Molecular Biology and Genome Research, R. G. Lugar Center for Public Health Research, National Center for Disease Control and Public Health (NCDC) of Georgia. | Department for Virology, Molecular Biology and Genome Research, R. G. Lugar Center for Public Health Research, National Center for Disease Control and Public Health (NCDC) of Georgia. | Gvantsa Brachveli, Meri Pantsulaia, Giorgi Gogoladze, Giorgi Tomashvili, Nino Berishvili, Tata Imnadze, Ana Papkiauri, Gvantsa Chanturia, Ann Machablishvili, Nato Kotaria, Marine Murtskhvaladze, Lela Sabadze, Mari Gavashelidze, Tamar Jashiasvili, Tea Tsvdoradze, Ketevan Sidamonidze, Ekaterine Khmaladze, Ekaterine Zhghenti, Roena Sukhiasvili, Mariam Zakalashvili, Lela Urushadze, Magda Dgebuadze, Davit Tsaguria, Ekaterine Zangaladze, Adam Kotorashvili, Maia Alkhazashvili, Irma Burjanadze, Anna Kasradze, Khatuna Zakhashvili, Paata Imnadze, Amiran Gamkrelidze.                                                                                                                                                                            |
| EPI_ISL_1048371                                                                                                                                                                                                                                                                                                                                                                                                                                                                                                                                                                                                                                                                                                                                                                                                                                                                                                                                                                                                                                                                                                                                                                                                     | Megalab, Molecular and Cytogenetics Diagnostics                                                                                                                                         | Department for Virology, Molecular Biology and Genome Research, R. G. Lugar Center for Public Health Research, National Center for Disease Control and Public Health (NCDC) of Georgia. | Giorgi Tomashvili, Gvantsa Brachveli, Meri Pantsulaia, Giorgi Gogoladze, Nino Berishvili, Tata Imnadze, Ana Papkiauri, Gvantsa Chanturia, Ann Machablishvili, Nato Kotaria, Marine Murtskhvaladze, Lela Sabadze, Mari Gavashelidze, Tamar Jashiasvili, Tea Tsvdoradze, Ketevan Sidamonidze, Ekaterine Khmaladze, Ekaterine Zhghenti, Roena Sukhiasvili, Mariam Zakalashvili, Lela Urushadze, Magda Dgebuadze, Davit Tsaguria, Ekaterine Zangaladze, Adam Kotorashvili, Maia Alkhazashvili, Irma Burjanadze, Anna Kasradze, Khatuna Zakhashvili, Paata Imnadze, Amiran Gamkrelidze. Submitter information                                                                                                                                                      |
| EPI_ISL_1048407, EPI_ISL_1048408, EPI_ISL_1048409, EPI_ISL_1048410, EPI_ISL_1048411, EPI_ISL_1048412, EPI_ISL_1048413, EPI_ISL_1048414, EPI_ISL_1048415, EPI_ISL_1048416, EPI_ISL_1048417, EPI_ISL_1048418, EPI_ISL_1048419, EPI_ISL_1048420, EPI_ISL_1048421, EPI_ISL_1048422, EPI_ISL_1048423, EPI_ISL_1048424, EPI_ISL_1048425, EPI_ISL_1048426, EPI_ISL_1048427, EPI_ISL_1048428, EPI_ISL_1048429, EPI_ISL_1048430                                                                                                                                                                                                                                                                                                                                                                                                                                                                                                                                                                                                                                                                                                                                                                                              |                                                                                                                                                                                         |                                                                                                                                                                                         |                                                                                                                                                                                                                                                                                                                                                                                                                                                                                                                                                                                                                                                                                                                                                               |
| see above                                                                                                                                                                                                                                                                                                                                                                                                                                                                                                                                                                                                                                                                                                                                                                                                                                                                                                                                                                                                                                                                                                                                                                                                           | Wojewódzka Stacja Sanitarno-Epidemiologiczna w Olsztynie, Laboratorium Bada Epidemiologiczno-Klinicznych                                                                                | Wojewódzka Stacja Sanitarno-Epidemiologiczna w Olsztynie, Laboratorium Bada Epidemiologiczno-Klinicznych                                                                                | Sylvia Krztowska, Monika Czerwiska, Barbara Doliska, Ewa Liszewska, Tomasz Jakubczak, Marta ukian, Patryk Bielecki, Aleksandra Kobiatko, Emilia Tarabasz, Paulina Róycka, Beata Wasiek                                                                                                                                                                                                                                                                                                                                                                                                                                                                                                                                                                        |
| EPI_ISL_1048597, EPI_ISL_1048598, EPI_ISL_1048610, EPI_ISL_1048612, EPI_ISL_1048613, EPI_ISL_1048617, EPI_ISL_1048618, EPI_ISL_1048722, EPI_ISL_1048723, EPI_ISL_1048725, EPI_ISL_1048726, EPI_ISL_1048727, EPI_ISL_1048728, EPI_ISL_1048729, EPI_ISL_1048730, EPI_ISL_1048731, EPI_ISL_1048732, EPI_ISL_1048733, EPI_ISL_1048734, EPI_ISL_1048735, EPI_ISL_1048736, EPI_ISL_1048737, EPI_ISL_1048738, EPI_ISL_1048739, EPI_ISL_1048740, EPI_ISL_1048741, EPI_ISL_1048742, EPI_ISL_1048744, EPI_ISL_1048746, EPI_ISL_1048748, EPI_ISL_1048749, EPI_ISL_1048750, EPI_ISL_1048751, EPI_ISL_1048752, EPI_ISL_1048753, EPI_ISL_1048754, EPI_ISL_1048755, EPI_ISL_1048756, EPI_ISL_1048757, EPI_ISL_1048758, EPI_ISL_1048759, EPI_ISL_1048760, EPI_ISL_1048761, EPI_ISL_1048762, EPI_ISL_1048764, EPI_ISL_1048765, EPI_ISL_1048768, EPI_ISL_1048769, EPI_ISL_1048770, EPI_ISL_1048772, EPI_ISL_1048773, EPI_ISL_1048774, EPI_ISL_1048775, EPI_ISL_1048776, EPI_ISL_1048779, EPI_ISL_1048780, EPI_ISL_1048781, EPI_ISL_1048782, EPI_ISL_1048783, EPI_ISL_1048784, EPI_ISL_1048786, EPI_ISL_1048787, EPI_ISL_1048788, EPI_ISL_1048789, EPI_ISL_1048791, EPI_ISL_1048792, EPI_ISL_1048793, EPI_ISL_1048794, EPI_ISL_1048796 |                                                                                                                                                                                         |                                                                                                                                                                                         |                                                                                                                                                                                                                                                                                                                                                                                                                                                                                                                                                                                                                                                                                                                                                               |
| see above                                                                                                                                                                                                                                                                                                                                                                                                                                                                                                                                                                                                                                                                                                                                                                                                                                                                                                                                                                                                                                                                                                                                                                                                           | Maine HETL                                                                                                                                                                              | Tewhey Lab, The Jackson Laboratory                                                                                                                                                      | Matluk,N., Dewey,H., Isoue,F., Barter,M., Lynch,R., Munger,H. and Tewhey,R.                                                                                                                                                                                                                                                                                                                                                                                                                                                                                                                                                                                                                                                                                   |
| EPI_ISL_1048804                                                                                                                                                                                                                                                                                                                                                                                                                                                                                                                                                                                                                                                                                                                                                                                                                                                                                                                                                                                                                                                                                                                                                                                                     | Arizona State University                                                                                                                                                                | Arizona State University                                                                                                                                                                | Emily A. Kaelin, LaRinda A. Holland, Peter T. Skidmore, Nicholas J. Mellor, Kristina Buss, Joy M. Blain, Neal W Woodbury, Valerie Harris, Joshua LaBaer, Vel Murugan, Efrem S. Lim                                                                                                                                                                                                                                                                                                                                                                                                                                                                                                                                                                            |
| EPI_ISL_1048825                                                                                                                                                                                                                                                                                                                                                                                                                                                                                                                                                                                                                                                                                                                                                                                                                                                                                                                                                                                                                                                                                                                                                                                                     | Azienda Sanitaria dell'Alto Adige Laboratorio Aziendale di Microbiologia e Virologia                                                                                                    | Istituto di Genomica Applicata                                                                                                                                                          | Elisabetta Paganì, Irene Bianconi, Elisabetta Giacobazzi, Elisa Masi, Stefanie Wieser, Irena Jurman, Vera Vendramin, Gabriele Magris, Eleonora Paparelli, Davide Scaglione, Michele Morgante                                                                                                                                                                                                                                                                                                                                                                                                                                                                                                                                                                  |
| EPI_ISL_1049130                                                                                                                                                                                                                                                                                                                                                                                                                                                                                                                                                                                                                                                                                                                                                                                                                                                                                                                                                                                                                                                                                                                                                                                                     | KU Leuven, Rega Institute, Clinical and Epidemiological Virology                                                                                                                        | KU Leuven, Rega Institute, Clinical and Epidemiological Virology                                                                                                                        | Tony Wawina-Bokalanga, Bert Vanmechelen, Joan Marti-Carerras, Piet Maes                                                                                                                                                                                                                                                                                                                                                                                                                                                                                                                                                                                                                                                                                       |
| EPI_ISL_1049214                                                                                                                                                                                                                                                                                                                                                                                                                                                                                                                                                                                                                                                                                                                                                                                                                                                                                                                                                                                                                                                                                                                                                                                                     | PA Department of Health, Bureau of Laboratories                                                                                                                                         | Pathogen Discovery, Respiratory Viruses Branch, Division of Viral Diseases, Centers for Disease Control and Prevention                                                                  | Ying Tao, Jing Zhang, Yan Li, Brian Lynch, Krista Queen, Anna Uehara, Peter Cook, Han Jia Ng, Clinton R. Paden, Haibin Wang, Suxiang Tong                                                                                                                                                                                                                                                                                                                                                                                                                                                                                                                                                                                                                     |
| EPI_ISL_1049224                                                                                                                                                                                                                                                                                                                                                                                                                                                                                                                                                                                                                                                                                                                                                                                                                                                                                                                                                                                                                                                                                                                                                                                                     | TN Division of Laboratory Services                                                                                                                                                      | Pathogen Discovery, Respiratory Viruses Branch, Division of Viral Diseases, Centers for Disease Control and Prevention                                                                  | Ying Tao, Jing Zhang, Yan Li, Brian Lynch, Krista Queen, Anna Uehara, Peter Cook, Han Jia Ng, Clinton R. Paden, Haibin Wang, Suxiang Tong                                                                                                                                                                                                                                                                                                                                                                                                                                                                                                                                                                                                                     |
| EPI_ISL_1049228, EPI_ISL_1049229, EPI_ISL_1049230, EPI_ISL_1049231, EPI_ISL_1049232, EPI_ISL_1049233, EPI_ISL_1049234, EPI_ISL_1049235, EPI_ISL_1049236, EPI_ISL_1049237, EPI_ISL_1049238, EPI_ISL_1049239, EPI_ISL_1049240, EPI_ISL_1049241, EPI_ISL_1049242                                                                                                                                                                                                                                                                                                                                                                                                                                                                                                                                                                                                                                                                                                                                                                                                                                                                                                                                                       |                                                                                                                                                                                         |                                                                                                                                                                                         |                                                                                                                                                                                                                                                                                                                                                                                                                                                                                                                                                                                                                                                                                                                                                               |
| see above                                                                                                                                                                                                                                                                                                                                                                                                                                                                                                                                                                                                                                                                                                                                                                                                                                                                                                                                                                                                                                                                                                                                                                                                           | Utah Public Health Laboratory                                                                                                                                                           | Utah Public Health Laboratory                                                                                                                                                           | Erin L. Young, Kelly F. Oakeson, Tara Gallagher                                                                                                                                                                                                                                                                                                                                                                                                                                                                                                                                                                                                                                                                                                               |
| EPI_ISL_1049260                                                                                                                                                                                                                                                                                                                                                                                                                                                                                                                                                                                                                                                                                                                                                                                                                                                                                                                                                                                                                                                                                                                                                                                                     | Struttura Semplice Dipartimentale di Virologia e Microbiologia molecolare, Azienda Ospedaliero-Universitaria, Policlinico di Modena                                                     | U.O. Microbiologia, Laboratorio Unico Centro Servizi - AUSL della Romagna                                                                                                               | Pecorari Monica, Gennari William, Fregni Serpini Giulia, Giorgio Dirani, Silvia Zannoli, Vittorio Sambri                                                                                                                                                                                                                                                                                                                                                                                                                                                                                                                                                                                                                                                      |
| EPI_ISL_1049482                                                                                                                                                                                                                                                                                                                                                                                                                                                                                                                                                                                                                                                                                                                                                                                                                                                                                                                                                                                                                                                                                                                                                                                                     | MSHS Clinical Microbiology Laboratories                                                                                                                                                 | MSHS Pathogen Surveillance Program                                                                                                                                                      | Ana S. Gonzalez-Reiche, Hala Alshammary, Mitchell J. Sullivan, Brianne Ciferri, Ajay Obla, Angela Amoako, Mahmoud Awawda, Daniel Floda, Julia Matthews, Ashley Salimbangon, Levy Sominsky, Katherine Beach, Kayla Russo, Charles Gleason, Sheldie Fabre, Giulio Kleiner, Zenab Khan, Brenny Albuquerque, Adriana van de Guchte, Komal Srivastava, Matthew M. Hernandez, Jayeta Dutta, Denise Jurczynszak, Nancy Francoeur, Betsaida Salom Melo, Irina Oussenko, Gintaras Deikus, Juan Soto, Shwetha Hara Sridhar, Ying-Chih Wang, Kathryn Twyman, Deena R. Altman, Robert Sebra, Adolfo Garcia-Sastre, Marta Luksha, Gopi Patel, Sarah Schaefer, Melissa Gitman, Michael D. Nowak, Alberto Paniz-Mondolli, Emilia Mia Sordillo, Viviana Simon, Harm van Bakel |
| EPI_ISL_1049487                                                                                                                                                                                                                                                                                                                                                                                                                                                                                                                                                                                                                                                                                                                                                                                                                                                                                                                                                                                                                                                                                                                                                                                                     | Alaska State Virology Laboratory                                                                                                                                                        | Alaska State Virology Laboratory                                                                                                                                                        | Stephanie DeRonde, Lisa Smith, Ph.D., Jack Chen, Ph.D.                                                                                                                                                                                                                                                                                                                                                                                                                                                                                                                                                                                                                                                                                                        |
| EPI_ISL_1049594, EPI_ISL_1049615, EPI_ISL_1049622                                                                                                                                                                                                                                                                                                                                                                                                                                                                                                                                                                                                                                                                                                                                                                                                                                                                                                                                                                                                                                                                                                                                                                   | Washington State Department of Health                                                                                                                                                   | Seattle Flu Study                                                                                                                                                                       | Deborah A. Nickerson, Chris D. Frazar, Jover Lee, Benjamin Pelle, Erica Ryke, Matthew Richardson, Amanda Adler, Elisabeth Brandstetter, Peter D. Han, Kairsten Fay, Misja Ilcin, Kirsten Lacombe, Thomas R. Sibley, Melissa Truong, Caitlin R. Wolf, Roshesh Gautom, Geoff Melly, Brian Hiatt, Philip Dykema, Scott Lindquist, Michael Boeckh, Janet A. Englund, Michael Famulare, Barry R. Lutz, Mark J. Rieder, Lea M. Starla, Matthew Thompson, Helen Y. Chu, Jay Shendure, Trevor Bedford                                                                                                                                                                                                                                                                 |
| EPI_ISL_1049979, EPI_ISL_1049981, EPI_ISL_1049982, EPI_ISL_1049984, EPI_ISL_1049986, EPI_ISL_1049987, EPI_ISL_1049988, EPI_ISL_1049989, EPI_ISL_1049990, EPI_ISL_1049991, EPI_ISL_1049992, EPI_ISL_1049993, EPI_ISL_1049997, EPI_ISL_1049998, EPI_ISL_1050000, EPI_ISL_1050001, EPI_ISL_1050002, EPI_ISL_1050003, EPI_ISL_1050004                                                                                                                                                                                                                                                                                                                                                                                                                                                                                                                                                                                                                                                                                                                                                                                                                                                                                   |                                                                                                                                                                                         |                                                                                                                                                                                         |                                                                                                                                                                                                                                                                                                                                                                                                                                                                                                                                                                                                                                                                                                                                                               |
| see above                                                                                                                                                                                                                                                                                                                                                                                                                                                                                                                                                                                                                                                                                                                                                                                                                                                                                                                                                                                                                                                                                                                                                                                                           | Florida Bureau of Public Health Laboratories                                                                                                                                            | Florida Bureau of Public Health Laboratories                                                                                                                                            | Sarah Schmedes, Jason Blanton                                                                                                                                                                                                                                                                                                                                                                                                                                                                                                                                                                                                                                                                                                                                 |



|                                                                                                                                                                                                                                                                                                                                                                                                                                                                                                                                                                                                                                    |                                                                                                                                                                                  |                                                                                                                                |                                                                                                                                                                                                                                                                                                                              |
|------------------------------------------------------------------------------------------------------------------------------------------------------------------------------------------------------------------------------------------------------------------------------------------------------------------------------------------------------------------------------------------------------------------------------------------------------------------------------------------------------------------------------------------------------------------------------------------------------------------------------------|----------------------------------------------------------------------------------------------------------------------------------------------------------------------------------|--------------------------------------------------------------------------------------------------------------------------------|------------------------------------------------------------------------------------------------------------------------------------------------------------------------------------------------------------------------------------------------------------------------------------------------------------------------------|
| see above                                                                                                                                                                                                                                                                                                                                                                                                                                                                                                                                                                                                                          | Centre for Enzyme Innovation, University of Portsmouth / Translational Research Laboratory, Portsmouth Hospitals NHS Trust                                                       | COVID-19 Genomics UK (COG-UK) Consortium                                                                                       | Angela Beckett,Salman Goudarzi,Christopher Fearn,Kate Cook,Katie Loveson,Sharon Glaysher,Scott Elliott,Samuel Robson                                                                                                                                                                                                         |
| EPI_ISL_1054629, EPI_ISL_1054633, EPI_ISL_1054647, EPI_ISL_1054656                                                                                                                                                                                                                                                                                                                                                                                                                                                                                                                                                                 | Virology Department, Sheffield Teaching Hospitals NHS Foundation Trust/Department of Infection, Immunity and Cardiovascular Disease, The Medical School, University of Sheffield | COVID-19 Genomics UK (COG-UK) Consortium                                                                                       | Thushan de Silva, Matthew Parker, Nikki Smith, Adri Agyal, Rebecca Brown, Luke Green, Rachel Tucker, Paul Parsons, Danielle Groves, Katie Johnson, Laura Carriero, Alex Keeley, Dave Partridge, Matthew Wyles, Benjamin Lindsey, Mehmet Yavuz, Mohammad Raza, Cariad Evans                                                   |
| EPI_ISL_1054766, EPI_ISL_1054776, EPI_ISL_1054785, EPI_ISL_1054808, EPI_ISL_1054820                                                                                                                                                                                                                                                                                                                                                                                                                                                                                                                                                | Bioinformatics and Biostatistics Lab, Advanced Sequencing Facility                                                                                                               | COVID-19 Genomics UK (COG-UK) Consortium                                                                                       | Aengus Stewart,Jerome Nicod,Chelsea Sawyer,Laura Cubitt,Harshil Patel,Margaret Crawford                                                                                                                                                                                                                                      |
| EPI_ISL_1055004                                                                                                                                                                                                                                                                                                                                                                                                                                                                                                                                                                                                                    | unknown                                                                                                                                                                          | Instituto Nacional de Saude (INSA)                                                                                             | Borges et al                                                                                                                                                                                                                                                                                                                 |
| EPI_ISL_1055006, EPI_ISL_1055007, EPI_ISL_1055008, EPI_ISL_1055009, EPI_ISL_1055010, EPI_ISL_1055011, EPI_ISL_1055012, EPI_ISL_1055013, EPI_ISL_1055015, EPI_ISL_1055016, EPI_ISL_1055017, EPI_ISL_1055018, EPI_ISL_1055019, EPI_ISL_1055020, EPI_ISL_1055021, EPI_ISL_1055022                                                                                                                                                                                                                                                                                                                                                     | Instituto Nacional de Medicina Genomica                                                                                                                                          | Instituto Nacional de Medicina Genomica                                                                                        | Hidalgo-Miranda A, Mendoza-Vargas A, Reyes-Grajeda JP, Cedro-Tanda A, Alcaraz N, Gonzalez-Barrera D, Rangel-DeLeon D, Ramirez-Vega O, Sifuentes-Rojas C, Cisneros-Villanueva M, Herrera-Montalvo LA                                                                                                                          |
| see above                                                                                                                                                                                                                                                                                                                                                                                                                                                                                                                                                                                                                          | Instituto Nacional de Medicina Genomica                                                                                                                                          | Instituto Nacional de Medicina Genomica                                                                                        | Suppiah J, Kamel K, Mohd Zawawi Z, Ramly MN, Robert F, Thayan R                                                                                                                                                                                                                                                              |
| EPI_ISL_1055037                                                                                                                                                                                                                                                                                                                                                                                                                                                                                                                                                                                                                    | Institute for Medical Research, Infectious Disease Research Centre, National Institutes of Health, Ministry of Health Malaysia                                                   | Institute for Medical Research, Infectious Disease Research Centre, National Institutes of Health, Ministry of Health Malaysia | Suppiah J, Kamel K, Mohd Zawawi Z, Ramly MN, Robert F, Thayan R                                                                                                                                                                                                                                                              |
| EPI_ISL_1055039, EPI_ISL_1055040, EPI_ISL_1055043, EPI_ISL_1055044, EPI_ISL_1055049, EPI_ISL_1055054, EPI_ISL_1055056, EPI_ISL_1055060, EPI_ISL_1055062, EPI_ISL_1055063, EPI_ISL_1055066, EPI_ISL_1055067, EPI_ISL_1055069, EPI_ISL_1055071, EPI_ISL_1055074, EPI_ISL_1055077, EPI_ISL_1055079, EPI_ISL_1055085, EPI_ISL_1055087, EPI_ISL_1055088, EPI_ISL_1055089, EPI_ISL_1055091, EPI_ISL_1055095, EPI_ISL_1055096, EPI_ISL_1055097, EPI_ISL_1055098, EPI_ISL_1055099, EPI_ISL_1055100, EPI_ISL_1055102, EPI_ISL_1055103, EPI_ISL_1055104, EPI_ISL_1055105                                                                     | National Virus Reference Laboratory                                                                                                                                              | National Virus Reference Laboratory                                                                                            |                                                                                                                                                                                                                                                                                                                              |
| see above                                                                                                                                                                                                                                                                                                                                                                                                                                                                                                                                                                                                                          | National Virus Reference Laboratory                                                                                                                                              | National Virus Reference Laboratory                                                                                            | Zoe Yandle, Gabriel Gonzalez, Michael Carr, Jonathan Dean, Cillian F De Gascun                                                                                                                                                                                                                                               |
| EPI_ISL_1055261, EPI_ISL_1055262                                                                                                                                                                                                                                                                                                                                                                                                                                                                                                                                                                                                   | Institute for Medical Research, Infectious Disease Research Centre, National Institutes of Health, Ministry of Health Malaysia                                                   | Institute for Medical Research, Infectious Disease Research Centre, National Institutes of Health, Ministry of Health Malaysia | Suppiah J, Kamel K,Moh Zawawi Z, Ramly N, Robert F, Thayan R                                                                                                                                                                                                                                                                 |
| EPI_ISL_1055264, EPI_ISL_1055361, EPI_ISL_1055362                                                                                                                                                                                                                                                                                                                                                                                                                                                                                                                                                                                  | Institute for Medical Research, Infectious Disease Research Centre, National Institutes of Health, Ministry of Health Malaysia                                                   | Institute for Medical Research, Infectious Disease Research Centre, National Institutes of Health, Ministry of Health Malaysia | Suppiah J, Kamel K, Mohd Zawawi Z, Ramly N, Robert F, Thayan R                                                                                                                                                                                                                                                               |
| EPI_ISL_1055810                                                                                                                                                                                                                                                                                                                                                                                                                                                                                                                                                                                                                    | National Virus Reference Laboratory                                                                                                                                              | National Virus Reference Laboratory                                                                                            | Zoe Yandle, Gabriel Gonzalez, Michael Carr, Jonathan Dean, Cillian F De Gascun                                                                                                                                                                                                                                               |
| EPI_ISL_1056602, EPI_ISL_1056604, EPI_ISL_1056605, EPI_ISL_1056607, EPI_ISL_1056608, EPI_ISL_1056609, EPI_ISL_1056611, EPI_ISL_1056612, EPI_ISL_1056614, EPI_ISL_1056617, EPI_ISL_1056618, EPI_ISL_1056620, EPI_ISL_1056621, EPI_ISL_1056622, EPI_ISL_1056623, EPI_ISL_1056628, EPI_ISL_1056631, EPI_ISL_1056634, EPI_ISL_1056635, EPI_ISL_1056638, EPI_ISL_1056639, EPI_ISL_1056640, EPI_ISL_1056642, EPI_ISL_1056643, EPI_ISL_1056644, EPI_ISL_1056648                                                                                                                                                                           | Servicio de Microbiología, Hospital Universitario Son Espases                                                                                                                    | SeqCOVID-SPAIN consortium/IBV(CSIC)                                                                                            | Carla López-Causapé, Jordi Reina, Antonio Oliver and SeqCOVID-SPAIN consortium                                                                                                                                                                                                                                               |
| see above                                                                                                                                                                                                                                                                                                                                                                                                                                                                                                                                                                                                                          | Servicio de Microbiología, Hospital Universitario Son Espases                                                                                                                    | SeqCOVID-SPAIN consortium/IBV(CSIC)                                                                                            | Carla López-Causapé, Jordi Reina, Antonio Oliver and SeqCOVID-SPAIN consortium                                                                                                                                                                                                                                               |
| EPI_ISL_1056976, EPI_ISL_1056977, EPI_ISL_1056978, EPI_ISL_1056979, EPI_ISL_1056980, EPI_ISL_1056981, EPI_ISL_1056982, EPI_ISL_1056983, EPI_ISL_1056984, EPI_ISL_1056985, EPI_ISL_1056995, EPI_ISL_1056997, EPI_ISL_1056998, EPI_ISL_1056999, EPI_ISL_1057000, EPI_ISL_1057001, EPI_ISL_1057002, EPI_ISL_1057003, EPI_ISL_1057004, EPI_ISL_1057005, EPI_ISL_1057006, EPI_ISL_1057007, EPI_ISL_1057008, EPI_ISL_1057012, EPI_ISL_1057017, EPI_ISL_1057020, EPI_ISL_1057021, EPI_ISL_1057022, EPI_ISL_1057023, EPI_ISL_1057024, EPI_ISL_1057026, EPI_ISL_1057027, EPI_ISL_1057028, EPI_ISL_1057029, EPI_ISL_1057030, EPI_ISL_1057032 | KU Leuven, Rega Institute, Clinical and Epidemiological Virology                                                                                                                 | KU Leuven, Rega Institute, Clinical and Epidemiological Virology                                                               | Tony Wawina-Bokalanga, Bert Vanmechelen, Joan Marti-Carreras, Piet Maes                                                                                                                                                                                                                                                      |
| see above                                                                                                                                                                                                                                                                                                                                                                                                                                                                                                                                                                                                                          | KU Leuven, Rega Institute, Clinical and Epidemiological Virology                                                                                                                 | KU Leuven, Rega Institute, Clinical and Epidemiological Virology                                                               | Tony Wawina-Bokalanga, Bert Vanmechelen, Joan Marti-Carreras, Piet Maes                                                                                                                                                                                                                                                      |
| EPI_ISL_1057039                                                                                                                                                                                                                                                                                                                                                                                                                                                                                                                                                                                                                    | Hospital Universitari Arnau de Vilanova                                                                                                                                          | Hospital Universitari Vall d'Hebron - Vall d'Hebron Research Institute                                                         | Cristina Andrés, Maria Piñana, Josep F Abril, Damir Garcia-Cehic, Ariadna Rando, Juliana Esperalba, Maria Gema Codina, Carla Castillo, Maria Carmen Martín, Tomás Pumarola, Josep Quer, Andrés Antón                                                                                                                         |
| EPI_ISL_1057043, EPI_ISL_1057045, EPI_ISL_1057046, EPI_ISL_1057048, EPI_ISL_1057049, EPI_ISL_1057050, EPI_ISL_1057051, EPI_ISL_1057052, EPI_ISL_1057053, EPI_ISL_1057054, EPI_ISL_1057055, EPI_ISL_1057056, EPI_ISL_1057057, EPI_ISL_1057058, EPI_ISL_1057059, EPI_ISL_1057060, EPI_ISL_1057061, EPI_ISL_1057063, EPI_ISL_1057064, EPI_ISL_1057076, EPI_ISL_1057078, EPI_ISL_1057079, EPI_ISL_1057080, EPI_ISL_1057081, EPI_ISL_1057082, EPI_ISL_1057083, EPI_ISL_1057084, EPI_ISL_1057085, EPI_ISL_1057086, EPI_ISL_1057088, EPI_ISL_1057089, EPI_ISL_1057091, EPI_ISL_1057092, EPI_ISL_1057093, EPI_ISL_1057094, EPI_ISL_1057095 | KU Leuven, Rega Institute, Clinical and Epidemiological Virology                                                                                                                 | KU Leuven, Rega Institute, Clinical and Epidemiological Virology                                                               | Tony Wawina-Bokalanga, Bert Vanmechelen, Joan Marti-Carreras, Piet Maes                                                                                                                                                                                                                                                      |
| see above                                                                                                                                                                                                                                                                                                                                                                                                                                                                                                                                                                                                                          | KU Leuven, Rega Institute, Clinical and Epidemiological Virology                                                                                                                 | KU Leuven, Rega Institute, Clinical and Epidemiological Virology                                                               | Tony Wawina-Bokalanga, Bert Vanmechelen, Joan Marti-Carreras, Piet Maes                                                                                                                                                                                                                                                      |
| EPI_ISL_1057107, EPI_ISL_1057108, EPI_ISL_1057109, EPI_ISL_1057110, EPI_ISL_1057112, EPI_ISL_1057113, EPI_ISL_1057114, EPI_ISL_1057116, EPI_ISL_1057117, EPI_ISL_1057118, EPI_ISL_1057119, EPI_ISL_1057120                                                                                                                                                                                                                                                                                                                                                                                                                         | Lighthouse Lab in Milton Keynes                                                                                                                                                  | Wellcome Sanger Institute for the COVID-19 Genomics UK (COG-UK) Consortium                                                     | The Lighthouse Lab in Milton Keynes and Alex Alderton, Roberto Amato, Jeffrey Barrett, Sonia Goncalves, Ewan Harrison, David K. Jackson, Ian Johnston, Dominic Kwiatkowski, Cordelia Langford, John Sillitoe on behalf of the Wellcome Sanger Institute COVID-19 Surveillance Team                                           |
| see above                                                                                                                                                                                                                                                                                                                                                                                                                                                                                                                                                                                                                          | Lighthouse Lab in Milton Keynes                                                                                                                                                  | Wellcome Sanger Institute for the COVID-19 Genomics UK (COG-UK) Consortium                                                     | The Lighthouse Lab in Milton Keynes and Alex Alderton, Roberto Amato, Jeffrey Barrett, Sonia Goncalves, Ewan Harrison, David K. Jackson, Ian Johnston, Dominic Kwiatkowski, Cordelia Langford, John Sillitoe on behalf of the Wellcome Sanger Institute COVID-19 Surveillance Team                                           |
| EPI_ISL_1057121, EPI_ISL_1057122                                                                                                                                                                                                                                                                                                                                                                                                                                                                                                                                                                                                   | Lighthouse Lab in Glasgow                                                                                                                                                        | Wellcome Sanger Institute for the COVID-19 Genomics UK (COG-UK) Consortium                                                     | Harper VanSteenhouse, Yumi Kasai, David Gray, Carol Clugston, Anna Dominiczak and Alex Alderton, Roberto Amato, Jeffrey Barrett, Sonia Goncalves, Ewan Harrison, David K. Jackson, Ian Johnston, Dominic Kwiatkowski, Cordelia Langford, John Sillitoe on behalf of the Wellcome Sanger Institute COVID-19 Surveillance Team |
| EPI_ISL_1057123, EPI_ISL_1057126                                                                                                                                                                                                                                                                                                                                                                                                                                                                                                                                                                                                   | Lighthouse Lab in Milton Keynes                                                                                                                                                  | Wellcome Sanger Institute for the COVID-19 Genomics UK (COG-UK) Consortium                                                     | The Lighthouse Lab in Milton Keynes and Alex Alderton, Roberto Amato, Jeffrey Barrett, Sonia Goncalves, Ewan Harrison, David K. Jackson, Ian Johnston, Dominic Kwiatkowski, Cordelia Langford, John Sillitoe on behalf of the Wellcome Sanger Institute COVID-19 Surveillance Team                                           |
| EPI_ISL_1057127, EPI_ISL_1057128                                                                                                                                                                                                                                                                                                                                                                                                                                                                                                                                                                                                   | Lighthouse Lab in Glasgow                                                                                                                                                        | Wellcome Sanger Institute for the COVID-19 Genomics UK (COG-UK) Consortium                                                     | Harper VanSteenhouse, Yumi Kasai, David Gray, Carol Clugston, Anna Dominiczak and Alex Alderton, Roberto Amato, Jeffrey Barrett, Sonia Goncalves, Ewan Harrison, David K. Jackson, Ian Johnston, Dominic Kwiatkowski, Cordelia Langford, John Sillitoe on behalf of the Wellcome Sanger Institute COVID-19 Surveillance Team |
| EPI_ISL_1057129, EPI_ISL_1057132, EPI_ISL_1057133, EPI_ISL_1057134                                                                                                                                                                                                                                                                                                                                                                                                                                                                                                                                                                 | Lighthouse Lab in Milton Keynes                                                                                                                                                  | Wellcome Sanger Institute for the COVID-19 Genomics UK (COG-UK) Consortium                                                     | The Lighthouse Lab in Milton Keynes and Alex Alderton, Roberto Amato, Jeffrey Barrett, Sonia Goncalves, Ewan Harrison, David K. Jackson, Ian Johnston, Dominic Kwiatkowski, Cordelia Langford, John Sillitoe on behalf of the Wellcome Sanger Institute COVID-19 Surveillance Team                                           |
| EPI_ISL_1057136                                                                                                                                                                                                                                                                                                                                                                                                                                                                                                                                                                                                                    | Lighthouse Lab in Glasgow                                                                                                                                                        | Wellcome Sanger Institute for the COVID-19 Genomics UK (COG-UK) Consortium                                                     | Harper VanSteenhouse, Yumi Kasai, David Gray, Carol Clugston, Anna Dominiczak and Alex Alderton, Roberto Amato, Jeffrey Barrett, Sonia Goncalves, Ewan Harrison, David K. Jackson, Ian Johnston, Dominic Kwiatkowski, Cordelia Langford, John Sillitoe on behalf of the Wellcome Sanger Institute COVID-19 Surveillance Team |
| EPI_ISL_1057137, EPI_ISL_1057139                                                                                                                                                                                                                                                                                                                                                                                                                                                                                                                                                                                                   | Lighthouse Lab in Milton Keynes                                                                                                                                                  | Wellcome Sanger Institute for the COVID-19 Genomics UK (COG-UK) Consortium                                                     | The Lighthouse Lab in Milton Keynes and Alex Alderton, Roberto Amato, Jeffrey Barrett, Sonia Goncalves, Ewan Harrison, David K. Jackson, Ian Johnston, Dominic Kwiatkowski, Cordelia Langford, John Sillitoe on behalf of the Wellcome Sanger Institute COVID-19 Surveillance Team                                           |
| EPI_ISL_1057141                                                                                                                                                                                                                                                                                                                                                                                                                                                                                                                                                                                                                    | Lighthouse Lab in Glasgow                                                                                                                                                        | Wellcome Sanger Institute for the COVID-19 Genomics UK (COG-UK) Consortium                                                     | Harper VanSteenhouse, Yumi Kasai, David Gray, Carol Clugston, Anna Dominiczak and Alex Alderton, Roberto Amato, Jeffrey Barrett, Sonia Goncalves, Ewan Harrison, David K. Jackson, Ian Johnston, Dominic Kwiatkowski, Cordelia Langford, John Sillitoe on behalf of the Wellcome Sanger Institute COVID-19 Surveillance Team |
| EPI_ISL_1057143, EPI_ISL_1057144, EPI_ISL_1057145, EPI_ISL_1057149, EPI_ISL_1057151                                                                                                                                                                                                                                                                                                                                                                                                                                                                                                                                                | Lighthouse Lab in Milton Keynes                                                                                                                                                  | Wellcome Sanger Institute for the COVID-19 Genomics UK (COG-UK) Consortium                                                     | The Lighthouse Lab in Milton Keynes and Alex Alderton, Roberto Amato, Jeffrey Barrett, Sonia Goncalves, Ewan Harrison, David K. Jackson, Ian Johnston, Dominic Kwiatkowski, Cordelia Langford, John Sillitoe on behalf of the Wellcome Sanger Institute COVID-19 Surveillance Team                                           |
| EPI_ISL_1057152                                                                                                                                                                                                                                                                                                                                                                                                                                                                                                                                                                                                                    | Lighthouse Lab in Glasgow                                                                                                                                                        | Wellcome Sanger Institute for the COVID-19 Genomics UK (COG-UK) Consortium                                                     | Harper VanSteenhouse, Yumi Kasai, David Gray, Carol Clugston, Anna Dominiczak and Alex Alderton, Roberto Amato, Jeffrey Barrett, Sonia Goncalves, Ewan Harrison, David K. Jackson, Ian Johnston, Dominic Kwiatkowski, Cordelia Langford, John Sillitoe on behalf of the Wellcome Sanger Institute COVID-19 Surveillance Team |
| EPI_ISL_1057153, EPI_ISL_1057156, EPI_ISL_1057157                                                                                                                                                                                                                                                                                                                                                                                                                                                                                                                                                                                  | Lighthouse Lab in Milton Keynes                                                                                                                                                  | Wellcome Sanger Institute for the COVID-19 Genomics UK (COG-UK) Consortium                                                     | The Lighthouse Lab in Milton Keynes and Alex Alderton, Roberto Amato, Jeffrey Barrett, Sonia Goncalves, Ewan Harrison, David K. Jackson, Ian Johnston, Dominic Kwiatkowski, Cordelia Langford, John Sillitoe on behalf of the Wellcome Sanger Institute COVID-19 Surveillance Team                                           |
| EPI_ISL_1057158                                                                                                                                                                                                                                                                                                                                                                                                                                                                                                                                                                                                                    | Lighthouse Lab in Glasgow                                                                                                                                                        | Wellcome Sanger Institute for the COVID-19 Genomics UK                                                                         | Harper VanSteenhouse, Yumi Kasai, David Gray, Carol Clugston, Anna Dominiczak and Alex Alderton, Roberto Amato, Jeffrey Barrett, Sonia Goncalves,                                                                                                                                                                            |



[illegible]



[illegible]

[illegible]











[illegible]

[illegible]

[illegible]

[illegible]

[illegible]

[illegible]

[illegible]

[illegible]



[illegible]

[illegible]

|                                                                                                                                                                                                                                                                                                                                                                                                                                                                                                                                                                                                                                                                      |                                                                                                                                                   |                                                                                                                                        |                                                                                                                                                                                                                                                                                                                              |
|----------------------------------------------------------------------------------------------------------------------------------------------------------------------------------------------------------------------------------------------------------------------------------------------------------------------------------------------------------------------------------------------------------------------------------------------------------------------------------------------------------------------------------------------------------------------------------------------------------------------------------------------------------------------|---------------------------------------------------------------------------------------------------------------------------------------------------|----------------------------------------------------------------------------------------------------------------------------------------|------------------------------------------------------------------------------------------------------------------------------------------------------------------------------------------------------------------------------------------------------------------------------------------------------------------------------|
| see above                                                                                                                                                                                                                                                                                                                                                                                                                                                                                                                                                                                                                                                            | Lighthouse Lab in Glasgow                                                                                                                         | Wellcome Sanger Institute for the COVID-19 Genomics UK (COG-UK) Consortium                                                             | Harper VanSteenhouse, Yumi Kasai, David Gray, Carol Clugston, Anna Dominiczak and Alex Alderton, Roberto Amato, Jeffrey Barrett, Sonia Goncalves, Ewan Harrison, David K. Jackson, Ian Johnston, Dominic Kwiatkowski, Cordelia Langford, John Sillitoe on behalf of the Wellcome Sanger Institute COVID-19 Surveillance Team |
| EPI_ISL_1063386, EPI_ISL_1063388                                                                                                                                                                                                                                                                                                                                                                                                                                                                                                                                                                                                                                     | Randox Laboratories                                                                                                                               | Wellcome Sanger Institute for the COVID-19 Genomics UK (COG-UK) Consortium                                                             | Randox Laboratories and Alex Alderton, Roberto Amato, Jeffrey Barrett, Sonia Goncalves, Ewan Harrison, David K. Jackson, Ian Johnston, Dominic Kwiatkowski, Cordelia Langford, John Sillitoe on behalf of the Wellcome Sanger Institute COVID-19 Surveillance Team                                                           |
| EPI_ISL_1063389                                                                                                                                                                                                                                                                                                                                                                                                                                                                                                                                                                                                                                                      | Lighthouse Lab in Glasgow                                                                                                                         | Wellcome Sanger Institute for the COVID-19 Genomics UK (COG-UK) Consortium                                                             | Harper VanSteenhouse, Yumi Kasai, David Gray, Carol Clugston, Anna Dominiczak and Alex Alderton, Roberto Amato, Jeffrey Barrett, Sonia Goncalves, Ewan Harrison, David K. Jackson, Ian Johnston, Dominic Kwiatkowski, Cordelia Langford, John Sillitoe on behalf of the Wellcome Sanger Institute COVID-19 Surveillance Team |
| EPI_ISL_1063390                                                                                                                                                                                                                                                                                                                                                                                                                                                                                                                                                                                                                                                      | Randox Laboratories                                                                                                                               | Wellcome Sanger Institute for the COVID-19 Genomics UK (COG-UK) Consortium                                                             | Randox Laboratories and Alex Alderton, Roberto Amato, Jeffrey Barrett, Sonia Goncalves, Ewan Harrison, David K. Jackson, Ian Johnston, Dominic Kwiatkowski, Cordelia Langford, John Sillitoe on behalf of the Wellcome Sanger Institute COVID-19 Surveillance Team                                                           |
| EPI_ISL_1063392, EPI_ISL_1063393                                                                                                                                                                                                                                                                                                                                                                                                                                                                                                                                                                                                                                     | Lighthouse Lab in Glasgow                                                                                                                         | Wellcome Sanger Institute for the COVID-19 Genomics UK (COG-UK) Consortium                                                             | Harper VanSteenhouse, Yumi Kasai, David Gray, Carol Clugston, Anna Dominiczak and Alex Alderton, Roberto Amato, Jeffrey Barrett, Sonia Goncalves, Ewan Harrison, David K. Jackson, Ian Johnston, Dominic Kwiatkowski, Cordelia Langford, John Sillitoe on behalf of the Wellcome Sanger Institute COVID-19 Surveillance Team |
| EPI_ISL_1063395, EPI_ISL_1063397                                                                                                                                                                                                                                                                                                                                                                                                                                                                                                                                                                                                                                     | Randox Laboratories                                                                                                                               | Wellcome Sanger Institute for the COVID-19 Genomics UK (COG-UK) Consortium                                                             | Randox Laboratories and Alex Alderton, Roberto Amato, Jeffrey Barrett, Sonia Goncalves, Ewan Harrison, David K. Jackson, Ian Johnston, Dominic Kwiatkowski, Cordelia Langford, John Sillitoe on behalf of the Wellcome Sanger Institute COVID-19 Surveillance Team                                                           |
| EPI_ISL_1063407, EPI_ISL_1063418, EPI_ISL_1063430, EPI_ISL_1063439, EPI_ISL_1063444, EPI_ISL_1063448, EPI_ISL_1063450, EPI_ISL_1063451, EPI_ISL_1063455, EPI_ISL_1063457, EPI_ISL_1063458, EPI_ISL_1063459, EPI_ISL_1063462, EPI_ISL_1063463, EPI_ISL_1063466, EPI_ISL_1063468, EPI_ISL_1063469, EPI_ISL_1063473, EPI_ISL_1063477, EPI_ISL_1063479, EPI_ISL_1063486                                                                                                                                                                                                                                                                                                  |                                                                                                                                                   |                                                                                                                                        |                                                                                                                                                                                                                                                                                                                              |
| see above                                                                                                                                                                                                                                                                                                                                                                                                                                                                                                                                                                                                                                                            | Azienda Sanitaria dell'Alto Adige Laboratorio Aziendale di Microbiologia e Virologia                                                              | Istituto di Genomica Applicata                                                                                                         | Elisabetta Pagani, Irene Bianconi, Elisabetta Giacobazzi, Elisa Masi, Stefanie Wieser, Irena Jurman, Vera Vendramin, Gabriele Magris, Eleonora Paparelli, Davide Scaglione, Michele Morgante                                                                                                                                 |
| EPI_ISL_1063735, EPI_ISL_1063741, EPI_ISL_1063761, EPI_ISL_1063765, EPI_ISL_1063766, EPI_ISL_1063768, EPI_ISL_1063771, EPI_ISL_1063772                                                                                                                                                                                                                                                                                                                                                                                                                                                                                                                               | Division of Emerging Infectious Diseases, Bureau of Infectious Diseases Diagnosis Control, Korea Disease Control and Prevention Agency            | Division of Emerging Infectious Diseases, Bureau of Infectious Diseases Diagnosis Control, Korea Disease Control and Prevention Agency | Ae Kyung Park, Il-Hwan Kim, Heui Man Kim, Jeong-Min Kim, Namjoo Lee, Chaeyoung Lee, Sang Hee Woo, Eun-Jin Kim                                                                                                                                                                                                                |
| EPI_ISL_1063791                                                                                                                                                                                                                                                                                                                                                                                                                                                                                                                                                                                                                                                      | Hospital Universitari Arnau de Vilanova                                                                                                           | Hospital Universitari Vall d'Hebron                                                                                                    | Cristina Andrés, María Piñana, Josep F Abril, Damir Garcia-Cehic, Ariadna Rando, Juliana Esperalba, María Gema Codina, Carla Castillo, María Carmen Martín, Tomás Pumarola, Josep Quer, Andrés Antón                                                                                                                         |
| EPI_ISL_1063911                                                                                                                                                                                                                                                                                                                                                                                                                                                                                                                                                                                                                                                      | INMI Lazzaro Spallanzani IRCCS                                                                                                                    | INMI Lazzaro Spallanzani IRCCS                                                                                                         | E Giombini, M. Rueca, B Bartolini, O Butera, CEM Gruber, F Messina, A Di Caro, MR Capobianchi                                                                                                                                                                                                                                |
| EPI_ISL_1063912                                                                                                                                                                                                                                                                                                                                                                                                                                                                                                                                                                                                                                                      | Laboratorio Biologia Molecolare Sars Cov2 - UOC Laboratorio Analisi - Servizio Medicina di Laboratorio, Ospedale "San Francesco" - ATS-ASSL Nuoro | Laboratorio specialistico UOC Ematologia - Ospedale "San Francesco" - ATS-ASSL Nuoro                                                   | Piras Giovanna, Asproni Rosanna, Malune Paolo, Fiamma Maura, Monne Maria Itria, Palmas Angelo Domenico, Lo Maglio Iana, Mamelì Giuseppe                                                                                                                                                                                      |
| EPI_ISL_1063990, EPI_ISL_1063991, EPI_ISL_1063992                                                                                                                                                                                                                                                                                                                                                                                                                                                                                                                                                                                                                    | Ministry of Health Turkey                                                                                                                         | Ministry of Health Turkey                                                                                                              | Fatma Bayrakdar, Yasemin Cogun, Süleyman Yalcin, Aye Baak Alta, Gülay Korukluolu                                                                                                                                                                                                                                             |
| EPI_ISL_1064001                                                                                                                                                                                                                                                                                                                                                                                                                                                                                                                                                                                                                                                      | Hospital Universitari Vall d'Hebron - Vall d'Hebron Institut de Recerca                                                                           | Hospital Universitari Vall d'Hebron                                                                                                    | Cristina Andrés, María Piñana, Josep F Abril, Damir Garcia-Cehic, Ariadna Rando, Juliana Esperalba, María Gema Codina, Carla Castillo, María Carmen Martín, Tomás Pumarola, Josep Quer, Andrés Antón                                                                                                                         |
| EPI_ISL_1064278                                                                                                                                                                                                                                                                                                                                                                                                                                                                                                                                                                                                                                                      | University of Wisconsin-Madison AIDS Vaccine Research Laboratories                                                                                | University of Wisconsin-Madison AIDS Vaccine Research Laboratories                                                                     | Gage Moreno, Katarina Braun, et al. AIDS Vaccine Research Laboratories                                                                                                                                                                                                                                                       |
| EPI_ISL_1064333, EPI_ISL_1064334, EPI_ISL_1064335, EPI_ISL_1064336, EPI_ISL_1064337, EPI_ISL_1064338, EPI_ISL_1064339, EPI_ISL_1064340, EPI_ISL_1064359, EPI_ISL_1064360, EPI_ISL_1064361, EPI_ISL_1064362, EPI_ISL_1064363, EPI_ISL_1064364, EPI_ISL_1064365, EPI_ISL_1064369                                                                                                                                                                                                                                                                                                                                                                                       |                                                                                                                                                   |                                                                                                                                        |                                                                                                                                                                                                                                                                                                                              |
| see above                                                                                                                                                                                                                                                                                                                                                                                                                                                                                                                                                                                                                                                            | Maryland Public Health Laboratory                                                                                                                 | Maryland Public Health Laboratory                                                                                                      | Maryland Department of Health Laboratories Administration                                                                                                                                                                                                                                                                    |
| EPI_ISL_1064403                                                                                                                                                                                                                                                                                                                                                                                                                                                                                                                                                                                                                                                      | M Health Fairview                                                                                                                                 | Minnesota Department of Health, Public Health Laboratory                                                                               | Alexandra Lorentz, Jacob Garfin, Matt Plumb, and Xiong Wang                                                                                                                                                                                                                                                                  |
| EPI_ISL_1064423, EPI_ISL_1064424, EPI_ISL_1064425, EPI_ISL_1064426, EPI_ISL_1064427, EPI_ISL_1064430, EPI_ISL_1064431, EPI_ISL_1064432, EPI_ISL_1064433, EPI_ISL_1064434, EPI_ISL_1064435, EPI_ISL_1064436, EPI_ISL_1064437, EPI_ISL_1064440, EPI_ISL_1064441, EPI_ISL_1064442, EPI_ISL_1064443, EPI_ISL_1064444, EPI_ISL_1064445, EPI_ISL_1064446, EPI_ISL_1064447, EPI_ISL_1064450, EPI_ISL_1064456, EPI_ISL_1064459, EPI_ISL_1064460, EPI_ISL_1064461, EPI_ISL_1064462, EPI_ISL_1064463, EPI_ISL_1064464, EPI_ISL_1064466, EPI_ISL_1064471, EPI_ISL_1064472, EPI_ISL_1064473, EPI_ISL_1064474, EPI_ISL_1064476, EPI_ISL_1064479, EPI_ISL_1064480, EPI_ISL_1064481 |                                                                                                                                                   |                                                                                                                                        |                                                                                                                                                                                                                                                                                                                              |
| see above                                                                                                                                                                                                                                                                                                                                                                                                                                                                                                                                                                                                                                                            | KU Leuven, Rega Institute, Clinical and Epidemiological Virology                                                                                  | KU Leuven, Rega Institute, Clinical and Epidemiological Virology                                                                       | Tony Wawina-Bokalanga, Bert Vanmechelen, Joan Marti-Carerras, Piet Maes                                                                                                                                                                                                                                                      |
| EPI_ISL_1064550                                                                                                                                                                                                                                                                                                                                                                                                                                                                                                                                                                                                                                                      | Unilabs AB, Klinisk mikrobiologi,                                                                                                                 | The Public Health Agency of Sweden                                                                                                     | Oskar Karlsson Lindsjo, Maria Lind Karlberg, Carlo Berg, Anna-Malin Linde, Sofia Stamouli, Samuel Ohman, Reza Advani, Mattias Haukland, Petra Holmstrom, Noura Walai, Petra Edquist, Mia Brytting, Anna Risberg, Karin Tegmark-Wisell                                                                                        |
| EPI_ISL_1064583, EPI_ISL_1064584, EPI_ISL_1064587, EPI_ISL_1064588                                                                                                                                                                                                                                                                                                                                                                                                                                                                                                                                                                                                   | Klinisk Mikrobiologi                                                                                                                              | The Public Health Agency of Sweden                                                                                                     | Oskar Karlsson Lindsjo, Maria Lind Karlberg, Carlo Berg, Anna-Malin Linde, Sofia Stamouli, Samuel Ohman, Reza Advani, Mattias Haukland, Petra Holmstrom, Noura Walai, Petra Edquist, Mia Brytting, Anna Risberg, Karin Tegmark-Wisell                                                                                        |
| EPI_ISL_1064594, EPI_ISL_1064595, EPI_ISL_1064596, EPI_ISL_1064597, EPI_ISL_1064598, EPI_ISL_1064599, EPI_ISL_1064600, EPI_ISL_1064601, EPI_ISL_1064602, EPI_ISL_1064603, EPI_ISL_1064604, EPI_ISL_1064605, EPI_ISL_1064606                                                                                                                                                                                                                                                                                                                                                                                                                                          |                                                                                                                                                   |                                                                                                                                        |                                                                                                                                                                                                                                                                                                                              |
| see above                                                                                                                                                                                                                                                                                                                                                                                                                                                                                                                                                                                                                                                            | Klinisk mikrobiologi                                                                                                                              | The Public Health Agency of Sweden                                                                                                     | Oskar Karlsson Lindsjo, Maria Lind Karlberg, Carlo Berg, Anna-Malin Linde, Sofia Stamouli, Samuel Ohman, Reza Advani, Mattias Haukland, Petra Holmstrom, Noura Walai, Petra Edquist, Mia Brytting, Anna Risberg, Karin Tegmark-Wisell                                                                                        |
| EPI_ISL_1064610                                                                                                                                                                                                                                                                                                                                                                                                                                                                                                                                                                                                                                                      | NPC                                                                                                                                               | The Public Health Agency of Sweden                                                                                                     | Oskar Karlsson Lindsjo, Maria Lind Karlberg, Carlo Berg, Anna-Malin Linde, Sofia Stamouli, Samuel Ohman, Reza Advani, Mattias Haukland, Petra Holmstrom, Noura Walai, Petra Edquist, Mia Brytting, Anna Risberg, Karin Tegmark-Wisell                                                                                        |
| EPI_ISL_1064625                                                                                                                                                                                                                                                                                                                                                                                                                                                                                                                                                                                                                                                      | Klinisk Mikrobiologi                                                                                                                              | The Public Health Agency of Sweden                                                                                                     | Oskar Karlsson Lindsjo, Maria Lind Karlberg, Carlo Berg, Anna-Malin Linde, Sofia Stamouli, Samuel Ohman, Reza Advani, Mattias Haukland, Petra Holmstrom, Noura Walai, Petra Edquist, Mia Brytting, Anna Risberg, Karin Tegmark-Wisell                                                                                        |
| EPI_ISL_1064630, EPI_ISL_1064631, EPI_ISL_1064632, EPI_ISL_1064644, EPI_ISL_1064645, EPI_ISL_1064646, EPI_ISL_1064647, EPI_ISL_1064648, EPI_ISL_1064650, EPI_ISL_1064651, EPI_ISL_1064653, EPI_ISL_1064654, EPI_ISL_1064661, EPI_ISL_1064662, EPI_ISL_1064664, EPI_ISL_1064666, EPI_ISL_1064667, EPI_ISL_1064668, EPI_ISL_1064669, EPI_ISL_1064670, EPI_ISL_1064671, EPI_ISL_1064672, EPI_ISL_1064674, EPI_ISL_1064676, EPI_ISL_1064679, EPI_ISL_1064681                                                                                                                                                                                                             |                                                                                                                                                   |                                                                                                                                        |                                                                                                                                                                                                                                                                                                                              |
| see above                                                                                                                                                                                                                                                                                                                                                                                                                                                                                                                                                                                                                                                            | Klinisk mikrobiologi                                                                                                                              | The Public Health Agency of Sweden                                                                                                     | Oskar Karlsson Lindsjo, Maria Lind Karlberg, Carlo Berg, Anna-Malin Linde, Sofia Stamouli, Samuel Ohman, Reza Advani, Mattias Haukland, Petra Holmstrom, Noura Walai, Petra Edquist, Mia Brytting, Anna Risberg, Karin Tegmark-Wisell                                                                                        |
| EPI_ISL_1064685, EPI_ISL_1064686, EPI_ISL_1064687, EPI_ISL_1064688, EPI_ISL_1064690                                                                                                                                                                                                                                                                                                                                                                                                                                                                                                                                                                                  | Unilabs Laboratoriemedicin                                                                                                                        | The Public Health Agency of Sweden                                                                                                     | Oskar Karlsson Lindsjo, Maria Lind Karlberg, Carlo Berg, Anna-Malin Linde, Sofia Stamouli, Samuel Ohman, Reza Advani, Mattias Haukland, Petra Holmstrom, Noura Walai, Petra Edquist, Mia Brytting, Anna Risberg, Karin Tegmark-Wisell                                                                                        |
| EPI_ISL_1064696                                                                                                                                                                                                                                                                                                                                                                                                                                                                                                                                                                                                                                                      | Klinisk mikrobiologi                                                                                                                              | The Public Health Agency of Sweden                                                                                                     | Oskar Karlsson Lindsjo, Maria Lind Karlberg, Carlo Berg, Anna-Malin Linde, Sofia Stamouli, Samuel Ohman, Reza Advani, Mattias Haukland, Petra Holmstrom, Noura Walai, Petra Edquist, Mia Brytting, Anna Risberg, Karin Tegmark-Wisell                                                                                        |
| EPI_ISL_1064699                                                                                                                                                                                                                                                                                                                                                                                                                                                                                                                                                                                                                                                      | Klinisk Mikrobiologi                                                                                                                              | The Public Health Agency of Sweden                                                                                                     | Oskar Karlsson Lindsjo, Maria Lind Karlberg, Carlo Berg, Anna-Malin Linde, Sofia Stamouli, Samuel Ohman, Reza Advani, Mattias Haukland, Petra Holmstrom, Noura Walai, Petra Edquist, Mia Brytting, Anna Risberg, Karin Tegmark-Wisell                                                                                        |
| EPI_ISL_1064701, EPI_ISL_1064702                                                                                                                                                                                                                                                                                                                                                                                                                                                                                                                                                                                                                                     | Mikrobiologen                                                                                                                                     | The Public Health Agency of Sweden                                                                                                     | Oskar Karlsson Lindsjo, Maria Lind Karlberg, Carlo Berg, Anna-Malin Linde, Sofia Stamouli, Samuel Ohman, Reza Advani, Mattias Haukland, Petra Holmstrom, Noura Walai, Petra Edquist, Mia Brytting, Anna Risberg, Karin Tegmark-Wisell                                                                                        |
| EPI_ISL_1064703, EPI_ISL_1064704                                                                                                                                                                                                                                                                                                                                                                                                                                                                                                                                                                                                                                     | Klinisk mikrobiologi                                                                                                                              | The Public Health Agency of Sweden                                                                                                     | Oskar Karlsson Lindsjo, Maria Lind Karlberg, Carlo Berg, Anna-Malin Linde, Sofia Stamouli, Samuel Ohman, Reza Advani, Mattias Haukland, Petra Holmstrom, Noura Walai, Petra Edquist, Mia Brytting, Anna Risberg, Karin Tegmark-Wisell                                                                                        |
| EPI_ISL_1064708                                                                                                                                                                                                                                                                                                                                                                                                                                                                                                                                                                                                                                                      | The Public Health Agency of Sweden                                                                                                                | The Public Health Agency of Sweden                                                                                                     | Oskar Karlsson Lindsjo, Maria Lind Karlberg, Carlo Berg, Anna-Malin Linde, Sofia Stamouli, Samuel Ohman, Reza Advani, Mattias Haukland, Petra Holmstrom, Noura Walai, Petra Edquist, Mia Brytting, Anna Risberg, Karin Tegmark-Wisell                                                                                        |

|                                                                                                                                                                                                                                                                                                                                                                                                                                                                                                                                                                                                                                                                                                                                                                                                                                                                                                    |                                         |                                                                           |                                                                                                                                                                                                                                       |
|----------------------------------------------------------------------------------------------------------------------------------------------------------------------------------------------------------------------------------------------------------------------------------------------------------------------------------------------------------------------------------------------------------------------------------------------------------------------------------------------------------------------------------------------------------------------------------------------------------------------------------------------------------------------------------------------------------------------------------------------------------------------------------------------------------------------------------------------------------------------------------------------------|-----------------------------------------|---------------------------------------------------------------------------|---------------------------------------------------------------------------------------------------------------------------------------------------------------------------------------------------------------------------------------|
| EPI_ISL_1064710                                                                                                                                                                                                                                                                                                                                                                                                                                                                                                                                                                                                                                                                                                                                                                                                                                                                                    | Mikrobiologen                           | The Public Health Agency of Sweden                                        | Oskar Karlsson Lindsjo, Maria Lind Karlberg, Carlo Berg, Anna-Malin Linde, Sofia Stamouli, Samuel Ohman, Reza Advani, Mattias Haukland, Petra Holmstrom, Noura Walai, Petra Edquist, Mia Brytting, Anna Risberg, Karin Tegmark-Wisell |
| EPI_ISL_1064779                                                                                                                                                                                                                                                                                                                                                                                                                                                                                                                                                                                                                                                                                                                                                                                                                                                                                    | DOHMH Chelsea                           | New York City Public Health Laboratory                                    | Jade Wang, et al.                                                                                                                                                                                                                     |
| EPI_ISL_1064781                                                                                                                                                                                                                                                                                                                                                                                                                                                                                                                                                                                                                                                                                                                                                                                                                                                                                    | DOHMH Jamaica                           | New York City Public Health Laboratory                                    | Jade Wang, et al.                                                                                                                                                                                                                     |
| EPI_ISL_1064783                                                                                                                                                                                                                                                                                                                                                                                                                                                                                                                                                                                                                                                                                                                                                                                                                                                                                    | OCME Office Of Chief Medical Examiner   | New York City Public Health Laboratory                                    | Jade Wang, et al.                                                                                                                                                                                                                     |
| EPI_ISL_1064784                                                                                                                                                                                                                                                                                                                                                                                                                                                                                                                                                                                                                                                                                                                                                                                                                                                                                    | DOHMH Corona                            | New York City Public Health Laboratory                                    | Jade Wang, et al.                                                                                                                                                                                                                     |
| EPI_ISL_1064785                                                                                                                                                                                                                                                                                                                                                                                                                                                                                                                                                                                                                                                                                                                                                                                                                                                                                    | DOHMH Fort Greene                       | New York City Public Health Laboratory                                    | Jade Wang, et al.                                                                                                                                                                                                                     |
| EPI_ISL_1064787                                                                                                                                                                                                                                                                                                                                                                                                                                                                                                                                                                                                                                                                                                                                                                                                                                                                                    | DOHMH Morrisania                        | New York City Public Health Laboratory                                    | Jade Wang, et al.                                                                                                                                                                                                                     |
| EPI_ISL_1064788                                                                                                                                                                                                                                                                                                                                                                                                                                                                                                                                                                                                                                                                                                                                                                                                                                                                                    | DOHMH Jamaica                           | New York City Public Health Laboratory                                    | Jade Wang, et al.                                                                                                                                                                                                                     |
| EPI_ISL_1064789                                                                                                                                                                                                                                                                                                                                                                                                                                                                                                                                                                                                                                                                                                                                                                                                                                                                                    | DOHMH Corona                            | New York City Public Health Laboratory                                    | Jade Wang, et al.                                                                                                                                                                                                                     |
| EPI_ISL_1064792                                                                                                                                                                                                                                                                                                                                                                                                                                                                                                                                                                                                                                                                                                                                                                                                                                                                                    | OCME Office Of Chief Medical Examiner   | New York City Public Health Laboratory                                    | Jade Wang, et al.                                                                                                                                                                                                                     |
| EPI_ISL_1064794                                                                                                                                                                                                                                                                                                                                                                                                                                                                                                                                                                                                                                                                                                                                                                                                                                                                                    | DOHMH Fort Greene                       | New York City Public Health Laboratory                                    | Jade Wang, et al.                                                                                                                                                                                                                     |
| EPI_ISL_1064798                                                                                                                                                                                                                                                                                                                                                                                                                                                                                                                                                                                                                                                                                                                                                                                                                                                                                    | DOHMH Crown Heights                     | New York City Public Health Laboratory                                    | Jade Wang, et al.                                                                                                                                                                                                                     |
| EPI_ISL_1064799                                                                                                                                                                                                                                                                                                                                                                                                                                                                                                                                                                                                                                                                                                                                                                                                                                                                                    | DOHMH PHL                               | New York City Public Health Laboratory                                    | Jade Wang, et al.                                                                                                                                                                                                                     |
| EPI_ISL_1064800                                                                                                                                                                                                                                                                                                                                                                                                                                                                                                                                                                                                                                                                                                                                                                                                                                                                                    | NYC HH Elmhurst Hospital Medical Center | New York City Public Health Laboratory                                    | Jade Wang, et al.                                                                                                                                                                                                                     |
| EPI_ISL_1064820                                                                                                                                                                                                                                                                                                                                                                                                                                                                                                                                                                                                                                                                                                                                                                                                                                                                                    | DOHMH Central Harlem                    | New York City Public Health Laboratory                                    | Jade Wang, et al.                                                                                                                                                                                                                     |
| EPI_ISL_1064822                                                                                                                                                                                                                                                                                                                                                                                                                                                                                                                                                                                                                                                                                                                                                                                                                                                                                    | DOHMH PHL                               | New York City Public Health Laboratory                                    | Jade Wang, et al.                                                                                                                                                                                                                     |
| EPI_ISL_1064824                                                                                                                                                                                                                                                                                                                                                                                                                                                                                                                                                                                                                                                                                                                                                                                                                                                                                    | DOHMH Crown Heights                     | New York City Public Health Laboratory                                    | Jade Wang, et al.                                                                                                                                                                                                                     |
| EPI_ISL_1064825                                                                                                                                                                                                                                                                                                                                                                                                                                                                                                                                                                                                                                                                                                                                                                                                                                                                                    | DOHMH Central Harlem                    | New York City Public Health Laboratory                                    | Jade Wang, et al.                                                                                                                                                                                                                     |
| EPI_ISL_1064826                                                                                                                                                                                                                                                                                                                                                                                                                                                                                                                                                                                                                                                                                                                                                                                                                                                                                    | DOHMH PHL                               | New York City Public Health Laboratory                                    | Jade Wang, et al.                                                                                                                                                                                                                     |
| EPI_ISL_1064827                                                                                                                                                                                                                                                                                                                                                                                                                                                                                                                                                                                                                                                                                                                                                                                                                                                                                    | Department of Homeless Services         | New York City Public Health Laboratory                                    | Jade Wang, et al.                                                                                                                                                                                                                     |
| EPI_ISL_1064830                                                                                                                                                                                                                                                                                                                                                                                                                                                                                                                                                                                                                                                                                                                                                                                                                                                                                    | DOHMH Jamaica                           | New York City Public Health Laboratory                                    | Jade Wang, et al.                                                                                                                                                                                                                     |
| EPI_ISL_1064834                                                                                                                                                                                                                                                                                                                                                                                                                                                                                                                                                                                                                                                                                                                                                                                                                                                                                    | DOHMH Morrisania                        | New York City Public Health Laboratory                                    | Jade Wang, et al.                                                                                                                                                                                                                     |
| EPI_ISL_1064835                                                                                                                                                                                                                                                                                                                                                                                                                                                                                                                                                                                                                                                                                                                                                                                                                                                                                    | DOHMH Crown Heights                     | New York City Public Health Laboratory                                    | Jade Wang, et al.                                                                                                                                                                                                                     |
| EPI_ISL_1064837, EPI_ISL_1064838, EPI_ISL_1064839                                                                                                                                                                                                                                                                                                                                                                                                                                                                                                                                                                                                                                                                                                                                                                                                                                                  | DOHMH Jamaica                           | New York City Public Health Laboratory                                    | Jade Wang, et al.                                                                                                                                                                                                                     |
| EPI_ISL_1064847                                                                                                                                                                                                                                                                                                                                                                                                                                                                                                                                                                                                                                                                                                                                                                                                                                                                                    | DOHMH Corona                            | New York City Public Health Laboratory                                    | Jade Wang, et al.                                                                                                                                                                                                                     |
| EPI_ISL_1064848                                                                                                                                                                                                                                                                                                                                                                                                                                                                                                                                                                                                                                                                                                                                                                                                                                                                                    | DOHMH Jamaica                           | New York City Public Health Laboratory                                    | Jade Wang, et al.                                                                                                                                                                                                                     |
| EPI_ISL_1064849, EPI_ISL_1064850                                                                                                                                                                                                                                                                                                                                                                                                                                                                                                                                                                                                                                                                                                                                                                                                                                                                   | DOHMH Morrisania                        | New York City Public Health Laboratory                                    | Jade Wang, et al.                                                                                                                                                                                                                     |
| EPI_ISL_1064852                                                                                                                                                                                                                                                                                                                                                                                                                                                                                                                                                                                                                                                                                                                                                                                                                                                                                    | Department of Homeless Services         | New York City Public Health Laboratory                                    | Jade Wang, et al.                                                                                                                                                                                                                     |
| EPI_ISL_1064855, EPI_ISL_1064856, EPI_ISL_1064857                                                                                                                                                                                                                                                                                                                                                                                                                                                                                                                                                                                                                                                                                                                                                                                                                                                  | OCME Office Of Chief Medical Examiner   | New York City Public Health Laboratory                                    | Jade Wang, et al.                                                                                                                                                                                                                     |
| EPI_ISL_1064858                                                                                                                                                                                                                                                                                                                                                                                                                                                                                                                                                                                                                                                                                                                                                                                                                                                                                    | DOHMH Jamaica                           | New York City Public Health Laboratory                                    | Jade Wang, et al.                                                                                                                                                                                                                     |
| EPI_ISL_1064859, EPI_ISL_1064860                                                                                                                                                                                                                                                                                                                                                                                                                                                                                                                                                                                                                                                                                                                                                                                                                                                                   | DOHMH PHL                               | New York City Public Health Laboratory                                    | Jade Wang, et al.                                                                                                                                                                                                                     |
| EPI_ISL_1064861, EPI_ISL_1064862                                                                                                                                                                                                                                                                                                                                                                                                                                                                                                                                                                                                                                                                                                                                                                                                                                                                   | DOHMH Morrisania                        | New York City Public Health Laboratory                                    | Jade Wang, et al.                                                                                                                                                                                                                     |
| EPI_ISL_1064864                                                                                                                                                                                                                                                                                                                                                                                                                                                                                                                                                                                                                                                                                                                                                                                                                                                                                    | OCME Office Of Chief Medical Examiner   | New York City Public Health Laboratory                                    | Jade Wang, et al.                                                                                                                                                                                                                     |
| EPI_ISL_1064867                                                                                                                                                                                                                                                                                                                                                                                                                                                                                                                                                                                                                                                                                                                                                                                                                                                                                    | DOHMH Jamaica                           | New York City Public Health Laboratory                                    | Jade Wang, et al.                                                                                                                                                                                                                     |
| EPI_ISL_1064870                                                                                                                                                                                                                                                                                                                                                                                                                                                                                                                                                                                                                                                                                                                                                                                                                                                                                    | DOHMH Corona                            | New York City Public Health Laboratory                                    | Jade Wang, et al.                                                                                                                                                                                                                     |
| EPI_ISL_1064872                                                                                                                                                                                                                                                                                                                                                                                                                                                                                                                                                                                                                                                                                                                                                                                                                                                                                    | DOHMH Chelsea                           | New York City Public Health Laboratory                                    | Jade Wang, et al.                                                                                                                                                                                                                     |
| EPI_ISL_1064874                                                                                                                                                                                                                                                                                                                                                                                                                                                                                                                                                                                                                                                                                                                                                                                                                                                                                    | DOHMH Corona                            | New York City Public Health Laboratory                                    | Jade Wang, et al.                                                                                                                                                                                                                     |
| EPI_ISL_1064875                                                                                                                                                                                                                                                                                                                                                                                                                                                                                                                                                                                                                                                                                                                                                                                                                                                                                    | DOHMH Morrisania                        | New York City Public Health Laboratory                                    | Jade Wang, et al.                                                                                                                                                                                                                     |
| EPI_ISL_1064881, EPI_ISL_1064882                                                                                                                                                                                                                                                                                                                                                                                                                                                                                                                                                                                                                                                                                                                                                                                                                                                                   | OCME Office Of Chief Medical Examiner   | New York City Public Health Laboratory                                    | Jade Wang, et al.                                                                                                                                                                                                                     |
| EPI_ISL_1064883                                                                                                                                                                                                                                                                                                                                                                                                                                                                                                                                                                                                                                                                                                                                                                                                                                                                                    | DOHMH Crown Heights                     | New York City Public Health Laboratory                                    | Jade Wang, et al.                                                                                                                                                                                                                     |
| EPI_ISL_1064886                                                                                                                                                                                                                                                                                                                                                                                                                                                                                                                                                                                                                                                                                                                                                                                                                                                                                    | DOHMH Jamaica                           | New York City Public Health Laboratory                                    | Jade Wang, et al.                                                                                                                                                                                                                     |
| EPI_ISL_1064887                                                                                                                                                                                                                                                                                                                                                                                                                                                                                                                                                                                                                                                                                                                                                                                                                                                                                    | DOHMH PHL                               | New York City Public Health Laboratory                                    | Jade Wang, et al.                                                                                                                                                                                                                     |
| EPI_ISL_1064890                                                                                                                                                                                                                                                                                                                                                                                                                                                                                                                                                                                                                                                                                                                                                                                                                                                                                    | DOHMH Crown Heights                     | New York City Public Health Laboratory                                    | Jade Wang, et al.                                                                                                                                                                                                                     |
| EPI_ISL_1064891                                                                                                                                                                                                                                                                                                                                                                                                                                                                                                                                                                                                                                                                                                                                                                                                                                                                                    | DOHMH Fort Greene                       | New York City Public Health Laboratory                                    | Jade Wang, et al.                                                                                                                                                                                                                     |
| EPI_ISL_1064893                                                                                                                                                                                                                                                                                                                                                                                                                                                                                                                                                                                                                                                                                                                                                                                                                                                                                    | DOHMH Corona                            | New York City Public Health Laboratory                                    | Jade Wang, et al.                                                                                                                                                                                                                     |
| EPI_ISL_1064896                                                                                                                                                                                                                                                                                                                                                                                                                                                                                                                                                                                                                                                                                                                                                                                                                                                                                    | DOHMH Chelsea                           | New York City Public Health Laboratory                                    | Jade Wang, et al.                                                                                                                                                                                                                     |
| EPI_ISL_1064897                                                                                                                                                                                                                                                                                                                                                                                                                                                                                                                                                                                                                                                                                                                                                                                                                                                                                    | DOHMH Corona                            | New York City Public Health Laboratory                                    | Jade Wang, et al.                                                                                                                                                                                                                     |
| EPI_ISL_1064898                                                                                                                                                                                                                                                                                                                                                                                                                                                                                                                                                                                                                                                                                                                                                                                                                                                                                    | Department of Homeless Services         | New York City Public Health Laboratory                                    | Jade Wang, et al.                                                                                                                                                                                                                     |
| EPI_ISL_1064899, EPI_ISL_1064900, EPI_ISL_1064902, EPI_ISL_1064903                                                                                                                                                                                                                                                                                                                                                                                                                                                                                                                                                                                                                                                                                                                                                                                                                                 | OCME Office Of Chief Medical Examiner   | New York City Public Health Laboratory                                    | Jade Wang, et al.                                                                                                                                                                                                                     |
| EPI_ISL_1064906                                                                                                                                                                                                                                                                                                                                                                                                                                                                                                                                                                                                                                                                                                                                                                                                                                                                                    | DOHMH Jamaica                           | New York City Public Health Laboratory                                    | Jade Wang, et al.                                                                                                                                                                                                                     |
| EPI_ISL_1064908                                                                                                                                                                                                                                                                                                                                                                                                                                                                                                                                                                                                                                                                                                                                                                                                                                                                                    | DOHMH Riverside                         | New York City Public Health Laboratory                                    | Jade Wang, et al.                                                                                                                                                                                                                     |
| EPI_ISL_1064914                                                                                                                                                                                                                                                                                                                                                                                                                                                                                                                                                                                                                                                                                                                                                                                                                                                                                    | OCME Office Of Chief Medical Examiner   | New York City Public Health Laboratory                                    | Jade Wang, et al.                                                                                                                                                                                                                     |
| EPI_ISL_1064979                                                                                                                                                                                                                                                                                                                                                                                                                                                                                                                                                                                                                                                                                                                                                                                                                                                                                    | University of New Mexico Hospital       | Center for Global Health, University of New Mexico Health Sciences Center | Daryl Domman, Kurt Schwalm, Justin Bacca, Jon Femling, Darrell Dinwiddie                                                                                                                                                              |
| EPI_ISL_1065098, EPI_ISL_1065102, EPI_ISL_1065104, EPI_ISL_1065106, EPI_ISL_1065107, EPI_ISL_1065108, EPI_ISL_1065118, EPI_ISL_1065121, EPI_ISL_1065122, EPI_ISL_1065123, EPI_ISL_1065124, EPI_ISL_1065129, EPI_ISL_1065130, EPI_ISL_1065131, EPI_ISL_1065136, EPI_ISL_1065139, EPI_ISL_1065140, EPI_ISL_1065141, EPI_ISL_1065142, EPI_ISL_1065146, EPI_ISL_1065148, EPI_ISL_1065150, EPI_ISL_1065151, EPI_ISL_1065155, EPI_ISL_1065157, EPI_ISL_1065159, EPI_ISL_1065160, EPI_ISL_1065163, EPI_ISL_1065164, EPI_ISL_1065165, EPI_ISL_1065166, EPI_ISL_1065167, EPI_ISL_1065168, EPI_ISL_1065173, EPI_ISL_1065174, EPI_ISL_1065176, EPI_ISL_1065178, EPI_ISL_1065179, EPI_ISL_1065180, EPI_ISL_1065181, EPI_ISL_1065184, EPI_ISL_1065186, EPI_ISL_1065190, EPI_ISL_1065192, EPI_ISL_1065195, EPI_ISL_1065197, EPI_ISL_1065199, EPI_ISL_1065201, EPI_ISL_1065203, EPI_ISL_1065204, EPI_ISL_1065205, |                                         |                                                                           |                                                                                                                                                                                                                                       |



[illegible]

[illegible]

[illegible]



[illegible]

[illegible]

[illegible]

[illegible]

[illegible]

[illegible]

[illegible]

[illegible]



[illegible]

[illegible]

[illegible]

[illegible]

[illegible]

[illegible]

[illegible]

[illegible]



[illegible]

[illegible]

[illegible]

[illegible]

[illegible]

[illegible]

[illegible]

[illegible]



[illegible]

[illegible]

|                                                                                                                                                                                                                                                                                                                                                                                                                                                                                                                                                                                                                                                                                                                                                                                                                                                                                                                                                                                                                                                                                                                                                                                                                                                                                                                                                                                                                                                                                                                                                                                                                                                                                                                                                                                                                                                                                                                                                                                                                                                                                                                                                                                                                                                                                                                                                                                                                                          |           |                                                                                                                     |                                                                                  |                                                                                                                                                                                                                               |
|------------------------------------------------------------------------------------------------------------------------------------------------------------------------------------------------------------------------------------------------------------------------------------------------------------------------------------------------------------------------------------------------------------------------------------------------------------------------------------------------------------------------------------------------------------------------------------------------------------------------------------------------------------------------------------------------------------------------------------------------------------------------------------------------------------------------------------------------------------------------------------------------------------------------------------------------------------------------------------------------------------------------------------------------------------------------------------------------------------------------------------------------------------------------------------------------------------------------------------------------------------------------------------------------------------------------------------------------------------------------------------------------------------------------------------------------------------------------------------------------------------------------------------------------------------------------------------------------------------------------------------------------------------------------------------------------------------------------------------------------------------------------------------------------------------------------------------------------------------------------------------------------------------------------------------------------------------------------------------------------------------------------------------------------------------------------------------------------------------------------------------------------------------------------------------------------------------------------------------------------------------------------------------------------------------------------------------------------------------------------------------------------------------------------------------------|-----------|---------------------------------------------------------------------------------------------------------------------|----------------------------------------------------------------------------------|-------------------------------------------------------------------------------------------------------------------------------------------------------------------------------------------------------------------------------|
| EPI_ISL_1073641, EPI_ISL_1073642, EPI_ISL_1073643, EPI_ISL_1073644, EPI_ISL_1073645, EPI_ISL_1073646, EPI_ISL_1073648, EPI_ISL_1073649, EPI_ISL_1073650, EPI_ISL_1073651, EPI_ISL_1073652, EPI_ISL_1073653, EPI_ISL_1073654, EPI_ISL_1073655, EPI_ISL_1073656, EPI_ISL_1073657, EPI_ISL_1073658, EPI_ISL_1073659, EPI_ISL_1073660, EPI_ISL_1073661, EPI_ISL_1073662, EPI_ISL_1073663, EPI_ISL_1073664, EPI_ISL_1073665, EPI_ISL_1073666, EPI_ISL_1073667, EPI_ISL_1073668, EPI_ISL_1073669, EPI_ISL_1073670, EPI_ISL_1073671, EPI_ISL_1073672, EPI_ISL_1073673, EPI_ISL_1073674, EPI_ISL_1073675, EPI_ISL_1073676, EPI_ISL_1073677, EPI_ISL_1073678, EPI_ISL_1073679, EPI_ISL_1073680, EPI_ISL_1073681, EPI_ISL_1073682, EPI_ISL_1073684, EPI_ISL_1073685, EPI_ISL_1073686, EPI_ISL_1073687, EPI_ISL_1073688, EPI_ISL_1073689, EPI_ISL_1073690, EPI_ISL_1073691, EPI_ISL_1073692, EPI_ISL_1073693, EPI_ISL_1073694, EPI_ISL_1073695, EPI_ISL_1073696, EPI_ISL_1073697, EPI_ISL_1073698, EPI_ISL_1073699, EPI_ISL_1073700, EPI_ISL_1073701, EPI_ISL_1073702, EPI_ISL_1073703, EPI_ISL_1073704, EPI_ISL_1073705, EPI_ISL_1073706, EPI_ISL_1073707, EPI_ISL_1073708, EPI_ISL_1073709, EPI_ISL_1073710, EPI_ISL_1073711, EPI_ISL_1073712, EPI_ISL_1073713, EPI_ISL_1073714, EPI_ISL_1073715, EPI_ISL_1073716, EPI_ISL_1073717, EPI_ISL_1073718, EPI_ISL_1073719, EPI_ISL_1073720, EPI_ISL_1073721, EPI_ISL_1073722, EPI_ISL_1073723, EPI_ISL_1073724, EPI_ISL_1073725, EPI_ISL_1073726, EPI_ISL_1073727, EPI_ISL_1073728, EPI_ISL_1073729, EPI_ISL_1073731, EPI_ISL_1073732, EPI_ISL_1073748, EPI_ISL_1073749, EPI_ISL_1073750, EPI_ISL_1073751, EPI_ISL_1073752, EPI_ISL_1073753, EPI_ISL_1073754, EPI_ISL_1073755, EPI_ISL_1073756, EPI_ISL_1073757, EPI_ISL_1073758, EPI_ISL_1073759, EPI_ISL_1073760, EPI_ISL_1073761, EPI_ISL_1073762, EPI_ISL_1073763, EPI_ISL_1073764, EPI_ISL_1073765, EPI_ISL_1073766, EPI_ISL_1073767, EPI_ISL_1073768, EPI_ISL_1073769, EPI_ISL_1073770, EPI_ISL_1073771, EPI_ISL_1073772, EPI_ISL_1073773, EPI_ISL_1073774, EPI_ISL_1073775, EPI_ISL_1073776, EPI_ISL_1073777, EPI_ISL_1073778, EPI_ISL_1073779, EPI_ISL_1073780, EPI_ISL_1073781, EPI_ISL_1073782, EPI_ISL_1073783, EPI_ISL_1073784, EPI_ISL_1073786, EPI_ISL_1073793, EPI_ISL_1073794, EPI_ISL_1073795, EPI_ISL_1073804, EPI_ISL_1073805, EPI_ISL_1073806, EPI_ISL_1073807, EPI_ISL_1073808, EPI_ISL_1073809, EPI_ISL_1073810, EPI_ISL_1073811 | see above | Ministry of Health Turkey                                                                                           | Ministry of Health Turkey                                                        | Fatma Bayrakdar, Yasemin Cogun, Süleyman Yalcin, Aye Baak Alta, Gülay Korukluolu                                                                                                                                              |
| EPI_ISL_1073911, EPI_ISL_1073912                                                                                                                                                                                                                                                                                                                                                                                                                                                                                                                                                                                                                                                                                                                                                                                                                                                                                                                                                                                                                                                                                                                                                                                                                                                                                                                                                                                                                                                                                                                                                                                                                                                                                                                                                                                                                                                                                                                                                                                                                                                                                                                                                                                                                                                                                                                                                                                                         |           | Lab voor klinische biologie                                                                                         | Lab voor klinische biologie                                                      | Marija Janevska, Hannelore Hamerlinck, Bruno Verhasselt                                                                                                                                                                       |
| EPI_ISL_1073920                                                                                                                                                                                                                                                                                                                                                                                                                                                                                                                                                                                                                                                                                                                                                                                                                                                                                                                                                                                                                                                                                                                                                                                                                                                                                                                                                                                                                                                                                                                                                                                                                                                                                                                                                                                                                                                                                                                                                                                                                                                                                                                                                                                                                                                                                                                                                                                                                          |           | Medical Microbiology Unit, Department for Laboratory Medicine, Drammen Hospital, Vestre Viken Health Trust,         | Norwegian Institute of Public Health, Department of Virology                     | Kathrine Stene-Johansen, Kamilla Heddeland Instefjord, Hilde Elshaug, Garcia Llorente Ignacio, Engebretsen Serina Beate Atiya R Ali,Marie Paulsen Madsen, Rasmus Riis Kopperud, Hilde Vollan, Karoline Bragstad, Olav Hungnes |
| EPI_ISL_1073921, EPI_ISL_1073922                                                                                                                                                                                                                                                                                                                                                                                                                                                                                                                                                                                                                                                                                                                                                                                                                                                                                                                                                                                                                                                                                                                                                                                                                                                                                                                                                                                                                                                                                                                                                                                                                                                                                                                                                                                                                                                                                                                                                                                                                                                                                                                                                                                                                                                                                                                                                                                                         |           | Norwegian Institute of Public Health, Department of Virology                                                        | Norwegian Institute of Public Health, Department of Virology                     | Kathrine Stene-Johansen, Kamilla Heddeland Instefjord, Hilde Elshaug, Garcia Llorente Ignacio, Engebretsen Serina Beate Atiya R Ali,Marie Paulsen Madsen, Rasmus Riis Kopperud, Hilde Vollan, Karoline Bragstad, Olav Hungnes |
| EPI_ISL_1073926                                                                                                                                                                                                                                                                                                                                                                                                                                                                                                                                                                                                                                                                                                                                                                                                                                                                                                                                                                                                                                                                                                                                                                                                                                                                                                                                                                                                                                                                                                                                                                                                                                                                                                                                                                                                                                                                                                                                                                                                                                                                                                                                                                                                                                                                                                                                                                                                                          |           | Akershus University Hospital, Department for Microbiology and Infectious Disease Control                            | Norwegian Institute of Public Health, Department of Virology                     | Kathrine Stene-Johansen, Kamilla Heddeland Instefjord, Hilde Elshaug, Garcia Llorente Ignacio, Engebretsen Serina Beate Atiya R Ali,Marie Paulsen Madsen, Rasmus Riis Kopperud, Hilde Vollan, Karoline Bragstad, Olav Hungnes |
| EPI_ISL_1073927, EPI_ISL_1073929                                                                                                                                                                                                                                                                                                                                                                                                                                                                                                                                                                                                                                                                                                                                                                                                                                                                                                                                                                                                                                                                                                                                                                                                                                                                                                                                                                                                                                                                                                                                                                                                                                                                                                                                                                                                                                                                                                                                                                                                                                                                                                                                                                                                                                                                                                                                                                                                         |           | Ostfold Hospital Trust - Kalnes, Centre for Laboratory Medicine, Section for gene technology and infection serology | Norwegian Institute of Public Health, Department of Virology                     | Kathrine Stene-Johansen, Kamilla Heddeland Instefjord, Hilde Elshaug, Garcia Llorente Ignacio, Engebretsen Serina Beate Atiya R Ali,Marie Paulsen Madsen, Rasmus Riis Kopperud, Hilde Vollan, Karoline Bragstad, Olav Hungnes |
| EPI_ISL_1073930                                                                                                                                                                                                                                                                                                                                                                                                                                                                                                                                                                                                                                                                                                                                                                                                                                                                                                                                                                                                                                                                                                                                                                                                                                                                                                                                                                                                                                                                                                                                                                                                                                                                                                                                                                                                                                                                                                                                                                                                                                                                                                                                                                                                                                                                                                                                                                                                                          |           | Akershus University Hospital, Department for Microbiology and Infectious Disease Control                            | Norwegian Institute of Public Health, Department of Virology                     | Kathrine Stene-Johansen, Kamilla Heddeland Instefjord, Hilde Elshaug, Garcia Llorente Ignacio, Engebretsen Serina Beate Atiya R Ali,Marie Paulsen Madsen, Rasmus Riis Kopperud, Hilde Vollan, Karoline Bragstad, Olav Hungnes |
| EPI_ISL_1073931                                                                                                                                                                                                                                                                                                                                                                                                                                                                                                                                                                                                                                                                                                                                                                                                                                                                                                                                                                                                                                                                                                                                                                                                                                                                                                                                                                                                                                                                                                                                                                                                                                                                                                                                                                                                                                                                                                                                                                                                                                                                                                                                                                                                                                                                                                                                                                                                                          |           | Furst Medical Laboratory                                                                                            | Norwegian Institute of Public Health, Department of Virology                     | Kathrine Stene-Johansen, Kamilla Heddeland Instefjord, Hilde Elshaug, Garcia Llorente Ignacio, Engebretsen Serina Beate Atiya R Ali,Marie Paulsen Madsen, Rasmus Riis Kopperud, Hilde Vollan, Karoline Bragstad, Olav Hungnes |
| EPI_ISL_1073933                                                                                                                                                                                                                                                                                                                                                                                                                                                                                                                                                                                                                                                                                                                                                                                                                                                                                                                                                                                                                                                                                                                                                                                                                                                                                                                                                                                                                                                                                                                                                                                                                                                                                                                                                                                                                                                                                                                                                                                                                                                                                                                                                                                                                                                                                                                                                                                                                          |           | Akershus University Hospital, Department for Microbiology and Infectious Disease Control                            | Norwegian Institute of Public Health, Department of Virology                     | Kathrine Stene-Johansen, Kamilla Heddeland Instefjord, Hilde Elshaug, Garcia Llorente Ignacio, Engebretsen Serina Beate Atiya R Ali,Marie Paulsen Madsen, Rasmus Riis Kopperud, Hilde Vollan, Karoline Bragstad, Olav Hungnes |
| EPI_ISL_1073937                                                                                                                                                                                                                                                                                                                                                                                                                                                                                                                                                                                                                                                                                                                                                                                                                                                                                                                                                                                                                                                                                                                                                                                                                                                                                                                                                                                                                                                                                                                                                                                                                                                                                                                                                                                                                                                                                                                                                                                                                                                                                                                                                                                                                                                                                                                                                                                                                          |           | Medical Microbiology Unit, Department for Laboratory Medicine, Drammen Hospital, Vestre Viken Health Trust,         | Norwegian Institute of Public Health, Department of Virology                     | Kathrine Stene-Johansen, Kamilla Heddeland Instefjord, Hilde Elshaug, Garcia Llorente Ignacio, Engebretsen Serina Beate Atiya R Ali,Marie Paulsen Madsen, Rasmus Riis Kopperud, Hilde Vollan, Karoline Bragstad, Olav Hungnes |
| EPI_ISL_1073939                                                                                                                                                                                                                                                                                                                                                                                                                                                                                                                                                                                                                                                                                                                                                                                                                                                                                                                                                                                                                                                                                                                                                                                                                                                                                                                                                                                                                                                                                                                                                                                                                                                                                                                                                                                                                                                                                                                                                                                                                                                                                                                                                                                                                                                                                                                                                                                                                          |           | Norwegian Institute of Public Health, Department of Virology                                                        | Norwegian Institute of Public Health, Department of Virology                     | Kathrine Stene-Johansen, Kamilla Heddeland Instefjord, Hilde Elshaug, Garcia Llorente Ignacio, Engebretsen Serina Beate Atiya R Ali,Marie Paulsen Madsen, Rasmus Riis Kopperud, Hilde Vollan, Karoline Bragstad, Olav Hungnes |
| EPI_ISL_1073942                                                                                                                                                                                                                                                                                                                                                                                                                                                                                                                                                                                                                                                                                                                                                                                                                                                                                                                                                                                                                                                                                                                                                                                                                                                                                                                                                                                                                                                                                                                                                                                                                                                                                                                                                                                                                                                                                                                                                                                                                                                                                                                                                                                                                                                                                                                                                                                                                          |           | Department of Medical Microbiology, St. Olavs hospital                                                              | Norwegian Institute of Public Health, Department of Virology                     | Kathrine Stene-Johansen, Kamilla Heddeland Instefjord, Hilde Elshaug, Garcia Llorente Ignacio, Engebretsen Serina Beate Atiya R Ali,Marie Paulsen Madsen, Rasmus Riis Kopperud, Hilde Vollan, Karoline Bragstad, Olav Hungnes |
| EPI_ISL_1073943                                                                                                                                                                                                                                                                                                                                                                                                                                                                                                                                                                                                                                                                                                                                                                                                                                                                                                                                                                                                                                                                                                                                                                                                                                                                                                                                                                                                                                                                                                                                                                                                                                                                                                                                                                                                                                                                                                                                                                                                                                                                                                                                                                                                                                                                                                                                                                                                                          |           | Akershus University Hospital, Department for Microbiology and Infectious Disease Control                            | Norwegian Institute of Public Health, Department of Virology                     | Kathrine Stene-Johansen, Kamilla Heddeland Instefjord, Hilde Elshaug, Garcia Llorente Ignacio, Engebretsen Serina Beate Atiya R Ali,Marie Paulsen Madsen, Rasmus Riis Kopperud, Hilde Vollan, Karoline Bragstad, Olav Hungnes |
| EPI_ISL_1073944, EPI_ISL_1073945                                                                                                                                                                                                                                                                                                                                                                                                                                                                                                                                                                                                                                                                                                                                                                                                                                                                                                                                                                                                                                                                                                                                                                                                                                                                                                                                                                                                                                                                                                                                                                                                                                                                                                                                                                                                                                                                                                                                                                                                                                                                                                                                                                                                                                                                                                                                                                                                         |           | Department of Medical Microbiology - section Molde, Molde Hospital                                                  | Norwegian Institute of Public Health, Department of Virology                     | Kathrine Stene-Johansen, Kamilla Heddeland Instefjord, Hilde Elshaug, Garcia Llorente Ignacio, Engebretsen Serina Beate Atiya R Ali,Marie Paulsen Madsen, Rasmus Riis Kopperud, Hilde Vollan, Karoline Bragstad, Olav Hungnes |
| EPI_ISL_1073946                                                                                                                                                                                                                                                                                                                                                                                                                                                                                                                                                                                                                                                                                                                                                                                                                                                                                                                                                                                                                                                                                                                                                                                                                                                                                                                                                                                                                                                                                                                                                                                                                                                                                                                                                                                                                                                                                                                                                                                                                                                                                                                                                                                                                                                                                                                                                                                                                          |           | Ostfold Hospital Trust - Kalnes, Centre for Laboratory Medicine, Section for gene technology and infection serology | Norwegian Institute of Public Health, Department of Virology                     | Kathrine Stene-Johansen, Kamilla Heddeland Instefjord, Hilde Elshaug, Garcia Llorente Ignacio, Engebretsen Serina Beate Atiya R Ali,Marie Paulsen Madsen, Rasmus Riis Kopperud, Hilde Vollan, Karoline Bragstad, Olav Hungnes |
| EPI_ISL_1073951                                                                                                                                                                                                                                                                                                                                                                                                                                                                                                                                                                                                                                                                                                                                                                                                                                                                                                                                                                                                                                                                                                                                                                                                                                                                                                                                                                                                                                                                                                                                                                                                                                                                                                                                                                                                                                                                                                                                                                                                                                                                                                                                                                                                                                                                                                                                                                                                                          |           | Akershus University Hospital, Department for Microbiology and Infectious Disease Control                            | Norwegian Institute of Public Health, Department of Virology                     | Kathrine Stene-Johansen, Kamilla Heddeland Instefjord, Hilde Elshaug, Garcia Llorente Ignacio, Engebretsen Serina Beate Atiya R Ali,Marie Paulsen Madsen, Rasmus Riis Kopperud, Hilde Vollan, Karoline Bragstad, Olav Hungnes |
| EPI_ISL_1073952                                                                                                                                                                                                                                                                                                                                                                                                                                                                                                                                                                                                                                                                                                                                                                                                                                                                                                                                                                                                                                                                                                                                                                                                                                                                                                                                                                                                                                                                                                                                                                                                                                                                                                                                                                                                                                                                                                                                                                                                                                                                                                                                                                                                                                                                                                                                                                                                                          |           | Furst Medical Laboratory                                                                                            | Norwegian Institute of Public Health, Department of Virology                     | Kathrine Stene-Johansen, Kamilla Heddeland Instefjord, Hilde Elshaug, Garcia Llorente Ignacio, Engebretsen Serina Beate Atiya R Ali,Marie Paulsen Madsen, Rasmus Riis Kopperud, Hilde Vollan, Karoline Bragstad, Olav Hungnes |
| EPI_ISL_1075267                                                                                                                                                                                                                                                                                                                                                                                                                                                                                                                                                                                                                                                                                                                                                                                                                                                                                                                                                                                                                                                                                                                                                                                                                                                                                                                                                                                                                                                                                                                                                                                                                                                                                                                                                                                                                                                                                                                                                                                                                                                                                                                                                                                                                                                                                                                                                                                                                          |           | Instituto Nacional de Medicina Genomica                                                                             | Instituto Nacional de Medicina Genomica                                          | Hidalgo-Miranda A, Mendoza-Vargas A, Reyes-Grajeda JP, Cedro-Tanda A, Alcaraz N, Gonzalez-Barrera D, Rangel-DeLeon D, Ramirez-Vega O, Sifuentes-Rojas C, Cisneros-Villanueva M, Herrera-Montalvo LA                           |
| EPI_ISL_1076371, EPI_ISL_1076373, EPI_ISL_1076376                                                                                                                                                                                                                                                                                                                                                                                                                                                                                                                                                                                                                                                                                                                                                                                                                                                                                                                                                                                                                                                                                                                                                                                                                                                                                                                                                                                                                                                                                                                                                                                                                                                                                                                                                                                                                                                                                                                                                                                                                                                                                                                                                                                                                                                                                                                                                                                        |           | SYNLAB - Laboratoire J. Collard                                                                                     | GIGA Medical Genomics                                                            | Keith Durkin, Maria Artesi, Sébastien Bontems, Raphaël Boreux, Bouchra Boujemla, Nathalie Renotte, Cécile Meex, Pierrette Melin, Marie-Pierre Hayette, Vincent Bours                                                          |
| EPI_ISL_1076380                                                                                                                                                                                                                                                                                                                                                                                                                                                                                                                                                                                                                                                                                                                                                                                                                                                                                                                                                                                                                                                                                                                                                                                                                                                                                                                                                                                                                                                                                                                                                                                                                                                                                                                                                                                                                                                                                                                                                                                                                                                                                                                                                                                                                                                                                                                                                                                                                          |           | St. Nikolaus-Hospital Eupen                                                                                         | GIGA Medical Genomics                                                            | Keith Durkin, Maria Artesi, Sébastien Bontems, Raphaël Boreux, Bouchra Boujemla, Nathalie Renotte, Cécile Meex, Pierrette Melin, Marie-Pierre Hayette, Vincent Bours                                                          |
| EPI_ISL_1076381                                                                                                                                                                                                                                                                                                                                                                                                                                                                                                                                                                                                                                                                                                                                                                                                                                                                                                                                                                                                                                                                                                                                                                                                                                                                                                                                                                                                                                                                                                                                                                                                                                                                                                                                                                                                                                                                                                                                                                                                                                                                                                                                                                                                                                                                                                                                                                                                                          |           | Department of Clinical Microbiology                                                                                 | GIGA Medical Genomics                                                            | Keith Durkin, Maria Artesi, Sébastien Bontems, Raphaël Boreux, Bouchra Boujemla, Nathalie Renotte, Cécile Meex, Pierrette Melin, Marie-Pierre Hayette, Vincent Bours                                                          |
| EPI_ISL_1076385, EPI_ISL_1076387, EPI_ISL_1076388, EPI_ISL_1076391                                                                                                                                                                                                                                                                                                                                                                                                                                                                                                                                                                                                                                                                                                                                                                                                                                                                                                                                                                                                                                                                                                                                                                                                                                                                                                                                                                                                                                                                                                                                                                                                                                                                                                                                                                                                                                                                                                                                                                                                                                                                                                                                                                                                                                                                                                                                                                       |           | SYNLAB - Laboratoire J. Collard                                                                                     | GIGA Medical Genomics                                                            | Keith Durkin, Maria Artesi, Sébastien Bontems, Raphaël Boreux, Bouchra Boujemla, Nathalie Renotte, Cécile Meex, Pierrette Melin, Marie-Pierre Hayette, Vincent Bours                                                          |
| EPI_ISL_1076398                                                                                                                                                                                                                                                                                                                                                                                                                                                                                                                                                                                                                                                                                                                                                                                                                                                                                                                                                                                                                                                                                                                                                                                                                                                                                                                                                                                                                                                                                                                                                                                                                                                                                                                                                                                                                                                                                                                                                                                                                                                                                                                                                                                                                                                                                                                                                                                                                          |           | CHR de La Citadelle                                                                                                 | GIGA Medical Genomics                                                            | Keith Durkin, Maria Artesi, Sébastien Bontems, Raphaël Boreux, Bouchra Boujemla, Nathalie Renotte, Cécile Meex, Pierrette Melin, Marie-Pierre Hayette, Vincent Bours                                                          |
| EPI_ISL_1076408, EPI_ISL_1076422, EPI_ISL_1076428, EPI_ISL_1076429                                                                                                                                                                                                                                                                                                                                                                                                                                                                                                                                                                                                                                                                                                                                                                                                                                                                                                                                                                                                                                                                                                                                                                                                                                                                                                                                                                                                                                                                                                                                                                                                                                                                                                                                                                                                                                                                                                                                                                                                                                                                                                                                                                                                                                                                                                                                                                       |           | SYNLAB - Laboratoire J. Collard                                                                                     | GIGA Medical Genomics                                                            | Keith Durkin, Maria Artesi, Sébastien Bontems, Raphaël Boreux, Bouchra Boujemla, Nathalie Renotte, Cécile Meex, Pierrette Melin, Marie-Pierre Hayette, Vincent Bours                                                          |
| EPI_ISL_1076438                                                                                                                                                                                                                                                                                                                                                                                                                                                                                                                                                                                                                                                                                                                                                                                                                                                                                                                                                                                                                                                                                                                                                                                                                                                                                                                                                                                                                                                                                                                                                                                                                                                                                                                                                                                                                                                                                                                                                                                                                                                                                                                                                                                                                                                                                                                                                                                                                          |           | St. Nikolaus-Hospital Eupen                                                                                         | GIGA Medical Genomics                                                            | Keith Durkin, Maria Artesi, Sébastien Bontems, Raphaël Boreux, Bouchra Boujemla, Nathalie Renotte, Cécile Meex, Pierrette Melin, Marie-Pierre Hayette, Vincent Bours                                                          |
| EPI_ISL_1076443                                                                                                                                                                                                                                                                                                                                                                                                                                                                                                                                                                                                                                                                                                                                                                                                                                                                                                                                                                                                                                                                                                                                                                                                                                                                                                                                                                                                                                                                                                                                                                                                                                                                                                                                                                                                                                                                                                                                                                                                                                                                                                                                                                                                                                                                                                                                                                                                                          |           | SYNLAB - Laboratoire J. Collard                                                                                     | GIGA Medical Genomics                                                            | Keith Durkin, Maria Artesi, Sébastien Bontems, Raphaël Boreux, Bouchra Boujemla, Nathalie Renotte, Cécile Meex, Pierrette Melin, Marie-Pierre Hayette, Vincent Bours                                                          |
| EPI_ISL_1076449, EPI_ISL_1076450, EPI_ISL_1076452, EPI_ISL_1076453, EPI_ISL_1076455, EPI_ISL_1076456, EPI_ISL_1076459                                                                                                                                                                                                                                                                                                                                                                                                                                                                                                                                                                                                                                                                                                                                                                                                                                                                                                                                                                                                                                                                                                                                                                                                                                                                                                                                                                                                                                                                                                                                                                                                                                                                                                                                                                                                                                                                                                                                                                                                                                                                                                                                                                                                                                                                                                                    |           | Department of Clinical Microbiology                                                                                 | GIGA Medical Genomics                                                            | Keith Durkin, Maria Artesi, Sébastien Bontems, Raphaël Boreux, Bouchra Boujemla, Nathalie Renotte, Cécile Meex, Pierrette Melin, Marie-Pierre Hayette, Vincent Bours                                                          |
| EPI_ISL_1078995, EPI_ISL_1078996, EPI_ISL_1078997, EPI_ISL_1078999, EPI_ISL_1079000, EPI_ISL_1079004, EPI_ISL_1079006, EPI_ISL_1079159, EPI_ISL_1079165                                                                                                                                                                                                                                                                                                                                                                                                                                                                                                                                                                                                                                                                                                                                                                                                                                                                                                                                                                                                                                                                                                                                                                                                                                                                                                                                                                                                                                                                                                                                                                                                                                                                                                                                                                                                                                                                                                                                                                                                                                                                                                                                                                                                                                                                                  |           | IAL Regional de Bauru                                                                                               | Instituto Adolfo Lutz, Interdisciplinary Procedures Center, Strategic Laboratory | Claudio Tavares Sacchi, Claudia Regina Gonçalves, Erica Valessa Ramos Gomes, Karoline Rodrigues Campos                                                                                                                        |
| EPI_ISL_1079993                                                                                                                                                                                                                                                                                                                                                                                                                                                                                                                                                                                                                                                                                                                                                                                                                                                                                                                                                                                                                                                                                                                                                                                                                                                                                                                                                                                                                                                                                                                                                                                                                                                                                                                                                                                                                                                                                                                                                                                                                                                                                                                                                                                                                                                                                                                                                                                                                          |           | Ospedale S.M. Goretti di Latina - ASL Latina presidio ospedaliero Nord                                              | INMI Lazzaro Spallanzani IRCCS                                                   | B Bartolini, E Giombini, F Messina, O Butera, M Rueca, CEM Gruber, L Di Biase, A Lucci, A Di Caro, MR Capobianchi                                                                                                             |
| EPI_ISL_1079994                                                                                                                                                                                                                                                                                                                                                                                                                                                                                                                                                                                                                                                                                                                                                                                                                                                                                                                                                                                                                                                                                                                                                                                                                                                                                                                                                                                                                                                                                                                                                                                                                                                                                                                                                                                                                                                                                                                                                                                                                                                                                                                                                                                                                                                                                                                                                                                                                          |           | Azienda Ospedaliera San Camillo Forlanini                                                                           | INMI Lazzaro Spallanzani IRCCS                                                   | O Butera, E Giombini, F Messina, M Rueca, CEM Gruber, B Bartolini, G Parisi, MI Consalvo, MR Capobianchi, A Di Caro                                                                                                           |
| EPI_ISL_1079995                                                                                                                                                                                                                                                                                                                                                                                                                                                                                                                                                                                                                                                                                                                                                                                                                                                                                                                                                                                                                                                                                                                                                                                                                                                                                                                                                                                                                                                                                                                                                                                                                                                                                                                                                                                                                                                                                                                                                                                                                                                                                                                                                                                                                                                                                                                                                                                                                          |           | INMI Lazzaro Spallanzani IRCCS                                                                                      | INMI Lazzaro Spallanzani IRCCS                                                   | E Giombini, F Messina, M Rueca, O Butera, CEM Gruber, B Bartolini, A Di Caro, MR Capobianchi                                                                                                                                  |
| EPI_ISL_1079996                                                                                                                                                                                                                                                                                                                                                                                                                                                                                                                                                                                                                                                                                                                                                                                                                                                                                                                                                                                                                                                                                                                                                                                                                                                                                                                                                                                                                                                                                                                                                                                                                                                                                                                                                                                                                                                                                                                                                                                                                                                                                                                                                                                                                                                                                                                                                                                                                          |           | Ospedale Sandro Pertini ASL Roma2                                                                                   | INMI Lazzaro Spallanzani IRCCS                                                   | F Messina, M Rueca, O Butera, CEM Gruber, B Bartolini, E Giombini, MC Cava, G Cappiello, MR Capobianchi, A Di Caro                                                                                                            |



[illegible]

[illegible]

[illegible]

[illegible]



[illegible]

[illegible]

[illegible]





[illegible]



[illegible]



[illegible]

EPI\_ISL\_1084815, EPI\_ISL\_1084816, EPI\_ISL\_1084817, EPI\_ISL\_1084818, EPI\_ISL\_1084819, EPI\_ISL\_1084821, EPI\_ISL\_1084822, EPI\_ISL\_1084824, EPI\_ISL\_1084825, EPI\_ISL\_1084826, EPI\_ISL\_1084828, EPI\_ISL\_1084829, EPI\_ISL\_1084831, EPI\_ISL\_1084832, EPI\_ISL\_1084833, EPI\_ISL\_1084834, EPI\_ISL\_1084835, EPI\_ISL\_1084836, EPI\_ISL\_1084837, EPI\_ISL\_1084838, EPI\_ISL\_1084839, EPI\_ISL\_1084840, EPI\_ISL\_1084841, EPI\_ISL\_1084842, EPI\_ISL\_1084843, EPI\_ISL\_1084844, EPI\_ISL\_1084846, EPI\_ISL\_1084847, EPI\_ISL\_1084848, EPI\_ISL\_1084849, EPI\_ISL\_1084850, EPI\_ISL\_1084851, EPI\_ISL\_1084852, EPI\_ISL\_1084853, EPI\_ISL\_1084854, EPI\_ISL\_1084855, EPI\_ISL\_1084856, EPI\_ISL\_1084857, EPI\_ISL\_1084858, EPI\_ISL\_1084859, EPI\_ISL\_1084860, EPI\_ISL\_1084861, EPI\_ISL\_1084862, EPI\_ISL\_1084863, EPI\_ISL\_1084865, EPI\_ISL\_1084866, EPI\_ISL\_1084867, EPI\_ISL\_1084868, EPI\_ISL\_1084869, EPI\_ISL\_1084870, EPI\_ISL\_1084871, EPI\_ISL\_1084872, EPI\_ISL\_1084873, EPI\_ISL\_1084874, EPI\_ISL\_1084875, EPI\_ISL\_1084876, EPI\_ISL\_1084877, EPI\_ISL\_1084878, EPI\_ISL\_1084879, EPI\_ISL\_1084880, EPI\_ISL\_1084881, EPI\_ISL\_1084882, EPI\_ISL\_1084883, EPI\_ISL\_1084884, EPI\_ISL\_1084885, EPI\_ISL\_1084886, EPI\_ISL\_1084887, EPI\_ISL\_1084888, EPI\_ISL\_1084889, EPI\_ISL\_1084890, EPI\_ISL\_1084891, EPI\_ISL\_1084892, EPI\_ISL\_1084893, EPI\_ISL\_1084894, EPI\_ISL\_1084895, EPI\_ISL\_1084896, EPI\_ISL\_1084897, EPI\_ISL\_1084898, EPI\_ISL\_1084900, EPI\_ISL\_1084901, EPI\_ISL\_1084902, EPI\_ISL\_1084903, EPI\_ISL\_1084904, EPI\_ISL\_1084905, EPI\_ISL\_1084906, EPI\_ISL\_1084907, EPI\_ISL\_1084908, EPI\_ISL\_1084909, EPI\_ISL\_1084910, EPI\_ISL\_1084911, EPI\_ISL\_1084912, EPI\_ISL\_1084913, EPI\_ISL\_1084914, EPI\_ISL\_1084915, EPI\_ISL\_1084916, EPI\_ISL\_1084917, EPI\_ISL\_1084918, EPI\_ISL\_1084919, EPI\_ISL\_1084920, EPI\_ISL\_1084921, EPI\_ISL\_1084922, EPI\_ISL\_1084923, EPI\_ISL\_1084924, EPI\_ISL\_1084925, EPI\_ISL\_1084927, EPI\_ISL\_1084928, EPI\_ISL\_1084929, EPI\_ISL\_1084930, EPI\_ISL\_1084931, EPI\_ISL\_1084932, EPI\_ISL\_1084933, EPI\_ISL\_1084934, EPI\_ISL\_1084935, EPI\_ISL\_1084936, EPI\_ISL\_1084938, EPI\_ISL\_1084939, EPI\_ISL\_1084940, EPI\_ISL\_1084941, EPI\_ISL\_1084942, EPI\_ISL\_1084943, EPI\_ISL\_1084944, EPI\_ISL\_1084945, EPI\_ISL\_1084946, EPI\_ISL\_1084947, EPI\_ISL\_1084948, EPI\_ISL\_1084949, EPI\_ISL\_1084950, EPI\_ISL\_1084951, EPI\_ISL\_1084952, EPI\_ISL\_1084953, EPI\_ISL\_1084954, EPI\_ISL\_1084955, EPI\_ISL\_1084956, EPI\_ISL\_1084958, EPI\_ISL\_1084959, EPI\_ISL\_1084960, EPI\_ISL\_1084962, EPI\_ISL\_1084963, EPI\_ISL\_1084964, EPI\_ISL\_1084965, EPI\_ISL\_1084966, EPI\_ISL\_1084967, EPI\_ISL\_1084968, EPI\_ISL\_1084969, EPI\_ISL\_1084970, EPI\_ISL\_1084971, EPI\_ISL\_1084972, EPI\_ISL\_1084973, EPI\_ISL\_1084974, EPI\_ISL\_1084975, EPI\_ISL\_1084976, EPI\_ISL\_1084977, EPI\_ISL\_1084979, EPI\_ISL\_1084981, EPI\_ISL\_1084982, EPI\_ISL\_1084983, EPI\_ISL\_1084984, EPI\_ISL\_1084985, EPI\_ISL\_1084986, EPI\_ISL\_1084987, EPI\_ISL\_1084988, EPI\_ISL\_1084989, EPI\_ISL\_1084990, EPI\_ISL\_1084992, EPI\_ISL\_1084993, EPI\_ISL\_1084994, EPI\_ISL\_1084995, EPI\_ISL\_1084996, EPI\_ISL\_1084997, EPI\_ISL\_1084998, EPI\_ISL\_1085000, EPI\_ISL\_1085001, EPI\_ISL\_1085002, EPI\_ISL\_1085003, EPI\_ISL\_1085004, EPI\_ISL\_1085005

|                                                   |                                                        |                                                                                                                                            |                                                                                                                                                                                                     |
|---------------------------------------------------|--------------------------------------------------------|--------------------------------------------------------------------------------------------------------------------------------------------|-----------------------------------------------------------------------------------------------------------------------------------------------------------------------------------------------------|
| see above                                         | University Hospitals of Geneva, Laboratory of Virology | HUG, Laboratory of Virology and the Health2030 Genome Center                                                                               | Samuel Cordey, Ana Rita Goncalves, Laurent Kaiser, Lorenzo Cerutti, Henri Pegéot, Melyssa Elies, Deborah Penet, Keith Harshman, Ioannis Xenarios, Emmanouil Dermitzakis                             |
| EPI_ISL_1085370                                   | CHR METZ THIONVILLE Hôpital de Mercy                   | Department of Virology, Henri Mondor University Hospital, Assistance Publique Hôpitaux de Paris, Université Paris-Est Créteil, INSERM U955 | Christophe Rodriguez, Slim Fourati, Vanessa Demontant, Guillaume Gricourt, Melissa N'Debi, Alexandre Soulier, Elisabeth Trawinski, Jean-Michel Pawlotsky                                            |
| EPI_ISL_1085387, EPI_ISL_1085389, EPI_ISL_1085391 | Hôpital Henri Mondor                                   | Department of Virology, Henri Mondor University Hospital, Assistance Publique Hôpitaux de Paris, Université Paris-Est Créteil, INSERM U955 | Christophe Rodriguez, Slim Fourati, Vanessa Demontant, Guillaume Gricourt, Melissa N'Debi, Alexandre Soulier, Elisabeth Trawinski, Jean-Michel Pawlotsky                                            |
| EPI_ISL_1085393, EPI_ISL_1085394                  | CH.INTERCOMMUNAL DE CRETEIL                            | Department of Virology, Henri Mondor University Hospital, Assistance Publique Hôpitaux de Paris, Université Paris-Est Créteil, INSERM U955 | Christophe Rodriguez, Slim Fourati, Vanessa Demontant, Guillaume Gricourt, Melissa N'Debi, Alexandre Soulier, Elisabeth Trawinski, Jean-Michel Pawlotsky                                            |
| EPI_ISL_1085399, EPI_ISL_1085400                  | Hôpital Henri Mondor                                   | Department of Virology, Henri Mondor University Hospital, Assistance Publique Hôpitaux de Paris, Université Paris-Est Créteil, INSERM U955 | Christophe Rodriguez, Slim Fourati, Vanessa Demontant, Guillaume Gricourt, Melissa N'Debi, Alexandre Soulier, Elisabeth Trawinski, Jean-Michel Pawlotsky                                            |
| EPI_ISL_1085405                                   | CRICQUEBOEUF Cerballiance Normandie                    | Department of Virology, Henri Mondor University Hospital, Assistance Publique Hôpitaux de Paris, Université Paris-Est Créteil, INSERM U955 | Christophe Rodriguez, Slim Fourati, Vanessa Demontant, Guillaume Gricourt, Melissa N'Debi, Alexandre Soulier, Elisabeth Trawinski, Jean-Michel Pawlotsky                                            |
| EPI_ISL_1085408                                   | C.H du Cotentin                                        | Department of Virology, Henri Mondor University Hospital, Assistance Publique Hôpitaux de Paris, Université Paris-Est Créteil, INSERM U955 | Christophe Rodriguez, Slim Fourati, Vanessa Demontant, Guillaume Gricourt, Melissa N'Debi, Alexandre Soulier, Elisabeth Trawinski, Jean-Michel Pawlotsky                                            |
| EPI_ISL_1085411                                   | CHU. COTE DE NACRE                                     | Department of Virology, Henri Mondor University Hospital, Assistance Publique Hôpitaux de Paris, Université Paris-Est Créteil, INSERM U955 | Christophe Rodriguez, Slim Fourati, Vanessa Demontant, Guillaume Gricourt, Melissa N'Debi, Alexandre Soulier, Elisabeth Trawinski, Jean-Michel Pawlotsky                                            |
| EPI_ISL_1085414                                   | CHI VILLENEUVE ST GEORGES                              | Department of Virology, Henri Mondor University Hospital, Assistance Publique Hôpitaux de Paris, Université Paris-Est Créteil, INSERM U955 | Christophe Rodriguez, Slim Fourati, Vanessa Demontant, Guillaume Gricourt, Melissa N'Debi, Alexandre Soulier, Elisabeth Trawinski, Jean-Michel Pawlotsky                                            |
| EPI_ISL_1085415                                   | CH. E. MULLER                                          | Department of Virology, Henri Mondor University Hospital, Assistance Publique Hôpitaux de Paris, Université Paris-Est Créteil, INSERM U955 | Christophe Rodriguez, Slim Fourati, Vanessa Demontant, Guillaume Gricourt, Melissa N'Debi, Alexandre Soulier, Elisabeth Trawinski, Jean-Michel Pawlotsky                                            |
| EPI_ISL_1085416                                   | E.F.S B.F.C JEAN MINJOZ                                | Department of Virology, Henri Mondor University Hospital, Assistance Publique Hôpitaux de Paris, Université Paris-Est Créteil, INSERM U955 | Christophe Rodriguez, Slim Fourati, Vanessa Demontant, Guillaume Gricourt, Melissa N'Debi, Alexandre Soulier, Elisabeth Trawinski, Jean-Michel Pawlotsky                                            |
| EPI_ISL_1085418                                   | CH. BEGIN                                              | Department of Virology, Henri Mondor University Hospital, Assistance Publique Hôpitaux de Paris, Université Paris-Est Créteil, INSERM U955 | Christophe Rodriguez, Slim Fourati, Vanessa Demontant, Guillaume Gricourt, Melissa N'Debi, Alexandre Soulier, Elisabeth Trawinski, Jean-Michel Pawlotsky                                            |
| EPI_ISL_1085419                                   | E.F.S B.F.C JEAN MINJOZ                                | Department of Virology, Henri Mondor University Hospital, Assistance Publique Hôpitaux de Paris, Université Paris-Est Créteil, INSERM U955 | Christophe Rodriguez, Slim Fourati, Vanessa Demontant, Guillaume Gricourt, Melissa N'Debi, Alexandre Soulier, Elisabeth Trawinski, Jean-Michel Pawlotsky                                            |
| EPI_ISL_1085420                                   | CHI VILLENEUVE ST GEORGES                              | Department of Virology, Henri Mondor University Hospital, Assistance Publique Hôpitaux de Paris, Université Paris-Est Créteil, INSERM U955 | Christophe Rodriguez, Slim Fourati, Vanessa Demontant, Guillaume Gricourt, Melissa N'Debi, Alexandre Soulier, Elisabeth Trawinski, Jean-Michel Pawlotsky                                            |
| EPI_ISL_1085421                                   | Instituto Nacional de Medicina Genomica                | Instituto Nacional de Medicina Genomica                                                                                                    | Hidalgo-Miranda A, Mendoza-Vargas A, Reyes-Grajeda JP, Cedro-Tanda A, Alcaraz N, Gonzalez-Barrera D, Rangel-DeLeon D, Ramirez-Vega O, Sifuentes-Rojas C, Cisneros-Villanueva M, Herrera-Montalvo LA |
| EPI_ISL_1085459                                   | Groupe LCD                                             | Department of Virology, Henri Mondor University Hospital, Assistance Publique Hôpitaux de Paris, Université Paris-Est Créteil, INSERM U955 | Christophe Rodriguez, Slim Fourati, Vanessa Demontant, Guillaume Gricourt, Melissa N'Debi, Alexandre Soulier, Elisabeth Trawinski, Jean-Michel Pawlotsky                                            |
| EPI_ISL_1085519, EPI_ISL_1085521, EPI_ISL_1085522 | CH. DE LILLE                                           | Department of Virology, Henri Mondor University Hospital, Assistance Publique Hôpitaux de Paris, Université Paris-Est Créteil, INSERM U955 | Christophe Rodriguez, Slim Fourati, Vanessa Demontant, Guillaume Gricourt, Melissa N'Debi, Alexandre Soulier, Elisabeth Trawinski, Jean-Michel Pawlotsky                                            |
| EPI_ISL_1085535, EPI_ISL_1085536                  | CHI VILLENEUVE ST GEORGES                              | Department of Virology, Henri Mondor University Hospital, Assistance Publique Hôpitaux de Paris, Université Paris-Est Créteil, INSERM U955 | Christophe Rodriguez, Slim Fourati, Vanessa Demontant, Guillaume Gricourt, Melissa N'Debi, Alexandre Soulier, Elisabeth Trawinski, Jean-Michel Pawlotsky                                            |
| EPI_ISL_1085541                                   | Hôpital Henri Mondor                                   | Department of Virology, Henri Mondor University Hospital, Assistance Publique Hôpitaux de Paris, Université Paris-Est Créteil, INSERM U955 | Christophe Rodriguez, Slim Fourati, Vanessa Demontant, Guillaume Gricourt, Melissa N'Debi, Alexandre Soulier, Elisabeth Trawinski, Jean-Michel Pawlotsky                                            |
| EPI_ISL_1085543, EPI_ISL_1085548                  | CHI VILLENEUVE ST GEORGES                              | Department of Virology, Henri Mondor University Hospital, Assistance Publique Hôpitaux de Paris, Université Paris-Est Créteil, INSERM U955 | Christophe Rodriguez, Slim Fourati, Vanessa Demontant, Guillaume Gricourt, Melissa N'Debi, Alexandre Soulier, Elisabeth Trawinski, Jean-Michel Pawlotsky                                            |
| EPI_ISL_1085550, EPI_ISL_1085551                  | CH.INTERCOMMUNAL DE CRETEIL                            | Department of Virology, Henri Mondor University Hospital, Assistance Publique Hôpitaux de Paris, Université Paris-Est Créteil, INSERM U955 | Christophe Rodriguez, Slim Fourati, Vanessa Demontant, Guillaume Gricourt, Melissa N'Debi, Alexandre Soulier, Elisabeth Trawinski, Jean-Michel Pawlotsky                                            |
| EPI_ISL_1085593                                   | Hôpital Henri Mondor                                   | Department of Virology, Henri Mondor University Hospital, Assistance Publique Hôpitaux de Paris, Université Paris-Est Créteil, INSERM U955 | Christophe Rodriguez, Slim Fourati, Vanessa Demontant, Guillaume Gricourt, Melissa N'Debi, Alexandre Soulier, Elisabeth Trawinski, Jean-Michel Pawlotsky                                            |
| EPI_ISL_1085645                                   | CH.INTERCOMMUNAL DE CRETEIL                            | Department of Virology, Henri Mondor University Hospital, Assistance Publique Hôpitaux de Paris, Université Paris-Est                      | Christophe Rodriguez, Slim Fourati, Vanessa Demontant, Guillaume Gricourt, Melissa N'Debi, Alexandre Soulier, Elisabeth Trawinski, Jean-Michel Pawlotsky                                            |

|                                                                                                                                                                                                                                                                                                                                                                                                                                                                                                                                                                                                                                                                                                                                                                                                                                                                                                                                                                                                                                                                                                                                                                                                                                                                                                                                                                                                                                                                                                                                                                                                                                                                                                                                     |                                        |                                                                                                                                            |                                                                                                                                                          |
|-------------------------------------------------------------------------------------------------------------------------------------------------------------------------------------------------------------------------------------------------------------------------------------------------------------------------------------------------------------------------------------------------------------------------------------------------------------------------------------------------------------------------------------------------------------------------------------------------------------------------------------------------------------------------------------------------------------------------------------------------------------------------------------------------------------------------------------------------------------------------------------------------------------------------------------------------------------------------------------------------------------------------------------------------------------------------------------------------------------------------------------------------------------------------------------------------------------------------------------------------------------------------------------------------------------------------------------------------------------------------------------------------------------------------------------------------------------------------------------------------------------------------------------------------------------------------------------------------------------------------------------------------------------------------------------------------------------------------------------|----------------------------------------|--------------------------------------------------------------------------------------------------------------------------------------------|----------------------------------------------------------------------------------------------------------------------------------------------------------|
|                                                                                                                                                                                                                                                                                                                                                                                                                                                                                                                                                                                                                                                                                                                                                                                                                                                                                                                                                                                                                                                                                                                                                                                                                                                                                                                                                                                                                                                                                                                                                                                                                                                                                                                                     |                                        | Créteil, INSERM U955                                                                                                                       |                                                                                                                                                          |
| EPI_ISL_1085646, EPI_ISL_1085647, EPI_ISL_1085648, EPI_ISL_1085650, EPI_ISL_1085651                                                                                                                                                                                                                                                                                                                                                                                                                                                                                                                                                                                                                                                                                                                                                                                                                                                                                                                                                                                                                                                                                                                                                                                                                                                                                                                                                                                                                                                                                                                                                                                                                                                 | Hôpital Henri Mondor                   | Department of Virology, Henri Mondor University Hospital, Assistance Publique Hôpitaux de Paris, Université Paris-Est Créteil, INSERM U955 | Christophe Rodriguez, Slim Fourati, Vanessa Demontant, Guillaume Gricourt, Melissa N'Debi, Alexandre Soulier, Elisabeth Trawinski, Jean-Michel Pawlotsky |
| EPI_ISL_1085652                                                                                                                                                                                                                                                                                                                                                                                                                                                                                                                                                                                                                                                                                                                                                                                                                                                                                                                                                                                                                                                                                                                                                                                                                                                                                                                                                                                                                                                                                                                                                                                                                                                                                                                     | CH.INTERCOMMUNAL DE CRETEIL            | Department of Virology, Henri Mondor University Hospital, Assistance Publique Hôpitaux de Paris, Université Paris-Est Créteil, INSERM U955 | Christophe Rodriguez, Slim Fourati, Vanessa Demontant, Guillaume Gricourt, Melissa N'Debi, Alexandre Soulier, Elisabeth Trawinski, Jean-Michel Pawlotsky |
| EPI_ISL_1085653, EPI_ISL_1085654                                                                                                                                                                                                                                                                                                                                                                                                                                                                                                                                                                                                                                                                                                                                                                                                                                                                                                                                                                                                                                                                                                                                                                                                                                                                                                                                                                                                                                                                                                                                                                                                                                                                                                    | CHI VILLENEUVE ST GEORGES              | Department of Virology, Henri Mondor University Hospital, Assistance Publique Hôpitaux de Paris, Université Paris-Est Créteil, INSERM U955 | Christophe Rodriguez, Slim Fourati, Vanessa Demontant, Guillaume Gricourt, Melissa N'Debi, Alexandre Soulier, Elisabeth Trawinski, Jean-Michel Pawlotsky |
| EPI_ISL_1085655, EPI_ISL_1085656, EPI_ISL_1085658, EPI_ISL_1085660                                                                                                                                                                                                                                                                                                                                                                                                                                                                                                                                                                                                                                                                                                                                                                                                                                                                                                                                                                                                                                                                                                                                                                                                                                                                                                                                                                                                                                                                                                                                                                                                                                                                  | Hôpital Henri Mondor                   | Department of Virology, Henri Mondor University Hospital, Assistance Publique Hôpitaux de Paris, Université Paris-Est Créteil, INSERM U955 | Christophe Rodriguez, Slim Fourati, Vanessa Demontant, Guillaume Gricourt, Melissa N'Debi, Alexandre Soulier, Elisabeth Trawinski, Jean-Michel Pawlotsky |
| EPI_ISL_1085662                                                                                                                                                                                                                                                                                                                                                                                                                                                                                                                                                                                                                                                                                                                                                                                                                                                                                                                                                                                                                                                                                                                                                                                                                                                                                                                                                                                                                                                                                                                                                                                                                                                                                                                     | CH.INTERCOMMUNAL DE CRETEIL            | Department of Virology, Henri Mondor University Hospital, Assistance Publique Hôpitaux de Paris, Université Paris-Est Créteil, INSERM U955 | Christophe Rodriguez, Slim Fourati, Vanessa Demontant, Guillaume Gricourt, Melissa N'Debi, Alexandre Soulier, Elisabeth Trawinski, Jean-Michel Pawlotsky |
| EPI_ISL_1085664, EPI_ISL_1085665, EPI_ISL_1085666, EPI_ISL_1085667, EPI_ISL_1085668, EPI_ISL_1085669, EPI_ISL_1085670, EPI_ISL_1085725, EPI_ISL_1085726, EPI_ISL_1085733, EPI_ISL_1085734, EPI_ISL_1085735, EPI_ISL_1085786, EPI_ISL_1085787, EPI_ISL_1085789, EPI_ISL_1085812, EPI_ISL_1085813, EPI_ISL_1085814                                                                                                                                                                                                                                                                                                                                                                                                                                                                                                                                                                                                                                                                                                                                                                                                                                                                                                                                                                                                                                                                                                                                                                                                                                                                                                                                                                                                                    |                                        |                                                                                                                                            |                                                                                                                                                          |
| see above                                                                                                                                                                                                                                                                                                                                                                                                                                                                                                                                                                                                                                                                                                                                                                                                                                                                                                                                                                                                                                                                                                                                                                                                                                                                                                                                                                                                                                                                                                                                                                                                                                                                                                                           | Hôpital Henri Mondor                   | Department of Virology, Henri Mondor University Hospital, Assistance Publique Hôpitaux de Paris, Université Paris-Est Créteil, INSERM U955 | Christophe Rodriguez, Slim Fourati, Vanessa Demontant, Guillaume Gricourt, Melissa N'Debi, Alexandre Soulier, Elisabeth Trawinski, Jean-Michel Pawlotsky |
| EPI_ISL_1085916                                                                                                                                                                                                                                                                                                                                                                                                                                                                                                                                                                                                                                                                                                                                                                                                                                                                                                                                                                                                                                                                                                                                                                                                                                                                                                                                                                                                                                                                                                                                                                                                                                                                                                                     | Hôpital Armand-Trousseau               | Department of Virology, Henri Mondor University Hospital, Assistance Publique Hôpitaux de Paris, Université Paris-Est Créteil, INSERM U955 | Christophe Rodriguez, Slim Fourati, Vanessa Demontant, Guillaume Gricourt, Melissa N'Debi, Alexandre Soulier, Elisabeth Trawinski, Jean-Michel Pawlotsky |
| EPI_ISL_1085922, EPI_ISL_1085924                                                                                                                                                                                                                                                                                                                                                                                                                                                                                                                                                                                                                                                                                                                                                                                                                                                                                                                                                                                                                                                                                                                                                                                                                                                                                                                                                                                                                                                                                                                                                                                                                                                                                                    | Hôpital Ambroise-Paré                  | Department of Virology, Henri Mondor University Hospital, Assistance Publique Hôpitaux de Paris, Université Paris-Est Créteil, INSERM U955 | Christophe Rodriguez, Slim Fourati, Vanessa Demontant, Guillaume Gricourt, Melissa N'Debi, Alexandre Soulier, Elisabeth Trawinski, Jean-Michel Pawlotsky |
| EPI_ISL_1085925, EPI_ISL_1085927                                                                                                                                                                                                                                                                                                                                                                                                                                                                                                                                                                                                                                                                                                                                                                                                                                                                                                                                                                                                                                                                                                                                                                                                                                                                                                                                                                                                                                                                                                                                                                                                                                                                                                    | Hôpital Avicenne                       | Department of Virology, Henri Mondor University Hospital, Assistance Publique Hôpitaux de Paris, Université Paris-Est Créteil, INSERM U955 | Christophe Rodriguez, Slim Fourati, Vanessa Demontant, Guillaume Gricourt, Melissa N'Debi, Alexandre Soulier, Elisabeth Trawinski, Jean-Michel Pawlotsky |
| EPI_ISL_1085929                                                                                                                                                                                                                                                                                                                                                                                                                                                                                                                                                                                                                                                                                                                                                                                                                                                                                                                                                                                                                                                                                                                                                                                                                                                                                                                                                                                                                                                                                                                                                                                                                                                                                                                     | Hôpital Henri Mondor                   | Department of Virology, Henri Mondor University Hospital, Assistance Publique Hôpitaux de Paris, Université Paris-Est Créteil, INSERM U955 | Christophe Rodriguez, Slim Fourati, Vanessa Demontant, Guillaume Gricourt, Melissa N'Debi, Alexandre Soulier, Elisabeth Trawinski, Jean-Michel Pawlotsky |
| EPI_ISL_1085930                                                                                                                                                                                                                                                                                                                                                                                                                                                                                                                                                                                                                                                                                                                                                                                                                                                                                                                                                                                                                                                                                                                                                                                                                                                                                                                                                                                                                                                                                                                                                                                                                                                                                                                     | SELAS BC-LAB                           | Department of Virology, Henri Mondor University Hospital, Assistance Publique Hôpitaux de Paris, Université Paris-Est Créteil, INSERM U955 | Christophe Rodriguez, Slim Fourati, Vanessa Demontant, Guillaume Gricourt, Melissa N'Debi, Alexandre Soulier, Elisabeth Trawinski, Jean-Michel Pawlotsky |
| EPI_ISL_1085932                                                                                                                                                                                                                                                                                                                                                                                                                                                                                                                                                                                                                                                                                                                                                                                                                                                                                                                                                                                                                                                                                                                                                                                                                                                                                                                                                                                                                                                                                                                                                                                                                                                                                                                     | CH.de LONS LE SAUNIER                  | Department of Virology, Henri Mondor University Hospital, Assistance Publique Hôpitaux de Paris, Université Paris-Est Créteil, INSERM U955 | Christophe Rodriguez, Slim Fourati, Vanessa Demontant, Guillaume Gricourt, Melissa N'Debi, Alexandre Soulier, Elisabeth Trawinski, Jean-Michel Pawlotsky |
| EPI_ISL_1085933                                                                                                                                                                                                                                                                                                                                                                                                                                                                                                                                                                                                                                                                                                                                                                                                                                                                                                                                                                                                                                                                                                                                                                                                                                                                                                                                                                                                                                                                                                                                                                                                                                                                                                                     | LBM NEVERS                             | Department of Virology, Henri Mondor University Hospital, Assistance Publique Hôpitaux de Paris, Université Paris-Est Créteil, INSERM U955 | Christophe Rodriguez, Slim Fourati, Vanessa Demontant, Guillaume Gricourt, Melissa N'Debi, Alexandre Soulier, Elisabeth Trawinski, Jean-Michel Pawlotsky |
| EPI_ISL_1085934, EPI_ISL_1085935                                                                                                                                                                                                                                                                                                                                                                                                                                                                                                                                                                                                                                                                                                                                                                                                                                                                                                                                                                                                                                                                                                                                                                                                                                                                                                                                                                                                                                                                                                                                                                                                                                                                                                    | Besançon Laboratoire CBM25 Terre Rouge | Department of Virology, Henri Mondor University Hospital, Assistance Publique Hôpitaux de Paris, Université Paris-Est Créteil, INSERM U955 | Christophe Rodriguez, Slim Fourati, Vanessa Demontant, Guillaume Gricourt, Melissa N'Debi, Alexandre Soulier, Elisabeth Trawinski, Jean-Michel Pawlotsky |
| EPI_ISL_1085936                                                                                                                                                                                                                                                                                                                                                                                                                                                                                                                                                                                                                                                                                                                                                                                                                                                                                                                                                                                                                                                                                                                                                                                                                                                                                                                                                                                                                                                                                                                                                                                                                                                                                                                     | Hôpital Bichat-Claude Bernard          | Department of Virology, Henri Mondor University Hospital, Assistance Publique Hôpitaux de Paris, Université Paris-Est Créteil, INSERM U955 | Christophe Rodriguez, Slim Fourati, Vanessa Demontant, Guillaume Gricourt, Melissa N'Debi, Alexandre Soulier, Elisabeth Trawinski, Jean-Michel Pawlotsky |
| EPI_ISL_1085937                                                                                                                                                                                                                                                                                                                                                                                                                                                                                                                                                                                                                                                                                                                                                                                                                                                                                                                                                                                                                                                                                                                                                                                                                                                                                                                                                                                                                                                                                                                                                                                                                                                                                                                     | Hôpital Saint-Louis                    | Department of Virology, Henri Mondor University Hospital, Assistance Publique Hôpitaux de Paris, Université Paris-Est Créteil, INSERM U955 | Christophe Rodriguez, Slim Fourati, Vanessa Demontant, Guillaume Gricourt, Melissa N'Debi, Alexandre Soulier, Elisabeth Trawinski, Jean-Michel Pawlotsky |
| EPI_ISL_1085938, EPI_ISL_1085939, EPI_ISL_1085940                                                                                                                                                                                                                                                                                                                                                                                                                                                                                                                                                                                                                                                                                                                                                                                                                                                                                                                                                                                                                                                                                                                                                                                                                                                                                                                                                                                                                                                                                                                                                                                                                                                                                   | CH. CHU DE REIMS                       | Department of Virology, Henri Mondor University Hospital, Assistance Publique Hôpitaux de Paris, Université Paris-Est Créteil, INSERM U955 | Christophe Rodriguez, Slim Fourati, Vanessa Demontant, Guillaume Gricourt, Melissa N'Debi, Alexandre Soulier, Elisabeth Trawinski, Jean-Michel Pawlotsky |
| EPI_ISL_1085941, EPI_ISL_1085942, EPI_ISL_1085943, EPI_ISL_1085944                                                                                                                                                                                                                                                                                                                                                                                                                                                                                                                                                                                                                                                                                                                                                                                                                                                                                                                                                                                                                                                                                                                                                                                                                                                                                                                                                                                                                                                                                                                                                                                                                                                                  | Hôpital Henri Mondor                   | Department of Virology, Henri Mondor University Hospital, Assistance Publique Hôpitaux de Paris, Université Paris-Est Créteil, INSERM U955 | Christophe Rodriguez, Slim Fourati, Vanessa Demontant, Guillaume Gricourt, Melissa N'Debi, Alexandre Soulier, Elisabeth Trawinski, Jean-Michel Pawlotsky |
| EPI_ISL_1085947                                                                                                                                                                                                                                                                                                                                                                                                                                                                                                                                                                                                                                                                                                                                                                                                                                                                                                                                                                                                                                                                                                                                                                                                                                                                                                                                                                                                                                                                                                                                                                                                                                                                                                                     | Hôpital Armand-Trousseau               | Department of Virology, Henri Mondor University Hospital, Assistance Publique Hôpitaux de Paris, Université Paris-Est Créteil, INSERM U955 | Christophe Rodriguez, Slim Fourati, Vanessa Demontant, Guillaume Gricourt, Melissa N'Debi, Alexandre Soulier, Elisabeth Trawinski, Jean-Michel Pawlotsky |
| EPI_ISL_1086050, EPI_ISL_1086051, EPI_ISL_1086055, EPI_ISL_1086056                                                                                                                                                                                                                                                                                                                                                                                                                                                                                                                                                                                                                                                                                                                                                                                                                                                                                                                                                                                                                                                                                                                                                                                                                                                                                                                                                                                                                                                                                                                                                                                                                                                                  | IAL Regional de Bauru                  | Instituto Adolfo Lutz, Interdisciplinary Procedures Center, Strategic Laboratory                                                           | Claudio Tavares Sacchi, Claudia Regina Gonçalves, Erica Valessa Ramos Gomes, Karoline Rodrigues Campos, Caio Vinicius Dias Lopes                         |
| EPI_ISL_1086409, EPI_ISL_1086552, EPI_ISL_1086560, EPI_ISL_1086569, EPI_ISL_1086572, EPI_ISL_1086573, EPI_ISL_1086575, EPI_ISL_1086588, EPI_ISL_1086592, EPI_ISL_1086597, EPI_ISL_1086618, EPI_ISL_1086626, EPI_ISL_1086634, EPI_ISL_1086639, EPI_ISL_1086641, EPI_ISL_1086650, EPI_ISL_1086659, EPI_ISL_1086661, EPI_ISL_1086664, EPI_ISL_1087414, EPI_ISL_1087417, EPI_ISL_1087418, EPI_ISL_1087419, EPI_ISL_1087421, EPI_ISL_1087423, EPI_ISL_1087424, EPI_ISL_1087425, EPI_ISL_1087426, EPI_ISL_1087427, EPI_ISL_1087428, EPI_ISL_1087429, EPI_ISL_1087430, EPI_ISL_1087431, EPI_ISL_1087432, EPI_ISL_1087433, EPI_ISL_1087434, EPI_ISL_1087435, EPI_ISL_1087437, EPI_ISL_1087439, EPI_ISL_1087441, EPI_ISL_1087447, EPI_ISL_1087449, EPI_ISL_1087450, EPI_ISL_1087452, EPI_ISL_1087453, EPI_ISL_1087455, EPI_ISL_1087456, EPI_ISL_1087457, EPI_ISL_1087458, EPI_ISL_1087459, EPI_ISL_1087460, EPI_ISL_1087461, EPI_ISL_1087462, EPI_ISL_1087463, EPI_ISL_1087464, EPI_ISL_1087468, EPI_ISL_1087471, EPI_ISL_1087472, EPI_ISL_1087473, EPI_ISL_1087474, EPI_ISL_1087475, EPI_ISL_1087477, EPI_ISL_1087479, EPI_ISL_1087480, EPI_ISL_1087481, EPI_ISL_1087482, EPI_ISL_1087484, EPI_ISL_1087487, EPI_ISL_1087488, EPI_ISL_1087489, EPI_ISL_1087491, EPI_ISL_1087492, EPI_ISL_1087493, EPI_ISL_1087494, EPI_ISL_1087495, EPI_ISL_1087497, EPI_ISL_1087498, EPI_ISL_1087499, EPI_ISL_1087500, EPI_ISL_1087501, EPI_ISL_1087502, EPI_ISL_1087503, EPI_ISL_1087505, EPI_ISL_1087507, EPI_ISL_1087508, EPI_ISL_1087509, EPI_ISL_1087510, EPI_ISL_1087511, EPI_ISL_1087519, EPI_ISL_1087520, EPI_ISL_1087523, EPI_ISL_1087526, EPI_ISL_1087527, EPI_ISL_1087528, EPI_ISL_1087529, EPI_ISL_1087531, EPI_ISL_1087532, EPI_ISL_1087534, E |                                        |                                                                                                                                            |                                                                                                                                                          |







|                                                                                                                                                                                                                                                                                                                                                                                                                                                                                                                                                                                                                                                                                                                                                                                                                                                                                                                                                                                                                                                                             |                                                                                                                   |                                                                                                    |                                                                                                                                                                                                                                                                          |
|-----------------------------------------------------------------------------------------------------------------------------------------------------------------------------------------------------------------------------------------------------------------------------------------------------------------------------------------------------------------------------------------------------------------------------------------------------------------------------------------------------------------------------------------------------------------------------------------------------------------------------------------------------------------------------------------------------------------------------------------------------------------------------------------------------------------------------------------------------------------------------------------------------------------------------------------------------------------------------------------------------------------------------------------------------------------------------|-------------------------------------------------------------------------------------------------------------------|----------------------------------------------------------------------------------------------------|--------------------------------------------------------------------------------------------------------------------------------------------------------------------------------------------------------------------------------------------------------------------------|
| EPI_ISL_1094721, EPI_ISL_1094722                                                                                                                                                                                                                                                                                                                                                                                                                                                                                                                                                                                                                                                                                                                                                                                                                                                                                                                                                                                                                                            | NV State Public Health Laboratory                                                                                 | Respiratory Viruses Branch, Division of Viral Diseases, Centers for Disease Control and Prevention | Krista Queen, Yan Li, Ying Tao, Jing Zhang, Anna Uehara, Anna Montmayeur, Clinton R. Paden, Peter W. Cook, Rachel Marine, Mili Sheth, Jasmine Padilla, Sarah Nobles, Mark Burroughs, Lori Rowe, Haibin Wang, Ben L. Rambo-Martin, Dhwani Batra, Justin Lee, Suxiang Tong |
| EPI_ISL_1094731, EPI_ISL_1094733                                                                                                                                                                                                                                                                                                                                                                                                                                                                                                                                                                                                                                                                                                                                                                                                                                                                                                                                                                                                                                            | OR State PHL-Virology/Immunology Section                                                                          | Respiratory Viruses Branch, Division of Viral Diseases, Centers for Disease Control and Prevention | Krista Queen, Yan Li, Ying Tao, Jing Zhang, Anna Uehara, Anna Montmayeur, Clinton R. Paden, Peter W. Cook, Rachel Marine, Mili Sheth, Jasmine Padilla, Sarah Nobles, Mark Burroughs, Lori Rowe, Haibin Wang, Ben L. Rambo-Martin, Dhwani Batra, Justin Lee, Suxiang Tong |
| EPI_ISL_1094756, EPI_ISL_1094757, EPI_ISL_1094766, EPI_ISL_1094767                                                                                                                                                                                                                                                                                                                                                                                                                                                                                                                                                                                                                                                                                                                                                                                                                                                                                                                                                                                                          | WA State Department of Health                                                                                     | Respiratory Viruses Branch, Division of Viral Diseases, Centers for Disease Control and Prevention | Krista Queen, Yan Li, Ying Tao, Jing Zhang, Anna Uehara, Anna Montmayeur, Clinton R. Paden, Peter W. Cook, Rachel Marine, Mili Sheth, Jasmine Padilla, Sarah Nobles, Mark Burroughs, Lori Rowe, Haibin Wang, Ben L. Rambo-Martin, Dhwani Batra, Justin Lee, Suxiang Tong |
| EPI_ISL_1094884, EPI_ISL_1094886                                                                                                                                                                                                                                                                                                                                                                                                                                                                                                                                                                                                                                                                                                                                                                                                                                                                                                                                                                                                                                            | LA Office of Public Health Laboratories                                                                           | Respiratory Viruses Branch, Division of Viral Diseases, Centers for Disease Control and Prevention | Krista Queen, Yan Li, Ying Tao, Jing Zhang, Anna Uehara, Anna Montmayeur, Clinton R. Paden, Peter W. Cook, Rachel Marine, Mili Sheth, Jasmine Padilla, Sarah Nobles, Mark Burroughs, Lori Rowe, Haibin Wang, Ben L. Rambo-Martin, Dhwani Batra, Justin Lee, Suxiang Tong |
| EPI_ISL_1095095                                                                                                                                                                                                                                                                                                                                                                                                                                                                                                                                                                                                                                                                                                                                                                                                                                                                                                                                                                                                                                                             | MI - Michigan Department of Health and Human Services - Bureau of Laboratories                                    | Respiratory Viruses Branch, Division of Viral Diseases, Centers for Disease Control and Prevention | Krista Queen, Yan Li, Ying Tao, Jing Zhang, Anna Uehara, Anna Montmayeur, Clinton R. Paden, Peter W. Cook, Rachel Marine, Mili Sheth, Jasmine Padilla, Sarah Nobles, Mark Burroughs, Lori Rowe, Haibin Wang, Ben L. Rambo-Martin, Dhwani Batra, Justin Lee, Suxiang Tong |
| EPI_ISL_1095205, EPI_ISL_1095206, EPI_ISL_1095207, EPI_ISL_1095208                                                                                                                                                                                                                                                                                                                                                                                                                                                                                                                                                                                                                                                                                                                                                                                                                                                                                                                                                                                                          | WI State Laboratory of Hygiene                                                                                    | Respiratory Viruses Branch, Division of Viral Diseases, Centers for Disease Control and Prevention | Krista Queen, Yan Li, Ying Tao, Jing Zhang, Anna Uehara, Anna Montmayeur, Clinton R. Paden, Peter W. Cook, Rachel Marine, Mili Sheth, Jasmine Padilla, Sarah Nobles, Mark Burroughs, Lori Rowe, Haibin Wang, Ben L. Rambo-Martin, Dhwani Batra, Justin Lee, Suxiang Tong |
| EPI_ISL_1095307, EPI_ISL_1095308, EPI_ISL_1095309, EPI_ISL_1095310, EPI_ISL_1095311, EPI_ISL_1095312, EPI_ISL_1095313, EPI_ISL_1095315                                                                                                                                                                                                                                                                                                                                                                                                                                                                                                                                                                                                                                                                                                                                                                                                                                                                                                                                      | SC Dept of Health and Env. Control-Bureau of Laboratories                                                         | Respiratory Viruses Branch, Division of Viral Diseases, Centers for Disease Control and Prevention | Krista Queen, Yan Li, Ying Tao, Jing Zhang, Anna Uehara, Anna Montmayeur, Clinton R. Paden, Peter W. Cook, Rachel Marine, Mili Sheth, Jasmine Padilla, Sarah Nobles, Mark Burroughs, Lori Rowe, Haibin Wang, Ben L. Rambo-Martin, Dhwani Batra, Justin Lee, Suxiang Tong |
| EPI_ISL_1095376                                                                                                                                                                                                                                                                                                                                                                                                                                                                                                                                                                                                                                                                                                                                                                                                                                                                                                                                                                                                                                                             | Istituto Zooprofilattico Sperimentale del Mezzogiorno                                                             | Lab. Microbiologia e Virologia, Cotugno, A.O. dei Colli                                            | Luigi Atripaldi, Claudia Tiberio, Anna Perfetti, Pellegrino Cerino, Biancamaria Pierri, Maria Concetta Cuomo                                                                                                                                                             |
| EPI_ISL_1095384                                                                                                                                                                                                                                                                                                                                                                                                                                                                                                                                                                                                                                                                                                                                                                                                                                                                                                                                                                                                                                                             | Laboratorio Microbiologia e Virologia P.O. Cotugno A.O. dei Colli                                                 | Laboratorio Microbiologia e Virologia P.O. Cotugno A.O. dei Colli                                  | Luigi Atripaldi, Claudia Tiberio, Anna Perfetti, Pellegrino Cerino, Biancamaria Pierri, Maria Concetta Cuomo                                                                                                                                                             |
| EPI_ISL_1095386, EPI_ISL_1095393, EPI_ISL_1095401, EPI_ISL_1095405, EPI_ISL_1095406                                                                                                                                                                                                                                                                                                                                                                                                                                                                                                                                                                                                                                                                                                                                                                                                                                                                                                                                                                                         | Istituto Zooprofilattico Sperimentale del Mezzogiorno                                                             | Lab. Microbiologia e Virologia, Cotugno, A.O. dei Colli                                            | Luigi Atripaldi, Claudia Tiberio, Anna Perfetti, Pellegrino Cerino, Biancamaria Pierri, Maria Concetta Cuomo                                                                                                                                                             |
| EPI_ISL_1095408, EPI_ISL_1095409, EPI_ISL_1095410, EPI_ISL_1095411, EPI_ISL_1095412, EPI_ISL_1095413, EPI_ISL_1095414, EPI_ISL_1095415, EPI_ISL_1095417, EPI_ISL_1095418, EPI_ISL_1095419, EPI_ISL_1095420, EPI_ISL_1095421, EPI_ISL_1095423, EPI_ISL_1095424, EPI_ISL_1095427, EPI_ISL_1095429, EPI_ISL_1095434, EPI_ISL_1095438, EPI_ISL_1095445, EPI_ISL_1095446, EPI_ISL_1095447, EPI_ISL_1095448                                                                                                                                                                                                                                                                                                                                                                                                                                                                                                                                                                                                                                                                       | see above                                                                                                         | see above                                                                                          | see above                                                                                                                                                                                                                                                                |
| EPI_ISL_1095496, EPI_ISL_1095498, EPI_ISL_1095499, EPI_ISL_1095500, EPI_ISL_1095501, EPI_ISL_1095503, EPI_ISL_1095504, EPI_ISL_1095505, EPI_ISL_1095506, EPI_ISL_1095507, EPI_ISL_1095508, EPI_ISL_1095509, EPI_ISL_1095510, EPI_ISL_1095511, EPI_ISL_1095512, EPI_ISL_1095513, EPI_ISL_1095514, EPI_ISL_1095515                                                                                                                                                                                                                                                                                                                                                                                                                                                                                                                                                                                                                                                                                                                                                            | see above                                                                                                         | see above                                                                                          | see above                                                                                                                                                                                                                                                                |
| EPI_ISL_1095519, EPI_ISL_1095520, EPI_ISL_1095521, EPI_ISL_1095525, EPI_ISL_1095527, EPI_ISL_1095529, EPI_ISL_1095530, EPI_ISL_1095532, EPI_ISL_1095535, EPI_ISL_1095536, EPI_ISL_1095537, EPI_ISL_1095540, EPI_ISL_1095544, EPI_ISL_1095546, EPI_ISL_1095548, EPI_ISL_1095549, EPI_ISL_1095551, EPI_ISL_1095552, EPI_ISL_1095553, EPI_ISL_1095557, EPI_ISL_1095560, EPI_ISL_1095562, EPI_ISL_1095563, EPI_ISL_1095564, EPI_ISL_1095565, EPI_ISL_1095566, EPI_ISL_1095568, EPI_ISL_1095573, EPI_ISL_1095574, EPI_ISL_1095575, EPI_ISL_1095576, EPI_ISL_1095577, EPI_ISL_1095578, EPI_ISL_1095579, EPI_ISL_1095580, EPI_ISL_1095581, EPI_ISL_1095582, EPI_ISL_1095583, EPI_ISL_1095584, EPI_ISL_1095586, EPI_ISL_1095587, EPI_ISL_1095588, EPI_ISL_1095589, EPI_ISL_1095590, EPI_ISL_1095591, EPI_ISL_1095592, EPI_ISL_1095593, EPI_ISL_1095594, EPI_ISL_1095595, EPI_ISL_1095597, EPI_ISL_1095598, EPI_ISL_1095600, EPI_ISL_1095601, EPI_ISL_1095602, EPI_ISL_1095603, EPI_ISL_1095604, EPI_ISL_1095605, EPI_ISL_1095606, EPI_ISL_1095607, EPI_ISL_1095608, EPI_ISL_1095609 | see above                                                                                                         | see above                                                                                          | see above                                                                                                                                                                                                                                                                |
| EPI_ISL_1096033, EPI_ISL_1096035, EPI_ISL_1096043, EPI_ISL_1096044, EPI_ISL_1096047, EPI_ISL_1096049, EPI_ISL_1096054, EPI_ISL_1096060, EPI_ISL_1096061, EPI_ISL_1096069, EPI_ISL_1096070, EPI_ISL_1096072, EPI_ISL_1096073, EPI_ISL_1096075, EPI_ISL_1096079, EPI_ISL_1096081, EPI_ISL_1096082, EPI_ISL_1096084, EPI_ISL_1096090, EPI_ISL_1096093, EPI_ISL_1096094, EPI_ISL_1096095, EPI_ISL_1096104, EPI_ISL_1096105, EPI_ISL_1096108, EPI_ISL_1096111                                                                                                                                                                                                                                                                                                                                                                                                                                                                                                                                                                                                                    | see above                                                                                                         | see above                                                                                          | see above                                                                                                                                                                                                                                                                |
| EPI_ISL_1096126, EPI_ISL_1096128, EPI_ISL_1096129, EPI_ISL_1096130, EPI_ISL_1096133                                                                                                                                                                                                                                                                                                                                                                                                                                                                                                                                                                                                                                                                                                                                                                                                                                                                                                                                                                                         | see above                                                                                                         | see above                                                                                          | see above                                                                                                                                                                                                                                                                |
| EPI_ISL_1096137, EPI_ISL_1096138                                                                                                                                                                                                                                                                                                                                                                                                                                                                                                                                                                                                                                                                                                                                                                                                                                                                                                                                                                                                                                            | Ohio State University Wexner Medical Center                                                                       | James Molecular Laboratory                                                                         | Huolin Tu, Pamela Snyder, Zachary Rudy, Sara Koenig, Saran Corcoran, Keelie Thomas, Preeti Pancholi, Dan Jones                                                                                                                                                           |
| EPI_ISL_1096156, EPI_ISL_1096157, EPI_ISL_1096159, EPI_ISL_1096160, EPI_ISL_1096161, EPI_ISL_1096162, EPI_ISL_1096163, EPI_ISL_1096164, EPI_ISL_1096165, EPI_ISL_1096166                                                                                                                                                                                                                                                                                                                                                                                                                                                                                                                                                                                                                                                                                                                                                                                                                                                                                                    | Hematology Laboratory, Section of Molecular Diagnostics, University Clinical Centre, Medical University of Gdansk | Laboratory of Recombinant Vaccines                                                                 | Lukasz Rabalski, Maciej Kosinski, Adam Sodol, Aneta Szulc, Krzysztof Lewandowski, Ewa Milosz, Marlena Robakowska, Boguslaw Szewczyk, Krystyna Bienkowska-Szewczyk                                                                                                        |
| EPI_ISL_1096168, EPI_ISL_1096169                                                                                                                                                                                                                                                                                                                                                                                                                                                                                                                                                                                                                                                                                                                                                                                                                                                                                                                                                                                                                                            | Medical Laboratory Bruss                                                                                          | Laboratory of Recombinant Vaccines                                                                 | Lukasz Rabalski, Maciej Kosinski, Maciej Grzybek, Pawel Pisarek, Boguslaw Szewczyk, Krystyna Bienkowska-Szewczyk                                                                                                                                                         |
| EPI_ISL_1096170, EPI_ISL_1096171, EPI_ISL_1096172, EPI_ISL_1096173, EPI_ISL_1096174, EPI_ISL_1096175, EPI_ISL_1096176, EPI_ISL_1096177, EPI_ISL_1096178, EPI_ISL_1096179, EPI_ISL_1096180, EPI_ISL_1096181, EPI_ISL_1096182, EPI_ISL_1096183, EPI_ISL_1096184, EPI_ISL_1096185, EPI_ISL_1096186, EPI_ISL_1096187, EPI_ISL_1096188, EPI_ISL_1096189, EPI_ISL_1096190, EPI_ISL_1096191, EPI_ISL_1096192, EPI_ISL_1096193, EPI_ISL_1096194, EPI_ISL_1096195                                                                                                                                                                                                                                                                                                                                                                                                                                                                                                                                                                                                                    | see above                                                                                                         | see above                                                                                          | see above                                                                                                                                                                                                                                                                |
| EPI_ISL_1096196, EPI_ISL_1096197, EPI_ISL_1096198                                                                                                                                                                                                                                                                                                                                                                                                                                                                                                                                                                                                                                                                                                                                                                                                                                                                                                                                                                                                                           | Hematology Laboratory, Section of Molecular Diagnostics, University Clinical Centre, Medical University of Gdansk | Laboratory of Recombinant Vaccines                                                                 | Lukasz Rabalski, Maciej Kosinski, Adam Sodol, Aneta Szulc, Krzysztof Lewandowski, Ewa Milosz, Marlena Robakowska, Boguslaw Szewczyk, Krystyna Bienkowska-Szewczyk                                                                                                        |
| EPI_ISL_1096204, EPI_ISL_1096205, EPI_ISL_1096206, EPI_ISL_1096207, EPI_ISL_1096208, EPI_ISL_1096209                                                                                                                                                                                                                                                                                                                                                                                                                                                                                                                                                                                                                                                                                                                                                                                                                                                                                                                                                                        | Medical Laboratory Bruss                                                                                          | Laboratory of Recombinant Vaccines                                                                 | Lukasz Rabalski, Maciej Kosinski, Maciej Grzybek, Pawel Pisarek, Boguslaw Szewczyk, Krystyna Bienkowska-Szewczyk                                                                                                                                                         |
| EPI_ISL_1096210, EPI_ISL_1096211, EPI_ISL_1096212, EPI_ISL_1096214                                                                                                                                                                                                                                                                                                                                                                                                                                                                                                                                                                                                                                                                                                                                                                                                                                                                                                                                                                                                          | Hematology Laboratory, Section of Molecular Diagnostics, University Clinical Centre, Medical University of Gdansk | Laboratory of Recombinant Vaccines                                                                 | Lukasz Rabalski, Maciej Kosinski, Adam Sodol, Aneta Szulc, Krzysztof Lewandowski, Ewa Milosz, Marlena Robakowska, Boguslaw Szewczyk, Krystyna Bienkowska-Szewczyk                                                                                                        |
| EPI_ISL_1096216, EPI_ISL_1096217, EPI_ISL_1096219, EPI_ISL_1096220, EPI_ISL_1096221, EPI_ISL_1096225, EPI_ISL_1096226, EPI_ISL_1096227                                                                                                                                                                                                                                                                                                                                                                                                                                                                                                                                                                                                                                                                                                                                                                                                                                                                                                                                      | Medical Laboratory Bruss                                                                                          | Laboratory of Recombinant Vaccines                                                                 | Lukasz Rabalski, Maciej Kosinski, Maciej Grzybek, Pawel Pisarek, Boguslaw Szewczyk, Krystyna Bienkowska-Szewczyk                                                                                                                                                         |
| EPI_ISL_1096229, EPI_ISL_1096232                                                                                                                                                                                                                                                                                                                                                                                                                                                                                                                                                                                                                                                                                                                                                                                                                                                                                                                                                                                                                                            | National Virus Reference Laboratory                                                                               | National Virus Reference Laboratory                                                                | Zoe Yandle, Charlene Bennet, Gabriel Gonzalez, Michael Carr, Jonathan Dean, Cillian F De Gascun                                                                                                                                                                          |
| EPI_ISL_1096234, EPI_ISL_1096235                                                                                                                                                                                                                                                                                                                                                                                                                                                                                                                                                                                                                                                                                                                                                                                                                                                                                                                                                                                                                                            | Laboratorio Microbiologia e Virologia P.O. Cotugno A.O. dei Colli                                                 | Laboratorio Microbiologia e Virologia P.O. Cotugno A.O. dei Colli                                  | Luigi Atripaldi, Claudia Tiberio, Anna Perfetti, Pellegrino Cerino, Biancamaria Pierri, Maria Concetta Cuomo                                                                                                                                                             |
| EPI_ISL_1096236, EPI_ISL_1096237, EPI_ISL_1096238, EPI_ISL_1096239, EPI_ISL_1096240, EPI_ISL_1096241                                                                                                                                                                                                                                                                                                                                                                                                                                                                                                                                                                                                                                                                                                                                                                                                                                                                                                                                                                        | Outre mer                                                                                                         | National Reference Center for Viruses of Respiratory Infections, Institut Pasteur, Paris           | Marion Barbet, Sylvie Behillil, Méline Bizard, Angela Brisebarre, Camille Capel, Etienne Simon-Lorière, Vincent Enouf, Maud Vanpeene, Sylvie van der Werf, Rousset Dominique                                                                                             |
|                                                                                                                                                                                                                                                                                                                                                                                                                                                                                                                                                                                                                                                                                                                                                                                                                                                                                                                                                                                                                                                                             | Research                                                                                                          | National Reference Center for Viruses of Respiratory Infections, Institut Pasteur, Paris           | Marion Barbet, Sylvie Behillil, Méline Bizard, Angela Brisebarre, Camille Capel, Etienne Simon-Lorière, Vincent Enouf, Maud Vanpeene, Sylvie van der Werf, Leruez-Ville Marianne                                                                                         |

|                                                                                                                                                                                                                                                                                                                                                                                                                                                                                                                                                                                                                                                                                                                                                                                                                                                                                                                                                                                                                                                                                                                                                                                                                                                                                                                                                                                                                                                                                                                                                                                                                                                                                                                                                                                                                                                                                                                                                                                                                                                    |                                                                                  |                                                                                          |                                                                                                                                                                                 |                                                                     |
|----------------------------------------------------------------------------------------------------------------------------------------------------------------------------------------------------------------------------------------------------------------------------------------------------------------------------------------------------------------------------------------------------------------------------------------------------------------------------------------------------------------------------------------------------------------------------------------------------------------------------------------------------------------------------------------------------------------------------------------------------------------------------------------------------------------------------------------------------------------------------------------------------------------------------------------------------------------------------------------------------------------------------------------------------------------------------------------------------------------------------------------------------------------------------------------------------------------------------------------------------------------------------------------------------------------------------------------------------------------------------------------------------------------------------------------------------------------------------------------------------------------------------------------------------------------------------------------------------------------------------------------------------------------------------------------------------------------------------------------------------------------------------------------------------------------------------------------------------------------------------------------------------------------------------------------------------------------------------------------------------------------------------------------------------|----------------------------------------------------------------------------------|------------------------------------------------------------------------------------------|---------------------------------------------------------------------------------------------------------------------------------------------------------------------------------|---------------------------------------------------------------------|
| EPI_ISL_1096242                                                                                                                                                                                                                                                                                                                                                                                                                                                                                                                                                                                                                                                                                                                                                                                                                                                                                                                                                                                                                                                                                                                                                                                                                                                                                                                                                                                                                                                                                                                                                                                                                                                                                                                                                                                                                                                                                                                                                                                                                                    | Hopital                                                                          | National Reference Center for Viruses of Respiratory Infections, Institut Pasteur, Paris | Marion Barbet, Sylvie Behillil, Méline Bizard, Angela Brisebarre, Camille Capel, Etienne Simon-Lorière, Vincent Enouf, Maud Vanpeene, Sylvie van der Werf,Martres Pascale       |                                                                     |
| EPI_ISL_1096243                                                                                                                                                                                                                                                                                                                                                                                                                                                                                                                                                                                                                                                                                                                                                                                                                                                                                                                                                                                                                                                                                                                                                                                                                                                                                                                                                                                                                                                                                                                                                                                                                                                                                                                                                                                                                                                                                                                                                                                                                                    | Labo Analyses Med                                                                | National Reference Center for Viruses of Respiratory Infections, Institut Pasteur, Paris | Marion Barbet, Sylvie Behillil, Méline Bizard, Angela Brisebarre, Camille Capel, Etienne Simon-Lorière, Vincent Enouf, Maud Vanpeene, Sylvie van der Werf,Martres Pascale       |                                                                     |
| EPI_ISL_1096244                                                                                                                                                                                                                                                                                                                                                                                                                                                                                                                                                                                                                                                                                                                                                                                                                                                                                                                                                                                                                                                                                                                                                                                                                                                                                                                                                                                                                                                                                                                                                                                                                                                                                                                                                                                                                                                                                                                                                                                                                                    | Hopital                                                                          | National Reference Center for Viruses of Respiratory Infections, Institut Pasteur, Paris | Marion Barbet, Sylvie Behillil, Méline Bizard, Angela Brisebarre, Camille Capel, Etienne Simon-Lorière, Vincent Enouf, Maud Vanpeene, Sylvie van der Werf,Martres Pascale       |                                                                     |
| EPI_ISL_1096245, EPI_ISL_1096246                                                                                                                                                                                                                                                                                                                                                                                                                                                                                                                                                                                                                                                                                                                                                                                                                                                                                                                                                                                                                                                                                                                                                                                                                                                                                                                                                                                                                                                                                                                                                                                                                                                                                                                                                                                                                                                                                                                                                                                                                   | Hopital                                                                          | National Reference Center for Viruses of Respiratory Infections, Institut Pasteur, Paris | Marion Barbet, Sylvie Behillil, Méline Bizard, Angela Brisebarre, Camille Capel, Etienne Simon-Lorière, Vincent Enouf, Maud Vanpeene, Sylvie van der Werf,Cariou Marie-Estelle  |                                                                     |
| EPI_ISL_1096248                                                                                                                                                                                                                                                                                                                                                                                                                                                                                                                                                                                                                                                                                                                                                                                                                                                                                                                                                                                                                                                                                                                                                                                                                                                                                                                                                                                                                                                                                                                                                                                                                                                                                                                                                                                                                                                                                                                                                                                                                                    | Hopital                                                                          | National Reference Center for Viruses of Respiratory Infections, Institut Pasteur, Paris | Marion Barbet, Sylvie Behillil, Méline Bizard, Angela Brisebarre, Camille Capel, Etienne Simon-Lorière, Vincent Enouf, Maud Vanpeene, Sylvie van der Werf,Guinard Jérôme        |                                                                     |
| EPI_ISL_1096250, EPI_ISL_1096251, EPI_ISL_1096252                                                                                                                                                                                                                                                                                                                                                                                                                                                                                                                                                                                                                                                                                                                                                                                                                                                                                                                                                                                                                                                                                                                                                                                                                                                                                                                                                                                                                                                                                                                                                                                                                                                                                                                                                                                                                                                                                                                                                                                                  | Labo Analyses Med                                                                | National Reference Center for Viruses of Respiratory Infections, Institut Pasteur, Paris | Marion Barbet, Sylvie Behillil, Méline Bizard, Angela Brisebarre, Camille Capel, Etienne Simon-Lorière, Vincent Enouf, Maud Vanpeene, Sylvie van der Werf                       |                                                                     |
| EPI_ISL_1096253                                                                                                                                                                                                                                                                                                                                                                                                                                                                                                                                                                                                                                                                                                                                                                                                                                                                                                                                                                                                                                                                                                                                                                                                                                                                                                                                                                                                                                                                                                                                                                                                                                                                                                                                                                                                                                                                                                                                                                                                                                    | Hopital                                                                          | National Reference Center for Viruses of Respiratory Infections, Institut Pasteur, Paris | Marion Barbet, Sylvie Behillil, Méline Bizard, Angela Brisebarre, Camille Capel, Etienne Simon-Lorière, Vincent Enouf, Maud Vanpeene, Sylvie van der Werf,Hochart A             |                                                                     |
| EPI_ISL_1096254                                                                                                                                                                                                                                                                                                                                                                                                                                                                                                                                                                                                                                                                                                                                                                                                                                                                                                                                                                                                                                                                                                                                                                                                                                                                                                                                                                                                                                                                                                                                                                                                                                                                                                                                                                                                                                                                                                                                                                                                                                    | Hopital                                                                          | National Reference Center for Viruses of Respiratory Infections, Institut Pasteur, Paris | Marion Barbet, Sylvie Behillil, Méline Bizard, Angela Brisebarre, Camille Capel, Etienne Simon-Lorière, Vincent Enouf, Maud Vanpeene, Sylvie van der Werf,Bisiau H              |                                                                     |
| EPI_ISL_1096255, EPI_ISL_1096256                                                                                                                                                                                                                                                                                                                                                                                                                                                                                                                                                                                                                                                                                                                                                                                                                                                                                                                                                                                                                                                                                                                                                                                                                                                                                                                                                                                                                                                                                                                                                                                                                                                                                                                                                                                                                                                                                                                                                                                                                   | Hopital                                                                          | National Reference Center for Viruses of Respiratory Infections, Institut Pasteur, Paris | Marion Barbet, Sylvie Behillil, Méline Bizard, Angela Brisebarre, Camille Capel, Etienne Simon-Lorière, Vincent Enouf, Maud Vanpeene, Sylvie van der Werf,Farfour Eric          |                                                                     |
| EPI_ISL_1096259                                                                                                                                                                                                                                                                                                                                                                                                                                                                                                                                                                                                                                                                                                                                                                                                                                                                                                                                                                                                                                                                                                                                                                                                                                                                                                                                                                                                                                                                                                                                                                                                                                                                                                                                                                                                                                                                                                                                                                                                                                    | Hopital                                                                          | National Reference Center for Viruses of Respiratory Infections, Institut Pasteur, Paris | Marion Barbet, Sylvie Behillil, Méline Bizard, Angela Brisebarre, Camille Capel, Etienne Simon-Lorière, Vincent Enouf, Maud Vanpeene, Sylvie van der Werf,Castelain Sandrine    |                                                                     |
| EPI_ISL_1096263, EPI_ISL_1096267                                                                                                                                                                                                                                                                                                                                                                                                                                                                                                                                                                                                                                                                                                                                                                                                                                                                                                                                                                                                                                                                                                                                                                                                                                                                                                                                                                                                                                                                                                                                                                                                                                                                                                                                                                                                                                                                                                                                                                                                                   | Research                                                                         | National Reference Center for Viruses of Respiratory Infections, Institut Pasteur, Paris | Marion Barbet, Sylvie Behillil, Méline Bizard, Angela Brisebarre, Camille Capel, Etienne Simon-Lorière, Vincent Enouf, Maud Vanpeene, Sylvie van der Werf,Leruez-Ville Marianne |                                                                     |
| EPI_ISL_1096268                                                                                                                                                                                                                                                                                                                                                                                                                                                                                                                                                                                                                                                                                                                                                                                                                                                                                                                                                                                                                                                                                                                                                                                                                                                                                                                                                                                                                                                                                                                                                                                                                                                                                                                                                                                                                                                                                                                                                                                                                                    | Labo Analyses Med                                                                | National Reference Center for Viruses of Respiratory Infections, Institut Pasteur, Paris | Marion Barbet, Sylvie Behillil, Méline Bizard, Angela Brisebarre, Camille Capel, Etienne Simon-Lorière, Vincent Enouf, Maud Vanpeene, Sylvie van der Werf,Coignard Catherine    |                                                                     |
| EPI_ISL_1096273                                                                                                                                                                                                                                                                                                                                                                                                                                                                                                                                                                                                                                                                                                                                                                                                                                                                                                                                                                                                                                                                                                                                                                                                                                                                                                                                                                                                                                                                                                                                                                                                                                                                                                                                                                                                                                                                                                                                                                                                                                    | Hopital                                                                          | National Reference Center for Viruses of Respiratory Infections, Institut Pasteur, Paris | Marion Barbet, Sylvie Behillil, Méline Bizard, Angela Brisebarre, Camille Capel, Etienne Simon-Lorière, Vincent Enouf, Maud Vanpeene, Sylvie van der Werf,Cariou Marie-Estelle  |                                                                     |
| EPI_ISL_1096274                                                                                                                                                                                                                                                                                                                                                                                                                                                                                                                                                                                                                                                                                                                                                                                                                                                                                                                                                                                                                                                                                                                                                                                                                                                                                                                                                                                                                                                                                                                                                                                                                                                                                                                                                                                                                                                                                                                                                                                                                                    | Research                                                                         | National Reference Center for Viruses of Respiratory Infections, Institut Pasteur, Paris | Marion Barbet, Sylvie Behillil, Méline Bizard, Angela Brisebarre, Camille Capel, Etienne Simon-Lorière, Vincent Enouf, Maud Vanpeene, Sylvie van der Werf,Leruez-Ville Marianne |                                                                     |
| EPI_ISL_1096275                                                                                                                                                                                                                                                                                                                                                                                                                                                                                                                                                                                                                                                                                                                                                                                                                                                                                                                                                                                                                                                                                                                                                                                                                                                                                                                                                                                                                                                                                                                                                                                                                                                                                                                                                                                                                                                                                                                                                                                                                                    | Hopital                                                                          | National Reference Center for Viruses of Respiratory Infections, Institut Pasteur, Paris | Marion Barbet, Sylvie Behillil, Méline Bizard, Angela Brisebarre, Camille Capel, Etienne Simon-Lorière, Vincent Enouf, Maud Vanpeene, Sylvie van der Werf,Lagathu Gisèle        |                                                                     |
| EPI_ISL_1096276, EPI_ISL_1096277                                                                                                                                                                                                                                                                                                                                                                                                                                                                                                                                                                                                                                                                                                                                                                                                                                                                                                                                                                                                                                                                                                                                                                                                                                                                                                                                                                                                                                                                                                                                                                                                                                                                                                                                                                                                                                                                                                                                                                                                                   | Hopital                                                                          | National Reference Center for Viruses of Respiratory Infections, Institut Pasteur, Paris | Marion Barbet, Sylvie Behillil, Méline Bizard, Angela Brisebarre, Camille Capel, Etienne Simon-Lorière, Vincent Enouf, Maud Vanpeene, Sylvie van der Werf,Cariou Marie-Estelle  |                                                                     |
| EPI_ISL_1096281, EPI_ISL_1096290, EPI_ISL_1096296, EPI_ISL_1096298, EPI_ISL_1096300, EPI_ISL_1096301, EPI_ISL_1096302                                                                                                                                                                                                                                                                                                                                                                                                                                                                                                                                                                                                                                                                                                                                                                                                                                                                                                                                                                                                                                                                                                                                                                                                                                                                                                                                                                                                                                                                                                                                                                                                                                                                                                                                                                                                                                                                                                                              | Hopital                                                                          | National Reference Center for Viruses of Respiratory Infections, Institut Pasteur, Paris | Marion Barbet, Sylvie Behillil, Méline Bizard, Angela Brisebarre, Camille Capel, Etienne Simon-Lorière, Vincent Enouf, Maud Vanpeene, Sylvie van der Werf,Guinard Jérôme        |                                                                     |
| EPI_ISL_1096303                                                                                                                                                                                                                                                                                                                                                                                                                                                                                                                                                                                                                                                                                                                                                                                                                                                                                                                                                                                                                                                                                                                                                                                                                                                                                                                                                                                                                                                                                                                                                                                                                                                                                                                                                                                                                                                                                                                                                                                                                                    | Labo Analyses Med                                                                | National Reference Center for Viruses of Respiratory Infections, Institut Pasteur, Paris | Marion Barbet, Sylvie Behillil, Méline Bizard, Angela Brisebarre, Camille Capel, Etienne Simon-Lorière, Vincent Enouf, Maud Vanpeene, Sylvie van der Werf                       |                                                                     |
| EPI_ISL_1096305, EPI_ISL_1096306, EPI_ISL_1096307, EPI_ISL_1096308                                                                                                                                                                                                                                                                                                                                                                                                                                                                                                                                                                                                                                                                                                                                                                                                                                                                                                                                                                                                                                                                                                                                                                                                                                                                                                                                                                                                                                                                                                                                                                                                                                                                                                                                                                                                                                                                                                                                                                                 | Hopital                                                                          | National Reference Center for Viruses of Respiratory Infections, Institut Pasteur, Paris | Marion Barbet, Sylvie Behillil, Méline Bizard, Angela Brisebarre, Camille Capel, Etienne Simon-Lorière, Vincent Enouf, Maud Vanpeene, Sylvie van der Werf,Castelain Sandrine    |                                                                     |
| EPI_ISL_1096309, EPI_ISL_1096310, EPI_ISL_1096311, EPI_ISL_1096312                                                                                                                                                                                                                                                                                                                                                                                                                                                                                                                                                                                                                                                                                                                                                                                                                                                                                                                                                                                                                                                                                                                                                                                                                                                                                                                                                                                                                                                                                                                                                                                                                                                                                                                                                                                                                                                                                                                                                                                 | Hopital                                                                          | National Reference Center for Viruses of Respiratory Infections, Institut Pasteur, Paris | Marion Barbet, Sylvie Behillil, Méline Bizard, Angela Brisebarre, Camille Capel, Etienne Simon-Lorière, Vincent Enouf, Maud Vanpeene, Sylvie van der Werf,Hochart A             |                                                                     |
| EPI_ISL_1096313, EPI_ISL_1096314, EPI_ISL_1096315, EPI_ISL_1096316                                                                                                                                                                                                                                                                                                                                                                                                                                                                                                                                                                                                                                                                                                                                                                                                                                                                                                                                                                                                                                                                                                                                                                                                                                                                                                                                                                                                                                                                                                                                                                                                                                                                                                                                                                                                                                                                                                                                                                                 | Labo Analyses Med                                                                | National Reference Center for Viruses of Respiratory Infections, Institut Pasteur, Paris | Marion Barbet, Sylvie Behillil, Méline Bizard, Angela Brisebarre, Camille Capel, Etienne Simon-Lorière, Vincent Enouf, Maud Vanpeene, Sylvie van der Werf,Fiorina Jc            |                                                                     |
| EPI_ISL_1096317, EPI_ISL_1096318, EPI_ISL_1096320                                                                                                                                                                                                                                                                                                                                                                                                                                                                                                                                                                                                                                                                                                                                                                                                                                                                                                                                                                                                                                                                                                                                                                                                                                                                                                                                                                                                                                                                                                                                                                                                                                                                                                                                                                                                                                                                                                                                                                                                  | Hopital                                                                          | National Reference Center for Viruses of Respiratory Infections, Institut Pasteur, Paris | Marion Barbet, Sylvie Behillil, Méline Bizard, Angela Brisebarre, Camille Capel, Etienne Simon-Lorière, Vincent Enouf, Maud Vanpeene, Sylvie van der Werf,Bisiau H              |                                                                     |
| EPI_ISL_1096329, EPI_ISL_1096330, EPI_ISL_1096332, EPI_ISL_1096333                                                                                                                                                                                                                                                                                                                                                                                                                                                                                                                                                                                                                                                                                                                                                                                                                                                                                                                                                                                                                                                                                                                                                                                                                                                                                                                                                                                                                                                                                                                                                                                                                                                                                                                                                                                                                                                                                                                                                                                 | Research                                                                         | National Reference Center for Viruses of Respiratory Infections, Institut Pasteur, Paris | Marion Barbet, Sylvie Behillil, Méline Bizard, Angela Brisebarre, Camille Capel, Etienne Simon-Lorière, Vincent Enouf, Maud Vanpeene, Sylvie van der Werf,Leruez-Ville Marianne |                                                                     |
| EPI_ISL_1096334                                                                                                                                                                                                                                                                                                                                                                                                                                                                                                                                                                                                                                                                                                                                                                                                                                                                                                                                                                                                                                                                                                                                                                                                                                                                                                                                                                                                                                                                                                                                                                                                                                                                                                                                                                                                                                                                                                                                                                                                                                    | Hopital                                                                          | National Reference Center for Viruses of Respiratory Infections, Institut Pasteur, Paris | Marion Barbet, Sylvie Behillil, Méline Bizard, Angela Brisebarre, Camille Capel, Etienne Simon-Lorière, Vincent Enouf, Maud Vanpeene, Sylvie van der Werf,LefeuvreCaroline      |                                                                     |
| EPI_ISL_1096347, EPI_ISL_1096348                                                                                                                                                                                                                                                                                                                                                                                                                                                                                                                                                                                                                                                                                                                                                                                                                                                                                                                                                                                                                                                                                                                                                                                                                                                                                                                                                                                                                                                                                                                                                                                                                                                                                                                                                                                                                                                                                                                                                                                                                   | Cambodian National Public Health Laboratory, National Institute of Public Health | Virology Unit, Institut Pasteur du Cambodge                                              | Sokhoun Yann, Ly Sovann, Kraing Sidonn, Yi Sengdoeurm, Chin Savuth, Chau Darapheap, Veasna Duong, Erik A Karlsson                                                               |                                                                     |
| EPI_ISL_1096982, EPI_ISL_1096991, EPI_ISL_1096996, EPI_ISL_1096998, EPI_ISL_1097004, EPI_ISL_1097005, EPI_ISL_1097008, EPI_ISL_1097009, EPI_ISL_1097010, EPI_ISL_1097011, EPI_ISL_1097012, EPI_ISL_1097013, EPI_ISL_1097015                                                                                                                                                                                                                                                                                                                                                                                                                                                                                                                                                                                                                                                                                                                                                                                                                                                                                                                                                                                                                                                                                                                                                                                                                                                                                                                                                                                                                                                                                                                                                                                                                                                                                                                                                                                                                        | see above                                                                        | Laboratorio Microbiologia e Virologia P.O. Cotugno A.O. dei Colli                        | Luigi Atripaldi, Claudia Tiberio, Anna Perfetti, Pellegrino Cerino, Biancamaria Pierri, Maria Concetta Cuomo                                                                    |                                                                     |
| EPI_ISL_1097016                                                                                                                                                                                                                                                                                                                                                                                                                                                                                                                                                                                                                                                                                                                                                                                                                                                                                                                                                                                                                                                                                                                                                                                                                                                                                                                                                                                                                                                                                                                                                                                                                                                                                                                                                                                                                                                                                                                                                                                                                                    | Laboratorio Microbiologia e Virologia P.O. Cotugno A.O. dei Colli                | Laboratorio Microbiologia e Virologia P.O. Cotugno A.O. dei Colli                        | Luigi Atripaldi, Claudia Tiberio, Anna Perfetti, Pellegrino Cerino, Biancamaria Pierri, Maria Concetta Cuomo                                                                    |                                                                     |
| EPI_ISL_1097017                                                                                                                                                                                                                                                                                                                                                                                                                                                                                                                                                                                                                                                                                                                                                                                                                                                                                                                                                                                                                                                                                                                                                                                                                                                                                                                                                                                                                                                                                                                                                                                                                                                                                                                                                                                                                                                                                                                                                                                                                                    | Laboratorio Microbiologia e Virologia P.O. Cotugno A.O. dei Colli                | Laboratorio Microbiologia e Virologia P.O. Cotugno A.O. dei Colli                        | Luigi Atripaldi, Claudia Tiberio, Anna Perfetti, Pellegrino Cerino, Biancamaria Pierri, Maria Concetta Cuomo                                                                    |                                                                     |
| EPI_ISL_1097018                                                                                                                                                                                                                                                                                                                                                                                                                                                                                                                                                                                                                                                                                                                                                                                                                                                                                                                                                                                                                                                                                                                                                                                                                                                                                                                                                                                                                                                                                                                                                                                                                                                                                                                                                                                                                                                                                                                                                                                                                                    | Baylor Scott & White-Temple                                                      | Baylor Scott & White-Temple                                                              | Ari Rao, Linden Morales, Kimberly Walker, Marcus Volz, Shelby Hendrickson                                                                                                       |                                                                     |
| EPI_ISL_1097019, EPI_ISL_1097021, EPI_ISL_1097022                                                                                                                                                                                                                                                                                                                                                                                                                                                                                                                                                                                                                                                                                                                                                                                                                                                                                                                                                                                                                                                                                                                                                                                                                                                                                                                                                                                                                                                                                                                                                                                                                                                                                                                                                                                                                                                                                                                                                                                                  | Laboratorio Microbiologia e Virologia P.O. Cotugno A.O. dei Colli                | Laboratorio Microbiologia e Virologia P.O. Cotugno A.O. dei Colli                        | Luigi Atripaldi, Claudia Tiberio, Anna Perfetti, Pellegrino Cerino, Biancamaria Pierri, Maria Concetta Cuomo                                                                    |                                                                     |
| EPI_ISL_1097040, EPI_ISL_1097041, EPI_ISL_1097042, EPI_ISL_1097043, EPI_ISL_1097044, EPI_ISL_1097045, EPI_ISL_1097046, EPI_ISL_1097051, EPI_ISL_1097056, EPI_ISL_1097057, EPI_ISL_1097058, EPI_ISL_1097059, EPI_ISL_1097071, EPI_ISL_1097074, EPI_ISL_1097077, EPI_ISL_1097078, EPI_ISL_1097080, EPI_ISL_1097082, EPI_ISL_1097083, EPI_ISL_1097085, EPI_ISL_1097087, EPI_ISL_1097088, EPI_ISL_1097089, EPI_ISL_1097090, EPI_ISL_1097095, EPI_ISL_1097097, EPI_ISL_1097099, EPI_ISL_1097100, EPI_ISL_1097103, EPI_ISL_1097105, EPI_ISL_1097106, EPI_ISL_1097109, EPI_ISL_1097110, EPI_ISL_1097111, EPI_ISL_1097113, EPI_ISL_1097114, EPI_ISL_1097115, EPI_ISL_1097116, EPI_ISL_1097117, EPI_ISL_1097118, EPI_ISL_1097119, EPI_ISL_1097120, EPI_ISL_1097121, EPI_ISL_1097122, EPI_ISL_1097124, EPI_ISL_1097169, EPI_ISL_1097173, EPI_ISL_1097182, EPI_ISL_1097183, EPI_ISL_1097204, EPI_ISL_1097207, EPI_ISL_1097208, EPI_ISL_1097213, EPI_ISL_1097216, EPI_ISL_1097217, EPI_ISL_1097218, EPI_ISL_1097219, EPI_ISL_1097220, EPI_ISL_1097221, EPI_ISL_1097230, EPI_ISL_1097232, EPI_ISL_1097233, EPI_ISL_1097234, EPI_ISL_1097235, EPI_ISL_1097236, EPI_ISL_1097237, EPI_ISL_1097238, EPI_ISL_1097239, EPI_ISL_1097243, EPI_ISL_1097244, EPI_ISL_1097245, EPI_ISL_1097246, EPI_ISL_1097247, EPI_ISL_1097249, EPI_ISL_1097250, EPI_ISL_1097251, EPI_ISL_1097252, EPI_ISL_1097253, EPI_ISL_1097254, EPI_ISL_1097255, EPI_ISL_1097256, EPI_ISL_1097258, EPI_ISL_1097259, EPI_ISL_1097260, EPI_ISL_1097261, EPI_ISL_1097262, EPI_ISL_1097264, EPI_ISL_1097265, EPI_ISL_1097266, EPI_ISL_1097268, EPI_ISL_1097269, EPI_ISL_1097270, EPI_ISL_1097271, EPI_ISL_1097272, EPI_ISL_1097275, EPI_ISL_1097276, EPI_ISL_1097277, EPI_ISL_1097278, EPI_ISL_1097279, EPI_ISL_1097280, EPI_ISL_1097281, EPI_ISL_1097282, EPI_ISL_1097283, EPI_ISL_1097285, EPI_ISL_1097286, EPI_ISL_1097288, EPI_ISL_1097289, EPI_ISL_1097291, EPI_ISL_1097292, EPI_ISL_1097293, EPI_ISL_1097294, EPI_ISL_1097295, EPI_ISL_1097297, EPI_ISL_1097300, EPI_ISL_1097303, EPI_ISL_1097304 | see above                                                                        | Ministry of Health Turkey                                                                | Ministry of Health Turkey                                                                                                                                                       | Fatma Bayraktar, Yasemin Cosgun, Suleyman Yalcin, Gulay Korukluoglu |
| EPI_ISL_1097525, EPI_ISL_1097526, EPI_ISL_1097533, EPI_ISL_1097534, EPI_ISL_1097535, EPI_ISL_1097544, EPI_ISL_1097546, EPI_ISL_1097548, EPI_ISL_1097554, EPI_ISL_1097558, EPI_ISL_1097559, EPI_ISL_1097560, EPI_ISL_1097563, EPI_ISL_1097564, EPI_ISL_1097581, EPI_ISL_1097596, EPI_ISL_1097625                                                                                                                                                                                                                                                                                                                                                                                                                                                                                                                                                                                                                                                                                                                                                                                                                                                                                                                                                                                                                                                                                                                                                                                                                                                                                                                                                                                                                                                                                                                                                                                                                                                                                                                                                    |                                                                                  |                                                                                          |                                                                                                                                                                                 |                                                                     |



























[illegible]











[illegible]

[illegible]

[illegible]

[illegible]

[illegible]

[illegible]

[illegible]

[illegible]





[illegible]



[illegible]

[illegible]

[illegible]



[illegible]



[illegible]

[illegible]

[illegible]

[illegible]

[illegible]









|                                                                                                                                                                                                                                                                                                                                                                                                                                                                                                                                                                                                                                                                                                                                                                                                                                                                                                                                                                                                                                                                                                                                |                                                           |                                                                                                                                            |                                                                                                                                                                                                                                                                   |  |
|--------------------------------------------------------------------------------------------------------------------------------------------------------------------------------------------------------------------------------------------------------------------------------------------------------------------------------------------------------------------------------------------------------------------------------------------------------------------------------------------------------------------------------------------------------------------------------------------------------------------------------------------------------------------------------------------------------------------------------------------------------------------------------------------------------------------------------------------------------------------------------------------------------------------------------------------------------------------------------------------------------------------------------------------------------------------------------------------------------------------------------|-----------------------------------------------------------|--------------------------------------------------------------------------------------------------------------------------------------------|-------------------------------------------------------------------------------------------------------------------------------------------------------------------------------------------------------------------------------------------------------------------|--|
| Foundation Trust/Department of Infection, Immunity and Cardiovascular Disease, The Medical School, University of Sheffield                                                                                                                                                                                                                                                                                                                                                                                                                                                                                                                                                                                                                                                                                                                                                                                                                                                                                                                                                                                                     |                                                           | Laura Carrilero, Alex Keeley, Dave Partridge, Matthew Wyles, Benjamin Lindsey, Mehmet Yavuz, Mohammad Raza, Cariad Evans                   |                                                                                                                                                                                                                                                                   |  |
| EPI_ISL_1109392                                                                                                                                                                                                                                                                                                                                                                                                                                                                                                                                                                                                                                                                                                                                                                                                                                                                                                                                                                                                                                                                                                                | AZ Klina                                                  | AZ Klina                                                                                                                                   | Dr. C. Vael                                                                                                                                                                                                                                                       |  |
| EPI_ISL_1109490, EPI_ISL_1109491                                                                                                                                                                                                                                                                                                                                                                                                                                                                                                                                                                                                                                                                                                                                                                                                                                                                                                                                                                                                                                                                                               | Public Health Institute of Šibenik-Knin County            | Croatian Institute of Public Health                                                                                                        | Irena Tabain, Ivana Ferenak                                                                                                                                                                                                                                       |  |
| EPI_ISL_1109492, EPI_ISL_1109493, EPI_ISL_1109494                                                                                                                                                                                                                                                                                                                                                                                                                                                                                                                                                                                                                                                                                                                                                                                                                                                                                                                                                                                                                                                                              | University Hospital for Infectious Diseases               | Croatian Institute of Public Health                                                                                                        | Irena Tabain, Ivana Ferenak                                                                                                                                                                                                                                       |  |
| EPI_ISL_1109495, EPI_ISL_1109496, EPI_ISL_1109498, EPI_ISL_1109499                                                                                                                                                                                                                                                                                                                                                                                                                                                                                                                                                                                                                                                                                                                                                                                                                                                                                                                                                                                                                                                             | Croatian Institute of Public Health                       | Croatian Institute of Public Health                                                                                                        | Irena Tabain, Ivana Ferenak                                                                                                                                                                                                                                       |  |
| EPI_ISL_1109506, EPI_ISL_1109507                                                                                                                                                                                                                                                                                                                                                                                                                                                                                                                                                                                                                                                                                                                                                                                                                                                                                                                                                                                                                                                                                               | University Hospital for Infectious Diseases               | Croatian Institute of Public Health                                                                                                        | Irena Tabain, Ivana Ferenak                                                                                                                                                                                                                                       |  |
| EPI_ISL_1109508                                                                                                                                                                                                                                                                                                                                                                                                                                                                                                                                                                                                                                                                                                                                                                                                                                                                                                                                                                                                                                                                                                                | Public Health Institute of Meimurje County                | Croatian Institute of Public Health                                                                                                        | Irena Tabain, Ivana Ferenak                                                                                                                                                                                                                                       |  |
| EPI_ISL_1109509                                                                                                                                                                                                                                                                                                                                                                                                                                                                                                                                                                                                                                                                                                                                                                                                                                                                                                                                                                                                                                                                                                                | Public Health Institute of Šibenik-Knin County            | Croatian Institute of Public Health                                                                                                        | Irena Tabain, Ivana Ferenak                                                                                                                                                                                                                                       |  |
| EPI_ISL_1109510, EPI_ISL_1109511                                                                                                                                                                                                                                                                                                                                                                                                                                                                                                                                                                                                                                                                                                                                                                                                                                                                                                                                                                                                                                                                                               | Croatian Institute of Public Health                       | Croatian Institute of Public Health                                                                                                        | Irena Tabain, Ivana Ferenak                                                                                                                                                                                                                                       |  |
| EPI_ISL_1109530, EPI_ISL_1109534, EPI_ISL_1109535, EPI_ISL_1109536                                                                                                                                                                                                                                                                                                                                                                                                                                                                                                                                                                                                                                                                                                                                                                                                                                                                                                                                                                                                                                                             | University Hospital for Infectious Diseases               | Croatian Institute of Public Health                                                                                                        | Irena Tabain, Ivana Ferenak                                                                                                                                                                                                                                       |  |
| EPI_ISL_1109537, EPI_ISL_1109539                                                                                                                                                                                                                                                                                                                                                                                                                                                                                                                                                                                                                                                                                                                                                                                                                                                                                                                                                                                                                                                                                               | Croatian Institute of Public Health                       | Croatian Institute of Public Health                                                                                                        | Irena Tabain, Ivana Ferenak                                                                                                                                                                                                                                       |  |
| EPI_ISL_1109540, EPI_ISL_1109541, EPI_ISL_1109542, EPI_ISL_1109544, EPI_ISL_1109545, EPI_ISL_1109546                                                                                                                                                                                                                                                                                                                                                                                                                                                                                                                                                                                                                                                                                                                                                                                                                                                                                                                                                                                                                           | Public Health Institute of Šibenik-Knin County            | Croatian Institute of Public Health                                                                                                        | Irena Tabain, Ivana Ferenak                                                                                                                                                                                                                                       |  |
| EPI_ISL_1109548                                                                                                                                                                                                                                                                                                                                                                                                                                                                                                                                                                                                                                                                                                                                                                                                                                                                                                                                                                                                                                                                                                                | Croatian Institute of Public Health                       | Croatian Institute of Public Health                                                                                                        | Irena Tabain, Ivana Ferenak                                                                                                                                                                                                                                       |  |
| EPI_ISL_1109549, EPI_ISL_1109550, EPI_ISL_1109551, EPI_ISL_1109552                                                                                                                                                                                                                                                                                                                                                                                                                                                                                                                                                                                                                                                                                                                                                                                                                                                                                                                                                                                                                                                             | "Dr. Andrija Stampar" Teaching Institute of Public Health | Croatian Institute of Public Health                                                                                                        | Irena Tabain, Ivana Ferenak                                                                                                                                                                                                                                       |  |
| EPI_ISL_1109553, EPI_ISL_1109554                                                                                                                                                                                                                                                                                                                                                                                                                                                                                                                                                                                                                                                                                                                                                                                                                                                                                                                                                                                                                                                                                               | Croatian Institute of Public Health                       | Croatian Institute of Public Health                                                                                                        | Irena Tabain, Ivana Ferenak                                                                                                                                                                                                                                       |  |
| EPI_ISL_1109555, EPI_ISL_1109557                                                                                                                                                                                                                                                                                                                                                                                                                                                                                                                                                                                                                                                                                                                                                                                                                                                                                                                                                                                                                                                                                               | "Dr. Andrija Stampar" Teaching Institute of Public Health | Croatian Institute of Public Health                                                                                                        | Irena Tabain, Ivana Ferenak                                                                                                                                                                                                                                       |  |
| EPI_ISL_1109558, EPI_ISL_1109559, EPI_ISL_1109560, EPI_ISL_1109561, EPI_ISL_1109562                                                                                                                                                                                                                                                                                                                                                                                                                                                                                                                                                                                                                                                                                                                                                                                                                                                                                                                                                                                                                                            | University Hospital for Infectious Diseases               | Croatian Institute of Public Health                                                                                                        | Irena Tabain, Ivana Ferenak                                                                                                                                                                                                                                       |  |
| EPI_ISL_1109563                                                                                                                                                                                                                                                                                                                                                                                                                                                                                                                                                                                                                                                                                                                                                                                                                                                                                                                                                                                                                                                                                                                | Croatian Institute of Public Health                       | Croatian Institute of Public Health                                                                                                        | Irena Tabain, Ivana Ferenak                                                                                                                                                                                                                                       |  |
| EPI_ISL_1109564                                                                                                                                                                                                                                                                                                                                                                                                                                                                                                                                                                                                                                                                                                                                                                                                                                                                                                                                                                                                                                                                                                                | Public Health Institute of Meimurje County                | Croatian Institute of Public Health                                                                                                        | Irena Tabain, Ivana Ferenak                                                                                                                                                                                                                                       |  |
| EPI_ISL_1109566, EPI_ISL_1109567, EPI_ISL_1109568, EPI_ISL_1109569, EPI_ISL_1109570                                                                                                                                                                                                                                                                                                                                                                                                                                                                                                                                                                                                                                                                                                                                                                                                                                                                                                                                                                                                                                            | Public Health Institute of Šibenik-Knin County            | Croatian Institute of Public Health                                                                                                        | Irena Tabain, Ivana Ferenak                                                                                                                                                                                                                                       |  |
| EPI_ISL_1109571, EPI_ISL_1109572                                                                                                                                                                                                                                                                                                                                                                                                                                                                                                                                                                                                                                                                                                                                                                                                                                                                                                                                                                                                                                                                                               | Croatian Institute of Public Health                       | Croatian Institute of Public Health                                                                                                        | Irena Tabain, Ivana Ferenak                                                                                                                                                                                                                                       |  |
| EPI_ISL_1109631                                                                                                                                                                                                                                                                                                                                                                                                                                                                                                                                                                                                                                                                                                                                                                                                                                                                                                                                                                                                                                                                                                                | AZ Klina                                                  | AZ Klina                                                                                                                                   | Dr. C. Vael                                                                                                                                                                                                                                                       |  |
| EPI_ISL_1109633                                                                                                                                                                                                                                                                                                                                                                                                                                                                                                                                                                                                                                                                                                                                                                                                                                                                                                                                                                                                                                                                                                                | INNO Diagnostics Reference Laboratory                     | RCMI-Center for Research Resources, Ponce Research Institute                                                                               | Vanessa Rivera-Amill, Andrea Arias-García, Raphael Sánchez-Torres                                                                                                                                                                                                 |  |
| EPI_ISL_1109640, EPI_ISL_1109643, EPI_ISL_1109644                                                                                                                                                                                                                                                                                                                                                                                                                                                                                                                                                                                                                                                                                                                                                                                                                                                                                                                                                                                                                                                                              | Althaiia. Xarxa Assistencial Universitària de Manresa     | IrsiCaixa - Can Ruti CovidSeq                                                                                                              | Marc Noguera-Julian, Mariona Parera, Maria Casadellà, Pilar Armengol, Francesc Catala-Moll, Roger Paredes, Bonaventura Clotet Gloria Trujillo, Rafel Perez Vidal, Jaume Trape Pujol, Carolina Gonzalez Fernandez, Roger Paredes, Eulalia Grau, Bonaventura Clotet |  |
| EPI_ISL_1109811, EPI_ISL_1109813, EPI_ISL_1109815, EPI_ISL_1109819, EPI_ISL_1109821, EPI_ISL_1109823, EPI_ISL_1109824, EPI_ISL_1109828, EPI_ISL_1109829, EPI_ISL_1109830, EPI_ISL_1109833, EPI_ISL_1109834, EPI_ISL_1109835, EPI_ISL_1109836, EPI_ISL_1109837, EPI_ISL_1109838, EPI_ISL_1109839, EPI_ISL_1109842, EPI_ISL_1109843, EPI_ISL_1109865, EPI_ISL_1109878, EPI_ISL_1109879, EPI_ISL_1109881, EPI_ISL_1109883, EPI_ISL_1109884, EPI_ISL_1109886, EPI_ISL_1109887, EPI_ISL_1109889, EPI_ISL_1109890, EPI_ISL_1109891, EPI_ISL_1109892, EPI_ISL_1109893, EPI_ISL_1109894, EPI_ISL_1109895, EPI_ISL_1109896, EPI_ISL_1109899, EPI_ISL_1109900, EPI_ISL_1109901, EPI_ISL_1109902                                                                                                                                                                                                                                                                                                                                                                                                                                          |                                                           |                                                                                                                                            |                                                                                                                                                                                                                                                                   |  |
| see above                                                                                                                                                                                                                                                                                                                                                                                                                                                                                                                                                                                                                                                                                                                                                                                                                                                                                                                                                                                                                                                                                                                      | Lab voor klinische biologie                               | Lab voor klinische biologie                                                                                                                | Marija Janevska, Hannelore Hamerlinck, Bruno Verhasselt                                                                                                                                                                                                           |  |
| EPI_ISL_1109911, EPI_ISL_1109913, EPI_ISL_1109924, EPI_ISL_1109925, EPI_ISL_1109928, EPI_ISL_1109936, EPI_ISL_1109942                                                                                                                                                                                                                                                                                                                                                                                                                                                                                                                                                                                                                                                                                                                                                                                                                                                                                                                                                                                                          | AZDelta                                                   | AZDelta                                                                                                                                    | Geert Martens; Dieter De Smet                                                                                                                                                                                                                                     |  |
| EPI_ISL_1109945, EPI_ISL_1109946, EPI_ISL_1109947, EPI_ISL_1109948, EPI_ISL_1109951, EPI_ISL_1109953, EPI_ISL_1109954, EPI_ISL_1109959, EPI_ISL_1109960, EPI_ISL_1109961, EPI_ISL_1109966, EPI_ISL_1109967, EPI_ISL_1109969, EPI_ISL_1109970, EPI_ISL_1109974, EPI_ISL_1109984, EPI_ISL_1109988, EPI_ISL_1109989                                                                                                                                                                                                                                                                                                                                                                                                                                                                                                                                                                                                                                                                                                                                                                                                               |                                                           |                                                                                                                                            |                                                                                                                                                                                                                                                                   |  |
| see above                                                                                                                                                                                                                                                                                                                                                                                                                                                                                                                                                                                                                                                                                                                                                                                                                                                                                                                                                                                                                                                                                                                      | MEPHI, Aix Marseille University                           | MEPHI, Aix Marseille University                                                                                                            | Anthony LEVASSEUR                                                                                                                                                                                                                                                 |  |
| EPI_ISL_1109990                                                                                                                                                                                                                                                                                                                                                                                                                                                                                                                                                                                                                                                                                                                                                                                                                                                                                                                                                                                                                                                                                                                | Baylor Scott & White-Irving                               | Baylor Scott & White-Temple                                                                                                                | Ari Rao, Linden Morales, Kimberly Walker, Marcus Volz, Shelby Hendrickson                                                                                                                                                                                         |  |
| EPI_ISL_1109995, EPI_ISL_1109996, EPI_ISL_1109997, EPI_ISL_1109999, EPI_ISL_1110000, EPI_ISL_1110001, EPI_ISL_1110002, EPI_ISL_1110003, EPI_ISL_1110004, EPI_ISL_1110017, EPI_ISL_1110018, EPI_ISL_1110019, EPI_ISL_1110020, EPI_ISL_1110021                                                                                                                                                                                                                                                                                                                                                                                                                                                                                                                                                                                                                                                                                                                                                                                                                                                                                   |                                                           |                                                                                                                                            |                                                                                                                                                                                                                                                                   |  |
| see above                                                                                                                                                                                                                                                                                                                                                                                                                                                                                                                                                                                                                                                                                                                                                                                                                                                                                                                                                                                                                                                                                                                      | MEPHI, Aix Marseille University                           | MEPHI, Aix Marseille University                                                                                                            | Anthony LEVASSEUR                                                                                                                                                                                                                                                 |  |
| EPI_ISL_1110024, EPI_ISL_1110026                                                                                                                                                                                                                                                                                                                                                                                                                                                                                                                                                                                                                                                                                                                                                                                                                                                                                                                                                                                                                                                                                               | Baylor Scott & White-Irving                               | Baylor Scott & White-Temple                                                                                                                | Ari Rao, Linden Morales, Kimberly Walker, Marcus Volz, Shelby Hendrickson                                                                                                                                                                                         |  |
| EPI_ISL_1110041, EPI_ISL_1110042, EPI_ISL_1110045, EPI_ISL_1110046, EPI_ISL_1110047, EPI_ISL_1110048, EPI_ISL_1110050, EPI_ISL_1110053, EPI_ISL_1110054, EPI_ISL_1110056, EPI_ISL_1110061, EPI_ISL_1110062, EPI_ISL_1110063, EPI_ISL_1110064, EPI_ISL_1110065, EPI_ISL_1110066, EPI_ISL_1110067, EPI_ISL_1110068, EPI_ISL_1110069, EPI_ISL_1110070, EPI_ISL_1110071, EPI_ISL_1110072, EPI_ISL_1110073, EPI_ISL_1110074, EPI_ISL_1110075, EPI_ISL_1110076, EPI_ISL_1110077, EPI_ISL_1110078, EPI_ISL_1110079, EPI_ISL_1110080, EPI_ISL_1110081, EPI_ISL_1110082, EPI_ISL_1110083, EPI_ISL_1110085, EPI_ISL_1110086, EPI_ISL_1110087, EPI_ISL_1110088, EPI_ISL_1110090, EPI_ISL_1110091, EPI_ISL_1110092, EPI_ISL_1110093, EPI_ISL_1110094, EPI_ISL_1110095, EPI_ISL_1110096, EPI_ISL_1110098, EPI_ISL_1110099, EPI_ISL_1110100, EPI_ISL_1110102, EPI_ISL_1110103, EPI_ISL_1110104, EPI_ISL_1110105, EPI_ISL_1110106, EPI_ISL_1110107, EPI_ISL_1110108, EPI_ISL_1110109, EPI_ISL_1110110, EPI_ISL_1110111, EPI_ISL_1110112, EPI_ISL_1110115, EPI_ISL_1110116, EPI_ISL_1110117, EPI_ISL_1110118, EPI_ISL_1110119, EPI_ISL_1110120 |                                                           |                                                                                                                                            |                                                                                                                                                                                                                                                                   |  |
| see above                                                                                                                                                                                                                                                                                                                                                                                                                                                                                                                                                                                                                                                                                                                                                                                                                                                                                                                                                                                                                                                                                                                      | UW Virology Lab                                           | UW Virology Lab                                                                                                                            | Pavitra Roychoudhury, Hong Xie, Lasata Shrestha, Shah Mohamed Bakhsh, Michelle Lin, Noah Baker, Meei-Li Huang, Keith R Jerome, Alexander Greninger                                                                                                                |  |
| EPI_ISL_1110161, EPI_ISL_1110179, EPI_ISL_1110190                                                                                                                                                                                                                                                                                                                                                                                                                                                                                                                                                                                                                                                                                                                                                                                                                                                                                                                                                                                                                                                                              | Hôpital Henri Mondor                                      | Department of Virology, Henri Mondor University Hospital, Assistance Publique Hôpitaux de Paris, Université Paris-Est Créteil, INSERM U955 | Christophe Rodriguez, Slim Fourati, Vanessa Demontant, Guillaume Gricourt, Melissa N'Debi, Alexandre Soulier, Elisabeth Trawinski, Jean-Michel Pawlotsky                                                                                                          |  |
| EPI_ISL_1110197, EPI_ISL_1110198                                                                                                                                                                                                                                                                                                                                                                                                                                                                                                                                                                                                                                                                                                                                                                                                                                                                                                                                                                                                                                                                                               | G.H.E.F.Grand Hôpital EST Francilien                      | Department of Virology, Henri Mondor University Hospital, Assistance Publique Hôpitaux de Paris, Université Paris-Est Créteil, INSERM U955 | Christophe Rodriguez, Slim Fourati, Vanessa Demontant, Guillaume Gricourt, Melissa N'Debi, Alexandre Soulier, Elisabeth Trawinski, Jean-Michel Pawlotsky                                                                                                          |  |
| EPI_ISL_1110203                                                                                                                                                                                                                                                                                                                                                                                                                                                                                                                                                                                                                                                                                                                                                                                                                                                                                                                                                                                                                                                                                                                | Hôpital Henri Mondor                                      | Department of Virology, Henri Mondor University Hospital, Assistance Publique Hôpitaux de Paris, Université Paris-Est Créteil, INSERM U955 | Christophe Rodriguez, Slim Fourati, Vanessa Demontant, Guillaume Gricourt, Melissa N'Debi, Alexandre Soulier, Elisabeth Trawinski, Jean-Michel Pawlotsky                                                                                                          |  |
| EPI_ISL_1110290, EPI_ISL_1110292                                                                                                                                                                                                                                                                                                                                                                                                                                                                                                                                                                                                                                                                                                                                                                                                                                                                                                                                                                                                                                                                                               | Baylor Scott & White-Temple                               | Baylor Scott & White-Temple                                                                                                                | Ari Rao, Linden Morales, Kimberly Walker, Marcus Volz, Shelby Hendrickson                                                                                                                                                                                         |  |

EPI\_ISL\_1110295, EPI\_ISL\_1110296, EPI\_ISL\_1110297, EPI\_ISL\_1110298, EPI\_ISL\_1110301, EPI\_ISL\_1110302, EPI\_ISL\_1110308, EPI\_ISL\_1110311, EPI\_ISL\_1110312, EPI\_ISL\_1110313, EPI\_ISL\_1110318, EPI\_ISL\_1110320, EPI\_ISL\_1110322, EPI\_ISL\_1110323, EPI\_ISL\_1110324, EPI\_ISL\_1110325, EPI\_ISL\_1110327, EPI\_ISL\_1110329, EPI\_ISL\_1110330, EPI\_ISL\_1110331, EPI\_ISL\_1110335, EPI\_ISL\_1110336, EPI\_ISL\_1110337, EPI\_ISL\_1110341, EPI\_ISL\_1110344, EPI\_ISL\_1110346, EPI\_ISL\_1110351, EPI\_ISL\_1110353, EPI\_ISL\_1110355, EPI\_ISL\_1110356, EPI\_ISL\_1110358, EPI\_ISL\_1110359, EPI\_ISL\_1110361, EPI\_ISL\_1110363, EPI\_ISL\_1110364, EPI\_ISL\_1110367, EPI\_ISL\_1110369, EPI\_ISL\_1110372, EPI\_ISL\_1110376, EPI\_ISL\_1110378, EPI\_ISL\_1110381, EPI\_ISL\_1110382, EPI\_ISL\_1110383, EPI\_ISL\_1110384, EPI\_ISL\_1110385, EPI\_ISL\_1110386, EPI\_ISL\_1110387, EPI\_ISL\_1110388

[illegible]

|                                                                                                                                                                                                                                                                                                                                                                                                                                         |                                                                                          |                                                                                          |                                                                                                                                                                                                                                                                        |
|-----------------------------------------------------------------------------------------------------------------------------------------------------------------------------------------------------------------------------------------------------------------------------------------------------------------------------------------------------------------------------------------------------------------------------------------|------------------------------------------------------------------------------------------|------------------------------------------------------------------------------------------|------------------------------------------------------------------------------------------------------------------------------------------------------------------------------------------------------------------------------------------------------------------------|
| EPI_ISL_1110457                                                                                                                                                                                                                                                                                                                                                                                                                         | Hopital                                                                                  | National Reference Center for Viruses of Respiratory Infections, Institut Pasteur, Paris | Marion Barbet, Sylvie Behillil, Méline Bizard, Angela Brisebarre, Camille Capel, Etienne Simon-Lorière, Vincent Enouf, Maud Vanpeene, Sylvie van der Werf,Febreau Christine                                                                                            |
| EPI_ISL_1110458, EPI_ISL_1110459                                                                                                                                                                                                                                                                                                                                                                                                        | Hopital                                                                                  | National Reference Center for Viruses of Respiratory Infections, Institut Pasteur, Paris | Marion Barbet, Sylvie Behillil, Méline Bizard, Angela Brisebarre, Camille Capel, Etienne Simon-Lorière, Vincent Enouf, Maud Vanpeene, Sylvie van der Werf,                                                                                                             |
| EPI_ISL_1110460                                                                                                                                                                                                                                                                                                                                                                                                                         | Labo Analyses Med                                                                        | National Reference Center for Viruses of Respiratory Infections, Institut Pasteur, Paris | Marion Barbet, Sylvie Behillil, Méline Bizard, Angela Brisebarre, Camille Capel, Etienne Simon-Lorière, Vincent Enouf, Maud Vanpeene, Sylvie van der Werf,Felloni Claire                                                                                               |
| EPI_ISL_1110461                                                                                                                                                                                                                                                                                                                                                                                                                         | Labo Analyses Med                                                                        | National Reference Center for Viruses of Respiratory Infections, Institut Pasteur, Paris | Marion Barbet, Sylvie Behillil, Méline Bizard, Angela Brisebarre, Camille Capel, Etienne Simon-Lorière, Vincent Enouf, Maud Vanpeene, Sylvie van der Werf,                                                                                                             |
| EPI_ISL_1110462                                                                                                                                                                                                                                                                                                                                                                                                                         | Hopital                                                                                  | National Reference Center for Viruses of Respiratory Infections, Institut Pasteur, Paris | Marion Barbet, Sylvie Behillil, Méline Bizard, Angela Brisebarre, Camille Capel, Etienne Simon-Lorière, Vincent Enouf, Maud Vanpeene, Sylvie van der Werf,                                                                                                             |
| EPI_ISL_1110464, EPI_ISL_1110465, EPI_ISL_1110466                                                                                                                                                                                                                                                                                                                                                                                       | Hopital                                                                                  | National Reference Center for Viruses of Respiratory Infections, Institut Pasteur, Paris | Marion Barbet, Sylvie Behillil, Méline Bizard, Angela Brisebarre, Camille Capel, Etienne Simon-Lorière, Vincent Enouf, Maud Vanpeene, Sylvie van der Werf,Ducancelle Alexandra                                                                                         |
| EPI_ISL_1110467                                                                                                                                                                                                                                                                                                                                                                                                                         | Labo Analyses Med                                                                        | National Reference Center for Viruses of Respiratory Infections, Institut Pasteur, Paris | Marion Barbet, Sylvie Behillil, Méline Bizard, Angela Brisebarre, Camille Capel, Etienne Simon-Lorière, Vincent Enouf, Maud Vanpeene, Sylvie van der Werf,Lesimple BéAtrice                                                                                            |
| EPI_ISL_1110468                                                                                                                                                                                                                                                                                                                                                                                                                         | Labo Analyses Med                                                                        | National Reference Center for Viruses of Respiratory Infections, Institut Pasteur, Paris | Marion Barbet, Sylvie Behillil, Méline Bizard, Angela Brisebarre, Camille Capel, Etienne Simon-Lorière, Vincent Enouf, Maud Vanpeene, Sylvie van der Werf,Holstein Anne                                                                                                |
| EPI_ISL_1110469                                                                                                                                                                                                                                                                                                                                                                                                                         | Labo Analyses Med                                                                        | National Reference Center for Viruses of Respiratory Infections, Institut Pasteur, Paris | Marion Barbet, Sylvie Behillil, Méline Bizard, Angela Brisebarre, Camille Capel, Etienne Simon-Lorière, Vincent Enouf, Maud Vanpeene, Sylvie van der Werf,Potiron GréGoire                                                                                             |
| EPI_ISL_1110470, EPI_ISL_1110471, EPI_ISL_1110473                                                                                                                                                                                                                                                                                                                                                                                       | Labo Analyses Med                                                                        | National Reference Center for Viruses of Respiratory Infections, Institut Pasteur, Paris | Marion Barbet, Sylvie Behillil, Méline Bizard, Angela Brisebarre, Camille Capel, Etienne Simon-Lorière, Vincent Enouf, Maud Vanpeene, Sylvie van der Werf,Etienne Elodie                                                                                               |
| EPI_ISL_1110475                                                                                                                                                                                                                                                                                                                                                                                                                         | Hopital                                                                                  | National Reference Center for Viruses of Respiratory Infections, Institut Pasteur, Paris | Marion Barbet, Sylvie Behillil, Méline Bizard, Angela Brisebarre, Camille Capel, Etienne Simon-Lorière, Vincent Enouf, Maud Vanpeene, Sylvie van der Werf,Morvan Pauline                                                                                               |
| EPI_ISL_1110476, EPI_ISL_1110477, EPI_ISL_1110478, EPI_ISL_1110479, EPI_ISL_1110480, EPI_ISL_1110481, EPI_ISL_1110482, EPI_ISL_1110483, EPI_ISL_1110484, EPI_ISL_1110485, EPI_ISL_1110486, EPI_ISL_1110487, EPI_ISL_1110488, EPI_ISL_1110489, EPI_ISL_1110490, EPI_ISL_1110491                                                                                                                                                          | see above                                                                                | National Reference Center for Viruses of Respiratory Infections, Institut Pasteur, Paris | Marion Barbet, Sylvie Behillil, Méline Bizard, Angela Brisebarre, Camille Capel, Etienne Simon-Lorière, Vincent Enouf, Maud Vanpeene, Sylvie van der Werf,Pilorge LéA                                                                                                  |
| EPI_ISL_1110515                                                                                                                                                                                                                                                                                                                                                                                                                         | Vestfold Hospital, Toensberg Department of Microbiology                                  | Norwegian Institute of Public Health, Department of Virology                             | Kathrine Stene-Johansen, Kamilla Heddeland Instefjord, Hilde Elshaug, Garcia Llorente Ignacio, Engebretsen Serina Beate,Pedersen Benedikte Nevjen, Debech Nadia, Atiya R Ali,Marie Paulsen Madsen, Rasmus Riis Kopperud, Hilde Vollan, Karoline Bragstad, Olav Hungnes |
| EPI_ISL_1110516, EPI_ISL_1110517, EPI_ISL_1110518, EPI_ISL_1110519, EPI_ISL_1110520                                                                                                                                                                                                                                                                                                                                                     | Akershus University Hospital, Department for Microbiology and Infectious Disease Control | Norwegian Institute of Public Health, Department of Virology                             | Kathrine Stene-Johansen, Kamilla Heddeland Instefjord, Hilde Elshaug, Garcia Llorente Ignacio, Engebretsen Serina Beate,Pedersen Benedikte Nevjen, Debech Nadia, Atiya R Ali,Marie Paulsen Madsen, Rasmus Riis Kopperud, Hilde Vollan, Karoline Bragstad, Olav Hungnes |
| EPI_ISL_1110521, EPI_ISL_1110522, EPI_ISL_1110523                                                                                                                                                                                                                                                                                                                                                                                       | Furst Medical Laboratory                                                                 | Norwegian Institute of Public Health, Department of Virology                             | Kathrine Stene-Johansen, Kamilla Heddeland Instefjord, Hilde Elshaug, Garcia Llorente Ignacio, Engebretsen Serina Beate,Pedersen Benedikte Nevjen, Debech Nadia, Atiya R Ali,Marie Paulsen Madsen, Rasmus Riis Kopperud, Hilde Vollan, Karoline Bragstad, Olav Hungnes |
| EPI_ISL_1110524, EPI_ISL_1110526, EPI_ISL_1110527, EPI_ISL_1110528, EPI_ISL_1110529, EPI_ISL_1110531, EPI_ISL_1110532                                                                                                                                                                                                                                                                                                                   | Akershus University Hospital, Department for Microbiology and Infectious Disease Control | Norwegian Institute of Public Health, Department of Virology                             | Kathrine Stene-Johansen, Kamilla Heddeland Instefjord, Hilde Elshaug, Garcia Llorente Ignacio, Engebretsen Serina Beate,Pedersen Benedikte Nevjen, Debech Nadia, Atiya R Ali,Marie Paulsen Madsen, Rasmus Riis Kopperud, Hilde Vollan, Karoline Bragstad, Olav Hungnes |
| EPI_ISL_1110538, EPI_ISL_1110539                                                                                                                                                                                                                                                                                                                                                                                                        | Furst Medical Laboratory                                                                 | Norwegian Institute of Public Health, Department of Virology                             | Kathrine Stene-Johansen, Kamilla Heddeland Instefjord, Hilde Elshaug, Garcia Llorente Ignacio, Engebretsen Serina Beate,Pedersen Benedikte Nevjen, Debech Nadia, Atiya R Ali,Marie Paulsen Madsen, Rasmus Riis Kopperud, Hilde Vollan, Karoline Bragstad, Olav Hungnes |
| EPI_ISL_1110543, EPI_ISL_1110544, EPI_ISL_1110545                                                                                                                                                                                                                                                                                                                                                                                       | Akershus University Hospital, Department for Microbiology and Infectious Disease Control | Norwegian Institute of Public Health, Department of Virology                             | Kathrine Stene-Johansen, Kamilla Heddeland Instefjord, Hilde Elshaug, Garcia Llorente Ignacio, Engebretsen Serina Beate,Pedersen Benedikte Nevjen, Debech Nadia, Atiya R Ali,Marie Paulsen Madsen, Rasmus Riis Kopperud, Hilde Vollan, Karoline Bragstad, Olav Hungnes |
| EPI_ISL_1110547                                                                                                                                                                                                                                                                                                                                                                                                                         | Hospital of Southern Norway - Kristiansand, Department of Medical Microbiology           | Norwegian Institute of Public Health, Department of Virology                             | Kathrine Stene-Johansen, Kamilla Heddeland Instefjord, Hilde Elshaug, Garcia Llorente Ignacio, Engebretsen Serina Beate,Pedersen Benedikte Nevjen, Debech Nadia, Atiya R Ali,Marie Paulsen Madsen, Rasmus Riis Kopperud, Hilde Vollan, Karoline Bragstad, Olav Hungnes |
| EPI_ISL_1110548, EPI_ISL_1110550, EPI_ISL_1110551, EPI_ISL_1110552                                                                                                                                                                                                                                                                                                                                                                      | Akershus University Hospital, Department for Microbiology and Infectious Disease Control | Norwegian Institute of Public Health, Department of Virology                             | Kathrine Stene-Johansen, Kamilla Heddeland Instefjord, Hilde Elshaug, Garcia Llorente Ignacio, Engebretsen Serina Beate,Pedersen Benedikte Nevjen, Debech Nadia, Atiya R Ali,Marie Paulsen Madsen, Rasmus Riis Kopperud, Hilde Vollan, Karoline Bragstad, Olav Hungnes |
| EPI_ISL_1110583, EPI_ISL_1110586, EPI_ISL_1110588, EPI_ISL_1110593                                                                                                                                                                                                                                                                                                                                                                      | LAB ANALISI PO CARDARELLI CB                                                             | Istituto Zooprofilattico Sperimentale dell'Abruzzo e Molise "G. Caporale"                | Scutellà M, Niro G, Lorusso A, Marcacci M, Di Domenico M, Ancora M, Curini V, Mangone I, Rinaldi A, Scialabba S, Di Pasquale A, Cammà C, Puglia I, Calistri P, Savini G                                                                                                |
| EPI_ISL_1110596                                                                                                                                                                                                                                                                                                                                                                                                                         | SIESP L'Aquila                                                                           | Istituto Zooprofilattico Sperimentale dell'Abruzzo e Molise "G. Caporale"                | Lorusso A, Marcacci M, Di Domenico M, Ancora M, Curini V, Mangone I, Rinaldi A, Scialabba S, Di Pasquale A, Cammà C, Puglia I, Calistri P, Savini G                                                                                                                    |
| EPI_ISL_1110599                                                                                                                                                                                                                                                                                                                                                                                                                         | SIESP CH-Drive in VASTO                                                                  | Istituto Zooprofilattico Sperimentale dell'Abruzzo e Molise "G. Caporale"                | Lorusso A, Marcacci M, Di Domenico M, Ancora M, Curini V, Mangone I, Rinaldi A, Scialabba S, Di Pasquale A, Cammà C, Puglia I, Calistri P, Savini G                                                                                                                    |
| EPI_ISL_1110747, EPI_ISL_1110748, EPI_ISL_1110750, EPI_ISL_1110751, EPI_ISL_1110753, EPI_ISL_1110755, EPI_ISL_1110756, EPI_ISL_1110757, EPI_ISL_1110758, EPI_ISL_1110759, EPI_ISL_1110760, EPI_ISL_1110762, EPI_ISL_1110765, EPI_ISL_1110768, EPI_ISL_1110769, EPI_ISL_1110770, EPI_ISL_1110771, EPI_ISL_1110772, EPI_ISL_1110773, EPI_ISL_1110774, EPI_ISL_1110775, EPI_ISL_1110776, EPI_ISL_1110777, EPI_ISL_1110778, EPI_ISL_1110779 | see above                                                                                | Croatian Institute of Public Health                                                      | Irena Tabain, Ivana Ferenak                                                                                                                                                                                                                                            |
| EPI_ISL_1110780, EPI_ISL_1110781, EPI_ISL_1110782                                                                                                                                                                                                                                                                                                                                                                                       | Croatian Institute of Public Health                                                      | Croatian Institute of Public Health                                                      | Irena Tabain, Ivana Ferenak                                                                                                                                                                                                                                            |
| EPI_ISL_1110784, EPI_ISL_1110785, EPI_ISL_1110787, EPI_ISL_1110788, EPI_ISL_1110789, EPI_ISL_1110790                                                                                                                                                                                                                                                                                                                                    | Public Health Institute of Šibenik-Knin County                                           | Croatian Institute of Public Health                                                      | Irena Tabain, Ivana Ferenak                                                                                                                                                                                                                                            |
| EPI_ISL_1110792                                                                                                                                                                                                                                                                                                                                                                                                                         | Croatian Institute of Public Health                                                      | Croatian Institute of Public Health                                                      | Irena Tabain, Ivana Ferenak                                                                                                                                                                                                                                            |
| EPI_ISL_1110793, EPI_ISL_1110794, EPI_ISL_1110795, EPI_ISL_1110797, EPI_ISL_1110800, EPI_ISL_1110801, EPI_ISL_1110802, EPI_ISL_1110803                                                                                                                                                                                                                                                                                                  | Public Health Institute of Šibenik-Knin County                                           | Croatian Institute of Public Health                                                      | Irena Tabain, Ivana Ferenak                                                                                                                                                                                                                                            |
| EPI_ISL_1110806, EPI_ISL_1110807, EPI_ISL_1110808, EPI_ISL_1110809, EPI_ISL_1110811, EPI_ISL_1110812, EPI_ISL_1110813, EPI_ISL_1110814, EPI_ISL_1110815, EPI_ISL_1110816, EPI_ISL_1110818, EPI_ISL_1110821, EPI_ISL_1110822, EPI_ISL_1110826, EPI_ISL_1110828, EPI_ISL_1110829, EPI_ISL_1110832, EPI_ISL_1110833                                                                                                                        | see above                                                                                | Croatian Institute of Public Health                                                      | Irena Tabain, Ivana Ferenak                                                                                                                                                                                                                                            |
| EPI_ISL_1110882, EPI_ISL_1110883                                                                                                                                                                                                                                                                                                                                                                                                        | Hopital                                                                                  | National Reference Center for Viruses of Respiratory Infections, Institut Pasteur, Paris | Marion Barbet, Sylvie Behillil, Méline Bizard, Angela Brisebarre, Camille Capel, Etienne Simon-Lorière, Vincent Enouf, Maud Vanpeene, Sylvie van der Werf,Griscelli Franck                                                                                             |
| EPI_ISL_1110884, EPI_ISL_1110885                                                                                                                                                                                                                                                                                                                                                                                                        | Hopital                                                                                  | National Reference Center for Viruses of Respiratory Infections, Institut Pasteur, Paris | Marion Barbet, Sylvie Behillil, Méline Bizard, Angela Brisebarre, Camille Capel, Etienne Simon-Lorière, Vincent Enouf, Maud Vanpeene, Sylvie van der Werf,Pilorge LéA                                                                                                  |
| EPI_ISL_1110886, EPI_ISL_1110887                                                                                                                                                                                                                                                                                                                                                                                                        | Hopital                                                                                  | National Reference Center for Viruses of Respiratory                                     | Marion Barbet, Sylvie Behillil, Méline Bizard, Angela Brisebarre, Camille Capel, Etienne Simon-Lorière, Vincent Enouf, Maud Vanpeene, Sylvie van der                                                                                                                   |

[illegible]



|                                                                                                                                                                                                                                                                                                                                                                                                                                                                                                                                                                                                                                                                                                                         |                                                                                                    |                                                                                                                                                                                                                                                                                                               |                                                                                                                                                                                                                                                                                                                              |
|-------------------------------------------------------------------------------------------------------------------------------------------------------------------------------------------------------------------------------------------------------------------------------------------------------------------------------------------------------------------------------------------------------------------------------------------------------------------------------------------------------------------------------------------------------------------------------------------------------------------------------------------------------------------------------------------------------------------------|----------------------------------------------------------------------------------------------------|---------------------------------------------------------------------------------------------------------------------------------------------------------------------------------------------------------------------------------------------------------------------------------------------------------------|------------------------------------------------------------------------------------------------------------------------------------------------------------------------------------------------------------------------------------------------------------------------------------------------------------------------------|
| EPI_ISL_1114474                                                                                                                                                                                                                                                                                                                                                                                                                                                                                                                                                                                                                                                                                                         |                                                                                                    |                                                                                                                                                                                                                                                                                                               |                                                                                                                                                                                                                                                                                                                              |
| EPI_ISL_1114476                                                                                                                                                                                                                                                                                                                                                                                                                                                                                                                                                                                                                                                                                                         | Department of Health and Mental Hygiene Public Health Laboratory                                   | New York City Public Health Laboratory                                                                                                                                                                                                                                                                        | Jade Wang, et al.                                                                                                                                                                                                                                                                                                            |
| EPI_ISL_1114477, EPI_ISL_1114478, EPI_ISL_1114480, EPI_ISL_1114481                                                                                                                                                                                                                                                                                                                                                                                                                                                                                                                                                                                                                                                      | Department of Health and Mental Hygiene Jamaica                                                    | New York City Public Health Laboratory                                                                                                                                                                                                                                                                        | Jade Wang, et al.                                                                                                                                                                                                                                                                                                            |
| EPI_ISL_1114482, EPI_ISL_1114484                                                                                                                                                                                                                                                                                                                                                                                                                                                                                                                                                                                                                                                                                        | Department of Health and Mental Hygiene Public Health Laboratory                                   | New York City Public Health Laboratory                                                                                                                                                                                                                                                                        | Jade Wang, et al.                                                                                                                                                                                                                                                                                                            |
| EPI_ISL_1114485                                                                                                                                                                                                                                                                                                                                                                                                                                                                                                                                                                                                                                                                                                         | Department of Health and Mental Hygiene Crown Heights                                              | New York City Public Health Laboratory                                                                                                                                                                                                                                                                        | Jade Wang, et al.                                                                                                                                                                                                                                                                                                            |
| EPI_ISL_1114486                                                                                                                                                                                                                                                                                                                                                                                                                                                                                                                                                                                                                                                                                                         | Department of Health and Mental Hygiene Public Health Laboratory                                   | New York City Public Health Laboratory                                                                                                                                                                                                                                                                        | Jade Wang, et al.                                                                                                                                                                                                                                                                                                            |
| EPI_ISL_1114487, EPI_ISL_1114488, EPI_ISL_1114490, EPI_ISL_1114491                                                                                                                                                                                                                                                                                                                                                                                                                                                                                                                                                                                                                                                      | Department of Health and Mental Hygiene Morrisania                                                 | New York City Public Health Laboratory                                                                                                                                                                                                                                                                        | Jade Wang, et al.                                                                                                                                                                                                                                                                                                            |
| EPI_ISL_1114492, EPI_ISL_1114493                                                                                                                                                                                                                                                                                                                                                                                                                                                                                                                                                                                                                                                                                        | Department of Health and Mental Hygiene Central Harlem                                             | New York City Public Health Laboratory                                                                                                                                                                                                                                                                        | Jade Wang, et al.                                                                                                                                                                                                                                                                                                            |
| EPI_ISL_1114495                                                                                                                                                                                                                                                                                                                                                                                                                                                                                                                                                                                                                                                                                                         | Department of Health and Mental Hygiene Fort Greene                                                | New York City Public Health Laboratory                                                                                                                                                                                                                                                                        | Jade Wang, et al.                                                                                                                                                                                                                                                                                                            |
| EPI_ISL_1114500                                                                                                                                                                                                                                                                                                                                                                                                                                                                                                                                                                                                                                                                                                         | Department of Health and Mental Hygiene Chelsea                                                    | New York City Public Health Laboratory                                                                                                                                                                                                                                                                        | Jade Wang, et al.                                                                                                                                                                                                                                                                                                            |
| EPI_ISL_1114503                                                                                                                                                                                                                                                                                                                                                                                                                                                                                                                                                                                                                                                                                                         | Department of Health and Mental Hygiene Riverside                                                  | New York City Public Health Laboratory                                                                                                                                                                                                                                                                        | Jade Wang, et al.                                                                                                                                                                                                                                                                                                            |
| EPI_ISL_1114506                                                                                                                                                                                                                                                                                                                                                                                                                                                                                                                                                                                                                                                                                                         | Department of Health and Mental Hygiene Corona                                                     | New York City Public Health Laboratory                                                                                                                                                                                                                                                                        | Jade Wang, et al.                                                                                                                                                                                                                                                                                                            |
| EPI_ISL_1114509                                                                                                                                                                                                                                                                                                                                                                                                                                                                                                                                                                                                                                                                                                         | Department of Health and Mental Hygiene Chelsea                                                    | New York City Public Health Laboratory                                                                                                                                                                                                                                                                        | Jade Wang, et al.                                                                                                                                                                                                                                                                                                            |
| EPI_ISL_1114512                                                                                                                                                                                                                                                                                                                                                                                                                                                                                                                                                                                                                                                                                                         | Department of Homeless Services                                                                    | New York City Public Health Laboratory                                                                                                                                                                                                                                                                        | Jade Wang, et al.                                                                                                                                                                                                                                                                                                            |
| EPI_ISL_1114522, EPI_ISL_1114523                                                                                                                                                                                                                                                                                                                                                                                                                                                                                                                                                                                                                                                                                        | Department of Health and Mental Hygiene Public Health Laboratory                                   | New York City Public Health Laboratory                                                                                                                                                                                                                                                                        | Jade Wang, et al.                                                                                                                                                                                                                                                                                                            |
| EPI_ISL_1114524                                                                                                                                                                                                                                                                                                                                                                                                                                                                                                                                                                                                                                                                                                         | Department of Health and Mental Hygiene Chelsea                                                    | New York City Public Health Laboratory                                                                                                                                                                                                                                                                        | Jade Wang, et al.                                                                                                                                                                                                                                                                                                            |
| EPI_ISL_1114527, EPI_ISL_1114529                                                                                                                                                                                                                                                                                                                                                                                                                                                                                                                                                                                                                                                                                        | OCME Office Of Chief Medical Examiner                                                              | New York City Public Health Laboratory                                                                                                                                                                                                                                                                        | Jade Wang, et al.                                                                                                                                                                                                                                                                                                            |
| EPI_ISL_1114533, EPI_ISL_1114534, EPI_ISL_1114535, EPI_ISL_1114536, EPI_ISL_1114538, EPI_ISL_1114539, EPI_ISL_1114559, EPI_ISL_1114561, EPI_ISL_1114562, EPI_ISL_1114563, EPI_ISL_1114564, EPI_ISL_1114565, EPI_ISL_1114581, EPI_ISL_1114584, EPI_ISL_1114586, EPI_ISL_1114587, EPI_ISL_1114589, EPI_ISL_1114590, EPI_ISL_1114607, EPI_ISL_1114609, EPI_ISL_1114610, EPI_ISL_1114613, EPI_ISL_1114614, EPI_ISL_1114616, EPI_ISL_1114634, EPI_ISL_1114635, EPI_ISL_1114636, EPI_ISL_1114637, EPI_ISL_1114639, EPI_ISL_1114641, EPI_ISL_1114643, EPI_ISL_1114645, EPI_ISL_1114646, EPI_ISL_1114660, EPI_ISL_1114664, EPI_ISL_1114666, EPI_ISL_1114667, EPI_ISL_1114668, EPI_ISL_1114669, EPI_ISL_1114670, EPI_ISL_1114671 | Respiratory Viruses Branch, Division of Viral Diseases, Centers for Disease Control and Prevention | Peter W. Cook, Dakota Howard, Dhvani Batra, Ben L. Rambo-Martin, S. H. Rosenthal, A. Gerasimova, R. M. Kagan, B. Anderson, M. Hua, Y. Liu, L.E. Bernstein, K.E. Livingston, A. Perez, I. A. Shlyakhter, R. V. Rolando, R. Owen, P. Tanpaiboon, F. Lacbawan, Clinton R. Paden, Suxiang Tong, Duncan MacCannell |                                                                                                                                                                                                                                                                                                                              |
| see above                                                                                                                                                                                                                                                                                                                                                                                                                                                                                                                                                                                                                                                                                                               | Quest Diagnostics Incorporated                                                                     |                                                                                                                                                                                                                                                                                                               |                                                                                                                                                                                                                                                                                                                              |
| EPI_ISL_1114673, EPI_ISL_1114678, EPI_ISL_1114679, EPI_ISL_1114680, EPI_ISL_1114681, EPI_ISL_1114682, EPI_ISL_1114685, EPI_ISL_1114686, EPI_ISL_1114687, EPI_ISL_1114692, EPI_ISL_1114696, EPI_ISL_1114700, EPI_ISL_1114701, EPI_ISL_1114702, EPI_ISL_1114703, EPI_ISL_1114705, EPI_ISL_1114706, EPI_ISL_1114707, EPI_ISL_1114708, EPI_ISL_1114715                                                                                                                                                                                                                                                                                                                                                                      |                                                                                                    |                                                                                                                                                                                                                                                                                                               |                                                                                                                                                                                                                                                                                                                              |
| see above                                                                                                                                                                                                                                                                                                                                                                                                                                                                                                                                                                                                                                                                                                               | New Mexico Department of Health Scientific Laboratory                                              | New Mexico Department of Health Scientific Laboratory                                                                                                                                                                                                                                                         | Ellie Johnson, Anastacia Griego-Fisher, D'eldra Malone, Jennifer Benoit                                                                                                                                                                                                                                                      |
| EPI_ISL_1114767, EPI_ISL_1114768, EPI_ISL_1114770, EPI_ISL_1114771                                                                                                                                                                                                                                                                                                                                                                                                                                                                                                                                                                                                                                                      | National Institute of Infectious Diseases-Prof. Dr. Matei Bals Molecular Diagnostics Laboratory    | National Institute of Infectious Diseases-Prof. Dr. Matei Bals Molecular Diagnostics Laboratory                                                                                                                                                                                                               | Leontina Banica, Marius Surleac, Corina Casangiu, Petre Milu, Andreea Tudor, Simona Paraschiv, Dan Otelea                                                                                                                                                                                                                    |
| EPI_ISL_1114772                                                                                                                                                                                                                                                                                                                                                                                                                                                                                                                                                                                                                                                                                                         | Lighthouse Lab in Alderley Park                                                                    | Wellcome Sanger Institute for the COVID-19 Genomics UK (COG-UK) Consortium                                                                                                                                                                                                                                    | Jacquelyn Wynn, Mairead Hyland, The Lighthouse Lab in Alderley Park and Alex Alderton, Roberto Amato, Jeffrey Barrett, Sonia Goncalves, Ewan Harrison, David K. Jackson, Ian Johnston, Dominic Kwiatkowski, Cordelia Langford, John Sillitoe on behalf of the Wellcome Sanger Institute COVID-19 Surveillance Team           |
| EPI_ISL_1114773                                                                                                                                                                                                                                                                                                                                                                                                                                                                                                                                                                                                                                                                                                         | Lighthouse Lab in Milton Keynes                                                                    | Wellcome Sanger Institute for the COVID-19 Genomics UK (COG-UK) Consortium                                                                                                                                                                                                                                    | The Lighthouse Lab in Milton Keynes and Alex Alderton, Roberto Amato, Jeffrey Barrett, Sonia Goncalves, Ewan Harrison, David K. Jackson, Ian Johnston, Dominic Kwiatkowski, Cordelia Langford, John Sillitoe on behalf of the Wellcome Sanger Institute COVID-19 Surveillance Team                                           |
| EPI_ISL_1114776                                                                                                                                                                                                                                                                                                                                                                                                                                                                                                                                                                                                                                                                                                         | Lighthouse Lab in Alderley Park                                                                    | Wellcome Sanger Institute for the COVID-19 Genomics UK (COG-UK) Consortium                                                                                                                                                                                                                                    | Jacquelyn Wynn, Mairead Hyland, The Lighthouse Lab in Alderley Park and Alex Alderton, Roberto Amato, Jeffrey Barrett, Sonia Goncalves, Ewan Harrison, David K. Jackson, Ian Johnston, Dominic Kwiatkowski, Cordelia Langford, John Sillitoe on behalf of the Wellcome Sanger Institute COVID-19 Surveillance Team           |
| EPI_ISL_1114778                                                                                                                                                                                                                                                                                                                                                                                                                                                                                                                                                                                                                                                                                                         | Lighthouse Lab in Milton Keynes                                                                    | Wellcome Sanger Institute for the COVID-19 Genomics UK (COG-UK) Consortium                                                                                                                                                                                                                                    | The Lighthouse Lab in Milton Keynes and Alex Alderton, Roberto Amato, Jeffrey Barrett, Sonia Goncalves, Ewan Harrison, David K. Jackson, Ian Johnston, Dominic Kwiatkowski, Cordelia Langford, John Sillitoe on behalf of the Wellcome Sanger Institute COVID-19 Surveillance Team                                           |
| EPI_ISL_1114779, EPI_ISL_1114781                                                                                                                                                                                                                                                                                                                                                                                                                                                                                                                                                                                                                                                                                        | Lighthouse Lab in Glasgow                                                                          | Wellcome Sanger Institute for the COVID-19 Genomics UK (COG-UK) Consortium                                                                                                                                                                                                                                    | Harper VanSteenhouse, Yumi Kasai, David Gray, Carol Clugston, Anna Dominiczak and Alex Alderton, Roberto Amato, Jeffrey Barrett, Sonia Goncalves, Ewan Harrison, David K. Jackson, Ian Johnston, Dominic Kwiatkowski, Cordelia Langford, John Sillitoe on behalf of the Wellcome Sanger Institute COVID-19 Surveillance Team |
| EPI_ISL_1114782                                                                                                                                                                                                                                                                                                                                                                                                                                                                                                                                                                                                                                                                                                         | Lighthouse Lab in Alderley Park                                                                    | Wellcome Sanger Institute for the COVID-19 Genomics UK (COG-UK) Consortium                                                                                                                                                                                                                                    | Jacquelyn Wynn, Mairead Hyland, The Lighthouse Lab in Alderley Park and Alex Alderton, Roberto Amato, Jeffrey Barrett, Sonia Goncalves, Ewan Harrison, David K. Jackson, Ian Johnston, Dominic Kwiatkowski, Cordelia Langford, John Sillitoe on behalf of the Wellcome Sanger Institute COVID-19 Surveillance Team           |
| EPI_ISL_1114785, EPI_ISL_1114787                                                                                                                                                                                                                                                                                                                                                                                                                                                                                                                                                                                                                                                                                        | Lighthouse Lab in Milton Keynes                                                                    | Wellcome Sanger Institute for the COVID-19 Genomics UK (COG-UK) Consortium                                                                                                                                                                                                                                    | The Lighthouse Lab in Milton Keynes and Alex Alderton, Roberto Amato, Jeffrey Barrett, Sonia Goncalves, Ewan Harrison, David K. Jackson, Ian Johnston, Dominic Kwiatkowski, Cordelia Langford, John Sillitoe on behalf of the Wellcome Sanger Institute COVID-19 Surveillance Team                                           |
| EPI_ISL_1114788, EPI_ISL_1114790, EPI_ISL_1114791                                                                                                                                                                                                                                                                                                                                                                                                                                                                                                                                                                                                                                                                       | Lighthouse Lab in Glasgow                                                                          | Wellcome Sanger Institute for the COVID-19 Genomics UK (COG-UK) Consortium                                                                                                                                                                                                                                    | Harper VanSteenhouse, Yumi Kasai, David Gray, Carol Clugston, Anna Dominiczak and Alex Alderton, Roberto Amato, Jeffrey Barrett, Sonia Goncalves, Ewan Harrison, David K. Jackson, Ian Johnston, Dominic Kwiatkowski, Cordelia Langford, John Sillitoe on behalf of the Wellcome Sanger Institute COVID-19 Surveillance Team |
| EPI_ISL_1114793                                                                                                                                                                                                                                                                                                                                                                                                                                                                                                                                                                                                                                                                                                         | Lighthouse Lab in Milton Keynes                                                                    | Wellcome Sanger Institute for the COVID-19 Genomics UK (COG-UK) Consortium                                                                                                                                                                                                                                    | The Lighthouse Lab in Milton Keynes and Alex Alderton, Roberto Amato, Jeffrey Barrett, Sonia Goncalves, Ewan Harrison, David K. Jackson, Ian Johnston, Dominic Kwiatkowski, Cordelia Langford, John Sillitoe on behalf of the Wellcome Sanger Institute COVID-19 Surveillance Team                                           |
| EPI_ISL_1114797                                                                                                                                                                                                                                                                                                                                                                                                                                                                                                                                                                                                                                                                                                         | Lighthouse Lab in Alderley Park                                                                    | Wellcome Sanger Institute for the COVID-19 Genomics UK (COG-UK) Consortium                                                                                                                                                                                                                                    | Jacquelyn Wynn, Mairead Hyland, The Lighthouse Lab in Alderley Park and Alex Alderton, Roberto Amato, Jeffrey Barrett, Sonia Goncalves, Ewan Harrison, David K. Jackson, Ian Johnston, Dominic Kwiatkowski, Cordelia Langford, John Sillitoe on behalf of the Wellcome Sanger Institute COVID-19 Surveillance Team           |
| EPI_ISL_1114798                                                                                                                                                                                                                                                                                                                                                                                                                                                                                                                                                                                                                                                                                                         | Lighthouse Lab in Milton Keynes                                                                    | Wellcome Sanger Institute for the COVID-19 Genomics UK (COG-UK) Consortium                                                                                                                                                                                                                                    | The Lighthouse Lab in Milton Keynes and Alex Alderton, Roberto Amato, Jeffrey Barrett, Sonia Goncalves, Ewan Harrison, David K. Jackson, Ian Johnston, Dominic Kwiatkowski, Cordelia Langford, John Sillitoe on behalf of the Wellcome Sanger Institute COVID-19 Surveillance Team                                           |
| EPI_ISL_1114799                                                                                                                                                                                                                                                                                                                                                                                                                                                                                                                                                                                                                                                                                                         | Lighthouse Lab in Alderley Park                                                                    | Wellcome Sanger Institute for the COVID-19 Genomics UK (COG-UK) Consortium                                                                                                                                                                                                                                    | Jacquelyn Wynn, Mairead Hyland, The Lighthouse Lab in Alderley Park and Alex Alderton, Roberto Amato, Jeffrey Barrett, Sonia Goncalves, Ewan Harrison, David K. Jackson, Ian Johnston, Dominic Kwiatkowski, Cordelia Langford, John Sillitoe on behalf of the Wellcome Sanger Institute COVID-19 Surveillance Team           |
| EPI_ISL_1114800                                                                                                                                                                                                                                                                                                                                                                                                                                                                                                                                                                                                                                                                                                         | Lighthouse Lab in Glasgow                                                                          | Wellcome Sanger Institute for the COVID-19 Genomics UK (COG-UK) Consortium                                                                                                                                                                                                                                    | Harper VanSteenhouse, Yumi Kasai, David Gray, Carol Clugston, Anna Dominiczak and Alex Alderton, Roberto Amato, Jeffrey Barrett, Sonia Goncalves, Ewan Harrison, David K. Jackson, Ian Johnston, Dominic Kwiatkowski, Cordelia Langford, John Sillitoe on behalf of the Wellcome Sanger Institute COVID-19 Surveillance Team |

[illegible]

[illegible]



[illegible]

[illegible]

|                                                                                                                                                                                                                                                                                                                                                                                                                                                                                                                                                                                                                                                                                                                                                                                                                                                                                                                                                                                                                                                                                                                                                                                                                                                                                                                                                                                                                                                                                                                                                                                                                                                                                                                                                                                                                                                                                                                                                                                                                                                                                                                                                                                                                                                                                                                                                                                                                                                                                                                                                                                                                                                                                                                                                                                                                                                                                                                                                                                                                                                                                                                                                                                                                                                                                                                                                                                                                                                                                                                                                                                                                                                                                                                                                                                      |                                 |                                                                            | (COG-UK) Consortium                                                                                                                                                                                                                                                                                                          | Harrison, David K. Jackson, Ian Johnston, Dominic Kwiatkowski, Cordelia Langford, John Sillitoe on behalf of the Wellcome Sanger Institute COVID-19 Surveillance Team                                                                                                                                                        |
|--------------------------------------------------------------------------------------------------------------------------------------------------------------------------------------------------------------------------------------------------------------------------------------------------------------------------------------------------------------------------------------------------------------------------------------------------------------------------------------------------------------------------------------------------------------------------------------------------------------------------------------------------------------------------------------------------------------------------------------------------------------------------------------------------------------------------------------------------------------------------------------------------------------------------------------------------------------------------------------------------------------------------------------------------------------------------------------------------------------------------------------------------------------------------------------------------------------------------------------------------------------------------------------------------------------------------------------------------------------------------------------------------------------------------------------------------------------------------------------------------------------------------------------------------------------------------------------------------------------------------------------------------------------------------------------------------------------------------------------------------------------------------------------------------------------------------------------------------------------------------------------------------------------------------------------------------------------------------------------------------------------------------------------------------------------------------------------------------------------------------------------------------------------------------------------------------------------------------------------------------------------------------------------------------------------------------------------------------------------------------------------------------------------------------------------------------------------------------------------------------------------------------------------------------------------------------------------------------------------------------------------------------------------------------------------------------------------------------------------------------------------------------------------------------------------------------------------------------------------------------------------------------------------------------------------------------------------------------------------------------------------------------------------------------------------------------------------------------------------------------------------------------------------------------------------------------------------------------------------------------------------------------------------------------------------------------------------------------------------------------------------------------------------------------------------------------------------------------------------------------------------------------------------------------------------------------------------------------------------------------------------------------------------------------------------------------------------------------------------------------------------------------------------|---------------------------------|----------------------------------------------------------------------------|------------------------------------------------------------------------------------------------------------------------------------------------------------------------------------------------------------------------------------------------------------------------------------------------------------------------------|------------------------------------------------------------------------------------------------------------------------------------------------------------------------------------------------------------------------------------------------------------------------------------------------------------------------------|
| EPI_ISL_1115100                                                                                                                                                                                                                                                                                                                                                                                                                                                                                                                                                                                                                                                                                                                                                                                                                                                                                                                                                                                                                                                                                                                                                                                                                                                                                                                                                                                                                                                                                                                                                                                                                                                                                                                                                                                                                                                                                                                                                                                                                                                                                                                                                                                                                                                                                                                                                                                                                                                                                                                                                                                                                                                                                                                                                                                                                                                                                                                                                                                                                                                                                                                                                                                                                                                                                                                                                                                                                                                                                                                                                                                                                                                                                                                                                                      | Lighthouse Lab in Milton Keynes | Wellcome Sanger Institute for the COVID-19 Genomics UK (COG-UK) Consortium | The Lighthouse Lab in Milton Keynes and Alex Alderton, Roberto Amato, Jeffrey Barrett, Sonia Goncalves, Ewan Harrison, David K. Jackson, Ian Johnston, Dominic Kwiatkowski, Cordelia Langford, John Sillitoe on behalf of the Wellcome Sanger Institute COVID-19 Surveillance Team                                           |                                                                                                                                                                                                                                                                                                                              |
| EPI_ISL_1115102, EPI_ISL_1115105, EPI_ISL_1115110, EPI_ISL_1115114, EPI_ISL_1115115, EPI_ISL_1115116, EPI_ISL_1115117, EPI_ISL_1115118, EPI_ISL_1115119, EPI_ISL_1115121, EPI_ISL_1115122, EPI_ISL_1115124, EPI_ISL_1115125, EPI_ISL_1115127, EPI_ISL_1115128, EPI_ISL_1115131, EPI_ISL_1115134, EPI_ISL_1115135, EPI_ISL_1115136, EPI_ISL_1115137, EPI_ISL_1115138, EPI_ISL_1115139, EPI_ISL_1115140, EPI_ISL_1115143, EPI_ISL_1115145, EPI_ISL_1115147, EPI_ISL_1115148, EPI_ISL_1115149, EPI_ISL_1115153, EPI_ISL_1115154, EPI_ISL_1115156, EPI_ISL_1115157, EPI_ISL_1115159, EPI_ISL_1115161, EPI_ISL_1115162, EPI_ISL_1115163, EPI_ISL_1115164, EPI_ISL_1115165, EPI_ISL_1115166, EPI_ISL_1115167, EPI_ISL_1115168, EPI_ISL_1115169, EPI_ISL_1115171, EPI_ISL_1115172, EPI_ISL_1115174, EPI_ISL_1115175, EPI_ISL_1115176, EPI_ISL_1115177, EPI_ISL_1115178, EPI_ISL_1115179, EPI_ISL_1115180, EPI_ISL_1115181, EPI_ISL_1115182, EPI_ISL_1115183, EPI_ISL_1115184, EPI_ISL_1115186, EPI_ISL_1115187, EPI_ISL_1115190, EPI_ISL_1115191, EPI_ISL_1115192, EPI_ISL_1115195, EPI_ISL_1115198, EPI_ISL_1115199, EPI_ISL_1115202, EPI_ISL_1115203, EPI_ISL_1115204, EPI_ISL_1115205, EPI_ISL_1115207, EPI_ISL_1115208, EPI_ISL_1115210, EPI_ISL_1115211, EPI_ISL_1115213, EPI_ISL_1115214, EPI_ISL_1115215, EPI_ISL_1115216, EPI_ISL_1115218, EPI_ISL_1115219, EPI_ISL_1115220, EPI_ISL_1115224, EPI_ISL_1115225, EPI_ISL_1115228, EPI_ISL_1115229, EPI_ISL_1115230, EPI_ISL_1115231, EPI_ISL_1115232, EPI_ISL_1115233, EPI_ISL_1115234, EPI_ISL_1115236, EPI_ISL_1115239, EPI_ISL_1115240, EPI_ISL_1115241, EPI_ISL_1115242, EPI_ISL_1115243, EPI_ISL_1115244, EPI_ISL_1115245, EPI_ISL_1115248, EPI_ISL_1115249, EPI_ISL_1115250, EPI_ISL_1115252, EPI_ISL_1115253, EPI_ISL_1115255, EPI_ISL_1115256, EPI_ISL_1115257, EPI_ISL_1115258, EPI_ISL_1115259, EPI_ISL_1115261, EPI_ISL_1115262, EPI_ISL_1115263, EPI_ISL_1115265, EPI_ISL_1115266, EPI_ISL_1115267, EPI_ISL_1115268, EPI_ISL_1115269, EPI_ISL_1115270, EPI_ISL_1115271, EPI_ISL_1115272, EPI_ISL_1115273, EPI_ISL_1115274, EPI_ISL_1115275, EPI_ISL_1115276, EPI_ISL_1115277, EPI_ISL_1115278, EPI_ISL_1115279, EPI_ISL_1115280, EPI_ISL_1115281, EPI_ISL_1115283, EPI_ISL_1115284, EPI_ISL_1115285, EPI_ISL_1115286, EPI_ISL_1115288, EPI_ISL_1115289, EPI_ISL_1115290, EPI_ISL_1115292, EPI_ISL_1115293, EPI_ISL_1115294, EPI_ISL_1115295, EPI_ISL_1115297, EPI_ISL_1115299, EPI_ISL_1115301, EPI_ISL_1115302, EPI_ISL_1115303, EPI_ISL_1115306, EPI_ISL_1115307, EPI_ISL_1115310, EPI_ISL_1115311, EPI_ISL_1115312, EPI_ISL_1115313, EPI_ISL_1115314, EPI_ISL_1115315, EPI_ISL_1115316, EPI_ISL_1115317, EPI_ISL_1115318, EPI_ISL_1115319, EPI_ISL_1115321, EPI_ISL_1115322, EPI_ISL_1115323, EPI_ISL_1115324, EPI_ISL_1115329, EPI_ISL_1115330, EPI_ISL_1115331, EPI_ISL_1115335, EPI_ISL_1115336, EPI_ISL_1115337, EPI_ISL_1115338, EPI_ISL_1115339, EPI_ISL_1115340, EPI_ISL_1115342, EPI_ISL_1115343, EPI_ISL_1115344, EPI_ISL_1115345, EPI_ISL_1115346, EPI_ISL_1115347, EPI_ISL_1115349, EPI_ISL_1115352, EPI_ISL_1115353, EPI_ISL_1115354, EPI_ISL_1115355, EPI_ISL_1115356, EPI_ISL_1115357, EPI_ISL_1115358, EPI_ISL_1115359, EPI_ISL_1115361, EPI_ISL_1115362, EPI_ISL_1115363, EPI_ISL_1115364, EPI_ISL_1115365, EPI_ISL_1115367, EPI_ISL_1115368, EPI_ISL_1115369, EPI_ISL_1115370, EPI_ISL_1115371, EPI_ISL_1115373, EPI_ISL_1115374, EPI_ISL_1115375, EPI_ISL_1115376, EPI_ISL_1115377, EPI_ISL_1115378, EPI_ISL_1115379, EPI_ISL_1115382, EPI_ISL_1115384, EPI_ISL_1115385, EPI_ISL_1115386, EPI_ISL_1115387, EPI_ISL_1115388, EPI_ISL_1115389, EPI_ISL_1115391, EPI_ISL_1115393, EPI_ISL_1115394, EPI_ISL_1115396, EPI_ISL_1115397, EPI_ISL_1115398, EPI_ISL_1115399, EPI_ISL_1115400, EPI_ISL_1115401 | see above                       | Lighthouse Lab in Glasgow                                                  | Wellcome Sanger Institute for the COVID-19 Genomics UK (COG-UK) Consortium                                                                                                                                                                                                                                                   | Harper VanSteenhouse, Yumi Kasai, David Gray, Carol Clugston, Anna Dominiczak and Alex Alderton, Roberto Amato, Jeffrey Barrett, Sonia Goncalves, Ewan Harrison, David K. Jackson, Ian Johnston, Dominic Kwiatkowski, Cordelia Langford, John Sillitoe on behalf of the Wellcome Sanger Institute COVID-19 Surveillance Team |
| EPI_ISL_1115402, EPI_ISL_1115406, EPI_ISL_1115408, EPI_ISL_1115409, EPI_ISL_1115411                                                                                                                                                                                                                                                                                                                                                                                                                                                                                                                                                                                                                                                                                                                                                                                                                                                                                                                                                                                                                                                                                                                                                                                                                                                                                                                                                                                                                                                                                                                                                                                                                                                                                                                                                                                                                                                                                                                                                                                                                                                                                                                                                                                                                                                                                                                                                                                                                                                                                                                                                                                                                                                                                                                                                                                                                                                                                                                                                                                                                                                                                                                                                                                                                                                                                                                                                                                                                                                                                                                                                                                                                                                                                                  | Lighthouse Lab in Cambridge     | Wellcome Sanger Institute for the COVID-19 Genomics UK (COG-UK) Consortium | Rob Howes, The Lighthouse Lab in Cambridge and Alex Alderton, Roberto Amato, Jeffrey Barrett, Sonia Goncalves, Ewan Harrison, David K. Jackson, Ian Johnston, Dominic Kwiatkowski, Cordelia Langford, John Sillitoe on behalf of the Wellcome Sanger Institute COVID-19 Surveillance Team                                    |                                                                                                                                                                                                                                                                                                                              |
| EPI_ISL_1115412, EPI_ISL_1115415, EPI_ISL_1115420, EPI_ISL_1115421, EPI_ISL_1115422                                                                                                                                                                                                                                                                                                                                                                                                                                                                                                                                                                                                                                                                                                                                                                                                                                                                                                                                                                                                                                                                                                                                                                                                                                                                                                                                                                                                                                                                                                                                                                                                                                                                                                                                                                                                                                                                                                                                                                                                                                                                                                                                                                                                                                                                                                                                                                                                                                                                                                                                                                                                                                                                                                                                                                                                                                                                                                                                                                                                                                                                                                                                                                                                                                                                                                                                                                                                                                                                                                                                                                                                                                                                                                  | Lighthouse Lab in Glasgow       | Wellcome Sanger Institute for the COVID-19 Genomics UK (COG-UK) Consortium | Harper VanSteenhouse, Yumi Kasai, David Gray, Carol Clugston, Anna Dominiczak and Alex Alderton, Roberto Amato, Jeffrey Barrett, Sonia Goncalves, Ewan Harrison, David K. Jackson, Ian Johnston, Dominic Kwiatkowski, Cordelia Langford, John Sillitoe on behalf of the Wellcome Sanger Institute COVID-19 Surveillance Team |                                                                                                                                                                                                                                                                                                                              |
| EPI_ISL_1115423, EPI_ISL_1115425                                                                                                                                                                                                                                                                                                                                                                                                                                                                                                                                                                                                                                                                                                                                                                                                                                                                                                                                                                                                                                                                                                                                                                                                                                                                                                                                                                                                                                                                                                                                                                                                                                                                                                                                                                                                                                                                                                                                                                                                                                                                                                                                                                                                                                                                                                                                                                                                                                                                                                                                                                                                                                                                                                                                                                                                                                                                                                                                                                                                                                                                                                                                                                                                                                                                                                                                                                                                                                                                                                                                                                                                                                                                                                                                                     | Lighthouse Lab in Cambridge     | Wellcome Sanger Institute for the COVID-19 Genomics UK (COG-UK) Consortium | Rob Howes, The Lighthouse Lab in Cambridge and Alex Alderton, Roberto Amato, Jeffrey Barrett, Sonia Goncalves, Ewan Harrison, David K. Jackson, Ian Johnston, Dominic Kwiatkowski, Cordelia Langford, John Sillitoe on behalf of the Wellcome Sanger Institute COVID-19 Surveillance Team                                    |                                                                                                                                                                                                                                                                                                                              |
| EPI_ISL_1115426, EPI_ISL_1115427, EPI_ISL_1115428, EPI_ISL_1115429                                                                                                                                                                                                                                                                                                                                                                                                                                                                                                                                                                                                                                                                                                                                                                                                                                                                                                                                                                                                                                                                                                                                                                                                                                                                                                                                                                                                                                                                                                                                                                                                                                                                                                                                                                                                                                                                                                                                                                                                                                                                                                                                                                                                                                                                                                                                                                                                                                                                                                                                                                                                                                                                                                                                                                                                                                                                                                                                                                                                                                                                                                                                                                                                                                                                                                                                                                                                                                                                                                                                                                                                                                                                                                                   | Lighthouse Lab in Glasgow       | Wellcome Sanger Institute for the COVID-19 Genomics UK (COG-UK) Consortium | Harper VanSteenhouse, Yumi Kasai, David Gray, Carol Clugston, Anna Dominiczak and Alex Alderton, Roberto Amato, Jeffrey Barrett, Sonia Goncalves, Ewan Harrison, David K. Jackson, Ian Johnston, Dominic Kwiatkowski, Cordelia Langford, John Sillitoe on behalf of the Wellcome Sanger Institute COVID-19 Surveillance Team |                                                                                                                                                                                                                                                                                                                              |
| EPI_ISL_1115430                                                                                                                                                                                                                                                                                                                                                                                                                                                                                                                                                                                                                                                                                                                                                                                                                                                                                                                                                                                                                                                                                                                                                                                                                                                                                                                                                                                                                                                                                                                                                                                                                                                                                                                                                                                                                                                                                                                                                                                                                                                                                                                                                                                                                                                                                                                                                                                                                                                                                                                                                                                                                                                                                                                                                                                                                                                                                                                                                                                                                                                                                                                                                                                                                                                                                                                                                                                                                                                                                                                                                                                                                                                                                                                                                                      | Lighthouse Lab in Cambridge     | Wellcome Sanger Institute for the COVID-19 Genomics UK (COG-UK) Consortium | Rob Howes, The Lighthouse Lab in Cambridge and Alex Alderton, Roberto Amato, Jeffrey Barrett, Sonia Goncalves, Ewan Harrison, David K. Jackson, Ian Johnston, Dominic Kwiatkowski, Cordelia Langford, John Sillitoe on behalf of the Wellcome Sanger Institute COVID-19 Surveillance Team                                    |                                                                                                                                                                                                                                                                                                                              |
| EPI_ISL_1115433, EPI_ISL_1115434, EPI_ISL_1115435, EPI_ISL_1115436, EPI_ISL_1115437                                                                                                                                                                                                                                                                                                                                                                                                                                                                                                                                                                                                                                                                                                                                                                                                                                                                                                                                                                                                                                                                                                                                                                                                                                                                                                                                                                                                                                                                                                                                                                                                                                                                                                                                                                                                                                                                                                                                                                                                                                                                                                                                                                                                                                                                                                                                                                                                                                                                                                                                                                                                                                                                                                                                                                                                                                                                                                                                                                                                                                                                                                                                                                                                                                                                                                                                                                                                                                                                                                                                                                                                                                                                                                  | Lighthouse Lab in Glasgow       | Wellcome Sanger Institute for the COVID-19 Genomics UK (COG-UK) Consortium | Harper VanSteenhouse, Yumi Kasai, David Gray, Carol Clugston, Anna Dominiczak                                                                                                                                                                                                                                                |                                                                                                                                                                                                                                                                                                                              |

[illegible]

[illegible]

[illegible]



EPI\_ISL\_1116840, EPI\_ISL\_1116841, EPI\_ISL\_1116842, EPI\_ISL\_1116843, EPI\_ISL\_1116844, EPI\_ISL\_1116845, EPI\_ISL\_1116846, EPI\_ISL\_1116847, EPI\_ISL\_1116848, EPI\_ISL\_1116849, EPI\_ISL\_1116850, EPI\_ISL\_1116851, EPI\_ISL\_1116852, EPI\_ISL\_1116853, EPI\_ISL\_1116854, EPI\_ISL\_1116855, EPI\_ISL\_1116856, EPI\_ISL\_1116859

[illegible]



|                                                                                                                                                                                                                                                                                                                                                                                                                                                                                                                              |                                                                                                  |                                                                                                        |                                                                                                                                                                                                      |
|------------------------------------------------------------------------------------------------------------------------------------------------------------------------------------------------------------------------------------------------------------------------------------------------------------------------------------------------------------------------------------------------------------------------------------------------------------------------------------------------------------------------------|--------------------------------------------------------------------------------------------------|--------------------------------------------------------------------------------------------------------|------------------------------------------------------------------------------------------------------------------------------------------------------------------------------------------------------|
| EPI_ISL_1117496                                                                                                                                                                                                                                                                                                                                                                                                                                                                                                              | USCA PESCHINA                                                                                    | Istituto Zooprofilattico Sperimentale dell'Abruzzo e Molise "G. Caporale"                              | Lorusso A, Marcacci M, Di Domenico M, Ancora M, Curini V, Mangone I, Rinaldi A, Scialabba S, Di Pasquale A, Cammà C, Scialabba S, Puglia I, Calistri P, Savini G                                     |
| EPI_ISL_1117497                                                                                                                                                                                                                                                                                                                                                                                                                                                                                                              | SIESP CHIETI, DRIVE IN ORTONA                                                                    | Istituto Zooprofilattico Sperimentale dell'Abruzzo e Molise "G. Caporale"                              | Lorusso A, Marcacci M, Di Domenico M, Ancora M, Curini V, Mangone I, Rinaldi A, Scialabba S, Di Pasquale A, Cammà C, Scialabba S, Puglia I, Calistri P, Savini G                                     |
| EPI_ISL_1117498                                                                                                                                                                                                                                                                                                                                                                                                                                                                                                              | PRESIDIO TERRITORIALE CASOLI                                                                     | Istituto Zooprofilattico Sperimentale dell'Abruzzo e Molise "G. Caporale"                              | Lorusso A, Marcacci M, Di Domenico M, Ancora M, Curini V, Mangone I, Rinaldi A, Scialabba S, Di Pasquale A, Cammà C, Scialabba S, Puglia I, Calistri P, Savini G                                     |
| EPI_ISL_1117499                                                                                                                                                                                                                                                                                                                                                                                                                                                                                                              | SIESP CHIETI, DRIVE IN VASTO                                                                     | Istituto Zooprofilattico Sperimentale dell'Abruzzo e Molise "G. Caporale"                              | Lorusso A, Marcacci M, Di Domenico M, Ancora M, Curini V, Mangone I, Rinaldi A, Scialabba S, Di Pasquale A, Cammà C, Scialabba S, Puglia I, Calistri P, Savini G                                     |
| EPI_ISL_1117500                                                                                                                                                                                                                                                                                                                                                                                                                                                                                                              | SIESP CHIETI, DRIVE IN ORTONA                                                                    | Istituto Zooprofilattico Sperimentale dell'Abruzzo e Molise "G. Caporale"                              | Lorusso A, Marcacci M, Di Domenico M, Ancora M, Curini V, Mangone I, Rinaldi A, Scialabba S, Di Pasquale A, Cammà C, Scialabba S, Puglia I, Calistri P, Savini G                                     |
| EPI_ISL_1117507                                                                                                                                                                                                                                                                                                                                                                                                                                                                                                              | SIESP CHIETI, DRIVE IN LANCIANO                                                                  | Istituto Zooprofilattico Sperimentale dell'Abruzzo e Molise "G. Caporale"                              | Lorusso A, Marcacci M, Di Domenico M, Ancora M, Curini V, Mangone I, Rinaldi A, Scialabba S, Di Pasquale A, Cammà C, Scialabba S, Puglia I, Calistri P, Savini G                                     |
| EPI_ISL_1117514                                                                                                                                                                                                                                                                                                                                                                                                                                                                                                              | PRES OSP SAN LIBERATORE                                                                          | Istituto Zooprofilattico Sperimentale dell'Abruzzo e Molise "G. Caporale"                              | Lorusso A, Marcacci M, Di Domenico M, Ancora M, Curini V, Mangone I, Rinaldi A, Scialabba S, Di Pasquale A, Cammà C, Scialabba S, Puglia I, Calistri P, Savini G                                     |
| EPI_ISL_1117517                                                                                                                                                                                                                                                                                                                                                                                                                                                                                                              | SIESP CHIETI, DRIVE IN ORTONA                                                                    | Istituto Zooprofilattico Sperimentale dell'Abruzzo e Molise "G. Caporale"                              | Lorusso A, Marcacci M, Di Domenico M, Ancora M, Curini V, Mangone I, Rinaldi A, Scialabba S, Di Pasquale A, Cammà C, Scialabba S, Puglia I, Calistri P, Savini G                                     |
| EPI_ISL_1117519                                                                                                                                                                                                                                                                                                                                                                                                                                                                                                              | SIESP CHIETI, DRIVE IN CHIETI                                                                    | Istituto Zooprofilattico Sperimentale dell'Abruzzo e Molise "G. Caporale"                              | Lorusso A, Marcacci M, Di Domenico M, Ancora M, Curini V, Mangone I, Rinaldi A, Scialabba S, Di Pasquale A, Cammà C, Scialabba S, Puglia I, Calistri P, Savini G                                     |
| EPI_ISL_1117520                                                                                                                                                                                                                                                                                                                                                                                                                                                                                                              | USCA AVEZZANO                                                                                    | Istituto Zooprofilattico Sperimentale dell'Abruzzo e Molise "G. Caporale"                              | Lorusso A, Marcacci M, Di Domenico M, Ancora M, Curini V, Mangone I, Rinaldi A, Scialabba S, Di Pasquale A, Cammà C, Scialabba S, Puglia I, Calistri P, Savini G                                     |
| EPI_ISL_1117524                                                                                                                                                                                                                                                                                                                                                                                                                                                                                                              | SIESP DIP PREV TERAMO                                                                            | Istituto Zooprofilattico Sperimentale dell'Abruzzo e Molise "G. Caporale"                              | Lorusso A, Marcacci M, Di Domenico M, Ancora M, Curini V, Mangone I, Rinaldi A, Scialabba S, Di Pasquale A, Cammà C, Scialabba S, Puglia I, Calistri P, Savini G                                     |
| EPI_ISL_1117526                                                                                                                                                                                                                                                                                                                                                                                                                                                                                                              | IZS TERAMO                                                                                       | Istituto Zooprofilattico Sperimentale dell'Abruzzo e Molise "G. Caporale"                              | Lorusso A, Marcacci M, Di Domenico M, Ancora M, Curini V, Mangone I, Rinaldi A, Scialabba S, Di Pasquale A, Cammà C, Scialabba S, Puglia I, Calistri P, Savini G                                     |
| EPI_ISL_1117529, EPI_ISL_1117531, EPI_ISL_1117532, EPI_ISL_1117534, EPI_ISL_1117540, EPI_ISL_1117542, EPI_ISL_1117543, EPI_ISL_1117544, EPI_ISL_1117545, EPI_ISL_1117546, EPI_ISL_1117547, EPI_ISL_1117553, EPI_ISL_1117554, EPI_ISL_1117556, EPI_ISL_1117557, EPI_ISL_1117558, EPI_ISL_1117562, EPI_ISL_1117563, EPI_ISL_1117564, EPI_ISL_1117565, EPI_ISL_1117566, EPI_ISL_1117568, EPI_ISL_1117569, EPI_ISL_1117574, EPI_ISL_1117576, EPI_ISL_1117577, EPI_ISL_1117578, EPI_ISL_1117581, EPI_ISL_1117584, EPI_ISL_1117587 |                                                                                                  |                                                                                                        |                                                                                                                                                                                                      |
| see above                                                                                                                                                                                                                                                                                                                                                                                                                                                                                                                    | Hospital Universitari Joan XXIII de Tarragona                                                    | Hospital Universitari Vall d'Hebron                                                                    | Cristina Andrés, María Piñana, Josep F Abril, Damir Garcia-Cehic, Ariadna Rando, Juliana Esperalba, María Gema Codina, Carla Castillo, María Carmen Martín, Tomàs Pumarola, Josep Quer, Andrés Antón |
| EPI_ISL_1117673                                                                                                                                                                                                                                                                                                                                                                                                                                                                                                              | SIESP DIP PREV TERAMO                                                                            | Istituto Zooprofilattico Sperimentale dell'Abruzzo e Molise "G. Caporale"                              | Lorusso A, Marcacci M, Di Domenico M, Ancora M, Curini V, Mangone I, Rinaldi A, Scialabba S, Di Pasquale A, Cammà C, Puglia I, Calistri P, Savini G                                                  |
| EPI_ISL_1117676                                                                                                                                                                                                                                                                                                                                                                                                                                                                                                              | SIESP CHIETI, DRIVE IN LANCIANO                                                                  | Istituto Zooprofilattico Sperimentale dell'Abruzzo e Molise "G. Caporale"                              | Lorusso A, Marcacci M, Di Domenico M, Ancora M, Curini V, Mangone I, Rinaldi A, Scialabba S, Di Pasquale A, Cammà C, Puglia I, Calistri P, Savini G                                                  |
| EPI_ISL_1117677                                                                                                                                                                                                                                                                                                                                                                                                                                                                                                              | USCA CASTEL DI SANGRO                                                                            | Istituto Zooprofilattico Sperimentale dell'Abruzzo e Molise "G. Caporale"                              | Lorusso A, Marcacci M, Di Domenico M, Ancora M, Curini V, Mangone I, Rinaldi A, Scialabba S, Di Pasquale A, Cammà C, Puglia I, Calistri P, Savini G                                                  |
| EPI_ISL_1117679                                                                                                                                                                                                                                                                                                                                                                                                                                                                                                              | SIESP CHIETI, DRIVE IN VASTO                                                                     | Istituto Zooprofilattico Sperimentale dell'Abruzzo e Molise "G. Caporale"                              | Lorusso A, Marcacci M, Di Domenico M, Ancora M, Curini V, Mangone I, Rinaldi A, Scialabba S, Di Pasquale A, Cammà C, Puglia I, Calistri P, Savini G                                                  |
| EPI_ISL_1117682                                                                                                                                                                                                                                                                                                                                                                                                                                                                                                              | SIESP CHIETI, DRIVE IN LANCIANO                                                                  | Istituto Zooprofilattico Sperimentale dell'Abruzzo e Molise "G. Caporale"                              | Lorusso A, Marcacci M, Di Domenico M, Ancora M, Curini V, Mangone I, Rinaldi A, Scialabba S, Di Pasquale A, Cammà C, Puglia I, Calistri P, Savini G                                                  |
| EPI_ISL_1117683, EPI_ISL_1117684                                                                                                                                                                                                                                                                                                                                                                                                                                                                                             | USCA CASTEL DI SANGRO                                                                            | Istituto Zooprofilattico Sperimentale dell'Abruzzo e Molise "G. Caporale"                              | Lorusso A, Marcacci M, Di Domenico M, Ancora M, Curini V, Mangone I, Rinaldi A, Scialabba S, Di Pasquale A, Cammà C, Puglia I, Calistri P, Savini G                                                  |
| EPI_ISL_1117685                                                                                                                                                                                                                                                                                                                                                                                                                                                                                                              | SIESP DIP PREV TERAMO                                                                            | Istituto Zooprofilattico Sperimentale dell'Abruzzo e Molise "G. Caporale"                              | Lorusso A, Marcacci M, Di Domenico M, Ancora M, Curini V, Mangone I, Rinaldi A, Scialabba S, Di Pasquale A, Cammà C, Puglia I, Calistri P, Savini G                                                  |
| EPI_ISL_1117688                                                                                                                                                                                                                                                                                                                                                                                                                                                                                                              | SIESP DIP PREV CHIETI                                                                            | Istituto Zooprofilattico Sperimentale dell'Abruzzo e Molise "G. Caporale"                              | Lorusso A, Marcacci M, Di Domenico M, Ancora M, Curini V, Mangone I, Rinaldi A, Scialabba S, Di Pasquale A, Cammà C, Puglia I, Calistri P, Savini G                                                  |
| EPI_ISL_1117689                                                                                                                                                                                                                                                                                                                                                                                                                                                                                                              | SIESP CHIETI, DRIVE IN LANCIANO                                                                  | Istituto Zooprofilattico Sperimentale dell'Abruzzo e Molise "G. Caporale"                              | Lorusso A, Marcacci M, Di Domenico M, Ancora M, Curini V, Mangone I, Rinaldi A, Scialabba S, Di Pasquale A, Cammà C, Puglia I, Calistri P, Savini G                                                  |
| EPI_ISL_1117691                                                                                                                                                                                                                                                                                                                                                                                                                                                                                                              | SIESP DIP PREV TERAMO                                                                            | Istituto Zooprofilattico Sperimentale dell'Abruzzo e Molise "G. Caporale"                              | Lorusso A, Marcacci M, Di Domenico M, Ancora M, Curini V, Mangone I, Rinaldi A, Scialabba S, Di Pasquale A, Cammà C, Puglia I, Calistri P, Savini G                                                  |
| EPI_ISL_1117692                                                                                                                                                                                                                                                                                                                                                                                                                                                                                                              | PRESIDIO OSP SAN LIBERATORE                                                                      | Istituto Zooprofilattico Sperimentale dell'Abruzzo e Molise "G. Caporale"                              | Lorusso A, Marcacci M, Di Domenico M, Ancora M, Curini V, Mangone I, Rinaldi A, Scialabba S, Di Pasquale A, Cammà C, Puglia I, Calistri P, Savini G                                                  |
| EPI_ISL_1117694                                                                                                                                                                                                                                                                                                                                                                                                                                                                                                              | SIESP CHIETI, DRIVE IN LANCIANO                                                                  | Istituto Zooprofilattico Sperimentale dell'Abruzzo e Molise "G. Caporale"                              | Lorusso A, Marcacci M, Di Domenico M, Ancora M, Curini V, Mangone I, Rinaldi A, Scialabba S, Di Pasquale A, Cammà C, Puglia I, Calistri P, Savini G                                                  |
| EPI_ISL_1117710, EPI_ISL_1117711, EPI_ISL_1117713, EPI_ISL_1117714, EPI_ISL_1117715, EPI_ISL_1117716                                                                                                                                                                                                                                                                                                                                                                                                                         | National Virus Reference Laboratory                                                              | National Virus Reference Laboratory                                                                    | Zoe Yandle, Gabriel Gonzalez, Michael Carr, Jonathan Dean, Cillian F De Gascun                                                                                                                       |
| EPI_ISL_1117717                                                                                                                                                                                                                                                                                                                                                                                                                                                                                                              | National Virus Reference Laboratory                                                              | National Virus Reference Laboratory                                                                    | Guerrino Macori, Gabriel Gonzalez, Michael Carr, Zoe Yandle, Jonathan Dean, Seamus Fanning, Cillian F De Gascun                                                                                      |
| EPI_ISL_1117718, EPI_ISL_1117719, EPI_ISL_1117720, EPI_ISL_1117721, EPI_ISL_1117723, EPI_ISL_1117724, EPI_ISL_1117726, EPI_ISL_1117727, EPI_ISL_1117730, EPI_ISL_1117732, EPI_ISL_1117733, EPI_ISL_1117736                                                                                                                                                                                                                                                                                                                   | National Virus Reference Laboratory                                                              | National Virus Reference Laboratory                                                                    | Zoe Yandle, Gabriel Gonzalez, Michael Carr, Jonathan Dean, Cillian F De Gascun                                                                                                                       |
| see above                                                                                                                                                                                                                                                                                                                                                                                                                                                                                                                    | National Virus Reference Laboratory                                                              | National Virus Reference Laboratory                                                                    | Guerrino Macori, Gabriel Gonzalez, Michael Carr, Zoe Yandle, Jonathan Dean, Seamus Fanning, Cillian F De Gascun                                                                                      |
| EPI_ISL_1117737                                                                                                                                                                                                                                                                                                                                                                                                                                                                                                              | National Virus Reference Laboratory                                                              | National Virus Reference Laboratory                                                                    | Zoe Yandle, Gabriel Gonzalez, Michael Carr, Jonathan Dean, Cillian F De Gascun                                                                                                                       |
| EPI_ISL_1117740, EPI_ISL_1117742, EPI_ISL_1117743, EPI_ISL_1117744, EPI_ISL_1117745, EPI_ISL_1117746, EPI_ISL_1117747, EPI_ISL_1117748, EPI_ISL_1117749, EPI_ISL_1117750, EPI_ISL_1117751, EPI_ISL_1117752, EPI_ISL_1117753, EPI_ISL_1117755, EPI_ISL_1117756                                                                                                                                                                                                                                                                | National Virus Reference Laboratory                                                              | National Virus Reference Laboratory                                                                    | Guerrino Macori, Gabriel Gonzalez, Michael Carr, Zoe Yandle, Jonathan Dean, Seamus Fanning, Cillian F De Gascun                                                                                      |
| see above                                                                                                                                                                                                                                                                                                                                                                                                                                                                                                                    | National Virus Reference Laboratory                                                              | National Virus Reference Laboratory                                                                    | Zoe Yandle, Gabriel Gonzalez, Michael Carr, Jonathan Dean, Cillian F De Gascun                                                                                                                       |
| EPI_ISL_1117757                                                                                                                                                                                                                                                                                                                                                                                                                                                                                                              | National Virus Reference Laboratory                                                              | National Virus Reference Laboratory                                                                    | Guerrino Macori, Gabriel Gonzalez, Michael Carr, Zoe Yandle, Jonathan Dean, Seamus Fanning, Cillian F De Gascun                                                                                      |
| EPI_ISL_1117760, EPI_ISL_1117761, EPI_ISL_1117767, EPI_ISL_1117771, EPI_ISL_1117772                                                                                                                                                                                                                                                                                                                                                                                                                                          | National Virus Reference Laboratory                                                              | National Virus Reference Laboratory                                                                    | Zoe Yandle, Gabriel Gonzalez, Michael Carr, Jonathan Dean, Cillian F De Gascun                                                                                                                       |
| EPI_ISL_1117817, EPI_ISL_1117818, EPI_ISL_1117819, EPI_ISL_1117820                                                                                                                                                                                                                                                                                                                                                                                                                                                           | Center for Virology, Medical University of Vienna                                                | Bergthaler laboratory, CeMM Research Center for Molecular Medicine of the Austrian Academy of Sciences | Lukas Endler, Anna Schedl, Thomas Penz, Benedikt Agerer, Maëlle Le Moing, Michael Schuster, Bekir Erguner, Jan Laine, Martin Senekowitsch, Christoph Bock, Andreas Bergthaler                        |
| EPI_ISL_1117821                                                                                                                                                                                                                                                                                                                                                                                                                                                                                                              | Department of Laboratory Medicine, Division of Clinical Virology, University of Medicine, Vienna | Bergthaler laboratory, CeMM Research Center for Molecular Medicine of the Austrian Academy of Sciences | Lukas Endler, Anna Schedl, Thomas Penz, Benedikt Agerer, Maëlle Le Moing, Michael Schuster, Bekir Erguner, Jan Laine, Martin Senekowitsch, Christoph Bock, Andreas Bergthaler                        |

|                                                                                                                                                                                                                                                                                                                                                                                                                                                                                                                                                                                                                                                                                                        |                                                                                                                     |                                                                                                         |                                                                                                                                                                                                                                                                                                                                                                                                                                                  |
|--------------------------------------------------------------------------------------------------------------------------------------------------------------------------------------------------------------------------------------------------------------------------------------------------------------------------------------------------------------------------------------------------------------------------------------------------------------------------------------------------------------------------------------------------------------------------------------------------------------------------------------------------------------------------------------------------------|---------------------------------------------------------------------------------------------------------------------|---------------------------------------------------------------------------------------------------------|--------------------------------------------------------------------------------------------------------------------------------------------------------------------------------------------------------------------------------------------------------------------------------------------------------------------------------------------------------------------------------------------------------------------------------------------------|
| EPI_ISL_1117822, EPI_ISL_1117823                                                                                                                                                                                                                                                                                                                                                                                                                                                                                                                                                                                                                                                                       | Center for Virology, Medical University of Vienna                                                                   | Berghthaler laboratory, CeMM Research Center for Molecular Medicine of the Austrian Academy of Sciences | Lukas Endler, Anna Schedl, Thomas Penz, Benedikt Agerer, Maelle Le Moing, Michael Schuster, Bekir Erguner, Jan Laine, Martin Senekowitsch, Christoph Bock, Andreas Berghthaler                                                                                                                                                                                                                                                                   |
| EPI_ISL_1117824, EPI_ISL_1117825, EPI_ISL_1117826, EPI_ISL_1117827, EPI_ISL_1117828, EPI_ISL_1117829, EPI_ISL_1117830                                                                                                                                                                                                                                                                                                                                                                                                                                                                                                                                                                                  | Austrian Agency for Health and Food Safety (AGES)                                                                   | Berghthaler laboratory, CeMM Research Center for Molecular Medicine of the Austrian Academy of Sciences | Lukas Endler, Anna Schedl, Thomas Penz, Benedikt Agerer, Maelle Le Moing, Michael Schuster, Bekir Erguner, Jan Laine, Martin Senekowitsch, Christoph Bock, Andreas Berghthaler                                                                                                                                                                                                                                                                   |
| EPI_ISL_1117836, EPI_ISL_1117837                                                                                                                                                                                                                                                                                                                                                                                                                                                                                                                                                                                                                                                                       | Center for Virology, Medical University of Vienna                                                                   | Berghthaler laboratory, CeMM Research Center for Molecular Medicine of the Austrian Academy of Sciences | Lukas Endler, Anna Schedl, Thomas Penz, Benedikt Agerer, Maelle Le Moing, Michael Schuster, Bekir Erguner, Jan Laine, Martin Senekowitsch, Christoph Bock, Andreas Berghthaler                                                                                                                                                                                                                                                                   |
| EPI_ISL_1117838, EPI_ISL_1117839                                                                                                                                                                                                                                                                                                                                                                                                                                                                                                                                                                                                                                                                       | Austrian Agency for Health and Food Safety (AGES)                                                                   | Berghthaler laboratory, CeMM Research Center for Molecular Medicine of the Austrian Academy of Sciences | Lukas Endler, Anna Schedl, Thomas Penz, Benedikt Agerer, Maelle Le Moing, Michael Schuster, Bekir Erguner, Jan Laine, Martin Senekowitsch, Christoph Bock, Andreas Berghthaler                                                                                                                                                                                                                                                                   |
| EPI_ISL_1117847                                                                                                                                                                                                                                                                                                                                                                                                                                                                                                                                                                                                                                                                                        | Institut für Pathologie, Salzkammergut Klinikum Vöcklabruck                                                         | Berghthaler laboratory, CeMM Research Center for Molecular Medicine of the Austrian Academy of Sciences | Lukas Endler, Anna Schedl, Thomas Penz, Benedikt Agerer, Maelle Le Moing, Michael Schuster, Bekir Erguner, Jan Laine, Martin Senekowitsch, Christoph Bock, Andreas Berghthaler                                                                                                                                                                                                                                                                   |
| EPI_ISL_1117848, EPI_ISL_1117849, EPI_ISL_1117850, EPI_ISL_1117851, EPI_ISL_1117852, EPI_ISL_1117853                                                                                                                                                                                                                                                                                                                                                                                                                                                                                                                                                                                                   | Center for Virology, Medical University of Vienna                                                                   | Berghthaler laboratory, CeMM Research Center for Molecular Medicine of the Austrian Academy of Sciences | Lukas Endler, Anna Schedl, Thomas Penz, Benedikt Agerer, Maelle Le Moing, Michael Schuster, Bekir Erguner, Jan Laine, Martin Senekowitsch, Christoph Bock, Andreas Berghthaler                                                                                                                                                                                                                                                                   |
| EPI_ISL_1117854, EPI_ISL_1117855, EPI_ISL_1117856, EPI_ISL_1117857, EPI_ISL_1117858, EPI_ISL_1117859, EPI_ISL_1117860, EPI_ISL_1117861, EPI_ISL_1117862, EPI_ISL_1117863, EPI_ISL_1117864, EPI_ISL_1117865, EPI_ISL_1117866, EPI_ISL_1117867, EPI_ISL_1117869                                                                                                                                                                                                                                                                                                                                                                                                                                          |                                                                                                                     |                                                                                                         |                                                                                                                                                                                                                                                                                                                                                                                                                                                  |
| see above                                                                                                                                                                                                                                                                                                                                                                                                                                                                                                                                                                                                                                                                                              | Austrian Agency for Health and Food Safety (AGES)                                                                   | Berghthaler laboratory, CeMM Research Center for Molecular Medicine of the Austrian Academy of Sciences | Lukas Endler, Anna Schedl, Thomas Penz, Benedikt Agerer, Maelle Le Moing, Michael Schuster, Bekir Erguner, Jan Laine, Martin Senekowitsch, Christoph Bock, Andreas Berghthaler                                                                                                                                                                                                                                                                   |
| EPI_ISL_1117873, EPI_ISL_1117875                                                                                                                                                                                                                                                                                                                                                                                                                                                                                                                                                                                                                                                                       | Tauernklinikum - Standort Zell am See                                                                               | Berghthaler laboratory, CeMM Research Center for Molecular Medicine of the Austrian Academy of Sciences | Lukas Endler, Anna Schedl, Thomas Penz, Benedikt Agerer, Maelle Le Moing, Michael Schuster, Bekir Erguner, Jan Laine, Martin Senekowitsch, Christoph Bock, Andreas Berghthaler                                                                                                                                                                                                                                                                   |
| EPI_ISL_1117876, EPI_ISL_1117877, EPI_ISL_1117878, EPI_ISL_1117879, EPI_ISL_1117880, EPI_ISL_1117881, EPI_ISL_1117886                                                                                                                                                                                                                                                                                                                                                                                                                                                                                                                                                                                  | Center for Virology, Medical University of Vienna                                                                   | Berghthaler laboratory, CeMM Research Center for Molecular Medicine of the Austrian Academy of Sciences | Lukas Endler, Anna Schedl, Thomas Penz, Benedikt Agerer, Maelle Le Moing, Michael Schuster, Bekir Erguner, Jan Laine, Martin Senekowitsch, Christoph Bock, Andreas Berghthaler                                                                                                                                                                                                                                                                   |
| EPI_ISL_1117887                                                                                                                                                                                                                                                                                                                                                                                                                                                                                                                                                                                                                                                                                        | Austrian Agency for Health and Food Safety (AGES)                                                                   | Berghthaler laboratory, CeMM Research Center for Molecular Medicine of the Austrian Academy of Sciences | Lukas Endler, Anna Schedl, Thomas Penz, Benedikt Agerer, Maelle Le Moing, Michael Schuster, Bekir Erguner, Jan Laine, Martin Senekowitsch, Christoph Bock, Andreas Berghthaler                                                                                                                                                                                                                                                                   |
| EPI_ISL_1117926                                                                                                                                                                                                                                                                                                                                                                                                                                                                                                                                                                                                                                                                                        | Center for Virology, Medical University of Vienna                                                                   | Berghthaler laboratory, CeMM Research Center for Molecular Medicine of the Austrian Academy of Sciences | Lukas Endler, Anna Schedl, Thomas Penz, Benedikt Agerer, Maelle Le Moing, Michael Schuster, Bekir Erguner, Jan Laine, Martin Senekowitsch, Christoph Bock, Andreas Berghthaler                                                                                                                                                                                                                                                                   |
| EPI_ISL_1118029, EPI_ISL_1118030, EPI_ISL_1118035, EPI_ISL_1118038, EPI_ISL_1118049                                                                                                                                                                                                                                                                                                                                                                                                                                                                                                                                                                                                                    | Austrian Agency for Health and Food Safety (AGES)                                                                   | Berghthaler laboratory, CeMM Research Center for Molecular Medicine of the Austrian Academy of Sciences | Lukas Endler, Anna Schedl, Thomas Penz, Benedikt Agerer, Maelle Le Moing, Michael Schuster, Bekir Erguner, Jan Laine, Martin Senekowitsch, Christoph Bock, Andreas Berghthaler                                                                                                                                                                                                                                                                   |
| EPI_ISL_1118064                                                                                                                                                                                                                                                                                                                                                                                                                                                                                                                                                                                                                                                                                        | 3. Medizinische Abteilung, Hanusch Krankenhaus                                                                      | Berghthaler laboratory, CeMM Research Center for Molecular Medicine of the Austrian Academy of Sciences | Lukas Endler, Anna Schedl, Thomas Penz, Benedikt Agerer, Maelle Le Moing, Michael Schuster, Bekir Erguner, Jan Laine, Martin Senekowitsch, Christoph Bock, Andreas Berghthaler                                                                                                                                                                                                                                                                   |
| EPI_ISL_1118065, EPI_ISL_1118066, EPI_ISL_1118067, EPI_ISL_1118068, EPI_ISL_1118069, EPI_ISL_1118070, EPI_ISL_1118071                                                                                                                                                                                                                                                                                                                                                                                                                                                                                                                                                                                  | Center for Virology, Medical University of Vienna                                                                   | Berghthaler laboratory, CeMM Research Center for Molecular Medicine of the Austrian Academy of Sciences | Lukas Endler, Anna Schedl, Thomas Penz, Benedikt Agerer, Maelle Le Moing, Michael Schuster, Bekir Erguner, Jan Laine, Martin Senekowitsch, Christoph Bock, Andreas Berghthaler                                                                                                                                                                                                                                                                   |
| EPI_ISL_1118072                                                                                                                                                                                                                                                                                                                                                                                                                                                                                                                                                                                                                                                                                        | Elling group, Institute of Molecular Biotechnology (IMBA)                                                           | Berghthaler laboratory, CeMM Research Center for Molecular Medicine of the Austrian Academy of Sciences | Lukas Endler, Anna Schedl, Thomas Penz, Benedikt Agerer, Maelle Le Moing, Michael Schuster, Bekir Erguner, Jan Laine, Martin Senekowitsch, Christoph Bock, Andreas Berghthaler                                                                                                                                                                                                                                                                   |
| EPI_ISL_1118075, EPI_ISL_1118076                                                                                                                                                                                                                                                                                                                                                                                                                                                                                                                                                                                                                                                                       | Austrian Agency for Health and Food Safety (AGES)                                                                   | Berghthaler laboratory, CeMM Research Center for Molecular Medicine of the Austrian Academy of Sciences | Lukas Endler, Anna Schedl, Thomas Penz, Benedikt Agerer, Maelle Le Moing, Michael Schuster, Bekir Erguner, Jan Laine, Martin Senekowitsch, Christoph Bock, Andreas Berghthaler                                                                                                                                                                                                                                                                   |
| EPI_ISL_1118093, EPI_ISL_1118094, EPI_ISL_1118095, EPI_ISL_1118096, EPI_ISL_1118097, EPI_ISL_1118098, EPI_ISL_1118099, EPI_ISL_1118100, EPI_ISL_1118101, EPI_ISL_1118102, EPI_ISL_1118103, EPI_ISL_1118104, EPI_ISL_1118105, EPI_ISL_1118107, EPI_ISL_1118108, EPI_ISL_1118109, EPI_ISL_1118110, EPI_ISL_1118111, EPI_ISL_1118112, EPI_ISL_1118113, EPI_ISL_1118135, EPI_ISL_1118136, EPI_ISL_1118137, EPI_ISL_1118138, EPI_ISL_1118139, EPI_ISL_1118140, EPI_ISL_1118141, EPI_ISL_1118143, EPI_ISL_1118145, EPI_ISL_1118147, EPI_ISL_1118148, EPI_ISL_1118149, EPI_ISL_1118150, EPI_ISL_1118151, EPI_ISL_1118152, EPI_ISL_1118153, EPI_ISL_1118154, EPI_ISL_1118155, EPI_ISL_1118156, EPI_ISL_1118157 |                                                                                                                     |                                                                                                         |                                                                                                                                                                                                                                                                                                                                                                                                                                                  |
| see above                                                                                                                                                                                                                                                                                                                                                                                                                                                                                                                                                                                                                                                                                              | Dept. of Microbiology and Infection Control, Akershus University Hospital HF                                        | Dept. of Microbiology and Infection Control, Akershus University Hospital HF                            | Hege Vangstein Aamot, Alexander Hesselberg Lovestad                                                                                                                                                                                                                                                                                                                                                                                              |
| EPI_ISL_1118165, EPI_ISL_1118166, EPI_ISL_1118170, EPI_ISL_1118179, EPI_ISL_1118182, EPI_ISL_1118183, EPI_ISL_1118185                                                                                                                                                                                                                                                                                                                                                                                                                                                                                                                                                                                  | LAB ANALISI PO CARDARELLI CAMPOBASSO                                                                                | Istituto Zooprofilattico Sperimentale dell'Abruzzo e Molise "G. Caporale"                               | Scutellà M, Niro G, Felice V. Lorusso A, Marcacci M, Di Domenico M, Ancora M, Curini V, Mangone I, Rinaldi A, Scialabba S, Di Pasquale A, Cammà C, Puglia I, Calistri P, Savini G                                                                                                                                                                                                                                                                |
| EPI_ISL_1118207, EPI_ISL_1118208, EPI_ISL_1118209, EPI_ISL_1118210, EPI_ISL_1118211, EPI_ISL_1118212, EPI_ISL_1118213, EPI_ISL_1118214, EPI_ISL_1118215, EPI_ISL_1118216                                                                                                                                                                                                                                                                                                                                                                                                                                                                                                                               | National Institute of Health Research and Development                                                               | National Institute of Health Research and Development                                                   | Hana Apasari Pawestri, Subangkit, Kartika Dewi Puspa, Arie Ardiansyah Nugraha, Hartanti Dian Ikawati, Krisna Nur Andriana Pangesti, Yuni Rukminiati, Ririn Ramadhany, Agustiningsih, Kindi Adam, Holy Arif Wibowo, Triyani Soekarso, Ni Ketut Susilarini, Nurika Hariastuti, Ulyi Alfi Nikmah, Reni Herman, Nike Susanti, Herna, Tati Febriyanti, Natalie Laurencia Kipuw, Fauzul Muna, Irene Lorinda Indalao, Nelly Puspandari, Vivi Setiawaty. |
| EPI_ISL_1118318, EPI_ISL_1118319                                                                                                                                                                                                                                                                                                                                                                                                                                                                                                                                                                                                                                                                       | Vestfold Hospital, Toensberg Department of Microbiology                                                             | Norwegian Institute of Public Health, Department of Virology                                            | Kathrine Stene-Johansen, Kamilla Heddeland Instefjord, Hilde Elshaug, Garcia Llorente Ignacio, Engebretsen Serina Beate, Pedersen Benedikte Nevjen, Debech Nadia, Atiya R Ali, Marie Paulsen Madsen, Rasmus Riis Kopperud, Hilde Vollan, Karoline Bragstad, Olav Hungnes                                                                                                                                                                         |
| EPI_ISL_1118350                                                                                                                                                                                                                                                                                                                                                                                                                                                                                                                                                                                                                                                                                        | Akershus University Hospital, Department for Microbiology and Infectious Disease Control                            | Norwegian Institute of Public Health, Department of Virology                                            | Kathrine Stene-Johansen, Kamilla Heddeland Instefjord, Hilde Elshaug, Garcia Llorente Ignacio, Engebretsen Serina Beate, Pedersen Benedikte Nevjen, Debech Nadia, Atiya R Ali, Marie Paulsen Madsen, Rasmus Riis Kopperud, Hilde Vollan, Karoline Bragstad, Olav Hungnes                                                                                                                                                                         |
| EPI_ISL_1118351, EPI_ISL_1118352                                                                                                                                                                                                                                                                                                                                                                                                                                                                                                                                                                                                                                                                       | Ostfold Hospital Trust - Kalnes, Centre for Laboratory Medicine, Section for gene technology and infection serology | Norwegian Institute of Public Health, Department of Virology                                            | Kathrine Stene-Johansen, Kamilla Heddeland Instefjord, Hilde Elshaug, Garcia Llorente Ignacio, Engebretsen Serina Beate, Pedersen Benedikte Nevjen, Debech Nadia, Atiya R Ali, Marie Paulsen Madsen, Rasmus Riis Kopperud, Hilde Vollan, Karoline Bragstad, Olav Hungnes                                                                                                                                                                         |
| EPI_ISL_1118353                                                                                                                                                                                                                                                                                                                                                                                                                                                                                                                                                                                                                                                                                        | Furst Medical Laboratory                                                                                            | Norwegian Institute of Public Health, Department of Virology                                            | Kathrine Stene-Johansen, Kamilla Heddeland Instefjord, Hilde Elshaug, Garcia Llorente Ignacio, Engebretsen Serina Beate, Pedersen Benedikte Nevjen, Debech Nadia, Atiya R Ali, Marie Paulsen Madsen, Rasmus Riis Kopperud, Hilde Vollan, Karoline Bragstad, Olav Hungnes                                                                                                                                                                         |
| EPI_ISL_1118354                                                                                                                                                                                                                                                                                                                                                                                                                                                                                                                                                                                                                                                                                        | Department of Medical Microbiology, St. Olavs hospital                                                              | Norwegian Institute of Public Health, Department of Virology                                            | Kathrine Stene-Johansen, Kamilla Heddeland Instefjord, Hilde Elshaug, Garcia Llorente Ignacio, Engebretsen Serina Beate, Pedersen Benedikte Nevjen, Debech Nadia, Atiya R Ali, Marie Paulsen Madsen, Rasmus Riis Kopperud, Hilde Vollan, Karoline Bragstad, Olav Hungnes                                                                                                                                                                         |
| EPI_ISL_1118356, EPI_ISL_1118357, EPI_ISL_1118360                                                                                                                                                                                                                                                                                                                                                                                                                                                                                                                                                                                                                                                      | Ostfold Hospital Trust - Kalnes, Centre for Laboratory Medicine, Section for gene technology and infection serology | Norwegian Institute of Public Health, Department of Virology                                            | Kathrine Stene-Johansen, Kamilla Heddeland Instefjord, Hilde Elshaug, Garcia Llorente Ignacio, Engebretsen Serina Beate, Pedersen Benedikte Nevjen, Debech Nadia, Atiya R Ali, Marie Paulsen Madsen, Rasmus Riis Kopperud, Hilde Vollan, Karoline Bragstad, Olav Hungnes                                                                                                                                                                         |
| EPI_ISL_1118361, EPI_ISL_1118362                                                                                                                                                                                                                                                                                                                                                                                                                                                                                                                                                                                                                                                                       | Furst Medical Laboratory                                                                                            | Norwegian Institute of Public Health, Department of Virology                                            | Kathrine Stene-Johansen, Kamilla Heddeland Instefjord, Hilde Elshaug, Garcia Llorente Ignacio, Engebretsen Serina Beate, Pedersen Benedikte Nevjen, Debech Nadia, Atiya R Ali, Marie Paulsen Madsen, Rasmus Riis Kopperud, Hilde Vollan, Karoline Bragstad, Olav Hungnes                                                                                                                                                                         |
| EPI_ISL_1118363, EPI_ISL_1118364, EPI_ISL_1118365, EPI_ISL_1118366                                                                                                                                                                                                                                                                                                                                                                                                                                                                                                                                                                                                                                     | Ostfold Hospital Trust - Kalnes, Centre for Laboratory Medicine, Section for gene technology and infection serology | Norwegian Institute of Public Health, Department of Virology                                            | Kathrine Stene-Johansen, Kamilla Heddeland Instefjord, Hilde Elshaug, Garcia Llorente Ignacio, Engebretsen Serina Beate, Pedersen Benedikte Nevjen, Debech Nadia, Atiya R Ali, Marie Paulsen Madsen, Rasmus Riis Kopperud, Hilde Vollan, Karoline Bragstad, Olav Hungnes                                                                                                                                                                         |
| EPI_ISL_1118368, EPI_ISL_1118369                                                                                                                                                                                                                                                                                                                                                                                                                                                                                                                                                                                                                                                                       | Medical Microbiology Unit, Department for Laboratory Medicine, Drammen Hospital, Vestre Viken Health Trust,         | Norwegian Institute of Public Health, Department of Virology                                            | Kathrine Stene-Johansen, Kamilla Heddeland Instefjord, Hilde Elshaug, Garcia Llorente Ignacio, Engebretsen Serina Beate, Pedersen Benedikte Nevjen, Debech Nadia, Atiya R Ali, Marie Paulsen Madsen, Rasmus Riis Kopperud, Hilde Vollan, Karoline Bragstad, Olav Hungnes                                                                                                                                                                         |



|                                                                                                                                                                                                                                                                                                                                                                                                                                                                                                                                                                                                                                                                                                                                                                                                                                                                                                                    |                                                                                                                     |                                                                                          |                                                                                                                                                                                                                                                                                                                                                                                                                                              |
|--------------------------------------------------------------------------------------------------------------------------------------------------------------------------------------------------------------------------------------------------------------------------------------------------------------------------------------------------------------------------------------------------------------------------------------------------------------------------------------------------------------------------------------------------------------------------------------------------------------------------------------------------------------------------------------------------------------------------------------------------------------------------------------------------------------------------------------------------------------------------------------------------------------------|---------------------------------------------------------------------------------------------------------------------|------------------------------------------------------------------------------------------|----------------------------------------------------------------------------------------------------------------------------------------------------------------------------------------------------------------------------------------------------------------------------------------------------------------------------------------------------------------------------------------------------------------------------------------------|
| EPI_ISL_1118619                                                                                                                                                                                                                                                                                                                                                                                                                                                                                                                                                                                                                                                                                                                                                                                                                                                                                                    | Nordland Hospital - Bodo, Laboratory Department, Molecular Biology Unit                                             | Norwegian Institute of Public Health, Department of Virology                             | Kathrine Stene-Johansen, Kamilla Heddeland Instefjord, Hilde Elshaug, Garcia Llorente Ignacio, Engebretsen Serina Beate, Pedersen Benedikte Nevjen, Debech Nadia, Atiya R Ali, Marie Paulsen Madsen, Rasmus Riis Kopperud, Hilde Vollan, Karoline Bragstad, Olav Hungnes                                                                                                                                                                     |
| EPI_ISL_1118622                                                                                                                                                                                                                                                                                                                                                                                                                                                                                                                                                                                                                                                                                                                                                                                                                                                                                                    | Ostfold Hospital Trust - Kalnes, Centre for Laboratory Medicine, Section for gene technology and infection serology | Norwegian Institute of Public Health, Department of Virology                             | Kathrine Stene-Johansen, Kamilla Heddeland Instefjord, Hilde Elshaug, Garcia Llorente Ignacio, Engebretsen Serina Beate, Pedersen Benedikte Nevjen, Debech Nadia, Atiya R Ali, Marie Paulsen Madsen, Rasmus Riis Kopperud, Hilde Vollan, Karoline Bragstad, Olav Hungnes                                                                                                                                                                     |
| EPI_ISL_1118625, EPI_ISL_1118627                                                                                                                                                                                                                                                                                                                                                                                                                                                                                                                                                                                                                                                                                                                                                                                                                                                                                   | Norwegian Institute of Public Health, Department of Virology                                                        | Norwegian Institute of Public Health, Department of Virology                             | Kathrine Stene-Johansen, Kamilla Heddeland Instefjord, Hilde Elshaug, Garcia Llorente Ignacio, Engebretsen Serina Beate, Pedersen Benedikte Nevjen, Debech Nadia, Atiya R Ali, Marie Paulsen Madsen, Rasmus Riis Kopperud, Hilde Vollan, Karoline Bragstad, Olav Hungnes                                                                                                                                                                     |
| EPI_ISL_1118631, EPI_ISL_1118632                                                                                                                                                                                                                                                                                                                                                                                                                                                                                                                                                                                                                                                                                                                                                                                                                                                                                   | Vestfold Hospital, Toensberg Department of Microbiology                                                             | Norwegian Institute of Public Health, Department of Virology                             | Kathrine Stene-Johansen, Kamilla Heddeland Instefjord, Hilde Elshaug, Garcia Llorente Ignacio, Engebretsen Serina Beate, Pedersen Benedikte Nevjen, Debech Nadia, Atiya R Ali, Marie Paulsen Madsen, Rasmus Riis Kopperud, Hilde Vollan, Karoline Bragstad, Olav Hungnes                                                                                                                                                                     |
| EPI_ISL_1118633, EPI_ISL_1118634, EPI_ISL_1118635                                                                                                                                                                                                                                                                                                                                                                                                                                                                                                                                                                                                                                                                                                                                                                                                                                                                  | Furst Medical Laboratory                                                                                            | Norwegian Institute of Public Health, Department of Virology                             | Kathrine Stene-Johansen, Kamilla Heddeland Instefjord, Hilde Elshaug, Garcia Llorente Ignacio, Engebretsen Serina Beate, Pedersen Benedikte Nevjen, Debech Nadia, Atiya R Ali, Marie Paulsen Madsen, Rasmus Riis Kopperud, Hilde Vollan, Karoline Bragstad, Olav Hungnes                                                                                                                                                                     |
| EPI_ISL_1118636                                                                                                                                                                                                                                                                                                                                                                                                                                                                                                                                                                                                                                                                                                                                                                                                                                                                                                    | Nordland Hospital - Bodo, Laboratory Department, Molecular Biology Unit                                             | Norwegian Institute of Public Health, Department of Virology                             | Kathrine Stene-Johansen, Kamilla Heddeland Instefjord, Hilde Elshaug, Garcia Llorente Ignacio, Engebretsen Serina Beate, Pedersen Benedikte Nevjen, Debech Nadia, Atiya R Ali, Marie Paulsen Madsen, Rasmus Riis Kopperud, Hilde Vollan, Karoline Bragstad, Olav Hungnes                                                                                                                                                                     |
| EPI_ISL_1118637, EPI_ISL_1118638, EPI_ISL_1118641                                                                                                                                                                                                                                                                                                                                                                                                                                                                                                                                                                                                                                                                                                                                                                                                                                                                  | Furst Medical Laboratory                                                                                            | Norwegian Institute of Public Health, Department of Virology                             | Kathrine Stene-Johansen, Kamilla Heddeland Instefjord, Hilde Elshaug, Garcia Llorente Ignacio, Engebretsen Serina Beate, Pedersen Benedikte Nevjen, Debech Nadia, Atiya R Ali, Marie Paulsen Madsen, Rasmus Riis Kopperud, Hilde Vollan, Karoline Bragstad, Olav Hungnes                                                                                                                                                                     |
| EPI_ISL_1118645                                                                                                                                                                                                                                                                                                                                                                                                                                                                                                                                                                                                                                                                                                                                                                                                                                                                                                    | Akershus University Hospital, Department for Microbiology and Infectious Disease Control                            | Norwegian Institute of Public Health, Department of Virology                             | Kathrine Stene-Johansen, Kamilla Heddeland Instefjord, Hilde Elshaug, Garcia Llorente Ignacio, Engebretsen Serina Beate, Pedersen Benedikte Nevjen, Debech Nadia, Atiya R Ali, Marie Paulsen Madsen, Rasmus Riis Kopperud, Hilde Vollan, Karoline Bragstad, Olav Hungnes                                                                                                                                                                     |
| EPI_ISL_1118646                                                                                                                                                                                                                                                                                                                                                                                                                                                                                                                                                                                                                                                                                                                                                                                                                                                                                                    | Furst Medical Laboratory                                                                                            | Norwegian Institute of Public Health, Department of Virology                             | Kathrine Stene-Johansen, Kamilla Heddeland Instefjord, Hilde Elshaug, Garcia Llorente Ignacio, Engebretsen Serina Beate, Pedersen Benedikte Nevjen, Debech Nadia, Atiya R Ali, Marie Paulsen Madsen, Rasmus Riis Kopperud, Hilde Vollan, Karoline Bragstad, Olav Hungnes                                                                                                                                                                     |
| EPI_ISL_1118647                                                                                                                                                                                                                                                                                                                                                                                                                                                                                                                                                                                                                                                                                                                                                                                                                                                                                                    | Vestfold Hospital, Toensberg Department of Microbiology                                                             | Norwegian Institute of Public Health, Department of Virology                             | Kathrine Stene-Johansen, Kamilla Heddeland Instefjord, Hilde Elshaug, Garcia Llorente Ignacio, Engebretsen Serina Beate, Pedersen Benedikte Nevjen, Debech Nadia, Atiya R Ali, Marie Paulsen Madsen, Rasmus Riis Kopperud, Hilde Vollan, Karoline Bragstad, Olav Hungnes                                                                                                                                                                     |
| EPI_ISL_1118648                                                                                                                                                                                                                                                                                                                                                                                                                                                                                                                                                                                                                                                                                                                                                                                                                                                                                                    | Akershus University Hospital, Department for Microbiology and Infectious Disease Control                            | Norwegian Institute of Public Health, Department of Virology                             | Kathrine Stene-Johansen, Kamilla Heddeland Instefjord, Hilde Elshaug, Garcia Llorente Ignacio, Engebretsen Serina Beate, Pedersen Benedikte Nevjen, Debech Nadia, Atiya R Ali, Marie Paulsen Madsen, Rasmus Riis Kopperud, Hilde Vollan, Karoline Bragstad, Olav Hungnes                                                                                                                                                                     |
| EPI_ISL_1118649                                                                                                                                                                                                                                                                                                                                                                                                                                                                                                                                                                                                                                                                                                                                                                                                                                                                                                    | Foerde Hospital, Department of Microbiology                                                                         | Norwegian Institute of Public Health, Department of Virology                             | Kathrine Stene-Johansen, Kamilla Heddeland Instefjord, Hilde Elshaug, Garcia Llorente Ignacio, Engebretsen Serina Beate, Pedersen Benedikte Nevjen, Debech Nadia, Atiya R Ali, Marie Paulsen Madsen, Rasmus Riis Kopperud, Hilde Vollan, Karoline Bragstad, Olav Hungnes                                                                                                                                                                     |
| EPI_ISL_1118650                                                                                                                                                                                                                                                                                                                                                                                                                                                                                                                                                                                                                                                                                                                                                                                                                                                                                                    | Furst Medical Laboratory                                                                                            | Norwegian Institute of Public Health, Department of Virology                             | Kathrine Stene-Johansen, Kamilla Heddeland Instefjord, Hilde Elshaug, Garcia Llorente Ignacio, Engebretsen Serina Beate, Pedersen Benedikte Nevjen, Debech Nadia, Atiya R Ali, Marie Paulsen Madsen, Rasmus Riis Kopperud, Hilde Vollan, Karoline Bragstad, Olav Hungnes                                                                                                                                                                     |
| EPI_ISL_1118651, EPI_ISL_1118652, EPI_ISL_1118653, EPI_ISL_1118654, EPI_ISL_1118655                                                                                                                                                                                                                                                                                                                                                                                                                                                                                                                                                                                                                                                                                                                                                                                                                                | Medical Microbiology Unit, Department for Laboratory Medicine, Drammen Hospital, Vestre Viken Health Trust,         | Norwegian Institute of Public Health, Department of Virology                             | Kathrine Stene-Johansen, Kamilla Heddeland Instefjord, Hilde Elshaug, Garcia Llorente Ignacio, Engebretsen Serina Beate, Pedersen Benedikte Nevjen, Debech Nadia, Atiya R Ali, Marie Paulsen Madsen, Rasmus Riis Kopperud, Hilde Vollan, Karoline Bragstad, Olav Hungnes                                                                                                                                                                     |
| EPI_ISL_1118657                                                                                                                                                                                                                                                                                                                                                                                                                                                                                                                                                                                                                                                                                                                                                                                                                                                                                                    | Innlandet Hospital Trust, Division Lillehammer, Department for Medical Microbiology                                 | Norwegian Institute of Public Health, Department of Virology                             | Kathrine Stene-Johansen, Kamilla Heddeland Instefjord, Hilde Elshaug, Garcia Llorente Ignacio, Engebretsen Serina Beate, Pedersen Benedikte Nevjen, Debech Nadia, Atiya R Ali, Marie Paulsen Madsen, Rasmus Riis Kopperud, Hilde Vollan, Karoline Bragstad, Olav Hungnes                                                                                                                                                                     |
| EPI_ISL_1118658                                                                                                                                                                                                                                                                                                                                                                                                                                                                                                                                                                                                                                                                                                                                                                                                                                                                                                    | Norwegian Institute of Public Health, Department of Virology                                                        | Norwegian Institute of Public Health, Department of Virology                             | Kathrine Stene-Johansen, Kamilla Heddeland Instefjord, Hilde Elshaug, Garcia Llorente Ignacio, Engebretsen Serina Beate, Pedersen Benedikte Nevjen, Debech Nadia, Atiya R Ali, Marie Paulsen Madsen, Rasmus Riis Kopperud, Hilde Vollan, Karoline Bragstad, Olav Hungnes                                                                                                                                                                     |
| EPI_ISL_1118659                                                                                                                                                                                                                                                                                                                                                                                                                                                                                                                                                                                                                                                                                                                                                                                                                                                                                                    | Furst Medical Laboratory                                                                                            | Norwegian Institute of Public Health, Department of Virology                             | Kathrine Stene-Johansen, Kamilla Heddeland Instefjord, Hilde Elshaug, Garcia Llorente Ignacio, Engebretsen Serina Beate, Pedersen Benedikte Nevjen, Debech Nadia, Atiya R Ali, Marie Paulsen Madsen, Rasmus Riis Kopperud, Hilde Vollan, Karoline Bragstad, Olav Hungnes                                                                                                                                                                     |
| EPI_ISL_1118660                                                                                                                                                                                                                                                                                                                                                                                                                                                                                                                                                                                                                                                                                                                                                                                                                                                                                                    | Akershus University Hospital, Department for Microbiology and Infectious Disease Control                            | Norwegian Institute of Public Health, Department of Virology                             | Kathrine Stene-Johansen, Kamilla Heddeland Instefjord, Hilde Elshaug, Garcia Llorente Ignacio, Engebretsen Serina Beate, Pedersen Benedikte Nevjen, Debech Nadia, Atiya R Ali, Marie Paulsen Madsen, Rasmus Riis Kopperud, Hilde Vollan, Karoline Bragstad, Olav Hungnes                                                                                                                                                                     |
| EPI_ISL_1118666                                                                                                                                                                                                                                                                                                                                                                                                                                                                                                                                                                                                                                                                                                                                                                                                                                                                                                    | Furst Medical Laboratory                                                                                            | Norwegian Institute of Public Health, Department of Virology                             | Kathrine Stene-Johansen, Kamilla Heddeland Instefjord, Hilde Elshaug, Garcia Llorente Ignacio, Engebretsen Serina Beate, Pedersen Benedikte Nevjen, Debech Nadia, Atiya R Ali, Marie Paulsen Madsen, Rasmus Riis Kopperud, Hilde Vollan, Karoline Bragstad, Olav Hungnes                                                                                                                                                                     |
| EPI_ISL_1118667, EPI_ISL_1118674, EPI_ISL_1118676, EPI_ISL_1118679                                                                                                                                                                                                                                                                                                                                                                                                                                                                                                                                                                                                                                                                                                                                                                                                                                                 | Akershus University Hospital, Department for Microbiology and Infectious Disease Control                            | Norwegian Institute of Public Health, Department of Virology                             | Kathrine Stene-Johansen, Kamilla Heddeland Instefjord, Hilde Elshaug, Garcia Llorente Ignacio, Engebretsen Serina Beate, Pedersen Benedikte Nevjen, Debech Nadia, Atiya R Ali, Marie Paulsen Madsen, Rasmus Riis Kopperud, Hilde Vollan, Karoline Bragstad, Olav Hungnes                                                                                                                                                                     |
| EPI_ISL_1118682, EPI_ISL_1118686, EPI_ISL_1118687                                                                                                                                                                                                                                                                                                                                                                                                                                                                                                                                                                                                                                                                                                                                                                                                                                                                  | Furst Medical Laboratory                                                                                            | Norwegian Institute of Public Health, Department of Virology                             | Kathrine Stene-Johansen, Kamilla Heddeland Instefjord, Hilde Elshaug, Garcia Llorente Ignacio, Engebretsen Serina Beate, Pedersen Benedikte Nevjen, Debech Nadia, Atiya R Ali, Marie Paulsen Madsen, Rasmus Riis Kopperud, Hilde Vollan, Karoline Bragstad, Olav Hungnes                                                                                                                                                                     |
| EPI_ISL_1118689                                                                                                                                                                                                                                                                                                                                                                                                                                                                                                                                                                                                                                                                                                                                                                                                                                                                                                    | Akershus University Hospital, Department for Microbiology and Infectious Disease Control                            | Norwegian Institute of Public Health, Department of Virology                             | Kathrine Stene-Johansen, Kamilla Heddeland Instefjord, Hilde Elshaug, Garcia Llorente Ignacio, Engebretsen Serina Beate, Pedersen Benedikte Nevjen, Debech Nadia, Atiya R Ali, Marie Paulsen Madsen, Rasmus Riis Kopperud, Hilde Vollan, Karoline Bragstad, Olav Hungnes                                                                                                                                                                     |
| EPI_ISL_1118830, EPI_ISL_1118831, EPI_ISL_1118832, EPI_ISL_1118833, EPI_ISL_1118834, EPI_ISL_1118835, EPI_ISL_1118844, EPI_ISL_1118845, EPI_ISL_1118846, EPI_ISL_1118847                                                                                                                                                                                                                                                                                                                                                                                                                                                                                                                                                                                                                                                                                                                                           | Lab voor klinische biologie                                                                                         | Lab voor klinische biologie                                                              | Marija Janevska, Hannelore Hamerlinck, Bruno Verhasselt                                                                                                                                                                                                                                                                                                                                                                                      |
| EPI_ISL_1118877                                                                                                                                                                                                                                                                                                                                                                                                                                                                                                                                                                                                                                                                                                                                                                                                                                                                                                    | Hopital                                                                                                             | National Reference Center for Viruses of Respiratory Infections, Institut Pasteur, Paris | Marion Barbet, Sylvie Behillil, Méline Bizard, Angela Brisebarre, Camille Capel, Etienne Simon-Lorière, Vincent Enouf, Maud Vanpeene, Sylvie van der Werf, Gastli Nabil                                                                                                                                                                                                                                                                      |
| EPI_ISL_1118878                                                                                                                                                                                                                                                                                                                                                                                                                                                                                                                                                                                                                                                                                                                                                                                                                                                                                                    | Hopital                                                                                                             | National Reference Center for Viruses of Respiratory Infections, Institut Pasteur, Paris | Marion Barbet, Sylvie Behillil, Méline Bizard, Angela Brisebarre, Camille Capel, Etienne Simon-Lorière, Vincent Enouf, Maud Vanpeene, Sylvie van der Werf, Ledru Sylvie                                                                                                                                                                                                                                                                      |
| EPI_ISL_1118883                                                                                                                                                                                                                                                                                                                                                                                                                                                                                                                                                                                                                                                                                                                                                                                                                                                                                                    | Hopital                                                                                                             | National Reference Center for Viruses of Respiratory Infections, Institut Pasteur, Paris | Marion Barbet, Sylvie Behillil, Méline Bizard, Angela Brisebarre, Camille Capel, Etienne Simon-Lorière, Vincent Enouf, Maud Vanpeene, Sylvie van der Werf, Luizy Nelly                                                                                                                                                                                                                                                                       |
| EPI_ISL_1118930                                                                                                                                                                                                                                                                                                                                                                                                                                                                                                                                                                                                                                                                                                                                                                                                                                                                                                    | Laboratorio Microbiologia e Virologia P.O. Cotugno A.O. dei Colli                                                   | Laboratorio Microbiologia e Virologia P.O. Cotugno A.O. dei Colli                        | Luigi Atripaldi, Claudia Tiberio, Anna Perfetti, Pellegrino Cerino, Biancamaria Pierri, Maria Concetta Cuomo                                                                                                                                                                                                                                                                                                                                 |
| EPI_ISL_1118931                                                                                                                                                                                                                                                                                                                                                                                                                                                                                                                                                                                                                                                                                                                                                                                                                                                                                                    | National Institute of Health Research and Development                                                               | National Institute of Health Research and Development                                    | Hana Apsari Pawestri, Subangkit, Kartika Dewi Puspa, Arie Ardiansyah Nugraha, Hartanti Dian Ikawati, Krisna Nur Andriana Pangesti, Yuni Rukminiati, Ririn Ramadhany, Agustinsih, Kindi Adam, Holy Arif Wibowo, Triyani Soekarro, Ni Ketut Susilarini, Nurika Hariastuti, Uily Alfi Nikmah, Reni Herman, Nike Susanti, Herna, Tati Febriyanti, Natalie Laurencia Kipuw, Fauzul Muna, Irene Lorinda Indalao, Nelly Puspandari, Vivi Setiawaty. |
| EPI_ISL_1118932                                                                                                                                                                                                                                                                                                                                                                                                                                                                                                                                                                                                                                                                                                                                                                                                                                                                                                    | Laboratorio Microbiologia e Virologia P.O. Cotugno A.O. dei Colli                                                   | Laboratorio Microbiologia e Virologia P.O. Cotugno A.O. dei Colli                        | Luigi Atripaldi, Claudia Tiberio, Anna Perfetti, Pellegrino Cerino, Biancamaria Pierri, Maria Concetta Cuomo                                                                                                                                                                                                                                                                                                                                 |
| EPI_ISL_1118933                                                                                                                                                                                                                                                                                                                                                                                                                                                                                                                                                                                                                                                                                                                                                                                                                                                                                                    | National Institute of Health Research and Development                                                               | National Institute of Health Research and Development                                    | Hana Apsari Pawestri, Subangkit, Kartika Dewi Puspa, Arie Ardiansyah Nugraha, Hartanti Dian Ikawati, Krisna Nur Andriana Pangesti, Yuni Rukminiati, Ririn Ramadhany, Agustinsih, Kindi Adam, Holy Arif Wibowo, Triyani Soekarro, Ni Ketut Susilarini, Nurika Hariastuti, Uily Alfi Nikmah, Reni Herman, Nike Susanti, Herna, Tati Febriyanti, Natalie Laurencia Kipuw, Fauzul Muna, Irene Lorinda Indalao, Nelly Puspandari, Vivi Setiawaty. |
| EPI_ISL_1118934                                                                                                                                                                                                                                                                                                                                                                                                                                                                                                                                                                                                                                                                                                                                                                                                                                                                                                    | Laboratorio Microbiologia e Virologia P.O. Cotugno A.O. dei Colli                                                   | Laboratorio Microbiologia e Virologia P.O. Cotugno A.O. dei Colli                        | Luigi Atripaldi, Claudia Tiberio, Anna Perfetti, Pellegrino Cerino, Biancamaria Pierri, Maria Concetta Cuomo                                                                                                                                                                                                                                                                                                                                 |
| EPI_ISL_1119035, EPI_ISL_1119040, EPI_ISL_1119051, EPI_ISL_1119052, EPI_ISL_1119053, EPI_ISL_1119054, EPI_ISL_1119055, EPI_ISL_1119056, EPI_ISL_1119057, EPI_ISL_1119058, EPI_ISL_1119059, EPI_ISL_1119060, EPI_ISL_1119061, EPI_ISL_1119062, EPI_ISL_1119063, EPI_ISL_1119064, EPI_ISL_1119065, EPI_ISL_1119066, EPI_ISL_1119069, EPI_ISL_1119070, EPI_ISL_1119071, EPI_ISL_1119073, EPI_ISL_1119074, EPI_ISL_1119075, EPI_ISL_1119076, EPI_ISL_1119077, EPI_ISL_1119078, EPI_ISL_1119081, EPI_ISL_1119082, EPI_ISL_1119083, EPI_ISL_1119084, EPI_ISL_1119085, EPI_ISL_1119088, EPI_ISL_1119089, EPI_ISL_1119090, EPI_ISL_1119091, EPI_ISL_1119092, EPI_ISL_1119093, EPI_ISL_1119094, EPI_ISL_1119095, EPI_ISL_1119096, EPI_ISL_1119097, EPI_ISL_1119098, EPI_ISL_1119099, EPI_ISL_1119101, EPI_ISL_1119102, EPI_ISL_1119103, EPI_ISL_1119104, EPI_ISL_1119105, EPI_ISL_1119106, EPI_ISL_1119107, EPI_ISL_1119108 |                                                                                                                     |                                                                                          |                                                                                                                                                                                                                                                                                                                                                                                                                                              |



[illegible]

[illegible]

|                                                                                                                                                                                                                                                                                |                                                                                |                                                                                |                                                                                                                                                                                                                                                                                                                                                                        |
|--------------------------------------------------------------------------------------------------------------------------------------------------------------------------------------------------------------------------------------------------------------------------------|--------------------------------------------------------------------------------|--------------------------------------------------------------------------------|------------------------------------------------------------------------------------------------------------------------------------------------------------------------------------------------------------------------------------------------------------------------------------------------------------------------------------------------------------------------|
| EPI_ISL_1120070, EPI_ISL_1120071, EPI_ISL_1120072                                                                                                                                                                                                                              |                                                                                | Zürich                                                                         | Feldkamp, Ina Nissen, Natascha Santacroce, Elodie Burcklen, Christiane Beckmann, Maurice Redondo, Olivier Kobel, Christoph Noppen, Sophie Seidel, Noemie Santamaria de Souza, Niko Beerenwinkel, Tanja Stadler                                                                                                                                                         |
| EPI_ISL_1120073                                                                                                                                                                                                                                                                | Viollier AG                                                                    | Department of Biosystems Science and Engineering, ETH Zürich                   | Chaoran Chen, Sarah Nadeau, Ivan Topolsky, Emmanouil Dermitzakis, Keith Harshman, Ioannis Xenarios, Henri Pegeot, Lorenzo Cerutti, Deborah Penet, Philipp Jablonski, Lara Fuhrmann, David Dreifuss, Katharina Jahn, Christiane Beckmann, Maurice Redondo, Olivier Kobel, Christoph Noppen, Sophie Seidel, Noemie Santamaria de Souza, Niko Beerenwinkel, Tanja Stadler |
| EPI_ISL_1120075, EPI_ISL_1120077, EPI_ISL_1120078, EPI_ISL_1120079, EPI_ISL_1120080, EPI_ISL_1120081                                                                                                                                                                           | Viollier AG                                                                    | Department of Biosystems Science and Engineering, ETH Zürich                   | Christian Beisel, Sarah Nadeau, Chaoran Chen, Ivan Topolsky, Philipp Jablonski, Lara Fuhrmann, David Dreifuss, Katharina Jahn, Rebecca Denes, Mirjam Feldkamp, Ina Nissen, Natascha Santacroce, Elodie Burcklen, Christiane Beckmann, Maurice Redondo, Olivier Kobel, Christoph Noppen, Sophie Seidel, Noemie Santamaria de Souza, Niko Beerenwinkel, Tanja Stadler    |
| EPI_ISL_1120083                                                                                                                                                                                                                                                                | Viollier AG                                                                    | Department of Biosystems Science and Engineering, ETH Zürich                   | Chaoran Chen, Sarah Nadeau, Ivan Topolsky, Emmanouil Dermitzakis, Keith Harshman, Ioannis Xenarios, Henri Pegeot, Lorenzo Cerutti, Deborah Penet, Philipp Jablonski, Lara Fuhrmann, David Dreifuss, Katharina Jahn, Christiane Beckmann, Maurice Redondo, Olivier Kobel, Christoph Noppen, Sophie Seidel, Noemie Santamaria de Souza, Niko Beerenwinkel, Tanja Stadler |
| EPI_ISL_1120084, EPI_ISL_1120085                                                                                                                                                                                                                                               | Viollier AG                                                                    | Department of Biosystems Science and Engineering, ETH Zürich                   | Christian Beisel, Sarah Nadeau, Chaoran Chen, Ivan Topolsky, Philipp Jablonski, Lara Fuhrmann, David Dreifuss, Katharina Jahn, Rebecca Denes, Mirjam Feldkamp, Ina Nissen, Natascha Santacroce, Elodie Burcklen, Christiane Beckmann, Maurice Redondo, Olivier Kobel, Christoph Noppen, Sophie Seidel, Noemie Santamaria de Souza, Niko Beerenwinkel, Tanja Stadler    |
| EPI_ISL_1120086                                                                                                                                                                                                                                                                | Viollier AG                                                                    | Department of Biosystems Science and Engineering, ETH Zürich                   | Chaoran Chen, Sarah Nadeau, Ivan Topolsky, Emmanouil Dermitzakis, Keith Harshman, Ioannis Xenarios, Henri Pegeot, Lorenzo Cerutti, Deborah Penet, Philipp Jablonski, Lara Fuhrmann, David Dreifuss, Katharina Jahn, Christiane Beckmann, Maurice Redondo, Olivier Kobel, Christoph Noppen, Sophie Seidel, Noemie Santamaria de Souza, Niko Beerenwinkel, Tanja Stadler |
| EPI_ISL_1120087                                                                                                                                                                                                                                                                | Viollier AG                                                                    | Department of Biosystems Science and Engineering, ETH Zürich                   | Christian Beisel, Sarah Nadeau, Chaoran Chen, Ivan Topolsky, Philipp Jablonski, Lara Fuhrmann, David Dreifuss, Katharina Jahn, Rebecca Denes, Mirjam Feldkamp, Ina Nissen, Natascha Santacroce, Elodie Burcklen, Christiane Beckmann, Maurice Redondo, Olivier Kobel, Christoph Noppen, Sophie Seidel, Noemie Santamaria de Souza, Niko Beerenwinkel, Tanja Stadler    |
| EPI_ISL_1120088                                                                                                                                                                                                                                                                | Viollier AG                                                                    | Department of Biosystems Science and Engineering, ETH Zürich                   | Chaoran Chen, Sarah Nadeau, Ivan Topolsky, Emmanouil Dermitzakis, Keith Harshman, Ioannis Xenarios, Henri Pegeot, Lorenzo Cerutti, Deborah Penet, Philipp Jablonski, Lara Fuhrmann, David Dreifuss, Katharina Jahn, Christiane Beckmann, Maurice Redondo, Olivier Kobel, Christoph Noppen, Sophie Seidel, Noemie Santamaria de Souza, Niko Beerenwinkel, Tanja Stadler |
| EPI_ISL_1120089, EPI_ISL_1120090, EPI_ISL_1120091, EPI_ISL_1120092                                                                                                                                                                                                             | Viollier AG                                                                    | Department of Biosystems Science and Engineering, ETH Zürich                   | Christian Beisel, Sarah Nadeau, Chaoran Chen, Ivan Topolsky, Philipp Jablonski, Lara Fuhrmann, David Dreifuss, Katharina Jahn, Rebecca Denes, Mirjam Feldkamp, Ina Nissen, Natascha Santacroce, Elodie Burcklen, Christiane Beckmann, Maurice Redondo, Olivier Kobel, Christoph Noppen, Sophie Seidel, Noemie Santamaria de Souza, Niko Beerenwinkel, Tanja Stadler    |
| EPI_ISL_1120093, EPI_ISL_1120094, EPI_ISL_1120095                                                                                                                                                                                                                              | Viollier AG                                                                    | Department of Biosystems Science and Engineering, ETH Zürich                   | Chaoran Chen, Sarah Nadeau, Ivan Topolsky, Emmanouil Dermitzakis, Keith Harshman, Ioannis Xenarios, Henri Pegeot, Lorenzo Cerutti, Deborah Penet, Philipp Jablonski, Lara Fuhrmann, David Dreifuss, Katharina Jahn, Christiane Beckmann, Maurice Redondo, Olivier Kobel, Christoph Noppen, Sophie Seidel, Noemie Santamaria de Souza, Niko Beerenwinkel, Tanja Stadler |
| EPI_ISL_1120096, EPI_ISL_1120097, EPI_ISL_1120098, EPI_ISL_1120099, EPI_ISL_1120100                                                                                                                                                                                            | Viollier AG                                                                    | Department of Biosystems Science and Engineering, ETH Zürich                   | Christian Beisel, Sarah Nadeau, Chaoran Chen, Ivan Topolsky, Philipp Jablonski, Lara Fuhrmann, David Dreifuss, Katharina Jahn, Rebecca Denes, Mirjam Feldkamp, Ina Nissen, Natascha Santacroce, Elodie Burcklen, Christiane Beckmann, Maurice Redondo, Olivier Kobel, Christoph Noppen, Sophie Seidel, Noemie Santamaria de Souza, Niko Beerenwinkel, Tanja Stadler    |
| EPI_ISL_1120101, EPI_ISL_1120102                                                                                                                                                                                                                                               | Viollier AG                                                                    | Department of Biosystems Science and Engineering, ETH Zürich                   | Chaoran Chen, Sarah Nadeau, Ivan Topolsky, Emmanouil Dermitzakis, Keith Harshman, Ioannis Xenarios, Henri Pegeot, Lorenzo Cerutti, Deborah Penet, Philipp Jablonski, Lara Fuhrmann, David Dreifuss, Katharina Jahn, Christiane Beckmann, Maurice Redondo, Olivier Kobel, Christoph Noppen, Sophie Seidel, Noemie Santamaria de Souza, Niko Beerenwinkel, Tanja Stadler |
| EPI_ISL_1120103                                                                                                                                                                                                                                                                | Viollier AG                                                                    | Department of Biosystems Science and Engineering, ETH Zürich                   | Christian Beisel, Sarah Nadeau, Chaoran Chen, Ivan Topolsky, Philipp Jablonski, Lara Fuhrmann, David Dreifuss, Katharina Jahn, Rebecca Denes, Mirjam Feldkamp, Ina Nissen, Natascha Santacroce, Elodie Burcklen, Christiane Beckmann, Maurice Redondo, Olivier Kobel, Christoph Noppen, Sophie Seidel, Noemie Santamaria de Souza, Niko Beerenwinkel, Tanja Stadler    |
| EPI_ISL_1120104, EPI_ISL_1120105, EPI_ISL_1120106, EPI_ISL_1120107                                                                                                                                                                                                             | Viollier AG                                                                    | Department of Biosystems Science and Engineering, ETH Zürich                   | Chaoran Chen, Sarah Nadeau, Ivan Topolsky, Emmanouil Dermitzakis, Keith Harshman, Ioannis Xenarios, Henri Pegeot, Lorenzo Cerutti, Deborah Penet, Philipp Jablonski, Lara Fuhrmann, David Dreifuss, Katharina Jahn, Christiane Beckmann, Maurice Redondo, Olivier Kobel, Christoph Noppen, Sophie Seidel, Noemie Santamaria de Souza, Niko Beerenwinkel, Tanja Stadler |
| EPI_ISL_1120120                                                                                                                                                                                                                                                                | Area Biologia Molecolare - Istituto Zooprofilattico Sperimentale della Sicilia | Area Biologia Molecolare - Istituto Zooprofilattico Sperimentale della Sicilia | REALE Stefano, SCIBETTA Silvia, PIAZZA Angela, BRUNO Gabriella, CASTELLI Germano, BRUNO Federica, VITALE Francesco, TRAMUTO Fabio, MAIDA Carmelo Massimo, MAZZUCCO Walter, DI NARO Daniela, RANDAZZO Giulia, VITALE Fabrizio                                                                                                                                           |
| EPI_ISL_1120734, EPI_ISL_1120735, EPI_ISL_1120736, EPI_ISL_1120737                                                                                                                                                                                                             | Platform BIS UZA/UAntwerpen                                                    | UAntwerp, Laboratory of Medical Microbiology                                   | Basil Britto Xavier, Jasmine Coppens, Marie Le Mercier, Christine Lammens, Veerle Matheeuessen, Herman Goossens                                                                                                                                                                                                                                                        |
| EPI_ISL_1120878, EPI_ISL_1120879, EPI_ISL_1120880, EPI_ISL_1120881, EPI_ISL_1120882, EPI_ISL_1120884, EPI_ISL_1120885, EPI_ISL_1120886, EPI_ISL_1120887, EPI_ISL_1120888, EPI_ISL_1120889, EPI_ISL_1120891, EPI_ISL_1120893, EPI_ISL_1120894, EPI_ISL_1120895, EPI_ISL_1120896 | Instituto Nacional de Medicina Genomica                                        | Instituto Nacional de Medicina Genomica                                        | Hidalgo-Miranda A, Mendoza-Vargas A, Reyes-Grajeda JP, Cedro-Tanda A, Alcaraz N, Gonzalez-Barrera D, Rangel-DeLeon D, Ramirez-Vega O, Sifuentes-Rojas C, Cisneros-Villanueva M, Herrera-Montalvo LA                                                                                                                                                                    |
| see above                                                                                                                                                                                                                                                                      |                                                                                |                                                                                |                                                                                                                                                                                                                                                                                                                                                                        |
| EPI_ISL_1121033                                                                                                                                                                                                                                                                | USCA CASTEL DI SANGRO                                                          | Istituto Zooprofilattico Sperimentale dell'Abruzzo e Molise "G. Caporale"      | Lorusso A, Marcacci M, Di Domenico M, Ancora M, Curini V, Mangone I, Rinaldi A, Scialabba S, Di Pasquale A, Cammà C, Puglia I, Calistri P, Savini G                                                                                                                                                                                                                    |
| EPI_ISL_1121039, EPI_ISL_1121040                                                                                                                                                                                                                                               | Public Health Virology-Forensic and Scientific Services                        | Public Health Virology-Forensic and Scientific Services                        | Son Nguyen                                                                                                                                                                                                                                                                                                                                                             |
| EPI_ISL_1121103                                                                                                                                                                                                                                                                | Nebraska Public Health Laboratory                                              | NPHL COVID-19 Response Team                                                    | NPHL COVID-19 Response Team                                                                                                                                                                                                                                                                                                                                            |
| EPI_ISL_1121155, EPI_ISL_1121156, EPI_ISL_1121158, EPI_ISL_1121159, EPI_ISL_1121160, EPI_ISL_1121161, EPI_ISL_1121162, EPI_ISL_1121163, EPI_ISL_1121164, EPI_ISL_1121165, EPI_ISL_1121166, EPI_ISL_1121168, EPI_ISL_1121169                                                    | SYNLAB - Laboratoire J. Collard                                                | GIGA Medical Genomics                                                          | Keith Durkin, Maria Artesi, Sébastien Bontems, Raphaël Boreux, Bouchra Boujemla, Nathalie Renotte, Cécile Meex, Pierrette Melin, Marie-Pierre Hayette, Vincent Bours                                                                                                                                                                                                   |
| see above                                                                                                                                                                                                                                                                      |                                                                                |                                                                                |                                                                                                                                                                                                                                                                                                                                                                        |
| EPI_ISL_1121171                                                                                                                                                                                                                                                                | University of Liège COVID-19 testing center                                    | GIGA Medical Genomics                                                          | Keith Durkin, Maria Artesi, Bouchra Boujemla, Nathalie Renotte, Cécile Meex, Sébastien Bontems, Fabrice Bureau, Laurent Gillet, Wouter Coppieters, Marie-Pierre Hayette, Vincent Bours                                                                                                                                                                                 |
| EPI_ISL_1121172                                                                                                                                                                                                                                                                | SYNLAB - Laboratoire J. Collard                                                | GIGA Medical Genomics                                                          | Keith Durkin, Maria Artesi, Sébastien Bontems, Raphaël Boreux, Bouchra Boujemla, Nathalie Renotte, Cécile Meex, Pierrette Melin, Marie-Pierre Hayette, Vincent Bours                                                                                                                                                                                                   |
| EPI_ISL_1121173                                                                                                                                                                                                                                                                | Department of Clinical Microbiology                                            | GIGA Medical Genomics                                                          | Keith Durkin, Maria Artesi, Sébastien Bontems, Raphaël Boreux, Bouchra Boujemla, Nathalie Renotte, Cécile Meex, Pierrette Melin, Marie-Pierre Hayette, Vincent Bours                                                                                                                                                                                                   |
| EPI_ISL_1121174, EPI_ISL_1121175, EPI_ISL_1121176                                                                                                                                                                                                                              | SYNLAB - Laboratoire J. Collard                                                | GIGA Medical Genomics                                                          | Keith Durkin, Maria Artesi, Sébastien Bontems, Raphaël Boreux, Bouchra Boujemla, Nathalie Renotte, Cécile Meex, Pierrette Melin, Marie-Pierre Hayette, Vincent Bours                                                                                                                                                                                                   |
| EPI_ISL_1121179, EPI_ISL_1121183                                                                                                                                                                                                                                               | University of Liège COVID-19 testing center                                    | GIGA Medical Genomics                                                          | Keith Durkin, Maria Artesi, Bouchra Boujemla, Nathalie Renotte, Cécile Meex, Sébastien Bontems, Fabrice Bureau, Laurent Gillet, Wouter Coppieters, Marie-Pierre Hayette, Vincent Bours                                                                                                                                                                                 |
| EPI_ISL_1121184                                                                                                                                                                                                                                                                | Department of Clinical Microbiology                                            | GIGA Medical Genomics                                                          | Keith Durkin, Maria Artesi, Sébastien Bontems, Raphaël Boreux, Bouchra Boujemla, Nathalie Renotte, Cécile Meex, Pierrette Melin, Marie-Pierre Hayette, Vincent Bours                                                                                                                                                                                                   |
| EPI_ISL_1121186, EPI_ISL_1121187, EPI_ISL_1121191, EPI_ISL_1121193, EPI_ISL_1121194, EPI_ISL_1121206                                                                                                                                                                           | SYNLAB - Laboratoire J. Collard                                                | GIGA Medical Genomics                                                          | Keith Durkin, Maria Artesi, Sébastien Bontems, Raphaël Boreux, Bouchra Boujemla, Nathalie Renotte, Cécile Meex, Pierrette Melin, Marie-Pierre Hayette, Vincent Bours                                                                                                                                                                                                   |
| EPI_ISL_1121207, EPI_ISL_1121208, EPI_ISL_1121209, EPI_ISL_1121211, EPI_ISL_1121215, EPI_ISL_1121216                                                                                                                                                                           | University of Liège COVID-19 testing center                                    | GIGA Medical Genomics                                                          | Keith Durkin, Maria Artesi, Bouchra Boujemla, Nathalie Renotte, Cécile Meex, Sébastien Bontems, Fabrice Bureau, Laurent Gillet, Wouter Coppieters, Marie-Pierre Hayette, Vincent Bours                                                                                                                                                                                 |



EPI\_ISL\_1121242, EPI\_ISL\_1121243,  
EPI\_ISL\_1121244, EPI\_ISL\_1121245,  
EPI\_ISL\_1121246, EPI\_ISL\_1121247,  
EPI\_ISL\_1121249

Maryland Public Health Laboratory

Maryland Public Health Laboratory

Maryland Department of Health Laboratories Administration

We gratefully acknowledge the following Authors from the Originating laboratories responsible for obtaining the specimens, as well as the Submitting laboratories where the genome data were generated and shared via GISAID, on which this research is based.

All Submitters of data may be contacted directly via [www.gisaid.org](http://www.gisaid.org)

Authors are sorted alphabetically.

| Accession ID                                                                                                                                                                                                                                                                                                                                                        | Originating Laboratory                                                                              | Submitting Laboratory                                                                                                             | Authors                                                                                                                                                                                                                                                                                                                                                                                                                                                            |
|---------------------------------------------------------------------------------------------------------------------------------------------------------------------------------------------------------------------------------------------------------------------------------------------------------------------------------------------------------------------|-----------------------------------------------------------------------------------------------------|-----------------------------------------------------------------------------------------------------------------------------------|--------------------------------------------------------------------------------------------------------------------------------------------------------------------------------------------------------------------------------------------------------------------------------------------------------------------------------------------------------------------------------------------------------------------------------------------------------------------|
| EPI_ISL_1121250, EPI_ISL_1121251, EPI_ISL_1121252, EPI_ISL_1121253, EPI_ISL_1121254, EPI_ISL_1121264, EPI_ISL_1121265, EPI_ISL_1121267, EPI_ISL_1121274, EPI_ISL_1121275, EPI_ISL_1121276, EPI_ISL_1121277, EPI_ISL_1121279, EPI_ISL_1121280                                                                                                                        |                                                                                                     |                                                                                                                                   |                                                                                                                                                                                                                                                                                                                                                                                                                                                                    |
| see above                                                                                                                                                                                                                                                                                                                                                           | Maryland Public Health Laboratory                                                                   | Maryland Public Health Laboratory                                                                                                 | Maryland Department of Health Laboratories Administration                                                                                                                                                                                                                                                                                                                                                                                                          |
| EPI_ISL_1121281, EPI_ISL_1121282, EPI_ISL_1121283, EPI_ISL_1121284, EPI_ISL_1121285, EPI_ISL_1121286, EPI_ISL_1121287, EPI_ISL_1121288, EPI_ISL_1121289, EPI_ISL_1121290, EPI_ISL_1121291, EPI_ISL_1121292, EPI_ISL_1121293, EPI_ISL_1121294, EPI_ISL_1121295, EPI_ISL_1121296, EPI_ISL_1121297, EPI_ISL_1121298, EPI_ISL_1121300, EPI_ISL_1121301, EPI_ISL_1121302 |                                                                                                     |                                                                                                                                   |                                                                                                                                                                                                                                                                                                                                                                                                                                                                    |
| see above                                                                                                                                                                                                                                                                                                                                                           | DC Public Health Lab/ Dept. of Forensic Sciences                                                    | DC Public Health Lab/ Dept. of Forensic Sciences                                                                                  | Scott Nguyen, Janis Doss, Elizabeth Zelaya, Connie Maza, Monica Mann, Brittany Hamilton, David Payne, Jocelyn Hauser                                                                                                                                                                                                                                                                                                                                               |
| EPI_ISL_1121317, EPI_ISL_1121320, EPI_ISL_1121321                                                                                                                                                                                                                                                                                                                   | IAL Regional de Bauru                                                                               | Instituto Adolfo Lutz, Interdisciplinary Procedures Center, Strategic Laboratory                                                  | Claudio Tavares Sacchi, Claudia Regina Gonçalves, Erica Valessa Ramos Gomes, Karoline Rodrigues Campos, Caio Vinicius Dias Lopes                                                                                                                                                                                                                                                                                                                                   |
| EPI_ISL_1121323                                                                                                                                                                                                                                                                                                                                                     | Complexo Hospitalar Padre Bentode Guarulhos                                                         | Instituto Adolfo Lutz, Interdisciplinary Procedures Center, Strategic Laboratory                                                  | Claudio Tavares Sacchi, Claudia Regina Gonçalves, Erica Valessa Ramos Gomes, Karoline Rodrigues Campos, Caio Vinicius Dias Lopes                                                                                                                                                                                                                                                                                                                                   |
| EPI_ISL_1121510, EPI_ISL_1121514                                                                                                                                                                                                                                                                                                                                    | New Mexico Department of Health Scientific Laboratory                                               | Center for Global Health, University of New Mexico Health Sciences Center                                                         | Daryl Domman, Kurt Schwalm, Twila Kunde, Joseph Hicks, Anastacia Griego, Michael Edwards, Darrell Dinwiddie                                                                                                                                                                                                                                                                                                                                                        |
| EPI_ISL_1121557, EPI_ISL_1121559                                                                                                                                                                                                                                                                                                                                    | Minnesota Department of Health, Public Health Laboratory                                            | Minnesota Department of Health, Public Health Laboratory                                                                          | Alexandra Lorentz, Jacob Garfin, Matt Plumb, and Xiong Wang                                                                                                                                                                                                                                                                                                                                                                                                        |
| EPI_ISL_1121560, EPI_ISL_1121576, EPI_ISL_1121585, EPI_ISL_1121586                                                                                                                                                                                                                                                                                                  | M Health Fairview                                                                                   | Minnesota Department of Health, Public Health Laboratory                                                                          | Alexandra Lorentz, Jacob Garfin, Matt Plumb, and Xiong Wang                                                                                                                                                                                                                                                                                                                                                                                                        |
| EPI_ISL_1121787, EPI_ISL_1121790, EPI_ISL_1121792, EPI_ISL_1121793, EPI_ISL_1121795, EPI_ISL_1121796, EPI_ISL_1121797, EPI_ISL_1121799, EPI_ISL_1121806, EPI_ISL_1121808, EPI_ISL_1121810, EPI_ISL_1121812                                                                                                                                                          |                                                                                                     |                                                                                                                                   |                                                                                                                                                                                                                                                                                                                                                                                                                                                                    |
| see above                                                                                                                                                                                                                                                                                                                                                           | Massachusetts General Hospital                                                                      | Infectious Disease Program, Broad Institute of Harvard and MIT                                                                    | Lemieux,J.E., Siddle,K.J., Shaw,B., Adams,G., Pierce,V., Turbett,S., Anahtar,M., Branda,J., Slater,D., Harris,J., Lin,A.E., Gladden-Young,A., Lagerborg,K., Rudy,M., DeRuff,K., Carter,A., Normandin,E., Bauer,M., Reilly,S., Tomkins-Tinch,C., Loreth,C., Chaluvadi,S., Neumann,A., Cusick,C., Chapman,S.B., Gnirke,A., Flowers,K., Cerrato,F., Birren,B.W., Gallagher,G., Smole,S., Park,D.J., MacInnis,B.L., Ryan,E., LaRocque,R., Rosenberg,E. and Sabeti,P.C. |
| EPI_ISL_1121816, EPI_ISL_1121821, EPI_ISL_1121822, EPI_ISL_1121824, EPI_ISL_1121825, EPI_ISL_1121830, EPI_ISL_1121838, EPI_ISL_1121841, EPI_ISL_1121851, EPI_ISL_1121861, EPI_ISL_1121865, EPI_ISL_1121866, EPI_ISL_1121867, EPI_ISL_1121868, EPI_ISL_1121875, EPI_ISL_1121877, EPI_ISL_1121878                                                                     |                                                                                                     |                                                                                                                                   |                                                                                                                                                                                                                                                                                                                                                                                                                                                                    |
| see above                                                                                                                                                                                                                                                                                                                                                           | Rhode Island Department of Health                                                                   | Infectious Disease Program, Broad Institute of Harvard and MIT                                                                    | Lemieux,J.E., Siddle,K.J., Huard,R., King,E., Azevedo,K., Miller,A., Adams,G., Gladden-Young,A., Lagerborg,K., Rudy,M., DeRuff,K., Carter,A., Normandin,E., Bauer,M., Reilly,S., Tomkins-Tinch,C., Loreth,C., Chaluvadi,S., Birren,B.W., Gallagher,G., Smole,S., Park,D.J., MacInnis,B.L., and Sabeti,P.C.                                                                                                                                                         |
| EPI_ISL_1121887                                                                                                                                                                                                                                                                                                                                                     | Department of Health & Mental Hygiene Corona                                                        | New York City Public Health Laboratory                                                                                            | Jade Wang, et al.                                                                                                                                                                                                                                                                                                                                                                                                                                                  |
| EPI_ISL_1121890                                                                                                                                                                                                                                                                                                                                                     | Department of Health & Mental Hygiene Crown Heights                                                 | New York City Public Health Laboratory                                                                                            | Jade Wang, et al.                                                                                                                                                                                                                                                                                                                                                                                                                                                  |
| EPI_ISL_1121896                                                                                                                                                                                                                                                                                                                                                     | OCME Office Of Chief Medical Examiner                                                               | New York City Public Health Laboratory                                                                                            | Jade Wang, et al.                                                                                                                                                                                                                                                                                                                                                                                                                                                  |
| EPI_ISL_1121903                                                                                                                                                                                                                                                                                                                                                     | Department of Health & Mental Hygiene Fort Greene                                                   | New York City Public Health Laboratory                                                                                            | Jade Wang, et al.                                                                                                                                                                                                                                                                                                                                                                                                                                                  |
| EPI_ISL_1121908                                                                                                                                                                                                                                                                                                                                                     | Department of Health & Mental Hygiene Corona                                                        | New York City Public Health Laboratory                                                                                            | Jade Wang, et al.                                                                                                                                                                                                                                                                                                                                                                                                                                                  |
| EPI_ISL_1121912                                                                                                                                                                                                                                                                                                                                                     | Department of Health & Mental Hygiene PHL                                                           | New York City Public Health Laboratory                                                                                            | Jade Wang, et al.                                                                                                                                                                                                                                                                                                                                                                                                                                                  |
| EPI_ISL_1121913                                                                                                                                                                                                                                                                                                                                                     | Department of Health & Mental Hygiene Morrisania                                                    | New York City Public Health Laboratory                                                                                            | Jade Wang, et al.                                                                                                                                                                                                                                                                                                                                                                                                                                                  |
| EPI_ISL_1121915, EPI_ISL_1121918                                                                                                                                                                                                                                                                                                                                    | Department of Health & Mental Hygiene Jamaica                                                       | New York City Public Health Laboratory                                                                                            | Jade Wang, et al.                                                                                                                                                                                                                                                                                                                                                                                                                                                  |
| EPI_ISL_1121922, EPI_ISL_1121923                                                                                                                                                                                                                                                                                                                                    | Department of Health & Mental Hygiene Morrisania                                                    | New York City Public Health Laboratory                                                                                            | Jade Wang, et al.                                                                                                                                                                                                                                                                                                                                                                                                                                                  |
| EPI_ISL_1121924                                                                                                                                                                                                                                                                                                                                                     | Department of Health & Mental Hygiene Jamaica                                                       | New York City Public Health Laboratory                                                                                            | Jade Wang, et al.                                                                                                                                                                                                                                                                                                                                                                                                                                                  |
| EPI_ISL_1121925                                                                                                                                                                                                                                                                                                                                                     | Department of Health & Mental Hygiene Chelsea                                                       | New York City Public Health Laboratory                                                                                            | Jade Wang, et al.                                                                                                                                                                                                                                                                                                                                                                                                                                                  |
| EPI_ISL_1121930                                                                                                                                                                                                                                                                                                                                                     | Department of Health & Mental Hygiene PHL                                                           | New York City Public Health Laboratory                                                                                            | Jade Wang, et al.                                                                                                                                                                                                                                                                                                                                                                                                                                                  |
| EPI_ISL_1121932                                                                                                                                                                                                                                                                                                                                                     | Department of Health & Mental Hygiene Corona                                                        | New York City Public Health Laboratory                                                                                            | Jade Wang, et al.                                                                                                                                                                                                                                                                                                                                                                                                                                                  |
| EPI_ISL_1121937                                                                                                                                                                                                                                                                                                                                                     | Department of Health & Mental Hygiene Fort Greene                                                   | New York City Public Health Laboratory                                                                                            | Jade Wang, et al.                                                                                                                                                                                                                                                                                                                                                                                                                                                  |
| EPI_ISL_1121939                                                                                                                                                                                                                                                                                                                                                     | Department of Health & Mental Hygiene Crown Heights                                                 | New York City Public Health Laboratory                                                                                            | Jade Wang, et al.                                                                                                                                                                                                                                                                                                                                                                                                                                                  |
| EPI_ISL_1121943                                                                                                                                                                                                                                                                                                                                                     | Department of Health & Mental Hygiene Riverside                                                     | New York City Public Health Laboratory                                                                                            | Jade Wang, et al.                                                                                                                                                                                                                                                                                                                                                                                                                                                  |
| EPI_ISL_1121944                                                                                                                                                                                                                                                                                                                                                     | Department of Health & Mental Hygiene Morrisania                                                    | New York City Public Health Laboratory                                                                                            | Jade Wang, et al.                                                                                                                                                                                                                                                                                                                                                                                                                                                  |
| EPI_ISL_1121945, EPI_ISL_1121946                                                                                                                                                                                                                                                                                                                                    | Department of Health & Mental Hygiene Central Harlem                                                | New York City Public Health Laboratory                                                                                            | Jade Wang, et al.                                                                                                                                                                                                                                                                                                                                                                                                                                                  |
| EPI_ISL_1121947                                                                                                                                                                                                                                                                                                                                                     | Department of Health & Mental Hygiene Morrisania                                                    | New York City Public Health Laboratory                                                                                            | Jade Wang, et al.                                                                                                                                                                                                                                                                                                                                                                                                                                                  |
| EPI_ISL_1121954, EPI_ISL_1121955, EPI_ISL_1121956, EPI_ISL_1121957, EPI_ISL_1121959                                                                                                                                                                                                                                                                                 | Department of Health & Mental Hygiene Jamaica                                                       | New York City Public Health Laboratory                                                                                            | Jade Wang, et al.                                                                                                                                                                                                                                                                                                                                                                                                                                                  |
| EPI_ISL_1121960                                                                                                                                                                                                                                                                                                                                                     | Department of Health & Mental Hygiene Chelsea                                                       | New York City Public Health Laboratory                                                                                            | Jade Wang, et al.                                                                                                                                                                                                                                                                                                                                                                                                                                                  |
| EPI_ISL_1121974, EPI_ISL_1121975                                                                                                                                                                                                                                                                                                                                    | Area of Virology, Serology and Virology Division (SAVID), New South Wales Health Pathology Randwick | Virology Research Laboratory; Area of Virology, Serology and Virology Division (SAVID), New South Wales Health Pathology Randwick | Foster, C.; Au, J.; Ruiz Silva, M.; Deveson, I.; Bull, R.; Van Hal, S.; Rawlinson, W.                                                                                                                                                                                                                                                                                                                                                                              |
| EPI_ISL_1121977, EPI_ISL_1121978, EPI_ISL_1121982, EPI_ISL_1121984, EPI_ISL_1121985, EPI_ISL_1121986, EPI_ISL_1121987, EPI_ISL_1121989                                                                                                                                                                                                                              | New South Wales Health Pathology Royal Prince Alfred Hospital                                       | Microbiology RPAH                                                                                                                 | Foster, C.; Au, J.; Ruiz Silva, M.; Deveson, I.; Bull, R.; Van Hal, S.; Rawlinson, W.                                                                                                                                                                                                                                                                                                                                                                              |
| EPI_ISL_1122005, EPI_ISL_1122006, EPI_ISL_1122007, EPI_ISL_1122008, EPI_ISL_1122009, EPI_ISL_1122010                                                                                                                                                                                                                                                                | Kentucky State Public Health Lab                                                                    | Kentucky State Public Health Lab                                                                                                  | Stephanie Lunn, Karim George, Joshua Tobias, William Grooms, Vaneeet Arora, Matthew Johnson, Rachel Zinner, Rhonda Lucas                                                                                                                                                                                                                                                                                                                                           |
| EPI_ISL_1122460, EPI_ISL_1122461, EPI_ISL_1122463, EPI_ISL_1122464,                                                                                                                                                                                                                                                                                                 | Lighthouse Lab in Alderley Park                                                                     | Wellcome Sanger Institute for the COVID-19 Genomics UK (COG-UK) Consortium                                                        | Jacquelyn Wynn, Mairead Hyland, The Lighthouse Lab in Alderley Park and Alex Alderton, Roberto Amato, Jeffrey Barrett, Sonia Goncalves, Ewan Harrison, David K. Jackson, Ian Johnston, Dominic Kwiatkowski, Cordelia Langford, John Sillitoe on behalf of the Wellcome Sanger Institute COVID-19                                                                                                                                                                   |

[illegible]

[illegible]







[illegible]



[illegible]

[illegible]

[illegible]





[illegible]

[illegible]





|                                                                                                                                                                                                                                                                                                                                                                                                                                                                                                                                                                                                                                                                                                                                                                                                                                                                                                                                                                                                                                                                                                                                                                                                                                                                                                                                                                                                                                                                                                                                                                                                                                                                                                                                                                                                                                                                                                                                                                                                                                                                                                                                                                                                                                                                                                                                                                                        |                                                                                                                                        |                                                                                                                                        |                                                                                                                                                                                                     |
|----------------------------------------------------------------------------------------------------------------------------------------------------------------------------------------------------------------------------------------------------------------------------------------------------------------------------------------------------------------------------------------------------------------------------------------------------------------------------------------------------------------------------------------------------------------------------------------------------------------------------------------------------------------------------------------------------------------------------------------------------------------------------------------------------------------------------------------------------------------------------------------------------------------------------------------------------------------------------------------------------------------------------------------------------------------------------------------------------------------------------------------------------------------------------------------------------------------------------------------------------------------------------------------------------------------------------------------------------------------------------------------------------------------------------------------------------------------------------------------------------------------------------------------------------------------------------------------------------------------------------------------------------------------------------------------------------------------------------------------------------------------------------------------------------------------------------------------------------------------------------------------------------------------------------------------------------------------------------------------------------------------------------------------------------------------------------------------------------------------------------------------------------------------------------------------------------------------------------------------------------------------------------------------------------------------------------------------------------------------------------------------|----------------------------------------------------------------------------------------------------------------------------------------|----------------------------------------------------------------------------------------------------------------------------------------|-----------------------------------------------------------------------------------------------------------------------------------------------------------------------------------------------------|
| EPI_ISL_1137174, EPI_ISL_1137175, EPI_ISL_1137176, EPI_ISL_1137177, EPI_ISL_1137178, EPI_ISL_1137179, EPI_ISL_1137180, EPI_ISL_1137181, EPI_ISL_1137182, EPI_ISL_1137183, EPI_ISL_1137184                                                                                                                                                                                                                                                                                                                                                                                                                                                                                                                                                                                                                                                                                                                                                                                                                                                                                                                                                                                                                                                                                                                                                                                                                                                                                                                                                                                                                                                                                                                                                                                                                                                                                                                                                                                                                                                                                                                                                                                                                                                                                                                                                                                              |                                                                                                                                        |                                                                                                                                        |                                                                                                                                                                                                     |
| see above                                                                                                                                                                                                                                                                                                                                                                                                                                                                                                                                                                                                                                                                                                                                                                                                                                                                                                                                                                                                                                                                                                                                                                                                                                                                                                                                                                                                                                                                                                                                                                                                                                                                                                                                                                                                                                                                                                                                                                                                                                                                                                                                                                                                                                                                                                                                                                              | UPMC Clinical Microbiology Laboratory                                                                                                  | Microbial Genome Sequencing Center; Microbial Genomic Epidemiology Laboratory, University of Pittsburgh                                | Lee H. Harrison, Jane W. Marsh, Marissa P. Griffith, Stephanie L. Mitchell, Vatsala R. Srinivasa, Kady D. Waggle, Daniel J. Snyder, Vaughn S. Cooper                                                |
| EPI_ISL_1137460, EPI_ISL_1137462, EPI_ISL_1137463, EPI_ISL_1137464, EPI_ISL_1137467, EPI_ISL_1137468, EPI_ISL_1137470, EPI_ISL_1137471, EPI_ISL_1137473, EPI_ISL_1137474                                                                                                                                                                                                                                                                                                                                                                                                                                                                                                                                                                                                                                                                                                                                                                                                                                                                                                                                                                                                                                                                                                                                                                                                                                                                                                                                                                                                                                                                                                                                                                                                                                                                                                                                                                                                                                                                                                                                                                                                                                                                                                                                                                                                               | Instituto Nacional de Medicina Genomica                                                                                                | Instituto Nacional de Medicina Genomica                                                                                                | Hidalgo-Miranda A, Mendoza-Vargas A, Reyes-Grajeda JP, Cedro-Tanda A, Alcaraz N, Gonzalez-Barrera D, Rangel-DeLeon D, Ramirez-Vega O, Sifuentes-Rojas C, Cisneros-Villanueva M, Herrera-Montalvo LA |
| EPI_ISL_1137506, EPI_ISL_1137507, EPI_ISL_1137509, EPI_ISL_1137510, EPI_ISL_1137511, EPI_ISL_1137513, EPI_ISL_1137514, EPI_ISL_1137515, EPI_ISL_1137516, EPI_ISL_1137517, EPI_ISL_1137519, EPI_ISL_1137520, EPI_ISL_1137522, EPI_ISL_1137523, EPI_ISL_1137526, EPI_ISL_1137529, EPI_ISL_1137532, EPI_ISL_1137534, EPI_ISL_1137537, EPI_ISL_1137538, EPI_ISL_1137539, EPI_ISL_1137546, EPI_ISL_1137547, EPI_ISL_1137550, EPI_ISL_1137551, EPI_ISL_1137553, EPI_ISL_1137554, EPI_ISL_1137556, EPI_ISL_1137557, EPI_ISL_1137560, EPI_ISL_1137562, EPI_ISL_1137565, EPI_ISL_1137567, EPI_ISL_1137568, EPI_ISL_1137573, EPI_ISL_1137574, EPI_ISL_1137587, EPI_ISL_1137588, EPI_ISL_1137589, EPI_ISL_1137590, EPI_ISL_1137592, EPI_ISL_1137593, EPI_ISL_1137594, EPI_ISL_1137596, EPI_ISL_1137598                                                                                                                                                                                                                                                                                                                                                                                                                                                                                                                                                                                                                                                                                                                                                                                                                                                                                                                                                                                                                                                                                                                                                                                                                                                                                                                                                                                                                                                                                                                                                                                            | Clinical Molecular Microbiology Laboratory, UNC Hospitals                                                                              | Jeremy Wang                                                                                                                            | Jeremy Wang, Alexander Rubinsteyn, Colleen Rice, Jason Smedberg, Shawn Hawken, Melissa Miller, Corbin Jones, Robert Hagan                                                                           |
| EPI_ISL_1138554, EPI_ISL_1138555, EPI_ISL_1138556, EPI_ISL_1138557, EPI_ISL_1138559, EPI_ISL_1138561, EPI_ISL_1138564, EPI_ISL_1138566                                                                                                                                                                                                                                                                                                                                                                                                                                                                                                                                                                                                                                                                                                                                                                                                                                                                                                                                                                                                                                                                                                                                                                                                                                                                                                                                                                                                                                                                                                                                                                                                                                                                                                                                                                                                                                                                                                                                                                                                                                                                                                                                                                                                                                                 | Laboratory of Communicable Diseases                                                                                                    | 1. Laboratory of Communicable Diseases (Estonia); 2. Eurofins Genomics Europe Sequencing GmbH                                          | Lidia Dotsenko                                                                                                                                                                                      |
| EPI_ISL_1138567                                                                                                                                                                                                                                                                                                                                                                                                                                                                                                                                                                                                                                                                                                                                                                                                                                                                                                                                                                                                                                                                                                                                                                                                                                                                                                                                                                                                                                                                                                                                                                                                                                                                                                                                                                                                                                                                                                                                                                                                                                                                                                                                                                                                                                                                                                                                                                        | SA Pärnu Hospital Laboratory                                                                                                           | 1. Laboratory of Communicable Diseases (Estonia); 2. Eurofins Genomics Europe Sequencing GmbH                                          | Lidia Dotsenko                                                                                                                                                                                      |
| EPI_ISL_1138568, EPI_ISL_1138569, EPI_ISL_1138570, EPI_ISL_1138571, EPI_ISL_1138572                                                                                                                                                                                                                                                                                                                                                                                                                                                                                                                                                                                                                                                                                                                                                                                                                                                                                                                                                                                                                                                                                                                                                                                                                                                                                                                                                                                                                                                                                                                                                                                                                                                                                                                                                                                                                                                                                                                                                                                                                                                                                                                                                                                                                                                                                                    | Laboratory of Communicable Diseases                                                                                                    | 1. Laboratory of Communicable Diseases (Estonia); 2. Eurofins Genomics Europe Sequencing GmbH                                          | Lidia Dotsenko                                                                                                                                                                                      |
| EPI_ISL_1138573, EPI_ISL_1138574, EPI_ISL_1138575, EPI_ISL_1138577, EPI_ISL_1138579, EPI_ISL_1138580, EPI_ISL_1138581, EPI_ISL_1138583, EPI_ISL_1138586, EPI_ISL_1138590, EPI_ISL_1138592, EPI_ISL_1138593, EPI_ISL_1138594, EPI_ISL_1138596                                                                                                                                                                                                                                                                                                                                                                                                                                                                                                                                                                                                                                                                                                                                                                                                                                                                                                                                                                                                                                                                                                                                                                                                                                                                                                                                                                                                                                                                                                                                                                                                                                                                                                                                                                                                                                                                                                                                                                                                                                                                                                                                           |                                                                                                                                        |                                                                                                                                        |                                                                                                                                                                                                     |
| see above                                                                                                                                                                                                                                                                                                                                                                                                                                                                                                                                                                                                                                                                                                                                                                                                                                                                                                                                                                                                                                                                                                                                                                                                                                                                                                                                                                                                                                                                                                                                                                                                                                                                                                                                                                                                                                                                                                                                                                                                                                                                                                                                                                                                                                                                                                                                                                              | SYNLAB Eesti OÜ                                                                                                                        | 1. Laboratory of Communicable Diseases (Estonia); 2. Eurofins Genomics Europe Sequencing GmbH                                          | Lidia Dotsenko                                                                                                                                                                                      |
| EPI_ISL_1138743, EPI_ISL_1138744                                                                                                                                                                                                                                                                                                                                                                                                                                                                                                                                                                                                                                                                                                                                                                                                                                                                                                                                                                                                                                                                                                                                                                                                                                                                                                                                                                                                                                                                                                                                                                                                                                                                                                                                                                                                                                                                                                                                                                                                                                                                                                                                                                                                                                                                                                                                                       | General Hospital - Struga                                                                                                              | Research Center for Genetic Engineering and Biotechnology "Georgi D. Efremov" , Macedonian Academy of Sciences and Arts                | Aleksandar J. Dimovski, Dijana Plasheska-Karanfilska, Predrag Noveski, Gjorgji Bozinovski, Milena Jakimovska                                                                                        |
| EPI_ISL_1138748, EPI_ISL_1138751                                                                                                                                                                                                                                                                                                                                                                                                                                                                                                                                                                                                                                                                                                                                                                                                                                                                                                                                                                                                                                                                                                                                                                                                                                                                                                                                                                                                                                                                                                                                                                                                                                                                                                                                                                                                                                                                                                                                                                                                                                                                                                                                                                                                                                                                                                                                                       | General Hospital - Shtip                                                                                                               | Research Center for Genetic Engineering and Biotechnology "Georgi D. Efremov" , Macedonian Academy of Sciences and Arts                | Aleksandar J. Dimovski, Dijana Plasheska-Karanfilska, Predrag Noveski, Gjorgji Bozinovski, Milena Jakimovska                                                                                        |
| EPI_ISL_1138752                                                                                                                                                                                                                                                                                                                                                                                                                                                                                                                                                                                                                                                                                                                                                                                                                                                                                                                                                                                                                                                                                                                                                                                                                                                                                                                                                                                                                                                                                                                                                                                                                                                                                                                                                                                                                                                                                                                                                                                                                                                                                                                                                                                                                                                                                                                                                                        | General Hospital - Ohrid                                                                                                               | Research Center for Genetic Engineering and Biotechnology "Georgi D. Efremov" , Macedonian Academy of Sciences and Arts                | Aleksandar J. Dimovski, Dijana Plasheska-Karanfilska, Predrag Noveski, Gjorgji Bozinovski, Milena Jakimovska                                                                                        |
| EPI_ISL_1138753, EPI_ISL_1138754                                                                                                                                                                                                                                                                                                                                                                                                                                                                                                                                                                                                                                                                                                                                                                                                                                                                                                                                                                                                                                                                                                                                                                                                                                                                                                                                                                                                                                                                                                                                                                                                                                                                                                                                                                                                                                                                                                                                                                                                                                                                                                                                                                                                                                                                                                                                                       | General Hospital - Struga                                                                                                              | Research Center for Genetic Engineering and Biotechnology "Georgi D. Efremov" , Macedonian Academy of Sciences and Arts                | Aleksandar J. Dimovski, Dijana Plasheska-Karanfilska, Predrag Noveski, Gjorgji Bozinovski, Milena Jakimovska                                                                                        |
| EPI_ISL_1138756                                                                                                                                                                                                                                                                                                                                                                                                                                                                                                                                                                                                                                                                                                                                                                                                                                                                                                                                                                                                                                                                                                                                                                                                                                                                                                                                                                                                                                                                                                                                                                                                                                                                                                                                                                                                                                                                                                                                                                                                                                                                                                                                                                                                                                                                                                                                                                        | Institute of Nephrology - Struga                                                                                                       | Research Center for Genetic Engineering and Biotechnology "Georgi D. Efremov" , Macedonian Academy of Sciences and Arts                | Aleksandar J. Dimovski, Dijana Plasheska-Karanfilska, Predrag Noveski, Gjorgji Bozinovski, Milena Jakimovska                                                                                        |
| EPI_ISL_1138757                                                                                                                                                                                                                                                                                                                                                                                                                                                                                                                                                                                                                                                                                                                                                                                                                                                                                                                                                                                                                                                                                                                                                                                                                                                                                                                                                                                                                                                                                                                                                                                                                                                                                                                                                                                                                                                                                                                                                                                                                                                                                                                                                                                                                                                                                                                                                                        | General Hospital - Strumica                                                                                                            | Research Center for Genetic Engineering and Biotechnology "Georgi D. Efremov" , Macedonian Academy of Sciences and Arts                | Aleksandar J. Dimovski, Dijana Plasheska-Karanfilska, Predrag Noveski, Gjorgji Bozinovski, Milena Jakimovska                                                                                        |
| EPI_ISL_1138758                                                                                                                                                                                                                                                                                                                                                                                                                                                                                                                                                                                                                                                                                                                                                                                                                                                                                                                                                                                                                                                                                                                                                                                                                                                                                                                                                                                                                                                                                                                                                                                                                                                                                                                                                                                                                                                                                                                                                                                                                                                                                                                                                                                                                                                                                                                                                                        | General Hospital - Struga                                                                                                              | Research Center for Genetic Engineering and Biotechnology "Georgi D. Efremov" , Macedonian Academy of Sciences and Arts                | Aleksandar J. Dimovski, Dijana Plasheska-Karanfilska, Predrag Noveski, Gjorgji Bozinovski, Milena Jakimovska                                                                                        |
| EPI_ISL_1138759                                                                                                                                                                                                                                                                                                                                                                                                                                                                                                                                                                                                                                                                                                                                                                                                                                                                                                                                                                                                                                                                                                                                                                                                                                                                                                                                                                                                                                                                                                                                                                                                                                                                                                                                                                                                                                                                                                                                                                                                                                                                                                                                                                                                                                                                                                                                                                        | General Hospital - Prilep                                                                                                              | Research Center for Genetic Engineering and Biotechnology "Georgi D. Efremov" , Macedonian Academy of Sciences and Arts                | Aleksandar J. Dimovski, Dijana Plasheska-Karanfilska, Predrag Noveski, Gjorgji Bozinovski, Milena Jakimovska                                                                                        |
| EPI_ISL_1138760                                                                                                                                                                                                                                                                                                                                                                                                                                                                                                                                                                                                                                                                                                                                                                                                                                                                                                                                                                                                                                                                                                                                                                                                                                                                                                                                                                                                                                                                                                                                                                                                                                                                                                                                                                                                                                                                                                                                                                                                                                                                                                                                                                                                                                                                                                                                                                        | General Hospital - Ohrid                                                                                                               | Research Center for Genetic Engineering and Biotechnology "Georgi D. Efremov" , Macedonian Academy of Sciences and Arts                | Aleksandar J. Dimovski, Dijana Plasheska-Karanfilska, Predrag Noveski, Gjorgji Bozinovski, Milena Jakimovska                                                                                        |
| EPI_ISL_1138885, EPI_ISL_1138887, EPI_ISL_1138889, EPI_ISL_1138893                                                                                                                                                                                                                                                                                                                                                                                                                                                                                                                                                                                                                                                                                                                                                                                                                                                                                                                                                                                                                                                                                                                                                                                                                                                                                                                                                                                                                                                                                                                                                                                                                                                                                                                                                                                                                                                                                                                                                                                                                                                                                                                                                                                                                                                                                                                     | Jessa                                                                                                                                  | Jessa                                                                                                                                  | Cruys et al. on behalf of the Jessa_cmdLab                                                                                                                                                          |
| EPI_ISL_1138904, EPI_ISL_1138912, EPI_ISL_1138919, EPI_ISL_1138920, EPI_ISL_1138921, EPI_ISL_1138922, EPI_ISL_1138923, EPI_ISL_1138924, EPI_ISL_1138925, EPI_ISL_1138926, EPI_ISL_1138928, EPI_ISL_1138929, EPI_ISL_1138930, EPI_ISL_1138931, EPI_ISL_1138932, EPI_ISL_1138933, EPI_ISL_1138934, EPI_ISL_1138935, EPI_ISL_1138936, EPI_ISL_1138937, EPI_ISL_1138938, EPI_ISL_1138939, EPI_ISL_1138940, EPI_ISL_1138944, EPI_ISL_1138945, EPI_ISL_1138946, EPI_ISL_1138947, EPI_ISL_1138948, EPI_ISL_1138949, EPI_ISL_1138950, EPI_ISL_1138951, EPI_ISL_1138952, EPI_ISL_1138953, EPI_ISL_1138954, EPI_ISL_1138955, EPI_ISL_1138956, EPI_ISL_1138957, EPI_ISL_1138958, EPI_ISL_1138959, EPI_ISL_1138965, EPI_ISL_1138968, EPI_ISL_1138971, EPI_ISL_1138972, EPI_ISL_1138973, EPI_ISL_1138976, EPI_ISL_1138978, EPI_ISL_1138979, EPI_ISL_1138980, EPI_ISL_1138982                                                                                                                                                                                                                                                                                                                                                                                                                                                                                                                                                                                                                                                                                                                                                                                                                                                                                                                                                                                                                                                                                                                                                                                                                                                                                                                                                                                                                                                                                                                        | Division of Emerging Infectious Diseases, Bureau of Infectious Diseases Diagnosis Control, Korea Disease Control and Prevention Agency | Division of Emerging Infectious Diseases, Bureau of Infectious Diseases Diagnosis Control, Korea Disease Control and Prevention Agency | Ae Kyung Park, Il-Hwan Kim, Heui Man Kim, Jeong-Min Kim, Namjoo Lee, Chae Young Lee, Sang Hee Woo, Eun-Jin Kim                                                                                      |
| see above                                                                                                                                                                                                                                                                                                                                                                                                                                                                                                                                                                                                                                                                                                                                                                                                                                                                                                                                                                                                                                                                                                                                                                                                                                                                                                                                                                                                                                                                                                                                                                                                                                                                                                                                                                                                                                                                                                                                                                                                                                                                                                                                                                                                                                                                                                                                                                              | Division of Emerging Infectious Diseases, Bureau of Infectious Diseases Diagnosis Control, Korea Disease Control and Prevention Agency | Division of Emerging Infectious Diseases, Bureau of Infectious Diseases Diagnosis Control, Korea Disease Control and Prevention Agency | Ae Kyung Park, Il-Hwan Kim, Heui Man Kim, Jeong-Min Kim, Namjoo Lee, Chae Young Lee, Sang Hee Woo, Eun-Jin Kim                                                                                      |
| EPI_ISL_1139069                                                                                                                                                                                                                                                                                                                                                                                                                                                                                                                                                                                                                                                                                                                                                                                                                                                                                                                                                                                                                                                                                                                                                                                                                                                                                                                                                                                                                                                                                                                                                                                                                                                                                                                                                                                                                                                                                                                                                                                                                                                                                                                                                                                                                                                                                                                                                                        | SMS Aruja                                                                                                                              | Instituto Adolfo Lutz, Interdisciplinary Procedures Center, Strategic Laboratory                                                       | Claudio Tavares Sacchi, Claudia Regina Gonçalves, Erica Valesa Ramos Gomes, Karoline Rodrigues Campos, Caio Vinicius Dias Lopes                                                                     |
| EPI_ISL_1139074                                                                                                                                                                                                                                                                                                                                                                                                                                                                                                                                                                                                                                                                                                                                                                                                                                                                                                                                                                                                                                                                                                                                                                                                                                                                                                                                                                                                                                                                                                                                                                                                                                                                                                                                                                                                                                                                                                                                                                                                                                                                                                                                                                                                                                                                                                                                                                        | Instituto Adolfo Lutz Central                                                                                                          | Instituto Adolfo Lutz, Interdisciplinary Procedures Center, Strategic Laboratory                                                       | Claudio Tavares Sacchi, Claudia Regina Gonçalves, Erica Valesa Ramos Gomes, Karoline Rodrigues Campos, Caio Vinicius Dias Lopes                                                                     |
| EPI_ISL_1139075                                                                                                                                                                                                                                                                                                                                                                                                                                                                                                                                                                                                                                                                                                                                                                                                                                                                                                                                                                                                                                                                                                                                                                                                                                                                                                                                                                                                                                                                                                                                                                                                                                                                                                                                                                                                                                                                                                                                                                                                                                                                                                                                                                                                                                                                                                                                                                        | Lab Loc - Itapeperica da Serra                                                                                                         | Instituto Adolfo Lutz, Interdisciplinary Procedures Center, Strategic Laboratory                                                       | Claudio Tavares Sacchi, Claudia Regina Gonçalves, Erica Valesa Ramos Gomes, Karoline Rodrigues Campos, Caio Vinicius Dias Lopes                                                                     |
| EPI_ISL_1139158                                                                                                                                                                                                                                                                                                                                                                                                                                                                                                                                                                                                                                                                                                                                                                                                                                                                                                                                                                                                                                                                                                                                                                                                                                                                                                                                                                                                                                                                                                                                                                                                                                                                                                                                                                                                                                                                                                                                                                                                                                                                                                                                                                                                                                                                                                                                                                        | Ohio State University Wexner Medical Center                                                                                            | James Molecular Lab                                                                                                                    | D Jones, P Pancholi, P Snyder, Z Rudy                                                                                                                                                               |
| EPI_ISL_1139174, EPI_ISL_1139175, EPI_ISL_1139177, EPI_ISL_1139178, EPI_ISL_1139179, EPI_ISL_1139181, EPI_ISL_1139182, EPI_ISL_1139183, EPI_ISL_1139184, EPI_ISL_1139185, EPI_ISL_1139187, EPI_ISL_1139188, EPI_ISL_1139191, EPI_ISL_1139192, EPI_ISL_1139193, EPI_ISL_1139194, EPI_ISL_1139196, EPI_ISL_1139198, EPI_ISL_1139201, EPI_ISL_1139203, EPI_ISL_1139204, EPI_ISL_1139205, EPI_ISL_1139208, EPI_ISL_1139211, EPI_ISL_1139212, EPI_ISL_1139213, EPI_ISL_1139214, EPI_ISL_1139215, EPI_ISL_1139216, EPI_ISL_1139217, EPI_ISL_1139218, EPI_ISL_1139219, EPI_ISL_1139220, EPI_ISL_1139221, EPI_ISL_1139231, EPI_ISL_1139232, EPI_ISL_1139233, EPI_ISL_1139234, EPI_ISL_1139236, EPI_ISL_1139239, EPI_ISL_1139240, EPI_ISL_1139241, EPI_ISL_1139242, EPI_ISL_1139243, EPI_ISL_1139244, EPI_ISL_1139245, EPI_ISL_1139246, EPI_ISL_1139247, EPI_ISL_1139249, EPI_ISL_1139250, EPI_ISL_1139253, EPI_ISL_1139254, EPI_ISL_1139255, EPI_ISL_1139256, EPI_ISL_1139259, EPI_ISL_1139261, EPI_ISL_1139262, EPI_ISL_1139264, EPI_ISL_1139266, EPI_ISL_1139267, EPI_ISL_1139269, EPI_ISL_1139270, EPI_ISL_1139271, EPI_ISL_1139272, EPI_ISL_1139273, EPI_ISL_1139277, EPI_ISL_1139278, EPI_ISL_1139279, EPI_ISL_1139280, EPI_ISL_1139281, EPI_ISL_1139282, EPI_ISL_1139283, EPI_ISL_1139286, EPI_ISL_1139288, EPI_ISL_1139289, EPI_ISL_1139290, EPI_ISL_1139293, EPI_ISL_1139295, EPI_ISL_1139296, EPI_ISL_1139298, EPI_ISL_1139299, EPI_ISL_1139300, EPI_ISL_1139302, EPI_ISL_1139303, EPI_ISL_1139305, EPI_ISL_1139306, EPI_ISL_1139307, EPI_ISL_1139308, EPI_ISL_1139310, EPI_ISL_1139311, EPI_ISL_1139312, EPI_ISL_1139313, EPI_ISL_1139314, EPI_ISL_1139315, EPI_ISL_1139316, EPI_ISL_1139317, EPI_ISL_1139318, EPI_ISL_1139319, EPI_ISL_1139320, EPI_ISL_1139321, EPI_ISL_1139323, EPI_ISL_1139324, EPI_ISL_1139325, EPI_ISL_1139327, EPI_ISL_1139328, EPI_ISL_1139329, EPI_ISL_1139330, EPI_ISL_1139331, EPI_ISL_1139332, EPI_ISL_1139333, EPI_ISL_1139336, EPI_ISL_1139337, EPI_ISL_1139340, EPI_ISL_1139341, EPI_ISL_1139342, EPI_ISL_1139344, EPI_ISL_1139345, EPI_ISL_1139349, EPI_ISL_1139350, EPI_ISL_1139352, EPI_ISL_1139353, EPI_ISL_1139354, EPI_ISL_1139355, EPI_ISL_1139356, EPI_ISL_1139358, EPI_ISL_1139359, EPI_ISL_1139360, EPI_ISL_1139361, EPI_ISL_1139362, EPI_ISL_1139366, EPI_ISL_1139367, EPI_ISL_1139368, EPI_ISL_1139369, EPI_ISL_1139370, EPI_ISL_1139371, |                                                                                                                                        |                                                                                                                                        |                                                                                                                                                                                                     |



|                                                                                                                                                                                                                                                                                |                                                                                                 |                                                                                                                         |                                                                                                              |         |
|--------------------------------------------------------------------------------------------------------------------------------------------------------------------------------------------------------------------------------------------------------------------------------|-------------------------------------------------------------------------------------------------|-------------------------------------------------------------------------------------------------------------------------|--------------------------------------------------------------------------------------------------------------|---------|
| EPI_ISL_1143347                                                                                                                                                                                                                                                                | General Hospital - Tetovo                                                                       | Research Center for Genetic Engineering and Biotechnology "Georgi D. Efremov" , Macedonian Academy of Sciences and Arts | Aleksandar J. Dimovski, Dijana Plasheska-Karanfilska, Predrag Noveski, Gjorgji Bozinovski, Milena Jakimovska |         |
| EPI_ISL_1143390, EPI_ISL_1143392, EPI_ISL_1143393, EPI_ISL_1143396, EPI_ISL_1143397, EPI_ISL_1143398, EPI_ISL_1143400, EPI_ISL_1143402, EPI_ISL_1143405, EPI_ISL_1143407, EPI_ISL_1143410, EPI_ISL_1143412, EPI_ISL_1143413, EPI_ISL_1143414, EPI_ISL_1143415, EPI_ISL_1143417 | see above                                                                                       | Uniklinikum Carl Gustav Carus an der TU Dresden; Institut für Virologie                                                 | Robert Koch Institute                                                                                        | unknown |
| EPI_ISL_1143746                                                                                                                                                                                                                                                                | General Hospital - Kumanovo                                                                     | Research Center for Genetic Engineering and Biotechnology "Georgi D. Efremov" , Macedonian Academy of Sciences and Arts | Aleksandar J. Dimovski, Dijana Plasheska-Karanfilska, Predrag Noveski, Gjorgji Bozinovski, Milena Jakimovska |         |
| EPI_ISL_1143919, EPI_ISL_1143920, EPI_ISL_1143921, EPI_ISL_1143922, EPI_ISL_1143924, EPI_ISL_1143925, EPI_ISL_1143926                                                                                                                                                          | Uniklinikum Regensburg; Institut für Mikrobiologie                                              | Robert Koch Institute                                                                                                   | unknown                                                                                                      |         |
| EPI_ISL_1143927, EPI_ISL_1143940                                                                                                                                                                                                                                               | Uniklinikum Jena                                                                                | Robert Koch Institute                                                                                                   | unknown                                                                                                      |         |
| EPI_ISL_1144019                                                                                                                                                                                                                                                                | Medizinisches Versorgungszentrum für Labormedizin und Mikrobiologie Ruhr GmbH - mvzlm RUHR GmbH | Robert Koch Institute                                                                                                   | unknown                                                                                                      |         |
| EPI_ISL_1144027, EPI_ISL_1144029, EPI_ISL_1144031, EPI_ISL_1144035, EPI_ISL_1144036, EPI_ISL_1144039, EPI_ISL_1144040, EPI_ISL_1144042, EPI_ISL_1144043, EPI_ISL_1144044, EPI_ISL_1144045                                                                                      | see above                                                                                       | MVZ Dr. Eberhard & Partner Dortmund                                                                                     | Robert Koch Institute                                                                                        | unknown |
| EPI_ISL_1144121                                                                                                                                                                                                                                                                | General Hospital - Ohrid                                                                        | Research Center for Genetic Engineering and Biotechnology "Georgi D. Efremov" , Macedonian Academy of Sciences and Arts | Aleksandar J. Dimovski, Dijana Plasheska-Karanfilska, Predrag Noveski, Gjorgji Bozinovski, Milena Jakimovska |         |
| EPI_ISL_1144363                                                                                                                                                                                                                                                                | Institut für Immunologie und Genetik Kaiserslautern: Medizinisches Labor Dr. med. B. Thiele     | Robert Koch Institute                                                                                                   | unknown                                                                                                      |         |
| EPI_ISL_1144377, EPI_ISL_1144378, EPI_ISL_1144380, EPI_ISL_1144381                                                                                                                                                                                                             | IMD Labor Frankfurt                                                                             | Robert Koch Institute                                                                                                   | unknown                                                                                                      |         |
| EPI_ISL_1145003                                                                                                                                                                                                                                                                | Sonic - MVZ Medizinisches Labor Bremen GmbH                                                     | Robert Koch Institute                                                                                                   | unknown                                                                                                      |         |
| EPI_ISL_1145010                                                                                                                                                                                                                                                                | Sonic - Labor Dr. von Foreich GmbH                                                              | Robert Koch Institute                                                                                                   | unknown                                                                                                      |         |
| EPI_ISL_1145020, EPI_ISL_1145038, EPI_ISL_1145041, EPI_ISL_1145044, EPI_ISL_1145053                                                                                                                                                                                            | Bioscientia Labor Wermsdorf                                                                     | Robert Koch Institute                                                                                                   | unknown                                                                                                      |         |
| EPI_ISL_1145068                                                                                                                                                                                                                                                                | Sonic - MVZ Medizinisches Labor Bremen GmbH                                                     | Robert Koch Institute                                                                                                   | unknown                                                                                                      |         |
| EPI_ISL_1145072                                                                                                                                                                                                                                                                | Bioscientia Labor Wermsdorf                                                                     | Robert Koch Institute                                                                                                   | unknown                                                                                                      |         |
| EPI_ISL_1145086                                                                                                                                                                                                                                                                | Sonic - MVZ Medizinisches Labor Bremen GmbH                                                     | Robert Koch Institute                                                                                                   | unknown                                                                                                      |         |
| EPI_ISL_1145090, EPI_ISL_1145092, EPI_ISL_1145099, EPI_ISL_1145100, EPI_ISL_1145105                                                                                                                                                                                            | Bioscientia Labor Wermsdorf                                                                     | Robert Koch Institute                                                                                                   | unknown                                                                                                      |         |
| EPI_ISL_1145107, EPI_ISL_1145115                                                                                                                                                                                                                                               | Sonic - MVZ Medizinisches Labor Bremen GmbH                                                     | Robert Koch Institute                                                                                                   | unknown                                                                                                      |         |
| EPI_ISL_1145121, EPI_ISL_1145122                                                                                                                                                                                                                                               | Bioscientia Labor Wermsdorf                                                                     | Robert Koch Institute                                                                                                   | unknown                                                                                                      |         |
| EPI_ISL_1145129                                                                                                                                                                                                                                                                | Sonic - MVZ Medizinisches Labor Bremen GmbH                                                     | Robert Koch Institute                                                                                                   | unknown                                                                                                      |         |
| EPI_ISL_1145138, EPI_ISL_1145147                                                                                                                                                                                                                                               | Bioscientia Labor Wermsdorf                                                                     | Robert Koch Institute                                                                                                   | unknown                                                                                                      |         |
| EPI_ISL_1145148, EPI_ISL_1145152                                                                                                                                                                                                                                               | Sonic - MVZ Medizinisches Labor Bremen GmbH                                                     | Robert Koch Institute                                                                                                   | unknown                                                                                                      |         |
| EPI_ISL_1145155                                                                                                                                                                                                                                                                | Sonic - Labor Staber MVZ Kassel                                                                 | Robert Koch Institute                                                                                                   | unknown                                                                                                      |         |
| EPI_ISL_1145167, EPI_ISL_1145177, EPI_ISL_1145179                                                                                                                                                                                                                              | Bioscientia Labor Wermsdorf                                                                     | Robert Koch Institute                                                                                                   | unknown                                                                                                      |         |
| EPI_ISL_1145192                                                                                                                                                                                                                                                                | Bioscientia MVZ Labor Karlsruhe GmbH                                                            | Robert Koch Institute                                                                                                   | unknown                                                                                                      |         |
| EPI_ISL_1145206, EPI_ISL_1145207, EPI_ISL_1145208, EPI_ISL_1145209                                                                                                                                                                                                             | Uniklinikum Regensburg; Institut für Mikrobiologie                                              | Robert Koch Institute                                                                                                   | unknown                                                                                                      |         |
| EPI_ISL_1145215                                                                                                                                                                                                                                                                | Medizinisches Versorgungszentrum für Labormedizin und Mikrobiologie Ruhr GmbH - mvzlm RUHR GmbH | Robert Koch Institute                                                                                                   | unknown                                                                                                      |         |
| EPI_ISL_1145239, EPI_ISL_1145250, EPI_ISL_1145251, EPI_ISL_1145264                                                                                                                                                                                                             | MVZ Dr. Eberhard & Partner Dortmund                                                             | Robert Koch Institute                                                                                                   | unknown                                                                                                      |         |
| EPI_ISL_1145286                                                                                                                                                                                                                                                                | Universitätsklinikum Gießen - Institut für Medizinische Virologie                               | Robert Koch Institute                                                                                                   | unknown                                                                                                      |         |
| EPI_ISL_1145342, EPI_ISL_1145348, EPI_ISL_1145357, EPI_ISL_1145373, EPI_ISL_1145381, EPI_ISL_1145393, EPI_ISL_1145395, EPI_ISL_1145421, EPI_ISL_1145425                                                                                                                        | SYNLAB Jena Oncoscreen                                                                          | Robert Koch Institute                                                                                                   | unknown                                                                                                      |         |
| EPI_ISL_1145430                                                                                                                                                                                                                                                                | SYNLAB MVZ Leverkusen                                                                           | Robert Koch Institute                                                                                                   | unknown                                                                                                      |         |
| EPI_ISL_1145432                                                                                                                                                                                                                                                                | Praxisgemeinschaft für Laboratoriumsmedizin Labor Blumenstraße; Praxis Dr. Sel und Dr. Späte    | Robert Koch Institute                                                                                                   | unknown                                                                                                      |         |
| EPI_ISL_1145439                                                                                                                                                                                                                                                                | SYNLAB MVZ Leverkusen                                                                           | Robert Koch Institute                                                                                                   | unknown                                                                                                      |         |
| EPI_ISL_1145441, EPI_ISL_1145448                                                                                                                                                                                                                                               | SYNLAB Jena Oncoscreen                                                                          | Robert Koch Institute                                                                                                   | unknown                                                                                                      |         |
| EPI_ISL_1145449                                                                                                                                                                                                                                                                | SYNLAB MVZ Leverkusen                                                                           | Robert Koch Institute                                                                                                   | unknown                                                                                                      |         |
| EPI_ISL_1145450                                                                                                                                                                                                                                                                | SYNLAB Jena Oncoscreen                                                                          | Robert Koch Institute                                                                                                   | unknown                                                                                                      |         |
| EPI_ISL_1145454                                                                                                                                                                                                                                                                | Praxisgemeinschaft für Laboratoriumsmedizin Labor Blumenstraße; Praxis Dr. Sel und Dr. Späte    | Robert Koch Institute                                                                                                   | unknown                                                                                                      |         |
| EPI_ISL_1145455                                                                                                                                                                                                                                                                | SYNLAB MVZ Leverkusen                                                                           | Robert Koch Institute                                                                                                   | unknown                                                                                                      |         |

|                                                                                                                                                                                                                                                               |                                                                                                 |                       |         |
|---------------------------------------------------------------------------------------------------------------------------------------------------------------------------------------------------------------------------------------------------------------|-------------------------------------------------------------------------------------------------|-----------------------|---------|
| EPI_ISL_1145457                                                                                                                                                                                                                                               | SYNLAB Jena Oncoscreen                                                                          | Robert Koch Institute | unknown |
| EPI_ISL_1145458, EPI_ISL_1145459                                                                                                                                                                                                                              | SYNLAB MVZ Leverkusen                                                                           | Robert Koch Institute | unknown |
| EPI_ISL_1145465                                                                                                                                                                                                                                               | SYNLAB Jena Oncoscreen                                                                          | Robert Koch Institute | unknown |
| EPI_ISL_1145470, EPI_ISL_1145471, EPI_ISL_1145474                                                                                                                                                                                                             | SYNLAB MVZ Leverkusen                                                                           | Robert Koch Institute | unknown |
| EPI_ISL_1145479, EPI_ISL_1145482                                                                                                                                                                                                                              | SYNLAB Jena Oncoscreen                                                                          | Robert Koch Institute | unknown |
| EPI_ISL_1145487                                                                                                                                                                                                                                               | SYNLAB MVZ Leverkusen                                                                           | Robert Koch Institute | unknown |
| EPI_ISL_1145488                                                                                                                                                                                                                                               | SYNLAB Jena Oncoscreen                                                                          | Robert Koch Institute | unknown |
| EPI_ISL_1145490, EPI_ISL_1145491                                                                                                                                                                                                                              | SYNLAB MVZ Leverkusen                                                                           | Robert Koch Institute | unknown |
| EPI_ISL_1145493                                                                                                                                                                                                                                               | SYNLAB Jena Oncoscreen                                                                          | Robert Koch Institute | unknown |
| EPI_ISL_1145663, EPI_ISL_1145665, EPI_ISL_1145672, EPI_ISL_1145673, EPI_ISL_1145676, EPI_ISL_1145677, EPI_ISL_1145678, EPI_ISL_1145679, EPI_ISL_1145680, EPI_ISL_1145681, EPI_ISL_1145682, EPI_ISL_1145685, EPI_ISL_1145688, EPI_ISL_1145689, EPI_ISL_1145690 |                                                                                                 |                       |         |
| see above                                                                                                                                                                                                                                                     | Dianovis GmbH Greiz                                                                             | Robert Koch Institute | unknown |
| EPI_ISL_1145691                                                                                                                                                                                                                                               | amedes MVZ für Laboratoriumsmedizin Hamburg                                                     | Robert Koch Institute | unknown |
| EPI_ISL_1145936                                                                                                                                                                                                                                               | Sonic - Labor Dr. von Foreich GmbH                                                              | Robert Koch Institute | unknown |
| EPI_ISL_1145937, EPI_ISL_1145947                                                                                                                                                                                                                              | Sonic - MVZ Medizinisches Labor Bremen GmbH                                                     | Robert Koch Institute | unknown |
| EPI_ISL_1145956                                                                                                                                                                                                                                               | Bioscientia Labor Wermsdorf                                                                     | Robert Koch Institute | unknown |
| EPI_ISL_1145974                                                                                                                                                                                                                                               | Sonic - Labor Dr. von Foreich GmbH                                                              | Robert Koch Institute | unknown |
| EPI_ISL_1145984                                                                                                                                                                                                                                               | Sonic - MVZ Medizinisches Labor Bremen GmbH                                                     | Robert Koch Institute | unknown |
| EPI_ISL_1145985                                                                                                                                                                                                                                               | Sonic - Labor Dr. von Foreich GmbH                                                              | Robert Koch Institute | unknown |
| EPI_ISL_1145992                                                                                                                                                                                                                                               | Bioscientia MVZ Labor Karlsruhe GmbH                                                            | Robert Koch Institute | unknown |
| EPI_ISL_1145994                                                                                                                                                                                                                                               | LabKom - Labor Augsburg MVZ GmbH                                                                | Robert Koch Institute | unknown |
| EPI_ISL_1146006                                                                                                                                                                                                                                               | Bioscientia Labor Wermsdorf                                                                     | Robert Koch Institute | unknown |
| EPI_ISL_1146011                                                                                                                                                                                                                                               | Sonic - MVZ Medizinisches Labor Bremen GmbH                                                     | Robert Koch Institute | unknown |
| EPI_ISL_1146031, EPI_ISL_1146040                                                                                                                                                                                                                              | Bioscientia Labor Wermsdorf                                                                     | Robert Koch Institute | unknown |
| EPI_ISL_1146043                                                                                                                                                                                                                                               | Labor 28 MVZ GmbH                                                                               | Robert Koch Institute | unknown |
| EPI_ISL_1146070                                                                                                                                                                                                                                               | Bioscientia Labor Wermsdorf                                                                     | Robert Koch Institute | unknown |
| EPI_ISL_1146082                                                                                                                                                                                                                                               | Sonic - Labor Staber Dresden (Klipphausen)                                                      | Robert Koch Institute | unknown |
| EPI_ISL_1146094                                                                                                                                                                                                                                               | Sonic - MVZ Medizinisches Labor Bremen GmbH                                                     | Robert Koch Institute | unknown |
| EPI_ISL_1146101                                                                                                                                                                                                                                               | Sonic - Labor Staber Bayreuth                                                                   | Robert Koch Institute | unknown |
| EPI_ISL_1146105, EPI_ISL_1146107                                                                                                                                                                                                                              | Sonic - MVZ Medizinisches Labor Bremen GmbH                                                     | Robert Koch Institute | unknown |
| EPI_ISL_1146108                                                                                                                                                                                                                                               | Labor 28 MVZ GmbH                                                                               | Robert Koch Institute | unknown |
| EPI_ISL_1146110                                                                                                                                                                                                                                               | Sonic - Labor Dr. von Foreich GmbH                                                              | Robert Koch Institute | unknown |
| EPI_ISL_1146126                                                                                                                                                                                                                                               | Sonic - MVZ Medizinisches Labor Bremen GmbH                                                     | Robert Koch Institute | unknown |
| EPI_ISL_1146129                                                                                                                                                                                                                                               | Bioscientia Labor Wermsdorf                                                                     | Robert Koch Institute | unknown |
| EPI_ISL_1146148                                                                                                                                                                                                                                               | LabKom - Labor Augsburg MVZ GmbH                                                                | Robert Koch Institute | unknown |
| EPI_ISL_1146152                                                                                                                                                                                                                                               | Bioscientia Labor Wermsdorf                                                                     | Robert Koch Institute | unknown |
| EPI_ISL_1146155                                                                                                                                                                                                                                               | LabKom - Labor Augsburg MVZ GmbH                                                                | Robert Koch Institute | unknown |
| EPI_ISL_1146162                                                                                                                                                                                                                                               | Sonic - Labor Dr. von Foreich GmbH                                                              | Robert Koch Institute | unknown |
| EPI_ISL_1146166                                                                                                                                                                                                                                               | Sonic - Labor Staber Nürnberg                                                                   | Robert Koch Institute | unknown |
| EPI_ISL_1146171, EPI_ISL_1146173, EPI_ISL_1146175, EPI_ISL_1146177, EPI_ISL_1146182, EPI_ISL_1146183, EPI_ISL_1146190, EPI_ISL_1146196, EPI_ISL_1146204, EPI_ISL_1146211                                                                                      | amedes MVZ Hannover                                                                             | Robert Koch Institute | unknown |
| EPI_ISL_1146229, EPI_ISL_1146234                                                                                                                                                                                                                              | amedes MVZ für Laboratoriumsdiagnostik Raubling GmbH                                            | Robert Koch Institute | unknown |
| EPI_ISL_1146244, EPI_ISL_1146245, EPI_ISL_1146249, EPI_ISL_1146250                                                                                                                                                                                            | amedes MVZ Jena                                                                                 | Robert Koch Institute | unknown |
| EPI_ISL_1146254                                                                                                                                                                                                                                               | amedes MVZ für Labordiagnostik Rhein-Main                                                       | Robert Koch Institute | unknown |
| EPI_ISL_1146713                                                                                                                                                                                                                                               | Labormedizin Darmstadt                                                                          | Robert Koch Institute | unknown |
| EPI_ISL_1146718, EPI_ISL_1146721, EPI_ISL_1146726                                                                                                                                                                                                             | IMD Labor Frankfurt                                                                             | Robert Koch Institute | unknown |
| EPI_ISL_1147184, EPI_ISL_1147185, EPI_ISL_1147186, EPI_ISL_1147187, EPI_ISL_1147189, EPI_ISL_1147192, EPI_ISL_1147193, EPI_ISL_1147194, EPI_ISL_1147195, EPI_ISL_1147197                                                                                      | Universitätsklinikum Essen                                                                      | Robert Koch Institute | unknown |
| EPI_ISL_1147200, EPI_ISL_1147206, EPI_ISL_1147213                                                                                                                                                                                                             | MVZ Labor Dr. Fenner und Kollegen (Standort Hamburg)                                            | Robert Koch Institute | unknown |
| EPI_ISL_1147250                                                                                                                                                                                                                                               | Medizinisches Versorgungszentrum für Labormedizin und Mikrobiologie Ruhr GmbH - mvzIm RUHR GmbH | Robert Koch Institute | unknown |
| EPI_ISL_1147255                                                                                                                                                                                                                                               | St. Marien-Hospital Hamm                                                                        | Robert Koch Institute | unknown |
| EPI_ISL_1147256                                                                                                                                                                                                                                               | MVZ Dr. Eberhard & Partner Dortmund                                                             | Robert Koch Institute | unknown |
| EPI_ISL_1147394                                                                                                                                                                                                                                               | Labor Blackholm MVZ                                                                             | Robert Koch Institute | unknown |

|                                                                                                                                                                                                                                                                                                                                   |                                                                         |                       |         |
|-----------------------------------------------------------------------------------------------------------------------------------------------------------------------------------------------------------------------------------------------------------------------------------------------------------------------------------|-------------------------------------------------------------------------|-----------------------|---------|
| EPI_ISL_1147413                                                                                                                                                                                                                                                                                                                   | LADR MVZ Zweigpraxis Bernau                                             | Robert Koch Institute | unknown |
| EPI_ISL_1147415                                                                                                                                                                                                                                                                                                                   | IMD - Institut für Medizinische Diagnostik Berlin-Potsdam               | Robert Koch Institute | unknown |
| EPI_ISL_1147416                                                                                                                                                                                                                                                                                                                   | LADR MVZ Zweigpraxis Bernau                                             | Robert Koch Institute | unknown |
| EPI_ISL_1147418, EPI_ISL_1147419, EPI_ISL_1147420                                                                                                                                                                                                                                                                                 | IMD - Institut für Medizinische Diagnostik Berlin-Potsdam               | Robert Koch Institute | unknown |
| EPI_ISL_1147421                                                                                                                                                                                                                                                                                                                   | LADR MVZ Zweigpraxis Bernau                                             | Robert Koch Institute | unknown |
| EPI_ISL_1147422                                                                                                                                                                                                                                                                                                                   | IMD - Institut für Medizinische Diagnostik Berlin-Potsdam               | Robert Koch Institute | unknown |
| EPI_ISL_1147423, EPI_ISL_1147424, EPI_ISL_1147425, EPI_ISL_1147426, EPI_ISL_1147427, EPI_ISL_1147428                                                                                                                                                                                                                              | LADR MVZ Zweigpraxis Bernau                                             | Robert Koch Institute | unknown |
| EPI_ISL_1147429                                                                                                                                                                                                                                                                                                                   | IMD - Institut für Medizinische Diagnostik Berlin-Potsdam               | Robert Koch Institute | unknown |
| EPI_ISL_1147431, EPI_ISL_1147433, EPI_ISL_1147434, EPI_ISL_1147435                                                                                                                                                                                                                                                                | LADR MVZ Zweigpraxis Bernau                                             | Robert Koch Institute | unknown |
| EPI_ISL_1147436, EPI_ISL_1147437, EPI_ISL_1147438, EPI_ISL_1147439, EPI_ISL_1147440, EPI_ISL_1147441, EPI_ISL_1147442, EPI_ISL_1147443, EPI_ISL_1147444, EPI_ISL_1147445, EPI_ISL_1147446, EPI_ISL_1147448, EPI_ISL_1147449, EPI_ISL_1147451                                                                                      |                                                                         |                       |         |
| see above                                                                                                                                                                                                                                                                                                                         | Städtisches Klinikum Dresden                                            | Robert Koch Institute | unknown |
| EPI_ISL_1147453                                                                                                                                                                                                                                                                                                                   | IMD - MVZ Labor Greifswald                                              | Robert Koch Institute | unknown |
| EPI_ISL_1147454                                                                                                                                                                                                                                                                                                                   | IMD - Labor Oderland                                                    | Robert Koch Institute | unknown |
| EPI_ISL_1147456                                                                                                                                                                                                                                                                                                                   | IMD - MVZ Labor Greifswald                                              | Robert Koch Institute | unknown |
| EPI_ISL_1147457, EPI_ISL_1147458                                                                                                                                                                                                                                                                                                  | IMD - Labor Oderland                                                    | Robert Koch Institute | unknown |
| EPI_ISL_1147459                                                                                                                                                                                                                                                                                                                   | IMD - MVZ Labor Greifswald                                              | Robert Koch Institute | unknown |
| EPI_ISL_1147460                                                                                                                                                                                                                                                                                                                   | IMD - Labor Oderland                                                    | Robert Koch Institute | unknown |
| EPI_ISL_1147462                                                                                                                                                                                                                                                                                                                   | LADR MVZ Zweigpraxis Bernau                                             | Robert Koch Institute | unknown |
| EPI_ISL_1147463                                                                                                                                                                                                                                                                                                                   | IMD - Medizinisches Labor Rostock                                       | Robert Koch Institute | unknown |
| EPI_ISL_1147464, EPI_ISL_1147465, EPI_ISL_1147466, EPI_ISL_1147468, EPI_ISL_1147469                                                                                                                                                                                                                                               | IMD - Labor Oderland                                                    | Robert Koch Institute | unknown |
| EPI_ISL_1147470                                                                                                                                                                                                                                                                                                                   | IMD - Medizinisches Labor Rostock                                       | Robert Koch Institute | unknown |
| EPI_ISL_1147471                                                                                                                                                                                                                                                                                                                   | IMD - MVZ Labor Greifswald                                              | Robert Koch Institute | unknown |
| EPI_ISL_1147473, EPI_ISL_1147474                                                                                                                                                                                                                                                                                                  | IMD - Labor Oderland                                                    | Robert Koch Institute | unknown |
| EPI_ISL_1147476                                                                                                                                                                                                                                                                                                                   | IMD - Medizinisches Labor Rostock                                       | Robert Koch Institute | unknown |
| EPI_ISL_1147477, EPI_ISL_1147478                                                                                                                                                                                                                                                                                                  | IMD - Labor Oderland                                                    | Robert Koch Institute | unknown |
| EPI_ISL_1147479                                                                                                                                                                                                                                                                                                                   | LADR MVZ Zweigpraxis Bernau                                             | Robert Koch Institute | unknown |
| EPI_ISL_1147480                                                                                                                                                                                                                                                                                                                   | IMD - Labor Oderland                                                    | Robert Koch Institute | unknown |
| EPI_ISL_1147481                                                                                                                                                                                                                                                                                                                   | IMD - Medizinisches Labor Rostock                                       | Robert Koch Institute | unknown |
| EPI_ISL_1147482                                                                                                                                                                                                                                                                                                                   | IMD - MVZ Labor Greifswald                                              | Robert Koch Institute | unknown |
| EPI_ISL_1147483, EPI_ISL_1147484, EPI_ISL_1147485                                                                                                                                                                                                                                                                                 | IMD - Medizinisches Labor Rostock                                       | Robert Koch Institute | unknown |
| EPI_ISL_1147487                                                                                                                                                                                                                                                                                                                   | IMD - Labor Oderland                                                    | Robert Koch Institute | unknown |
| EPI_ISL_1147489                                                                                                                                                                                                                                                                                                                   | LADR MVZ Zweigpraxis Bernau                                             | Robert Koch Institute | unknown |
| EPI_ISL_1147491                                                                                                                                                                                                                                                                                                                   | IMD - Labor Oderland                                                    | Robert Koch Institute | unknown |
| EPI_ISL_1147492                                                                                                                                                                                                                                                                                                                   | IMD - MVZ Labor Greifswald                                              | Robert Koch Institute | unknown |
| EPI_ISL_1147494                                                                                                                                                                                                                                                                                                                   | IMD - Medizinisches Labor Rostock                                       | Robert Koch Institute | unknown |
| EPI_ISL_1147495, EPI_ISL_1147496                                                                                                                                                                                                                                                                                                  | IMD - Labor Oderland                                                    | Robert Koch Institute | unknown |
| EPI_ISL_1147497                                                                                                                                                                                                                                                                                                                   | IMD - MVZ Labor Greifswald                                              | Robert Koch Institute | unknown |
| EPI_ISL_1147498                                                                                                                                                                                                                                                                                                                   | LADR MVZ Zweigpraxis Bernau                                             | Robert Koch Institute | unknown |
| EPI_ISL_1147499                                                                                                                                                                                                                                                                                                                   | IMD - MVZ Labor Greifswald                                              | Robert Koch Institute | unknown |
| EPI_ISL_1147500, EPI_ISL_1147502, EPI_ISL_1147503, EPI_ISL_1147504, EPI_ISL_1147507                                                                                                                                                                                                                                               | IMD - Labor Oderland                                                    | Robert Koch Institute | unknown |
| EPI_ISL_1147508                                                                                                                                                                                                                                                                                                                   | IMD - Medizinisches Labor Rostock                                       | Robert Koch Institute | unknown |
| EPI_ISL_1147509                                                                                                                                                                                                                                                                                                                   | IMD - Labor Oderland                                                    | Robert Koch Institute | unknown |
| EPI_ISL_1147510                                                                                                                                                                                                                                                                                                                   | LADR MVZ Zweigpraxis Bernau                                             | Robert Koch Institute | unknown |
| EPI_ISL_1147511, EPI_ISL_1147513                                                                                                                                                                                                                                                                                                  | IMD - Labor Oderland                                                    | Robert Koch Institute | unknown |
| EPI_ISL_1147517                                                                                                                                                                                                                                                                                                                   | LADR MVZ Zweigpraxis Bernau                                             | Robert Koch Institute | unknown |
| EPI_ISL_1147518, EPI_ISL_1147519, EPI_ISL_1147521, EPI_ISL_1147523, EPI_ISL_1147525, EPI_ISL_1147526, EPI_ISL_1147527                                                                                                                                                                                                             | IMD - Labor Oderland                                                    | Robert Koch Institute | unknown |
| EPI_ISL_1147530, EPI_ISL_1147531, EPI_ISL_1147533, EPI_ISL_1147534, EPI_ISL_1147535, EPI_ISL_1147538, EPI_ISL_1147539, EPI_ISL_1147540, EPI_ISL_1147541, EPI_ISL_1147543, EPI_ISL_1147544, EPI_ISL_1147546, EPI_ISL_1147547, EPI_ISL_1147548, EPI_ISL_1147549, EPI_ISL_1147550, EPI_ISL_1147551, EPI_ISL_1147552, EPI_ISL_1147554 |                                                                         |                       |         |
| see above                                                                                                                                                                                                                                                                                                                         | Uniklinikum Carl Gustav Carus an der TU Dresden; Institut für Virologie | Robert Koch Institute | unknown |
| EPI_ISL_1147556                                                                                                                                                                                                                                                                                                                   | LABOR CHEMNITZ - Zentrum für Diagnostik am Klinikum Chemnitz            | Robert Koch Institute | unknown |

|                                                                                                                                                                                                                                                                                                                                                                                                                                                                                                                                                                   |                                                                                                    |                       |         |
|-------------------------------------------------------------------------------------------------------------------------------------------------------------------------------------------------------------------------------------------------------------------------------------------------------------------------------------------------------------------------------------------------------------------------------------------------------------------------------------------------------------------------------------------------------------------|----------------------------------------------------------------------------------------------------|-----------------------|---------|
| EPI_ISL_1147558, EPI_ISL_1147559,<br>EPI_ISL_1147560, EPI_ISL_1147562,<br>EPI_ISL_1147564                                                                                                                                                                                                                                                                                                                                                                                                                                                                         | Uniklinikum Carl Gustav Carus an der TU Dresden; Institut für<br>Virologie                         | Robert Koch Institute | unknown |
| EPI_ISL_1147610, EPI_ISL_1147611, EPI_ISL_1147612, EPI_ISL_1147614, EPI_ISL_1147615, EPI_ISL_1147616, EPI_ISL_1147617, EPI_ISL_1147618, EPI_ISL_1147621, EPI_ISL_1147622, EPI_ISL_1147623, EPI_ISL_1147624, EPI_ISL_1147626, EPI_ISL_1147627, EPI_ISL_1147629, EPI_ISL_1147630, EPI_ISL_1147631,<br>EPI_ISL_1147632, EPI_ISL_1147633, EPI_ISL_1147634, EPI_ISL_1147635, EPI_ISL_1147638, EPI_ISL_1147639, EPI_ISL_1147641, EPI_ISL_1147642, EPI_ISL_1147644, EPI_ISL_1147645, EPI_ISL_1147647, EPI_ISL_1147648, EPI_ISL_1147649, EPI_ISL_1147651, EPI_ISL_1147652 |                                                                                                    |                       |         |
| see above                                                                                                                                                                                                                                                                                                                                                                                                                                                                                                                                                         | Med. Labor Prof. Schenk Dr. Ansorge & Kollegen                                                     | Robert Koch Institute | unknown |
| EPI_ISL_1147659, EPI_ISL_1147664                                                                                                                                                                                                                                                                                                                                                                                                                                                                                                                                  | Uniklinikum Jena                                                                                   | Robert Koch Institute | unknown |
| EPI_ISL_1147670, EPI_ISL_1147671,<br>EPI_ISL_1147672, EPI_ISL_1147674,<br>EPI_ISL_1147675, EPI_ISL_1147676,<br>EPI_ISL_1147678                                                                                                                                                                                                                                                                                                                                                                                                                                    | amedes MVZ für Laboratoriumsdiagnostik Raubling GmbH                                               | Robert Koch Institute | unknown |
| EPI_ISL_1147680                                                                                                                                                                                                                                                                                                                                                                                                                                                                                                                                                   | amedes MVZ für Laboratoriumsmedizin Rhein/Ruhr                                                     | Robert Koch Institute | unknown |
| EPI_ISL_1147705, EPI_ISL_1147714                                                                                                                                                                                                                                                                                                                                                                                                                                                                                                                                  | amedes MVZ DIAMEDIS Sennestadt                                                                     | Robert Koch Institute | unknown |
| EPI_ISL_1147726, EPI_ISL_1147728, EPI_ISL_1147732, EPI_ISL_1147737, EPI_ISL_1147738, EPI_ISL_1147740, EPI_ISL_1147743, EPI_ISL_1147745, EPI_ISL_1147747, EPI_ISL_1147748, EPI_ISL_1147751, EPI_ISL_1147752, EPI_ISL_1147753, EPI_ISL_1147756, EPI_ISL_1147759                                                                                                                                                                                                                                                                                                     |                                                                                                    |                       |         |
| see above                                                                                                                                                                                                                                                                                                                                                                                                                                                                                                                                                         | Dianovis GmbH Greiz                                                                                | Robert Koch Institute | unknown |
| EPI_ISL_1147981, EPI_ISL_1147982,<br>EPI_ISL_1147984, EPI_ISL_1147987                                                                                                                                                                                                                                                                                                                                                                                                                                                                                             | IMD Labor Frankfurt                                                                                | Robert Koch Institute | unknown |
| EPI_ISL_1147993, EPI_ISL_1147994,<br>EPI_ISL_1148002, EPI_ISL_1148008,<br>EPI_ISL_1148009, EPI_ISL_1148011,<br>EPI_ISL_1148013, EPI_ISL_1148020,<br>EPI_ISL_1148028, EPI_ISL_1148036                                                                                                                                                                                                                                                                                                                                                                              | MVZ Dr. Eberhard & Partner Dortmund                                                                | Robert Koch Institute | unknown |
| EPI_ISL_1148063                                                                                                                                                                                                                                                                                                                                                                                                                                                                                                                                                   | MVZ für Laboratoriumsmedizin und Mikrobiologie Würzburg                                            | Robert Koch Institute | unknown |
| EPI_ISL_1148064                                                                                                                                                                                                                                                                                                                                                                                                                                                                                                                                                   | Medizinisches Versorgungszentrum für Labormedizin und<br>Mikrobiologie Ruhr GmbH - mvzlm RUHR GmbH | Robert Koch Institute | unknown |
| EPI_ISL_1148069                                                                                                                                                                                                                                                                                                                                                                                                                                                                                                                                                   | MVZ für Laboratoriumsmedizin und Mikrobiologie Würzburg                                            | Robert Koch Institute | unknown |
| EPI_ISL_1148144                                                                                                                                                                                                                                                                                                                                                                                                                                                                                                                                                   | Bayerisches Landesamt für Gesundheit und<br>Lebensmittelsicherheit (LGL)                           | Robert Koch Institute | unknown |
| EPI_ISL_1148195, EPI_ISL_1148198                                                                                                                                                                                                                                                                                                                                                                                                                                                                                                                                  | Sonic - Labor Dr. von Foreich GmbH                                                                 | Robert Koch Institute | unknown |
| EPI_ISL_1148208                                                                                                                                                                                                                                                                                                                                                                                                                                                                                                                                                   | Bioscientia Labor Wermsdorf                                                                        | Robert Koch Institute | unknown |
| EPI_ISL_1148222                                                                                                                                                                                                                                                                                                                                                                                                                                                                                                                                                   | Bioscientia MVZ Labor Karlsruhe GmbH                                                               | Robert Koch Institute | unknown |
| EPI_ISL_1148241                                                                                                                                                                                                                                                                                                                                                                                                                                                                                                                                                   | Sonic - Labor Staber MVZ Kassel                                                                    | Robert Koch Institute | unknown |
| EPI_ISL_1148245                                                                                                                                                                                                                                                                                                                                                                                                                                                                                                                                                   | Bioscientia MVZ Labor Karlsruhe GmbH                                                               | Robert Koch Institute | unknown |
| EPI_ISL_1148246                                                                                                                                                                                                                                                                                                                                                                                                                                                                                                                                                   | Sonic - Labor Dr. von Foreich GmbH                                                                 | Robert Koch Institute | unknown |
| EPI_ISL_1148251, EPI_ISL_1148263                                                                                                                                                                                                                                                                                                                                                                                                                                                                                                                                  | Sonic - Labor Staber Dresden (Klipphausen)                                                         | Robert Koch Institute | unknown |
| EPI_ISL_1148277                                                                                                                                                                                                                                                                                                                                                                                                                                                                                                                                                   | Sonic - Labor Staber Bayreuth                                                                      | Robert Koch Institute | unknown |
| EPI_ISL_1148281, EPI_ISL_1148302                                                                                                                                                                                                                                                                                                                                                                                                                                                                                                                                  | Bioscientia Labor Wermsdorf                                                                        | Robert Koch Institute | unknown |
| EPI_ISL_1148312, EPI_ISL_1148322                                                                                                                                                                                                                                                                                                                                                                                                                                                                                                                                  | Sonic - Labor Dr. von Foreich GmbH                                                                 | Robert Koch Institute | unknown |
| EPI_ISL_1148326                                                                                                                                                                                                                                                                                                                                                                                                                                                                                                                                                   | Bioscientia Labor Wermsdorf                                                                        | Robert Koch Institute | unknown |
| EPI_ISL_1148346                                                                                                                                                                                                                                                                                                                                                                                                                                                                                                                                                   | Sonic - Labor Staber Dresden (Klipphausen)                                                         | Robert Koch Institute | unknown |
| EPI_ISL_1148350                                                                                                                                                                                                                                                                                                                                                                                                                                                                                                                                                   | Sonic - Labor Staber Heilbronn                                                                     | Robert Koch Institute | unknown |
| EPI_ISL_1148351                                                                                                                                                                                                                                                                                                                                                                                                                                                                                                                                                   | Bioscientia Labor Wermsdorf                                                                        | Robert Koch Institute | unknown |
| EPI_ISL_1148352                                                                                                                                                                                                                                                                                                                                                                                                                                                                                                                                                   | Sonic - Labor Dr. von Foreich GmbH                                                                 | Robert Koch Institute | unknown |
| EPI_ISL_1148368, EPI_ISL_1148380                                                                                                                                                                                                                                                                                                                                                                                                                                                                                                                                  | Bioscientia Labor Wermsdorf                                                                        | Robert Koch Institute | unknown |
| EPI_ISL_1148381                                                                                                                                                                                                                                                                                                                                                                                                                                                                                                                                                   | Sonic - Labor Staber Dresden (Klipphausen)                                                         | Robert Koch Institute | unknown |
| EPI_ISL_1148382, EPI_ISL_1148399                                                                                                                                                                                                                                                                                                                                                                                                                                                                                                                                  | Bioscientia Labor Wermsdorf                                                                        | Robert Koch Institute | unknown |
| EPI_ISL_1148418                                                                                                                                                                                                                                                                                                                                                                                                                                                                                                                                                   | Sonic - Labor Dr. von Foreich GmbH                                                                 | Robert Koch Institute | unknown |
| EPI_ISL_1148420                                                                                                                                                                                                                                                                                                                                                                                                                                                                                                                                                   | Sonic - Dr. Staber & Kollegen GmbH München                                                         | Robert Koch Institute | unknown |
| EPI_ISL_1148422                                                                                                                                                                                                                                                                                                                                                                                                                                                                                                                                                   | Universitätsklinikum Frankfurt - Institut für Medizinische<br>Virologie                            | Robert Koch Institute | unknown |
| EPI_ISL_1148440                                                                                                                                                                                                                                                                                                                                                                                                                                                                                                                                                   | Sonic - MVZ Medizinisches Labor Bremen GmbH                                                        | Robert Koch Institute | unknown |
| EPI_ISL_1148446                                                                                                                                                                                                                                                                                                                                                                                                                                                                                                                                                   | Sonic - Dr. Staber & Kollegen GmbH München                                                         | Robert Koch Institute | unknown |
| EPI_ISL_1148460, EPI_ISL_1148461,<br>EPI_ISL_1148463, EPI_ISL_1148465,<br>EPI_ISL_1148466                                                                                                                                                                                                                                                                                                                                                                                                                                                                         | Uniklinikum Regensburg; Institut für Mikrobiologie                                                 | Robert Koch Institute | unknown |
| EPI_ISL_1148477                                                                                                                                                                                                                                                                                                                                                                                                                                                                                                                                                   | IMD Labor Frankfurt                                                                                | Robert Koch Institute | unknown |
| EPI_ISL_1148485                                                                                                                                                                                                                                                                                                                                                                                                                                                                                                                                                   | Klinikum der Stadt Ludwigshafen - Institut für Labordiagnostik<br>Hygiene und Transfusionsmedizin  | Robert Koch Institute | unknown |
| EPI_ISL_1148488, EPI_ISL_1148489,<br>EPI_ISL_1148490                                                                                                                                                                                                                                                                                                                                                                                                                                                                                                              | IMD Labor Frankfurt                                                                                | Robert Koch Institute | unknown |
| EPI_ISL_1148498                                                                                                                                                                                                                                                                                                                                                                                                                                                                                                                                                   | Labormedizin Darmstadt                                                                             | Robert Koch Institute | unknown |
| EPI_ISL_1148517                                                                                                                                                                                                                                                                                                                                                                                                                                                                                                                                                   | MVZ Labor Dr. Fenner und Kollegen (Standort Hamburg)                                               | Robert Koch Institute | unknown |
| EPI_ISL_1148737                                                                                                                                                                                                                                                                                                                                                                                                                                                                                                                                                   | SYNLAB MVZ Trier                                                                                   | Robert Koch Institute | unknown |
| EPI_ISL_1148742                                                                                                                                                                                                                                                                                                                                                                                                                                                                                                                                                   | SYNLAB MVZ Leverkusen                                                                              | Robert Koch Institute | unknown |

|                                                                                                                       |                                                                                              |                       |         |
|-----------------------------------------------------------------------------------------------------------------------|----------------------------------------------------------------------------------------------|-----------------------|---------|
| EPI_ISL_1148749                                                                                                       | SYNLAB MVZ Weiden                                                                            | Robert Koch Institute | unknown |
| EPI_ISL_1148771                                                                                                       | SYNLAB MVZ Ettlingen                                                                         | Robert Koch Institute | unknown |
| EPI_ISL_1148785                                                                                                       | SYNLAB MVZ Leverkusen                                                                        | Robert Koch Institute | unknown |
| EPI_ISL_1148790                                                                                                       | SYNLAB MVZ Trier                                                                             | Robert Koch Institute | unknown |
| EPI_ISL_1148803                                                                                                       | SYNLAB MVZ Weiden                                                                            | Robert Koch Institute | unknown |
| EPI_ISL_1148811                                                                                                       | SYNLAB MVZ Hamburg                                                                           | Robert Koch Institute | unknown |
| EPI_ISL_1148814                                                                                                       | SYNLAB MVZ Leverkusen                                                                        | Robert Koch Institute | unknown |
| EPI_ISL_1148816, EPI_ISL_1148820                                                                                      | SYNLAB MVZ Weiden                                                                            | Robert Koch Institute | unknown |
| EPI_ISL_1148827                                                                                                       | SYNLAB Jena Oncoscreen                                                                       | Robert Koch Institute | unknown |
| EPI_ISL_1148836                                                                                                       | SYNLAB MVZ Ettlingen                                                                         | Robert Koch Institute | unknown |
| EPI_ISL_1148844                                                                                                       | Medizinisches Zentrallabor Altenburg GmbH & Co.KG                                            | Robert Koch Institute | unknown |
| EPI_ISL_1148848, EPI_ISL_1148864, EPI_ISL_1148868                                                                     | SYNLAB MVZ Leverkusen                                                                        | Robert Koch Institute | unknown |
| EPI_ISL_1148881                                                                                                       | SYNLAB Jena Oncoscreen                                                                       | Robert Koch Institute | unknown |
| EPI_ISL_1148883                                                                                                       | SYNLAB MVZ Leverkusen                                                                        | Robert Koch Institute | unknown |
| EPI_ISL_1148922                                                                                                       | SYNLAB Jena Oncoscreen                                                                       | Robert Koch Institute | unknown |
| EPI_ISL_1148928                                                                                                       | SYNLAB MVZ Ettlingen                                                                         | Robert Koch Institute | unknown |
| EPI_ISL_1148946                                                                                                       | SYNLAB MVZ Leverkusen                                                                        | Robert Koch Institute | unknown |
| EPI_ISL_1148954                                                                                                       | Medizinisches Zentrallabor Altenburg GmbH & Co.KG                                            | Robert Koch Institute | unknown |
| EPI_ISL_1148964, EPI_ISL_1148967, EPI_ISL_1148970                                                                     | SYNLAB MVZ Leverkusen                                                                        | Robert Koch Institute | unknown |
| EPI_ISL_1148971                                                                                                       | SYNLAB MVZ Trier                                                                             | Robert Koch Institute | unknown |
| EPI_ISL_1148976                                                                                                       | SYNLAB MVZ Hamburg                                                                           | Robert Koch Institute | unknown |
| EPI_ISL_1149000                                                                                                       | SYNLAB MVZ Leverkusen                                                                        | Robert Koch Institute | unknown |
| EPI_ISL_1149007                                                                                                       | SYNLAB MVZ Ettlingen                                                                         | Robert Koch Institute | unknown |
| EPI_ISL_1149014                                                                                                       | Medizinisches Zentrallabor Altenburg GmbH & Co.KG                                            | Robert Koch Institute | unknown |
| EPI_ISL_1149022, EPI_ISL_1149025                                                                                      | SYNLAB MVZ Leverkusen                                                                        | Robert Koch Institute | unknown |
| EPI_ISL_1149038                                                                                                       | Praxisgemeinschaft für Laboratoriumsmedizin Labor Blumenstraße; Praxis Dr. Sel und Dr. Späte | Robert Koch Institute | unknown |
| EPI_ISL_1149041                                                                                                       | SYNLAB MVZ Weiden                                                                            | Robert Koch Institute | unknown |
| EPI_ISL_1149045, EPI_ISL_1149049                                                                                      | SYNLAB MVZ Leverkusen                                                                        | Robert Koch Institute | unknown |
| EPI_ISL_1149055                                                                                                       | SYNLAB MVZ Trier                                                                             | Robert Koch Institute | unknown |
| EPI_ISL_1149066                                                                                                       | SYNLAB MVZ Leverkusen                                                                        | Robert Koch Institute | unknown |
| EPI_ISL_1149069                                                                                                       | SYNLAB MVZ Weiden                                                                            | Robert Koch Institute | unknown |
| EPI_ISL_1149089, EPI_ISL_1149116, EPI_ISL_1149132, EPI_ISL_1149229, EPI_ISL_1149255                                   | Diagnosticum - Labor Neukirchen                                                              | Robert Koch Institute | unknown |
| EPI_ISL_1149311, EPI_ISL_1149313, EPI_ISL_1149314, EPI_ISL_1149316, EPI_ISL_1149320, EPI_ISL_1149321, EPI_ISL_1149323 | Universitätsklinikum Essen                                                                   | Robert Koch Institute | unknown |
| EPI_ISL_1149327                                                                                                       | amedes MVZ DIAMEDIS Sennestadt                                                               | Robert Koch Institute | unknown |
| EPI_ISL_1149340                                                                                                       | amedes MVZ Halle/Leipzig                                                                     | Robert Koch Institute | unknown |
| EPI_ISL_1149345                                                                                                       | amedes MVZ Hannover                                                                          | Robert Koch Institute | unknown |
| EPI_ISL_1149351, EPI_ISL_1149369, EPI_ISL_1149373                                                                     | amedes MVZ Jena                                                                              | Robert Koch Institute | unknown |
| EPI_ISL_1149390                                                                                                       | amedes MVZ DIAMEDIS Sennestadt                                                               | Robert Koch Institute | unknown |
| EPI_ISL_1149391, EPI_ISL_1149404                                                                                      | amedes MVZ Jena                                                                              | Robert Koch Institute | unknown |
| EPI_ISL_1149415                                                                                                       | amedes Göttingen                                                                             | Robert Koch Institute | unknown |
| EPI_ISL_1149432                                                                                                       | amedes MVZ Jena                                                                              | Robert Koch Institute | unknown |
| EPI_ISL_1149477                                                                                                       | amedes MVZ für Labordiagnostik Rhein-Main                                                    | Robert Koch Institute | unknown |
| EPI_ISL_1149496, EPI_ISL_1149502                                                                                      | amedes MVZ Hannover                                                                          | Robert Koch Institute | unknown |
| EPI_ISL_1150023                                                                                                       | Bioscientia Labor Wermsdorf                                                                  | Robert Koch Institute | unknown |
| EPI_ISL_1150026                                                                                                       | Sonic - Labor Dr. von Foreich GmbH                                                           | Robert Koch Institute | unknown |
| EPI_ISL_1150030, EPI_ISL_1150034                                                                                      | Bioscientia Labor Wermsdorf                                                                  | Robert Koch Institute | unknown |
| EPI_ISL_1150047                                                                                                       | Sonic - Labor Dr. von Foreich GmbH                                                           | Robert Koch Institute | unknown |
| EPI_ISL_1150050, EPI_ISL_1150053, EPI_ISL_1150055, EPI_ISL_1150060                                                    | Bioscientia Labor Wermsdorf                                                                  | Robert Koch Institute | unknown |
| EPI_ISL_1150061                                                                                                       | Sonic - Labor Dr. von Foreich GmbH                                                           | Robert Koch Institute | unknown |
| EPI_ISL_1150063                                                                                                       | LabKom - Labor Augsburg MVZ GmbH                                                             | Robert Koch Institute | unknown |
| EPI_ISL_1150065                                                                                                       | LabKom - MVZ Labor Bochum MLB GmbH                                                           | Robert Koch Institute | unknown |
| EPI_ISL_1150066                                                                                                       | Sonic - Labor Dr. von Foreich GmbH                                                           | Robert Koch Institute | unknown |

|                                                                                                                                                                                                                             |                                                    |                       |         |
|-----------------------------------------------------------------------------------------------------------------------------------------------------------------------------------------------------------------------------|----------------------------------------------------|-----------------------|---------|
| EPI_ISL_1150069                                                                                                                                                                                                             | Sonic - MVZ Medizinisches Labor Bremen GmbH        | Robert Koch Institute | unknown |
| EPI_ISL_1150071, EPI_ISL_1150074,<br>EPI_ISL_1150093, EPI_ISL_1150103,<br>EPI_ISL_1150104, EPI_ISL_1150111,<br>EPI_ISL_1150115, EPI_ISL_1150123,<br>EPI_ISL_1150127                                                         | Bioscientia Labor Wermsdorf                        | Robert Koch Institute | unknown |
| EPI_ISL_1150131                                                                                                                                                                                                             | LabKom - Labor Augsburg MVZ GmbH                   | Robert Koch Institute | unknown |
| EPI_ISL_1150132                                                                                                                                                                                                             | Bioscientia Labor Wermsdorf                        | Robert Koch Institute | unknown |
| EPI_ISL_1150139                                                                                                                                                                                                             | LabKom - Labor Augsburg MVZ GmbH                   | Robert Koch Institute | unknown |
| EPI_ISL_1150141                                                                                                                                                                                                             | LabKom - Labor an der Salzbrücke MVZ GmbH          | Robert Koch Institute | unknown |
| EPI_ISL_1150157, EPI_ISL_1150166                                                                                                                                                                                            | Bioscientia Labor Wermsdorf                        | Robert Koch Institute | unknown |
| EPI_ISL_1150178                                                                                                                                                                                                             | LabKom - Labor an der Salzbrücke MVZ GmbH          | Robert Koch Institute | unknown |
| EPI_ISL_1150197                                                                                                                                                                                                             | Sonic - MVZ Medizinisches Labor Bremen GmbH        | Robert Koch Institute | unknown |
| EPI_ISL_1150214                                                                                                                                                                                                             | Bioscientia Labor Wermsdorf                        | Robert Koch Institute | unknown |
| EPI_ISL_1150221, EPI_ISL_1150223                                                                                                                                                                                            | Sonic - Labor Dr. von Foreich GmbH                 | Robert Koch Institute | unknown |
| EPI_ISL_1150224                                                                                                                                                                                                             | LabKom - Labor an der Salzbrücke MVZ GmbH          | Robert Koch Institute | unknown |
| EPI_ISL_1150227                                                                                                                                                                                                             | LabKom - Labor Augsburg MVZ GmbH                   | Robert Koch Institute | unknown |
| EPI_ISL_1150241                                                                                                                                                                                                             | Bioscientia Labor Wermsdorf                        | Robert Koch Institute | unknown |
| EPI_ISL_1150255                                                                                                                                                                                                             | LabKom - Labor Augsburg MVZ GmbH                   | Robert Koch Institute | unknown |
| EPI_ISL_1150257                                                                                                                                                                                                             | Sonic - Labor Dr. von Foreich GmbH                 | Robert Koch Institute | unknown |
| EPI_ISL_1150261                                                                                                                                                                                                             | Bioscientia Labor Wermsdorf                        | Robert Koch Institute | unknown |
| EPI_ISL_1150264                                                                                                                                                                                                             | St. Georg Klinikum Eisenach gGmbH                  | Robert Koch Institute | unknown |
| EPI_ISL_1150267                                                                                                                                                                                                             | Sonic - Labor Dr. von Foreich GmbH                 | Robert Koch Institute | unknown |
| EPI_ISL_1150269, EPI_ISL_1150278                                                                                                                                                                                            | Bioscientia Labor Wermsdorf                        | Robert Koch Institute | unknown |
| EPI_ISL_1150282                                                                                                                                                                                                             | LabKom - MVZ Labor Bochum MLB GmbH                 | Robert Koch Institute | unknown |
| EPI_ISL_1150286, EPI_ISL_1150292                                                                                                                                                                                            | Bioscientia Labor Wermsdorf                        | Robert Koch Institute | unknown |
| EPI_ISL_1150294                                                                                                                                                                                                             | Sonic - Labor Dr. von Foreich GmbH                 | Robert Koch Institute | unknown |
| EPI_ISL_1150307, EPI_ISL_1150310                                                                                                                                                                                            | Bioscientia Labor Wermsdorf                        | Robert Koch Institute | unknown |
| EPI_ISL_1150316                                                                                                                                                                                                             | LabKom - Labor an der Salzbrücke MVZ GmbH          | Robert Koch Institute | unknown |
| EPI_ISL_1150318, EPI_ISL_1150333,<br>EPI_ISL_1150336, EPI_ISL_1150340                                                                                                                                                       | Bioscientia Labor Wermsdorf                        | Robert Koch Institute | unknown |
| EPI_ISL_1150350                                                                                                                                                                                                             | Sonic - Labor Dr. von Foreich GmbH                 | Robert Koch Institute | unknown |
| EPI_ISL_1150366                                                                                                                                                                                                             | Bioscientia Labor Wermsdorf                        | Robert Koch Institute | unknown |
| EPI_ISL_1150368                                                                                                                                                                                                             | LabKom - Labor an der Salzbrücke MVZ GmbH          | Robert Koch Institute | unknown |
| EPI_ISL_1150376                                                                                                                                                                                                             | LabKom - Labor Augsburg MVZ GmbH                   | Robert Koch Institute | unknown |
| EPI_ISL_1150380                                                                                                                                                                                                             | Bioscientia Labor Wermsdorf                        | Robert Koch Institute | unknown |
| EPI_ISL_1150460                                                                                                                                                                                                             | MVZ Dr. Eberhard & Partner Dortmund                | Robert Koch Institute | unknown |
| EPI_ISL_1150464, EPI_ISL_1150465,<br>EPI_ISL_1150468                                                                                                                                                                        | Labor Dr. Heidrich & Kollegen MVZ GmbH Hamburg     | Robert Koch Institute | unknown |
| EPI_ISL_1150470, EPI_ISL_1150472,<br>EPI_ISL_1150473                                                                                                                                                                        | Medizinisch-Diagnostisches Labor Kempten allgäulab | Robert Koch Institute | unknown |
| EPI_ISL_1150475, EPI_ISL_1150476                                                                                                                                                                                            | Labor Dr. Heidrich & Kollegen MVZ GmbH Hamburg     | Robert Koch Institute | unknown |
| EPI_ISL_1150478, EPI_ISL_1150481                                                                                                                                                                                            | Medizinisch-Diagnostisches Labor Kempten allgäulab | Robert Koch Institute | unknown |
| EPI_ISL_1150486, EPI_ISL_1150493, EPI_ISL_1150494, EPI_ISL_1150498, EPI_ISL_1150499, EPI_ISL_1150501, EPI_ISL_1150509, EPI_ISL_1150510, EPI_ISL_1150511, EPI_ISL_1150518, EPI_ISL_1150522, EPI_ISL_1150524, EPI_ISL_1150525 |                                                    |                       |         |
| see above                                                                                                                                                                                                                   | Med. Labor Prof. Schenk Dr. Ansorge & Kollegen     | Robert Koch Institute | unknown |
| EPI_ISL_1150532, EPI_ISL_1150589                                                                                                                                                                                            | Diagnosticum - Labor Neukirchen                    | Robert Koch Institute | unknown |
| EPI_ISL_1150703                                                                                                                                                                                                             | SYNLAB MVZ Heidelberg                              | Robert Koch Institute | unknown |
| EPI_ISL_1150710                                                                                                                                                                                                             | SYNLAB MVZ Trier                                   | Robert Koch Institute | unknown |
| EPI_ISL_1150713, EPI_ISL_1150721,<br>EPI_ISL_1150736, EPI_ISL_1150737,<br>EPI_ISL_1150740                                                                                                                                   | SYNLAB MVZ Weiden                                  | Robert Koch Institute | unknown |
| EPI_ISL_1150769                                                                                                                                                                                                             | SYNLAB MVZ Heidelberg                              | Robert Koch Institute | unknown |
| EPI_ISL_1150777                                                                                                                                                                                                             | SYNLAB MVZ Weiden                                  | Robert Koch Institute | unknown |
| EPI_ISL_1150783                                                                                                                                                                                                             | SYNLAB MVZ Leinfelden-Echterdingen                 | Robert Koch Institute | unknown |
| EPI_ISL_1150791, EPI_ISL_1150793                                                                                                                                                                                            | SYNLAB MVZ Weiden                                  | Robert Koch Institute | unknown |
| EPI_ISL_1150795                                                                                                                                                                                                             | SYNLAB Labor München Zentrum LMZ                   | Robert Koch Institute | unknown |
| EPI_ISL_1150799                                                                                                                                                                                                             | SYNLAB MVZ Weiden                                  | Robert Koch Institute | unknown |
| EPI_ISL_1150806                                                                                                                                                                                                             | SYNLAB MVZ Leinfelden-Echterdingen                 | Robert Koch Institute | unknown |
| EPI_ISL_1150820, EPI_ISL_1150826,<br>EPI_ISL_1150845                                                                                                                                                                        | SYNLAB MVZ Weiden                                  | Robert Koch Institute | unknown |
| EPI_ISL_1150857                                                                                                                                                                                                             | SYNLAB MVZ Leinfelden-Echterdingen                 | Robert Koch Institute | unknown |
| EPI_ISL_1150900                                                                                                                                                                                                             | SYNLAB MVZ Weiden                                  | Robert Koch Institute | unknown |



|                                                                                                                                                 |                                                                                                               |                       |         |
|-------------------------------------------------------------------------------------------------------------------------------------------------|---------------------------------------------------------------------------------------------------------------|-----------------------|---------|
| EPI_ISL_1150902                                                                                                                                 | SYNLAB MVZ Trier                                                                                              | Robert Koch Institute | unknown |
| EPI_ISL_1150919                                                                                                                                 | SYNLAB MVZ Weiden                                                                                             | Robert Koch Institute | unknown |
| EPI_ISL_1150929                                                                                                                                 | SYNLAB MVZ Berlin                                                                                             | Robert Koch Institute | unknown |
| EPI_ISL_1150940, EPI_ISL_1150943,<br>EPI_ISL_1150944, EPI_ISL_1150970,<br>EPI_ISL_1151014                                                       | SYNLAB MVZ Weiden                                                                                             | Robert Koch Institute | unknown |
| EPI_ISL_1151023                                                                                                                                 | SYNLAB MVZ Leinfelden-Echterdingen                                                                            | Robert Koch Institute | unknown |
| EPI_ISL_1151031, EPI_ISL_1151038                                                                                                                | SYNLAB MVZ Weiden                                                                                             | Robert Koch Institute | unknown |
| EPI_ISL_1151043                                                                                                                                 | Synlab MVZ Augsburg                                                                                           | Robert Koch Institute | unknown |
| EPI_ISL_1151052                                                                                                                                 | SYNLAB MVZ Weiden                                                                                             | Robert Koch Institute | unknown |
| EPI_ISL_1151058                                                                                                                                 | SYNLAB MVZ Trier                                                                                              | Robert Koch Institute | unknown |
| EPI_ISL_1151077, EPI_ISL_1151079                                                                                                                | SYNLAB MVZ Weiden                                                                                             | Robert Koch Institute | unknown |
| EPI_ISL_1151111, EPI_ISL_1151117                                                                                                                | SYNLAB MVZ Trier                                                                                              | Robert Koch Institute | unknown |
| EPI_ISL_1151125, EPI_ISL_1151132                                                                                                                | SYNLAB MVZ Weiden                                                                                             | Robert Koch Institute | unknown |
| EPI_ISL_1151143                                                                                                                                 | SYNLAB MVZ Trier                                                                                              | Robert Koch Institute | unknown |
| EPI_ISL_1151160, EPI_ISL_1151181,<br>EPI_ISL_1151232, EPI_ISL_1151236,<br>EPI_ISL_1151243, EPI_ISL_1151266,<br>EPI_ISL_1151267, EPI_ISL_1151268 | SYNLAB MVZ Weiden                                                                                             | Robert Koch Institute | unknown |
| EPI_ISL_1151280                                                                                                                                 | SYNLAB MVZ Leinfelden-Echterdingen                                                                            | Robert Koch Institute | unknown |
| EPI_ISL_1151285                                                                                                                                 | SYNLAB MVZ Weiden                                                                                             | Robert Koch Institute | unknown |
| EPI_ISL_1151303                                                                                                                                 | SYNLAB MVZ Trier                                                                                              | Robert Koch Institute | unknown |
| EPI_ISL_1151305, EPI_ISL_1151308,<br>EPI_ISL_1151314, EPI_ISL_1151339,<br>EPI_ISL_1151352                                                       | SYNLAB MVZ Weiden                                                                                             | Robert Koch Institute | unknown |
| EPI_ISL_1151358                                                                                                                                 | SYNLAB MVZ Trier                                                                                              | Robert Koch Institute | unknown |
| EPI_ISL_1151372, EPI_ISL_1151392                                                                                                                | SYNLAB MVZ Weiden                                                                                             | Robert Koch Institute | unknown |
| EPI_ISL_1151400, EPI_ISL_1151401,<br>EPI_ISL_1151406, EPI_ISL_1151408                                                                           | Thüringer Landesamtes für Verbraucherschutz                                                                   | Robert Koch Institute | unknown |
| EPI_ISL_1151415                                                                                                                                 | Labor Dr. Schumacher MVZ                                                                                      | Robert Koch Institute | unknown |
| EPI_ISL_1151417                                                                                                                                 | SYNLAB MVZ Weiden                                                                                             | Robert Koch Institute | unknown |
| EPI_ISL_1151423, EPI_ISL_1151428                                                                                                                | SYNLAB Jena Oncoscreen                                                                                        | Robert Koch Institute | unknown |
| EPI_ISL_1151429                                                                                                                                 | Labor Dr. Schumacher MVZ                                                                                      | Robert Koch Institute | unknown |
| EPI_ISL_1151430                                                                                                                                 | Labor für medizinische Mikrobiologie Bakteriologie Mykologie<br>Virologie & Infektionsserologie               | Robert Koch Institute | unknown |
| EPI_ISL_1151436                                                                                                                                 | Synlab MVZ Augsburg                                                                                           | Robert Koch Institute | unknown |
| EPI_ISL_1151442, EPI_ISL_1151445                                                                                                                | SYNLAB MVZ Weiden                                                                                             | Robert Koch Institute | unknown |
| EPI_ISL_1151447                                                                                                                                 | SYNLAB Jena Oncoscreen                                                                                        | Robert Koch Institute | unknown |
| EPI_ISL_1151454                                                                                                                                 | SYNLAB MVZ Weiden                                                                                             | Robert Koch Institute | unknown |
| EPI_ISL_1151462                                                                                                                                 | Synlab MVZ Augsburg                                                                                           | Robert Koch Institute | unknown |
| EPI_ISL_1151465                                                                                                                                 | SYNLAB MVZ Weiden                                                                                             | Robert Koch Institute | unknown |
| EPI_ISL_1151469                                                                                                                                 | Labor Dr. Schumacher MVZ                                                                                      | Robert Koch Institute | unknown |
| EPI_ISL_1151471, EPI_ISL_1151473                                                                                                                | SYNLAB MVZ Weiden                                                                                             | Robert Koch Institute | unknown |
| EPI_ISL_1151474                                                                                                                                 | SYNLAB Jena Oncoscreen                                                                                        | Robert Koch Institute | unknown |
| EPI_ISL_1151487, EPI_ISL_1151500                                                                                                                | SYNLAB MVZ Weiden                                                                                             | Robert Koch Institute | unknown |
| EPI_ISL_1151513                                                                                                                                 | Synlab MVZ Augsburg                                                                                           | Robert Koch Institute | unknown |
| EPI_ISL_1151515                                                                                                                                 | SYNLAB MVZ Weiden                                                                                             | Robert Koch Institute | unknown |
| EPI_ISL_1151530                                                                                                                                 | SYNLAB MVZ Trier                                                                                              | Robert Koch Institute | unknown |
| EPI_ISL_1151533                                                                                                                                 | SYNLAB Jena Oncoscreen                                                                                        | Robert Koch Institute | unknown |
| EPI_ISL_1151542                                                                                                                                 | Praxisgemeinschaft für Laboratoriumsmedizin Labor<br>Blumenstraße; Praxis Dr. Sel und Dr. Späte               | Robert Koch Institute | unknown |
| EPI_ISL_1151545, EPI_ISL_1151550,<br>EPI_ISL_1151564, EPI_ISL_1151574                                                                           | SYNLAB MVZ Weiden                                                                                             | Robert Koch Institute | unknown |
| EPI_ISL_1151578                                                                                                                                 | SYNLAB Jena Oncoscreen                                                                                        | Robert Koch Institute | unknown |
| EPI_ISL_1151579                                                                                                                                 | SYNLAB MVZ Trier                                                                                              | Robert Koch Institute | unknown |
| EPI_ISL_1151582, EPI_ISL_1151591                                                                                                                | SYNLAB MVZ Weiden                                                                                             | Robert Koch Institute | unknown |
| EPI_ISL_1151599                                                                                                                                 | SYNLAB MVZ Trier                                                                                              | Robert Koch Institute | unknown |
| EPI_ISL_1151607                                                                                                                                 | SYNLAB MVZ Leverkusen                                                                                         | Robert Koch Institute | unknown |
| EPI_ISL_1151610                                                                                                                                 | SYNLAB MVZ Weiden                                                                                             | Robert Koch Institute | unknown |
| EPI_ISL_1151619                                                                                                                                 | SYNLAB MVZ Leverkusen                                                                                         | Robert Koch Institute | unknown |
| EPI_ISL_1151624                                                                                                                                 | Praxisgemeinschaft für Laboratoriumsmedizin Labor<br>Blumenstraße; Praxis Dr. E. Wietschel & Dr. F. Wietschel | Robert Koch Institute | unknown |
| EPI_ISL_1151627, EPI_ISL_1151634,                                                                                                               | SYNLAB MVZ Trier                                                                                              | Robert Koch Institute | unknown |

|                                                      |                                                                                                               |                       |         |
|------------------------------------------------------|---------------------------------------------------------------------------------------------------------------|-----------------------|---------|
| EPI_ISL_1151639                                      |                                                                                                               |                       |         |
| EPI_ISL_1151642                                      | SYNLAB MVZ Weiden                                                                                             | Robert Koch Institute | unknown |
| EPI_ISL_1151646                                      | SYNLAB Jena Oncoscreen                                                                                        | Robert Koch Institute | unknown |
| EPI_ISL_1151650                                      | SYNLAB MVZ Weiden                                                                                             | Robert Koch Institute | unknown |
| EPI_ISL_1151652                                      | SYNLAB Jena Oncoscreen                                                                                        | Robert Koch Institute | unknown |
| EPI_ISL_1151653                                      | SYNLAB MVZ Heidelberg                                                                                         | Robert Koch Institute | unknown |
| EPI_ISL_1151655, EPI_ISL_1151657                     | SYNLAB Jena Oncoscreen                                                                                        | Robert Koch Institute | unknown |
| EPI_ISL_1151670                                      | Praxisgemeinschaft für Laboratoriumsmedizin Labor<br>Blumenstraße; Praxis Dr. Sel und Dr. Späte               | Robert Koch Institute | unknown |
| EPI_ISL_1151675                                      | Praxisgemeinschaft für Laboratoriumsmedizin Labor<br>Blumenstraße; Praxis Dr. E. Wietschel & Dr. F. Wietschel | Robert Koch Institute | unknown |
| EPI_ISL_1151676                                      | Labor für medizinische Mikrobiologie Bakteriologie Mykologie<br>Virologie & Infektionsserologie               | Robert Koch Institute | unknown |
| EPI_ISL_1151679                                      | SYNLAB Jena Oncoscreen                                                                                        | Robert Koch Institute | unknown |
| EPI_ISL_1151694                                      | SYNLAB MVZ Trier                                                                                              | Robert Koch Institute | unknown |
| EPI_ISL_1151695                                      | SYNLAB MVZ Weiden                                                                                             | Robert Koch Institute | unknown |
| EPI_ISL_1151696                                      | SYNLAB MVZ Trier                                                                                              | Robert Koch Institute | unknown |
| EPI_ISL_1151699                                      | SYNLAB MVZ Dachau                                                                                             | Robert Koch Institute | unknown |
| EPI_ISL_1151703                                      | Labor Dr. Schumacher MVZ                                                                                      | Robert Koch Institute | unknown |
| EPI_ISL_1151707                                      | SYNLAB Jena Oncoscreen                                                                                        | Robert Koch Institute | unknown |
| EPI_ISL_1151713                                      | SYNLAB MVZ Weiden                                                                                             | Robert Koch Institute | unknown |
| EPI_ISL_1151724                                      | SYNLAB MVZ Heidelberg                                                                                         | Robert Koch Institute | unknown |
| EPI_ISL_1151725                                      | Synlab MVZ Augsburg                                                                                           | Robert Koch Institute | unknown |
| EPI_ISL_1151739                                      | SYNLAB MVZ Weiden                                                                                             | Robert Koch Institute | unknown |
| EPI_ISL_1151747                                      | SYNLAB Jena Oncoscreen                                                                                        | Robert Koch Institute | unknown |
| EPI_ISL_1151762                                      | SYNLAB MVZ Trier                                                                                              | Robert Koch Institute | unknown |
| EPI_ISL_1151766                                      | SYNLAB Jena Oncoscreen                                                                                        | Robert Koch Institute | unknown |
| EPI_ISL_1151767                                      | SYNLAB MVZ Berlin                                                                                             | Robert Koch Institute | unknown |
| EPI_ISL_1151772                                      | Uniklinikum Carl Gustav Carus an der TU Dresden; Institut für<br>Virologie                                    | Robert Koch Institute | unknown |
| EPI_ISL_1151773                                      | Städtisches Klinikum Dresden                                                                                  | Robert Koch Institute | unknown |
| EPI_ISL_1151774                                      | Uniklinikum Carl Gustav Carus an der TU Dresden; Institut für<br>Virologie                                    | Robert Koch Institute | unknown |
| EPI_ISL_1151775                                      | Städtisches Klinikum Dresden                                                                                  | Robert Koch Institute | unknown |
| EPI_ISL_1151776                                      | Uniklinikum Carl Gustav Carus an der TU Dresden; Institut für<br>Virologie                                    | Robert Koch Institute | unknown |
| EPI_ISL_1151777                                      | Städtisches Klinikum Dresden                                                                                  | Robert Koch Institute | unknown |
| EPI_ISL_1151778                                      | Uniklinikum Carl Gustav Carus an der TU Dresden; Institut für<br>Virologie                                    | Robert Koch Institute | unknown |
| EPI_ISL_1151781                                      | LABOR CHEMNITZ - Zentrum für Diagnostik am Klinikum<br>Chemnitz                                               | Robert Koch Institute | unknown |
| EPI_ISL_1151784, EPI_ISL_1151785,<br>EPI_ISL_1151786 | Uniklinikum Carl Gustav Carus an der TU Dresden; Institut für<br>Virologie                                    | Robert Koch Institute | unknown |
| EPI_ISL_1151788                                      | Städtisches Klinikum Dresden                                                                                  | Robert Koch Institute | unknown |
| EPI_ISL_1151790                                      | Oberlausitz Kliniken gGmbH                                                                                    | Robert Koch Institute | unknown |
| EPI_ISL_1151791                                      | Uniklinikum Carl Gustav Carus an der TU Dresden; Institut für<br>Virologie                                    | Robert Koch Institute | unknown |
| EPI_ISL_1151792                                      | Städtisches Klinikum Dresden                                                                                  | Robert Koch Institute | unknown |
| EPI_ISL_1151793                                      | Uniklinikum Carl Gustav Carus an der TU Dresden; Institut für<br>Virologie                                    | Robert Koch Institute | unknown |
| EPI_ISL_1151795                                      | Städtisches Klinikum Dresden                                                                                  | Robert Koch Institute | unknown |
| EPI_ISL_1151796                                      | Uniklinikum Carl Gustav Carus an der TU Dresden; Institut für<br>Virologie                                    | Robert Koch Institute | unknown |
| EPI_ISL_1151797                                      | Städtisches Klinikum Dresden                                                                                  | Robert Koch Institute | unknown |
| EPI_ISL_1151799, EPI_ISL_1151800                     | Uniklinikum Carl Gustav Carus an der TU Dresden; Institut für<br>Virologie                                    | Robert Koch Institute | unknown |
| EPI_ISL_1151801                                      | Städtisches Klinikum Dresden                                                                                  | Robert Koch Institute | unknown |
| EPI_ISL_1151803, EPI_ISL_1151804                     | Uniklinikum Carl Gustav Carus an der TU Dresden; Institut für<br>Virologie                                    | Robert Koch Institute | unknown |
| EPI_ISL_1151805, EPI_ISL_1151806,<br>EPI_ISL_1151807 | Städtisches Klinikum Dresden                                                                                  | Robert Koch Institute | unknown |
| EPI_ISL_1151808                                      | Uniklinikum Carl Gustav Carus an der TU Dresden; Institut für<br>Virologie                                    | Robert Koch Institute | unknown |
| EPI_ISL_1151895                                      | IMD - Labor Oderland                                                                                          | Robert Koch Institute | unknown |

|                                                                                                                                                                                                                                                                                                                                                                                                          |                                                           |                       |         |
|----------------------------------------------------------------------------------------------------------------------------------------------------------------------------------------------------------------------------------------------------------------------------------------------------------------------------------------------------------------------------------------------------------|-----------------------------------------------------------|-----------------------|---------|
| EPI_ISL_1151896                                                                                                                                                                                                                                                                                                                                                                                          | IMD - Medizinisches Labor Rostock                         | Robert Koch Institute | unknown |
| EPI_ISL_1151897, EPI_ISL_1151898                                                                                                                                                                                                                                                                                                                                                                         | IMD - Labor Oderland                                      | Robert Koch Institute | unknown |
| EPI_ISL_1151899                                                                                                                                                                                                                                                                                                                                                                                          | LADR MVZ Zweigpraxis Bernau                               | Robert Koch Institute | unknown |
| EPI_ISL_1151900, EPI_ISL_1151901                                                                                                                                                                                                                                                                                                                                                                         | IMD - Labor Oderland                                      | Robert Koch Institute | unknown |
| EPI_ISL_1151902, EPI_ISL_1151903                                                                                                                                                                                                                                                                                                                                                                         | LADR MVZ Zweigpraxis Bernau                               | Robert Koch Institute | unknown |
| EPI_ISL_1151904                                                                                                                                                                                                                                                                                                                                                                                          | IMD - Labor Oderland                                      | Robert Koch Institute | unknown |
| EPI_ISL_1151906                                                                                                                                                                                                                                                                                                                                                                                          | LADR MVZ Zweigpraxis Bernau                               | Robert Koch Institute | unknown |
| EPI_ISL_1151907                                                                                                                                                                                                                                                                                                                                                                                          | IMD - Medizinisches Labor Rostock                         | Robert Koch Institute | unknown |
| EPI_ISL_1151908, EPI_ISL_1151909                                                                                                                                                                                                                                                                                                                                                                         | LADR MVZ Zweigpraxis Bernau                               | Robert Koch Institute | unknown |
| EPI_ISL_1151910, EPI_ISL_1151911,<br>EPI_ISL_1151912, EPI_ISL_1151913,<br>EPI_ISL_1151914                                                                                                                                                                                                                                                                                                                | IMD - Labor Oderland                                      | Robert Koch Institute | unknown |
| EPI_ISL_1151915, EPI_ISL_1151916,<br>EPI_ISL_1151917, EPI_ISL_1151919                                                                                                                                                                                                                                                                                                                                    | LADR MVZ Zweigpraxis Bernau                               | Robert Koch Institute | unknown |
| EPI_ISL_1151920                                                                                                                                                                                                                                                                                                                                                                                          | IMD - Medizinisches Labor Rostock                         | Robert Koch Institute | unknown |
| EPI_ISL_1151921                                                                                                                                                                                                                                                                                                                                                                                          | LADR MVZ Zweigpraxis Bernau                               | Robert Koch Institute | unknown |
| EPI_ISL_1151922, EPI_ISL_1151924,<br>EPI_ISL_1151925, EPI_ISL_1151926,<br>EPI_ISL_1151929                                                                                                                                                                                                                                                                                                                | IMD - Labor Oderland                                      | Robert Koch Institute | unknown |
| EPI_ISL_1151930                                                                                                                                                                                                                                                                                                                                                                                          | LADR MVZ Zweigpraxis Bernau                               | Robert Koch Institute | unknown |
| EPI_ISL_1151931, EPI_ISL_1151932,<br>EPI_ISL_1151933, EPI_ISL_1151934                                                                                                                                                                                                                                                                                                                                    | IMD - Labor Oderland                                      | Robert Koch Institute | unknown |
| EPI_ISL_1151935                                                                                                                                                                                                                                                                                                                                                                                          | LADR MVZ Zweigpraxis Bernau                               | Robert Koch Institute | unknown |
| EPI_ISL_1151936                                                                                                                                                                                                                                                                                                                                                                                          | IMD - Labor Oderland                                      | Robert Koch Institute | unknown |
| EPI_ISL_1151937, EPI_ISL_1151938                                                                                                                                                                                                                                                                                                                                                                         | LADR MVZ Zweigpraxis Bernau                               | Robert Koch Institute | unknown |
| EPI_ISL_1151940, EPI_ISL_1151941                                                                                                                                                                                                                                                                                                                                                                         | IMD - Labor Oderland                                      | Robert Koch Institute | unknown |
| EPI_ISL_1151942                                                                                                                                                                                                                                                                                                                                                                                          | LADR MVZ Zweigpraxis Bernau                               | Robert Koch Institute | unknown |
| EPI_ISL_1151943                                                                                                                                                                                                                                                                                                                                                                                          | IMD - Labor Oderland                                      | Robert Koch Institute | unknown |
| EPI_ISL_1151944                                                                                                                                                                                                                                                                                                                                                                                          | IMD - Medizinisches Labor Rostock                         | Robert Koch Institute | unknown |
| EPI_ISL_1151945                                                                                                                                                                                                                                                                                                                                                                                          | LADR MVZ Zweigpraxis Bernau                               | Robert Koch Institute | unknown |
| EPI_ISL_1151946, EPI_ISL_1151947,<br>EPI_ISL_1151948, EPI_ISL_1151949,<br>EPI_ISL_1151951, EPI_ISL_1151952,<br>EPI_ISL_1151953                                                                                                                                                                                                                                                                           | IMD - Labor Oderland                                      | Robert Koch Institute | unknown |
| EPI_ISL_1151954                                                                                                                                                                                                                                                                                                                                                                                          | LADR MVZ Zweigpraxis Bernau                               | Robert Koch Institute | unknown |
| EPI_ISL_1151955, EPI_ISL_1151956                                                                                                                                                                                                                                                                                                                                                                         | IMD - Labor Oderland                                      | Robert Koch Institute | unknown |
| EPI_ISL_1151957                                                                                                                                                                                                                                                                                                                                                                                          | LADR MVZ Zweigpraxis Bernau                               | Robert Koch Institute | unknown |
| EPI_ISL_1151958, EPI_ISL_1151959                                                                                                                                                                                                                                                                                                                                                                         | IMD - Labor Oderland                                      | Robert Koch Institute | unknown |
| EPI_ISL_1151960                                                                                                                                                                                                                                                                                                                                                                                          | IMD - Medizinisches Labor Rostock                         | Robert Koch Institute | unknown |
| EPI_ISL_1151961, EPI_ISL_1151962,<br>EPI_ISL_1151963                                                                                                                                                                                                                                                                                                                                                     | IMD - Labor Oderland                                      | Robert Koch Institute | unknown |
| EPI_ISL_1151964, EPI_ISL_1151965                                                                                                                                                                                                                                                                                                                                                                         | LADR MVZ Zweigpraxis Bernau                               | Robert Koch Institute | unknown |
| EPI_ISL_1151966                                                                                                                                                                                                                                                                                                                                                                                          | IMD - Institut für Medizinische Diagnostik Berlin-Potsdam | Robert Koch Institute | unknown |
| EPI_ISL_1151967                                                                                                                                                                                                                                                                                                                                                                                          | LADR MVZ Zweigpraxis Bernau                               | Robert Koch Institute | unknown |
| EPI_ISL_1151968                                                                                                                                                                                                                                                                                                                                                                                          | IMD - MVZ Labor Greifswald                                | Robert Koch Institute | unknown |
| EPI_ISL_1151969, EPI_ISL_1151970                                                                                                                                                                                                                                                                                                                                                                         | IMD - Institut für Medizinische Diagnostik Berlin-Potsdam | Robert Koch Institute | unknown |
| EPI_ISL_1151971                                                                                                                                                                                                                                                                                                                                                                                          | IMD - MVZ Labor Greifswald                                | Robert Koch Institute | unknown |
| EPI_ISL_1151973                                                                                                                                                                                                                                                                                                                                                                                          | IMD - Institut für Medizinische Diagnostik Berlin-Potsdam | Robert Koch Institute | unknown |
| EPI_ISL_1151974, EPI_ISL_1151975                                                                                                                                                                                                                                                                                                                                                                         | IMD - MVZ Labor Greifswald                                | Robert Koch Institute | unknown |
| EPI_ISL_1151976, EPI_ISL_1151978,<br>EPI_ISL_1151980, EPI_ISL_1151981                                                                                                                                                                                                                                                                                                                                    | LADR MVZ Zweigpraxis Bernau                               | Robert Koch Institute | unknown |
| EPI_ISL_1151982, EPI_ISL_1151983,<br>EPI_ISL_1151984                                                                                                                                                                                                                                                                                                                                                     | IMD - Institut für Medizinische Diagnostik Berlin-Potsdam | Robert Koch Institute | unknown |
| EPI_ISL_1151985, EPI_ISL_1151986,<br>EPI_ISL_1151988                                                                                                                                                                                                                                                                                                                                                     | LADR MVZ Zweigpraxis Bernau                               | Robert Koch Institute | unknown |
| EPI_ISL_1151989, EPI_ISL_1151990                                                                                                                                                                                                                                                                                                                                                                         | IMD - MVZ Labor Greifswald                                | Robert Koch Institute | unknown |
| EPI_ISL_1151991                                                                                                                                                                                                                                                                                                                                                                                          | LADR MVZ Zweigpraxis Bernau                               | Robert Koch Institute | unknown |
| EPI_ISL_1151999, EPI_ISL_1152000,<br>EPI_ISL_1152001, EPI_ISL_1152002                                                                                                                                                                                                                                                                                                                                    | Limbach - MVZ Humangenetik Ulm                            | Robert Koch Institute | unknown |
| EPI_ISL_1152010, EPI_ISL_1152011                                                                                                                                                                                                                                                                                                                                                                         | Medizinisch-Diagnostisches Labor Kempten allgäulab        | Robert Koch Institute | unknown |
| EPI_ISL_1152013                                                                                                                                                                                                                                                                                                                                                                                          | Labor Dr. Heidrich & Kollegen MVZ GmbH Hamburg            | Robert Koch Institute | unknown |
| EPI_ISL_1152014, EPI_ISL_1152015, EPI_ISL_1152017, EPI_ISL_1152019, EPI_ISL_1152020, EPI_ISL_1152023, EPI_ISL_1152024, EPI_ISL_1152025, EPI_ISL_1152026, EPI_ISL_1152027, EPI_ISL_1152028, EPI_ISL_1152029, EPI_ISL_1152030, EPI_ISL_1152031, EPI_ISL_1152032, EPI_ISL_1152033, EPI_ISL_1152035,<br>EPI_ISL_1152036, EPI_ISL_1152037, EPI_ISL_1152038, EPI_ISL_1152039, EPI_ISL_1152040, EPI_ISL_1152041 |                                                           |                       |         |
| see above                                                                                                                                                                                                                                                                                                                                                                                                | Medizinisch-Diagnostisches Labor Kempten allgäulab        | Robert Koch Institute | unknown |

|                                                                    |                                                                                                          |                       |         |
|--------------------------------------------------------------------|----------------------------------------------------------------------------------------------------------|-----------------------|---------|
| EPI_ISL_1152396, EPI_ISL_1152407                                   | Universitätsklinikum Leipzig - Institut für Medizinische Mikrobiologie und Virologie virologisches Labor | Robert Koch Institute | unknown |
| EPI_ISL_1152526, EPI_ISL_1152528                                   | Labormedizin Darmstadt                                                                                   | Robert Koch Institute | unknown |
| EPI_ISL_1152533                                                    | MVZ Labor Dr. Reising-Ackermann und Kollegen                                                             | Robert Koch Institute | unknown |
| EPI_ISL_1152556, EPI_ISL_1152567                                   | Limbach - MVZ Labor Eveld & Kollegen Essen                                                               | Robert Koch Institute | unknown |
| EPI_ISL_1152571, EPI_ISL_1152589, EPI_ISL_1152593, EPI_ISL_1152600 | MDI Limbach Berlin GmbH                                                                                  | Robert Koch Institute | unknown |
| EPI_ISL_1152606                                                    | Limbach - Ganzimmun Diagnostics AG Mainz                                                                 | Robert Koch Institute | unknown |
| EPI_ISL_1152607                                                    | MDI Limbach Berlin GmbH                                                                                  | Robert Koch Institute | unknown |
| EPI_ISL_1152623                                                    | SYNLAB MVZ Leinfelden-Echterdingen                                                                       | Robert Koch Institute | unknown |
| EPI_ISL_1152626                                                    | SYNLAB MVZ Ettlingen                                                                                     | Robert Koch Institute | unknown |
| EPI_ISL_1152629                                                    | SYNLAB Jena Oncoscreen                                                                                   | Robert Koch Institute | unknown |
| EPI_ISL_1152631                                                    | SYNLAB MVZ Ettlingen                                                                                     | Robert Koch Institute | unknown |
| EPI_ISL_1152640                                                    | SYNLAB MVZ Weiden                                                                                        | Robert Koch Institute | unknown |
| EPI_ISL_1152645                                                    | SYNLAB Jena Oncoscreen                                                                                   | Robert Koch Institute | unknown |
| EPI_ISL_1152654                                                    | SYNLAB MVZ Leverkusen                                                                                    | Robert Koch Institute | unknown |
| EPI_ISL_1152656                                                    | SYNLAB MVZ Leinfelden-Echterdingen                                                                       | Robert Koch Institute | unknown |
| EPI_ISL_1152657                                                    | Labor für medizinische Mikrobiologie Bakteriologie Mykologie Virologie & Infektionsserologie             | Robert Koch Institute | unknown |
| EPI_ISL_1152659                                                    | SYNLAB MVZ Hamburg                                                                                       | Robert Koch Institute | unknown |
| EPI_ISL_1152660                                                    | Labor für medizinische Mikrobiologie Bakteriologie Mykologie Virologie & Infektionsserologie             | Robert Koch Institute | unknown |
| EPI_ISL_1152665                                                    | SYNLAB MVZ Leverkusen                                                                                    | Robert Koch Institute | unknown |
| EPI_ISL_1152666                                                    | SYNLAB MVZ Trier                                                                                         | Robert Koch Institute | unknown |
| EPI_ISL_1152671                                                    | SYNLAB MVZ Weiden                                                                                        | Robert Koch Institute | unknown |
| EPI_ISL_1152681, EPI_ISL_1152683                                   | SYNLAB Jena Oncoscreen                                                                                   | Robert Koch Institute | unknown |
| EPI_ISL_1152694                                                    | SYNLAB MVZ Ettlingen                                                                                     | Robert Koch Institute | unknown |
| EPI_ISL_1152701                                                    | SYNLAB MVZ Leverkusen                                                                                    | Robert Koch Institute | unknown |
| EPI_ISL_1152708                                                    | SYNLAB MVZ Ettlingen                                                                                     | Robert Koch Institute | unknown |
| EPI_ISL_1152711                                                    | SYNLAB MVZ Hamburg                                                                                       | Robert Koch Institute | unknown |
| EPI_ISL_1152712, EPI_ISL_1152714                                   | SYNLAB MVZ Weiden                                                                                        | Robert Koch Institute | unknown |
| EPI_ISL_1152719, EPI_ISL_1152721, EPI_ISL_1152722                  | SYNLAB MVZ Leverkusen                                                                                    | Robert Koch Institute | unknown |
| EPI_ISL_1152732                                                    | SYNLAB MVZ Weiden                                                                                        | Robert Koch Institute | unknown |
| EPI_ISL_1152744                                                    | SYNLAB MVZ Leverkusen                                                                                    | Robert Koch Institute | unknown |
| EPI_ISL_1152745                                                    | SYNLAB MVZ Weiden                                                                                        | Robert Koch Institute | unknown |
| EPI_ISL_1152746                                                    | SYNLAB Jena Oncoscreen                                                                                   | Robert Koch Institute | unknown |
| EPI_ISL_1152752                                                    | SYNLAB MVZ Weiden                                                                                        | Robert Koch Institute | unknown |
| EPI_ISL_1152778                                                    | SYNLAB MVZ Ettlingen                                                                                     | Robert Koch Institute | unknown |
| EPI_ISL_1152779, EPI_ISL_1152784, EPI_ISL_1152785                  | SYNLAB MVZ Leverkusen                                                                                    | Robert Koch Institute | unknown |
| EPI_ISL_1152786                                                    | SYNLAB MVZ Hamburg                                                                                       | Robert Koch Institute | unknown |
| EPI_ISL_1152792                                                    | SYNLAB MVZ Weiden                                                                                        | Robert Koch Institute | unknown |
| EPI_ISL_1152793, EPI_ISL_1152799, EPI_ISL_1152806                  | SYNLAB MVZ Leverkusen                                                                                    | Robert Koch Institute | unknown |
| EPI_ISL_1152807                                                    | SYNLAB Jena Oncoscreen                                                                                   | Robert Koch Institute | unknown |
| EPI_ISL_1152810                                                    | SYNLAB MVZ Weiden                                                                                        | Robert Koch Institute | unknown |
| EPI_ISL_1152811                                                    | SYNLAB MVZ Leverkusen                                                                                    | Robert Koch Institute | unknown |
| EPI_ISL_1152812                                                    | SYNLAB Jena Oncoscreen                                                                                   | Robert Koch Institute | unknown |
| EPI_ISL_1152820                                                    | SYNLAB MVZ Leverkusen                                                                                    | Robert Koch Institute | unknown |
| EPI_ISL_1152826, EPI_ISL_1152828                                   | SYNLAB Jena Oncoscreen                                                                                   | Robert Koch Institute | unknown |
| EPI_ISL_1152830                                                    | SYNLAB MVZ Weiden                                                                                        | Robert Koch Institute | unknown |
| EPI_ISL_1152835                                                    | SYNLAB MVZ Leverkusen                                                                                    | Robert Koch Institute | unknown |
| EPI_ISL_1152841, EPI_ISL_1152851, EPI_ISL_1152853                  | SYNLAB Jena Oncoscreen                                                                                   | Robert Koch Institute | unknown |
| EPI_ISL_1152856, EPI_ISL_1152865, EPI_ISL_1152867                  | SYNLAB MVZ Weiden                                                                                        | Robert Koch Institute | unknown |
| EPI_ISL_1152870                                                    | SYNLAB MVZ Leinfelden-Echterdingen                                                                       | Robert Koch Institute | unknown |
| EPI_ISL_1152872                                                    | SYNLAB MVZ Weiden                                                                                        | Robert Koch Institute | unknown |
| EPI_ISL_1152873, EPI_ISL_1152878                                   | SYNLAB MVZ Trier                                                                                         | Robert Koch Institute | unknown |
| EPI_ISL_1152880                                                    | SYNLAB MVZ Berlin                                                                                        | Robert Koch Institute | unknown |

|                                                                                                                                                                                                                                                                                                                                                                                                                                                                                                                                                                                                                                                                                                                                                                                                                                                                                                                                                                                                                                                                                                                        |                                                                      |                       |         |
|------------------------------------------------------------------------------------------------------------------------------------------------------------------------------------------------------------------------------------------------------------------------------------------------------------------------------------------------------------------------------------------------------------------------------------------------------------------------------------------------------------------------------------------------------------------------------------------------------------------------------------------------------------------------------------------------------------------------------------------------------------------------------------------------------------------------------------------------------------------------------------------------------------------------------------------------------------------------------------------------------------------------------------------------------------------------------------------------------------------------|----------------------------------------------------------------------|-----------------------|---------|
| EPI_ISL_1152884                                                                                                                                                                                                                                                                                                                                                                                                                                                                                                                                                                                                                                                                                                                                                                                                                                                                                                                                                                                                                                                                                                        | SYNLAB MVZ Leinfelden-Echterdingen                                   | Robert Koch Institute | unknown |
| EPI_ISL_1152886, EPI_ISL_1152889                                                                                                                                                                                                                                                                                                                                                                                                                                                                                                                                                                                                                                                                                                                                                                                                                                                                                                                                                                                                                                                                                       | SYNLAB MVZ Weiden                                                    | Robert Koch Institute | unknown |
| EPI_ISL_1152891                                                                                                                                                                                                                                                                                                                                                                                                                                                                                                                                                                                                                                                                                                                                                                                                                                                                                                                                                                                                                                                                                                        | SYNLAB MVZ Leinfelden-Echterdingen                                   | Robert Koch Institute | unknown |
| EPI_ISL_1152903, EPI_ISL_1152909,<br>EPI_ISL_1152912, EPI_ISL_1152914,<br>EPI_ISL_1152920                                                                                                                                                                                                                                                                                                                                                                                                                                                                                                                                                                                                                                                                                                                                                                                                                                                                                                                                                                                                                              | SYNLAB MVZ Weiden                                                    | Robert Koch Institute | unknown |
| EPI_ISL_1152922                                                                                                                                                                                                                                                                                                                                                                                                                                                                                                                                                                                                                                                                                                                                                                                                                                                                                                                                                                                                                                                                                                        | SYNLAB MVZ Berlin                                                    | Robert Koch Institute | unknown |
| EPI_ISL_1152929, EPI_ISL_1152933,<br>EPI_ISL_1152936, EPI_ISL_1152937,<br>EPI_ISL_1152942                                                                                                                                                                                                                                                                                                                                                                                                                                                                                                                                                                                                                                                                                                                                                                                                                                                                                                                                                                                                                              | SYNLAB MVZ Weiden                                                    | Robert Koch Institute | unknown |
| EPI_ISL_1152946                                                                                                                                                                                                                                                                                                                                                                                                                                                                                                                                                                                                                                                                                                                                                                                                                                                                                                                                                                                                                                                                                                        | SYNLAB MVZ Trier                                                     | Robert Koch Institute | unknown |
| EPI_ISL_1152947                                                                                                                                                                                                                                                                                                                                                                                                                                                                                                                                                                                                                                                                                                                                                                                                                                                                                                                                                                                                                                                                                                        | SYNLAB MVZ Weiden                                                    | Robert Koch Institute | unknown |
| EPI_ISL_1152956                                                                                                                                                                                                                                                                                                                                                                                                                                                                                                                                                                                                                                                                                                                                                                                                                                                                                                                                                                                                                                                                                                        | SYNLAB MVZ Berlin                                                    | Robert Koch Institute | unknown |
| EPI_ISL_1152961, EPI_ISL_1152968,<br>EPI_ISL_1152975, EPI_ISL_1152980,<br>EPI_ISL_1152981, EPI_ISL_1152983,<br>EPI_ISL_1152984, EPI_ISL_1152985                                                                                                                                                                                                                                                                                                                                                                                                                                                                                                                                                                                                                                                                                                                                                                                                                                                                                                                                                                        | SYNLAB MVZ Weiden                                                    | Robert Koch Institute | unknown |
| EPI_ISL_1152988                                                                                                                                                                                                                                                                                                                                                                                                                                                                                                                                                                                                                                                                                                                                                                                                                                                                                                                                                                                                                                                                                                        | SYNLAB MVZ Berlin                                                    | Robert Koch Institute | unknown |
| EPI_ISL_1152995                                                                                                                                                                                                                                                                                                                                                                                                                                                                                                                                                                                                                                                                                                                                                                                                                                                                                                                                                                                                                                                                                                        | SYNLAB MVZ Weiden                                                    | Robert Koch Institute | unknown |
| EPI_ISL_1153006                                                                                                                                                                                                                                                                                                                                                                                                                                                                                                                                                                                                                                                                                                                                                                                                                                                                                                                                                                                                                                                                                                        | SYNLAB MVZ Berlin                                                    | Robert Koch Institute | unknown |
| EPI_ISL_1153007, EPI_ISL_1153010,<br>EPI_ISL_1153011                                                                                                                                                                                                                                                                                                                                                                                                                                                                                                                                                                                                                                                                                                                                                                                                                                                                                                                                                                                                                                                                   | SYNLAB MVZ Weiden                                                    | Robert Koch Institute | unknown |
| EPI_ISL_1153014                                                                                                                                                                                                                                                                                                                                                                                                                                                                                                                                                                                                                                                                                                                                                                                                                                                                                                                                                                                                                                                                                                        | SYNLAB MVZ Berlin                                                    | Robert Koch Institute | unknown |
| EPI_ISL_1153019, EPI_ISL_1153028,<br>EPI_ISL_1153033, EPI_ISL_1153034                                                                                                                                                                                                                                                                                                                                                                                                                                                                                                                                                                                                                                                                                                                                                                                                                                                                                                                                                                                                                                                  | SYNLAB MVZ Weiden                                                    | Robert Koch Institute | unknown |
| EPI_ISL_1153046                                                                                                                                                                                                                                                                                                                                                                                                                                                                                                                                                                                                                                                                                                                                                                                                                                                                                                                                                                                                                                                                                                        | SYNLAB MVZ Trier                                                     | Robert Koch Institute | unknown |
| EPI_ISL_1153050, EPI_ISL_1153052,<br>EPI_ISL_1153061, EPI_ISL_1153063,<br>EPI_ISL_1153072                                                                                                                                                                                                                                                                                                                                                                                                                                                                                                                                                                                                                                                                                                                                                                                                                                                                                                                                                                                                                              | SYNLAB MVZ Weiden                                                    | Robert Koch Institute | unknown |
| EPI_ISL_1153074                                                                                                                                                                                                                                                                                                                                                                                                                                                                                                                                                                                                                                                                                                                                                                                                                                                                                                                                                                                                                                                                                                        | Synlab MVZ Augsburg                                                  | Robert Koch Institute | unknown |
| EPI_ISL_1153088                                                                                                                                                                                                                                                                                                                                                                                                                                                                                                                                                                                                                                                                                                                                                                                                                                                                                                                                                                                                                                                                                                        | SYNLAB MVZ Trier                                                     | Robert Koch Institute | unknown |
| EPI_ISL_1153099, EPI_ISL_1153103,<br>EPI_ISL_1153108, EPI_ISL_1153112,<br>EPI_ISL_1153117, EPI_ISL_1153118                                                                                                                                                                                                                                                                                                                                                                                                                                                                                                                                                                                                                                                                                                                                                                                                                                                                                                                                                                                                             | SYNLAB MVZ Weiden                                                    | Robert Koch Institute | unknown |
| EPI_ISL_1153165, EPI_ISL_1153167, EPI_ISL_1153168, EPI_ISL_1153169, EPI_ISL_1153170, EPI_ISL_1153171, EPI_ISL_1153172, EPI_ISL_1153173, EPI_ISL_1153174, EPI_ISL_1153178, EPI_ISL_1153179, EPI_ISL_1153180, EPI_ISL_1153181, EPI_ISL_1153183, EPI_ISL_1153184, EPI_ISL_1153185, EPI_ISL_1153186,<br>EPI_ISL_1153187, EPI_ISL_1153189, EPI_ISL_1153192, EPI_ISL_1153193, EPI_ISL_1153194, EPI_ISL_1153195, EPI_ISL_1153196, EPI_ISL_1153197, EPI_ISL_1153199, EPI_ISL_1153200, EPI_ISL_1153201, EPI_ISL_1153202, EPI_ISL_1153203, EPI_ISL_1153204, EPI_ISL_1153205, EPI_ISL_1153206, EPI_ISL_1153207,<br>EPI_ISL_1153208, EPI_ISL_1153209, EPI_ISL_1153210, EPI_ISL_1153211, EPI_ISL_1153212, EPI_ISL_1153213, EPI_ISL_1153214, EPI_ISL_1153215, EPI_ISL_1153216, EPI_ISL_1153219, EPI_ISL_1153220, EPI_ISL_1153221, EPI_ISL_1153223, EPI_ISL_1153224, EPI_ISL_1153225, EPI_ISL_1153227, EPI_ISL_1153228,<br>EPI_ISL_1153229, EPI_ISL_1153230, EPI_ISL_1153231, EPI_ISL_1153233, EPI_ISL_1153234, EPI_ISL_1153235, EPI_ISL_1153236, EPI_ISL_1153237, EPI_ISL_1153238, EPI_ISL_1153239, EPI_ISL_1153241, EPI_ISL_1153242 |                                                                      |                       |         |
| see above                                                                                                                                                                                                                                                                                                                                                                                                                                                                                                                                                                                                                                                                                                                                                                                                                                                                                                                                                                                                                                                                                                              | Eurofins LifeCodexx GmbH                                             | Robert Koch Institute | unknown |
| EPI_ISL_1153255                                                                                                                                                                                                                                                                                                                                                                                                                                                                                                                                                                                                                                                                                                                                                                                                                                                                                                                                                                                                                                                                                                        | Sonic - Labor Staber Bayreuth                                        | Robert Koch Institute | unknown |
| EPI_ISL_1153264, EPI_ISL_1153265,<br>EPI_ISL_1153283, EPI_ISL_1153292,<br>EPI_ISL_1153296                                                                                                                                                                                                                                                                                                                                                                                                                                                                                                                                                                                                                                                                                                                                                                                                                                                                                                                                                                                                                              | Sonic - Labor Staber Dresden (Klipphausen)                           | Robert Koch Institute | unknown |
| EPI_ISL_1153448                                                                                                                                                                                                                                                                                                                                                                                                                                                                                                                                                                                                                                                                                                                                                                                                                                                                                                                                                                                                                                                                                                        | Chemische und Veterinäruntersuchungsamt<br>Münsterland-Emscher-Lippe | Robert Koch Institute | unknown |
| EPI_ISL_1153522                                                                                                                                                                                                                                                                                                                                                                                                                                                                                                                                                                                                                                                                                                                                                                                                                                                                                                                                                                                                                                                                                                        | Labor Lübeck bzw. Laborärztliche Gemeinschaftspraxis<br>Lübeck       | Robert Koch Institute | unknown |
| EPI_ISL_1153532, EPI_ISL_1153533,<br>EPI_ISL_1153534, EPI_ISL_1153536                                                                                                                                                                                                                                                                                                                                                                                                                                                                                                                                                                                                                                                                                                                                                                                                                                                                                                                                                                                                                                                  | Chemische und Veterinäruntersuchungsamt<br>Münsterland-Emscher-Lippe | Robert Koch Institute | unknown |
| EPI_ISL_1153541, EPI_ISL_1153542                                                                                                                                                                                                                                                                                                                                                                                                                                                                                                                                                                                                                                                                                                                                                                                                                                                                                                                                                                                                                                                                                       | SYNLAB MVZ Weiden                                                    | Robert Koch Institute | unknown |
| EPI_ISL_1153543                                                                                                                                                                                                                                                                                                                                                                                                                                                                                                                                                                                                                                                                                                                                                                                                                                                                                                                                                                                                                                                                                                        | SYNLAB MVZ Leinfelden-Echterdingen                                   | Robert Koch Institute | unknown |
| EPI_ISL_1153544                                                                                                                                                                                                                                                                                                                                                                                                                                                                                                                                                                                                                                                                                                                                                                                                                                                                                                                                                                                                                                                                                                        | SYNLAB MVZ Weiden                                                    | Robert Koch Institute | unknown |
| EPI_ISL_1153547                                                                                                                                                                                                                                                                                                                                                                                                                                                                                                                                                                                                                                                                                                                                                                                                                                                                                                                                                                                                                                                                                                        | SYNLAB MVZ Trier                                                     | Robert Koch Institute | unknown |
| EPI_ISL_1153560                                                                                                                                                                                                                                                                                                                                                                                                                                                                                                                                                                                                                                                                                                                                                                                                                                                                                                                                                                                                                                                                                                        | SYNLAB MVZ Weiden                                                    | Robert Koch Institute | unknown |
| EPI_ISL_1153561                                                                                                                                                                                                                                                                                                                                                                                                                                                                                                                                                                                                                                                                                                                                                                                                                                                                                                                                                                                                                                                                                                        | SYNLAB MVZ Leinfelden-Echterdingen                                   | Robert Koch Institute | unknown |
| EPI_ISL_1153565, EPI_ISL_1153568                                                                                                                                                                                                                                                                                                                                                                                                                                                                                                                                                                                                                                                                                                                                                                                                                                                                                                                                                                                                                                                                                       | SYNLAB MVZ Weiden                                                    | Robert Koch Institute | unknown |
| EPI_ISL_1153572                                                                                                                                                                                                                                                                                                                                                                                                                                                                                                                                                                                                                                                                                                                                                                                                                                                                                                                                                                                                                                                                                                        | SYNLAB MVZ Trier                                                     | Robert Koch Institute | unknown |
| EPI_ISL_1153573, EPI_ISL_1153576,<br>EPI_ISL_1153578, EPI_ISL_1153581                                                                                                                                                                                                                                                                                                                                                                                                                                                                                                                                                                                                                                                                                                                                                                                                                                                                                                                                                                                                                                                  | SYNLAB MVZ Weiden                                                    | Robert Koch Institute | unknown |
| EPI_ISL_1153583                                                                                                                                                                                                                                                                                                                                                                                                                                                                                                                                                                                                                                                                                                                                                                                                                                                                                                                                                                                                                                                                                                        | SYNLAB MVZ Leinfelden-Echterdingen                                   | Robert Koch Institute | unknown |
| EPI_ISL_1153586, EPI_ISL_1153587,<br>EPI_ISL_1153588                                                                                                                                                                                                                                                                                                                                                                                                                                                                                                                                                                                                                                                                                                                                                                                                                                                                                                                                                                                                                                                                   | SYNLAB MVZ Weiden                                                    | Robert Koch Institute | unknown |
| EPI_ISL_1153595                                                                                                                                                                                                                                                                                                                                                                                                                                                                                                                                                                                                                                                                                                                                                                                                                                                                                                                                                                                                                                                                                                        | Synlab MVZ Augsburg                                                  | Robert Koch Institute | unknown |
| EPI_ISL_1153602                                                                                                                                                                                                                                                                                                                                                                                                                                                                                                                                                                                                                                                                                                                                                                                                                                                                                                                                                                                                                                                                                                        | SYNLAB MVZ Dachau                                                    | Robert Koch Institute | unknown |
| EPI_ISL_1153606, EPI_ISL_1153608,<br>EPI_ISL_1153610, EPI_ISL_1153611,<br>EPI_ISL_1153618                                                                                                                                                                                                                                                                                                                                                                                                                                                                                                                                                                                                                                                                                                                                                                                                                                                                                                                                                                                                                              | SYNLAB MVZ Weiden                                                    | Robert Koch Institute | unknown |

|                                                                                     |                                                                                              |                       |         |
|-------------------------------------------------------------------------------------|----------------------------------------------------------------------------------------------|-----------------------|---------|
| EPI_ISL_1153624                                                                     | SYNLAB MVZ Berlin                                                                            | Robert Koch Institute | unknown |
| EPI_ISL_1153664, EPI_ISL_1153666                                                    | MVZ Labor Dr. Fenner und Kollegen (Standort Hamburg)                                         | Robert Koch Institute | unknown |
| EPI_ISL_1153966                                                                     | Limbach - MVZ Gemeinschaftslabor Suhl                                                        | Robert Koch Institute | unknown |
| EPI_ISL_1153968                                                                     | MVZ Labor Dr. Reising-Ackermann und Kollegen                                                 | Robert Koch Institute | unknown |
| EPI_ISL_1153969, EPI_ISL_1153970                                                    | Limbach - MVZ Labor Eveld & Kollegen Essen                                                   | Robert Koch Institute | unknown |
| EPI_ISL_1153971                                                                     | Labor MönchengladbachMVZ Dr. Stein + Kollegen GbR                                            | Robert Koch Institute | unknown |
| EPI_ISL_1153974                                                                     | MDI Limbach Berlin GmbH                                                                      | Robert Koch Institute | unknown |
| EPI_ISL_1153978                                                                     | Labor MönchengladbachMVZ Dr. Stein + Kollegen GbR                                            | Robert Koch Institute | unknown |
| EPI_ISL_1153979, EPI_ISL_1153982                                                    | Limbach - MVZ Gemeinschaftslabor Suhl                                                        | Robert Koch Institute | unknown |
| EPI_ISL_1153985, EPI_ISL_1153986                                                    | MDI Limbach Berlin GmbH                                                                      | Robert Koch Institute | unknown |
| EPI_ISL_1153987                                                                     | Limbach - MVZ Labor Eveld & Kollegen Essen                                                   | Robert Koch Institute | unknown |
| EPI_ISL_1153988                                                                     | Limbach - MVZ Gemeinschaftslabor Suhl                                                        | Robert Koch Institute | unknown |
| EPI_ISL_1153991, EPI_ISL_1153992                                                    | MDI Limbach Berlin GmbH                                                                      | Robert Koch Institute | unknown |
| EPI_ISL_1153993                                                                     | Limbach - MVZ Labor Eveld & Kollegen Essen                                                   | Robert Koch Institute | unknown |
| EPI_ISL_1153995, EPI_ISL_1153997                                                    | MDI Limbach Berlin GmbH                                                                      | Robert Koch Institute | unknown |
| EPI_ISL_1153998                                                                     | Limbach - MVZ Labor Eveld & Kollegen Essen                                                   | Robert Koch Institute | unknown |
| EPI_ISL_1153999, EPI_ISL_1154000                                                    | MDI Limbach Berlin GmbH                                                                      | Robert Koch Institute | unknown |
| EPI_ISL_1154003, EPI_ISL_1154005                                                    | Limbach - MVZ Labor Eveld & Kollegen Essen                                                   | Robert Koch Institute | unknown |
| EPI_ISL_1154006                                                                     | Labor MönchengladbachMVZ Dr. Stein + Kollegen GbR                                            | Robert Koch Institute | unknown |
| EPI_ISL_1154008                                                                     | Limbach - MVZ Labor Eveld & Kollegen Essen                                                   | Robert Koch Institute | unknown |
| EPI_ISL_1154009, EPI_ISL_1154010, EPI_ISL_1154011, EPI_ISL_1154013, EPI_ISL_1154015 | MDI Limbach Berlin GmbH                                                                      | Robert Koch Institute | unknown |
| EPI_ISL_1154016, EPI_ISL_1154017                                                    | Limbach - MVZ Labor Eveld & Kollegen Essen                                                   | Robert Koch Institute | unknown |
| EPI_ISL_1154018, EPI_ISL_1154020, EPI_ISL_1154021                                   | MDI Limbach Berlin GmbH                                                                      | Robert Koch Institute | unknown |
| EPI_ISL_1154023, EPI_ISL_1154024                                                    | Limbach - MVZ Labor Eveld & Kollegen Essen                                                   | Robert Koch Institute | unknown |
| EPI_ISL_1154026, EPI_ISL_1154027                                                    | MDI Limbach Berlin GmbH                                                                      | Robert Koch Institute | unknown |
| EPI_ISL_1154028                                                                     | Limbach - MVZ Labor Eveld & Kollegen Essen                                                   | Robert Koch Institute | unknown |
| EPI_ISL_1154029                                                                     | MDI Limbach Berlin GmbH                                                                      | Robert Koch Institute | unknown |
| EPI_ISL_1154030, EPI_ISL_1154032                                                    | Limbach - MVZ Labor Eveld & Kollegen Essen                                                   | Robert Koch Institute | unknown |
| EPI_ISL_1154034, EPI_ISL_1154036                                                    | MDI Limbach Berlin GmbH                                                                      | Robert Koch Institute | unknown |
| EPI_ISL_1154038                                                                     | Limbach - MVZ Gemeinschaftslabor Suhl                                                        | Robert Koch Institute | unknown |
| EPI_ISL_1154039, EPI_ISL_1154041, EPI_ISL_1154042, EPI_ISL_1154043                  | MDI Limbach Berlin GmbH                                                                      | Robert Koch Institute | unknown |
| EPI_ISL_1154044                                                                     | MVZ Labor Dr. Limbach & Kollegen GbR                                                         | Robert Koch Institute | unknown |
| EPI_ISL_1154045                                                                     | MDI Limbach Berlin GmbH                                                                      | Robert Koch Institute | unknown |
| EPI_ISL_1154046                                                                     | Limbach - MVZ Labor Eveld & Kollegen Essen                                                   | Robert Koch Institute | unknown |
| EPI_ISL_1154184, EPI_ISL_1154188                                                    | SYNLAB MVZ Leverkusen                                                                        | Robert Koch Institute | unknown |
| EPI_ISL_1154189                                                                     | SYNLAB MVZ Ettlingen                                                                         | Robert Koch Institute | unknown |
| EPI_ISL_1154190, EPI_ISL_1154191                                                    | SYNLAB MVZ Leverkusen                                                                        | Robert Koch Institute | unknown |
| EPI_ISL_1154192                                                                     | SYNLAB MVZ Hamburg                                                                           | Robert Koch Institute | unknown |
| EPI_ISL_1154195                                                                     | SYNLAB MVZ Leverkusen                                                                        | Robert Koch Institute | unknown |
| EPI_ISL_1154198                                                                     | SYNLAB Jena Oncoscreen                                                                       | Robert Koch Institute | unknown |
| EPI_ISL_1154199                                                                     | SYNLAB MVZ Leverkusen                                                                        | Robert Koch Institute | unknown |
| EPI_ISL_1154202                                                                     | SYNLAB Jena Oncoscreen                                                                       | Robert Koch Institute | unknown |
| EPI_ISL_1154206                                                                     | Praxisgemeinschaft für Laboratoriumsmedizin Labor Blumenstraße; Praxis Dr. Sel und Dr. Späte | Robert Koch Institute | unknown |
| EPI_ISL_1154207                                                                     | SYNLAB MVZ Hamburg                                                                           | Robert Koch Institute | unknown |
| EPI_ISL_1154212                                                                     | SYNLAB MVZ Weiden                                                                            | Robert Koch Institute | unknown |
| EPI_ISL_1154215                                                                     | SYNLAB MVZ Ettlingen                                                                         | Robert Koch Institute | unknown |
| EPI_ISL_1154217                                                                     | SYNLAB MVZ Leinfelden-Echterdingen                                                           | Robert Koch Institute | unknown |
| EPI_ISL_1154218, EPI_ISL_1154224                                                    | SYNLAB MVZ Ettlingen                                                                         | Robert Koch Institute | unknown |
| EPI_ISL_1154227                                                                     | SYNLAB MVZ Weiden                                                                            | Robert Koch Institute | unknown |
| EPI_ISL_1154232, EPI_ISL_1154234                                                    | SYNLAB MVZ Ettlingen                                                                         | Robert Koch Institute | unknown |
| EPI_ISL_1154237                                                                     | SYNLAB MVZ Leverkusen                                                                        | Robert Koch Institute | unknown |
| EPI_ISL_1154238                                                                     | SYNLAB MVZ Ettlingen                                                                         | Robert Koch Institute | unknown |
| EPI_ISL_1154239                                                                     | SYNLAB MVZ Leverkusen                                                                        | Robert Koch Institute | unknown |
| EPI_ISL_1154240, EPI_ISL_1154242                                                    | SYNLAB MVZ Ettlingen                                                                         | Robert Koch Institute | unknown |
| EPI_ISL_1154243, EPI_ISL_1154245, EPI_ISL_1154253, EPI_ISL_1154254                  | SYNLAB MVZ Leverkusen                                                                        | Robert Koch Institute | unknown |

|                                                                                                                                                                     |                                                                                |                                                                                |                                                                                                                                                                                                                              |
|---------------------------------------------------------------------------------------------------------------------------------------------------------------------|--------------------------------------------------------------------------------|--------------------------------------------------------------------------------|------------------------------------------------------------------------------------------------------------------------------------------------------------------------------------------------------------------------------|
| EPI_ISL_1154255                                                                                                                                                     | SYNLAB MVZ Weiden                                                              | Robert Koch Institute                                                          | unknown                                                                                                                                                                                                                      |
| EPI_ISL_1154256                                                                                                                                                     | SYNLAB MVZ Ettlingen                                                           | Robert Koch Institute                                                          | unknown                                                                                                                                                                                                                      |
| EPI_ISL_1154257                                                                                                                                                     | SYNLAB MVZ Leverkusen                                                          | Robert Koch Institute                                                          | unknown                                                                                                                                                                                                                      |
| EPI_ISL_1154258                                                                                                                                                     | SYNLAB MVZ Hamburg                                                             | Robert Koch Institute                                                          | unknown                                                                                                                                                                                                                      |
| EPI_ISL_1154263                                                                                                                                                     | SYNLAB MVZ Ettlingen                                                           | Robert Koch Institute                                                          | unknown                                                                                                                                                                                                                      |
| EPI_ISL_1154265                                                                                                                                                     | SYNLAB MVZ Hamburg                                                             | Robert Koch Institute                                                          | unknown                                                                                                                                                                                                                      |
| EPI_ISL_1154271, EPI_ISL_1154272                                                                                                                                    | SYNLAB MVZ Ettlingen                                                           | Robert Koch Institute                                                          | unknown                                                                                                                                                                                                                      |
| EPI_ISL_1154273                                                                                                                                                     | SYNLAB MVZ Leverkusen                                                          | Robert Koch Institute                                                          | unknown                                                                                                                                                                                                                      |
| EPI_ISL_1154275, EPI_ISL_1154276,<br>EPI_ISL_1154279, EPI_ISL_1154284                                                                                               | SYNLAB MVZ Ettlingen                                                           | Robert Koch Institute                                                          | unknown                                                                                                                                                                                                                      |
| EPI_ISL_1154286                                                                                                                                                     | SYNLAB MVZ Leverkusen                                                          | Robert Koch Institute                                                          | unknown                                                                                                                                                                                                                      |
| EPI_ISL_1154287, EPI_ISL_1154291,<br>EPI_ISL_1154292, EPI_ISL_1154294,<br>EPI_ISL_1154295, EPI_ISL_1154297,<br>EPI_ISL_1154299, EPI_ISL_1154300,<br>EPI_ISL_1154301 | SYNLAB MVZ Ettlingen                                                           | Robert Koch Institute                                                          | unknown                                                                                                                                                                                                                      |
| EPI_ISL_1154302                                                                                                                                                     | SYNLAB MVZ Leverkusen                                                          | Robert Koch Institute                                                          | unknown                                                                                                                                                                                                                      |
| EPI_ISL_1154304, EPI_ISL_1154309,<br>EPI_ISL_1154311                                                                                                                | SYNLAB MVZ Ettlingen                                                           | Robert Koch Institute                                                          | unknown                                                                                                                                                                                                                      |
| EPI_ISL_1154313                                                                                                                                                     | SYNLAB MVZ Weiden                                                              | Robert Koch Institute                                                          | unknown                                                                                                                                                                                                                      |
| EPI_ISL_1154319, EPI_ISL_1154322                                                                                                                                    | SYNLAB MVZ Ettlingen                                                           | Robert Koch Institute                                                          | unknown                                                                                                                                                                                                                      |
| EPI_ISL_1154323                                                                                                                                                     | SYNLAB MVZ Weiden                                                              | Robert Koch Institute                                                          | unknown                                                                                                                                                                                                                      |
| EPI_ISL_1154324                                                                                                                                                     | SYNLAB MVZ Ettlingen                                                           | Robert Koch Institute                                                          | unknown                                                                                                                                                                                                                      |
| EPI_ISL_1154325                                                                                                                                                     | SYNLAB MVZ Leverkusen                                                          | Robert Koch Institute                                                          | unknown                                                                                                                                                                                                                      |
| EPI_ISL_1154330                                                                                                                                                     | SYNLAB MVZ Ettlingen                                                           | Robert Koch Institute                                                          | unknown                                                                                                                                                                                                                      |
| EPI_ISL_1154332                                                                                                                                                     | SYNLAB MVZ Leverkusen                                                          | Robert Koch Institute                                                          | unknown                                                                                                                                                                                                                      |
| EPI_ISL_1154333                                                                                                                                                     | SYNLAB MVZ Ettlingen                                                           | Robert Koch Institute                                                          | unknown                                                                                                                                                                                                                      |
| EPI_ISL_1154337                                                                                                                                                     | SYNLAB MVZ Hamburg                                                             | Robert Koch Institute                                                          | unknown                                                                                                                                                                                                                      |
| EPI_ISL_1154338, EPI_ISL_1154342                                                                                                                                    | SYNLAB MVZ Ettlingen                                                           | Robert Koch Institute                                                          | unknown                                                                                                                                                                                                                      |
| EPI_ISL_1154343                                                                                                                                                     | SYNLAB MVZ Leverkusen                                                          | Robert Koch Institute                                                          | unknown                                                                                                                                                                                                                      |
| EPI_ISL_1154348, EPI_ISL_1154349,<br>EPI_ISL_1154350                                                                                                                | SYNLAB MVZ Ettlingen                                                           | Robert Koch Institute                                                          | unknown                                                                                                                                                                                                                      |
| EPI_ISL_1154354                                                                                                                                                     | SYNLAB MVZ Leverkusen                                                          | Robert Koch Institute                                                          | unknown                                                                                                                                                                                                                      |
| EPI_ISL_1154355, EPI_ISL_1154356                                                                                                                                    | SYNLAB MVZ Ettlingen                                                           | Robert Koch Institute                                                          | unknown                                                                                                                                                                                                                      |
| EPI_ISL_1154357                                                                                                                                                     | SYNLAB MVZ Leverkusen                                                          | Robert Koch Institute                                                          | unknown                                                                                                                                                                                                                      |
| EPI_ISL_1154359                                                                                                                                                     | SYNLAB MVZ Ettlingen                                                           | Robert Koch Institute                                                          | unknown                                                                                                                                                                                                                      |
| EPI_ISL_1154361                                                                                                                                                     | Area Biologia Molecolare - Istituto Zooprofilattico Sperimentale della Sicilia | Area Biologia Molecolare - Istituto Zooprofilattico Sperimentale della Sicilia | REALE Stefano, SCIBETTA Silvia, PIAZZA Angela, BRUNO Gabriella, CASTELLI Germano, BRUNO Federica, VITALE Francesco, TRAMUTO Fabio, MAIDA Carmelo Massimo, MAZZUCCO Walter, DI NARO Daniela, RANDAZZO Giulia, VITALE Fabrizio |
| EPI_ISL_1154364, EPI_ISL_1154366                                                                                                                                    | SYNLAB MVZ Ettlingen                                                           | Robert Koch Institute                                                          | unknown                                                                                                                                                                                                                      |
| EPI_ISL_1154369                                                                                                                                                     | SYNLAB MVZ Leverkusen                                                          | Robert Koch Institute                                                          | unknown                                                                                                                                                                                                                      |
| EPI_ISL_1154371                                                                                                                                                     | SYNLAB MVZ Hamburg                                                             | Robert Koch Institute                                                          | unknown                                                                                                                                                                                                                      |
| EPI_ISL_1154373                                                                                                                                                     | SYNLAB MVZ Ettlingen                                                           | Robert Koch Institute                                                          | unknown                                                                                                                                                                                                                      |
| EPI_ISL_1154376                                                                                                                                                     | SYNLAB MVZ Leverkusen                                                          | Robert Koch Institute                                                          | unknown                                                                                                                                                                                                                      |
| EPI_ISL_1154378                                                                                                                                                     | SYNLAB MVZ Ettlingen                                                           | Robert Koch Institute                                                          | unknown                                                                                                                                                                                                                      |
| EPI_ISL_1154379, EPI_ISL_1154380                                                                                                                                    | SYNLAB MVZ Leverkusen                                                          | Robert Koch Institute                                                          | unknown                                                                                                                                                                                                                      |
| EPI_ISL_1154383, EPI_ISL_1154386                                                                                                                                    | SYNLAB MVZ Ettlingen                                                           | Robert Koch Institute                                                          | unknown                                                                                                                                                                                                                      |
| EPI_ISL_1154387                                                                                                                                                     | SYNLAB MVZ Leverkusen                                                          | Robert Koch Institute                                                          | unknown                                                                                                                                                                                                                      |
| EPI_ISL_1154388                                                                                                                                                     | SYNLAB MVZ Ettlingen                                                           | Robert Koch Institute                                                          | unknown                                                                                                                                                                                                                      |
| EPI_ISL_1154389                                                                                                                                                     | SYNLAB MVZ Hamburg                                                             | Robert Koch Institute                                                          | unknown                                                                                                                                                                                                                      |
| EPI_ISL_1154391                                                                                                                                                     | SYNLAB MVZ Berlin                                                              | Robert Koch Institute                                                          | unknown                                                                                                                                                                                                                      |
| EPI_ISL_1154392                                                                                                                                                     | SYNLAB MVZ Leverkusen                                                          | Robert Koch Institute                                                          | unknown                                                                                                                                                                                                                      |
| EPI_ISL_1154394, EPI_ISL_1154399,<br>EPI_ISL_1154406                                                                                                                | SYNLAB MVZ Ettlingen                                                           | Robert Koch Institute                                                          | unknown                                                                                                                                                                                                                      |
| EPI_ISL_1154407                                                                                                                                                     | SYNLAB MVZ Leverkusen                                                          | Robert Koch Institute                                                          | unknown                                                                                                                                                                                                                      |
| EPI_ISL_1154416                                                                                                                                                     | SYNLAB MVZ Ettlingen                                                           | Robert Koch Institute                                                          | unknown                                                                                                                                                                                                                      |
| EPI_ISL_1154417                                                                                                                                                     | SYNLAB MVZ Leverkusen                                                          | Robert Koch Institute                                                          | unknown                                                                                                                                                                                                                      |
| EPI_ISL_1154418                                                                                                                                                     | SYNLAB MVZ Hamburg                                                             | Robert Koch Institute                                                          | unknown                                                                                                                                                                                                                      |
| EPI_ISL_1154419, EPI_ISL_1154421                                                                                                                                    | SYNLAB MVZ Ettlingen                                                           | Robert Koch Institute                                                          | unknown                                                                                                                                                                                                                      |
| EPI_ISL_1154423                                                                                                                                                     | SYNLAB MVZ Leverkusen                                                          | Robert Koch Institute                                                          | unknown                                                                                                                                                                                                                      |
| EPI_ISL_1154424                                                                                                                                                     | SYNLAB MVZ Berlin                                                              | Robert Koch Institute                                                          | unknown                                                                                                                                                                                                                      |
| EPI_ISL_1154425                                                                                                                                                     | SYNLAB MVZ Ettlingen                                                           | Robert Koch Institute                                                          | unknown                                                                                                                                                                                                                      |

|                                                                    |                                                                                |                                                                                |                                                                                                                                                                                                                              |
|--------------------------------------------------------------------|--------------------------------------------------------------------------------|--------------------------------------------------------------------------------|------------------------------------------------------------------------------------------------------------------------------------------------------------------------------------------------------------------------------|
| EPI_ISL_1154426                                                    | SYNLAB MVZ Weiden                                                              | Robert Koch Institute                                                          | unknown                                                                                                                                                                                                                      |
| EPI_ISL_1154431                                                    | SYNLAB MVZ Leverkusen                                                          | Robert Koch Institute                                                          | unknown                                                                                                                                                                                                                      |
| EPI_ISL_1154438                                                    | SYNLAB MVZ Weiden                                                              | Robert Koch Institute                                                          | unknown                                                                                                                                                                                                                      |
| EPI_ISL_1154450                                                    | LabKom - Labor Hannover MVZ GmbH                                               | Robert Koch Institute                                                          | unknown                                                                                                                                                                                                                      |
| EPI_ISL_1154459                                                    | LabKom - Labor Mainz MVZ GmbH                                                  | Robert Koch Institute                                                          | unknown                                                                                                                                                                                                                      |
| EPI_ISL_1154466                                                    | LabKom - Labor an der Salzbrücke MVZ GmbH                                      | Robert Koch Institute                                                          | unknown                                                                                                                                                                                                                      |
| EPI_ISL_1154468                                                    | LabKom - Labor Hannover MVZ GmbH                                               | Robert Koch Institute                                                          | unknown                                                                                                                                                                                                                      |
| EPI_ISL_1154473                                                    | LabKom - Labor Mainz MVZ GmbH                                                  | Robert Koch Institute                                                          | unknown                                                                                                                                                                                                                      |
| EPI_ISL_1154475                                                    | Universitätsklinikum Frankfurt - Institut für Medizinische Virologie           | Robert Koch Institute                                                          | unknown                                                                                                                                                                                                                      |
| EPI_ISL_1154477                                                    | LabKom - Labor an der Salzbrücke MVZ GmbH                                      | Robert Koch Institute                                                          | unknown                                                                                                                                                                                                                      |
| EPI_ISL_1154496                                                    | Bioscientia Labor Wermsdorf                                                    | Robert Koch Institute                                                          | unknown                                                                                                                                                                                                                      |
| EPI_ISL_1154501                                                    | Sonic - Labor Dr. von Foreich GmbH                                             | Robert Koch Institute                                                          | unknown                                                                                                                                                                                                                      |
| EPI_ISL_1154508                                                    | LabKom - Labor Mainz MVZ GmbH                                                  | Robert Koch Institute                                                          | unknown                                                                                                                                                                                                                      |
| EPI_ISL_1154509                                                    | LabKom - Labor Hamburg-Lübeck                                                  | Robert Koch Institute                                                          | unknown                                                                                                                                                                                                                      |
| EPI_ISL_1154513                                                    | Sonic - Labor Dr. von Foreich GmbH                                             | Robert Koch Institute                                                          | unknown                                                                                                                                                                                                                      |
| EPI_ISL_1154515                                                    | LabKom - Labor Augsburg MVZ GmbH                                               | Robert Koch Institute                                                          | unknown                                                                                                                                                                                                                      |
| EPI_ISL_1154520                                                    | Sonic - Labor Dr. von Foreich GmbH                                             | Robert Koch Institute                                                          | unknown                                                                                                                                                                                                                      |
| EPI_ISL_1154523, EPI_ISL_1154530, EPI_ISL_1154544, EPI_ISL_1154549 | LabKom - Labor Hannover MVZ GmbH                                               | Robert Koch Institute                                                          | unknown                                                                                                                                                                                                                      |
| EPI_ISL_1154554                                                    | LabKom - Labor an der Salzbrücke MVZ GmbH                                      | Robert Koch Institute                                                          | unknown                                                                                                                                                                                                                      |
| EPI_ISL_1154559                                                    | LabKom - Labor Hannover MVZ GmbH                                               | Robert Koch Institute                                                          | unknown                                                                                                                                                                                                                      |
| EPI_ISL_1154566                                                    | LabKom - Labor an der Salzbrücke MVZ GmbH                                      | Robert Koch Institute                                                          | unknown                                                                                                                                                                                                                      |
| EPI_ISL_1154569                                                    | Sonic - Labor Dr. von Foreich GmbH                                             | Robert Koch Institute                                                          | unknown                                                                                                                                                                                                                      |
| EPI_ISL_1154581                                                    | LabKom - Labor Augsburg MVZ GmbH                                               | Robert Koch Institute                                                          | unknown                                                                                                                                                                                                                      |
| EPI_ISL_1154587                                                    | LabKom - Labor Mainz MVZ GmbH                                                  | Robert Koch Institute                                                          | unknown                                                                                                                                                                                                                      |
| EPI_ISL_1154591                                                    | Bioscientia Labor Wermsdorf                                                    | Robert Koch Institute                                                          | unknown                                                                                                                                                                                                                      |
| EPI_ISL_1154596                                                    | LabKom - Labor Hamburg-Lübeck                                                  | Robert Koch Institute                                                          | unknown                                                                                                                                                                                                                      |
| EPI_ISL_1154608                                                    | LabKom - Labor Mainz MVZ GmbH                                                  | Robert Koch Institute                                                          | unknown                                                                                                                                                                                                                      |
| EPI_ISL_1154627, EPI_ISL_1154635                                   | LabKom - Labor an der Salzbrücke MVZ GmbH                                      | Robert Koch Institute                                                          | unknown                                                                                                                                                                                                                      |
| EPI_ISL_1154636                                                    | LabKom - Labor Augsburg MVZ GmbH                                               | Robert Koch Institute                                                          | unknown                                                                                                                                                                                                                      |
| EPI_ISL_1154638                                                    | LabKom - Labor an der Salzbrücke MVZ GmbH                                      | Robert Koch Institute                                                          | unknown                                                                                                                                                                                                                      |
| EPI_ISL_1154640, EPI_ISL_1154646                                   | LabKom - Labor Hannover MVZ GmbH                                               | Robert Koch Institute                                                          | unknown                                                                                                                                                                                                                      |
| EPI_ISL_1154647                                                    | LabKom - Labor Mainz MVZ GmbH                                                  | Robert Koch Institute                                                          | unknown                                                                                                                                                                                                                      |
| EPI_ISL_1154653                                                    | Bioscientia Labor Wermsdorf                                                    | Robert Koch Institute                                                          | unknown                                                                                                                                                                                                                      |
| EPI_ISL_1154666, EPI_ISL_1154670                                   | LabKom - Labor Augsburg MVZ GmbH                                               | Robert Koch Institute                                                          | unknown                                                                                                                                                                                                                      |
| EPI_ISL_1154699                                                    | Bioscientia Labor Wermsdorf                                                    | Robert Koch Institute                                                          | unknown                                                                                                                                                                                                                      |
| EPI_ISL_1154701                                                    | Sonic - Labor Dr. von Foreich GmbH                                             | Robert Koch Institute                                                          | unknown                                                                                                                                                                                                                      |
| EPI_ISL_1154707                                                    | LabKom - Labor Augsburg MVZ GmbH                                               | Robert Koch Institute                                                          | unknown                                                                                                                                                                                                                      |
| EPI_ISL_1154719                                                    | Bioscientia Labor Wermsdorf                                                    | Robert Koch Institute                                                          | unknown                                                                                                                                                                                                                      |
| EPI_ISL_1154723, EPI_ISL_1154727                                   | LabKom - Labor Augsburg MVZ GmbH                                               | Robert Koch Institute                                                          | unknown                                                                                                                                                                                                                      |
| EPI_ISL_1154729                                                    | Sonic - Labor Dr. von Foreich GmbH                                             | Robert Koch Institute                                                          | unknown                                                                                                                                                                                                                      |
| EPI_ISL_1154733                                                    | LabKom - Labor Augsburg MVZ GmbH                                               | Robert Koch Institute                                                          | unknown                                                                                                                                                                                                                      |
| EPI_ISL_1154744, EPI_ISL_1154745                                   | LabKom - Labor an der Salzbrücke MVZ GmbH                                      | Robert Koch Institute                                                          | unknown                                                                                                                                                                                                                      |
| EPI_ISL_1154752                                                    | LabKom - Labor Mainz MVZ GmbH                                                  | Robert Koch Institute                                                          | unknown                                                                                                                                                                                                                      |
| EPI_ISL_1154759                                                    | Bioscientia Labor Wermsdorf                                                    | Robert Koch Institute                                                          | unknown                                                                                                                                                                                                                      |
| EPI_ISL_1154766                                                    | Sonic - Labor Staber MVZ Kassel                                                | Robert Koch Institute                                                          | unknown                                                                                                                                                                                                                      |
| EPI_ISL_1154768                                                    | LabKom - Labor Hamburg-Lübeck                                                  | Robert Koch Institute                                                          | unknown                                                                                                                                                                                                                      |
| EPI_ISL_1154771                                                    | Bioscientia Labor Wermsdorf                                                    | Robert Koch Institute                                                          | unknown                                                                                                                                                                                                                      |
| EPI_ISL_1154773                                                    | LabKom - Labor Hannover MVZ GmbH                                               | Robert Koch Institute                                                          | unknown                                                                                                                                                                                                                      |
| EPI_ISL_1154775, EPI_ISL_1154777                                   | Bioscientia Labor Wermsdorf                                                    | Robert Koch Institute                                                          | unknown                                                                                                                                                                                                                      |
| EPI_ISL_1154825, EPI_ISL_1154833                                   | Sonic - MVZ Medizinisches Labor Bremen GmbH                                    | Robert Koch Institute                                                          | unknown                                                                                                                                                                                                                      |
| EPI_ISL_1154841                                                    | Labor 28 MVZ GmbH                                                              | Robert Koch Institute                                                          | unknown                                                                                                                                                                                                                      |
| EPI_ISL_1154845                                                    | Bioscientia Labor Wermsdorf                                                    | Robert Koch Institute                                                          | unknown                                                                                                                                                                                                                      |
| EPI_ISL_1154849                                                    | Sonic - Bioscientia - MVZ Labor Saar GmbH                                      | Robert Koch Institute                                                          | unknown                                                                                                                                                                                                                      |
| EPI_ISL_1154857                                                    | Universitätsklinikum Frankfurt - Institut für Medizinische Virologie           | Robert Koch Institute                                                          | unknown                                                                                                                                                                                                                      |
| EPI_ISL_1154873, EPI_ISL_1154881                                   | Bioscientia Labor Wermsdorf                                                    | Robert Koch Institute                                                          | unknown                                                                                                                                                                                                                      |
| EPI_ISL_1154890                                                    | Area Biologia Molecolare - Istituto Zooprofilattico Sperimentale della Sicilia | Area Biologia Molecolare - Istituto Zooprofilattico Sperimentale della Sicilia | REALE Stefano, SCIBETTA Silvia, PIAZZA Angela, BRUNO Gabriella, CASTELLI Germano, BRUNO Federica, VITALE Francesco, TRAMUTO Fabio, MAIDA Carmelo Massimo, MAZZUCCO Walter, DI NARO Daniela, RANDAZZO Giulia, VITALE Fabrizio |



|                                                                                                                                                                                                                                                                                                                                                                                                       |                                                                                                            |                       |         |
|-------------------------------------------------------------------------------------------------------------------------------------------------------------------------------------------------------------------------------------------------------------------------------------------------------------------------------------------------------------------------------------------------------|------------------------------------------------------------------------------------------------------------|-----------------------|---------|
| EPI_ISL_1154898                                                                                                                                                                                                                                                                                                                                                                                       | Sonic - MVZ Medizinisches Labor Bremen GmbH                                                                | Robert Koch Institute | unknown |
| EPI_ISL_1154899, EPI_ISL_1154900                                                                                                                                                                                                                                                                                                                                                                      | Bioscientia Labor Wermsdorf                                                                                | Robert Koch Institute | unknown |
| EPI_ISL_1154931                                                                                                                                                                                                                                                                                                                                                                                       | LabKom - MVZ Labor Bochum MLB GmbH                                                                         | Robert Koch Institute | unknown |
| EPI_ISL_1154974                                                                                                                                                                                                                                                                                                                                                                                       | Bioscientia Labor Wermsdorf                                                                                | Robert Koch Institute | unknown |
| EPI_ISL_1154995                                                                                                                                                                                                                                                                                                                                                                                       | Labor 28 MVZ GmbH                                                                                          | Robert Koch Institute | unknown |
| EPI_ISL_1155014                                                                                                                                                                                                                                                                                                                                                                                       | Bioscientia Labor Wermsdorf                                                                                | Robert Koch Institute | unknown |
| EPI_ISL_1155049                                                                                                                                                                                                                                                                                                                                                                                       | Sonic - Bioscientia - MVZ Labor Saar GmbH                                                                  | Robert Koch Institute | unknown |
| EPI_ISL_1155059                                                                                                                                                                                                                                                                                                                                                                                       | Bioscientia Labor Wermsdorf                                                                                | Robert Koch Institute | unknown |
| EPI_ISL_1155070                                                                                                                                                                                                                                                                                                                                                                                       | Labor 28 MVZ GmbH                                                                                          | Robert Koch Institute | unknown |
| EPI_ISL_1155103                                                                                                                                                                                                                                                                                                                                                                                       | Bioscientia Labor Wermsdorf                                                                                | Robert Koch Institute | unknown |
| EPI_ISL_1155110                                                                                                                                                                                                                                                                                                                                                                                       | Sonic - Bioscientia - MVZ Labor Saar GmbH                                                                  | Robert Koch Institute | unknown |
| EPI_ISL_1155113                                                                                                                                                                                                                                                                                                                                                                                       | Sonic - MVZ Medizinisches Labor Bremen GmbH                                                                | Robert Koch Institute | unknown |
| EPI_ISL_1155121                                                                                                                                                                                                                                                                                                                                                                                       | Bioscientia Labor Wermsdorf                                                                                | Robert Koch Institute | unknown |
| EPI_ISL_1155202, EPI_ISL_1155204, EPI_ISL_1155205, EPI_ISL_1155208, EPI_ISL_1155209, EPI_ISL_1155210, EPI_ISL_1155211, EPI_ISL_1155213, EPI_ISL_1155215, EPI_ISL_1155216, EPI_ISL_1155218, EPI_ISL_1155219, EPI_ISL_1155220, EPI_ISL_1155221, EPI_ISL_1155223, EPI_ISL_1155225, EPI_ISL_1155226, EPI_ISL_1155227, EPI_ISL_1155228, EPI_ISL_1155230, EPI_ISL_1155231, EPI_ISL_1155232, EPI_ISL_1155233 |                                                                                                            |                       |         |
| see above                                                                                                                                                                                                                                                                                                                                                                                             | Dianovis GmbH Greiz                                                                                        | Robert Koch Institute | unknown |
| EPI_ISL_1155329, EPI_ISL_1155330, EPI_ISL_1155331, EPI_ISL_1155332, EPI_ISL_1155333                                                                                                                                                                                                                                                                                                                   | Uniklinikum Regensburg; Institut für Mikrobiologie                                                         | Robert Koch Institute | unknown |
| EPI_ISL_1155334, EPI_ISL_1155335, EPI_ISL_1155337, EPI_ISL_1155338, EPI_ISL_1155339, EPI_ISL_1155340, EPI_ISL_1155343, EPI_ISL_1155356, EPI_ISL_1155359, EPI_ISL_1155362, EPI_ISL_1155363, EPI_ISL_1155364, EPI_ISL_1155367, EPI_ISL_1155368, EPI_ISL_1155372, EPI_ISL_1155374, EPI_ISL_1155376, EPI_ISL_1155377, EPI_ISL_1155379, EPI_ISL_1155380                                                    |                                                                                                            |                       |         |
| see above                                                                                                                                                                                                                                                                                                                                                                                             | Med. Labor Prof. Schenk Dr. Ansorge & Kollegen                                                             | Robert Koch Institute | unknown |
| EPI_ISL_1155576, EPI_ISL_1155581, EPI_ISL_1155596, EPI_ISL_1155617, EPI_ISL_1155622, EPI_ISL_1155624                                                                                                                                                                                                                                                                                                  | SYNLAB MVZ Weiden                                                                                          | Robert Koch Institute | unknown |
| EPI_ISL_1155625                                                                                                                                                                                                                                                                                                                                                                                       | SYNLAB MVZ Berlin                                                                                          | Robert Koch Institute | unknown |
| EPI_ISL_1155629, EPI_ISL_1155640, EPI_ISL_1155654                                                                                                                                                                                                                                                                                                                                                     | SYNLAB MVZ Weiden                                                                                          | Robert Koch Institute | unknown |
| EPI_ISL_1155666                                                                                                                                                                                                                                                                                                                                                                                       | SYNLAB MVZ Leinfelden-Echterdingen                                                                         | Robert Koch Institute | unknown |
| EPI_ISL_1155670, EPI_ISL_1155675, EPI_ISL_1155676                                                                                                                                                                                                                                                                                                                                                     | SYNLAB MVZ Weiden                                                                                          | Robert Koch Institute | unknown |
| EPI_ISL_1155681                                                                                                                                                                                                                                                                                                                                                                                       | SYNLAB MVZ Heidelberg                                                                                      | Robert Koch Institute | unknown |
| EPI_ISL_1155684                                                                                                                                                                                                                                                                                                                                                                                       | SYNLAB MVZ Weiden                                                                                          | Robert Koch Institute | unknown |
| EPI_ISL_1155692                                                                                                                                                                                                                                                                                                                                                                                       | SYNLAB MVZ Leinfelden-Echterdingen                                                                         | Robert Koch Institute | unknown |
| EPI_ISL_1155696, EPI_ISL_1155707, EPI_ISL_1155719, EPI_ISL_1155731, EPI_ISL_1155746                                                                                                                                                                                                                                                                                                                   | SYNLAB MVZ Weiden                                                                                          | Robert Koch Institute | unknown |
| EPI_ISL_1155753                                                                                                                                                                                                                                                                                                                                                                                       | SYNLAB MVZ Berlin                                                                                          | Robert Koch Institute | unknown |
| EPI_ISL_1155763                                                                                                                                                                                                                                                                                                                                                                                       | SYNLAB MVZ Weiden                                                                                          | Robert Koch Institute | unknown |
| EPI_ISL_1155777                                                                                                                                                                                                                                                                                                                                                                                       | SYNLAB MVZ Heidelberg                                                                                      | Robert Koch Institute | unknown |
| EPI_ISL_1155783, EPI_ISL_1155784                                                                                                                                                                                                                                                                                                                                                                      | SYNLAB MVZ Weiden                                                                                          | Robert Koch Institute | unknown |
| EPI_ISL_1155790                                                                                                                                                                                                                                                                                                                                                                                       | SYNLAB MVZ Berlin                                                                                          | Robert Koch Institute | unknown |
| EPI_ISL_1155796                                                                                                                                                                                                                                                                                                                                                                                       | SYNLAB MVZ Leinfelden-Echterdingen                                                                         | Robert Koch Institute | unknown |
| EPI_ISL_1155799, EPI_ISL_1155806                                                                                                                                                                                                                                                                                                                                                                      | SYNLAB MVZ Weiden                                                                                          | Robert Koch Institute | unknown |
| EPI_ISL_1155809                                                                                                                                                                                                                                                                                                                                                                                       | SYNLAB MVZ Leinfelden-Echterdingen                                                                         | Robert Koch Institute | unknown |
| EPI_ISL_1155812, EPI_ISL_1155814, EPI_ISL_1155817                                                                                                                                                                                                                                                                                                                                                     | SYNLAB MVZ Weiden                                                                                          | Robert Koch Institute | unknown |
| EPI_ISL_1155852                                                                                                                                                                                                                                                                                                                                                                                       | SYNLAB MVZ Leinfelden-Echterdingen                                                                         | Robert Koch Institute | unknown |
| EPI_ISL_1155853                                                                                                                                                                                                                                                                                                                                                                                       | SYNLAB MVZ Trier                                                                                           | Robert Koch Institute | unknown |
| EPI_ISL_1155854, EPI_ISL_1155857, EPI_ISL_1155863, EPI_ISL_1155864, EPI_ISL_1155867, EPI_ISL_1155879                                                                                                                                                                                                                                                                                                  | SYNLAB MVZ Weiden                                                                                          | Robert Koch Institute | unknown |
| EPI_ISL_1155885                                                                                                                                                                                                                                                                                                                                                                                       | SYNLAB MVZ Leinfelden-Echterdingen                                                                         | Robert Koch Institute | unknown |
| EPI_ISL_1155894, EPI_ISL_1155905                                                                                                                                                                                                                                                                                                                                                                      | SYNLAB MVZ Weiden                                                                                          | Robert Koch Institute | unknown |
| EPI_ISL_1155946                                                                                                                                                                                                                                                                                                                                                                                       | Universitätsklinikum Leipzig - Institut für Medizinische Mikrobiologie und Virologie virologisches Labor   | Robert Koch Institute | unknown |
| EPI_ISL_1155995, EPI_ISL_1155996                                                                                                                                                                                                                                                                                                                                                                      | Praxisgemeinschaft für Laboratoriumsmedizin Labor Blumenstraße; Praxis Dr. Sel und Dr. Späte               | Robert Koch Institute | unknown |
| EPI_ISL_1155997                                                                                                                                                                                                                                                                                                                                                                                       | Praxisgemeinschaft für Laboratoriumsmedizin Labor Blumenstraße; Praxis Dr. E. Wietschel & Dr. F. Wietschel | Robert Koch Institute | unknown |
| EPI_ISL_1156000                                                                                                                                                                                                                                                                                                                                                                                       | Praxisgemeinschaft für Laboratoriumsmedizin Labor Blumenstraße; Praxis Dr. Sel und Dr. Späte               | Robert Koch Institute | unknown |
| EPI_ISL_1156237, EPI_ISL_1156318                                                                                                                                                                                                                                                                                                                                                                      | Diagnosticum - Labor Neukirchen                                                                            | Robert Koch Institute | unknown |
| EPI_ISL_1156362, EPI_ISL_1156363, EPI_ISL_1156364, EPI_ISL_1156366,                                                                                                                                                                                                                                                                                                                                   | Chemische und Veterinäruntersuchungsamt Münsterland-Emscher-Lippe                                          | Robert Koch Institute | unknown |

|                                                                                                                                        |                                                                                                                  |                       |         |
|----------------------------------------------------------------------------------------------------------------------------------------|------------------------------------------------------------------------------------------------------------------|-----------------------|---------|
| EPI_ISL_1156368, EPI_ISL_1156369                                                                                                       |                                                                                                                  |                       |         |
| EPI_ISL_1156371, EPI_ISL_1156372, EPI_ISL_1156373                                                                                      | LADR MVZ Zweigpraxis Bernau                                                                                      | Robert Koch Institute | unknown |
| EPI_ISL_1156374                                                                                                                        | IMD - MVZ Labor Greifswald                                                                                       | Robert Koch Institute | unknown |
| EPI_ISL_1156375                                                                                                                        | LADR MVZ Zweigpraxis Bernau                                                                                      | Robert Koch Institute | unknown |
| EPI_ISL_1156376                                                                                                                        | IMD - Labor Oderland                                                                                             | Robert Koch Institute | unknown |
| EPI_ISL_1156377, EPI_ISL_1156378, EPI_ISL_1156379                                                                                      | IMD - MVZ Labor Greifswald                                                                                       | Robert Koch Institute | unknown |
| EPI_ISL_1156380, EPI_ISL_1156381, EPI_ISL_1156382                                                                                      | IMD - Institut für Medizinische Diagnostik Berlin-Potsdam                                                        | Robert Koch Institute | unknown |
| EPI_ISL_1156383                                                                                                                        | IMD - MVZ Labor Greifswald                                                                                       | Robert Koch Institute | unknown |
| EPI_ISL_1156384                                                                                                                        | LADR MVZ Zweigpraxis Bernau                                                                                      | Robert Koch Institute | unknown |
| EPI_ISL_1156385                                                                                                                        | IMD - Labor Oderland                                                                                             | Robert Koch Institute | unknown |
| EPI_ISL_1156386                                                                                                                        | IMD - Institut für Medizinische Diagnostik Berlin-Potsdam                                                        | Robert Koch Institute | unknown |
| EPI_ISL_1156387                                                                                                                        | IMD - MVZ Labor Greifswald                                                                                       | Robert Koch Institute | unknown |
| EPI_ISL_1156388                                                                                                                        | IMD - Institut für Medizinische Diagnostik Berlin-Potsdam                                                        | Robert Koch Institute | unknown |
| EPI_ISL_1156389, EPI_ISL_1156390                                                                                                       | LADR MVZ Zweigpraxis Bernau                                                                                      | Robert Koch Institute | unknown |
| EPI_ISL_1156391                                                                                                                        | IMD - MVZ Labor Greifswald                                                                                       | Robert Koch Institute | unknown |
| EPI_ISL_1156392                                                                                                                        | IMD - Institut für Medizinische Diagnostik Berlin-Potsdam                                                        | Robert Koch Institute | unknown |
| EPI_ISL_1156394, EPI_ISL_1156395, EPI_ISL_1156396                                                                                      | LADR MVZ Zweigpraxis Bernau                                                                                      | Robert Koch Institute | unknown |
| EPI_ISL_1156397, EPI_ISL_1156398, EPI_ISL_1156399                                                                                      | IMD - MVZ Labor Greifswald                                                                                       | Robert Koch Institute | unknown |
| EPI_ISL_1156400                                                                                                                        | IMD - Labor Oderland                                                                                             | Robert Koch Institute | unknown |
| EPI_ISL_1156401, EPI_ISL_1156402                                                                                                       | LADR MVZ Zweigpraxis Bernau                                                                                      | Robert Koch Institute | unknown |
| EPI_ISL_1156403                                                                                                                        | IMD - MVZ Labor Greifswald                                                                                       | Robert Koch Institute | unknown |
| EPI_ISL_1156404, EPI_ISL_1156405, EPI_ISL_1156406, EPI_ISL_1156407, EPI_ISL_1156408, EPI_ISL_1156409, EPI_ISL_1156410, EPI_ISL_1156411 | LADR MVZ Zweigpraxis Bernau                                                                                      | Robert Koch Institute | unknown |
| EPI_ISL_1156412                                                                                                                        | IMD - MVZ Labor Greifswald                                                                                       | Robert Koch Institute | unknown |
| EPI_ISL_1156413, EPI_ISL_1156414                                                                                                       | LADR MVZ Zweigpraxis Bernau                                                                                      | Robert Koch Institute | unknown |
| EPI_ISL_1156415                                                                                                                        | IMD - Labor Oderland                                                                                             | Robert Koch Institute | unknown |
| EPI_ISL_1156416                                                                                                                        | IMD - MVZ Labor Greifswald                                                                                       | Robert Koch Institute | unknown |
| EPI_ISL_1156418                                                                                                                        | LADR MVZ Zweigpraxis Bernau                                                                                      | Robert Koch Institute | unknown |
| EPI_ISL_1156419                                                                                                                        | IMD - Labor Oderland                                                                                             | Robert Koch Institute | unknown |
| EPI_ISL_1156420                                                                                                                        | IMD - MVZ Labor Greifswald                                                                                       | Robert Koch Institute | unknown |
| EPI_ISL_1156421, EPI_ISL_1156422                                                                                                       | LADR MVZ Zweigpraxis Bernau                                                                                      | Robert Koch Institute | unknown |
| EPI_ISL_1156423                                                                                                                        | IMD - MVZ Labor Greifswald                                                                                       | Robert Koch Institute | unknown |
| EPI_ISL_1156424, EPI_ISL_1156425                                                                                                       | LADR MVZ Zweigpraxis Bernau                                                                                      | Robert Koch Institute | unknown |
| EPI_ISL_1156426                                                                                                                        | IMD - Labor Oderland                                                                                             | Robert Koch Institute | unknown |
| EPI_ISL_1156427, EPI_ISL_1156428                                                                                                       | IMD - MVZ Labor Greifswald                                                                                       | Robert Koch Institute | unknown |
| EPI_ISL_1156429, EPI_ISL_1156430                                                                                                       | IMD - Labor Oderland                                                                                             | Robert Koch Institute | unknown |
| EPI_ISL_1156431, EPI_ISL_1156432                                                                                                       | LADR MVZ Zweigpraxis Bernau                                                                                      | Robert Koch Institute | unknown |
| EPI_ISL_1156433                                                                                                                        | IMD - MVZ Labor Greifswald                                                                                       | Robert Koch Institute | unknown |
| EPI_ISL_1156434                                                                                                                        | LADR MVZ Zweigpraxis Bernau                                                                                      | Robert Koch Institute | unknown |
| EPI_ISL_1156435, EPI_ISL_1156436                                                                                                       | IMD - Labor Oderland                                                                                             | Robert Koch Institute | unknown |
| EPI_ISL_1156437, EPI_ISL_1156438                                                                                                       | LADR MVZ Zweigpraxis Bernau                                                                                      | Robert Koch Institute | unknown |
| EPI_ISL_1156439                                                                                                                        | IMD - MVZ Labor Greifswald                                                                                       | Robert Koch Institute | unknown |
| EPI_ISL_1156440                                                                                                                        | LADR MVZ Zweigpraxis Bernau                                                                                      | Robert Koch Institute | unknown |
| EPI_ISL_1156441                                                                                                                        | IMD - MVZ Labor Greifswald                                                                                       | Robert Koch Institute | unknown |
| EPI_ISL_1156442                                                                                                                        | IMD - Institut für Medizinische Diagnostik Berlin-Potsdam                                                        | Robert Koch Institute | unknown |
| EPI_ISL_1156443, EPI_ISL_1156444                                                                                                       | LADR MVZ Zweigpraxis Bernau                                                                                      | Robert Koch Institute | unknown |
| EPI_ISL_1156510                                                                                                                        | St. Georg Klinikum Eisenach gGmbH                                                                                | Robert Koch Institute | unknown |
| EPI_ISL_1156535                                                                                                                        | Sonic - Labor Dr. von Froreich GmbH                                                                              | Robert Koch Institute | unknown |
| EPI_ISL_1156643                                                                                                                        | LabKom - MVZ Labor Bochum MLB GmbH                                                                               | Robert Koch Institute | unknown |
| EPI_ISL_1156709                                                                                                                        | Bioscientia Labor Wermisdorf                                                                                     | Robert Koch Institute | unknown |
| EPI_ISL_1156753                                                                                                                        | Gesundheitszentrum Brandenburg an der Havel GmbH bzw. Institut für Laboratoriumsmedizin Brandenburg an der Havel | Robert Koch Institute | unknown |
| EPI_ISL_1156757                                                                                                                        | Sonic - MVZ Medizinisches Labor Bremen GmbH                                                                      | Robert Koch Institute | unknown |
| EPI_ISL_1156808                                                                                                                        | amedes MVZ für Laboratoriumsdiagnostik Raubling GmbH                                                             | Robert Koch Institute | unknown |
| EPI_ISL_1156809                                                                                                                        | amedes MVZ für Laboratoriumsmedizin Rhein/Ruhr                                                                   | Robert Koch Institute | unknown |

|                                                                                                                                                                                                                                                                                                                                                                                                                                                                                                                                                                   |                                                                         |                       |         |
|-------------------------------------------------------------------------------------------------------------------------------------------------------------------------------------------------------------------------------------------------------------------------------------------------------------------------------------------------------------------------------------------------------------------------------------------------------------------------------------------------------------------------------------------------------------------|-------------------------------------------------------------------------|-----------------------|---------|
| EPI_ISL_1156826                                                                                                                                                                                                                                                                                                                                                                                                                                                                                                                                                   | amedes MVZ DIAMEDIS Sennestadt                                          | Robert Koch Institute | unknown |
| EPI_ISL_1156838                                                                                                                                                                                                                                                                                                                                                                                                                                                                                                                                                   | amedes MVZ für Laboratoriumsmedizin Rhein/Ruhr                          | Robert Koch Institute | unknown |
| EPI_ISL_1156856                                                                                                                                                                                                                                                                                                                                                                                                                                                                                                                                                   | amedes MVZ DIAMEDIS Sennestadt                                          | Robert Koch Institute | unknown |
| EPI_ISL_1156868                                                                                                                                                                                                                                                                                                                                                                                                                                                                                                                                                   | amedes MVZ für Laboratoriumsdiagnostik Raubling GmbH                    | Robert Koch Institute | unknown |
| EPI_ISL_1156887                                                                                                                                                                                                                                                                                                                                                                                                                                                                                                                                                   | amedes MVZ für Labordiagnostik Rhein-Main                               | Robert Koch Institute | unknown |
| EPI_ISL_1156888, EPI_ISL_1156900,<br>EPI_ISL_1156903, EPI_ISL_1156911,<br>EPI_ISL_1156913                                                                                                                                                                                                                                                                                                                                                                                                                                                                         | amedes MVZ DIAMEDIS Sennestadt                                          | Robert Koch Institute | unknown |
| EPI_ISL_1156928                                                                                                                                                                                                                                                                                                                                                                                                                                                                                                                                                   | amedes MVZ Hannover                                                     | Robert Koch Institute | unknown |
| EPI_ISL_1156929, EPI_ISL_1156935                                                                                                                                                                                                                                                                                                                                                                                                                                                                                                                                  | amedes MVZ DIAMEDIS Sennestadt                                          | Robert Koch Institute | unknown |
| EPI_ISL_1156936                                                                                                                                                                                                                                                                                                                                                                                                                                                                                                                                                   | amedes MVZ Halle/Leipzig                                                | Robert Koch Institute | unknown |
| EPI_ISL_1156937, EPI_ISL_1156938                                                                                                                                                                                                                                                                                                                                                                                                                                                                                                                                  | amedes MVZ DIAMEDIS Sennestadt                                          | Robert Koch Institute | unknown |
| EPI_ISL_1156945, EPI_ISL_1156946                                                                                                                                                                                                                                                                                                                                                                                                                                                                                                                                  | amedes MVZ Hannover                                                     | Robert Koch Institute | unknown |
| EPI_ISL_1156975, EPI_ISL_1156977                                                                                                                                                                                                                                                                                                                                                                                                                                                                                                                                  | Labor Dr. Heidrich & Kollegen MVZ GmbH Hamburg                          | Robert Koch Institute | unknown |
| EPI_ISL_1156978                                                                                                                                                                                                                                                                                                                                                                                                                                                                                                                                                   | Medizinisch-Diagnostisches Labor Kempten allgäulab                      | Robert Koch Institute | unknown |
| EPI_ISL_1156979                                                                                                                                                                                                                                                                                                                                                                                                                                                                                                                                                   | Labor Dr. Heidrich & Kollegen MVZ GmbH Hamburg                          | Robert Koch Institute | unknown |
| EPI_ISL_1156983                                                                                                                                                                                                                                                                                                                                                                                                                                                                                                                                                   | Medizinisch-Diagnostisches Labor Kempten allgäulab                      | Robert Koch Institute | unknown |
| EPI_ISL_1156984                                                                                                                                                                                                                                                                                                                                                                                                                                                                                                                                                   | Labor Dr. Heidrich & Kollegen MVZ GmbH Hamburg                          | Robert Koch Institute | unknown |
| EPI_ISL_1156992                                                                                                                                                                                                                                                                                                                                                                                                                                                                                                                                                   | Medizinisch-Diagnostisches Labor Kempten allgäulab                      | Robert Koch Institute | unknown |
| EPI_ISL_1156994                                                                                                                                                                                                                                                                                                                                                                                                                                                                                                                                                   | Labor Dr. Heidrich & Kollegen MVZ GmbH Hamburg                          | Robert Koch Institute | unknown |
| EPI_ISL_1156995, EPI_ISL_1156996,<br>EPI_ISL_1156997                                                                                                                                                                                                                                                                                                                                                                                                                                                                                                              | Medizinisch-Diagnostisches Labor Kempten allgäulab                      | Robert Koch Institute | unknown |
| EPI_ISL_1156999, EPI_ISL_1157000                                                                                                                                                                                                                                                                                                                                                                                                                                                                                                                                  | Labor Dr. Heidrich & Kollegen MVZ GmbH Hamburg                          | Robert Koch Institute | unknown |
| EPI_ISL_1157001, EPI_ISL_1157003                                                                                                                                                                                                                                                                                                                                                                                                                                                                                                                                  | Medizinisch-Diagnostisches Labor Kempten allgäulab                      | Robert Koch Institute | unknown |
| EPI_ISL_1157014                                                                                                                                                                                                                                                                                                                                                                                                                                                                                                                                                   | Labor Dr. Heidrich & Kollegen MVZ GmbH Hamburg                          | Robert Koch Institute | unknown |
| EPI_ISL_1157016, EPI_ISL_1157019,<br>EPI_ISL_1157023, EPI_ISL_1157026,<br>EPI_ISL_1157030, EPI_ISL_1157032,<br>EPI_ISL_1157034                                                                                                                                                                                                                                                                                                                                                                                                                                    | Medizinisch-Diagnostisches Labor Kempten allgäulab                      | Robert Koch Institute | unknown |
| EPI_ISL_1157037, EPI_ISL_1157046                                                                                                                                                                                                                                                                                                                                                                                                                                                                                                                                  | Labor Dr. Heidrich & Kollegen MVZ GmbH Hamburg                          | Robert Koch Institute | unknown |
| EPI_ISL_1157048, EPI_ISL_1157049,<br>EPI_ISL_1157050                                                                                                                                                                                                                                                                                                                                                                                                                                                                                                              | Medizinisch-Diagnostisches Labor Kempten allgäulab                      | Robert Koch Institute | unknown |
| EPI_ISL_1157051                                                                                                                                                                                                                                                                                                                                                                                                                                                                                                                                                   | Labor Dr. Heidrich & Kollegen MVZ GmbH Hamburg                          | Robert Koch Institute | unknown |
| EPI_ISL_1157053                                                                                                                                                                                                                                                                                                                                                                                                                                                                                                                                                   | Medizinisch-Diagnostisches Labor Kempten allgäulab                      | Robert Koch Institute | unknown |
| EPI_ISL_1157054, EPI_ISL_1157055                                                                                                                                                                                                                                                                                                                                                                                                                                                                                                                                  | Labor Dr. Heidrich & Kollegen MVZ GmbH Hamburg                          | Robert Koch Institute | unknown |
| EPI_ISL_1157101, EPI_ISL_1157104,<br>EPI_ISL_1157108, EPI_ISL_1157113,<br>EPI_ISL_1157115                                                                                                                                                                                                                                                                                                                                                                                                                                                                         | Chemische und Veterinäruntersuchungsamt<br>Münsterland-Emscher-Lippe    | Robert Koch Institute | unknown |
| EPI_ISL_1157168, EPI_ISL_1157169, EPI_ISL_1157171, EPI_ISL_1157172, EPI_ISL_1157173, EPI_ISL_1157174, EPI_ISL_1157175, EPI_ISL_1157176, EPI_ISL_1157177, EPI_ISL_1157178, EPI_ISL_1157179, EPI_ISL_1157181, EPI_ISL_1157182, EPI_ISL_1157183, EPI_ISL_1157185, EPI_ISL_1157186, EPI_ISL_1157187,<br>EPI_ISL_1157188, EPI_ISL_1157189, EPI_ISL_1157190, EPI_ISL_1157191, EPI_ISL_1157192, EPI_ISL_1157193, EPI_ISL_1157194, EPI_ISL_1157195, EPI_ISL_1157196, EPI_ISL_1157197, EPI_ISL_1157198, EPI_ISL_1157199, EPI_ISL_1157201, EPI_ISL_1157202, EPI_ISL_1157203 |                                                                         |                       |         |
| see above                                                                                                                                                                                                                                                                                                                                                                                                                                                                                                                                                         | Limbach - MVZ Humangenetik Ulm                                          | Robert Koch Institute | unknown |
| EPI_ISL_1157204                                                                                                                                                                                                                                                                                                                                                                                                                                                                                                                                                   | Städtisches Klinikum Dresden                                            | Robert Koch Institute | unknown |
| EPI_ISL_1157206, EPI_ISL_1157208                                                                                                                                                                                                                                                                                                                                                                                                                                                                                                                                  | Uniklinikum Carl Gustav Carus an der TU Dresden; Institut für Virologie | Robert Koch Institute | unknown |
| EPI_ISL_1157210                                                                                                                                                                                                                                                                                                                                                                                                                                                                                                                                                   | Medizinisches Labor Ostsachsen MVZ<br>GbR Nebenbetriebsstätte Dresden   | Robert Koch Institute | unknown |
| EPI_ISL_1157211                                                                                                                                                                                                                                                                                                                                                                                                                                                                                                                                                   | Uniklinikum Carl Gustav Carus an der TU Dresden; Institut für Virologie | Robert Koch Institute | unknown |
| EPI_ISL_1157213, EPI_ISL_1157214                                                                                                                                                                                                                                                                                                                                                                                                                                                                                                                                  | Städtisches Klinikum Dresden                                            | Robert Koch Institute | unknown |
| EPI_ISL_1157215, EPI_ISL_1157218                                                                                                                                                                                                                                                                                                                                                                                                                                                                                                                                  | Uniklinikum Carl Gustav Carus an der TU Dresden; Institut für Virologie | Robert Koch Institute | unknown |
| EPI_ISL_1157221                                                                                                                                                                                                                                                                                                                                                                                                                                                                                                                                                   | Oberlausitz Kliniken gGmbH                                              | Robert Koch Institute | unknown |
| EPI_ISL_1157222                                                                                                                                                                                                                                                                                                                                                                                                                                                                                                                                                   | Medizinisches Labor Ostsachsen MVZ<br>GbR Nebenbetriebsstätte Dresden   | Robert Koch Institute | unknown |
| EPI_ISL_1157223                                                                                                                                                                                                                                                                                                                                                                                                                                                                                                                                                   | Uniklinikum Carl Gustav Carus an der TU Dresden; Institut für Virologie | Robert Koch Institute | unknown |
| EPI_ISL_1157225                                                                                                                                                                                                                                                                                                                                                                                                                                                                                                                                                   | Städtisches Klinikum Dresden                                            | Robert Koch Institute | unknown |
| EPI_ISL_1157226                                                                                                                                                                                                                                                                                                                                                                                                                                                                                                                                                   | Uniklinikum Carl Gustav Carus an der TU Dresden; Institut für Virologie | Robert Koch Institute | unknown |
| EPI_ISL_1157227                                                                                                                                                                                                                                                                                                                                                                                                                                                                                                                                                   | Medizinisches Labor Ostsachsen MVZ<br>GbR Nebenbetriebsstätte Dresden   | Robert Koch Institute | unknown |
| EPI_ISL_1157228                                                                                                                                                                                                                                                                                                                                                                                                                                                                                                                                                   | Städtisches Klinikum Dresden                                            | Robert Koch Institute | unknown |
| EPI_ISL_1157231                                                                                                                                                                                                                                                                                                                                                                                                                                                                                                                                                   | Medizinisches Labor Ostsachsen MVZ<br>GbR Nebenbetriebsstätte Dresden   | Robert Koch Institute | unknown |
| EPI_ISL_1157234                                                                                                                                                                                                                                                                                                                                                                                                                                                                                                                                                   | Uniklinikum Carl Gustav Carus an der TU Dresden; Institut für           | Robert Koch Institute | unknown |

|                                                                                                            |                                                                                   |                                    |                                                                                                                                                           |
|------------------------------------------------------------------------------------------------------------|-----------------------------------------------------------------------------------|------------------------------------|-----------------------------------------------------------------------------------------------------------------------------------------------------------|
| EPI_ISL_1157236                                                                                            | Virologie<br>Medizinisches Labor Ostsachsen MVZ<br>GbRNebenbetriebsstätte Dresden | Robert Koch Institute              | unknown                                                                                                                                                   |
| EPI_ISL_1157237, EPI_ISL_1157239                                                                           | Uniklinikum Carl Gustav Carus an der TU Dresden; Institut für<br>Virologie        | Robert Koch Institute              | unknown                                                                                                                                                   |
| EPI_ISL_1157240, EPI_ISL_1157242,<br>EPI_ISL_1157243                                                       | Städtisches Klinikum Dresden                                                      | Robert Koch Institute              | unknown                                                                                                                                                   |
| EPI_ISL_1157244, EPI_ISL_1157245,<br>EPI_ISL_1157248, EPI_ISL_1157250                                      | Uniklinikum Carl Gustav Carus an der TU Dresden; Institut für<br>Virologie        | Robert Koch Institute              | unknown                                                                                                                                                   |
| EPI_ISL_1157253                                                                                            | Städtisches Klinikum Dresden                                                      | Robert Koch Institute              | unknown                                                                                                                                                   |
| EPI_ISL_1157255                                                                                            | Medizinisches Labor Ostsachsen MVZ<br>GbRNebenbetriebsstätte Dresden              | Robert Koch Institute              | unknown                                                                                                                                                   |
| EPI_ISL_1157256, EPI_ISL_1157257,<br>EPI_ISL_1157258, EPI_ISL_1157259                                      | Uniklinikum Carl Gustav Carus an der TU Dresden; Institut für<br>Virologie        | Robert Koch Institute              | unknown                                                                                                                                                   |
| EPI_ISL_1157261                                                                                            | LABOR CHEMNITZ - Zentrum für Diagnostik am Klinikum<br>Chemnitz                   | Robert Koch Institute              | unknown                                                                                                                                                   |
| EPI_ISL_1157262                                                                                            | Medizinisches Labor Ostsachsen MVZ<br>GbRNebenbetriebsstätte Dresden              | Robert Koch Institute              | unknown                                                                                                                                                   |
| EPI_ISL_1157263                                                                                            | Städtisches Klinikum Dresden                                                      | Robert Koch Institute              | unknown                                                                                                                                                   |
| EPI_ISL_1157264                                                                                            | Oberlausitz Kliniken gGmbH                                                        | Robert Koch Institute              | unknown                                                                                                                                                   |
| EPI_ISL_1157265                                                                                            | Uniklinikum Carl Gustav Carus an der TU Dresden; Institut für<br>Virologie        | Robert Koch Institute              | unknown                                                                                                                                                   |
| EPI_ISL_1157267                                                                                            | Oberlausitz Kliniken gGmbH                                                        | Robert Koch Institute              | unknown                                                                                                                                                   |
| EPI_ISL_1157273                                                                                            | Medizinisches Labor Ostsachsen MVZ<br>GbRNebenbetriebsstätte Dresden              | Robert Koch Institute              | unknown                                                                                                                                                   |
| EPI_ISL_1157275                                                                                            | Uniklinikum Carl Gustav Carus an der TU Dresden; Institut für<br>Virologie        | Robert Koch Institute              | unknown                                                                                                                                                   |
| EPI_ISL_1157276                                                                                            | Städtisches Klinikum Dresden                                                      | Robert Koch Institute              | unknown                                                                                                                                                   |
| EPI_ISL_1157285, EPI_ISL_1157287,<br>EPI_ISL_1157313, EPI_ISL_1157356                                      | Bayerisches Landesamt für Gesundheit und<br>Lebensmittelsicherheit (LGL)          | Robert Koch Institute              | unknown                                                                                                                                                   |
| EPI_ISL_1157364, EPI_ISL_1157368,<br>EPI_ISL_1157370, EPI_ISL_1157371,<br>EPI_ISL_1157372, EPI_ISL_1157376 | Thüringer Landesamtes für Verbraucherschutz                                       | Robert Koch Institute              | unknown                                                                                                                                                   |
| EPI_ISL_1157378, EPI_ISL_1157380                                                                           | SYNLAB Jena Oncoscreen                                                            | Robert Koch Institute              | unknown                                                                                                                                                   |
| EPI_ISL_1157381, EPI_ISL_1157382                                                                           | SYNLAB MVZ Weiden                                                                 | Robert Koch Institute              | unknown                                                                                                                                                   |
| EPI_ISL_1157383                                                                                            | SYNLAB Jena Oncoscreen                                                            | Robert Koch Institute              | unknown                                                                                                                                                   |
| EPI_ISL_1157395                                                                                            | Synlab MVZ Augsburg                                                               | Robert Koch Institute              | unknown                                                                                                                                                   |
| EPI_ISL_1157398                                                                                            | SYNLAB MVZ Weiden                                                                 | Robert Koch Institute              | unknown                                                                                                                                                   |
| EPI_ISL_1157400                                                                                            | SYNLAB Jena Oncoscreen                                                            | Robert Koch Institute              | unknown                                                                                                                                                   |
| EPI_ISL_1157403                                                                                            | SYNLAB MVZ Trier                                                                  | Robert Koch Institute              | unknown                                                                                                                                                   |
| EPI_ISL_1157410                                                                                            | SYNLAB Jena Oncoscreen                                                            | Robert Koch Institute              | unknown                                                                                                                                                   |
| EPI_ISL_1157411                                                                                            | Synlab MVZ Augsburg                                                               | Robert Koch Institute              | unknown                                                                                                                                                   |
| EPI_ISL_1157412                                                                                            | SYNLAB MVZ Weiden                                                                 | Robert Koch Institute              | unknown                                                                                                                                                   |
| EPI_ISL_1157416, EPI_ISL_1157425                                                                           | Northwestern Memorial Hospital                                                    | Northwestern University - Ozer Lab | Ramon Lorenzo-Redondo, Lacy M. Simons, Taylor J. Dean, Chad J. Achenbach, Lawrence J. Jennings, Chao Qi, Michael G. Ison, Judd F. Hultquist, Egon A. Ozer |
| EPI_ISL_1157426                                                                                            | Synlab MVZ Augsburg                                                               | Robert Koch Institute              | unknown                                                                                                                                                   |
| EPI_ISL_1157435                                                                                            | SYNLAB Jena Oncoscreen                                                            | Robert Koch Institute              | unknown                                                                                                                                                   |
| EPI_ISL_1157442                                                                                            | SYNLAB MVZ Weiden                                                                 | Robert Koch Institute              | unknown                                                                                                                                                   |
| EPI_ISL_1157445                                                                                            | SYNLAB MVZ Dachau                                                                 | Robert Koch Institute              | unknown                                                                                                                                                   |
| EPI_ISL_1157480                                                                                            | SYNLAB Jena Oncoscreen                                                            | Robert Koch Institute              | unknown                                                                                                                                                   |
| EPI_ISL_1157512                                                                                            | SYNLAB MVZ Trier                                                                  | Robert Koch Institute              | unknown                                                                                                                                                   |
| EPI_ISL_1157513                                                                                            | SYNLAB Jena Oncoscreen                                                            | Robert Koch Institute              | unknown                                                                                                                                                   |
| EPI_ISL_1157528                                                                                            | SYNLAB MVZ Trier                                                                  | Robert Koch Institute              | unknown                                                                                                                                                   |
| EPI_ISL_1157531, EPI_ISL_1157540                                                                           | SYNLAB MVZ Weiden                                                                 | Robert Koch Institute              | unknown                                                                                                                                                   |
| EPI_ISL_1157542                                                                                            | SYNLAB MVZ Berlin                                                                 | Robert Koch Institute              | unknown                                                                                                                                                   |
| EPI_ISL_1157543, EPI_ISL_1157544                                                                           | Northwestern Memorial Hospital                                                    | Northwestern University - Ozer Lab | Ramon Lorenzo-Redondo, Lacy M. Simons, Taylor J. Dean, Chad J. Achenbach, Lawrence J. Jennings, Chao Qi, Michael G. Ison, Judd F. Hultquist, Egon A. Ozer |
| EPI_ISL_1157547                                                                                            | SYNLAB MVZ Weiden                                                                 | Robert Koch Institute              | unknown                                                                                                                                                   |
| EPI_ISL_1157549, EPI_ISL_1157551,<br>EPI_ISL_1157553, EPI_ISL_1157555,<br>EPI_ISL_1157556                  | Northwestern Memorial Hospital                                                    | Northwestern University - Ozer Lab | Ramon Lorenzo-Redondo, Lacy M. Simons, Taylor J. Dean, Chad J. Achenbach, Lawrence J. Jennings, Chao Qi, Michael G. Ison, Judd F. Hultquist, Egon A. Ozer |
| EPI_ISL_1157557                                                                                            | SYNLAB MVZ Weiden                                                                 | Robert Koch Institute              | unknown                                                                                                                                                   |
| EPI_ISL_1157558, EPI_ISL_1157560                                                                           | Northwestern Memorial Hospital                                                    | Northwestern University - Ozer Lab | Ramon Lorenzo-Redondo, Lacy M. Simons, Taylor J. Dean, Chad J. Achenbach, Lawrence J. Jennings, Chao Qi, Michael G. Ison, Judd F. Hultquist, Egon A. Ozer |
| EPI_ISL_1157561                                                                                            | SYNLAB Jena Oncoscreen                                                            | Robert Koch Institute              | unknown                                                                                                                                                   |

|                                                                                                                                                                                                                                                                                                                                                                                                                                                                                                                                                                                                                                                                                                                                                                                                                                                                                                    |                                           |                                                            |                                                                                                                                                           |
|----------------------------------------------------------------------------------------------------------------------------------------------------------------------------------------------------------------------------------------------------------------------------------------------------------------------------------------------------------------------------------------------------------------------------------------------------------------------------------------------------------------------------------------------------------------------------------------------------------------------------------------------------------------------------------------------------------------------------------------------------------------------------------------------------------------------------------------------------------------------------------------------------|-------------------------------------------|------------------------------------------------------------|-----------------------------------------------------------------------------------------------------------------------------------------------------------|
| EPI_ISL_1157562, EPI_ISL_1157563, EPI_ISL_1157565, EPI_ISL_1157567, EPI_ISL_1157569, EPI_ISL_1157570, EPI_ISL_1157572, EPI_ISL_1157574, EPI_ISL_1157576                                                                                                                                                                                                                                                                                                                                                                                                                                                                                                                                                                                                                                                                                                                                            | Northwestern Memorial Hospital            | Northwestern University - Ozer Lab                         | Ramon Lorenzo-Redondo, Lacy M. Simons, Taylor J. Dean, Chad J. Achenbach, Lawrence J. Jennings, Chao Qi, Michael G. Ison, Judd F. Hultquist, Egon A. Ozer |
| EPI_ISL_1157578                                                                                                                                                                                                                                                                                                                                                                                                                                                                                                                                                                                                                                                                                                                                                                                                                                                                                    | SYNLAB MVZ Weiden                         | Robert Koch Institute                                      | unknown                                                                                                                                                   |
| EPI_ISL_1157579                                                                                                                                                                                                                                                                                                                                                                                                                                                                                                                                                                                                                                                                                                                                                                                                                                                                                    | Northwestern Memorial Hospital            | Northwestern University - Ozer Lab                         | Ramon Lorenzo-Redondo, Lacy M. Simons, Taylor J. Dean, Chad J. Achenbach, Lawrence J. Jennings, Chao Qi, Michael G. Ison, Judd F. Hultquist, Egon A. Ozer |
| EPI_ISL_1157580                                                                                                                                                                                                                                                                                                                                                                                                                                                                                                                                                                                                                                                                                                                                                                                                                                                                                    | SYNLAB MVZ Weiden                         | Robert Koch Institute                                      | unknown                                                                                                                                                   |
| EPI_ISL_1157581                                                                                                                                                                                                                                                                                                                                                                                                                                                                                                                                                                                                                                                                                                                                                                                                                                                                                    | Northwestern Memorial Hospital            | Northwestern University - Ozer Lab                         | Ramon Lorenzo-Redondo, Lacy M. Simons, Taylor J. Dean, Chad J. Achenbach, Lawrence J. Jennings, Chao Qi, Michael G. Ison, Judd F. Hultquist, Egon A. Ozer |
| EPI_ISL_1157584                                                                                                                                                                                                                                                                                                                                                                                                                                                                                                                                                                                                                                                                                                                                                                                                                                                                                    | SYNLAB Jena Oncoscreen                    | Robert Koch Institute                                      | unknown                                                                                                                                                   |
| EPI_ISL_1157585                                                                                                                                                                                                                                                                                                                                                                                                                                                                                                                                                                                                                                                                                                                                                                                                                                                                                    | Northwestern Memorial Hospital            | Northwestern University - Ozer Lab                         | Ramon Lorenzo-Redondo, Lacy M. Simons, Taylor J. Dean, Chad J. Achenbach, Lawrence J. Jennings, Chao Qi, Michael G. Ison, Judd F. Hultquist, Egon A. Ozer |
| EPI_ISL_1157600                                                                                                                                                                                                                                                                                                                                                                                                                                                                                                                                                                                                                                                                                                                                                                                                                                                                                    | SYNLAB MVZ Berlin                         | Robert Koch Institute                                      | unknown                                                                                                                                                   |
| EPI_ISL_1157603, EPI_ISL_1157605                                                                                                                                                                                                                                                                                                                                                                                                                                                                                                                                                                                                                                                                                                                                                                                                                                                                   | SYNLAB MVZ Weiden                         | Robert Koch Institute                                      | unknown                                                                                                                                                   |
| EPI_ISL_1157610                                                                                                                                                                                                                                                                                                                                                                                                                                                                                                                                                                                                                                                                                                                                                                                                                                                                                    | Synlab MVZ Augsburg                       | Robert Koch Institute                                      | unknown                                                                                                                                                   |
| EPI_ISL_1157613                                                                                                                                                                                                                                                                                                                                                                                                                                                                                                                                                                                                                                                                                                                                                                                                                                                                                    | SYNLAB Jena Oncoscreen                    | Robert Koch Institute                                      | unknown                                                                                                                                                   |
| EPI_ISL_1157615, EPI_ISL_1157627, EPI_ISL_1157629, EPI_ISL_1157637                                                                                                                                                                                                                                                                                                                                                                                                                                                                                                                                                                                                                                                                                                                                                                                                                                 | SYNLAB MVZ Weiden                         | Robert Koch Institute                                      | unknown                                                                                                                                                   |
| EPI_ISL_1157644                                                                                                                                                                                                                                                                                                                                                                                                                                                                                                                                                                                                                                                                                                                                                                                                                                                                                    | SYNLAB Jena Oncoscreen                    | Robert Koch Institute                                      | unknown                                                                                                                                                   |
| EPI_ISL_1157646                                                                                                                                                                                                                                                                                                                                                                                                                                                                                                                                                                                                                                                                                                                                                                                                                                                                                    | SYNLAB MVZ Weiden                         | Robert Koch Institute                                      | unknown                                                                                                                                                   |
| EPI_ISL_1157647                                                                                                                                                                                                                                                                                                                                                                                                                                                                                                                                                                                                                                                                                                                                                                                                                                                                                    | SYNLAB Jena Oncoscreen                    | Robert Koch Institute                                      | unknown                                                                                                                                                   |
| EPI_ISL_1157650, EPI_ISL_1157651, EPI_ISL_1157655                                                                                                                                                                                                                                                                                                                                                                                                                                                                                                                                                                                                                                                                                                                                                                                                                                                  | SYNLAB MVZ Weiden                         | Robert Koch Institute                                      | unknown                                                                                                                                                   |
| EPI_ISL_1157657                                                                                                                                                                                                                                                                                                                                                                                                                                                                                                                                                                                                                                                                                                                                                                                                                                                                                    | SYNLAB Jena Oncoscreen                    | Robert Koch Institute                                      | unknown                                                                                                                                                   |
| EPI_ISL_1157658, EPI_ISL_1157660, EPI_ISL_1157663, EPI_ISL_1157672                                                                                                                                                                                                                                                                                                                                                                                                                                                                                                                                                                                                                                                                                                                                                                                                                                 | SYNLAB MVZ Weiden                         | Robert Koch Institute                                      | unknown                                                                                                                                                   |
| EPI_ISL_1157675                                                                                                                                                                                                                                                                                                                                                                                                                                                                                                                                                                                                                                                                                                                                                                                                                                                                                    | SYNLAB Jena Oncoscreen                    | Robert Koch Institute                                      | unknown                                                                                                                                                   |
| EPI_ISL_1157676                                                                                                                                                                                                                                                                                                                                                                                                                                                                                                                                                                                                                                                                                                                                                                                                                                                                                    | Synlab MVZ Augsburg                       | Robert Koch Institute                                      | unknown                                                                                                                                                   |
| EPI_ISL_1157677                                                                                                                                                                                                                                                                                                                                                                                                                                                                                                                                                                                                                                                                                                                                                                                                                                                                                    | SYNLAB Jena Oncoscreen                    | Robert Koch Institute                                      | unknown                                                                                                                                                   |
| EPI_ISL_1157683                                                                                                                                                                                                                                                                                                                                                                                                                                                                                                                                                                                                                                                                                                                                                                                                                                                                                    | SYNLAB MVZ Weiden                         | Robert Koch Institute                                      | unknown                                                                                                                                                   |
| EPI_ISL_1157684                                                                                                                                                                                                                                                                                                                                                                                                                                                                                                                                                                                                                                                                                                                                                                                                                                                                                    | SYNLAB Jena Oncoscreen                    | Robert Koch Institute                                      | unknown                                                                                                                                                   |
| EPI_ISL_1157687, EPI_ISL_1157690, EPI_ISL_1157696                                                                                                                                                                                                                                                                                                                                                                                                                                                                                                                                                                                                                                                                                                                                                                                                                                                  | SYNLAB MVZ Weiden                         | Robert Koch Institute                                      | unknown                                                                                                                                                   |
| EPI_ISL_1157703                                                                                                                                                                                                                                                                                                                                                                                                                                                                                                                                                                                                                                                                                                                                                                                                                                                                                    | SYNLAB Jena Oncoscreen                    | Robert Koch Institute                                      | unknown                                                                                                                                                   |
| EPI_ISL_1157704                                                                                                                                                                                                                                                                                                                                                                                                                                                                                                                                                                                                                                                                                                                                                                                                                                                                                    | SYNLAB MVZ Weiden                         | Robert Koch Institute                                      | unknown                                                                                                                                                   |
| EPI_ISL_1157714, EPI_ISL_1157718                                                                                                                                                                                                                                                                                                                                                                                                                                                                                                                                                                                                                                                                                                                                                                                                                                                                   | SYNLAB Jena Oncoscreen                    | Robert Koch Institute                                      | unknown                                                                                                                                                   |
| EPI_ISL_1157721, EPI_ISL_1157724                                                                                                                                                                                                                                                                                                                                                                                                                                                                                                                                                                                                                                                                                                                                                                                                                                                                   | SYNLAB MVZ Weiden                         | Robert Koch Institute                                      | unknown                                                                                                                                                   |
| EPI_ISL_1157730                                                                                                                                                                                                                                                                                                                                                                                                                                                                                                                                                                                                                                                                                                                                                                                                                                                                                    | Synlab MVZ Augsburg                       | Robert Koch Institute                                      | unknown                                                                                                                                                   |
| EPI_ISL_1157731                                                                                                                                                                                                                                                                                                                                                                                                                                                                                                                                                                                                                                                                                                                                                                                                                                                                                    | SYNLAB MVZ Weiden                         | Robert Koch Institute                                      | unknown                                                                                                                                                   |
| EPI_ISL_1157734, EPI_ISL_1157747                                                                                                                                                                                                                                                                                                                                                                                                                                                                                                                                                                                                                                                                                                                                                                                                                                                                   | SYNLAB MVZ Trier                          | Robert Koch Institute                                      | unknown                                                                                                                                                   |
| EPI_ISL_1157750, EPI_ISL_1157754, EPI_ISL_1157755                                                                                                                                                                                                                                                                                                                                                                                                                                                                                                                                                                                                                                                                                                                                                                                                                                                  | SYNLAB MVZ Weiden                         | Robert Koch Institute                                      | unknown                                                                                                                                                   |
| EPI_ISL_1157758                                                                                                                                                                                                                                                                                                                                                                                                                                                                                                                                                                                                                                                                                                                                                                                                                                                                                    | SYNLAB Jena Oncoscreen                    | Robert Koch Institute                                      | unknown                                                                                                                                                   |
| EPI_ISL_1157759, EPI_ISL_1157760, EPI_ISL_1157761                                                                                                                                                                                                                                                                                                                                                                                                                                                                                                                                                                                                                                                                                                                                                                                                                                                  | SYNLAB MVZ Weiden                         | Robert Koch Institute                                      | unknown                                                                                                                                                   |
| EPI_ISL_1157762                                                                                                                                                                                                                                                                                                                                                                                                                                                                                                                                                                                                                                                                                                                                                                                                                                                                                    | SYNLAB MVZ Heidelberg                     | Robert Koch Institute                                      | unknown                                                                                                                                                   |
| EPI_ISL_1157773                                                                                                                                                                                                                                                                                                                                                                                                                                                                                                                                                                                                                                                                                                                                                                                                                                                                                    | SYNLAB Jena Oncoscreen                    | Robert Koch Institute                                      | unknown                                                                                                                                                   |
| EPI_ISL_1157775                                                                                                                                                                                                                                                                                                                                                                                                                                                                                                                                                                                                                                                                                                                                                                                                                                                                                    | SYNLAB MVZ Berlin                         | Robert Koch Institute                                      | unknown                                                                                                                                                   |
| EPI_ISL_1157778                                                                                                                                                                                                                                                                                                                                                                                                                                                                                                                                                                                                                                                                                                                                                                                                                                                                                    | SYNLAB MVZ Trier                          | Robert Koch Institute                                      | unknown                                                                                                                                                   |
| EPI_ISL_1157783                                                                                                                                                                                                                                                                                                                                                                                                                                                                                                                                                                                                                                                                                                                                                                                                                                                                                    | SYNLAB MVZ Weiden                         | Robert Koch Institute                                      | unknown                                                                                                                                                   |
| EPI_ISL_1157787, EPI_ISL_1157799                                                                                                                                                                                                                                                                                                                                                                                                                                                                                                                                                                                                                                                                                                                                                                                                                                                                   | SYNLAB Jena Oncoscreen                    | Robert Koch Institute                                      | unknown                                                                                                                                                   |
| EPI_ISL_1157800, EPI_ISL_1157802                                                                                                                                                                                                                                                                                                                                                                                                                                                                                                                                                                                                                                                                                                                                                                                                                                                                   | SYNLAB MVZ Trier                          | Robert Koch Institute                                      | unknown                                                                                                                                                   |
| EPI_ISL_1157812, EPI_ISL_1157815, EPI_ISL_1157816, EPI_ISL_1157819, EPI_ISL_1157821                                                                                                                                                                                                                                                                                                                                                                                                                                                                                                                                                                                                                                                                                                                                                                                                                | SYNLAB MVZ Weiden                         | Robert Koch Institute                                      | unknown                                                                                                                                                   |
| EPI_ISL_1157823                                                                                                                                                                                                                                                                                                                                                                                                                                                                                                                                                                                                                                                                                                                                                                                                                                                                                    | SYNLAB MVZ Berlin                         | Robert Koch Institute                                      | unknown                                                                                                                                                   |
| EPI_ISL_1158547, EPI_ISL_1158548                                                                                                                                                                                                                                                                                                                                                                                                                                                                                                                                                                                                                                                                                                                                                                                                                                                                   | Laboratoire Vivalia - Cliniques St-Joseph | Plateforme de testing Namuroise                            | Maschietto Céline ; Otto Gaetan ; Denis Olivier ; Degosserie Jonathan ; Mullier François                                                                  |
| EPI_ISL_1158642                                                                                                                                                                                                                                                                                                                                                                                                                                                                                                                                                                                                                                                                                                                                                                                                                                                                                    | Dutch COVID-19 response team              | Medical Microbiology, Maastricht University Medical Centre | Jozef Dingemans*, Brian van der Veer*, Erik Beuken, Carmen Reumkens, Lieke van Alphen, Christian Hoebe, Paul Savelkoul                                    |
| EPI_ISL_1158937, EPI_ISL_1158939, EPI_ISL_1158940, EPI_ISL_1158941, EPI_ISL_1158942, EPI_ISL_1158943, EPI_ISL_1158944, EPI_ISL_1158945, EPI_ISL_1158946, EPI_ISL_1158947, EPI_ISL_1158949, EPI_ISL_1158950, EPI_ISL_1158951, EPI_ISL_1158952, EPI_ISL_1158953, EPI_ISL_1158954, EPI_ISL_1158955, EPI_ISL_1158956, EPI_ISL_1158957, EPI_ISL_1158958, EPI_ISL_1158960, EPI_ISL_1158961, EPI_ISL_1158963, EPI_ISL_1158964, EPI_ISL_1158965, EPI_ISL_1158966, EPI_ISL_1158967, EPI_ISL_1158968, EPI_ISL_1158969, EPI_ISL_1158971, EPI_ISL_1158973, EPI_ISL_1158974, EPI_ISL_1158975, EPI_ISL_1158976, EPI_ISL_1158980, EPI_ISL_1158981, EPI_ISL_1158982, EPI_ISL_1158983, EPI_ISL_1158985, EPI_ISL_1158991, EPI_ISL_1158992, EPI_ISL_1158993, EPI_ISL_1158996, EPI_ISL_1158999, EPI_ISL_1159000, EPI_ISL_1159002, EPI_ISL_1159003, EPI_ISL_1159005, EPI_ISL_1159006, EPI_ISL_1159012, EPI_ISL_1159016, |                                           |                                                            |                                                                                                                                                           |











|                                                                                                                                                                                                                                                                                                                                                                                                                                                                                                                                                                                                                   | Center                                   | Emmanouil Dermitzakis                                                                                                                                                                                                                                                                    |
|-------------------------------------------------------------------------------------------------------------------------------------------------------------------------------------------------------------------------------------------------------------------------------------------------------------------------------------------------------------------------------------------------------------------------------------------------------------------------------------------------------------------------------------------------------------------------------------------------------------------|------------------------------------------|------------------------------------------------------------------------------------------------------------------------------------------------------------------------------------------------------------------------------------------------------------------------------------------|
| EPI_ISL_1167128, EPI_ISL_1167134, EPI_ISL_1167170, EPI_ISL_1167171, EPI_ISL_1167181, EPI_ISL_1167182                                                                                                                                                                                                                                                                                                                                                                                                                                                                                                              | Iressef Genomics lab                     | L'institut de Recherche en Santé, de Surveillance Épidémiologique et de Formation (IRESSEF)                                                                                                                                                                                              |
| EPI_ISL_1167218, EPI_ISL_1167233, EPI_ISL_1167234, EPI_ISL_1167235, EPI_ISL_1167236, EPI_ISL_1167237, EPI_ISL_1167238, EPI_ISL_1167239, EPI_ISL_1167240, EPI_ISL_1167241, EPI_ISL_1167242, EPI_ISL_1167243, EPI_ISL_1167244, EPI_ISL_1167245, EPI_ISL_1167246, EPI_ISL_1167247, EPI_ISL_1167251, EPI_ISL_1167252, EPI_ISL_1167253, EPI_ISL_1167254                                                                                                                                                                                                                                                                |                                          | Souleymane MBOUP, Abdou PADANE, Abdoulie KANTEH , Abdul Karim SESAY , Khadim GUEYE, Papa Alassane DIAW, Birahim Piere NDIAYE, Barada CISSE, Aminata MBOUP, Moustapha MBOW, Ndeye Coumba Toure KANE, Nafisatou LEYE, Gora LO, Ambroise AHOUIDI , Astou Gaye GAYE, Aminata DIA, Yacine DIA |
| see above                                                                                                                                                                                                                                                                                                                                                                                                                                                                                                                                                                                                         | UW Virology Lab                          | Pavitra Rouchoudhury, Hong Xie, Lasata Shrestha, Shah Mohamed Bakhsh, Michelle Lin, Noah Baker, Meei-Li Huang, Keith R Jerome, Alexander Greninger                                                                                                                                       |
| EPI_ISL_1167261, EPI_ISL_1167266, EPI_ISL_1167268, EPI_ISL_1167269, EPI_ISL_1167272, EPI_ISL_1167278, EPI_ISL_1167285, EPI_ISL_1167287, EPI_ISL_1167288, EPI_ISL_1167289, EPI_ISL_1167294                                                                                                                                                                                                                                                                                                                                                                                                                         |                                          |                                                                                                                                                                                                                                                                                          |
| see above                                                                                                                                                                                                                                                                                                                                                                                                                                                                                                                                                                                                         | Maryland Public Health Laboratory        | Maryland Department of Health Laboratories Administration                                                                                                                                                                                                                                |
| EPI_ISL_1167302, EPI_ISL_1167305, EPI_ISL_1167306                                                                                                                                                                                                                                                                                                                                                                                                                                                                                                                                                                 | Laboratoire de santé publique du Québec  | Sandrine Moreira, Ioannis Ragoussis, Guillaume Bourque, Jesse Shapiro, Mark Lathrop and Michel Roger on behalf of the CoVSeQ research group                                                                                                                                              |
| EPI_ISL_1167408                                                                                                                                                                                                                                                                                                                                                                                                                                                                                                                                                                                                   | ASL Napoli 1 Centro                      | "Giovanni Savarese, Raffaella Ruggiero, Eloisa Evangelista, Antonella Di Carlo, Luisa Circelli, Luigi D'Amore, Nadia Petrillo, Monica Ianniello, Roberto Sirica,Maurizio D'Amora, Antonio Fico"                                                                                          |
| EPI_ISL_1167576, EPI_ISL_1167579, EPI_ISL_1167581, EPI_ISL_1167584, EPI_ISL_1167585, EPI_ISL_1167587, EPI_ISL_1167588, EPI_ISL_1167590, EPI_ISL_1167591, EPI_ISL_1167595, EPI_ISL_1167596, EPI_ISL_1167600, EPI_ISL_1167602, EPI_ISL_1167609, EPI_ISL_1167612, EPI_ISL_1167616, EPI_ISL_1167622, EPI_ISL_1167624, EPI_ISL_1167630, EPI_ISL_1167634, EPI_ISL_1167648, EPI_ISL_1167659, EPI_ISL_1167660, EPI_ISL_1167662                                                                                                                                                                                            |                                          |                                                                                                                                                                                                                                                                                          |
| see above                                                                                                                                                                                                                                                                                                                                                                                                                                                                                                                                                                                                         | Ministry of Health Turkey                | Fatma Bayrakdar, Yasemin Cosgun, Suleyman Yalcin, Gulay Korukluoglu                                                                                                                                                                                                                      |
| EPI_ISL_1168049, EPI_ISL_1168050                                                                                                                                                                                                                                                                                                                                                                                                                                                                                                                                                                                  | Klinisk mikrobiologi                     | Anna-Malin Linde, Maria Lind Karlberg, Carlo Berg, Oskar Karlsson Lindsjo, Sofia Stamouli, Reza Advani, Mattias Haukland, Petra Holmstrom, Noura Walai, Petra Edquist, Mia Brytting, Anna Risberg, Karin Tegmark-Wisell                                                                  |
| EPI_ISL_1168051                                                                                                                                                                                                                                                                                                                                                                                                                                                                                                                                                                                                   | A05                                      | The Public Health Agency of Sweden                                                                                                                                                                                                                                                       |
| EPI_ISL_1168052                                                                                                                                                                                                                                                                                                                                                                                                                                                                                                                                                                                                   | Klinisk Mikrobiologi                     | Anna-Malin Linde, Maria Lind Karlberg, Carlo Berg, Oskar Karlsson Lindsjo, Sofia Stamouli, Reza Advani, Mattias Haukland, Petra Holmstrom, Noura Walai, Petra Edquist, Mia Brytting, Anna Risberg, Karin Tegmark-Wisell                                                                  |
| EPI_ISL_1168054, EPI_ISL_1168055, EPI_ISL_1168056, EPI_ISL_1168057, EPI_ISL_1168058                                                                                                                                                                                                                                                                                                                                                                                                                                                                                                                               | Mikrobiologen                            | Anna-Malin Linde, Maria Lind Karlberg, Carlo Berg, Oskar Karlsson Lindsjo, Sofia Stamouli, Reza Advani, Mattias Haukland, Petra Holmstrom, Noura Walai, Petra Edquist, Mia Brytting, Anna Risberg, Karin Tegmark-Wisell                                                                  |
| EPI_ISL_1168063, EPI_ISL_1168064, EPI_ISL_1168065, EPI_ISL_1168067                                                                                                                                                                                                                                                                                                                                                                                                                                                                                                                                                | Klinisk mikrobiologi                     | Anna-Malin Linde, Maria Lind Karlberg, Carlo Berg, Oskar Karlsson Lindsjo, Sofia Stamouli, Reza Advani, Mattias Haukland, Petra Holmstrom, Noura Walai, Petra Edquist, Mia Brytting, Anna Risberg, Karin Tegmark-Wisell                                                                  |
| EPI_ISL_1168069                                                                                                                                                                                                                                                                                                                                                                                                                                                                                                                                                                                                   | ABC labs                                 | Anna-Malin Linde, Maria Lind Karlberg, Carlo Berg, Oskar Karlsson Lindsjo, Sofia Stamouli, Reza Advani, Mattias Haukland, Petra Holmstrom, Noura Walai, Petra Edquist, Mia Brytting, Anna Risberg, Karin Tegmark-Wisell                                                                  |
| EPI_ISL_1168070, EPI_ISL_1168071, EPI_ISL_1168072, EPI_ISL_1168073, EPI_ISL_1168074, EPI_ISL_1168076, EPI_ISL_1168078, EPI_ISL_1168080, EPI_ISL_1168082, EPI_ISL_1168083, EPI_ISL_1168088, EPI_ISL_1168090, EPI_ISL_1168092, EPI_ISL_1168093                                                                                                                                                                                                                                                                                                                                                                      |                                          |                                                                                                                                                                                                                                                                                          |
| see above                                                                                                                                                                                                                                                                                                                                                                                                                                                                                                                                                                                                         | Klinisk mikrobiologi                     | Anna-Malin Linde, Maria Lind Karlberg, Carlo Berg, Oskar Karlsson Lindsjo, Sofia Stamouli, Reza Advani, Mattias Haukland, Petra Holmstrom, Noura Walai, Petra Edquist, Mia Brytting, Anna Risberg, Karin Tegmark-Wisell                                                                  |
| EPI_ISL_1168094                                                                                                                                                                                                                                                                                                                                                                                                                                                                                                                                                                                                   | Laboratoriemedicin, Klinisk mikrobiologi | Anna-Malin Linde, Maria Lind Karlberg, Carlo Berg, Oskar Karlsson Lindsjo, Sofia Stamouli, Reza Advani, Mattias Haukland, Petra Holmstrom, Noura Walai, Petra Edquist, Mia Brytting, Anna Risberg, Karin Tegmark-Wisell                                                                  |
| EPI_ISL_1168096, EPI_ISL_1168097, EPI_ISL_1168098                                                                                                                                                                                                                                                                                                                                                                                                                                                                                                                                                                 | NPC                                      | Anna-Malin Linde, Maria Lind Karlberg, Carlo Berg, Oskar Karlsson Lindsjo, Sofia Stamouli, Reza Advani, Mattias Haukland, Petra Holmstrom, Noura Walai, Petra Edquist, Mia Brytting, Anna Risberg, Karin Tegmark-Wisell                                                                  |
| EPI_ISL_1168104, EPI_ISL_1168105                                                                                                                                                                                                                                                                                                                                                                                                                                                                                                                                                                                  | A05 diagnostics                          | Anna-Malin Linde, Maria Lind Karlberg, Carlo Berg, Oskar Karlsson Lindsjo, Sofia Stamouli, Reza Advani, Mattias Haukland, Petra Holmstrom, Noura Walai, Petra Edquist, Mia Brytting, Anna Risberg, Karin Tegmark-Wisell                                                                  |
| EPI_ISL_1168108, EPI_ISL_1168109, EPI_ISL_1168113, EPI_ISL_1168117, EPI_ISL_1168118, EPI_ISL_1168119, EPI_ISL_1168122, EPI_ISL_1168123, EPI_ISL_1168124, EPI_ISL_1168126, EPI_ISL_1168128, EPI_ISL_1168130, EPI_ISL_1168131, EPI_ISL_1168132, EPI_ISL_1168135, EPI_ISL_1168137, EPI_ISL_1168140, EPI_ISL_1168142, EPI_ISL_1168143, EPI_ISL_1168144, EPI_ISL_1168145, EPI_ISL_1168147, EPI_ISL_1168148, EPI_ISL_1168149, EPI_ISL_1168150, EPI_ISL_1168151, EPI_ISL_1168152, EPI_ISL_1168153, EPI_ISL_1168154, EPI_ISL_1168155, EPI_ISL_1168156, EPI_ISL_1168157, EPI_ISL_1168158, EPI_ISL_1168160, EPI_ISL_1168161 |                                          |                                                                                                                                                                                                                                                                                          |
| see above                                                                                                                                                                                                                                                                                                                                                                                                                                                                                                                                                                                                         | Klinisk mikrobiologi                     | Anna-Malin Linde, Maria Lind Karlberg, Carlo Berg, Oskar Karlsson Lindsjo, Sofia Stamouli, Reza Advani, Mattias Haukland, Petra Holmstrom, Noura Walai, Petra Edquist, Mia Brytting, Anna Risberg, Karin Tegmark-Wisell                                                                  |
| EPI_ISL_1168162, EPI_ISL_1168163, EPI_ISL_1168164, EPI_ISL_1168165, EPI_ISL_1168166, EPI_ISL_1168167                                                                                                                                                                                                                                                                                                                                                                                                                                                                                                              | Klinisk Mikrobiologi                     | Anna-Malin Linde, Maria Lind Karlberg, Carlo Berg, Oskar Karlsson Lindsjo, Sofia Stamouli, Reza Advani, Mattias Haukland, Petra Holmstrom, Noura Walai, Petra Edquist, Mia Brytting, Anna Risberg, Karin Tegmark-Wisell                                                                  |
| EPI_ISL_1168168, EPI_ISL_1168169, EPI_ISL_1168170, EPI_ISL_1168171, EPI_ISL_1168172, EPI_ISL_1168173, EPI_ISL_1168174, EPI_ISL_1168175, EPI_ISL_1168176, EPI_ISL_1168177, EPI_ISL_1168178, EPI_ISL_1168179, EPI_ISL_1168180, EPI_ISL_1168181, EPI_ISL_1168182, EPI_ISL_1168183, EPI_ISL_1168184, EPI_ISL_1168186, EPI_ISL_1168187, EPI_ISL_1168188, EPI_ISL_1168189                                                                                                                                                                                                                                               |                                          |                                                                                                                                                                                                                                                                                          |
| see above                                                                                                                                                                                                                                                                                                                                                                                                                                                                                                                                                                                                         | Klinisk mikrobiologi                     | Anna-Malin Linde, Maria Lind Karlberg, Carlo Berg, Oskar Karlsson Lindsjo, Sofia Stamouli, Reza Advani, Mattias Haukland, Petra Holmstrom, Noura Walai, Petra Edquist, Mia Brytting, Anna Risberg, Karin Tegmark-Wisell                                                                  |
| EPI_ISL_1168191                                                                                                                                                                                                                                                                                                                                                                                                                                                                                                                                                                                                   | Hopital                                  | Marion Barbet, Sylvie Behillil, Méline Bizard, Angela Brisebarre, Camille Capel, Etienne Simon-Lorière, Vincent Enouf, Maud Vanpeene, Sylvie van der Werf                                                                                                                                |
| EPI_ISL_1168193, EPI_ISL_1168194                                                                                                                                                                                                                                                                                                                                                                                                                                                                                                                                                                                  | Hopital                                  | Marion Barbet, Sylvie Behillil, Méline Bizard, Angela Brisebarre, Camille Capel, Etienne Simon-Lorière, Vincent Enouf, Maud Vanpeene, Sylvie van der Werf,Hermann CéCile                                                                                                                 |
| EPI_ISL_1168195, EPI_ISL_1168197, EPI_ISL_1168198                                                                                                                                                                                                                                                                                                                                                                                                                                                                                                                                                                 | Labo Analyses Med                        | Marion Barbet, Sylvie Behillil, Méline Bizard, Angela Brisebarre, Camille Capel, Etienne Simon-Lorière, Vincent Enouf, Maud Vanpeene, Sylvie van der Werf,Lecorche                                                                                                                       |
| EPI_ISL_1168200                                                                                                                                                                                                                                                                                                                                                                                                                                                                                                                                                                                                   | Labo Analyses Med                        | Marion Barbet, Sylvie Behillil, Méline Bizard, Angela Brisebarre, Camille Capel, Etienne Simon-Lorière, Vincent Enouf, Maud Vanpeene, Sylvie van der Werf,Le Vicky                                                                                                                       |
| EPI_ISL_1168203                                                                                                                                                                                                                                                                                                                                                                                                                                                                                                                                                                                                   | Armies                                   | Marion Barbet, Sylvie Behillil, Méline Bizard, Angela Brisebarre, Camille Capel, Etienne Simon-Lorière, Vincent Enouf, Maud Vanpeene, Sylvie van der Werf,Desroches Marine                                                                                                               |
| EPI_ISL_1168206, EPI_ISL_1168207, EPI_ISL_1168208                                                                                                                                                                                                                                                                                                                                                                                                                                                                                                                                                                 | Hopital                                  | Marion Barbet, Sylvie Behillil, Méline Bizard, Angela Brisebarre, Camille Capel, Etienne Simon-Lorière, Vincent Enouf, Maud Vanpeene, Sylvie van der Werf,Labourdette Isabelle                                                                                                           |
| EPI_ISL_1168212, EPI_ISL_1168213, EPI_ISL_1168214, EPI_ISL_1168215, EPI_ISL_1168216, EPI_ISL_1168217                                                                                                                                                                                                                                                                                                                                                                                                                                                                                                              | Armies                                   | Marion Barbet, Sylvie Behillil, Méline Bizard, Angela Brisebarre, Camille Capel, Etienne Simon-Lorière, Vincent Enouf, Maud Vanpeene, Sylvie van der Werf,Desroches Marine                                                                                                               |
| EPI_ISL_1168219, EPI_ISL_1168220                                                                                                                                                                                                                                                                                                                                                                                                                                                                                                                                                                                  | Hopital                                  | Marion Barbet, Sylvie Behillil, Méline Bizard, Angela Brisebarre, Camille Capel, Etienne Simon-Lorière, Vincent Enouf, Maud Vanpeene, Sylvie van der Werf,Capron Nicolas                                                                                                                 |
| EPI_ISL_1168634, EPI_ISL_1168635, EPI_ISL_1168636, EPI_ISL_1168637, EPI_ISL_1168638, EPI_ISL_1168640, EPI_ISL_1168641, EPI_ISL_1168646, EPI_ISL_1168647, EPI_ISL_1168649, EPI_ISL_1168650, EPI_ISL_1168651, EPI_ISL_1168652                                                                                                                                                                                                                                                                                                                                                                                       |                                          |                                                                                                                                                                                                                                                                                          |
| see above                                                                                                                                                                                                                                                                                                                                                                                                                                                                                                                                                                                                         | Instituto Nacional de Medicina Genomica  | Hidalgo-Miranda A, Mendoza-Vargas A, Reyes-Grajeda JP, Cedro-Tanda A, Alcaraz N, Gonzalez-Barrera D, Rangel-DeLeon D, Ramirez-Vega O,                                                                                                                                                    |

|                                                                                                                                                                                                                                                                                                                                                                                                                                                                                                                                                                                                                                                                                                                                                                                                                                                                                                                                                                                                                                                                                                                                                                                                                                                                                                                                            |                                                                                       |                                                                                                                            |                                                                                                                                                                                                                                                                                                                                                                                                                                                    |
|--------------------------------------------------------------------------------------------------------------------------------------------------------------------------------------------------------------------------------------------------------------------------------------------------------------------------------------------------------------------------------------------------------------------------------------------------------------------------------------------------------------------------------------------------------------------------------------------------------------------------------------------------------------------------------------------------------------------------------------------------------------------------------------------------------------------------------------------------------------------------------------------------------------------------------------------------------------------------------------------------------------------------------------------------------------------------------------------------------------------------------------------------------------------------------------------------------------------------------------------------------------------------------------------------------------------------------------------|---------------------------------------------------------------------------------------|----------------------------------------------------------------------------------------------------------------------------|----------------------------------------------------------------------------------------------------------------------------------------------------------------------------------------------------------------------------------------------------------------------------------------------------------------------------------------------------------------------------------------------------------------------------------------------------|
| EPI_ISL_1168707, EPI_ISL_1168710, EPI_ISL_1168712, EPI_ISL_1168716, EPI_ISL_1168717, EPI_ISL_1168725                                                                                                                                                                                                                                                                                                                                                                                                                                                                                                                                                                                                                                                                                                                                                                                                                                                                                                                                                                                                                                                                                                                                                                                                                                       | Houston Health Dept.                                                                  | Houston Health Dept.                                                                                                       | Sifuentes-Rojas C, Cisneros-Villanueva M, Herrera-Montalvo LA                                                                                                                                                                                                                                                                                                                                                                                      |
|                                                                                                                                                                                                                                                                                                                                                                                                                                                                                                                                                                                                                                                                                                                                                                                                                                                                                                                                                                                                                                                                                                                                                                                                                                                                                                                                            |                                                                                       |                                                                                                                            | Ryker Penn, Pamela Brown, Adolpho Lara                                                                                                                                                                                                                                                                                                                                                                                                             |
| EPI_ISL_1169050                                                                                                                                                                                                                                                                                                                                                                                                                                                                                                                                                                                                                                                                                                                                                                                                                                                                                                                                                                                                                                                                                                                                                                                                                                                                                                                            | National Institute of Health Research and Development                                 | National Institute of Health Research and Development                                                                      | Hartanti Dian Ikawati, Hana Apsari Pawestri, Subangkit, Kartika Dewi Puspa, Arie Ardiansyah Nugraha, risna Nur Andriana Pangesti, Yuni Rukminiati, Ririn Ramadhany, Agustiningsih, Kindi Adam, Holy Arif Wibowo, Triyani Soekarso, Ni Ketut Susilarini, Nurika Hariastuti, Ulyly Alfi Nikmah, Reni Herman, Nike Susanti, Herna, Tati Febriyanti, Natalie Laurencia Kipuw, Fauzul Muna, Irene Lorinda Indalao, Nelly Puspandari, Vivi Setiawaty.    |
| EPI_ISL_1169052, EPI_ISL_1169053, EPI_ISL_1169054, EPI_ISL_1169055                                                                                                                                                                                                                                                                                                                                                                                                                                                                                                                                                                                                                                                                                                                                                                                                                                                                                                                                                                                                                                                                                                                                                                                                                                                                         | National Institute of Health Research and Development                                 | National Institute of Health Research and Development                                                                      | Subangkit, Hana Apsari Pawestri, Kartika Dewi Puspa, Arie Ardiansyah Nugraha, Hartanti Dian Ikawati, Krisna Nur Andriana Pangesti, Yuni Rukminiati, Ririn Ramadhany, Agustiningsih, Kindi Adam, Holy Arif Wibowo, Triyani Soekarso, Ni Ketut Susilarini, Nurika Hariastuti, Ulyly Alfi Nikmah, Reni Herman, Nike Susanti, Herna, Tati Febriyanti, Natalie Laurencia Kipuw, Fauzul Muna, Irene Lorinda Indalao, Nelly Puspandari, Vivi Setiawaty.   |
| EPI_ISL_1169056                                                                                                                                                                                                                                                                                                                                                                                                                                                                                                                                                                                                                                                                                                                                                                                                                                                                                                                                                                                                                                                                                                                                                                                                                                                                                                                            | National Institute of Health Research and Development                                 | National Institute of Health Research and Development                                                                      | Kartika Dewi Puspa, Hana Apsari Pawestri, Subangkit, Arie Ardiansyah Nugraha, Hartanti Dian Ikawati, Krisna Nur Andriana Pangesti, Yuni Rukminiati, Ririn Ramadhany, Agustiningsih, Kindi Adam, Holy Arif Wibowo, Triyani Soekarso, Ni Ketut Susilarini, Nurika Hariastuti, Ulyly Alfi Nikmah, Reni Herman, Nike Susanti, Herna, Tati Febriyanti, Natalie Laurencia Kipuw, Fauzul Muna, Irene Lorinda Indalao, Nelly Puspandari, Vivi Setiawaty.   |
| EPI_ISL_1169057, EPI_ISL_1169058                                                                                                                                                                                                                                                                                                                                                                                                                                                                                                                                                                                                                                                                                                                                                                                                                                                                                                                                                                                                                                                                                                                                                                                                                                                                                                           | National Institute of Health Research and Development                                 | National Institute of Health Research and Development                                                                      | Arie Ardiansyah Nugraha, Kartika Dewi Puspa, Hana Apsari Pawestri, Subangkit, , Hartanti Dian Ikawati, Krisna Nur Andriana Pangesti, Yuni Rukminiati, Ririn Ramadhany, Agustiningsih, Kindi Adam, Holy Arif Wibowo, Triyani Soekarso, Ni Ketut Susilarini, Nurika Hariastuti, Ulyly Alfi Nikmah, Reni Herman, Nike Susanti, Herna, Tati Febriyanti, Natalie Laurencia Kipuw, Fauzul Muna, Irene Lorinda Indalao, Nelly Puspandari, Vivi Setiawaty. |
| EPI_ISL_1169059, EPI_ISL_1169060                                                                                                                                                                                                                                                                                                                                                                                                                                                                                                                                                                                                                                                                                                                                                                                                                                                                                                                                                                                                                                                                                                                                                                                                                                                                                                           | National Institute of Health Research and Development                                 | National Institute of Health Research and Development                                                                      | Hartanti Dian Ikawati, Hana Apsari Pawestri, Subangkit, Kartika Dewi Puspa, Arie Ardiansyah Nugraha, risna Nur Andriana Pangesti, Yuni Rukminiati, Ririn Ramadhany, Agustiningsih, Kindi Adam, Holy Arif Wibowo, Triyani Soekarso, Ni Ketut Susilarini, Nurika Hariastuti, Ulyly Alfi Nikmah, Reni Herman, Nike Susanti, Herna, Tati Febriyanti, Natalie Laurencia Kipuw, Fauzul Muna, Irene Lorinda Indalao, Nelly Puspandari, Vivi Setiawaty.    |
| EPI_ISL_1169225, EPI_ISL_1169237, EPI_ISL_1169250                                                                                                                                                                                                                                                                                                                                                                                                                                                                                                                                                                                                                                                                                                                                                                                                                                                                                                                                                                                                                                                                                                                                                                                                                                                                                          | ASL Napoli 1 Centro                                                                   | AMES Centro Poldiagnostico Strumentale S.r.l.                                                                              | "Giovanni Savarese, Raffaella Ruggiero, Eloisa Evangelista, Antonella Di Carlo, Luisa Circelli, Luigi D'Amore, Nadia Petrillo, Monica Ianniello, Roberto Sirica,Maurizio D'Amora, Antonio Fico"                                                                                                                                                                                                                                                    |
| EPI_ISL_1169490                                                                                                                                                                                                                                                                                                                                                                                                                                                                                                                                                                                                                                                                                                                                                                                                                                                                                                                                                                                                                                                                                                                                                                                                                                                                                                                            | OR State PHL-Virology/Immunology Section                                              | Genomics and Discovery, Respiratory Viruses Branch, Division of Viral Diseases, Centers for Disease Control and Prevention | Krista Queen, Yan Li, Ying Tao, Jing Zhang, Anna Uehara, Anna Montmayeur, Clinton R. Paden, Peter W. Cook, Rachel Marine, Mili Sheth, Jasmine Padilla, Sarah Nobles, Mark Burroughs, Lori Rowe, Haibin Wang, Ben L. Rambo-Martin, Dhvani Batra, Justin Lee, Suxiang Tong                                                                                                                                                                           |
| EPI_ISL_1169645, EPI_ISL_1169646, EPI_ISL_1169648, EPI_ISL_1169649, EPI_ISL_1169650, EPI_ISL_1169651, EPI_ISL_1169653, EPI_ISL_1169654, EPI_ISL_1169656, EPI_ISL_1169660, EPI_ISL_1169661, EPI_ISL_1169662, EPI_ISL_1169663, EPI_ISL_1169664, EPI_ISL_1169665, EPI_ISL_1169666, EPI_ISL_1169667, EPI_ISL_1169668, EPI_ISL_1169669, EPI_ISL_1169670, EPI_ISL_1169671, EPI_ISL_1169672, EPI_ISL_1169673, EPI_ISL_1169674, EPI_ISL_1169689, EPI_ISL_1169693, EPI_ISL_1169718, EPI_ISL_1169719, EPI_ISL_1169721, EPI_ISL_1169722, EPI_ISL_1169723, EPI_ISL_1169724, EPI_ISL_1169725, EPI_ISL_1169727, EPI_ISL_1169729, EPI_ISL_1169730, EPI_ISL_1169731, EPI_ISL_1169735, EPI_ISL_1169737, EPI_ISL_1169738, EPI_ISL_1169739, EPI_ISL_1169740, EPI_ISL_1169742, EPI_ISL_1169743, EPI_ISL_1169744, EPI_ISL_1169747, EPI_ISL_1169748, EPI_ISL_1169749, EPI_ISL_1169752, EPI_ISL_1169753, EPI_ISL_1169760, EPI_ISL_1169763, EPI_ISL_1169767, EPI_ISL_1169770, EPI_ISL_1169771, EPI_ISL_1169774, EPI_ISL_1169777, EPI_ISL_1169778, EPI_ISL_1169779, EPI_ISL_1169784, EPI_ISL_1169786, EPI_ISL_1169788, EPI_ISL_1169789, EPI_ISL_1169790, EPI_ISL_1169791, EPI_ISL_1169795, EPI_ISL_1169801, EPI_ISL_1169802, EPI_ISL_1169803, EPI_ISL_1169805, EPI_ISL_1169806, EPI_ISL_1169807, EPI_ISL_1169809, EPI_ISL_1169810, EPI_ISL_1169816, EPI_ISL_1169817 | Colorado Department of Public Health and Environment                                  | Colorado Department of Public Health and Environment                                                                       | Laura Bankers, Molly C. Hetherington-Rauth, Diana Ir, Shannon Ely, Shannon R. Matzinger, Sarah Elizabeth Totten, Emily A. Travanty                                                                                                                                                                                                                                                                                                                 |
| see above                                                                                                                                                                                                                                                                                                                                                                                                                                                                                                                                                                                                                                                                                                                                                                                                                                                                                                                                                                                                                                                                                                                                                                                                                                                                                                                                  | Hospital Universitari Joan XXIII de Tarragona                                         | Hospital Universitari Vall d'Hebron                                                                                        | Cristina Andrés, Maria Piñana, Josep F Abril, Damir Garcia-Cehic, Ariadna Rando, Juliana Esperalba, Maria Gema Codina, Carla Castillo, Maria Carmen Martin, Tomás Pumarola, Josep Quer, Andrés Antón                                                                                                                                                                                                                                               |
| EPI_ISL_1169853, EPI_ISL_1169854, EPI_ISL_1169855, EPI_ISL_1169856, EPI_ISL_1169857, EPI_ISL_1169858, EPI_ISL_1169859, EPI_ISL_1169861, EPI_ISL_1169862                                                                                                                                                                                                                                                                                                                                                                                                                                                                                                                                                                                                                                                                                                                                                                                                                                                                                                                                                                                                                                                                                                                                                                                    | Hospital Universitari Vall d'Hebron - Vall d'Hebron Institut de Rercerca              | Hospital Universitari Vall d'Hebron                                                                                        | Cristina Andrés, Maria Piñana, Josep F Abril, Damir Garcia-Cehic, Ariadna Rando, Juliana Esperalba, Maria Gema Codina, Carla Castillo, Maria Carmen Martin, Tomás Pumarola, Josep Quer, Andrés Antón                                                                                                                                                                                                                                               |
| EPI_ISL_1169867                                                                                                                                                                                                                                                                                                                                                                                                                                                                                                                                                                                                                                                                                                                                                                                                                                                                                                                                                                                                                                                                                                                                                                                                                                                                                                                            | Hospital Universitari Arnau de Vilanova                                               | Hospital Universitari Vall d'Hebron                                                                                        | Cristina Andrés, Maria Piñana, Josep F Abril, Damir Garcia-Cehic, Ariadna Rando, Juliana Esperalba, Maria Gema Codina, Carla Castillo, Maria Carmen Martin, Tomás Pumarola, Josep Quer, Andrés Antón                                                                                                                                                                                                                                               |
| EPI_ISL_1169868                                                                                                                                                                                                                                                                                                                                                                                                                                                                                                                                                                                                                                                                                                                                                                                                                                                                                                                                                                                                                                                                                                                                                                                                                                                                                                                            | Hospital Universitari Joan XXIII de Tarragona                                         | Hospital Universitari Vall d'Hebron                                                                                        | Cristina Andrés, Maria Piñana, Josep F Abril, Damir Garcia-Cehic, Ariadna Rando, Juliana Esperalba, Maria Gema Codina, Carla Castillo, Maria Carmen Martin, Tomás Pumarola, Josep Quer, Andrés Antón                                                                                                                                                                                                                                               |
| EPI_ISL_1169869                                                                                                                                                                                                                                                                                                                                                                                                                                                                                                                                                                                                                                                                                                                                                                                                                                                                                                                                                                                                                                                                                                                                                                                                                                                                                                                            | Hospital Universitari Vall d'Hebron - Vall d'Hebron Institut de Rercerca              | Hospital Universitari Vall d'Hebron                                                                                        | Cristina Andrés, Maria Piñana, Josep F Abril, Damir Garcia-Cehic, Ariadna Rando, Juliana Esperalba, Maria Gema Codina, Carla Castillo, Maria Carmen Martin, Tomás Pumarola, Josep Quer, Andrés Antón                                                                                                                                                                                                                                               |
| EPI_ISL_1169870, EPI_ISL_1169871, EPI_ISL_1169873                                                                                                                                                                                                                                                                                                                                                                                                                                                                                                                                                                                                                                                                                                                                                                                                                                                                                                                                                                                                                                                                                                                                                                                                                                                                                          | Hospital Universitari Arnau de Vilanova                                               | Hospital Universitari Vall d'Hebron                                                                                        | Cristina Andrés, Maria Piñana, Josep F Abril, Damir Garcia-Cehic, Ariadna Rando, Juliana Esperalba, Maria Gema Codina, Carla Castillo, Maria Carmen Martin, Tomás Pumarola, Josep Quer, Andrés Antón                                                                                                                                                                                                                                               |
| EPI_ISL_1169875, EPI_ISL_1169876, EPI_ISL_1169877, EPI_ISL_1169878, EPI_ISL_1169879, EPI_ISL_1169880                                                                                                                                                                                                                                                                                                                                                                                                                                                                                                                                                                                                                                                                                                                                                                                                                                                                                                                                                                                                                                                                                                                                                                                                                                       | Hospital Universitari Joan XXIII de Tarragona                                         | Hospital Universitari Vall d'Hebron                                                                                        | Cristina Andrés, Maria Piñana, Josep F Abril, Damir Garcia-Cehic, Ariadna Rando, Juliana Esperalba, Maria Gema Codina, Carla Castillo, Maria Carmen Martin, Tomás Pumarola, Josep Quer, Andrés Antón                                                                                                                                                                                                                                               |
| EPI_ISL_1169882                                                                                                                                                                                                                                                                                                                                                                                                                                                                                                                                                                                                                                                                                                                                                                                                                                                                                                                                                                                                                                                                                                                                                                                                                                                                                                                            | INMI Lazzaro Spallanzani IRCCS                                                        | INMI Lazzaro Spallanzani IRCCS                                                                                             | CEM Gruber, B Bartolini, E Giombini, F Messina, M Rueca, O Butera, MR Capobianchi, A Di Caro                                                                                                                                                                                                                                                                                                                                                       |
| EPI_ISL_1169883                                                                                                                                                                                                                                                                                                                                                                                                                                                                                                                                                                                                                                                                                                                                                                                                                                                                                                                                                                                                                                                                                                                                                                                                                                                                                                                            | INMI Lazzaro Spallanzani IRCCS                                                        | INMI Lazzaro Spallanzani IRCCS                                                                                             | F Messina, M Rueca, O Butera, CEM Gruber, B Bartolini, E Giombini, MR Capobianchi, A Di Caro                                                                                                                                                                                                                                                                                                                                                       |
| EPI_ISL_1169884                                                                                                                                                                                                                                                                                                                                                                                                                                                                                                                                                                                                                                                                                                                                                                                                                                                                                                                                                                                                                                                                                                                                                                                                                                                                                                                            | INMI Lazzaro Spallanzani IRCCS                                                        | INMI Lazzaro Spallanzani IRCCS                                                                                             | B Bartolini, E Giombini, F Messina, M Rueca, O Butera, CEM Gruber, A Di Caro, MR Capobianchi                                                                                                                                                                                                                                                                                                                                                       |
| EPI_ISL_1169886                                                                                                                                                                                                                                                                                                                                                                                                                                                                                                                                                                                                                                                                                                                                                                                                                                                                                                                                                                                                                                                                                                                                                                                                                                                                                                                            | San Gallicano Dermatological Institute I.F.O.                                         | INMI Lazzaro Spallanzani IRCCS                                                                                             | E Giombini, F Messina, M Rueca, O Butera, CEM Gruber, B Bartolini, F Pimpinelli, F Ensoli, EG Di Domenico, A Di Caro, MR Capobianchi                                                                                                                                                                                                                                                                                                               |
| EPI_ISL_1169887                                                                                                                                                                                                                                                                                                                                                                                                                                                                                                                                                                                                                                                                                                                                                                                                                                                                                                                                                                                                                                                                                                                                                                                                                                                                                                                            | San Gallicano Dermatological Institute I.F.O.                                         | INMI Lazzaro Spallanzani IRCCS                                                                                             | CEM Gruber, B Bartolini, E Giombini, F Messina, M Rueca, O Butera, F Pimpinelli, F Ensoli, G D'Agosto, MR Capobianchi, A Di Caro                                                                                                                                                                                                                                                                                                                   |
| EPI_ISL_1169889                                                                                                                                                                                                                                                                                                                                                                                                                                                                                                                                                                                                                                                                                                                                                                                                                                                                                                                                                                                                                                                                                                                                                                                                                                                                                                                            | Synlab Lazio S.r.l.                                                                   | INMI Lazzaro Spallanzani IRCCS                                                                                             | F Messina, M Rueca, O Butera, CEM Gruber, B Bartolini, E Giombini, E Trappolini, SA Santini, MR Capobianchi, A Di Caro                                                                                                                                                                                                                                                                                                                             |
| EPI_ISL_1169891                                                                                                                                                                                                                                                                                                                                                                                                                                                                                                                                                                                                                                                                                                                                                                                                                                                                                                                                                                                                                                                                                                                                                                                                                                                                                                                            | UOC Microbiologia e Virologia, Azienda Ospedaliera Universitaria Senese, Siena, Italy | Dipartimento di Biotecnologie Mediche                                                                                      | Maria Grazia Cusi, David Pinzausti, Claudia Gandolfo, Gabriele Anichini, Gianni Pozzi, Gianni Gori Savellini, Francesco Santoro                                                                                                                                                                                                                                                                                                                    |
| EPI_ISL_1169905, EPI_ISL_1169906, EPI_ISL_1169911                                                                                                                                                                                                                                                                                                                                                                                                                                                                                                                                                                                                                                                                                                                                                                                                                                                                                                                                                                                                                                                                                                                                                                                                                                                                                          | Ministry of Health Turkey                                                             | Ministry of Health Turkey                                                                                                  | Fatma Bayraktar, Yasemin Cosgun, Suleyman Yalcin, Gulay Korukluoglu                                                                                                                                                                                                                                                                                                                                                                                |
| EPI_ISL_1169977, EPI_ISL_1169980, EPI_ISL_1169981, EPI_ISL_1169983, EPI_ISL_1169984, EPI_ISL_1169990, EPI_ISL_1169991, EPI_ISL_1169995, EPI_ISL_1170001, EPI_ISL_1170002, EPI_ISL_1170003, EPI_ISL_1170005, EPI_ISL_1170006, EPI_ISL_1170010, EPI_ISL_1170011, EPI_ISL_1170021, EPI_ISL_1170024, EPI_ISL_1170026, EPI_ISL_1170028, EPI_ISL_1170030, EPI_ISL_1170032, EPI_ISL_1170033, EPI_ISL_1170045, EPI_ISL_1170046, EPI_ISL_1170049, EPI_ISL_1170051, EPI_ISL_1170052, EPI_ISL_1170053, EPI_ISL_1170054, EPI_ISL_1170061, EPI_ISL_1170066, EPI_ISL_1170069, EPI_ISL_1170071, EPI_ISL_1170075, EPI_ISL_1170079, EPI_ISL_1170080, EPI_ISL_1170083, EPI_ISL_1170091, EPI_ISL_1170096, EPI_ISL_1170097, EPI_ISL_1170098, EPI_ISL_1170099, EPI_ISL_1170102, EPI_ISL_1170104, EPI_ISL_1170109, EPI_ISL_1170114, EPI_ISL_1170115, EPI_ISL_1170120                                                                                                                                                                                                                                                                                                                                                                                                                                                                                             | Algemeen Medisch Laboratorium (AML)                                                   | UAntwerp, Laboratory of Medical Microbiology                                                                               | Basil Britto Xavier, Jasmine Coppens, Marie Le Mercier, Christine Lammens, Veerle Matheussen, Herman Goossens                                                                                                                                                                                                                                                                                                                                      |
| see above                                                                                                                                                                                                                                                                                                                                                                                                                                                                                                                                                                                                                                                                                                                                                                                                                                                                                                                                                                                                                                                                                                                                                                                                                                                                                                                                  | Department of Clinical Microbiology                                                   | GIGA Medical Genomics                                                                                                      | Keith Durkin, Maria Artesi, Sébastien Bontems, Raphaël Boreux, Bouchra Boujemla, Nathalie Renotte, Cécile Meex, Pierrette Melin, Marie-Pierre Hayette, Vincent Bours                                                                                                                                                                                                                                                                               |
| EPI_ISL_1171466, EPI_ISL_1171467, EPI_ISL_1171468, EPI_ISL_1171469, EPI_ISL_1171470, EPI_ISL_1171471, EPI_ISL_1171472, EPI_ISL_1171473                                                                                                                                                                                                                                                                                                                                                                                                                                                                                                                                                                                                                                                                                                                                                                                                                                                                                                                                                                                                                                                                                                                                                                                                     | SYNLAB                                                                                | GIGA Medical Genomics                                                                                                      | Keith Durkin, Maria Artesi, Sébastien Bontems, Raphaël Boreux, Bouchra Boujemla, Nathalie Renotte, Cécile Meex, Pierrette Melin, Marie-Pierre Hayette, Vincent Bours                                                                                                                                                                                                                                                                               |
| EPI_ISL_1171485, EPI_ISL_1171487                                                                                                                                                                                                                                                                                                                                                                                                                                                                                                                                                                                                                                                                                                                                                                                                                                                                                                                                                                                                                                                                                                                                                                                                                                                                                                           | I.F.A.C. Hopital Princesse Paola                                                      | GIGA Medical Genomics                                                                                                      | Keith Durkin, Maria Artesi, Sébastien Bontems, Raphaël Boreux, Bouchra Boujemla, Nathalie Renotte, Cécile Meex, Pierrette Melin, Marie-Pierre Hayette, Vincent Bours                                                                                                                                                                                                                                                                               |
| EPI_ISL_1171503                                                                                                                                                                                                                                                                                                                                                                                                                                                                                                                                                                                                                                                                                                                                                                                                                                                                                                                                                                                                                                                                                                                                                                                                                                                                                                                            | SYNLAB                                                                                | GIGA Medical Genomics                                                                                                      | Keith Durkin, Maria Artesi, Sébastien Bontems, Raphaël Boreux, Bouchra Boujemla, Nathalie Renotte, Cécile Meex, Pierrette Melin, Marie-Pierre Hayette, Vincent Bours                                                                                                                                                                                                                                                                               |
| EPI_ISL_1171572, EPI_ISL_1171582                                                                                                                                                                                                                                                                                                                                                                                                                                                                                                                                                                                                                                                                                                                                                                                                                                                                                                                                                                                                                                                                                                                                                                                                                                                                                                           | SYNLAB                                                                                | GIGA Medical Genomics                                                                                                      | Keith Durkin, Maria Artesi, Sébastien Bontems, Raphaël Boreux, Bouchra Boujemla, Nathalie Renotte, Cécile Meex, Pierrette Melin, Marie-Pierre Hayette, Vincent Bours                                                                                                                                                                                                                                                                               |
| EPI_ISL_1171588, EPI_ISL_1171593, EPI_ISL_1171610                                                                                                                                                                                                                                                                                                                                                                                                                                                                                                                                                                                                                                                                                                                                                                                                                                                                                                                                                                                                                                                                                                                                                                                                                                                                                          |                                                                                       |                                                                                                                            |                                                                                                                                                                                                                                                                                                                                                                                                                                                    |

|                                                                                                                                                                                                                                                                                                                                                                                                                        |                                                                                                 |                                                                                  |                                                                                                                                                                                                                                                                                                             |
|------------------------------------------------------------------------------------------------------------------------------------------------------------------------------------------------------------------------------------------------------------------------------------------------------------------------------------------------------------------------------------------------------------------------|-------------------------------------------------------------------------------------------------|----------------------------------------------------------------------------------|-------------------------------------------------------------------------------------------------------------------------------------------------------------------------------------------------------------------------------------------------------------------------------------------------------------|
| EPI_ISL_1171642                                                                                                                                                                                                                                                                                                                                                                                                        | IAL Regional de Marilia                                                                         | Instituto Adolfo Lutz, Interdisciplinary Procedures Center, Strategic Laboratory | Claudio Tavares Sacchi, Claudia Regina Gonçalves, Erica Valesa Ramos Gomes, Karoline Rodrigues Campos, Caio Vinicius Dias Lopes                                                                                                                                                                             |
| EPI_ISL_1171651, EPI_ISL_1171652, EPI_ISL_1171654, EPI_ISL_1171655, EPI_ISL_1171659, EPI_ISL_1171660, EPI_ISL_1171661, EPI_ISL_1171662, EPI_ISL_1171663, EPI_ISL_1171667, EPI_ISL_1171673                                                                                                                                                                                                                              |                                                                                                 |                                                                                  |                                                                                                                                                                                                                                                                                                             |
| see above                                                                                                                                                                                                                                                                                                                                                                                                              | IAL Regional de Presidente Prudente                                                             | Instituto Adolfo Lutz, Interdisciplinary Procedures Center, Strategic Laboratory | Claudio Tavares Sacchi, Claudia Regina Gonçalves, Erica Valesa Ramos Gomes, Karoline Rodrigues Campos, Caio Vinicius Dias Lopes                                                                                                                                                                             |
| EPI_ISL_1171679, EPI_ISL_1171692, EPI_ISL_1171693, EPI_ISL_1171698, EPI_ISL_1171699, EPI_ISL_1171703                                                                                                                                                                                                                                                                                                                   | UOC LAB ANALISI PO CARDARELLI CAMPOBASSO                                                        | Istituto Zooprofilattico Sperimentale dell'Abruzzo e Molise "G. Caporale"        | Scutellà M, Niro G, Felice V. Lorusso A, Marcacci M, Di Domenico M, Ancora M, Curini V, Mangone I, Rinaldi A, Scialabba S, Di Pasquale A, Cammà C, Puglia I, Calistri P, Savini G                                                                                                                           |
| EPI_ISL_1171711                                                                                                                                                                                                                                                                                                                                                                                                        | Baylor Scott & White-Temple                                                                     | Baylor Scott & White-Temple                                                      | Ari Rao, Linden Morales, Kimberly Walker, Marcus Volz, Shelby Hendrickson, Caitlin Maloney                                                                                                                                                                                                                  |
| EPI_ISL_1171772, EPI_ISL_1171773, EPI_ISL_1171774, EPI_ISL_1171776, EPI_ISL_1171777, EPI_ISL_1171779, EPI_ISL_1171784, EPI_ISL_1171785, EPI_ISL_1171786, EPI_ISL_1171790, EPI_ISL_1171792, EPI_ISL_1171794, EPI_ISL_1171797, EPI_ISL_1171798, EPI_ISL_1171799, EPI_ISL_1171800, EPI_ISL_1171801, EPI_ISL_1171803, EPI_ISL_1171804, EPI_ISL_1171806, EPI_ISL_1171811, EPI_ISL_1171816, EPI_ISL_1171821, EPI_ISL_1171832 |                                                                                                 |                                                                                  |                                                                                                                                                                                                                                                                                                             |
| see above                                                                                                                                                                                                                                                                                                                                                                                                              | Johns Hopkins Hospital Department of Pathology                                                  | Johns Hopkins Hospital Department of Pathology                                   | C. Paul Morris, Chun Huai Luo, Adannaya Amadi, Matthew Schwartz, Nicholas Gallagher, Heba H. Mostafa                                                                                                                                                                                                        |
| EPI_ISL_1171872, EPI_ISL_1171877, EPI_ISL_1171885, EPI_ISL_1171892, EPI_ISL_1171894, EPI_ISL_1171906, EPI_ISL_1171914, EPI_ISL_1171935, EPI_ISL_1171941, EPI_ISL_1171948, EPI_ISL_1171964, EPI_ISL_1171965                                                                                                                                                                                                             |                                                                                                 |                                                                                  |                                                                                                                                                                                                                                                                                                             |
| see above                                                                                                                                                                                                                                                                                                                                                                                                              | Ministry of Health Turkey                                                                       | Ministry of Health Turkey                                                        | Fatma Bayrakdar, Yasemin Cosgun, Suleyman Yalcin, Gulay Korukluoglu                                                                                                                                                                                                                                         |
| EPI_ISL_1171966, EPI_ISL_1171971, EPI_ISL_1171974, EPI_ISL_1171975, EPI_ISL_1171976, EPI_ISL_1171977, EPI_ISL_1171981, EPI_ISL_1171987, EPI_ISL_1171992, EPI_ISL_1171995                                                                                                                                                                                                                                               | Instituto Nacional de Saude (INSA)                                                              | Instituto Nacional de Saude (INSA)                                               | Borges et al                                                                                                                                                                                                                                                                                                |
| EPI_ISL_1172018, EPI_ISL_1172019                                                                                                                                                                                                                                                                                                                                                                                       | Baylor Scott & White-Temple                                                                     | Baylor Scott & White-Temple                                                      | Ari Rao, Linden Morales, Kimberly Walker, Marcus Volz, Shelby Hendrickson, Caitlin Maloney                                                                                                                                                                                                                  |
| EPI_ISL_1172020                                                                                                                                                                                                                                                                                                                                                                                                        | Baylor Scott & White-Irving                                                                     | Baylor Scott & White-Temple                                                      | Ari Rao, Linden Morales, Kimberly Walker, Marcus Volz, Shelby Hendrickson, Caitlin Maloney                                                                                                                                                                                                                  |
| EPI_ISL_1172021                                                                                                                                                                                                                                                                                                                                                                                                        | Baylor Scott & White-Temple                                                                     | Baylor Scott & White-Temple                                                      | Ari Rao, Linden Morales, Kimberly Walker, Marcus Volz, Shelby Hendrickson, Caitlin Maloney                                                                                                                                                                                                                  |
| EPI_ISL_950681, EPI_ISL_950683, EPI_ISL_950687, EPI_ISL_950690, EPI_ISL_950694, EPI_ISL_950721, EPI_ISL_950723, EPI_ISL_950724                                                                                                                                                                                                                                                                                         | Queens Medical Centre, Clinical Microbiology Department / DeepSeq Nottingham                    | COVID-19 Genomics UK (COG-UK) Consortium                                         | Gemma Clark, Wendy Smith, Manjinder Khakh, Vicki M Fleming, Michelle M Lister, Hannah Howson-Wells, Jonathan Ball, Patrick McClure, Joseph Chappell, Theocharis Tsoleridis, Nadine Holmes, Matthew Carlisle, Christopher Moore, Fei Sang, Johnny Debebe, Victoria Wright, Matthew Loose                     |
| EPI_ISL_953376, EPI_ISL_953377, EPI_ISL_953379, EPI_ISL_953439, EPI_ISL_953440, EPI_ISL_953443, EPI_ISL_953447, EPI_ISL_953448, EPI_ISL_953474, EPI_ISL_953487                                                                                                                                                                                                                                                         | Jessa                                                                                           | Jessa                                                                            | Jessa_cmdLab                                                                                                                                                                                                                                                                                                |
| EPI_ISL_954764, EPI_ISL_954765, EPI_ISL_954767, EPI_ISL_954768, EPI_ISL_954769, EPI_ISL_954770, EPI_ISL_954772, EPI_ISL_954773, EPI_ISL_954774                                                                                                                                                                                                                                                                         | AZDelta                                                                                         | AZDelta                                                                          | Geert Martens; Dieter De Smet                                                                                                                                                                                                                                                                               |
| EPI_ISL_955105                                                                                                                                                                                                                                                                                                                                                                                                         | Maryland Public Health Laboratory                                                               | Maryland Public Health Laboratory                                                | Maryland Department of Health Laboratories Administration                                                                                                                                                                                                                                                   |
| EPI_ISL_955221                                                                                                                                                                                                                                                                                                                                                                                                         | Indiana Animal Disease Diagnostic Laboratory                                                    | Carpi Laboratory - Purdue University                                             | Jack Dorman, Ilinca I Ciubotariu, Lev Gorenstein, Abebe A Fola, G Kenitra Hendrix, Rebecca P Wilkes, Giovanna Carpi                                                                                                                                                                                         |
| EPI_ISL_955937                                                                                                                                                                                                                                                                                                                                                                                                         | University of Michigan Clinical Microbiology Laboratory                                         | Lauring Lab, University of Michigan, Department of Microbiology and Immunology   | Valesano                                                                                                                                                                                                                                                                                                    |
| EPI_ISL_957073, EPI_ISL_957089, EPI_ISL_957103, EPI_ISL_957115, EPI_ISL_957150, EPI_ISL_957212, EPI_ISL_957225, EPI_ISL_957263, EPI_ISL_957279, EPI_ISL_957283, EPI_ISL_957287, EPI_ISL_957289, EPI_ISL_957314, EPI_ISL_957334                                                                                                                                                                                         |                                                                                                 |                                                                                  |                                                                                                                                                                                                                                                                                                             |
| see above                                                                                                                                                                                                                                                                                                                                                                                                              | Lighthouse Lab in Glasgow                                                                       | Wellcome Sanger Institute for the COVID-19 Genomics UK (COG-UK) Consortium       | Harper VanSteenhouse, Yumi Kasai, David Gray, Carol Clugston, Anna Dominiczak and Alex Alderton, Roberto Amato, Sonia Goncalves, Ewan Harrison, David K. Jackson, Ian Johnston, Dominic Kwiatkowski, Cordelia Langford, John Sillitoe on behalf of the Wellcome Sanger Institute COVID-19 Surveillance Team |
| EPI_ISL_959605                                                                                                                                                                                                                                                                                                                                                                                                         | Institute of Virology, Biomedical Research Center of the Slovak Academy of Sciences, Bratislava | Faculty of Natural Sciences, Comenius University, Bratislava                     | Broa Brejová, Viktória abanová, Kristína Boršová, Viktória Hodorová, Sabina Fumaová Havlíková, Juraj Kopáek, Martina Liková, ubomíra Lukáiková, Martina Neboháová, Monika Sláviková, Tomáš Vína, Jozef Nosek, Boris Klempa                                                                                  |
| EPI_ISL_959613                                                                                                                                                                                                                                                                                                                                                                                                         | Institute of Virology, Biomedical Research Center of the Slovak Academy of Sciences, Bratislava | Faculty of Natural Sciences, Comenius University, Bratislava                     | Viktória abanová, Kristína Boršová, Broa Brejová, Viktória Hodorová, Sabina Fumaová Havlíková, Juraj Kopáek, Martina Liková, ubomíra Lukáiková, Martina Neboháová, Monika Sláviková, Tomáš Vína, Jozef Nosek, Boris Klempa                                                                                  |
| EPI_ISL_960185, EPI_ISL_960187                                                                                                                                                                                                                                                                                                                                                                                         | Jessa                                                                                           | Jessa                                                                            | Jessa_cmdLab                                                                                                                                                                                                                                                                                                |
| EPI_ISL_960891, EPI_ISL_960892, EPI_ISL_960894, EPI_ISL_960895, EPI_ISL_960896                                                                                                                                                                                                                                                                                                                                         | Landesamt für Verbraucherschutz Sachsen Anhalt, Magdeburg                                       | Institute of Medical Microbiology and Hospital Hygiene                           | Prof. Dr. Achim Kaasch, Aljoscha Tersteegen                                                                                                                                                                                                                                                                 |
| EPI_ISL_960900, EPI_ISL_960901                                                                                                                                                                                                                                                                                                                                                                                         | Institute of Medical Microbiology and Hospital Hygiene                                          | Institute of Medical Microbiology and Hospital Hygiene                           | Prof. Dr. Achim Kaasch, Aljoscha Tersteegen                                                                                                                                                                                                                                                                 |
| EPI_ISL_960935, EPI_ISL_960936, EPI_ISL_960937, EPI_ISL_960938, EPI_ISL_960940                                                                                                                                                                                                                                                                                                                                         | Landesamt für Verbraucherschutz Sachsen Anhalt, Magdeburg                                       | Institute of Medical Microbiology and Hospital Hygiene                           | Prof. Dr. Achim Kaasch, Aljoscha Tersteegen                                                                                                                                                                                                                                                                 |
| EPI_ISL_961181, EPI_ISL_961182, EPI_ISL_961186, EPI_ISL_961187, EPI_ISL_961188, EPI_ISL_961192, EPI_ISL_961193, EPI_ISL_961194, EPI_ISL_961195, EPI_ISL_961196, EPI_ISL_961201, EPI_ISL_961202, EPI_ISL_961203                                                                                                                                                                                                         |                                                                                                 |                                                                                  |                                                                                                                                                                                                                                                                                                             |
| see above                                                                                                                                                                                                                                                                                                                                                                                                              | AZDelta                                                                                         | AZDelta                                                                          | Geert Martens; Dieter De Smet                                                                                                                                                                                                                                                                               |
| EPI_ISL_961714, EPI_ISL_961717                                                                                                                                                                                                                                                                                                                                                                                         | SIESP CHIETI - DRIVE IN CHIETI                                                                  | Istituto Zooprofilattico Sperimentale dell'Abruzzo e Molise "G. Caporale"        | Lorusso A, Marcacci M, Di Domenico M, Ancora M, Curini V, Mangone I, Rinaldi A, Scialabba S, Di Pasquale A, Cammà C, Puglia I, Calistri P, Savini G                                                                                                                                                         |
| EPI_ISL_961719, EPI_ISL_961721, EPI_ISL_961722                                                                                                                                                                                                                                                                                                                                                                         | SIESP CHIETI - DRIVE IN ORTONA                                                                  | Istituto Zooprofilattico Sperimentale dell'Abruzzo e Molise "G. Caporale"        | Lorusso A, Marcacci M, Di Domenico M, Ancora M, Curini V, Mangone I, Rinaldi A, Scialabba S, Di Pasquale A, Cammà C, Puglia I, Calistri P, Savini G                                                                                                                                                         |
| EPI_ISL_961728                                                                                                                                                                                                                                                                                                                                                                                                         | SIESP DIPARTIMENTO DI PREVENZIONE CHIETI                                                        | Istituto Zooprofilattico Sperimentale dell'Abruzzo e Molise "G. Caporale"        | Lorusso A, Marcacci M, Di Domenico M, Ancora M, Curini V, Mangone I, Rinaldi A, Scialabba S, Di Pasquale A, Cammà C, Puglia I, Calistri P, Savini G                                                                                                                                                         |
| EPI_ISL_961729                                                                                                                                                                                                                                                                                                                                                                                                         | SIESP CHIETI - DRIVE IN CHIETI                                                                  | Istituto Zooprofilattico Sperimentale dell'Abruzzo e Molise "G. Caporale"        | Lorusso A, Marcacci M, Di Domenico M, Ancora M, Curini V, Mangone I, Rinaldi A, Scialabba S, Di Pasquale A, Cammà C, Puglia I, Calistri P, Savini G                                                                                                                                                         |
| EPI_ISL_961734                                                                                                                                                                                                                                                                                                                                                                                                         | Dipartimento Prevenzione Avezzano-Servizio Igiene epidemiologia Sanità Pubblica                 | Istituto Zooprofilattico Sperimentale dell'Abruzzo e Molise "G. Caporale"        | Lorusso A, Marcacci M, Di Domenico M, Ancora M, Curini V, Mangone I, Rinaldi A, Scialabba S, Di Pasquale A, Cammà C, Puglia I, Calistri P, Savini G                                                                                                                                                         |
| EPI_ISL_961736, EPI_ISL_961740                                                                                                                                                                                                                                                                                                                                                                                         | SIESP CHIETI - DRIVE IN CHIETI                                                                  | Istituto Zooprofilattico Sperimentale dell'Abruzzo e Molise "G. Caporale"        | Lorusso A, Marcacci M, Di Domenico M, Ancora M, Curini V, Mangone I, Rinaldi A, Scialabba S, Di Pasquale A, Cammà C, Puglia I, Calistri P, Savini G                                                                                                                                                         |

|                                                                                                                                                                                                                                                                                                                                                                                                                                                                                                                                                                                                                                                                                                                                                                                                                                                                                                                                                                                                                                                                                                                                                                                                                                                                                                                                                                                                                                                                                                                                                                                                                                                                                                                                                                                                                                                                                                                                                                                                                                                                                                                                                                                                                                                                                                                                                                                                                                                                                                                                                                                                                                                                                                                                                                                                                                                                                                                                                                                                                                                                                                                                                                                                                                                                                                                                                                                |                                                                                                                                                   |                                                                                                 |                                                                                                                                                                                                                                                                                                             |
|--------------------------------------------------------------------------------------------------------------------------------------------------------------------------------------------------------------------------------------------------------------------------------------------------------------------------------------------------------------------------------------------------------------------------------------------------------------------------------------------------------------------------------------------------------------------------------------------------------------------------------------------------------------------------------------------------------------------------------------------------------------------------------------------------------------------------------------------------------------------------------------------------------------------------------------------------------------------------------------------------------------------------------------------------------------------------------------------------------------------------------------------------------------------------------------------------------------------------------------------------------------------------------------------------------------------------------------------------------------------------------------------------------------------------------------------------------------------------------------------------------------------------------------------------------------------------------------------------------------------------------------------------------------------------------------------------------------------------------------------------------------------------------------------------------------------------------------------------------------------------------------------------------------------------------------------------------------------------------------------------------------------------------------------------------------------------------------------------------------------------------------------------------------------------------------------------------------------------------------------------------------------------------------------------------------------------------------------------------------------------------------------------------------------------------------------------------------------------------------------------------------------------------------------------------------------------------------------------------------------------------------------------------------------------------------------------------------------------------------------------------------------------------------------------------------------------------------------------------------------------------------------------------------------------------------------------------------------------------------------------------------------------------------------------------------------------------------------------------------------------------------------------------------------------------------------------------------------------------------------------------------------------------------------------------------------------------------------------------------------------------|---------------------------------------------------------------------------------------------------------------------------------------------------|-------------------------------------------------------------------------------------------------|-------------------------------------------------------------------------------------------------------------------------------------------------------------------------------------------------------------------------------------------------------------------------------------------------------------|
| EPI_ISL_961744                                                                                                                                                                                                                                                                                                                                                                                                                                                                                                                                                                                                                                                                                                                                                                                                                                                                                                                                                                                                                                                                                                                                                                                                                                                                                                                                                                                                                                                                                                                                                                                                                                                                                                                                                                                                                                                                                                                                                                                                                                                                                                                                                                                                                                                                                                                                                                                                                                                                                                                                                                                                                                                                                                                                                                                                                                                                                                                                                                                                                                                                                                                                                                                                                                                                                                                                                                 | SIESP CHIETI - DRIVE IN ORTONA                                                                                                                    | Istituto Zooprofilattico Sperimentale dell'Abruzzo e Molise "G. Caporale"                       | Lorusso A, Marcacci M, Di Domenico M, Ancora M, Curini V, Mangone I, Rinaldi A, Scialabba S, Di Pasquale A, Cammà C, Puglia I, Calistri P, Savini G                                                                                                                                                         |
| EPI_ISL_961749                                                                                                                                                                                                                                                                                                                                                                                                                                                                                                                                                                                                                                                                                                                                                                                                                                                                                                                                                                                                                                                                                                                                                                                                                                                                                                                                                                                                                                                                                                                                                                                                                                                                                                                                                                                                                                                                                                                                                                                                                                                                                                                                                                                                                                                                                                                                                                                                                                                                                                                                                                                                                                                                                                                                                                                                                                                                                                                                                                                                                                                                                                                                                                                                                                                                                                                                                                 | SIESP DIPARTIMENTO DI PREVENZIONE CHIETI                                                                                                          | Istituto Zooprofilattico Sperimentale dell'Abruzzo e Molise "G. Caporale"                       | Lorusso A, Marcacci M, Di Domenico M, Ancora M, Curini V, Mangone I, Rinaldi A, Scialabba S, Di Pasquale A, Cammà C, Puglia I, Calistri P, Savini G                                                                                                                                                         |
| EPI_ISL_964349, EPI_ISL_964352, EPI_ISL_964355, EPI_ISL_964358, EPI_ISL_964360, EPI_ISL_964368, EPI_ISL_964369, EPI_ISL_964384, EPI_ISL_964387, EPI_ISL_964388, EPI_ISL_964396, EPI_ISL_964409, EPI_ISL_964413, EPI_ISL_964415, EPI_ISL_964416, EPI_ISL_964417, EPI_ISL_964425, EPI_ISL_964430, EPI_ISL_964433, EPI_ISL_964437, EPI_ISL_964440, EPI_ISL_964441, EPI_ISL_964442, EPI_ISL_964452, EPI_ISL_964456, EPI_ISL_964458, EPI_ISL_964468, EPI_ISL_964469, EPI_ISL_964471, EPI_ISL_964472, EPI_ISL_964473, EPI_ISL_964476, EPI_ISL_964482, EPI_ISL_964483, EPI_ISL_964484, EPI_ISL_964488, EPI_ISL_964489, EPI_ISL_964493, EPI_ISL_964494, EPI_ISL_964503, EPI_ISL_964504, EPI_ISL_964508, EPI_ISL_964509, EPI_ISL_964511, EPI_ISL_964516, EPI_ISL_964518, EPI_ISL_964520, EPI_ISL_964523, EPI_ISL_964527, EPI_ISL_964532, EPI_ISL_964533, EPI_ISL_964540                                                                                                                                                                                                                                                                                                                                                                                                                                                                                                                                                                                                                                                                                                                                                                                                                                                                                                                                                                                                                                                                                                                                                                                                                                                                                                                                                                                                                                                                                                                                                                                                                                                                                                                                                                                                                                                                                                                                                                                                                                                                                                                                                                                                                                                                                                                                                                                                                                                                                                                 |                                                                                                                                                   |                                                                                                 |                                                                                                                                                                                                                                                                                                             |
| see above                                                                                                                                                                                                                                                                                                                                                                                                                                                                                                                                                                                                                                                                                                                                                                                                                                                                                                                                                                                                                                                                                                                                                                                                                                                                                                                                                                                                                                                                                                                                                                                                                                                                                                                                                                                                                                                                                                                                                                                                                                                                                                                                                                                                                                                                                                                                                                                                                                                                                                                                                                                                                                                                                                                                                                                                                                                                                                                                                                                                                                                                                                                                                                                                                                                                                                                                                                      | Lighthouse Lab in Glasgow                                                                                                                         | Wellcome Sanger Institute for the COVID-19 Genomics UK (COG-UK) Consortium                      | Harper VanSteenhouse, Yumi Kasai, David Gray, Carol Clugston, Anna Dominiczak and Alex Alderton, Roberto Amato, Sonia Goncalves, Ewan Harrison, David K. Jackson, Ian Johnston, Dominic Kwiatkowski, Cordelia Langford, John Sillitoe on behalf of the Wellcome Sanger Institute COVID-19 Surveillance Team |
| EPI_ISL_964837                                                                                                                                                                                                                                                                                                                                                                                                                                                                                                                                                                                                                                                                                                                                                                                                                                                                                                                                                                                                                                                                                                                                                                                                                                                                                                                                                                                                                                                                                                                                                                                                                                                                                                                                                                                                                                                                                                                                                                                                                                                                                                                                                                                                                                                                                                                                                                                                                                                                                                                                                                                                                                                                                                                                                                                                                                                                                                                                                                                                                                                                                                                                                                                                                                                                                                                                                                 | Lighthouse Lab in Alderley Park                                                                                                                   | Wellcome Sanger Institute for the COVID-19 Genomics UK (COG-UK) Consortium                      | Jacquelyn Wynn, Mairead Hyland, The Lighthouse Lab in Alderley Park and Alex Alderton, Roberto Amato, Sonia Goncalves, Ewan Harrison, David K. Jackson, Ian Johnston, Dominic Kwiatkowski, Cordelia Langford, John Sillitoe on behalf of the Wellcome Sanger Institute COVID-19 Surveillance Team           |
| EPI_ISL_965025                                                                                                                                                                                                                                                                                                                                                                                                                                                                                                                                                                                                                                                                                                                                                                                                                                                                                                                                                                                                                                                                                                                                                                                                                                                                                                                                                                                                                                                                                                                                                                                                                                                                                                                                                                                                                                                                                                                                                                                                                                                                                                                                                                                                                                                                                                                                                                                                                                                                                                                                                                                                                                                                                                                                                                                                                                                                                                                                                                                                                                                                                                                                                                                                                                                                                                                                                                 | S.C. Microbiologia e Virologia Laboratorio Virologia -Speciale Centro Influenza - AOU di Sassari - Viale san Pietro 43/B Palazzo Infettivologia   | Laboratorio specialistico UOC Ematologia - Ospedale "San Francesco" - ATS-ASSL Nuoro            | Piras Giovanna, Malune Paolo, Asproni Rosanna, Monne Maria Itria, Palmas Angelo Domenico Serra Caterina, Rimini Elena, Rubino Salvatore                                                                                                                                                                     |
| EPI_ISL_965028, EPI_ISL_965031                                                                                                                                                                                                                                                                                                                                                                                                                                                                                                                                                                                                                                                                                                                                                                                                                                                                                                                                                                                                                                                                                                                                                                                                                                                                                                                                                                                                                                                                                                                                                                                                                                                                                                                                                                                                                                                                                                                                                                                                                                                                                                                                                                                                                                                                                                                                                                                                                                                                                                                                                                                                                                                                                                                                                                                                                                                                                                                                                                                                                                                                                                                                                                                                                                                                                                                                                 | Laboratorio Biologia Molecolare Sars Cov2 - UOC Laboratorio Analisi - Servizio Medicina di Laboratorio, Ospedale "San Francesco" - ATS-ASSL Nuoro | Laboratorio specialistico UOC Ematologia - Ospedale "San Francesco" - ATS-ASSL Nuoro            | Piras Giovanna, Asproni Rosanna, Malune Paolo, Fiamma Maura, Monne Maria Itria, Palmas Angelo Domenico, Lo Maglio Iana, Mameli Giuseppe                                                                                                                                                                     |
| EPI_ISL_978788, EPI_ISL_978789, EPI_ISL_978790, EPI_ISL_978792, EPI_ISL_978795, EPI_ISL_978796, EPI_ISL_978800, EPI_ISL_978802, EPI_ISL_978803, EPI_ISL_978804, EPI_ISL_978812, EPI_ISL_978817, EPI_ISL_978819, EPI_ISL_978824, EPI_ISL_978825, EPI_ISL_978831, EPI_ISL_978832, EPI_ISL_978833, EPI_ISL_978836, EPI_ISL_978842, EPI_ISL_978844, EPI_ISL_978849, EPI_ISL_978851, EPI_ISL_978853, EPI_ISL_978856, EPI_ISL_978859, EPI_ISL_978865, EPI_ISL_978872, EPI_ISL_978875, EPI_ISL_978876, EPI_ISL_978879                                                                                                                                                                                                                                                                                                                                                                                                                                                                                                                                                                                                                                                                                                                                                                                                                                                                                                                                                                                                                                                                                                                                                                                                                                                                                                                                                                                                                                                                                                                                                                                                                                                                                                                                                                                                                                                                                                                                                                                                                                                                                                                                                                                                                                                                                                                                                                                                                                                                                                                                                                                                                                                                                                                                                                                                                                                                 |                                                                                                                                                   |                                                                                                 |                                                                                                                                                                                                                                                                                                             |
| see above                                                                                                                                                                                                                                                                                                                                                                                                                                                                                                                                                                                                                                                                                                                                                                                                                                                                                                                                                                                                                                                                                                                                                                                                                                                                                                                                                                                                                                                                                                                                                                                                                                                                                                                                                                                                                                                                                                                                                                                                                                                                                                                                                                                                                                                                                                                                                                                                                                                                                                                                                                                                                                                                                                                                                                                                                                                                                                                                                                                                                                                                                                                                                                                                                                                                                                                                                                      | AZDelta                                                                                                                                           | AZDelta                                                                                         | Geert Martens; Dieter De Smet                                                                                                                                                                                                                                                                               |
| EPI_ISL_979358, EPI_ISL_979360, EPI_ISL_979361                                                                                                                                                                                                                                                                                                                                                                                                                                                                                                                                                                                                                                                                                                                                                                                                                                                                                                                                                                                                                                                                                                                                                                                                                                                                                                                                                                                                                                                                                                                                                                                                                                                                                                                                                                                                                                                                                                                                                                                                                                                                                                                                                                                                                                                                                                                                                                                                                                                                                                                                                                                                                                                                                                                                                                                                                                                                                                                                                                                                                                                                                                                                                                                                                                                                                                                                 | Microbiological Diagnostic Unit - Public Health Laboratory (MDU-PHL)                                                                              | MDU-PHL                                                                                         | Seemann T., Sait, M.L., Sherry, N.L.                                                                                                                                                                                                                                                                        |
| EPI_ISL_979362, EPI_ISL_979363, EPI_ISL_979364                                                                                                                                                                                                                                                                                                                                                                                                                                                                                                                                                                                                                                                                                                                                                                                                                                                                                                                                                                                                                                                                                                                                                                                                                                                                                                                                                                                                                                                                                                                                                                                                                                                                                                                                                                                                                                                                                                                                                                                                                                                                                                                                                                                                                                                                                                                                                                                                                                                                                                                                                                                                                                                                                                                                                                                                                                                                                                                                                                                                                                                                                                                                                                                                                                                                                                                                 | Victorian Infectious Diseases Reference Laboratory (VIDRL)                                                                                        | VIDRL and MDU-PHL                                                                               | Caly L., Seemann T., Sait, M.L., Druce J., Sherry, N.L.                                                                                                                                                                                                                                                     |
| EPI_ISL_979964, EPI_ISL_979965, EPI_ISL_979966, EPI_ISL_979967, EPI_ISL_979968, EPI_ISL_979969                                                                                                                                                                                                                                                                                                                                                                                                                                                                                                                                                                                                                                                                                                                                                                                                                                                                                                                                                                                                                                                                                                                                                                                                                                                                                                                                                                                                                                                                                                                                                                                                                                                                                                                                                                                                                                                                                                                                                                                                                                                                                                                                                                                                                                                                                                                                                                                                                                                                                                                                                                                                                                                                                                                                                                                                                                                                                                                                                                                                                                                                                                                                                                                                                                                                                 | National Institute of Infectious Diseases-Prof. Dr. Matei Bals Molecular Diagnostics Laboratory                                                   | National Institute of Infectious Diseases-Prof. Dr. Matei Bals Molecular Diagnostics Laboratory | Leontina Banica, Marius Surleac, Corina Casangiu, Petre Milu, Andreea Tudor, Simona Paraschiv, Dan Otelea                                                                                                                                                                                                   |
| EPI_ISL_980235, EPI_ISL_980236, EPI_ISL_980237, EPI_ISL_980238, EPI_ISL_980239, EPI_ISL_980240, EPI_ISL_980242, EPI_ISL_980243, EPI_ISL_980245, EPI_ISL_980246, EPI_ISL_980249, EPI_ISL_980251, EPI_ISL_980253, EPI_ISL_980254, EPI_ISL_980255, EPI_ISL_980257, EPI_ISL_980260, EPI_ISL_980261, EPI_ISL_980264, EPI_ISL_980265, EPI_ISL_980267, EPI_ISL_980269, EPI_ISL_980270, EPI_ISL_980271, EPI_ISL_980273, EPI_ISL_980275, EPI_ISL_980276, EPI_ISL_980277, EPI_ISL_980279, EPI_ISL_980280, EPI_ISL_980281, EPI_ISL_980282, EPI_ISL_980283, EPI_ISL_980284, EPI_ISL_980285, EPI_ISL_980286, EPI_ISL_980288, EPI_ISL_980289, EPI_ISL_980290, EPI_ISL_980291, EPI_ISL_980292, EPI_ISL_980293, EPI_ISL_980297, EPI_ISL_980298, EPI_ISL_980299, EPI_ISL_980300, EPI_ISL_980303, EPI_ISL_980306, EPI_ISL_980307, EPI_ISL_980308, EPI_ISL_980310, EPI_ISL_980311, EPI_ISL_980312, EPI_ISL_980313, EPI_ISL_980314, EPI_ISL_980315, EPI_ISL_980316, EPI_ISL_980317, EPI_ISL_980318, EPI_ISL_980321, EPI_ISL_980322, EPI_ISL_980323, EPI_ISL_980324, EPI_ISL_980326, EPI_ISL_980327, EPI_ISL_980328, EPI_ISL_980329, EPI_ISL_980330, EPI_ISL_980331, EPI_ISL_980332, EPI_ISL_980336, EPI_ISL_980337, EPI_ISL_980339, EPI_ISL_980342, EPI_ISL_980344, EPI_ISL_980345, EPI_ISL_980346, EPI_ISL_980347, EPI_ISL_980348, EPI_ISL_980349, EPI_ISL_980350, EPI_ISL_980351, EPI_ISL_980352, EPI_ISL_980354, EPI_ISL_980355, EPI_ISL_980356, EPI_ISL_980357, EPI_ISL_980358, EPI_ISL_980359, EPI_ISL_980361, EPI_ISL_980363, EPI_ISL_980364, EPI_ISL_980365, EPI_ISL_980366, EPI_ISL_980367, EPI_ISL_980369, EPI_ISL_980371, EPI_ISL_980372, EPI_ISL_980373, EPI_ISL_980382, EPI_ISL_980385, EPI_ISL_980386, EPI_ISL_980387, EPI_ISL_980388, EPI_ISL_980389, EPI_ISL_980391, EPI_ISL_980392, EPI_ISL_980393, EPI_ISL_980394, EPI_ISL_980395, EPI_ISL_980396, EPI_ISL_980399, EPI_ISL_980400, EPI_ISL_980401, EPI_ISL_980402, EPI_ISL_980403, EPI_ISL_980404, EPI_ISL_980408, EPI_ISL_980411, EPI_ISL_980413, EPI_ISL_980414, EPI_ISL_980415, EPI_ISL_980416, EPI_ISL_980418, EPI_ISL_980419, EPI_ISL_980420, EPI_ISL_980422, EPI_ISL_980423, EPI_ISL_980424, EPI_ISL_980425, EPI_ISL_980429, EPI_ISL_980431, EPI_ISL_980432, EPI_ISL_980434, EPI_ISL_980436, EPI_ISL_980437, EPI_ISL_980438, EPI_ISL_980439, EPI_ISL_980441, EPI_ISL_980443, EPI_ISL_980444, EPI_ISL_980445, EPI_ISL_980448, EPI_ISL_980450, EPI_ISL_980451, EPI_ISL_980452, EPI_ISL_980453, EPI_ISL_980454, EPI_ISL_980455, EPI_ISL_980456, EPI_ISL_980457, EPI_ISL_980458, EPI_ISL_980459, EPI_ISL_980460, EPI_ISL_980461, EPI_ISL_980462, EPI_ISL_980466, EPI_ISL_980467, EPI_ISL_980468, EPI_ISL_980470, EPI_ISL_980471, EPI_ISL_980472, EPI_ISL_980477, EPI_ISL_980479, EPI_ISL_980480, EPI_ISL_980483, EPI_ISL_980485, EPI_ISL_980486, EPI_ISL_980487, EPI_ISL_980488, EPI_ISL_980489, EPI_ISL_980492, EPI_ISL_980493, EPI_ISL_980494, EPI_ISL_980495, EPI_ISL_980498, EPI_ISL_980499, EPI_ISL_980501, EPI_ISL_980502, EPI_ISL_980504, EPI_ISL_980505, EPI_ISL_980506, EPI_ISL_980507, EPI_ISL_980508, EPI_ISL_980509, EPI_ISL_980511, EPI_ISL_980513, EPI_ISL_980515, EPI_ISL_980516, EPI_ISL_980517, EPI_ISL_980521, EPI_ISL_980523, EPI_ISL_980524, EPI_ISL_980527, EPI_ISL_980528, EPI_ISL_980529, EPI_ISL_980530, EPI_ISL_980531, EPI_ISL_980533, EPI_ISL_980534, EPI_ISL_980537, EPI_ISL_980538, EPI_ISL_980539 |                                                                                                                                                   |                                                                                                 |                                                                                                                                                                                                                                                                                                             |
| see above                                                                                                                                                                                                                                                                                                                                                                                                                                                                                                                                                                                                                                                                                                                                                                                                                                                                                                                                                                                                                                                                                                                                                                                                                                                                                                                                                                                                                                                                                                                                                                                                                                                                                                                                                                                                                                                                                                                                                                                                                                                                                                                                                                                                                                                                                                                                                                                                                                                                                                                                                                                                                                                                                                                                                                                                                                                                                                                                                                                                                                                                                                                                                                                                                                                                                                                                                                      | Lighthouse Lab in Cambridge                                                                                                                       | Wellcome Sanger Institute for the COVID-19 Genomics UK (COG-UK) Consortium                      | Rob Howes, The Lighthouse Lab in Cambridge and Alex Alderton, Roberto Amato, Sonia Goncalves, Ewan Harrison, David K. Jackson, Ian Johnston, Dominic Kwiatkowski, Cordelia Langford, John Sillitoe on behalf of the Wellcome Sanger Institute COVID-19 Surveillance Team                                    |





[illegible]







[illegible]

[illegible]



|                                                                                                                                                                                                                                                                                                                                                                                                                                                                                                                                                                                                                                                                                                                                                                                                                                                                                                                                                                                                                                                                                                                                                                                                |                                                                                                                                                                                                                     |                                                                           |                                                                                                                                                                                                                                                                                                                                                                                                                                                           |
|------------------------------------------------------------------------------------------------------------------------------------------------------------------------------------------------------------------------------------------------------------------------------------------------------------------------------------------------------------------------------------------------------------------------------------------------------------------------------------------------------------------------------------------------------------------------------------------------------------------------------------------------------------------------------------------------------------------------------------------------------------------------------------------------------------------------------------------------------------------------------------------------------------------------------------------------------------------------------------------------------------------------------------------------------------------------------------------------------------------------------------------------------------------------------------------------|---------------------------------------------------------------------------------------------------------------------------------------------------------------------------------------------------------------------|---------------------------------------------------------------------------|-----------------------------------------------------------------------------------------------------------------------------------------------------------------------------------------------------------------------------------------------------------------------------------------------------------------------------------------------------------------------------------------------------------------------------------------------------------|
| EPI_ISL_995496, EPI_ISL_995497, EPI_ISL_995501, EPI_ISL_995502, EPI_ISL_995505, EPI_ISL_995506, EPI_ISL_995509, EPI_ISL_995512, EPI_ISL_995515, EPI_ISL_995516, EPI_ISL_995521, EPI_ISL_995527, EPI_ISL_995529, EPI_ISL_995531, EPI_ISL_995532, EPI_ISL_995533, EPI_ISL_995535                                                                                                                                                                                                                                                                                                                                                                                                                                                                                                                                                                                                                                                                                                                                                                                                                                                                                                                 |                                                                                                                                                                                                                     |                                                                           |                                                                                                                                                                                                                                                                                                                                                                                                                                                           |
| see above                                                                                                                                                                                                                                                                                                                                                                                                                                                                                                                                                                                                                                                                                                                                                                                                                                                                                                                                                                                                                                                                                                                                                                                      | Jessa                                                                                                                                                                                                               | Jessa                                                                     | Jessa_cmdLab                                                                                                                                                                                                                                                                                                                                                                                                                                              |
| EPI_ISL_995569, EPI_ISL_995571, EPI_ISL_995572, EPI_ISL_995573, EPI_ISL_995574, EPI_ISL_995575, EPI_ISL_995576, EPI_ISL_995577, EPI_ISL_995579, EPI_ISL_995580, EPI_ISL_995581, EPI_ISL_995582, EPI_ISL_995583, EPI_ISL_995584, EPI_ISL_995585, EPI_ISL_995587, EPI_ISL_995588, EPI_ISL_995589, EPI_ISL_995590, EPI_ISL_995591, EPI_ISL_995594, EPI_ISL_995595, EPI_ISL_995596, EPI_ISL_995597, EPI_ISL_995599, EPI_ISL_995600, EPI_ISL_995604, EPI_ISL_995605, EPI_ISL_995607, EPI_ISL_995609, EPI_ISL_995610, EPI_ISL_995611, EPI_ISL_995612, EPI_ISL_995613, EPI_ISL_995623, EPI_ISL_995624, EPI_ISL_995626, EPI_ISL_995627, EPI_ISL_995628, EPI_ISL_995629, EPI_ISL_995630, EPI_ISL_995631, EPI_ISL_995632, EPI_ISL_995636, EPI_ISL_995638, EPI_ISL_995639, EPI_ISL_995640, EPI_ISL_995641, EPI_ISL_995642, EPI_ISL_995643, EPI_ISL_995644, EPI_ISL_995646, EPI_ISL_995647, EPI_ISL_995649, EPI_ISL_995682                                                                                                                                                                                                                                                                                 |                                                                                                                                                                                                                     |                                                                           |                                                                                                                                                                                                                                                                                                                                                                                                                                                           |
| see above                                                                                                                                                                                                                                                                                                                                                                                                                                                                                                                                                                                                                                                                                                                                                                                                                                                                                                                                                                                                                                                                                                                                                                                      | KU Leuven, Rega Institute, Clinical and Epidemiological Virology                                                                                                                                                    | KU Leuven, Rega Institute, Clinical and Epidemiological Virology          | Tony Wawina-Bokalanga, Bert Vanmechelen, Joan Marti-Carerras, Piet Maes                                                                                                                                                                                                                                                                                                                                                                                   |
| EPI_ISL_996413, EPI_ISL_996414                                                                                                                                                                                                                                                                                                                                                                                                                                                                                                                                                                                                                                                                                                                                                                                                                                                                                                                                                                                                                                                                                                                                                                 | University of Birmingham                                                                                                                                                                                            | COVID-19 Genomics UK (COG-UK) Consortium                                  | Institute of Microbiology, University of Birmingham: Claire McMurray, Joanne Stockton, Samuel Nicholls, Radoslaw Poplawski, Will Rowe, Josh Quick, Nicholas Loman. University of Birmingham Testing Laboratory: Celina M Whalley, Andrew Bosworth, Charlotte Poxon, Kasun Wanigasooriya, Oliver Pickles, Mike Kidd, Alex Richter, Andrew D Beggs PHE Heartlands Lab: Husam Osman, Andrew Bosworth. Queen Elizabeth Hospital: Anna Casey                   |
| EPI_ISL_996415                                                                                                                                                                                                                                                                                                                                                                                                                                                                                                                                                                                                                                                                                                                                                                                                                                                                                                                                                                                                                                                                                                                                                                                 | Bundeswehrkrankenhaus Berlin                                                                                                                                                                                        | Bundeswehr Institute of Microbiology                                      | Markus Antwerpen, Alexandra Rehn, Mathias Walter, Malena Bestehorn-Willmann, Mike Pillukat, Sabine Zange, Enrico Georgi, Roman Wölfe                                                                                                                                                                                                                                                                                                                      |
| EPI_ISL_996421, EPI_ISL_996439, EPI_ISL_996475, EPI_ISL_996477, EPI_ISL_996478                                                                                                                                                                                                                                                                                                                                                                                                                                                                                                                                                                                                                                                                                                                                                                                                                                                                                                                                                                                                                                                                                                                 | University of Birmingham                                                                                                                                                                                            | COVID-19 Genomics UK (COG-UK) Consortium                                  | Institute of Microbiology, University of Birmingham: Claire McMurray, Joanne Stockton, Samuel Nicholls, Radoslaw Poplawski, Will Rowe, Josh Quick, Nicholas Loman. University of Birmingham Testing Laboratory: Celina M Whalley, Andrew Bosworth, Charlotte Poxon, Kasun Wanigasooriya, Oliver Pickles, Mike Kidd, Alex Richter, Andrew D Beggs PHE Heartlands Lab: Husam Osman, Andrew Bosworth. Queen Elizabeth Hospital: Anna Casey                   |
| EPI_ISL_996639, EPI_ISL_996640, EPI_ISL_996641, EPI_ISL_996642, EPI_ISL_996643, EPI_ISL_996647, EPI_ISL_996648, EPI_ISL_996649, EPI_ISL_996650, EPI_ISL_996655, EPI_ISL_996656, EPI_ISL_996658, EPI_ISL_996660, EPI_ISL_996661, EPI_ISL_996662, EPI_ISL_996663, EPI_ISL_996664, EPI_ISL_996666, EPI_ISL_996667, EPI_ISL_996745, EPI_ISL_996748, EPI_ISL_996749, EPI_ISL_996751, EPI_ISL_996754, EPI_ISL_996756, EPI_ISL_996758, EPI_ISL_996760, EPI_ISL_996762, EPI_ISL_996763, EPI_ISL_996765, EPI_ISL_996766, EPI_ISL_996769, EPI_ISL_996771, EPI_ISL_996773, EPI_ISL_996774, EPI_ISL_996775, EPI_ISL_996776, EPI_ISL_996779, EPI_ISL_996780, EPI_ISL_996783, EPI_ISL_996784, EPI_ISL_996785, EPI_ISL_996789, EPI_ISL_996790, EPI_ISL_996793, EPI_ISL_996794, EPI_ISL_996795, EPI_ISL_996797, EPI_ISL_996798, EPI_ISL_996801, EPI_ISL_996802, EPI_ISL_996804, EPI_ISL_996808, EPI_ISL_996809, EPI_ISL_996813, EPI_ISL_996815, EPI_ISL_996816, EPI_ISL_996817, EPI_ISL_996818, EPI_ISL_996820, EPI_ISL_996822, EPI_ISL_996823, EPI_ISL_996825, EPI_ISL_996826, EPI_ISL_996828, EPI_ISL_996833, EPI_ISL_996837, EPI_ISL_996839, EPI_ISL_996840, EPI_ISL_996843, EPI_ISL_996844, EPI_ISL_996845 |                                                                                                                                                                                                                     |                                                                           |                                                                                                                                                                                                                                                                                                                                                                                                                                                           |
| see above                                                                                                                                                                                                                                                                                                                                                                                                                                                                                                                                                                                                                                                                                                                                                                                                                                                                                                                                                                                                                                                                                                                                                                                      | Department of Pathology, University of Cambridge                                                                                                                                                                    | COVID-19 Genomics UK (COG-UK) Consortium                                  | Aminu S. Jahun, Yasmin Chaudhry, Iliana Georgana, Myra Hosmillo, Rhys Izuagbe, William L. Hamilton, Martin D. Curran, Surendra Parmar, Ian Goodfellow                                                                                                                                                                                                                                                                                                     |
| EPI_ISL_997064, EPI_ISL_997065, EPI_ISL_997071                                                                                                                                                                                                                                                                                                                                                                                                                                                                                                                                                                                                                                                                                                                                                                                                                                                                                                                                                                                                                                                                                                                                                 | West of Scotland Specialist Virology Centre, NHSGGC / MRC-University of Glasgow Centre for Virus Research                                                                                                           | COVID-19 Genomics UK (COG-UK) Consortium                                  | Ana da Silva Filipe, Natasha Johnson, Kathy Smollett, Daniel Mair, Stephen Carmichael, Alice Broos, Lily Tong, Jenna Nichols, Kyriaki Nomikou; Sarah McDonald; Richard Orton, Joseph Hughes, Sreenu Vattipally, David L Robertson; Alasdair MacLean, Rory Gunson; Sharif Shaaban, Matthew Holden; Rachel Blacow, Guy Mollett, Kathy Li, James Shepherd, Antonia Ho, Emma Thomson                                                                          |
| EPI_ISL_997372                                                                                                                                                                                                                                                                                                                                                                                                                                                                                                                                                                                                                                                                                                                                                                                                                                                                                                                                                                                                                                                                                                                                                                                 | University Hospitals Of Leicester NHS Trust and DeepSeq Nottingham                                                                                                                                                  | COVID-19 Genomics UK (COG-UK) Consortium                                  | Christopher Holmes, Paul Bird, Thomas Helmer, Karlie Fallon, Julian Tang, Jonathan Ball, Patrick McClure, Joseph Chappell, Nadine Holmes, Matthew Carlisle, Christopher Moore, Fei Sang, Johnny Debebe, Victoria Wright, Matthew Loose                                                                                                                                                                                                                    |
| EPI_ISL_998122                                                                                                                                                                                                                                                                                                                                                                                                                                                                                                                                                                                                                                                                                                                                                                                                                                                                                                                                                                                                                                                                                                                                                                                 | Virology Department, Sheffield Teaching Hospitals NHS Foundation Trust/Department of Infection, Immunity and Cardiovascular Disease, The Medical School, University of Sheffield                                    | COVID-19 Genomics UK (COG-UK) Consortium                                  | Thushan de Silva, Matthew Parker, Nikki Smith, Adri Agyal, Rebecca Brown, Luke Green, Rachel Tucker, Paul Parsons, Danielle Groves, Katie Johnson, Laura Carrilero, Alex Keeley, Dave Partridge, Matthew Wyles, Benjamin Lindsey, Mehmet Yavuz, Mohammad Raza, Cariad Evans                                                                                                                                                                               |
| EPI_ISL_998529, EPI_ISL_998578, EPI_ISL_998581, EPI_ISL_998586                                                                                                                                                                                                                                                                                                                                                                                                                                                                                                                                                                                                                                                                                                                                                                                                                                                                                                                                                                                                                                                                                                                                 | Northumbria University / South Tees Hospitals NHS Foundation Trust / North Cumbria Integrated Care NHS Foundation Trust / North Tees and Hartlepool NHS Foundation Trust / Newcastle Hospitals NHS Foundation Trust | COVID-19 Genomics UK (COG-UK) Consortium                                  | Darren L Smith, Andrew Nelson, Matthew Bashton, Greg R Young, Joshua Loh, John Allan, Mohammad A Tariq, Giles S Holt, Gary Black, Wen C Yew, Lynn Dover, Paul Baker, Steve Liggett, Sarah Essex, Jane Greenaway, Debra Padgett, Clive Graham, Garren Scott, Edward Barton, Emma Swindells, Brendan Payne, Jennifer Collins, Yusri Taha, Gary Eltringham                                                                                                   |
| EPI_ISL_998775, EPI_ISL_998787, EPI_ISL_998792, EPI_ISL_998873, EPI_ISL_998877                                                                                                                                                                                                                                                                                                                                                                                                                                                                                                                                                                                                                                                                                                                                                                                                                                                                                                                                                                                                                                                                                                                 | Quadram Institute Bioscience                                                                                                                                                                                        | COVID-19 Genomics UK (COG-UK) Consortium                                  | Dave J. Baker, Gemma L. Kay, Alp Aydin, Thanh Le-Viet, Steven Rudder, Ana P. Tedim, Anastasia Kolyva, Maria Diaz, Leonardo de Oliveira Martins, Nabil-Fareed Alikhan, Lizzie Meadows, Rachael Stanley, Ngozi Elumogo, Muhammed Yasir, Nicholas M. Thomson, Alexander J Trotter, Rachel Gilroy, Samuel Bloomfield, Claire Stuart, Andrew Bell, Reenesh Prakash, Samir Dervisevic, Alison E. Mather, John Wain, Mark Webber, Andrew J. Page, Justin O'Grady |
| EPI_ISL_998912                                                                                                                                                                                                                                                                                                                                                                                                                                                                                                                                                                                                                                                                                                                                                                                                                                                                                                                                                                                                                                                                                                                                                                                 | Queens Medical Centre, Clinical Microbiology Department / DeepSeq Nottingham                                                                                                                                        | COVID-19 Genomics UK (COG-UK) Consortium                                  | Gemma Clark, Wendy Smith, Manjinder Khakh, Vicki M Fleming, Michelle M Lister, Hannah Howson-Wells, Jonathan Ball, Patrick McClure, Joseph Chappell, Theocharis Tsoleridis, Nadine Holmes, Matthew Carlisle, Christopher Moore, Fei Sang, Johnny Debebe, Victoria Wright, Matthew Loose                                                                                                                                                                   |
| EPI_ISL_999523, EPI_ISL_999528, EPI_ISL_999531, EPI_ISL_999532, EPI_ISL_999538, EPI_ISL_999541, EPI_ISL_999543, EPI_ISL_999549, EPI_ISL_999554, EPI_ISL_999556, EPI_ISL_999563, EPI_ISL_999571, EPI_ISL_999572, EPI_ISL_999574, EPI_ISL_999577, EPI_ISL_999578, EPI_ISL_999586, EPI_ISL_999595, EPI_ISL_999598, EPI_ISL_999601, EPI_ISL_999603, EPI_ISL_999606, EPI_ISL_999607, EPI_ISL_999612, EPI_ISL_999613, EPI_ISL_999614, EPI_ISL_999615, EPI_ISL_999616, EPI_ISL_999620, EPI_ISL_999627, EPI_ISL_999628, EPI_ISL_999773, EPI_ISL_999789, EPI_ISL_999792, EPI_ISL_999793, EPI_ISL_999795, EPI_ISL_999796, EPI_ISL_999803, EPI_ISL_999833, EPI_ISL_999858, EPI_ISL_999881, EPI_ISL_999894, EPI_ISL_999905, EPI_ISL_999906, EPI_ISL_999907, EPI_ISL_999916, EPI_ISL_999921, EPI_ISL_999924, EPI_ISL_999929, EPI_ISL_999935, EPI_ISL_999943                                                                                                                                                                                                                                                                                                                                                 |                                                                                                                                                                                                                     |                                                                           |                                                                                                                                                                                                                                                                                                                                                                                                                                                           |
| see above                                                                                                                                                                                                                                                                                                                                                                                                                                                                                                                                                                                                                                                                                                                                                                                                                                                                                                                                                                                                                                                                                                                                                                                      | Originating lab: Wales Specialist Virology Centre Sequencing lab: Pathogen Genomics Unit                                                                                                                            | Public Health Wales Microbiology Cardiff Wales Specialist Virology Centre | Catherine Moore, Johnathan Evans, Laura Gifford, Malorie Perry, Simon Cottrell, Angela Marchbank, Alec Birchley, Alexander Adams, Amy Gaskin, Bree Gatica-Wilcox, Jason Coombes, Joel Southgate, Lauren Gilbert, Lee Graham, Nicole Pacchiarini, Sara Kumziene-Summerhayes, Sarah Taylor, Sophie Jones, Sara Rey, Matthew Bull, Joanne Watkins, Sally Corden, Tom Connor                                                                                  |
| EPI_ISL_999947, EPI_ISL_999948, EPI_ISL_999958, EPI_ISL_999959, EPI_ISL_999988, EPI_ISL_999989                                                                                                                                                                                                                                                                                                                                                                                                                                                                                                                                                                                                                                                                                                                                                                                                                                                                                                                                                                                                                                                                                                 | Wales Specialist Virology Centre Sequencing lab: Pathogen Genomics Unit                                                                                                                                             | Public Health Wales Microbiology Cardiff Wales Specialist Virology Centre | Catherine Moore, Johnathan Evans, Laura Gifford, Malorie Perry, Simon Cottrell, Angela Marchbank, Alec Birchley, Alexander Adams, Amy Gaskin, Bree Gatica-Wilcox, Jason Coombes, Joel Southgate, Lauren Gilbert, Lee Graham, Nicole Pacchiarini, Sara Kumziene-Summerhayes, Sarah Taylor, Sophie Jones, Sara Rey, Matthew Bull, Joanne Watkins, Sally Corden, Tom Connor                                                                                  |

We gratefully acknowledge the following Authors from the Originating laboratories responsible for obtaining the specimens, as well as the Submitting laboratories where the genome data were generated and shared via GISAID, on which this research is based.

All Submitters of data may be contacted directly via [www.gisaid.org](http://www.gisaid.org)

Authors are sorted alphabetically.

| Accession ID                                                                                                                                                                                                                                 | Originating Laboratory                                                                                                                                                           | Submitting Laboratory                                                                    | Authors                                                                                                                                                                                                                                                                     |
|----------------------------------------------------------------------------------------------------------------------------------------------------------------------------------------------------------------------------------------------|----------------------------------------------------------------------------------------------------------------------------------------------------------------------------------|------------------------------------------------------------------------------------------|-----------------------------------------------------------------------------------------------------------------------------------------------------------------------------------------------------------------------------------------------------------------------------|
| EPI_ISL_1000052                                                                                                                                                                                                                              | Plateforme BIS Namur                                                                                                                                                             | GiGA Medical Genomics                                                                    | Keith Durkin, Maria Artesi, Sébastien Bontems, Raphaël Boreux, Bouchra Boujemla, Cécile Meex, Pierrette Melin, Marie-Pierre Hayette, Vincent Bours                                                                                                                          |
| EPI_ISL_1000247, EPI_ISL_1000281, EPI_ISL_1000288, EPI_ISL_1000305, EPI_ISL_1000542, EPI_ISL_1000600, EPI_ISL_1000607, EPI_ISL_1000608, EPI_ISL_1000610, EPI_ISL_1000612, EPI_ISL_1000614, EPI_ISL_1000622, EPI_ISL_1000623, EPI_ISL_1000624 | Centre for Enzyme Innovation, University of Portsmouth / Translational Research Laboratory, Portsmouth Hospitals NHS Trust                                                       | COVID-19 Genomics UK (COG-UK) Consortium                                                 | Angela Beckett,Salman Goudarzi,Christopher Fearn,Kate Cook,Katie Loveson,Sharon Glaysher,Scott Elliott,Samuel Robson                                                                                                                                                        |
| see above                                                                                                                                                                                                                                    |                                                                                                                                                                                  |                                                                                          |                                                                                                                                                                                                                                                                             |
| EPI_ISL_1000636, EPI_ISL_1000640                                                                                                                                                                                                             | Department of Pathology, University of Cambridge                                                                                                                                 | COVID-19 Genomics UK (COG-UK) Consortium                                                 | Aminu S. Jahun, Yasmin Chaudhry, Iliana Georgana, Myra Hosmillo, Rhys Izuagbe, William L. Hamilton, Martin D. Curran, Surendra Parmar, Ian Goodfellow                                                                                                                       |
| EPI_ISL_1000653, EPI_ISL_1000687, EPI_ISL_1000738                                                                                                                                                                                            | Virology Department, Sheffield Teaching Hospitals NHS Foundation Trust/Department of Infection, Immunity and Cardiovascular Disease, The Medical School, University of Sheffield | COVID-19 Genomics UK (COG-UK) Consortium                                                 | Thushan de Silva, Matthew Parker, Nikki Smith, Adri Agyal, Rebecca Brown, Luke Green, Rachel Tucker, Paul Parsons, Danielle Groves, Katie Johnson, Laura Carrilero, Alex Keeley, Dave Partridge, Matthew Wyles, Benjamin Lindsey, Mehmet Yavuz, Mohammad Raza, Cariad Evans |
| EPI_ISL_1000832, EPI_ISL_1000891, EPI_ISL_1000897, EPI_ISL_1000912, EPI_ISL_1000913, EPI_ISL_1000945, EPI_ISL_1000956, EPI_ISL_1000961, EPI_ISL_1000962, EPI_ISL_1000966                                                                     | Bioinformatics and Biostatistics Lab, Advanced Sequencing Facility                                                                                                               | COVID-19 Genomics UK (COG-UK) Consortium                                                 | Aengus Stewart,Jerome Nicod,Chelsea Sawyer,Laura Cubitt,Harshil Patel,Margaret Crawford                                                                                                                                                                                     |
| EPI_ISL_1000968                                                                                                                                                                                                                              | Cerballiance Provence                                                                                                                                                            | Cerba                                                                                    | Roig JC, Haim-Boukobza S, Meyer S, Trombert-Paolantoni S, Lecorche E, Roquebert B                                                                                                                                                                                           |
| EPI_ISL_1001173, EPI_ISL_1001174, EPI_ISL_1001176, EPI_ISL_1001177, EPI_ISL_1001178, EPI_ISL_1001179, EPI_ISL_1001180, EPI_ISL_1001182, EPI_ISL_1001260                                                                                      | National Virus Reference Laboratory                                                                                                                                              | National Virus Reference Laboratory                                                      | Michael Carr, Gabriel Gonzalez, Zoe Yandle, Jonathan Dean, Cillian F De Gascun                                                                                                                                                                                              |
| EPI_ISL_1001301                                                                                                                                                                                                                              | Hopital                                                                                                                                                                          | National Reference Center for Viruses of Respiratory Infections, Institut Pasteur, Paris | Marion Barbet, Sylvie Behillil, Méline Bizard, Angela Brisebarre, Camille Capel, Etienne Simon-Lorière, Vincent Enouf, Maud Vanpeene, Sylvie van der Werf,Lagathu GisèLe                                                                                                    |
| EPI_ISL_1001302                                                                                                                                                                                                                              | Hopital                                                                                                                                                                          | National Reference Center for Viruses of Respiratory Infections, Institut Pasteur, Paris | Marion Barbet, Sylvie Behillil, Méline Bizard, Angela Brisebarre, Camille Capel, Etienne Simon-Lorière, Vincent Enouf, Maud Vanpeene, Sylvie van der Werf,Guinard Jérôme                                                                                                    |
| EPI_ISL_1001303, EPI_ISL_1001305, EPI_ISL_1001306, EPI_ISL_1001307                                                                                                                                                                           | Hopital                                                                                                                                                                          | National Reference Center for Viruses of Respiratory Infections, Institut Pasteur, Paris | Marion Barbet, Sylvie Behillil, Méline Bizard, Angela Brisebarre, Camille Capel, Etienne Simon-Lorière, Vincent Enouf, Maud Vanpeene, Sylvie van der Werf,Fourgeaud Jacques                                                                                                 |
| EPI_ISL_1001309                                                                                                                                                                                                                              | Hopital                                                                                                                                                                          | National Reference Center for Viruses of Respiratory Infections, Institut Pasteur, Paris | Marion Barbet, Sylvie Behillil, Méline Bizard, Angela Brisebarre, Camille Capel, Etienne Simon-Lorière, Vincent Enouf, Maud Vanpeene, Sylvie van der Werf,Laplanche Sophie                                                                                                  |
| EPI_ISL_1001310                                                                                                                                                                                                                              | Labo Analyses Med                                                                                                                                                                | National Reference Center for Viruses of Respiratory Infections, Institut Pasteur, Paris | Marion Barbet, Sylvie Behillil, Méline Bizard, Angela Brisebarre, Camille Capel, Etienne Simon-Lorière, Vincent Enouf, Maud Vanpeene, Sylvie van der Werf,Cady Anne                                                                                                         |
| EPI_ISL_1001311                                                                                                                                                                                                                              | hopital                                                                                                                                                                          | National Reference Center for Viruses of Respiratory Infections, Institut Pasteur, Paris | Marion Barbet, Sylvie Behillil, Méline Bizard, Angela Brisebarre, Camille Capel, Etienne Simon-Lorière, Vincent Enouf, Maud Vanpeene, Sylvie van der Werf,Stoessel-Thouvenin Patricia                                                                                       |
| EPI_ISL_1001314, EPI_ISL_1001315, EPI_ISL_1001317                                                                                                                                                                                            | Hopital                                                                                                                                                                          | National Reference Center for Viruses of Respiratory Infections, Institut Pasteur, Paris | Marion Barbet, Sylvie Behillil, Méline Bizard, Angela Brisebarre, Camille Capel, Etienne Simon-Lorière, Vincent Enouf, Maud Vanpeene, Sylvie van der Werf,Martres Pascale                                                                                                   |
| EPI_ISL_1001318                                                                                                                                                                                                                              | Labo Analyses Med                                                                                                                                                                | National Reference Center for Viruses of Respiratory Infections, Institut Pasteur, Paris | Marion Barbet, Sylvie Behillil, Méline Bizard, Angela Brisebarre, Camille Capel, Etienne Simon-Lorière, Vincent Enouf, Maud Vanpeene, Sylvie van der Werf,Cady Anne                                                                                                         |
| EPI_ISL_1001319, EPI_ISL_1001320                                                                                                                                                                                                             | Hopital                                                                                                                                                                          | National Reference Center for Viruses of Respiratory Infections, Institut Pasteur, Paris | Marion Barbet, Sylvie Behillil, Méline Bizard, Angela Brisebarre, Camille Capel, Etienne Simon-Lorière, Vincent Enouf, Maud Vanpeene, Sylvie van der Werf,Bressollette (C) CéLine                                                                                           |
| EPI_ISL_1001321, EPI_ISL_1001322, EPI_ISL_1001323, EPI_ISL_1001324                                                                                                                                                                           | Hopital                                                                                                                                                                          | National Reference Center for Viruses of Respiratory Infections, Institut Pasteur, Paris | Marion Barbet, Sylvie Behillil, Méline Bizard, Angela Brisebarre, Camille Capel, Etienne Simon-Lorière, Vincent Enouf, Maud Vanpeene, Sylvie van der Werf,Lagathu GisèLe                                                                                                    |
| EPI_ISL_1001325                                                                                                                                                                                                                              | Hopital                                                                                                                                                                          | National Reference Center for Viruses of Respiratory Infections, Institut Pasteur, Paris | Marion Barbet, Sylvie Behillil, Méline Bizard, Angela Brisebarre, Camille Capel, Etienne Simon-Lorière, Vincent Enouf, Maud Vanpeene, Sylvie van der Werf,Fourgeaud Jacques                                                                                                 |
| EPI_ISL_1001327                                                                                                                                                                                                                              | hopital                                                                                                                                                                          | National Reference Center for Viruses of Respiratory Infections, Institut Pasteur, Paris | Marion Barbet, Sylvie Behillil, Méline Bizard, Angela Brisebarre, Camille Capel, Etienne Simon-Lorière, Vincent Enouf, Maud Vanpeene, Sylvie van der Werf,Stoessel-Thouvenin Patricia                                                                                       |
| EPI_ISL_1001328                                                                                                                                                                                                                              | Hopital                                                                                                                                                                          | National Reference Center for Viruses of Respiratory Infections, Institut Pasteur, Paris | Marion Barbet, Sylvie Behillil, Méline Bizard, Angela Brisebarre, Camille Capel, Etienne Simon-Lorière, Vincent Enouf, Maud Vanpeene, Sylvie van der Werf,Martres Pascale                                                                                                   |
| EPI_ISL_1001329                                                                                                                                                                                                                              | Labo Analyses Med                                                                                                                                                                | National Reference Center for Viruses of Respiratory Infections, Institut Pasteur, Paris | Marion Barbet, Sylvie Behillil, Méline Bizard, Angela Brisebarre, Camille Capel, Etienne Simon-Lorière, Vincent Enouf, Maud Vanpeene, Sylvie van der Werf,Dynalab                                                                                                           |
| EPI_ISL_1001330                                                                                                                                                                                                                              | Hopital                                                                                                                                                                          | National Reference Center for Viruses of Respiratory Infections, Institut Pasteur, Paris | Marion Barbet, Sylvie Behillil, Méline Bizard, Angela Brisebarre, Camille Capel, Etienne Simon-Lorière, Vincent Enouf, Maud Vanpeene, Sylvie van der Werf,Bressollette (C) CéLine                                                                                           |
| EPI_ISL_1001331, EPI_ISL_1001332                                                                                                                                                                                                             | hopital                                                                                                                                                                          | National Reference Center for Viruses of Respiratory Infections, Institut Pasteur, Paris | Marion Barbet, Sylvie Behillil, Méline Bizard, Angela Brisebarre, Camille Capel, Etienne Simon-Lorière, Vincent Enouf, Maud Vanpeene, Sylvie van der Werf,Stoessel-Thouvenin Patricia                                                                                       |
| EPI_ISL_1001334, EPI_ISL_1001335                                                                                                                                                                                                             | hopital                                                                                                                                                                          | National Reference Center for Viruses of Respiratory Infections, Institut Pasteur, Paris | Marion Barbet, Sylvie Behillil, Méline Bizard, Angela Brisebarre, Camille Capel, Etienne Simon-Lorière, Vincent Enouf, Maud Vanpeene, Sylvie van der Werf,Guigon AuréLie                                                                                                    |
| EPI_ISL_1001336, EPI_ISL_1001337                                                                                                                                                                                                             | Hopital                                                                                                                                                                          | National Reference Center for Viruses of Respiratory Infections, Institut Pasteur, Paris | Marion Barbet, Sylvie Behillil, Méline Bizard, Angela Brisebarre, Camille Capel, Etienne Simon-Lorière, Vincent Enouf, Maud Vanpeene, Sylvie van der Werf,Laplanche Sophie                                                                                                  |
| EPI_ISL_1001338, EPI_ISL_1001339                                                                                                                                                                                                             | hopital                                                                                                                                                                          | National Reference Center for Viruses of Respiratory Infections, Institut Pasteur, Paris | Marion Barbet, Sylvie Behillil, Méline Bizard, Angela Brisebarre, Camille Capel, Etienne Simon-Lorière, Vincent Enouf, Maud Vanpeene, Sylvie van der Werf,Stoessel-Thouvenin Patricia                                                                                       |
| EPI_ISL_1001340, EPI_ISL_1001341, EPI_ISL_1001342, EPI_ISL_1001343                                                                                                                                                                           | hopital                                                                                                                                                                          | National Reference Center for Viruses of Respiratory Infections, Institut Pasteur, Paris | Marion Barbet, Sylvie Behillil, Méline Bizard, Angela Brisebarre, Camille Capel, Etienne Simon-Lorière, Vincent Enouf, Maud Vanpeene, Sylvie van der Werf,Guigon AuréLie                                                                                                    |

|                                                                                                                                                                                                                                                                                                                                                                                                                                                                                                                                               |                                        |                                                                                          |                                                                                                                                                                                                                                                                                                                                                                                                                                                                          |
|-----------------------------------------------------------------------------------------------------------------------------------------------------------------------------------------------------------------------------------------------------------------------------------------------------------------------------------------------------------------------------------------------------------------------------------------------------------------------------------------------------------------------------------------------|----------------------------------------|------------------------------------------------------------------------------------------|--------------------------------------------------------------------------------------------------------------------------------------------------------------------------------------------------------------------------------------------------------------------------------------------------------------------------------------------------------------------------------------------------------------------------------------------------------------------------|
| EPI_ISL_1001344, EPI_ISL_1001346                                                                                                                                                                                                                                                                                                                                                                                                                                                                                                              | hopital                                | National Reference Center for Viruses of Respiratory Infections, Institut Pasteur, Paris | Marion Barbet, Sylvie Behillil, Méline Bizard, Angela Brisebarre, Camille Capel, Etienne Simon-Lorière, Vincent Enouf, Maud Vanpeene, Sylvie van der Werf,Stoessel-Thouvenin Patricia                                                                                                                                                                                                                                                                                    |
| EPI_ISL_1001348, EPI_ISL_1001349, EPI_ISL_1001350                                                                                                                                                                                                                                                                                                                                                                                                                                                                                             | hopital                                | National Reference Center for Viruses of Respiratory Infections, Institut Pasteur, Paris | Marion Barbet, Sylvie Behillil, Méline Bizard, Angela Brisebarre, Camille Capel, Etienne Simon-Lorière, Vincent Enouf, Maud Vanpeene, Sylvie van der Werf,Guigon AuréLie                                                                                                                                                                                                                                                                                                 |
| EPI_ISL_1001352                                                                                                                                                                                                                                                                                                                                                                                                                                                                                                                               | Hopital                                | National Reference Center for Viruses of Respiratory Infections, Institut Pasteur, Paris | Marion Barbet, Sylvie Behillil, Méline Bizard, Angela Brisebarre, Camille Capel, Etienne Simon-Lorière, Vincent Enouf, Maud Vanpeene, Sylvie van der Werf,Laplanche Sophie                                                                                                                                                                                                                                                                                               |
| EPI_ISL_1001355                                                                                                                                                                                                                                                                                                                                                                                                                                                                                                                               | Hopital                                | National Reference Center for Viruses of Respiratory Infections, Institut Pasteur, Paris | Marion Barbet, Sylvie Behillil, Méline Bizard, Angela Brisebarre, Camille Capel, Etienne Simon-Lorière, Vincent Enouf, Maud Vanpeene, Sylvie van der Werf,Marque Juliet StéPhanie                                                                                                                                                                                                                                                                                        |
| EPI_ISL_1001356                                                                                                                                                                                                                                                                                                                                                                                                                                                                                                                               | Hopital                                | National Reference Center for Viruses of Respiratory Infections, Institut Pasteur, Paris | Marion Barbet, Sylvie Behillil, Méline Bizard, Angela Brisebarre, Camille Capel, Etienne Simon-Lorière, Vincent Enouf, Maud Vanpeene, Sylvie van der Werf,Guinard Jérôme                                                                                                                                                                                                                                                                                                 |
| EPI_ISL_1001357, EPI_ISL_1001360, EPI_ISL_1001361, EPI_ISL_1001363                                                                                                                                                                                                                                                                                                                                                                                                                                                                            | Hopital                                | National Reference Center for Viruses of Respiratory Infections, Institut Pasteur, Paris | Marion Barbet, Sylvie Behillil, Méline Bizard, Angela Brisebarre, Camille Capel, Etienne Simon-Lorière, Vincent Enouf, Maud Vanpeene, Sylvie van der Werf,Fourgeaud Jacques                                                                                                                                                                                                                                                                                              |
| EPI_ISL_1001365, EPI_ISL_1001366                                                                                                                                                                                                                                                                                                                                                                                                                                                                                                              | Hopital                                | National Reference Center for Viruses of Respiratory Infections, Institut Pasteur, Paris | Marion Barbet, Sylvie Behillil, Méline Bizard, Angela Brisebarre, Camille Capel, Etienne Simon-Lorière, Vincent Enouf, Maud Vanpeene, Sylvie van der Werf,Lagathu GisèLe                                                                                                                                                                                                                                                                                                 |
| EPI_ISL_1001367                                                                                                                                                                                                                                                                                                                                                                                                                                                                                                                               | Hopital                                | National Reference Center for Viruses of Respiratory Infections, Institut Pasteur, Paris | Marion Barbet, Sylvie Behillil, Méline Bizard, Angela Brisebarre, Camille Capel, Etienne Simon-Lorière, Vincent Enouf, Maud Vanpeene, Sylvie van der Werf,Laplanche Sophie                                                                                                                                                                                                                                                                                               |
| EPI_ISL_1001368, EPI_ISL_1001369, EPI_ISL_1001370, EPI_ISL_1001371                                                                                                                                                                                                                                                                                                                                                                                                                                                                            | hopital                                | National Reference Center for Viruses of Respiratory Infections, Institut Pasteur, Paris | Marion Barbet, Sylvie Behillil, Méline Bizard, Angela Brisebarre, Camille Capel, Etienne Simon-Lorière, Vincent Enouf, Maud Vanpeene, Sylvie van der Werf,Guigon AuréLie                                                                                                                                                                                                                                                                                                 |
| EPI_ISL_1001373                                                                                                                                                                                                                                                                                                                                                                                                                                                                                                                               | Hopital                                | National Reference Center for Viruses of Respiratory Infections, Institut Pasteur, Paris | Marion Barbet, Sylvie Behillil, Méline Bizard, Angela Brisebarre, Camille Capel, Etienne Simon-Lorière, Vincent Enouf, Maud Vanpeene, Sylvie van der Werf,Laplanche Sophie                                                                                                                                                                                                                                                                                               |
| EPI_ISL_1001374, EPI_ISL_1001375, EPI_ISL_1001381, EPI_ISL_1001382, EPI_ISL_1001383                                                                                                                                                                                                                                                                                                                                                                                                                                                           | hopital                                | National Reference Center for Viruses of Respiratory Infections, Institut Pasteur, Paris | Marion Barbet, Sylvie Behillil, Méline Bizard, Angela Brisebarre, Camille Capel, Etienne Simon-Lorière, Vincent Enouf, Maud Vanpeene, Sylvie van der Werf,Guigon AuréLie                                                                                                                                                                                                                                                                                                 |
| EPI_ISL_1001388                                                                                                                                                                                                                                                                                                                                                                                                                                                                                                                               | Hopital                                | National Reference Center for Viruses of Respiratory Infections, Institut Pasteur, Paris | Marion Barbet, Sylvie Behillil, Méline Bizard, Angela Brisebarre, Camille Capel, Etienne Simon-Lorière, Vincent Enouf, Maud Vanpeene, Sylvie van der Werf,Fourgeaud Jacques                                                                                                                                                                                                                                                                                              |
| EPI_ISL_1001394                                                                                                                                                                                                                                                                                                                                                                                                                                                                                                                               | Labo Analyses Med                      | National Reference Center for Viruses of Respiratory Infections, Institut Pasteur, Paris | Marion Barbet, Sylvie Behillil, Méline Bizard, Angela Brisebarre, Camille Capel, Etienne Simon-Lorière, Vincent Enouf, Maud Vanpeene, Sylvie van der Werf                                                                                                                                                                                                                                                                                                                |
| EPI_ISL_1001395, EPI_ISL_1001396, EPI_ISL_1001397, EPI_ISL_1001398, EPI_ISL_1001399, EPI_ISL_1001400, EPI_ISL_1001401, EPI_ISL_1001402                                                                                                                                                                                                                                                                                                                                                                                                        | Outre mer                              | National Reference Center for Viruses of Respiratory Infections, Institut Pasteur, Paris | Marion Barbet, Sylvie Behillil, Méline Bizard, Angela Brisebarre, Camille Capel, Etienne Simon-Lorière, Vincent Enouf, Maud Vanpeene, Sylvie van der Werf,Rousset (Guy) Dominique                                                                                                                                                                                                                                                                                        |
| EPI_ISL_1001403, EPI_ISL_1001404, EPI_ISL_1001405, EPI_ISL_1001406, EPI_ISL_1001407                                                                                                                                                                                                                                                                                                                                                                                                                                                           | Hopital                                | National Reference Center for Viruses of Respiratory Infections, Institut Pasteur, Paris | Marion Barbet, Sylvie Behillil, Méline Bizard, Angela Brisebarre, Camille Capel, Etienne Simon-Lorière, Vincent Enouf, Maud Vanpeene, Sylvie van der Werf,Guinoiseau Thibault                                                                                                                                                                                                                                                                                            |
| EPI_ISL_1001408, EPI_ISL_1001409, EPI_ISL_1001410, EPI_ISL_1001411, EPI_ISL_1001412, EPI_ISL_1001413, EPI_ISL_1001414                                                                                                                                                                                                                                                                                                                                                                                                                         | Outre mer                              | National Reference Center for Viruses of Respiratory Infections, Institut Pasteur, Paris | Marion Barbet, Sylvie Behillil, Méline Bizard, Angela Brisebarre, Camille Capel, Etienne Simon-Lorière, Vincent Enouf, Maud Vanpeene, Sylvie van der Werf,Rousset (Guy) Dominique                                                                                                                                                                                                                                                                                        |
| EPI_ISL_1001415                                                                                                                                                                                                                                                                                                                                                                                                                                                                                                                               | Hopital                                | National Reference Center for Viruses of Respiratory Infections, Institut Pasteur, Paris | Marion Barbet, Sylvie Behillil, Méline Bizard, Angela Brisebarre, Camille Capel, Etienne Simon-Lorière, Vincent Enouf, Maud Vanpeene, Sylvie van der Werf,Lagathu GisèLe                                                                                                                                                                                                                                                                                                 |
| EPI_ISL_1001416, EPI_ISL_1001417, EPI_ISL_1001418, EPI_ISL_1001419, EPI_ISL_1001420, EPI_ISL_1001422, EPI_ISL_1001423, EPI_ISL_1001424, EPI_ISL_1001425, EPI_ISL_1001426, EPI_ISL_1001427, EPI_ISL_1001428, EPI_ISL_1001429, EPI_ISL_1001430, EPI_ISL_1001431, EPI_ISL_1001432, EPI_ISL_1001433, EPI_ISL_1001434, EPI_ISL_1001435, EPI_ISL_1001437, EPI_ISL_1001438, EPI_ISL_1001440, EPI_ISL_1001441, EPI_ISL_1001442, EPI_ISL_1001443, EPI_ISL_1001444, EPI_ISL_1001445, EPI_ISL_1001446, EPI_ISL_1001447, EPI_ISL_1001448, EPI_ISL_1001449 | see above                              | National Reference Center for Viruses of Respiratory Infections, Institut Pasteur, Paris | Marion Barbet, Sylvie Behillil, Méline Bizard, Angela Brisebarre, Camille Capel, Etienne Simon-Lorière, Vincent Enouf, Maud Vanpeene, Sylvie van der Werf,Rousset (Guy) Dominique                                                                                                                                                                                                                                                                                        |
| EPI_ISL_1001450                                                                                                                                                                                                                                                                                                                                                                                                                                                                                                                               | Hopital                                | National Reference Center for Viruses of Respiratory Infections, Institut Pasteur, Paris | Marion Barbet, Sylvie Behillil, Méline Bizard, Angela Brisebarre, Camille Capel, Etienne Simon-Lorière, Vincent Enouf, Maud Vanpeene, Sylvie van der Werf,Ducancelle Alexandra                                                                                                                                                                                                                                                                                           |
| EPI_ISL_1001452, EPI_ISL_1001453, EPI_ISL_1001454, EPI_ISL_1001455                                                                                                                                                                                                                                                                                                                                                                                                                                                                            | Outre mer                              | National Reference Center for Viruses of Respiratory Infections, Institut Pasteur, Paris | Marion Barbet, Sylvie Behillil, Méline Bizard, Angela Brisebarre, Camille Capel, Etienne Simon-Lorière, Vincent Enouf, Maud Vanpeene, Sylvie van der Werf,Rousset (Guy) Dominique                                                                                                                                                                                                                                                                                        |
| EPI_ISL_1001456                                                                                                                                                                                                                                                                                                                                                                                                                                                                                                                               | Hopital                                | National Reference Center for Viruses of Respiratory Infections, Institut Pasteur, Paris | Marion Barbet, Sylvie Behillil, Méline Bizard, Angela Brisebarre, Camille Capel, Etienne Simon-Lorière, Vincent Enouf, Maud Vanpeene, Sylvie van der Werf,Ducancelle Alexandra                                                                                                                                                                                                                                                                                           |
| EPI_ISL_1001459                                                                                                                                                                                                                                                                                                                                                                                                                                                                                                                               | Laboratoire Cerballiance Port de Bouc  | Cerba                                                                                    | Roig JC, Haim-Boukobza S, Meyer S, Trombert-Paolantoni S, Lecorche E, Roquebert B                                                                                                                                                                                                                                                                                                                                                                                        |
| EPI_ISL_1001461                                                                                                                                                                                                                                                                                                                                                                                                                                                                                                                               | Cerballiance                           | Cerba                                                                                    | Roig JC, Haim-Boukobza S, Meyer S, Trombert-Paolantoni S, Lecorche E, Roquebert B                                                                                                                                                                                                                                                                                                                                                                                        |
| EPI_ISL_1001462                                                                                                                                                                                                                                                                                                                                                                                                                                                                                                                               | Cerballiance Provence                  | Cerba                                                                                    | Roig JC, Haim-Boukobza S, Meyer S, Trombert-Paolantoni S, Lecorche E, Roquebert B                                                                                                                                                                                                                                                                                                                                                                                        |
| EPI_ISL_1001463                                                                                                                                                                                                                                                                                                                                                                                                                                                                                                                               | Cerballiance Port de bouc              | Cerba                                                                                    | Roig JC, Haim-Boukobza S, Meyer S, Trombert-Paolantoni S, Lecorche E, Roquebert B                                                                                                                                                                                                                                                                                                                                                                                        |
| EPI_ISL_1001464                                                                                                                                                                                                                                                                                                                                                                                                                                                                                                                               | Laboratoire Cerballiance du pole santé | Cerba                                                                                    | Roig JC, Haim-Boukobza S, Meyer S, Trombert-Paolantoni S, Lecorche E, Roquebert B                                                                                                                                                                                                                                                                                                                                                                                        |
| EPI_ISL_1001465                                                                                                                                                                                                                                                                                                                                                                                                                                                                                                                               | Cerballiance Carpentras CV             | Cerba                                                                                    | Roig JC, Haim-Boukobza S, Meyer S, Trombert-Paolantoni S, Lecorche E, Roquebert B                                                                                                                                                                                                                                                                                                                                                                                        |
| EPI_ISL_1001466                                                                                                                                                                                                                                                                                                                                                                                                                                                                                                                               | Cerballiance Haifa                     | Cerba                                                                                    | Roig JC, Haim-Boukobza S, Meyer S, Trombert-Paolantoni S, Lecorche E, Roquebert B                                                                                                                                                                                                                                                                                                                                                                                        |
| EPI_ISL_1001467                                                                                                                                                                                                                                                                                                                                                                                                                                                                                                                               | Cerballiance Carpentras CV             | Cerba                                                                                    | Roig JC, Haim-Boukobza S, Meyer S, Trombert-Paolantoni S, Lecorche E, Roquebert B                                                                                                                                                                                                                                                                                                                                                                                        |
| EPI_ISL_1001573                                                                                                                                                                                                                                                                                                                                                                                                                                                                                                                               | Cerballiance Luynes                    | Cerba                                                                                    | Roig JC, Haim-Boukobza S, Meyer S, Trombert-Paolantoni S, Lecorche E, Roquebert B                                                                                                                                                                                                                                                                                                                                                                                        |
| EPI_ISL_1001828                                                                                                                                                                                                                                                                                                                                                                                                                                                                                                                               | Viollier AG                            | Department of Biosystems Science and Engineering, ETH Zürich                             | Chaoran Chen, Sarah Nadeau, Catharine Aquino, Ivan Topolsky, Philipp Jablonski, Lara Fuhrmann, David Dreifuss, Katharina Jahn, Andreia Cabral de Gouvea, Maria Domenica Moccia, Simon Grüter, Timothy Sykes, Lennart Opitz, Griffin White, Laura Neff, Doris Popovic, Andrea Patrignani, Jay Tracy, Ralph Schlapbach, Christiane Beckmann, Maurice Redondo, Olivier Kobel, Christoph Noppen, Sophie Seidel, Noemie Santamaria de Souza, Niko Beerenwinkel, Tanja Stadler |
| EPI_ISL_1001832                                                                                                                                                                                                                                                                                                                                                                                                                                                                                                                               | Viollier AG                            | Department of Biosystems Science and Engineering, ETH Zürich                             | Christian Beisel, Sarah Nadeau, Chaoran Chen, Ivan Topolsky, Philipp Jablonski, Lara Fuhrmann, David Dreifuss, Katharina Jahn, Rebecca Denes, Ina Nissen, Natascha Santacroce, Elodie Burcklen, Christiane Beckmann, Maurice Redondo, Olivier Kobel, Christoph Noppen, Sophie Seidel, Noemie Santamaria de Souza, Niko Beerenwinkel, Tanja Stadler                                                                                                                       |
| EPI_ISL_1001833                                                                                                                                                                                                                                                                                                                                                                                                                                                                                                                               | Viollier AG                            | Department of Biosystems Science and Engineering, ETH Zürich                             | Chaoran Chen, Sarah Nadeau, Catharine Aquino, Ivan Topolsky, Philipp Jablonski, Lara Fuhrmann, David Dreifuss, Katharina Jahn, Andreia Cabral de Gouvea, Maria Domenica Moccia, Simon Grüter, Timothy Sykes, Lennart Opitz, Griffin White, Laura Neff, Doris Popovic, Andrea Patrignani, Jay Tracy, Ralph Schlapbach, Christiane Beckmann, Maurice Redondo, Olivier Kobel, Christoph Noppen, Sophie Seidel, Noemie Santamaria de Souza, Niko Beerenwinkel, Tanja Stadler |



[illegible]





[illegible]

[illegible]

[illegible]

[illegible]

|                                                                                                                                                                                                                                                                                                                                                                                                                                                                                                                                                                                                                                                                                                                                                                                                                                                                                                                                                                                                                                                                                                                                                                                                                                                                                                                                                                                                                                                                                                                                                                                                                                                                                                                                                                                                                                                                                                                                                                                                                                                                                                                                                                                                                                                                                                                                                                                                                                                                                                                                                                                                                                                                                                                                                                                                                                                                                                                                                                                                                                                                                                                                                                                                                                                                                                                                                                                                                                                                                                                                                                                                                                                                                                                                                                                                                                                                                                                                                                                                                                                                                                                                                                                                                                                                                                                                                                                                                                                  |                                                                                                     |                                                                                                                                   |                                                                                                                                                                                                                                                                                                                                                                                                                                                                          |
|--------------------------------------------------------------------------------------------------------------------------------------------------------------------------------------------------------------------------------------------------------------------------------------------------------------------------------------------------------------------------------------------------------------------------------------------------------------------------------------------------------------------------------------------------------------------------------------------------------------------------------------------------------------------------------------------------------------------------------------------------------------------------------------------------------------------------------------------------------------------------------------------------------------------------------------------------------------------------------------------------------------------------------------------------------------------------------------------------------------------------------------------------------------------------------------------------------------------------------------------------------------------------------------------------------------------------------------------------------------------------------------------------------------------------------------------------------------------------------------------------------------------------------------------------------------------------------------------------------------------------------------------------------------------------------------------------------------------------------------------------------------------------------------------------------------------------------------------------------------------------------------------------------------------------------------------------------------------------------------------------------------------------------------------------------------------------------------------------------------------------------------------------------------------------------------------------------------------------------------------------------------------------------------------------------------------------------------------------------------------------------------------------------------------------------------------------------------------------------------------------------------------------------------------------------------------------------------------------------------------------------------------------------------------------------------------------------------------------------------------------------------------------------------------------------------------------------------------------------------------------------------------------------------------------------------------------------------------------------------------------------------------------------------------------------------------------------------------------------------------------------------------------------------------------------------------------------------------------------------------------------------------------------------------------------------------------------------------------------------------------------------------------------------------------------------------------------------------------------------------------------------------------------------------------------------------------------------------------------------------------------------------------------------------------------------------------------------------------------------------------------------------------------------------------------------------------------------------------------------------------------------------------------------------------------------------------------------------------------------------------------------------------------------------------------------------------------------------------------------------------------------------------------------------------------------------------------------------------------------------------------------------------------------------------------------------------------------------------------------------------------------------------------------------------------------------------|-----------------------------------------------------------------------------------------------------|-----------------------------------------------------------------------------------------------------------------------------------|--------------------------------------------------------------------------------------------------------------------------------------------------------------------------------------------------------------------------------------------------------------------------------------------------------------------------------------------------------------------------------------------------------------------------------------------------------------------------|
|                                                                                                                                                                                                                                                                                                                                                                                                                                                                                                                                                                                                                                                                                                                                                                                                                                                                                                                                                                                                                                                                                                                                                                                                                                                                                                                                                                                                                                                                                                                                                                                                                                                                                                                                                                                                                                                                                                                                                                                                                                                                                                                                                                                                                                                                                                                                                                                                                                                                                                                                                                                                                                                                                                                                                                                                                                                                                                                                                                                                                                                                                                                                                                                                                                                                                                                                                                                                                                                                                                                                                                                                                                                                                                                                                                                                                                                                                                                                                                                                                                                                                                                                                                                                                                                                                                                                                                                                                                                  |                                                                                                     |                                                                                                                                   | Ralph Schlapbach, Christiane Beckmann, Maurice Redondo, Olivier Kobel, Christoph Noppen, Sophie Seidel, Noemie Santamaria de Souza, Niko Beerenwinkel, Tanja Stadler                                                                                                                                                                                                                                                                                                     |
| EPI_ISL_1003864                                                                                                                                                                                                                                                                                                                                                                                                                                                                                                                                                                                                                                                                                                                                                                                                                                                                                                                                                                                                                                                                                                                                                                                                                                                                                                                                                                                                                                                                                                                                                                                                                                                                                                                                                                                                                                                                                                                                                                                                                                                                                                                                                                                                                                                                                                                                                                                                                                                                                                                                                                                                                                                                                                                                                                                                                                                                                                                                                                                                                                                                                                                                                                                                                                                                                                                                                                                                                                                                                                                                                                                                                                                                                                                                                                                                                                                                                                                                                                                                                                                                                                                                                                                                                                                                                                                                                                                                                                  | Viollier AG                                                                                         | Department of Biosystems Science and Engineering, ETH Zürich                                                                      | Christian Beisel, Sarah Nadeau, Chaoran Chen, Ivan Topolsky, Philipp Jablonski, Lara Fuhrmann, David Dreifuss, Katharina Jahn, Rebecca Denes, Ina Nissen, Natascha Santacroce, Elodie Burcklen, Christiane Beckmann, Maurice Redondo, Olivier Kobel, Christoph Noppen, Sophie Seidel, Noemie Santamaria de Souza, Niko Beerenwinkel, Tanja Stadler                                                                                                                       |
| EPI_ISL_1003865, EPI_ISL_1003866                                                                                                                                                                                                                                                                                                                                                                                                                                                                                                                                                                                                                                                                                                                                                                                                                                                                                                                                                                                                                                                                                                                                                                                                                                                                                                                                                                                                                                                                                                                                                                                                                                                                                                                                                                                                                                                                                                                                                                                                                                                                                                                                                                                                                                                                                                                                                                                                                                                                                                                                                                                                                                                                                                                                                                                                                                                                                                                                                                                                                                                                                                                                                                                                                                                                                                                                                                                                                                                                                                                                                                                                                                                                                                                                                                                                                                                                                                                                                                                                                                                                                                                                                                                                                                                                                                                                                                                                                 | Viollier AG                                                                                         | Department of Biosystems Science and Engineering, ETH Zürich                                                                      | Chaoran Chen, Sarah Nadeau, Catharine Aquino, Ivan Topolsky, Philipp Jablonski, Lara Fuhrmann, David Dreifuss, Katharina Jahn, Andreia Cabral de Gouvea, Maria Domenica Moccia, Simon Grüter, Timothy Sykes, Lennart Opitz, Griffin White, Laura Neff, Doris Popovic, Andrea Patrignani, Jay Tracy, Ralph Schlapbach, Christiane Beckmann, Maurice Redondo, Olivier Kobel, Christoph Noppen, Sophie Seidel, Noemie Santamaria de Souza, Niko Beerenwinkel, Tanja Stadler |
| EPI_ISL_1003867, EPI_ISL_1003868                                                                                                                                                                                                                                                                                                                                                                                                                                                                                                                                                                                                                                                                                                                                                                                                                                                                                                                                                                                                                                                                                                                                                                                                                                                                                                                                                                                                                                                                                                                                                                                                                                                                                                                                                                                                                                                                                                                                                                                                                                                                                                                                                                                                                                                                                                                                                                                                                                                                                                                                                                                                                                                                                                                                                                                                                                                                                                                                                                                                                                                                                                                                                                                                                                                                                                                                                                                                                                                                                                                                                                                                                                                                                                                                                                                                                                                                                                                                                                                                                                                                                                                                                                                                                                                                                                                                                                                                                 | Viollier AG                                                                                         | Department of Biosystems Science and Engineering, ETH Zürich                                                                      | Christian Beisel, Sarah Nadeau, Chaoran Chen, Ivan Topolsky, Philipp Jablonski, Lara Fuhrmann, David Dreifuss, Katharina Jahn, Rebecca Denes, Ina Nissen, Natascha Santacroce, Elodie Burcklen, Christiane Beckmann, Maurice Redondo, Olivier Kobel, Christoph Noppen, Sophie Seidel, Noemie Santamaria de Souza, Niko Beerenwinkel, Tanja Stadler                                                                                                                       |
| EPI_ISL_1003869, EPI_ISL_1003870, EPI_ISL_1003872, EPI_ISL_1003873                                                                                                                                                                                                                                                                                                                                                                                                                                                                                                                                                                                                                                                                                                                                                                                                                                                                                                                                                                                                                                                                                                                                                                                                                                                                                                                                                                                                                                                                                                                                                                                                                                                                                                                                                                                                                                                                                                                                                                                                                                                                                                                                                                                                                                                                                                                                                                                                                                                                                                                                                                                                                                                                                                                                                                                                                                                                                                                                                                                                                                                                                                                                                                                                                                                                                                                                                                                                                                                                                                                                                                                                                                                                                                                                                                                                                                                                                                                                                                                                                                                                                                                                                                                                                                                                                                                                                                               | Viollier AG                                                                                         | Department of Biosystems Science and Engineering, ETH Zürich                                                                      | Chaoran Chen, Sarah Nadeau, Catharine Aquino, Ivan Topolsky, Philipp Jablonski, Lara Fuhrmann, David Dreifuss, Katharina Jahn, Andreia Cabral de Gouvea, Maria Domenica Moccia, Simon Grüter, Timothy Sykes, Lennart Opitz, Griffin White, Laura Neff, Doris Popovic, Andrea Patrignani, Jay Tracy, Ralph Schlapbach, Christiane Beckmann, Maurice Redondo, Olivier Kobel, Christoph Noppen, Sophie Seidel, Noemie Santamaria de Souza, Niko Beerenwinkel, Tanja Stadler |
| EPI_ISL_1003877                                                                                                                                                                                                                                                                                                                                                                                                                                                                                                                                                                                                                                                                                                                                                                                                                                                                                                                                                                                                                                                                                                                                                                                                                                                                                                                                                                                                                                                                                                                                                                                                                                                                                                                                                                                                                                                                                                                                                                                                                                                                                                                                                                                                                                                                                                                                                                                                                                                                                                                                                                                                                                                                                                                                                                                                                                                                                                                                                                                                                                                                                                                                                                                                                                                                                                                                                                                                                                                                                                                                                                                                                                                                                                                                                                                                                                                                                                                                                                                                                                                                                                                                                                                                                                                                                                                                                                                                                                  | Viollier AG                                                                                         | Department of Biosystems Science and Engineering, ETH Zürich                                                                      | Christian Beisel, Sarah Nadeau, Chaoran Chen, Ivan Topolsky, Philipp Jablonski, Lara Fuhrmann, David Dreifuss, Katharina Jahn, Rebecca Denes, Ina Nissen, Natascha Santacroce, Elodie Burcklen, Christiane Beckmann, Maurice Redondo, Olivier Kobel, Christoph Noppen, Sophie Seidel, Noemie Santamaria de Souza, Niko Beerenwinkel, Tanja Stadler                                                                                                                       |
| EPI_ISL_1003878, EPI_ISL_1003879                                                                                                                                                                                                                                                                                                                                                                                                                                                                                                                                                                                                                                                                                                                                                                                                                                                                                                                                                                                                                                                                                                                                                                                                                                                                                                                                                                                                                                                                                                                                                                                                                                                                                                                                                                                                                                                                                                                                                                                                                                                                                                                                                                                                                                                                                                                                                                                                                                                                                                                                                                                                                                                                                                                                                                                                                                                                                                                                                                                                                                                                                                                                                                                                                                                                                                                                                                                                                                                                                                                                                                                                                                                                                                                                                                                                                                                                                                                                                                                                                                                                                                                                                                                                                                                                                                                                                                                                                 | Viollier AG                                                                                         | Department of Biosystems Science and Engineering, ETH Zürich                                                                      | Chaoran Chen, Sarah Nadeau, Catharine Aquino, Ivan Topolsky, Philipp Jablonski, Lara Fuhrmann, David Dreifuss, Katharina Jahn, Andreia Cabral de Gouvea, Maria Domenica Moccia, Simon Grüter, Timothy Sykes, Lennart Opitz, Griffin White, Laura Neff, Doris Popovic, Andrea Patrignani, Jay Tracy, Ralph Schlapbach, Christiane Beckmann, Maurice Redondo, Olivier Kobel, Christoph Noppen, Sophie Seidel, Noemie Santamaria de Souza, Niko Beerenwinkel, Tanja Stadler |
| EPI_ISL_1003880, EPI_ISL_1003881                                                                                                                                                                                                                                                                                                                                                                                                                                                                                                                                                                                                                                                                                                                                                                                                                                                                                                                                                                                                                                                                                                                                                                                                                                                                                                                                                                                                                                                                                                                                                                                                                                                                                                                                                                                                                                                                                                                                                                                                                                                                                                                                                                                                                                                                                                                                                                                                                                                                                                                                                                                                                                                                                                                                                                                                                                                                                                                                                                                                                                                                                                                                                                                                                                                                                                                                                                                                                                                                                                                                                                                                                                                                                                                                                                                                                                                                                                                                                                                                                                                                                                                                                                                                                                                                                                                                                                                                                 | Viollier AG                                                                                         | Department of Biosystems Science and Engineering, ETH Zürich                                                                      | Christian Beisel, Sarah Nadeau, Chaoran Chen, Ivan Topolsky, Philipp Jablonski, Lara Fuhrmann, David Dreifuss, Katharina Jahn, Rebecca Denes, Ina Nissen, Natascha Santacroce, Elodie Burcklen, Christiane Beckmann, Maurice Redondo, Olivier Kobel, Christoph Noppen, Sophie Seidel, Noemie Santamaria de Souza, Niko Beerenwinkel, Tanja Stadler                                                                                                                       |
| EPI_ISL_1003882, EPI_ISL_1003883, EPI_ISL_1003885, EPI_ISL_1003886, EPI_ISL_1003888, EPI_ISL_1003889, EPI_ISL_1003890, EPI_ISL_1003891                                                                                                                                                                                                                                                                                                                                                                                                                                                                                                                                                                                                                                                                                                                                                                                                                                                                                                                                                                                                                                                                                                                                                                                                                                                                                                                                                                                                                                                                                                                                                                                                                                                                                                                                                                                                                                                                                                                                                                                                                                                                                                                                                                                                                                                                                                                                                                                                                                                                                                                                                                                                                                                                                                                                                                                                                                                                                                                                                                                                                                                                                                                                                                                                                                                                                                                                                                                                                                                                                                                                                                                                                                                                                                                                                                                                                                                                                                                                                                                                                                                                                                                                                                                                                                                                                                           | Viollier AG                                                                                         | Department of Biosystems Science and Engineering, ETH Zürich                                                                      | Chaoran Chen, Sarah Nadeau, Catharine Aquino, Ivan Topolsky, Philipp Jablonski, Lara Fuhrmann, David Dreifuss, Katharina Jahn, Andreia Cabral de Gouvea, Maria Domenica Moccia, Simon Grüter, Timothy Sykes, Lennart Opitz, Griffin White, Laura Neff, Doris Popovic, Andrea Patrignani, Jay Tracy, Ralph Schlapbach, Christiane Beckmann, Maurice Redondo, Olivier Kobel, Christoph Noppen, Sophie Seidel, Noemie Santamaria de Souza, Niko Beerenwinkel, Tanja Stadler |
| EPI_ISL_1003894                                                                                                                                                                                                                                                                                                                                                                                                                                                                                                                                                                                                                                                                                                                                                                                                                                                                                                                                                                                                                                                                                                                                                                                                                                                                                                                                                                                                                                                                                                                                                                                                                                                                                                                                                                                                                                                                                                                                                                                                                                                                                                                                                                                                                                                                                                                                                                                                                                                                                                                                                                                                                                                                                                                                                                                                                                                                                                                                                                                                                                                                                                                                                                                                                                                                                                                                                                                                                                                                                                                                                                                                                                                                                                                                                                                                                                                                                                                                                                                                                                                                                                                                                                                                                                                                                                                                                                                                                                  | Viollier AG                                                                                         | Department of Biosystems Science and Engineering, ETH Zürich                                                                      | Christian Beisel, Sarah Nadeau, Chaoran Chen, Ivan Topolsky, Philipp Jablonski, Lara Fuhrmann, David Dreifuss, Katharina Jahn, Rebecca Denes, Ina Nissen, Natascha Santacroce, Elodie Burcklen, Christiane Beckmann, Maurice Redondo, Olivier Kobel, Christoph Noppen, Sophie Seidel, Noemie Santamaria de Souza, Niko Beerenwinkel, Tanja Stadler                                                                                                                       |
| EPI_ISL_1003895, EPI_ISL_1003896, EPI_ISL_1003897, EPI_ISL_1003898, EPI_ISL_1003899, EPI_ISL_1003900, EPI_ISL_1003901, EPI_ISL_1003902, EPI_ISL_1003903, EPI_ISL_1003904, EPI_ISL_1003905, EPI_ISL_1003908, EPI_ISL_1003909, EPI_ISL_1003910, EPI_ISL_1003911                                                                                                                                                                                                                                                                                                                                                                                                                                                                                                                                                                                                                                                                                                                                                                                                                                                                                                                                                                                                                                                                                                                                                                                                                                                                                                                                                                                                                                                                                                                                                                                                                                                                                                                                                                                                                                                                                                                                                                                                                                                                                                                                                                                                                                                                                                                                                                                                                                                                                                                                                                                                                                                                                                                                                                                                                                                                                                                                                                                                                                                                                                                                                                                                                                                                                                                                                                                                                                                                                                                                                                                                                                                                                                                                                                                                                                                                                                                                                                                                                                                                                                                                                                                    |                                                                                                     |                                                                                                                                   |                                                                                                                                                                                                                                                                                                                                                                                                                                                                          |
| see above                                                                                                                                                                                                                                                                                                                                                                                                                                                                                                                                                                                                                                                                                                                                                                                                                                                                                                                                                                                                                                                                                                                                                                                                                                                                                                                                                                                                                                                                                                                                                                                                                                                                                                                                                                                                                                                                                                                                                                                                                                                                                                                                                                                                                                                                                                                                                                                                                                                                                                                                                                                                                                                                                                                                                                                                                                                                                                                                                                                                                                                                                                                                                                                                                                                                                                                                                                                                                                                                                                                                                                                                                                                                                                                                                                                                                                                                                                                                                                                                                                                                                                                                                                                                                                                                                                                                                                                                                                        | Viollier AG                                                                                         | Department of Biosystems Science and Engineering, ETH Zürich                                                                      | Chaoran Chen, Sarah Nadeau, Catharine Aquino, Ivan Topolsky, Philipp Jablonski, Lara Fuhrmann, David Dreifuss, Katharina Jahn, Andreia Cabral de Gouvea, Maria Domenica Moccia, Simon Grüter, Timothy Sykes, Lennart Opitz, Griffin White, Laura Neff, Doris Popovic, Andrea Patrignani, Jay Tracy, Ralph Schlapbach, Christiane Beckmann, Maurice Redondo, Olivier Kobel, Christoph Noppen, Sophie Seidel, Noemie Santamaria de Souza, Niko Beerenwinkel, Tanja Stadler |
| EPI_ISL_1003912                                                                                                                                                                                                                                                                                                                                                                                                                                                                                                                                                                                                                                                                                                                                                                                                                                                                                                                                                                                                                                                                                                                                                                                                                                                                                                                                                                                                                                                                                                                                                                                                                                                                                                                                                                                                                                                                                                                                                                                                                                                                                                                                                                                                                                                                                                                                                                                                                                                                                                                                                                                                                                                                                                                                                                                                                                                                                                                                                                                                                                                                                                                                                                                                                                                                                                                                                                                                                                                                                                                                                                                                                                                                                                                                                                                                                                                                                                                                                                                                                                                                                                                                                                                                                                                                                                                                                                                                                                  | Viollier AG                                                                                         | Department of Biosystems Science and Engineering, ETH Zürich                                                                      | Christian Beisel, Sarah Nadeau, Chaoran Chen, Ivan Topolsky, Philipp Jablonski, Lara Fuhrmann, David Dreifuss, Katharina Jahn, Rebecca Denes, Ina Nissen, Natascha Santacroce, Elodie Burcklen, Christiane Beckmann, Maurice Redondo, Olivier Kobel, Christoph Noppen, Sophie Seidel, Noemie Santamaria de Souza, Niko Beerenwinkel, Tanja Stadler                                                                                                                       |
| EPI_ISL_1003914, EPI_ISL_1003915, EPI_ISL_1003917, EPI_ISL_1003918, EPI_ISL_1003920, EPI_ISL_1003921, EPI_ISL_1003922, EPI_ISL_1003923, EPI_ISL_1003924, EPI_ISL_1003925, EPI_ISL_1003926, EPI_ISL_1003927                                                                                                                                                                                                                                                                                                                                                                                                                                                                                                                                                                                                                                                                                                                                                                                                                                                                                                                                                                                                                                                                                                                                                                                                                                                                                                                                                                                                                                                                                                                                                                                                                                                                                                                                                                                                                                                                                                                                                                                                                                                                                                                                                                                                                                                                                                                                                                                                                                                                                                                                                                                                                                                                                                                                                                                                                                                                                                                                                                                                                                                                                                                                                                                                                                                                                                                                                                                                                                                                                                                                                                                                                                                                                                                                                                                                                                                                                                                                                                                                                                                                                                                                                                                                                                       |                                                                                                     |                                                                                                                                   |                                                                                                                                                                                                                                                                                                                                                                                                                                                                          |
| see above                                                                                                                                                                                                                                                                                                                                                                                                                                                                                                                                                                                                                                                                                                                                                                                                                                                                                                                                                                                                                                                                                                                                                                                                                                                                                                                                                                                                                                                                                                                                                                                                                                                                                                                                                                                                                                                                                                                                                                                                                                                                                                                                                                                                                                                                                                                                                                                                                                                                                                                                                                                                                                                                                                                                                                                                                                                                                                                                                                                                                                                                                                                                                                                                                                                                                                                                                                                                                                                                                                                                                                                                                                                                                                                                                                                                                                                                                                                                                                                                                                                                                                                                                                                                                                                                                                                                                                                                                                        | Viollier AG                                                                                         | Department of Biosystems Science and Engineering, ETH Zürich                                                                      | Chaoran Chen, Sarah Nadeau, Catharine Aquino, Ivan Topolsky, Philipp Jablonski, Lara Fuhrmann, David Dreifuss, Katharina Jahn, Andreia Cabral de Gouvea, Maria Domenica Moccia, Simon Grüter, Timothy Sykes, Lennart Opitz, Griffin White, Laura Neff, Doris Popovic, Andrea Patrignani, Jay Tracy, Ralph Schlapbach, Christiane Beckmann, Maurice Redondo, Olivier Kobel, Christoph Noppen, Sophie Seidel, Noemie Santamaria de Souza, Niko Beerenwinkel, Tanja Stadler |
| EPI_ISL_1004174                                                                                                                                                                                                                                                                                                                                                                                                                                                                                                                                                                                                                                                                                                                                                                                                                                                                                                                                                                                                                                                                                                                                                                                                                                                                                                                                                                                                                                                                                                                                                                                                                                                                                                                                                                                                                                                                                                                                                                                                                                                                                                                                                                                                                                                                                                                                                                                                                                                                                                                                                                                                                                                                                                                                                                                                                                                                                                                                                                                                                                                                                                                                                                                                                                                                                                                                                                                                                                                                                                                                                                                                                                                                                                                                                                                                                                                                                                                                                                                                                                                                                                                                                                                                                                                                                                                                                                                                                                  | Cerballiance Port de Bouc                                                                           | Cerba                                                                                                                             | Roig JC, Haim-Boukobza S, Meyer S, Trombert-Paolantoni S, Lecorche E, Roquebert B                                                                                                                                                                                                                                                                                                                                                                                        |
| EPI_ISL_1004263, EPI_ISL_1004264, EPI_ISL_1004265, EPI_ISL_1004266, EPI_ISL_1004268, EPI_ISL_1004269, EPI_ISL_1004270, EPI_ISL_1004271, EPI_ISL_1004272, EPI_ISL_1004273, EPI_ISL_1004274, EPI_ISL_1004275, EPI_ISL_1004276, EPI_ISL_1004277, EPI_ISL_1004278, EPI_ISL_1004280, EPI_ISL_1004281, EPI_ISL_1004282, EPI_ISL_1004285, EPI_ISL_1004286, EPI_ISL_1004287, EPI_ISL_1004290, EPI_ISL_1004292, EPI_ISL_1004293, EPI_ISL_1004294, EPI_ISL_1004296, EPI_ISL_1004297, EPI_ISL_1004298, EPI_ISL_1004299, EPI_ISL_1004300, EPI_ISL_1004301, EPI_ISL_1004302, EPI_ISL_1004303, EPI_ISL_1004304, EPI_ISL_1004305, EPI_ISL_1004306, EPI_ISL_1004307, EPI_ISL_1004308, EPI_ISL_1004313, EPI_ISL_1004314, EPI_ISL_1004316, EPI_ISL_1004317, EPI_ISL_1004318, EPI_ISL_1004319, EPI_ISL_1004320, EPI_ISL_1004321, EPI_ISL_1004323, EPI_ISL_1004324, EPI_ISL_1004325, EPI_ISL_1004337, EPI_ISL_1004338, EPI_ISL_1004339, EPI_ISL_1004340, EPI_ISL_1004342, EPI_ISL_1004343, EPI_ISL_1004344, EPI_ISL_1004345, EPI_ISL_1004346, EPI_ISL_1004347, EPI_ISL_1004348, EPI_ISL_1004349, EPI_ISL_1004350, EPI_ISL_1004352, EPI_ISL_1004354, EPI_ISL_1004359, EPI_ISL_1004362, EPI_ISL_1004364, EPI_ISL_1004365, EPI_ISL_1004366, EPI_ISL_1004367, EPI_ISL_1004369, EPI_ISL_1004370, EPI_ISL_1004371, EPI_ISL_1004372, EPI_ISL_1004374, EPI_ISL_1004375, EPI_ISL_1004405, EPI_ISL_1004407, EPI_ISL_1004408, EPI_ISL_1004410, EPI_ISL_1004411, EPI_ISL_1004412, EPI_ISL_1004414, EPI_ISL_1004415, EPI_ISL_1004417, EPI_ISL_1004418, EPI_ISL_1004419, EPI_ISL_1004420, EPI_ISL_1004421, EPI_ISL_1004422, EPI_ISL_1004423, EPI_ISL_1004424, EPI_ISL_1004425, EPI_ISL_1004427, EPI_ISL_1004431, EPI_ISL_1004433, EPI_ISL_1004434, EPI_ISL_1004435, EPI_ISL_1004436, EPI_ISL_1004437, EPI_ISL_1004438, EPI_ISL_1004439, EPI_ISL_1004440, EPI_ISL_1004442, EPI_ISL_1004443, EPI_ISL_1004444, EPI_ISL_1004445, EPI_ISL_1004447, EPI_ISL_1004448, EPI_ISL_1004449, EPI_ISL_1004450, EPI_ISL_1004451, EPI_ISL_1004453, EPI_ISL_1004454, EPI_ISL_1004455, EPI_ISL_1004456, EPI_ISL_1004457, EPI_ISL_1004458, EPI_ISL_1004459, EPI_ISL_1004460, EPI_ISL_1004463, EPI_ISL_1004464, EPI_ISL_1004465, EPI_ISL_1004466, EPI_ISL_1004467, EPI_ISL_1004468, EPI_ISL_1004469, EPI_ISL_1004470, EPI_ISL_1004471, EPI_ISL_1004477, EPI_ISL_1004485, EPI_ISL_1004486, EPI_ISL_1004491, EPI_ISL_1004494, EPI_ISL_1004495, EPI_ISL_1004497, EPI_ISL_1004499, EPI_ISL_1004501, EPI_ISL_1004502, EPI_ISL_1004503, EPI_ISL_1004504, EPI_ISL_1004505, EPI_ISL_1004506, EPI_ISL_1004507, EPI_ISL_1004509, EPI_ISL_1004510, EPI_ISL_1004511, EPI_ISL_1004513, EPI_ISL_1004514, EPI_ISL_1004515, EPI_ISL_1004516, EPI_ISL_1004518, EPI_ISL_1004519, EPI_ISL_1004520, EPI_ISL_1004521, EPI_ISL_1004523, EPI_ISL_1004524, EPI_ISL_1004525, EPI_ISL_1004526, EPI_ISL_1004528, EPI_ISL_1004530, EPI_ISL_1004531, EPI_ISL_1004533, EPI_ISL_1004534, EPI_ISL_1004535, EPI_ISL_1004536, EPI_ISL_1004540, EPI_ISL_1004541, EPI_ISL_1004543, EPI_ISL_1004544, EPI_ISL_1004546, EPI_ISL_1004547, EPI_ISL_1004548, EPI_ISL_1004549, EPI_ISL_1004550, EPI_ISL_1004551, EPI_ISL_1004564, EPI_ISL_1004577, EPI_ISL_1004578, EPI_ISL_1004579, EPI_ISL_1004581, EPI_ISL_1004583, EPI_ISL_1004584, EPI_ISL_1004585, EPI_ISL_1004587, EPI_ISL_1004589, EPI_ISL_1004592, EPI_ISL_1004593, EPI_ISL_1004594, EPI_ISL_1004595, EPI_ISL_1004596, EPI_ISL_1004597, EPI_ISL_1004598, EPI_ISL_1004599, EPI_ISL_100600, EPI_ISL_100601, EPI_ISL_100602, EPI_ISL_100603, EPI_ISL_100607, EPI_ISL_100615, EPI_ISL_100616, EPI_ISL_100617, EPI_ISL_100618, EPI_ISL_100620, EPI_ISL_100621, EPI_ISL_100622, EPI_ISL_100623, EPI_ISL_100636, EPI_ISL_100639, EPI_ISL_100640, EPI_ISL_100641, EPI_ISL_100642, EPI_ISL_100643, EPI_ISL_100644, EPI_ISL_100644, EPI_ISL_100646, EPI_ISL_100651, EPI_ISL_100654, EPI_ISL_100655, EPI_ISL_100658, EPI_ISL_100659, EPI_ISL_100663, EPI_ISL_100666, EPI_ISL_100667, EPI_ISL_100668, EPI_ISL_100669, EPI_ISL_100670, EPI_ISL_100671, EPI_ISL_100672, EPI_ISL_100674, EPI_ISL_100676, EPI_ISL_100677, EPI_ISL_100681, EPI_ISL_100682, EPI_ISL_100683, EPI_ISL_100684, EPI_ISL_100685, EPI_ISL_100686, EPI_ISL_100687, EPI_ISL_100688, EPI_ISL_100689, EPI_ISL_100690, EPI_ISL_100691, EPI_ISL_100693, EPI_ISL_100695, EPI_ISL_100697, EPI_ISL_100698, EPI_ISL_100699, EPI_ISL_100700, EPI_ISL_100701, EPI_ISL_100702, EPI_ISL_100703, EPI_ISL_100704, EPI_ISL_100705, EPI_ISL_100706 |                                                                                                     |                                                                                                                                   |                                                                                                                                                                                                                                                                                                                                                                                                                                                                          |
| see above                                                                                                                                                                                                                                                                                                                                                                                                                                                                                                                                                                                                                                                                                                                                                                                                                                                                                                                                                                                                                                                                                                                                                                                                                                                                                                                                                                                                                                                                                                                                                                                                                                                                                                                                                                                                                                                                                                                                                                                                                                                                                                                                                                                                                                                                                                                                                                                                                                                                                                                                                                                                                                                                                                                                                                                                                                                                                                                                                                                                                                                                                                                                                                                                                                                                                                                                                                                                                                                                                                                                                                                                                                                                                                                                                                                                                                                                                                                                                                                                                                                                                                                                                                                                                                                                                                                                                                                                                                        | Viollier AG                                                                                         | Department of Biosystems Science and Engineering, ETH Zürich                                                                      | Chaoran Chen, Sarah Nadeau, Catharine Aquino, Ivan Topolsky, Philipp Jablonski, Lara Fuhrmann, David Dreifuss, Katharina Jahn, Andreia Cabral de Gouvea, Maria Domenica Moccia, Simon Grüter, Timothy Sykes, Lennart Opitz, Griffin White, Laura Neff, Doris Popovic, Andrea Patrignani, Jay Tracy, Ralph Schlapbach, Christiane Beckmann, Maurice Redondo, Olivier Kobel, Christoph Noppen, Sophie Seidel, Noemie Santamaria de Souza, Niko Beerenwinkel, Tanja Stadler |
| EPI_ISL_1005538, EPI_ISL_1005539                                                                                                                                                                                                                                                                                                                                                                                                                                                                                                                                                                                                                                                                                                                                                                                                                                                                                                                                                                                                                                                                                                                                                                                                                                                                                                                                                                                                                                                                                                                                                                                                                                                                                                                                                                                                                                                                                                                                                                                                                                                                                                                                                                                                                                                                                                                                                                                                                                                                                                                                                                                                                                                                                                                                                                                                                                                                                                                                                                                                                                                                                                                                                                                                                                                                                                                                                                                                                                                                                                                                                                                                                                                                                                                                                                                                                                                                                                                                                                                                                                                                                                                                                                                                                                                                                                                                                                                                                 | Area of Virology, Serology and Virology Division (SAVID), New South Wales Health Pathology Randwick | Virology Research Laboratory; Area of Virology, Serology and Virology Division (SAVID), New South Wales Health Pathology Randwick | Foster, C.; Au, J.; Ruiz Silva, M.; Deveson, I.; Bull, R.; Van Hal, S.; Rawlinson, W.                                                                                                                                                                                                                                                                                                                                                                                    |
| EPI_ISL_1005670, EPI_ISL_1005672                                                                                                                                                                                                                                                                                                                                                                                                                                                                                                                                                                                                                                                                                                                                                                                                                                                                                                                                                                                                                                                                                                                                                                                                                                                                                                                                                                                                                                                                                                                                                                                                                                                                                                                                                                                                                                                                                                                                                                                                                                                                                                                                                                                                                                                                                                                                                                                                                                                                                                                                                                                                                                                                                                                                                                                                                                                                                                                                                                                                                                                                                                                                                                                                                                                                                                                                                                                                                                                                                                                                                                                                                                                                                                                                                                                                                                                                                                                                                                                                                                                                                                                                                                                                                                                                                                                                                                                                                 | Instituto Nacional de Medicina Genomica                                                             | Instituto Nacional de Medicina Genomica                                                                                           | Hidalgo-Miranda A, Mendoza-Vargas A, Reyes-Grajeda JP, Cisneros-Villanueva M, Cedro-Tanda A,Peñaloza-Figueroa F, Herrera-Montalvo LA                                                                                                                                                                                                                                                                                                                                     |
| EPI_ISL_1005682                                                                                                                                                                                                                                                                                                                                                                                                                                                                                                                                                                                                                                                                                                                                                                                                                                                                                                                                                                                                                                                                                                                                                                                                                                                                                                                                                                                                                                                                                                                                                                                                                                                                                                                                                                                                                                                                                                                                                                                                                                                                                                                                                                                                                                                                                                                                                                                                                                                                                                                                                                                                                                                                                                                                                                                                                                                                                                                                                                                                                                                                                                                                                                                                                                                                                                                                                                                                                                                                                                                                                                                                                                                                                                                                                                                                                                                                                                                                                                                                                                                                                                                                                                                                                                                                                                                                                                                                                                  | Martigues hospital                                                                                  | Cerba                                                                                                                             | Negre V, Vidal B, Olivi M, Benazra M, Haim-Boukobza S, Trombert-Paolantoni S, Lecorche E, Roquebert B                                                                                                                                                                                                                                                                                                                                                                    |
| EPI_ISL_1005686                                                                                                                                                                                                                                                                                                                                                                                                                                                                                                                                                                                                                                                                                                                                                                                                                                                                                                                                                                                                                                                                                                                                                                                                                                                                                                                                                                                                                                                                                                                                                                                                                                                                                                                                                                                                                                                                                                                                                                                                                                                                                                                                                                                                                                                                                                                                                                                                                                                                                                                                                                                                                                                                                                                                                                                                                                                                                                                                                                                                                                                                                                                                                                                                                                                                                                                                                                                                                                                                                                                                                                                                                                                                                                                                                                                                                                                                                                                                                                                                                                                                                                                                                                                                                                                                                                                                                                                                                                  | Cerballiance Bligny                                                                                 | Cerba                                                                                                                             | Collin T, Lesenne A, Olivi M, Ricard B, Benazra M, Delaplace E, Gresset N, Haim-Boukobza S, Trombert-Paolantoni S, Lecorche E, Roquebert B                                                                                                                                                                                                                                                                                                                               |
| EPI_ISL_1005687                                                                                                                                                                                                                                                                                                                                                                                                                                                                                                                                                                                                                                                                                                                                                                                                                                                                                                                                                                                                                                                                                                                                                                                                                                                                                                                                                                                                                                                                                                                                                                                                                                                                                                                                                                                                                                                                                                                                                                                                                                                                                                                                                                                                                                                                                                                                                                                                                                                                                                                                                                                                                                                                                                                                                                                                                                                                                                                                                                                                                                                                                                                                                                                                                                                                                                                                                                                                                                                                                                                                                                                                                                                                                                                                                                                                                                                                                                                                                                                                                                                                                                                                                                                                                                                                                                                                                                                                                                  | Cerballiance Lardy                                                                                  | Cerba                                                                                                                             | Collin T, Lesenne A, Olivi M, Ricard B, Benazra M, Delaplace E, Gresset N, Haim-Boukobza S, Trombert-Paolantoni S, Lecorche E, Roquebert B                                                                                                                                                                                                                                                                                                                               |
| EPI_ISL_1005688                                                                                                                                                                                                                                                                                                                                                                                                                                                                                                                                                                                                                                                                                                                                                                                                                                                                                                                                                                                                                                                                                                                                                                                                                                                                                                                                                                                                                                                                                                                                                                                                                                                                                                                                                                                                                                                                                                                                                                                                                                                                                                                                                                                                                                                                                                                                                                                                                                                                                                                                                                                                                                                                                                                                                                                                                                                                                                                                                                                                                                                                                                                                                                                                                                                                                                                                                                                                                                                                                                                                                                                                                                                                                                                                                                                                                                                                                                                                                                                                                                                                                                                                                                                                                                                                                                                                                                                                                                  | Cerballiance Antony Velpeau                                                                         | Cerba                                                                                                                             | Collin T, Lesenne A, Olivi M, Ricard B, Benazra M, Delaplace E, Gresset N, Haim-Boukobza S, Trombert-Paolantoni S, Lecorche E, Roquebert B                                                                                                                                                                                                                                                                                                                               |



|                                                                                                                                                                                                                                                                                                                                                                                                                                                                                                                                                                                                                                                                                                                                                                                                                                                                                                                                                                                                                                                                                                                                                                                                                                                                                                                                                                                                                                                                                                                                                                                                                                                                                                                                                                                                                                                                                                                                                                                                                                                                                                                                                                                                                                                                                                                                                                                                                                                                                                              |                                                                                                                                          |                                                                                                                                        |                                                                                                                                                                                                                                                                                                             |
|--------------------------------------------------------------------------------------------------------------------------------------------------------------------------------------------------------------------------------------------------------------------------------------------------------------------------------------------------------------------------------------------------------------------------------------------------------------------------------------------------------------------------------------------------------------------------------------------------------------------------------------------------------------------------------------------------------------------------------------------------------------------------------------------------------------------------------------------------------------------------------------------------------------------------------------------------------------------------------------------------------------------------------------------------------------------------------------------------------------------------------------------------------------------------------------------------------------------------------------------------------------------------------------------------------------------------------------------------------------------------------------------------------------------------------------------------------------------------------------------------------------------------------------------------------------------------------------------------------------------------------------------------------------------------------------------------------------------------------------------------------------------------------------------------------------------------------------------------------------------------------------------------------------------------------------------------------------------------------------------------------------------------------------------------------------------------------------------------------------------------------------------------------------------------------------------------------------------------------------------------------------------------------------------------------------------------------------------------------------------------------------------------------------------------------------------------------------------------------------------------------------|------------------------------------------------------------------------------------------------------------------------------------------|----------------------------------------------------------------------------------------------------------------------------------------|-------------------------------------------------------------------------------------------------------------------------------------------------------------------------------------------------------------------------------------------------------------------------------------------------------------|
| EPI_ISL_1006341, EPI_ISL_1006342, EPI_ISL_1006344, EPI_ISL_1006345, EPI_ISL_1006347, EPI_ISL_1006348, EPI_ISL_1006349, EPI_ISL_1006350, EPI_ISL_1006352, EPI_ISL_1006353, EPI_ISL_1006354, EPI_ISL_1006355, EPI_ISL_1006357, EPI_ISL_1006358, EPI_ISL_1006359, EPI_ISL_1006360, EPI_ISL_1006361, EPI_ISL_1006363, EPI_ISL_1006364, EPI_ISL_1006365, EPI_ISL_1006366, EPI_ISL_1006367, EPI_ISL_1006369, EPI_ISL_1006370, EPI_ISL_1006371, EPI_ISL_1006372, EPI_ISL_1006373, EPI_ISL_1006377, EPI_ISL_1006378, EPI_ISL_1006379, EPI_ISL_1006380, EPI_ISL_1006382, EPI_ISL_1006383, EPI_ISL_1006384, EPI_ISL_1006387, EPI_ISL_1006390, EPI_ISL_1006391, EPI_ISL_1006394, EPI_ISL_1006395, EPI_ISL_1006399, EPI_ISL_1006400, EPI_ISL_1006401, EPI_ISL_1006402, EPI_ISL_1006403, EPI_ISL_1006404, EPI_ISL_1006405, EPI_ISL_1006406, EPI_ISL_1006407, EPI_ISL_1006409, EPI_ISL_1006410, EPI_ISL_1006411, EPI_ISL_1006412, EPI_ISL_1006414, EPI_ISL_1006415, EPI_ISL_1006416, EPI_ISL_1006417, EPI_ISL_1006418, EPI_ISL_1006419, EPI_ISL_1006420, EPI_ISL_1006421, EPI_ISL_1006422, EPI_ISL_1006424, EPI_ISL_1006426, EPI_ISL_1006427, EPI_ISL_1006428, EPI_ISL_1006430, EPI_ISL_1006431, EPI_ISL_1006434, EPI_ISL_1006436, EPI_ISL_1006437, EPI_ISL_1006438, EPI_ISL_1006440, EPI_ISL_1006441, EPI_ISL_1006442, EPI_ISL_1006443, EPI_ISL_1006444, EPI_ISL_1006445, EPI_ISL_1006446, EPI_ISL_1006447, EPI_ISL_1006449, EPI_ISL_1006451, EPI_ISL_1006452, EPI_ISL_1006454, EPI_ISL_1006455, EPI_ISL_1006457, EPI_ISL_1006458, EPI_ISL_1006459, EPI_ISL_1006461, EPI_ISL_1006462, EPI_ISL_1006463, EPI_ISL_1006464, EPI_ISL_1006465, EPI_ISL_1006467, EPI_ISL_1006469, EPI_ISL_1006473, EPI_ISL_1006474, EPI_ISL_1006476, EPI_ISL_1006477, EPI_ISL_1006478, EPI_ISL_1006479, EPI_ISL_1006481, EPI_ISL_1006482, EPI_ISL_1006483, EPI_ISL_1006484, EPI_ISL_1006486, EPI_ISL_1006487, EPI_ISL_1006489, EPI_ISL_1006493, EPI_ISL_1006495, EPI_ISL_1006499, EPI_ISL_1006500, EPI_ISL_1006501, EPI_ISL_1006502, EPI_ISL_1006503, EPI_ISL_1006504, EPI_ISL_1006506, EPI_ISL_1006508, EPI_ISL_1006509, EPI_ISL_1006510, EPI_ISL_1006511, EPI_ISL_1006514, EPI_ISL_1006515, EPI_ISL_1006517, EPI_ISL_1006518, EPI_ISL_1006519, EPI_ISL_1006520, EPI_ISL_1006522, EPI_ISL_1006523, EPI_ISL_1006524, EPI_ISL_1006525, EPI_ISL_1006526, EPI_ISL_1006527, EPI_ISL_1006530, EPI_ISL_1006532, EPI_ISL_1006534, EPI_ISL_1006535, EPI_ISL_1006537, EPI_ISL_1006538, EPI_ISL_1006546, EPI_ISL_1006971, EPI_ISL_1007015, EPI_ISL_1007083 |                                                                                                                                          |                                                                                                                                        |                                                                                                                                                                                                                                                                                                             |
| see above                                                                                                                                                                                                                                                                                                                                                                                                                                                                                                                                                                                                                                                                                                                                                                                                                                                                                                                                                                                                                                                                                                                                                                                                                                                                                                                                                                                                                                                                                                                                                                                                                                                                                                                                                                                                                                                                                                                                                                                                                                                                                                                                                                                                                                                                                                                                                                                                                                                                                                    | Lighthouse Lab in Milton Keynes                                                                                                          | Wellcome Sanger Institute for the COVID-19 Genomics UK (COG-UK) Consortium                                                             | The Lighthouse Lab in Milton Keynes and Alex Alderton, Roberto Amato, Sonia Goncalves, Ewan Harrison, David K. Jackson, Ian Johnston, Dominic Kwiatkowski, Cordelia Langford, John Sillitoe on behalf of the Wellcome Sanger Institute COVID-19 Surveillance Team                                           |
| EPI_ISL_1007434                                                                                                                                                                                                                                                                                                                                                                                                                                                                                                                                                                                                                                                                                                                                                                                                                                                                                                                                                                                                                                                                                                                                                                                                                                                                                                                                                                                                                                                                                                                                                                                                                                                                                                                                                                                                                                                                                                                                                                                                                                                                                                                                                                                                                                                                                                                                                                                                                                                                                              | Lighthouse Lab in Glasgow                                                                                                                | Wellcome Sanger Institute for the COVID-19 Genomics UK (COG-UK) Consortium                                                             | Harper VanSteenhouse, Yumi Kasai, David Gray, Carol Clugston, Anna Dominiczak and Alex Alderton, Roberto Amato, Sonia Goncalves, Ewan Harrison, David K. Jackson, Ian Johnston, Dominic Kwiatkowski, Cordelia Langford, John Sillitoe on behalf of the Wellcome Sanger Institute COVID-19 Surveillance Team |
| EPI_ISL_1007435                                                                                                                                                                                                                                                                                                                                                                                                                                                                                                                                                                                                                                                                                                                                                                                                                                                                                                                                                                                                                                                                                                                                                                                                                                                                                                                                                                                                                                                                                                                                                                                                                                                                                                                                                                                                                                                                                                                                                                                                                                                                                                                                                                                                                                                                                                                                                                                                                                                                                              | Lighthouse Lab in Cambridge                                                                                                              | Wellcome Sanger Institute for the COVID-19 Genomics UK (COG-UK) Consortium                                                             | Rob Howes, The Lighthouse Lab in Cambridge and Alex Alderton, Roberto Amato, Sonia Goncalves, Ewan Harrison, David K. Jackson, Ian Johnston, Dominic Kwiatkowski, Cordelia Langford, John Sillitoe on behalf of the Wellcome Sanger Institute COVID-19 Surveillance Team                                    |
| EPI_ISL_1007441, EPI_ISL_1007444                                                                                                                                                                                                                                                                                                                                                                                                                                                                                                                                                                                                                                                                                                                                                                                                                                                                                                                                                                                                                                                                                                                                                                                                                                                                                                                                                                                                                                                                                                                                                                                                                                                                                                                                                                                                                                                                                                                                                                                                                                                                                                                                                                                                                                                                                                                                                                                                                                                                             | Lighthouse Lab in Alderley Park                                                                                                          | Wellcome Sanger Institute for the COVID-19 Genomics UK (COG-UK) Consortium                                                             | Jacquelyn Wynn, Mairead Hyland, The Lighthouse Lab in Alderley Park and Alex Alderton, Roberto Amato, Sonia Goncalves, Ewan Harrison, David K. Jackson, Ian Johnston, Dominic Kwiatkowski, Cordelia Langford, John Sillitoe on behalf of the Wellcome Sanger Institute COVID-19 Surveillance Team           |
| EPI_ISL_1007525                                                                                                                                                                                                                                                                                                                                                                                                                                                                                                                                                                                                                                                                                                                                                                                                                                                                                                                                                                                                                                                                                                                                                                                                                                                                                                                                                                                                                                                                                                                                                                                                                                                                                                                                                                                                                                                                                                                                                                                                                                                                                                                                                                                                                                                                                                                                                                                                                                                                                              | Lighthouse Lab in Cambridge                                                                                                              | Wellcome Sanger Institute for the COVID-19 Genomics UK (COG-UK) Consortium                                                             | Rob Howes, The Lighthouse Lab in Cambridge and Alex Alderton, Roberto Amato, Sonia Goncalves, Ewan Harrison, David K. Jackson, Ian Johnston, Dominic Kwiatkowski, Cordelia Langford, John Sillitoe on behalf of the Wellcome Sanger Institute COVID-19 Surveillance Team                                    |
| EPI_ISL_1007527                                                                                                                                                                                                                                                                                                                                                                                                                                                                                                                                                                                                                                                                                                                                                                                                                                                                                                                                                                                                                                                                                                                                                                                                                                                                                                                                                                                                                                                                                                                                                                                                                                                                                                                                                                                                                                                                                                                                                                                                                                                                                                                                                                                                                                                                                                                                                                                                                                                                                              | Lighthouse Lab in Milton Keynes                                                                                                          | Wellcome Sanger Institute for the COVID-19 Genomics UK (COG-UK) Consortium                                                             | The Lighthouse Lab in Milton Keynes and Alex Alderton, Roberto Amato, Sonia Goncalves, Ewan Harrison, David K. Jackson, Ian Johnston, Dominic Kwiatkowski, Cordelia Langford, John Sillitoe on behalf of the Wellcome Sanger Institute COVID-19 Surveillance Team                                           |
| EPI_ISL_1007550, EPI_ISL_1007551, EPI_ISL_1007553, EPI_ISL_1007555, EPI_ISL_1007558, EPI_ISL_1007564, EPI_ISL_1007566, EPI_ISL_1007567, EPI_ISL_1007568, EPI_ISL_1007570, EPI_ISL_1007571, EPI_ISL_1007573                                                                                                                                                                                                                                                                                                                                                                                                                                                                                                                                                                                                                                                                                                                                                                                                                                                                                                                                                                                                                                                                                                                                                                                                                                                                                                                                                                                                                                                                                                                                                                                                                                                                                                                                                                                                                                                                                                                                                                                                                                                                                                                                                                                                                                                                                                   |                                                                                                                                          |                                                                                                                                        |                                                                                                                                                                                                                                                                                                             |
| see above                                                                                                                                                                                                                                                                                                                                                                                                                                                                                                                                                                                                                                                                                                                                                                                                                                                                                                                                                                                                                                                                                                                                                                                                                                                                                                                                                                                                                                                                                                                                                                                                                                                                                                                                                                                                                                                                                                                                                                                                                                                                                                                                                                                                                                                                                                                                                                                                                                                                                                    | Lighthouse Lab in Alderley Park                                                                                                          | Wellcome Sanger Institute for the COVID-19 Genomics UK (COG-UK) Consortium                                                             | Jacquelyn Wynn, Mairead Hyland, The Lighthouse Lab in Alderley Park and Alex Alderton, Roberto Amato, Sonia Goncalves, Ewan Harrison, David K. Jackson, Ian Johnston, Dominic Kwiatkowski, Cordelia Langford, John Sillitoe on behalf of the Wellcome Sanger Institute COVID-19 Surveillance Team           |
| EPI_ISL_1007575                                                                                                                                                                                                                                                                                                                                                                                                                                                                                                                                                                                                                                                                                                                                                                                                                                                                                                                                                                                                                                                                                                                                                                                                                                                                                                                                                                                                                                                                                                                                                                                                                                                                                                                                                                                                                                                                                                                                                                                                                                                                                                                                                                                                                                                                                                                                                                                                                                                                                              | Lighthouse Lab in Milton Keynes                                                                                                          | Wellcome Sanger Institute for the COVID-19 Genomics UK (COG-UK) Consortium                                                             | The Lighthouse Lab in Milton Keynes and Alex Alderton, Roberto Amato, Sonia Goncalves, Ewan Harrison, David K. Jackson, Ian Johnston, Dominic Kwiatkowski, Cordelia Langford, John Sillitoe on behalf of the Wellcome Sanger Institute COVID-19 Surveillance Team                                           |
| EPI_ISL_1007581, EPI_ISL_1007582                                                                                                                                                                                                                                                                                                                                                                                                                                                                                                                                                                                                                                                                                                                                                                                                                                                                                                                                                                                                                                                                                                                                                                                                                                                                                                                                                                                                                                                                                                                                                                                                                                                                                                                                                                                                                                                                                                                                                                                                                                                                                                                                                                                                                                                                                                                                                                                                                                                                             | Lighthouse Lab in Alderley Park                                                                                                          | Wellcome Sanger Institute for the COVID-19 Genomics UK (COG-UK) Consortium                                                             | Jacquelyn Wynn, Mairead Hyland, The Lighthouse Lab in Alderley Park and Alex Alderton, Roberto Amato, Sonia Goncalves, Ewan Harrison, David K. Jackson, Ian Johnston, Dominic Kwiatkowski, Cordelia Langford, John Sillitoe on behalf of the Wellcome Sanger Institute COVID-19 Surveillance Team           |
| EPI_ISL_1007583                                                                                                                                                                                                                                                                                                                                                                                                                                                                                                                                                                                                                                                                                                                                                                                                                                                                                                                                                                                                                                                                                                                                                                                                                                                                                                                                                                                                                                                                                                                                                                                                                                                                                                                                                                                                                                                                                                                                                                                                                                                                                                                                                                                                                                                                                                                                                                                                                                                                                              | Lighthouse Lab in Cambridge                                                                                                              | Wellcome Sanger Institute for the COVID-19 Genomics UK (COG-UK) Consortium                                                             | Rob Howes, The Lighthouse Lab in Cambridge and Alex Alderton, Roberto Amato, Sonia Goncalves, Ewan Harrison, David K. Jackson, Ian Johnston, Dominic Kwiatkowski, Cordelia Langford, John Sillitoe on behalf of the Wellcome Sanger Institute COVID-19 Surveillance Team                                    |
| EPI_ISL_1007586, EPI_ISL_1007593, EPI_ISL_1007599, EPI_ISL_1007600                                                                                                                                                                                                                                                                                                                                                                                                                                                                                                                                                                                                                                                                                                                                                                                                                                                                                                                                                                                                                                                                                                                                                                                                                                                                                                                                                                                                                                                                                                                                                                                                                                                                                                                                                                                                                                                                                                                                                                                                                                                                                                                                                                                                                                                                                                                                                                                                                                           | CHUV                                                                                                                                     | Laboratory of genomics and metagenomics, Institute of Microbiology, University Hospital Centre and University of Lausanne, Switzerland | Trestan Pillonel, Damien Jacot, Sébastien Aeby, Gilbert Greub, Claire Bertelli                                                                                                                                                                                                                              |
| EPI_ISL_1007607, EPI_ISL_1007608                                                                                                                                                                                                                                                                                                                                                                                                                                                                                                                                                                                                                                                                                                                                                                                                                                                                                                                                                                                                                                                                                                                                                                                                                                                                                                                                                                                                                                                                                                                                                                                                                                                                                                                                                                                                                                                                                                                                                                                                                                                                                                                                                                                                                                                                                                                                                                                                                                                                             | ADMED                                                                                                                                    | Laboratory of genomics and metagenomics, Institute of Microbiology, University Hospital Centre and University of Lausanne, Switzerland | Trestan Pillonel, Damien Jacot, Sébastien Aeby, Gilbert Greub, Claire Bertelli                                                                                                                                                                                                                              |
| EPI_ISL_1007643, EPI_ISL_1007646, EPI_ISL_1007647, EPI_ISL_1007650, EPI_ISL_1007651, EPI_ISL_1007652                                                                                                                                                                                                                                                                                                                                                                                                                                                                                                                                                                                                                                                                                                                                                                                                                                                                                                                                                                                                                                                                                                                                                                                                                                                                                                                                                                                                                                                                                                                                                                                                                                                                                                                                                                                                                                                                                                                                                                                                                                                                                                                                                                                                                                                                                                                                                                                                         | Division of Emerging Infectious Diseases, Bureau of Infectious Diseases Diagnosis Control, Korea Disease Control and Prevention Agency   | Division of Emerging Infectious Diseases, Bureau of Infectious Diseases Diagnosis Control, Korea Disease Control and Prevention Agency | Ae Kyung Park, Il-Hwan Kim, Heui Man Kim, Jeong-Min Kim, Namjoo Lee, Chae Young Lee, Sang Hee Woo, Eun-Jin Kim                                                                                                                                                                                              |
| EPI_ISL_1007721, EPI_ISL_1007729, EPI_ISL_1007733, EPI_ISL_1007739, EPI_ISL_1007740, EPI_ISL_1007741                                                                                                                                                                                                                                                                                                                                                                                                                                                                                                                                                                                                                                                                                                                                                                                                                                                                                                                                                                                                                                                                                                                                                                                                                                                                                                                                                                                                                                                                                                                                                                                                                                                                                                                                                                                                                                                                                                                                                                                                                                                                                                                                                                                                                                                                                                                                                                                                         | Servicio de Microbiología Clínica (Complejo Hospitalario de Navarra, Pamplona), Instituto de Investigación Sanitaria de Navarra (IdiSNA) | SeqCOVID-SPAIN consortium/IBV(CSIC)                                                                                                    | Carmen Ezpeleta Baquedano, Ana Navascués, Ana Miqueliez and SeqCOVID-SPAIN consortium                                                                                                                                                                                                                       |
| EPI_ISL_1007745                                                                                                                                                                                                                                                                                                                                                                                                                                                                                                                                                                                                                                                                                                                                                                                                                                                                                                                                                                                                                                                                                                                                                                                                                                                                                                                                                                                                                                                                                                                                                                                                                                                                                                                                                                                                                                                                                                                                                                                                                                                                                                                                                                                                                                                                                                                                                                                                                                                                                              | Ohio Department of Health Laboratory                                                                                                     | Ohio Department of Health Laboratory                                                                                                   | Holmes, Jennifer; Eric Brandt, Keoni Omura, Glen McGillivray, Caitlin McDonnell, Jade Mowery, Stephanie Mccracken, Tyler Payne, Kirtana Ramadugu, Erica Leasure, Brent Lee, Kelsey Florek, Heather Blankenship, Quanta Brown, and Tammy Bannerman                                                           |
| EPI_ISL_1007764, EPI_ISL_1007765, EPI_ISL_1007767                                                                                                                                                                                                                                                                                                                                                                                                                                                                                                                                                                                                                                                                                                                                                                                                                                                                                                                                                                                                                                                                                                                                                                                                                                                                                                                                                                                                                                                                                                                                                                                                                                                                                                                                                                                                                                                                                                                                                                                                                                                                                                                                                                                                                                                                                                                                                                                                                                                            | Hospital Universitario Virgen de las Nieves de Granada-SAS                                                                               | SeqCOVID-SPAIN consortium/IBV(CSIC)                                                                                                    | Sara Sanbonmatsu Gámez, Mercedes Pérez Ruiz, Irene Pedrosa Corral, José M. Navarro-Mari and SeqCOVID-SPAIN consortium                                                                                                                                                                                       |
| EPI_ISL_1007774, EPI_ISL_1007801, EPI_ISL_1007802, EPI_ISL_1007803, EPI_ISL_1007808                                                                                                                                                                                                                                                                                                                                                                                                                                                                                                                                                                                                                                                                                                                                                                                                                                                                                                                                                                                                                                                                                                                                                                                                                                                                                                                                                                                                                                                                                                                                                                                                                                                                                                                                                                                                                                                                                                                                                                                                                                                                                                                                                                                                                                                                                                                                                                                                                          | Hospital Universitario Marqués de Valdecilla - IDIVAL (Santander, Cantabria)                                                             | SeqCOVID-SPAIN consortium/IBV(CSIC)                                                                                                    | Mónica Gozalo Margüello, María Eleicer Cano García, Jose Manuel Méndez Legaza, Daniel Pablo Marcos, Jesús Rodríguez Rodríguez, María Siller Ruiz and SeqCOVID-SPAIN consortium                                                                                                                              |
| EPI_ISL_1007809                                                                                                                                                                                                                                                                                                                                                                                                                                                                                                                                                                                                                                                                                                                                                                                                                                                                                                                                                                                                                                                                                                                                                                                                                                                                                                                                                                                                                                                                                                                                                                                                                                                                                                                                                                                                                                                                                                                                                                                                                                                                                                                                                                                                                                                                                                                                                                                                                                                                                              | Ohio Department of Health Laboratory                                                                                                     | Ohio Department of Health Laboratory                                                                                                   | Holmes, Jennifer; Eric Brandt, Keoni Omura, Glen McGillivray, Caitlin McDonnell, Jade Mowery, Stephanie Mccracken, Tyler Payne, Kirtana Ramadugu, Erica Leasure, Brent Lee, Kelsey Florek, Heather Blankenship, Quanta Brown, and Tammy Bannerman                                                           |
| EPI_ISL_1007819                                                                                                                                                                                                                                                                                                                                                                                                                                                                                                                                                                                                                                                                                                                                                                                                                                                                                                                                                                                                                                                                                                                                                                                                                                                                                                                                                                                                                                                                                                                                                                                                                                                                                                                                                                                                                                                                                                                                                                                                                                                                                                                                                                                                                                                                                                                                                                                                                                                                                              | Hospital Universitario Marqués de Valdecilla - IDIVAL (Santander, Cantabria)                                                             | SeqCOVID-SPAIN consortium/IBV(CSIC)                                                                                                    | Mónica Gozalo Margüello, María Eleicer Cano García, Jose Manuel Méndez Legaza, Daniel Pablo Marcos, Jesús Rodríguez Rodríguez, María Siller Ruiz and SeqCOVID-SPAIN consortium                                                                                                                              |
| EPI_ISL_1007835, EPI_ISL_1007837, EPI_ISL_1007838, EPI_ISL_1007840, EPI_ISL_1007842, EPI_ISL_1007846, EPI_ISL_1007848, EPI_ISL_1007849                                                                                                                                                                                                                                                                                                                                                                                                                                                                                                                                                                                                                                                                                                                                                                                                                                                                                                                                                                                                                                                                                                                                                                                                                                                                                                                                                                                                                                                                                                                                                                                                                                                                                                                                                                                                                                                                                                                                                                                                                                                                                                                                                                                                                                                                                                                                                                       | Servicio de Microbiología, Hospital Universitario Central de Asturias                                                                    | SeqCOVID-SPAIN consortium/IBV(CSIC)                                                                                                    | Cristián Castelló Abietar, Jose A. Boga, Susana Rojo-Alba, Marta Elena Álvarez-Argüelles, Santiago Melón and SeqCOVID-SPAIN consortium                                                                                                                                                                      |
| EPI_ISL_1007951, EPI_ISL_1007952, EPI_ISL_1007953, EPI_ISL_1007961, EPI_ISL_1007983                                                                                                                                                                                                                                                                                                                                                                                                                                                                                                                                                                                                                                                                                                                                                                                                                                                                                                                                                                                                                                                                                                                                                                                                                                                                                                                                                                                                                                                                                                                                                                                                                                                                                                                                                                                                                                                                                                                                                                                                                                                                                                                                                                                                                                                                                                                                                                                                                          | genXone SA, Molecular Diagnostics Laboratory / NZOZ                                                                                      | genXone SA, Research & Development Laboratory                                                                                          | Maciej Sykulski, Grzegorz Nowicki, Jakub Grabowski, Natalia Drwska-Matelska, Anna Brylak-Baszków, Aleksandra Gidlewicz, Karol Szeszko, ukasz Krych, Micha Kaszuba                                                                                                                                           |
| EPI_ISL_1008005, EPI_ISL_1008006, EPI_ISL_1008007, EPI_ISL_1008008, EPI_ISL_1008009                                                                                                                                                                                                                                                                                                                                                                                                                                                                                                                                                                                                                                                                                                                                                                                                                                                                                                                                                                                                                                                                                                                                                                                                                                                                                                                                                                                                                                                                                                                                                                                                                                                                                                                                                                                                                                                                                                                                                                                                                                                                                                                                                                                                                                                                                                                                                                                                                          | Klinikum Wels-Grieskirchen                                                                                                               | Bergthaler laboratory, CeMM Research Center for Molecular Medicine of the Austrian Academy of Sciences                                 | Lukas Endler, Anna Schedl, Thomas Penz, Benedikt Agerer, Maelle Le Moing, Michael Schuster, Bekir Erguner, Jan Laine, Martin Senekowitsch, Christoph Bock, Andreas Bergthaler                                                                                                                               |
| EPI_ISL_1008020, EPI_ISL_1008023, EPI_ISL_1008024, EPI_ISL_1008027, EPI_ISL_1008029, EPI_ISL_1008031, EPI_ISL_1008032, EPI_ISL_1008033, EPI_ISL_1008034, EPI_ISL_1008035, EPI_ISL_1008036, EPI_ISL_1008037, EPI_ISL_1008038, EPI_ISL_1008040, EPI_ISL_1008042, EPI_ISL_1008043, EPI_ISL_1008047, EPI_ISL_1008048, EPI_ISL_1008049, EPI_ISL_1008050, EPI_ISL_1008053, EPI_ISL_1008054, EPI_ISL_1008058, EPI_ISL_1008060, EPI_ISL_1008061, EPI_ISL_1008062, EPI_ISL_1008066, EPI_ISL_1008068, EPI_ISL_1008069, EPI_ISL_1008071, EPI_ISL_1008072, EPI_ISL_1008075, EPI_ISL_1008076, EPI_ISL_1008077, EPI_ISL_1008079, EPI_ISL_1008081, EPI_ISL_1008083, EPI_ISL_1008084, EPI_ISL_1008085, EPI_ISL_1008086, EPI_ISL_1008087, EPI_ISL_1008089, EPI_ISL_1008092, EPI_ISL_1008093, EPI_ISL_1008094, EPI_ISL_1008096, EPI_ISL_1008097, EPI_ISL_1008098, EPI_ISL_1008099, EPI_ISL_1008100, EPI_ISL_1008101, EPI_ISL_1008102, EPI_ISL_1008103, EPI_ISL_1008104, EPI_ISL_1008105, EPI_ISL_1008177, EPI_ISL_1008181, EPI_ISL_1008182, EPI_ISL_1008183, EPI_ISL_1008184, EPI_ISL_1008185, EPI_ISL_1008187, EPI_ISL_1008190, EPI_ISL_1008191                                                                                                                                                                                                                                                                                                                                                                                                                                                                                                                                                                                                                                                                                                                                                                                                                                                                                                                                                                                                                                                                                                                                                                                                                                                                                                                                                                               |                                                                                                                                          |                                                                                                                                        |                                                                                                                                                                                                                                                                                                             |
| see above                                                                                                                                                                                                                                                                                                                                                                                                                                                                                                                                                                                                                                                                                                                                                                                                                                                                                                                                                                                                                                                                                                                                                                                                                                                                                                                                                                                                                                                                                                                                                                                                                                                                                                                                                                                                                                                                                                                                                                                                                                                                                                                                                                                                                                                                                                                                                                                                                                                                                                    | Austrian Agency for Health and Food Safety (AGES)                                                                                        | Bergthaler laboratory, CeMM Research Center for Molecular Medicine of the Austrian Academy of Sciences                                 | Lukas Endler, Anna Schedl, Thomas Penz, Benedikt Agerer, Maelle Le Moing, Michael Schuster, Bekir Erguner, Jan Laine, Martin Senekowitsch, Christoph Bock, Andreas Bergthaler                                                                                                                               |
| EPI_ISL_1008192, EPI_ISL_1008193, EPI_ISL_1008194, EPI_ISL_1008195,                                                                                                                                                                                                                                                                                                                                                                                                                                                                                                                                                                                                                                                                                                                                                                                                                                                                                                                                                                                                                                                                                                                                                                                                                                                                                                                                                                                                                                                                                                                                                                                                                                                                                                                                                                                                                                                                                                                                                                                                                                                                                                                                                                                                                                                                                                                                                                                                                                          | Institut für Pathologie, Salzkammergut Klinikum Vöcklabruck                                                                              | Bergthaler laboratory, CeMM Research Center for Molecular Medicine of the Austrian Academy of Sciences                                 | Lukas Endler, Anna Schedl, Thomas Penz, Benedikt Agerer, Maelle Le Moing, Michael Schuster, Bekir Erguner, Jan Laine, Martin Senekowitsch, Christoph Bock, Andreas Bergthaler                                                                                                                               |

|                                                                                                                                                                                                                                                                                                                                                                                                                                                          |                                                                                                          |                                                                                                         |                                                                                                                                                                                                                                                   |
|----------------------------------------------------------------------------------------------------------------------------------------------------------------------------------------------------------------------------------------------------------------------------------------------------------------------------------------------------------------------------------------------------------------------------------------------------------|----------------------------------------------------------------------------------------------------------|---------------------------------------------------------------------------------------------------------|---------------------------------------------------------------------------------------------------------------------------------------------------------------------------------------------------------------------------------------------------|
| EPI_ISL_1008196, EPI_ISL_1008197, EPI_ISL_1008198, EPI_ISL_1008199, EPI_ISL_1008200, EPI_ISL_1008201                                                                                                                                                                                                                                                                                                                                                     |                                                                                                          |                                                                                                         |                                                                                                                                                                                                                                                   |
| EPI_ISL_1008205                                                                                                                                                                                                                                                                                                                                                                                                                                          | Diagnostic & Research Inst. Of Hygiene, Microbiology and Environmental Medicine, Medical University Graz | Berghthaler laboratory, CeMM Research Center for Molecular Medicine of the Austrian Academy of Sciences | Lukas Endler, Anna Schedl, Thomas Penz, Benedikt Agerer, Maelle Le Moing, Michael Schuster, Bekir Erguner, Jan Laine, Martin Senekowitsch, Christoph Bock, Andreas Berghthaler                                                                    |
| EPI_ISL_1008207, EPI_ISL_1008208, EPI_ISL_1008209                                                                                                                                                                                                                                                                                                                                                                                                        | Ludwig Boltzmann Institut für Experimentelle und Klinische Traumatologie, Lorenz Böhler UKH              | Berghthaler laboratory, CeMM Research Center for Molecular Medicine of the Austrian Academy of Sciences | Lukas Endler, Anna Schedl, Thomas Penz, Benedikt Agerer, Maelle Le Moing, Michael Schuster, Bekir Erguner, Jan Laine, Martin Senekowitsch, Christoph Bock, Andreas Berghthaler                                                                    |
| EPI_ISL_1008210                                                                                                                                                                                                                                                                                                                                                                                                                                          | Diagnostic & Research Inst. Of Hygiene, Microbiology and Environmental Medicine, Medical University Graz | Berghthaler laboratory, CeMM Research Center for Molecular Medicine of the Austrian Academy of Sciences | Lukas Endler, Anna Schedl, Thomas Penz, Benedikt Agerer, Maelle Le Moing, Michael Schuster, Bekir Erguner, Jan Laine, Martin Senekowitsch, Christoph Bock, Andreas Berghthaler                                                                    |
| EPI_ISL_1008213, EPI_ISL_1008214                                                                                                                                                                                                                                                                                                                                                                                                                         | Institute for Medical and Chemical Laboratory Diagnostics, Kepler Universitätsklinikum                   | Berghthaler laboratory, CeMM Research Center for Molecular Medicine of the Austrian Academy of Sciences | Lukas Endler, Anna Schedl, Thomas Penz, Benedikt Agerer, Maelle Le Moing, Michael Schuster, Bekir Erguner, Jan Laine, Martin Senekowitsch, Christoph Bock, Andreas Berghthaler                                                                    |
| EPI_ISL_1008217, EPI_ISL_1008220, EPI_ISL_1008221, EPI_ISL_1008222, EPI_ISL_1008223, EPI_ISL_1008224, EPI_ISL_1008230, EPI_ISL_1008233, EPI_ISL_1008241, EPI_ISL_1008242, EPI_ISL_1008245, EPI_ISL_1008247                                                                                                                                                                                                                                               |                                                                                                          |                                                                                                         |                                                                                                                                                                                                                                                   |
| see above                                                                                                                                                                                                                                                                                                                                                                                                                                                | Department of Laboratory Medicine, Division of Clinical Virology, University of Medicine, Vienna         | Berghthaler laboratory, CeMM Research Center for Molecular Medicine of the Austrian Academy of Sciences | Lukas Endler, Anna Schedl, Thomas Penz, Benedikt Agerer, Maelle Le Moing, Michael Schuster, Bekir Erguner, Jan Laine, Martin Senekowitsch, Christoph Bock, Andreas Berghthaler                                                                    |
| EPI_ISL_1008273                                                                                                                                                                                                                                                                                                                                                                                                                                          | Institute for Water Quality and Resource Management, Technical University Vienna                         | Berghthaler laboratory, CeMM Research Center for Molecular Medicine of the Austrian Academy of Sciences | Lukas Endler, Anna Schedl, Thomas Penz, Benedikt Agerer, Maelle Le Moing, Michael Schuster, Bekir Erguner, Jan Laine, Martin Senekowitsch, Christoph Bock, Andreas Berghthaler                                                                    |
| EPI_ISL_1008283, EPI_ISL_1008286                                                                                                                                                                                                                                                                                                                                                                                                                         | Department of Microbiology, University Innsbruck                                                         | Berghthaler laboratory, CeMM Research Center for Molecular Medicine of the Austrian Academy of Sciences | Lukas Endler, Anna Schedl, Thomas Penz, Benedikt Agerer, Maelle Le Moing, Michael Schuster, Bekir Erguner, Jan Laine, Martin Senekowitsch, Christoph Bock, Andreas Berghthaler                                                                    |
| EPI_ISL_1008292, EPI_ISL_1008293, EPI_ISL_1008294, EPI_ISL_1008296, EPI_ISL_1008297                                                                                                                                                                                                                                                                                                                                                                      | Klinikum Wels-Grieskirchen                                                                               | Berghthaler laboratory, CeMM Research Center for Molecular Medicine of the Austrian Academy of Sciences | Lukas Endler, Anna Schedl, Thomas Penz, Benedikt Agerer, Maelle Le Moing, Michael Schuster, Bekir Erguner, Jan Laine, Martin Senekowitsch, Christoph Bock, Andreas Berghthaler                                                                    |
| EPI_ISL_1008333, EPI_ISL_1008346, EPI_ISL_1008348, EPI_ISL_1008349, EPI_ISL_1008350, EPI_ISL_1008351, EPI_ISL_1008352, EPI_ISL_1008377, EPI_ISL_1008382, EPI_ISL_1008386, EPI_ISL_1008387, EPI_ISL_1008388                                                                                                                                                                                                                                               |                                                                                                          |                                                                                                         |                                                                                                                                                                                                                                                   |
| see above                                                                                                                                                                                                                                                                                                                                                                                                                                                | Department of Laboratory Medicine, Division of Clinical Virology, University of Medicine, Vienna         | Berghthaler laboratory, CeMM Research Center for Molecular Medicine of the Austrian Academy of Sciences | Lukas Endler, Anna Schedl, Thomas Penz, Benedikt Agerer, Maelle Le Moing, Michael Schuster, Bekir Erguner, Jan Laine, Martin Senekowitsch, Christoph Bock, Andreas Berghthaler                                                                    |
| EPI_ISL_1008389, EPI_ISL_1008390, EPI_ISL_1008394                                                                                                                                                                                                                                                                                                                                                                                                        | Ohio Department of Health Laboratory                                                                     | Ohio Department of Health Laboratory                                                                    | Holmes, Jennifer; Eric Brandt, Keoni Omura, Glen McGillivray, Caitlin McDonnell, Jade Mowery, Stephanie Mccracken, Tyler Payne, Kirtana Ramadugu, Erica Leasure, Brent Lee, Kelsey Florek, Heather Blankenship, Quanta Brown, and Tammy Bannerman |
| EPI_ISL_1008396, EPI_ISL_1008399                                                                                                                                                                                                                                                                                                                                                                                                                         | Narhalsan Fjallbacka VC                                                                                  | The Public Health Agency of Sweden                                                                      | Anna-Malin Linde, Maria Lind Karlberg, Carlo Berg, Oskar Karlsson Lindsjo, Sofia Stamouli, Reza Advani, Mattias Haukland, Petra Holmstrom, Noura Walai, Petra Edquist, Mia Brytting, Anna Risberg, Karin Tegmark-Wisell                           |
| EPI_ISL_1008400                                                                                                                                                                                                                                                                                                                                                                                                                                          | Klinisk mikrobiologi                                                                                     | The Public Health Agency of Sweden                                                                      | Anna-Malin Linde, Maria Lind Karlberg, Carlo Berg, Oskar Karlsson Lindsjo, Sofia Stamouli, Reza Advani, Mattias Haukland, Petra Holmstrom, Noura Walai, Petra Edquist, Mia Brytting, Anna Risberg, Karin Tegmark-Wisell                           |
| EPI_ISL_1008402, EPI_ISL_1008403, EPI_ISL_1008404, EPI_ISL_1008405, EPI_ISL_1008406, EPI_ISL_1008407, EPI_ISL_1008409                                                                                                                                                                                                                                                                                                                                    | A05 Diagnostics                                                                                          | The Public Health Agency of Sweden                                                                      | Anna-Malin Linde, Maria Lind Karlberg, Carlo Berg, Oskar Karlsson Lindsjo, Sofia Stamouli, Reza Advani, Mattias Haukland, Petra Holmstrom, Noura Walai, Petra Edquist, Mia Brytting, Anna Risberg, Karin Tegmark-Wisell                           |
| EPI_ISL_1008413, EPI_ISL_1008439, EPI_ISL_1008443, EPI_ISL_1008445, EPI_ISL_1008447                                                                                                                                                                                                                                                                                                                                                                      | Klinisk mikrobiologi                                                                                     | The Public Health Agency of Sweden                                                                      | Anna-Malin Linde, Maria Lind Karlberg, Carlo Berg, Oskar Karlsson Lindsjo, Sofia Stamouli, Reza Advani, Mattias Haukland, Petra Holmstrom, Noura Walai, Petra Edquist, Mia Brytting, Anna Risberg, Karin Tegmark-Wisell                           |
| EPI_ISL_1008451, EPI_ISL_1008452, EPI_ISL_1008453, EPI_ISL_1008454                                                                                                                                                                                                                                                                                                                                                                                       | Synlab Medilab, Mikrobiologi                                                                             | The Public Health Agency of Sweden                                                                      | Anna-Malin Linde, Maria Lind Karlberg, Carlo Berg, Oskar Karlsson Lindsjo, Sofia Stamouli, Reza Advani, Mattias Haukland, Petra Holmstrom, Noura Walai, Petra Edquist, Mia Brytting, Anna Risberg, Karin Tegmark-Wisell                           |
| EPI_ISL_1008455, EPI_ISL_1008458                                                                                                                                                                                                                                                                                                                                                                                                                         | Klinisk mikrobiologi                                                                                     | The Public Health Agency of Sweden                                                                      | Anna-Malin Linde, Maria Lind Karlberg, Carlo Berg, Oskar Karlsson Lindsjo, Sofia Stamouli, Reza Advani, Mattias Haukland, Petra Holmstrom, Noura Walai, Petra Edquist, Mia Brytting, Anna Risberg, Karin Tegmark-Wisell                           |
| EPI_ISL_1008460, EPI_ISL_1008461, EPI_ISL_1008462, EPI_ISL_1008465, EPI_ISL_1008466, EPI_ISL_1008467, EPI_ISL_1008469, EPI_ISL_1008472, EPI_ISL_1008474                                                                                                                                                                                                                                                                                                  | Klinisk Mikrobiologi                                                                                     | The Public Health Agency of Sweden                                                                      | Anna-Malin Linde, Maria Lind Karlberg, Carlo Berg, Oskar Karlsson Lindsjo, Sofia Stamouli, Reza Advani, Mattias Haukland, Petra Holmstrom, Noura Walai, Petra Edquist, Mia Brytting, Anna Risberg, Karin Tegmark-Wisell                           |
| EPI_ISL_1008481, EPI_ISL_1008482, EPI_ISL_1008483, EPI_ISL_1008485, EPI_ISL_1008487, EPI_ISL_1008488, EPI_ISL_1008489                                                                                                                                                                                                                                                                                                                                    | Dynamic Code AB                                                                                          | The Public Health Agency of Sweden                                                                      | Anna-Malin Linde, Maria Lind Karlberg, Carlo Berg, Oskar Karlsson Lindsjo, Sofia Stamouli, Reza Advani, Mattias Haukland, Petra Holmstrom, Noura Walai, Petra Edquist, Mia Brytting, Anna Risberg, Karin Tegmark-Wisell                           |
| EPI_ISL_1008490, EPI_ISL_1008491, EPI_ISL_1008493, EPI_ISL_1008494, EPI_ISL_1008496, EPI_ISL_1008498, EPI_ISL_1008500, EPI_ISL_1008503, EPI_ISL_1008504, EPI_ISL_1008505, EPI_ISL_1008507, EPI_ISL_1008508, EPI_ISL_1008509, EPI_ISL_1008510, EPI_ISL_1008512, EPI_ISL_1008514, EPI_ISL_1008515, EPI_ISL_1008520, EPI_ISL_1008522, EPI_ISL_1008526, EPI_ISL_1008527, EPI_ISL_1008528, EPI_ISL_1008529, EPI_ISL_1008530, EPI_ISL_1008532, EPI_ISL_1008533 |                                                                                                          |                                                                                                         |                                                                                                                                                                                                                                                   |
| see above                                                                                                                                                                                                                                                                                                                                                                                                                                                | Klinisk mikrobiologi                                                                                     | The Public Health Agency of Sweden                                                                      | Anna-Malin Linde, Maria Lind Karlberg, Carlo Berg, Oskar Karlsson Lindsjo, Sofia Stamouli, Reza Advani, Mattias Haukland, Petra Holmstrom, Noura Walai, Petra Edquist, Mia Brytting, Anna Risberg, Karin Tegmark-Wisell                           |
| EPI_ISL_1008535, EPI_ISL_1008536, EPI_ISL_1008537, EPI_ISL_1008538, EPI_ISL_1008539                                                                                                                                                                                                                                                                                                                                                                      | A05 diagnostics                                                                                          | The Public Health Agency of Sweden                                                                      | Anna-Malin Linde, Maria Lind Karlberg, Carlo Berg, Oskar Karlsson Lindsjo, Sofia Stamouli, Reza Advani, Mattias Haukland, Petra Holmstrom, Noura Walai, Petra Edquist, Mia Brytting, Anna Risberg, Karin Tegmark-Wisell                           |
| EPI_ISL_1008540, EPI_ISL_1008551                                                                                                                                                                                                                                                                                                                                                                                                                         | Unilabs AB, Klinisk mikrobiologi                                                                         | The Public Health Agency of Sweden                                                                      | Anna-Malin Linde, Maria Lind Karlberg, Carlo Berg, Oskar Karlsson Lindsjo, Sofia Stamouli, Reza Advani, Mattias Haukland, Petra Holmstrom, Noura Walai, Petra Edquist, Mia Brytting, Anna Risberg, Karin Tegmark-Wisell                           |
| EPI_ISL_1008553, EPI_ISL_1008554, EPI_ISL_1008556, EPI_ISL_1008561, EPI_ISL_1008564, EPI_ISL_1008565, EPI_ISL_1008566, EPI_ISL_1008567, EPI_ISL_1008568, EPI_ISL_1008571, EPI_ISL_1008573, EPI_ISL_1008574, EPI_ISL_1008576, EPI_ISL_1008578, EPI_ISL_1008579, EPI_ISL_1008582, EPI_ISL_1008583, EPI_ISL_1008584, EPI_ISL_1008585                                                                                                                        |                                                                                                          |                                                                                                         |                                                                                                                                                                                                                                                   |
| see above                                                                                                                                                                                                                                                                                                                                                                                                                                                | Klinisk Mikrobiologi                                                                                     | The Public Health Agency of Sweden                                                                      | Anna-Malin Linde, Maria Lind Karlberg, Carlo Berg, Oskar Karlsson Lindsjo, Sofia Stamouli, Reza Advani, Mattias Haukland, Petra Holmstrom, Noura Walai, Petra Edquist, Mia Brytting, Anna Risberg, Karin Tegmark-Wisell                           |
| EPI_ISL_1008586                                                                                                                                                                                                                                                                                                                                                                                                                                          | ABC labs                                                                                                 | The Public Health Agency of Sweden                                                                      | Anna-Malin Linde, Maria Lind Karlberg, Carlo Berg, Oskar Karlsson Lindsjo, Sofia Stamouli, Reza Advani, Mattias Haukland, Petra Holmstrom, Noura Walai, Petra Edquist, Mia Brytting, Anna Risberg, Karin Tegmark-Wisell                           |
| EPI_ISL_1008591, EPI_ISL_1008593, EPI_ISL_1008595                                                                                                                                                                                                                                                                                                                                                                                                        | Klinisk mikrobiologi                                                                                     | The Public Health Agency of Sweden                                                                      | Anna-Malin Linde, Maria Lind Karlberg, Carlo Berg, Oskar Karlsson Lindsjo, Sofia Stamouli, Reza Advani, Mattias Haukland, Petra Holmstrom, Noura Walai, Petra Edquist, Mia Brytting, Anna Risberg, Karin Tegmark-Wisell                           |
| EPI_ISL_1008596                                                                                                                                                                                                                                                                                                                                                                                                                                          | Synlab Medilab, Mikrobiologi                                                                             | The Public Health Agency of Sweden                                                                      | Anna-Malin Linde, Maria Lind Karlberg, Carlo Berg, Oskar Karlsson Lindsjo, Sofia Stamouli, Reza Advani, Mattias Haukland, Petra Holmstrom, Noura Walai, Petra Edquist, Mia Brytting, Anna Risberg, Karin Tegmark-Wisell                           |
| EPI_ISL_1008597                                                                                                                                                                                                                                                                                                                                                                                                                                          | A23 Lab AB                                                                                               | The Public Health Agency of Sweden                                                                      | Anna-Malin Linde, Maria Lind Karlberg, Carlo Berg, Oskar Karlsson Lindsjo, Sofia Stamouli, Reza Advani, Mattias Haukland, Petra Holmstrom, Noura Walai, Petra Edquist, Mia Brytting, Anna Risberg, Karin Tegmark-Wisell                           |
| EPI_ISL_1008602                                                                                                                                                                                                                                                                                                                                                                                                                                          | Klinisk mikrobiologi                                                                                     | The Public Health Agency of Sweden                                                                      | Anna-Malin Linde, Maria Lind Karlberg, Carlo Berg, Oskar Karlsson Lindsjo, Sofia Stamouli, Reza Advani, Mattias Haukland, Petra Holmstrom, Noura                                                                                                  |

|                                                                                                                                                                                                                                                                                                                                                                                                                                                                                                                                                                                                                                                                                                                                                                            |                                                                                                                                                                                            |                                                                                                                        |                                                                                                                                                                                                                                                                                                                                                                                                                                                                    |
|----------------------------------------------------------------------------------------------------------------------------------------------------------------------------------------------------------------------------------------------------------------------------------------------------------------------------------------------------------------------------------------------------------------------------------------------------------------------------------------------------------------------------------------------------------------------------------------------------------------------------------------------------------------------------------------------------------------------------------------------------------------------------|--------------------------------------------------------------------------------------------------------------------------------------------------------------------------------------------|------------------------------------------------------------------------------------------------------------------------|--------------------------------------------------------------------------------------------------------------------------------------------------------------------------------------------------------------------------------------------------------------------------------------------------------------------------------------------------------------------------------------------------------------------------------------------------------------------|
|                                                                                                                                                                                                                                                                                                                                                                                                                                                                                                                                                                                                                                                                                                                                                                            |                                                                                                                                                                                            |                                                                                                                        | Walai, Petra Edquist, Mia Brytting, Anna Risberg, Karin Tegmark-Wisell                                                                                                                                                                                                                                                                                                                                                                                             |
| EPI_ISL_1008610                                                                                                                                                                                                                                                                                                                                                                                                                                                                                                                                                                                                                                                                                                                                                            | Ohio Department of Health Laboratory                                                                                                                                                       | Ohio Department of Health Laboratory                                                                                   | Holmes, Jennifer; Eric Brandt, Keoni Omura, Glen McGilivray, Caitlin McDonnell, Jade Mowery, Stephanie Mccracken, Tyler Payne, Kirtana Ramadugu, Erica Leasure, Brent Lee, Kelsey Florek, Heather Blankenship, Quanta Brown, and Tammy Bannerman                                                                                                                                                                                                                   |
| EPI_ISL_1008651                                                                                                                                                                                                                                                                                                                                                                                                                                                                                                                                                                                                                                                                                                                                                            | Ministry of Health Turkey                                                                                                                                                                  | Ministry of Health Turkey                                                                                              | Fatma Bayrakdar, Yasemin Cogun, Süleyman Yalcin, Aye Baak Alta, Gülay Korukluolu                                                                                                                                                                                                                                                                                                                                                                                   |
| EPI_ISL_1008664                                                                                                                                                                                                                                                                                                                                                                                                                                                                                                                                                                                                                                                                                                                                                            | Ospedale Santa Caterina Novella                                                                                                                                                            | Istituto Zooprofilattico Sperimentale della Puglia e della Basilicata                                                  | Parisi A., Bianco A., Capozzi L., Del Sambro L., Simone D., Chironna M., Loconsole D., Sallustio A., Ridolfi D.                                                                                                                                                                                                                                                                                                                                                    |
| EPI_ISL_1008678, EPI_ISL_1008703, EPI_ISL_1008704, EPI_ISL_1008705, EPI_ISL_1008708, EPI_ISL_1008711, EPI_ISL_1008712                                                                                                                                                                                                                                                                                                                                                                                                                                                                                                                                                                                                                                                      | Presidio di Brindisi Di Summa - Perrino                                                                                                                                                    | Istituto Zooprofilattico Sperimentale della Puglia e della Basilicata                                                  | Parisi A., Bianco A., Capozzi L., Del Sambro L., Simone D., Chironna M., Loconsole D., Sallustio A., Ridolfi D.                                                                                                                                                                                                                                                                                                                                                    |
| EPI_ISL_1008714                                                                                                                                                                                                                                                                                                                                                                                                                                                                                                                                                                                                                                                                                                                                                            | Unidad de Patología Clínica                                                                                                                                                                | Instituto de diagnóstico y Referencia Epidemiologicos (INDRE) Departamento de Virología                                | Claudia Wong-Arambula, Abril Rodríguez-Maldonado, Fabiola Garcés-Ayala, Natividad Cruz-Ortiz, Tatiana Nunez-Garcia, Gisela Barrera-Badillo, Lucia Hernandez-Rivas, Irma Lopez-Martinez, Ernesto Ramirez-Gonzalez.                                                                                                                                                                                                                                                  |
| EPI_ISL_1008715, EPI_ISL_1008716, EPI_ISL_1008717, EPI_ISL_1008718, EPI_ISL_1008719, EPI_ISL_1008720, EPI_ISL_1008721, EPI_ISL_1008722, EPI_ISL_1008723, EPI_ISL_1008724, EPI_ISL_1008725, EPI_ISL_1008726, EPI_ISL_1008727, EPI_ISL_1008728, EPI_ISL_1008729, EPI_ISL_1008730, EPI_ISL_1008731, EPI_ISL_1008732, EPI_ISL_1008733, EPI_ISL_1008734, EPI_ISL_1008736, EPI_ISL_1008737, EPI_ISL_1008738, EPI_ISL_1008739, EPI_ISL_1008740, EPI_ISL_1008741, EPI_ISL_1008742, EPI_ISL_1008743, EPI_ISL_1008744, EPI_ISL_1008745, EPI_ISL_1008746, EPI_ISL_1008747, EPI_ISL_1008748, EPI_ISL_1008749, EPI_ISL_1008750, EPI_ISL_1008752, EPI_ISL_1008753, EPI_ISL_1008754, EPI_ISL_1008755, EPI_ISL_1008756, EPI_ISL_1008757, EPI_ISL_1008758, EPI_ISL_1008759, EPI_ISL_1008760 |                                                                                                                                                                                            |                                                                                                                        |                                                                                                                                                                                                                                                                                                                                                                                                                                                                    |
| see above                                                                                                                                                                                                                                                                                                                                                                                                                                                                                                                                                                                                                                                                                                                                                                  | genXone SA, Molecular Diagnostics Laboratory / NZOZ                                                                                                                                        | genXone SA, Research & Development Laboratory                                                                          | Maciej Sykulski, Grzegorz Nowicki, Jakub Grabowski, Natalia Drwska-Matelska, Anna Brylak-Baszków, Aleksandra Gidlewicz, Karol Szeszko, ukasz Krych, Micha Kaszuba                                                                                                                                                                                                                                                                                                  |
| EPI_ISL_1008902                                                                                                                                                                                                                                                                                                                                                                                                                                                                                                                                                                                                                                                                                                                                                            | PA Department of Health, Bureau of Laboratories                                                                                                                                            | Pathogen Discovery, Respiratory Viruses Branch, Division of Viral Diseases, Centers for Disease Control and Prevention | Ying Tao, Jing Zhang, Yan Li, Krista Queen, Anna Uehara, Peter Cook, Clinton R. Paden, Haibin Wang, Suxiang Tong                                                                                                                                                                                                                                                                                                                                                   |
| EPI_ISL_1008915                                                                                                                                                                                                                                                                                                                                                                                                                                                                                                                                                                                                                                                                                                                                                            | GA Department of Public Health Laboratory                                                                                                                                                  | Pathogen Discovery, Respiratory Viruses Branch, Division of Viral Diseases, Centers for Disease Control and Prevention | Ying Tao, Jing Zhang, Yan Li, Krista Queen, Anna Uehara, Peter Cook, Clinton R. Paden, Haibin Wang, Suxiang Tong                                                                                                                                                                                                                                                                                                                                                   |
| EPI_ISL_1008924                                                                                                                                                                                                                                                                                                                                                                                                                                                                                                                                                                                                                                                                                                                                                            | IN State Department of Health Laboratory Services                                                                                                                                          | Pathogen Discovery, Respiratory Viruses Branch, Division of Viral Diseases, Centers for Disease Control and Prevention | Ying Tao, Jing Zhang, Yan Li, Krista Queen, Anna Uehara, Peter Cook, Clinton R. Paden, Haibin Wang, Suxiang Tong                                                                                                                                                                                                                                                                                                                                                   |
| EPI_ISL_1008930                                                                                                                                                                                                                                                                                                                                                                                                                                                                                                                                                                                                                                                                                                                                                            | Servicio de Microbiología. Hospital Ramón y Cajal. (CIBERESP)                                                                                                                              | SeqCOVID-SPAIN consortium/IBV(CSIC)                                                                                    | Jose Mª González-Alba, L. Olavarrieta, Val Fernández, Juan C Galán and SeqCOVID-SPAIN consortium                                                                                                                                                                                                                                                                                                                                                                   |
| EPI_ISL_1008949, EPI_ISL_1008950, EPI_ISL_1008953, EPI_ISL_1008954, EPI_ISL_1008955, EPI_ISL_1008956, EPI_ISL_1008957, EPI_ISL_1008964, EPI_ISL_1008965, EPI_ISL_1008966, EPI_ISL_1008967, EPI_ISL_1008969, EPI_ISL_1008970, EPI_ISL_1008971, EPI_ISL_1008972, EPI_ISL_1008975, EPI_ISL_1008978, EPI_ISL_1008979, EPI_ISL_1008980                                                                                                                                                                                                                                                                                                                                                                                                                                          |                                                                                                                                                                                            |                                                                                                                        |                                                                                                                                                                                                                                                                                                                                                                                                                                                                    |
| see above                                                                                                                                                                                                                                                                                                                                                                                                                                                                                                                                                                                                                                                                                                                                                                  | Servicio de Microbiología, Laboratori Clínic Metropolitana Nord. Hospital Universitari Germans Trias i Pujol. Institut d'Investigació en Ciències de la Salut Germans Trias i Pujol (IGTP) | SeqCOVID-SPAIN consortium/IBV(CSIC)                                                                                    | Elisa Martró, Antoni E. Bordoy, Anna Not, Adrián Antuori, Anabel Fernández, Nona Romaní, Verónica Saludes, Cristina Casañ and SeqCOVID-SPAIN consortium                                                                                                                                                                                                                                                                                                            |
| EPI_ISL_1008984, EPI_ISL_1008986, EPI_ISL_1008987, EPI_ISL_1008990, EPI_ISL_1008991, EPI_ISL_1008992, EPI_ISL_1008993, EPI_ISL_1008994, EPI_ISL_1008999, EPI_ISL_1009000, EPI_ISL_1009006, EPI_ISL_1009008                                                                                                                                                                                                                                                                                                                                                                                                                                                                                                                                                                 |                                                                                                                                                                                            |                                                                                                                        |                                                                                                                                                                                                                                                                                                                                                                                                                                                                    |
| see above                                                                                                                                                                                                                                                                                                                                                                                                                                                                                                                                                                                                                                                                                                                                                                  | Hospital Universitario Marqués de Valdeclilla - IDIVAL (Santander, Cantabria)                                                                                                              | SeqCOVID-SPAIN consortium/IBV(CSIC)                                                                                    | Mónica Gozalo Margüello, María Eleicer Cano García, Jose Manuel Méndez Legaza, Daniel Pablo Marcos, Jesús Rodríguez Rodríguez, María Siller Ruiz and SeqCOVID-SPAIN consortium                                                                                                                                                                                                                                                                                     |
| EPI_ISL_1009019                                                                                                                                                                                                                                                                                                                                                                                                                                                                                                                                                                                                                                                                                                                                                            | Azienda Ospedaliera San Camillo Forlanini                                                                                                                                                  | INMI Lazzaro Spallanzani IRCCS                                                                                         | E Giombini, M. Rueca, B Bartolini, O Butera, C.E.M Gruber, F Messina, G Parisi, M Irno Consalvo, A Di Caro, MR Capobianchi                                                                                                                                                                                                                                                                                                                                         |
| EPI_ISL_1009024                                                                                                                                                                                                                                                                                                                                                                                                                                                                                                                                                                                                                                                                                                                                                            | Fondazione Policlinico Universitario "A. Gemelli" IRCCS                                                                                                                                    | INMI Lazzaro Spallanzani IRCCS                                                                                         | E Giombini, M. Rueca, B Bartolini, O Butera, C.E.M Gruber, F Messina, P Cattani,M Sanguinetti, A Di Caro, MR Capobianchi                                                                                                                                                                                                                                                                                                                                           |
| EPI_ISL_1009025                                                                                                                                                                                                                                                                                                                                                                                                                                                                                                                                                                                                                                                                                                                                                            | Fondazione Policlinico Universitario "A. Gemelli" IRCCS                                                                                                                                    | INMI Lazzaro Spallanzani IRCCS                                                                                         | B Bartolini, O Butera, C.E.M Gruber, M Rueca, F Messina, E Giombini, P Cattani,M Sanguinetti, MR Capobianchi, A Di Caro                                                                                                                                                                                                                                                                                                                                            |
| EPI_ISL_1009029                                                                                                                                                                                                                                                                                                                                                                                                                                                                                                                                                                                                                                                                                                                                                            | AOU Policlinico Umberto I; Sapienza Università di Roma                                                                                                                                     | INMI Lazzaro Spallanzani IRCCS                                                                                         | B Bartolini, O Butera, C.E.M Gruber, M Rueca, F Messina, E Giombini, G Antonelli, O Turriziani, MR Capobianchi, A Di Caro                                                                                                                                                                                                                                                                                                                                          |
| EPI_ISL_1009032, EPI_ISL_1009034, EPI_ISL_1009037, EPI_ISL_1009040, EPI_ISL_1009053, EPI_ISL_1009055, EPI_ISL_1009060, EPI_ISL_1009062, EPI_ISL_1009065                                                                                                                                                                                                                                                                                                                                                                                                                                                                                                                                                                                                                    | Servicio de Microbiología. Hospital Ramón y Cajal. (CIBERESP)                                                                                                                              | SeqCOVID-SPAIN consortium/IBV(CSIC)                                                                                    | Jose Mª González-Alba, L. Olavarrieta, Val Fernández, Juan C Galán and SeqCOVID-SPAIN consortium                                                                                                                                                                                                                                                                                                                                                                   |
| EPI_ISL_1009071, EPI_ISL_1009072, EPI_ISL_1009073, EPI_ISL_1009074, EPI_ISL_1009078, EPI_ISL_1009079, EPI_ISL_1009081, EPI_ISL_1009083, EPI_ISL_1009086, EPI_ISL_1009090, EPI_ISL_1009091, EPI_ISL_1009092, EPI_ISL_1009095, EPI_ISL_1009098, EPI_ISL_1009100, EPI_ISL_1009103, EPI_ISL_1009104, EPI_ISL_1009112, EPI_ISL_1009113, EPI_ISL_1009115, EPI_ISL_1009118, EPI_ISL_1009119, EPI_ISL_1009120, EPI_ISL_1009121                                                                                                                                                                                                                                                                                                                                                     |                                                                                                                                                                                            |                                                                                                                        |                                                                                                                                                                                                                                                                                                                                                                                                                                                                    |
| see above                                                                                                                                                                                                                                                                                                                                                                                                                                                                                                                                                                                                                                                                                                                                                                  | Servicio de Microbiología Clínica (Complejo Hospitalario de Navarra, Pamplona), Instituto de Investigación Sanitaria de Navarra (IdiSNA)                                                   | SeqCOVID-SPAIN consortium/IBV(CSIC)                                                                                    | Carmen Ezpeleta Baquedano, Ana Navascués, Ana Miqueleiz and SeqCOVID-SPAIN consortium                                                                                                                                                                                                                                                                                                                                                                              |
| EPI_ISL_1009208                                                                                                                                                                                                                                                                                                                                                                                                                                                                                                                                                                                                                                                                                                                                                            | American Esoteric Laboratories                                                                                                                                                             | Colleen B. Jonsson                                                                                                     | Mariah K. Taylor, Walter Reichard, Jyothi Parvathareddy, Colleen B. Jonsson                                                                                                                                                                                                                                                                                                                                                                                        |
| EPI_ISL_1009618                                                                                                                                                                                                                                                                                                                                                                                                                                                                                                                                                                                                                                                                                                                                                            | Cerballiance Cerrieres-le-Buisson                                                                                                                                                          | Cerba                                                                                                                  | Collin T, Lesenne A, Olivi M, Ricard B, Benazra M, Delaplace E, Gresset N, Haim-Boukobza S, Trombert-Paolantoni S, Lecorche E, Roquebert B                                                                                                                                                                                                                                                                                                                         |
| EPI_ISL_1009633, EPI_ISL_1009635, EPI_ISL_1009639, EPI_ISL_1009642, EPI_ISL_1009646, EPI_ISL_1009652                                                                                                                                                                                                                                                                                                                                                                                                                                                                                                                                                                                                                                                                       | DPHL                                                                                                                                                                                       | Delaware Public Health Lab                                                                                             | Gregory Hovan                                                                                                                                                                                                                                                                                                                                                                                                                                                      |
| EPI_ISL_1009667                                                                                                                                                                                                                                                                                                                                                                                                                                                                                                                                                                                                                                                                                                                                                            | Cerballiance Bourg-la-Reine                                                                                                                                                                | Cerba                                                                                                                  | Collin T, Lesenne A, Olivi M, Ricard B, Benazra M, Delaplace E, Gresset N, Haim-Boukobza S, Trombert-Paolantoni S, Lecorche E, Roquebert B                                                                                                                                                                                                                                                                                                                         |
| EPI_ISL_1009674                                                                                                                                                                                                                                                                                                                                                                                                                                                                                                                                                                                                                                                                                                                                                            | Cerballiance Wilson                                                                                                                                                                        | Cerba                                                                                                                  | Haïm-Boukobza S, Merah K, Olivi M, Benazra M, Trombert-Paolantoni S, Lecorche E, Roquebert B                                                                                                                                                                                                                                                                                                                                                                       |
| EPI_ISL_1010699, EPI_ISL_1010700, EPI_ISL_1010701, EPI_ISL_1010702, EPI_ISL_1010703                                                                                                                                                                                                                                                                                                                                                                                                                                                                                                                                                                                                                                                                                        | New South Wales Health Pathology Royal Prince Alfred Hospital                                                                                                                              | Microbiology RPAH                                                                                                      | Foster, C.; Au, J.; Ruiz Silva, M.; Deveson, I.; Bull, R.; Van Hal, S.; Rawlinson, W.                                                                                                                                                                                                                                                                                                                                                                              |
| EPI_ISL_1010705                                                                                                                                                                                                                                                                                                                                                                                                                                                                                                                                                                                                                                                                                                                                                            | Area of Virology, Serology and Virology Division (SAVID), New South Wales Health Pathology Randwick                                                                                        | Microbiology RPAH                                                                                                      | Foster, C.; Au, J.; Ruiz Silva, M.; Deveson, I.; Bull, R.; Van Hal, S.; Rawlinson, W.                                                                                                                                                                                                                                                                                                                                                                              |
| EPI_ISL_1010729, EPI_ISL_1010730                                                                                                                                                                                                                                                                                                                                                                                                                                                                                                                                                                                                                                                                                                                                           | Department of Laboratory Medicine, National Taiwan University Hospital                                                                                                                     | Microbial Genomics Core Lab, National Taiwan University Centers of Genomic and Precision Medicine                      | Shiou-Hwei Yeh, You-Yu Lin, Ya-Yun Lai, Chiao-Ling Li, Shan-Chwen Chang, Pei-Jer Chen, Sui-Yuan Chang                                                                                                                                                                                                                                                                                                                                                              |
| EPI_ISL_1011544, EPI_ISL_1011561, EPI_ISL_1011576                                                                                                                                                                                                                                                                                                                                                                                                                                                                                                                                                                                                                                                                                                                          | Massachusetts General Hospital                                                                                                                                                             | Infectious Disease Program, Broad Institute of Harvard and MIT                                                         | Lemieux,J.E., Siddle,K.J., Shaw,B., Adams,G., Pierce,V., Turbett,S., Anahtar,M., Branda,J., Slater,D., Harris,J., Lin,A.E., Gladden-Young,A., Lagerborg,K., Rudy,M., DeRuff,K., Carter,A., Normandin,E., Bauer,M., Reilly,S., Tomkins-Tinch,C., Loreth,C., Chaluvadi,S., Neumann,A., Cusick,C., Chapman,S.B., Gnirke,A., Flowers,K., Cerrato,F., Birren,B.W., Gallagher,G., Smole,S., Park,D.J., MacInnis,B.L., Ryan,E., LaRocque,R., Rosenberg,E. and Sabeti,P.C. |
| EPI_ISL_1011602, EPI_ISL_1011608, EPI_ISL_1011609, EPI_ISL_1011610, EPI_ISL_1011618, EPI_ISL_1011623, EPI_ISL_1011667                                                                                                                                                                                                                                                                                                                                                                                                                                                                                                                                                                                                                                                      | Warrior Diagnostics Laboratory                                                                                                                                                             | Infectious Disease Program, Broad Institute of Harvard and MIT                                                         | Lemieux,J.E., Siddle,K.J., Marshall,J., O'Neill,M., Bronson,A., Adams,G., Gladden-Young,A., Lagerborg,K., Rudy,M., DeRuff,K., Carter,A., Normandin,E., Bauer,M., Reilly,S., Tomkins-Tinch,C., Loreth,C., Chaluvadi,S., Birren,B.W., Gallagher,G., Smole,S., Park,D.J., MacInnis,B.L., and Sabeti,P.C.                                                                                                                                                              |
| EPI_ISL_1011681, EPI_ISL_1011682, EPI_ISL_1011683, EPI_ISL_1011684, EPI_ISL_1011686, EPI_ISL_1011687, EPI_ISL_1011688, EPI_ISL_1011691, EPI_ISL_1011693, EPI_ISL_1011694, EPI_ISL_1011695, EPI_ISL_1011696, EPI_ISL_1011699, EPI_ISL_1011701, EPI_ISL_1011702                                                                                                                                                                                                                                                                                                                                                                                                                                                                                                              |                                                                                                                                                                                            |                                                                                                                        |                                                                                                                                                                                                                                                                                                                                                                                                                                                                    |
| see above                                                                                                                                                                                                                                                                                                                                                                                                                                                                                                                                                                                                                                                                                                                                                                  | Broad Institute Clinical Research Sequencing Platform                                                                                                                                      | Infectious Disease Program, Broad Institute of Harvard and                                                             | Lemieux,J.E., Siddle,K.J., Adams,G., Gladden-Young,A., Lagerborg,K., Rudy,M., DeRuff,K., Carter,A., Normandin,E., Bauer,M., Reilly,S.,                                                                                                                                                                                                                                                                                                                             |

|                                                                                                                                                                                                                                                                                                                                                                                                                                                                                                                                                                                                                                                                                                                                                                                                                                                                                                                                                      |                                                                                                                                                                                            |                                                                                                                         |                                                                                                                                                                                                                                                                                                            |
|------------------------------------------------------------------------------------------------------------------------------------------------------------------------------------------------------------------------------------------------------------------------------------------------------------------------------------------------------------------------------------------------------------------------------------------------------------------------------------------------------------------------------------------------------------------------------------------------------------------------------------------------------------------------------------------------------------------------------------------------------------------------------------------------------------------------------------------------------------------------------------------------------------------------------------------------------|--------------------------------------------------------------------------------------------------------------------------------------------------------------------------------------------|-------------------------------------------------------------------------------------------------------------------------|------------------------------------------------------------------------------------------------------------------------------------------------------------------------------------------------------------------------------------------------------------------------------------------------------------|
|                                                                                                                                                                                                                                                                                                                                                                                                                                                                                                                                                                                                                                                                                                                                                                                                                                                                                                                                                      |                                                                                                                                                                                            | MIT                                                                                                                     | Tomkins-Tinch,C., Loreth,C., Chaluvadi,S., Birren,B.W., Gallagher,G., Smole,S., Park,D.J., MacInnis,B.L., and Sabeti,P.C.                                                                                                                                                                                  |
| EPI_ISL_1011719, EPI_ISL_1011724, EPI_ISL_1011725, EPI_ISL_1011726, EPI_ISL_1011734, EPI_ISL_1011749, EPI_ISL_1011750                                                                                                                                                                                                                                                                                                                                                                                                                                                                                                                                                                                                                                                                                                                                                                                                                                | Rhode Island Department of Health                                                                                                                                                          | Infectious Disease Program, Broad Institute of Harvard and MIT                                                          | Lemieux,J.E., Siddle,K.J., Huard,R., King,E., Azevedo,K., Miller,A., Adams,G., Gladden-Young,A., Lagerborg,K., Rudy,M., DeRuff,K., Carter,A., Normandin,E., Bauer,M., Reilly,S., Tomkins-Tinch,C., Loreth,C., Chaluvadi,S., Birren,B.W., Gallagher,G., Smole,S., Park,D.J., MacInnis,B.L., and Sabeti,P.C. |
| EPI_ISL_1011752                                                                                                                                                                                                                                                                                                                                                                                                                                                                                                                                                                                                                                                                                                                                                                                                                                                                                                                                      | Cerballiance Grigny                                                                                                                                                                        | Cerba                                                                                                                   | Collin T, Lesenne A, Olivi M, Ricard B, Benazra M, Delaplace E, Gresset N, Haim-Boukobza S, Trombert-Paolantoni S, Lecorche E, Roquebert B                                                                                                                                                                 |
| EPI_ISL_1011754                                                                                                                                                                                                                                                                                                                                                                                                                                                                                                                                                                                                                                                                                                                                                                                                                                                                                                                                      | General Hospital - Veles                                                                                                                                                                   | Research Center for Genetic Engineering and Biotechnology "Georgi D. Efremov" , Macedonian Academy of Sciences and Arts | Aleksandar J. Dimovski, Dijana Plasheska-Karanfilska, Predrag Noveski, Gjorgji Bozinovski, Milena Jakimovska                                                                                                                                                                                               |
| EPI_ISL_1011755                                                                                                                                                                                                                                                                                                                                                                                                                                                                                                                                                                                                                                                                                                                                                                                                                                                                                                                                      | General Hospital - Bitola                                                                                                                                                                  | Research Center for Genetic Engineering and Biotechnology "Georgi D. Efremov" , Macedonian Academy of Sciences and Arts | Aleksandar J. Dimovski, Dijana Plasheska-Karanfilska, Predrag Noveski, Gjorgji Bozinovski, Milena Jakimovska                                                                                                                                                                                               |
| EPI_ISL_1012376, EPI_ISL_1012388                                                                                                                                                                                                                                                                                                                                                                                                                                                                                                                                                                                                                                                                                                                                                                                                                                                                                                                     | Lighthouse Lab in Cambridge                                                                                                                                                                | Wellcome Sanger Institute for the COVID-19 Genomics UK (COG-UK) Consortium                                              | Rob Howes, The Lighthouse Lab in Cambridge and Alex Alderton, Roberto Amato, Sonia Goncalves, Ewan Harrison, David K. Jackson, Ian Johnston, Dominic Kwiatkowski, Cordelia Langford, John Sillitoe on behalf of the Wellcome Sanger Institute COVID-19 Surveillance Team                                   |
| EPI_ISL_1012403, EPI_ISL_1012608                                                                                                                                                                                                                                                                                                                                                                                                                                                                                                                                                                                                                                                                                                                                                                                                                                                                                                                     | Lighthouse Lab in Milton Keynes                                                                                                                                                            | Wellcome Sanger Institute for the COVID-19 Genomics UK (COG-UK) Consortium                                              | The Lighthouse Lab in Milton Keynes and Alex Alderton, Roberto Amato, Sonia Goncalves, Ewan Harrison, David K. Jackson, Ian Johnston, Dominic Kwiatkowski, Cordelia Langford, John Sillitoe on behalf of the Wellcome Sanger Institute COVID-19 Surveillance Team                                          |
| EPI_ISL_1012629                                                                                                                                                                                                                                                                                                                                                                                                                                                                                                                                                                                                                                                                                                                                                                                                                                                                                                                                      | Lighthouse Lab in Cambridge                                                                                                                                                                | Wellcome Sanger Institute for the COVID-19 Genomics UK (COG-UK) Consortium                                              | Rob Howes, The Lighthouse Lab in Cambridge and Alex Alderton, Roberto Amato, Sonia Goncalves, Ewan Harrison, David K. Jackson, Ian Johnston, Dominic Kwiatkowski, Cordelia Langford, John Sillitoe on behalf of the Wellcome Sanger Institute COVID-19 Surveillance Team                                   |
| EPI_ISL_1012695, EPI_ISL_1012697, EPI_ISL_1012703, EPI_ISL_1012705, EPI_ISL_1012709, EPI_ISL_1012710, EPI_ISL_1012712, EPI_ISL_1012713, EPI_ISL_1012714, EPI_ISL_1012715, EPI_ISL_1012716, EPI_ISL_1012718, EPI_ISL_1012719, EPI_ISL_1012723, EPI_ISL_1012727, EPI_ISL_1012729, EPI_ISL_1012732, EPI_ISL_1012733, EPI_ISL_1012736, EPI_ISL_1012738, EPI_ISL_1012739, EPI_ISL_1012741, EPI_ISL_1012742, EPI_ISL_1012743, EPI_ISL_1012745, EPI_ISL_1012746, EPI_ISL_1012754, EPI_ISL_1012759, EPI_ISL_1012761, EPI_ISL_1012765, EPI_ISL_1012767, EPI_ISL_1012768, EPI_ISL_1012787, EPI_ISL_1012789, EPI_ISL_1012791, EPI_ISL_1012798, EPI_ISL_1012799, EPI_ISL_1012804, EPI_ISL_1012807, EPI_ISL_1012811, EPI_ISL_1012812, EPI_ISL_1012825, EPI_ISL_1012827, EPI_ISL_1012828, EPI_ISL_1012835, EPI_ISL_1012839, EPI_ISL_1012840, EPI_ISL_1012844, EPI_ISL_1012845, EPI_ISL_1012851, EPI_ISL_1012852, EPI_ISL_1012853, EPI_ISL_1012857, EPI_ISL_1012860 |                                                                                                                                                                                            |                                                                                                                         |                                                                                                                                                                                                                                                                                                            |
| see above                                                                                                                                                                                                                                                                                                                                                                                                                                                                                                                                                                                                                                                                                                                                                                                                                                                                                                                                            | Lighthouse Lab in Alderley Park                                                                                                                                                            | Wellcome Sanger Institute for the COVID-19 Genomics UK (COG-UK) Consortium                                              | Jacquelyn Wynn, Mairead Hyland, The Lighthouse Lab in Alderley Park and Alex Alderton, Roberto Amato, Sonia Goncalves, Ewan Harrison, David K. Jackson, Ian Johnston, Dominic Kwiatkowski, Cordelia Langford, John Sillitoe on behalf of the Wellcome Sanger Institute COVID-19 Surveillance Team          |
| EPI_ISL_1012862                                                                                                                                                                                                                                                                                                                                                                                                                                                                                                                                                                                                                                                                                                                                                                                                                                                                                                                                      | Lighthouse Lab in Milton Keynes                                                                                                                                                            | Wellcome Sanger Institute for the COVID-19 Genomics UK (COG-UK) Consortium                                              | The Lighthouse Lab in Milton Keynes and Alex Alderton, Roberto Amato, Sonia Goncalves, Ewan Harrison, David K. Jackson, Ian Johnston, Dominic Kwiatkowski, Cordelia Langford, John Sillitoe on behalf of the Wellcome Sanger Institute COVID-19 Surveillance Team                                          |
| EPI_ISL_1012863, EPI_ISL_1012868, EPI_ISL_1012869                                                                                                                                                                                                                                                                                                                                                                                                                                                                                                                                                                                                                                                                                                                                                                                                                                                                                                    | Lighthouse Lab in Alderley Park                                                                                                                                                            | Wellcome Sanger Institute for the COVID-19 Genomics UK (COG-UK) Consortium                                              | Jacquelyn Wynn, Mairead Hyland, The Lighthouse Lab in Alderley Park and Alex Alderton, Roberto Amato, Sonia Goncalves, Ewan Harrison, David K. Jackson, Ian Johnston, Dominic Kwiatkowski, Cordelia Langford, John Sillitoe on behalf of the Wellcome Sanger Institute COVID-19 Surveillance Team          |
| EPI_ISL_1012900                                                                                                                                                                                                                                                                                                                                                                                                                                                                                                                                                                                                                                                                                                                                                                                                                                                                                                                                      | New Mexico Department of Health Scientific Laboratory                                                                                                                                      | New Mexico Department of Health Scientific Laboratory                                                                   | Elie Johnson, Anastacia Griego-Fisher, D'eldra Malone, Jennifer Benoit                                                                                                                                                                                                                                     |
| EPI_ISL_1012925                                                                                                                                                                                                                                                                                                                                                                                                                                                                                                                                                                                                                                                                                                                                                                                                                                                                                                                                      | Hospital Universitari Germans Trias i Pujol(HUGTiP)/Fundació Lluita contra la SIDA (FLSida)                                                                                                | IrsiCaixa - Can Ruti CovidSeq                                                                                           | Marc Noguera-Julian, Mariona Parera, Maria Casadellà, Pilar Armengol, Francesc Catala-Moll, Roger Paredes, Bonaventura Clotet Marta Massanella, Ester Ballana, Lidia Ruiz, Nuria Izquierdo, Jorge Carrillo, Roger Paredes, Julia Blanco, Joaquim Segalés, Bonaventura Clotet                               |
| EPI_ISL_1012929, EPI_ISL_1012930, EPI_ISL_1012931, EPI_ISL_1012951, EPI_ISL_1012952, EPI_ISL_1012959, EPI_ISL_1012960, EPI_ISL_1012962, EPI_ISL_1012972, EPI_ISL_1012988, EPI_ISL_1012989, EPI_ISL_1012990, EPI_ISL_1012999, EPI_ISL_1013007, EPI_ISL_1013008, EPI_ISL_1013010, EPI_ISL_1013016, EPI_ISL_1013021, EPI_ISL_1013023, EPI_ISL_1013030, EPI_ISL_1013032, EPI_ISL_1013036, EPI_ISL_1013037, EPI_ISL_1013039, EPI_ISL_1013048, EPI_ISL_1013051, EPI_ISL_1013053, EPI_ISL_1013054, EPI_ISL_1013056, EPI_ISL_1013063, EPI_ISL_1013071, EPI_ISL_1013076, EPI_ISL_1013080, EPI_ISL_1013087                                                                                                                                                                                                                                                                                                                                                     |                                                                                                                                                                                            |                                                                                                                         |                                                                                                                                                                                                                                                                                                            |
| see above                                                                                                                                                                                                                                                                                                                                                                                                                                                                                                                                                                                                                                                                                                                                                                                                                                                                                                                                            | Servicio de Microbiología. Laboratori Clínic Metropolitana Nord. Hospital Universitari Germans Trias i Pujol. Institut d'Investigació en Ciències de la Salut Germans Trias i Pujol (IGTP) | IrsiCaixa - Can Ruti CovidSeq                                                                                           | Marc Noguera-Julian, Mariona Parera, Maria Casadellà, Pilar Armengol, Francesc Catala-Moll, Roger Paredes, Bonaventura Clotet Elisa Martró, Verónica Saludes, Anna Not, Ana Pérez, Montserrat Giménez, Ignacio Blanco, Cristina Esteban, Cristina Casañ, Antoni E. Bordoy, Adrián Antuori                  |
| EPI_ISL_1013097                                                                                                                                                                                                                                                                                                                                                                                                                                                                                                                                                                                                                                                                                                                                                                                                                                                                                                                                      | General Hospital - Veles                                                                                                                                                                   | Research Center for Genetic Engineering and Biotechnology "Georgi D. Efremov" , Macedonian Academy of Sciences and Arts | Aleksandar J. Dimovski, Dijana Plasheska-Karanfilska, Predrag Noveski, Gjorgji Bozinovski, Milena Jakimovska                                                                                                                                                                                               |
| EPI_ISL_1013098                                                                                                                                                                                                                                                                                                                                                                                                                                                                                                                                                                                                                                                                                                                                                                                                                                                                                                                                      | General Hospital - Kumanovo                                                                                                                                                                | Research Center for Genetic Engineering and Biotechnology "Georgi D. Efremov" , Macedonian Academy of Sciences and Arts | Aleksandar J. Dimovski, Dijana Plasheska-Karanfilska, Predrag Noveski, Gjorgji Bozinovski, Milena Jakimovska                                                                                                                                                                                               |
| EPI_ISL_1013099, EPI_ISL_1013100, EPI_ISL_1013101, EPI_ISL_1013104, EPI_ISL_1013105, EPI_ISL_1013106, EPI_ISL_1013109, EPI_ISL_1013110, EPI_ISL_1013115, EPI_ISL_1013118, EPI_ISL_1013119, EPI_ISL_1013120, EPI_ISL_1013123, EPI_ISL_1013126, EPI_ISL_1013134, EPI_ISL_1013139, EPI_ISL_1013140, EPI_ISL_1013141, EPI_ISL_1013142, EPI_ISL_1013143, EPI_ISL_1013144, EPI_ISL_1013145, EPI_ISL_1013152, EPI_ISL_1013157, EPI_ISL_1013158, EPI_ISL_1013163, EPI_ISL_1013165, EPI_ISL_1013166, EPI_ISL_1013168, EPI_ISL_1013169, EPI_ISL_1013171, EPI_ISL_1013174, EPI_ISL_1013176, EPI_ISL_1013178, EPI_ISL_1013179, EPI_ISL_1013180, EPI_ISL_1013181, EPI_ISL_1013205, EPI_ISL_1013206, EPI_ISL_1013208                                                                                                                                                                                                                                               |                                                                                                                                                                                            |                                                                                                                         |                                                                                                                                                                                                                                                                                                            |
| see above                                                                                                                                                                                                                                                                                                                                                                                                                                                                                                                                                                                                                                                                                                                                                                                                                                                                                                                                            | CH de Mayotte                                                                                                                                                                              | National Reference Center for Viruses of Respiratory Infections, Institut Pasteur, Paris                                | Marion Barbet, Sylvie Behillil, Méline Bizard, Angela Brisebarre, Camille Capel, Etienne Simon-Lorière, Vincent Enouf, Maud Vanpeene, Sylvie van der Werf,Combe Patrice                                                                                                                                    |
| EPI_ISL_1013215, EPI_ISL_1013216                                                                                                                                                                                                                                                                                                                                                                                                                                                                                                                                                                                                                                                                                                                                                                                                                                                                                                                     | Institut Pasteur de Guadeloupe                                                                                                                                                             | National Reference Center for Viruses of Respiratory Infections, Institut Pasteur, Paris                                | Marion Barbet, Sylvie Behillil, Méline Bizard, Angela Brisebarre, Camille Capel, Etienne Simon-Lorière, Vincent Enouf, Maud Vanpeene, Sylvie van der Werf,Talarmin Antoine                                                                                                                                 |
| EPI_ISL_1013217                                                                                                                                                                                                                                                                                                                                                                                                                                                                                                                                                                                                                                                                                                                                                                                                                                                                                                                                      | Laboratoire de Microbiologie                                                                                                                                                               | National Reference Center for Viruses of Respiratory Infections, Institut Pasteur, Paris                                | Marion Barbet, Sylvie Behillil, Méline Bizard, Angela Brisebarre, Camille Capel, Etienne Simon-Lorière, Vincent Enouf, Maud Vanpeene, Sylvie van der Werf,Martres Pascale                                                                                                                                  |
| EPI_ISL_1013227, EPI_ISL_1013234                                                                                                                                                                                                                                                                                                                                                                                                                                                                                                                                                                                                                                                                                                                                                                                                                                                                                                                     | CH de Mayotte                                                                                                                                                                              | National Reference Center for Viruses of Respiratory Infections, Institut Pasteur, Paris                                | Marion Barbet, Sylvie Behillil, Méline Bizard, Angela Brisebarre, Camille Capel, Etienne Simon-Lorière, Vincent Enouf, Maud Vanpeene, Sylvie van der Werf,Combe Patrice                                                                                                                                    |
| EPI_ISL_1013236                                                                                                                                                                                                                                                                                                                                                                                                                                                                                                                                                                                                                                                                                                                                                                                                                                                                                                                                      | Institut Pasteur de Guadeloupe                                                                                                                                                             | National Reference Center for Viruses of Respiratory Infections, Institut Pasteur, Paris                                | Marion Barbet, Sylvie Behillil, Méline Bizard, Angela Brisebarre, Camille Capel, Etienne Simon-Lorière, Vincent Enouf, Maud Vanpeene, Sylvie van der Werf,Talarmin Antoine                                                                                                                                 |
| EPI_ISL_1013239, EPI_ISL_1013252, EPI_ISL_1013269, EPI_ISL_1013274, EPI_ISL_1013285, EPI_ISL_1013300, EPI_ISL_1013302, EPI_ISL_1013304, EPI_ISL_1013311, EPI_ISL_1013322, EPI_ISL_1013328, EPI_ISL_1013330, EPI_ISL_1013355, EPI_ISL_1013362, EPI_ISL_1013365, EPI_ISL_1013366, EPI_ISL_1013367, EPI_ISL_1013368, EPI_ISL_1013369, EPI_ISL_1013370, EPI_ISL_1013371, EPI_ISL_1013372, EPI_ISL_1013373, EPI_ISL_1013374, EPI_ISL_1013375, EPI_ISL_1013376, EPI_ISL_1013377, EPI_ISL_1013378, EPI_ISL_1013380, EPI_ISL_1013381, EPI_ISL_1013382, EPI_ISL_1013383, EPI_ISL_1013384, EPI_ISL_1013385, EPI_ISL_1013386, EPI_ISL_1013387, EPI_ISL_1013388, EPI_ISL_1013389, EPI_ISL_1013390, EPI_ISL_1013392, EPI_ISL_1013393, EPI_ISL_1013394, EPI_ISL_1013395, EPI_ISL_1013396, EPI_ISL_1013397, EPI_ISL_1013398, EPI_ISL_1013400, EPI_ISL_1013401, EPI_ISL_1013402, EPI_ISL_1013403, EPI_ISL_1013404, EPI_ISL_1013405, EPI_ISL_1013407                  |                                                                                                                                                                                            |                                                                                                                         |                                                                                                                                                                                                                                                                                                            |
| see above                                                                                                                                                                                                                                                                                                                                                                                                                                                                                                                                                                                                                                                                                                                                                                                                                                                                                                                                            | CH de Mayotte                                                                                                                                                                              | National Reference Center for Viruses of Respiratory Infections, Institut Pasteur, Paris                                | Marion Barbet, Sylvie Behillil, Méline Bizard, Angela Brisebarre, Camille Capel, Etienne Simon-Lorière, Vincent Enouf, Maud Vanpeene, Sylvie van der Werf,Combe Patrice                                                                                                                                    |
| EPI_ISL_1013408, EPI_ISL_1013409, EPI_ISL_1013410                                                                                                                                                                                                                                                                                                                                                                                                                                                                                                                                                                                                                                                                                                                                                                                                                                                                                                    | CHU - Hôpital Cavale Blanche                                                                                                                                                               | National Reference Center for Viruses of Respiratory Infections, Institut Pasteur, Paris                                | Marion Barbet, Sylvie Behillil, Méline Bizard, Angela Brisebarre, Camille Capel, Etienne Simon-Lorière, Vincent Enouf, Maud Vanpeene, Sylvie van der Werf,Pilorge LÉA                                                                                                                                      |
| EPI_ISL_1013418, EPI_ISL_1013419, EPI_ISL_1013420, EPI_ISL_1013421, EPI_ISL_1013422, EPI_ISL_1013423, EPI_ISL_1013424, EPI_ISL_1013425, EPI_ISL_1013426, EPI_ISL_1013427, EPI_ISL_1013428, EPI_ISL_1013429, EPI_ISL_1013430, EPI_ISL_1013431, EPI_ISL_1013432, EPI_ISL_1013433, EPI_ISL_1013434, EPI_ISL_1013435, EPI_ISL_1013436                                                                                                                                                                                                                                                                                                                                                                                                                                                                                                                                                                                                                    |                                                                                                                                                                                            |                                                                                                                         |                                                                                                                                                                                                                                                                                                            |
| see above                                                                                                                                                                                                                                                                                                                                                                                                                                                                                                                                                                                                                                                                                                                                                                                                                                                                                                                                            | Institut Pasteur de Guadeloupe                                                                                                                                                             | National Reference Center for Viruses of Respiratory Infections, Institut Pasteur, Paris                                | Marion Barbet, Sylvie Behillil, Méline Bizard, Angela Brisebarre, Camille Capel, Etienne Simon-Lorière, Vincent Enouf, Maud Vanpeene, Sylvie van der Werf,Talarmin Antoine                                                                                                                                 |
| EPI_ISL_1013438, EPI_ISL_1013439, EPI_ISL_1013440, EPI_ISL_1013441, EPI_ISL_1013442, EPI_ISL_1013443, EPI_ISL_1013445, EPI_ISL_1013446, EPI_ISL_1013447, EPI_ISL_1013448, EPI_ISL_1013449                                                                                                                                                                                                                                                                                                                                                                                                                                                                                                                                                                                                                                                                                                                                                            |                                                                                                                                                                                            |                                                                                                                         |                                                                                                                                                                                                                                                                                                            |
| see above                                                                                                                                                                                                                                                                                                                                                                                                                                                                                                                                                                                                                                                                                                                                                                                                                                                                                                                                            | Laboratoire associé au CNR des Virus Influenzae                                                                                                                                            | National Reference Center for Viruses of Respiratory Infections, Institut Pasteur, Paris                                | Marion Barbet, Sylvie Behillil, Méline Bizard, Angela Brisebarre, Camille Capel, Etienne Simon-Lorière, Vincent Enouf, Maud Vanpeene, Sylvie van der Werf,Rousset (Guy) Dominique                                                                                                                          |
| EPI_ISL_1013450, EPI_ISL_1013451                                                                                                                                                                                                                                                                                                                                                                                                                                                                                                                                                                                                                                                                                                                                                                                                                                                                                                                     | General Hospital - Kumanovo                                                                                                                                                                | Research Center for Genetic Engineering and Biotechnology                                                               | Aleksandar J. Dimovski, Dijana Plasheska-Karanfilska, Predrag Noveski, Gjorgji Bozinovski, Milena Jakimovska                                                                                                                                                                                               |



|                                                                                                                                                                                                                                                                                                                                                                                                                                                                                                                                                                                                                                                                                                                                                                                                                               |                                                                                      |                                                                                                                         |                                                                                                                                                                                                                                                                                                                                                                                                                                                                                                                                                                                                                                                                                                                                                                   |
|-------------------------------------------------------------------------------------------------------------------------------------------------------------------------------------------------------------------------------------------------------------------------------------------------------------------------------------------------------------------------------------------------------------------------------------------------------------------------------------------------------------------------------------------------------------------------------------------------------------------------------------------------------------------------------------------------------------------------------------------------------------------------------------------------------------------------------|--------------------------------------------------------------------------------------|-------------------------------------------------------------------------------------------------------------------------|-------------------------------------------------------------------------------------------------------------------------------------------------------------------------------------------------------------------------------------------------------------------------------------------------------------------------------------------------------------------------------------------------------------------------------------------------------------------------------------------------------------------------------------------------------------------------------------------------------------------------------------------------------------------------------------------------------------------------------------------------------------------|
| EPI_ISL_1014765                                                                                                                                                                                                                                                                                                                                                                                                                                                                                                                                                                                                                                                                                                                                                                                                               | Institute for Lung Diseases in Children - Skopje                                     | Arts                                                                                                                    | Aleksandar J. Dimovski, Dijana Plasheska-Karanfilska, Predrag Noveski, Gjorgji Bozinovski, Milena Jakimovska                                                                                                                                                                                                                                                                                                                                                                                                                                                                                                                                                                                                                                                      |
|                                                                                                                                                                                                                                                                                                                                                                                                                                                                                                                                                                                                                                                                                                                                                                                                                               |                                                                                      | Research Center for Genetic Engineering and Biotechnology "Georgi D. Efremov" , Macedonian Academy of Sciences and Arts |                                                                                                                                                                                                                                                                                                                                                                                                                                                                                                                                                                                                                                                                                                                                                                   |
| EPI_ISL_1014766                                                                                                                                                                                                                                                                                                                                                                                                                                                                                                                                                                                                                                                                                                                                                                                                               | General Hospital - Prilep                                                            | Research Center for Genetic Engineering and Biotechnology "Georgi D. Efremov" , Macedonian Academy of Sciences and Arts | Aleksandar J. Dimovski, Dijana Plasheska-Karanfilska, Predrag Noveski, Gjorgji Bozinovski, Milena Jakimovska                                                                                                                                                                                                                                                                                                                                                                                                                                                                                                                                                                                                                                                      |
| EPI_ISL_1014813, EPI_ISL_1014816, EPI_ISL_1014823, EPI_ISL_1014824, EPI_ISL_1014826, EPI_ISL_1014830, EPI_ISL_1014832, EPI_ISL_1014833, EPI_ISL_1014835, EPI_ISL_1014837, EPI_ISL_1014838, EPI_ISL_1014841, EPI_ISL_1014842, EPI_ISL_1014843, EPI_ISL_1014844, EPI_ISL_1014845, EPI_ISL_1014846, EPI_ISL_1014847, EPI_ISL_1014848, EPI_ISL_1014849, EPI_ISL_1014851, EPI_ISL_1014853, EPI_ISL_1014854, EPI_ISL_1014856, EPI_ISL_1014857, EPI_ISL_1014878, EPI_ISL_1014880, EPI_ISL_1014881, EPI_ISL_1014882, EPI_ISL_1014885, EPI_ISL_1014886, EPI_ISL_1014887, EPI_ISL_1014888, EPI_ISL_1014889, EPI_ISL_1014890, EPI_ISL_1014892, EPI_ISL_1014893, EPI_ISL_1014894, EPI_ISL_1014895, EPI_ISL_1014896, EPI_ISL_1014897, EPI_ISL_1014898, EPI_ISL_1014899, EPI_ISL_1014900, EPI_ISL_1014901, EPI_ISL_1014902, EPI_ISL_1014903 |                                                                                      |                                                                                                                         |                                                                                                                                                                                                                                                                                                                                                                                                                                                                                                                                                                                                                                                                                                                                                                   |
| see above                                                                                                                                                                                                                                                                                                                                                                                                                                                                                                                                                                                                                                                                                                                                                                                                                     | University of Michigan Clinical Microbiology Laboratory                              | Lauring Lab, University of Michigan, Department of Microbiology and Immunology                                          | Valesano                                                                                                                                                                                                                                                                                                                                                                                                                                                                                                                                                                                                                                                                                                                                                          |
| EPI_ISL_1014912                                                                                                                                                                                                                                                                                                                                                                                                                                                                                                                                                                                                                                                                                                                                                                                                               | General Hospital - Tetovo                                                            | Research Center for Genetic Engineering and Biotechnology "Georgi D. Efremov" , Macedonian Academy of Sciences and Arts | Aleksandar J. Dimovski, Dijana Plasheska-Karanfilska, Predrag Noveski, Gjorgji Bozinovski, Milena Jakimovska                                                                                                                                                                                                                                                                                                                                                                                                                                                                                                                                                                                                                                                      |
| EPI_ISL_1014933                                                                                                                                                                                                                                                                                                                                                                                                                                                                                                                                                                                                                                                                                                                                                                                                               | General Hospital - Strumica                                                          | Research Center for Genetic Engineering and Biotechnology "Georgi D. Efremov" , Macedonian Academy of Sciences and Arts | Aleksandar J. Dimovski, Dijana Plasheska-Karanfilska, Predrag Noveski, Gjorgji Bozinovski, Milena Jakimovska                                                                                                                                                                                                                                                                                                                                                                                                                                                                                                                                                                                                                                                      |
| EPI_ISL_1014934                                                                                                                                                                                                                                                                                                                                                                                                                                                                                                                                                                                                                                                                                                                                                                                                               | General Hospital - Ohrid                                                             | Research Center for Genetic Engineering and Biotechnology "Georgi D. Efremov" , Macedonian Academy of Sciences and Arts | Aleksandar J. Dimovski, Dijana Plasheska-Karanfilska, Predrag Noveski, Gjorgji Bozinovski, Milena Jakimovska                                                                                                                                                                                                                                                                                                                                                                                                                                                                                                                                                                                                                                                      |
| EPI_ISL_1014937                                                                                                                                                                                                                                                                                                                                                                                                                                                                                                                                                                                                                                                                                                                                                                                                               | Ohio Department of Health Laboratory                                                 | Ohio Department of Health Laboratory                                                                                    | Holmes, Jennifer; Eric Brandt, Keoni Omura, Glen McGillivray, Caitlin McDonnell, Jade Mowery, Stephanie Mccracken, Tyler Payne, Kirtana Ramadugu, Erica Leasure, Brent Lee, Kelsey Florek, Heather Blankenship, Quanta Brown, and Tammy Bannerman                                                                                                                                                                                                                                                                                                                                                                                                                                                                                                                 |
| EPI_ISL_1014938                                                                                                                                                                                                                                                                                                                                                                                                                                                                                                                                                                                                                                                                                                                                                                                                               | General Hospital - Veles                                                             | Research Center for Genetic Engineering and Biotechnology "Georgi D. Efremov" , Macedonian Academy of Sciences and Arts | Aleksandar J. Dimovski, Dijana Plasheska-Karanfilska, Predrag Noveski, Gjorgji Bozinovski, Milena Jakimovska                                                                                                                                                                                                                                                                                                                                                                                                                                                                                                                                                                                                                                                      |
| EPI_ISL_1014939                                                                                                                                                                                                                                                                                                                                                                                                                                                                                                                                                                                                                                                                                                                                                                                                               | General Hospital - Struga                                                            | Research Center for Genetic Engineering and Biotechnology "Georgi D. Efremov" , Macedonian Academy of Sciences and Arts | Aleksandar J. Dimovski, Dijana Plasheska-Karanfilska, Predrag Noveski, Gjorgji Bozinovski, Milena Jakimovska                                                                                                                                                                                                                                                                                                                                                                                                                                                                                                                                                                                                                                                      |
| EPI_ISL_1015343, EPI_ISL_1015345, EPI_ISL_1015350, EPI_ISL_1015351                                                                                                                                                                                                                                                                                                                                                                                                                                                                                                                                                                                                                                                                                                                                                            | New Mexico Department of Health Scientific Laboratory                                | Center for Global Health, University of New Mexico Health Sciences Center                                               | Daryl Domman, Kurt Schwalm, Twila Kunde, Joseph Hicks, Anastacia Griego, Michael Edwards, Darrell Dinwiddie                                                                                                                                                                                                                                                                                                                                                                                                                                                                                                                                                                                                                                                       |
| EPI_ISL_1015367                                                                                                                                                                                                                                                                                                                                                                                                                                                                                                                                                                                                                                                                                                                                                                                                               | Kingston Health Sciences Centre and Queen's University                               | Ontario Institute for Cancer Research                                                                                   | Prameet M. Sheth,Calvin Sjaarda,Robert Colautti,Katya Douchant,Ilinca Lungu,Bernard Lam,Jeremy Johns,Paul Krzyzanowski,Richard de Borja,Felicia Vincelli,Philip Zuzarte,Jared T. Simpson                                                                                                                                                                                                                                                                                                                                                                                                                                                                                                                                                                          |
| EPI_ISL_1015508, EPI_ISL_1015510, EPI_ISL_1015512, EPI_ISL_1015514                                                                                                                                                                                                                                                                                                                                                                                                                                                                                                                                                                                                                                                                                                                                                            | City of Milwaukee Health Department Laboratory                                       | City of Milwaukee Health Department Laboratory                                                                          | Sanjib Bhattacharyya                                                                                                                                                                                                                                                                                                                                                                                                                                                                                                                                                                                                                                                                                                                                              |
| EPI_ISL_1015516, EPI_ISL_1015520                                                                                                                                                                                                                                                                                                                                                                                                                                                                                                                                                                                                                                                                                                                                                                                              | Azienda Sanitaria dell'Alto Adige Laboratorio Aziendale di Microbiologia e Virologia | Istituto di Genomica Applicata                                                                                          | Elisabetta Pagani, Irene Bianconi, Elisabetta Giacobazzi, Elisa Masi, Stefanie Wieser, Irena Jurman, Vera Vendramin, Gabriele Magris, Eleonora Paparelli, Davide Scaglione, Michele Morgante                                                                                                                                                                                                                                                                                                                                                                                                                                                                                                                                                                      |
| EPI_ISL_1015602, EPI_ISL_1015603, EPI_ISL_1015648, EPI_ISL_1015652                                                                                                                                                                                                                                                                                                                                                                                                                                                                                                                                                                                                                                                                                                                                                            | Maryland Public Health Laboratory                                                    | Maryland Public Health Laboratory                                                                                       | Maryland Department of Health Laboratories Administration                                                                                                                                                                                                                                                                                                                                                                                                                                                                                                                                                                                                                                                                                                         |
| EPI_ISL_1015654, EPI_ISL_1015663, EPI_ISL_1015668, EPI_ISL_1015671, EPI_ISL_1015675, EPI_ISL_1015677, EPI_ISL_1015679, EPI_ISL_1015680, EPI_ISL_1015685, EPI_ISL_1015688, EPI_ISL_1015689, EPI_ISL_1015690, EPI_ISL_1015695, EPI_ISL_1015696, EPI_ISL_1015697, EPI_ISL_1015699, EPI_ISL_1015707                                                                                                                                                                                                                                                                                                                                                                                                                                                                                                                               | see above                                                                            | Columbia University Irving Medical Center                                                                               | Wadsworth Center, New York State Department of Health                                                                                                                                                                                                                                                                                                                                                                                                                                                                                                                                                                                                                                                                                                             |
| EPI_ISL_1015862, EPI_ISL_1015953, EPI_ISL_1015965                                                                                                                                                                                                                                                                                                                                                                                                                                                                                                                                                                                                                                                                                                                                                                             | Altius Institute for Biomedical Sciences                                             | Seattle Flu Study                                                                                                       | Kirsten St. George, Daryl M. Lamson, Alexis Russel, Matthew Shudt, Melissa A Leisner, Jonathan Plitnick, Navjot Singh, John Kelly, Erasmus Schneider, Erica Lasek-Nesselquist                                                                                                                                                                                                                                                                                                                                                                                                                                                                                                                                                                                     |
| EPI_ISL_1016112, EPI_ISL_1016113, EPI_ISL_1016114, EPI_ISL_1016115                                                                                                                                                                                                                                                                                                                                                                                                                                                                                                                                                                                                                                                                                                                                                            | Columbia University Irving Medical Center                                            | Wadsworth Center, New York State Department of Health                                                                   | Deborah A. Nickerson, Chris D. Frazar, Jover Lee, Benjamin Pelle, Erica Ryke, Matthew Richardson, Amanda Adler, Elisabeth Brandstetter, Peter D. Han, Kairsten Fay, Misja Ilcisin, Kirsten Lacombe, Thomas R. Sibley, Melissa Truong, Caitlin R. Wolf, Ryan Alexander, Daniel Bates, Rebecca Bruders, Stephanie DeBaun, Clem Green, Muhammad Halimun, Jessica Halow, Kneshay Harper, Matt Hartman, Andrew Meuser, Alex Nguyen, Truong Nguyen, Sofia Olsson, Sadie Patraw, Hannah Petersen, Tobias Ragoczy, Joshua Richards, Jacob Rodriguez, John Stamatoyannopoulos, Julia Wald, Olivia Waltner, Michael Boeckh, Janet A. Englund, Michael Famulare, Barry R. Lutz, Mark J. Rieder, Lea M. Starita, Matthew Thompson, Helen Y. Chu, Jay Shendure, Trevor Bedford |
| EPI_ISL_1016127, EPI_ISL_1016128, EPI_ISL_1016129, EPI_ISL_1016141, EPI_ISL_1016142                                                                                                                                                                                                                                                                                                                                                                                                                                                                                                                                                                                                                                                                                                                                           | THE MARY IMOGENE BASSETT HOSPITAL                                                    | Wadsworth Center, New York State Department of Health                                                                   | Kirsten St. George, Daryl M. Lamson, Alexis Russel, Matthew Shudt, Melissa A Leisner, Jonathan Plitnick, Navjot Singh, John Kelly, Erasmus Schneider, Erica Lasek-Nesselquist                                                                                                                                                                                                                                                                                                                                                                                                                                                                                                                                                                                     |
| EPI_ISL_1016143, EPI_ISL_1016148, EPI_ISL_1016150                                                                                                                                                                                                                                                                                                                                                                                                                                                                                                                                                                                                                                                                                                                                                                             | NORTHWELL HEALTH LABORATORIES                                                        | Wadsworth Center, New York State Department of Health                                                                   | Kirsten St. George, Daryl M. Lamson, Alexis Russel, Matthew Shudt, Melissa A Leisner, Jonathan Plitnick, Navjot Singh, John Kelly, Erasmus Schneider, Erica Lasek-Nesselquist                                                                                                                                                                                                                                                                                                                                                                                                                                                                                                                                                                                     |
| EPI_ISL_1016155                                                                                                                                                                                                                                                                                                                                                                                                                                                                                                                                                                                                                                                                                                                                                                                                               | THE MARY IMOGENE BASSETT HOSPITAL                                                    | Wadsworth Center, New York State Department of Health                                                                   | Kirsten St. George, Daryl M. Lamson, Alexis Russel, Matthew Shudt, Melissa A Leisner, Jonathan Plitnick, Navjot Singh, John Kelly, Erasmus Schneider, Erica Lasek-Nesselquist                                                                                                                                                                                                                                                                                                                                                                                                                                                                                                                                                                                     |
| EPI_ISL_1016156, EPI_ISL_1016157, EPI_ISL_1016162, EPI_ISL_1016163, EPI_ISL_1016166                                                                                                                                                                                                                                                                                                                                                                                                                                                                                                                                                                                                                                                                                                                                           | NORTHWELL HEALTH LABORATORIES                                                        | Wadsworth Center, New York State Department of Health                                                                   | Kirsten St. George, Daryl M. Lamson, Alexis Russel, Matthew Shudt, Melissa A Leisner, Jonathan Plitnick, Navjot Singh, John Kelly, Erasmus Schneider, Erica Lasek-Nesselquist                                                                                                                                                                                                                                                                                                                                                                                                                                                                                                                                                                                     |
| EPI_ISL_1016174, EPI_ISL_1016184, EPI_ISL_1016190, EPI_ISL_1016191, EPI_ISL_1016194, EPI_ISL_1016206, EPI_ISL_1016212, EPI_ISL_1016214, EPI_ISL_1016215                                                                                                                                                                                                                                                                                                                                                                                                                                                                                                                                                                                                                                                                       | MONTEFIORE MEDICAL CENTER LABORATORIES                                               | Wadsworth Center, New York State Department of Health                                                                   | Kirsten St. George, Daryl M. Lamson, Alexis Russel, Matthew Shudt, Melissa A Leisner, Jonathan Plitnick, Navjot Singh, John Kelly, Erasmus Schneider, Erica Lasek-Nesselquist                                                                                                                                                                                                                                                                                                                                                                                                                                                                                                                                                                                     |
| EPI_ISL_1016229, EPI_ISL_1016230, EPI_ISL_1016232, EPI_ISL_1016234, EPI_ISL_1016235                                                                                                                                                                                                                                                                                                                                                                                                                                                                                                                                                                                                                                                                                                                                           | New York Presbyterian Hospital                                                       | Wadsworth Center, New York State Department of Health                                                                   | Kirsten St. George, Daryl M. Lamson, Alexis Russel, Matthew Shudt, Melissa A Leisner, Jonathan Plitnick, Navjot Singh, John Kelly, Erasmus Schneider, Erica Lasek-Nesselquist                                                                                                                                                                                                                                                                                                                                                                                                                                                                                                                                                                                     |
| EPI_ISL_1016257                                                                                                                                                                                                                                                                                                                                                                                                                                                                                                                                                                                                                                                                                                                                                                                                               | THE MARY IMOGENE BASSETT HOSPITAL                                                    | Wadsworth Center, New York State Department of Health                                                                   | Kirsten St. George, Daryl M. Lamson, Alexis Russel, Matthew Shudt, Melissa A Leisner, Jonathan Plitnick, Navjot Singh, John Kelly, Erasmus Schneider, Erica Lasek-Nesselquist                                                                                                                                                                                                                                                                                                                                                                                                                                                                                                                                                                                     |
| EPI_ISL_1016262, EPI_ISL_1016266, EPI_ISL_1016269, EPI_ISL_1016272, EPI_ISL_1016273, EPI_ISL_1016278                                                                                                                                                                                                                                                                                                                                                                                                                                                                                                                                                                                                                                                                                                                          | New York Presbyterian Hospital                                                       | Wadsworth Center, New York State Department of Health                                                                   | Kirsten St. George, Daryl M. Lamson, Alexis Russel, Matthew Shudt, Melissa A Leisner, Jonathan Plitnick, Navjot Singh, John Kelly, Erasmus Schneider, Erica Lasek-Nesselquist                                                                                                                                                                                                                                                                                                                                                                                                                                                                                                                                                                                     |

|                                                                                                                                                                                                                                                                                                                                                                     |                                                                                                         |                                                                                                                   |                                                                                                                                                                                                                                                                                                                                                                                                                                                                                                                                                                                                          |                                                                                                                                                                                                                                                                                                                                                                                                                                                                                                                                                                                                |
|---------------------------------------------------------------------------------------------------------------------------------------------------------------------------------------------------------------------------------------------------------------------------------------------------------------------------------------------------------------------|---------------------------------------------------------------------------------------------------------|-------------------------------------------------------------------------------------------------------------------|----------------------------------------------------------------------------------------------------------------------------------------------------------------------------------------------------------------------------------------------------------------------------------------------------------------------------------------------------------------------------------------------------------------------------------------------------------------------------------------------------------------------------------------------------------------------------------------------------------|------------------------------------------------------------------------------------------------------------------------------------------------------------------------------------------------------------------------------------------------------------------------------------------------------------------------------------------------------------------------------------------------------------------------------------------------------------------------------------------------------------------------------------------------------------------------------------------------|
| EPI_ISL_1016285, EPI_ISL_1016286                                                                                                                                                                                                                                                                                                                                    | SUNY UPSTATE MEDICAL UNIVERSITY                                                                         | Wadsworth Center, New York State Department of Health                                                             | Kirsten St. George, Daryl M. Lamson, Alexis Russel, Matthew Shudt, Melissa A Leisner, Jonathan Plitnick, Navjot Singh, John Kelly, Erasmus Schneider, Erica Lasek-Nesselquist                                                                                                                                                                                                                                                                                                                                                                                                                            |                                                                                                                                                                                                                                                                                                                                                                                                                                                                                                                                                                                                |
| EPI_ISL_1016294                                                                                                                                                                                                                                                                                                                                                     | Columbia University Irving Medical Center                                                               | Wadsworth Center, New York State Department of Health                                                             | Kirsten St. George, Daryl M. Lamson, Alexis Russel, Matthew Shudt, Melissa A Leisner, Jonathan Plitnick, Navjot Singh, John Kelly, Erasmus Schneider, Erica Lasek-Nesselquist                                                                                                                                                                                                                                                                                                                                                                                                                            |                                                                                                                                                                                                                                                                                                                                                                                                                                                                                                                                                                                                |
| EPI_ISL_1016300, EPI_ISL_1016301, EPI_ISL_1016302                                                                                                                                                                                                                                                                                                                   | SUNY UPSTATE MEDICAL UNIVERSITY                                                                         | Wadsworth Center, New York State Department of Health                                                             | Kirsten St. George, Daryl M. Lamson, Alexis Russel, Matthew Shudt, Melissa A Leisner, Jonathan Plitnick, Navjot Singh, John Kelly, Erasmus Schneider, Erica Lasek-Nesselquist                                                                                                                                                                                                                                                                                                                                                                                                                            |                                                                                                                                                                                                                                                                                                                                                                                                                                                                                                                                                                                                |
| EPI_ISL_1016307, EPI_ISL_1016308, EPI_ISL_1016309                                                                                                                                                                                                                                                                                                                   | New York Presbyterian Hospital                                                                          | Wadsworth Center, New York State Department of Health                                                             | Kirsten St. George, Daryl M. Lamson, Alexis Russel, Matthew Shudt, Melissa A Leisner, Jonathan Plitnick, Navjot Singh, John Kelly, Erasmus Schneider, Erica Lasek-Nesselquist                                                                                                                                                                                                                                                                                                                                                                                                                            |                                                                                                                                                                                                                                                                                                                                                                                                                                                                                                                                                                                                |
| EPI_ISL_1016315, EPI_ISL_1016316, EPI_ISL_1016317, EPI_ISL_1016318, EPI_ISL_1016320                                                                                                                                                                                                                                                                                 | SUNY UPSTATE MEDICAL UNIVERSITY                                                                         | Wadsworth Center, New York State Department of Health                                                             | Kirsten St. George, Daryl M. Lamson, Alexis Russel, Matthew Shudt, Melissa A Leisner, Jonathan Plitnick, Navjot Singh, John Kelly, Erasmus Schneider, Erica Lasek-Nesselquist                                                                                                                                                                                                                                                                                                                                                                                                                            |                                                                                                                                                                                                                                                                                                                                                                                                                                                                                                                                                                                                |
| EPI_ISL_1016324                                                                                                                                                                                                                                                                                                                                                     | Columbia University Irving Medical Center                                                               | Wadsworth Center, New York State Department of Health                                                             | Kirsten St. George, Daryl M. Lamson, Alexis Russel, Matthew Shudt, Melissa A Leisner, Jonathan Plitnick, Navjot Singh, John Kelly, Erasmus Schneider, Erica Lasek-Nesselquist                                                                                                                                                                                                                                                                                                                                                                                                                            |                                                                                                                                                                                                                                                                                                                                                                                                                                                                                                                                                                                                |
| EPI_ISL_1016327                                                                                                                                                                                                                                                                                                                                                     | SUNY UPSTATE MEDICAL UNIVERSITY                                                                         | Wadsworth Center, New York State Department of Health                                                             | Kirsten St. George, Daryl M. Lamson, Alexis Russel, Matthew Shudt, Melissa A Leisner, Jonathan Plitnick, Navjot Singh, John Kelly, Erasmus Schneider, Erica Lasek-Nesselquist                                                                                                                                                                                                                                                                                                                                                                                                                            |                                                                                                                                                                                                                                                                                                                                                                                                                                                                                                                                                                                                |
| EPI_ISL_1016328                                                                                                                                                                                                                                                                                                                                                     | Columbia University Irving Medical Center                                                               | Wadsworth Center, New York State Department of Health                                                             | Kirsten St. George, Daryl M. Lamson, Alexis Russel, Matthew Shudt, Melissa A Leisner, Jonathan Plitnick, Navjot Singh, John Kelly, Erasmus Schneider, Erica Lasek-Nesselquist                                                                                                                                                                                                                                                                                                                                                                                                                            |                                                                                                                                                                                                                                                                                                                                                                                                                                                                                                                                                                                                |
| EPI_ISL_1016341                                                                                                                                                                                                                                                                                                                                                     | New York Presbyterian Hospital                                                                          | Wadsworth Center, New York State Department of Health                                                             | Kirsten St. George, Daryl M. Lamson, Alexis Russel, Matthew Shudt, Melissa A Leisner, Jonathan Plitnick, Navjot Singh, John Kelly, Erasmus Schneider, Erica Lasek-Nesselquist                                                                                                                                                                                                                                                                                                                                                                                                                            |                                                                                                                                                                                                                                                                                                                                                                                                                                                                                                                                                                                                |
| EPI_ISL_1016348, EPI_ISL_1016351, EPI_ISL_1016352, EPI_ISL_1016356, EPI_ISL_1016358, EPI_ISL_1016359, EPI_ISL_1016360, EPI_ISL_1016361, EPI_ISL_1016363, EPI_ISL_1016364                                                                                                                                                                                            | URMC LABS                                                                                               | Wadsworth Center, New York State Department of Health                                                             | Kirsten St. George, Daryl M. Lamson, Alexis Russel, Matthew Shudt, Melissa A Leisner, Jonathan Plitnick, Navjot Singh, John Kelly, Erasmus Schneider, Erica Lasek-Nesselquist                                                                                                                                                                                                                                                                                                                                                                                                                            |                                                                                                                                                                                                                                                                                                                                                                                                                                                                                                                                                                                                |
| EPI_ISL_1016368, EPI_ISL_1016372                                                                                                                                                                                                                                                                                                                                    | New York Presbyterian Hospital                                                                          | Wadsworth Center, New York State Department of Health                                                             | Kirsten St. George, Daryl M. Lamson, Alexis Russel, Matthew Shudt, Melissa A Leisner, Jonathan Plitnick, Navjot Singh, John Kelly, Erasmus Schneider, Erica Lasek-Nesselquist                                                                                                                                                                                                                                                                                                                                                                                                                            |                                                                                                                                                                                                                                                                                                                                                                                                                                                                                                                                                                                                |
| EPI_ISL_1016375, EPI_ISL_1016376                                                                                                                                                                                                                                                                                                                                    | WESTCHESTER MEDICAL CENTER                                                                              | Wadsworth Center, New York State Department of Health                                                             | Kirsten St. George, Daryl M. Lamson, Alexis Russel, Matthew Shudt, Melissa A Leisner, Jonathan Plitnick, Navjot Singh, John Kelly, Erasmus Schneider, Erica Lasek-Nesselquist                                                                                                                                                                                                                                                                                                                                                                                                                            |                                                                                                                                                                                                                                                                                                                                                                                                                                                                                                                                                                                                |
| EPI_ISL_1016382, EPI_ISL_1016384, EPI_ISL_1016386, EPI_ISL_1016387, EPI_ISL_1016388, EPI_ISL_1016392, EPI_ISL_1016396, EPI_ISL_1016398, EPI_ISL_1016400, EPI_ISL_1016401                                                                                                                                                                                            | New York Presbyterian Hospital                                                                          | Wadsworth Center, New York State Department of Health                                                             | Kirsten St. George, Daryl M. Lamson, Alexis Russel, Matthew Shudt, Melissa A Leisner, Jonathan Plitnick, Navjot Singh, John Kelly, Erasmus Schneider, Erica Lasek-Nesselquist                                                                                                                                                                                                                                                                                                                                                                                                                            |                                                                                                                                                                                                                                                                                                                                                                                                                                                                                                                                                                                                |
| EPI_ISL_1016418, EPI_ISL_1016421, EPI_ISL_1016424, EPI_ISL_1016425, EPI_ISL_1016427, EPI_ISL_1016431, EPI_ISL_1016437, EPI_ISL_1016439, EPI_ISL_1016443, EPI_ISL_1016444, EPI_ISL_1016445, EPI_ISL_1016446, EPI_ISL_1016447, EPI_ISL_1016448, EPI_ISL_1016449, EPI_ISL_1016454                                                                                      | see above                                                                                               | URMC LABS                                                                                                         | Wadsworth Center, New York State Department of Health                                                                                                                                                                                                                                                                                                                                                                                                                                                                                                                                                    | Kirsten St. George, Daryl M. Lamson, Alexis Russel, Matthew Shudt, Melissa A Leisner, Jonathan Plitnick, Navjot Singh, John Kelly, Erasmus Schneider, Erica Lasek-Nesselquist                                                                                                                                                                                                                                                                                                                                                                                                                  |
| EPI_ISL_1016458                                                                                                                                                                                                                                                                                                                                                     | NORTHWELL HEALTH LABORATORIES                                                                           | Wadsworth Center, New York State Department of Health                                                             | Kirsten St. George, Daryl M. Lamson, Alexis Russel, Matthew Shudt, Melissa A Leisner, Jonathan Plitnick, Navjot Singh, John Kelly, Erasmus Schneider, Erica Lasek-Nesselquist                                                                                                                                                                                                                                                                                                                                                                                                                            |                                                                                                                                                                                                                                                                                                                                                                                                                                                                                                                                                                                                |
| EPI_ISL_1016464, EPI_ISL_1016465, EPI_ISL_1016467                                                                                                                                                                                                                                                                                                                   | STONY BROOK UNIVERSITY HOSPITAL                                                                         | Wadsworth Center, New York State Department of Health                                                             | Kirsten St. George, Daryl M. Lamson, Alexis Russel, Matthew Shudt, Melissa A Leisner, Jonathan Plitnick, Navjot Singh, John Kelly, Erasmus Schneider, Erica Lasek-Nesselquist                                                                                                                                                                                                                                                                                                                                                                                                                            |                                                                                                                                                                                                                                                                                                                                                                                                                                                                                                                                                                                                |
| EPI_ISL_1016470, EPI_ISL_1016471, EPI_ISL_1016473                                                                                                                                                                                                                                                                                                                   | ALBANY MEDICAL CENTER HOSPITAL CLINICAL LABORATORIES                                                    | Wadsworth Center, New York State Department of Health                                                             | Kirsten St. George, Daryl M. Lamson, Alexis Russel, Matthew Shudt, Melissa A Leisner, Jonathan Plitnick, Navjot Singh, John Kelly, Erasmus Schneider, Erica Lasek-Nesselquist                                                                                                                                                                                                                                                                                                                                                                                                                            |                                                                                                                                                                                                                                                                                                                                                                                                                                                                                                                                                                                                |
| EPI_ISL_1016476                                                                                                                                                                                                                                                                                                                                                     | STONY BROOK UNIVERSITY HOSPITAL                                                                         | Wadsworth Center, New York State Department of Health                                                             | Kirsten St. George, Daryl M. Lamson, Alexis Russel, Matthew Shudt, Melissa A Leisner, Jonathan Plitnick, Navjot Singh, John Kelly, Erasmus Schneider, Erica Lasek-Nesselquist                                                                                                                                                                                                                                                                                                                                                                                                                            |                                                                                                                                                                                                                                                                                                                                                                                                                                                                                                                                                                                                |
| EPI_ISL_1016491, EPI_ISL_1016498, EPI_ISL_1016504, EPI_ISL_1016505                                                                                                                                                                                                                                                                                                  | University of Miami Immunology and Histocompatibility Laboratory                                        | University of Miami Immunology and Histocompatibility Laboratory                                                  | Emilio Margolles-Clark, PhD and Phillip Ruiz, MD, PhD                                                                                                                                                                                                                                                                                                                                                                                                                                                                                                                                                    |                                                                                                                                                                                                                                                                                                                                                                                                                                                                                                                                                                                                |
| EPI_ISL_1016628, EPI_ISL_1016630, EPI_ISL_1016634, EPI_ISL_1016636, EPI_ISL_1016639, EPI_ISL_1016658, EPI_ISL_1016666, EPI_ISL_1016667, EPI_ISL_1016668, EPI_ISL_1016672, EPI_ISL_1016770                                                                                                                                                                           | see above                                                                                               | Helix/Illumina                                                                                                    | Respiratory Viruses Branch, Division of Viral Diseases, Centers for Disease Control and Prevention                                                                                                                                                                                                                                                                                                                                                                                                                                                                                                       | Peter W. Cook, Dakota Howard, Dhvani Batra, Ben L. Rambo-Martin, Eileen de Feo, Jan Antico, Christine Tran, Matthew Tolentino, Shannon Wickline, Kim Gietzen, Brad Sickler, Jingtao Liu, Eric Allen, Phil Febbo, Summer Galloway, Nicole L. Washington, Simon White, Geraint Levan, Kelly Schiabor Barrett, Elizabeth Cirulli, Alexandre Bolze, Ary Ascencio, Charlotte Rivera-Garcia, Ryan Cho, Jason Nguyen, Sherry Wang, Jimmy Ramirez, Tyler Cassens, Elen Sandoval, Magnus Isaksson, William Lee, David Becker, Marc Laurent, James Lu, Clinton R. Paden, Suxiang Tong, Duncan MacCannell |
| EPI_ISL_1016822                                                                                                                                                                                                                                                                                                                                                     | University of Sarajevo, Veterinary Faculty, Laboratory for Molecular Diagnostic and Research Laboratory | University of Sarajevo, Veterinary Faculty, Laboratory for Molecular Diagnostic and Research Laboratory           | Goletic T., Goletic S., Softic A., Alic-Seho A., Hodzic A., Sabic E., Nicevic M., Terzic I., Jazic A.                                                                                                                                                                                                                                                                                                                                                                                                                                                                                                    |                                                                                                                                                                                                                                                                                                                                                                                                                                                                                                                                                                                                |
| EPI_ISL_1016842                                                                                                                                                                                                                                                                                                                                                     | University of Sarajevo, Veterinary Faculty, Laboratory for Molecular Diagnostic and Research Laboratory | University of Sarajevo, Veterinary Faculty, Laboratory for Molecular Diagnostic and Research Laboratory           | Goletic T., Goletic S., Softic A., Alic-Seho A., Nicevic M., Jazic A., Hodzic A., Terzic I., Sabic E.                                                                                                                                                                                                                                                                                                                                                                                                                                                                                                    |                                                                                                                                                                                                                                                                                                                                                                                                                                                                                                                                                                                                |
| EPI_ISL_1016843                                                                                                                                                                                                                                                                                                                                                     | University of Sarajevo, Veterinary Faculty, Laboratory for Molecular Diagnostic and Research Laboratory | University of Sarajevo, Veterinary Faculty, Laboratory for Molecular Diagnostic and Research Laboratory           | Goletic T., Goletic S., Softic A., Alic-Seho A., Hodzic A., Terzic I., Jazic A., Sabic E., Nicevic M.                                                                                                                                                                                                                                                                                                                                                                                                                                                                                                    |                                                                                                                                                                                                                                                                                                                                                                                                                                                                                                                                                                                                |
| EPI_ISL_1016861, EPI_ISL_1016880                                                                                                                                                                                                                                                                                                                                    | LabPLUS                                                                                                 | Institute of Environmental Science and Research (ESR)                                                             | Xiaoyun Ren, Matt Storey, Nikki Freed, Muhammad Faisal, Jing Wang, Hermes Perez, Anja Werno, Antje van der Linden, Arlo Upton, Chris Mansell, David Hammer, Dragana Drinkovic, Gary McAuliffe, Hana Sofia Andersson, James Ussher, Jill Sherwood, Josh Freeman, Julia Howard, Juliet Elvy, Mary DeAlmeida, Matt Blakiston, Matthew Rogers, Max Bloomfield, Michael Addidle, Michelle Balm, Sally Roberts, Sarah Jefferies, Sharmini Muttaiyah, Susan Morpeth, Susan Taylor, Timothy Blackmore, Vani Sathyendran, Veronica Playle, Virginia Hope, Erasmus Smit, Lauren Jelly, Olin Silander, Joep de Ligt |                                                                                                                                                                                                                                                                                                                                                                                                                                                                                                                                                                                                |
| EPI_ISL_1017487, EPI_ISL_1017496                                                                                                                                                                                                                                                                                                                                    | Murphy Medical Associates                                                                               | Grubaugh Lab - Yale School of Public Health                                                                       | Mary Petrone, Joseph Fauver, Caleb Neal, Steven Murphy, Chantal Vogels, Mallery Brehan, Annie Watkins, Tara Alpert, Nathan Grubaugh                                                                                                                                                                                                                                                                                                                                                                                                                                                                      |                                                                                                                                                                                                                                                                                                                                                                                                                                                                                                                                                                                                |
| EPI_ISL_1017682, EPI_ISL_1017692, EPI_ISL_1017693, EPI_ISL_1017696                                                                                                                                                                                                                                                                                                  | Institute of Virology, Vaccines and Sera "Torlak"                                                       | Institute of microbiology and Immunology, Faculty of Medicine, University of Belgrade                             | Knezevic,A., Jankovic,M., Vidanovic,D., Milicevic,O., Tesovic,B., Sekler,M., Jovanovic,T.                                                                                                                                                                                                                                                                                                                                                                                                                                                                                                                |                                                                                                                                                                                                                                                                                                                                                                                                                                                                                                                                                                                                |
| EPI_ISL_1017837, EPI_ISL_1017847, EPI_ISL_1017852, EPI_ISL_1017874, EPI_ISL_1017876, EPI_ISL_1017883, EPI_ISL_1017893, EPI_ISL_1017894, EPI_ISL_1017896, EPI_ISL_1017897, EPI_ISL_1017898, EPI_ISL_1017904, EPI_ISL_1017906, EPI_ISL_1017907, EPI_ISL_1017913, EPI_ISL_1017914, EPI_ISL_1017916, EPI_ISL_1017920, EPI_ISL_1017921, EPI_ISL_1017927, EPI_ISL_1017947 | see above                                                                                               | Wyoming Public Health Laboratory                                                                                  | Noah Hull, Taylor Fearing, Lynette Gumbleton, Channing Weber, Ashley Norberg, Bailey Bowcutt, and Wanda Manley                                                                                                                                                                                                                                                                                                                                                                                                                                                                                           |                                                                                                                                                                                                                                                                                                                                                                                                                                                                                                                                                                                                |
| EPI_ISL_1018071, EPI_ISL_1018072, EPI_ISL_1018073, EPI_ISL_1018074, EPI_ISL_1018076, EPI_ISL_1018077, EPI_ISL_1018078, EPI_ISL_1018082, EPI_ISL_1018083, EPI_ISL_1018084, EPI_ISL_1018085, EPI_ISL_1018086, EPI_ISL_1018087                                                                                                                                         | see above                                                                                               | Immunology, Noguchi Memorial Institute for Medical Research                                                       | Adu,B., Egyir,B., Kumordjie,S., Agbodzi,B., Yeboah,C., Mohktar,Q., Oteng,F., Owusu-Nyantakyi,C., Asare,K.M., Appiah-Kubi,J., Adusei-Poku,M.A., Odoom,J.K., Ampofo,W.K., Bonney,J.K.                                                                                                                                                                                                                                                                                                                                                                                                                      |                                                                                                                                                                                                                                                                                                                                                                                                                                                                                                                                                                                                |
| EPI_ISL_1018102                                                                                                                                                                                                                                                                                                                                                     | General Hospital - Strumica                                                                             | Research Center for Genetic Engineering and Biotechnology "Georgi D. Efremov", Macedonian Academy of Sciences and | Aleksandar J. Dimovski, Dijana Plasheska-Karanfiska, Predrag Noveski, Gjorgji Bozinovski, Milena Jakimovska                                                                                                                                                                                                                                                                                                                                                                                                                                                                                              |                                                                                                                                                                                                                                                                                                                                                                                                                                                                                                                                                                                                |

|                                                                                                                                                                                                                                                                                                                                                                                                                                                                                                                                                                                                                                                                                                                                                                                                                                                                                                                                                                                                                                                                                                                                                                                                                                                                                                                                                                                                                                                                                                                                                                                                                                                                                                                                                                                                                                                                                                                                                                                                                                                                                                                                                                                                                                                                                                                                                     |                                                       |                                                                                                                         |                                                                                                                                                                                                                                                                                                                              |
|-----------------------------------------------------------------------------------------------------------------------------------------------------------------------------------------------------------------------------------------------------------------------------------------------------------------------------------------------------------------------------------------------------------------------------------------------------------------------------------------------------------------------------------------------------------------------------------------------------------------------------------------------------------------------------------------------------------------------------------------------------------------------------------------------------------------------------------------------------------------------------------------------------------------------------------------------------------------------------------------------------------------------------------------------------------------------------------------------------------------------------------------------------------------------------------------------------------------------------------------------------------------------------------------------------------------------------------------------------------------------------------------------------------------------------------------------------------------------------------------------------------------------------------------------------------------------------------------------------------------------------------------------------------------------------------------------------------------------------------------------------------------------------------------------------------------------------------------------------------------------------------------------------------------------------------------------------------------------------------------------------------------------------------------------------------------------------------------------------------------------------------------------------------------------------------------------------------------------------------------------------------------------------------------------------------------------------------------------------|-------------------------------------------------------|-------------------------------------------------------------------------------------------------------------------------|------------------------------------------------------------------------------------------------------------------------------------------------------------------------------------------------------------------------------------------------------------------------------------------------------------------------------|
| EPI_ISL_1018103                                                                                                                                                                                                                                                                                                                                                                                                                                                                                                                                                                                                                                                                                                                                                                                                                                                                                                                                                                                                                                                                                                                                                                                                                                                                                                                                                                                                                                                                                                                                                                                                                                                                                                                                                                                                                                                                                                                                                                                                                                                                                                                                                                                                                                                                                                                                     | General Hospital - Ohrid                              | Arts                                                                                                                    |                                                                                                                                                                                                                                                                                                                              |
|                                                                                                                                                                                                                                                                                                                                                                                                                                                                                                                                                                                                                                                                                                                                                                                                                                                                                                                                                                                                                                                                                                                                                                                                                                                                                                                                                                                                                                                                                                                                                                                                                                                                                                                                                                                                                                                                                                                                                                                                                                                                                                                                                                                                                                                                                                                                                     |                                                       | Research Center for Genetic Engineering and Biotechnology "Georgi D. Efremov" , Macedonian Academy of Sciences and Arts | Aleksandar J. Dimovski, Dijana Plasheska-Karanfilska, Predrag Noveski, Gjorgji Bozinovski, Milena Jakimovska                                                                                                                                                                                                                 |
|                                                                                                                                                                                                                                                                                                                                                                                                                                                                                                                                                                                                                                                                                                                                                                                                                                                                                                                                                                                                                                                                                                                                                                                                                                                                                                                                                                                                                                                                                                                                                                                                                                                                                                                                                                                                                                                                                                                                                                                                                                                                                                                                                                                                                                                                                                                                                     |                                                       | Research Center for Genetic Engineering and Biotechnology "Georgi D. Efremov" , Macedonian Academy of Sciences and Arts | Aleksandar J. Dimovski, Dijana Plasheska-Karanfilska, Predrag Noveski, Gjorgji Bozinovski, Milena Jakimovska                                                                                                                                                                                                                 |
|                                                                                                                                                                                                                                                                                                                                                                                                                                                                                                                                                                                                                                                                                                                                                                                                                                                                                                                                                                                                                                                                                                                                                                                                                                                                                                                                                                                                                                                                                                                                                                                                                                                                                                                                                                                                                                                                                                                                                                                                                                                                                                                                                                                                                                                                                                                                                     |                                                       | Research Center for Genetic Engineering and Biotechnology "Georgi D. Efremov" , Macedonian Academy of Sciences and Arts | Ileksandar J. Dimovski, Dijana Plasheska-Karanfilska, Predrag Noveski, Gjorgji Bozinovski, Milena Jakimovska                                                                                                                                                                                                                 |
|                                                                                                                                                                                                                                                                                                                                                                                                                                                                                                                                                                                                                                                                                                                                                                                                                                                                                                                                                                                                                                                                                                                                                                                                                                                                                                                                                                                                                                                                                                                                                                                                                                                                                                                                                                                                                                                                                                                                                                                                                                                                                                                                                                                                                                                                                                                                                     |                                                       | Research Center for Genetic Engineering and Biotechnology "Georgi D. Efremov" , Macedonian Academy of Sciences and Arts | Aleksandar J. Dimovski, Dijana Plasheska-Karanfilska, Predrag Noveski, Gjorgji Bozinovski, Milena Jakimovska                                                                                                                                                                                                                 |
|                                                                                                                                                                                                                                                                                                                                                                                                                                                                                                                                                                                                                                                                                                                                                                                                                                                                                                                                                                                                                                                                                                                                                                                                                                                                                                                                                                                                                                                                                                                                                                                                                                                                                                                                                                                                                                                                                                                                                                                                                                                                                                                                                                                                                                                                                                                                                     |                                                       | Research Center for Genetic Engineering and Biotechnology "Georgi D. Efremov" , Macedonian Academy of Sciences and Arts | Aleksandar J. Dimovski, Dijana Plasheska-Karanfilska, Predrag Noveski, Gjorgji Bozinovski, Milena Jakimovska                                                                                                                                                                                                                 |
|                                                                                                                                                                                                                                                                                                                                                                                                                                                                                                                                                                                                                                                                                                                                                                                                                                                                                                                                                                                                                                                                                                                                                                                                                                                                                                                                                                                                                                                                                                                                                                                                                                                                                                                                                                                                                                                                                                                                                                                                                                                                                                                                                                                                                                                                                                                                                     |                                                       | Research Center for Genetic Engineering and Biotechnology "Georgi D. Efremov" , Macedonian Academy of Sciences and Arts | Aleksandar J. Dimovski, Dijana Plasheska-Karanfilska, Predrag Noveski, Gjorgji Bozinovski, Milena Jakimovska                                                                                                                                                                                                                 |
|                                                                                                                                                                                                                                                                                                                                                                                                                                                                                                                                                                                                                                                                                                                                                                                                                                                                                                                                                                                                                                                                                                                                                                                                                                                                                                                                                                                                                                                                                                                                                                                                                                                                                                                                                                                                                                                                                                                                                                                                                                                                                                                                                                                                                                                                                                                                                     |                                                       | Research Center for Genetic Engineering and Biotechnology "Georgi D. Efremov" , Macedonian Academy of Sciences and Arts | Aleksandar J. Dimovski, Dijana Plasheska-Karanfilska, Predrag Noveski, Gjorgji Bozinovski, Milena Jakimovska                                                                                                                                                                                                                 |
| EPI_ISL_1018114, EPI_ISL_1018116                                                                                                                                                                                                                                                                                                                                                                                                                                                                                                                                                                                                                                                                                                                                                                                                                                                                                                                                                                                                                                                                                                                                                                                                                                                                                                                                                                                                                                                                                                                                                                                                                                                                                                                                                                                                                                                                                                                                                                                                                                                                                                                                                                                                                                                                                                                    | AZ Klina                                              | AZ Klina                                                                                                                |                                                                                                                                                                                                                                                                                                                              |
|                                                                                                                                                                                                                                                                                                                                                                                                                                                                                                                                                                                                                                                                                                                                                                                                                                                                                                                                                                                                                                                                                                                                                                                                                                                                                                                                                                                                                                                                                                                                                                                                                                                                                                                                                                                                                                                                                                                                                                                                                                                                                                                                                                                                                                                                                                                                                     |                                                       | Dr. C. Vael                                                                                                             |                                                                                                                                                                                                                                                                                                                              |
| EPI_ISL_1018117                                                                                                                                                                                                                                                                                                                                                                                                                                                                                                                                                                                                                                                                                                                                                                                                                                                                                                                                                                                                                                                                                                                                                                                                                                                                                                                                                                                                                                                                                                                                                                                                                                                                                                                                                                                                                                                                                                                                                                                                                                                                                                                                                                                                                                                                                                                                     | General Hospital - Shtip                              | Research Center for Genetic Engineering and Biotechnology "Georgi D. Efremov" , Macedonian Academy of Sciences and Arts | Aleksandar J. Dimovski, Dijana Plasheska-Karanfilska, Predrag Noveski, Gjorgji Bozinovski, Milena Jakimovska                                                                                                                                                                                                                 |
|                                                                                                                                                                                                                                                                                                                                                                                                                                                                                                                                                                                                                                                                                                                                                                                                                                                                                                                                                                                                                                                                                                                                                                                                                                                                                                                                                                                                                                                                                                                                                                                                                                                                                                                                                                                                                                                                                                                                                                                                                                                                                                                                                                                                                                                                                                                                                     |                                                       |                                                                                                                         |                                                                                                                                                                                                                                                                                                                              |
| EPI_ISL_1018220, EPI_ISL_1018222, EPI_ISL_1018223, EPI_ISL_1018227                                                                                                                                                                                                                                                                                                                                                                                                                                                                                                                                                                                                                                                                                                                                                                                                                                                                                                                                                                                                                                                                                                                                                                                                                                                                                                                                                                                                                                                                                                                                                                                                                                                                                                                                                                                                                                                                                                                                                                                                                                                                                                                                                                                                                                                                                  | Althaiia. Xarxa Assistencial Universitària de Manresa | IrsiCaixa - Can Ruti CovidSeq                                                                                           | Marc Noguera-Julian, Mariona Parera, Maria Casadellà, Pilar Armengol, Francesc Catala-Moll, Roger Paredes, Bonaventura Clotet Gloria Trujillo, Rafel Perez Vidal, Jaume Trape Pujol, Carolina Gonzalez Fernandez, Roger Paredes, Eulalia Grau, Bonaventura Clotet                                                            |
| EPI_ISL_1018766                                                                                                                                                                                                                                                                                                                                                                                                                                                                                                                                                                                                                                                                                                                                                                                                                                                                                                                                                                                                                                                                                                                                                                                                                                                                                                                                                                                                                                                                                                                                                                                                                                                                                                                                                                                                                                                                                                                                                                                                                                                                                                                                                                                                                                                                                                                                     | Lighthouse Lab in Cambridge                           | Wellcome Sanger Institute for the COVID-19 Genomics UK (COG-UK) Consortium                                              | Rob Howes, The Lighthouse Lab in Cambridge and Alex Alderton, Roberto Amato, Jeffrey Barrett, Sonia Goncalves, Ewan Harrison, David K. Jackson, Ian Johnston, Dominic Kwiatkowski, Cordelia Langford, John Sillitoe on behalf of the Wellcome Sanger Institute COVID-19 Surveillance Team                                    |
| EPI_ISL_1019586                                                                                                                                                                                                                                                                                                                                                                                                                                                                                                                                                                                                                                                                                                                                                                                                                                                                                                                                                                                                                                                                                                                                                                                                                                                                                                                                                                                                                                                                                                                                                                                                                                                                                                                                                                                                                                                                                                                                                                                                                                                                                                                                                                                                                                                                                                                                     | Lighthouse Lab in Milton Keynes                       | Wellcome Sanger Institute for the COVID-19 Genomics UK (COG-UK) Consortium                                              | The Lighthouse Lab in Milton Keynes and Alex Alderton, Roberto Amato, Jeffrey Barrett, Sonia Goncalves, Ewan Harrison, David K. Jackson, Ian Johnston, Dominic Kwiatkowski, Cordelia Langford, John Sillitoe on behalf of the Wellcome Sanger Institute COVID-19 Surveillance Team                                           |
| EPI_ISL_1019587, EPI_ISL_1019592, EPI_ISL_1019597, EPI_ISL_1019600, EPI_ISL_1019601, EPI_ISL_1019605, EPI_ISL_1019606, EPI_ISL_1019609, EPI_ISL_1019611, EPI_ISL_1019612, EPI_ISL_1019613, EPI_ISL_1019615, EPI_ISL_1019617, EPI_ISL_1019618, EPI_ISL_1019619, EPI_ISL_1019620, EPI_ISL_1019621, EPI_ISL_1019622, EPI_ISL_1019623, EPI_ISL_1019624, EPI_ISL_1019625, EPI_ISL_1019626, EPI_ISL_1019630, EPI_ISL_1019631, EPI_ISL_1019632, EPI_ISL_1019633, EPI_ISL_1019634, EPI_ISL_1019635, EPI_ISL_1019636, EPI_ISL_1019638, EPI_ISL_1019639, EPI_ISL_1019641, EPI_ISL_1019644, EPI_ISL_1019646, EPI_ISL_1019648, EPI_ISL_1019649, EPI_ISL_1019652, EPI_ISL_1019654, EPI_ISL_1019656, EPI_ISL_1019667, EPI_ISL_1019669, EPI_ISL_1019670, EPI_ISL_1019675, EPI_ISL_1019677, EPI_ISL_1019679, EPI_ISL_1019682, EPI_ISL_1019684, EPI_ISL_1019690, EPI_ISL_1019694, EPI_ISL_1019698, EPI_ISL_1019701, EPI_ISL_1019704, EPI_ISL_1019708, EPI_ISL_1019709, EPI_ISL_1019711, EPI_ISL_1019714, EPI_ISL_1019717, EPI_ISL_1019721, EPI_ISL_1019723, EPI_ISL_1019727, EPI_ISL_1019728, EPI_ISL_1019733, EPI_ISL_1019735, EPI_ISL_1019736, EPI_ISL_1019740, EPI_ISL_1019741, EPI_ISL_1019743, EPI_ISL_1019744, EPI_ISL_1019746, EPI_ISL_1019747, EPI_ISL_1019749, EPI_ISL_1019752, EPI_ISL_1019755, EPI_ISL_1019757, EPI_ISL_1019760, EPI_ISL_1019766, EPI_ISL_1019774, EPI_ISL_1019776, EPI_ISL_1019777, EPI_ISL_1019782, EPI_ISL_1019784, EPI_ISL_1019786, EPI_ISL_1019791, EPI_ISL_1019792, EPI_ISL_1019794, EPI_ISL_1019796, EPI_ISL_1019817, EPI_ISL_1019819, EPI_ISL_1019821, EPI_ISL_1019824, EPI_ISL_1019826, EPI_ISL_1019829, EPI_ISL_1019844, EPI_ISL_1019848, EPI_ISL_1019850, EPI_ISL_1019859, EPI_ISL_1019860, EPI_ISL_1019864, EPI_ISL_1019868, EPI_ISL_1019870, EPI_ISL_1019879, EPI_ISL_1019881, EPI_ISL_1019889, EPI_ISL_1019891, EPI_ISL_1019895, EPI_ISL_1019896, EPI_ISL_1019898, EPI_ISL_1019902, EPI_ISL_1019904, EPI_ISL_1019907, EPI_ISL_1019918, EPI_ISL_1019921, EPI_ISL_1019931, EPI_ISL_1019935, EPI_ISL_1019944, EPI_ISL_1019949, EPI_ISL_1019954, EPI_ISL_1019959, EPI_ISL_1019964, EPI_ISL_1019967, EPI_ISL_1019972, EPI_ISL_1019973, EPI_ISL_1019980, EPI_ISL_1019981, EPI_ISL_1019989, EPI_ISL_1019994, EPI_ISL_1019998, EPI_ISL_1020001, EPI_ISL_1020003, EPI_ISL_1020004, EPI_ISL_1020006, EPI_ISL_1020008, EPI_ISL_1020009 |                                                       |                                                                                                                         |                                                                                                                                                                                                                                                                                                                              |
| see above                                                                                                                                                                                                                                                                                                                                                                                                                                                                                                                                                                                                                                                                                                                                                                                                                                                                                                                                                                                                                                                                                                                                                                                                                                                                                                                                                                                                                                                                                                                                                                                                                                                                                                                                                                                                                                                                                                                                                                                                                                                                                                                                                                                                                                                                                                                                           | Lighthouse Lab in Glasgow                             | Wellcome Sanger Institute for the COVID-19 Genomics UK (COG-UK) Consortium                                              | Harper VanSteenhouse, Yumi Kasai, David Gray, Carol Clugston, Anna Dominiczak and Alex Alderton, Roberto Amato, Jeffrey Barrett, Sonia Goncalves, Ewan Harrison, David K. Jackson, Ian Johnston, Dominic Kwiatkowski, Cordelia Langford, John Sillitoe on behalf of the Wellcome Sanger Institute COVID-19 Surveillance Team |
| EPI_ISL_1020017                                                                                                                                                                                                                                                                                                                                                                                                                                                                                                                                                                                                                                                                                                                                                                                                                                                                                                                                                                                                                                                                                                                                                                                                                                                                                                                                                                                                                                                                                                                                                                                                                                                                                                                                                                                                                                                                                                                                                                                                                                                                                                                                                                                                                                                                                                                                     | Hospital San Agustín                                  | Laboratorio de Virología HUCA                                                                                           | Sandoval M, Castelló C, Gómez de Oña J, Boga JA, Rojo S, Alvarez-Arguelles ME, Abreu F, Costales I, Perez-Martínez Z, Martín-Rodríguez G, Coto E, Melón S                                                                                                                                                                    |
| EPI_ISL_1020121, EPI_ISL_1020122, EPI_ISL_1020123                                                                                                                                                                                                                                                                                                                                                                                                                                                                                                                                                                                                                                                                                                                                                                                                                                                                                                                                                                                                                                                                                                                                                                                                                                                                                                                                                                                                                                                                                                                                                                                                                                                                                                                                                                                                                                                                                                                                                                                                                                                                                                                                                                                                                                                                                                   | Laboratorio de Virología HUCA                         | Laboratorio de Virología HUCA                                                                                           | Sandoval M, Castelló C, Gómez de Oña J, Boga JA, Rojo S, Alvarez-Arguelles ME, Abreu F, Costales I, Perez-Martínez Z, Martín-Rodríguez G, Coto E, Melón S                                                                                                                                                                    |
| EPI_ISL_1020124                                                                                                                                                                                                                                                                                                                                                                                                                                                                                                                                                                                                                                                                                                                                                                                                                                                                                                                                                                                                                                                                                                                                                                                                                                                                                                                                                                                                                                                                                                                                                                                                                                                                                                                                                                                                                                                                                                                                                                                                                                                                                                                                                                                                                                                                                                                                     | Hospital de Cabueñes                                  | Laboratorio de Virología HUCA                                                                                           | Sandoval M, Castelló C, Gómez de Oña J, Boga JA, Rojo S, Alvarez-Arguelles ME, Abreu F, Costales I, Perez-Martínez Z, Martín-Rodríguez G, Coto E, Melón S                                                                                                                                                                    |
| EPI_ISL_1020125                                                                                                                                                                                                                                                                                                                                                                                                                                                                                                                                                                                                                                                                                                                                                                                                                                                                                                                                                                                                                                                                                                                                                                                                                                                                                                                                                                                                                                                                                                                                                                                                                                                                                                                                                                                                                                                                                                                                                                                                                                                                                                                                                                                                                                                                                                                                     | Hospital San Agustín                                  | Laboratorio de Virología HUCA                                                                                           | Sandoval M, Castelló C, Gómez de Oña J, Boga JA, Rojo S, Alvarez-Arguelles ME, Abreu F, Costales I, Perez-Martínez Z, Martín-Rodríguez G, Coto E, Melón S                                                                                                                                                                    |
| EPI_ISL_1020126, EPI_ISL_1020128                                                                                                                                                                                                                                                                                                                                                                                                                                                                                                                                                                                                                                                                                                                                                                                                                                                                                                                                                                                                                                                                                                                                                                                                                                                                                                                                                                                                                                                                                                                                                                                                                                                                                                                                                                                                                                                                                                                                                                                                                                                                                                                                                                                                                                                                                                                    | Laboratorio de Virología HUCA                         | Laboratorio de Virología HUCA                                                                                           | Sandoval M, Castelló C, Gómez de Oña J, Boga JA, Rojo S, Alvarez-Arguelles ME, Abreu F, Costales I, Perez-Martínez Z, Martín-Rodríguez G, Coto E, Melón S                                                                                                                                                                    |
| EPI_ISL_1020131                                                                                                                                                                                                                                                                                                                                                                                                                                                                                                                                                                                                                                                                                                                                                                                                                                                                                                                                                                                                                                                                                                                                                                                                                                                                                                                                                                                                                                                                                                                                                                                                                                                                                                                                                                                                                                                                                                                                                                                                                                                                                                                                                                                                                                                                                                                                     | University Clinic of Nephrology- Skopje               | Research Center for Genetic Engineering and Biotechnology "Georgi D. Efremov" , Macedonian Academy of Sciences and Arts | Aleksandar J. Dimovski, Dijana Plasheska-Karanfilska, Predrag Noveski, Gjorgji Bozinovski, Milena Jakimovska                                                                                                                                                                                                                 |
| EPI_ISL_1020132                                                                                                                                                                                                                                                                                                                                                                                                                                                                                                                                                                                                                                                                                                                                                                                                                                                                                                                                                                                                                                                                                                                                                                                                                                                                                                                                                                                                                                                                                                                                                                                                                                                                                                                                                                                                                                                                                                                                                                                                                                                                                                                                                                                                                                                                                                                                     | Laboratorio de Virología HUCA                         | Laboratorio de Virología HUCA                                                                                           | Sandoval M, Castelló C, Gómez de Oña J, Boga JA, Rojo S, Alvarez-Arguelles ME, Abreu F, Costales I, Perez-Martínez Z, Martín-Rodríguez G, Coto E, Melón S                                                                                                                                                                    |
| EPI_ISL_1020134                                                                                                                                                                                                                                                                                                                                                                                                                                                                                                                                                                                                                                                                                                                                                                                                                                                                                                                                                                                                                                                                                                                                                                                                                                                                                                                                                                                                                                                                                                                                                                                                                                                                                                                                                                                                                                                                                                                                                                                                                                                                                                                                                                                                                                                                                                                                     | University Clinic of Nephrology- Skopje               | Research Center for Genetic Engineering and Biotechnology "Georgi D. Efremov" , Macedonian Academy of Sciences and Arts | Aleksandar J. Dimovski, Dijana Plasheska-Karanfilska, Predrag Noveski, Gjorgji Bozinovski, Milena Jakimovska                                                                                                                                                                                                                 |
| EPI_ISL_1020135                                                                                                                                                                                                                                                                                                                                                                                                                                                                                                                                                                                                                                                                                                                                                                                                                                                                                                                                                                                                                                                                                                                                                                                                                                                                                                                                                                                                                                                                                                                                                                                                                                                                                                                                                                                                                                                                                                                                                                                                                                                                                                                                                                                                                                                                                                                                     | Laboratorio de Virología HUCA                         | Laboratorio de Virología HUCA                                                                                           | Sandoval M, Castelló C, Gómez de Oña J, Boga JA, Rojo S, Alvarez-Arguelles ME, Abreu F, Costales I, Perez-Martínez Z, Martín-Rodríguez G, Coto E, Melón S                                                                                                                                                                    |
| EPI_ISL_1020138, EPI_ISL_1020141, EPI_ISL_1020143                                                                                                                                                                                                                                                                                                                                                                                                                                                                                                                                                                                                                                                                                                                                                                                                                                                                                                                                                                                                                                                                                                                                                                                                                                                                                                                                                                                                                                                                                                                                                                                                                                                                                                                                                                                                                                                                                                                                                                                                                                                                                                                                                                                                                                                                                                   | University Clinic of Nephrology- Skopje               | Research Center for Genetic Engineering and Biotechnology "Georgi D. Efremov" , Macedonian Academy of Sciences and Arts | Aleksandar J. Dimovski, Dijana Plasheska-Karanfilska, Predrag Noveski, Gjorgji Bozinovski, Milena Jakimovska                                                                                                                                                                                                                 |
| EPI_ISL_1020145                                                                                                                                                                                                                                                                                                                                                                                                                                                                                                                                                                                                                                                                                                                                                                                                                                                                                                                                                                                                                                                                                                                                                                                                                                                                                                                                                                                                                                                                                                                                                                                                                                                                                                                                                                                                                                                                                                                                                                                                                                                                                                                                                                                                                                                                                                                                     | Hospital de Cabueñes                                  | Laboratorio de Virología HUCA                                                                                           | Sandoval M, Castelló C, Gómez de Oña J, Boga JA, Rojo S, Alvarez-Arguelles ME, Abreu F, Costales I, Perez-Martínez Z, Martín-Rodríguez G, Coto E, Melón S                                                                                                                                                                    |
| EPI_ISL_1020146                                                                                                                                                                                                                                                                                                                                                                                                                                                                                                                                                                                                                                                                                                                                                                                                                                                                                                                                                                                                                                                                                                                                                                                                                                                                                                                                                                                                                                                                                                                                                                                                                                                                                                                                                                                                                                                                                                                                                                                                                                                                                                                                                                                                                                                                                                                                     | University Clinic of Nephrology- Skopje               | Research Center for Genetic Engineering and Biotechnology "Georgi D. Efremov" , Macedonian Academy of Sciences and Arts | Ileksandar J. Dimovski, Dijana Plasheska-Karanfilska, Predrag Noveski, Gjorgji Bozinovski, Milena Jakimovska                                                                                                                                                                                                                 |

















|                                                                                                                                                                                                                                                                                                                                                                                                                                                                                                                                                                                                                                                                                       |                                                                                                                                                                                  |                                                                                                                        |                                                                                                                                                                                                                                                                                                                                                                                                                                                                                                 |
|---------------------------------------------------------------------------------------------------------------------------------------------------------------------------------------------------------------------------------------------------------------------------------------------------------------------------------------------------------------------------------------------------------------------------------------------------------------------------------------------------------------------------------------------------------------------------------------------------------------------------------------------------------------------------------------|----------------------------------------------------------------------------------------------------------------------------------------------------------------------------------|------------------------------------------------------------------------------------------------------------------------|-------------------------------------------------------------------------------------------------------------------------------------------------------------------------------------------------------------------------------------------------------------------------------------------------------------------------------------------------------------------------------------------------------------------------------------------------------------------------------------------------|
| EPI_ISL_1049102, EPI_ISL_1049103, EPI_ISL_1049104, EPI_ISL_1049105, EPI_ISL_1049114, EPI_ISL_1049115, EPI_ISL_1049117, EPI_ISL_1049118, EPI_ISL_1049119, EPI_ISL_1049120, EPI_ISL_1049121, EPI_ISL_1049122, EPI_ISL_1049128, EPI_ISL_1049129, EPI_ISL_1049131, EPI_ISL_1049132, EPI_ISL_1049166, EPI_ISL_1049167, EPI_ISL_1049168, EPI_ISL_1049170, EPI_ISL_1049171, EPI_ISL_1049172, EPI_ISL_1049173, EPI_ISL_1049175, EPI_ISL_1049176, EPI_ISL_1049181, EPI_ISL_1049183, EPI_ISL_1049184, EPI_ISL_1049188, EPI_ISL_1049189, EPI_ISL_1049190, EPI_ISL_1049191, EPI_ISL_1049193, EPI_ISL_1049194, EPI_ISL_1049195, EPI_ISL_1049197, EPI_ISL_1049199, EPI_ISL_1049201, EPI_ISL_1049202 |                                                                                                                                                                                  |                                                                                                                        |                                                                                                                                                                                                                                                                                                                                                                                                                                                                                                 |
| see above                                                                                                                                                                                                                                                                                                                                                                                                                                                                                                                                                                                                                                                                             | KU Leuven, Rega Institute, Clinical and Epidemiological Virology                                                                                                                 | KU Leuven, Rega Institute, Clinical and Epidemiological Virology                                                       | Tony Wawina-Bokalanga, Bert Vanmechelen, Joan Marti-Carerras, Piet Maes                                                                                                                                                                                                                                                                                                                                                                                                                         |
| EPI_ISL_1049207, EPI_ISL_1049208                                                                                                                                                                                                                                                                                                                                                                                                                                                                                                                                                                                                                                                      | Blackhawk Genomics                                                                                                                                                               | Pathogen Discovery, Respiratory Viruses Branch, Division of Viral Diseases, Centers for Disease Control and Prevention | Ying Tao, Jing Zhang, Yan Li, Brian Lynch, Krista Queen, Anna Uehara, Peter Cook, Han Jia Ng, Clinton R. Paden, Haibin Wang, Suxiang Tong                                                                                                                                                                                                                                                                                                                                                       |
| EPI_ISL_1049209                                                                                                                                                                                                                                                                                                                                                                                                                                                                                                                                                                                                                                                                       | PA Department of Health, Bureau of Laboratories                                                                                                                                  | Pathogen Discovery, Respiratory Viruses Branch, Division of Viral Diseases, Centers for Disease Control and Prevention | Ying Tao, Jing Zhang, Yan Li, Brian Lynch, Krista Queen, Anna Uehara, Peter Cook, Han Jia Ng, Clinton R. Paden, Haibin Wang, Suxiang Tong                                                                                                                                                                                                                                                                                                                                                       |
| EPI_ISL_1049210, EPI_ISL_1049211                                                                                                                                                                                                                                                                                                                                                                                                                                                                                                                                                                                                                                                      | Blackhawk Genomics                                                                                                                                                               | Pathogen Discovery, Respiratory Viruses Branch, Division of Viral Diseases, Centers for Disease Control and Prevention | Ying Tao, Jing Zhang, Yan Li, Brian Lynch, Krista Queen, Anna Uehara, Peter Cook, Han Jia Ng, Clinton R. Paden, Haibin Wang, Suxiang Tong                                                                                                                                                                                                                                                                                                                                                       |
| EPI_ISL_1049212, EPI_ISL_1049213                                                                                                                                                                                                                                                                                                                                                                                                                                                                                                                                                                                                                                                      | PA Department of Health, Bureau of Laboratories                                                                                                                                  | Pathogen Discovery, Respiratory Viruses Branch, Division of Viral Diseases, Centers for Disease Control and Prevention | Ying Tao, Jing Zhang, Yan Li, Brian Lynch, Krista Queen, Anna Uehara, Peter Cook, Han Jia Ng, Clinton R. Paden, Haibin Wang, Suxiang Tong                                                                                                                                                                                                                                                                                                                                                       |
| EPI_ISL_1049220                                                                                                                                                                                                                                                                                                                                                                                                                                                                                                                                                                                                                                                                       | Blackhawk Genomics                                                                                                                                                               | Pathogen Discovery, Respiratory Viruses Branch, Division of Viral Diseases, Centers for Disease Control and Prevention | Ying Tao, Jing Zhang, Yan Li, Brian Lynch, Krista Queen, Anna Uehara, Peter Cook, Han Jia Ng, Clinton R. Paden, Haibin Wang, Suxiang Tong                                                                                                                                                                                                                                                                                                                                                       |
| EPI_ISL_1049223                                                                                                                                                                                                                                                                                                                                                                                                                                                                                                                                                                                                                                                                       | PA Department of Health, Bureau of Laboratories                                                                                                                                  | Pathogen Discovery, Respiratory Viruses Branch, Division of Viral Diseases, Centers for Disease Control and Prevention | Ying Tao, Jing Zhang, Yan Li, Brian Lynch, Krista Queen, Anna Uehara, Peter Cook, Han Jia Ng, Clinton R. Paden, Haibin Wang, Suxiang Tong                                                                                                                                                                                                                                                                                                                                                       |
| EPI_ISL_1049225                                                                                                                                                                                                                                                                                                                                                                                                                                                                                                                                                                                                                                                                       | TN Division of Laboratory Services                                                                                                                                               | Pathogen Discovery, Respiratory Viruses Branch, Division of Viral Diseases, Centers for Disease Control and Prevention | Ying Tao, Jing Zhang, Yan Li, Brian Lynch, Krista Queen, Anna Uehara, Peter Cook, Han Jia Ng, Clinton R. Paden, Haibin Wang, Suxiang Tong                                                                                                                                                                                                                                                                                                                                                       |
| EPI_ISL_1049227, EPI_ISL_1049243, EPI_ISL_1049244, EPI_ISL_1049245, EPI_ISL_1049246, EPI_ISL_1049247, EPI_ISL_1049248, EPI_ISL_1049249, EPI_ISL_1049250, EPI_ISL_1049251, EPI_ISL_1049252, EPI_ISL_1049253, EPI_ISL_1049254, EPI_ISL_1049255, EPI_ISL_1049256, EPI_ISL_1049257                                                                                                                                                                                                                                                                                                                                                                                                        |                                                                                                                                                                                  |                                                                                                                        |                                                                                                                                                                                                                                                                                                                                                                                                                                                                                                 |
| see above                                                                                                                                                                                                                                                                                                                                                                                                                                                                                                                                                                                                                                                                             | Utah Public Health Laboratory                                                                                                                                                    | Utah Public Health Laboratory                                                                                          | Erin L. Young, Kelly F. Oakeson, Tara Gallagher                                                                                                                                                                                                                                                                                                                                                                                                                                                 |
| EPI_ISL_1049483, EPI_ISL_1049484, EPI_ISL_1049485, EPI_ISL_1049486, EPI_ISL_1049488, EPI_ISL_1049489, EPI_ISL_1049490, EPI_ISL_1049491, EPI_ISL_1049492, EPI_ISL_1049493, EPI_ISL_1049494, EPI_ISL_1049495, EPI_ISL_1049496, EPI_ISL_1049497, EPI_ISL_1049498, EPI_ISL_1049499, EPI_ISL_1049500, EPI_ISL_1049501, EPI_ISL_1049502, EPI_ISL_1049504, EPI_ISL_1049505, EPI_ISL_1049506, EPI_ISL_1049507                                                                                                                                                                                                                                                                                 |                                                                                                                                                                                  |                                                                                                                        |                                                                                                                                                                                                                                                                                                                                                                                                                                                                                                 |
| see above                                                                                                                                                                                                                                                                                                                                                                                                                                                                                                                                                                                                                                                                             | Alaska State Virology Laboratory                                                                                                                                                 | Alaska State Virology Laboratory                                                                                       | Stephanie DeRonde, Lisa Smith, Ph.D., Jack Chen, Ph.D.                                                                                                                                                                                                                                                                                                                                                                                                                                          |
| EPI_ISL_1049562, EPI_ISL_1049569                                                                                                                                                                                                                                                                                                                                                                                                                                                                                                                                                                                                                                                      | Washington State Department of Health                                                                                                                                            | Seattle Flu Study                                                                                                      | Deborah A. Nickerson, Chris D. Frazar, Jover Lee, Benjamin Pelle, Erica Ryke, Matthew Richardson, Amanda Adler, Elisabeth Brandstetter, Peter D. Han, Kairsten Fay, Misja Ilcisin, Kirsten Lacombe, Thomas R. Sibley, Melissa Truong, Caitlin R. Wolf, Romesh Gautom, Geoff Melly, Brian Hiatt, Philip Dykema, Scott Lindquist, Michael Boeckh, Janet A. Englund, Michael Famulare, Barry R. Lutz, Mark J. Rieder, Lea M. Starita, Matthew Thompson, Helen Y. Chu, Jay Shendure, Trevor Bedford |
| EPI_ISL_1049927, EPI_ISL_1049928, EPI_ISL_1049940, EPI_ISL_1049942, EPI_ISL_1049943, EPI_ISL_1049944, EPI_ISL_1049945, EPI_ISL_1049946, EPI_ISL_1049947, EPI_ISL_1049948, EPI_ISL_1049949, EPI_ISL_1049950, EPI_ISL_1049951, EPI_ISL_1049952, EPI_ISL_1049953, EPI_ISL_1049954, EPI_ISL_1049955, EPI_ISL_1049956, EPI_ISL_1049958, EPI_ISL_1049959, EPI_ISL_1049961, EPI_ISL_1049964, EPI_ISL_1049965, EPI_ISL_1049966, EPI_ISL_1049967, EPI_ISL_1049968, EPI_ISL_1049969, EPI_ISL_1049970, EPI_ISL_1049971, EPI_ISL_1049972, EPI_ISL_1049973, EPI_ISL_1049974, EPI_ISL_1049975, EPI_ISL_1049976, EPI_ISL_1049977                                                                     |                                                                                                                                                                                  |                                                                                                                        |                                                                                                                                                                                                                                                                                                                                                                                                                                                                                                 |
| see above                                                                                                                                                                                                                                                                                                                                                                                                                                                                                                                                                                                                                                                                             | Florida Bureau of Public Health Laboratories                                                                                                                                     | Florida Bureau of Public Health Laboratories                                                                           | Sarah Schmedes, Jason Blanton                                                                                                                                                                                                                                                                                                                                                                                                                                                                   |
| EPI_ISL_1050065                                                                                                                                                                                                                                                                                                                                                                                                                                                                                                                                                                                                                                                                       | Virology Department, Sheffield Teaching Hospitals NHS Foundation Trust/Department of Infection, Immunity and Cardiovascular Disease, The Medical School, University of Sheffield | COVID-19 Genomics UK (COG-UK) Consortium                                                                               | Thushan de Silva, Matthew Parker, Nikki Smith, Adri Angyal, Rebecca Brown, Luke Green, Rachel Tucker, Paul Parsons, Danielle Groves, Katie Johnson, Laura Carrilero, Alex Keeley, Dave Partridge, Matthew Wyles, Benjamin Lindsey, Mehmet Yavuz, Mohammad Raza, Cariad Evans                                                                                                                                                                                                                    |
| EPI_ISL_1050222, EPI_ISL_1050234                                                                                                                                                                                                                                                                                                                                                                                                                                                                                                                                                                                                                                                      | West of Scotland Specialist Virology Centre, NHSGGC / MRC-University of Glasgow Centre for Virus Research                                                                        | COVID-19 Genomics UK (COG-UK) Consortium                                                                               | Ana da Silva Filipe, Natasha Johnson, Kathy Smollett, Daniel Mair, Stephen Carmichael, Alice Broos, Lily Tong, Jenna Nichols, Kyriaki Nomikou; Sarah McDonald; Richard Orton, Joseph Hughes, Sreenu Vattipally, David L Robertson; Alasdair MacLean, Rory Gunson; Sharif Shaaban, Matthew Holden; Rachel Blacow, Guy Mollett, Kathy Li, James Shepherd, Antonia Ho, Emma Thomson                                                                                                                |
| EPI_ISL_1050239                                                                                                                                                                                                                                                                                                                                                                                                                                                                                                                                                                                                                                                                       | Lighthouse Lab in Glasgow / MRC-University of Glasgow Centre for Virus Research                                                                                                  | COVID-19 Genomics UK (COG-UK) Consortium                                                                               | Ana da Silva Filipe, Natasha Johnson, Kathy Smollett, Daniel Mair, Stephen Carmichael, Alice Broos, Lily Tong, Jenna Nichols, Kyriaki Nomikou; Sarah McDonald; Harper VanSteenhouse, Yumi Kasai, David Gray, Carol Clugston, Anna Dominiczak; Alasdair MacLean, Rory Gunson; Richard Orton, Joseph Hughes, Sreenu Vattipally, David L Robertson; Sharif Shaaban, Matthew Holden; Kathy Li, James Shepherd, Antonia Ho, Emma Thomson                                                             |
| EPI_ISL_1050293, EPI_ISL_1050295, EPI_ISL_1050297, EPI_ISL_1050306                                                                                                                                                                                                                                                                                                                                                                                                                                                                                                                                                                                                                    | University of Exeter                                                                                                                                                             | COVID-19 Genomics UK (COG-UK) Consortium                                                                               | Ben Temperton, Aaron Jeffries, Michelle Michelsen, Joanna Warwick-Dugdale, Audrey Farbos, Robyn Manley, Stephen Michell, Jane Masoli                                                                                                                                                                                                                                                                                                                                                            |
| EPI_ISL_1050380, EPI_ISL_1050381                                                                                                                                                                                                                                                                                                                                                                                                                                                                                                                                                                                                                                                      | KU Leuven, Rega Institute, Clinical and Epidemiological Virology                                                                                                                 | KU Leuven, Rega Institute, Clinical and Epidemiological Virology                                                       | Tony Wawina-Bokalanga, Bert Vanmechelen, Joan Marti-Carerras, Piet Maes                                                                                                                                                                                                                                                                                                                                                                                                                         |
| EPI_ISL_1050605, EPI_ISL_1050606, EPI_ISL_1050610, EPI_ISL_1050614, EPI_ISL_1050619, EPI_ISL_1050633, EPI_ISL_1050637, EPI_ISL_1050640, EPI_ISL_1050642, EPI_ISL_1050644, EPI_ISL_1050645, EPI_ISL_1050649, EPI_ISL_1050653, EPI_ISL_1050655, EPI_ISL_1050661, EPI_ISL_1050663, EPI_ISL_1050664, EPI_ISL_1050665, EPI_ISL_1050670, EPI_ISL_1050672, EPI_ISL_1050673, EPI_ISL_1050675, EPI_ISL_1050689, EPI_ISL_1050690, EPI_ISL_1050694, EPI_ISL_1050696, EPI_ISL_1050698, EPI_ISL_1050700, EPI_ISL_1050701, EPI_ISL_1050702, EPI_ISL_1050705, EPI_ISL_1050709, EPI_ISL_1050710, EPI_ISL_1050711, EPI_ISL_1050712, EPI_ISL_1050719, EPI_ISL_1050720, EPI_ISL_1050721, EPI_ISL_1050722 |                                                                                                                                                                                  |                                                                                                                        |                                                                                                                                                                                                                                                                                                                                                                                                                                                                                                 |
| see above                                                                                                                                                                                                                                                                                                                                                                                                                                                                                                                                                                                                                                                                             | Department of Pathology, University of Cambridge                                                                                                                                 | COVID-19 Genomics UK (COG-UK) Consortium                                                                               | Aminu S. Jahun, Yasmin Chaudhry, Iliana Georgana, Myra Hosmillo, Rhys Izuagbe, William L. Hamilton, Martin D. Curran, Surendra Parmar, Ian Goodfellow                                                                                                                                                                                                                                                                                                                                           |
| EPI_ISL_1050764, EPI_ISL_1050772, EPI_ISL_1050779, EPI_ISL_1050781, EPI_ISL_1050782, EPI_ISL_1050783, EPI_ISL_1050786, EPI_ISL_1050787, EPI_ISL_1050802, EPI_ISL_1050823, EPI_ISL_1050824, EPI_ISL_1050826                                                                                                                                                                                                                                                                                                                                                                                                                                                                            |                                                                                                                                                                                  |                                                                                                                        |                                                                                                                                                                                                                                                                                                                                                                                                                                                                                                 |
| see above                                                                                                                                                                                                                                                                                                                                                                                                                                                                                                                                                                                                                                                                             | Centre for Enzyme Innovation, University of Portsmouth / Translational Research Laboratory, Portsmouth Hospitals NHS Trust                                                       | COVID-19 Genomics UK (COG-UK) Consortium                                                                               | Angela Beckett, Salman Goudarzi, Christopher Fearn, Kate Cook, Katie Loveson, Sharon Glaysheer, Scott Elliott, Samuel Robson                                                                                                                                                                                                                                                                                                                                                                    |
| EPI_ISL_1050831, EPI_ISL_1050832                                                                                                                                                                                                                                                                                                                                                                                                                                                                                                                                                                                                                                                      | Virology Department, Sheffield Teaching Hospitals NHS Foundation Trust/Department of Infection, Immunity and Cardiovascular Disease, The Medical School, University of Sheffield | COVID-19 Genomics UK (COG-UK) Consortium                                                                               | Thushan de Silva, Matthew Parker, Nikki Smith, Adri Angyal, Rebecca Brown, Luke Green, Rachel Tucker, Paul Parsons, Danielle Groves, Katie Johnson, Laura Carrilero, Alex Keeley, Dave Partridge, Matthew Wyles, Benjamin Lindsey, Mehmet Yavuz, Mohammad Raza, Cariad Evans                                                                                                                                                                                                                    |
| EPI_ISL_1050838, EPI_ISL_1050844, EPI_ISL_1050845                                                                                                                                                                                                                                                                                                                                                                                                                                                                                                                                                                                                                                     | Centre for Enzyme Innovation, University of Portsmouth / Translational Research Laboratory, Portsmouth Hospitals NHS Trust                                                       | COVID-19 Genomics UK (COG-UK) Consortium                                                                               | Angela Beckett, Salman Goudarzi, Christopher Fearn, Kate Cook, Katie Loveson, Sharon Glaysheer, Scott Elliott, Samuel Robson                                                                                                                                                                                                                                                                                                                                                                    |
| EPI_ISL_1050865, EPI_ISL_1050867, EPI_ISL_1050870                                                                                                                                                                                                                                                                                                                                                                                                                                                                                                                                                                                                                                     | Virology Department, Sheffield Teaching Hospitals NHS Foundation Trust/Department of Infection, Immunity and Cardiovascular Disease, The Medical School, University of Sheffield | COVID-19 Genomics UK (COG-UK) Consortium                                                                               | Thushan de Silva, Matthew Parker, Nikki Smith, Adri Angyal, Rebecca Brown, Luke Green, Rachel Tucker, Paul Parsons, Danielle Groves, Katie Johnson, Laura Carrilero, Alex Keeley, Dave Partridge, Matthew Wyles, Benjamin Lindsey, Mehmet Yavuz, Mohammad Raza, Cariad Evans                                                                                                                                                                                                                    |
| EPI_ISL_1050875, EPI_ISL_1050881, EPI_ISL_1050882                                                                                                                                                                                                                                                                                                                                                                                                                                                                                                                                                                                                                                     | Centre for Enzyme Innovation, University of Portsmouth / Translational Research Laboratory, Portsmouth Hospitals NHS Trust                                                       | COVID-19 Genomics UK (COG-UK) Consortium                                                                               | Angela Beckett, Salman Goudarzi, Christopher Fearn, Kate Cook, Katie Loveson, Sharon Glaysheer, Scott Elliott, Samuel Robson                                                                                                                                                                                                                                                                                                                                                                    |
| EPI_ISL_1050884, EPI_ISL_1050885, EPI_ISL_1050886, EPI_ISL_1050899, EPI_ISL_1050903, EPI_ISL_1050907                                                                                                                                                                                                                                                                                                                                                                                                                                                                                                                                                                                  | Virology Department, Sheffield Teaching Hospitals NHS Foundation Trust/Department of Infection, Immunity and Cardiovascular Disease, The Medical School, University of Sheffield | COVID-19 Genomics UK (COG-UK) Consortium                                                                               | Thushan de Silva, Matthew Parker, Nikki Smith, Adri Angyal, Rebecca Brown, Luke Green, Rachel Tucker, Paul Parsons, Danielle Groves, Katie Johnson, Laura Carrilero, Alex Keeley, Dave Partridge, Matthew Wyles, Benjamin Lindsey, Mehmet Yavuz, Mohammad Raza, Cariad Evans                                                                                                                                                                                                                    |







|                                                                                                                                                                                                                                                                                                 |                                                                                                                                        |                                                                                                                                        |                                                                                                                                                                                                               |
|-------------------------------------------------------------------------------------------------------------------------------------------------------------------------------------------------------------------------------------------------------------------------------------------------|----------------------------------------------------------------------------------------------------------------------------------------|----------------------------------------------------------------------------------------------------------------------------------------|---------------------------------------------------------------------------------------------------------------------------------------------------------------------------------------------------------------|
| EPI_ISL_1059926                                                                                                                                                                                                                                                                                 |                                                                                                                                        |                                                                                                                                        | F.                                                                                                                                                                                                            |
| EPI_ISL_1059927, EPI_ISL_1059928, EPI_ISL_1059929, EPI_ISL_1059930, EPI_ISL_1059931, EPI_ISL_1059932, EPI_ISL_1059933                                                                                                                                                                           | HOSPITAL GENERAL UNIVERSITARIO SANTA LUCIA                                                                                             | Instituto de Salud Carlos III                                                                                                          | Iglesias-Caballero, M. Sandonís,V. Vázquez-Morón, S. Camarero, S. Pozo, F. Casas, I. Jiménez, P. Zaballos, A. Monzón, S. Varona, S. Cuesta, I. Blázquez, A.                                                   |
| EPI_ISL_1059934, EPI_ISL_1059935                                                                                                                                                                                                                                                                | HOSPITAL DE MERIDA - SERVICIO DE CONTABILIDAD - C.D.02                                                                                 | Instituto de Salud Carlos III                                                                                                          | Iglesias-Caballero, M. Sandonís,V. Vázquez-Morón, S. Camarero, S. Pozo, F. Casas, I. Jiménez, P. Zaballos, A. Monzón, S. Varona, S. Cuesta, I. Sánchez, J.                                                    |
| EPI_ISL_1059936                                                                                                                                                                                                                                                                                 | HOSPITAL UNIV. MIGUEL SERVET                                                                                                           | Instituto de Salud Carlos III                                                                                                          | Iglesias-Caballero, M. Sandonís,V. Vázquez-Morón, S. Camarero, S. Pozo, F. Casas, I. Jiménez, P. Zaballos, A. Monzón, S. Varona, S. Cuesta, I. Martínez, A.                                                   |
| EPI_ISL_1059937                                                                                                                                                                                                                                                                                 | HOSPITAL DE LA VEGA LORENZO GUIRAO                                                                                                     | Instituto de Salud Carlos III                                                                                                          | Iglesias-Caballero, M. Sandonís,V. Vázquez-Morón, S. Camarero, S. Pozo, F. Casas, I. Jiménez, P. Zaballos, A. Monzón, S. Varona, S. Cuesta, I. Álvarez, J.                                                    |
| EPI_ISL_1059938, EPI_ISL_1059939, EPI_ISL_1059940                                                                                                                                                                                                                                               | HOSPITAL J.M. MORALES MESEGUER                                                                                                         | Instituto de Salud Carlos III                                                                                                          | Iglesias-Caballero, M. Sandonís,V. Vázquez-Morón, S. Camarero, S. Pozo, F. Casas, I. Jiménez, P. Zaballos, A. Monzón, S. Varona, S. Cuesta, I. Antequera, P.                                                  |
| EPI_ISL_1059952                                                                                                                                                                                                                                                                                 | HOSPITAL J.M. MORALES MESEGUER                                                                                                         | Instituto de Salud Carlos III                                                                                                          | Sandonís,V. Vázquez-Morón, S. Iglesias-Caballero, M. Camarero, S. Pozo, F. Casas, I. Jiménez, P. Zaballos, A. Monzón, S. Varona, S. Cuesta, I. Antequera, P.                                                  |
| EPI_ISL_1059965                                                                                                                                                                                                                                                                                 | HOSPITAL J.M. MORALES MESEGUER                                                                                                         | Instituto de Salud Carlos III                                                                                                          | Vázquez-Morón,S. Iglesias-Caballero, M. Sandonís,V. Camarero, S. Pozo, F. Casas, I. Jiménez, P. Zaballos, A. Monzón, S. Varona, S. Cuesta, I. Antequera, P.                                                   |
| EPI_ISL_1059976, EPI_ISL_1059977                                                                                                                                                                                                                                                                | HOSPITAL COMARCAL DE MELILLA                                                                                                           | Instituto de Salud Carlos III                                                                                                          | Iglesias-Caballero, M. Sandonís,V. Vázquez-Morón, S. Camarero, S. Pozo, F. Casas, I. Jiménez, P. Zaballos, A. Monzón, S. Varona, S. Cuesta, I. Román, S.                                                      |
| EPI_ISL_1059978, EPI_ISL_1059979                                                                                                                                                                                                                                                                | HOSPITAL UNIV. MIGUEL SERVET                                                                                                           | Instituto de Salud Carlos III                                                                                                          | Iglesias-Caballero, M. Sandonís,V. Vázquez-Morón, S. Camarero, S. Pozo, F. Casas, I. Jiménez, P. Zaballos, A. Monzón, S. Varona, S. Cuesta, I. Milagro, A. M.                                                 |
| EPI_ISL_1059991                                                                                                                                                                                                                                                                                 | HOSPITAL UNIVERSITARIO DE CEUTA                                                                                                        | Instituto de Salud Carlos III                                                                                                          | Sandonís,V. Vázquez-Morón, S. Iglesias-Caballero, M. Camarero, S. Pozo, F. Casas, I. Jiménez, P. Zaballos, A. Monzón, S. Varona, S. Cuesta, I. López, J.                                                      |
| EPI_ISL_1059993, EPI_ISL_1059994, EPI_ISL_1059995                                                                                                                                                                                                                                               | HOSPITAL J.M. MORALES MESEGUER                                                                                                         | Instituto de Salud Carlos III                                                                                                          | Sandonís,V. Vázquez-Morón, S. Iglesias-Caballero, M. Camarero, S. Pozo, F. Casas, I. Jiménez, P. Zaballos, A. Monzón, S. Varona, S. Cuesta, I. Antequera, P.                                                  |
| EPI_ISL_1060000, EPI_ISL_1060008                                                                                                                                                                                                                                                                | HOSPITAL UNIV. MIGUEL SERVET                                                                                                           | Instituto de Salud Carlos III                                                                                                          | Iglesias-Caballero, M. Sandonís,V. Vázquez-Morón, S. Camarero, S. Pozo, F. Casas, I. Jiménez, P. Zaballos, A. Monzón, S. Varona, S. Cuesta, I. Milagro, A. M.                                                 |
| EPI_ISL_1060022, EPI_ISL_1060023, EPI_ISL_1060024, EPI_ISL_1060027, EPI_ISL_1060034, EPI_ISL_1060035, EPI_ISL_1060037, EPI_ISL_1060038, EPI_ISL_1060039                                                                                                                                         | Wyoming Public Health Laboratory                                                                                                       | Wyoming Public Health Laboratory                                                                                                       | Jim Mildenberger, Wanda Manley, Noah Hull, Taylor Fearing, Lynette Gumbleton, Channing Weber, Ashley Norberg, Chayse Rowley, Marley Goetz, Brian Dominguez, Elliot Thomasson, Cari Sloma, and Rob Christensen |
| EPI_ISL_1060249, EPI_ISL_1060250                                                                                                                                                                                                                                                                | Laboratorio de Microbiología, Hospital Marina Baixa, Villajoyosa                                                                       | SeqCOVID-SPAIN consortium/IBV(CSIC)                                                                                                    | Mónica Parra Grande, Francisco José Arjona Zaragozaí, Carmen Martínez Peinado and SeqCOVID-SPAIN consortium                                                                                                   |
| EPI_ISL_1060252, EPI_ISL_1060254, EPI_ISL_1060256, EPI_ISL_1060260                                                                                                                                                                                                                              | Laboratorio Echevarne S.A.                                                                                                             | SeqCOVID-SPAIN consortium/IBV(CSIC)                                                                                                    | Raúl Santamaría Merino, Beatriz Fernández Forner and SeqCOVID-SPAIN consortium                                                                                                                                |
| EPI_ISL_1060264, EPI_ISL_1060268                                                                                                                                                                                                                                                                | Laboratorio de Microbiología, Hospital Marina Baixa, Villajoyosa                                                                       | SeqCOVID-SPAIN consortium/IBV(CSIC)                                                                                                    | Mónica Parra Grande, Francisco José Arjona Zaragozaí, Carmen Martínez Peinado and SeqCOVID-SPAIN consortium                                                                                                   |
| EPI_ISL_1060292                                                                                                                                                                                                                                                                                 | Laboratorio de Microbiología. Hospital General Universitario de Eida, Alicante                                                         | SeqCOVID-SPAIN consortium/IBV(CSIC)                                                                                                    | Mª Isabel Gascón Ros, Cristina Torregrosa Hetland, Eva Pastor Boix, Paloma Cascales Ramos and SeqCOVID-SPAIN consortium                                                                                       |
| EPI_ISL_1060313, EPI_ISL_1060315, EPI_ISL_1060319, EPI_ISL_1060320, EPI_ISL_1060321, EPI_ISL_1060322, EPI_ISL_1060324, EPI_ISL_1060325, EPI_ISL_1060327, EPI_ISL_1060328, EPI_ISL_1060329, EPI_ISL_1060330, EPI_ISL_1060332                                                                     |                                                                                                                                        |                                                                                                                                        |                                                                                                                                                                                                               |
| see above                                                                                                                                                                                                                                                                                       | Wyoming Public Health Laboratory                                                                                                       | Wyoming Public Health Laboratory                                                                                                       | Jim Mildenberger, Wanda Manley, Noah Hull, Taylor Fearing, Lynette Gumbleton, Channing Weber, Ashley Norberg, Chayse Rowley, Marley Goetz, Brian Dominguez, Elliot Thomasson, Cari Sloma, and Rob Christensen |
| EPI_ISL_1060338                                                                                                                                                                                                                                                                                 | Hopital                                                                                                                                | National Reference Center for Viruses of Respiratory Infections, Institut Pasteur, Paris                                               | Marion Barbet, Sylvie Behillil, Méline Bizard, Angela Brisebarre, Camille Capel, Etienne Simon-Lorière, Vincent Enouf, Maud Vanpeene, Sylvie van der Werf,Delepine Alain                                      |
| EPI_ISL_1060381, EPI_ISL_1060382                                                                                                                                                                                                                                                                | Hopital                                                                                                                                | National Reference Center for Viruses of Respiratory Infections, Institut Pasteur, Paris                                               | Marion Barbet, Sylvie Behillil, Méline Bizard, Angela Brisebarre, Camille Capel, Etienne Simon-Lorière, Vincent Enouf, Maud Vanpeene, Sylvie van der Werf, Guinoiseau Thibault                                |
| EPI_ISL_1060501, EPI_ISL_1060502                                                                                                                                                                                                                                                                | Servicio de Microbiología. Hospital Clínico Universitario de Valencia                                                                  | SeqCOVID-SPAIN consortium/IBV(CSIC)                                                                                                    | David Navarro Ortega, Eliseo Albert Vicent, Ignacio Torres and SeqCOVID-SPAIN consortium                                                                                                                      |
| EPI_ISL_1060570, EPI_ISL_1060577, EPI_ISL_1060589                                                                                                                                                                                                                                               | Outre mer                                                                                                                              | National Reference Center for Viruses of Respiratory Infections, Institut Pasteur, Paris                                               | Marion Barbet, Sylvie Behillil, Méline Bizard, Angela Brisebarre, Camille Capel, Etienne Simon-Lorière, Vincent Enouf, Maud Vanpeene, Sylvie van der Werf, Rousset Dominique                                  |
| EPI_ISL_1060597                                                                                                                                                                                                                                                                                 | Cerballiance Vauréal                                                                                                                   | Cerba                                                                                                                                  | Lecorche E, Olivi M, Benazra M, Haim-Boukobza S, Trombert-Paolantoni S, Roquebert B                                                                                                                           |
| EPI_ISL_1060865                                                                                                                                                                                                                                                                                 | Utah Public Health Laboratory                                                                                                          | Utah Public Health Laboratory                                                                                                          | Erin L. Young, Kelly F. Oakeson, Tara Gallagher                                                                                                                                                               |
| EPI_ISL_1061277, EPI_ISL_1061278                                                                                                                                                                                                                                                                | Institute of Hematology and Transfusion Medicine                                                                                       | Laboratory of Recombinant Vaccines                                                                                                     | Lukasz Rabalski, Maciej Kosinski, Natalia Mazur-Panasiuk, Aneta Kopacz, Krzysztof Pyr, Bogusław Szewczyk, Krystyna Bienkowska-Szewczyk                                                                        |
| EPI_ISL_1061308                                                                                                                                                                                                                                                                                 | Alaska State Virology Laboratory                                                                                                       | Alaska State Virology Laboratory                                                                                                       | Stephanie DeRonde, Lisa Smith, Ph.D., Jack Chen, Ph.D.                                                                                                                                                        |
| EPI_ISL_1062936                                                                                                                                                                                                                                                                                 | genXone SA, Molecular Diagnostics Laboratory / NZOZ                                                                                    | genXone SA, Research & Development Laboratory                                                                                          | Maciej Sykulski, Grzegorz Nowicki, Jakub Grabowski, Natalia Drwska-Matelska, Anna Brylak-Baszków, Aleksandra Gidlewicz, Karol Szeszko, ukasz Krych, Micha Kaszuba                                             |
| EPI_ISL_1063595, EPI_ISL_1063598, EPI_ISL_1063610, EPI_ISL_1063617, EPI_ISL_1063700, EPI_ISL_1063706, EPI_ISL_1063707, EPI_ISL_1063710, EPI_ISL_1063715, EPI_ISL_1063719, EPI_ISL_1063721, EPI_ISL_1063722, EPI_ISL_1063724, EPI_ISL_1063725, EPI_ISL_1063727, EPI_ISL_1063736, EPI_ISL_1063738 |                                                                                                                                        |                                                                                                                                        |                                                                                                                                                                                                               |
| see above                                                                                                                                                                                                                                                                                       | Division of Emerging Infectious Diseases, Bureau of Infectious Diseases Diagnosis Control, Korea Disease Control and Prevention Agency | Division of Emerging Infectious Diseases, Bureau of Infectious Diseases Diagnosis Control, Korea Disease Control and Prevention Agency | Ae Kyung Park, Il-Hwan Kim, Heui Man Kim, Jeong-Min Kim, Namjoo Lee, Chaeyoung Lee, Sang Hee Woo, Eun-Jin Kim                                                                                                 |
| EPI_ISL_1063806                                                                                                                                                                                                                                                                                 | Molecular Laboratory, Vikash Multispeciality Hospital, Bargarh                                                                         | Immunogenomics lab, Institute of Life Sciences, Bhubaneswar                                                                            | Sunil K. Raghav, Safal Walia, Arup Ghosh, Atimukta Jha, Amol M. Kanampalliwar, Shifu Aggarwal, Kirtal Hansdah, Rupesh Dash, Rajeeb Swain, Punit Prasad, INSACOG Consortium, Ajay Parida                       |
| EPI_ISL_1063812, EPI_ISL_1063815                                                                                                                                                                                                                                                                | Immunogenomics lab, Institute of Life Sciences, Bhubaneswar                                                                            | Immunogenomics lab, Institute of Life Sciences, Bhubaneswar                                                                            | Sunil K. Raghav, Safal Walia, Arup Ghosh, Atimukta Jha, Amol M. Kanampalliwar, Shifu Aggarwal, Kirtal Hansdah, Rupesh Dash, Rajeeb Swain, Punit Prasad, INSACOG Consortium, Ajay Parida                       |
| EPI_ISL_1063854                                                                                                                                                                                                                                                                                 | inDNA Life Sciences Private Limited, Bhubaneswar                                                                                       | Immunogenomics lab, Institute of Life Sciences, Bhubaneswar                                                                            | Sunil K. Raghav, Safal Walia, Arup Ghosh, Atimukta Jha, Amol M. Kanampalliwar, Shifu Aggarwal, Kirtal Hansdah, Rupesh Dash, Rajeeb Swain, Punit Prasad, INSACOG Consortium, Ajay Parida                       |
| EPI_ISL_1063857, EPI_ISL_1063859, EPI_ISL_1063860, EPI_ISL_1063861                                                                                                                                                                                                                              | Molecular Laboratory, Vikash Multispeciality Hospital, Bargarh                                                                         | Immunogenomics lab, Institute of Life Sciences, Bhubaneswar                                                                            | Sunil K. Raghav, Safal Walia, Arup Ghosh, Atimukta Jha, Amol M. Kanampalliwar, Shifu Aggarwal, Kirtal Hansdah, Rupesh Dash, Rajeeb Swain, Punit Prasad, INSACOG Consortium, Ajay Parida                       |
| EPI_ISL_1063877                                                                                                                                                                                                                                                                                 | Immunogenomics lab, Institute of Life Sciences, Bhubaneswar                                                                            | Immunogenomics lab, Institute of Life Sciences, Bhubaneswar                                                                            | Sunil K. Raghav, Safal Walia, Arup Ghosh, Atimukta Jha, Amol M. Kanampalliwar, Shifu Aggarwal, Kirtal Hansdah, Rupesh Dash, Rajeeb Swain, Punit                                                               |

|                                                                                                                                                                                                                                                                                                                                                                                                                                                                                                                                                                                                                                                                                                                                                                                                                                                                                                                                                                                                                                                                                                                                                                                                                                                                                                                                                                                                                                                                                                                                                                                                                                                                                                                                                                                                                                                                                                                                                                                                                                                                                                                                                                                                                                                                                                                                                                                                                                                                                                                                                                                                                                                                                                                                                            |                                                                                                          |                                                                                     |                                                                                                                                                                                                                                                                 |  |
|------------------------------------------------------------------------------------------------------------------------------------------------------------------------------------------------------------------------------------------------------------------------------------------------------------------------------------------------------------------------------------------------------------------------------------------------------------------------------------------------------------------------------------------------------------------------------------------------------------------------------------------------------------------------------------------------------------------------------------------------------------------------------------------------------------------------------------------------------------------------------------------------------------------------------------------------------------------------------------------------------------------------------------------------------------------------------------------------------------------------------------------------------------------------------------------------------------------------------------------------------------------------------------------------------------------------------------------------------------------------------------------------------------------------------------------------------------------------------------------------------------------------------------------------------------------------------------------------------------------------------------------------------------------------------------------------------------------------------------------------------------------------------------------------------------------------------------------------------------------------------------------------------------------------------------------------------------------------------------------------------------------------------------------------------------------------------------------------------------------------------------------------------------------------------------------------------------------------------------------------------------------------------------------------------------------------------------------------------------------------------------------------------------------------------------------------------------------------------------------------------------------------------------------------------------------------------------------------------------------------------------------------------------------------------------------------------------------------------------------------------------|----------------------------------------------------------------------------------------------------------|-------------------------------------------------------------------------------------|-----------------------------------------------------------------------------------------------------------------------------------------------------------------------------------------------------------------------------------------------------------------|--|
| EPI_ISL_1063913, EPI_ISL_1063914                                                                                                                                                                                                                                                                                                                                                                                                                                                                                                                                                                                                                                                                                                                                                                                                                                                                                                                                                                                                                                                                                                                                                                                                                                                                                                                                                                                                                                                                                                                                                                                                                                                                                                                                                                                                                                                                                                                                                                                                                                                                                                                                                                                                                                                                                                                                                                                                                                                                                                                                                                                                                                                                                                                           | Ohio Department of Health Laboratory                                                                     | Ohio Department of Health Laboratory                                                | Prasad, INSACOG Consortium, Ajay Parida                                                                                                                                                                                                                         |  |
|                                                                                                                                                                                                                                                                                                                                                                                                                                                                                                                                                                                                                                                                                                                                                                                                                                                                                                                                                                                                                                                                                                                                                                                                                                                                                                                                                                                                                                                                                                                                                                                                                                                                                                                                                                                                                                                                                                                                                                                                                                                                                                                                                                                                                                                                                                                                                                                                                                                                                                                                                                                                                                                                                                                                                            |                                                                                                          |                                                                                     | Holmes, Jennifer; Eric Brandt, Keoni Omura, Glen McGilivray, Caitlin McDonnell, Jade Mowery, Stephanie Mccracken, Tyler Payne, Kirtana Ramadugu, Erica Leasure, Brent Lee, Kelsey Florek, Heather Blankenship, Allison Black, Quanta Brown, and Tammy Bannerman |  |
| EPI_ISL_1063962, EPI_ISL_1063980                                                                                                                                                                                                                                                                                                                                                                                                                                                                                                                                                                                                                                                                                                                                                                                                                                                                                                                                                                                                                                                                                                                                                                                                                                                                                                                                                                                                                                                                                                                                                                                                                                                                                                                                                                                                                                                                                                                                                                                                                                                                                                                                                                                                                                                                                                                                                                                                                                                                                                                                                                                                                                                                                                                           | Ministry of Health Turkey                                                                                | Ministry of Health Turkey                                                           | Fatma Bayrakdar, Yasemin Cogun, Süleyman Yalcin, Aye Baak Alta, Gülay Korukluolu                                                                                                                                                                                |  |
| EPI_ISL_1063987, EPI_ISL_1063997, EPI_ISL_1064017                                                                                                                                                                                                                                                                                                                                                                                                                                                                                                                                                                                                                                                                                                                                                                                                                                                                                                                                                                                                                                                                                                                                                                                                                                                                                                                                                                                                                                                                                                                                                                                                                                                                                                                                                                                                                                                                                                                                                                                                                                                                                                                                                                                                                                                                                                                                                                                                                                                                                                                                                                                                                                                                                                          | Ohio Department of Health Laboratory                                                                     | Ohio Department of Health Laboratory                                                | Holmes, Jennifer; Eric Brandt, Keoni Omura, Glen McGilivray, Caitlin McDonnell, Jade Mowery, Stephanie Mccracken, Tyler Payne, Kirtana Ramadugu, Erica Leasure, Brent Lee, Kelsey Florek, Heather Blankenship, Allison Black, Quanta Brown, and Tammy Bannerman |  |
| EPI_ISL_1064177                                                                                                                                                                                                                                                                                                                                                                                                                                                                                                                                                                                                                                                                                                                                                                                                                                                                                                                                                                                                                                                                                                                                                                                                                                                                                                                                                                                                                                                                                                                                                                                                                                                                                                                                                                                                                                                                                                                                                                                                                                                                                                                                                                                                                                                                                                                                                                                                                                                                                                                                                                                                                                                                                                                                            | Arizona State Public Health Laboratory                                                                   | Arizona State Public Health Laboratory                                              | Trung Huynh, Jessica Escobar, Katherine Fullerton, Nobuko Fukushima, Stacy White, Linda Getsinger, Victor Waddell                                                                                                                                               |  |
| EPI_ISL_1064206, EPI_ISL_1064208, EPI_ISL_1064211, EPI_ISL_1064214, EPI_ISL_1064215, EPI_ISL_1064218, EPI_ISL_1064224, EPI_ISL_1064227, EPI_ISL_1064231, EPI_ISL_1064235                                                                                                                                                                                                                                                                                                                                                                                                                                                                                                                                                                                                                                                                                                                                                                                                                                                                                                                                                                                                                                                                                                                                                                                                                                                                                                                                                                                                                                                                                                                                                                                                                                                                                                                                                                                                                                                                                                                                                                                                                                                                                                                                                                                                                                                                                                                                                                                                                                                                                                                                                                                   | New Mexico Department of Health Scientific Laboratory                                                    | Center for Global Health, University of New Mexico Health Sciences Center           | Daryl Domman, Kurt Schwalm, Twila Kunde, Joseph Hicks, Anastacia Griego, Michael Edwards, Darrell Dinwiddie                                                                                                                                                     |  |
| EPI_ISL_1064268                                                                                                                                                                                                                                                                                                                                                                                                                                                                                                                                                                                                                                                                                                                                                                                                                                                                                                                                                                                                                                                                                                                                                                                                                                                                                                                                                                                                                                                                                                                                                                                                                                                                                                                                                                                                                                                                                                                                                                                                                                                                                                                                                                                                                                                                                                                                                                                                                                                                                                                                                                                                                                                                                                                                            | University of Wisconsin-Madison AIDS Vaccine Research Laboratories                                       | University of Wisconsin-Madison AIDS Vaccine Research Laboratories                  | Gage Moreno, Katarina Braun, et al. AIDS Vaccine Research Laboratories                                                                                                                                                                                          |  |
| EPI_ISL_1064348, EPI_ISL_1064349, EPI_ISL_1064350, EPI_ISL_1064351, EPI_ISL_1064352, EPI_ISL_1064353, EPI_ISL_1064354, EPI_ISL_1064358                                                                                                                                                                                                                                                                                                                                                                                                                                                                                                                                                                                                                                                                                                                                                                                                                                                                                                                                                                                                                                                                                                                                                                                                                                                                                                                                                                                                                                                                                                                                                                                                                                                                                                                                                                                                                                                                                                                                                                                                                                                                                                                                                                                                                                                                                                                                                                                                                                                                                                                                                                                                                     | Maryland Public Health Laboratory                                                                        | Maryland Public Health Laboratory                                                   | Maryland Department of Health Laboratories Administration                                                                                                                                                                                                       |  |
| EPI_ISL_1064482, EPI_ISL_1064483, EPI_ISL_1064484, EPI_ISL_1064485, EPI_ISL_1064486, EPI_ISL_1064487, EPI_ISL_1064488, EPI_ISL_1064489, EPI_ISL_1064490                                                                                                                                                                                                                                                                                                                                                                                                                                                                                                                                                                                                                                                                                                                                                                                                                                                                                                                                                                                                                                                                                                                                                                                                                                                                                                                                                                                                                                                                                                                                                                                                                                                                                                                                                                                                                                                                                                                                                                                                                                                                                                                                                                                                                                                                                                                                                                                                                                                                                                                                                                                                    | KU Leuven, Rega Institute, Clinical and Epidemiological Virology                                         | KU Leuven, Rega Institute, Clinical and Epidemiological Virology                    | Tony Wawina-Bokalanga, Bert Vanmechelen, Joan Marti-Carerras, Piet Maes                                                                                                                                                                                         |  |
| EPI_ISL_1064555                                                                                                                                                                                                                                                                                                                                                                                                                                                                                                                                                                                                                                                                                                                                                                                                                                                                                                                                                                                                                                                                                                                                                                                                                                                                                                                                                                                                                                                                                                                                                                                                                                                                                                                                                                                                                                                                                                                                                                                                                                                                                                                                                                                                                                                                                                                                                                                                                                                                                                                                                                                                                                                                                                                                            | Omtanken Grimmered                                                                                       | The Public Health Agency of Sweden                                                  | Oskar Karlsson Lindsjo, Maria Lind Karlberg, Carlo Berg, Anna-Malin Linde, Sofia Stamouli, Samuel Ohman, Reza Advani, Mattias Haukland, Petra Holmstrom, Noura Walai, Petra Edquist, Mia Brytting, Anna Risberg, Karin Tegmark-Wisell                           |  |
| EPI_ISL_1064557, EPI_ISL_1064559, EPI_ISL_1064561, EPI_ISL_1064562, EPI_ISL_1064563, EPI_ISL_1064564, EPI_ISL_1064565, EPI_ISL_1064567, EPI_ISL_1064568, EPI_ISL_1064571, EPI_ISL_1064572                                                                                                                                                                                                                                                                                                                                                                                                                                                                                                                                                                                                                                                                                                                                                                                                                                                                                                                                                                                                                                                                                                                                                                                                                                                                                                                                                                                                                                                                                                                                                                                                                                                                                                                                                                                                                                                                                                                                                                                                                                                                                                                                                                                                                                                                                                                                                                                                                                                                                                                                                                  |                                                                                                          |                                                                                     |                                                                                                                                                                                                                                                                 |  |
| see above                                                                                                                                                                                                                                                                                                                                                                                                                                                                                                                                                                                                                                                                                                                                                                                                                                                                                                                                                                                                                                                                                                                                                                                                                                                                                                                                                                                                                                                                                                                                                                                                                                                                                                                                                                                                                                                                                                                                                                                                                                                                                                                                                                                                                                                                                                                                                                                                                                                                                                                                                                                                                                                                                                                                                  | Klinisk mikrobiologi                                                                                     | The Public Health Agency of Sweden                                                  | Oskar Karlsson Lindsjo, Maria Lind Karlberg, Carlo Berg, Anna-Malin Linde, Sofia Stamouli, Samuel Ohman, Reza Advani, Mattias Haukland, Petra Holmstrom, Noura Walai, Petra Edquist, Mia Brytting, Anna Risberg, Karin Tegmark-Wisell                           |  |
| EPI_ISL_1064576, EPI_ISL_1064578, EPI_ISL_1064579                                                                                                                                                                                                                                                                                                                                                                                                                                                                                                                                                                                                                                                                                                                                                                                                                                                                                                                                                                                                                                                                                                                                                                                                                                                                                                                                                                                                                                                                                                                                                                                                                                                                                                                                                                                                                                                                                                                                                                                                                                                                                                                                                                                                                                                                                                                                                                                                                                                                                                                                                                                                                                                                                                          | Klinisk Mikrobiologi                                                                                     | The Public Health Agency of Sweden                                                  | Oskar Karlsson Lindsjo, Maria Lind Karlberg, Carlo Berg, Anna-Malin Linde, Sofia Stamouli, Samuel Ohman, Reza Advani, Mattias Haukland, Petra Holmstrom, Noura Walai, Petra Edquist, Mia Brytting, Anna Risberg, Karin Tegmark-Wisell                           |  |
| EPI_ISL_1064590                                                                                                                                                                                                                                                                                                                                                                                                                                                                                                                                                                                                                                                                                                                                                                                                                                                                                                                                                                                                                                                                                                                                                                                                                                                                                                                                                                                                                                                                                                                                                                                                                                                                                                                                                                                                                                                                                                                                                                                                                                                                                                                                                                                                                                                                                                                                                                                                                                                                                                                                                                                                                                                                                                                                            | Klinisk mikrobiologi                                                                                     | The Public Health Agency of Sweden                                                  | Oskar Karlsson Lindsjo, Maria Lind Karlberg, Carlo Berg, Anna-Malin Linde, Sofia Stamouli, Samuel Ohman, Reza Advani, Mattias Haukland, Petra Holmstrom, Noura Walai, Petra Edquist, Mia Brytting, Anna Risberg, Karin Tegmark-Wisell                           |  |
| EPI_ISL_1064607                                                                                                                                                                                                                                                                                                                                                                                                                                                                                                                                                                                                                                                                                                                                                                                                                                                                                                                                                                                                                                                                                                                                                                                                                                                                                                                                                                                                                                                                                                                                                                                                                                                                                                                                                                                                                                                                                                                                                                                                                                                                                                                                                                                                                                                                                                                                                                                                                                                                                                                                                                                                                                                                                                                                            | Dynamic Code AB                                                                                          | The Public Health Agency of Sweden                                                  | Oskar Karlsson Lindsjo, Maria Lind Karlberg, Carlo Berg, Anna-Malin Linde, Sofia Stamouli, Samuel Ohman, Reza Advani, Mattias Haukland, Petra Holmstrom, Noura Walai, Petra Edquist, Mia Brytting, Anna Risberg, Karin Tegmark-Wisell                           |  |
| EPI_ISL_1064608, EPI_ISL_1064611, EPI_ISL_1064612                                                                                                                                                                                                                                                                                                                                                                                                                                                                                                                                                                                                                                                                                                                                                                                                                                                                                                                                                                                                                                                                                                                                                                                                                                                                                                                                                                                                                                                                                                                                                                                                                                                                                                                                                                                                                                                                                                                                                                                                                                                                                                                                                                                                                                                                                                                                                                                                                                                                                                                                                                                                                                                                                                          | NPC                                                                                                      | The Public Health Agency of Sweden                                                  | Oskar Karlsson Lindsjo, Maria Lind Karlberg, Carlo Berg, Anna-Malin Linde, Sofia Stamouli, Samuel Ohman, Reza Advani, Mattias Haukland, Petra Holmstrom, Noura Walai, Petra Edquist, Mia Brytting, Anna Risberg, Karin Tegmark-Wisell                           |  |
| EPI_ISL_1064613, EPI_ISL_1064614, EPI_ISL_1064616, EPI_ISL_1064618, EPI_ISL_1064619                                                                                                                                                                                                                                                                                                                                                                                                                                                                                                                                                                                                                                                                                                                                                                                                                                                                                                                                                                                                                                                                                                                                                                                                                                                                                                                                                                                                                                                                                                                                                                                                                                                                                                                                                                                                                                                                                                                                                                                                                                                                                                                                                                                                                                                                                                                                                                                                                                                                                                                                                                                                                                                                        | Dynamic Code AB                                                                                          | The Public Health Agency of Sweden                                                  | Oskar Karlsson Lindsjo, Maria Lind Karlberg, Carlo Berg, Anna-Malin Linde, Sofia Stamouli, Samuel Ohman, Reza Advani, Mattias Haukland, Petra Holmstrom, Noura Walai, Petra Edquist, Mia Brytting, Anna Risberg, Karin Tegmark-Wisell                           |  |
| EPI_ISL_1064624, EPI_ISL_1064626, EPI_ISL_1064627, EPI_ISL_1064628, EPI_ISL_1064636, EPI_ISL_1064638, EPI_ISL_1064639, EPI_ISL_1064642, EPI_ISL_1064643, EPI_ISL_1064655                                                                                                                                                                                                                                                                                                                                                                                                                                                                                                                                                                                                                                                                                                                                                                                                                                                                                                                                                                                                                                                                                                                                                                                                                                                                                                                                                                                                                                                                                                                                                                                                                                                                                                                                                                                                                                                                                                                                                                                                                                                                                                                                                                                                                                                                                                                                                                                                                                                                                                                                                                                   | Klinisk mikrobiologi                                                                                     | The Public Health Agency of Sweden                                                  | Oskar Karlsson Lindsjo, Maria Lind Karlberg, Carlo Berg, Anna-Malin Linde, Sofia Stamouli, Samuel Ohman, Reza Advani, Mattias Haukland, Petra Holmstrom, Noura Walai, Petra Edquist, Mia Brytting, Anna Risberg, Karin Tegmark-Wisell                           |  |
| EPI_ISL_1064926, EPI_ISL_1064927                                                                                                                                                                                                                                                                                                                                                                                                                                                                                                                                                                                                                                                                                                                                                                                                                                                                                                                                                                                                                                                                                                                                                                                                                                                                                                                                                                                                                                                                                                                                                                                                                                                                                                                                                                                                                                                                                                                                                                                                                                                                                                                                                                                                                                                                                                                                                                                                                                                                                                                                                                                                                                                                                                                           | Univeristy of New Mexico Hospital                                                                        | Center for Global Health, University of New Mexico Health Sciences Center           | Daryl Domman, Kurt Schwalm, Justin Bacca, Jon Femling, Darrell Dinwiddie                                                                                                                                                                                        |  |
| EPI_ISL_1064928, EPI_ISL_1064929, EPI_ISL_1064930, EPI_ISL_1064933, EPI_ISL_1064934, EPI_ISL_1064936, EPI_ISL_1064937, EPI_ISL_1064938, EPI_ISL_1064940, EPI_ISL_1064941, EPI_ISL_1064942, EPI_ISL_1064944, EPI_ISL_1064945, EPI_ISL_1064948, EPI_ISL_1064949                                                                                                                                                                                                                                                                                                                                                                                                                                                                                                                                                                                                                                                                                                                                                                                                                                                                                                                                                                                                                                                                                                                                                                                                                                                                                                                                                                                                                                                                                                                                                                                                                                                                                                                                                                                                                                                                                                                                                                                                                                                                                                                                                                                                                                                                                                                                                                                                                                                                                              |                                                                                                          |                                                                                     |                                                                                                                                                                                                                                                                 |  |
| see above                                                                                                                                                                                                                                                                                                                                                                                                                                                                                                                                                                                                                                                                                                                                                                                                                                                                                                                                                                                                                                                                                                                                                                                                                                                                                                                                                                                                                                                                                                                                                                                                                                                                                                                                                                                                                                                                                                                                                                                                                                                                                                                                                                                                                                                                                                                                                                                                                                                                                                                                                                                                                                                                                                                                                  | New Mexico Department of Health Scientific Laboratory                                                    | Center for Global Health, University of New Mexico Health Sciences Center           | Daryl Domman, Kurt Schwalm, Twila Kunde, Joseph Hicks, Anastacia Griego, Michael Edwards, Darrell Dinwiddie                                                                                                                                                     |  |
| EPI_ISL_1064957, EPI_ISL_1064960, EPI_ISL_1064961, EPI_ISL_1064962, EPI_ISL_1064963, EPI_ISL_1064964, EPI_ISL_1064966, EPI_ISL_1064967, EPI_ISL_1064968, EPI_ISL_1064969, EPI_ISL_1064970, EPI_ISL_1064973, EPI_ISL_1064974, EPI_ISL_1064975, EPI_ISL_1064976, EPI_ISL_1064981, EPI_ISL_1064982, EPI_ISL_1064983                                                                                                                                                                                                                                                                                                                                                                                                                                                                                                                                                                                                                                                                                                                                                                                                                                                                                                                                                                                                                                                                                                                                                                                                                                                                                                                                                                                                                                                                                                                                                                                                                                                                                                                                                                                                                                                                                                                                                                                                                                                                                                                                                                                                                                                                                                                                                                                                                                           |                                                                                                          |                                                                                     |                                                                                                                                                                                                                                                                 |  |
| see above                                                                                                                                                                                                                                                                                                                                                                                                                                                                                                                                                                                                                                                                                                                                                                                                                                                                                                                                                                                                                                                                                                                                                                                                                                                                                                                                                                                                                                                                                                                                                                                                                                                                                                                                                                                                                                                                                                                                                                                                                                                                                                                                                                                                                                                                                                                                                                                                                                                                                                                                                                                                                                                                                                                                                  | Univeristy of New Mexico Hospital                                                                        | Center for Global Health, University of New Mexico Health Sciences Center           | Daryl Domman, Kurt Schwalm, Justin Bacca, Jon Femling, Darrell Dinwiddie                                                                                                                                                                                        |  |
| EPI_ISL_1065095, EPI_ISL_1065113, EPI_ISL_1065135, EPI_ISL_1065143, EPI_ISL_1065161, EPI_ISL_1065170, EPI_ISL_1065185, EPI_ISL_1065219, EPI_ISL_1065227, EPI_ISL_1065238, EPI_ISL_1065241, EPI_ISL_1065269, EPI_ISL_1065274, EPI_ISL_1065276, EPI_ISL_1065299, EPI_ISL_1065303, EPI_ISL_1065305, EPI_ISL_1065316, EPI_ISL_1065320, EPI_ISL_1065321, EPI_ISL_1065333, EPI_ISL_1065410, EPI_ISL_1065480, EPI_ISL_1065498, EPI_ISL_1065499, EPI_ISL_1065511, EPI_ISL_1065518, EPI_ISL_1065524, EPI_ISL_1065525, EPI_ISL_1065570, EPI_ISL_1065588, EPI_ISL_1065596, EPI_ISL_1065615, EPI_ISL_1065637, EPI_ISL_1065654, EPI_ISL_1065688, EPI_ISL_1065741, EPI_ISL_1065743, EPI_ISL_1065751, EPI_ISL_1065767, EPI_ISL_1065802, EPI_ISL_1065811, EPI_ISL_1065828, EPI_ISL_1065830, EPI_ISL_1065859, EPI_ISL_1065888, EPI_ISL_1065898, EPI_ISL_1065919, EPI_ISL_1065937, EPI_ISL_1065960, EPI_ISL_1065974, EPI_ISL_1065999, EPI_ISL_1066009, EPI_ISL_1066010, EPI_ISL_1066019, EPI_ISL_1066025, EPI_ISL_1066040, EPI_ISL_1066048, EPI_ISL_1066066, EPI_ISL_1066074, EPI_ISL_1066080, EPI_ISL_1066087, EPI_ISL_1066099, EPI_ISL_1066129, EPI_ISL_1066140, EPI_ISL_1066141, EPI_ISL_1066158, EPI_ISL_1066159, EPI_ISL_1066183, EPI_ISL_1066184, EPI_ISL_1066188, EPI_ISL_1066191, EPI_ISL_1066192, EPI_ISL_1066194, EPI_ISL_1066205, EPI_ISL_1066208, EPI_ISL_1066210, EPI_ISL_1066239, EPI_ISL_1066242, EPI_ISL_1066243, EPI_ISL_1066245, EPI_ISL_1066250, EPI_ISL_1066285, EPI_ISL_1066304, EPI_ISL_1066324, EPI_ISL_1066339, EPI_ISL_1066344, EPI_ISL_1066346, EPI_ISL_1066374, EPI_ISL_1066375, EPI_ISL_1066432, EPI_ISL_1066436, EPI_ISL_1066437, EPI_ISL_1066467, EPI_ISL_1066480, EPI_ISL_1066494, EPI_ISL_1066496, EPI_ISL_1066516, EPI_ISL_1066528, EPI_ISL_1066572, EPI_ISL_1066576, EPI_ISL_1066606, EPI_ISL_1066629, EPI_ISL_1066630, EPI_ISL_1066633, EPI_ISL_1066659, EPI_ISL_1066676, EPI_ISL_1066685, EPI_ISL_1066698, EPI_ISL_1066708, EPI_ISL_1066730, EPI_ISL_1066740, EPI_ISL_1066754, EPI_ISL_1066761, EPI_ISL_1066832, EPI_ISL_1066866, EPI_ISL_1066875, EPI_ISL_1066876, EPI_ISL_1066901, EPI_ISL_1066954, EPI_ISL_1066978, EPI_ISL_1066988, EPI_ISL_1066997, EPI_ISL_1067012, EPI_ISL_1067048, EPI_ISL_1067057, EPI_ISL_1067092, EPI_ISL_1067098, EPI_ISL_1067105, EPI_ISL_1067136, EPI_ISL_1067166, EPI_ISL_1067187, EPI_ISL_1067195, EPI_ISL_1067203, EPI_ISL_1067214, EPI_ISL_1067242, EPI_ISL_1067248, EPI_ISL_1067254, EPI_ISL_1067259, EPI_ISL_1067278, EPI_ISL_1067306, EPI_ISL_1067361, EPI_ISL_1067362, EPI_ISL_1067376, EPI_ISL_1067389, EPI_ISL_1067397, EPI_ISL_1067413, EPI_ISL_1067422, EPI_ISL_1067436, EPI_ISL_1067452, EPI_ISL_1067458, EPI_ISL_1067459, EPI_ISL_1067482, EPI_ISL_1067514, EPI_ISL_1067526, EPI_ISL_1067552 |                                                                                                          |                                                                                     |                                                                                                                                                                                                                                                                 |  |
| see above                                                                                                                                                                                                                                                                                                                                                                                                                                                                                                                                                                                                                                                                                                                                                                                                                                                                                                                                                                                                                                                                                                                                                                                                                                                                                                                                                                                                                                                                                                                                                                                                                                                                                                                                                                                                                                                                                                                                                                                                                                                                                                                                                                                                                                                                                                                                                                                                                                                                                                                                                                                                                                                                                                                                                  | Department of Virus and Microbiological Special Diagnostics, Statens Serum Institut, Copenhagen, Denmark | Aalborg University                                                                  | Danish Covid-19 Genome Consortium                                                                                                                                                                                                                               |  |
| EPI_ISL_1067588                                                                                                                                                                                                                                                                                                                                                                                                                                                                                                                                                                                                                                                                                                                                                                                                                                                                                                                                                                                                                                                                                                                                                                                                                                                                                                                                                                                                                                                                                                                                                                                                                                                                                                                                                                                                                                                                                                                                                                                                                                                                                                                                                                                                                                                                                                                                                                                                                                                                                                                                                                                                                                                                                                                                            | AREA DE SALUD BUENOS AIRES                                                                               | Incienza, Instituto Costarricense de Investigación y Enseñanza en Nutrición y Salud | Francisco Duarte, Hebleen Porras, Claudio Soto-Garita, Estela Cordero, Adriana Godínez, Melany Calderón & Mariel López                                                                                                                                          |  |
| EPI_ISL_1067589                                                                                                                                                                                                                                                                                                                                                                                                                                                                                                                                                                                                                                                                                                                                                                                                                                                                                                                                                                                                                                                                                                                                                                                                                                                                                                                                                                                                                                                                                                                                                                                                                                                                                                                                                                                                                                                                                                                                                                                                                                                                                                                                                                                                                                                                                                                                                                                                                                                                                                                                                                                                                                                                                                                                            | HOSPITAL DR. FERNANDO ESCALANTE PRADILLA                                                                 | Incienza, Instituto Costarricense de Investigación y Enseñanza en Nutrición y Salud | Francisco Duarte, Hebleen Porras, Claudio Soto-Garita, Estela Cordero, Adriana Godínez, Melany Calderón, Caterina Guzmán, Nazareth Ruiz & Nicole Vargas-Viquez                                                                                                  |  |
| EPI_ISL_1067603                                                                                                                                                                                                                                                                                                                                                                                                                                                                                                                                                                                                                                                                                                                                                                                                                                                                                                                                                                                                                                                                                                                                                                                                                                                                                                                                                                                                                                                                                                                                                                                                                                                                                                                                                                                                                                                                                                                                                                                                                                                                                                                                                                                                                                                                                                                                                                                                                                                                                                                                                                                                                                                                                                                                            | AREA DE SALUD GOICOECHEA 2 - CLINICA DR. JIMENEZ NUNEZ                                                   | Incienza, Instituto Costarricense de Investigación y Enseñanza en Nutrición y Salud | Francisco Duarte, Hebleen Porras, Claudio Soto-Garita, Estela Cordero, Adriana Godínez, Melany Calderón & Mariel López                                                                                                                                          |  |
| EPI_ISL_1067607                                                                                                                                                                                                                                                                                                                                                                                                                                                                                                                                                                                                                                                                                                                                                                                                                                                                                                                                                                                                                                                                                                                                                                                                                                                                                                                                                                                                                                                                                                                                                                                                                                                                                                                                                                                                                                                                                                                                                                                                                                                                                                                                                                                                                                                                                                                                                                                                                                                                                                                                                                                                                                                                                                                                            | AREA DE SALUD ZAPOTE-CATEDRAL - CLINICA DR. CARLOS DURAN                                                 | Incienza, Instituto Costarricense de Investigación y Enseñanza en Nutrición y Salud | Francisco Duarte, Hebleen Porras, Claudio Soto-Garita, Estela Cordero, Adriana Godínez, Melany Calderón, Caterina Guzmán, Nazareth Ruiz & Nicole Vargas-Viquez                                                                                                  |  |

|                                                                                                                                                                                                                                                                                                                                                                                                                                                                                                                                                                                                                                                                                                                                                                                                                                                                                                                                                                                                                                                                                                                                                                                                                                                                                                                                                                                                                                                                                                                                                                                                                                                                                                                                                                                                                                                                                                                                                                                                                                                                                                                                                                                                                                                                                                                                                                                                                                                                                                                                                                                                                                                                                                                                                                                                                                                                                   |                                                                                                                                |                                                                                                                                |                                                                                                                                                                                                                                                                                                                                |
|-----------------------------------------------------------------------------------------------------------------------------------------------------------------------------------------------------------------------------------------------------------------------------------------------------------------------------------------------------------------------------------------------------------------------------------------------------------------------------------------------------------------------------------------------------------------------------------------------------------------------------------------------------------------------------------------------------------------------------------------------------------------------------------------------------------------------------------------------------------------------------------------------------------------------------------------------------------------------------------------------------------------------------------------------------------------------------------------------------------------------------------------------------------------------------------------------------------------------------------------------------------------------------------------------------------------------------------------------------------------------------------------------------------------------------------------------------------------------------------------------------------------------------------------------------------------------------------------------------------------------------------------------------------------------------------------------------------------------------------------------------------------------------------------------------------------------------------------------------------------------------------------------------------------------------------------------------------------------------------------------------------------------------------------------------------------------------------------------------------------------------------------------------------------------------------------------------------------------------------------------------------------------------------------------------------------------------------------------------------------------------------------------------------------------------------------------------------------------------------------------------------------------------------------------------------------------------------------------------------------------------------------------------------------------------------------------------------------------------------------------------------------------------------------------------------------------------------------------------------------------------------|--------------------------------------------------------------------------------------------------------------------------------|--------------------------------------------------------------------------------------------------------------------------------|--------------------------------------------------------------------------------------------------------------------------------------------------------------------------------------------------------------------------------------------------------------------------------------------------------------------------------|
| EPI_ISL_1067608                                                                                                                                                                                                                                                                                                                                                                                                                                                                                                                                                                                                                                                                                                                                                                                                                                                                                                                                                                                                                                                                                                                                                                                                                                                                                                                                                                                                                                                                                                                                                                                                                                                                                                                                                                                                                                                                                                                                                                                                                                                                                                                                                                                                                                                                                                                                                                                                                                                                                                                                                                                                                                                                                                                                                                                                                                                                   | unknown                                                                                                                        | Incienza, Instituto Costarricense de Investigación y Enseñanza en Nutrición y Salud                                            | Francisco Duarte, Hebleen Porras, Claudio Soto-Garita, Estela Cordero, Adriana Godínez, Melany Calderón, Caterina Guzmán, Nazareth Ruiz & Adriana Bermúdez-Espinoza                                                                                                                                                            |
| EPI_ISL_1067609                                                                                                                                                                                                                                                                                                                                                                                                                                                                                                                                                                                                                                                                                                                                                                                                                                                                                                                                                                                                                                                                                                                                                                                                                                                                                                                                                                                                                                                                                                                                                                                                                                                                                                                                                                                                                                                                                                                                                                                                                                                                                                                                                                                                                                                                                                                                                                                                                                                                                                                                                                                                                                                                                                                                                                                                                                                                   | AREA DE SALUD ALAJUELA NORTE - CLINICA DR. MARCIAL RODRIGUEZ                                                                   | Incienza, Instituto Costarricense de Investigación y Enseñanza en Nutrición y Salud                                            | Francisco Duarte, Hebleen Porras, Claudio Soto-Garita, Estela Cordero, Adriana Godínez, Melany Calderón & Mariel López                                                                                                                                                                                                         |
| EPI_ISL_1067611                                                                                                                                                                                                                                                                                                                                                                                                                                                                                                                                                                                                                                                                                                                                                                                                                                                                                                                                                                                                                                                                                                                                                                                                                                                                                                                                                                                                                                                                                                                                                                                                                                                                                                                                                                                                                                                                                                                                                                                                                                                                                                                                                                                                                                                                                                                                                                                                                                                                                                                                                                                                                                                                                                                                                                                                                                                                   | HOSPITAL DR. ENRIQUE BALTODANO BRICEÑO                                                                                         | Incienza, Instituto Costarricense de Investigación y Enseñanza en Nutrición y Salud                                            | Francisco Duarte, Hebleen Porras, Claudio Soto-Garita, Estela Cordero, Adriana Godínez, Melany Calderón, Caterina Guzmán, Nazareth Ruiz & Mariel López                                                                                                                                                                         |
| EPI_ISL_1067612                                                                                                                                                                                                                                                                                                                                                                                                                                                                                                                                                                                                                                                                                                                                                                                                                                                                                                                                                                                                                                                                                                                                                                                                                                                                                                                                                                                                                                                                                                                                                                                                                                                                                                                                                                                                                                                                                                                                                                                                                                                                                                                                                                                                                                                                                                                                                                                                                                                                                                                                                                                                                                                                                                                                                                                                                                                                   | AREA DE SALUD ZAPOTE-CATEDRAL - CLINICA DR. CARLOS DURAN                                                                       | Incienza, Instituto Costarricense de Investigación y Enseñanza en Nutrición y Salud                                            | Francisco Duarte, Hebleen Porras, Claudio Soto-Garita, Estela Cordero, Adriana Godínez, Melany Calderón, Caterina Guzmán, Nazareth Ruiz & Melissa Carazo-Gutiérrez                                                                                                                                                             |
| EPI_ISL_1067613, EPI_ISL_1067614                                                                                                                                                                                                                                                                                                                                                                                                                                                                                                                                                                                                                                                                                                                                                                                                                                                                                                                                                                                                                                                                                                                                                                                                                                                                                                                                                                                                                                                                                                                                                                                                                                                                                                                                                                                                                                                                                                                                                                                                                                                                                                                                                                                                                                                                                                                                                                                                                                                                                                                                                                                                                                                                                                                                                                                                                                                  | HOSPITAL MEXICO                                                                                                                | Incienza, Instituto Costarricense de Investigación y Enseñanza en Nutrición y Salud                                            | Francisco Duarte, Hebleen Porras, Claudio Soto-Garita, Estela Cordero, Adriana Godínez, Melany Calderón, Caterina Guzmán, Nazareth Ruiz & Teresita Somogyi                                                                                                                                                                     |
| EPI_ISL_1067617                                                                                                                                                                                                                                                                                                                                                                                                                                                                                                                                                                                                                                                                                                                                                                                                                                                                                                                                                                                                                                                                                                                                                                                                                                                                                                                                                                                                                                                                                                                                                                                                                                                                                                                                                                                                                                                                                                                                                                                                                                                                                                                                                                                                                                                                                                                                                                                                                                                                                                                                                                                                                                                                                                                                                                                                                                                                   | AREA DE SALUD GOICOECHEA 2 - CLINICA DR. JIMENEZ NUÑEZ                                                                         | Incienza, Instituto Costarricense de Investigación y Enseñanza en Nutrición y Salud                                            | Francisco Duarte, Hebleen Porras, Claudio Soto-Garita, Estela Cordero, Adriana Godínez, Melany Calderón & Mariel López                                                                                                                                                                                                         |
| EPI_ISL_1067618                                                                                                                                                                                                                                                                                                                                                                                                                                                                                                                                                                                                                                                                                                                                                                                                                                                                                                                                                                                                                                                                                                                                                                                                                                                                                                                                                                                                                                                                                                                                                                                                                                                                                                                                                                                                                                                                                                                                                                                                                                                                                                                                                                                                                                                                                                                                                                                                                                                                                                                                                                                                                                                                                                                                                                                                                                                                   | AREA DE SALUD CORRALILLO                                                                                                       | Incienza, Instituto Costarricense de Investigación y Enseñanza en Nutrición y Salud                                            | Francisco Duarte, Hebleen Porras, Claudio Soto-Garita, Estela Cordero, Adriana Godínez, Melany Calderón, Caterina Guzmán, Nazareth Ruiz & Mónica Charpentier-Artavia                                                                                                                                                           |
| EPI_ISL_1067619                                                                                                                                                                                                                                                                                                                                                                                                                                                                                                                                                                                                                                                                                                                                                                                                                                                                                                                                                                                                                                                                                                                                                                                                                                                                                                                                                                                                                                                                                                                                                                                                                                                                                                                                                                                                                                                                                                                                                                                                                                                                                                                                                                                                                                                                                                                                                                                                                                                                                                                                                                                                                                                                                                                                                                                                                                                                   | AREA DE SALUD MATA REDONDA-HOSPITAL - CLINICA DR. MORENO CAÑAS [SAN JOSE/SAN JOSE]                                             | Incienza, Instituto Costarricense de Investigación y Enseñanza en Nutrición y Salud                                            | Francisco Duarte, Hebleen Porras, Claudio Soto-Garita, Estela Cordero, Adriana Godínez, Melany Calderón, Caterina Guzmán, Nazareth Ruiz & Nicole Vargas-Viquez                                                                                                                                                                 |
| EPI_ISL_1067620                                                                                                                                                                                                                                                                                                                                                                                                                                                                                                                                                                                                                                                                                                                                                                                                                                                                                                                                                                                                                                                                                                                                                                                                                                                                                                                                                                                                                                                                                                                                                                                                                                                                                                                                                                                                                                                                                                                                                                                                                                                                                                                                                                                                                                                                                                                                                                                                                                                                                                                                                                                                                                                                                                                                                                                                                                                                   | LABORATORIO CLINICO LABIN                                                                                                      | Incienza, Instituto Costarricense de Investigación y Enseñanza en Nutrición y Salud                                            | Francisco Duarte, Hebleen Porras, Claudio Soto-Garita, Estela Cordero, Adriana Godínez, Melany Calderón, Caterina Guzmán, Nazareth Ruiz & Pei Ling Chan Ma                                                                                                                                                                     |
| EPI_ISL_1067621                                                                                                                                                                                                                                                                                                                                                                                                                                                                                                                                                                                                                                                                                                                                                                                                                                                                                                                                                                                                                                                                                                                                                                                                                                                                                                                                                                                                                                                                                                                                                                                                                                                                                                                                                                                                                                                                                                                                                                                                                                                                                                                                                                                                                                                                                                                                                                                                                                                                                                                                                                                                                                                                                                                                                                                                                                                                   | AREA DE SALUD LA CRUZ                                                                                                          | Incienza, Instituto Costarricense de Investigación y Enseñanza en Nutrición y Salud                                            | Francisco Duarte, Hebleen Porras, Claudio Soto-Garita, Estela Cordero, Adriana Godínez, Melany Calderón, Caterina Guzmán, Nazareth Ruiz & Ivanna Krize-Morún                                                                                                                                                                   |
| EPI_ISL_1067622                                                                                                                                                                                                                                                                                                                                                                                                                                                                                                                                                                                                                                                                                                                                                                                                                                                                                                                                                                                                                                                                                                                                                                                                                                                                                                                                                                                                                                                                                                                                                                                                                                                                                                                                                                                                                                                                                                                                                                                                                                                                                                                                                                                                                                                                                                                                                                                                                                                                                                                                                                                                                                                                                                                                                                                                                                                                   | AREA DE SALUD PAVAS (COOPESALUD)                                                                                               | Incienza, Instituto Costarricense de Investigación y Enseñanza en Nutrición y Salud                                            | Francisco Duarte, Hebleen Porras, Claudio Soto-Garita, Estela Cordero, Adriana Godínez, Melany Calderón, Caterina Guzmán, Nazareth Ruiz & Melissa Carazo-Gutiérrez                                                                                                                                                             |
| EPI_ISL_1067623, EPI_ISL_1067624, EPI_ISL_1067625                                                                                                                                                                                                                                                                                                                                                                                                                                                                                                                                                                                                                                                                                                                                                                                                                                                                                                                                                                                                                                                                                                                                                                                                                                                                                                                                                                                                                                                                                                                                                                                                                                                                                                                                                                                                                                                                                                                                                                                                                                                                                                                                                                                                                                                                                                                                                                                                                                                                                                                                                                                                                                                                                                                                                                                                                                 | HOSPITAL MEXICO                                                                                                                | Incienza, Instituto Costarricense de Investigación y Enseñanza en Nutrición y Salud                                            | Francisco Duarte, Hebleen Porras, Claudio Soto-Garita, Estela Cordero, Adriana Godínez, Melany Calderón, Caterina Guzmán, Nazareth Ruiz & Teresita Somogyi                                                                                                                                                                     |
| EPI_ISL_1067728                                                                                                                                                                                                                                                                                                                                                                                                                                                                                                                                                                                                                                                                                                                                                                                                                                                                                                                                                                                                                                                                                                                                                                                                                                                                                                                                                                                                                                                                                                                                                                                                                                                                                                                                                                                                                                                                                                                                                                                                                                                                                                                                                                                                                                                                                                                                                                                                                                                                                                                                                                                                                                                                                                                                                                                                                                                                   | Center for Biotechnology and Cell Therapy, São Rafael Hospital, Salvador, Brazil                                               | Central Public Health Laboratory - LACEN -Bahia, Salvador, Brazil                                                              | Stephane Tosta, Luciana Oliveira, Vanessa Nardy,Patricia Cajado,Marcela Gómez, Breno Dominguez, Jaqueline Gomes, Vagner Fonseca,Marta Giovanetti,Luiz Alcantara, Felicidade Pereira, Arabela Leal                                                                                                                              |
| EPI_ISL_1067731, EPI_ISL_1067733                                                                                                                                                                                                                                                                                                                                                                                                                                                                                                                                                                                                                                                                                                                                                                                                                                                                                                                                                                                                                                                                                                                                                                                                                                                                                                                                                                                                                                                                                                                                                                                                                                                                                                                                                                                                                                                                                                                                                                                                                                                                                                                                                                                                                                                                                                                                                                                                                                                                                                                                                                                                                                                                                                                                                                                                                                                  | Central Public Health Laboratory - LACEN -Bahia, Salvador, Brazil                                                              | Central Public Health Laboratory - LACEN -Bahia, Salvador, Brazil                                                              | Stephane Tosta, Luciana Oliveira, Vanessa Nardy,Patricia Cajado,Marcela Gómez, Breno Dominguez, Jaqueline Gomes, Vagner Fonseca,Marta Giovanetti,Luiz Alcantara, Felicidade Pereira, Arabela Leal                                                                                                                              |
| EPI_ISL_1067736                                                                                                                                                                                                                                                                                                                                                                                                                                                                                                                                                                                                                                                                                                                                                                                                                                                                                                                                                                                                                                                                                                                                                                                                                                                                                                                                                                                                                                                                                                                                                                                                                                                                                                                                                                                                                                                                                                                                                                                                                                                                                                                                                                                                                                                                                                                                                                                                                                                                                                                                                                                                                                                                                                                                                                                                                                                                   | Center for Biotechnology and Cell Therapy, São Rafael Hospital, Salvador, Brazil                                               | Central Public Health Laboratory - LACEN -Bahia, Salvador, Brazil                                                              | Stephane Tosta, Luciana Oliveira, Vanessa Nardy,Patricia Cajado,Marcela Gómez, Breno Dominguez, Jaqueline Gomes, Vagner Fonseca,Marta Giovanetti,Luiz Alcantara, Felicidade Pereira, Arabela Leal                                                                                                                              |
| EPI_ISL_1067738                                                                                                                                                                                                                                                                                                                                                                                                                                                                                                                                                                                                                                                                                                                                                                                                                                                                                                                                                                                                                                                                                                                                                                                                                                                                                                                                                                                                                                                                                                                                                                                                                                                                                                                                                                                                                                                                                                                                                                                                                                                                                                                                                                                                                                                                                                                                                                                                                                                                                                                                                                                                                                                                                                                                                                                                                                                                   | Central Public Health Laboratory - LACEN -Bahia, Salvador, Brazil                                                              | Central Public Health Laboratory - LACEN -Bahia, Salvador, Brazil                                                              | Stephane Tosta, Luciana Oliveira, Vanessa Nardy,Patricia Cajado,Marcela Gómez, Breno Dominguez, Jaqueline Gomes, Vagner Fonseca,Marta Giovanetti,Luiz Alcantara, Felicidade Pereira, Arabela Leal                                                                                                                              |
| EPI_ISL_1067812                                                                                                                                                                                                                                                                                                                                                                                                                                                                                                                                                                                                                                                                                                                                                                                                                                                                                                                                                                                                                                                                                                                                                                                                                                                                                                                                                                                                                                                                                                                                                                                                                                                                                                                                                                                                                                                                                                                                                                                                                                                                                                                                                                                                                                                                                                                                                                                                                                                                                                                                                                                                                                                                                                                                                                                                                                                                   | Broad Institute Clinical Research Sequencing Platform                                                                          | Infectious Disease Program, Broad Institute of Harvard and MIT                                                                 | Lemieux,J.E., Siddle,K.J., Adams,G., Gladden-Young,A., Lagerborg,K., Rudy,M., DeRuff,K., Carter,A., Normandin,E., Bauer,M., Reilly,S., Tomkins-Tinch,C., Loreth,C., Chaluvadi,S., Birren,B.W., Gallagher,G., Smole,S., Park,D.J., MacInnis,B.L., and Sabeti,P.C.                                                               |
| EPI_ISL_1067820, EPI_ISL_1067824, EPI_ISL_1067825, EPI_ISL_1067827, EPI_ISL_1067828, EPI_ISL_1067829, EPI_ISL_1067869, EPI_ISL_1067870, EPI_ISL_1067872, EPI_ISL_1067873, EPI_ISL_1067874, EPI_ISL_1067878, EPI_ISL_1067879, EPI_ISL_1067881, EPI_ISL_1067882, EPI_ISL_1067883, EPI_ISL_1067886, EPI_ISL_1067887, EPI_ISL_1067888, EPI_ISL_1067890, EPI_ISL_1067892, EPI_ISL_1067893                                                                                                                                                                                                                                                                                                                                                                                                                                                                                                                                                                                                                                                                                                                                                                                                                                                                                                                                                                                                                                                                                                                                                                                                                                                                                                                                                                                                                                                                                                                                                                                                                                                                                                                                                                                                                                                                                                                                                                                                                                                                                                                                                                                                                                                                                                                                                                                                                                                                                              |                                                                                                                                |                                                                                                                                |                                                                                                                                                                                                                                                                                                                                |
| see above                                                                                                                                                                                                                                                                                                                                                                                                                                                                                                                                                                                                                                                                                                                                                                                                                                                                                                                                                                                                                                                                                                                                                                                                                                                                                                                                                                                                                                                                                                                                                                                                                                                                                                                                                                                                                                                                                                                                                                                                                                                                                                                                                                                                                                                                                                                                                                                                                                                                                                                                                                                                                                                                                                                                                                                                                                                                         | Wisconsin State Laboratory of Hygiene Communicable Disease Division                                                            | Wisconsin State Laboratory of Hygiene Communicable Disease Division                                                            | Kelsey R. Florek, Abigail C. Shockey                                                                                                                                                                                                                                                                                           |
| EPI_ISL_1068021, EPI_ISL_1068023                                                                                                                                                                                                                                                                                                                                                                                                                                                                                                                                                                                                                                                                                                                                                                                                                                                                                                                                                                                                                                                                                                                                                                                                                                                                                                                                                                                                                                                                                                                                                                                                                                                                                                                                                                                                                                                                                                                                                                                                                                                                                                                                                                                                                                                                                                                                                                                                                                                                                                                                                                                                                                                                                                                                                                                                                                                  | Clinical Molecular Microbiology Laboratory, UNC Hospital                                                                       | Dirk Dittmer                                                                                                                   | Justin T. Landis , Razia Moorad , Brent A. Eason, Melissa B. Miller, Linda Pluta, Dirk Dittmer, Angelica Juarez, Cecilia Thompson, Shawn Hawken, Cameron Grant, Evelyn Hoffman, Patricio Cano, Jason Wong, Carolina Caro-Vegas, Ryan McNamara, Blossom Damania.                                                                |
| EPI_ISL_1068259, EPI_ISL_1068265, EPI_ISL_1068277                                                                                                                                                                                                                                                                                                                                                                                                                                                                                                                                                                                                                                                                                                                                                                                                                                                                                                                                                                                                                                                                                                                                                                                                                                                                                                                                                                                                                                                                                                                                                                                                                                                                                                                                                                                                                                                                                                                                                                                                                                                                                                                                                                                                                                                                                                                                                                                                                                                                                                                                                                                                                                                                                                                                                                                                                                 | Laboratorio de Ecologia de Doencas Transmissíveis na Amazonia, Instituto Leonidas e Maria Deane - Fiocruz Amazonia             | Laboratorio de Ecologia de Doencas Transmissíveis na Amazonia, Instituto Leonidas e Maria Deane - Fiocruz Amazonia             | Valdinete Nascimento, Victor Souza, André Corado, Fernanda Nascimento, George Silva, Agatha Costa, Debora Duarte, Karina Pessoa, Matilde Mejia, Luciana Gonçalves, Maria Júlia Brandão, Michele Jesus, Felipe Naveca on behalf of the Fiocruz COVID-19 Genomic Surveillance Network                                            |
| EPI_ISL_1068293, EPI_ISL_1068294, EPI_ISL_1068295, EPI_ISL_1068297, EPI_ISL_1068302, EPI_ISL_1068303, EPI_ISL_1068304, EPI_ISL_1068306, EPI_ISL_1068307, EPI_ISL_1068308, EPI_ISL_1068309, EPI_ISL_1068310                                                                                                                                                                                                                                                                                                                                                                                                                                                                                                                                                                                                                                                                                                                                                                                                                                                                                                                                                                                                                                                                                                                                                                                                                                                                                                                                                                                                                                                                                                                                                                                                                                                                                                                                                                                                                                                                                                                                                                                                                                                                                                                                                                                                                                                                                                                                                                                                                                                                                                                                                                                                                                                                        |                                                                                                                                |                                                                                                                                |                                                                                                                                                                                                                                                                                                                                |
| see above                                                                                                                                                                                                                                                                                                                                                                                                                                                                                                                                                                                                                                                                                                                                                                                                                                                                                                                                                                                                                                                                                                                                                                                                                                                                                                                                                                                                                                                                                                                                                                                                                                                                                                                                                                                                                                                                                                                                                                                                                                                                                                                                                                                                                                                                                                                                                                                                                                                                                                                                                                                                                                                                                                                                                                                                                                                                         | Alaska State Virology Laboratory                                                                                               | Alaska State Virology Laboratory                                                                                               | Stephanie DeRonde, Lisa Smith, Ph.D., Jack Chen, Ph.D.                                                                                                                                                                                                                                                                         |
| EPI_ISL_1068368                                                                                                                                                                                                                                                                                                                                                                                                                                                                                                                                                                                                                                                                                                                                                                                                                                                                                                                                                                                                                                                                                                                                                                                                                                                                                                                                                                                                                                                                                                                                                                                                                                                                                                                                                                                                                                                                                                                                                                                                                                                                                                                                                                                                                                                                                                                                                                                                                                                                                                                                                                                                                                                                                                                                                                                                                                                                   | Central Public Health Laboratory - LACEN -Bahia, Salvador, Brazil                                                              | Central Public Health Laboratory - LACEN -Bahia, Salvador, Brazil                                                              | Stephane Tosta, Luciana Oliveira, Vanessa Nardy,Patricia Cajado,Marcela Gómez, Breno Dominguez, Jaqueline Gomes, Vagner Fonseca,Marta Giovanetti,Luiz Alcantara, Felicidade Pereira, Arabela Leal                                                                                                                              |
| EPI_ISL_1068849, EPI_ISL_1068850, EPI_ISL_1068851, EPI_ISL_1068927, EPI_ISL_1068928, EPI_ISL_1068929                                                                                                                                                                                                                                                                                                                                                                                                                                                                                                                                                                                                                                                                                                                                                                                                                                                                                                                                                                                                                                                                                                                                                                                                                                                                                                                                                                                                                                                                                                                                                                                                                                                                                                                                                                                                                                                                                                                                                                                                                                                                                                                                                                                                                                                                                                                                                                                                                                                                                                                                                                                                                                                                                                                                                                              | Institute for Medical Research, Infectious Disease Research Centre, National Institutes of Health, Ministry of Health Malaysia | Institute for Medical Research, Infectious Disease Research Centre, National Institutes of Health, Ministry of Health Malaysia | Suppiah J, Kamel K, Azizan MA, Thayan R                                                                                                                                                                                                                                                                                        |
| EPI_ISL_1068996, EPI_ISL_1068997                                                                                                                                                                                                                                                                                                                                                                                                                                                                                                                                                                                                                                                                                                                                                                                                                                                                                                                                                                                                                                                                                                                                                                                                                                                                                                                                                                                                                                                                                                                                                                                                                                                                                                                                                                                                                                                                                                                                                                                                                                                                                                                                                                                                                                                                                                                                                                                                                                                                                                                                                                                                                                                                                                                                                                                                                                                  | UCSI University                                                                                                                | Institute for Medical Research, Infectious Disease Research Centre, National Institutes of Health, Ministry of Health Malaysia | Suppiah J, Kamel K, Azizan MA, Sekaran SD, Thayan R                                                                                                                                                                                                                                                                            |
| EPI_ISL_1068998                                                                                                                                                                                                                                                                                                                                                                                                                                                                                                                                                                                                                                                                                                                                                                                                                                                                                                                                                                                                                                                                                                                                                                                                                                                                                                                                                                                                                                                                                                                                                                                                                                                                                                                                                                                                                                                                                                                                                                                                                                                                                                                                                                                                                                                                                                                                                                                                                                                                                                                                                                                                                                                                                                                                                                                                                                                                   | UCSI University                                                                                                                | Institute for Medical Research, Infectious Disease Research Centre, National Institutes of Health, Ministry of Health Malaysia | Suppiah J, Kamel K, Azizan MA, Thayan R                                                                                                                                                                                                                                                                                        |
| EPI_ISL_1068999, EPI_ISL_1069076, EPI_ISL_1069078                                                                                                                                                                                                                                                                                                                                                                                                                                                                                                                                                                                                                                                                                                                                                                                                                                                                                                                                                                                                                                                                                                                                                                                                                                                                                                                                                                                                                                                                                                                                                                                                                                                                                                                                                                                                                                                                                                                                                                                                                                                                                                                                                                                                                                                                                                                                                                                                                                                                                                                                                                                                                                                                                                                                                                                                                                 | UCSI University                                                                                                                | Institute for Medical Research, Infectious Disease Research Centre, National Institutes of Health, Ministry of Health Malaysia | Suppiah J, Kamel K, Azizan MA, Sekaran SD, Thayan R                                                                                                                                                                                                                                                                            |
| EPI_ISL_1069222, EPI_ISL_1069223, EPI_ISL_1069224, EPI_ISL_1069225, EPI_ISL_1069226, EPI_ISL_1069227, EPI_ISL_1069228, EPI_ISL_1069229, EPI_ISL_1069230, EPI_ISL_1069231, EPI_ISL_1069232, EPI_ISL_1069233, EPI_ISL_1069234, EPI_ISL_1069235, EPI_ISL_1069236, EPI_ISL_1069237, EPI_ISL_1069238, EPI_ISL_1069239, EPI_ISL_1069240, EPI_ISL_1069241, EPI_ISL_1069242, EPI_ISL_1069243, EPI_ISL_1069244, EPI_ISL_1069245, EPI_ISL_1069246, EPI_ISL_1069247, EPI_ISL_1069248, EPI_ISL_1069249, EPI_ISL_1069250, EPI_ISL_1069251, EPI_ISL_1069252, EPI_ISL_1069253, EPI_ISL_1069254, EPI_ISL_1069255, EPI_ISL_1069256, EPI_ISL_1069257, EPI_ISL_1069258, EPI_ISL_1069260, EPI_ISL_1069261, EPI_ISL_1069262, EPI_ISL_1069263, EPI_ISL_1069264, EPI_ISL_1069265, EPI_ISL_1069266, EPI_ISL_1069268, EPI_ISL_1069269, EPI_ISL_1069270, EPI_ISL_1069271, EPI_ISL_1069272, EPI_ISL_1069273, EPI_ISL_1069274, EPI_ISL_1069275, EPI_ISL_1069276, EPI_ISL_1069277, EPI_ISL_1069278, EPI_ISL_1069279, EPI_ISL_1069280, EPI_ISL_1069281, EPI_ISL_1069282, EPI_ISL_1069283, EPI_ISL_1069284, EPI_ISL_1069285, EPI_ISL_1069286, EPI_ISL_1069287, EPI_ISL_1069288, EPI_ISL_1069289, EPI_ISL_1069290, EPI_ISL_1069291, EPI_ISL_1069292, EPI_ISL_1069293, EPI_ISL_1069294, EPI_ISL_1069295, EPI_ISL_1069296, EPI_ISL_1069297, EPI_ISL_1069298, EPI_ISL_1069300, EPI_ISL_1069302, EPI_ISL_1069304, EPI_ISL_1069305, EPI_ISL_1069306, EPI_ISL_1069307, EPI_ISL_1069308, EPI_ISL_1069309, EPI_ISL_1069310, EPI_ISL_1069311, EPI_ISL_1069312, EPI_ISL_1069313, EPI_ISL_1069314, EPI_ISL_1069315, EPI_ISL_1069316, EPI_ISL_1069317, EPI_ISL_1069318, EPI_ISL_1069319, EPI_ISL_1069320, EPI_ISL_1069321, EPI_ISL_1069322, EPI_ISL_1069323, EPI_ISL_1069324, EPI_ISL_1069325, EPI_ISL_1069326, EPI_ISL_1069327, EPI_ISL_1069328, EPI_ISL_1069329, EPI_ISL_1069330, EPI_ISL_1069331, EPI_ISL_1069332, EPI_ISL_1069333, EPI_ISL_1069334, EPI_ISL_1069335, EPI_ISL_1069336, EPI_ISL_1069337, EPI_ISL_1069338, EPI_ISL_1069339, EPI_ISL_1069340, EPI_ISL_1069341, EPI_ISL_1069342, EPI_ISL_1069343, EPI_ISL_1069344, EPI_ISL_1069345, EPI_ISL_1069346, EPI_ISL_1069347, EPI_ISL_1069348, EPI_ISL_1069349, EPI_ISL_1069350, EPI_ISL_1069351, EPI_ISL_1069352, EPI_ISL_1069353, EPI_ISL_1069354, EPI_ISL_1069355, EPI_ISL_1069356, EPI_ISL_1069357, EPI_ISL_1069358, EPI_ISL_1069359, EPI_ISL_1069360, EPI_ISL_1069361, EPI_ISL_1069362, EPI_ISL_1069363, EPI_ISL_1069364, EPI_ISL_1069365, EPI_ISL_1069366, EPI_ISL_1069367, EPI_ISL_1069368, EPI_ISL_1069369, EPI_ISL_1069370, EPI_ISL_1069371, EPI_ISL_1069372, EPI_ISL_1069373, EPI_ISL_1069374, EPI_ISL_1069375, EPI_ISL_1069376, EPI_ISL_1069377, EPI_ISL_1069378, EPI_ISL_1069379, EPI_ISL_1069380, EPI_ISL_1069381, EPI_ISL_1069382, EPI_ISL_1069383, EPI_ISL_1069384, EPI_ISL_1069385, EPI_ISL_1069386, EPI_ISL_1069387, EPI_ISL_1069388, EPI_ISL_1069389 |                                                                                                                                |                                                                                                                                |                                                                                                                                                                                                                                                                                                                                |
| see above                                                                                                                                                                                                                                                                                                                                                                                                                                                                                                                                                                                                                                                                                                                                                                                                                                                                                                                                                                                                                                                                                                                                                                                                                                                                                                                                                                                                                                                                                                                                                                                                                                                                                                                                                                                                                                                                                                                                                                                                                                                                                                                                                                                                                                                                                                                                                                                                                                                                                                                                                                                                                                                                                                                                                                                                                                                                         | UW Virology Lab                                                                                                                | UW Virology Lab                                                                                                                | Pavitra Roychoudhury, Hong Xie, Lasata Shrestha, Shah Mohamed Bakhsh, Robert Livingston, Michelle Lin, Noah Baker, Meeli-Li Huang, Keith R Jerome, Alexander Greninger                                                                                                                                                         |
| EPI_ISL_1072961                                                                                                                                                                                                                                                                                                                                                                                                                                                                                                                                                                                                                                                                                                                                                                                                                                                                                                                                                                                                                                                                                                                                                                                                                                                                                                                                                                                                                                                                                                                                                                                                                                                                                                                                                                                                                                                                                                                                                                                                                                                                                                                                                                                                                                                                                                                                                                                                                                                                                                                                                                                                                                                                                                                                                                                                                                                                   | National Institute of Laboratory Medicine and Referral Center                                                                  | Genomic Research Lab, BCSIR                                                                                                    | Md. Maruf Ahmed Molla, Mohammad Samir Uzzaman, Eshrar Osman, Md. Ashashan Habib, Shahina Akter,Tanjina Akhtar Banu, Abu Sayeed Mohammad Mahmud, Md. Murshed Hasan Sarkar, Barna Goswami, Iffat Jahan, Md. Saddam Hossain, Tasnim Nafisa, Mahmuda Yeasmin, Asish Kumar Ghosh, Arifa Akram, A. K. M.Shamsuzzaman, Md. Salim Khan |

|                                                                                                                                                                                                                                                                                                                                                                                                                                                                                                                                                                                                                                                                                                                                                                                                                                                                                                                                                                                                                                                                                                                                                                                                                                                                                                                                                                                                                                                                                                                                                                                                                                                                                                                                                                                                                                                                                                                                                                                                                                                                                                                                                                                                                                                                                                                                                                                                                                                                                                                                                                                                                                                                                                                                                                                                                                                                                                                                                                                                                                                                                                                                                                                                                                                                                                                                                                                                                                                                                                                                                                                                                                                                                                                                                                                                                                                                                                                                                                                                                                                                                                                                                                                                                                                                                                                                                                                                                                                                                                                                                                                                                                                                                                                                                                                                                                                                                                                                                                                                                                                                                                                                                                                                                                                                                                                                                                                                                                                                                                                                                                                                                                                                                                                                                                                                                                                                                                                                                                                                                                                                                                                                                                                                                                                                                                                                                                                                                                                                                                                                                                                                                                                                                                                                                                                                                                  |                                                               |                                                              |                                                                                                                                                                                                                                                                                                                                                      |                                                                                                                                                                                                                                                                              |
|----------------------------------------------------------------------------------------------------------------------------------------------------------------------------------------------------------------------------------------------------------------------------------------------------------------------------------------------------------------------------------------------------------------------------------------------------------------------------------------------------------------------------------------------------------------------------------------------------------------------------------------------------------------------------------------------------------------------------------------------------------------------------------------------------------------------------------------------------------------------------------------------------------------------------------------------------------------------------------------------------------------------------------------------------------------------------------------------------------------------------------------------------------------------------------------------------------------------------------------------------------------------------------------------------------------------------------------------------------------------------------------------------------------------------------------------------------------------------------------------------------------------------------------------------------------------------------------------------------------------------------------------------------------------------------------------------------------------------------------------------------------------------------------------------------------------------------------------------------------------------------------------------------------------------------------------------------------------------------------------------------------------------------------------------------------------------------------------------------------------------------------------------------------------------------------------------------------------------------------------------------------------------------------------------------------------------------------------------------------------------------------------------------------------------------------------------------------------------------------------------------------------------------------------------------------------------------------------------------------------------------------------------------------------------------------------------------------------------------------------------------------------------------------------------------------------------------------------------------------------------------------------------------------------------------------------------------------------------------------------------------------------------------------------------------------------------------------------------------------------------------------------------------------------------------------------------------------------------------------------------------------------------------------------------------------------------------------------------------------------------------------------------------------------------------------------------------------------------------------------------------------------------------------------------------------------------------------------------------------------------------------------------------------------------------------------------------------------------------------------------------------------------------------------------------------------------------------------------------------------------------------------------------------------------------------------------------------------------------------------------------------------------------------------------------------------------------------------------------------------------------------------------------------------------------------------------------------------------------------------------------------------------------------------------------------------------------------------------------------------------------------------------------------------------------------------------------------------------------------------------------------------------------------------------------------------------------------------------------------------------------------------------------------------------------------------------------------------------------------------------------------------------------------------------------------------------------------------------------------------------------------------------------------------------------------------------------------------------------------------------------------------------------------------------------------------------------------------------------------------------------------------------------------------------------------------------------------------------------------------------------------------------------------------------------------------------------------------------------------------------------------------------------------------------------------------------------------------------------------------------------------------------------------------------------------------------------------------------------------------------------------------------------------------------------------------------------------------------------------------------------------------------------------------------------------------------------------------------------------------------------------------------------------------------------------------------------------------------------------------------------------------------------------------------------------------------------------------------------------------------------------------------------------------------------------------------------------------------------------------------------------------------------------------------------------------------------------------------------------------------------------------------------------------------------------------------------------------------------------------------------------------------------------------------------------------------------------------------------------------------------------------------------------------------------------------------------------------------------------------------------------------------------------------------------------------------------|---------------------------------------------------------------|--------------------------------------------------------------|------------------------------------------------------------------------------------------------------------------------------------------------------------------------------------------------------------------------------------------------------------------------------------------------------------------------------------------------------|------------------------------------------------------------------------------------------------------------------------------------------------------------------------------------------------------------------------------------------------------------------------------|
| EPI_ISL_1072987                                                                                                                                                                                                                                                                                                                                                                                                                                                                                                                                                                                                                                                                                                                                                                                                                                                                                                                                                                                                                                                                                                                                                                                                                                                                                                                                                                                                                                                                                                                                                                                                                                                                                                                                                                                                                                                                                                                                                                                                                                                                                                                                                                                                                                                                                                                                                                                                                                                                                                                                                                                                                                                                                                                                                                                                                                                                                                                                                                                                                                                                                                                                                                                                                                                                                                                                                                                                                                                                                                                                                                                                                                                                                                                                                                                                                                                                                                                                                                                                                                                                                                                                                                                                                                                                                                                                                                                                                                                                                                                                                                                                                                                                                                                                                                                                                                                                                                                                                                                                                                                                                                                                                                                                                                                                                                                                                                                                                                                                                                                                                                                                                                                                                                                                                                                                                                                                                                                                                                                                                                                                                                                                                                                                                                                                                                                                                                                                                                                                                                                                                                                                                                                                                                                                                                                                                  | National Institute of Laboratory Medicine and Referral Center | Genomic Research Lab, BCSIR                                  | Md. Murshed Hasan Sarkar, Mohammad Samir Uzzaman, Eshrar Osman, Md. Ahashan Habib, Shahina Akter, Tanjina Akhtar Banu, Abu Sayeed Mohammad Mahmud, Barna Goswami, Iffat Jahan, Md. Saddam Hossain, Tasnim Nafisa, Mahmuda Yeasmin, Asish Kumar Ghosh, Arifa Akram, A. K. M.Shamsuzzaman, Md. Salim Khan                                              |                                                                                                                                                                                                                                                                              |
| EPI_ISL_1073227, EPI_ISL_1073239, EPI_ISL_1073244, EPI_ISL_1073249, EPI_ISL_1073253, EPI_ISL_1073266, EPI_ISL_1073269, EPI_ISL_1073275, EPI_ISL_1073276, EPI_ISL_1073283, EPI_ISL_1073284, EPI_ISL_1073285, EPI_ISL_1073287, EPI_ISL_1073291, EPI_ISL_1073293, EPI_ISL_1073296, EPI_ISL_1073307, EPI_ISL_1073315, EPI_ISL_1073341, EPI_ISL_1073358, EPI_ISL_1073367, EPI_ISL_1073369, EPI_ISL_1073370, EPI_ISL_1073373, EPI_ISL_1073375, EPI_ISL_1073379, EPI_ISL_1073443, EPI_ISL_1073452, EPI_ISL_1073479, EPI_ISL_1073480, EPI_ISL_1073482, EPI_ISL_1073483, EPI_ISL_1073485, EPI_ISL_1073487, EPI_ISL_1073488, EPI_ISL_1073489, EPI_ISL_1073490, EPI_ISL_1073496, EPI_ISL_1073500, EPI_ISL_1073502, EPI_ISL_1073503, EPI_ISL_1073507, EPI_ISL_1073509, EPI_ISL_1073525, EPI_ISL_1073553, EPI_ISL_1073562, EPI_ISL_1073608, EPI_ISL_1073609, EPI_ISL_1073611, EPI_ISL_1073612, EPI_ISL_1073613, EPI_ISL_1073616, EPI_ISL_1073617, EPI_ISL_1073618, EPI_ISL_1073623, EPI_ISL_1073627, EPI_ISL_1073636                                                                                                                                                                                                                                                                                                                                                                                                                                                                                                                                                                                                                                                                                                                                                                                                                                                                                                                                                                                                                                                                                                                                                                                                                                                                                                                                                                                                                                                                                                                                                                                                                                                                                                                                                                                                                                                                                                                                                                                                                                                                                                                                                                                                                                                                                                                                                                                                                                                                                                                                                                                                                                                                                                                                                                                                                                                                                                                                                                                                                                                                                                                                                                                                                                                                                                                                                                                                                                                                                                                                                                                                                                                                                                                                                                                                                                                                                                                                                                                                                                                                                                                                                                                                                                                                                                                                                                                                                                                                                                                                                                                                                                                                                                                                                                                                                                                                                                                                                                                                                                                                                                                                                                                                                                                                                                                                                                                                                                                                                                                                                                                                                                                                                                                                                                                                                          | Israel Central Virology laboratory                            | Israel National Consortium for SARS-CoV-2 sequencing         | Neta Zuckerman, Efrat Dahan Bucris, Michal Mandelboim, Dana Bar-Ilan, Oran Erster, Tzvia Mann, Omer Murik, David A. Zeevi, Assaf Rokney, Joseph Jaffe, Eva Nachum, Maya Davidovich Cohen, Ephraim Fass, Gal Zizelski Valenci, Mor Rubinstein, Efrat Rorman, Israel Nissan, Efrat Glick-Saar, Omri Nayshool, Gideon Rechavi, Ella Mendelson, Orna Mor |                                                                                                                                                                                                                                                                              |
| EPI_ISL_1073736, EPI_ISL_1073737, EPI_ISL_1073738, EPI_ISL_1073739, EPI_ISL_1073740, EPI_ISL_1073742, EPI_ISL_1073743, EPI_ISL_1073744, EPI_ISL_1073745, EPI_ISL_1073746, EPI_ISL_1073747, EPI_ISL_1073754, EPI_ISL_1073759, EPI_ISL_1073760, EPI_ISL_1073762, EPI_ISL_1073763, EPI_ISL_1073764, EPI_ISL_1073765, EPI_ISL_1073766, EPI_ISL_1073767, EPI_ISL_1073769, EPI_ISL_1073770, EPI_ISL_1073785, EPI_ISL_1073788, EPI_ISL_1073789, EPI_ISL_1073790, EPI_ISL_1073791, EPI_ISL_1073792, EPI_ISL_1073796, EPI_ISL_1073799, EPI_ISL_1073800, EPI_ISL_1073801, EPI_ISL_1073802                                                                                                                                                                                                                                                                                                                                                                                                                                                                                                                                                                                                                                                                                                                                                                                                                                                                                                                                                                                                                                                                                                                                                                                                                                                                                                                                                                                                                                                                                                                                                                                                                                                                                                                                                                                                                                                                                                                                                                                                                                                                                                                                                                                                                                                                                                                                                                                                                                                                                                                                                                                                                                                                                                                                                                                                                                                                                                                                                                                                                                                                                                                                                                                                                                                                                                                                                                                                                                                                                                                                                                                                                                                                                                                                                                                                                                                                                                                                                                                                                                                                                                                                                                                                                                                                                                                                                                                                                                                                                                                                                                                                                                                                                                                                                                                                                                                                                                                                                                                                                                                                                                                                                                                                                                                                                                                                                                                                                                                                                                                                                                                                                                                                                                                                                                                                                                                                                                                                                                                                                                                                                                                                                                                                                                                  | see above                                                     | Ministry of Health Turkey                                    | Ministry of Health Turkey                                                                                                                                                                                                                                                                                                                            | Fatma Bayrakdar, Yasemin Cogun, Süleyman Yalcin, Aye Baak Alta, Gülay Korukluolu                                                                                                                                                                                             |
| EPI_ISL_1073862, EPI_ISL_1073863, EPI_ISL_1073864, EPI_ISL_1073865, EPI_ISL_1073866, EPI_ISL_1073878, EPI_ISL_1073879, EPI_ISL_1073880, EPI_ISL_1073881, EPI_ISL_1073882, EPI_ISL_1073883, EPI_ISL_1073892, EPI_ISL_1073893, EPI_ISL_1073894, EPI_ISL_1073895, EPI_ISL_1073896, EPI_ISL_1073897, EPI_ISL_1073899, EPI_ISL_1073900, EPI_ISL_1073901, EPI_ISL_1073903, EPI_ISL_1073904, EPI_ISL_1073905, EPI_ISL_1073906, EPI_ISL_1073908, EPI_ISL_1073909, EPI_ISL_1073910, EPI_ISL_1073914                                                                                                                                                                                                                                                                                                                                                                                                                                                                                                                                                                                                                                                                                                                                                                                                                                                                                                                                                                                                                                                                                                                                                                                                                                                                                                                                                                                                                                                                                                                                                                                                                                                                                                                                                                                                                                                                                                                                                                                                                                                                                                                                                                                                                                                                                                                                                                                                                                                                                                                                                                                                                                                                                                                                                                                                                                                                                                                                                                                                                                                                                                                                                                                                                                                                                                                                                                                                                                                                                                                                                                                                                                                                                                                                                                                                                                                                                                                                                                                                                                                                                                                                                                                                                                                                                                                                                                                                                                                                                                                                                                                                                                                                                                                                                                                                                                                                                                                                                                                                                                                                                                                                                                                                                                                                                                                                                                                                                                                                                                                                                                                                                                                                                                                                                                                                                                                                                                                                                                                                                                                                                                                                                                                                                                                                                                                                       | see above                                                     | Lab voor klinische biologie                                  | Lab voor klinische biologie                                                                                                                                                                                                                                                                                                                          | Marija Janevska, Hannelore Hamerlinck, Bruno Verhasselt                                                                                                                                                                                                                      |
| EPI_ISL_1073941                                                                                                                                                                                                                                                                                                                                                                                                                                                                                                                                                                                                                                                                                                                                                                                                                                                                                                                                                                                                                                                                                                                                                                                                                                                                                                                                                                                                                                                                                                                                                                                                                                                                                                                                                                                                                                                                                                                                                                                                                                                                                                                                                                                                                                                                                                                                                                                                                                                                                                                                                                                                                                                                                                                                                                                                                                                                                                                                                                                                                                                                                                                                                                                                                                                                                                                                                                                                                                                                                                                                                                                                                                                                                                                                                                                                                                                                                                                                                                                                                                                                                                                                                                                                                                                                                                                                                                                                                                                                                                                                                                                                                                                                                                                                                                                                                                                                                                                                                                                                                                                                                                                                                                                                                                                                                                                                                                                                                                                                                                                                                                                                                                                                                                                                                                                                                                                                                                                                                                                                                                                                                                                                                                                                                                                                                                                                                                                                                                                                                                                                                                                                                                                                                                                                                                                                                  | Department of Medical Microbiology, St. Olavs hospital        | Norwegian Institute of Public Health, Department of Virology | Kathrine Stene-Johansen, Kamilla Heddeland Instefjord, Hilde Elshaug, Garcia Llorente Ignacio, Engebretsen Serina Beate Atiya R Ali, Marie Paulsen Madsen, Rasmus Riis Kopperud, Hilde Vollan, Karoline Bragstad, Olav Hungnes                                                                                                                       |                                                                                                                                                                                                                                                                              |
| EPI_ISL_1074303, EPI_ISL_1074304, EPI_ISL_1074311, EPI_ISL_1074312, EPI_ISL_1074314, EPI_ISL_1074317, EPI_ISL_1074319, EPI_ISL_1074321, EPI_ISL_1074327, EPI_ISL_1074331, EPI_ISL_1074332, EPI_ISL_1074338, EPI_ISL_1074341, EPI_ISL_1074343, EPI_ISL_1074345, EPI_ISL_1074348, EPI_ISL_1074349, EPI_ISL_1074351, EPI_ISL_1074352, EPI_ISL_1074354, EPI_ISL_1074355, EPI_ISL_1074357, EPI_ISL_1074358, EPI_ISL_1074359, EPI_ISL_1074360, EPI_ISL_1074363, EPI_ISL_1074364, EPI_ISL_1074367, EPI_ISL_1074369, EPI_ISL_1074370, EPI_ISL_1074371, EPI_ISL_1074374, EPI_ISL_1074376, EPI_ISL_1074377, EPI_ISL_1074378, EPI_ISL_1074379, EPI_ISL_1074382, EPI_ISL_1074389, EPI_ISL_1074392, EPI_ISL_1074393, EPI_ISL_1074394, EPI_ISL_1074395, EPI_ISL_1074396, EPI_ISL_1074399, EPI_ISL_1074401, EPI_ISL_1074403, EPI_ISL_1074404, EPI_ISL_1074406, EPI_ISL_1074407, EPI_ISL_1074408, EPI_ISL_1074410, EPI_ISL_1074411, EPI_ISL_1074415, EPI_ISL_1074416, EPI_ISL_1074417, EPI_ISL_1074418, EPI_ISL_1074419, EPI_ISL_1074421, EPI_ISL_1074424, EPI_ISL_1074425, EPI_ISL_1074428, EPI_ISL_1074429, EPI_ISL_1074430, EPI_ISL_1074433, EPI_ISL_1074437, EPI_ISL_1074439, EPI_ISL_1074441, EPI_ISL_1074445, EPI_ISL_1074449, EPI_ISL_1074451, EPI_ISL_1074452, EPI_ISL_1074455, EPI_ISL_1074457, EPI_ISL_1074459, EPI_ISL_1074461, EPI_ISL_1074462, EPI_ISL_1074463, EPI_ISL_1074464, EPI_ISL_1074468, EPI_ISL_1074470, EPI_ISL_1074471, EPI_ISL_1074477, EPI_ISL_1074478, EPI_ISL_1074482, EPI_ISL_1074484, EPI_ISL_1074486, EPI_ISL_1074489, EPI_ISL_1074491, EPI_ISL_1074492, EPI_ISL_1074493, EPI_ISL_1074494, EPI_ISL_1074495, EPI_ISL_1074496, EPI_ISL_1074497, EPI_ISL_1074498, EPI_ISL_1074499, EPI_ISL_1074500, EPI_ISL_1074501, EPI_ISL_1074502, EPI_ISL_1074503, EPI_ISL_1074504, EPI_ISL_1074505, EPI_ISL_1074507, EPI_ISL_1074508, EPI_ISL_1074509, EPI_ISL_1074510, EPI_ISL_1074511, EPI_ISL_1074513, EPI_ISL_1074514, EPI_ISL_1074515, EPI_ISL_1074517, EPI_ISL_1074518, EPI_ISL_1074520, EPI_ISL_1074522, EPI_ISL_1074523, EPI_ISL_1074524, EPI_ISL_1074529, EPI_ISL_1074530, EPI_ISL_1074532, EPI_ISL_1074534, EPI_ISL_1074537, EPI_ISL_1074540, EPI_ISL_1074541, EPI_ISL_1074543, EPI_ISL_1074546, EPI_ISL_1074547, EPI_ISL_1074549, EPI_ISL_1074550, EPI_ISL_1074556, EPI_ISL_1074558, EPI_ISL_1074560, EPI_ISL_1074561, EPI_ISL_1074562, EPI_ISL_1074563, EPI_ISL_1074565, EPI_ISL_1074566, EPI_ISL_1074569, EPI_ISL_1074570, EPI_ISL_1074572, EPI_ISL_1074573, EPI_ISL_1074574, EPI_ISL_1074575, EPI_ISL_1074576, EPI_ISL_1074577, EPI_ISL_1074581, EPI_ISL_1074584, EPI_ISL_1074587, EPI_ISL_1074597, EPI_ISL_1074598, EPI_ISL_1074599, EPI_ISL_1074600, EPI_ISL_1074603, EPI_ISL_1074604, EPI_ISL_1074606, EPI_ISL_1074608, EPI_ISL_1074609, EPI_ISL_1074610, EPI_ISL_1074611, EPI_ISL_1074612, EPI_ISL_1074614, EPI_ISL_1074615, EPI_ISL_1074616, EPI_ISL_1074617, EPI_ISL_1074618, EPI_ISL_1074621, EPI_ISL_1074624, EPI_ISL_1074627, EPI_ISL_1074628, EPI_ISL_1074630, EPI_ISL_1074632, EPI_ISL_1074633, EPI_ISL_1074634, EPI_ISL_1074635, EPI_ISL_1074636, EPI_ISL_1074637, EPI_ISL_1074639, EPI_ISL_1074640, EPI_ISL_1074641, EPI_ISL_1074642, EPI_ISL_1074644, EPI_ISL_1074646, EPI_ISL_1074648, EPI_ISL_1074650, EPI_ISL_1074651, EPI_ISL_1074652, EPI_ISL_1074654, EPI_ISL_1074655, EPI_ISL_1074657, EPI_ISL_1074660, EPI_ISL_1074662, EPI_ISL_1074663, EPI_ISL_1074669, EPI_ISL_1074671, EPI_ISL_1074673, EPI_ISL_1074674, EPI_ISL_1074675, EPI_ISL_1074677, EPI_ISL_1074679, EPI_ISL_1074680, EPI_ISL_1074681, EPI_ISL_1074682, EPI_ISL_1074683, EPI_ISL_1074684, EPI_ISL_1074686, EPI_ISL_1074688, EPI_ISL_1074689, EPI_ISL_1074691, EPI_ISL_1074693, EPI_ISL_1074699, EPI_ISL_1074701, EPI_ISL_1074703, EPI_ISL_1074707, EPI_ISL_1074708, EPI_ISL_1074709, EPI_ISL_1074714, EPI_ISL_1074721, EPI_ISL_1074723, EPI_ISL_1074731, EPI_ISL_1074732, EPI_ISL_1074733, EPI_ISL_1074734, EPI_ISL_1074735, EPI_ISL_1074742, EPI_ISL_1074745, EPI_ISL_1074747, EPI_ISL_1074748, EPI_ISL_1074750, EPI_ISL_1074751, EPI_ISL_1074753, EPI_ISL_1074754, EPI_ISL_1074755, EPI_ISL_1074757, EPI_ISL_1074761, EPI_ISL_1074763, EPI_ISL_1074768, EPI_ISL_1074769, EPI_ISL_1074770, EPI_ISL_1074772, EPI_ISL_1074773, EPI_ISL_1074775, EPI_ISL_1074783, EPI_ISL_1074784, EPI_ISL_1074785, EPI_ISL_1074786, EPI_ISL_1074787, EPI_ISL_1074789, EPI_ISL_1074792, EPI_ISL_1074794, EPI_ISL_1074795, EPI_ISL_1074796, EPI_ISL_1074799, EPI_ISL_1074800, EPI_ISL_1074802, EPI_ISL_1074803, EPI_ISL_1074804, EPI_ISL_1074807, EPI_ISL_1074808, EPI_ISL_1074809, EPI_ISL_1074810, EPI_ISL_1074812, EPI_ISL_1074816, EPI_ISL_1074817, EPI_ISL_1074819, EPI_ISL_1074821, EPI_ISL_1074822, EPI_ISL_1074827, EPI_ISL_1074828, EPI_ISL_1074829, EPI_ISL_1074834, EPI_ISL_1074836, EPI_ISL_1074837, EPI_ISL_1074838, EPI_ISL_1074840, EPI_ISL_1074842, EPI_ISL_1074843, EPI_ISL_1074846, EPI_ISL_1074847, EPI_ISL_1074848, EPI_ISL_1074849, EPI_ISL_1074850, EPI_ISL_1074852, EPI_ISL_1074856, EPI_ISL_1074857, EPI_ISL_1074859, EPI_ISL_1074863, EPI_ISL_1074865, EPI_ISL_1074867, EPI_ISL_1074869, EPI_ISL_1074871, EPI_ISL_1074879, EPI_ISL_1074881, EPI_ISL_1074882, EPI_ISL_1074885, EPI_ISL_1074891, EPI_ISL_1074892, EPI_ISL_1074895, EPI_ISL_1074900, EPI_ISL_1074903, EPI_ISL_1074909, EPI_ISL_1074911, EPI_ISL_1074912, EPI_ISL_1074914, EPI_ISL_1074915, EPI_ISL_1074917, EPI_ISL_1074920, EPI_ISL_1074923, EPI_ISL_1074924, EPI_ISL_1074929, EPI_ISL_1074930, EPI_ISL_1074931, EPI_ISL_1074932, EPI_ISL_1074934, EPI_ISL_1074936, EPI_ISL_1074939, EPI_ISL_1074940, EPI_ISL_1074942, EPI_ISL_1074947, EPI_ISL_1074949, EPI_ISL_1074954, EPI_ISL_1074957, EPI_ISL_1074961, EPI_ISL_1074962, EPI_ISL_1074966, EPI_ISL_1074967, EPI_ISL_1074972, EPI_ISL_1074974, EPI_ISL_1074980, EPI_ISL_1074982, EPI_ISL_1074986, EPI_ISL_1074991, EPI_ISL_1074992, EPI_ISL_1074993, EPI_ISL_1074994, EPI_ISL_1074997, EPI_ISL_1074998, EPI_ISL_1074999, EPI_ISL_1075000, EPI_ISL_1075001, EPI_ISL_1075006, EPI_ISL_1075007, EPI_ISL_1075012, EPI_ISL_1075013, EPI_ISL_1075014, EPI_ISL_1075015, EPI_ISL_1075019, EPI_ISL_1075023, EPI_ISL_1075024, EPI_ISL_1075026, EPI_ISL_1075027, EPI_ISL_1075028, EPI_ISL_1075029, EPI_ISL_1075032, EPI_ISL_1075036, EPI_ISL_1075037, EPI_ISL_1075038, EPI_ISL_1075039, EPI_ISL_1075041, EPI_ISL_1075045, EPI_ISL_1075049, EPI_ISL_1075050, EPI_ISL_1075051, EPI_ISL_1075052, EPI_ISL_1075053, EPI_ISL_1075055, EPI_ISL_1075057, EPI_ISL_1075062, EPI_ISL_1075064, EPI_ISL_1075066, EPI_ISL_1075068, EPI_ISL_1075069, EPI_ISL_1075071, EPI_ISL_1075073, EPI_ISL_1075076, EPI_ISL_1075078, EPI_ISL_1075079, EPI_ISL_1075080, EPI_ISL_1075089, EPI_ISL_1075091, EPI_ISL_1075092, EPI_ISL_1075093, EPI_ISL_1075094, EPI_ISL_1075095, EPI_ISL_1075096, EPI_ISL_1075097, EPI_ISL_1075098, EPI_ISL_1075099 | see above                                                     | Houston Methodist Hospital                                   | Houston Methodist Hospital                                                                                                                                                                                                                                                                                                                           | S. Wesley Long, Randall J. Olsen, Paul A. Christensen, Sishir Subedi, Robert Olson, James J. Davis, Matthew Ojeda Saavedra, Prasanti Yerramilli, Layne Pruitt, Kristina Reppond, Madison N. Shyer, Jessica Cambric, Ilya J. Finkelstein, Jimmy Gollihar, and James M. Musser |







|                                                                                                                                                                                                                                                                                                                                                                                                                                                                                                                                                                                                                                                                                                                                                                                                                                                                                                                                                                                                                                                                                                                                                                                                                                                                                                                                                                                                                                                                                                                                                                                                                                                                                                                                                                                                                                                                                                                                                                                                                                                                                                                                                                                                                                                                                                                                                                                                                                                                                                                                                                                                                                                                                                                                                                                                                                                                                                                                                                                                                                                                                                                                                                                                                                                        |                                                                                                                |                                                                                        |                                                                                                                                                                                                                                                                                                                                                                                                                                                                                                                                                                                                                                                                                                                |
|--------------------------------------------------------------------------------------------------------------------------------------------------------------------------------------------------------------------------------------------------------------------------------------------------------------------------------------------------------------------------------------------------------------------------------------------------------------------------------------------------------------------------------------------------------------------------------------------------------------------------------------------------------------------------------------------------------------------------------------------------------------------------------------------------------------------------------------------------------------------------------------------------------------------------------------------------------------------------------------------------------------------------------------------------------------------------------------------------------------------------------------------------------------------------------------------------------------------------------------------------------------------------------------------------------------------------------------------------------------------------------------------------------------------------------------------------------------------------------------------------------------------------------------------------------------------------------------------------------------------------------------------------------------------------------------------------------------------------------------------------------------------------------------------------------------------------------------------------------------------------------------------------------------------------------------------------------------------------------------------------------------------------------------------------------------------------------------------------------------------------------------------------------------------------------------------------------------------------------------------------------------------------------------------------------------------------------------------------------------------------------------------------------------------------------------------------------------------------------------------------------------------------------------------------------------------------------------------------------------------------------------------------------------------------------------------------------------------------------------------------------------------------------------------------------------------------------------------------------------------------------------------------------------------------------------------------------------------------------------------------------------------------------------------------------------------------------------------------------------------------------------------------------------------------------------------------------------------------------------------------------|----------------------------------------------------------------------------------------------------------------|----------------------------------------------------------------------------------------|----------------------------------------------------------------------------------------------------------------------------------------------------------------------------------------------------------------------------------------------------------------------------------------------------------------------------------------------------------------------------------------------------------------------------------------------------------------------------------------------------------------------------------------------------------------------------------------------------------------------------------------------------------------------------------------------------------------|
| EPI_ISL_1081571, EPI_ISL_1081572, EPI_ISL_1081573, EPI_ISL_1081574, EPI_ISL_1081575, EPI_ISL_1081576, EPI_ISL_1081577, EPI_ISL_1081578, EPI_ISL_1081579, EPI_ISL_1081580, EPI_ISL_1081581, EPI_ISL_1081582, EPI_ISL_1081584, EPI_ISL_1081586, EPI_ISL_1081587, EPI_ISL_1081588, EPI_ISL_1081589, EPI_ISL_1081590, EPI_ISL_1081591, EPI_ISL_1081592, EPI_ISL_1081593, EPI_ISL_1081595, EPI_ISL_1081596, EPI_ISL_1081597                                                                                                                                                                                                                                                                                                                                                                                                                                                                                                                                                                                                                                                                                                                                                                                                                                                                                                                                                                                                                                                                                                                                                                                                                                                                                                                                                                                                                                                                                                                                                                                                                                                                                                                                                                                                                                                                                                                                                                                                                                                                                                                                                                                                                                                                                                                                                                                                                                                                                                                                                                                                                                                                                                                                                                                                                                 |                                                                                                                |                                                                                        |                                                                                                                                                                                                                                                                                                                                                                                                                                                                                                                                                                                                                                                                                                                |
| see above                                                                                                                                                                                                                                                                                                                                                                                                                                                                                                                                                                                                                                                                                                                                                                                                                                                                                                                                                                                                                                                                                                                                                                                                                                                                                                                                                                                                                                                                                                                                                                                                                                                                                                                                                                                                                                                                                                                                                                                                                                                                                                                                                                                                                                                                                                                                                                                                                                                                                                                                                                                                                                                                                                                                                                                                                                                                                                                                                                                                                                                                                                                                                                                                                                              | Rady's Childrens Hospital                                                                                      | Andersen lab at Scripps Research                                                       | SEARCH Alliance San Diego with Nanda Radamchar, David Dimmock, Linda Luo, Christina Clarke, Kathryn Bouic, Teresa Mueller, Denise Malicki                                                                                                                                                                                                                                                                                                                                                                                                                                                                                                                                                                      |
| EPI_ISL_1081598, EPI_ISL_1081599, EPI_ISL_1081601, EPI_ISL_1081602, EPI_ISL_1081606, EPI_ISL_1081607, EPI_ISL_1081608, EPI_ISL_1081609, EPI_ISL_1081610, EPI_ISL_1081611, EPI_ISL_1081615, EPI_ISL_1081616, EPI_ISL_1081617, EPI_ISL_1081628, EPI_ISL_1081630, EPI_ISL_1081631, EPI_ISL_1081632, EPI_ISL_1081633, EPI_ISL_1081634, EPI_ISL_1081636, EPI_ISL_1081637, EPI_ISL_1081638, EPI_ISL_1081639, EPI_ISL_1081640, EPI_ISL_1081641, EPI_ISL_1081643, EPI_ISL_1081644, EPI_ISL_1081645, EPI_ISL_1081646, EPI_ISL_1081650, EPI_ISL_1081651, EPI_ISL_1081652, EPI_ISL_1081653, EPI_ISL_1081654, EPI_ISL_1081655, EPI_ISL_1081657, EPI_ISL_1081658, EPI_ISL_1081659, EPI_ISL_1081660, EPI_ISL_1081661, EPI_ISL_1081662, EPI_ISL_1081663, EPI_ISL_1081674, EPI_ISL_1081675, EPI_ISL_1081676, EPI_ISL_1081677, EPI_ISL_1081678, EPI_ISL_1081679, EPI_ISL_1081682, EPI_ISL_1081683, EPI_ISL_1081684, EPI_ISL_1081687, EPI_ISL_1081688, EPI_ISL_1081689, EPI_ISL_1081690, EPI_ISL_1081692, EPI_ISL_1081693, EPI_ISL_1081694, EPI_ISL_1081695, EPI_ISL_1081696, EPI_ISL_1081697, EPI_ISL_1081698, EPI_ISL_1081699, EPI_ISL_1081700, EPI_ISL_1081701, EPI_ISL_1081702, EPI_ISL_1081703, EPI_ISL_1081704, EPI_ISL_1081705, EPI_ISL_1081706, EPI_ISL_1081707, EPI_ISL_1081708, EPI_ISL_1081709, EPI_ISL_1081710, EPI_ISL_1081711, EPI_ISL_1081712, EPI_ISL_1081713, EPI_ISL_1081714, EPI_ISL_1081715, EPI_ISL_1081717, EPI_ISL_1081718, EPI_ISL_1081719, EPI_ISL_1081720, EPI_ISL_1081721, EPI_ISL_1081722, EPI_ISL_1081723, EPI_ISL_1081725, EPI_ISL_1081726, EPI_ISL_1081727, EPI_ISL_1081728, EPI_ISL_1081729, EPI_ISL_1081730, EPI_ISL_1081732, EPI_ISL_1081734, EPI_ISL_1081735, EPI_ISL_1081737, EPI_ISL_1081739, EPI_ISL_1081740, EPI_ISL_1081741                                                                                                                                                                                                                                                                                                                                                                                                                                                                                                                                                                                                                                                                                                                                                                                                                                                                                                                                                                                                                                                                                                                                                                                                                                                                                                                                                                                                                                                                                                      |                                                                                                                |                                                                                        |                                                                                                                                                                                                                                                                                                                                                                                                                                                                                                                                                                                                                                                                                                                |
| see above                                                                                                                                                                                                                                                                                                                                                                                                                                                                                                                                                                                                                                                                                                                                                                                                                                                                                                                                                                                                                                                                                                                                                                                                                                                                                                                                                                                                                                                                                                                                                                                                                                                                                                                                                                                                                                                                                                                                                                                                                                                                                                                                                                                                                                                                                                                                                                                                                                                                                                                                                                                                                                                                                                                                                                                                                                                                                                                                                                                                                                                                                                                                                                                                                                              | Scripps Medical Laboratory                                                                                     | Andersen lab at Scripps Research                                                       | SEARCH Alliance San Diego with Michael Quigley, Ellen Stefanski, Ian Mchardy                                                                                                                                                                                                                                                                                                                                                                                                                                                                                                                                                                                                                                   |
| EPI_ISL_1081784, EPI_ISL_1081785, EPI_ISL_1081786, EPI_ISL_1081787, EPI_ISL_1081788, EPI_ISL_1081789, EPI_ISL_1081790, EPI_ISL_1081791                                                                                                                                                                                                                                                                                                                                                                                                                                                                                                                                                                                                                                                                                                                                                                                                                                                                                                                                                                                                                                                                                                                                                                                                                                                                                                                                                                                                                                                                                                                                                                                                                                                                                                                                                                                                                                                                                                                                                                                                                                                                                                                                                                                                                                                                                                                                                                                                                                                                                                                                                                                                                                                                                                                                                                                                                                                                                                                                                                                                                                                                                                                 | San Diego County Public Health Laboratory                                                                      | Andersen lab at Scripps Research                                                       | SEARCH Alliance San Diego with Tracy Basler, Jovan Shephard, Brett Austin                                                                                                                                                                                                                                                                                                                                                                                                                                                                                                                                                                                                                                      |
| EPI_ISL_1081815                                                                                                                                                                                                                                                                                                                                                                                                                                                                                                                                                                                                                                                                                                                                                                                                                                                                                                                                                                                                                                                                                                                                                                                                                                                                                                                                                                                                                                                                                                                                                                                                                                                                                                                                                                                                                                                                                                                                                                                                                                                                                                                                                                                                                                                                                                                                                                                                                                                                                                                                                                                                                                                                                                                                                                                                                                                                                                                                                                                                                                                                                                                                                                                                                                        | Philippine Red Cross - Port Area                                                                               | Philippine Genome Center                                                               | Francis A. Tablizo, Cynthia P. Saloma, Marc Jerrone R. Castro, Kenneth M. Kim, Maria Sofia L. Yangzon, Carlo M. Lapid, Benedict A. Maralit, Marc Edsel C. Ayes, Jan Michael C. Yap, Jo-Hannah S. Llames, Sheila Mae M. Araiza, Kris P. Punayan, Irish Coleen A. Asin, Candice Francheska B. Tambaoan, Asia Louisa U. Chong, Karol Sophia Agape R. Padilla, Rianna Patricia S. Cruz, El King D. Morado, Joshua Gregor A. Dizon, Eva Maria Cutiungco-de la Paz, Alethea R. de Guzman, Razel Nikka M. Hao, Arianne A. Zamora, Devon Ray Pacial, Juan Antonio R. Magalang, Marissa Alejandria, Celia Carlos, Anna Ong-Lim, Edsel Maurice Salvaña, John Q. Wong, Jaime C. Montoya, and Maria Rosario Singh-Vergeire |
| EPI_ISL_1081822                                                                                                                                                                                                                                                                                                                                                                                                                                                                                                                                                                                                                                                                                                                                                                                                                                                                                                                                                                                                                                                                                                                                                                                                                                                                                                                                                                                                                                                                                                                                                                                                                                                                                                                                                                                                                                                                                                                                                                                                                                                                                                                                                                                                                                                                                                                                                                                                                                                                                                                                                                                                                                                                                                                                                                                                                                                                                                                                                                                                                                                                                                                                                                                                                                        | Parkway Medical and Diagnostoc Center                                                                          | Philippine Genome Center                                                               | Francis A. Tablizo, Cynthia P. Saloma, Marc Jerrone R. Castro, Kenneth M. Kim, Maria Sofia L. Yangzon, Carlo M. Lapid, Benedict A. Maralit, Marc Edsel C. Ayes, Jan Michael C. Yap, Jo-Hannah S. Llames, Sheila Mae M. Araiza, Kris P. Punayan, Irish Coleen A. Asin, Candice Francheska B. Tambaoan, Asia Louisa U. Chong, Karol Sophia Agape R. Padilla, Rianna Patricia S. Cruz, El King D. Morado, Joshua Gregor A. Dizon, Eva Maria Cutiungco-de la Paz, Alethea R. de Guzman, Razel Nikka M. Hao, Arianne A. Zamora, Devon Ray Pacial, Juan Antonio R. Magalang, Marissa Alejandria, Celia Carlos, Anna Ong-Lim, Edsel Maurice Salvaña, John Q. Wong, Jaime C. Montoya, and Maria Rosario Singh-Vergeire |
| EPI_ISL_1081831                                                                                                                                                                                                                                                                                                                                                                                                                                                                                                                                                                                                                                                                                                                                                                                                                                                                                                                                                                                                                                                                                                                                                                                                                                                                                                                                                                                                                                                                                                                                                                                                                                                                                                                                                                                                                                                                                                                                                                                                                                                                                                                                                                                                                                                                                                                                                                                                                                                                                                                                                                                                                                                                                                                                                                                                                                                                                                                                                                                                                                                                                                                                                                                                                                        | Philippine Red Cross - Clark                                                                                   | Philippine Genome Center                                                               | Francis A. Tablizo, Cynthia P. Saloma, Marc Jerrone R. Castro, Kenneth M. Kim, Maria Sofia L. Yangzon, Carlo M. Lapid, Benedict A. Maralit, Marc Edsel C. Ayes, Jan Michael C. Yap, Jo-Hannah S. Llames, Sheila Mae M. Araiza, Kris P. Punayan, Irish Coleen A. Asin, Candice Francheska B. Tambaoan, Asia Louisa U. Chong, Karol Sophia Agape R. Padilla, Rianna Patricia S. Cruz, El King D. Morado, Joshua Gregor A. Dizon, Eva Maria Cutiungco-de la Paz, Alethea R. de Guzman, Razel Nikka M. Hao, Arianne A. Zamora, Devon Ray Pacial, Juan Antonio R. Magalang, Marissa Alejandria, Celia Carlos, Anna Ong-Lim, Edsel Maurice Salvaña, John Q. Wong, Jaime C. Montoya, and Maria Rosario Singh-Vergeire |
| EPI_ISL_1081838                                                                                                                                                                                                                                                                                                                                                                                                                                                                                                                                                                                                                                                                                                                                                                                                                                                                                                                                                                                                                                                                                                                                                                                                                                                                                                                                                                                                                                                                                                                                                                                                                                                                                                                                                                                                                                                                                                                                                                                                                                                                                                                                                                                                                                                                                                                                                                                                                                                                                                                                                                                                                                                                                                                                                                                                                                                                                                                                                                                                                                                                                                                                                                                                                                        | National Institute of Laboratory Medicine and Referral Center                                                  | Genomic Research Lab, BCSIR                                                            | Barna Goswami, Mohammad Samir Uzzaman, Eshrar Osman, Md. Ahashan Habib, Shahina Akter, Tanjina Akhtar Banu, Abu Sayeed Mohammad Mahmud, Md. Murshed Hasan Sarkar, Iffat Jahan, Md. Saddam Hossain, Tasnim Nafisa, Md. Maruf Ahmed Mdla, Mahmuda Yeasmin, Ashish Kumar Ghosh, Arifa Akram, A. K. M.Shamsuzzaman, Md. Salim Khan                                                                                                                                                                                                                                                                                                                                                                                 |
| EPI_ISL_1081980, EPI_ISL_1081981, EPI_ISL_1081982, EPI_ISL_1081983, EPI_ISL_1081984, EPI_ISL_1081985, EPI_ISL_1081986, EPI_ISL_1081987, EPI_ISL_1081988, EPI_ISL_1081989, EPI_ISL_1081991, EPI_ISL_1081992, EPI_ISL_1081993, EPI_ISL_1081994, EPI_ISL_1081995, EPI_ISL_1081996, EPI_ISL_1081997, EPI_ISL_1081998, EPI_ISL_1081999, EPI_ISL_1082000, EPI_ISL_1082001, EPI_ISL_1082002, EPI_ISL_1082003, EPI_ISL_1082004, EPI_ISL_1082005, EPI_ISL_1082006, EPI_ISL_1082007, EPI_ISL_1082008, EPI_ISL_1082009, EPI_ISL_1082010, EPI_ISL_1082011, EPI_ISL_1082012, EPI_ISL_1082013, EPI_ISL_1082014, EPI_ISL_1082015, EPI_ISL_1082016, EPI_ISL_1082017, EPI_ISL_1082018, EPI_ISL_1082019, EPI_ISL_1082020, EPI_ISL_1082021, EPI_ISL_1082022, EPI_ISL_1082023, EPI_ISL_1082024, EPI_ISL_1082025, EPI_ISL_1082026, EPI_ISL_1082027, EPI_ISL_1082028, EPI_ISL_1082029, EPI_ISL_1082030, EPI_ISL_1082031, EPI_ISL_1082032, EPI_ISL_1082033, EPI_ISL_1082034, EPI_ISL_1082035, EPI_ISL_1082036, EPI_ISL_1082037, EPI_ISL_1082038, EPI_ISL_1082039, EPI_ISL_1082040, EPI_ISL_1082041, EPI_ISL_1082042, EPI_ISL_1082043, EPI_ISL_1082044, EPI_ISL_1082045, EPI_ISL_1082046, EPI_ISL_1082047, EPI_ISL_1082049, EPI_ISL_1082050, EPI_ISL_1082051, EPI_ISL_1082052, EPI_ISL_1082053, EPI_ISL_1082054, EPI_ISL_1082055, EPI_ISL_1082056, EPI_ISL_1082057, EPI_ISL_1082058, EPI_ISL_1082059, EPI_ISL_1082061, EPI_ISL_1082062, EPI_ISL_1082063, EPI_ISL_1082064, EPI_ISL_1082065, EPI_ISL_1082066, EPI_ISL_1082068, EPI_ISL_1082069, EPI_ISL_1082070, EPI_ISL_1082071, EPI_ISL_1082073, EPI_ISL_1082075, EPI_ISL_1082076, EPI_ISL_1082077, EPI_ISL_1082078, EPI_ISL_1082079, EPI_ISL_1082080, EPI_ISL_1082081, EPI_ISL_1082082, EPI_ISL_1082083, EPI_ISL_1082084, EPI_ISL_1082085, EPI_ISL_1082086, EPI_ISL_1082087, EPI_ISL_1082088, EPI_ISL_1082089, EPI_ISL_1082090, EPI_ISL_1082091, EPI_ISL_1082092, EPI_ISL_1082093, EPI_ISL_1082094, EPI_ISL_1082095, EPI_ISL_1082096, EPI_ISL_1082097, EPI_ISL_1082099, EPI_ISL_1082100, EPI_ISL_1082101, EPI_ISL_1082102, EPI_ISL_1082103, EPI_ISL_1082104, EPI_ISL_1082105, EPI_ISL_1082106, EPI_ISL_1082108, EPI_ISL_1082109, EPI_ISL_1082110, EPI_ISL_1082111, EPI_ISL_1082112, EPI_ISL_1082113, EPI_ISL_1082114, EPI_ISL_1082115, EPI_ISL_1082116, EPI_ISL_1082117, EPI_ISL_1082118, EPI_ISL_1082167, EPI_ISL_1082168, EPI_ISL_1082169, EPI_ISL_1082191, EPI_ISL_1082193, EPI_ISL_1082194, EPI_ISL_1082195, EPI_ISL_1082196, EPI_ISL_1082197, EPI_ISL_1082198, EPI_ISL_1082199, EPI_ISL_1082200, EPI_ISL_1082201, EPI_ISL_1082202, EPI_ISL_1082203, EPI_ISL_1082206, EPI_ISL_1082210, EPI_ISL_1082211, EPI_ISL_1082212, EPI_ISL_1082213, EPI_ISL_1082214, EPI_ISL_1082215, EPI_ISL_1082217, EPI_ISL_1082218, EPI_ISL_1082219, EPI_ISL_1082220, EPI_ISL_1082221, EPI_ISL_1082222, EPI_ISL_1082223, EPI_ISL_1082224, EPI_ISL_1082225, EPI_ISL_1082226, EPI_ISL_1082227, EPI_ISL_1082228, EPI_ISL_1082229, EPI_ISL_1082230, EPI_ISL_1082232, EPI_ISL_1082233, EPI_ISL_1082234, EPI_ISL_1082235, EPI_ISL_1082236, EPI_ISL_1082237, EPI_ISL_1082238, EPI_ISL_1082239, EPI_ISL_1082240, EPI_ISL_1082241, EPI_ISL_1082242, EPI_ISL_1082243, EPI_ISL_1082244, EPI_ISL_1082245, EPI_ISL_1082247, EPI_ISL_1082249, EPI_ISL_1082251 |                                                                                                                |                                                                                        |                                                                                                                                                                                                                                                                                                                                                                                                                                                                                                                                                                                                                                                                                                                |
| see above                                                                                                                                                                                                                                                                                                                                                                                                                                                                                                                                                                                                                                                                                                                                                                                                                                                                                                                                                                                                                                                                                                                                                                                                                                                                                                                                                                                                                                                                                                                                                                                                                                                                                                                                                                                                                                                                                                                                                                                                                                                                                                                                                                                                                                                                                                                                                                                                                                                                                                                                                                                                                                                                                                                                                                                                                                                                                                                                                                                                                                                                                                                                                                                                                                              | Department of Virology and Immunology, University of Helsinki and Helsinki University Hospital, Huslab Finland | Department of Virology, Faculty of Medicine, University of Helsinki, Helsinki, Finland | Teemu Smura, Ravi Kant, Phuoc Truong, Hussein Alburkat, Hannimari Kallio-Kokko, Jenni Virtanen, Maija Suvanto, Essi Korhonen, Sari Hannula, Harri Kangas, Hanna Liimatainen, Satu Kurkela, Hanna Jarva, Maija Lappalainen, Pekka Ellonen, Olli Vapalahti                                                                                                                                                                                                                                                                                                                                                                                                                                                       |
| EPI_ISL_1082252                                                                                                                                                                                                                                                                                                                                                                                                                                                                                                                                                                                                                                                                                                                                                                                                                                                                                                                                                                                                                                                                                                                                                                                                                                                                                                                                                                                                                                                                                                                                                                                                                                                                                                                                                                                                                                                                                                                                                                                                                                                                                                                                                                                                                                                                                                                                                                                                                                                                                                                                                                                                                                                                                                                                                                                                                                                                                                                                                                                                                                                                                                                                                                                                                                        | "Stefan S. Nicolau" Institute of Virology                                                                      | "Stefan S. Nicolau" Institute of Virology                                              | Anca Botezatu, Iulia Virginia Iancu, Coralía Bleotu, Mihaela Economescu, Laura Necula, Denisa Dragu, Lilia Matei, Ioana Pitica, Marinela Bostan, Mirela Mihaila, Laura Grecu, Camelia Sultana, Simona Ruta, Ana Iulia Neagu, Adriana Plesa, Saviana Nedelianu, Alina Nastasie, Cristina Mambet, Gabriela Anton, Carmen Cristina Diaconu                                                                                                                                                                                                                                                                                                                                                                        |
| EPI_ISL_1082320, EPI_ISL_1082324                                                                                                                                                                                                                                                                                                                                                                                                                                                                                                                                                                                                                                                                                                                                                                                                                                                                                                                                                                                                                                                                                                                                                                                                                                                                                                                                                                                                                                                                                                                                                                                                                                                                                                                                                                                                                                                                                                                                                                                                                                                                                                                                                                                                                                                                                                                                                                                                                                                                                                                                                                                                                                                                                                                                                                                                                                                                                                                                                                                                                                                                                                                                                                                                                       | Spital Männedorf AG                                                                                            | Institute of Medical Virology, University of Zurich                                    | Verena Kufner, Gabriela Ziltener, Stefan Schmutz, Maryam Zaheri, Annette Audigé, Maria Grünberg, Kevin Steiner, Jon Huder, Cyril Shah, Riccarda Capaul, Guido Bloemberg, Jürg Böni, Michael Huber, Alexandra Trkola                                                                                                                                                                                                                                                                                                                                                                                                                                                                                            |
| EPI_ISL_1082327, EPI_ISL_1082328                                                                                                                                                                                                                                                                                                                                                                                                                                                                                                                                                                                                                                                                                                                                                                                                                                                                                                                                                                                                                                                                                                                                                                                                                                                                                                                                                                                                                                                                                                                                                                                                                                                                                                                                                                                                                                                                                                                                                                                                                                                                                                                                                                                                                                                                                                                                                                                                                                                                                                                                                                                                                                                                                                                                                                                                                                                                                                                                                                                                                                                                                                                                                                                                                       | Spital Limmattal                                                                                               | Institute of Medical Virology, University of Zurich                                    | Verena Kufner, Gabriela Ziltener, Stefan Schmutz, Maryam Zaheri, Annette Audigé, Maria Grünberg, Kevin Steiner, Jon Huder, Cyril Shah, Riccarda Capaul, Guido Bloemberg, Jürg Böni, Michael Huber, Alexandra Trkola                                                                                                                                                                                                                                                                                                                                                                                                                                                                                            |
| EPI_ISL_1082340                                                                                                                                                                                                                                                                                                                                                                                                                                                                                                                                                                                                                                                                                                                                                                                                                                                                                                                                                                                                                                                                                                                                                                                                                                                                                                                                                                                                                                                                                                                                                                                                                                                                                                                                                                                                                                                                                                                                                                                                                                                                                                                                                                                                                                                                                                                                                                                                                                                                                                                                                                                                                                                                                                                                                                                                                                                                                                                                                                                                                                                                                                                                                                                                                                        | Spital Männedorf AG                                                                                            | Institute of Medical Virology, University of Zurich                                    | Verena Kufner, Gabriela Ziltener, Stefan Schmutz, Maryam Zaheri, Annette Audigé, Maria Grünberg, Kevin Steiner, Jon Huder, Cyril Shah, Riccarda Capaul, Guido Bloemberg, Jürg Böni, Michael Huber, Alexandra Trkola                                                                                                                                                                                                                                                                                                                                                                                                                                                                                            |
| EPI_ISL_1082343                                                                                                                                                                                                                                                                                                                                                                                                                                                                                                                                                                                                                                                                                                                                                                                                                                                                                                                                                                                                                                                                                                                                                                                                                                                                                                                                                                                                                                                                                                                                                                                                                                                                                                                                                                                                                                                                                                                                                                                                                                                                                                                                                                                                                                                                                                                                                                                                                                                                                                                                                                                                                                                                                                                                                                                                                                                                                                                                                                                                                                                                                                                                                                                                                                        | Kantonsspital Baden AG                                                                                         | Institute of Medical Virology, University of Zurich                                    | Verena Kufner, Gabriela Ziltener, Stefan Schmutz, Maryam Zaheri, Annette Audigé, Maria Grünberg, Kevin Steiner, Jon Huder, Cyril Shah, Riccarda Capaul, Guido Bloemberg, Jürg Böni, Michael Huber, Alexandra Trkola                                                                                                                                                                                                                                                                                                                                                                                                                                                                                            |
| EPI_ISL_1082349                                                                                                                                                                                                                                                                                                                                                                                                                                                                                                                                                                                                                                                                                                                                                                                                                                                                                                                                                                                                                                                                                                                                                                                                                                                                                                                                                                                                                                                                                                                                                                                                                                                                                                                                                                                                                                                                                                                                                                                                                                                                                                                                                                                                                                                                                                                                                                                                                                                                                                                                                                                                                                                                                                                                                                                                                                                                                                                                                                                                                                                                                                                                                                                                                                        | Spital Limmattal                                                                                               | Institute of Medical Virology, University of Zurich                                    | Verena Kufner, Gabriela Ziltener, Stefan Schmutz, Maryam Zaheri, Annette Audigé, Maria Grünberg, Kevin Steiner, Jon Huder, Cyril Shah, Riccarda Capaul, Guido Bloemberg, Jürg Böni, Michael Huber, Alexandra Trkola                                                                                                                                                                                                                                                                                                                                                                                                                                                                                            |
| EPI_ISL_1082351                                                                                                                                                                                                                                                                                                                                                                                                                                                                                                                                                                                                                                                                                                                                                                                                                                                                                                                                                                                                                                                                                                                                                                                                                                                                                                                                                                                                                                                                                                                                                                                                                                                                                                                                                                                                                                                                                                                                                                                                                                                                                                                                                                                                                                                                                                                                                                                                                                                                                                                                                                                                                                                                                                                                                                                                                                                                                                                                                                                                                                                                                                                                                                                                                                        | Spital Männedorf AG                                                                                            | Institute of Medical Virology, University of Zurich                                    | Verena Kufner, Gabriela Ziltener, Stefan Schmutz, Maryam Zaheri, Annette Audigé, Maria Grünberg, Kevin Steiner, Jon Huder, Cyril Shah, Riccarda Capaul, Guido Bloemberg, Jürg Böni, Michael Huber, Alexandra Trkola                                                                                                                                                                                                                                                                                                                                                                                                                                                                                            |
| EPI_ISL_1082358, EPI_ISL_1082359                                                                                                                                                                                                                                                                                                                                                                                                                                                                                                                                                                                                                                                                                                                                                                                                                                                                                                                                                                                                                                                                                                                                                                                                                                                                                                                                                                                                                                                                                                                                                                                                                                                                                                                                                                                                                                                                                                                                                                                                                                                                                                                                                                                                                                                                                                                                                                                                                                                                                                                                                                                                                                                                                                                                                                                                                                                                                                                                                                                                                                                                                                                                                                                                                       | Spital Limmattal                                                                                               | Institute of Medical Virology, University of Zurich                                    | Verena Kufner, Gabriela Ziltener, Stefan Schmutz, Maryam Zaheri, Annette Audigé, Maria Grünberg, Kevin Steiner, Jon Huder, Cyril Shah, Riccarda Capaul, Guido Bloemberg, Jürg Böni, Michael Huber, Alexandra Trkola                                                                                                                                                                                                                                                                                                                                                                                                                                                                                            |
| EPI_ISL_1082361                                                                                                                                                                                                                                                                                                                                                                                                                                                                                                                                                                                                                                                                                                                                                                                                                                                                                                                                                                                                                                                                                                                                                                                                                                                                                                                                                                                                                                                                                                                                                                                                                                                                                                                                                                                                                                                                                                                                                                                                                                                                                                                                                                                                                                                                                                                                                                                                                                                                                                                                                                                                                                                                                                                                                                                                                                                                                                                                                                                                                                                                                                                                                                                                                                        | Spital Männedorf AG                                                                                            | Institute of Medical Virology, University of Zurich                                    | Verena Kufner, Gabriela Ziltener, Stefan Schmutz, Maryam Zaheri, Annette Audigé, Maria Grünberg, Kevin Steiner, Jon Huder, Cyril Shah, Riccarda Capaul, Guido Bloemberg, Jürg Böni, Michael Huber, Alexandra Trkola                                                                                                                                                                                                                                                                                                                                                                                                                                                                                            |
| EPI_ISL_1082362                                                                                                                                                                                                                                                                                                                                                                                                                                                                                                                                                                                                                                                                                                                                                                                                                                                                                                                                                                                                                                                                                                                                                                                                                                                                                                                                                                                                                                                                                                                                                                                                                                                                                                                                                                                                                                                                                                                                                                                                                                                                                                                                                                                                                                                                                                                                                                                                                                                                                                                                                                                                                                                                                                                                                                                                                                                                                                                                                                                                                                                                                                                                                                                                                                        | Kantonsspital Münsterlingen                                                                                    | Institute of Medical Virology, University of Zurich                                    | Verena Kufner, Gabriela Ziltener, Stefan Schmutz, Maryam Zaheri, Annette Audigé, Maria Grünberg, Kevin Steiner, Jon Huder, Cyril Shah, Riccarda Capaul, Guido Bloemberg, Jürg Böni, Michael Huber, Alexandra Trkola                                                                                                                                                                                                                                                                                                                                                                                                                                                                                            |
| EPI_ISL_1082363                                                                                                                                                                                                                                                                                                                                                                                                                                                                                                                                                                                                                                                                                                                                                                                                                                                                                                                                                                                                                                                                                                                                                                                                                                                                                                                                                                                                                                                                                                                                                                                                                                                                                                                                                                                                                                                                                                                                                                                                                                                                                                                                                                                                                                                                                                                                                                                                                                                                                                                                                                                                                                                                                                                                                                                                                                                                                                                                                                                                                                                                                                                                                                                                                                        | Spital Männedorf AG                                                                                            | Institute of Medical Virology, University of Zurich                                    | Verena Kufner, Gabriela Ziltener, Stefan Schmutz, Maryam Zaheri, Annette Audigé, Maria Grünberg, Kevin Steiner, Jon Huder, Cyril Shah, Riccarda Capaul, Guido Bloemberg, Jürg Böni, Michael Huber, Alexandra Trkola                                                                                                                                                                                                                                                                                                                                                                                                                                                                                            |
| EPI_ISL_1082364                                                                                                                                                                                                                                                                                                                                                                                                                                                                                                                                                                                                                                                                                                                                                                                                                                                                                                                                                                                                                                                                                                                                                                                                                                                                                                                                                                                                                                                                                                                                                                                                                                                                                                                                                                                                                                                                                                                                                                                                                                                                                                                                                                                                                                                                                                                                                                                                                                                                                                                                                                                                                                                                                                                                                                                                                                                                                                                                                                                                                                                                                                                                                                                                                                        | Spital Limmattal                                                                                               | Institute of Medical Virology, University of Zurich                                    | Verena Kufner, Gabriela Ziltener, Stefan Schmutz, Maryam Zaheri, Annette Audigé, Maria Grünberg, Kevin Steiner, Jon Huder, Cyril Shah, Riccarda Capaul, Guido Bloemberg, Jürg Böni, Michael Huber, Alexandra Trkola                                                                                                                                                                                                                                                                                                                                                                                                                                                                                            |
| EPI_ISL_1082365, EPI_ISL_1082375, EPI_ISL_1082376                                                                                                                                                                                                                                                                                                                                                                                                                                                                                                                                                                                                                                                                                                                                                                                                                                                                                                                                                                                                                                                                                                                                                                                                                                                                                                                                                                                                                                                                                                                                                                                                                                                                                                                                                                                                                                                                                                                                                                                                                                                                                                                                                                                                                                                                                                                                                                                                                                                                                                                                                                                                                                                                                                                                                                                                                                                                                                                                                                                                                                                                                                                                                                                                      | Spital Männedorf AG                                                                                            | Institute of Medical Virology, University of Zurich                                    | Verena Kufner, Gabriela Ziltener, Stefan Schmutz, Maryam Zaheri, Annette Audigé, Maria Grünberg, Kevin Steiner, Jon Huder, Cyril Shah, Riccarda Capaul, Guido Bloemberg, Jürg Böni, Michael Huber, Alexandra Trkola                                                                                                                                                                                                                                                                                                                                                                                                                                                                                            |
| EPI_ISL_1082378, EPI_ISL_1082384                                                                                                                                                                                                                                                                                                                                                                                                                                                                                                                                                                                                                                                                                                                                                                                                                                                                                                                                                                                                                                                                                                                                                                                                                                                                                                                                                                                                                                                                                                                                                                                                                                                                                                                                                                                                                                                                                                                                                                                                                                                                                                                                                                                                                                                                                                                                                                                                                                                                                                                                                                                                                                                                                                                                                                                                                                                                                                                                                                                                                                                                                                                                                                                                                       | Spital Limmattal                                                                                               | Institute of Medical Virology, University of Zurich                                    | Verena Kufner, Gabriela Ziltener, Stefan Schmutz, Maryam Zaheri, Annette Audigé, Maria Grünberg, Kevin Steiner, Jon Huder, Cyril Shah, Riccarda                                                                                                                                                                                                                                                                                                                                                                                                                                                                                                                                                                |

|                                                                                     |                                                                                    |                                                                                                                                                                                                                                                   |                                                                                                                                                                                                                                                                                            |
|-------------------------------------------------------------------------------------|------------------------------------------------------------------------------------|---------------------------------------------------------------------------------------------------------------------------------------------------------------------------------------------------------------------------------------------------|--------------------------------------------------------------------------------------------------------------------------------------------------------------------------------------------------------------------------------------------------------------------------------------------|
| EPI_ISL_1082387                                                                     | Spital Männedorf AG                                                                | Institute of Medical Virology, University of Zurich                                                                                                                                                                                               | Capaul, Guido Bloemberg, Jürg Böni, Michael Huber, Alexandra Trkola<br>Verena Kufner, Gabriela Zillener, Stefan Schmutz, Maryam Zaheri, Annette Audigé, Maria Grünberg, Kevin Steiner, Jon Huder, Cyril Shah, Riccarda Capaul, Guido Bloemberg, Jürg Böni, Michael Huber, Alexandra Trkola |
| EPI_ISL_1082429, EPI_ISL_1082430                                                    | Ministry of Health Turkey                                                          | Ministry of Health Turkey                                                                                                                                                                                                                         | Fatma Bayrakdar, Yasemin Cogun, Süleyman Yalcin, Aye Baak Alta, Gülay Korukluolu                                                                                                                                                                                                           |
| EPI_ISL_1082453, EPI_ISL_1082526, EPI_ISL_1082888, EPI_ISL_1083590, EPI_ISL_1084605 | Ohio Department of Health Laboratory                                               | Ohio Department of Health Laboratory                                                                                                                                                                                                              | Holmes, Jennifer; Eric Brandt, Keoni Omura, Glen McGilivray, Caitlin McDonnell, Jade Mowery, Stephanie Mccracken, Tyler Payne, Kirtana Ramadugu, Erica Leasure, Brent Lee, Kelsey Florek, Heather Blankenship, Allison Black, Quanta Brown, and Tammy Bannerman                            |
| EPI_ISL_1084610                                                                     | Hospital for Infectious Diseases, Molecular Diagnostics Laboratory, Warsaw, Poland | 8. Laboratory of Recombinant Vaccines, Intercollegiate Faculty of Biotechnology University of Gdansk and Medical University of Gdansk, 2. ViroGenetics - BSL3 Laboratory of Virology, Maopolska Centre of Biotechnology, Jagiellonian University  | Lukasz Rabalski, Maciej Kosinski, Natalia Mazur-Panasiuk, Aneta Kopacz, Piotr Zabek, Tomasz Dyda, Andrzej Horban, Krzysztof Pyrc, Krystyna Bienkowska-Szewczyk                                                                                                                             |
| EPI_ISL_1084611                                                                     | Hospital for Infectious Diseases, Molecular Diagnostics Laboratory, Warsaw, Poland | 26. Laboratory of Recombinant Vaccines, Intercollegiate Faculty of Biotechnology University of Gdansk and Medical University of Gdansk, 2. ViroGenetics - BSL3 Laboratory of Virology, Maopolska Centre of Biotechnology, Jagiellonian University | Lukasz Rabalski, Maciej Kosinski, Natalia Mazur-Panasiuk, Aneta Kopacz, Piotr Zabek, Tomasz Dyda, Andrzej Horban, Krzysztof Pyrc, Krystyna Bienkowska-Szewczyk                                                                                                                             |
| EPI_ISL_1084612                                                                     | Hospital for Infectious Diseases, Molecular Diagnostics Laboratory, Warsaw, Poland | 40. Laboratory of Recombinant Vaccines, Intercollegiate Faculty of Biotechnology University of Gdansk and Medical University of Gdansk, 2. ViroGenetics - BSL3 Laboratory of Virology, Maopolska Centre of Biotechnology, Jagiellonian University | Lukasz Rabalski, Maciej Kosinski, Natalia Mazur-Panasiuk, Aneta Kopacz, Piotr Zabek, Tomasz Dyda, Andrzej Horban, Krzysztof Pyrc, Krystyna Bienkowska-Szewczyk                                                                                                                             |
| EPI_ISL_1084614                                                                     | Hospital for Infectious Diseases, Molecular Diagnostics Laboratory, Warsaw, Poland | 56. Laboratory of Recombinant Vaccines, Intercollegiate Faculty of Biotechnology University of Gdansk and Medical University of Gdansk, 2. ViroGenetics - BSL3 Laboratory of Virology, Maopolska Centre of Biotechnology, Jagiellonian University | Lukasz Rabalski, Maciej Kosinski, Natalia Mazur-Panasiuk, Aneta Kopacz, Piotr Zabek, Tomasz Dyda, Andrzej Horban, Krzysztof Pyrc, Krystyna Bienkowska-Szewczyk                                                                                                                             |
| EPI_ISL_1084620                                                                     | Hospital for Infectious Diseases, Molecular Diagnostics Laboratory, Warsaw, Poland | 10. Laboratory of Recombinant Vaccines, Intercollegiate Faculty of Biotechnology University of Gdansk and Medical University of Gdansk, 2. ViroGenetics - BSL3 Laboratory of Virology, Maopolska Centre of Biotechnology, Jagiellonian University | Lukasz Rabalski, Maciej Kosinski, Natalia Mazur-Panasiuk, Aneta Kopacz, Piotr Zabek, Tomasz Dyda, Andrzej Horban, Krzysztof Pyrc, Krystyna Bienkowska-Szewczyk                                                                                                                             |
| EPI_ISL_1084621                                                                     | Hospital for Infectious Diseases, Molecular Diagnostics Laboratory, Warsaw, Poland | 18. Laboratory of Recombinant Vaccines, Intercollegiate Faculty of Biotechnology University of Gdansk and Medical University of Gdansk, 2. ViroGenetics - BSL3 Laboratory of Virology, Maopolska Centre of Biotechnology, Jagiellonian University | Lukasz Rabalski, Maciej Kosinski, Natalia Mazur-Panasiuk, Aneta Kopacz, Piotr Zabek, Tomasz Dyda, Andrzej Horban, Krzysztof Pyrc, Krystyna Bienkowska-Szewczyk                                                                                                                             |
| EPI_ISL_1084622                                                                     | Hospital for Infectious Diseases, Molecular Diagnostics Laboratory, Warsaw, Poland | 22. Laboratory of Recombinant Vaccines, Intercollegiate Faculty of Biotechnology University of Gdansk and Medical University of Gdansk, 2. ViroGenetics - BSL3 Laboratory of Virology, Maopolska Centre of Biotechnology, Jagiellonian University | Lukasz Rabalski, Maciej Kosinski, Natalia Mazur-Panasiuk, Aneta Kopacz, Piotr Zabek, Tomasz Dyda, Andrzej Horban, Krzysztof Pyrc, Krystyna Bienkowska-Szewczyk                                                                                                                             |
| EPI_ISL_1084623                                                                     | Hospital for Infectious Diseases, Molecular Diagnostics Laboratory, Warsaw, Poland | 28. Laboratory of Recombinant Vaccines, Intercollegiate Faculty of Biotechnology University of Gdansk and Medical University of Gdansk, 2. ViroGenetics - BSL3 Laboratory of Virology, Maopolska Centre of Biotechnology, Jagiellonian University | Lukasz Rabalski, Maciej Kosinski, Natalia Mazur-Panasiuk, Aneta Kopacz, Piotr Zabek, Tomasz Dyda, Andrzej Horban, Krzysztof Pyrc, Krystyna Bienkowska-Szewczyk                                                                                                                             |
| EPI_ISL_1084624                                                                     | Hospital for Infectious Diseases, Molecular Diagnostics Laboratory, Warsaw, Poland | 37. Laboratory of Recombinant Vaccines, Intercollegiate Faculty of Biotechnology University of Gdansk and Medical University of Gdansk, 2. ViroGenetics - BSL3 Laboratory of Virology, Maopolska Centre of Biotechnology, Jagiellonian University | Lukasz Rabalski, Maciej Kosinski, Natalia Mazur-Panasiuk, Aneta Kopacz, Piotr Zabek, Tomasz Dyda, Andrzej Horban, Krzysztof Pyrc, Krystyna Bienkowska-Szewczyk                                                                                                                             |
| EPI_ISL_1084626                                                                     | Hospital for Infectious Diseases, Molecular Diagnostics Laboratory, Warsaw, Poland | 42. Laboratory of Recombinant Vaccines, Intercollegiate Faculty of Biotechnology University of Gdansk and Medical University of Gdansk, 2. ViroGenetics - BSL3 Laboratory of Virology, Maopolska Centre of Biotechnology, Jagiellonian University | Lukasz Rabalski, Maciej Kosinski, Natalia Mazur-Panasiuk, Aneta Kopacz, Piotr Zabek, Tomasz Dyda, Andrzej Horban, Krzysztof Pyrc, Krystyna Bienkowska-Szewczyk                                                                                                                             |
| EPI_ISL_1084627                                                                     | Hospital for Infectious Diseases, Molecular Diagnostics Laboratory, Warsaw, Poland | 2. Laboratory of Recombinant Vaccines, Intercollegiate Faculty of Biotechnology University of Gdansk and Medical University of Gdansk, 2. ViroGenetics - BSL3 Laboratory of Virology, Maopolska Centre of Biotechnology, Jagiellonian University  | Lukasz Rabalski, Maciej Kosinski, Natalia Mazur-Panasiuk, Aneta Kopacz, Piotr Zabek, Tomasz Dyda, Andrzej Horban, Krzysztof Pyrc, Krystyna Bienkowska-Szewczyk                                                                                                                             |
| EPI_ISL_1084628                                                                     | Hospital for Infectious Diseases, Molecular Diagnostics Laboratory, Warsaw, Poland | 7. Laboratory of Recombinant Vaccines, Intercollegiate Faculty of Biotechnology University of Gdansk and Medical University of Gdansk, 2. ViroGenetics - BSL3 Laboratory of Virology, Maopolska Centre of Biotechnology, Jagiellonian University  | Lukasz Rabalski, Maciej Kosinski, Natalia Mazur-Panasiuk, Aneta Kopacz, Piotr Zabek, Tomasz Dyda, Andrzej Horban, Krzysztof Pyrc, Krystyna Bienkowska-Szewczyk                                                                                                                             |
| EPI_ISL_1084629                                                                     | Hospital for Infectious Diseases, Molecular Diagnostics Laboratory, Warsaw, Poland | 31. Laboratory of Recombinant Vaccines, Intercollegiate Faculty of Biotechnology University of Gdansk and Medical University of Gdansk, 2. ViroGenetics - BSL3 Laboratory of Virology, Maopolska Centre of Biotechnology, Jagiellonian University | Lukasz Rabalski, Maciej Kosinski, Natalia Mazur-Panasiuk, Aneta Kopacz, Piotr Zabek, Tomasz Dyda, Andrzej Horban, Krzysztof Pyrc, Krystyna Bienkowska-Szewczyk                                                                                                                             |
| EPI_ISL_1084630                                                                     | Hospital for Infectious Diseases, Molecular Diagnostics Laboratory, Warsaw, Poland | 35. Laboratory of Recombinant Vaccines, Intercollegiate Faculty of Biotechnology University of Gdansk and Medical University of Gdansk, 2. ViroGenetics - BSL3 Laboratory of Virology, Maopolska Centre of Biotechnology, Jagiellonian University | Lukasz Rabalski, Maciej Kosinski, Natalia Mazur-Panasiuk, Aneta Kopacz, Piotr Zabek, Tomasz Dyda, Andrzej Horban, Krzysztof Pyrc, Krystyna Bienkowska-Szewczyk                                                                                                                             |
| EPI_ISL_1084631                                                                     | Hospital for Infectious Diseases, Molecular Diagnostics                            | 7. Laboratory of Recombinant Vaccines, Intercollegiate                                                                                                                                                                                            | Lukasz Rabalski, Maciej Kosinski, Natalia Mazur-Panasiuk, Aneta Kopacz, Piotr Zabek, Tomasz Dyda, Andrzej Horban, Krzysztof Pyrc, Krystyna                                                                                                                                                 |









|                                                                                                                                                                                                                                                                                                                                                                                                                                                                                                                                                                                                                                                                                                                                                                            |                                                                  |                                                                                                    |                                                                                                                                                                                                                                                                          |                                                                                                                                                                                                                                                                                                                                                                                            |
|----------------------------------------------------------------------------------------------------------------------------------------------------------------------------------------------------------------------------------------------------------------------------------------------------------------------------------------------------------------------------------------------------------------------------------------------------------------------------------------------------------------------------------------------------------------------------------------------------------------------------------------------------------------------------------------------------------------------------------------------------------------------------|------------------------------------------------------------------|----------------------------------------------------------------------------------------------------|--------------------------------------------------------------------------------------------------------------------------------------------------------------------------------------------------------------------------------------------------------------------------|--------------------------------------------------------------------------------------------------------------------------------------------------------------------------------------------------------------------------------------------------------------------------------------------------------------------------------------------------------------------------------------------|
| EPI_ISL_1093799, EPI_ISL_1093800, EPI_ISL_1093801, EPI_ISL_1093803, EPI_ISL_1093804, EPI_ISL_1093805, EPI_ISL_1093806, EPI_ISL_1093808, EPI_ISL_1093809, EPI_ISL_1093861, EPI_ISL_1093863, EPI_ISL_1093866, EPI_ISL_1093869, EPI_ISL_1093886, EPI_ISL_1093893, EPI_ISL_1093895, EPI_ISL_1093921, EPI_ISL_1093935, EPI_ISL_1093937, EPI_ISL_1093939, EPI_ISL_1093946, EPI_ISL_1093947, EPI_ISL_1093948, EPI_ISL_1093949, EPI_ISL_1093964, EPI_ISL_1093965, EPI_ISL_1093980, EPI_ISL_1093991, EPI_ISL_1093993, EPI_ISL_1094000, EPI_ISL_1094016, EPI_ISL_1094024, EPI_ISL_1094026, EPI_ISL_1094027, EPI_ISL_1094028, EPI_ISL_1094036, EPI_ISL_1094040, EPI_ISL_1094053, EPI_ISL_1094058, EPI_ISL_1094071, EPI_ISL_1094085, EPI_ISL_1094174, EPI_ISL_1094177, EPI_ISL_1094185 | see above                                                        | DeRisi Lab, University of California, San Francisco                                                | DeRisi Lab, University of California, San Francisco                                                                                                                                                                                                                      | Sabrina Mann, Anthea Mitchell, Jamin Liu, Sara Sunshine, Matthew Laurie, Genay Pilarowski, Amy Kistler, Manu Vanaerschoot, Patrick Ayscue, Lucy Li, Eric Chow, IDseq Team, James Peng, Carina Marquez, Luis Rubio, Gabriel Charnie, Diane Jones, Jon Jacobo, Susana Rojas, Susy Rojas, Valerie Tulier-Laiwa, Douglas Black, Jackie Martinez, Maya Petersen, Diane Havir, and Joseph DeRisi |
| EPI_ISL_1094192                                                                                                                                                                                                                                                                                                                                                                                                                                                                                                                                                                                                                                                                                                                                                            | KU Leuven, Rega Institute, Clinical and Epidemiological Virology | KU Leuven, Rega Institute, Clinical and Epidemiological Virology                                   | Tony Wawina-Bokalanga, Bert Vanmechelen, Joan Marti-Carreras, Piet Maes                                                                                                                                                                                                  |                                                                                                                                                                                                                                                                                                                                                                                            |
| EPI_ISL_1094238                                                                                                                                                                                                                                                                                                                                                                                                                                                                                                                                                                                                                                                                                                                                                            | AK State Public Health Lab, State Health Department              | Respiratory Viruses Branch, Division of Viral Diseases, Centers for Disease Control and Prevention | Krista Queen, Yan Li, Ying Tao, Jing Zhang, Anna Uehara, Anna Montmayeur, Clinton R. Paden, Peter W. Cook, Rachel Marine, Mili Sheth, Jasmine Padilla, Sarah Nobles, Mark Burroughs, Lori Rowe, Haibin Wang, Ben L. Rambo-Martin, Dhvani Batra, Justin Lee, Suxiang Tong |                                                                                                                                                                                                                                                                                                                                                                                            |
| EPI_ISL_1094242                                                                                                                                                                                                                                                                                                                                                                                                                                                                                                                                                                                                                                                                                                                                                            | FL Bur. of Public Health Laboratories-Jacksonville               | Respiratory Viruses Branch, Division of Viral Diseases, Centers for Disease Control and Prevention | Krista Queen, Yan Li, Ying Tao, Jing Zhang, Anna Uehara, Anna Montmayeur, Clinton R. Paden, Peter W. Cook, Rachel Marine, Mili Sheth, Jasmine Padilla, Sarah Nobles, Mark Burroughs, Lori Rowe, Haibin Wang, Ben L. Rambo-Martin, Dhvani Batra, Justin Lee, Suxiang Tong |                                                                                                                                                                                                                                                                                                                                                                                            |
| EPI_ISL_1094245                                                                                                                                                                                                                                                                                                                                                                                                                                                                                                                                                                                                                                                                                                                                                            | VT Dept. of Health Laboratory                                    | Respiratory Viruses Branch, Division of Viral Diseases, Centers for Disease Control and Prevention | Krista Queen, Yan Li, Ying Tao, Jing Zhang, Anna Uehara, Anna Montmayeur, Clinton R. Paden, Peter W. Cook, Rachel Marine, Mili Sheth, Jasmine Padilla, Sarah Nobles, Mark Burroughs, Lori Rowe, Haibin Wang, Ben L. Rambo-Martin, Dhvani Batra, Justin Lee, Suxiang Tong |                                                                                                                                                                                                                                                                                                                                                                                            |
| EPI_ISL_1094251                                                                                                                                                                                                                                                                                                                                                                                                                                                                                                                                                                                                                                                                                                                                                            | WA State Department of Health                                    | Respiratory Viruses Branch, Division of Viral Diseases, Centers for Disease Control and Prevention | Krista Queen, Yan Li, Ying Tao, Jing Zhang, Anna Uehara, Anna Montmayeur, Clinton R. Paden, Peter W. Cook, Rachel Marine, Mili Sheth, Jasmine Padilla, Sarah Nobles, Mark Burroughs, Lori Rowe, Haibin Wang, Ben L. Rambo-Martin, Dhvani Batra, Justin Lee, Suxiang Tong |                                                                                                                                                                                                                                                                                                                                                                                            |
| EPI_ISL_1094254                                                                                                                                                                                                                                                                                                                                                                                                                                                                                                                                                                                                                                                                                                                                                            | KS Health and Environmental Laboratories                         | Respiratory Viruses Branch, Division of Viral Diseases, Centers for Disease Control and Prevention | Krista Queen, Yan Li, Ying Tao, Jing Zhang, Anna Uehara, Anna Montmayeur, Clinton R. Paden, Peter W. Cook, Rachel Marine, Mili Sheth, Jasmine Padilla, Sarah Nobles, Mark Burroughs, Lori Rowe, Haibin Wang, Ben L. Rambo-Martin, Dhvani Batra, Justin Lee, Suxiang Tong |                                                                                                                                                                                                                                                                                                                                                                                            |
| EPI_ISL_1094307                                                                                                                                                                                                                                                                                                                                                                                                                                                                                                                                                                                                                                                                                                                                                            | NYSDOH Wadsworth Center, Virology Lab                            | Respiratory Viruses Branch, Division of Viral Diseases, Centers for Disease Control and Prevention | Krista Queen, Yan Li, Ying Tao, Jing Zhang, Anna Uehara, Anna Montmayeur, Clinton R. Paden, Peter W. Cook, Rachel Marine, Mili Sheth, Jasmine Padilla, Sarah Nobles, Mark Burroughs, Lori Rowe, Haibin Wang, Ben L. Rambo-Martin, Dhvani Batra, Justin Lee, Suxiang Tong |                                                                                                                                                                                                                                                                                                                                                                                            |
| EPI_ISL_1094308                                                                                                                                                                                                                                                                                                                                                                                                                                                                                                                                                                                                                                                                                                                                                            | AR Dept. of Health-Public Health Lab                             | Respiratory Viruses Branch, Division of Viral Diseases, Centers for Disease Control and Prevention | Krista Queen, Yan Li, Ying Tao, Jing Zhang, Anna Uehara, Anna Montmayeur, Clinton R. Paden, Peter W. Cook, Rachel Marine, Mili Sheth, Jasmine Padilla, Sarah Nobles, Mark Burroughs, Lori Rowe, Haibin Wang, Ben L. Rambo-Martin, Dhvani Batra, Justin Lee, Suxiang Tong |                                                                                                                                                                                                                                                                                                                                                                                            |
| EPI_ISL_1094313                                                                                                                                                                                                                                                                                                                                                                                                                                                                                                                                                                                                                                                                                                                                                            | KS Health and Environmental Laboratories                         | Respiratory Viruses Branch, Division of Viral Diseases, Centers for Disease Control and Prevention | Krista Queen, Yan Li, Ying Tao, Jing Zhang, Anna Uehara, Anna Montmayeur, Clinton R. Paden, Peter W. Cook, Rachel Marine, Mili Sheth, Jasmine Padilla, Sarah Nobles, Mark Burroughs, Lori Rowe, Haibin Wang, Ben L. Rambo-Martin, Dhvani Batra, Justin Lee, Suxiang Tong |                                                                                                                                                                                                                                                                                                                                                                                            |
| EPI_ISL_1094328                                                                                                                                                                                                                                                                                                                                                                                                                                                                                                                                                                                                                                                                                                                                                            | MT Public Health Laboratory                                      | Respiratory Viruses Branch, Division of Viral Diseases, Centers for Disease Control and Prevention | Krista Queen, Yan Li, Ying Tao, Jing Zhang, Anna Uehara, Anna Montmayeur, Clinton R. Paden, Peter W. Cook, Rachel Marine, Mili Sheth, Jasmine Padilla, Sarah Nobles, Mark Burroughs, Lori Rowe, Haibin Wang, Ben L. Rambo-Martin, Dhvani Batra, Justin Lee, Suxiang Tong |                                                                                                                                                                                                                                                                                                                                                                                            |
| EPI_ISL_1094330, EPI_ISL_1094331                                                                                                                                                                                                                                                                                                                                                                                                                                                                                                                                                                                                                                                                                                                                           | DC Public Health Lab/ Dept. of Forensic Sciences                 | Respiratory Viruses Branch, Division of Viral Diseases, Centers for Disease Control and Prevention | Krista Queen, Yan Li, Ying Tao, Jing Zhang, Anna Uehara, Anna Montmayeur, Clinton R. Paden, Peter W. Cook, Rachel Marine, Mili Sheth, Jasmine Padilla, Sarah Nobles, Mark Burroughs, Lori Rowe, Haibin Wang, Ben L. Rambo-Martin, Dhvani Batra, Justin Lee, Suxiang Tong |                                                                                                                                                                                                                                                                                                                                                                                            |
| EPI_ISL_1094335, EPI_ISL_1094336                                                                                                                                                                                                                                                                                                                                                                                                                                                                                                                                                                                                                                                                                                                                           | NE Public Health Laboratory                                      | Respiratory Viruses Branch, Division of Viral Diseases, Centers for Disease Control and Prevention | Krista Queen, Yan Li, Ying Tao, Jing Zhang, Anna Uehara, Anna Montmayeur, Clinton R. Paden, Peter W. Cook, Rachel Marine, Mili Sheth, Jasmine Padilla, Sarah Nobles, Mark Burroughs, Lori Rowe, Haibin Wang, Ben L. Rambo-Martin, Dhvani Batra, Justin Lee, Suxiang Tong |                                                                                                                                                                                                                                                                                                                                                                                            |
| EPI_ISL_1094337                                                                                                                                                                                                                                                                                                                                                                                                                                                                                                                                                                                                                                                                                                                                                            | OK Public Health Laboratory, Oklahoma State DOH                  | Respiratory Viruses Branch, Division of Viral Diseases, Centers for Disease Control and Prevention | Krista Queen, Yan Li, Ying Tao, Jing Zhang, Anna Uehara, Anna Montmayeur, Clinton R. Paden, Peter W. Cook, Rachel Marine, Mili Sheth, Jasmine Padilla, Sarah Nobles, Mark Burroughs, Lori Rowe, Haibin Wang, Ben L. Rambo-Martin, Dhvani Batra, Justin Lee, Suxiang Tong |                                                                                                                                                                                                                                                                                                                                                                                            |
| EPI_ISL_1094338                                                                                                                                                                                                                                                                                                                                                                                                                                                                                                                                                                                                                                                                                                                                                            | NC State Laboratory of Public Health                             | Respiratory Viruses Branch, Division of Viral Diseases, Centers for Disease Control and Prevention | Krista Queen, Yan Li, Ying Tao, Jing Zhang, Anna Uehara, Anna Montmayeur, Clinton R. Paden, Peter W. Cook, Rachel Marine, Mili Sheth, Jasmine Padilla, Sarah Nobles, Mark Burroughs, Lori Rowe, Haibin Wang, Ben L. Rambo-Martin, Dhvani Batra, Justin Lee, Suxiang Tong |                                                                                                                                                                                                                                                                                                                                                                                            |
| EPI_ISL_1094339                                                                                                                                                                                                                                                                                                                                                                                                                                                                                                                                                                                                                                                                                                                                                            | IN State Department of Health Laboratory Services                | Respiratory Viruses Branch, Division of Viral Diseases, Centers for Disease Control and Prevention | Krista Queen, Yan Li, Ying Tao, Jing Zhang, Anna Uehara, Anna Montmayeur, Clinton R. Paden, Peter W. Cook, Rachel Marine, Mili Sheth, Jasmine Padilla, Sarah Nobles, Mark Burroughs, Lori Rowe, Haibin Wang, Ben L. Rambo-Martin, Dhvani Batra, Justin Lee, Suxiang Tong |                                                                                                                                                                                                                                                                                                                                                                                            |
| EPI_ISL_1094341, EPI_ISL_1094342, EPI_ISL_1094343                                                                                                                                                                                                                                                                                                                                                                                                                                                                                                                                                                                                                                                                                                                          | DC Public Health Lab/ Dept. of Forensic Sciences                 | Respiratory Viruses Branch, Division of Viral Diseases, Centers for Disease Control and Prevention | Krista Queen, Yan Li, Ying Tao, Jing Zhang, Anna Uehara, Anna Montmayeur, Clinton R. Paden, Peter W. Cook, Rachel Marine, Mili Sheth, Jasmine Padilla, Sarah Nobles, Mark Burroughs, Lori Rowe, Haibin Wang, Ben L. Rambo-Martin, Dhvani Batra, Justin Lee, Suxiang Tong |                                                                                                                                                                                                                                                                                                                                                                                            |
| EPI_ISL_1094346                                                                                                                                                                                                                                                                                                                                                                                                                                                                                                                                                                                                                                                                                                                                                            | AZ SPHL, Arizona Department of Health Services                   | Respiratory Viruses Branch, Division of Viral Diseases, Centers for Disease Control and Prevention | Krista Queen, Yan Li, Ying Tao, Jing Zhang, Anna Uehara, Anna Montmayeur, Clinton R. Paden, Peter W. Cook, Rachel Marine, Mili Sheth, Jasmine Padilla, Sarah Nobles, Mark Burroughs, Lori Rowe, Haibin Wang, Ben L. Rambo-Martin, Dhvani Batra, Justin Lee, Suxiang Tong |                                                                                                                                                                                                                                                                                                                                                                                            |
| EPI_ISL_1094349                                                                                                                                                                                                                                                                                                                                                                                                                                                                                                                                                                                                                                                                                                                                                            | KS Health and Environmental Laboratories                         | Respiratory Viruses Branch, Division of Viral Diseases, Centers for Disease Control and Prevention | Krista Queen, Yan Li, Ying Tao, Jing Zhang, Anna Uehara, Anna Montmayeur, Clinton R. Paden, Peter W. Cook, Rachel Marine, Mili Sheth, Jasmine Padilla, Sarah Nobles, Mark Burroughs, Lori Rowe, Haibin Wang, Ben L. Rambo-Martin, Dhvani Batra, Justin Lee, Suxiang Tong |                                                                                                                                                                                                                                                                                                                                                                                            |
| EPI_ISL_1094353                                                                                                                                                                                                                                                                                                                                                                                                                                                                                                                                                                                                                                                                                                                                                            | AK State Public Health Lab, State Health Department              | Respiratory Viruses Branch, Division of Viral Diseases, Centers for Disease Control and Prevention | Krista Queen, Yan Li, Ying Tao, Jing Zhang, Anna Uehara, Anna Montmayeur, Clinton R. Paden, Peter W. Cook, Rachel Marine, Mili Sheth, Jasmine Padilla, Sarah Nobles, Mark Burroughs, Lori Rowe, Haibin Wang, Ben L. Rambo-Martin, Dhvani Batra, Justin Lee, Suxiang Tong |                                                                                                                                                                                                                                                                                                                                                                                            |
| EPI_ISL_1094354                                                                                                                                                                                                                                                                                                                                                                                                                                                                                                                                                                                                                                                                                                                                                            | NC State Laboratory of Public Health                             | Respiratory Viruses Branch, Division of Viral Diseases, Centers for Disease Control and Prevention | Krista Queen, Yan Li, Ying Tao, Jing Zhang, Anna Uehara, Anna Montmayeur, Clinton R. Paden, Peter W. Cook, Rachel Marine, Mili Sheth, Jasmine Padilla, Sarah Nobles, Mark Burroughs, Lori Rowe, Haibin Wang, Ben L. Rambo-Martin, Dhvani Batra, Justin Lee, Suxiang Tong |                                                                                                                                                                                                                                                                                                                                                                                            |
| EPI_ISL_1094359                                                                                                                                                                                                                                                                                                                                                                                                                                                                                                                                                                                                                                                                                                                                                            | NYSDOH Wadsworth Center, Virology Lab                            | Respiratory Viruses Branch, Division of Viral Diseases, Centers for Disease Control and Prevention | Krista Queen, Yan Li, Ying Tao, Jing Zhang, Anna Uehara, Anna Montmayeur, Clinton R. Paden, Peter W. Cook, Rachel Marine, Mili Sheth, Jasmine Padilla, Sarah Nobles, Mark Burroughs, Lori Rowe, Haibin Wang, Ben L. Rambo-Martin, Dhvani Batra, Justin Lee, Suxiang Tong |                                                                                                                                                                                                                                                                                                                                                                                            |
| EPI_ISL_1094364                                                                                                                                                                                                                                                                                                                                                                                                                                                                                                                                                                                                                                                                                                                                                            | GA Department of Public Health Laboratory                        | Respiratory Viruses Branch, Division of Viral Diseases, Centers for Disease Control and Prevention | Krista Queen, Yan Li, Ying Tao, Jing Zhang, Anna Uehara, Anna Montmayeur, Clinton R. Paden, Peter W. Cook, Rachel Marine, Mili Sheth, Jasmine Padilla, Sarah Nobles, Mark Burroughs, Lori Rowe, Haibin Wang, Ben L. Rambo-Martin, Dhvani Batra, Justin Lee, Suxiang Tong |                                                                                                                                                                                                                                                                                                                                                                                            |
| EPI_ISL_1094366                                                                                                                                                                                                                                                                                                                                                                                                                                                                                                                                                                                                                                                                                                                                                            | AK State Public Health Lab, State Health Department              | Respiratory Viruses Branch, Division of Viral Diseases, Centers for Disease Control and Prevention | Krista Queen, Yan Li, Ying Tao, Jing Zhang, Anna Uehara, Anna Montmayeur, Clinton R. Paden, Peter W. Cook, Rachel Marine, Mili Sheth, Jasmine Padilla, Sarah Nobles, Mark Burroughs, Lori Rowe, Haibin Wang, Ben L. Rambo-Martin, Dhvani Batra, Justin Lee, Suxiang Tong |                                                                                                                                                                                                                                                                                                                                                                                            |
| EPI_ISL_1094369                                                                                                                                                                                                                                                                                                                                                                                                                                                                                                                                                                                                                                                                                                                                                            | MT Public Health Laboratory                                      | Respiratory Viruses Branch, Division of Viral Diseases, Centers for Disease Control and Prevention | Krista Queen, Yan Li,                                                                                                                                                                                                                                                    |                                                                                                                                                                                                                                                                                                                                                                                            |

[illegible]







|                                                                                                                                                                                                                                                                                                                                                                                                       |                                                                                                                                                                                                                              |                                                                                                                                                     |                                                                                                                                                                                                                                                                                                                                                                                                                                     |
|-------------------------------------------------------------------------------------------------------------------------------------------------------------------------------------------------------------------------------------------------------------------------------------------------------------------------------------------------------------------------------------------------------|------------------------------------------------------------------------------------------------------------------------------------------------------------------------------------------------------------------------------|-----------------------------------------------------------------------------------------------------------------------------------------------------|-------------------------------------------------------------------------------------------------------------------------------------------------------------------------------------------------------------------------------------------------------------------------------------------------------------------------------------------------------------------------------------------------------------------------------------|
| EPI_ISL_1095317                                                                                                                                                                                                                                                                                                                                                                                       | TN Division of Laboratory Services                                                                                                                                                                                           | Centers for Disease Control and Prevention<br>Respiratory Viruses Branch, Division of Viral Diseases,<br>Centers for Disease Control and Prevention | Padilla, Sarah Nobles, Mark Burroughs, Lori Rowe, Haibin Wang, Ben L. Rambo-Martin, Dhvani Batra, Justin Lee, Suxiang Tong<br>Krista Queen, Yan Li, Ying Tao, Jing Zhang, Anna Uehara, Anna Montmayeur, Clinton R. Paden, Peter W. Cook, Rachel Marine, Mili Sheth, Jasmine Padilla, Sarah Nobles, Mark Burroughs, Lori Rowe, Haibin Wang, Ben L. Rambo-Martin, Dhvani Batra, Justin Lee, Suxiang Tong                              |
| EPI_ISL_1095318, EPI_ISL_1095320,<br>EPI_ISL_1095321, EPI_ISL_1095322,<br>EPI_ISL_1095323                                                                                                                                                                                                                                                                                                             | WA State Department of Health                                                                                                                                                                                                | Respiratory Viruses Branch, Division of Viral Diseases,<br>Centers for Disease Control and Prevention                                               | Krista Queen, Yan Li, Ying Tao, Jing Zhang, Anna Uehara, Anna Montmayeur, Clinton R. Paden, Peter W. Cook, Rachel Marine, Mili Sheth, Jasmine Padilla, Sarah Nobles, Mark Burroughs, Lori Rowe, Haibin Wang, Ben L. Rambo-Martin, Dhvani Batra, Justin Lee, Suxiang Tong                                                                                                                                                            |
| EPI_ISL_1095334, EPI_ISL_1095336, EPI_ISL_1095338, EPI_ISL_1095340, EPI_ISL_1095342, EPI_ISL_1095343, EPI_ISL_1095345, EPI_ISL_1095348, EPI_ISL_1095350, EPI_ISL_1095351, EPI_ISL_1095353, EPI_ISL_1095354, EPI_ISL_1095357, EPI_ISL_1095359, EPI_ISL_1095360, EPI_ISL_1095361                                                                                                                        | NC State Laboratory of Public Health                                                                                                                                                                                         | Respiratory Viruses Branch, Division of Viral Diseases,<br>Centers for Disease Control and Prevention                                               | Krista Queen, Yan Li, Ying Tao, Jing Zhang, Anna Uehara, Anna Montmayeur, Clinton R. Paden, Peter W. Cook, Rachel Marine, Mili Sheth, Jasmine Padilla, Sarah Nobles, Mark Burroughs, Lori Rowe, Haibin Wang, Ben L. Rambo-Martin, Dhvani Batra, Justin Lee, Suxiang Tong                                                                                                                                                            |
| see above                                                                                                                                                                                                                                                                                                                                                                                             | Virginia Division of Consolidated Laboratory Services                                                                                                                                                                        | Virginia Division of Consolidated Laboratory Services                                                                                               | Virginia DCLS                                                                                                                                                                                                                                                                                                                                                                                                                       |
| EPI_ISL_1095428, EPI_ISL_1095430,<br>EPI_ISL_1095431, EPI_ISL_1095432,<br>EPI_ISL_1095435, EPI_ISL_1095436,<br>EPI_ISL_1095437, EPI_ISL_1095440,<br>EPI_ISL_1095441, EPI_ISL_1095443                                                                                                                                                                                                                  | IAL Regional de Bauru                                                                                                                                                                                                        | Instituto Adolfo Lutz, Interdisciplinary Procedures Center,<br>Strategic Laboratory                                                                 | Claudio Tavares Sacchi, Claudia Regina Gonçalves, Erica Valesa Ramos Gomes, Karoline Rodrigues Campos, Caio Vinicius Dias Lopes                                                                                                                                                                                                                                                                                                     |
| EPI_ISL_1096123                                                                                                                                                                                                                                                                                                                                                                                       | Cambodian National Public Health Laboratory, National<br>Institute of Public Health                                                                                                                                          | Virology Unit, Institut Pasteur du Cambodge                                                                                                         | Sokhoun Yann, Ly Sovann, Kraing Sidonn, Yi Sengdoeurn, Chin Savuth, Chau Darapeak, Veasna Duong, Erik A Karlsson                                                                                                                                                                                                                                                                                                                    |
| EPI_ISL_1096140                                                                                                                                                                                                                                                                                                                                                                                       | National Virus Reference Laboratory                                                                                                                                                                                          | National Virus Reference Laboratory                                                                                                                 | Zoe Yandle, Charlene Bennet, Gabriel Gonzalez, Michael Carr, Jonathan Dean, Cillian F De Gascun                                                                                                                                                                                                                                                                                                                                     |
| EPI_ISL_1096215, EPI_ISL_1096218,<br>EPI_ISL_1096222, EPI_ISL_1096223                                                                                                                                                                                                                                                                                                                                 | Hopital                                                                                                                                                                                                                      | National Reference Center for Viruses of Respiratory<br>Infections, Institut Pasteur, Paris                                                         | Marion Barbet, Sylvie Behillil, Méline Bizard, Angela Brisebarre, Camille Capel, Etienne Simon-Lorière, Vincent Enouf, Maud Vanpeene, Sylvie van der Werf,LefeuveCaroline                                                                                                                                                                                                                                                           |
| EPI_ISL_1096258                                                                                                                                                                                                                                                                                                                                                                                       | Hopital                                                                                                                                                                                                                      | National Reference Center for Viruses of Respiratory<br>Infections, Institut Pasteur, Paris                                                         | Marion Barbet, Sylvie Behillil, Méline Bizard, Angela Brisebarre, Camille Capel, Etienne Simon-Lorière, Vincent Enouf, Maud Vanpeene, Sylvie van der Werf,Guinard Jérôme                                                                                                                                                                                                                                                            |
| EPI_ISL_1096260, EPI_ISL_1096261, EPI_ISL_1096278, EPI_ISL_1096279, EPI_ISL_1096280, EPI_ISL_1096282, EPI_ISL_1096283, EPI_ISL_1096284, EPI_ISL_1096286, EPI_ISL_1096288, EPI_ISL_1096289, EPI_ISL_1096291, EPI_ISL_1096292, EPI_ISL_1096293, EPI_ISL_1096295, EPI_ISL_1096299                                                                                                                        | Hopital                                                                                                                                                                                                                      | National Reference Center for Viruses of Respiratory<br>Infections, Institut Pasteur, Paris                                                         | Marion Barbet, Sylvie Behillil, Méline Bizard, Angela Brisebarre, Camille Capel, Etienne Simon-Lorière, Vincent Enouf, Maud Vanpeene, Sylvie van der Werf,Guinoiseau Thibault                                                                                                                                                                                                                                                       |
| see above                                                                                                                                                                                                                                                                                                                                                                                             | Hopital                                                                                                                                                                                                                      | National Reference Center for Viruses of Respiratory<br>Infections, Institut Pasteur, Paris                                                         | Marion Barbet, Sylvie Behillil, Méline Bizard, Angela Brisebarre, Camille Capel, Etienne Simon-Lorière, Vincent Enouf, Maud Vanpeene, Sylvie van der Werf,Leruez-Ville Marianne                                                                                                                                                                                                                                                     |
| EPI_ISL_1096304                                                                                                                                                                                                                                                                                                                                                                                       | Research                                                                                                                                                                                                                     | National Reference Center for Viruses of Respiratory<br>Infections, Institut Pasteur, Paris                                                         | Marion Barbet, Sylvie Behillil, Méline Bizard, Angela Brisebarre, Camille Capel, Etienne Simon-Lorière, Vincent Enouf, Maud Vanpeene, Sylvie van der Werf,Leruez-Ville Marianne                                                                                                                                                                                                                                                     |
| EPI_ISL_1096321, EPI_ISL_1096322,<br>EPI_ISL_1096323, EPI_ISL_1096324,<br>EPI_ISL_1096325, EPI_ISL_1096326,<br>EPI_ISL_1096327, EPI_ISL_1096328                                                                                                                                                                                                                                                       | Colorado Department of Public Health and Environment                                                                                                                                                                         | Colorado Department of Puplic Health and Environment                                                                                                | Laura Bankers, Molly C. Hetherington-Rauth, Diana Ir, Shannon Ely, Shannon R. Matzinger, Sarah Elizabeth Totten, Emily A. Travanty                                                                                                                                                                                                                                                                                                  |
| EPI_ISL_1097512, EPI_ISL_1097514,<br>EPI_ISL_1097516, EPI_ISL_1097517                                                                                                                                                                                                                                                                                                                                 | Eurofins Diatherix                                                                                                                                                                                                           | Hudsonalpha Genome Sequencing Center                                                                                                                | Jane Grimwood, Melissa Williams, Lori H. Handley, Joshua Stough, Leslie Malone, Stefan Brzezinski, Ada Stewart, Teresa Jones, Jenell Webber, John Lovell, Jennifer Cart, and Jeremy Schmutz                                                                                                                                                                                                                                         |
| EPI_ISL_1097723                                                                                                                                                                                                                                                                                                                                                                                       | DeRisi Lab, University of California, San Francisco                                                                                                                                                                          | DeRisi Lab, University of California, San Francisco                                                                                                 | Sabrina Mann, Anthea Mitchell, Jamin Liu, Sara Sunshine, Matthew Laurie, Genay Pilarowski, Amy Kistler, Manu Vanaerschot, Patrick Ayscue, Lucy Li, Eric Chow, IDseq Team, James Peng, Carina Marquez, Luis Rubio, Gabriel Chamie, Diane Jones, Jon Jacobo, Susana Rojas, Susy Rojas, Valerie Tulier-Laiwa, Douglas Black, Jackie Martinez, Maya Petersen, Diane Havlir, and Joseph DeRisi                                           |
| EPI_ISL_1098814, EPI_ISL_1098815                                                                                                                                                                                                                                                                                                                                                                      | Laboratory of Communicable Diseasea                                                                                                                                                                                          | Laboratory of Communicable Diseasea                                                                                                                 | Lidia Dotsenko                                                                                                                                                                                                                                                                                                                                                                                                                      |
| EPI_ISL_1098895                                                                                                                                                                                                                                                                                                                                                                                       | Lighthouse Lab in Alderley Park                                                                                                                                                                                              | Wellcome Sanger Institute for the COVID-19 Genomics UK<br>(COG-UK) Consortium                                                                       | Jacquelyn Wynn, Mairead Hyland, The Lighthouse Lab in Alderley Park and Alex Alderton, Roberto Amato, Jeffrey Barrett, Sonia Goncalves, Ewan Harrison, David K. Jackson, Ian Johnston, Dominic Kwiatkowski, Cordelia Langford, John Sillitoe on behalf of the Wellcome Sanger Institute COVID-19 Surveillance Team                                                                                                                  |
| EPI_ISL_1101110                                                                                                                                                                                                                                                                                                                                                                                       | Laboratoire central de Virologie, Centre hospitalo-universitaire<br>Ibn Sina, Hôpital des spécialités, Rabat                                                                                                                 | Laboratoire de Biotechnologie                                                                                                                       | Myriam Sefar, Hakima Kabbaj, Ghizlane EL Amin, Amal Zouaki, Mouna Ouadghiri, Tarik Aanniz, Abdelomunim Essabbar, Saaïd Amzazi, Lahcen Belyamani and Azeddine Ibrahim                                                                                                                                                                                                                                                                |
| EPI_ISL_1103569                                                                                                                                                                                                                                                                                                                                                                                       | Laboratoire central de Virologie, Centre hospitalo-universitaire<br>Ibn Sina, Hôpital des spécialités                                                                                                                        | Laboratoire de Biotechnologie                                                                                                                       | Myriam Sefar, Hakima Kabbaj, Ghizlane EL Amin, Amal Zouaki, Mouna Ouadghiri, Tarik Aanniz, Abdelomunim Essabbar, Saaïd Amzazi, Lahcen Belyamani and Azeddine Ibrahim                                                                                                                                                                                                                                                                |
| EPI_ISL_1103579                                                                                                                                                                                                                                                                                                                                                                                       | Laboratoire central de Virologie, Centre hospitalo-universitaire<br>Ibn Sina, Hôpital des spécialités                                                                                                                        | Laboratoire de Biotechnologie                                                                                                                       | Myriam Sefar, Hakima Kabbaj, Ghizlane EL Amin, Amal Zouaki, Mouna Ouadghiri, Tarik Aanniz, Abdelomunim Essabbar, Saaïd Amzazi, Lahcen Belyamani and Azeddine Ibrahim                                                                                                                                                                                                                                                                |
| EPI_ISL_1103584                                                                                                                                                                                                                                                                                                                                                                                       | University of Exeter                                                                                                                                                                                                         | COVID-19 Genomics UK (COG-UK) Consortium                                                                                                            | Ben Temperton,Aaron Jeffries,Michelle Michelsen,Joanna Warwick-Dugdale,Audrey Farbos,Robyn Manley,Stephen Michell,Jane Masoli                                                                                                                                                                                                                                                                                                       |
| EPI_ISL_1103792, EPI_ISL_1103805                                                                                                                                                                                                                                                                                                                                                                      | Department of Pathology, University of Cambridge                                                                                                                                                                             | COVID-19 Genomics UK (COG-UK) Consortium                                                                                                            | Aminu S. Jahun, Yasmin Chaudhry, Ilana Georgana, Myra Hosmillo, Rhys Izuagbe, William L. Hamilton, Martin D. Curran, Surendra Parmar, Ian Goodfellow                                                                                                                                                                                                                                                                                |
| EPI_ISL_1103888, EPI_ISL_1103937,<br>EPI_ISL_1103938, EPI_ISL_1103939,<br>EPI_ISL_1103940, EPI_ISL_1103942,<br>EPI_ISL_1103943, EPI_ISL_1103947                                                                                                                                                                                                                                                       | Northumbria University / South Tees Hospitals NHS<br>Foundation Trust / North Cumbria Integrated Care NHS<br>Foundation Trust / North Tees and Hartlepool NHS<br>Foundation Trust / Newcastle Hospitals NHS Foundation Trust | COVID-19 Genomics UK (COG-UK) Consortium                                                                                                            | Darren L Smith,Andrew Nelson,Matthew Bashton,Greg R Young,Joshua Loh,John Allan,Mohammad A Tariq,Giles S Holt,Gary Black,Wen C Yew,Lynn Dover,Paul Baker,Steve Liggett,Sarah Essex,Jane Greenaway,Debra Padgett,Clive Graham,Garren Scott,Edward Barton,Emma Swindells,Brendan Payne,Jennifer Collins,Yusri Taha,Gary Eltringham                                                                                                    |
| EPI_ISL_1104025, EPI_ISL_1104027, EPI_ISL_1104028, EPI_ISL_1104032, EPI_ISL_1104034, EPI_ISL_1104035, EPI_ISL_1104036, EPI_ISL_1104040, EPI_ISL_1104041, EPI_ISL_1104044, EPI_ISL_1104045, EPI_ISL_1104046, EPI_ISL_1104051, EPI_ISL_1104052, EPI_ISL_1104056, EPI_ISL_1104058, EPI_ISL_1104059, EPI_ISL_1104060, EPI_ISL_1104062, EPI_ISL_1104063, EPI_ISL_1104068, EPI_ISL_1104069, EPI_ISL_1104071 | Virology Department, Sheffield Teaching Hospitals NHS<br>Foundation Trust/Department of Infection, Immunity and<br>Cardiovascular Disease, The Medical School, University of<br>Sheffield                                    | COVID-19 Genomics UK (COG-UK) Consortium                                                                                                            | Thushan de Silva, Matthew Parker, Nikki Smith, Adri Angyal, Rebecca Brown, Luke Green, Rachel Tucker, Paul Parsons, Danielle Groves, Katie Johnson, Laura Carrilero, Alex Keeley, Dave Partridge, Matthew Wyles, Benjamin Lindsey, Mehmet Yavuz, Mohammad Raza, Cariad Evans                                                                                                                                                        |
| see above                                                                                                                                                                                                                                                                                                                                                                                             | Lighthouse Lab in Glasgow / MRC-University of Glasgow<br>Centre for Virus Research                                                                                                                                           | COVID-19 Genomics UK (COG-UK) Consortium                                                                                                            | Ana da Silva Filipe, Natasha Johnson, Kathy Smollett, Daniel Mair, Stephen Carmichael, Alice Broos, Lily Tong, Jenna Nichols, Kyriaki Nomikou; Sarah McDonald; Harper VanSteenhouse, Yumi Kasai, David Gray, Carol Clugston, Anna Dominiczak; Alasdair MacLean, Rory Gunson; Richard Orton, Joseph Hughes, Sreenu Vattipally, David L Robertson; Sharif Shaaban, Matthew Holden; Kathy Li, James Shepherd, Antonia Ho, Emma Thomson |
| EPI_ISL_1104104, EPI_ISL_1104107,<br>EPI_ISL_1104108, EPI_ISL_1104109,<br>EPI_ISL_1104110, EPI_ISL_1104111,<br>EPI_ISL_1104118, EPI_ISL_1104120,<br>EPI_ISL_1104122                                                                                                                                                                                                                                   | COVID-19 Genomics UK (COG-UK) Consortium                                                                                                                                                                                     | McHugh M, Dewar R, Cotton S, Rooke S, O'Toole Á, Scher E, Hill V, McCrone JT, Colquhoun R, Yu X, Jackson B, Rambaut A, Templeton K                  |                                                                                                                                                                                                                                                                                                                                                                                                                                     |
| EPI_ISL_1104197, EPI_ISL_1104217, EPI_ISL_1104220, EPI_ISL_1104223, EPI_ISL_1104227, EPI_ISL_1104228, EPI_ISL_1104229, EPI_ISL_1104231, EPI_ISL_1104234, EPI_ISL_1104235, EPI_ISL_1104236, EPI_ISL_1104243, EPI_ISL_1104262, EPI_ISL_1104263                                                                                                                                                          | Virology Department, Royal Infirmary of Edinburgh, NHS<br>Lothian / School of Biological Sciences, University of<br>Edinburgh                                                                                                | COVID-19 Genomics UK (COG-UK) Consortium                                                                                                            | McHugh M, Dewar R, Cotton S, Rooke S, O'Toole Á, Scher E, Hill V, McCrone JT, Colquhoun R, Yu X, Jackson B, Rambaut A, Templeton K                                                                                                                                                                                                                                                                                                  |
| see above                                                                                                                                                                                                                                                                                                                                                                                             |                                                                                                                                                                                                                              |                                                                                                                                                     |                                                                                                                                                                                                                                                                                                                                                                                                                                     |
| EPI_ISL_1104776, EPI_ISL_1104785, EPI_ISL_1104788, EPI_ISL_1104799, EPI_ISL_1104801, EPI_ISL_1104804, EPI_ISL_1104809, EPI_ISL_1104810, EPI_ISL_1104811, EPI_ISL_1104813, EPI_ISL_1104815, EPI_ISL_1104820, EPI_ISL_1104828, EPI_ISL_1104831, EPI_ISL_1104833, EPI_ISL_1104836, EPI_ISL_1104845,                                                                                                      |                                                                                                                                                                                                                              |                                                                                                                                                     |                                                                                                                                                                                                                                                                                                                                                                                                                                     |

|                                                                                                                                                                                                                                                                                                                                                                                                                                                                                                                                                                                                                                                                                                                                                                                                                                                                                                                    |                                                                                                                                                                                                                     |                                                                                             |                                                                                                                                                                                                                                                                                                                                                         |
|--------------------------------------------------------------------------------------------------------------------------------------------------------------------------------------------------------------------------------------------------------------------------------------------------------------------------------------------------------------------------------------------------------------------------------------------------------------------------------------------------------------------------------------------------------------------------------------------------------------------------------------------------------------------------------------------------------------------------------------------------------------------------------------------------------------------------------------------------------------------------------------------------------------------|---------------------------------------------------------------------------------------------------------------------------------------------------------------------------------------------------------------------|---------------------------------------------------------------------------------------------|---------------------------------------------------------------------------------------------------------------------------------------------------------------------------------------------------------------------------------------------------------------------------------------------------------------------------------------------------------|
| EPI_ISL_1104850, EPI_ISL_1104852, EPI_ISL_1104858, EPI_ISL_1104860, EPI_ISL_1104862, EPI_ISL_1104879, EPI_ISL_1104901, EPI_ISL_1104916, EPI_ISL_1104939, EPI_ISL_1104955, EPI_ISL_1104967, EPI_ISL_1104970, EPI_ISL_1104974, EPI_ISL_1105008, EPI_ISL_1105017, EPI_ISL_1105025, EPI_ISL_1105033, EPI_ISL_1105042, EPI_ISL_1105060, EPI_ISL_1105079, EPI_ISL_1105151, EPI_ISL_1105156, EPI_ISL_1105159, EPI_ISL_1105168, EPI_ISL_1105176, EPI_ISL_1105194, EPI_ISL_1105198, EPI_ISL_1105200, EPI_ISL_1105201, EPI_ISL_1105208, EPI_ISL_1105220, EPI_ISL_1105250, EPI_ISL_1105264, EPI_ISL_1105265, EPI_ISL_1105268, EPI_ISL_1105272, EPI_ISL_1105276, EPI_ISL_1105284, EPI_ISL_1105288, EPI_ISL_1105289, EPI_ISL_1105297, EPI_ISL_1105324, EPI_ISL_1105332, EPI_ISL_1105347                                                                                                                                         |                                                                                                                                                                                                                     |                                                                                             |                                                                                                                                                                                                                                                                                                                                                         |
| see above                                                                                                                                                                                                                                                                                                                                                                                                                                                                                                                                                                                                                                                                                                                                                                                                                                                                                                          | University College London Hospital                                                                                                                                                                                  | COVID-19 Genomics UK (COG-UK) Consortium                                                    | Judith Heaney, Matthew Byott, Catherine Houlihan, Dan Frampton, Stuart Kirk, Moira Spyer and Eleni Nastouli                                                                                                                                                                                                                                             |
| EPI_ISL_1105475, EPI_ISL_1105478, EPI_ISL_1105491, EPI_ISL_1105499, EPI_ISL_1105700, EPI_ISL_1105791                                                                                                                                                                                                                                                                                                                                                                                                                                                                                                                                                                                                                                                                                                                                                                                                               | Northumbria University / South Tees Hospitals NHS Foundation Trust / North Cumbria Integrated Care NHS Foundation Trust / North Tees and Hartlepool NHS Foundation Trust / Newcastle Hospitals NHS Foundation Trust | COVID-19 Genomics UK (COG-UK) Consortium                                                    | Darren L Smith, Andrew Nelson, Matthew Bashton, Greg R Young, Joshua Loh, John Allan, Mohammad A Tariq, Giles S Holt, Gary Black, Wen C Yew, Lynn Dover, Paul Baker, Steve Liggett, Sarah Essex, Jane Greenaway, Debra Padgett, Clive Graham, Garren Scott, Edward Barton, Emma Swindells, Brendan Payne, Jennifer Collins, Yusri Taha, Gary Eltringham |
| EPI_ISL_1105847, EPI_ISL_1105851, EPI_ISL_1105858, EPI_ISL_1105863, EPI_ISL_1105864, EPI_ISL_1105865, EPI_ISL_1105867, EPI_ISL_1105871, EPI_ISL_1105883, EPI_ISL_1105885, EPI_ISL_1105893, EPI_ISL_1105895                                                                                                                                                                                                                                                                                                                                                                                                                                                                                                                                                                                                                                                                                                         |                                                                                                                                                                                                                     |                                                                                             |                                                                                                                                                                                                                                                                                                                                                         |
| see above                                                                                                                                                                                                                                                                                                                                                                                                                                                                                                                                                                                                                                                                                                                                                                                                                                                                                                          | Lincolnshire Hospitals and DeepSeq Nottingham                                                                                                                                                                       | COVID-19 Genomics UK (COG-UK) Consortium                                                    | Nichola Duckworth, Tim Sloan, Sarah Walsh, Jonathan Ball, Patrick McClure, Joseph Chappell, Nadine Holmes, Matthew Carlisle, Christopher Moore, Fei Sang, Johnny Debebe, Victoria Wright, Matthew Loose                                                                                                                                                 |
| EPI_ISL_1105946                                                                                                                                                                                                                                                                                                                                                                                                                                                                                                                                                                                                                                                                                                                                                                                                                                                                                                    | Laboratoire central de Virologie, Centre hospitalo-universitaire Ibn Sina Hôpital des spécialités                                                                                                                   | Laboratoire de Biotechnologie                                                               | Myriam Seffar, Hakima Kabbaj, Ghizlane EL Amin, Amal Zouaki, Mouna Quadghiri, Tarik Aanniz, Abdelmunim Essabbar, Saaïd Amzazi, Lahcen Belyamani and Azeddine Ibrahim                                                                                                                                                                                    |
| EPI_ISL_1107189                                                                                                                                                                                                                                                                                                                                                                                                                                                                                                                                                                                                                                                                                                                                                                                                                                                                                                    | Laboratoire central de Virologie                                                                                                                                                                                    | Laboratoire de Biotechnologie                                                               | Hakima Kabbaj, Myriam Seffar, Ghizlane EL Amin, Amal Zouaki, Abdelmunim Essabbar, Tarik Aanniz, Mouna Quadghiri, Saaïd Amzazi, Lahcen Belyamani and Azeddine Ibrahim                                                                                                                                                                                    |
| EPI_ISL_1107586, EPI_ISL_1107632, EPI_ISL_1107635, EPI_ISL_1107653, EPI_ISL_1107661                                                                                                                                                                                                                                                                                                                                                                                                                                                                                                                                                                                                                                                                                                                                                                                                                                | Centre for Enzyme Innovation, University of Portsmouth / Translational Research Laboratory, Portsmouth Hospitals NHS Trust                                                                                          | COVID-19 Genomics UK (COG-UK) Consortium                                                    | Angela Beckett, Salman Goudarzi, Christopher Fearn, Kate Cook, Katie Loveson, Sharon Glaysheer, Scott Elliott, Samuel Robson                                                                                                                                                                                                                            |
| EPI_ISL_1108961, EPI_ISL_1108971, EPI_ISL_1108973, EPI_ISL_1109001                                                                                                                                                                                                                                                                                                                                                                                                                                                                                                                                                                                                                                                                                                                                                                                                                                                 | Queens Medical Centre, Clinical Microbiology Department / DeepSeq Nottingham                                                                                                                                        | COVID-19 Genomics UK (COG-UK) Consortium                                                    | Gemma Clark, Wendy Smith, Manjinder Khakh, Vicki M Fleming, Michelle M Lister, Hannah Howson-Wells, Jonathan Ball, Patrick McClure, Joseph Chappell, Theocharis Tsoeridis, Nadine Holmes, Matthew Carlisle, Christopher Moore, Fei Sang, Johnny Debebe, Victoria Wright, Matthew Loose                                                                  |
| EPI_ISL_1109497                                                                                                                                                                                                                                                                                                                                                                                                                                                                                                                                                                                                                                                                                                                                                                                                                                                                                                    | Croatian Institute of Public Health                                                                                                                                                                                 | Croatian Institute of Public Health                                                         | Irena Tabain, Ivana Ferenak                                                                                                                                                                                                                                                                                                                             |
| EPI_ISL_1109531, EPI_ISL_1109532, EPI_ISL_1109533                                                                                                                                                                                                                                                                                                                                                                                                                                                                                                                                                                                                                                                                                                                                                                                                                                                                  | University Hospital for Infectious Diseases                                                                                                                                                                         | Croatian Institute of Public Health                                                         | Irena Tabain, Ivana Ferenak                                                                                                                                                                                                                                                                                                                             |
| EPI_ISL_1109622                                                                                                                                                                                                                                                                                                                                                                                                                                                                                                                                                                                                                                                                                                                                                                                                                                                                                                    | Laboratoire central de Virologie                                                                                                                                                                                    | Laboratoire de Biotechnologie                                                               | Hakima Kabbaj, Myriam Seffar, Ghizlane EL Amin, Amal Zouaki, Abdelmunim Essabbar, Tarik Aanniz, Mouna Quadghiri, Saaïd Amzazi, Lahcen Belyamani and Azeddine Ibrahim                                                                                                                                                                                    |
| EPI_ISL_1109623                                                                                                                                                                                                                                                                                                                                                                                                                                                                                                                                                                                                                                                                                                                                                                                                                                                                                                    | Laboratoire central de Virologie                                                                                                                                                                                    | Laboratoire de Biotechnologie                                                               | Hakima Kabbaj, Myriam Seffar, Ghizlane EL Amin, Amal Zouaki, Abdelmunim Essabbar, Tarik Aanniz, Mouna Quadghiri, Saaïd Amzazi, Lahcen Belyamani and Azeddine Ibrahim                                                                                                                                                                                    |
| EPI_ISL_1109734                                                                                                                                                                                                                                                                                                                                                                                                                                                                                                                                                                                                                                                                                                                                                                                                                                                                                                    | Servicio de Microbiología. Hospital Arnau de Vilanova                                                                                                                                                               | SeqCOVID-SPAIN consortium/IBV(CSIC)                                                         | Victoria Domínguez, Rocío Falcón, Amparo Farga and SeqCOVID-SPAIN consortium                                                                                                                                                                                                                                                                            |
| EPI_ISL_1109810, EPI_ISL_1109822, EPI_ISL_1109841, EPI_ISL_1109864, EPI_ISL_1109868, EPI_ISL_1109869, EPI_ISL_1109870, EPI_ISL_1109871, EPI_ISL_1109872, EPI_ISL_1109873, EPI_ISL_1109875, EPI_ISL_1109876, EPI_ISL_1109877, EPI_ISL_1109897                                                                                                                                                                                                                                                                                                                                                                                                                                                                                                                                                                                                                                                                       |                                                                                                                                                                                                                     |                                                                                             |                                                                                                                                                                                                                                                                                                                                                         |
| see above                                                                                                                                                                                                                                                                                                                                                                                                                                                                                                                                                                                                                                                                                                                                                                                                                                                                                                          | Lab voor klinische biologie                                                                                                                                                                                         | Lab voor klinische biologie                                                                 | Marija Janevska, Hannelore Hamerlinck, Bruno Verhasselt                                                                                                                                                                                                                                                                                                 |
| EPI_ISL_1110008                                                                                                                                                                                                                                                                                                                                                                                                                                                                                                                                                                                                                                                                                                                                                                                                                                                                                                    | MEPHI, Aix Marseille University                                                                                                                                                                                     | MEPHI, Aix Marseille University                                                             | Anthony LEVASSEUR                                                                                                                                                                                                                                                                                                                                       |
| EPI_ISL_1110039, EPI_ISL_1110040, EPI_ISL_1110051, EPI_ISL_1110057, EPI_ISL_1110058, EPI_ISL_1110060, EPI_ISL_1110121, EPI_ISL_1110122, EPI_ISL_1110123, EPI_ISL_1110124, EPI_ISL_1110125, EPI_ISL_1110126, EPI_ISL_1110127, EPI_ISL_1110128, EPI_ISL_1110129, EPI_ISL_1110130, EPI_ISL_1110131, EPI_ISL_1110132, EPI_ISL_1110134, EPI_ISL_1110135, EPI_ISL_1110137                                                                                                                                                                                                                                                                                                                                                                                                                                                                                                                                                |                                                                                                                                                                                                                     |                                                                                             |                                                                                                                                                                                                                                                                                                                                                         |
| see above                                                                                                                                                                                                                                                                                                                                                                                                                                                                                                                                                                                                                                                                                                                                                                                                                                                                                                          | UW Virology Lab                                                                                                                                                                                                     | UW Virology Lab                                                                             | Pavitra Roychoudhury, Hong Xie, Lasata Shrestha, Shah Mohamed Bakhsh, Michelle Lin, Noah Baker, Meei-Li Huang, Keith R Jerome, Alexander Greninger                                                                                                                                                                                                      |
| EPI_ISL_1110237                                                                                                                                                                                                                                                                                                                                                                                                                                                                                                                                                                                                                                                                                                                                                                                                                                                                                                    | Hospital de Sagunto                                                                                                                                                                                                 | SeqCOVID-SPAIN consortium/IBV(CSIC)                                                         | Noelia Lozano Rodríguez, Sandra Moreno and SeqCOVID-SPAIN consortium                                                                                                                                                                                                                                                                                    |
| EPI_ISL_1110294                                                                                                                                                                                                                                                                                                                                                                                                                                                                                                                                                                                                                                                                                                                                                                                                                                                                                                    | Baylor Scott & White-Temple                                                                                                                                                                                         | Baylor Scott & White-Temple                                                                 | Ari Rao, Linden Morales, Kimberly Walker, Marcus Volz, Shelby Hendrickson                                                                                                                                                                                                                                                                               |
| EPI_ISL_1110413, EPI_ISL_1110437, EPI_ISL_1110438, EPI_ISL_1110440, EPI_ISL_1110495, EPI_ISL_1110496, EPI_ISL_1110497, EPI_ISL_1110498, EPI_ISL_1110499, EPI_ISL_1110500, EPI_ISL_1110501, EPI_ISL_1110502, EPI_ISL_1110503, EPI_ISL_1110504, EPI_ISL_1110507, EPI_ISL_1110508, EPI_ISL_1110509                                                                                                                                                                                                                                                                                                                                                                                                                                                                                                                                                                                                                    |                                                                                                                                                                                                                     |                                                                                             |                                                                                                                                                                                                                                                                                                                                                         |
| see above                                                                                                                                                                                                                                                                                                                                                                                                                                                                                                                                                                                                                                                                                                                                                                                                                                                                                                          | Hopital                                                                                                                                                                                                             | National Reference Center for Viruses of Respiratory Infections, Institut Pasteur, Paris    | Marion Barbet, Sylvie Behillil, Méline Bizard, Angela Brisebarre, Camille Capel, Etienne Simon-Lorière, Vincent Enouf, Maud Vanpeene, Sylvie van der Werf, Pilorge LéA                                                                                                                                                                                  |
| EPI_ISL_1110530                                                                                                                                                                                                                                                                                                                                                                                                                                                                                                                                                                                                                                                                                                                                                                                                                                                                                                    | Akershus University Hospital, Department for Microbiology and Infectious Disease Control                                                                                                                            | Norwegian Institute of Public Health, Department of Virology                                | Kathrine Stene-Johansen, Kamilla Heddeland Instefjord, Hilde Elshaug, Garcia Llorente Ignacio, Engebretsen Serina Beate, Pedersen Benedikte Nevjen, Debech Nadia, Atiya R Ali, Marie Paulsen Madsen, Rasmus Riis Kopperud, Hilde Vollan, Karoline Bragstad, Olav Hungnes                                                                                |
| EPI_ISL_1110601                                                                                                                                                                                                                                                                                                                                                                                                                                                                                                                                                                                                                                                                                                                                                                                                                                                                                                    | Ospedale Civile Teramo                                                                                                                                                                                              | Istituto Zooprofilattico Sperimentale dell'Abruzzo e Molise "G. Caporale"                   | Lorusso A, Marcacci M, Di Domenico M, Ancora M, Curini V, Mangone I, Rinaldi A, Scialabba S, Di Pasquale A, Cammà C, Puglia I, Calistri P, Savini G                                                                                                                                                                                                     |
| EPI_ISL_1110834, EPI_ISL_1110835, EPI_ISL_1110837, EPI_ISL_1110839, EPI_ISL_1110846, EPI_ISL_1110850, EPI_ISL_1110853, EPI_ISL_1110854, EPI_ISL_1110855, EPI_ISL_1110857, EPI_ISL_1110858, EPI_ISL_1110859, EPI_ISL_1110861, EPI_ISL_1110862, EPI_ISL_1110865, EPI_ISL_1110866, EPI_ISL_1110868, EPI_ISL_1110870                                                                                                                                                                                                                                                                                                                                                                                                                                                                                                                                                                                                   |                                                                                                                                                                                                                     |                                                                                             |                                                                                                                                                                                                                                                                                                                                                         |
| see above                                                                                                                                                                                                                                                                                                                                                                                                                                                                                                                                                                                                                                                                                                                                                                                                                                                                                                          | Virginia Division of Consolidated Laboratory Services                                                                                                                                                               | Virginia Division of Consolidated Laboratory Services                                       | Virginia DCLS                                                                                                                                                                                                                                                                                                                                           |
| EPI_ISL_1110899, EPI_ISL_1110900, EPI_ISL_1110901, EPI_ISL_1110929, EPI_ISL_1110930, EPI_ISL_1110931, EPI_ISL_1110957, EPI_ISL_1110958, EPI_ISL_1110967, EPI_ISL_1110981, EPI_ISL_1110982, EPI_ISL_1110983, EPI_ISL_1110984, EPI_ISL_1110985, EPI_ISL_1110986, EPI_ISL_1110987, EPI_ISL_1110988, EPI_ISL_1110989, EPI_ISL_1110990, EPI_ISL_1110991, EPI_ISL_1110992, EPI_ISL_1110993, EPI_ISL_1110994, EPI_ISL_1110995, EPI_ISL_1110996, EPI_ISL_1110997, EPI_ISL_1110998, EPI_ISL_1110999, EPI_ISL_1111000, EPI_ISL_1111001, EPI_ISL_1111002, EPI_ISL_1111003, EPI_ISL_1111004, EPI_ISL_1111005, EPI_ISL_1111006, EPI_ISL_1111007, EPI_ISL_1111008, EPI_ISL_1111009, EPI_ISL_1111010                                                                                                                                                                                                                              |                                                                                                                                                                                                                     |                                                                                             |                                                                                                                                                                                                                                                                                                                                                         |
| see above                                                                                                                                                                                                                                                                                                                                                                                                                                                                                                                                                                                                                                                                                                                                                                                                                                                                                                          | Hopital                                                                                                                                                                                                             | National Reference Center for Viruses of Respiratory Infections, Institut Pasteur, Paris    | Marion Barbet, Sylvie Behillil, Méline Bizard, Angela Brisebarre, Camille Capel, Etienne Simon-Lorière, Vincent Enouf, Maud Vanpeene, Sylvie van der Werf, Pilorge LéA                                                                                                                                                                                  |
| EPI_ISL_1111069, EPI_ISL_1111128, EPI_ISL_1111129, EPI_ISL_1111160, EPI_ISL_1111161, EPI_ISL_1111281, EPI_ISL_1111282, EPI_ISL_1111287, EPI_ISL_1111288, EPI_ISL_1111289, EPI_ISL_1111291, EPI_ISL_1111293, EPI_ISL_1111297, EPI_ISL_1111299, EPI_ISL_1111301, EPI_ISL_1111302, EPI_ISL_1111304, EPI_ISL_1111306, EPI_ISL_1111317, EPI_ISL_1111322, EPI_ISL_1111325, EPI_ISL_1111326, EPI_ISL_1111327, EPI_ISL_1111332, EPI_ISL_1111334, EPI_ISL_1111338, EPI_ISL_1111339, EPI_ISL_1111348, EPI_ISL_1111351, EPI_ISL_1111353, EPI_ISL_1111354, EPI_ISL_1111448, EPI_ISL_1111449, EPI_ISL_1111450, EPI_ISL_1111452, EPI_ISL_1111453, EPI_ISL_1111455, EPI_ISL_1111460, EPI_ISL_1111461, EPI_ISL_1111465, EPI_ISL_1111466, EPI_ISL_1111468, EPI_ISL_1111469, EPI_ISL_1111472, EPI_ISL_1111473, EPI_ISL_1111474, EPI_ISL_1111475, EPI_ISL_1111490, EPI_ISL_1111496, EPI_ISL_1111501, EPI_ISL_1111504, EPI_ISL_1111505 |                                                                                                                                                                                                                     |                                                                                             |                                                                                                                                                                                                                                                                                                                                                         |
| see above                                                                                                                                                                                                                                                                                                                                                                                                                                                                                                                                                                                                                                                                                                                                                                                                                                                                                                          | Laboratorio de Referencia Nacional de Virus Respiratorio. Instituto Nacional de Salud Perú                                                                                                                          | Laboratorio de Referencia Nacional de Enteropatógenos. Instituto Nacional de Salud del Perú | Ronnie Gavilan Chavez, Junior Caro Castro, Willi Quino Sifuentes, Veronica Hurtado Vela, Iris Silva Molina, Fiorella Orellana Peralta                                                                                                                                                                                                                   |
| EPI_ISL_1111514, EPI_ISL_1111515, EPI_ISL_1111519, EPI_ISL_1111522, EPI_ISL_1111563, EPI_ISL_1111579                                                                                                                                                                                                                                                                                                                                                                                                                                                                                                                                                                                                                                                                                                                                                                                                               | Virginia Division of Consolidated Laboratory Services                                                                                                                                                               | Virginia Division of Consolidated Laboratory Services                                       | Virginia DCLS                                                                                                                                                                                                                                                                                                                                           |
| EPI_ISL_1112227                                                                                                                                                                                                                                                                                                                                                                                                                                                                                                                                                                                                                                                                                                                                                                                                                                                                                                    | Istituto Zooprofilattico Sperimentale della Puglia e della Basilicata                                                                                                                                               | Istituto Zooprofilattico Sperimentale della Puglia e della Basilicata                       | Parisi A., Bianco A., Capozzi L., Del Sambro L., Simone D., Giannico A., Ridolfi D.                                                                                                                                                                                                                                                                     |
| EPI_ISL_1112235                                                                                                                                                                                                                                                                                                                                                                                                                                                                                                                                                                                                                                                                                                                                                                                                                                                                                                    | Ospedali Riuniti Azienda Ospedaliera Universitaria - Foggia                                                                                                                                                         | Istituto Zooprofilattico Sperimentale della Puglia e della Basilicata                       | Parisi A., Bianco A., Capozzi L., Del Sambro L., Simone D., Giannico A., Ridolfi D.                                                                                                                                                                                                                                                                     |
| EPI_ISL_1112294, EPI_ISL_1112296, EPI_ISL_1112297, EPI_ISL_1112298, EPI_ISL_1112299, EPI_ISL_1112300, EPI_ISL_1112301, EPI_ISL_1112303, EPI_ISL_1112304, EPI_ISL_1112306, EPI_ISL_1112309, EPI_ISL_1112310, EPI_ISL_1112311, EPI_ISL_1112312, EPI_ISL_1112315, EPI_ISL_1112316, EPI_ISL_1112317, EPI_ISL_1112318, EPI_ISL_1112320, EPI_ISL_1112321, EPI_ISL_1112323, EPI_ISL_1112325, EPI_ISL_1112326, EPI_ISL_1112328, EPI_ISL_1112330, EPI_ISL_1112331, EPI_ISL_1112332, EPI_ISL_1112333, EPI_ISL_1112334, EPI_ISL_1112335, EPI_ISL_1112336, EPI_ISL_1112337, EPI_ISL_1112338, EPI_ISL_1112339                                                                                                                                                                                                                                                                                                                   |                                                                                                                                                                                                                     |                                                                                             |                                                                                                                                                                                                                                                                                                                                                         |
| see above                                                                                                                                                                                                                                                                                                                                                                                                                                                                                                                                                                                                                                                                                                                                                                                                                                                                                                          | Public Health Center of Ukraine                                                                                                                                                                                     | Charité Universitätsmedizin Berlin, Institute of Virology                                   | Victor M Corman, Barbara Mühlemann, Jörn Beheim-Schwarzbach, Talitha Veith, Julia Schneider, Terry Jones, Roman Rodyna, Ihor Kuzin, Liudmyla Chernenko, Iryna Demchyshyna, Christian Drosten                                                                                                                                                            |
| EPI_ISL_1113137                                                                                                                                                                                                                                                                                                                                                                                                                                                                                                                                                                                                                                                                                                                                                                                                                                                                                                    | Rocky Mountain Laboratories                                                                                                                                                                                         | Rocky Mountain Laboratories                                                                 | van Doremalen, N., Holbrook, M.G., Barbian, K.D., Bushmaker, C., Bushmaker, T., Martens, C.A. and Munster, V.J.                                                                                                                                                                                                                                         |

|                                                                                                                                                                                                                                                                                                                                                                                                                                                                                                                                                                                                                                    |                                                                                                                                          |                                                                                                                                |                                                                                                                                                                                                                                                                  |
|------------------------------------------------------------------------------------------------------------------------------------------------------------------------------------------------------------------------------------------------------------------------------------------------------------------------------------------------------------------------------------------------------------------------------------------------------------------------------------------------------------------------------------------------------------------------------------------------------------------------------------|------------------------------------------------------------------------------------------------------------------------------------------|--------------------------------------------------------------------------------------------------------------------------------|------------------------------------------------------------------------------------------------------------------------------------------------------------------------------------------------------------------------------------------------------------------|
| EPI_ISL_1113178, EPI_ISL_1113179                                                                                                                                                                                                                                                                                                                                                                                                                                                                                                                                                                                                   | Gundersen Molecular Diagnostics Laboratory                                                                                               | Kabara Cancer Research Institute                                                                                               | Craig S. Richmond, Paraic A. Kenny                                                                                                                                                                                                                               |
| EPI_ISL_1113182                                                                                                                                                                                                                                                                                                                                                                                                                                                                                                                                                                                                                    | Gundersen Clinical Microbiology Laboratory                                                                                               | Kabara Cancer Research Institute                                                                                               | Craig S. Richmond, Paraic A. Kenny                                                                                                                                                                                                                               |
| EPI_ISL_1114391                                                                                                                                                                                                                                                                                                                                                                                                                                                                                                                                                                                                                    | Wyoming Public Health Laboratory                                                                                                         | Wyoming Public Health Laboratory                                                                                               | Jim Mildenberger, Wanda Manley, Noah Hull, Taylor Fearing, Lynette Gumbleton, Channing Weber, Ashley Norberg, Chayse Rowley, Marley Goetz, Brian Dominguez, Elliot Thomasson, Cari Sloma, and Rob Christensen                                                    |
| EPI_ISL_1114717, EPI_ISL_1114718, EPI_ISL_1114719, EPI_ISL_1114720, EPI_ISL_1114721, EPI_ISL_1114722, EPI_ISL_1114723, EPI_ISL_1114724                                                                                                                                                                                                                                                                                                                                                                                                                                                                                             | Institute for Medical Research, Infectious Disease Research Centre, National Institutes of Health, Ministry of Health Malaysia           | Institute for Medical Research, Infectious Disease Research Centre, National Institutes of Health, Ministry of Health Malaysia | Suppiah J, Kamel K, Azizan MA, Thayan R                                                                                                                                                                                                                          |
| EPI_ISL_1116465                                                                                                                                                                                                                                                                                                                                                                                                                                                                                                                                                                                                                    | Laboratoire central de Virologie                                                                                                         | Laboratoire de Biotechnologie                                                                                                  | Ghizlane EL Amin, Hakima Kabbaj, Myriam Seffar, Amal Zouaki, Abdelmunim Essabbar, Tarik Aanniz, Mouna Quadghiri, Saaïd Amzazi, Lahcen Belyamani and Azeddine Ibrahim                                                                                             |
| EPI_ISL_1116555                                                                                                                                                                                                                                                                                                                                                                                                                                                                                                                                                                                                                    | Laboratoire central de Virologie                                                                                                         | Laboratoire de Biotechnologie                                                                                                  | Ghizlane EL Amin, Myriam Seffar, Hakima Kabbaj, Amal Zouaki, Abdelmunim Essabbar, Tarik Aanniz, Mouna Quadghiri, Saaïd Amzazi, Lahcen Belyamani and Azeddine Ibrahim                                                                                             |
| EPI_ISL_1116758                                                                                                                                                                                                                                                                                                                                                                                                                                                                                                                                                                                                                    | Biolab Diagnostic Laboratories                                                                                                           | Biolab Diagnostic Laboratories                                                                                                 | Issa Abu-Dayyeh, Ahmad Tibi, Lama Hussein, Shayma Ali, Badia Sadeddin, Eiad Atwa, Amid Abdelnour                                                                                                                                                                 |
| EPI_ISL_1116827, EPI_ISL_1116828, EPI_ISL_1116829, EPI_ISL_1116830, EPI_ISL_1116831                                                                                                                                                                                                                                                                                                                                                                                                                                                                                                                                                | Instituto Nacional de Saude (INSA) and Instituto Gulbenkian de Ciencia (IGC)                                                             | Instituto Nacional de Saude (INSA) and Instituto Gulbenkian de Ciencia (IGC)                                                   | Borges et al                                                                                                                                                                                                                                                     |
| EPI_ISL_1116894, EPI_ISL_1116895                                                                                                                                                                                                                                                                                                                                                                                                                                                                                                                                                                                                   | Instituto Nacional de Saude (INSA)                                                                                                       | Instituto Nacional de Saude (INSA)                                                                                             | Borges et al                                                                                                                                                                                                                                                     |
| EPI_ISL_1116974, EPI_ISL_1116975, EPI_ISL_1116976, EPI_ISL_1116978, EPI_ISL_1116979, EPI_ISL_1116980                                                                                                                                                                                                                                                                                                                                                                                                                                                                                                                               | Instituto Nacional de Saude (INSA) and Instituto Gulbenkian de Ciencia (IGC)                                                             | Instituto Nacional de Saude (INSA) and Instituto Gulbenkian de Ciencia (IGC)                                                   | Borges et al                                                                                                                                                                                                                                                     |
| EPI_ISL_1117221                                                                                                                                                                                                                                                                                                                                                                                                                                                                                                                                                                                                                    | Instituto Nacional de Saude (INSA)                                                                                                       | Instituto Nacional de Saude (INSA)                                                                                             | Borges et al                                                                                                                                                                                                                                                     |
| EPI_ISL_1117257, EPI_ISL_1117258, EPI_ISL_1117260, EPI_ISL_1117261, EPI_ISL_1117262, EPI_ISL_1117263, EPI_ISL_1117264, EPI_ISL_1117265, EPI_ISL_1117266, EPI_ISL_1117267, EPI_ISL_1117268, EPI_ISL_1117269, EPI_ISL_1117270, EPI_ISL_1117271, EPI_ISL_1117272, EPI_ISL_1117298                                                                                                                                                                                                                                                                                                                                                     | Instituto Nacional de Saude (INSA) and Instituto Gulbenkian de Ciencia (IGC)                                                             | Instituto Nacional de Saude (INSA) and Instituto Gulbenkian de Ciencia (IGC)                                                   | Borges et al                                                                                                                                                                                                                                                     |
| see above                                                                                                                                                                                                                                                                                                                                                                                                                                                                                                                                                                                                                          | Instituto Nacional de Saude (INSA) and Instituto Gulbenkian de Ciencia (IGC)                                                             | Instituto Nacional de Saude (INSA) and Instituto Gulbenkian de Ciencia (IGC)                                                   | Borges et al                                                                                                                                                                                                                                                     |
| EPI_ISL_1117527, EPI_ISL_1117528                                                                                                                                                                                                                                                                                                                                                                                                                                                                                                                                                                                                   | Thai Red Cross Emerging Infectious Diseases Health Science Centre, Chulalongkorn Hospital, Faculty of Medicine, Chulalongkorn University | Thai Red Cross Emerging Infectious Diseases Center and Faculty of Medicine, Chulalongkorn University                           | Chaniya Jamsaim, Duangtip Singhakun, Ratchada Kitsommart, Sininat Petcharat, Yutthana Joyjinda, Weenassarin Ampoot, Apaporn Rodpan, Thiravat Hemachudha, Supaporn Wacharapluesadee                                                                               |
| EPI_ISL_1117603, EPI_ISL_1117604, EPI_ISL_1117606, EPI_ISL_1117608, EPI_ISL_1117611, EPI_ISL_1117612, EPI_ISL_1117614, EPI_ISL_1117615, EPI_ISL_1117617, EPI_ISL_1117620, EPI_ISL_1117622, EPI_ISL_1117623, EPI_ISL_1117625, EPI_ISL_1117627, EPI_ISL_1117629, EPI_ISL_1117630, EPI_ISL_1117632, EPI_ISL_1117634, EPI_ISL_1117635, EPI_ISL_1117637, EPI_ISL_1117638, EPI_ISL_1117640, EPI_ISL_1117642, EPI_ISL_1117643, EPI_ISL_1117644, EPI_ISL_1117647, EPI_ISL_1117649, EPI_ISL_1117650, EPI_ISL_1117652, EPI_ISL_1117653, EPI_ISL_1117654, EPI_ISL_1117655, EPI_ISL_1117656, EPI_ISL_1117658, EPI_ISL_1117659, EPI_ISL_1117660 | Ministry of Health Turkey                                                                                                                | Ministry of Health Turkey                                                                                                      | Fatma Bayrakdar, Yasemin Cogun, Süleyman Yalcin, Aye Baak Alta, Gülay Korukluolu                                                                                                                                                                                 |
| see above                                                                                                                                                                                                                                                                                                                                                                                                                                                                                                                                                                                                                          | Ministry of Health Turkey                                                                                                                | Ministry of Health Turkey                                                                                                      | Fatma Bayrakdar, Yasemin Cogun, Süleyman Yalcin, Aye Baak Alta, Gülay Korukluolu                                                                                                                                                                                 |
| EPI_ISL_1117700                                                                                                                                                                                                                                                                                                                                                                                                                                                                                                                                                                                                                    | Ohio Department of Health Laboratory                                                                                                     | Ohio Department of Health Laboratory                                                                                           | Holmes, Jennifer; Eric Brandt, Keoni Omura, Glen McGillivray, Caitlin McDonnell, Jade Mowery, Stephanie Mccracken, Tyler Payne, Kirtana Ramadugu, Erica Leasure, Brent Lee, Kelsey Florek, Heather Blankenship, Allison Black, Quanta Brown, and Tammy Bannerman |
| EPI_ISL_1117722, EPI_ISL_1117725, EPI_ISL_1117728, EPI_ISL_1117731, EPI_ISL_1117734, EPI_ISL_1117735, EPI_ISL_1117738, EPI_ISL_1117739, EPI_ISL_1117741, EPI_ISL_1117754, EPI_ISL_1117773                                                                                                                                                                                                                                                                                                                                                                                                                                          | National Virus Reference Laboratory                                                                                                      | National Virus Reference Laboratory                                                                                            | Zoe Yandle, Gabriel Gonzalez, Michael Carr, Jonathan Dean, Cillian F De Gascun                                                                                                                                                                                   |
| see above                                                                                                                                                                                                                                                                                                                                                                                                                                                                                                                                                                                                                          | National Virus Reference Laboratory                                                                                                      | National Virus Reference Laboratory                                                                                            | Zoe Yandle, Gabriel Gonzalez, Michael Carr, Jonathan Dean, Cillian F De Gascun                                                                                                                                                                                   |
| EPI_ISL_1117774                                                                                                                                                                                                                                                                                                                                                                                                                                                                                                                                                                                                                    | Ohio Department of Health Laboratory                                                                                                     | Ohio Department of Health Laboratory                                                                                           | Holmes, Jennifer; Eric Brandt, Keoni Omura, Glen McGillivray, Caitlin McDonnell, Jade Mowery, Stephanie Mccracken, Tyler Payne, Kirtana Ramadugu, Erica Leasure, Brent Lee, Kelsey Florek, Heather Blankenship, Allison Black, Quanta Brown, and Tammy Bannerman |
| EPI_ISL_1117810, EPI_ISL_1117811, EPI_ISL_1117813, EPI_ISL_1117814, EPI_ISL_1117815, EPI_ISL_1117816                                                                                                                                                                                                                                                                                                                                                                                                                                                                                                                               | Institut für Pathologie, Salzkammergut Klinikum Vöcklabruck                                                                              | Bergthaler laboratory, CeMM Research Center for Molecular Medicine of the Austrian Academy of Sciences                         | Lukas Endler, Anna Schedl, Thomas Penz, Benedikt Agerer, Maelle Le Moing, Michael Schuster, Bekir Erguner, Jan Laine, Martin Senekowitsch, Christoph Bock, Andreas Bergthaler                                                                                    |
| EPI_ISL_1117831, EPI_ISL_1117832, EPI_ISL_1117833                                                                                                                                                                                                                                                                                                                                                                                                                                                                                                                                                                                  | HG Pharma GmbH                                                                                                                           | Bergthaler laboratory, CeMM Research Center for Molecular Medicine of the Austrian Academy of Sciences                         | Lukas Endler, Anna Schedl, Thomas Penz, Benedikt Agerer, Maelle Le Moing, Michael Schuster, Bekir Erguner, Jan Laine, Martin Senekowitsch, Christoph Bock, Andreas Bergthaler                                                                                    |
| EPI_ISL_1117834, EPI_ISL_1117835, EPI_ISL_1117840, EPI_ISL_1117841, EPI_ISL_1117842, EPI_ISL_1117843, EPI_ISL_1117844, EPI_ISL_1117845                                                                                                                                                                                                                                                                                                                                                                                                                                                                                             | Klinikum Wels-Grieskirchen                                                                                                               | Bergthaler laboratory, CeMM Research Center for Molecular Medicine of the Austrian Academy of Sciences                         | Lukas Endler, Anna Schedl, Thomas Penz, Benedikt Agerer, Maelle Le Moing, Michael Schuster, Bekir Erguner, Jan Laine, Martin Senekowitsch, Christoph Bock, Andreas Bergthaler                                                                                    |
| EPI_ISL_1117846                                                                                                                                                                                                                                                                                                                                                                                                                                                                                                                                                                                                                    | Institut für Pathologie, Salzkammergut Klinikum Vöcklabruck                                                                              | Bergthaler laboratory, CeMM Research Center for Molecular Medicine of the Austrian Academy of Sciences                         | Lukas Endler, Anna Schedl, Thomas Penz, Benedikt Agerer, Maelle Le Moing, Michael Schuster, Bekir Erguner, Jan Laine, Martin Senekowitsch, Christoph Bock, Andreas Bergthaler                                                                                    |
| EPI_ISL_1117870, EPI_ISL_1117871, EPI_ISL_1117872, EPI_ISL_1117882, EPI_ISL_1117883, EPI_ISL_1117884, EPI_ISL_1117885                                                                                                                                                                                                                                                                                                                                                                                                                                                                                                              | HG Pharma GmbH                                                                                                                           | Bergthaler laboratory, CeMM Research Center for Molecular Medicine of the Austrian Academy of Sciences                         | Lukas Endler, Anna Schedl, Thomas Penz, Benedikt Agerer, Maelle Le Moing, Michael Schuster, Bekir Erguner, Jan Laine, Martin Senekowitsch, Christoph Bock, Andreas Bergthaler                                                                                    |
| EPI_ISL_1117921                                                                                                                                                                                                                                                                                                                                                                                                                                                                                                                                                                                                                    | Klinikum Wels-Grieskirchen                                                                                                               | Bergthaler laboratory, CeMM Research Center for Molecular Medicine of the Austrian Academy of Sciences                         | Lukas Endler, Anna Schedl, Thomas Penz, Benedikt Agerer, Maelle Le Moing, Michael Schuster, Bekir Erguner, Jan Laine, Martin Senekowitsch, Christoph Bock, Andreas Bergthaler                                                                                    |
| EPI_ISL_1117922, EPI_ISL_1117929, EPI_ISL_1117931, EPI_ISL_1117932, EPI_ISL_1117933, EPI_ISL_1117934, EPI_ISL_1117935                                                                                                                                                                                                                                                                                                                                                                                                                                                                                                              | HG Pharma GmbH                                                                                                                           | Bergthaler laboratory, CeMM Research Center for Molecular Medicine of the Austrian Academy of Sciences                         | Lukas Endler, Anna Schedl, Thomas Penz, Benedikt Agerer, Maelle Le Moing, Michael Schuster, Bekir Erguner, Jan Laine, Martin Senekowitsch, Christoph Bock, Andreas Bergthaler                                                                                    |
| EPI_ISL_1118050, EPI_ISL_1118051, EPI_ISL_1118052, EPI_ISL_1118053, EPI_ISL_1118054, EPI_ISL_1118055, EPI_ISL_1118056, EPI_ISL_1118057, EPI_ISL_1118058, EPI_ISL_1118059, EPI_ISL_1118060, EPI_ISL_1118061                                                                                                                                                                                                                                                                                                                                                                                                                         | Klinikum Wels-Grieskirchen                                                                                                               | Bergthaler laboratory, CeMM Research Center for Molecular Medicine of the Austrian Academy of Sciences                         | Lukas Endler, Anna Schedl, Thomas Penz, Benedikt Agerer, Maelle Le Moing, Michael Schuster, Bekir Erguner, Jan Laine, Martin Senekowitsch, Christoph Bock, Andreas Bergthaler                                                                                    |
| see above                                                                                                                                                                                                                                                                                                                                                                                                                                                                                                                                                                                                                          | Klinikum Wels-Grieskirchen                                                                                                               | Bergthaler laboratory, CeMM Research Center for Molecular Medicine of the Austrian Academy of Sciences                         | Lukas Endler, Anna Schedl, Thomas Penz, Benedikt Agerer, Maelle Le Moing, Michael Schuster, Bekir Erguner, Jan Laine, Martin Senekowitsch, Christoph Bock, Andreas Bergthaler                                                                                    |
| EPI_ISL_1118062                                                                                                                                                                                                                                                                                                                                                                                                                                                                                                                                                                                                                    | Institut für Pathologie, Salzkammergut Klinikum Vöcklabruck                                                                              | Bergthaler laboratory, CeMM Research Center for Molecular Medicine of the Austrian Academy of Sciences                         | Lukas Endler, Anna Schedl, Thomas Penz, Benedikt Agerer, Maelle Le Moing, Michael Schuster, Bekir Erguner, Jan Laine, Martin Senekowitsch, Christoph Bock, Andreas Bergthaler                                                                                    |
| EPI_ISL_1118063                                                                                                                                                                                                                                                                                                                                                                                                                                                                                                                                                                                                                    | Klinikum Wels-Grieskirchen                                                                                                               | Bergthaler laboratory, CeMM Research Center for Molecular Medicine of the Austrian Academy of Sciences                         | Lukas Endler, Anna Schedl, Thomas Penz, Benedikt Agerer, Maelle Le Moing, Michael Schuster, Bekir Erguner, Jan Laine, Martin Senekowitsch, Christoph Bock, Andreas Bergthaler                                                                                    |
| EPI_ISL_1118081, EPI_ISL_1118082                                                                                                                                                                                                                                                                                                                                                                                                                                                                                                                                                                                                   | HG Pharma GmbH                                                                                                                           | Bergthaler laboratory, CeMM Research Center for Molecular Medicine of the Austrian Academy of Sciences                         | Lukas Endler, Anna Schedl, Thomas Penz, Benedikt Agerer, Maelle Le Moing, Michael Schuster, Bekir Erguner, Jan Laine, Martin Senekowitsch, Christoph Bock, Andreas Bergthaler                                                                                    |
| EPI_ISL_1118086, EPI_ISL_1118087, EPI_ISL_1118088, EPI_ISL_1118089                                                                                                                                                                                                                                                                                                                                                                                                                                                                                                                                                                 | Ohio Department of Health Laboratory                                                                                                     | Ohio Department of Health Laboratory                                                                                           | Holmes, Jennifer; Eric Brandt, Keoni Omura, Glen McGillivray, Caitlin McDonnell, Jade Mowery, Stephanie Mccracken, Tyler Payne, Kirtana Ramadugu, Erica Leasure, Brent Lee, Kelsey Florek, Heather Blankenship, Allison Black, Quanta Brown, and Tammy Bannerman |
| EPI_ISL_1118116, EPI_ISL_1118123, EPI_ISL_1118127, EPI_ISL_1118129,                                                                                                                                                                                                                                                                                                                                                                                                                                                                                                                                                                | Dept. of Microbiology and Infection Control, Akershus University Hospital HF                                                             | Dept. of Microbiology and Infection Control, Akershus University Hospital HF                                                   | Hege Vangstein Aamot, Alexander Hesselberg Lovestad                                                                                                                                                                                                              |





|                                                                                                                                                                          |                                                                                          |                                                                                                                                        |                                                                                                                                                                                                                                                                          |
|--------------------------------------------------------------------------------------------------------------------------------------------------------------------------|------------------------------------------------------------------------------------------|----------------------------------------------------------------------------------------------------------------------------------------|--------------------------------------------------------------------------------------------------------------------------------------------------------------------------------------------------------------------------------------------------------------------------|
| EPI_ISL_1118535                                                                                                                                                          | Akershus University Hospital, Department for Microbiology and Infectious Disease Control | Norwegian Institute of Public Health, Department of Virology                                                                           | Kathrine Stene-Johansen, Kamilla Heddeland Instefjord, Hilde Elshaug, Garcia Llorente Ignacio, Engebretsen Serina Beate, Pedersen Benedikte Nevjen, Debech Nadia, Atiya R Ali, Marie Paulsen Madsen, Rasmus Riis Kopperud, Hilde Vollan, Karoline Bragstad, Olav Hungnes |
| EPI_ISL_1118537                                                                                                                                                          | Hospital of Southern Norway - Kristiansand, Department of Medical Microbiology           | Norwegian Institute of Public Health, Department of Virology                                                                           | Kathrine Stene-Johansen, Kamilla Heddeland Instefjord, Hilde Elshaug, Garcia Llorente Ignacio, Engebretsen Serina Beate, Pedersen Benedikte Nevjen, Debech Nadia, Atiya R Ali, Marie Paulsen Madsen, Rasmus Riis Kopperud, Hilde Vollan, Karoline Bragstad, Olav Hungnes |
| EPI_ISL_1118540, EPI_ISL_1118541                                                                                                                                         | Norwegian Institute of Public Health, Department of Virology                             | Norwegian Institute of Public Health, Department of Virology                                                                           | Kathrine Stene-Johansen, Kamilla Heddeland Instefjord, Hilde Elshaug, Garcia Llorente Ignacio, Engebretsen Serina Beate, Pedersen Benedikte Nevjen, Debech Nadia, Atiya R Ali, Marie Paulsen Madsen, Rasmus Riis Kopperud, Hilde Vollan, Karoline Bragstad, Olav Hungnes |
| EPI_ISL_1118542                                                                                                                                                          | Vestfold Hospital, Toensberg Department of Microbiology                                  | Norwegian Institute of Public Health, Department of Virology                                                                           | Kathrine Stene-Johansen, Kamilla Heddeland Instefjord, Hilde Elshaug, Garcia Llorente Ignacio, Engebretsen Serina Beate, Pedersen Benedikte Nevjen, Debech Nadia, Atiya R Ali, Marie Paulsen Madsen, Rasmus Riis Kopperud, Hilde Vollan, Karoline Bragstad, Olav Hungnes |
| EPI_ISL_1118544                                                                                                                                                          | Norwegian Institute of Public Health, Department of Virology                             | Norwegian Institute of Public Health, Department of Virology                                                                           | Kathrine Stene-Johansen, Kamilla Heddeland Instefjord, Hilde Elshaug, Garcia Llorente Ignacio, Engebretsen Serina Beate, Pedersen Benedikte Nevjen, Debech Nadia, Atiya R Ali, Marie Paulsen Madsen, Rasmus Riis Kopperud, Hilde Vollan, Karoline Bragstad, Olav Hungnes |
| EPI_ISL_1118545, EPI_ISL_1118546                                                                                                                                         | Dept. of Medical Microbiology, Stavanger University Hospital, Helse Stavanger HF         | Norwegian Institute of Public Health, Department of Virology                                                                           | Kathrine Stene-Johansen, Kamilla Heddeland Instefjord, Hilde Elshaug, Garcia Llorente Ignacio, Engebretsen Serina Beate, Pedersen Benedikte Nevjen, Debech Nadia, Atiya R Ali, Marie Paulsen Madsen, Rasmus Riis Kopperud, Hilde Vollan, Karoline Bragstad, Olav Hungnes |
| EPI_ISL_1118547                                                                                                                                                          | Akershus University Hospital, Department for Microbiology and Infectious Disease Control | Norwegian Institute of Public Health, Department of Virology                                                                           | Kathrine Stene-Johansen, Kamilla Heddeland Instefjord, Hilde Elshaug, Garcia Llorente Ignacio, Engebretsen Serina Beate, Pedersen Benedikte Nevjen, Debech Nadia, Atiya R Ali, Marie Paulsen Madsen, Rasmus Riis Kopperud, Hilde Vollan, Karoline Bragstad, Olav Hungnes |
| EPI_ISL_1118550                                                                                                                                                          | Nordland Hospital - Bodo, Laboratory Department, Molecular Biology Unit                  | Norwegian Institute of Public Health, Department of Virology                                                                           | Kathrine Stene-Johansen, Kamilla Heddeland Instefjord, Hilde Elshaug, Garcia Llorente Ignacio, Engebretsen Serina Beate, Pedersen Benedikte Nevjen, Debech Nadia, Atiya R Ali, Marie Paulsen Madsen, Rasmus Riis Kopperud, Hilde Vollan, Karoline Bragstad, Olav Hungnes |
| EPI_ISL_1118551                                                                                                                                                          | Oslo University Hospital, Department of Medical Microbiology                             | Norwegian Institute of Public Health, Department of Virology                                                                           | Kathrine Stene-Johansen, Kamilla Heddeland Instefjord, Hilde Elshaug, Garcia Llorente Ignacio, Engebretsen Serina Beate, Pedersen Benedikte Nevjen, Debech Nadia, Atiya R Ali, Marie Paulsen Madsen, Rasmus Riis Kopperud, Hilde Vollan, Karoline Bragstad, Olav Hungnes |
| EPI_ISL_1118552                                                                                                                                                          | Akershus University Hospital, Department for Microbiology and Infectious Disease Control | Norwegian Institute of Public Health, Department of Virology                                                                           | Kathrine Stene-Johansen, Kamilla Heddeland Instefjord, Hilde Elshaug, Garcia Llorente Ignacio, Engebretsen Serina Beate, Pedersen Benedikte Nevjen, Debech Nadia, Atiya R Ali, Marie Paulsen Madsen, Rasmus Riis Kopperud, Hilde Vollan, Karoline Bragstad, Olav Hungnes |
| EPI_ISL_1118553, EPI_ISL_1118554                                                                                                                                         | Nordland Hospital - Bodo, Laboratory Department, Molecular Biology Unit                  | Norwegian Institute of Public Health, Department of Virology                                                                           | Kathrine Stene-Johansen, Kamilla Heddeland Instefjord, Hilde Elshaug, Garcia Llorente Ignacio, Engebretsen Serina Beate, Pedersen Benedikte Nevjen, Debech Nadia, Atiya R Ali, Marie Paulsen Madsen, Rasmus Riis Kopperud, Hilde Vollan, Karoline Bragstad, Olav Hungnes |
| EPI_ISL_1118555                                                                                                                                                          | Norwegian Institute of Public Health, Department of Virology                             | Norwegian Institute of Public Health, Department of Virology                                                                           | Kathrine Stene-Johansen, Kamilla Heddeland Instefjord, Hilde Elshaug, Garcia Llorente Ignacio, Engebretsen Serina Beate, Pedersen Benedikte Nevjen, Debech Nadia, Atiya R Ali, Marie Paulsen Madsen, Rasmus Riis Kopperud, Hilde Vollan, Karoline Bragstad, Olav Hungnes |
| EPI_ISL_1118558, EPI_ISL_1118559                                                                                                                                         | Dept. of Medical Microbiology, Stavanger University Hospital, Helse Stavanger HF         | Norwegian Institute of Public Health, Department of Virology                                                                           | Kathrine Stene-Johansen, Kamilla Heddeland Instefjord, Hilde Elshaug, Garcia Llorente Ignacio, Engebretsen Serina Beate, Pedersen Benedikte Nevjen, Debech Nadia, Atiya R Ali, Marie Paulsen Madsen, Rasmus Riis Kopperud, Hilde Vollan, Karoline Bragstad, Olav Hungnes |
| EPI_ISL_1118561                                                                                                                                                          | Akershus University Hospital, Department for Microbiology and Infectious Disease Control | Norwegian Institute of Public Health, Department of Virology                                                                           | Kathrine Stene-Johansen, Kamilla Heddeland Instefjord, Hilde Elshaug, Garcia Llorente Ignacio, Engebretsen Serina Beate, Pedersen Benedikte Nevjen, Debech Nadia, Atiya R Ali, Marie Paulsen Madsen, Rasmus Riis Kopperud, Hilde Vollan, Karoline Bragstad, Olav Hungnes |
| EPI_ISL_1118562                                                                                                                                                          | Furst Medical Laboratory                                                                 | Norwegian Institute of Public Health, Department of Virology                                                                           | Kathrine Stene-Johansen, Kamilla Heddeland Instefjord, Hilde Elshaug, Garcia Llorente Ignacio, Engebretsen Serina Beate, Pedersen Benedikte Nevjen, Debech Nadia, Atiya R Ali, Marie Paulsen Madsen, Rasmus Riis Kopperud, Hilde Vollan, Karoline Bragstad, Olav Hungnes |
| EPI_ISL_1118563                                                                                                                                                          | Akershus University Hospital, Department for Microbiology and Infectious Disease Control | Norwegian Institute of Public Health, Department of Virology                                                                           | Kathrine Stene-Johansen, Kamilla Heddeland Instefjord, Hilde Elshaug, Garcia Llorente Ignacio, Engebretsen Serina Beate, Pedersen Benedikte Nevjen, Debech Nadia, Atiya R Ali, Marie Paulsen Madsen, Rasmus Riis Kopperud, Hilde Vollan, Karoline Bragstad, Olav Hungnes |
| EPI_ISL_1118564                                                                                                                                                          | Dept. of Medical Microbiology, Stavanger University Hospital, Helse Stavanger HF         | Norwegian Institute of Public Health, Department of Virology                                                                           | Kathrine Stene-Johansen, Kamilla Heddeland Instefjord, Hilde Elshaug, Garcia Llorente Ignacio, Engebretsen Serina Beate, Pedersen Benedikte Nevjen, Debech Nadia, Atiya R Ali, Marie Paulsen Madsen, Rasmus Riis Kopperud, Hilde Vollan, Karoline Bragstad, Olav Hungnes |
| EPI_ISL_1118566, EPI_ISL_1118567                                                                                                                                         | Akershus University Hospital, Department for Microbiology and Infectious Disease Control | Norwegian Institute of Public Health, Department of Virology                                                                           | Kathrine Stene-Johansen, Kamilla Heddeland Instefjord, Hilde Elshaug, Garcia Llorente Ignacio, Engebretsen Serina Beate, Pedersen Benedikte Nevjen, Debech Nadia, Atiya R Ali, Marie Paulsen Madsen, Rasmus Riis Kopperud, Hilde Vollan, Karoline Bragstad, Olav Hungnes |
| EPI_ISL_1118570, EPI_ISL_1118571                                                                                                                                         | Dept. of Medical Microbiology, Stavanger University Hospital, Helse Stavanger HF         | Norwegian Institute of Public Health, Department of Virology                                                                           | Kathrine Stene-Johansen, Kamilla Heddeland Instefjord, Hilde Elshaug, Garcia Llorente Ignacio, Engebretsen Serina Beate, Pedersen Benedikte Nevjen, Debech Nadia, Atiya R Ali, Marie Paulsen Madsen, Rasmus Riis Kopperud, Hilde Vollan, Karoline Bragstad, Olav Hungnes |
| EPI_ISL_1118583                                                                                                                                                          | Innlandet Hospital Trust, Division Lillehammer, Department for Medical Microbiology      | Norwegian Institute of Public Health, Department of Virology                                                                           | Kathrine Stene-Johansen, Kamilla Heddeland Instefjord, Hilde Elshaug, Garcia Llorente Ignacio, Engebretsen Serina Beate, Pedersen Benedikte Nevjen, Debech Nadia, Atiya R Ali, Marie Paulsen Madsen, Rasmus Riis Kopperud, Hilde Vollan, Karoline Bragstad, Olav Hungnes |
| EPI_ISL_1118584                                                                                                                                                          | Akershus University Hospital, Department for Microbiology and Infectious Disease Control | Norwegian Institute of Public Health, Department of Virology                                                                           | Kathrine Stene-Johansen, Kamilla Heddeland Instefjord, Hilde Elshaug, Garcia Llorente Ignacio, Engebretsen Serina Beate, Pedersen Benedikte Nevjen, Debech Nadia, Atiya R Ali, Marie Paulsen Madsen, Rasmus Riis Kopperud, Hilde Vollan, Karoline Bragstad, Olav Hungnes |
| EPI_ISL_1118802, EPI_ISL_1118910, EPI_ISL_1118911, EPI_ISL_1118912, EPI_ISL_1118913, EPI_ISL_1118914, EPI_ISL_1118920, EPI_ISL_1118921, EPI_ISL_1118922, EPI_ISL_1118924 | Ohio Department of Health Laboratory                                                     | Ohio Department of Health Laboratory                                                                                                   | Holmes, Jennifer; Eric Brandt, Keoni Omura, Glen McGillivray, Caitlin McDonnell, Jade Mowery, Stephanie Mccracken, Tyler Payne, Kirtana Ramadugu, Erica Leasure, Brent Lee, Kelsey Florek, Heather Blankenship, Allison Black, Quanta Brown, and Tammy Bannerman         |
| EPI_ISL_1120110                                                                                                                                                          | Kansas Health and Environmental Lab                                                      | Kansas Health and Environmental Lab                                                                                                    | Mike Grose, Jonathan Barnell, Ben Olsen, and Phil Adam                                                                                                                                                                                                                   |
| EPI_ISL_1120491, EPI_ISL_1120562, EPI_ISL_1120575, EPI_ISL_1120578                                                                                                       | Dutch COVID-19 response team                                                             | Medical Microbiology, Maastricht University Medical Centre                                                                             | Jozef Dingemans*, Brian van der Veer*, Erik Beuken, Carmen Reumkens, Lieke van Alphen, Christian Hoebe, Paul Savelkoul                                                                                                                                                   |
| EPI_ISL_1120708                                                                                                                                                          | Inno Diagnostics/Center for Research Resources, Ponce Medical School Foundation, Inc.    | Centers for Disease Control and Prevention, Dengue Branch                                                                              | Gilberto A. Santiago, Glenda Gonzalez, Betzabel Flores, Keyla Charriez, Andrea Arias-Garcia, Raphael Sanchez-Torres, Vanessa Rivera-Amill, Gabriela Paz-Bailey, Jorge L. Munoz-Jordan                                                                                    |
| EPI_ISL_1120732                                                                                                                                                          | Laboratoire central de Virologie                                                         | Laboratoire de Biotechnologie                                                                                                          | Hakima Kabbaj, Myriam Sefarr, Ghizlane EL Amin, Amal Zouaki, Abdelmunim Essabbar, Tarik Aanniz, Mouna Ouadghiri, Saaid Amzazi, Lahcen Belyamani and Azeddine Ibrahim                                                                                                     |
| EPI_ISL_1120825                                                                                                                                                          | GHOL                                                                                     | Laboratory of genomics and metagenomics, Institute of Microbiology, University Hospital Centre and University of Lausanne, Switzerland | Trestan Pillonel, Damien Jacot, Sébastien Aeby, Gilbert Greub, Claire Bertelli                                                                                                                                                                                           |
| EPI_ISL_1120842                                                                                                                                                          | LA SOURCE                                                                                | Laboratory of genomics and metagenomics, Institute of Microbiology, University Hospital Centre and University of Lausanne, Switzerland | Trestan Pillonel, Damien Jacot, Sébastien Aeby, Gilbert Greub, Claire Bertelli                                                                                                                                                                                           |
| EPI_ISL_1120844                                                                                                                                                          | UNILABS - COPPET                                                                         | Laboratory of genomics and metagenomics, Institute of Microbiology, University Hospital Centre and University of Lausanne, Switzerland | Trestan Pillonel, Damien Jacot, Sébastien Aeby, Gilbert Greub, Claire Bertelli                                                                                                                                                                                           |
| EPI_ISL_1120850, EPI_ISL_1120851, EPI_ISL_1120852, EPI_ISL_1120853                                                                                                       | LA SOURCE                                                                                | Laboratory of genomics and metagenomics, Institute of Microbiology, University Hospital Centre and University of Lausanne, Switzerland | Trestan Pillonel, Damien Jacot, Sébastien Aeby, Gilbert Greub, Claire Bertelli                                                                                                                                                                                           |
| EPI_ISL_1120858, EPI_ISL_1120868, EPI_ISL_1120869, EPI_ISL_1120871                                                                                                       | EHNV                                                                                     | Laboratory of genomics and metagenomics, Institute of Microbiology, University Hospital Centre and University of Lausanne, Switzerland | Trestan Pillonel, Damien Jacot, Sébastien Aeby, Gilbert Greub, Claire Bertelli                                                                                                                                                                                           |
| EPI_ISL_1120874, EPI_ISL_1120877                                                                                                                                         | CHUV                                                                                     | Laboratory of genomics and metagenomics, Institute of Microbiology, University Hospital Centre and University of Lausanne, Switzerland | Trestan Pillonel, Damien Jacot, Sébastien Aeby, Gilbert Greub, Claire Bertelli                                                                                                                                                                                           |



|                                                                                                                                                                                                                                                                                                                                                                                                                                                                                                                                                                                                                                                                                                                                                                                                                                                                                                                                     |                                                                                                     |                                                                                                                                   |                                                                                                                                                                                                                                                                                                                                                                                                                                                                    |
|-------------------------------------------------------------------------------------------------------------------------------------------------------------------------------------------------------------------------------------------------------------------------------------------------------------------------------------------------------------------------------------------------------------------------------------------------------------------------------------------------------------------------------------------------------------------------------------------------------------------------------------------------------------------------------------------------------------------------------------------------------------------------------------------------------------------------------------------------------------------------------------------------------------------------------------|-----------------------------------------------------------------------------------------------------|-----------------------------------------------------------------------------------------------------------------------------------|--------------------------------------------------------------------------------------------------------------------------------------------------------------------------------------------------------------------------------------------------------------------------------------------------------------------------------------------------------------------------------------------------------------------------------------------------------------------|
| EPI_ISL_1120951, EPI_ISL_1120952, EPI_ISL_1120953, EPI_ISL_1120954, EPI_ISL_1120958, EPI_ISL_1120959, EPI_ISL_1120960, EPI_ISL_1120961                                                                                                                                                                                                                                                                                                                                                                                                                                                                                                                                                                                                                                                                                                                                                                                              | Hospital Universitario 12 de Octubre                                                                | SeqCOVID-SPAIN consortium/IBV(CSIC)                                                                                               | Esther Viedma, Raúl Recio, Irene Muñoz-Gallego, Jennifer Villa, Rafael Delgado, M <sup>o</sup> Dolores Folgueira and SeqCOVID-SPAIN consortiumconsortium                                                                                                                                                                                                                                                                                                           |
| EPI_ISL_1121031                                                                                                                                                                                                                                                                                                                                                                                                                                                                                                                                                                                                                                                                                                                                                                                                                                                                                                                     | Area of Virology, Serology and Virology Division (SAVID), New South Wales Health Pathology Randwick | Virology Research Laboratory; Area of Virology, Serology and Virology Division (SAVID), New South Wales Health Pathology Randwick | Foster, C.; Au, J.; Ruiz Silva, M.; Deveson, I.; Bull, R.; Van Hal, S.; Rawlinson, W.                                                                                                                                                                                                                                                                                                                                                                              |
| EPI_ISL_1121222, EPI_ISL_1121223, EPI_ISL_1121224, EPI_ISL_1121225, EPI_ISL_1121226, EPI_ISL_1121227, EPI_ISL_1121228                                                                                                                                                                                                                                                                                                                                                                                                                                                                                                                                                                                                                                                                                                                                                                                                               | DC Public Health Lab/ Dept. of Forensic Sciences                                                    | DC Public Health Lab/ Dept. of Forensic Sciences                                                                                  | Scott Nguyen, Janis Doss, Elizabeth Zelaya, Connie Maza, Monica Mann, Brittany Hamilton, David Payne, Jocelyn Hauser                                                                                                                                                                                                                                                                                                                                               |
| EPI_ISL_1121325                                                                                                                                                                                                                                                                                                                                                                                                                                                                                                                                                                                                                                                                                                                                                                                                                                                                                                                     | IAL Regional de Santos                                                                              | Instituto Adolfo Lutz, Interdisciplinary Procedures Center, Strategic Laboratory                                                  | Claudio Tavares Sacchi, Claudia Regina Gonçalves, Erica Valesa Ramos Gomes, Karoline Rodrigues Campos, Caio Vinicius Dias Lopes                                                                                                                                                                                                                                                                                                                                    |
| EPI_ISL_1121521, EPI_ISL_1121522, EPI_ISL_1121525, EPI_ISL_1121527, EPI_ISL_1121549, EPI_ISL_1121554                                                                                                                                                                                                                                                                                                                                                                                                                                                                                                                                                                                                                                                                                                                                                                                                                                | New Mexico Department of Health Scientific Laboratory                                               | Center for Global Health, University of New Mexico Health Sciences Center                                                         | Daryl Dommam, Kurt Schwalm, Twila Kunde, Joseph Hicks, Anastacia Griego, Michael Edwards, Darrell Dinwiddie                                                                                                                                                                                                                                                                                                                                                        |
| EPI_ISL_1121634, EPI_ISL_1121635, EPI_ISL_1121637, EPI_ISL_1121638, EPI_ISL_1121639, EPI_ISL_1121640, EPI_ISL_1121641, EPI_ISL_1121642, EPI_ISL_1121643, EPI_ISL_1121644, EPI_ISL_1121645, EPI_ISL_1121646, EPI_ISL_1121647, EPI_ISL_1121649, EPI_ISL_1121650, EPI_ISL_1121651, EPI_ISL_1121652, EPI_ISL_1121655, EPI_ISL_1121656, EPI_ISL_1121657, EPI_ISL_1121659, EPI_ISL_1121660, EPI_ISL_1121663, EPI_ISL_1121664, EPI_ISL_1121665, EPI_ISL_1121666, EPI_ISL_1121667, EPI_ISL_1121668, EPI_ISL_1121669, EPI_ISL_1121670, EPI_ISL_1121671, EPI_ISL_1121672, EPI_ISL_1121673, EPI_ISL_1121674, EPI_ISL_1121675, EPI_ISL_1121676, EPI_ISL_1121677, EPI_ISL_1121678, EPI_ISL_1121679, EPI_ISL_1121680, EPI_ISL_1121681, EPI_ISL_1121682, EPI_ISL_1121683, EPI_ISL_1121684, EPI_ISL_1121685, EPI_ISL_1121686, EPI_ISL_1121687, EPI_ISL_1121688, EPI_ISL_1121692, EPI_ISL_1121694, EPI_ISL_1121696, EPI_ISL_1121697, EPI_ISL_1121698 |                                                                                                     |                                                                                                                                   |                                                                                                                                                                                                                                                                                                                                                                                                                                                                    |
| see above                                                                                                                                                                                                                                                                                                                                                                                                                                                                                                                                                                                                                                                                                                                                                                                                                                                                                                                           | Broad Institute Clinical Research Sequencing Platform                                               | Infectious Disease Program, Broad Institute of Harvard and MIT                                                                    | Lemieux,J.E., Siddle,K.J., Adams,G., Gladden-Young,A., Lagerborg,K., Rudy,M., DeRuff,K., Carter,A., Normandin,E., Bauer,M., Reilly,S., Tomkins-Tinch,C., Loreth,C., Chaluvadi,S., Birren,B.W., Gallagher,G., Smole,S., Park,D.J., MacInnis,B.L., and Sabeti,P.C.                                                                                                                                                                                                   |
| EPI_ISL_1121760, EPI_ISL_1121762, EPI_ISL_1121766, EPI_ISL_1121767, EPI_ISL_1121768, EPI_ISL_1121771, EPI_ISL_1121774, EPI_ISL_1121779, EPI_ISL_1121781, EPI_ISL_1121783                                                                                                                                                                                                                                                                                                                                                                                                                                                                                                                                                                                                                                                                                                                                                            | Massachusetts General Hospital                                                                      | Infectious Disease Program, Broad Institute of Harvard and MIT                                                                    | Lemieux,J.E., Siddle,K.J., Shaw,B., Adams,G., Pierce,V., Turbett,S., Anahtar,M., Branda,J., Slater,D., Harris,J., Lin,A.E., Gladden-Young,A., Lagerborg,K., Rudy,M., DeRuff,K., Carter,A., Normandin,E., Bauer,M., Reilly,S., Tomkins-Tinch,C., Loreth,C., Chaluvadi,S., Neumann,A., Cusick,C., Chapman,S.B., Gnirke,A., Flowers,K., Cerrato,F., Birren,B.W., Gallagher,G., Smole,S., Park,D.J., MacInnis,B.L., Ryan,E., LaRocque,R., Rosenberg,E. and Sabeti,P.C. |
| EPI_ISL_1121854, EPI_ISL_1121859                                                                                                                                                                                                                                                                                                                                                                                                                                                                                                                                                                                                                                                                                                                                                                                                                                                                                                    | Rhode Island Department of Health                                                                   | Infectious Disease Program, Broad Institute of Harvard and MIT                                                                    | Lemieux,J.E., Siddle,K.J., Huard,R., King,E., Azevedo,K., Miller,A., Adams,G., Gladden-Young,A., Lagerborg,K., Rudy,M., DeRuff,K., Carter,A., Normandin,E., Bauer,M., Reilly,S., Tomkins-Tinch,C., Loreth,C., Chaluvadi,S., Birren,B.W., Gallagher,G., Smole,S., Park,D.J., MacInnis,B.L., and Sabeti,P.C.                                                                                                                                                         |
| EPI_ISL_1121963, EPI_ISL_1121964, EPI_ISL_1121965, EPI_ISL_1121966, EPI_ISL_1121967, EPI_ISL_1121968                                                                                                                                                                                                                                                                                                                                                                                                                                                                                                                                                                                                                                                                                                                                                                                                                                | Broad Institute Clinical Research Sequencing Platform                                               | Infectious Disease Program, Broad Institute of Harvard and MIT                                                                    | Lemieux,J.E., Siddle,K.J., Adams,G., Gladden-Young,A., Lagerborg,K., Rudy,M., DeRuff,K., Carter,A., Normandin,E., Bauer,M., Reilly,S., Tomkins-Tinch,C., Loreth,C., Chaluvadi,S., Birren,B.W., Gallagher,G., Smole,S., Park,D.J., MacInnis,B.L., and Sabeti,P.C.                                                                                                                                                                                                   |
| EPI_ISL_1121996, EPI_ISL_1121997, EPI_ISL_1121998, EPI_ISL_1122000, EPI_ISL_1122003, EPI_ISL_1122004                                                                                                                                                                                                                                                                                                                                                                                                                                                                                                                                                                                                                                                                                                                                                                                                                                | Kentucky State Public Health Lab                                                                    | Kentucky State Public Health Lab                                                                                                  | Stephanie Lunn, Karim George, Joshua Tobias, William Grooms, Vaneet Arora, Matthew Johnson, Rachel Zinner, Rhonda Lucas                                                                                                                                                                                                                                                                                                                                            |
| EPI_ISL_1122157, EPI_ISL_1122280, EPI_ISL_1122314                                                                                                                                                                                                                                                                                                                                                                                                                                                                                                                                                                                                                                                                                                                                                                                                                                                                                   | OHSU Lab Services Molecular Microbiology Lab                                                        | Oregon SARS-CoV-2 Genome Sequencing Center                                                                                        | Brendan L. O'Connell, Sally Grindstaff, Kayla Carter, Ruth V. Nichols, Alec J. Hirsch, Donna Hansel, Guang Fan, Xuan, Qin, Daniel N. Streblow, William B. Messer, Andrew C. Adey, Benjamin N. Bimber, Brian J. O'Roak                                                                                                                                                                                                                                              |
| EPI_ISL_1122355, EPI_ISL_1122356                                                                                                                                                                                                                                                                                                                                                                                                                                                                                                                                                                                                                                                                                                                                                                                                                                                                                                    | Ibaraki Prefectural Institute of Public Health                                                      | Ibaraki Prefectural Institute of Public Health                                                                                    | Keiko Goto, Tsuyoshi Sekizuka, Kentaro Itokawa, Rina Tanaka, Masanori Hashino, Makoto Kuroda                                                                                                                                                                                                                                                                                                                                                                       |
| EPI_ISL_1122890                                                                                                                                                                                                                                                                                                                                                                                                                                                                                                                                                                                                                                                                                                                                                                                                                                                                                                                     | Department of Virology I, National Institute of Infectious Diseases                                 | Department of Veterinary Science, National Institute of Infectious Diseases                                                       | Yudai Kuroda, Tsukasa Yamamoto, Keita Ishijima, Souichi Yamada, Shuetsu Fukushima, Ken Maeda                                                                                                                                                                                                                                                                                                                                                                       |
| EPI_ISL_1123374, EPI_ISL_1123375                                                                                                                                                                                                                                                                                                                                                                                                                                                                                                                                                                                                                                                                                                                                                                                                                                                                                                    | IAL Regional de Santos                                                                              | Instituto Adolfo Lutz, Interdisciplinary Procedures Center, Strategic Laboratory                                                  | Claudio Tavares Sacchi, Claudia Regina Gonçalves, Erica Valesa Ramos Gomes, Karoline Rodrigues Campos, Caio Vinicius Dias Lopes                                                                                                                                                                                                                                                                                                                                    |
| EPI_ISL_1123418                                                                                                                                                                                                                                                                                                                                                                                                                                                                                                                                                                                                                                                                                                                                                                                                                                                                                                                     | Pathogen Genomics Center, National Institute of Infectious Diseases                                 | Pathogen Genomics Center, National Institute of Infectious Diseases                                                               | Tsuyoshi Sekizuka, Kentaro Itokawa, Rina Tanaka, Masanori Hashino, Makoto Kuroda                                                                                                                                                                                                                                                                                                                                                                                   |
| EPI_ISL_1123419                                                                                                                                                                                                                                                                                                                                                                                                                                                                                                                                                                                                                                                                                                                                                                                                                                                                                                                     | Tokyo Metropolitan Institute of Public Health                                                       | Pathogen Genomics Center, National Institute of Infectious Diseases                                                               | Tsuyoshi Sekizuka, Kentaro Itokawa, Rina Tanaka, Masanori Hashino, Makoto Kuroda                                                                                                                                                                                                                                                                                                                                                                                   |
| EPI_ISL_1123420, EPI_ISL_1123421, EPI_ISL_1123422, EPI_ISL_1123423                                                                                                                                                                                                                                                                                                                                                                                                                                                                                                                                                                                                                                                                                                                                                                                                                                                                  | SARS-CoV-2 testing team, National Institute of Infectious Diseases                                  | Pathogen Genomics Center, National Institute of Infectious Diseases                                                               | Tsuyoshi Sekizuka, Kentaro Itokawa, Rina Tanaka, Masanori Hashino, Tadashi Kikuchi, Saori Matsuoka, Shigeru Kusagawa, Makoto Kuroda                                                                                                                                                                                                                                                                                                                                |
| EPI_ISL_1123424, EPI_ISL_1123425, EPI_ISL_1123426                                                                                                                                                                                                                                                                                                                                                                                                                                                                                                                                                                                                                                                                                                                                                                                                                                                                                   | SARS-CoV-2 testing team, National Institute of Infectious Diseases                                  | Pathogen Genomics Center, National Institute of Infectious Diseases                                                               | Tsuyoshi Sekizuka, Kentaro Itokawa, Rina Tanaka, Masanori Hashino, Yoshihiro Kaku, Yasutaka Hoshino, Chikako Shimokawa, Eunsil Park, Tsuguto Fujimoto, Makoto Kuroda                                                                                                                                                                                                                                                                                               |
| EPI_ISL_1123427, EPI_ISL_1123428, EPI_ISL_1123429, EPI_ISL_1123430, EPI_ISL_1123431, EPI_ISL_1123434                                                                                                                                                                                                                                                                                                                                                                                                                                                                                                                                                                                                                                                                                                                                                                                                                                | Pathogen Genomics Center, National Institute of Infectious Diseases                                 | Pathogen Genomics Center, National Institute of Infectious Diseases                                                               | Tsuyoshi Sekizuka, Kentaro Itokawa, Rina Tanaka, Masanori Hashino, Makoto Kuroda                                                                                                                                                                                                                                                                                                                                                                                   |
| EPI_ISL_1123448                                                                                                                                                                                                                                                                                                                                                                                                                                                                                                                                                                                                                                                                                                                                                                                                                                                                                                                     | SARS-CoV-2 testing team, National Institute of Infectious Diseases                                  | Pathogen Genomics Center, National Institute of Infectious Diseases                                                               | Tsuyoshi Sekizuka, Kentaro Itokawa, Rina Tanaka, Masanori Hashino, Yoshihiro Kaku, Yasutaka Hoshino, Chikako Shimokawa, Eunsil Park, Tsuguto Fujimoto, Makoto Kuroda                                                                                                                                                                                                                                                                                               |
| EPI_ISL_1123449                                                                                                                                                                                                                                                                                                                                                                                                                                                                                                                                                                                                                                                                                                                                                                                                                                                                                                                     | Pathogen Genomics Center, National Institute of Infectious Diseases                                 | Pathogen Genomics Center, National Institute of Infectious Diseases                                                               | Tsuyoshi Sekizuka, Kentaro Itokawa, Rina Tanaka, Masanori Hashino, Makoto Kuroda                                                                                                                                                                                                                                                                                                                                                                                   |
| EPI_ISL_1123451, EPI_ISL_1123452                                                                                                                                                                                                                                                                                                                                                                                                                                                                                                                                                                                                                                                                                                                                                                                                                                                                                                    | Gunma Prefectural Institute of Public Health and Environmental Sciences                             | Pathogen Genomics Center, National Institute of Infectious Diseases                                                               | Tsuyoshi Sekizuka, Kentaro Itokawa, Rina Tanaka, Masanori Hashino, Makoto Kuroda                                                                                                                                                                                                                                                                                                                                                                                   |
| EPI_ISL_1123453, EPI_ISL_1123454, EPI_ISL_1123455, EPI_ISL_1123456, EPI_ISL_1123457                                                                                                                                                                                                                                                                                                                                                                                                                                                                                                                                                                                                                                                                                                                                                                                                                                                 | Pathogen Genomics Center, National Institute of Infectious Diseases                                 | Pathogen Genomics Center, National Institute of Infectious Diseases                                                               | Tsuyoshi Sekizuka, Kentaro Itokawa, Rina Tanaka, Masanori Hashino, Makoto Kuroda                                                                                                                                                                                                                                                                                                                                                                                   |
| EPI_ISL_1123458                                                                                                                                                                                                                                                                                                                                                                                                                                                                                                                                                                                                                                                                                                                                                                                                                                                                                                                     | SARS-CoV-2 testing team, National Institute of Infectious Diseases                                  | Pathogen Genomics Center, National Institute of Infectious Diseases                                                               | Tsuyoshi Sekizuka, Kentaro Itokawa, Rina Tanaka, Masanori Hashino, Yoshihiro Kaku, Yasutaka Hoshino, Chikako Shimokawa, Eunsil Park, Tsuguto Fujimoto, Makoto Kuroda                                                                                                                                                                                                                                                                                               |
| EPI_ISL_1123461, EPI_ISL_1123462, EPI_ISL_1123463, EPI_ISL_1123464                                                                                                                                                                                                                                                                                                                                                                                                                                                                                                                                                                                                                                                                                                                                                                                                                                                                  | Pathogen Genomics Center, National Institute of Infectious Diseases                                 | Pathogen Genomics Center, National Institute of Infectious Diseases                                                               | Tsuyoshi Sekizuka, Kentaro Itokawa, Rina Tanaka, Masanori Hashino, Makoto Kuroda                                                                                                                                                                                                                                                                                                                                                                                   |
| EPI_ISL_1123467                                                                                                                                                                                                                                                                                                                                                                                                                                                                                                                                                                                                                                                                                                                                                                                                                                                                                                                     | Gunma Prefectural Institute of Public Health and Environmental Sciences                             | Pathogen Genomics Center, National Institute of Infectious Diseases                                                               | Tsuyoshi Sekizuka, Kentaro Itokawa, Rina Tanaka, Masanori Hashino, Makoto Kuroda                                                                                                                                                                                                                                                                                                                                                                                   |
| EPI_ISL_1123468                                                                                                                                                                                                                                                                                                                                                                                                                                                                                                                                                                                                                                                                                                                                                                                                                                                                                                                     | SARS-CoV-2 testing team, National Institute of Infectious Diseases                                  | Pathogen Genomics Center, National Institute of Infectious Diseases                                                               | Tsuyoshi Sekizuka, Kentaro Itokawa, Rina Tanaka, Masanori Hashino, Shigeru Tajima, Takahiro Maeki, Eri Nakayama , Motohiko Ogawa , Chang-Kweng Lim, Makoto Kuroda                                                                                                                                                                                                                                                                                                  |
| EPI_ISL_1123469, EPI_ISL_1123470, EPI_ISL_1123471                                                                                                                                                                                                                                                                                                                                                                                                                                                                                                                                                                                                                                                                                                                                                                                                                                                                                   | SARS-CoV-2 testing team, National Institute of Infectious Diseases                                  | Pathogen Genomics Center, National Institute of Infectious Diseases                                                               | Tsuyoshi Sekizuka, Kentaro Itokawa, Rina Tanaka, Masanori Hashino, Yoshihiro Kaku, Yasutaka Hoshino, Chikako Shimokawa, Eunsil Park, Tsuguto Fujimoto, Makoto Kuroda                                                                                                                                                                                                                                                                                               |





|                                                                                                                                                                                                                                                                                                                                                                                                                                                                                                                                                                                                                                                                                                                                                                                                                                                                                                                                                                                                                                                                                                                                                                                                                                                                                                                                                                                                                                                                                                                                                                                                                                                                                                                                                                                                                                                                                                                                                                                                                                                                                                                                                                                            |                                                                     |                                                                                  |                                                                                                                                                                                                                                                                                                                                                                                                                                                                         |
|--------------------------------------------------------------------------------------------------------------------------------------------------------------------------------------------------------------------------------------------------------------------------------------------------------------------------------------------------------------------------------------------------------------------------------------------------------------------------------------------------------------------------------------------------------------------------------------------------------------------------------------------------------------------------------------------------------------------------------------------------------------------------------------------------------------------------------------------------------------------------------------------------------------------------------------------------------------------------------------------------------------------------------------------------------------------------------------------------------------------------------------------------------------------------------------------------------------------------------------------------------------------------------------------------------------------------------------------------------------------------------------------------------------------------------------------------------------------------------------------------------------------------------------------------------------------------------------------------------------------------------------------------------------------------------------------------------------------------------------------------------------------------------------------------------------------------------------------------------------------------------------------------------------------------------------------------------------------------------------------------------------------------------------------------------------------------------------------------------------------------------------------------------------------------------------------|---------------------------------------------------------------------|----------------------------------------------------------------------------------|-------------------------------------------------------------------------------------------------------------------------------------------------------------------------------------------------------------------------------------------------------------------------------------------------------------------------------------------------------------------------------------------------------------------------------------------------------------------------|
| EPI_ISL_1128196, EPI_ISL_1128197                                                                                                                                                                                                                                                                                                                                                                                                                                                                                                                                                                                                                                                                                                                                                                                                                                                                                                                                                                                                                                                                                                                                                                                                                                                                                                                                                                                                                                                                                                                                                                                                                                                                                                                                                                                                                                                                                                                                                                                                                                                                                                                                                           | SARS-CoV-2 testing team, National Institute of Infectious Diseases  | Pathogen Genomics Center, National Institute of Infectious Diseases              | Tsuyoshi Sekizuka, Kentaro Itokawa, Rina Tanaka, Masanori Hashino, Hidemasa Izumiya, Hideyuki Takahashi, Masatomo Morita, Nobuo Koizumi, Makoto Kuroda                                                                                                                                                                                                                                                                                                                  |
| EPI_ISL_1128229, EPI_ISL_1128230, EPI_ISL_1128231, EPI_ISL_1128232, EPI_ISL_1128233, EPI_ISL_1128234, EPI_ISL_1128235, EPI_ISL_1128236, EPI_ISL_1128272                                                                                                                                                                                                                                                                                                                                                                                                                                                                                                                                                                                                                                                                                                                                                                                                                                                                                                                                                                                                                                                                                                                                                                                                                                                                                                                                                                                                                                                                                                                                                                                                                                                                                                                                                                                                                                                                                                                                                                                                                                    | Department of Infectious Diseases, Kobe Institute of Health         | Pathogen Genomics Center, National Institute of Infectious Diseases              | Tsuyoshi Sekizuka, Kentaro Itokawa, Rina Tanaka, Masanori Hashino, Makoto Kuroda                                                                                                                                                                                                                                                                                                                                                                                        |
| EPI_ISL_1128451                                                                                                                                                                                                                                                                                                                                                                                                                                                                                                                                                                                                                                                                                                                                                                                                                                                                                                                                                                                                                                                                                                                                                                                                                                                                                                                                                                                                                                                                                                                                                                                                                                                                                                                                                                                                                                                                                                                                                                                                                                                                                                                                                                            | SARS-CoV-2 testing team, National Institute of Infectious Diseases  | Pathogen Genomics Center, National Institute of Infectious Diseases              | Tsuyoshi Sekizuka, Kentaro Itokawa, Rina Tanaka, Masanori Hashino, Chang-Kweng Lim, Takahiro Maeki, Motohiko Ogawa, Eri Nakayama, Shigeru Tanjima, Makoto Kuroda                                                                                                                                                                                                                                                                                                        |
| EPI_ISL_1128454, EPI_ISL_1128490, EPI_ISL_1128491, EPI_ISL_1128493, EPI_ISL_1128494, EPI_ISL_1128495, EPI_ISL_1128496, EPI_ISL_1128497, EPI_ISL_1128498, EPI_ISL_1128499, EPI_ISL_1128500, EPI_ISL_1128501, EPI_ISL_1128502, EPI_ISL_1128503, EPI_ISL_1128504, EPI_ISL_1128505, EPI_ISL_1128506, EPI_ISL_1128507, EPI_ISL_1128508, EPI_ISL_1128509, EPI_ISL_1128510, EPI_ISL_1128511, EPI_ISL_1128512, EPI_ISL_1128513, EPI_ISL_1128514, EPI_ISL_1128515, EPI_ISL_1128516, EPI_ISL_1128517, EPI_ISL_1128518, EPI_ISL_1128519, EPI_ISL_1128520, EPI_ISL_1128521, EPI_ISL_1128522, EPI_ISL_1128523, EPI_ISL_1128524, EPI_ISL_1128525, EPI_ISL_1128526, EPI_ISL_1128527, EPI_ISL_1128578, EPI_ISL_1128579, EPI_ISL_1128580, EPI_ISL_1128581, EPI_ISL_1128582, EPI_ISL_1128583, EPI_ISL_1128584, EPI_ISL_1128585, EPI_ISL_1128586, EPI_ISL_1128587, EPI_ISL_1128588, EPI_ISL_1128589, EPI_ISL_1128590, EPI_ISL_1128591, EPI_ISL_1128592, EPI_ISL_1128593, EPI_ISL_1128594, EPI_ISL_1128595, EPI_ISL_1128596, EPI_ISL_1128597, EPI_ISL_1128598, EPI_ISL_1128638, EPI_ISL_1128639, EPI_ISL_1128644, EPI_ISL_1128645, EPI_ISL_1128646, EPI_ISL_1128647, EPI_ISL_1128648, EPI_ISL_1128649, EPI_ISL_1128650, EPI_ISL_1128651, EPI_ISL_1128652, EPI_ISL_1128653, EPI_ISL_1128654, EPI_ISL_1128655, EPI_ISL_1128656, EPI_ISL_1128657, EPI_ISL_1128658, EPI_ISL_1128659, EPI_ISL_1128667, EPI_ISL_1128671, EPI_ISL_1128672, EPI_ISL_1128673, EPI_ISL_1128674, EPI_ISL_1128675, EPI_ISL_1128676, EPI_ISL_1128677, EPI_ISL_1128678, EPI_ISL_1128679, EPI_ISL_1128680, EPI_ISL_1128681, EPI_ISL_1128682, EPI_ISL_1128683, EPI_ISL_1128684, EPI_ISL_1128685, EPI_ISL_1128686, EPI_ISL_1128687, EPI_ISL_1128688, EPI_ISL_1128689, EPI_ISL_1128690, EPI_ISL_1128691, EPI_ISL_1128692, EPI_ISL_1128693, EPI_ISL_1128694, EPI_ISL_1128695, EPI_ISL_1128696, EPI_ISL_1128697, EPI_ISL_1128698, EPI_ISL_1128743, EPI_ISL_1128744, EPI_ISL_1128745, EPI_ISL_1128746, EPI_ISL_1128747, EPI_ISL_1128748, EPI_ISL_1128749, EPI_ISL_1128750, EPI_ISL_1128751, EPI_ISL_1128752, EPI_ISL_1128753, EPI_ISL_1128754, EPI_ISL_1128755, EPI_ISL_1128756, EPI_ISL_1128757, EPI_ISL_1128758, EPI_ISL_1128759, EPI_ISL_1128760 | Pathogen Genomics Center, National Institute of Infectious Diseases | Tsuyoshi Sekizuka, Kentaro Itokawa, Rina Tanaka, Masanori Hashino, Makoto Kuroda |                                                                                                                                                                                                                                                                                                                                                                                                                                                                         |
| see above                                                                                                                                                                                                                                                                                                                                                                                                                                                                                                                                                                                                                                                                                                                                                                                                                                                                                                                                                                                                                                                                                                                                                                                                                                                                                                                                                                                                                                                                                                                                                                                                                                                                                                                                                                                                                                                                                                                                                                                                                                                                                                                                                                                  | Pathogen Genomics Center, National Institute of Infectious Diseases | Pathogen Genomics Center, National Institute of Infectious Diseases              | Tsuyoshi Sekizuka, Kentaro Itokawa, Rina Tanaka, Masanori Hashino, Makoto Kuroda                                                                                                                                                                                                                                                                                                                                                                                        |
| EPI_ISL_1128777, EPI_ISL_1128778, EPI_ISL_1128780, EPI_ISL_1128781, EPI_ISL_1128783, EPI_ISL_1128785                                                                                                                                                                                                                                                                                                                                                                                                                                                                                                                                                                                                                                                                                                                                                                                                                                                                                                                                                                                                                                                                                                                                                                                                                                                                                                                                                                                                                                                                                                                                                                                                                                                                                                                                                                                                                                                                                                                                                                                                                                                                                       | Osaka Institute of Public Health, Morinomiya Center                 | Pathogen Genomics Center, National Institute of Infectious Diseases              | Tsuyoshi Sekizuka, Kentaro Itokawa, Rina Tanaka, Masanori Hashino, Makoto Kuroda                                                                                                                                                                                                                                                                                                                                                                                        |
| EPI_ISL_1128827, EPI_ISL_1128828, EPI_ISL_1128830, EPI_ISL_1128832, EPI_ISL_1128834, EPI_ISL_1128836, EPI_ISL_1128838, EPI_ISL_1128840, EPI_ISL_1128841, EPI_ISL_1128843, EPI_ISL_1128845, EPI_ISL_1128947, EPI_ISL_1128948, EPI_ISL_1128949, EPI_ISL_1128950, EPI_ISL_1128961, EPI_ISL_1128962, EPI_ISL_1128963, EPI_ISL_1129033, EPI_ISL_1129070                                                                                                                                                                                                                                                                                                                                                                                                                                                                                                                                                                                                                                                                                                                                                                                                                                                                                                                                                                                                                                                                                                                                                                                                                                                                                                                                                                                                                                                                                                                                                                                                                                                                                                                                                                                                                                         | Pathogen Genomics Center, National Institute of Infectious Diseases | Pathogen Genomics Center, National Institute of Infectious Diseases              | Tsuyoshi Sekizuka, Kentaro Itokawa, Rina Tanaka, Masanori Hashino, Makoto Kuroda                                                                                                                                                                                                                                                                                                                                                                                        |
| see above                                                                                                                                                                                                                                                                                                                                                                                                                                                                                                                                                                                                                                                                                                                                                                                                                                                                                                                                                                                                                                                                                                                                                                                                                                                                                                                                                                                                                                                                                                                                                                                                                                                                                                                                                                                                                                                                                                                                                                                                                                                                                                                                                                                  | Pathogen Genomics Center, National Institute of Infectious Diseases | Pathogen Genomics Center, National Institute of Infectious Diseases              | Tsuyoshi Sekizuka, Kentaro Itokawa, Rina Tanaka, Masanori Hashino, Makoto Kuroda                                                                                                                                                                                                                                                                                                                                                                                        |
| EPI_ISL_1129130, EPI_ISL_1129131, EPI_ISL_1129132, EPI_ISL_1129133, EPI_ISL_1129134, EPI_ISL_1129135, EPI_ISL_1129136, EPI_ISL_1129137, EPI_ISL_1129138, EPI_ISL_1129139, EPI_ISL_1129140, EPI_ISL_1129141, EPI_ISL_1129142, EPI_ISL_1129143, EPI_ISL_1129144, EPI_ISL_1129145, EPI_ISL_1129146, EPI_ISL_1129147, EPI_ISL_1129148, EPI_ISL_1129149, EPI_ISL_1129150                                                                                                                                                                                                                                                                                                                                                                                                                                                                                                                                                                                                                                                                                                                                                                                                                                                                                                                                                                                                                                                                                                                                                                                                                                                                                                                                                                                                                                                                                                                                                                                                                                                                                                                                                                                                                        | SARS-CoV-2 testing team, National Institute of Infectious Diseases  | Pathogen Genomics Center, National Institute of Infectious Diseases              | Tsuyoshi Sekizuka, Kentaro Itokawa, Rina Tanaka, Masanori Hashino, Yoshihiro Kaku, Yasutaka Hoshino, Chikako Shimokawa, Kyoko Saito, Tsuguto Fujimoto, Makoto Kuroda                                                                                                                                                                                                                                                                                                    |
| see above                                                                                                                                                                                                                                                                                                                                                                                                                                                                                                                                                                                                                                                                                                                                                                                                                                                                                                                                                                                                                                                                                                                                                                                                                                                                                                                                                                                                                                                                                                                                                                                                                                                                                                                                                                                                                                                                                                                                                                                                                                                                                                                                                                                  | SARS-CoV-2 testing team, National Institute of Infectious Diseases  | Pathogen Genomics Center, National Institute of Infectious Diseases              | Tsuyoshi Sekizuka, Kentaro Itokawa, Rina Tanaka, Masanori Hashino, Yoshihiro Kaku, Yasutaka Hoshino, Chikako Shimokawa, Kyoko Saito, Tsuguto Fujimoto, Makoto Kuroda                                                                                                                                                                                                                                                                                                    |
| EPI_ISL_1129288                                                                                                                                                                                                                                                                                                                                                                                                                                                                                                                                                                                                                                                                                                                                                                                                                                                                                                                                                                                                                                                                                                                                                                                                                                                                                                                                                                                                                                                                                                                                                                                                                                                                                                                                                                                                                                                                                                                                                                                                                                                                                                                                                                            | Viollier AG                                                         | Department of Biosystems Science and Engineering, ETH Zürich                     | Chaoran Chen, Sarah Nadeau, Catharine Aquino, Ivan Topolsky, Philipp Jablonski, Lara Fuhrmann, David Dreifuss, Katharina Jahn, Andrea Cabral de Gouvea, Maria Domenica Moccia, Simon Grüter, Timothy Sykes, Lennart Opitz, Griffin White, Laura Neff, Doris Popovic, Andrea Patrignani, Jay Tracy, Ralph Schlapbach, Christiane Beckmann, Maurice Redondo, Olivier Kobel, Christoph Noppen, Sophie Seidel, Noemie Santamaria de Souza, Niko Beerenwinkel, Tanja Stadler |
| EPI_ISL_1129296                                                                                                                                                                                                                                                                                                                                                                                                                                                                                                                                                                                                                                                                                                                                                                                                                                                                                                                                                                                                                                                                                                                                                                                                                                                                                                                                                                                                                                                                                                                                                                                                                                                                                                                                                                                                                                                                                                                                                                                                                                                                                                                                                                            | Viollier AG                                                         | Department of Biosystems Science and Engineering, ETH Zürich                     | Christian Beisel, Sarah Nadeau, Chaoran Chen, Ivan Topolsky, Philipp Jablonski, Lara Fuhrmann, David Dreifuss, Katharina Jahn, Rebecca Denes, Mirjam Feldkamp, Ina Nissen, Natascha Santacroce, Elodie Burcklen, Christiane Beckmann, Maurice Redondo, Olivier Kobel, Christoph Noppen, Sophie Seidel, Noemie Santamaria de Souza, Niko Beerenwinkel, Tanja Stadler                                                                                                     |
| EPI_ISL_1129303                                                                                                                                                                                                                                                                                                                                                                                                                                                                                                                                                                                                                                                                                                                                                                                                                                                                                                                                                                                                                                                                                                                                                                                                                                                                                                                                                                                                                                                                                                                                                                                                                                                                                                                                                                                                                                                                                                                                                                                                                                                                                                                                                                            | Viollier AG                                                         | Department of Biosystems Science and Engineering, ETH Zürich                     | Chaoran Chen, Sarah Nadeau, Ivan Topolsky, Emmanouil Dermitzakis, Keith Harshman, Ioannis Xenarios, Henri Pegeot, Lorenzo Cerutti, Deborah Penet, Philipp Jablonski, Lara Fuhrmann, David Dreifuss, Katharina Jahn, Christiane Beckmann, Maurice Redondo, Olivier Kobel, Christoph Noppen, Sophie Seidel, Noemie Santamaria de Souza, Niko Beerenwinkel, Tanja Stadler                                                                                                  |
| EPI_ISL_1129306, EPI_ISL_1129314                                                                                                                                                                                                                                                                                                                                                                                                                                                                                                                                                                                                                                                                                                                                                                                                                                                                                                                                                                                                                                                                                                                                                                                                                                                                                                                                                                                                                                                                                                                                                                                                                                                                                                                                                                                                                                                                                                                                                                                                                                                                                                                                                           | Viollier AG                                                         | Department of Biosystems Science and Engineering, ETH Zürich                     | Christian Beisel, Sarah Nadeau, Chaoran Chen, Ivan Topolsky, Philipp Jablonski, Lara Fuhrmann, David Dreifuss, Katharina Jahn, Rebecca Denes, Mirjam Feldkamp, Ina Nissen, Natascha Santacroce, Elodie Burcklen, Christiane Beckmann, Maurice Redondo, Olivier Kobel, Christoph Noppen, Sophie Seidel, Noemie Santamaria de Souza, Niko Beerenwinkel, Tanja Stadler                                                                                                     |
| EPI_ISL_1129327                                                                                                                                                                                                                                                                                                                                                                                                                                                                                                                                                                                                                                                                                                                                                                                                                                                                                                                                                                                                                                                                                                                                                                                                                                                                                                                                                                                                                                                                                                                                                                                                                                                                                                                                                                                                                                                                                                                                                                                                                                                                                                                                                                            | Viollier AG                                                         | Department of Biosystems Science and Engineering, ETH Zürich                     | Chaoran Chen, Sarah Nadeau, Ivan Topolsky, Emmanouil Dermitzakis, Keith Harshman, Ioannis Xenarios, Henri Pegeot, Lorenzo Cerutti, Deborah Penet, Philipp Jablonski, Lara Fuhrmann, David Dreifuss, Katharina Jahn, Christiane Beckmann, Maurice Redondo, Olivier Kobel, Christoph Noppen, Sophie Seidel, Noemie Santamaria de Souza, Niko Beerenwinkel, Tanja Stadler                                                                                                  |
| EPI_ISL_1129329, EPI_ISL_1129336, EPI_ISL_1129344                                                                                                                                                                                                                                                                                                                                                                                                                                                                                                                                                                                                                                                                                                                                                                                                                                                                                                                                                                                                                                                                                                                                                                                                                                                                                                                                                                                                                                                                                                                                                                                                                                                                                                                                                                                                                                                                                                                                                                                                                                                                                                                                          | Viollier AG                                                         | Department of Biosystems Science and Engineering, ETH Zürich                     | Chaoran Chen, Sarah Nadeau, Catharine Aquino, Ivan Topolsky, Philipp Jablonski, Lara Fuhrmann, David Dreifuss, Katharina Jahn, Andrea Cabral de Gouvea, Maria Domenica Moccia, Simon Grüter, Timothy Sykes, Lennart Opitz, Griffin White, Laura Neff, Doris Popovic, Andrea Patrignani, Jay Tracy, Ralph Schlapbach, Christiane Beckmann, Maurice Redondo, Olivier Kobel, Christoph Noppen, Sophie Seidel, Noemie Santamaria de Souza, Niko Beerenwinkel, Tanja Stadler |
| EPI_ISL_1129351                                                                                                                                                                                                                                                                                                                                                                                                                                                                                                                                                                                                                                                                                                                                                                                                                                                                                                                                                                                                                                                                                                                                                                                                                                                                                                                                                                                                                                                                                                                                                                                                                                                                                                                                                                                                                                                                                                                                                                                                                                                                                                                                                                            | Viollier AG                                                         | Department of Biosystems Science and Engineering, ETH Zürich                     | Chaoran Chen, Sarah Nadeau, Ivan Topolsky, Emmanouil Dermitzakis, Keith Harshman, Ioannis Xenarios, Henri Pegeot, Lorenzo Cerutti, Deborah Penet, Philipp Jablonski, Lara Fuhrmann, David Dreifuss, Katharina Jahn, Christiane Beckmann, Maurice Redondo, Olivier Kobel, Christoph Noppen, Sophie Seidel, Noemie Santamaria de Souza, Niko Beerenwinkel, Tanja Stadler                                                                                                  |
| EPI_ISL_1129352, EPI_ISL_1129364, EPI_ISL_1129369, EPI_ISL_1129371                                                                                                                                                                                                                                                                                                                                                                                                                                                                                                                                                                                                                                                                                                                                                                                                                                                                                                                                                                                                                                                                                                                                                                                                                                                                                                                                                                                                                                                                                                                                                                                                                                                                                                                                                                                                                                                                                                                                                                                                                                                                                                                         | Viollier AG                                                         | Department of Biosystems Science and Engineering, ETH Zürich                     | Chaoran Chen, Sarah Nadeau, Catharine Aquino, Ivan Topolsky, Philipp Jablonski, Lara Fuhrmann, David Dreifuss, Katharina Jahn, Andrea Cabral de Gouvea, Maria Domenica Moccia, Simon Grüter, Timothy Sykes, Lennart Opitz, Griffin White, Laura Neff, Doris Popovic, Andrea Patrignani, Jay Tracy, Ralph Schlapbach, Christiane Beckmann, Maurice Redondo, Olivier Kobel, Christoph Noppen, Sophie Seidel, Noemie Santamaria de Souza, Niko Beerenwinkel, Tanja Stadler |
| EPI_ISL_1129375, EPI_ISL_1129379                                                                                                                                                                                                                                                                                                                                                                                                                                                                                                                                                                                                                                                                                                                                                                                                                                                                                                                                                                                                                                                                                                                                                                                                                                                                                                                                                                                                                                                                                                                                                                                                                                                                                                                                                                                                                                                                                                                                                                                                                                                                                                                                                           | Viollier AG                                                         | Department of Biosystems Science and Engineering, ETH Zürich                     | Christian Beisel, Sarah Nadeau, Chaoran Chen, Ivan Topolsky, Philipp Jablonski, Lara Fuhrmann, David Dreifuss, Katharina Jahn, Rebecca Denes, Mirjam Feldkamp, Ina Nissen, Natascha Santacroce, Elodie Burcklen, Christiane Beckmann, Maurice Redondo, Olivier Kobel, Christoph Noppen, Sophie Seidel, Noemie Santamaria de Souza, Niko Beerenwinkel, Tanja Stadler                                                                                                     |
| EPI_ISL_1129380                                                                                                                                                                                                                                                                                                                                                                                                                                                                                                                                                                                                                                                                                                                                                                                                                                                                                                                                                                                                                                                                                                                                                                                                                                                                                                                                                                                                                                                                                                                                                                                                                                                                                                                                                                                                                                                                                                                                                                                                                                                                                                                                                                            | Viollier AG                                                         | Department of Biosystems Science and Engineering, ETH Zürich                     | Chaoran Chen, Sarah Nadeau, Ivan Topolsky, Emmanouil Dermitzakis, Keith Harshman, Ioannis Xenarios, Henri Pegeot, Lorenzo Cerutti, Deborah Penet, Philipp Jablonski, Lara Fuhrmann, David Dreifuss, Katharina Jahn, Christiane Beckmann, Maurice Redondo, Olivier Kobel, Christoph Noppen, Sophie Seidel, Noemie Santamaria de Souza, Niko Beerenwinkel, Tanja Stadler                                                                                                  |
| EPI_ISL_1129394, EPI_ISL_1129400                                                                                                                                                                                                                                                                                                                                                                                                                                                                                                                                                                                                                                                                                                                                                                                                                                                                                                                                                                                                                                                                                                                                                                                                                                                                                                                                                                                                                                                                                                                                                                                                                                                                                                                                                                                                                                                                                                                                                                                                                                                                                                                                                           | Viollier AG                                                         | Department of Biosystems Science and Engineering, ETH Zürich                     | Chaoran Chen, Sarah Nadeau, Catharine Aquino, Ivan Topolsky, Philipp Jablonski, Lara Fuhrmann, David Dreifuss, Katharina Jahn, Andrea Cabral de Gouvea, Maria Domenica Moccia, Simon Grüter, Timothy Sykes, Lennart Opitz, Griffin White, Laura Neff, Doris Popovic, Andrea Patrignani, Jay Tracy, Ralph Schlapbach, Christiane Beckmann, Maurice Redondo, Olivier Kobel, Christoph Noppen, Sophie Seidel, Noemie Santamaria de Souza, Niko Beerenwinkel, Tanja Stadler |
| EPI_ISL_1129410                                                                                                                                                                                                                                                                                                                                                                                                                                                                                                                                                                                                                                                                                                                                                                                                                                                                                                                                                                                                                                                                                                                                                                                                                                                                                                                                                                                                                                                                                                                                                                                                                                                                                                                                                                                                                                                                                                                                                                                                                                                                                                                                                                            | Viollier AG                                                         | Department of Biosystems Science and Engineering, ETH Zürich                     | Chaoran Chen, Sarah Nadeau, Ivan Topolsky, Emmanouil Dermitzakis, Keith Harshman, Ioannis Xenarios, Henri Pegeot, Lorenzo Cerutti, Deborah Penet, Philipp Jablonski, Lara Fuhrmann, David Dreifuss, Katharina Jahn, Christiane Beckmann, Maurice Redondo, Olivier Kobel, Christoph Noppen, Sophie Seidel, Noemie Santamaria de Souza, Niko Beerenwinkel, Tanja Stadler                                                                                                  |
| EPI_ISL_1129414                                                                                                                                                                                                                                                                                                                                                                                                                                                                                                                                                                                                                                                                                                                                                                                                                                                                                                                                                                                                                                                                                                                                                                                                                                                                                                                                                                                                                                                                                                                                                                                                                                                                                                                                                                                                                                                                                                                                                                                                                                                                                                                                                                            | Viollier AG                                                         | Department of Biosystems Science and Engineering, ETH Zürich                     | Chaoran Chen, Sarah Nadeau, Catharine Aquino, Ivan Topolsky, Philipp Jablonski, Lara Fuhrmann, David Dreifuss, Katharina Jahn, Andrea Cabral de Gouvea, Maria Domenica Moccia, Simon Grüter, Timothy Sykes, Lennart Opitz, Griffin White, Laura Neff, Doris Popovic, Andrea Patrignani, Jay Tracy, Ralph Schlapbach, Christiane Beckmann, Maurice Redondo, Olivier Kobel, Christoph Noppen, Sophie Seidel, Noemie Santamaria de Souza, Niko Beerenwinkel, Tanja Stadler |
| EPI_ISL_1129419                                                                                                                                                                                                                                                                                                                                                                                                                                                                                                                                                                                                                                                                                                                                                                                                                                                                                                                                                                                                                                                                                                                                                                                                                                                                                                                                                                                                                                                                                                                                                                                                                                                                                                                                                                                                                                                                                                                                                                                                                                                                                                                                                                            | Viollier AG                                                         | Department of Biosystems Science and Engineering, ETH Zürich                     | Chaoran Chen, Sarah Nadeau, Ivan Topolsky, Emmanouil Dermitzakis, Keith Harshman, Ioannis Xenarios, Henri Pegeot, Lorenzo Cerutti, Deborah Penet, Philipp Jablonski, Lara Fuhrmann, David Dreifuss, Katharina Jahn, Christiane Beckmann, Maurice Redondo, Olivier Kobel, Christoph Noppen, Sophie                                                                                                                                                                       |











[illegible]

[illegible]

[illegible]



[illegible]



|                                                                                                                                                                          |                                                                                            |                                                                                                                         |                                                                                                                                                                                                                |
|--------------------------------------------------------------------------------------------------------------------------------------------------------------------------|--------------------------------------------------------------------------------------------|-------------------------------------------------------------------------------------------------------------------------|----------------------------------------------------------------------------------------------------------------------------------------------------------------------------------------------------------------|
| EPI_ISL_1135058                                                                                                                                                          | ORIAPOLE - BACTERIOLOGIE                                                                   | CNR Virus des Infections Respiratoires - France SUD                                                                     | Antonin Bal, Gregory Destras, Gwendolynne Burfin, Hadrien Regue, Quentin Semanas, Martine Valette, Bruno Lina, Laurence Josset                                                                                 |
| EPI_ISL_1136844                                                                                                                                                          | Nevada State Public Health Laboratory                                                      | Nevada State Public Health Laboratory                                                                                   | Andrew Gorzalski, Mark Pandori                                                                                                                                                                                 |
| EPI_ISL_1137017, EPI_ISL_1137021, EPI_ISL_1137023, EPI_ISL_1137024                                                                                                       | Delaware Public Health Lab                                                                 | Delaware Public Health Lab                                                                                              | Gregory Hovan                                                                                                                                                                                                  |
| EPI_ISL_1137186, EPI_ISL_1137187, EPI_ISL_1137188, EPI_ISL_1137189, EPI_ISL_1137190, EPI_ISL_1137191, EPI_ISL_1137192, EPI_ISL_1137193, EPI_ISL_1137194                  | UPMC Clinical Microbiology Laboratory                                                      | Microbial Genome Sequencing Center; Microbial Genomic Epidemiology Laboratory, University of Pittsburgh                 | Lee H. Harrison, Jane W. Marsh, Marissa P. Griffith, Stephanie L. Mitchell, Vatsala R. Srinivasa, Kady D. Waggle, Daniel J. Snyder, Vaughn S. Cooper                                                           |
| EPI_ISL_1137492, EPI_ISL_1137494, EPI_ISL_1137497, EPI_ISL_1137499, EPI_ISL_1137500, EPI_ISL_1137501, EPI_ISL_1137502                                                    | New Jersey Department of Health, Public Health and Environmental Laboratories              | New Jersey Public Health and Environmental Laboratories                                                                 | Lindsey Bodnar, Shiv K. Verma, Dana Woell, Byeong Jeong                                                                                                                                                        |
| EPI_ISL_1137611                                                                                                                                                          | General Hospital - Tetovo                                                                  | Research Center for Genetic Engineering and Biotechnology "Georgi D. Efremov" , Macedonian Academy of Sciences and Arts | Aleksandar J. Dimovski, Dijana Plasheska-Karanfilska, Predrag Noveski, Gjorgji Bozinovski, Milena Jakimovska                                                                                                   |
| EPI_ISL_1137612                                                                                                                                                          | General Hospital - Prilep                                                                  | Research Center for Genetic Engineering and Biotechnology "Georgi D. Efremov" , Macedonian Academy of Sciences and Arts | Aleksandar J. Dimovski, Dijana Plasheska-Karanfilska, Predrag Noveski, Gjorgji Bozinovski, Milena Jakimovska                                                                                                   |
| EPI_ISL_1137614                                                                                                                                                          | General Hospital - Tetovo                                                                  | Research Center for Genetic Engineering and Biotechnology "Georgi D. Efremov" , Macedonian Academy of Sciences and Arts | Aleksandar J. Dimovski, Dijana Plasheska-Karanfilska, Predrag Noveski, Gjorgji Bozinovski, Milena Jakimovska                                                                                                   |
| EPI_ISL_1137620                                                                                                                                                          | General Hospital - Prilep                                                                  | Research Center for Genetic Engineering and Biotechnology "Georgi D. Efremov" , Macedonian Academy of Sciences and Arts | Aleksandar J. Dimovski, Dijana Plasheska-Karanfilska, Predrag Noveski, Gjorgji Bozinovski, Milena Jakimovska                                                                                                   |
| EPI_ISL_1137621                                                                                                                                                          | Laboratoire central de Virologie                                                           | Laboratoire de Biotechnologie                                                                                           | Myriam Seffar, Hakima Kabbaj, Ghizlane EL Amin, Amal Zouaki, Abdelomunim Essabbar, Tarik Aanniz, Mouna Ouadghiri, Saaïd Amzazi, Lahcen Belyamani and Azeddine Ibrahim                                          |
| EPI_ISL_1137622                                                                                                                                                          | General Hospital - Strumica                                                                | Research Center for Genetic Engineering and Biotechnology "Georgi D. Efremov" , Macedonian Academy of Sciences and Arts | Aleksandar J. Dimovski, Dijana Plasheska-Karanfilska, Predrag Noveski, Gjorgji Bozinovski, Milena Jakimovska                                                                                                   |
| EPI_ISL_1137623                                                                                                                                                          | General Hospital - Shtip                                                                   | Research Center for Genetic Engineering and Biotechnology "Georgi D. Efremov" , Macedonian Academy of Sciences and Arts | Aleksandar J. Dimovski, Dijana Plasheska-Karanfilska, Predrag Noveski, Gjorgji Bozinovski, Milena Jakimovska                                                                                                   |
| EPI_ISL_1138222                                                                                                                                                          | General Hospital - Ohrid                                                                   | Research Center for Genetic Engineering and Biotechnology "Georgi D. Efremov" , Macedonian Academy of Sciences and Arts | Aleksandar J. Dimovski, Dijana Plasheska-Karanfilska, Predrag Noveski, Gjorgji Bozinovski, Milena Jakimovska                                                                                                   |
| EPI_ISL_1138406                                                                                                                                                          | General Hospital - Shtip                                                                   | Research Center for Genetic Engineering and Biotechnology "Georgi D. Efremov" , Macedonian Academy of Sciences and Arts | Aleksandar J. Dimovski, Dijana Plasheska-Karanfilska, Predrag Noveski, Gjorgji Bozinovski, Milena Jakimovska                                                                                                   |
| EPI_ISL_1138410                                                                                                                                                          | General Hospital - Ohrid                                                                   | Research Center for Genetic Engineering and Biotechnology "Georgi D. Efremov" , Macedonian Academy of Sciences and Arts | Aleksandar J. Dimovski, Dijana Plasheska-Karanfilska, Predrag Noveski, Gjorgji Bozinovski, Milena Jakimovska                                                                                                   |
| EPI_ISL_1138412                                                                                                                                                          | General Hospital - Shtip                                                                   | Research Center for Genetic Engineering and Biotechnology "Georgi D. Efremov" , Macedonian Academy of Sciences and Arts | Aleksandar J. Dimovski, Dijana Plasheska-Karanfilska, Predrag Noveski, Gjorgji Bozinovski, Milena Jakimovska                                                                                                   |
| EPI_ISL_1138414, EPI_ISL_1138415, EPI_ISL_1138417, EPI_ISL_1138419, EPI_ISL_1138420, EPI_ISL_1138421                                                                     | Laboratorio de Referencia Nacional de Virus Respiratorio. Instituto Nacional de Salud Perú | Laboratorio de Referencia Nacional de Biotecnología y Biología Molecular. Instituto Nacional de Salud Perú              | Carlos Padilla Rojas, Karolyn Vega Chozo, Luis Barcena, Priscila Lope Pari, Omar Caceres Rey, Marco Galarza Perez, Maribel Huaranga Nuñez, Johanna Balbuena Torrez, Henri Bailon Calderon, Nancy Rojas Serrano |
| EPI_ISL_1138423                                                                                                                                                          | General Hospital - Ohrid                                                                   | Research Center for Genetic Engineering and Biotechnology "Georgi D. Efremov" , Macedonian Academy of Sciences and Arts | Aleksandar J. Dimovski, Dijana Plasheska-Karanfilska, Predrag Noveski, Gjorgji Bozinovski, Milena Jakimovska                                                                                                   |
| EPI_ISL_1138424                                                                                                                                                          | General Hospital - Struga                                                                  | Research Center for Genetic Engineering and Biotechnology "Georgi D. Efremov" , Macedonian Academy of Sciences and Arts | Aleksandar J. Dimovski, Dijana Plasheska-Karanfilska, Predrag Noveski, Gjorgji Bozinovski, Milena Jakimovska                                                                                                   |
| EPI_ISL_1138516, EPI_ISL_1138517, EPI_ISL_1138518                                                                                                                        | SA Pärnu Hospital Laboratory                                                               | 1. Laboratory of Communicable Diseases (Estonia); 2. Eurofins Genomics Europe Sequencing GmbH                           | Lidia Dotsenko                                                                                                                                                                                                 |
| EPI_ISL_1138519, EPI_ISL_1138520, EPI_ISL_1138521, EPI_ISL_1138523                                                                                                       | Laboratory of Communicable Diseases                                                        | 1. Laboratory of Communicable Diseases (Estonia); 2. Eurofins Genomics Europe Sequencing GmbH                           | Lidia Dotsenko                                                                                                                                                                                                 |
| EPI_ISL_1138524, EPI_ISL_1138525                                                                                                                                         | SA Pärnu Hospital Laboratory                                                               | 1. Laboratory of Communicable Diseases (Estonia); 2. Eurofins Genomics Europe Sequencing GmbH                           | Lidia Dotsenko                                                                                                                                                                                                 |
| EPI_ISL_1138526, EPI_ISL_1138527, EPI_ISL_1138528, EPI_ISL_1138530, EPI_ISL_1138531, EPI_ISL_1138532, EPI_ISL_1138533, EPI_ISL_1138534, EPI_ISL_1138535, EPI_ISL_1138536 | Laboratory of Communicable Diseases                                                        | 1. Laboratory of Communicable Diseases (Estonia); 2. Eurofins Genomics Europe Sequencing GmbH                           | Lidia Dotsenko                                                                                                                                                                                                 |
| EPI_ISL_1138537                                                                                                                                                          | SA Pärnu Hospital Laboratory                                                               | 1. Laboratory of Communicable Diseases (Estonia); 2. Eurofins Genomics Europe Sequencing GmbH                           | Lidia Dotsenko                                                                                                                                                                                                 |
| EPI_ISL_1138538, EPI_ISL_1138539, EPI_ISL_1138540, EPI_ISL_1138541                                                                                                       | Laboratory of Communicable Diseases                                                        | 1. Laboratory of Communicable Diseases (Estonia); 2. Eurofins Genomics Europe Sequencing GmbH                           | Lidia Dotsenko                                                                                                                                                                                                 |
| EPI_ISL_1138543                                                                                                                                                          | SA Pärnu Hospital Laboratory                                                               | 1. Laboratory of Communicable Diseases (Estonia); 2. Eurofins Genomics Europe Sequencing GmbH                           | Lidia Dotsenko                                                                                                                                                                                                 |
| EPI_ISL_1138544, EPI_ISL_1138545, EPI_ISL_1138546                                                                                                                        | Laboratory of Communicable Diseases                                                        | 1. Laboratory of Communicable Diseases (Estonia); 2. Eurofins Genomics Europe Sequencing GmbH                           | Lidia Dotsenko                                                                                                                                                                                                 |
| EPI_ISL_1138547                                                                                                                                                          | SA Pärnu Hospital Laboratory                                                               | 1. Laboratory of Communicable Diseases (Estonia); 2.                                                                    | Lidia Dotsenko                                                                                                                                                                                                 |

|                                                                                                                                                                                                                                                                                                                                                                                                                                                                                                                                                                                                                                                                                                                                                                                                                                                                                                                                                                                                                                                            |                                                                                                                                                   |                                                                                                                                                                        |                                                                                                                                                                                                                                           |
|------------------------------------------------------------------------------------------------------------------------------------------------------------------------------------------------------------------------------------------------------------------------------------------------------------------------------------------------------------------------------------------------------------------------------------------------------------------------------------------------------------------------------------------------------------------------------------------------------------------------------------------------------------------------------------------------------------------------------------------------------------------------------------------------------------------------------------------------------------------------------------------------------------------------------------------------------------------------------------------------------------------------------------------------------------|---------------------------------------------------------------------------------------------------------------------------------------------------|------------------------------------------------------------------------------------------------------------------------------------------------------------------------|-------------------------------------------------------------------------------------------------------------------------------------------------------------------------------------------------------------------------------------------|
| EPI_ISL_1138548, EPI_ISL_1138549, EPI_ISL_1138550, EPI_ISL_1138552                                                                                                                                                                                                                                                                                                                                                                                                                                                                                                                                                                                                                                                                                                                                                                                                                                                                                                                                                                                         | Laboratory of Communicable Diseases                                                                                                               | Eurofins Genomics Europe Sequencing GmbH<br>1. Laboratory of Communicable Diseases (Estonia); 2. Eurofins Genomics Europe Sequencing GmbH                              | Lidia Dotsenko                                                                                                                                                                                                                            |
| EPI_ISL_1138745                                                                                                                                                                                                                                                                                                                                                                                                                                                                                                                                                                                                                                                                                                                                                                                                                                                                                                                                                                                                                                            | Analysis laboratory                                                                                                                               | National Reference Center for Viruses of Respiratory Infections, Institut Pasteur, Paris                                                                               | Marion Barbet, Sylvie Behillil, Méline Bizard, Angela Brisebarre, Camille Capel, Etienne Simon-Lorière, Vincent Enouf, Maud Vanpeene, Sylvie van der Werf, J. Besson                                                                      |
| EPI_ISL_1138764, EPI_ISL_1138766, EPI_ISL_1138767, EPI_ISL_1138768, EPI_ISL_1138769, EPI_ISL_1138770, EPI_ISL_1138771, EPI_ISL_1138772, EPI_ISL_1138773, EPI_ISL_1138774, EPI_ISL_1138775, EPI_ISL_1138776, EPI_ISL_1138777, EPI_ISL_1138778, EPI_ISL_1138779, EPI_ISL_1138780, EPI_ISL_1138781, EPI_ISL_1138782, EPI_ISL_1138783, EPI_ISL_1138784, EPI_ISL_1138785, EPI_ISL_1138786, EPI_ISL_1138787, EPI_ISL_1138789, EPI_ISL_1138790, EPI_ISL_1138791, EPI_ISL_1138792, EPI_ISL_1138793, EPI_ISL_1138795, EPI_ISL_1138796, EPI_ISL_1138797, EPI_ISL_1138798, EPI_ISL_1138799, EPI_ISL_1138800, EPI_ISL_1138801, EPI_ISL_1138802, EPI_ISL_1138803, EPI_ISL_1138804, EPI_ISL_1138805, EPI_ISL_1138806, EPI_ISL_1138807, EPI_ISL_1138808, EPI_ISL_1138809, EPI_ISL_1138811, EPI_ISL_1138812, EPI_ISL_1138813, EPI_ISL_1138814, EPI_ISL_1138815, EPI_ISL_1138816, EPI_ISL_1138817, EPI_ISL_1138818, EPI_ISL_1138819, EPI_ISL_1138820, EPI_ISL_1138821, EPI_ISL_1138822, EPI_ISL_1138823, EPI_ISL_1138824, EPI_ISL_1138825, EPI_ISL_1138826, EPI_ISL_1138827 |                                                                                                                                                   |                                                                                                                                                                        |                                                                                                                                                                                                                                           |
| see above                                                                                                                                                                                                                                                                                                                                                                                                                                                                                                                                                                                                                                                                                                                                                                                                                                                                                                                                                                                                                                                  | Centro Hospitalar do Baixo Vouga (CHBV)                                                                                                           | Institute of Biomedicine (IBIMED), Universidade de Aveiro                                                                                                              | Gabriela Moura, Sofia Marques, Patrícia Arinto, Miguel Pinheiro and Manuel Santos                                                                                                                                                         |
| EPI_ISL_1138884                                                                                                                                                                                                                                                                                                                                                                                                                                                                                                                                                                                                                                                                                                                                                                                                                                                                                                                                                                                                                                            | Jessa                                                                                                                                             | Jessa                                                                                                                                                                  | Cruys et al. on behalf of the Jessa_cmdLab                                                                                                                                                                                                |
| EPI_ISL_1138888                                                                                                                                                                                                                                                                                                                                                                                                                                                                                                                                                                                                                                                                                                                                                                                                                                                                                                                                                                                                                                            | AZV                                                                                                                                               | Jessa                                                                                                                                                                  | Cruys et al. on behalf of the Jessa_cmdLab                                                                                                                                                                                                |
| EPI_ISL_1138899                                                                                                                                                                                                                                                                                                                                                                                                                                                                                                                                                                                                                                                                                                                                                                                                                                                                                                                                                                                                                                            | Laboratory for HIV and opportunistic infections diagnosis The Republican Research and Practical Center for Epidemiology and Microbiology (RRPCEM) | Laboratory for HIV and opportunistic infections diagnosis The Republican Research and Practical Center for Epidemiology and Microbiology (RRPCEM)                      | Elena Gasich, Kirill Bulda, Artur Akhremchuk, Leonid Valentovich, Anatoly Krasko, Vladimir Gorbunov                                                                                                                                       |
| EPI_ISL_1138941, EPI_ISL_1138942, EPI_ISL_1138943                                                                                                                                                                                                                                                                                                                                                                                                                                                                                                                                                                                                                                                                                                                                                                                                                                                                                                                                                                                                          | Division of Emerging Infectious Diseases, Bureau of Infectious Diseases Diagnosis Control, Korea Disease Control and Prevention Agency            | Division of Emerging Infectious Diseases, Bureau of Infectious Diseases Diagnosis Control, Korea Disease Control and Prevention Agency                                 | Ae Kyung Park, Il-Hwan Kim, Heui Man Kim, Jeong-Min Kim, Namjoo Lee, Chae Young Lee, Sang Hee Woo, Eun-Jin Kim                                                                                                                            |
| EPI_ISL_1138969                                                                                                                                                                                                                                                                                                                                                                                                                                                                                                                                                                                                                                                                                                                                                                                                                                                                                                                                                                                                                                            | Laboratory for HIV and opportunistic infections diagnosis The Republican Research and Practical Center for Epidemiology and Microbiology (RRPCEM) | Laboratory for HIV and opportunistic infections diagnosis The Republican Research and Practical Center for Epidemiology and Microbiology (RRPCEM)                      | Elena Gasich, Kirill Bulda, Artur Akhremchuk, Leonid Valentovich, Analoly Krasko, Vladimir Gorbunov                                                                                                                                       |
| EPI_ISL_1138983                                                                                                                                                                                                                                                                                                                                                                                                                                                                                                                                                                                                                                                                                                                                                                                                                                                                                                                                                                                                                                            | Laboratory for HIV and opportunistic infections diagnosis The Republican Research and Practical Center for Epidemiology and Microbiology (RRPCEM) | Laboratory for HIV and opportunistic infections diagnosis The Republican Research and Practical Center for Epidemiology and Microbiology (RRPCEM)                      | Elena Gasich, Kirill Bulda, Artur Akhremchuk, Leonid Valentovich, Anatoly Krasko, Vladimir Gorbunov                                                                                                                                       |
| EPI_ISL_1139059                                                                                                                                                                                                                                                                                                                                                                                                                                                                                                                                                                                                                                                                                                                                                                                                                                                                                                                                                                                                                                            | LACEN do Mato Grosso do Sul                                                                                                                       | Instituto Adolfo Lutz, Interdisciplinary Procedures Center, Strategic Laboratory                                                                                       | Claudio Tavares Sacchi, Claudia Regina Gonçalves, Erica Valesa Ramos Gomes, Karoline Rodrigues Campos, Caio Vinicius Dias Lopes                                                                                                           |
| EPI_ISL_1139146, EPI_ISL_1139147                                                                                                                                                                                                                                                                                                                                                                                                                                                                                                                                                                                                                                                                                                                                                                                                                                                                                                                                                                                                                           | National Center of Disease Control and Prevention of the Republic of Armenia                                                                      | Institute of Molecular Biology NAS RA, Republic of Armenia, Department of Bioengineering, BioinformaticsInstitute and Molecular Biology IBMPH RAU, Republic of Armenia | Zaven Karalyan, Arsen Arakelyan, Diana Avetyan, Siras Hakobyan, Gisane Khachatyan, Maria Nikoghosyan, Tamara Sirunyan, Nelli Muradyan, Andranik Chavushyan, Hovsep Ghazaryan, Roksana Zakharyan, Shushan Sargsryan, Gayane Melik-Pashayan |
| EPI_ISL_1139148, EPI_ISL_1139149, EPI_ISL_1139150, EPI_ISL_1139151, EPI_ISL_1139152, EPI_ISL_1139153, EPI_ISL_1139154, EPI_ISL_1139155, EPI_ISL_1139156, EPI_ISL_1139157                                                                                                                                                                                                                                                                                                                                                                                                                                                                                                                                                                                                                                                                                                                                                                                                                                                                                   | National Center of Disease Control and Prevention of the Republic of Armenia                                                                      | Institute of Molecular Biology NAS RA, Republic of Armenia, Department of Bioengineering, BioinformaticsInstitute and Molecular Biology IBMPH RAU, Republic of Armenia | Arsen Arakelyan, Diana Avetyan, Siras Hakobyan, Gisane Khachatyan, Maria Nikoghosyan, Tamara Sirunyan, Nelli Muradyan, Andranik Chavushyan, Hovsep Ghazaryan, Roksana Zakharyan, Shushan Sargsryan, Gayane Melik-Pashayan                 |
| EPI_ISL_1140095                                                                                                                                                                                                                                                                                                                                                                                                                                                                                                                                                                                                                                                                                                                                                                                                                                                                                                                                                                                                                                            | Lithuanian University of Health Sciences Hospital, Department of Laboratory Medicine                                                              | Lithuanian University of Health Sciences Hospital, Department of Genetics and Molecular Medicine                                                                       | Rasa Ugenskien, Darius ereškevius, Inga Nasvytien, Živil Žemeckien, Mantas Šarauskas, Marius Šukys, Astra Vitkauskien, Renaldas Jurkevilius                                                                                               |
| EPI_ISL_1140179                                                                                                                                                                                                                                                                                                                                                                                                                                                                                                                                                                                                                                                                                                                                                                                                                                                                                                                                                                                                                                            | Labor Dr. Wisplinghoff - Berlin                                                                                                                   | Robert Koch Institute                                                                                                                                                  | unknown                                                                                                                                                                                                                                   |
| EPI_ISL_1140479                                                                                                                                                                                                                                                                                                                                                                                                                                                                                                                                                                                                                                                                                                                                                                                                                                                                                                                                                                                                                                            | MVZ Laborärzte Singen Labor Blessing                                                                                                              | Robert Koch Institute                                                                                                                                                  | unknown                                                                                                                                                                                                                                   |
| EPI_ISL_1140481, EPI_ISL_1140482, EPI_ISL_1140483, EPI_ISL_1140484                                                                                                                                                                                                                                                                                                                                                                                                                                                                                                                                                                                                                                                                                                                                                                                                                                                                                                                                                                                         | LADR MVZ Zweigpraxis Bernau                                                                                                                       | Robert Koch Institute                                                                                                                                                  | unknown                                                                                                                                                                                                                                   |
| EPI_ISL_1140511, EPI_ISL_1140517, EPI_ISL_1140518                                                                                                                                                                                                                                                                                                                                                                                                                                                                                                                                                                                                                                                                                                                                                                                                                                                                                                                                                                                                          | Institut für Virologie des Universitätsklinikums Tübingen                                                                                         | Robert Koch Institute                                                                                                                                                  | unknown                                                                                                                                                                                                                                   |
| EPI_ISL_1140540, EPI_ISL_1140541, EPI_ISL_1140542, EPI_ISL_1140543, EPI_ISL_1140544, EPI_ISL_1140545, EPI_ISL_1140546, EPI_ISL_1140547, EPI_ISL_1140548, EPI_ISL_1140549, EPI_ISL_1140550, EPI_ISL_1140551                                                                                                                                                                                                                                                                                                                                                                                                                                                                                                                                                                                                                                                                                                                                                                                                                                                 |                                                                                                                                                   |                                                                                                                                                                        |                                                                                                                                                                                                                                           |
| see above                                                                                                                                                                                                                                                                                                                                                                                                                                                                                                                                                                                                                                                                                                                                                                                                                                                                                                                                                                                                                                                  | LADR MVZ Zweigpraxis Bernau                                                                                                                       | Robert Koch Institute                                                                                                                                                  | unknown                                                                                                                                                                                                                                   |
| EPI_ISL_1140572, EPI_ISL_1140590, EPI_ISL_1140591, EPI_ISL_1140600, EPI_ISL_1140602, EPI_ISL_1140605, EPI_ISL_1140640, EPI_ISL_1140642, EPI_ISL_1140643, EPI_ISL_1140648, EPI_ISL_1140649, EPI_ISL_1140652, EPI_ISL_1140657, EPI_ISL_1140660                                                                                                                                                                                                                                                                                                                                                                                                                                                                                                                                                                                                                                                                                                                                                                                                               |                                                                                                                                                   |                                                                                                                                                                        |                                                                                                                                                                                                                                           |
| see above                                                                                                                                                                                                                                                                                                                                                                                                                                                                                                                                                                                                                                                                                                                                                                                                                                                                                                                                                                                                                                                  | Bioscientia Labor Wermsdorf                                                                                                                       | Robert Koch Institute                                                                                                                                                  | unknown                                                                                                                                                                                                                                   |
| EPI_ISL_1140667                                                                                                                                                                                                                                                                                                                                                                                                                                                                                                                                                                                                                                                                                                                                                                                                                                                                                                                                                                                                                                            | Sonic - MVZ Medizinisches Labor Bremen GmbH                                                                                                       | Robert Koch Institute                                                                                                                                                  | unknown                                                                                                                                                                                                                                   |
| EPI_ISL_1140669, EPI_ISL_1140676, EPI_ISL_1140689, EPI_ISL_1140690, EPI_ISL_1140701, EPI_ISL_1140704, EPI_ISL_1140705, EPI_ISL_1140707, EPI_ISL_1140709, EPI_ISL_1140710, EPI_ISL_1140716, EPI_ISL_1140720, EPI_ISL_1140725, EPI_ISL_1140736                                                                                                                                                                                                                                                                                                                                                                                                                                                                                                                                                                                                                                                                                                                                                                                                               |                                                                                                                                                   |                                                                                                                                                                        |                                                                                                                                                                                                                                           |
| see above                                                                                                                                                                                                                                                                                                                                                                                                                                                                                                                                                                                                                                                                                                                                                                                                                                                                                                                                                                                                                                                  | Bioscientia Labor Wermsdorf                                                                                                                       | Robert Koch Institute                                                                                                                                                  | unknown                                                                                                                                                                                                                                   |
| EPI_ISL_1140754                                                                                                                                                                                                                                                                                                                                                                                                                                                                                                                                                                                                                                                                                                                                                                                                                                                                                                                                                                                                                                            | Sonic - MVZ Medizinisches Labor Bremen GmbH                                                                                                       | Robert Koch Institute                                                                                                                                                  | unknown                                                                                                                                                                                                                                   |
| EPI_ISL_1140756, EPI_ISL_1140757, EPI_ISL_1140764, EPI_ISL_1140768, EPI_ISL_1140776, EPI_ISL_1140780, EPI_ISL_1140781                                                                                                                                                                                                                                                                                                                                                                                                                                                                                                                                                                                                                                                                                                                                                                                                                                                                                                                                      | Bioscientia Labor Wermsdorf                                                                                                                       | Robert Koch Institute                                                                                                                                                  | unknown                                                                                                                                                                                                                                   |
| EPI_ISL_1140795                                                                                                                                                                                                                                                                                                                                                                                                                                                                                                                                                                                                                                                                                                                                                                                                                                                                                                                                                                                                                                            | Sonic - MVZ Medizinisches Labor Bremen GmbH                                                                                                       | Robert Koch Institute                                                                                                                                                  | unknown                                                                                                                                                                                                                                   |
| EPI_ISL_1140798, EPI_ISL_1140800, EPI_ISL_1140802, EPI_ISL_1140805, EPI_ISL_1140808, EPI_ISL_1140813, EPI_ISL_1140815, EPI_ISL_1140816, EPI_ISL_1140818, EPI_ISL_1140823, EPI_ISL_1140830, EPI_ISL_1140832, EPI_ISL_1140834                                                                                                                                                                                                                                                                                                                                                                                                                                                                                                                                                                                                                                                                                                                                                                                                                                |                                                                                                                                                   |                                                                                                                                                                        |                                                                                                                                                                                                                                           |
| see above                                                                                                                                                                                                                                                                                                                                                                                                                                                                                                                                                                                                                                                                                                                                                                                                                                                                                                                                                                                                                                                  | Bioscientia Labor Wermsdorf                                                                                                                       | Robert Koch Institute                                                                                                                                                  | unknown                                                                                                                                                                                                                                   |
| EPI_ISL_1140839, EPI_ISL_1140840, EPI_ISL_1140841, EPI_ISL_1140869, EPI_ISL_1140882, EPI_ISL_1140885, EPI_ISL_1140888, EPI_ISL_1140900, EPI_ISL_1140998                                                                                                                                                                                                                                                                                                                                                                                                                                                                                                                                                                                                                                                                                                                                                                                                                                                                                                    | Labor Dr. Wisplinghoff - Berlin                                                                                                                   | Robert Koch Institute                                                                                                                                                  | unknown                                                                                                                                                                                                                                   |
| EPI_ISL_1141010                                                                                                                                                                                                                                                                                                                                                                                                                                                                                                                                                                                                                                                                                                                                                                                                                                                                                                                                                                                                                                            | Labor Kneißler GmbH & Co. KG                                                                                                                      | Robert Koch Institute                                                                                                                                                  | unknown                                                                                                                                                                                                                                   |
| EPI_ISL_1141011, EPI_ISL_1141012                                                                                                                                                                                                                                                                                                                                                                                                                                                                                                                                                                                                                                                                                                                                                                                                                                                                                                                                                                                                                           | Universitätsklinikum Schleswig-Holstein (standortübergreifend inkl. Kiel) - Institut für Klinische Chemie und Laboratoriumsdiagnostik             | Robert Koch Institute                                                                                                                                                  | unknown                                                                                                                                                                                                                                   |
| EPI_ISL_1141016                                                                                                                                                                                                                                                                                                                                                                                                                                                                                                                                                                                                                                                                                                                                                                                                                                                                                                                                                                                                                                            | Labor Kneißler GmbH & Co. KG                                                                                                                      | Robert Koch Institute                                                                                                                                                  | unknown                                                                                                                                                                                                                                   |
| EPI_ISL_1141141, EPI_ISL_1141142, EPI_ISL_1141145, EPI_ISL_1141146, EPI_ISL_1141149, EPI_ISL_1141150,                                                                                                                                                                                                                                                                                                                                                                                                                                                                                                                                                                                                                                                                                                                                                                                                                                                                                                                                                      | Herz- und Diabeteszentrum NRW: Universitätsklinik der Ruhr-Universität Bochum --> Institut für Laboratoriums- und Transfusionsmedizin             | Robert Koch Institute                                                                                                                                                  | unknown                                                                                                                                                                                                                                   |



|                                                                                                                                                                                                                                                                                                                                                                                                                                                                                                                                                                                                                                                                                                        |                                                                                                                                       |                       |         |
|--------------------------------------------------------------------------------------------------------------------------------------------------------------------------------------------------------------------------------------------------------------------------------------------------------------------------------------------------------------------------------------------------------------------------------------------------------------------------------------------------------------------------------------------------------------------------------------------------------------------------------------------------------------------------------------------------------|---------------------------------------------------------------------------------------------------------------------------------------|-----------------------|---------|
| EPI_ISL_1141151, EPI_ISL_1141152                                                                                                                                                                                                                                                                                                                                                                                                                                                                                                                                                                                                                                                                       |                                                                                                                                       |                       |         |
| EPI_ISL_1141156, EPI_ISL_1141158,<br>EPI_ISL_1141159, EPI_ISL_1141161                                                                                                                                                                                                                                                                                                                                                                                                                                                                                                                                                                                                                                  | Uniklinikum Jena                                                                                                                      | Robert Koch Institute | unknown |
| EPI_ISL_1141166, EPI_ISL_1141167,<br>EPI_ISL_1141168, EPI_ISL_1141169                                                                                                                                                                                                                                                                                                                                                                                                                                                                                                                                                                                                                                  | Thüringer Landesamtes für Verbraucherschutz                                                                                           | Robert Koch Institute | unknown |
| EPI_ISL_1141170, EPI_ISL_1141171                                                                                                                                                                                                                                                                                                                                                                                                                                                                                                                                                                                                                                                                       | Uniklinikum Jena                                                                                                                      | Robert Koch Institute | unknown |
| EPI_ISL_1141173                                                                                                                                                                                                                                                                                                                                                                                                                                                                                                                                                                                                                                                                                        | Thüringer Landesamtes für Verbraucherschutz                                                                                           | Robert Koch Institute | unknown |
| EPI_ISL_1141175, EPI_ISL_1141176,<br>EPI_ISL_1141179, EPI_ISL_1141183,<br>EPI_ISL_1141186, EPI_ISL_1141188,<br>EPI_ISL_1141189, EPI_ISL_1141190,<br>EPI_ISL_1141193, EPI_ISL_1141194                                                                                                                                                                                                                                                                                                                                                                                                                                                                                                                   | MVZ Labor Dr. Limbach & Kollegen GbR                                                                                                  | Robert Koch Institute | unknown |
| EPI_ISL_1141236, EPI_ISL_1141247,<br>EPI_ISL_1141250, EPI_ISL_1141261,<br>EPI_ISL_1141262                                                                                                                                                                                                                                                                                                                                                                                                                                                                                                                                                                                                              | Bioscientia Labor Wermsdorf                                                                                                           | Robert Koch Institute | unknown |
| EPI_ISL_1141263                                                                                                                                                                                                                                                                                                                                                                                                                                                                                                                                                                                                                                                                                        | LabKom - Labor Augsburg MVZ GmbH                                                                                                      | Robert Koch Institute | unknown |
| EPI_ISL_1141281, EPI_ISL_1141282                                                                                                                                                                                                                                                                                                                                                                                                                                                                                                                                                                                                                                                                       | Bioscientia Labor Wermsdorf                                                                                                           | Robert Koch Institute | unknown |
| EPI_ISL_1141284                                                                                                                                                                                                                                                                                                                                                                                                                                                                                                                                                                                                                                                                                        | LabKom - Labor Augsburg MVZ GmbH                                                                                                      | Robert Koch Institute | unknown |
| EPI_ISL_1141295, EPI_ISL_1141301, EPI_ISL_1141307, EPI_ISL_1141344, EPI_ISL_1141345, EPI_ISL_1141347, EPI_ISL_1141349, EPI_ISL_1141371, EPI_ISL_1141409, EPI_ISL_1141419, EPI_ISL_1141435, EPI_ISL_1141444, EPI_ISL_1141451, EPI_ISL_1141453                                                                                                                                                                                                                                                                                                                                                                                                                                                           |                                                                                                                                       |                       |         |
| see above                                                                                                                                                                                                                                                                                                                                                                                                                                                                                                                                                                                                                                                                                              | Bioscientia Labor Wermsdorf                                                                                                           | Robert Koch Institute | unknown |
| EPI_ISL_1141454                                                                                                                                                                                                                                                                                                                                                                                                                                                                                                                                                                                                                                                                                        | LabKom - Labor Augsburg MVZ GmbH                                                                                                      | Robert Koch Institute | unknown |
| EPI_ISL_1141469, EPI_ISL_1141476                                                                                                                                                                                                                                                                                                                                                                                                                                                                                                                                                                                                                                                                       | Bioscientia Labor Wermsdorf                                                                                                           | Robert Koch Institute | unknown |
| EPI_ISL_1141477                                                                                                                                                                                                                                                                                                                                                                                                                                                                                                                                                                                                                                                                                        | LabKom - Labor Augsburg MVZ GmbH                                                                                                      | Robert Koch Institute | unknown |
| EPI_ISL_1141497, EPI_ISL_1141509,<br>EPI_ISL_1141510, EPI_ISL_1141515,<br>EPI_ISL_1141517                                                                                                                                                                                                                                                                                                                                                                                                                                                                                                                                                                                                              | Bioscientia Labor Wermsdorf                                                                                                           | Robert Koch Institute | unknown |
| EPI_ISL_1141523                                                                                                                                                                                                                                                                                                                                                                                                                                                                                                                                                                                                                                                                                        | LabKom - Labor Augsburg MVZ GmbH                                                                                                      | Robert Koch Institute | unknown |
| EPI_ISL_1141527, EPI_ISL_1141541, EPI_ISL_1141542, EPI_ISL_1141545, EPI_ISL_1141556, EPI_ISL_1141564, EPI_ISL_1141578, EPI_ISL_1141589, EPI_ISL_1141594, EPI_ISL_1141597, EPI_ISL_1141600, EPI_ISL_1141603, EPI_ISL_1141608, EPI_ISL_1141611                                                                                                                                                                                                                                                                                                                                                                                                                                                           |                                                                                                                                       |                       |         |
| see above                                                                                                                                                                                                                                                                                                                                                                                                                                                                                                                                                                                                                                                                                              | Bioscientia Labor Wermsdorf                                                                                                           | Robert Koch Institute | unknown |
| EPI_ISL_1141615, EPI_ISL_1141620,<br>EPI_ISL_1141624, EPI_ISL_1141625                                                                                                                                                                                                                                                                                                                                                                                                                                                                                                                                                                                                                                  | Herz- und Diabeteszentrum NRW: Universitätsklinik der Ruhr-Universität Bochum --> Institut für Laboratoriums- und Transfusionsmedizin | Robert Koch Institute | unknown |
| EPI_ISL_1141627, EPI_ISL_1141630, EPI_ISL_1141631, EPI_ISL_1141632, EPI_ISL_1141634, EPI_ISL_1141635, EPI_ISL_1141636, EPI_ISL_1141637, EPI_ISL_1141639, EPI_ISL_1141640, EPI_ISL_1141641, EPI_ISL_1141642, EPI_ISL_1141643, EPI_ISL_1141644, EPI_ISL_1141645, EPI_ISL_1141646, EPI_ISL_1141647, EPI_ISL_1141648, EPI_ISL_1141651, EPI_ISL_1141653                                                                                                                                                                                                                                                                                                                                                     |                                                                                                                                       |                       |         |
| see above                                                                                                                                                                                                                                                                                                                                                                                                                                                                                                                                                                                                                                                                                              | Institut für Virologie des Universitätsklinikums Tübingen                                                                             | Robert Koch Institute | unknown |
| EPI_ISL_1141654, EPI_ISL_1141655                                                                                                                                                                                                                                                                                                                                                                                                                                                                                                                                                                                                                                                                       | IMD - Institut für Medizinische Diagnostik Berlin-Potsdam                                                                             | Robert Koch Institute | unknown |
| EPI_ISL_1141656, EPI_ISL_1141657,<br>EPI_ISL_1141658                                                                                                                                                                                                                                                                                                                                                                                                                                                                                                                                                                                                                                                   | LADR MVZ Zweigpraxis Bernau                                                                                                           | Robert Koch Institute | unknown |
| EPI_ISL_1141659, EPI_ISL_1141661, EPI_ISL_1141662, EPI_ISL_1141663, EPI_ISL_1141665, EPI_ISL_1141666, EPI_ISL_1141667, EPI_ISL_1141669, EPI_ISL_1141673, EPI_ISL_1141677, EPI_ISL_1141678, EPI_ISL_1141679, EPI_ISL_1141684, EPI_ISL_1141688, EPI_ISL_1141689, EPI_ISL_1141690, EPI_ISL_1141696, EPI_ISL_1141698, EPI_ISL_1141699, EPI_ISL_1141700                                                                                                                                                                                                                                                                                                                                                     |                                                                                                                                       |                       |         |
| see above                                                                                                                                                                                                                                                                                                                                                                                                                                                                                                                                                                                                                                                                                              | MVZ Labor Dr. Limbach & Kollegen GbR                                                                                                  | Robert Koch Institute | unknown |
| EPI_ISL_1141732                                                                                                                                                                                                                                                                                                                                                                                                                                                                                                                                                                                                                                                                                        | LADR Zentrallabor DR. Kramer & Kollegen Geesthacht                                                                                    | Robert Koch Institute | unknown |
| EPI_ISL_1141941, EPI_ISL_1141942, EPI_ISL_1141945, EPI_ISL_1141949, EPI_ISL_1141952, EPI_ISL_1141956, EPI_ISL_1141957, EPI_ISL_1141969, EPI_ISL_1141970, EPI_ISL_1141972, EPI_ISL_1141974, EPI_ISL_1141975, EPI_ISL_1141977, EPI_ISL_1141978, EPI_ISL_1141982, EPI_ISL_1142000, EPI_ISL_1142009, EPI_ISL_1142013, EPI_ISL_1142016, EPI_ISL_1142018, EPI_ISL_1142019, EPI_ISL_1142029, EPI_ISL_1142031, EPI_ISL_1142039, EPI_ISL_1142049, EPI_ISL_1142050, EPI_ISL_1142051, EPI_ISL_1142054, EPI_ISL_1142055, EPI_ISL_1142057, EPI_ISL_1142058, EPI_ISL_1142060, EPI_ISL_1142064, EPI_ISL_1142065, EPI_ISL_1142073, EPI_ISL_1142074, EPI_ISL_1142075, EPI_ISL_1142077, EPI_ISL_1142079, EPI_ISL_1142080 |                                                                                                                                       |                       |         |
| see above                                                                                                                                                                                                                                                                                                                                                                                                                                                                                                                                                                                                                                                                                              | SYNLAB Jena Oncoscreen                                                                                                                | Robert Koch Institute | unknown |
| EPI_ISL_1142082, EPI_ISL_1142084,<br>EPI_ISL_1142086, EPI_ISL_1142088,<br>EPI_ISL_1142090, EPI_ISL_1142093                                                                                                                                                                                                                                                                                                                                                                                                                                                                                                                                                                                             | Uniklinikum Carl Gustav Carus an der TU Dresden; Institut für Virologie                                                               | Robert Koch Institute | unknown |
| EPI_ISL_1142103, EPI_ISL_1142104,<br>EPI_ISL_1142107, EPI_ISL_1142109,<br>EPI_ISL_1142147, EPI_ISL_1142155,<br>EPI_ISL_1142160, EPI_ISL_1142177                                                                                                                                                                                                                                                                                                                                                                                                                                                                                                                                                        | Limbach - MVZ Labor Dr. Volkmann & Kollegen                                                                                           | Robert Koch Institute | unknown |
| EPI_ISL_1142253                                                                                                                                                                                                                                                                                                                                                                                                                                                                                                                                                                                                                                                                                        | Diagnosticum - Labor Neukirchen                                                                                                       | Robert Koch Institute | unknown |
| EPI_ISL_1142259, EPI_ISL_1142264,<br>EPI_ISL_1142268, EPI_ISL_1142269,<br>EPI_ISL_1142271, EPI_ISL_1142273                                                                                                                                                                                                                                                                                                                                                                                                                                                                                                                                                                                             | MVZ Dr. Eberhard & Partner Dortmund                                                                                                   | Robert Koch Institute | unknown |
| EPI_ISL_1142275                                                                                                                                                                                                                                                                                                                                                                                                                                                                                                                                                                                                                                                                                        | LabKom - Labor an der Salzbrücke MVZ GmbH                                                                                             | Robert Koch Institute | unknown |
| EPI_ISL_1142276                                                                                                                                                                                                                                                                                                                                                                                                                                                                                                                                                                                                                                                                                        | Sonic - MVZ Medizinisches Labor Bremen GmbH                                                                                           | Robert Koch Institute | unknown |
| EPI_ISL_1142279, EPI_ISL_1142282                                                                                                                                                                                                                                                                                                                                                                                                                                                                                                                                                                                                                                                                       | Bioscientia Labor Wermsdorf                                                                                                           | Robert Koch Institute | unknown |
| EPI_ISL_1142283                                                                                                                                                                                                                                                                                                                                                                                                                                                                                                                                                                                                                                                                                        | Sonic - MVZ Medizinisches Labor Bremen GmbH                                                                                           | Robert Koch Institute | unknown |
| EPI_ISL_1142285, EPI_ISL_1142286,<br>EPI_ISL_1142287                                                                                                                                                                                                                                                                                                                                                                                                                                                                                                                                                                                                                                                   | LabKom - Labor Augsburg MVZ GmbH                                                                                                      | Robert Koch Institute | unknown |
| EPI_ISL_1142288                                                                                                                                                                                                                                                                                                                                                                                                                                                                                                                                                                                                                                                                                        | LabKom - Labor an der Salzbrücke MVZ GmbH                                                                                             | Robert Koch Institute | unknown |
| EPI_ISL_1142290, EPI_ISL_1142296,<br>EPI_ISL_1142301                                                                                                                                                                                                                                                                                                                                                                                                                                                                                                                                                                                                                                                   | Sonic - MVZ Medizinisches Labor Bremen GmbH                                                                                           | Robert Koch Institute | unknown |
| EPI_ISL_1142308                                                                                                                                                                                                                                                                                                                                                                                                                                                                                                                                                                                                                                                                                        | Bioscientia MVZ Labor Karlsruhe GmbH                                                                                                  | Robert Koch Institute | unknown |

|                                                   |                                             |                       |         |
|---------------------------------------------------|---------------------------------------------|-----------------------|---------|
| EPI_ISL_1142311                                   | LabKom - Labor Augsburg MVZ GmbH            | Robert Koch Institute | unknown |
| EPI_ISL_1142312                                   | LabKom - Labor Hannover MVZ GmbH            | Robert Koch Institute | unknown |
| EPI_ISL_1142317                                   | LabKom - Labor Mainz MVZ GmbH               | Robert Koch Institute | unknown |
| EPI_ISL_1142318, EPI_ISL_1142322                  | Sonic - MVZ Medizinisches Labor Bremen GmbH | Robert Koch Institute | unknown |
| EPI_ISL_1142329                                   | Bioscientia MVZ Labor Karlsruhe GmbH        | Robert Koch Institute | unknown |
| EPI_ISL_1142332                                   | LabKom - Labor Hamburg-Lübeck               | Robert Koch Institute | unknown |
| EPI_ISL_1142333                                   | LabKom - Labor an der Salzbrücke MVZ GmbH   | Robert Koch Institute | unknown |
| EPI_ISL_1142338                                   | Sonic - MVZ Medizinisches Labor Bremen GmbH | Robert Koch Institute | unknown |
| EPI_ISL_1142341                                   | LabKom - Labor Augsburg MVZ GmbH            | Robert Koch Institute | unknown |
| EPI_ISL_1142345                                   | Sonic - MVZ Medizinisches Labor Bremen GmbH | Robert Koch Institute | unknown |
| EPI_ISL_1142346                                   | LabKom - Labor Augsburg MVZ GmbH            | Robert Koch Institute | unknown |
| EPI_ISL_1142349                                   | LabKom - Labor an der Salzbrücke MVZ GmbH   | Robert Koch Institute | unknown |
| EPI_ISL_1142354                                   | Bioscientia Labor Wermsdorf                 | Robert Koch Institute | unknown |
| EPI_ISL_1142355                                   | Bioscientia MVZ Labor Karlsruhe GmbH        | Robert Koch Institute | unknown |
| EPI_ISL_1142358                                   | Sonic - MVZ Medizinisches Labor Bremen GmbH | Robert Koch Institute | unknown |
| EPI_ISL_1142359                                   | LabKom - Labor an der Salzbrücke MVZ GmbH   | Robert Koch Institute | unknown |
| EPI_ISL_1142360                                   | Bioscientia Labor Wermsdorf                 | Robert Koch Institute | unknown |
| EPI_ISL_1142361                                   | LabKom - Labor Mainz MVZ GmbH               | Robert Koch Institute | unknown |
| EPI_ISL_1142363                                   | LabKom - Labor Augsburg MVZ GmbH            | Robert Koch Institute | unknown |
| EPI_ISL_1142365                                   | Sonic - MVZ Medizinisches Labor Bremen GmbH | Robert Koch Institute | unknown |
| EPI_ISL_1142367                                   | LabKom - Labor Mainz MVZ GmbH               | Robert Koch Institute | unknown |
| EPI_ISL_1142368                                   | Sonic - MVZ Medizinisches Labor Bremen GmbH | Robert Koch Institute | unknown |
| EPI_ISL_1142369                                   | Bioscientia MVZ Labor Karlsruhe GmbH        | Robert Koch Institute | unknown |
| EPI_ISL_1142375                                   | Sonic - MVZ Medizinisches Labor Bremen GmbH | Robert Koch Institute | unknown |
| EPI_ISL_1142376                                   | LabKom - Labor Mainz MVZ GmbH               | Robert Koch Institute | unknown |
| EPI_ISL_1142382                                   | Sonic - MVZ Medizinisches Labor Bremen GmbH | Robert Koch Institute | unknown |
| EPI_ISL_1142386                                   | Bioscientia Labor Wermsdorf                 | Robert Koch Institute | unknown |
| EPI_ISL_1142389                                   | LabKom - Labor Mainz MVZ GmbH               | Robert Koch Institute | unknown |
| EPI_ISL_1142391, EPI_ISL_1142401                  | LabKom - Labor Augsburg MVZ GmbH            | Robert Koch Institute | unknown |
| EPI_ISL_1142413, EPI_ISL_1142414                  | Sonic - MVZ Medizinisches Labor Bremen GmbH | Robert Koch Institute | unknown |
| EPI_ISL_1142415                                   | LabKom - Labor Mainz MVZ GmbH               | Robert Koch Institute | unknown |
| EPI_ISL_1142417, EPI_ISL_1142422                  | LabKom - Labor an der Salzbrücke MVZ GmbH   | Robert Koch Institute | unknown |
| EPI_ISL_1142424                                   | LabKom - Labor Mainz MVZ GmbH               | Robert Koch Institute | unknown |
| EPI_ISL_1142426, EPI_ISL_1142427                  | LabKom - Labor Augsburg MVZ GmbH            | Robert Koch Institute | unknown |
| EPI_ISL_1142428                                   | Bioscientia MVZ Labor Karlsruhe GmbH        | Robert Koch Institute | unknown |
| EPI_ISL_1142439                                   | LabKom - Labor Augsburg MVZ GmbH            | Robert Koch Institute | unknown |
| EPI_ISL_1142445                                   | Bioscientia Labor Wermsdorf                 | Robert Koch Institute | unknown |
| EPI_ISL_1142452                                   | Bioscientia MVZ Labor Karlsruhe GmbH        | Robert Koch Institute | unknown |
| EPI_ISL_1142455                                   | LabKom - Labor Augsburg MVZ GmbH            | Robert Koch Institute | unknown |
| EPI_ISL_1142456, EPI_ISL_1142457, EPI_ISL_1142458 | Sonic - MVZ Medizinisches Labor Bremen GmbH | Robert Koch Institute | unknown |
| EPI_ISL_1142459, EPI_ISL_1142461                  | Bioscientia Labor Wermsdorf                 | Robert Koch Institute | unknown |
| EPI_ISL_1142468                                   | Sonic - MVZ Medizinisches Labor Bremen GmbH | Robert Koch Institute | unknown |
| EPI_ISL_1142469                                   | Bioscientia Labor Wermsdorf                 | Robert Koch Institute | unknown |
| EPI_ISL_1142470                                   | LabKom - Labor Augsburg MVZ GmbH            | Robert Koch Institute | unknown |
| EPI_ISL_1142473                                   | LabKom - Labor Mainz MVZ GmbH               | Robert Koch Institute | unknown |
| EPI_ISL_1142476                                   | Bioscientia Labor Wermsdorf                 | Robert Koch Institute | unknown |
| EPI_ISL_1142479                                   | LabKom - Labor Augsburg MVZ GmbH            | Robert Koch Institute | unknown |
| EPI_ISL_1142480                                   | Sonic - MVZ Medizinisches Labor Bremen GmbH | Robert Koch Institute | unknown |
| EPI_ISL_1142482                                   | LabKom - Labor Augsburg MVZ GmbH            | Robert Koch Institute | unknown |
| EPI_ISL_1142484, EPI_ISL_1142486                  | Sonic - MVZ Medizinisches Labor Bremen GmbH | Robert Koch Institute | unknown |
| EPI_ISL_1142490                                   | LabKom - Labor Hamburg-Lübeck               | Robert Koch Institute | unknown |
| EPI_ISL_1142495                                   | Sonic - MVZ Medizinisches Labor Bremen GmbH | Robert Koch Institute | unknown |
| EPI_ISL_1142496                                   | Bioscientia Labor Wermsdorf                 | Robert Koch Institute | unknown |
| EPI_ISL_1142501                                   | LabKom - Labor Mainz MVZ GmbH               | Robert Koch Institute | unknown |
| EPI_ISL_1142503                                   | Sonic - MVZ Medizinisches Labor Bremen GmbH | Robert Koch Institute | unknown |
| EPI_ISL_1142505                                   | Bioscientia Labor Wermsdorf                 | Robert Koch Institute | unknown |
| EPI_ISL_1142506                                   | Sonic - MVZ Medizinisches Labor Bremen GmbH | Robert Koch Institute | unknown |
| EPI_ISL_1142509                                   | Bioscientia Labor Wermsdorf                 | Robert Koch Institute | unknown |

|                                                                                                                                                                                      |                                                    |                       |         |
|--------------------------------------------------------------------------------------------------------------------------------------------------------------------------------------|----------------------------------------------------|-----------------------|---------|
| EPI_ISL_1142510                                                                                                                                                                      | LabKom - Labor Augsburg MVZ GmbH                   | Robert Koch Institute | unknown |
| EPI_ISL_1142511                                                                                                                                                                      | Sonic - MVZ Medizinisches Labor Bremen GmbH        | Robert Koch Institute | unknown |
| EPI_ISL_1142514                                                                                                                                                                      | Bioscientia MVZ Labor Karlsruhe GmbH               | Robert Koch Institute | unknown |
| EPI_ISL_1142518                                                                                                                                                                      | LabKom - Labor Hannover MVZ GmbH                   | Robert Koch Institute | unknown |
| EPI_ISL_1142522                                                                                                                                                                      | Sonic - MVZ Medizinisches Labor Bremen GmbH        | Robert Koch Institute | unknown |
| EPI_ISL_1142527, EPI_ISL_1142528,<br>EPI_ISL_1142536, EPI_ISL_1142537,<br>EPI_ISL_1142540, EPI_ISL_1142541,<br>EPI_ISL_1142559                                                       | Med. Labor Prof. Schenk Dr. Ansorge & Kollegen     | Robert Koch Institute | unknown |
| EPI_ISL_1142566, EPI_ISL_1142567,<br>EPI_ISL_1142568, EPI_ISL_1142571,<br>EPI_ISL_1142572, EPI_ISL_1142574,<br>EPI_ISL_1142576, EPI_ISL_1142577,<br>EPI_ISL_1142578, EPI_ISL_1142579 | Uniklinikum Regensburg; Institut für Mikrobiologie | Robert Koch Institute | unknown |
| EPI_ISL_1142723, EPI_ISL_1142726,<br>EPI_ISL_1142727                                                                                                                                 | Bioscientia Labor Wermsdorf                        | Robert Koch Institute | unknown |
| EPI_ISL_1142728, EPI_ISL_1142729,<br>EPI_ISL_1142743                                                                                                                                 | Sonic - MVZ Medizinisches Labor Bremen GmbH        | Robert Koch Institute | unknown |
| EPI_ISL_1142745, EPI_ISL_1142751                                                                                                                                                     | LabKom - MVZ Labor Bochum MLB GmbH                 | Robert Koch Institute | unknown |
| EPI_ISL_1142752, EPI_ISL_1142764                                                                                                                                                     | Sonic - MVZ Medizinisches Labor Bremen GmbH        | Robert Koch Institute | unknown |
| EPI_ISL_1142774                                                                                                                                                                      | Bioscientia Labor Wermsdorf                        | Robert Koch Institute | unknown |
| EPI_ISL_1142778                                                                                                                                                                      | Sonic - MVZ Medizinisches Labor Bremen GmbH        | Robert Koch Institute | unknown |
| EPI_ISL_1142781                                                                                                                                                                      | LabKom - Labor an der Salzbrücke MVZ GmbH          | Robert Koch Institute | unknown |
| EPI_ISL_1142793                                                                                                                                                                      | Sonic - MVZ Medizinisches Labor Bremen GmbH        | Robert Koch Institute | unknown |
| EPI_ISL_1142794, EPI_ISL_1142797                                                                                                                                                     | Bioscientia Labor Wermsdorf                        | Robert Koch Institute | unknown |
| EPI_ISL_1142800, EPI_ISL_1142801                                                                                                                                                     | Sonic - MVZ Medizinisches Labor Bremen GmbH        | Robert Koch Institute | unknown |
| EPI_ISL_1142805, EPI_ISL_1142809,<br>EPI_ISL_1142814                                                                                                                                 | LabKom - MVZ Labor Bochum MLB GmbH                 | Robert Koch Institute | unknown |
| EPI_ISL_1142816                                                                                                                                                                      | Bioscientia Labor Wermsdorf                        | Robert Koch Institute | unknown |
| EPI_ISL_1142823                                                                                                                                                                      | LabKom - MVZ Labor Bochum MLB GmbH                 | Robert Koch Institute | unknown |
| EPI_ISL_1142825                                                                                                                                                                      | Sonic - MVZ Medizinisches Labor Bremen GmbH        | Robert Koch Institute | unknown |
| EPI_ISL_1142831                                                                                                                                                                      | Bioscientia Labor Wermsdorf                        | Robert Koch Institute | unknown |
| EPI_ISL_1142832                                                                                                                                                                      | LabKom - MVZ Labor Bochum MLB GmbH                 | Robert Koch Institute | unknown |
| EPI_ISL_1142834                                                                                                                                                                      | Sonic - MVZ Medizinisches Labor Bremen GmbH        | Robert Koch Institute | unknown |
| EPI_ISL_1142835                                                                                                                                                                      | Bioscientia Labor Wermsdorf                        | Robert Koch Institute | unknown |
| EPI_ISL_1142838                                                                                                                                                                      | LabKom - Labor Mainz MVZ GmbH                      | Robert Koch Institute | unknown |
| EPI_ISL_1142840                                                                                                                                                                      | Sonic - MVZ Medizinisches Labor Bremen GmbH        | Robert Koch Institute | unknown |
| EPI_ISL_1142846, EPI_ISL_1142850                                                                                                                                                     | LabKom - MVZ Labor Bochum MLB GmbH                 | Robert Koch Institute | unknown |
| EPI_ISL_1142851                                                                                                                                                                      | Sonic - MVZ Medizinisches Labor Bremen GmbH        | Robert Koch Institute | unknown |
| EPI_ISL_1142852                                                                                                                                                                      | LabKom - MVZ Labor Bochum MLB GmbH                 | Robert Koch Institute | unknown |
| EPI_ISL_1142853, EPI_ISL_1142854                                                                                                                                                     | Sonic - MVZ Medizinisches Labor Bremen GmbH        | Robert Koch Institute | unknown |
| EPI_ISL_1142855                                                                                                                                                                      | LabKom - MVZ Labor Bochum MLB GmbH                 | Robert Koch Institute | unknown |
| EPI_ISL_1142857                                                                                                                                                                      | Bioscientia Labor Wermsdorf                        | Robert Koch Institute | unknown |
| EPI_ISL_1142859, EPI_ISL_1142867                                                                                                                                                     | Sonic - MVZ Medizinisches Labor Bremen GmbH        | Robert Koch Institute | unknown |
| EPI_ISL_1142870                                                                                                                                                                      | LabKom - MVZ Labor Bochum MLB GmbH                 | Robert Koch Institute | unknown |
| EPI_ISL_1142880, EPI_ISL_1142885,<br>EPI_ISL_1142887                                                                                                                                 | Sonic - MVZ Medizinisches Labor Bremen GmbH        | Robert Koch Institute | unknown |
| EPI_ISL_1142892                                                                                                                                                                      | LabKom - MVZ Labor Bochum MLB GmbH                 | Robert Koch Institute | unknown |
| EPI_ISL_1142900                                                                                                                                                                      | Sonic - MVZ Medizinisches Labor Bremen GmbH        | Robert Koch Institute | unknown |
| EPI_ISL_1142905                                                                                                                                                                      | Bioscientia Labor Wermsdorf                        | Robert Koch Institute | unknown |
| EPI_ISL_1142906                                                                                                                                                                      | Sonic - MVZ Medizinisches Labor Bremen GmbH        | Robert Koch Institute | unknown |
| EPI_ISL_1142908                                                                                                                                                                      | LabKom - MVZ Labor Bochum MLB GmbH                 | Robert Koch Institute | unknown |
| EPI_ISL_1142911, EPI_ISL_1142913                                                                                                                                                     | Sonic - MVZ Medizinisches Labor Bremen GmbH        | Robert Koch Institute | unknown |
| EPI_ISL_1142918                                                                                                                                                                      | LabKom - MVZ Labor Bochum MLB GmbH                 | Robert Koch Institute | unknown |
| EPI_ISL_1142919, EPI_ISL_1142922                                                                                                                                                     | Sonic - MVZ Medizinisches Labor Bremen GmbH        | Robert Koch Institute | unknown |
| EPI_ISL_1142923                                                                                                                                                                      | Bioscientia Labor Wermsdorf                        | Robert Koch Institute | unknown |
| EPI_ISL_1142926, EPI_ISL_1142933                                                                                                                                                     | Sonic - MVZ Medizinisches Labor Bremen GmbH        | Robert Koch Institute | unknown |
| EPI_ISL_1142936                                                                                                                                                                      | Bioscientia Labor Wermsdorf                        | Robert Koch Institute | unknown |
| EPI_ISL_1142937                                                                                                                                                                      | Sonic - MVZ Medizinisches Labor Bremen GmbH        | Robert Koch Institute | unknown |
| EPI_ISL_1142938                                                                                                                                                                      | Bioscientia Labor Wermsdorf                        | Robert Koch Institute | unknown |
| EPI_ISL_1142950                                                                                                                                                                      | LabKom - Labor Augsburg MVZ GmbH                   | Robert Koch Institute | unknown |
| EPI_ISL_1142951                                                                                                                                                                      | Sonic - MVZ Medizinisches Labor Bremen GmbH        | Robert Koch Institute | unknown |

|                                                                    |                                                      |                       |         |
|--------------------------------------------------------------------|------------------------------------------------------|-----------------------|---------|
| EPI_ISL_1142954                                                    | LabKom - Labor an der Salzbrücke MVZ GmbH            | Robert Koch Institute | unknown |
| EPI_ISL_1142960                                                    | LabKom - MVZ Labor Bochum MLB GmbH                   | Robert Koch Institute | unknown |
| EPI_ISL_1142964                                                    | Sonic - MVZ Medizinisches Labor Bremen GmbH          | Robert Koch Institute | unknown |
| EPI_ISL_1142969                                                    | LabKom - MVZ Labor Bochum MLB GmbH                   | Robert Koch Institute | unknown |
| EPI_ISL_1142977, EPI_ISL_1142990, EPI_ISL_1142995, EPI_ISL_1143006 | Sonic - MVZ Medizinisches Labor Bremen GmbH          | Robert Koch Institute | unknown |
| EPI_ISL_1143021                                                    | LabKom - MVZ Labor Bochum MLB GmbH                   | Robert Koch Institute | unknown |
| EPI_ISL_1143022, EPI_ISL_1143032                                   | LabKom - Labor Hannover MVZ GmbH                     | Robert Koch Institute | unknown |
| EPI_ISL_1143041                                                    | Labor 28 MVZ GmbH                                    | Robert Koch Institute | unknown |
| EPI_ISL_1143045                                                    | Bioscientia MVZ Labor Karlsruhe GmbH                 | Robert Koch Institute | unknown |
| EPI_ISL_1143054                                                    | Bioscientia Labor Wermsdorf                          | Robert Koch Institute | unknown |
| EPI_ISL_1143056                                                    | Sonic - Labor Dr. von Foreich GmbH                   | Robert Koch Institute | unknown |
| EPI_ISL_1143060                                                    | Bioscientia MVZ Labor Karlsruhe GmbH                 | Robert Koch Institute | unknown |
| EPI_ISL_1143064, EPI_ISL_1143065                                   | Bioscientia Labor Wermsdorf                          | Robert Koch Institute | unknown |
| EPI_ISL_1143066                                                    | LabKom - MVZ Labor Bochum MLB GmbH                   | Robert Koch Institute | unknown |
| EPI_ISL_1143069, EPI_ISL_1143070                                   | Bioscientia Labor Wermsdorf                          | Robert Koch Institute | unknown |
| EPI_ISL_1143072                                                    | Sonic - Labor Dr. von Foreich GmbH                   | Robert Koch Institute | unknown |
| EPI_ISL_1143073, EPI_ISL_1143074, EPI_ISL_1143075, EPI_ISL_1143076 | Bioscientia Labor Wermsdorf                          | Robert Koch Institute | unknown |
| EPI_ISL_1143084                                                    | LabKom - Labor Hamburg-Lübeck                        | Robert Koch Institute | unknown |
| EPI_ISL_1143086                                                    | Bioscientia Labor Wermsdorf                          | Robert Koch Institute | unknown |
| EPI_ISL_1143092                                                    | Labor 28 MVZ GmbH                                    | Robert Koch Institute | unknown |
| EPI_ISL_1143095, EPI_ISL_1143108, EPI_ISL_1143112                  | Bioscientia Labor Wermsdorf                          | Robert Koch Institute | unknown |
| EPI_ISL_1143118                                                    | Sonic - MVZ Medizinisches Labor Bremen GmbH          | Robert Koch Institute | unknown |
| EPI_ISL_1143121                                                    | Sonic - Bioscientia - MVZ Labor Saar GmbH            | Robert Koch Institute | unknown |
| EPI_ISL_1143123                                                    | Labor 28 MVZ GmbH                                    | Robert Koch Institute | unknown |
| EPI_ISL_1143125                                                    | Bioscientia MVZ Labor Karlsruhe GmbH                 | Robert Koch Institute | unknown |
| EPI_ISL_1143138                                                    | Sonic - Bioscientia - MVZ Labor Saar GmbH            | Robert Koch Institute | unknown |
| EPI_ISL_1143139, EPI_ISL_1143142, EPI_ISL_1143156                  | Bioscientia Labor Wermsdorf                          | Robert Koch Institute | unknown |
| EPI_ISL_1143161                                                    | Sonic - MVZ Medizinisches Labor Bremen GmbH          | Robert Koch Institute | unknown |
| EPI_ISL_1143164, EPI_ISL_1143167                                   | LabKom - Labor Mainz MVZ GmbH                        | Robert Koch Institute | unknown |
| EPI_ISL_1143185                                                    | Bioscientia MVZ Labor Karlsruhe GmbH                 | Robert Koch Institute | unknown |
| EPI_ISL_1143187                                                    | LabKom - Labor Mainz MVZ GmbH                        | Robert Koch Institute | unknown |
| EPI_ISL_1143189                                                    | Sonic - Bioscientia - MVZ Labor Saar GmbH            | Robert Koch Institute | unknown |
| EPI_ISL_1143196, EPI_ISL_1143203                                   | Bioscientia Labor Wermsdorf                          | Robert Koch Institute | unknown |
| EPI_ISL_1143204                                                    | Sonic - Labor Staber Bayreuth                        | Robert Koch Institute | unknown |
| EPI_ISL_1143205                                                    | Bioscientia Labor Wermsdorf                          | Robert Koch Institute | unknown |
| EPI_ISL_1143206                                                    | Sonic - MVZ Medizinisches Labor Bremen GmbH          | Robert Koch Institute | unknown |
| EPI_ISL_1143221                                                    | LabKom - Labor Mainz MVZ GmbH                        | Robert Koch Institute | unknown |
| EPI_ISL_1143222                                                    | Bioscientia Labor Wermsdorf                          | Robert Koch Institute | unknown |
| EPI_ISL_1143223                                                    | LabKom - Labor Mainz MVZ GmbH                        | Robert Koch Institute | unknown |
| EPI_ISL_1143229                                                    | Bioscientia Labor Wermsdorf                          | Robert Koch Institute | unknown |
| EPI_ISL_1143232                                                    | Labor 28 MVZ GmbH                                    | Robert Koch Institute | unknown |
| EPI_ISL_1143236                                                    | Bioscientia Labor Wermsdorf                          | Robert Koch Institute | unknown |
| EPI_ISL_1143240                                                    | Sonic - Labor Dr. von Foreich GmbH                   | Robert Koch Institute | unknown |
| EPI_ISL_1143247                                                    | LabKom - MVZ Labor Bochum MLB GmbH                   | Robert Koch Institute | unknown |
| EPI_ISL_1143249, EPI_ISL_1143256, EPI_ISL_1143261                  | Bioscientia Labor Wermsdorf                          | Robert Koch Institute | unknown |
| EPI_ISL_1143270                                                    | LabKom - MVZ Labor Bochum MLB GmbH                   | Robert Koch Institute | unknown |
| EPI_ISL_1143280                                                    | Sonic - Bioscientia - MVZ Labor Saar GmbH            | Robert Koch Institute | unknown |
| EPI_ISL_1143281                                                    | Labor 28 MVZ GmbH                                    | Robert Koch Institute | unknown |
| EPI_ISL_1143282                                                    | Sonic - Labor Staber Bayreuth                        | Robert Koch Institute | unknown |
| EPI_ISL_1143289                                                    | LabKom - Labor Mainz MVZ GmbH                        | Robert Koch Institute | unknown |
| EPI_ISL_1143292, EPI_ISL_1143295                                   | Bioscientia Labor Wermsdorf                          | Robert Koch Institute | unknown |
| EPI_ISL_1143299                                                    | Sonic - Labor Staber Bayreuth                        | Robert Koch Institute | unknown |
| EPI_ISL_1143444                                                    | MVZ Labor Dr. Fenner und Kollegen (Standort Hamburg) | Robert Koch Institute | unknown |
| EPI_ISL_1143448                                                    | IMD - MVZ Labor Greifswald                           | Robert Koch Institute | unknown |

EPI\_ISL\_1143449, EPI\_ISL\_1143450, EPI\_ISL\_1143451, EPI\_ISL\_1143452, EPI\_ISL\_1143453, EPI\_ISL\_1143454, EPI\_ISL\_1143456, EPI\_ISL\_1143457, EPI\_ISL\_1143458, EPI\_ISL\_1143459, EPI\_ISL\_1143460, EPI\_ISL\_1143462, EPI\_ISL\_1143464, EPI\_ISL\_1143465, EPI\_ISL\_1143466, EPI\_ISL\_1143467, EPI\_ISL\_1143469

|                                                                                                                                                                                                                                                                                                                                                                                                                                                                                                                                                                                 |                                                                                                                                       |                       |         |
|---------------------------------------------------------------------------------------------------------------------------------------------------------------------------------------------------------------------------------------------------------------------------------------------------------------------------------------------------------------------------------------------------------------------------------------------------------------------------------------------------------------------------------------------------------------------------------|---------------------------------------------------------------------------------------------------------------------------------------|-----------------------|---------|
| see above                                                                                                                                                                                                                                                                                                                                                                                                                                                                                                                                                                       | IMD - Labor Oderland                                                                                                                  | Robert Koch Institute | unknown |
| EPI_ISL_1143471                                                                                                                                                                                                                                                                                                                                                                                                                                                                                                                                                                 | IMD - Institut für Medizinische Diagnostik Berlin-Potsdam                                                                             | Robert Koch Institute | unknown |
| EPI_ISL_1143472, EPI_ISL_1143474, EPI_ISL_1143476, EPI_ISL_1143477, EPI_ISL_1143478, EPI_ISL_1143480, EPI_ISL_1143482, EPI_ISL_1143483, EPI_ISL_1143484, EPI_ISL_1143486, EPI_ISL_1143487                                                                                                                                                                                                                                                                                                                                                                                       |                                                                                                                                       |                       |         |
| see above                                                                                                                                                                                                                                                                                                                                                                                                                                                                                                                                                                       | IMD - Labor Oderland                                                                                                                  | Robert Koch Institute | unknown |
| EPI_ISL_1143488, EPI_ISL_1143489                                                                                                                                                                                                                                                                                                                                                                                                                                                                                                                                                | IMD - MVZ Labor Greifswald                                                                                                            | Robert Koch Institute | unknown |
| EPI_ISL_1143490                                                                                                                                                                                                                                                                                                                                                                                                                                                                                                                                                                 | IMD - Institut für Medizinische Diagnostik Berlin-Potsdam                                                                             | Robert Koch Institute | unknown |
| EPI_ISL_1143491, EPI_ISL_1143492, EPI_ISL_1143494, EPI_ISL_1143495, EPI_ISL_1143496, EPI_ISL_1143497, EPI_ISL_1143498, EPI_ISL_1143499, EPI_ISL_1143500, EPI_ISL_1143502, EPI_ISL_1143504, EPI_ISL_1143505, EPI_ISL_1143507, EPI_ISL_1143508, EPI_ISL_1143509, EPI_ISL_1143510, EPI_ISL_1143511, EPI_ISL_1143512, EPI_ISL_1143513, EPI_ISL_1143514, EPI_ISL_1143515, EPI_ISL_1143517                                                                                                                                                                                            |                                                                                                                                       |                       |         |
| see above                                                                                                                                                                                                                                                                                                                                                                                                                                                                                                                                                                       | IMD - MVZ Labor Greifswald                                                                                                            | Robert Koch Institute | unknown |
| EPI_ISL_1143518                                                                                                                                                                                                                                                                                                                                                                                                                                                                                                                                                                 | IMD - Labor Oderland                                                                                                                  | Robert Koch Institute | unknown |
| EPI_ISL_1143519, EPI_ISL_1143520, EPI_ISL_1143521                                                                                                                                                                                                                                                                                                                                                                                                                                                                                                                               | IMD - MVZ Labor Greifswald                                                                                                            | Robert Koch Institute | unknown |
| EPI_ISL_1143522                                                                                                                                                                                                                                                                                                                                                                                                                                                                                                                                                                 | IMD - Labor Oderland                                                                                                                  | Robert Koch Institute | unknown |
| EPI_ISL_1143523, EPI_ISL_1143524                                                                                                                                                                                                                                                                                                                                                                                                                                                                                                                                                | IMD - MVZ Labor Greifswald                                                                                                            | Robert Koch Institute | unknown |
| EPI_ISL_1143525, EPI_ISL_1143527                                                                                                                                                                                                                                                                                                                                                                                                                                                                                                                                                | IMD - Labor Oderland                                                                                                                  | Robert Koch Institute | unknown |
| EPI_ISL_1143528, EPI_ISL_1143529, EPI_ISL_1143530, EPI_ISL_1143531                                                                                                                                                                                                                                                                                                                                                                                                                                                                                                              | IMD - MVZ Labor Greifswald                                                                                                            | Robert Koch Institute | unknown |
| EPI_ISL_1143532                                                                                                                                                                                                                                                                                                                                                                                                                                                                                                                                                                 | IMD - Labor Oderland                                                                                                                  | Robert Koch Institute | unknown |
| EPI_ISL_1143533, EPI_ISL_1143534, EPI_ISL_1143535, EPI_ISL_1143536, EPI_ISL_1143537                                                                                                                                                                                                                                                                                                                                                                                                                                                                                             | IMD - Institut für Medizinische Diagnostik Berlin-Potsdam                                                                             | Robert Koch Institute | unknown |
| EPI_ISL_1143538                                                                                                                                                                                                                                                                                                                                                                                                                                                                                                                                                                 | IMD - Medizinisches Labor Rostock                                                                                                     | Robert Koch Institute | unknown |
| EPI_ISL_1143539                                                                                                                                                                                                                                                                                                                                                                                                                                                                                                                                                                 | IMD - Institut für Medizinische Diagnostik Berlin-Potsdam                                                                             | Robert Koch Institute | unknown |
| EPI_ISL_1143540, EPI_ISL_1143541                                                                                                                                                                                                                                                                                                                                                                                                                                                                                                                                                | IMD - Medizinisches Labor Rostock                                                                                                     | Robert Koch Institute | unknown |
| EPI_ISL_1143542, EPI_ISL_1143543                                                                                                                                                                                                                                                                                                                                                                                                                                                                                                                                                | IMD - MVZ Labor Greifswald                                                                                                            | Robert Koch Institute | unknown |
| EPI_ISL_1143545                                                                                                                                                                                                                                                                                                                                                                                                                                                                                                                                                                 | IMD - Medizinisches Labor Rostock                                                                                                     | Robert Koch Institute | unknown |
| EPI_ISL_1143546, EPI_ISL_1143547, EPI_ISL_1143548, EPI_ISL_1143549, EPI_ISL_1143550                                                                                                                                                                                                                                                                                                                                                                                                                                                                                             | IMD - Institut für Medizinische Diagnostik Berlin-Potsdam                                                                             | Robert Koch Institute | unknown |
| EPI_ISL_1143551                                                                                                                                                                                                                                                                                                                                                                                                                                                                                                                                                                 | IMD - Labor Oderland                                                                                                                  | Robert Koch Institute | unknown |
| EPI_ISL_1143552                                                                                                                                                                                                                                                                                                                                                                                                                                                                                                                                                                 | IMD - MVZ Labor Greifswald                                                                                                            | Robert Koch Institute | unknown |
| EPI_ISL_1143553                                                                                                                                                                                                                                                                                                                                                                                                                                                                                                                                                                 | IMD - Institut für Medizinische Diagnostik Berlin-Potsdam                                                                             | Robert Koch Institute | unknown |
| EPI_ISL_1143554                                                                                                                                                                                                                                                                                                                                                                                                                                                                                                                                                                 | IMD - Medizinisches Labor Rostock                                                                                                     | Robert Koch Institute | unknown |
| EPI_ISL_1143743                                                                                                                                                                                                                                                                                                                                                                                                                                                                                                                                                                 | Bayerisches Landesamt für Gesundheit und Lebensmittelsicherheit (LGL)                                                                 | Robert Koch Institute | unknown |
| EPI_ISL_1143916, EPI_ISL_1143917, EPI_ISL_1143918                                                                                                                                                                                                                                                                                                                                                                                                                                                                                                                               | Uniklinikum Regensburg; Institut für Mikrobiologie                                                                                    | Robert Koch Institute | unknown |
| EPI_ISL_1143933, EPI_ISL_1143938                                                                                                                                                                                                                                                                                                                                                                                                                                                                                                                                                | Thüringer Landesamtes für Verbraucherschutz                                                                                           | Robert Koch Institute | unknown |
| EPI_ISL_1143951                                                                                                                                                                                                                                                                                                                                                                                                                                                                                                                                                                 | Bayerisches Landesamt für Gesundheit und Lebensmittelsicherheit (LGL)                                                                 | Robert Koch Institute | unknown |
| EPI_ISL_1144166                                                                                                                                                                                                                                                                                                                                                                                                                                                                                                                                                                 | Limbach - MVZ Humangenetik Ulm                                                                                                        | Robert Koch Institute | unknown |
| EPI_ISL_1144220                                                                                                                                                                                                                                                                                                                                                                                                                                                                                                                                                                 | MVZ Labor Dr. Limbach & Kollegen GbR                                                                                                  | Robert Koch Institute | unknown |
| EPI_ISL_1144228, EPI_ISL_1144229, EPI_ISL_1144231, EPI_ISL_1144233, EPI_ISL_1144235, EPI_ISL_1144237, EPI_ISL_1144239, EPI_ISL_1144242, EPI_ISL_1144244, EPI_ISL_1144245, EPI_ISL_1144247, EPI_ISL_1144248, EPI_ISL_1144249                                                                                                                                                                                                                                                                                                                                                     |                                                                                                                                       |                       |         |
| see above                                                                                                                                                                                                                                                                                                                                                                                                                                                                                                                                                                       | Dianovis GmbH Greiz                                                                                                                   | Robert Koch Institute | unknown |
| EPI_ISL_1144257, EPI_ISL_1144258, EPI_ISL_1144288                                                                                                                                                                                                                                                                                                                                                                                                                                                                                                                               | Limbach - MVZ Humangenetik Ulm                                                                                                        | Robert Koch Institute | unknown |
| EPI_ISL_1144306                                                                                                                                                                                                                                                                                                                                                                                                                                                                                                                                                                 | Labor Blackholm MVZ                                                                                                                   | Robert Koch Institute | unknown |
| EPI_ISL_1144358, EPI_ISL_1144359, EPI_ISL_1144360, EPI_ISL_1144361, EPI_ISL_1144362, EPI_ISL_1144389, EPI_ISL_1144393, EPI_ISL_1144394                                                                                                                                                                                                                                                                                                                                                                                                                                          | Limbach - MVZ Humangenetik Ulm                                                                                                        | Robert Koch Institute | unknown |
| EPI_ISL_1144395, EPI_ISL_1144399, EPI_ISL_1144401, EPI_ISL_1144402, EPI_ISL_1144405, EPI_ISL_1144408, EPI_ISL_1144409, EPI_ISL_1144410, EPI_ISL_1144411, EPI_ISL_1144413                                                                                                                                                                                                                                                                                                                                                                                                        | Universitätsklinikum Essen                                                                                                            | Robert Koch Institute | unknown |
| EPI_ISL_1144682, EPI_ISL_1144683, EPI_ISL_1144685, EPI_ISL_1144686, EPI_ISL_1144687, EPI_ISL_1144688, EPI_ISL_1144689, EPI_ISL_1144690, EPI_ISL_1144691, EPI_ISL_1144692, EPI_ISL_1144693, EPI_ISL_1144694, EPI_ISL_1144696, EPI_ISL_1144697, EPI_ISL_1144698, EPI_ISL_1144785, EPI_ISL_1144786, EPI_ISL_1144787, EPI_ISL_1144788, EPI_ISL_1144789, EPI_ISL_1144790, EPI_ISL_1144791, EPI_ISL_1144792, EPI_ISL_1144793, EPI_ISL_1144794, EPI_ISL_1144795, EPI_ISL_1144796, EPI_ISL_1144797, EPI_ISL_1144798, EPI_ISL_1144799, EPI_ISL_1144800, EPI_ISL_1144801, EPI_ISL_1144802 |                                                                                                                                       |                       |         |
| see above                                                                                                                                                                                                                                                                                                                                                                                                                                                                                                                                                                       | Limbach - MVZ Humangenetik Ulm                                                                                                        | Robert Koch Institute | unknown |
| EPI_ISL_1144804, EPI_ISL_1144805, EPI_ISL_1144808, EPI_ISL_1144809, EPI_ISL_1144810, EPI_ISL_1144811, EPI_ISL_1144813                                                                                                                                                                                                                                                                                                                                                                                                                                                           | Herz- und Diabeteszentrum NRW: Universitätsklinik der Ruhr-Universität Bochum --> Institut für Laboratoriums- und Transfusionsmedizin | Robert Koch Institute | unknown |
| EPI_ISL_1144817, EPI_ISL_1144818, EPI_ISL_1144890, EPI_ISL_1144891, EPI_ISL_1144892, EPI_ISL_1144894, EPI_ISL_1144895                                                                                                                                                                                                                                                                                                                                                                                                                                                           | Limbach - MVZ Humangenetik Ulm                                                                                                        | Robert Koch Institute | unknown |

|                                                                                                                                                                                                                                                                                                                                                                                                                                                                                                                                                                                                                                                                                                                                                                                                                                                                                                                                                                                                                                           |                                                                                                          |                                                       |                                                                                                                                                                       |
|-------------------------------------------------------------------------------------------------------------------------------------------------------------------------------------------------------------------------------------------------------------------------------------------------------------------------------------------------------------------------------------------------------------------------------------------------------------------------------------------------------------------------------------------------------------------------------------------------------------------------------------------------------------------------------------------------------------------------------------------------------------------------------------------------------------------------------------------------------------------------------------------------------------------------------------------------------------------------------------------------------------------------------------------|----------------------------------------------------------------------------------------------------------|-------------------------------------------------------|-----------------------------------------------------------------------------------------------------------------------------------------------------------------------|
| EPI_ISL_1144907, EPI_ISL_1144908, EPI_ISL_1144909, EPI_ISL_1144910, EPI_ISL_1144911, EPI_ISL_1144912                                                                                                                                                                                                                                                                                                                                                                                                                                                                                                                                                                                                                                                                                                                                                                                                                                                                                                                                      | Labor Dr. Heidrich & Kollegen MVZ GmbH Hamburg                                                           | Robert Koch Institute                                 | unknown                                                                                                                                                               |
| EPI_ISL_1144941, EPI_ISL_1144945, EPI_ISL_1144946, EPI_ISL_1144947, EPI_ISL_1144949, EPI_ISL_1144953, EPI_ISL_1144954                                                                                                                                                                                                                                                                                                                                                                                                                                                                                                                                                                                                                                                                                                                                                                                                                                                                                                                     | Medizinische Hochschule Hannover Institut für Virologie                                                  | Robert Koch Institute                                 | unknown                                                                                                                                                               |
| EPI_ISL_1145027, EPI_ISL_1145052, EPI_ISL_1145098, EPI_ISL_1145133, EPI_ISL_1145173, EPI_ISL_1145195                                                                                                                                                                                                                                                                                                                                                                                                                                                                                                                                                                                                                                                                                                                                                                                                                                                                                                                                      | Bioscientia Labor Wermsdorf                                                                              | Robert Koch Institute                                 | unknown                                                                                                                                                               |
| EPI_ISL_1145280                                                                                                                                                                                                                                                                                                                                                                                                                                                                                                                                                                                                                                                                                                                                                                                                                                                                                                                                                                                                                           | Philipps-Universität Marburg Fachbereich Medizin Institut für Virologie                                  | Robert Koch Institute                                 | unknown                                                                                                                                                               |
| EPI_ISL_1145433, EPI_ISL_1145446, EPI_ISL_1145447, EPI_ISL_1145456, EPI_ISL_1145461, EPI_ISL_1145464, EPI_ISL_1145468, EPI_ISL_1145472, EPI_ISL_1145476, EPI_ISL_1145477, EPI_ISL_1145480, EPI_ISL_1145484, EPI_ISL_1145697                                                                                                                                                                                                                                                                                                                                                                                                                                                                                                                                                                                                                                                                                                                                                                                                               |                                                                                                          |                                                       |                                                                                                                                                                       |
| see above                                                                                                                                                                                                                                                                                                                                                                                                                                                                                                                                                                                                                                                                                                                                                                                                                                                                                                                                                                                                                                 | SYNLAB Jena Oncoscreen                                                                                   | Robert Koch Institute                                 | unknown                                                                                                                                                               |
| EPI_ISL_1145703                                                                                                                                                                                                                                                                                                                                                                                                                                                                                                                                                                                                                                                                                                                                                                                                                                                                                                                                                                                                                           | Praxisgemeinschaft für Laboratoriumsmedizin Labor Blumenstraße; Praxis Dr. Sel und Dr. Späte             | Robert Koch Institute                                 | unknown                                                                                                                                                               |
| EPI_ISL_1145711, EPI_ISL_1145712, EPI_ISL_1145720                                                                                                                                                                                                                                                                                                                                                                                                                                                                                                                                                                                                                                                                                                                                                                                                                                                                                                                                                                                         | SYNLAB Jena Oncoscreen                                                                                   | Robert Koch Institute                                 | unknown                                                                                                                                                               |
| EPI_ISL_1145721                                                                                                                                                                                                                                                                                                                                                                                                                                                                                                                                                                                                                                                                                                                                                                                                                                                                                                                                                                                                                           | Praxisgemeinschaft für Laboratoriumsmedizin Labor Blumenstraße; Praxis Dr. Sel und Dr. Späte             | Robert Koch Institute                                 | unknown                                                                                                                                                               |
| EPI_ISL_1145730, EPI_ISL_1145733, EPI_ISL_1145741, EPI_ISL_1145744, EPI_ISL_1145747, EPI_ISL_1145749, EPI_ISL_1145752, EPI_ISL_1145755, EPI_ISL_1145757, EPI_ISL_1145765, EPI_ISL_1145772, EPI_ISL_1145777, EPI_ISL_1145784, EPI_ISL_1145788, EPI_ISL_1145794, EPI_ISL_1145801, EPI_ISL_1145806                                                                                                                                                                                                                                                                                                                                                                                                                                                                                                                                                                                                                                                                                                                                           |                                                                                                          |                                                       |                                                                                                                                                                       |
| see above                                                                                                                                                                                                                                                                                                                                                                                                                                                                                                                                                                                                                                                                                                                                                                                                                                                                                                                                                                                                                                 | SYNLAB Jena Oncoscreen                                                                                   | Robert Koch Institute                                 | unknown                                                                                                                                                               |
| EPI_ISL_1145810                                                                                                                                                                                                                                                                                                                                                                                                                                                                                                                                                                                                                                                                                                                                                                                                                                                                                                                                                                                                                           | Medizinisches Zentrallabor Altenburg GmbH & Co.KG                                                        | Robert Koch Institute                                 | unknown                                                                                                                                                               |
| EPI_ISL_1145814, EPI_ISL_1145822                                                                                                                                                                                                                                                                                                                                                                                                                                                                                                                                                                                                                                                                                                                                                                                                                                                                                                                                                                                                          | SYNLAB Jena Oncoscreen                                                                                   | Robert Koch Institute                                 | unknown                                                                                                                                                               |
| EPI_ISL_1145825                                                                                                                                                                                                                                                                                                                                                                                                                                                                                                                                                                                                                                                                                                                                                                                                                                                                                                                                                                                                                           | Praxisgemeinschaft für Laboratoriumsmedizin Labor Blumenstraße; Praxis Dr. Sel und Dr. Späte             | Robert Koch Institute                                 | unknown                                                                                                                                                               |
| EPI_ISL_1145827, EPI_ISL_1145831, EPI_ISL_1145832, EPI_ISL_1145834, EPI_ISL_1145844, EPI_ISL_1145845, EPI_ISL_1145847, EPI_ISL_1145857                                                                                                                                                                                                                                                                                                                                                                                                                                                                                                                                                                                                                                                                                                                                                                                                                                                                                                    | SYNLAB Jena Oncoscreen                                                                                   | Robert Koch Institute                                 | unknown                                                                                                                                                               |
| EPI_ISL_1145859                                                                                                                                                                                                                                                                                                                                                                                                                                                                                                                                                                                                                                                                                                                                                                                                                                                                                                                                                                                                                           | Medizinisches Zentrallabor Altenburg GmbH & Co.KG                                                        | Robert Koch Institute                                 | unknown                                                                                                                                                               |
| EPI_ISL_1145866, EPI_ISL_1145867, EPI_ISL_1145875, EPI_ISL_1145880, EPI_ISL_1145881, EPI_ISL_1145882, EPI_ISL_1145885, EPI_ISL_1145893, EPI_ISL_1145895, EPI_ISL_1145900, EPI_ISL_1145901, EPI_ISL_1145903, EPI_ISL_1145905, EPI_ISL_1145908, EPI_ISL_1145909                                                                                                                                                                                                                                                                                                                                                                                                                                                                                                                                                                                                                                                                                                                                                                             |                                                                                                          |                                                       |                                                                                                                                                                       |
| see above                                                                                                                                                                                                                                                                                                                                                                                                                                                                                                                                                                                                                                                                                                                                                                                                                                                                                                                                                                                                                                 | SYNLAB Jena Oncoscreen                                                                                   | Robert Koch Institute                                 | unknown                                                                                                                                                               |
| EPI_ISL_1145980                                                                                                                                                                                                                                                                                                                                                                                                                                                                                                                                                                                                                                                                                                                                                                                                                                                                                                                                                                                                                           | Sonic - Labor Staber Dresden (Klipphausen)                                                               | Robert Koch Institute                                 | unknown                                                                                                                                                               |
| EPI_ISL_1146000                                                                                                                                                                                                                                                                                                                                                                                                                                                                                                                                                                                                                                                                                                                                                                                                                                                                                                                                                                                                                           | LabKom - Labor an der Salzbrücke MVZ GmbH                                                                | Robert Koch Institute                                 | unknown                                                                                                                                                               |
| EPI_ISL_1146800                                                                                                                                                                                                                                                                                                                                                                                                                                                                                                                                                                                                                                                                                                                                                                                                                                                                                                                                                                                                                           | Universitätsklinikum Leipzig - Institut für Medizinische Mikrobiologie und Virologie virologisches Labor | Robert Koch Institute                                 | unknown                                                                                                                                                               |
| EPI_ISL_1146985                                                                                                                                                                                                                                                                                                                                                                                                                                                                                                                                                                                                                                                                                                                                                                                                                                                                                                                                                                                                                           | Limbach - MVZ Humangenetik Ulm                                                                           | Robert Koch Institute                                 | unknown                                                                                                                                                               |
| EPI_ISL_1147265, EPI_ISL_1147266                                                                                                                                                                                                                                                                                                                                                                                                                                                                                                                                                                                                                                                                                                                                                                                                                                                                                                                                                                                                          | Corona-Testzentrum ifp Institut für Produktqualität GmbH                                                 | Robert Koch Institute                                 | unknown                                                                                                                                                               |
| EPI_ISL_1147289, EPI_ISL_1147310, EPI_ISL_1147331                                                                                                                                                                                                                                                                                                                                                                                                                                                                                                                                                                                                                                                                                                                                                                                                                                                                                                                                                                                         | MVZ Labor Dr. Limbach & Kollegen GbR                                                                     | Robert Koch Institute                                 | unknown                                                                                                                                                               |
| EPI_ISL_1147515, EPI_ISL_1147520                                                                                                                                                                                                                                                                                                                                                                                                                                                                                                                                                                                                                                                                                                                                                                                                                                                                                                                                                                                                          | IMD - Labor Oderland                                                                                     | Robert Koch Institute                                 | unknown                                                                                                                                                               |
| EPI_ISL_1147565, EPI_ISL_1147566, EPI_ISL_1147567, EPI_ISL_1147568, EPI_ISL_1147570, EPI_ISL_1147571, EPI_ISL_1147572, EPI_ISL_1147573, EPI_ISL_1147574, EPI_ISL_1147576, EPI_ISL_1147577                                                                                                                                                                                                                                                                                                                                                                                                                                                                                                                                                                                                                                                                                                                                                                                                                                                 |                                                                                                          |                                                       |                                                                                                                                                                       |
| see above                                                                                                                                                                                                                                                                                                                                                                                                                                                                                                                                                                                                                                                                                                                                                                                                                                                                                                                                                                                                                                 | LADR MVZ Zweigpraxis Bernau                                                                              | Robert Koch Institute                                 | unknown                                                                                                                                                               |
| EPI_ISL_1147701                                                                                                                                                                                                                                                                                                                                                                                                                                                                                                                                                                                                                                                                                                                                                                                                                                                                                                                                                                                                                           | amedes MVZ DIAMEDIS Sennestadt                                                                           | Robert Koch Institute                                 | unknown                                                                                                                                                               |
| EPI_ISL_1152633                                                                                                                                                                                                                                                                                                                                                                                                                                                                                                                                                                                                                                                                                                                                                                                                                                                                                                                                                                                                                           | SYNLAB MVZ Leverkusen                                                                                    | Robert Koch Institute                                 | unknown                                                                                                                                                               |
| EPI_ISL_1153290                                                                                                                                                                                                                                                                                                                                                                                                                                                                                                                                                                                                                                                                                                                                                                                                                                                                                                                                                                                                                           | Sonic - Labor Staber Dresden (Klipphausen)                                                               | Robert Koch Institute                                 | unknown                                                                                                                                                               |
| EPI_ISL_1154753                                                                                                                                                                                                                                                                                                                                                                                                                                                                                                                                                                                                                                                                                                                                                                                                                                                                                                                                                                                                                           | Bioscientia Labor Wermsdorf                                                                              | Robert Koch Institute                                 | unknown                                                                                                                                                               |
| EPI_ISL_1154781                                                                                                                                                                                                                                                                                                                                                                                                                                                                                                                                                                                                                                                                                                                                                                                                                                                                                                                                                                                                                           | Bioscientia MVZ Labor Karlsruhe GmbH                                                                     | Robert Koch Institute                                 | unknown                                                                                                                                                               |
| EPI_ISL_1154969                                                                                                                                                                                                                                                                                                                                                                                                                                                                                                                                                                                                                                                                                                                                                                                                                                                                                                                                                                                                                           | Bioscientia Labor Wermsdorf                                                                              | Robert Koch Institute                                 | unknown                                                                                                                                                               |
| EPI_ISL_1155702, EPI_ISL_1155708                                                                                                                                                                                                                                                                                                                                                                                                                                                                                                                                                                                                                                                                                                                                                                                                                                                                                                                                                                                                          | BIOMNIS LYON                                                                                             | CNR Virus des Infections Respiratoires - France SUD   | Antonin Bal, Gregory Destras, Gwendolyne Burfin, Hadrien Regue, Quentin Semanas, Martine Valette, Bruno Lina, Laurence Josset                                         |
| EPI_ISL_1157004, EPI_ISL_1157035, EPI_ISL_1157038, EPI_ISL_1157040, EPI_ISL_1157042, EPI_ISL_1157043, EPI_ISL_1157045                                                                                                                                                                                                                                                                                                                                                                                                                                                                                                                                                                                                                                                                                                                                                                                                                                                                                                                     | Virginia Division of Consolidated Laboratory Services                                                    | Virginia Division of Consolidated Laboratory Services | Virginia DCLS                                                                                                                                                         |
| EPI_ISL_1157144, EPI_ISL_1157145, EPI_ISL_1157146, EPI_ISL_1157147, EPI_ISL_1157148, EPI_ISL_1157149, EPI_ISL_1157150, EPI_ISL_1157151, EPI_ISL_1157152, EPI_ISL_1157153, EPI_ISL_1157154, EPI_ISL_1157156, EPI_ISL_1157159, EPI_ISL_1157160, EPI_ISL_1157161, EPI_ISL_1157162, EPI_ISL_1157164, EPI_ISL_1157166                                                                                                                                                                                                                                                                                                                                                                                                                                                                                                                                                                                                                                                                                                                          |                                                                                                          |                                                       |                                                                                                                                                                       |
| see above                                                                                                                                                                                                                                                                                                                                                                                                                                                                                                                                                                                                                                                                                                                                                                                                                                                                                                                                                                                                                                 | Landesgesundheitsamt Baden-Württemberg                                                                   | Robert Koch Institute                                 | unknown                                                                                                                                                               |
| EPI_ISL_1157401, EPI_ISL_1157402, EPI_ISL_1157404, EPI_ISL_1157406, EPI_ISL_1157423, EPI_ISL_1157429, EPI_ISL_1157430, EPI_ISL_1157432, EPI_ISL_1157436, EPI_ISL_1157437, EPI_ISL_1157439, EPI_ISL_1157441, EPI_ISL_1157443, EPI_ISL_1157444, EPI_ISL_1157448, EPI_ISL_1157450, EPI_ISL_1157452, EPI_ISL_1157454, EPI_ISL_1157459, EPI_ISL_1157461, EPI_ISL_1157462, EPI_ISL_1157464, EPI_ISL_1157466, EPI_ISL_1157470, EPI_ISL_1157472, EPI_ISL_1157476, EPI_ISL_1157477, EPI_ISL_1157479, EPI_ISL_1157481, EPI_ISL_1157482, EPI_ISL_1157484, EPI_ISL_1157486, EPI_ISL_1157489, EPI_ISL_1157491, EPI_ISL_1157493, EPI_ISL_1157494, EPI_ISL_1157496, EPI_ISL_1157498, EPI_ISL_1157500, EPI_ISL_1157502, EPI_ISL_1157503, EPI_ISL_1157505, EPI_ISL_1157507, EPI_ISL_1157509, EPI_ISL_1157510, EPI_ISL_1157517, EPI_ISL_1157519, EPI_ISL_1157520, EPI_ISL_1157522, EPI_ISL_1157524, EPI_ISL_1157525, EPI_ISL_1157529, EPI_ISL_1157530, EPI_ISL_1157532, EPI_ISL_1157534, EPI_ISL_1157536, EPI_ISL_1157537, EPI_ISL_1157539, EPI_ISL_1157541 |                                                                                                          |                                                       |                                                                                                                                                                       |
| see above                                                                                                                                                                                                                                                                                                                                                                                                                                                                                                                                                                                                                                                                                                                                                                                                                                                                                                                                                                                                                                 | Northwestern Memorial Hospital                                                                           | Northwestern University - Ozer Lab                    | Ramon Lorenzo-Redondo, Lacy M. Simons, Taylor J. Dean, Chad J. Achenbach, Lawrence J. Jennings, Chao Qi, Michael G. Ison, Judd F. Hultquist, Egon A. Ozer             |
| EPI_ISL_1159139                                                                                                                                                                                                                                                                                                                                                                                                                                                                                                                                                                                                                                                                                                                                                                                                                                                                                                                                                                                                                           | HOSPITAL COMARCAL DE MELILLA                                                                             | Instituto de Salud Carlos III                         | Vázquez-Morón, S. Iglesias-Caballero, M. Sandonís, V. Camarero, S. Pozo, F. Casas, I. Jiménez, P. Zaballos, A. Monzón, S. Varona, S. Cuesta, I.ROMAN SOTO, SERGIO     |
| EPI_ISL_1159150                                                                                                                                                                                                                                                                                                                                                                                                                                                                                                                                                                                                                                                                                                                                                                                                                                                                                                                                                                                                                           | HOSPITAL UNIVERSITARIO VIRGEN DE LA ARRIXACA                                                             | Instituto de Salud Carlos III                         | Vázquez-Morón, S. Iglesias-Caballero, M. Sandonís, V. Camarero, S. Pozo, F. Casas, I. Jiménez, P. Zaballos, A. Monzón, S. Varona, S. Cuesta, I. MORENO PARRADO, LAURA |







|                                                                                                                                                                                                                                                                                                                                                                                                                                                |                                                                                                                                                                               |                                                                                                                                                                  |                                                                                                                                                                                                                                                                                                                                                                                                                                                                                                                                                                                                                                                                                                                                                                                                                                                                                                                                                                                                                                                                                                                                                                                                                      |
|------------------------------------------------------------------------------------------------------------------------------------------------------------------------------------------------------------------------------------------------------------------------------------------------------------------------------------------------------------------------------------------------------------------------------------------------|-------------------------------------------------------------------------------------------------------------------------------------------------------------------------------|------------------------------------------------------------------------------------------------------------------------------------------------------------------|----------------------------------------------------------------------------------------------------------------------------------------------------------------------------------------------------------------------------------------------------------------------------------------------------------------------------------------------------------------------------------------------------------------------------------------------------------------------------------------------------------------------------------------------------------------------------------------------------------------------------------------------------------------------------------------------------------------------------------------------------------------------------------------------------------------------------------------------------------------------------------------------------------------------------------------------------------------------------------------------------------------------------------------------------------------------------------------------------------------------------------------------------------------------------------------------------------------------|
|                                                                                                                                                                                                                                                                                                                                                                                                                                                |                                                                                                                                                                               | Division of Viral Diseases, Centers for Disease Control and Prevention                                                                                           | Padilla, Sarah Nobles, Mark Burroughs, Lori Rowe, Haibin Wang, Ben L. Rambo-Martin, Dhvani Batra, Justin Lee, Suxiang Tong                                                                                                                                                                                                                                                                                                                                                                                                                                                                                                                                                                                                                                                                                                                                                                                                                                                                                                                                                                                                                                                                                           |
| EPI_ISL_1169545, EPI_ISL_1169547, EPI_ISL_1169554, EPI_ISL_1169559                                                                                                                                                                                                                                                                                                                                                                             | MN PHL Division, Minnesota Department of Health                                                                                                                               | Genomics and Discovery, Respiratory Viruses Branch, Division of Viral Diseases, Centers for Disease Control and Prevention                                       | Krista Queen, Yan Li, Ying Tao, Jing Zhang, Anna Uehara, Anna Montmayeur, Clinton R. Paden, Peter W. Cook, Rachel Marine, Mili Sheth, Jasmine Padilla, Sarah Nobles, Mark Burroughs, Lori Rowe, Haibin Wang, Ben L. Rambo-Martin, Dhvani Batra, Justin Lee, Suxiang Tong                                                                                                                                                                                                                                                                                                                                                                                                                                                                                                                                                                                                                                                                                                                                                                                                                                                                                                                                             |
| EPI_ISL_1169592<br>EPI_ISL_1170948                                                                                                                                                                                                                                                                                                                                                                                                             | Santa Clara County Public Health Laboratory<br>National Institute of Health Research and Development                                                                          | Santa Clara County Public Health Laboratory<br>National Institute of Health Research and Development                                                             | Santa Clara County Public Health Department<br>Ririn Ramadhany, Yuni Rukminiati, Agustiniingsih, Kindi Adam, Holy Arif Wibowo, Hana Apsari Pawestri, Subangkit, Kartika Dewi Puspa, Arie Ardiansyah Nugraha, Hartanti Dian Ikawati, Krisna Nur Andriana Pangesti, Ni Ketut Susilarini, Nur Ika Hariastuti, Uly Alfi Nikmah, Mursinah, Reni Herman, Nike Susanti, Herna, Tati Febriyanti, Natalie Laurencia Kipuw, Fauzul Muna, Aulia Rizki, Nelly Puspandari, Vivi Setiawaty                                                                                                                                                                                                                                                                                                                                                                                                                                                                                                                                                                                                                                                                                                                                         |
| EPI_ISL_1170955                                                                                                                                                                                                                                                                                                                                                                                                                                | National Institute of Health Research and Development                                                                                                                         | National Institute of Health Research and Development                                                                                                            | Yuni Rukminiati, Agustiniingsih, Kindi Adam, Holy Arif Wibowo, Ririn Ramadhany, Hana Apsari Pawestri, Subangkit, Kartika Dewi Puspa, Arie Ardiansyah Nugraha, Hartanti Dian Ikawati, Krisna Nur Andriana Pangesti, Ni Ketut Susilarini, Nur Ika Hariastuti, Uly Alfi Nikmah, Mursinah, Asri Febriyani, Reni Herman, Nike Susanti, Herna, Tati Febriyanti, Natalie Laurencia Kipuw, Fauzul Muna, Irene Lorinda Indalao, Aulia Rizki, Nelly Puspandari, Vivi Setiawaty                                                                                                                                                                                                                                                                                                                                                                                                                                                                                                                                                                                                                                                                                                                                                 |
| EPI_ISL_1171626, EPI_ISL_1171628, EPI_ISL_1171634, EPI_ISL_1171635, EPI_ISL_1171636, EPI_ISL_1171637, EPI_ISL_1171638, EPI_ISL_1171639, EPI_ISL_1171640                                                                                                                                                                                                                                                                                        | IAL Regional de Santos                                                                                                                                                        | Instituto Adolfo Lutz, Interdisciplinary Procedures Center, Strategic Laboratory                                                                                 | Claudio Tavares Sacchi, Claudia Regina Gonçalves, Erica Valessa Ramos Gomes, Karoline Rodrigues Campos, Caio Vinicius Dias Lopes                                                                                                                                                                                                                                                                                                                                                                                                                                                                                                                                                                                                                                                                                                                                                                                                                                                                                                                                                                                                                                                                                     |
| EPI_ISL_1171641, EPI_ISL_1171643, EPI_ISL_1171644, EPI_ISL_1171646, EPI_ISL_1171647                                                                                                                                                                                                                                                                                                                                                            | IAL Regional de Marília                                                                                                                                                       | Instituto Adolfo Lutz, Interdisciplinary Procedures Center, Strategic Laboratory                                                                                 | Claudio Tavares Sacchi, Claudia Regina Gonçalves, Erica Valessa Ramos Gomes, Karoline Rodrigues Campos, Caio Vinicius Dias Lopes                                                                                                                                                                                                                                                                                                                                                                                                                                                                                                                                                                                                                                                                                                                                                                                                                                                                                                                                                                                                                                                                                     |
| EPI_ISL_1171668, EPI_ISL_1171670, EPI_ISL_1171671<br>EPI_ISL_1171861                                                                                                                                                                                                                                                                                                                                                                           | IAL Regional de Presidente Prudente<br>Kentucky State Public Health Lab                                                                                                       | Instituto Adolfo Lutz, Interdisciplinary Procedures Center, Strategic Laboratory<br>Kentucky State Public Health Lab                                             | Claudio Tavares Sacchi, Claudia Regina Gonçalves, Erica Valessa Ramos Gomes, Karoline Rodrigues Campos, Caio Vinicius Dias Lopes<br>Stephanie Lunn, Karim George, Joshua Tobias, William Grooms, Vaneet Arora, Matthew Johnson, Rachel Zinner, Rhonda Lucas                                                                                                                                                                                                                                                                                                                                                                                                                                                                                                                                                                                                                                                                                                                                                                                                                                                                                                                                                          |
| EPI_ISL_1171978, EPI_ISL_1171983, EPI_ISL_1171985, EPI_ISL_1171998, EPI_ISL_1171999, EPI_ISL_1172000, EPI_ISL_1172004, EPI_ISL_1172006, EPI_ISL_1172007, EPI_ISL_1172008, EPI_ISL_1172009, EPI_ISL_1172010, EPI_ISL_1172011, EPI_ISL_1172012                                                                                                                                                                                                   | see above<br>Instituto Nacional de Saude (INSA)                                                                                                                               | Instituto Nacional de Saude (INSA)                                                                                                                               | Borges et al                                                                                                                                                                                                                                                                                                                                                                                                                                                                                                                                                                                                                                                                                                                                                                                                                                                                                                                                                                                                                                                                                                                                                                                                         |
| EPI_ISL_788911, EPI_ISL_788915, EPI_ISL_788917                                                                                                                                                                                                                                                                                                                                                                                                 | University of Wisconsin-Madison AIDS Vaccine Research Laboratories                                                                                                            | University of Wisconsin-Madison AIDS Vaccine Research Laboratories                                                                                               | Gage Moreno, Katarina Braun, et al. AIDS Vaccine Research Laboratories                                                                                                                                                                                                                                                                                                                                                                                                                                                                                                                                                                                                                                                                                                                                                                                                                                                                                                                                                                                                                                                                                                                                               |
| EPI_ISL_789074, EPI_ISL_789075, EPI_ISL_789078, EPI_ISL_789080, EPI_ISL_789081, EPI_ISL_789082, EPI_ISL_789099                                                                                                                                                                                                                                                                                                                                 | National Virus Reference Laboratory                                                                                                                                           | National Virus Reference Laboratory                                                                                                                              | Michael Carr, Gabriel Gonzalez, Dana Alalwan, Jonathan Dean, Daniel Hare, Cillian F De Gascun                                                                                                                                                                                                                                                                                                                                                                                                                                                                                                                                                                                                                                                                                                                                                                                                                                                                                                                                                                                                                                                                                                                        |
| EPI_ISL_791097, EPI_ISL_791100, EPI_ISL_791101, EPI_ISL_791102, EPI_ISL_791104, EPI_ISL_791105, EPI_ISL_791106, EPI_ISL_791107, EPI_ISL_791108, EPI_ISL_791109, EPI_ISL_791110, EPI_ISL_791111, EPI_ISL_791115, EPI_ISL_791116, EPI_ISL_791117, EPI_ISL_791119, EPI_ISL_791121, EPI_ISL_791122, EPI_ISL_791123, EPI_ISL_791125, EPI_ISL_791126, EPI_ISL_791127, EPI_ISL_791128, EPI_ISL_791130, EPI_ISL_791131, EPI_ISL_791138, EPI_ISL_791141 | University of Wisconsin-Madison AIDS Vaccine Research Laboratories                                                                                                            | University of Wisconsin-Madison AIDS Vaccine Research Laboratories                                                                                               | Gage Moreno, Katarina Braun, et al. AIDS Vaccine Research Laboratories                                                                                                                                                                                                                                                                                                                                                                                                                                                                                                                                                                                                                                                                                                                                                                                                                                                                                                                                                                                                                                                                                                                                               |
| EPI_ISL_791226, EPI_ISL_791228, EPI_ISL_791245, EPI_ISL_791248, EPI_ISL_791255, EPI_ISL_791258, EPI_ISL_791260, EPI_ISL_791261                                                                                                                                                                                                                                                                                                                 | Respiratory Virus Unit, National Infection Service, Public Health England                                                                                                     | COVID-19 Genomics UK (COG-UK) Consortium                                                                                                                         | PHE Covid Sequencing Team                                                                                                                                                                                                                                                                                                                                                                                                                                                                                                                                                                                                                                                                                                                                                                                                                                                                                                                                                                                                                                                                                                                                                                                            |
| EPI_ISL_791422, EPI_ISL_791423, EPI_ISL_791427, EPI_ISL_791429, EPI_ISL_791430<br>EPI_ISL_792090                                                                                                                                                                                                                                                                                                                                               | Johns Hopkins Hospital Department of Pathology<br>Toronto Invasive Bacterial Diseases Network                                                                                 | Johns Hopkins Hospital Department of Pathology<br>McMaster University                                                                                            | C. Paul Morris, Chun Huai Luo, Adannaya Amadi, Nicholas Gallagher, Heba H. Mostafa<br>Allison McGeer, Patryk Aftanas, Hooman Derakhshani, Angel Li, Kuganya Nirmalarajah, Emily Panousis, Ahmed Draia, Jalees Nasir, Michael Surette, Samira Mubareka, Andrew G. McArthur                                                                                                                                                                                                                                                                                                                                                                                                                                                                                                                                                                                                                                                                                                                                                                                                                                                                                                                                            |
| EPI_ISL_794206, EPI_ISL_794207                                                                                                                                                                                                                                                                                                                                                                                                                 | Wadsworth Center, New York State Department.of Health                                                                                                                         | Wadsworth Center, New York State Department.of Health                                                                                                            | Kirsten St. George, Daryl M. Lamson, Alexis Russel, Matthew Shudt, Melissa A Leisner, Jonathan Plitnick, Navjot Singh, John Kelly, Sara Griesemer, Erasmus Schneider, Erica Lasek-Nesselquist                                                                                                                                                                                                                                                                                                                                                                                                                                                                                                                                                                                                                                                                                                                                                                                                                                                                                                                                                                                                                        |
| EPI_ISL_794264, EPI_ISL_794266, EPI_ISL_794267, EPI_ISL_794268, EPI_ISL_794269, EPI_ISL_794271, EPI_ISL_794274, EPI_ISL_794275, EPI_ISL_794276, EPI_ISL_794277, EPI_ISL_794279, EPI_ISL_794280                                                                                                                                                                                                                                                 | see above<br>WESTCHESTER MEDICAL CENTER                                                                                                                                       | Wadsworth Center, New York State Department.of Health                                                                                                            | Kirsten St. George, Daryl M. Lamson, Alexis Russel, Matthew Shudt, Melissa A Leisner, Jonathan Plitnick, Navjot Singh, John Kelly, Sara Griesemer, Erasmus Schneider, Erica Lasek-Nesselquist                                                                                                                                                                                                                                                                                                                                                                                                                                                                                                                                                                                                                                                                                                                                                                                                                                                                                                                                                                                                                        |
| EPI_ISL_794308, EPI_ISL_794309, EPI_ISL_794312, EPI_ISL_794313, EPI_ISL_794315, EPI_ISL_794316, EPI_ISL_794317, EPI_ISL_794318                                                                                                                                                                                                                                                                                                                 | Wadsworth Center, New York State Department.of Health                                                                                                                         | Wadsworth Center, New York State Department.of Health                                                                                                            | Kirsten St. George, Daryl M. Lamson, Alexis Russel, Matthew Shudt, Melissa A Leisner, Jonathan Plitnick, Navjot Singh, John Kelly, Sara Griesemer, Erasmus Schneider, Erica Lasek-Nesselquist                                                                                                                                                                                                                                                                                                                                                                                                                                                                                                                                                                                                                                                                                                                                                                                                                                                                                                                                                                                                                        |
| EPI_ISL_794613, EPI_ISL_794614, EPI_ISL_794615, EPI_ISL_794616, EPI_ISL_794617, EPI_ISL_794618, EPI_ISL_794619, EPI_ISL_794623<br>EPI_ISL_794625, EPI_ISL_794626                                                                                                                                                                                                                                                                               | LabPLUS<br>Middlemore Hospital                                                                                                                                                | Institute of Environmental Science and Research (ESR)<br>Institute of Environmental Science and Research (ESR)                                                   | Xiaoyun Ren, Matt Storey, Nikki Freed, Muhammad Faisal, Jing Wang, Hermes Perez, Anja Werno, Antje van der Linden, Arlo Upton, Chris Mansell, David Hammer, Dragana Drinkovic, Gary McAuliffe, Hana Sofia Andersson, James Ussher, Jill Sherwood, Josh Freeman, Julia Howard, Juliet Elvy, Mary DeAlmeida, Matt Blakiston, Matthew Rogers, Max Bloomfield, Michael Addidle, Michelle Balm, Sally Roberts, Sarah Jefferies, Sharmini Muttaiyah, Susan Morpeth, Susan Taylor, Timothy Blackmore, Vani Sathyendran, Veronica Playle, Virginia Hope, Erasmus Smit, Lauren Jelly, Olin Silander, Joep de Ligt<br>Xiaoyun Ren, Matt Storey, Nikki Freed, Muhammad Faisal, Jing Wang, Hermes Perez, Anja Werno, Antje van der Linden, Arlo Upton, Chris Mansell, David Hammer, Dragana Drinkovic, Gary McAuliffe, Hana Sofia Andersson, James Ussher, Jill Sherwood, Josh Freeman, Julia Howard, Juliet Elvy, Mary DeAlmeida, Matt Blakiston, Matthew Rogers, Max Bloomfield, Michael Addidle, Michelle Balm, Sally Roberts, Sarah Jefferies, Sharmini Muttaiyah, Susan Morpeth, Susan Taylor, Timothy Blackmore, Vani Sathyendran, Veronica Playle, Virginia Hope, Erasmus Smit, Lauren Jelly, Olin Silander, Joep de Ligt |
| EPI_ISL_794744                                                                                                                                                                                                                                                                                                                                                                                                                                 | National Institute of Infectious Diseases-Prof. Dr. Matei Bals<br>Molecular Diagnostics Laboratory                                                                            | National Institute of Infectious Diseases-Prof. Dr. Matei Bals<br>Molecular Diagnostics Laboratory                                                               | Leontina Banica, Marius Surleac, Corina Casangiu, Petre Milu, Andreea Tudor, Simona Paraschiv, Dan Otelea                                                                                                                                                                                                                                                                                                                                                                                                                                                                                                                                                                                                                                                                                                                                                                                                                                                                                                                                                                                                                                                                                                            |
| EPI_ISL_796013, EPI_ISL_796014, EPI_ISL_796015, EPI_ISL_796016, EPI_ISL_796017, EPI_ISL_796019, EPI_ISL_796020, EPI_ISL_796021, EPI_ISL_796023, EPI_ISL_796024, EPI_ISL_796025, EPI_ISL_796026                                                                                                                                                                                                                                                 | see above<br>Hebei Provincial Center for Disease Control and Prevention, Shijiazhuang, Hebei Province; National Institute for Viral Disease Control and Prevention, China CDC | Hebei Provincial Center for Disease Control and Prevention, Shijiazhuang, Hebei Province; National Institute for Viral Disease Control and Prevention, China CDC | Shunxiang Qi, Xiang Zhao, Nankun Liu, George F. Gao, Yang Song, Wenbo Xu, Qi Li                                                                                                                                                                                                                                                                                                                                                                                                                                                                                                                                                                                                                                                                                                                                                                                                                                                                                                                                                                                                                                                                                                                                      |
| EPI_ISL_796755, EPI_ISL_796756, EPI_ISL_796757, EPI_ISL_796758, EPI_ISL_796762, EPI_ISL_796765<br>EPI_ISL_797432                                                                                                                                                                                                                                                                                                                               | Instituto Nacional de Saude (INSA)<br>Lighthouse Lab in Glasgow                                                                                                               | Instituto Nacional de Saude (INSA)<br>Wellcome Sanger Institute for the COVID-19 Genomics UK (COG-UK) Consortium                                                 | Borges et al<br>Harper VanSteenhouse, Yumi Kasai, David Gray, Carol Clugston, Anna Dominiczak and Alex Alderton, Roberto Amato, Sonia Goncalves, Ewan Harrison, David K. Jackson, Ian Johnston, Dominic Kwiatkowski, Cordelia Langford, John Sillitoe on behalf of the Wellcome Sanger Institute COVID-19 Surveillance Team                                                                                                                                                                                                                                                                                                                                                                                                                                                                                                                                                                                                                                                                                                                                                                                                                                                                                          |

[illegible]

[illegible]

[illegible]

[illegible]



We gratefully acknowledge the following Authors from the Originating laboratories responsible for obtaining the specimens, as well as the Submitting laboratories where the genome data were generated and shared via GISAID, on which this research is based.

All Submitters of data may be contacted directly via [www.gisaid.org](http://www.gisaid.org)

Authors are sorted alphabetically.

| Accession ID                                                                                                                                                                                                                                                                                                                                                                                                                                                                                                                                                                                                                                                                                                                                                                                                                                                                                                                                                                                                                                                                                                                                                                                                                                                                                                                                                                                                                                                                                                                                                                                                                                                                                                                                                                                                                                                                                                                                                                                                                                                                                                                                                                                                                                                                                                                                                                                                                                                                                                                                                                                                                                                                                                                                                                                                                                                                                                                                                                                                                                                                                                                                                                                                                                                                                                                                                                                                                                                                                                                                                                                                                                                                                                                                                                                                                                                                                                                                                                                   | Originating Laboratory | Submitting Laboratory                                                                                    | Authors                                                                            |                                                                                                                                                                                                                                                                                                                                                                                                                                                           |
|------------------------------------------------------------------------------------------------------------------------------------------------------------------------------------------------------------------------------------------------------------------------------------------------------------------------------------------------------------------------------------------------------------------------------------------------------------------------------------------------------------------------------------------------------------------------------------------------------------------------------------------------------------------------------------------------------------------------------------------------------------------------------------------------------------------------------------------------------------------------------------------------------------------------------------------------------------------------------------------------------------------------------------------------------------------------------------------------------------------------------------------------------------------------------------------------------------------------------------------------------------------------------------------------------------------------------------------------------------------------------------------------------------------------------------------------------------------------------------------------------------------------------------------------------------------------------------------------------------------------------------------------------------------------------------------------------------------------------------------------------------------------------------------------------------------------------------------------------------------------------------------------------------------------------------------------------------------------------------------------------------------------------------------------------------------------------------------------------------------------------------------------------------------------------------------------------------------------------------------------------------------------------------------------------------------------------------------------------------------------------------------------------------------------------------------------------------------------------------------------------------------------------------------------------------------------------------------------------------------------------------------------------------------------------------------------------------------------------------------------------------------------------------------------------------------------------------------------------------------------------------------------------------------------------------------------------------------------------------------------------------------------------------------------------------------------------------------------------------------------------------------------------------------------------------------------------------------------------------------------------------------------------------------------------------------------------------------------------------------------------------------------------------------------------------------------------------------------------------------------------------------------------------------------------------------------------------------------------------------------------------------------------------------------------------------------------------------------------------------------------------------------------------------------------------------------------------------------------------------------------------------------------------------------------------------------------------------------------------------------|------------------------|----------------------------------------------------------------------------------------------------------|------------------------------------------------------------------------------------|-----------------------------------------------------------------------------------------------------------------------------------------------------------------------------------------------------------------------------------------------------------------------------------------------------------------------------------------------------------------------------------------------------------------------------------------------------------|
| EPI_ISL_818884, EPI_ISL_818885, EPI_ISL_818886, EPI_ISL_818887, EPI_ISL_818888, EPI_ISL_818889, EPI_ISL_818890, EPI_ISL_818891, EPI_ISL_818892, EPI_ISL_818893, EPI_ISL_818894, EPI_ISL_818895, EPI_ISL_818896, EPI_ISL_818897, EPI_ISL_818898, EPI_ISL_818899, EPI_ISL_818900, EPI_ISL_818901, EPI_ISL_818902, EPI_ISL_818903, EPI_ISL_818904, EPI_ISL_818905, EPI_ISL_818906, EPI_ISL_818907, EPI_ISL_818908, EPI_ISL_818909, EPI_ISL_818910, EPI_ISL_818911, EPI_ISL_818912, EPI_ISL_818913, EPI_ISL_818914, EPI_ISL_818915, EPI_ISL_818916, EPI_ISL_818917, EPI_ISL_818918, EPI_ISL_818919, EPI_ISL_818920, EPI_ISL_818921, EPI_ISL_818922, EPI_ISL_818923, EPI_ISL_818924, EPI_ISL_818925, EPI_ISL_818926, EPI_ISL_818927, EPI_ISL_818928, EPI_ISL_818929, EPI_ISL_818930, EPI_ISL_818931, EPI_ISL_818932, EPI_ISL_818933, EPI_ISL_818934, EPI_ISL_818935, EPI_ISL_818936, EPI_ISL_818937, EPI_ISL_818938, EPI_ISL_818939, EPI_ISL_818940, EPI_ISL_818941, EPI_ISL_818942, EPI_ISL_818943, EPI_ISL_818944, EPI_ISL_818945, EPI_ISL_818946, EPI_ISL_818947, EPI_ISL_818948, EPI_ISL_818949, EPI_ISL_818950, EPI_ISL_818951, EPI_ISL_818952, EPI_ISL_818953, EPI_ISL_818954, EPI_ISL_818955, EPI_ISL_818956, EPI_ISL_818957, EPI_ISL_818958, EPI_ISL_818959, EPI_ISL_818960, EPI_ISL_818961, EPI_ISL_818962, EPI_ISL_818963, EPI_ISL_818964, EPI_ISL_818965, EPI_ISL_818966, EPI_ISL_818967, EPI_ISL_818968, EPI_ISL_818969, EPI_ISL_818970, EPI_ISL_818971, EPI_ISL_818972, EPI_ISL_818973, EPI_ISL_818974, EPI_ISL_818975, EPI_ISL_818976, EPI_ISL_818977, EPI_ISL_818978, EPI_ISL_818979, EPI_ISL_818980, EPI_ISL_818981, EPI_ISL_818982, EPI_ISL_818983, EPI_ISL_818984, EPI_ISL_818985, EPI_ISL_818986, EPI_ISL_818987, EPI_ISL_818988, EPI_ISL_818989, EPI_ISL_818990, EPI_ISL_818991, EPI_ISL_818992, EPI_ISL_818993, EPI_ISL_818994, EPI_ISL_818995, EPI_ISL_818996, EPI_ISL_818997, EPI_ISL_818998, EPI_ISL_818999, EPI_ISL_819000, EPI_ISL_819001, EPI_ISL_819002, EPI_ISL_819003, EPI_ISL_819004, EPI_ISL_819005, EPI_ISL_819006, EPI_ISL_819007, EPI_ISL_819008, EPI_ISL_819009, EPI_ISL_819010, EPI_ISL_819011, EPI_ISL_819012, EPI_ISL_819013, EPI_ISL_819014, EPI_ISL_819015, EPI_ISL_819016, EPI_ISL_819017, EPI_ISL_819018, EPI_ISL_819019, EPI_ISL_819020, EPI_ISL_819021, EPI_ISL_819022, EPI_ISL_819023, EPI_ISL_819024, EPI_ISL_819025, EPI_ISL_819026, EPI_ISL_819027, EPI_ISL_819028, EPI_ISL_819029, EPI_ISL_819030, EPI_ISL_819031, EPI_ISL_819032, EPI_ISL_819033, EPI_ISL_819034, EPI_ISL_819035, EPI_ISL_819036, EPI_ISL_819037, EPI_ISL_819038, EPI_ISL_819039, EPI_ISL_819040, EPI_ISL_819041, EPI_ISL_819042, EPI_ISL_819043, EPI_ISL_819044, EPI_ISL_819045, EPI_ISL_819046, EPI_ISL_819047, EPI_ISL_819048, EPI_ISL_819049, EPI_ISL_819050, EPI_ISL_819051, EPI_ISL_819052, EPI_ISL_819053, EPI_ISL_819054, EPI_ISL_819055, EPI_ISL_819056, EPI_ISL_819057, EPI_ISL_819058, EPI_ISL_819059, EPI_ISL_819060, EPI_ISL_819061, EPI_ISL_819062, EPI_ISL_819063, EPI_ISL_819064, EPI_ISL_819065, EPI_ISL_819066, EPI_ISL_819067, EPI_ISL_819068, EPI_ISL_819069, EPI_ISL_819070, EPI_ISL_819071, EPI_ISL_819072, EPI_ISL_819073, EPI_ISL_819074, EPI_ISL_819075, EPI_ISL_819076, EPI_ISL_819077, EPI_ISL_819078, EPI_ISL_819079, EPI_ISL_819080, EPI_ISL_819081, EPI_ISL_819082, EPI_ISL_819083, EPI_ISL_819084, EPI_ISL_819085, EPI_ISL_819086, EPI_ISL_819087, EPI_ISL_819088, EPI_ISL_819089, EPI_ISL_819090, EPI_ISL_819091, EPI_ISL_819092, EPI_ISL_819093, EPI_ISL_819094, EPI_ISL_819095, EPI_ISL_819096, EPI_ISL_819097, EPI_ISL_819098, EPI_ISL_819099, EPI_ISL_819100, EPI_ISL_819101, EPI_ISL_819102, EPI_ISL_819103, EPI_ISL_819104, EPI_ISL_819105, EPI_ISL_819106, EPI_ISL_819107, EPI_ISL_819108, EPI_ISL_819109, EPI_ISL_819110, EPI_ISL_819111, EPI_ISL_819112, EPI_ISL_819113, EPI_ISL_819114, EPI_ISL_819115, EPI_ISL_819116, EPI_ISL_819117, EPI_ISL_819118, EPI_ISL_819119, EPI_ISL_819120, EPI_ISL_819121, EPI_ISL_819122, EPI_ISL_819123 | see above              | Department of Virus and Microbiological Special Diagnostics, Statens Serum Institut, Copenhagen, Denmark | Albertsen Lab, Department of Chemistry and Bioscience, Aalborg University, Denmark | Danish Covid-19 Genome Consortium                                                                                                                                                                                                                                                                                                                                                                                                                         |
| EPI_ISL_819391, EPI_ISL_819405, EPI_ISL_819410, EPI_ISL_819420, EPI_ISL_819443, EPI_ISL_820568                                                                                                                                                                                                                                                                                                                                                                                                                                                                                                                                                                                                                                                                                                                                                                                                                                                                                                                                                                                                                                                                                                                                                                                                                                                                                                                                                                                                                                                                                                                                                                                                                                                                                                                                                                                                                                                                                                                                                                                                                                                                                                                                                                                                                                                                                                                                                                                                                                                                                                                                                                                                                                                                                                                                                                                                                                                                                                                                                                                                                                                                                                                                                                                                                                                                                                                                                                                                                                                                                                                                                                                                                                                                                                                                                                                                                                                                                                 |                        | Quadram Institute Bioscience                                                                             | COVID-19 Genomics UK (COG-UK) Consortium                                           | Dave J. Baker, Gemma L. Kay, Alp Aydin, Thanh Le-Viet, Steven Rudder, Ana P. Tedim, Anastasia Kolyva, Maria Diaz, Leonardo de Oliveira Martins, Nabil-Fareed Aikhan, Lizzie Meadours, Rachael Stanley, Ngozi Elumogo, Muhammed Yasir, Nicholas M. Thomson, Alexander J Trotter, Rachel Gilroy, Samuel Bloomfield, Claire Stuart, Andrew Bell, Reenesh Prakash, Samir Derwisevic, Alison E. Mather, John Wain, Mark Webber, Andrew J. Page, Justin O'Grady |
| EPI_ISL_820586, EPI_ISL_820605                                                                                                                                                                                                                                                                                                                                                                                                                                                                                                                                                                                                                                                                                                                                                                                                                                                                                                                                                                                                                                                                                                                                                                                                                                                                                                                                                                                                                                                                                                                                                                                                                                                                                                                                                                                                                                                                                                                                                                                                                                                                                                                                                                                                                                                                                                                                                                                                                                                                                                                                                                                                                                                                                                                                                                                                                                                                                                                                                                                                                                                                                                                                                                                                                                                                                                                                                                                                                                                                                                                                                                                                                                                                                                                                                                                                                                                                                                                                                                 |                        | Queens Medical Centre, Clinical Microbiology Department / DeepSeq Nottingham                             | COVID-19 Genomics UK (COG-UK) Consortium                                           | Gemma Clark, Wendy Smith, Manjinder Khakh, Vicki M Fleming, Michelle M Lister, Hannah Howson-Wells, Jonathan Ball, Patrick McClure, Joseph Chappell, Theocharis Tsolieridis, Nadine Holmes, Matthew Carlisle, Christopher Moore, Fei Sang, Johnny Debebe, Victoria Wright, Matthew Loose                                                                                                                                                                  |
| EPI_ISL_820649, EPI_ISL_820650, EPI_ISL_820654, EPI_ISL_820655, EPI_ISL_820658, EPI_ISL_820659, EPI_ISL_820661, EPI_ISL_820662, EPI_ISL_820663, EPI_ISL_820666, EPI_ISL_820667, EPI_ISL_820680, EPI_ISL_820681, EPI_ISL_820682, EPI_ISL_820684, EPI_ISL_820685, EPI_ISL_820689, EPI_ISL_820690, EPI_ISL_820691, EPI_ISL_820696, EPI_ISL_820697, EPI_ISL_820711, EPI_ISL_820712, EPI_ISL_820713, EPI_ISL_820715, EPI_ISL_820716, EPI_ISL_820717, EPI_ISL_820718, EPI_ISL_820721, EPI_ISL_820724, EPI_ISL_820725, EPI_ISL_820726, EPI_ISL_820727, EPI_ISL_820728, EPI_ISL_820729, EPI_ISL_820730, EPI_ISL_820731, EPI_ISL_820732, EPI_ISL_820734, EPI_ISL_820738, EPI_ISL_820741, EPI_ISL_820742, EPI_ISL_820744, EPI_ISL_820745, EPI_ISL_820749, EPI_ISL_820750, EPI_ISL_820752, EPI_ISL_820753, EPI_ISL_820754, EPI_ISL_820755, EPI_ISL_820756, EPI_ISL_820757, EPI_ISL_820758, EPI_ISL_820760, EPI_ISL_820761, EPI_ISL_820762, EPI_ISL_820763, EPI_ISL_820766, EPI_ISL_820768, EPI_ISL_820770, EPI_ISL_820771, EPI_ISL_820772, EPI_ISL_820773, EPI_ISL_820774, EPI_ISL_820775, EPI_ISL_820776, EPI_ISL_820777, EPI_ISL_820779, EPI_ISL_820780, EPI_ISL_820781, EPI_ISL_820785, EPI_ISL_820786, EPI_ISL_820787, EPI_ISL_820788, EPI_ISL_820789, EPI_ISL_820791, EPI_ISL_820792, EPI_ISL_820793, EPI_ISL_820795, EPI_ISL_820796, EPI_ISL_820798, EPI_ISL_820800, EPI_ISL_820801, EPI_ISL_820804, EPI_ISL_820805, EPI_ISL_820806, EPI_ISL_820807, EPI_ISL_820808, EPI_ISL_820810, EPI_ISL_820812, EPI_ISL_820814, EPI_ISL_820815, EPI_ISL_820816, EPI_ISL_820817, EPI_ISL_820818, EPI_ISL_820820, EPI_ISL_820821, EPI_ISL_820822, EPI_ISL_820823, EPI_ISL_820824, EPI_ISL_820825, EPI_ISL_820826, EPI_ISL_820828, EPI_ISL_820829, EPI_ISL_820830, EPI_ISL_820831, EPI_ISL_820832, EPI_ISL_820834, EPI_ISL_820835, EPI_ISL_820836, EPI_ISL_820838, EPI_ISL_820840, EPI_ISL_820841, EPI_ISL_820842, EPI_ISL_820843, EPI_ISL_820844, EPI_ISL_820845, EPI_ISL_820847, EPI_ISL_820848, EPI_ISL_820849, EPI_ISL_820850, EPI_ISL_820852, EPI_ISL_820853, EPI_ISL_820854, EPI_ISL_820855, EPI_ISL_820856, EPI_ISL_820859, EPI_ISL_820860, EPI_ISL_820861, EPI_ISL_820863, EPI_ISL_820864, EPI_ISL_820866, EPI_ISL_820869, EPI_ISL_820870, EPI_ISL_820871, EPI_ISL_820873, EPI_ISL_820875, EPI_ISL_820877, EPI_ISL_820878, EPI_ISL_820879, EPI_ISL_820880, EPI_ISL_820881, EPI_ISL_820882, EPI_ISL_820883, EPI_ISL_820884, EPI_ISL_820887, EPI_ISL_820888, EPI_ISL_820890, EPI_ISL_820891, EPI_ISL_820892, EPI_ISL_820893, EPI_ISL_820896, EPI_ISL_820899, EPI_ISL_820900, EPI_ISL_820901, EPI_ISL_820902, EPI_ISL_820903, EPI_ISL_820904, EPI_ISL_820905, EPI_ISL_820907, EPI_ISL_820909, EPI_ISL_820910, EPI_ISL_820911, EPI_ISL_820912, EPI_ISL_820913, EPI_ISL_820914, EPI_ISL_820916, EPI_ISL_820917, EPI_ISL_820918, EPI_ISL_820919, EPI_ISL_820920, EPI_ISL_820921, EPI_ISL_820923, EPI_ISL_820924, EPI_ISL_820926, EPI_ISL_820927, EPI_ISL_820929, EPI_ISL_820930, EPI_ISL_820932, EPI_ISL_820933, EPI_ISL_820937, EPI_ISL_820939, EPI_ISL_820941, EPI_ISL_820942, EPI_ISL_820943, EPI_ISL_820944, EPI_ISL_820946, EPI_ISL_820947, EPI_ISL_820950, EPI_ISL_820951, EPI_ISL_820953, EPI_ISL_820955, EPI_ISL_820957, EPI_ISL_820959, EPI_ISL_820960, EPI_ISL_820961, EPI_ISL_820963, EPI_ISL_820964, EPI_ISL_820965, EPI_ISL_820966, EPI_ISL_820967, EPI_ISL_820968, EPI_ISL_820969, EPI_ISL_820970, EPI_ISL_820972, EPI_ISL_820973, EPI_ISL_820974, EPI_ISL_820975, EPI_ISL_820976, EPI_ISL_820979, EPI_ISL_820980, EPI_ISL_820981, EPI_ISL_820983, EPI_ISL_820984, EPI_ISL_820985, EPI_ISL_820986, EPI_ISL_820989, EPI_ISL_820991, EPI_ISL_820992, EPI_ISL_820993, EPI_ISL_820994, EPI_ISL_820995, EPI_ISL_820996, EPI_ISL_820997, EPI_ISL_820998, EPI_ISL_820999, EPI_ISL_821000, EPI_ISL_821001                                                                                                                                                                                                 | see above              | Lighthouse Lab in Milton Keynes                                                                          | Wellcome Sanger Institute for the COVID-19 Genomics UK (COG-UK) Consortium         | The Lighthouse Lab in Milton Keynes and Alex Alderton, Roberto Amato, Sonia Goncalves, Ewan Harrison, David K. Jackson, Ian Johnston, Dominic Kwiatkowski, Cordelia Langford, John Sillitoe on behalf of the Wellcome Sanger Institute COVID-19 Surveillance Team                                                                                                                                                                                         |
| EPI_ISL_821002, EPI_ISL_821003, EPI_ISL_821004, EPI_ISL_821005, EPI_ISL_821008, EPI_ISL_821009, EPI_ISL_821010, EPI_ISL_821011, EPI_ISL_821013, EPI_ISL_821015, EPI_ISL_821017, EPI_ISL_821018, EPI_ISL_821020, EPI_ISL_821022, EPI_ISL_821023, EPI_ISL_821024, EPI_ISL_821026, EPI_ISL_821031                                                                                                                                                                                                                                                                                                                                                                                                                                                                                                                                                                                                                                                                                                                                                                                                                                                                                                                                                                                                                                                                                                                                                                                                                                                                                                                                                                                                                                                                                                                                                                                                                                                                                                                                                                                                                                                                                                                                                                                                                                                                                                                                                                                                                                                                                                                                                                                                                                                                                                                                                                                                                                                                                                                                                                                                                                                                                                                                                                                                                                                                                                                                                                                                                                                                                                                                                                                                                                                                                                                                                                                                                                                                                                 | see above              | Lighthouse Lab in Alderley Park                                                                          | Wellcome Sanger Institute for the COVID-19 Genomics UK (COG-UK) Consortium         | Jacquelyn Wynn, Mairead Hyland, The Lighthouse Lab in Alderley Park and Alex Alderton, Roberto Amato, Sonia Goncalves, Ewan Harrison, David K. Jackson, Ian Johnston, Dominic Kwiatkowski, Cordelia Langford, John Sillitoe on behalf of the Wellcome Sanger Institute COVID-19 Surveillance Team                                                                                                                                                         |
| EPI_ISL_821032                                                                                                                                                                                                                                                                                                                                                                                                                                                                                                                                                                                                                                                                                                                                                                                                                                                                                                                                                                                                                                                                                                                                                                                                                                                                                                                                                                                                                                                                                                                                                                                                                                                                                                                                                                                                                                                                                                                                                                                                                                                                                                                                                                                                                                                                                                                                                                                                                                                                                                                                                                                                                                                                                                                                                                                                                                                                                                                                                                                                                                                                                                                                                                                                                                                                                                                                                                                                                                                                                                                                                                                                                                                                                                                                                                                                                                                                                                                                                                                 |                        | Lighthouse Lab in Glasgow                                                                                | Wellcome Sanger Institute for the COVID-19 Genomics UK (COG-UK) Consortium         | Harper VanSteenhouse, Yumi Kasai, David Gray, Carol Clugston, Anna Dominiczak and Alex Alderton, Roberto Amato, Sonia Goncalves, Ewan Harrison, David K. Jackson, Ian Johnston, Dominic Kwiatkowski, Cordelia Langford, John Sillitoe on behalf of the Wellcome Sanger Institute COVID-19 Surveillance Team                                                                                                                                               |
| EPI_ISL_821034, EPI_ISL_821035, EPI_ISL_821038, EPI_ISL_821040, EPI_ISL_821041, EPI_ISL_821042, EPI_ISL_821044, EPI_ISL_821045, EPI_ISL_821046, EPI_ISL_821047, EPI_ISL_821048, EPI_ISL_821050, EPI_ISL_821051, EPI_ISL_821054, EPI_ISL_821055, EPI_ISL_821057, EPI_ISL_821063, EPI_ISL_821064, EPI_ISL_821065, EPI_ISL_821066, EPI_ISL_821067, EPI_ISL_821068                                                                                                                                                                                                                                                                                                                                                                                                                                                                                                                                                                                                                                                                                                                                                                                                                                                                                                                                                                                                                                                                                                                                                                                                                                                                                                                                                                                                                                                                                                                                                                                                                                                                                                                                                                                                                                                                                                                                                                                                                                                                                                                                                                                                                                                                                                                                                                                                                                                                                                                                                                                                                                                                                                                                                                                                                                                                                                                                                                                                                                                                                                                                                                                                                                                                                                                                                                                                                                                                                                                                                                                                                                 | see above              | Lighthouse Lab in Alderley Park                                                                          | Wellcome Sanger Institute for the COVID-19 Genomics UK (COG-UK) Consortium         | Jacquelyn Wynn, Mairead Hyland, The Lighthouse Lab in Alderley Park and Alex Alderton, Roberto Amato, Sonia Goncalves, Ewan Harrison, David K. Jackson, Ian Johnston, Dominic Kwiatkowski, Cordelia Langford, John Sillitoe on behalf of the Wellcome Sanger Institute COVID-19 Surveillance Team                                                                                                                                                         |
| EPI_ISL_821069                                                                                                                                                                                                                                                                                                                                                                                                                                                                                                                                                                                                                                                                                                                                                                                                                                                                                                                                                                                                                                                                                                                                                                                                                                                                                                                                                                                                                                                                                                                                                                                                                                                                                                                                                                                                                                                                                                                                                                                                                                                                                                                                                                                                                                                                                                                                                                                                                                                                                                                                                                                                                                                                                                                                                                                                                                                                                                                                                                                                                                                                                                                                                                                                                                                                                                                                                                                                                                                                                                                                                                                                                                                                                                                                                                                                                                                                                                                                                                                 |                        | Lighthouse Lab in Glasgow                                                                                | Wellcome Sanger Institute for the COVID-19 Genomics UK (COG-UK) Consortium         | Harper VanSteenhouse, Yumi Kasai, David Gray, Carol Clugston, Anna Dominiczak and Alex Alderton, Roberto Amato, Sonia Goncalves, Ewan Harrison, David K. Jackson, Ian Johnston, Dominic Kwiatkowski, Cordelia Langford, John Sillitoe on behalf of the Wellcome Sanger Institute COVID-19 Surveillance Team                                                                                                                                               |
| EPI_ISL_821070, EPI_ISL_821071, EPI_ISL_821072, EPI_ISL_821073, EPI_ISL_821075, EPI_ISL_821076, EPI_ISL_821078, EPI_ISL_821079, EPI_ISL_821082, EPI_ISL_821083, EPI_ISL_821085, EPI_ISL_821086, EPI_ISL_821087, EPI_ISL_821088, EPI_ISL_821090, EPI_ISL_821091, EPI_ISL_821092, EPI_ISL_821093, EPI_ISL_821094, EPI_ISL_821095, EPI_ISL_821096, EPI_ISL_821097, EPI_ISL_821099, EPI_ISL_821100, EPI_ISL_821101, EPI_ISL_821102                                                                                                                                                                                                                                                                                                                                                                                                                                                                                                                                                                                                                                                                                                                                                                                                                                                                                                                                                                                                                                                                                                                                                                                                                                                                                                                                                                                                                                                                                                                                                                                                                                                                                                                                                                                                                                                                                                                                                                                                                                                                                                                                                                                                                                                                                                                                                                                                                                                                                                                                                                                                                                                                                                                                                                                                                                                                                                                                                                                                                                                                                                                                                                                                                                                                                                                                                                                                                                                                                                                                                                 | see above              | Lighthouse Lab in Alderley Park                                                                          | Wellcome Sanger Institute for the COVID-19 Genomics UK (COG-UK) Consortium         | Jacquelyn Wynn, Mairead Hyland, The Lighthouse Lab in Alderley Park and Alex Alderton, Roberto Amato, Sonia Goncalves, Ewan Harrison, David K. Jackson, Ian Johnston, Dominic Kwiatkowski, Cordelia Langford, John Sillitoe on behalf of the Wellcome Sanger Institute COVID-19 Surveillance Team                                                                                                                                                         |
| EPI_ISL_821105                                                                                                                                                                                                                                                                                                                                                                                                                                                                                                                                                                                                                                                                                                                                                                                                                                                                                                                                                                                                                                                                                                                                                                                                                                                                                                                                                                                                                                                                                                                                                                                                                                                                                                                                                                                                                                                                                                                                                                                                                                                                                                                                                                                                                                                                                                                                                                                                                                                                                                                                                                                                                                                                                                                                                                                                                                                                                                                                                                                                                                                                                                                                                                                                                                                                                                                                                                                                                                                                                                                                                                                                                                                                                                                                                                                                                                                                                                                                                                                 |                        | Lighthouse Lab in Glasgow                                                                                | Wellcome Sanger Institute for the COVID-19 Genomics UK (COG-UK) Consortium         | Harper VanSteenhouse, Yumi Kasai, David Gray, Carol Clugston, Anna Dominiczak and Alex Alderton, Roberto Amato, Sonia Goncalves, Ewan Harrison, David K. Jackson, Ian Johnston, Dominic Kwiatkowski, Cordelia Langford, John Sillitoe on behalf of the Wellcome Sanger Institute COVID-19 Surveillance Team                                                                                                                                               |
| EPI_ISL_821106, EPI_ISL_821107, EPI_ISL_821109, EPI_ISL_821113, EPI_ISL_821114, EPI_ISL_821115, EPI_ISL_821116, EPI_ISL_821117, EPI_ISL_821118, EPI_ISL_821119, EPI_ISL_821120, EPI_ISL_821121, EPI_ISL_821122, EPI_ISL_821123, EPI_ISL_821124, EPI_ISL_821127, EPI_ISL_821129, EPI_ISL_821130, EPI_ISL_821133, EPI_ISL_821136, EPI_ISL_821137, EPI_ISL_821138, EPI_ISL_821139, EPI_ISL_821141, EPI_ISL_821144, EPI_ISL_821145, EPI_ISL_821146, EPI_ISL_821147, EPI_ISL_821148, EPI_ISL_821149                                                                                                                                                                                                                                                                                                                                                                                                                                                                                                                                                                                                                                                                                                                                                                                                                                                                                                                                                                                                                                                                                                                                                                                                                                                                                                                                                                                                                                                                                                                                                                                                                                                                                                                                                                                                                                                                                                                                                                                                                                                                                                                                                                                                                                                                                                                                                                                                                                                                                                                                                                                                                                                                                                                                                                                                                                                                                                                                                                                                                                                                                                                                                                                                                                                                                                                                                                                                                                                                                                 | see above              | Lighthouse Lab in Alderley Park                                                                          | Wellcome Sanger Institute for the COVID-19 Genomics UK (COG-UK) Consortium         | Jacquelyn Wynn, Mairead Hyland, The Lighthouse Lab in Alderley Park and Alex Alderton, Roberto Amato, Sonia Goncalves, Ewan Harrison, David K. Jackson, Ian Johnston, Dominic Kwiatkowski, Cordelia Langford, John Sillitoe on behalf of the Wellcome Sanger Institute COVID-19 Surveillance Team                                                                                                                                                         |
| EPI_ISL_821150                                                                                                                                                                                                                                                                                                                                                                                                                                                                                                                                                                                                                                                                                                                                                                                                                                                                                                                                                                                                                                                                                                                                                                                                                                                                                                                                                                                                                                                                                                                                                                                                                                                                                                                                                                                                                                                                                                                                                                                                                                                                                                                                                                                                                                                                                                                                                                                                                                                                                                                                                                                                                                                                                                                                                                                                                                                                                                                                                                                                                                                                                                                                                                                                                                                                                                                                                                                                                                                                                                                                                                                                                                                                                                                                                                                                                                                                                                                                                                                 |                        | Lighthouse Lab in Glasgow                                                                                | Wellcome Sanger Institute for the COVID-19 Genomics UK (COG-UK) Consortium         | Harper VanSteenhouse, Yumi Kasai, David Gray, Carol Clugston, Anna Dominiczak and Alex Alderton, Roberto Amato, Sonia Goncalves, Ewan Harrison, David K. Jackson, Ian Johnston, Dominic Kwiatkowski, Cordelia Langford, John Sillitoe on behalf of the Wellcome Sanger Institute COVID-19 Surveillance Team                                                                                                                                               |
| EPI_ISL_821151, EPI_ISL_821152, EPI_ISL_821154, EPI_ISL_821155,                                                                                                                                                                                                                                                                                                                                                                                                                                                                                                                                                                                                                                                                                                                                                                                                                                                                                                                                                                                                                                                                                                                                                                                                                                                                                                                                                                                                                                                                                                                                                                                                                                                                                                                                                                                                                                                                                                                                                                                                                                                                                                                                                                                                                                                                                                                                                                                                                                                                                                                                                                                                                                                                                                                                                                                                                                                                                                                                                                                                                                                                                                                                                                                                                                                                                                                                                                                                                                                                                                                                                                                                                                                                                                                                                                                                                                                                                                                                |                        | Lighthouse Lab in Alderley Park                                                                          | Wellcome Sanger Institute for the COVID-19 Genomics UK (COG-UK) Consortium         | Jacquelyn Wynn, Mairead Hyland, The Lighthouse Lab in Alderley Park and Alex Alderton, Roberto Amato, Sonia Goncalves, Ewan Harrison, David K. Jackson, Ian Johnston, Dominic Kwiatkowski, Cordelia Langford, John Sillitoe on behalf of the Wellcome Sanger Institute COVID-19 Surveillance Team                                                                                                                                                         |

[illegible]









|                                                                                                                                                                                                                                                                                                                                                                                                |                                                                         |                                                                            |                                                                                                                                                                                                                                                                                                                                                                          |
|------------------------------------------------------------------------------------------------------------------------------------------------------------------------------------------------------------------------------------------------------------------------------------------------------------------------------------------------------------------------------------------------|-------------------------------------------------------------------------|----------------------------------------------------------------------------|--------------------------------------------------------------------------------------------------------------------------------------------------------------------------------------------------------------------------------------------------------------------------------------------------------------------------------------------------------------------------|
| EPI_ISL_821987, EPI_ISL_821988, EPI_ISL_821992                                                                                                                                                                                                                                                                                                                                                 | Lighthouse Lab in Alderley Park                                         | Wellcome Sanger Institute for the COVID-19 Genomics UK (COG-UK) Consortium | Jacquelyn Wynn, Mairead Hyland, The Lighthouse Lab in Alderley Park and Alex Alderton, Roberto Amato, Sonia Goncalves, Ewan Harrison, David K. Jackson, Ian Johnston, Dominic Kwiatkowski, Cordelia Langford, John Sillitoe on behalf of the Wellcome Sanger Institute COVID-19 Surveillance Team                                                                        |
| EPI_ISL_821995                                                                                                                                                                                                                                                                                                                                                                                 | Lighthouse Lab in Glasgow                                               | Wellcome Sanger Institute for the COVID-19 Genomics UK (COG-UK) Consortium | Harper VanSteenhouse, Yumi Kasai, David Gray, Carol Clugston, Anna Dominiczak and Alex Alderton, Roberto Amato, Sonia Goncalves, Ewan Harrison, David K. Jackson, Ian Johnston, Dominic Kwiatkowski, Cordelia Langford, John Sillitoe on behalf of the Wellcome Sanger Institute COVID-19 Surveillance Team                                                              |
| EPI_ISL_821996, EPI_ISL_821997                                                                                                                                                                                                                                                                                                                                                                 | Lighthouse Lab in Alderley Park                                         | Wellcome Sanger Institute for the COVID-19 Genomics UK (COG-UK) Consortium | Jacquelyn Wynn, Mairead Hyland, The Lighthouse Lab in Alderley Park and Alex Alderton, Roberto Amato, Sonia Goncalves, Ewan Harrison, David K. Jackson, Ian Johnston, Dominic Kwiatkowski, Cordelia Langford, John Sillitoe on behalf of the Wellcome Sanger Institute COVID-19 Surveillance Team                                                                        |
| EPI_ISL_822004, EPI_ISL_822005, EPI_ISL_822006, EPI_ISL_822011                                                                                                                                                                                                                                                                                                                                 | Lighthouse Lab in Glasgow                                               | Wellcome Sanger Institute for the COVID-19 Genomics UK (COG-UK) Consortium | Harper VanSteenhouse, Yumi Kasai, David Gray, Carol Clugston, Anna Dominiczak and Alex Alderton, Roberto Amato, Sonia Goncalves, Ewan Harrison, David K. Jackson, Ian Johnston, Dominic Kwiatkowski, Cordelia Langford, John Sillitoe on behalf of the Wellcome Sanger Institute COVID-19 Surveillance Team                                                              |
| EPI_ISL_822019                                                                                                                                                                                                                                                                                                                                                                                 | Lighthouse Lab in Alderley Park                                         | Wellcome Sanger Institute for the COVID-19 Genomics UK (COG-UK) Consortium | Jacquelyn Wynn, Mairead Hyland, The Lighthouse Lab in Alderley Park and Alex Alderton, Roberto Amato, Sonia Goncalves, Ewan Harrison, David K. Jackson, Ian Johnston, Dominic Kwiatkowski, Cordelia Langford, John Sillitoe on behalf of the Wellcome Sanger Institute COVID-19 Surveillance Team                                                                        |
| EPI_ISL_822029                                                                                                                                                                                                                                                                                                                                                                                 | Lighthouse Lab in Glasgow                                               | Wellcome Sanger Institute for the COVID-19 Genomics UK (COG-UK) Consortium | Harper VanSteenhouse, Yumi Kasai, David Gray, Carol Clugston, Anna Dominiczak and Alex Alderton, Roberto Amato, Sonia Goncalves, Ewan Harrison, David K. Jackson, Ian Johnston, Dominic Kwiatkowski, Cordelia Langford, John Sillitoe on behalf of the Wellcome Sanger Institute COVID-19 Surveillance Team                                                              |
| EPI_ISL_822030                                                                                                                                                                                                                                                                                                                                                                                 | Lighthouse Lab in Alderley Park                                         | Wellcome Sanger Institute for the COVID-19 Genomics UK (COG-UK) Consortium | Jacquelyn Wynn, Mairead Hyland, The Lighthouse Lab in Alderley Park and Alex Alderton, Roberto Amato, Sonia Goncalves, Ewan Harrison, David K. Jackson, Ian Johnston, Dominic Kwiatkowski, Cordelia Langford, John Sillitoe on behalf of the Wellcome Sanger Institute COVID-19 Surveillance Team                                                                        |
| EPI_ISL_822033, EPI_ISL_822040, EPI_ISL_822041                                                                                                                                                                                                                                                                                                                                                 | Lighthouse Lab in Glasgow                                               | Wellcome Sanger Institute for the COVID-19 Genomics UK (COG-UK) Consortium | Harper VanSteenhouse, Yumi Kasai, David Gray, Carol Clugston, Anna Dominiczak and Alex Alderton, Roberto Amato, Sonia Goncalves, Ewan Harrison, David K. Jackson, Ian Johnston, Dominic Kwiatkowski, Cordelia Langford, John Sillitoe on behalf of the Wellcome Sanger Institute COVID-19 Surveillance Team                                                              |
| EPI_ISL_822047                                                                                                                                                                                                                                                                                                                                                                                 | Lighthouse Lab in Alderley Park                                         | Wellcome Sanger Institute for the COVID-19 Genomics UK (COG-UK) Consortium | Jacquelyn Wynn, Mairead Hyland, The Lighthouse Lab in Alderley Park and Alex Alderton, Roberto Amato, Sonia Goncalves, Ewan Harrison, David K. Jackson, Ian Johnston, Dominic Kwiatkowski, Cordelia Langford, John Sillitoe on behalf of the Wellcome Sanger Institute COVID-19 Surveillance Team                                                                        |
| EPI_ISL_822048                                                                                                                                                                                                                                                                                                                                                                                 | Lighthouse Lab in Glasgow                                               | Wellcome Sanger Institute for the COVID-19 Genomics UK (COG-UK) Consortium | Harper VanSteenhouse, Yumi Kasai, David Gray, Carol Clugston, Anna Dominiczak and Alex Alderton, Roberto Amato, Sonia Goncalves, Ewan Harrison, David K. Jackson, Ian Johnston, Dominic Kwiatkowski, Cordelia Langford, John Sillitoe on behalf of the Wellcome Sanger Institute COVID-19 Surveillance Team                                                              |
| EPI_ISL_822060                                                                                                                                                                                                                                                                                                                                                                                 | Lighthouse Lab in Alderley Park                                         | Wellcome Sanger Institute for the COVID-19 Genomics UK (COG-UK) Consortium | Jacquelyn Wynn, Mairead Hyland, The Lighthouse Lab in Alderley Park and Alex Alderton, Roberto Amato, Sonia Goncalves, Ewan Harrison, David K. Jackson, Ian Johnston, Dominic Kwiatkowski, Cordelia Langford, John Sillitoe on behalf of the Wellcome Sanger Institute COVID-19 Surveillance Team                                                                        |
| EPI_ISL_822063, EPI_ISL_822067, EPI_ISL_822075                                                                                                                                                                                                                                                                                                                                                 | Lighthouse Lab in Glasgow                                               | Wellcome Sanger Institute for the COVID-19 Genomics UK (COG-UK) Consortium | Harper VanSteenhouse, Yumi Kasai, David Gray, Carol Clugston, Anna Dominiczak and Alex Alderton, Roberto Amato, Sonia Goncalves, Ewan Harrison, David K. Jackson, Ian Johnston, Dominic Kwiatkowski, Cordelia Langford, John Sillitoe on behalf of the Wellcome Sanger Institute COVID-19 Surveillance Team                                                              |
| EPI_ISL_822081                                                                                                                                                                                                                                                                                                                                                                                 | Lighthouse Lab in Alderley Park                                         | Wellcome Sanger Institute for the COVID-19 Genomics UK (COG-UK) Consortium | Jacquelyn Wynn, Mairead Hyland, The Lighthouse Lab in Alderley Park and Alex Alderton, Roberto Amato, Sonia Goncalves, Ewan Harrison, David K. Jackson, Ian Johnston, Dominic Kwiatkowski, Cordelia Langford, John Sillitoe on behalf of the Wellcome Sanger Institute COVID-19 Surveillance Team                                                                        |
| EPI_ISL_822099                                                                                                                                                                                                                                                                                                                                                                                 | Lighthouse Lab in Glasgow                                               | Wellcome Sanger Institute for the COVID-19 Genomics UK (COG-UK) Consortium | Harper VanSteenhouse, Yumi Kasai, David Gray, Carol Clugston, Anna Dominiczak and Alex Alderton, Roberto Amato, Sonia Goncalves, Ewan Harrison, David K. Jackson, Ian Johnston, Dominic Kwiatkowski, Cordelia Langford, John Sillitoe on behalf of the Wellcome Sanger Institute COVID-19 Surveillance Team                                                              |
| EPI_ISL_822105                                                                                                                                                                                                                                                                                                                                                                                 | Lighthouse Lab in Alderley Park                                         | Wellcome Sanger Institute for the COVID-19 Genomics UK (COG-UK) Consortium | Jacquelyn Wynn, Mairead Hyland, The Lighthouse Lab in Alderley Park and Alex Alderton, Roberto Amato, Sonia Goncalves, Ewan Harrison, David K. Jackson, Ian Johnston, Dominic Kwiatkowski, Cordelia Langford, John Sillitoe on behalf of the Wellcome Sanger Institute COVID-19 Surveillance Team                                                                        |
| EPI_ISL_822117, EPI_ISL_822119, EPI_ISL_822127, EPI_ISL_822130                                                                                                                                                                                                                                                                                                                                 | Lighthouse Lab in Glasgow                                               | Wellcome Sanger Institute for the COVID-19 Genomics UK (COG-UK) Consortium | Harper VanSteenhouse, Yumi Kasai, David Gray, Carol Clugston, Anna Dominiczak and Alex Alderton, Roberto Amato, Sonia Goncalves, Ewan Harrison, David K. Jackson, Ian Johnston, Dominic Kwiatkowski, Cordelia Langford, John Sillitoe on behalf of the Wellcome Sanger Institute COVID-19 Surveillance Team                                                              |
| EPI_ISL_822139                                                                                                                                                                                                                                                                                                                                                                                 | Lighthouse Lab in Alderley Park                                         | Wellcome Sanger Institute for the COVID-19 Genomics UK (COG-UK) Consortium | Jacquelyn Wynn, Mairead Hyland, The Lighthouse Lab in Alderley Park and Alex Alderton, Roberto Amato, Sonia Goncalves, Ewan Harrison, David K. Jackson, Ian Johnston, Dominic Kwiatkowski, Cordelia Langford, John Sillitoe on behalf of the Wellcome Sanger Institute COVID-19 Surveillance Team                                                                        |
| EPI_ISL_822140                                                                                                                                                                                                                                                                                                                                                                                 | Lighthouse Lab in Glasgow                                               | Wellcome Sanger Institute for the COVID-19 Genomics UK (COG-UK) Consortium | Harper VanSteenhouse, Yumi Kasai, David Gray, Carol Clugston, Anna Dominiczak and Alex Alderton, Roberto Amato, Sonia Goncalves, Ewan Harrison, David K. Jackson, Ian Johnston, Dominic Kwiatkowski, Cordelia Langford, John Sillitoe on behalf of the Wellcome Sanger Institute COVID-19 Surveillance Team                                                              |
| EPI_ISL_822150                                                                                                                                                                                                                                                                                                                                                                                 | Lighthouse Lab in Alderley Park                                         | Wellcome Sanger Institute for the COVID-19 Genomics UK (COG-UK) Consortium | Jacquelyn Wynn, Mairead Hyland, The Lighthouse Lab in Alderley Park and Alex Alderton, Roberto Amato, Sonia Goncalves, Ewan Harrison, David K. Jackson, Ian Johnston, Dominic Kwiatkowski, Cordelia Langford, John Sillitoe on behalf of the Wellcome Sanger Institute COVID-19 Surveillance Team                                                                        |
| EPI_ISL_822153, EPI_ISL_822158, EPI_ISL_822165, EPI_ISL_822170, EPI_ISL_822178                                                                                                                                                                                                                                                                                                                 | Lighthouse Lab in Glasgow                                               | Wellcome Sanger Institute for the COVID-19 Genomics UK (COG-UK) Consortium | Harper VanSteenhouse, Yumi Kasai, David Gray, Carol Clugston, Anna Dominiczak and Alex Alderton, Roberto Amato, Sonia Goncalves, Ewan Harrison, David K. Jackson, Ian Johnston, Dominic Kwiatkowski, Cordelia Langford, John Sillitoe on behalf of the Wellcome Sanger Institute COVID-19 Surveillance Team                                                              |
| EPI_ISL_822183, EPI_ISL_822191, EPI_ISL_822193, EPI_ISL_822197, EPI_ISL_822199                                                                                                                                                                                                                                                                                                                 | Lighthouse Lab in Alderley Park                                         | Wellcome Sanger Institute for the COVID-19 Genomics UK (COG-UK) Consortium | Jacquelyn Wynn, Mairead Hyland, The Lighthouse Lab in Alderley Park and Alex Alderton, Roberto Amato, Sonia Goncalves, Ewan Harrison, David K. Jackson, Ian Johnston, Dominic Kwiatkowski, Cordelia Langford, John Sillitoe on behalf of the Wellcome Sanger Institute COVID-19 Surveillance Team                                                                        |
| EPI_ISL_822237, EPI_ISL_822242, EPI_ISL_822245, EPI_ISL_822256, EPI_ISL_822260, EPI_ISL_822264, EPI_ISL_822275, EPI_ISL_822288                                                                                                                                                                                                                                                                 | Lighthouse Lab in Glasgow                                               | Wellcome Sanger Institute for the COVID-19 Genomics UK (COG-UK) Consortium | Harper VanSteenhouse, Yumi Kasai, David Gray, Carol Clugston, Anna Dominiczak and Alex Alderton, Roberto Amato, Sonia Goncalves, Ewan Harrison, David K. Jackson, Ian Johnston, Dominic Kwiatkowski, Cordelia Langford, John Sillitoe on behalf of the Wellcome Sanger Institute COVID-19 Surveillance Team                                                              |
| EPI_ISL_822809, EPI_ISL_822811, EPI_ISL_822818, EPI_ISL_822821, EPI_ISL_822826, EPI_ISL_822827, EPI_ISL_822829                                                                                                                                                                                                                                                                                 | Wales Specialist Virology Centre Sequencing lab: Pathogen Genomics Unit | COVID-19 Genomics UK (COG-UK) Consortium                                   | Catherine Moore, Johnathan Evans, Laura Gifford, Malorie Perry, Simon Cottrell, Angela Marchbank, Alec Birchley, Alexander Adams, Amy Gaskin, Bree Gatica-Wilcox, Jason Coombes, Joel Southgate, Lauren Gilbert, Lee Graham, Nicole Pacchiarini, Sara Kumziene-Summerhayes, Sarah Taylor, Sophie Jones, Sara Rey, Matthew Bull, Joanne Watkins, Sally Corden, Tom Connor |
| EPI_ISL_824096, EPI_ISL_824097, EPI_ISL_824098, EPI_ISL_824099, EPI_ISL_824100, EPI_ISL_824141, EPI_ISL_824145, EPI_ISL_824146, EPI_ISL_824147, EPI_ISL_824148, EPI_ISL_824149, EPI_ISL_824150, EPI_ISL_824153, EPI_ISL_824154, EPI_ISL_824169, EPI_ISL_824209, EPI_ISL_824253, EPI_ISL_824254, EPI_ISL_824261, EPI_ISL_824263, EPI_ISL_824264, EPI_ISL_824267, EPI_ISL_824268, EPI_ISL_824270 |                                                                         |                                                                            |                                                                                                                                                                                                                                                                                                                                                                          |
| see above                                                                                                                                                                                                                                                                                                                                                                                      | Dutch COVID-19 response team                                            | National Institute for Public Health and the Environment (RIVM)            | Adam Meijer, Harry Vennema, Jeroen Cremer, Sharon van den Brink, Bas van der Veer, AnneMarie van den Brandt, Florian Zwagemaker, Dennis Schmitz, Chantal Reusken, on behalf of the national COVID-19 response team                                                                                                                                                       |
| EPI_ISL_824835, EPI_ISL_824836, EPI_ISL_824844, EPI_ISL_824850, EPI_ISL_824854, EPI_ISL_824856, EPI_ISL_824857, EPI_ISL_824860, EPI_ISL_824861, EPI_ISL_824862                                                                                                                                                                                                                                 | Department of Clinical Microbiology                                     | GIGA Medical Genomics                                                      | Keith Durkin, Maria Artesi, Sébastien Bontems, Raphaël Boreux, Bouchra Boujemla, Cécile Meex, Pierrette Melin, Marie-Pierre Hayette, Vincent Bours                                                                                                                                                                                                                       |
| EPI_ISL_824953, EPI_ISL_824954, EPI_ISL_824955, EPI_ISL_824956, EPI_ISL_824957, EPI_ISL_824958, EPI_ISL_824960, EPI_ISL_824961, EPI_ISL_824962, EPI_ISL_824963, EPI_ISL_824964, EPI_ISL_824965, EPI_ISL_824967, EPI_ISL_824968, EPI_ISL_824969, EPI_ISL_824970, EPI_ISL_824971, EPI_ISL_824972, EPI_ISL_824973, EPI_ISL_824975, EPI_ISL_824976, EPI_ISL_824977, EPI_ISL_824978                 |                                                                         |                                                                            |                                                                                                                                                                                                                                                                                                                                                                          |
| see above                                                                                                                                                                                                                                                                                                                                                                                      | Maryland Public Health Laboratory                                       | Maryland Public Health Laboratory                                          | Maryland Department of Health Laboratories Administration                                                                                                                                                                                                                                                                                                                |

|                                                                                                                                                                                                                                                                                                                                                                                                                                                                                                                                                                                                                                                                                                                                                |                                                                                                                |                                                                                                  |                                                                                                                                                                                                                                                                                                                                                                                                                                                                                                                                                                                                                                                                                                                                                                                                                                    |
|------------------------------------------------------------------------------------------------------------------------------------------------------------------------------------------------------------------------------------------------------------------------------------------------------------------------------------------------------------------------------------------------------------------------------------------------------------------------------------------------------------------------------------------------------------------------------------------------------------------------------------------------------------------------------------------------------------------------------------------------|----------------------------------------------------------------------------------------------------------------|--------------------------------------------------------------------------------------------------|------------------------------------------------------------------------------------------------------------------------------------------------------------------------------------------------------------------------------------------------------------------------------------------------------------------------------------------------------------------------------------------------------------------------------------------------------------------------------------------------------------------------------------------------------------------------------------------------------------------------------------------------------------------------------------------------------------------------------------------------------------------------------------------------------------------------------------|
| EPI_ISL_824985, EPI_ISL_824986                                                                                                                                                                                                                                                                                                                                                                                                                                                                                                                                                                                                                                                                                                                 | Charité Universitätsmedizin Berlin, Institute of Virology, Charitéplatz 1, 10117 Berlin, Germany               | Charité Universitätsmedizin Berlin, Institute of Virology, Charitéplatz 1, 10117 Berlin, Germany | Victor M Corman, Jörn Beheim-Schwarzbach, Tobias Bleicker, Julia Tesch, Barbara Mühlemann, Talitha Veith, Julia Schneider, Terry Jones, Christian Drosten                                                                                                                                                                                                                                                                                                                                                                                                                                                                                                                                                                                                                                                                          |
| EPI_ISL_826466                                                                                                                                                                                                                                                                                                                                                                                                                                                                                                                                                                                                                                                                                                                                 | Lighthouse Lab in Milton Keynes                                                                                | Wellcome Sanger Institute for the COVID-19 Genomics UK (COG-UK) Consortium                       | The Lighthouse Lab in Milton Keynes and Alex Alderton, Roberto Amato, Sonia Goncalves, Ewan Harrison, David K. Jackson, Ian Johnston, Dominic Kwiatkowski, Cordelia Langford, John Sillitoe on behalf of the Wellcome Sanger Institute COVID-19 Surveillance Team                                                                                                                                                                                                                                                                                                                                                                                                                                                                                                                                                                  |
| EPI_ISL_826467, EPI_ISL_826468, EPI_ISL_826469, EPI_ISL_826474                                                                                                                                                                                                                                                                                                                                                                                                                                                                                                                                                                                                                                                                                 | Lighthouse Lab in Alderley Park                                                                                | Wellcome Sanger Institute for the COVID-19 Genomics UK (COG-UK) Consortium                       | Jacquelyn Wynn, Mairead Hyland, The Lighthouse Lab in Alderley Park and Alex Alderton, Roberto Amato, Sonia Goncalves, Ewan Harrison, David K. Jackson, Ian Johnston, Dominic Kwiatkowski, Cordelia Langford, John Sillitoe on behalf of the Wellcome Sanger Institute COVID-19 Surveillance Team                                                                                                                                                                                                                                                                                                                                                                                                                                                                                                                                  |
| EPI_ISL_826731, EPI_ISL_826896, EPI_ISL_826918, EPI_ISL_827041, EPI_ISL_827044, EPI_ISL_827120                                                                                                                                                                                                                                                                                                                                                                                                                                                                                                                                                                                                                                                 | deCODE genetics                                                                                                | deCODE genetics                                                                                  | Daniel F Gudbjartsson; Agnar Helgason; Hakon Jonsson; Olafur T Magnusson; Pall Melsted; Gudmundur L Norddahl; Jona Saemundsdottir; Asgeir Sigurdsson; Patrick Sulem; Arna B Agustsdottir; Hannes Eggertsson; Berglind Eiríksdóttir; Run Fridríksdóttir; Elisabet E Gardarsdóttir; Gudmundur Georgsson; Olafía S Gretarsdóttir; Kjartan R Gudmundsson; Thora R Gunnarsdóttir; Arnaldur Gylfason; Hilma Holm; Brynjar O Jensson; Aslaug Jonasdóttir; Kamilla S Josefsdóttir; Thordur Kristjánsson; Droplaug N Magnúsdóttir; Solvi Rognvaldsson; Louise le Roux; Gudrun Sigmundsdóttir; Gardar Sveinbjörnsson; Kristín E Sveinsdóttir; Maney Sveinsdóttir; Emil A Thorarensen; Bjarni Thorbjörnsson; Gisli Masson; Ingileif Jónsdóttir; Alma Möller; Thorolfur Gudnason; Karl G Kristinnsson; Unnur Thorsteinsdóttir; Kari Stefánsson |
| EPI_ISL_827396                                                                                                                                                                                                                                                                                                                                                                                                                                                                                                                                                                                                                                                                                                                                 | The National University Hospital of Iceland                                                                    | deCODE genetics                                                                                  | Daniel F Gudbjartsson; Agnar Helgason; Hakon Jonsson; Olafur T Magnusson; Pall Melsted; Gudmundur L Norddahl; Jona Saemundsdottir; Asgeir Sigurdsson; Patrick Sulem; Arna B Agustsdottir; Hannes Eggertsson; Berglind Eiríksdóttir; Run Fridríksdóttir; Elisabet E Gardarsdóttir; Gudmundur Georgsson; Olafía S Gretarsdóttir; Kjartan R Gudmundsson; Thora R Gunnarsdóttir; Arnaldur Gylfason; Hilma Holm; Brynjar O Jensson; Aslaug Jonasdóttir; Kamilla S Josefsdóttir; Thordur Kristjánsson; Droplaug N Magnúsdóttir; Solvi Rognvaldsson; Louise le Roux; Gudrun Sigmundsdóttir; Gardar Sveinbjörnsson; Kristín E Sveinsdóttir; Maney Sveinsdóttir; Emil A Thorarensen; Bjarni Thorbjörnsson; Gisli Masson; Ingileif Jónsdóttir; Alma Möller; Thorolfur Gudnason; Karl G Kristinnsson; Unnur Thorsteinsdóttir; Kari Stefánsson |
| EPI_ISL_827416, EPI_ISL_827546, EPI_ISL_827689, EPI_ISL_827690, EPI_ISL_827757, EPI_ISL_827871, EPI_ISL_827897, EPI_ISL_827921, EPI_ISL_827923, EPI_ISL_827925, EPI_ISL_827930, EPI_ISL_827931, EPI_ISL_827933, EPI_ISL_827951, EPI_ISL_827992, EPI_ISL_828255, EPI_ISL_828256, EPI_ISL_828262, EPI_ISL_828497, EPI_ISL_828785, EPI_ISL_828873, EPI_ISL_829062, EPI_ISL_829080, EPI_ISL_829323, EPI_ISL_829325, EPI_ISL_829703, EPI_ISL_829972, EPI_ISL_829977, EPI_ISL_829982, EPI_ISL_830186, EPI_ISL_830194                                                                                                                                                                                                                                 | deCODE genetics                                                                                                | deCODE genetics                                                                                  | Daniel F Gudbjartsson; Agnar Helgason; Hakon Jonsson; Olafur T Magnusson; Pall Melsted; Gudmundur L Norddahl; Jona Saemundsdottir; Asgeir Sigurdsson; Patrick Sulem; Arna B Agustsdottir; Hannes Eggertsson; Berglind Eiríksdóttir; Run Fridríksdóttir; Elisabet E Gardarsdóttir; Gudmundur Georgsson; Olafía S Gretarsdóttir; Kjartan R Gudmundsson; Thora R Gunnarsdóttir; Arnaldur Gylfason; Hilma Holm; Brynjar O Jensson; Aslaug Jonasdóttir; Kamilla S Josefsdóttir; Thordur Kristjánsson; Droplaug N Magnúsdóttir; Solvi Rognvaldsson; Louise le Roux; Gudrun Sigmundsdóttir; Gardar Sveinbjörnsson; Kristín E Sveinsdóttir; Maney Sveinsdóttir; Emil A Thorarensen; Bjarni Thorbjörnsson; Gisli Masson; Ingileif Jónsdóttir; Alma Möller; Thorolfur Gudnason; Karl G Kristinnsson; Unnur Thorsteinsdóttir; Kari Stefánsson |
| see above                                                                                                                                                                                                                                                                                                                                                                                                                                                                                                                                                                                                                                                                                                                                      | deCODE genetics                                                                                                | deCODE genetics                                                                                  | Daniel F Gudbjartsson; Agnar Helgason; Hakon Jonsson; Olafur T Magnusson; Pall Melsted; Gudmundur L Norddahl; Jona Saemundsdottir; Asgeir Sigurdsson; Patrick Sulem; Arna B Agustsdottir; Hannes Eggertsson; Berglind Eiríksdóttir; Run Fridríksdóttir; Elisabet E Gardarsdóttir; Gudmundur Georgsson; Olafía S Gretarsdóttir; Kjartan R Gudmundsson; Thora R Gunnarsdóttir; Arnaldur Gylfason; Hilma Holm; Brynjar O Jensson; Aslaug Jonasdóttir; Kamilla S Josefsdóttir; Thordur Kristjánsson; Droplaug N Magnúsdóttir; Solvi Rognvaldsson; Louise le Roux; Gudrun Sigmundsdóttir; Gardar Sveinbjörnsson; Kristín E Sveinsdóttir; Maney Sveinsdóttir; Emil A Thorarensen; Bjarni Thorbjörnsson; Gisli Masson; Ingileif Jónsdóttir; Alma Möller; Thorolfur Gudnason; Karl G Kristinnsson; Unnur Thorsteinsdóttir; Kari Stefánsson |
| EPI_ISL_830246, EPI_ISL_830248, EPI_ISL_830250, EPI_ISL_830252, EPI_ISL_830253, EPI_ISL_830257, EPI_ISL_830263, EPI_ISL_830265, EPI_ISL_830267, EPI_ISL_830269, EPI_ISL_830272                                                                                                                                                                                                                                                                                                                                                                                                                                                                                                                                                                 | Wadsworth Center, New York State Department of Health                                                          | Wadsworth Center, New York State Department of Health                                            | Kirsten St. George, Daryl M. Lamson, Alexis Russel, Matthew Shudt, Melissa A Leisner, Jonathan Plitnick, Navjot Singh, John Kelly, Erasmus Schneider, Erica Lasek-Nesselquist                                                                                                                                                                                                                                                                                                                                                                                                                                                                                                                                                                                                                                                      |
| EPI_ISL_830318                                                                                                                                                                                                                                                                                                                                                                                                                                                                                                                                                                                                                                                                                                                                 | deCODE genetics                                                                                                | deCODE genetics                                                                                  | Daniel F Gudbjartsson; Agnar Helgason; Hakon Jonsson; Olafur T Magnusson; Pall Melsted; Gudmundur L Norddahl; Jona Saemundsdottir; Asgeir Sigurdsson; Patrick Sulem; Arna B Agustsdottir; Hannes Eggertsson; Berglind Eiríksdóttir; Run Fridríksdóttir; Elisabet E Gardarsdóttir; Gudmundur Georgsson; Olafía S Gretarsdóttir; Kjartan R Gudmundsson; Thora R Gunnarsdóttir; Arnaldur Gylfason; Hilma Holm; Brynjar O Jensson; Aslaug Jonasdóttir; Kamilla S Josefsdóttir; Thordur Kristjánsson; Droplaug N Magnúsdóttir; Solvi Rognvaldsson; Louise le Roux; Gudrun Sigmundsdóttir; Gardar Sveinbjörnsson; Kristín E Sveinsdóttir; Maney Sveinsdóttir; Emil A Thorarensen; Bjarni Thorbjörnsson; Gisli Masson; Ingileif Jónsdóttir; Alma Möller; Thorolfur Gudnason; Karl G Kristinnsson; Unnur Thorsteinsdóttir; Kari Stefánsson |
| EPI_ISL_830572, EPI_ISL_830630, EPI_ISL_830633, EPI_ISL_830638, EPI_ISL_830641                                                                                                                                                                                                                                                                                                                                                                                                                                                                                                                                                                                                                                                                 | NORTHWELL HEALTH LABORATORIES                                                                                  | Wadsworth Center, New York State Department of Health                                            | Kirsten St. George, Daryl M. Lamson, Alexis Russel, Matthew Shudt, Melissa A Leisner, Jonathan Plitnick, Navjot Singh, John Kelly, Erasmus Schneider, Erica Lasek-Nesselquist                                                                                                                                                                                                                                                                                                                                                                                                                                                                                                                                                                                                                                                      |
| EPI_ISL_830684, EPI_ISL_830687, EPI_ISL_830688, EPI_ISL_830689, EPI_ISL_830691, EPI_ISL_830692, EPI_ISL_830693, EPI_ISL_830694, EPI_ISL_830696, EPI_ISL_830697, EPI_ISL_830700, EPI_ISL_830703, EPI_ISL_830706, EPI_ISL_830707, EPI_ISL_830708, EPI_ISL_830710, EPI_ISL_830711, EPI_ISL_830712, EPI_ISL_830713, EPI_ISL_830714, EPI_ISL_830716, EPI_ISL_830717, EPI_ISL_830718, EPI_ISL_830719                                                                                                                                                                                                                                                                                                                                                 | ALBANY MEDICAL CENTER HOSPITAL CLINICAL LABORATORIES                                                           | Wadsworth Center, New York State Department of Health                                            | Kirsten St. George, Daryl M. Lamson, Alexis Russel, Matthew Shudt, Melissa A Leisner, Jonathan Plitnick, Navjot Singh, John Kelly, Erasmus Schneider, Erica Lasek-Nesselquist                                                                                                                                                                                                                                                                                                                                                                                                                                                                                                                                                                                                                                                      |
| see above                                                                                                                                                                                                                                                                                                                                                                                                                                                                                                                                                                                                                                                                                                                                      | ALBANY MEDICAL CENTER HOSPITAL CLINICAL LABORATORIES                                                           | Wadsworth Center, New York State Department of Health                                            | Kirsten St. George, Daryl M. Lamson, Alexis Russel, Matthew Shudt, Melissa A Leisner, Jonathan Plitnick, Navjot Singh, John Kelly, Erasmus Schneider, Erica Lasek-Nesselquist                                                                                                                                                                                                                                                                                                                                                                                                                                                                                                                                                                                                                                                      |
| EPI_ISL_831366, EPI_ISL_831367                                                                                                                                                                                                                                                                                                                                                                                                                                                                                                                                                                                                                                                                                                                 | Clinical Molecular Microbiology Laboratory, UNC Hospitals                                                      | Jeremy Wang                                                                                      | Jeremy Wang, Alexander Rubinsteyn, Colleen Rice, Jason Smedberg, Melissa Miller, Corbin Jones, Robert Hagan                                                                                                                                                                                                                                                                                                                                                                                                                                                                                                                                                                                                                                                                                                                        |
| EPI_ISL_831488, EPI_ISL_831493, EPI_ISL_831497, EPI_ISL_831534, EPI_ISL_831553, EPI_ISL_831554, EPI_ISL_831555, EPI_ISL_831558, EPI_ISL_831559, EPI_ISL_831560, EPI_ISL_831561, EPI_ISL_831562, EPI_ISL_831563, EPI_ISL_831564, EPI_ISL_831565, EPI_ISL_831567, EPI_ISL_831568, EPI_ISL_831571, EPI_ISL_831574, EPI_ISL_831591, EPI_ISL_831592, EPI_ISL_831594, EPI_ISL_831595, EPI_ISL_831596, EPI_ISL_831597, EPI_ISL_831602, EPI_ISL_831607, EPI_ISL_831609, EPI_ISL_831610, EPI_ISL_831612, EPI_ISL_831613, EPI_ISL_831614, EPI_ISL_831618, EPI_ISL_831619, EPI_ISL_831622, EPI_ISL_831623, EPI_ISL_831624, EPI_ISL_831625, EPI_ISL_831626, EPI_ISL_831632, EPI_ISL_831633, EPI_ISL_831634, EPI_ISL_831636, EPI_ISL_831637, EPI_ISL_831638 | University of Wisconsin-Madison AIDS Vaccine Research Laboratories                                             | Gage Moreno, Katarina Braun, et al. AIDS Vaccine Research Laboratories                           |                                                                                                                                                                                                                                                                                                                                                                                                                                                                                                                                                                                                                                                                                                                                                                                                                                    |
| see above                                                                                                                                                                                                                                                                                                                                                                                                                                                                                                                                                                                                                                                                                                                                      | University of Wisconsin-Madison AIDS Vaccine Research Laboratories                                             | University of Wisconsin-Madison AIDS Vaccine Research Laboratories                               | Gage Moreno, Katarina Braun, et al. AIDS Vaccine Research Laboratories                                                                                                                                                                                                                                                                                                                                                                                                                                                                                                                                                                                                                                                                                                                                                             |
| EPI_ISL_831671                                                                                                                                                                                                                                                                                                                                                                                                                                                                                                                                                                                                                                                                                                                                 | Institute of Virology, Biomedical Research Center of the Slovak Academy of Sciences, Bratislava                | Faculty of Natural Sciences, Comenius University, Bratislava                                     | Broa Brejová, Viktória abanová, Kristína Boršová, Viktória Hodorová, Sabina Fumaová Havlíková, Juraj Kopáek, Martina Liková, ubomíra Lukáiková, Martina Neboháová, Monika Sláviková, Tomáš Vína, Jozef Nosek, Boris Klempa                                                                                                                                                                                                                                                                                                                                                                                                                                                                                                                                                                                                         |
| EPI_ISL_831673                                                                                                                                                                                                                                                                                                                                                                                                                                                                                                                                                                                                                                                                                                                                 | Institute of Virology, Biomedical Research Center of the Slovak Academy of Sciences, Bratislava                | Faculty of Natural Sciences, Comenius University, Bratislava                                     | Kristína Boršová, Viktória abanová, Broa Brejová, Viktória Hodorová, Sabina Fumaová Havlíková, Juraj Kopáek, Martina Liková, ubomíra Lukáiková, Martina Neboháová, Monika Sláviková, Tomáš Vína, Boris Klempa, Jozef Nosek                                                                                                                                                                                                                                                                                                                                                                                                                                                                                                                                                                                                         |
| EPI_ISL_831942                                                                                                                                                                                                                                                                                                                                                                                                                                                                                                                                                                                                                                                                                                                                 | Klinisk mikrobiologi                                                                                           | The Public Health Agency of Sweden                                                               | Department of Microbiology, The Public Health Agency of Sweden                                                                                                                                                                                                                                                                                                                                                                                                                                                                                                                                                                                                                                                                                                                                                                     |
| EPI_ISL_831943                                                                                                                                                                                                                                                                                                                                                                                                                                                                                                                                                                                                                                                                                                                                 | Unilabs, Mikrobiologiska laborietet                                                                            | The Public Health Agency of Sweden                                                               | Department of Microbiology, The Public Health Agency of Sweden                                                                                                                                                                                                                                                                                                                                                                                                                                                                                                                                                                                                                                                                                                                                                                     |
| EPI_ISL_832003, EPI_ISL_832004                                                                                                                                                                                                                                                                                                                                                                                                                                                                                                                                                                                                                                                                                                                 | Mikrobiologen                                                                                                  | The Public Health Agency of Sweden                                                               | Department of Microbiology, The Public Health Agency of Sweden                                                                                                                                                                                                                                                                                                                                                                                                                                                                                                                                                                                                                                                                                                                                                                     |
| EPI_ISL_832005                                                                                                                                                                                                                                                                                                                                                                                                                                                                                                                                                                                                                                                                                                                                 | Klinisk Mikrobiologi                                                                                           | The Public Health Agency of Sweden                                                               | Department of Microbiology, The Public Health Agency of Sweden                                                                                                                                                                                                                                                                                                                                                                                                                                                                                                                                                                                                                                                                                                                                                                     |
| EPI_ISL_832006, EPI_ISL_832007                                                                                                                                                                                                                                                                                                                                                                                                                                                                                                                                                                                                                                                                                                                 | Unilabs AB Skovde                                                                                              | The Public Health Agency of Sweden                                                               | Department of Microbiology, The Public Health Agency of Sweden                                                                                                                                                                                                                                                                                                                                                                                                                                                                                                                                                                                                                                                                                                                                                                     |
| EPI_ISL_832121, EPI_ISL_832122, EPI_ISL_832123, EPI_ISL_832124                                                                                                                                                                                                                                                                                                                                                                                                                                                                                                                                                                                                                                                                                 | Clinical Molecular Microbiology Laboratory, UNC Hospitals                                                      | Jeremy Wang                                                                                      | Jeremy Wang, Alexander Rubinsteyn, Colleen Rice, Jason Smedberg, Melissa Miller, Corbin Jones, Robert Hagan                                                                                                                                                                                                                                                                                                                                                                                                                                                                                                                                                                                                                                                                                                                        |
| EPI_ISL_832242                                                                                                                                                                                                                                                                                                                                                                                                                                                                                                                                                                                                                                                                                                                                 | Department of Clinical Microbiology                                                                            | GIGA Medical Genomics                                                                            | Keith Durkin, Maria Artesi, Sébastien Bontems, Raphaël Boreux, Bouchra Boujemla, Cécile Meex, Pierrette Melin, Marie-Pierre Hayette, Vincent Bours                                                                                                                                                                                                                                                                                                                                                                                                                                                                                                                                                                                                                                                                                 |
| EPI_ISL_832851, EPI_ISL_832871, EPI_ISL_832872, EPI_ISL_832876, EPI_ISL_832878, EPI_ISL_832879, EPI_ISL_832881, EPI_ISL_832882, EPI_ISL_832883, EPI_ISL_832884, EPI_ISL_832913, EPI_ISL_832945, EPI_ISL_832978, EPI_ISL_832979, EPI_ISL_832980, EPI_ISL_832981, EPI_ISL_832982, EPI_ISL_832983, EPI_ISL_832984, EPI_ISL_833029, EPI_ISL_833036, EPI_ISL_833037                                                                                                                                                                                                                                                                                                                                                                                 | Defence Services Medical Research Center, Biological Research Laboratory                                       | Defence Services Medical Research Center, Biological Research Laboratory                         | Khine Zaw Oo, Nay Myo Aung, Ko Ko Win, Phyo Kyaw Aung, Zaw Win Htun, Sat Paing Htoo, Kyaw Wanna, Thein Zaw, Kyee Myint, Ko Ko Lwin                                                                                                                                                                                                                                                                                                                                                                                                                                                                                                                                                                                                                                                                                                 |
| see above                                                                                                                                                                                                                                                                                                                                                                                                                                                                                                                                                                                                                                                                                                                                      | Maine HETL                                                                                                     | Tewhey Lab, The Jackson Laboratory                                                               | Matluk,N., Dewey,H., Isoue,F., Barter,M., Lynch,R., Munger,H. and Tewhey,R.                                                                                                                                                                                                                                                                                                                                                                                                                                                                                                                                                                                                                                                                                                                                                        |
| EPI_ISL_833041                                                                                                                                                                                                                                                                                                                                                                                                                                                                                                                                                                                                                                                                                                                                 | Defence Services Medical Research Center, Biological Research Laboratory                                       | Defence Services Medical Research Center, Biological Research Laboratory                         | Khine Zaw Oo, Nay Myo Aung, Ko Ko Win, Phyo Kyaw Aung, Zaw Win Htun, Sat Paing Htoo, Kyaw Wanna, Thein Zaw, Kyee Myint, Ko Ko Lwin                                                                                                                                                                                                                                                                                                                                                                                                                                                                                                                                                                                                                                                                                                 |
| EPI_ISL_833208, EPI_ISL_833213, EPI_ISL_833221, EPI_ISL_833223, EPI_ISL_833225                                                                                                                                                                                                                                                                                                                                                                                                                                                                                                                                                                                                                                                                 | Department of Virology and Immunology, University of Helsinki and Helsinki University Hospital, Huslab Finland | Department of Virology, Faculty of Medicine, University of Helsinki, Helsinki, Finland           | Teemu Smura, Ravi Kant, Phuoc Truong, Hussein Alburkat, Hannimari Kallio-Kokko, Jenni Virtanen, Maija Suvanto, Fathiah Zakham, Essi Korhonen, Sari Hannula, Harri Kangas, Pekka Ellonen, Olli Vapalahti                                                                                                                                                                                                                                                                                                                                                                                                                                                                                                                                                                                                                            |
| EPI_ISL_833345, EPI_ISL_833346, EPI_ISL_833347, EPI_ISL_833348, EPI_ISL_833349, EPI_ISL_833350, EPI_ISL_833351, EPI_ISL_833352, EPI_ISL_833353, EPI_ISL_833354, EPI_ISL_833355                                                                                                                                                                                                                                                                                                                                                                                                                                                                                                                                                                 | Microbiology Division, South Carolina Department of Health and Environmental Control (SC DHEC)                 | Microbiology Division, South Carolina Department of Health and Environmental Control (SC DHEC)   | Flores,H., Freeman,J.                                                                                                                                                                                                                                                                                                                                                                                                                                                                                                                                                                                                                                                                                                                                                                                                              |
| EPI_ISL_833376                                                                                                                                                                                                                                                                                                                                                                                                                                                                                                                                                                                                                                                                                                                                 | National Public Health Laboratory, National Centre for                                                         | National Public Health Laboratory, National Centre for                                           | Tze Minn Mak, Sophie Octavia, Zhenyang Zhou, Lin Cui, Raymond Tzer Pin Lin                                                                                                                                                                                                                                                                                                                                                                                                                                                                                                                                                                                                                                                                                                                                                         |











[illegible]

[illegible]













|                                                                                                                                                                                                                                                                                                                                                                                                                                                                                                                                                                                                                                                                                                                                                                                                                                                                                                                                                                                                                                                                                                                                                                                                                                                                                                                                                                                                                                                                                                                |                                                                                                  |                                                                                                  |                                                                                                                                                                                                                                                                                                             |
|----------------------------------------------------------------------------------------------------------------------------------------------------------------------------------------------------------------------------------------------------------------------------------------------------------------------------------------------------------------------------------------------------------------------------------------------------------------------------------------------------------------------------------------------------------------------------------------------------------------------------------------------------------------------------------------------------------------------------------------------------------------------------------------------------------------------------------------------------------------------------------------------------------------------------------------------------------------------------------------------------------------------------------------------------------------------------------------------------------------------------------------------------------------------------------------------------------------------------------------------------------------------------------------------------------------------------------------------------------------------------------------------------------------------------------------------------------------------------------------------------------------|--------------------------------------------------------------------------------------------------|--------------------------------------------------------------------------------------------------|-------------------------------------------------------------------------------------------------------------------------------------------------------------------------------------------------------------------------------------------------------------------------------------------------------------|
| EPI_ISL_858393                                                                                                                                                                                                                                                                                                                                                                                                                                                                                                                                                                                                                                                                                                                                                                                                                                                                                                                                                                                                                                                                                                                                                                                                                                                                                                                                                                                                                                                                                                 | Lighthouse Lab in Alderley Park                                                                  | Wellcome Sanger Institute for the COVID-19 Genomics UK (COG-UK) Consortium                       | Jacquelyn Wynn, Mairead Hyland, The Lighthouse Lab in Alderley Park and Alex Alderton, Roberto Amato, Sonia Goncalves, Ewan Harrison, David K. Jackson, Ian Johnston, Dominic Kwiatkowski, Cordelia Langford, John Sillitoe on behalf of the Wellcome Sanger Institute COVID-19 Surveillance Team           |
| EPI_ISL_858394, EPI_ISL_858395, EPI_ISL_858396, EPI_ISL_858399                                                                                                                                                                                                                                                                                                                                                                                                                                                                                                                                                                                                                                                                                                                                                                                                                                                                                                                                                                                                                                                                                                                                                                                                                                                                                                                                                                                                                                                 | Lighthouse Lab in Glasgow                                                                        | Wellcome Sanger Institute for the COVID-19 Genomics UK (COG-UK) Consortium                       | Harper VanSteenhouse, Yumi Kasai, David Gray, Carol Clugston, Anna Dominiczak and Alex Alderton, Roberto Amato, Sonia Goncalves, Ewan Harrison, David K. Jackson, Ian Johnston, Dominic Kwiatkowski, Cordelia Langford, John Sillitoe on behalf of the Wellcome Sanger Institute COVID-19 Surveillance Team |
| EPI_ISL_858400                                                                                                                                                                                                                                                                                                                                                                                                                                                                                                                                                                                                                                                                                                                                                                                                                                                                                                                                                                                                                                                                                                                                                                                                                                                                                                                                                                                                                                                                                                 | Lighthouse Lab in Alderley Park                                                                  | Wellcome Sanger Institute for the COVID-19 Genomics UK (COG-UK) Consortium                       | Jacquelyn Wynn, Mairead Hyland, The Lighthouse Lab in Alderley Park and Alex Alderton, Roberto Amato, Sonia Goncalves, Ewan Harrison, David K. Jackson, Ian Johnston, Dominic Kwiatkowski, Cordelia Langford, John Sillitoe on behalf of the Wellcome Sanger Institute COVID-19 Surveillance Team           |
| EPI_ISL_858402                                                                                                                                                                                                                                                                                                                                                                                                                                                                                                                                                                                                                                                                                                                                                                                                                                                                                                                                                                                                                                                                                                                                                                                                                                                                                                                                                                                                                                                                                                 | Lighthouse Lab in Glasgow                                                                        | Wellcome Sanger Institute for the COVID-19 Genomics UK (COG-UK) Consortium                       | Harper VanSteenhouse, Yumi Kasai, David Gray, Carol Clugston, Anna Dominiczak and Alex Alderton, Roberto Amato, Sonia Goncalves, Ewan Harrison, David K. Jackson, Ian Johnston, Dominic Kwiatkowski, Cordelia Langford, John Sillitoe on behalf of the Wellcome Sanger Institute COVID-19 Surveillance Team |
| EPI_ISL_858403                                                                                                                                                                                                                                                                                                                                                                                                                                                                                                                                                                                                                                                                                                                                                                                                                                                                                                                                                                                                                                                                                                                                                                                                                                                                                                                                                                                                                                                                                                 | Lighthouse Lab in Alderley Park                                                                  | Wellcome Sanger Institute for the COVID-19 Genomics UK (COG-UK) Consortium                       | Jacquelyn Wynn, Mairead Hyland, The Lighthouse Lab in Alderley Park and Alex Alderton, Roberto Amato, Sonia Goncalves, Ewan Harrison, David K. Jackson, Ian Johnston, Dominic Kwiatkowski, Cordelia Langford, John Sillitoe on behalf of the Wellcome Sanger Institute COVID-19 Surveillance Team           |
| EPI_ISL_858404, EPI_ISL_858406, EPI_ISL_858425, EPI_ISL_858426, EPI_ISL_858428, EPI_ISL_858429, EPI_ISL_858431, EPI_ISL_858432, EPI_ISL_858433, EPI_ISL_858435, EPI_ISL_858439, EPI_ISL_858441, EPI_ISL_858443, EPI_ISL_858445, EPI_ISL_858447, EPI_ISL_858448, EPI_ISL_858449, EPI_ISL_858450, EPI_ISL_858452, EPI_ISL_858453, EPI_ISL_858454, EPI_ISL_858456, EPI_ISL_858458, EPI_ISL_858459, EPI_ISL_858462, EPI_ISL_858463, EPI_ISL_858464, EPI_ISL_858466, EPI_ISL_858467, EPI_ISL_858469, EPI_ISL_858470, EPI_ISL_858473, EPI_ISL_858474, EPI_ISL_858475, EPI_ISL_858476, EPI_ISL_858478, EPI_ISL_858479, EPI_ISL_858480, EPI_ISL_858481, EPI_ISL_858488, EPI_ISL_858490, EPI_ISL_858493, EPI_ISL_858494, EPI_ISL_858495, EPI_ISL_858498, EPI_ISL_858499, EPI_ISL_858500, EPI_ISL_858502, EPI_ISL_858503, EPI_ISL_858504, EPI_ISL_858505, EPI_ISL_858506, EPI_ISL_858507, EPI_ISL_858508, EPI_ISL_858509, EPI_ISL_858510, EPI_ISL_858512, EPI_ISL_858513, EPI_ISL_858514, EPI_ISL_858515, EPI_ISL_858518, EPI_ISL_858519, EPI_ISL_858520, EPI_ISL_858522, EPI_ISL_858524, EPI_ISL_858525, EPI_ISL_858526, EPI_ISL_858528, EPI_ISL_858534, EPI_ISL_858536, EPI_ISL_858539, EPI_ISL_858540, EPI_ISL_858541, EPI_ISL_858542, EPI_ISL_858543, EPI_ISL_858544, EPI_ISL_858547, EPI_ISL_858548, EPI_ISL_858550, EPI_ISL_858551, EPI_ISL_858552, EPI_ISL_858553, EPI_ISL_858555, EPI_ISL_858556, EPI_ISL_858558, EPI_ISL_858561, EPI_ISL_858562, EPI_ISL_858564, EPI_ISL_858567, EPI_ISL_858568, EPI_ISL_858571 |                                                                                                  |                                                                                                  |                                                                                                                                                                                                                                                                                                             |
| see above                                                                                                                                                                                                                                                                                                                                                                                                                                                                                                                                                                                                                                                                                                                                                                                                                                                                                                                                                                                                                                                                                                                                                                                                                                                                                                                                                                                                                                                                                                      | Lighthouse Lab in Glasgow                                                                        | Wellcome Sanger Institute for the COVID-19 Genomics UK (COG-UK) Consortium                       | Harper VanSteenhouse, Yumi Kasai, David Gray, Carol Clugston, Anna Dominiczak and Alex Alderton, Roberto Amato, Sonia Goncalves, Ewan Harrison, David K. Jackson, Ian Johnston, Dominic Kwiatkowski, Cordelia Langford, John Sillitoe on behalf of the Wellcome Sanger Institute COVID-19 Surveillance Team |
| EPI_ISL_858576, EPI_ISL_858580                                                                                                                                                                                                                                                                                                                                                                                                                                                                                                                                                                                                                                                                                                                                                                                                                                                                                                                                                                                                                                                                                                                                                                                                                                                                                                                                                                                                                                                                                 | Lighthouse Lab in Alderley Park                                                                  | Wellcome Sanger Institute for the COVID-19 Genomics UK (COG-UK) Consortium                       | Jacquelyn Wynn, Mairead Hyland, The Lighthouse Lab in Alderley Park and Alex Alderton, Roberto Amato, Sonia Goncalves, Ewan Harrison, David K. Jackson, Ian Johnston, Dominic Kwiatkowski, Cordelia Langford, John Sillitoe on behalf of the Wellcome Sanger Institute COVID-19 Surveillance Team           |
| EPI_ISL_858583, EPI_ISL_858586, EPI_ISL_858587, EPI_ISL_858592, EPI_ISL_858594, EPI_ISL_858598, EPI_ISL_858601, EPI_ISL_858609, EPI_ISL_858610, EPI_ISL_858613, EPI_ISL_858614, EPI_ISL_858616, EPI_ISL_858618, EPI_ISL_858621, EPI_ISL_858623, EPI_ISL_858630, EPI_ISL_858633, EPI_ISL_858637, EPI_ISL_858638, EPI_ISL_858640, EPI_ISL_858641, EPI_ISL_858642                                                                                                                                                                                                                                                                                                                                                                                                                                                                                                                                                                                                                                                                                                                                                                                                                                                                                                                                                                                                                                                                                                                                                 |                                                                                                  |                                                                                                  |                                                                                                                                                                                                                                                                                                             |
| see above                                                                                                                                                                                                                                                                                                                                                                                                                                                                                                                                                                                                                                                                                                                                                                                                                                                                                                                                                                                                                                                                                                                                                                                                                                                                                                                                                                                                                                                                                                      | Lighthouse Lab in Glasgow                                                                        | Wellcome Sanger Institute for the COVID-19 Genomics UK (COG-UK) Consortium                       | Harper VanSteenhouse, Yumi Kasai, David Gray, Carol Clugston, Anna Dominiczak and Alex Alderton, Roberto Amato, Sonia Goncalves, Ewan Harrison, David K. Jackson, Ian Johnston, Dominic Kwiatkowski, Cordelia Langford, John Sillitoe on behalf of the Wellcome Sanger Institute COVID-19 Surveillance Team |
| EPI_ISL_858645                                                                                                                                                                                                                                                                                                                                                                                                                                                                                                                                                                                                                                                                                                                                                                                                                                                                                                                                                                                                                                                                                                                                                                                                                                                                                                                                                                                                                                                                                                 | Lighthouse Lab in Alderley Park                                                                  | Wellcome Sanger Institute for the COVID-19 Genomics UK (COG-UK) Consortium                       | Jacquelyn Wynn, Mairead Hyland, The Lighthouse Lab in Alderley Park and Alex Alderton, Roberto Amato, Sonia Goncalves, Ewan Harrison, David K. Jackson, Ian Johnston, Dominic Kwiatkowski, Cordelia Langford, John Sillitoe on behalf of the Wellcome Sanger Institute COVID-19 Surveillance Team           |
| EPI_ISL_858646, EPI_ISL_858650, EPI_ISL_858656, EPI_ISL_858657, EPI_ISL_858659, EPI_ISL_858660, EPI_ISL_858668                                                                                                                                                                                                                                                                                                                                                                                                                                                                                                                                                                                                                                                                                                                                                                                                                                                                                                                                                                                                                                                                                                                                                                                                                                                                                                                                                                                                 | Lighthouse Lab in Glasgow                                                                        | Wellcome Sanger Institute for the COVID-19 Genomics UK (COG-UK) Consortium                       | Harper VanSteenhouse, Yumi Kasai, David Gray, Carol Clugston, Anna Dominiczak and Alex Alderton, Roberto Amato, Sonia Goncalves, Ewan Harrison, David K. Jackson, Ian Johnston, Dominic Kwiatkowski, Cordelia Langford, John Sillitoe on behalf of the Wellcome Sanger Institute COVID-19 Surveillance Team |
| EPI_ISL_860190                                                                                                                                                                                                                                                                                                                                                                                                                                                                                                                                                                                                                                                                                                                                                                                                                                                                                                                                                                                                                                                                                                                                                                                                                                                                                                                                                                                                                                                                                                 | Railway Hospital                                                                                 | Department of Neurovirology, National Institute of Mental Health and Neurosciences (NIMHANS)     | Chitra Pattabiraman, Pramada Prasad, Anson Kunjumon George, Risha Rasheed, Darshan Sreenivas, Nakka Vijay Kiran Reddy, Anita S Desai, V Ravi                                                                                                                                                                |
| EPI_ISL_860210, EPI_ISL_860212                                                                                                                                                                                                                                                                                                                                                                                                                                                                                                                                                                                                                                                                                                                                                                                                                                                                                                                                                                                                                                                                                                                                                                                                                                                                                                                                                                                                                                                                                 | Akershus University Hospital, Department for Microbiology and Infectious Disease Control         | Norwegian Institute of Public Health, Department of Virology                                     | Kathrine Stene-Johansen, Kamilla Heddeland Instefjord, Hilde Elshaug, Atiya R Ali, Marie Paulsen Madsen, Rasmus Riis Kopperud, Hilde Vollan, Karoline Bragstad, Olav Hungnes                                                                                                                                |
| EPI_ISL_860215                                                                                                                                                                                                                                                                                                                                                                                                                                                                                                                                                                                                                                                                                                                                                                                                                                                                                                                                                                                                                                                                                                                                                                                                                                                                                                                                                                                                                                                                                                 | Norwegian Institute of Public Health, Department of Virology                                     | Norwegian Institute of Public Health, Department of Virology                                     | Kathrine Stene-Johansen, Kamilla Heddeland Instefjord, Hilde Elshaug, Atiya R Ali, Marie Paulsen Madsen, Rasmus Riis Kopperud, Hilde Vollan, Karoline Bragstad, Olav Hungnes                                                                                                                                |
| EPI_ISL_860232                                                                                                                                                                                                                                                                                                                                                                                                                                                                                                                                                                                                                                                                                                                                                                                                                                                                                                                                                                                                                                                                                                                                                                                                                                                                                                                                                                                                                                                                                                 | Akershus University Hospital, Department for Microbiology and Infectious Disease Control         | Norwegian Institute of Public Health, Department of Virology                                     | Kathrine Stene-Johansen, Kamilla Heddeland Instefjord, Hilde Elshaug, Atiya R Ali, Marie Paulsen Madsen, Rasmus Riis Kopperud, Hilde Vollan, Karoline Bragstad, Olav Hungnes                                                                                                                                |
| EPI_ISL_860241, EPI_ISL_860242, EPI_ISL_860243, EPI_ISL_860246, EPI_ISL_860249, EPI_ISL_860250, EPI_ISL_860251, EPI_ISL_860252, EPI_ISL_860255                                                                                                                                                                                                                                                                                                                                                                                                                                                                                                                                                                                                                                                                                                                                                                                                                                                                                                                                                                                                                                                                                                                                                                                                                                                                                                                                                                 | University Hospitals of Geneva, Laboratory of Virology                                           | HUG, Laboratory of Virology and Universitätsspital Basel                                         | Samuel Cordey, Ana Rita Goncalves, Laurent Kaiser, Tim Roloff, Madlen Stange, Helena MB Seth-Smith, Alfredo Mari, Karoline Leuzinger, Julia Bielicki, Manuel Battagay, Hans Hirsch, Adrian Egli                                                                                                             |
| EPI_ISL_860259                                                                                                                                                                                                                                                                                                                                                                                                                                                                                                                                                                                                                                                                                                                                                                                                                                                                                                                                                                                                                                                                                                                                                                                                                                                                                                                                                                                                                                                                                                 | Akershus University Hospital, Department for Microbiology and Infectious Disease Control         | Norwegian Institute of Public Health, Department of Virology                                     | Kathrine Stene-Johansen, Kamilla Heddeland Instefjord, Hilde Elshaug, Atiya R Ali, Marie Paulsen Madsen, Rasmus Riis Kopperud, Hilde Vollan, Karoline Bragstad, Olav Hungnes                                                                                                                                |
| EPI_ISL_860582                                                                                                                                                                                                                                                                                                                                                                                                                                                                                                                                                                                                                                                                                                                                                                                                                                                                                                                                                                                                                                                                                                                                                                                                                                                                                                                                                                                                                                                                                                 | NHLS-IALCH                                                                                       | KRISP, KZn Research Innovation and Sequencing Platform                                           | Giandhari J, Pillay S, Lessells R, Mdlalose K, York D, Khan S, Tegally H, Wilkinson E, de Oliveira T                                                                                                                                                                                                        |
| EPI_ISL_860692, EPI_ISL_860697, EPI_ISL_860701, EPI_ISL_860705, EPI_ISL_860706, EPI_ISL_860708                                                                                                                                                                                                                                                                                                                                                                                                                                                                                                                                                                                                                                                                                                                                                                                                                                                                                                                                                                                                                                                                                                                                                                                                                                                                                                                                                                                                                 | Respiratory Virus Unit, National Infection Service, Public Health England                        | COVID-19 Genomics UK (COG-UK) Consortium                                                         | PHE Covid Sequencing Team                                                                                                                                                                                                                                                                                   |
| EPI_ISL_860720, EPI_ISL_860721, EPI_ISL_860722, EPI_ISL_860723, EPI_ISL_860726                                                                                                                                                                                                                                                                                                                                                                                                                                                                                                                                                                                                                                                                                                                                                                                                                                                                                                                                                                                                                                                                                                                                                                                                                                                                                                                                                                                                                                 | Institute for Infectious Diseases, University of Bern, Switzerland                               | Institute for Infectious Diseases, University of Bern, Switzerland                               | Michel C Koch, Christian Baumann, Miguel A Terrazos Miani, Cora Sägesser, Pascal Bittel, Stephen L Leib, Peter Keller, Franziska Suter-Riniker, Alban Ramette                                                                                                                                               |
| EPI_ISL_860783                                                                                                                                                                                                                                                                                                                                                                                                                                                                                                                                                                                                                                                                                                                                                                                                                                                                                                                                                                                                                                                                                                                                                                                                                                                                                                                                                                                                                                                                                                 | Respiratory Virus Unit, National Infection Service, Public Health England                        | COVID-19 Genomics UK (COG-UK) Consortium                                                         | PHE Covid Sequencing Team                                                                                                                                                                                                                                                                                   |
| EPI_ISL_860785, EPI_ISL_860788                                                                                                                                                                                                                                                                                                                                                                                                                                                                                                                                                                                                                                                                                                                                                                                                                                                                                                                                                                                                                                                                                                                                                                                                                                                                                                                                                                                                                                                                                 | Charité Universitätsmedizin Berlin, Institute of Virology, Charitéplatz 1, 10117 Berlin, Germany | Charité Universitätsmedizin Berlin, Institute of Virology, Charitéplatz 1, 10117 Berlin, Germany | Victor M Corman, Julia Schneider, Jörn Beheim-Schwarzbach, Tobias Bleicker, Julia Tesch, Barbara Mühlemann, Talitha Veith, Terry Jones, Christian Drosten                                                                                                                                                   |
| EPI_ISL_860850, EPI_ISL_860851                                                                                                                                                                                                                                                                                                                                                                                                                                                                                                                                                                                                                                                                                                                                                                                                                                                                                                                                                                                                                                                                                                                                                                                                                                                                                                                                                                                                                                                                                 | HIA PERCY, Biologie médicale                                                                     | National Reference Center for Viruses of Respiratory Infections, Institut Pasteur, Paris         | Marion Barbet, Sylvie Behillil, Méline Bizard, Angela Brisebarre, Camille Capel, Etienne Simon-Lorière, Vincent Enouf, Maud Vanpeene, Sylvie van der Werf, Foissaud Vincent                                                                                                                                 |
| EPI_ISL_860947, EPI_ISL_860948, EPI_ISL_860949, EPI_ISL_860951, EPI_ISL_860952, EPI_ISL_860953, EPI_ISL_860954, EPI_ISL_860959, EPI_ISL_860961, EPI_ISL_860962, EPI_ISL_860966, EPI_ISL_860968, EPI_ISL_860971, EPI_ISL_860976, EPI_ISL_860979, EPI_ISL_860981, EPI_ISL_860983, EPI_ISL_860986, EPI_ISL_860987, EPI_ISL_860988, EPI_ISL_860989, EPI_ISL_860990, EPI_ISL_860991, EPI_ISL_860992, EPI_ISL_860995, EPI_ISL_860996, EPI_ISL_860998, EPI_ISL_860999, EPI_ISL_861001, EPI_ISL_861005, EPI_ISL_861006, EPI_ISL_861007, EPI_ISL_861012, EPI_ISL_861014, EPI_ISL_861015, EPI_ISL_861018, EPI_ISL_861023, EPI_ISL_861025, EPI_ISL_861027, EPI_ISL_861028, EPI_ISL_861031, EPI_ISL_861034, EPI_ISL_861035, EPI_ISL_861036, EPI_ISL_861037, EPI_ISL_861038, EPI_ISL_861042, EPI_ISL_861043, EPI_ISL_861046, EPI_ISL_861049, EPI_ISL_861053, EPI_ISL_861054, EPI_ISL_861055, EPI_ISL_861057, EPI_ISL_861059, EPI_ISL_861060, EPI_ISL_861062, EPI_ISL_861075, EPI_ISL_861076, EPI_ISL_861079, EPI_ISL_861082, EPI_ISL_861084, EPI_ISL_861087, EPI_ISL_861090, EPI_ISL_861091, EPI_ISL_861093, EPI_ISL_861095, EPI_ISL_861096, EPI_ISL_861099                                                                                                                                                                                                                                                                                                                                                                 |                                                                                                  |                                                                                                  |                                                                                                                                                                                                                                                                                                             |
| see above                                                                                                                                                                                                                                                                                                                                                                                                                                                                                                                                                                                                                                                                                                                                                                                                                                                                                                                                                                                                                                                                                                                                                                                                                                                                                                                                                                                                                                                                                                      | Johns Hopkins Hospital Department of Pathology                                                   | Johns Hopkins Hospital Department of Pathology                                                   | C. Paul Morris, Chun Huai Luo, Adannaya Amadi, Nicholas Gallagher, Heba H. Mostafa                                                                                                                                                                                                                          |
| EPI_ISL_861117                                                                                                                                                                                                                                                                                                                                                                                                                                                                                                                                                                                                                                                                                                                                                                                                                                                                                                                                                                                                                                                                                                                                                                                                                                                                                                                                                                                                                                                                                                 | Wadsworth Center, New York State Department of Health                                            | Wadsworth Center, New York State Department of Health                                            | Kirsten St. George, Daryl M. Lamson, Alexis Russel, Matthew Shudt, Melissa A Leisner, Jonathan Plitnick, Navjot Singh, John Kelly, Erasmus Schneider, Erica Lasek-Nesselquist                                                                                                                               |
| EPI_ISL_861124, EPI_ISL_861126, EPI_ISL_861132                                                                                                                                                                                                                                                                                                                                                                                                                                                                                                                                                                                                                                                                                                                                                                                                                                                                                                                                                                                                                                                                                                                                                                                                                                                                                                                                                                                                                                                                 | New York Presbyterian Hospital                                                                   | Wadsworth Center, New York State Department of Health                                            | Kirsten St. George, Daryl M. Lamson, Alexis Russel, Matthew Shudt, Melissa A Leisner, Jonathan Plitnick, Navjot Singh, John Kelly, Erasmus Schneider, Erica Lasek-Nesselquist                                                                                                                               |
| EPI_ISL_861178                                                                                                                                                                                                                                                                                                                                                                                                                                                                                                                                                                                                                                                                                                                                                                                                                                                                                                                                                                                                                                                                                                                                                                                                                                                                                                                                                                                                                                                                                                 | BIO-REFERENCE LABORATORIES                                                                       | Wadsworth Center, New York State Department of Health                                            | Kirsten St. George, Daryl M. Lamson, Alexis Russel, Matthew Shudt, Melissa A Leisner, Jonathan Plitnick, Navjot Singh, John Kelly, Erasmus Schneider, Erica Lasek-Nesselquist                                                                                                                               |

|                                                                                                                                                                                                                                                                                                                                                                                                                                                                                                                                                                                                                                                                                                                                                                                                                                                                                                                                                                                                                                                                                                                                                                                                                                                                                                                                                                                                                                                                                                                                                                                                                                                                                                                                                                                                                                                                                                                                                                                                                                                                                                                                                                                                                                                                                                                                                                                                                                |                                                                                                                  |                                                                                                    |                                                                                                                                                                                                                                                                                                             |
|--------------------------------------------------------------------------------------------------------------------------------------------------------------------------------------------------------------------------------------------------------------------------------------------------------------------------------------------------------------------------------------------------------------------------------------------------------------------------------------------------------------------------------------------------------------------------------------------------------------------------------------------------------------------------------------------------------------------------------------------------------------------------------------------------------------------------------------------------------------------------------------------------------------------------------------------------------------------------------------------------------------------------------------------------------------------------------------------------------------------------------------------------------------------------------------------------------------------------------------------------------------------------------------------------------------------------------------------------------------------------------------------------------------------------------------------------------------------------------------------------------------------------------------------------------------------------------------------------------------------------------------------------------------------------------------------------------------------------------------------------------------------------------------------------------------------------------------------------------------------------------------------------------------------------------------------------------------------------------------------------------------------------------------------------------------------------------------------------------------------------------------------------------------------------------------------------------------------------------------------------------------------------------------------------------------------------------------------------------------------------------------------------------------------------------|------------------------------------------------------------------------------------------------------------------|----------------------------------------------------------------------------------------------------|-------------------------------------------------------------------------------------------------------------------------------------------------------------------------------------------------------------------------------------------------------------------------------------------------------------|
| EPI_ISL_861189, EPI_ISL_861198                                                                                                                                                                                                                                                                                                                                                                                                                                                                                                                                                                                                                                                                                                                                                                                                                                                                                                                                                                                                                                                                                                                                                                                                                                                                                                                                                                                                                                                                                                                                                                                                                                                                                                                                                                                                                                                                                                                                                                                                                                                                                                                                                                                                                                                                                                                                                                                                 | NORTH SHORE UNIVERSITY HOSPITAL                                                                                  | Wadsworth Center, New York State Department of Health                                              | Kirsten St. George, Daryl M. Lamson, Alexis Russel, Matthew Shudt, Melissa A Leisner, Jonathan Plitnick, Navjot Singh, John Kelly, Erasmus Schneider, Erica Lasek-Nesselquist                                                                                                                               |
| EPI_ISL_861201, EPI_ISL_861204, EPI_ISL_861206, EPI_ISL_861209                                                                                                                                                                                                                                                                                                                                                                                                                                                                                                                                                                                                                                                                                                                                                                                                                                                                                                                                                                                                                                                                                                                                                                                                                                                                                                                                                                                                                                                                                                                                                                                                                                                                                                                                                                                                                                                                                                                                                                                                                                                                                                                                                                                                                                                                                                                                                                 | URMC LABS                                                                                                        | Wadsworth Center, New York State Department of Health                                              | Kirsten St. George, Daryl M. Lamson, Alexis Russel, Matthew Shudt, Melissa A Leisner, Jonathan Plitnick, Navjot Singh, John Kelly, Erasmus Schneider, Erica Lasek-Nesselquist                                                                                                                               |
| EPI_ISL_861332                                                                                                                                                                                                                                                                                                                                                                                                                                                                                                                                                                                                                                                                                                                                                                                                                                                                                                                                                                                                                                                                                                                                                                                                                                                                                                                                                                                                                                                                                                                                                                                                                                                                                                                                                                                                                                                                                                                                                                                                                                                                                                                                                                                                                                                                                                                                                                                                                 | DOHMH Central Harlem                                                                                             | New York City Public Health Laboratory                                                             | Jade Wang, et al.                                                                                                                                                                                                                                                                                           |
| EPI_ISL_861333, EPI_ISL_861367, EPI_ISL_861368, EPI_ISL_861372, EPI_ISL_861375, EPI_ISL_861378, EPI_ISL_861381, EPI_ISL_861384, EPI_ISL_861389, EPI_ISL_861390, EPI_ISL_861395, EPI_ISL_861396, EPI_ISL_861407                                                                                                                                                                                                                                                                                                                                                                                                                                                                                                                                                                                                                                                                                                                                                                                                                                                                                                                                                                                                                                                                                                                                                                                                                                                                                                                                                                                                                                                                                                                                                                                                                                                                                                                                                                                                                                                                                                                                                                                                                                                                                                                                                                                                                 |                                                                                                                  |                                                                                                    |                                                                                                                                                                                                                                                                                                             |
| see above                                                                                                                                                                                                                                                                                                                                                                                                                                                                                                                                                                                                                                                                                                                                                                                                                                                                                                                                                                                                                                                                                                                                                                                                                                                                                                                                                                                                                                                                                                                                                                                                                                                                                                                                                                                                                                                                                                                                                                                                                                                                                                                                                                                                                                                                                                                                                                                                                      | WESTCHESTER MEDICAL CENTER                                                                                       | Wadsworth Center, New York State Department of Health                                              | Kirsten St. George, Daryl M. Lamson, Alexis Russel, Matthew Shudt, Melissa A Leisner, Jonathan Plitnick, Navjot Singh, John Kelly, Erasmus Schneider, Erica Lasek-Nesselquist                                                                                                                               |
| EPI_ISL_861416                                                                                                                                                                                                                                                                                                                                                                                                                                                                                                                                                                                                                                                                                                                                                                                                                                                                                                                                                                                                                                                                                                                                                                                                                                                                                                                                                                                                                                                                                                                                                                                                                                                                                                                                                                                                                                                                                                                                                                                                                                                                                                                                                                                                                                                                                                                                                                                                                 | NORTH SHORE UNIVERSITY HOSPITAL                                                                                  | Wadsworth Center, New York State Department of Health                                              | Kirsten St. George, Daryl M. Lamson, Alexis Russel, Matthew Shudt, Melissa A Leisner, Jonathan Plitnick, Navjot Singh, John Kelly, Erasmus Schneider, Erica Lasek-Nesselquist                                                                                                                               |
| EPI_ISL_861443, EPI_ISL_861444, EPI_ISL_861446, EPI_ISL_861447, EPI_ISL_861448, EPI_ISL_861449, EPI_ISL_861450, EPI_ISL_861451, EPI_ISL_861452, EPI_ISL_861453, EPI_ISL_861454, EPI_ISL_861455                                                                                                                                                                                                                                                                                                                                                                                                                                                                                                                                                                                                                                                                                                                                                                                                                                                                                                                                                                                                                                                                                                                                                                                                                                                                                                                                                                                                                                                                                                                                                                                                                                                                                                                                                                                                                                                                                                                                                                                                                                                                                                                                                                                                                                 |                                                                                                                  |                                                                                                    |                                                                                                                                                                                                                                                                                                             |
| see above                                                                                                                                                                                                                                                                                                                                                                                                                                                                                                                                                                                                                                                                                                                                                                                                                                                                                                                                                                                                                                                                                                                                                                                                                                                                                                                                                                                                                                                                                                                                                                                                                                                                                                                                                                                                                                                                                                                                                                                                                                                                                                                                                                                                                                                                                                                                                                                                                      | Clinical Molecular Microbiology Laboratory, UNC Hospitals                                                        | Jeremy Wang                                                                                        | Jeremy Wang, Alexander Rubinsteyn, Colleen Rice, Jason Smedberg, Melissa Miller, Corbin Jones, Robert Hagan                                                                                                                                                                                                 |
| EPI_ISL_861473                                                                                                                                                                                                                                                                                                                                                                                                                                                                                                                                                                                                                                                                                                                                                                                                                                                                                                                                                                                                                                                                                                                                                                                                                                                                                                                                                                                                                                                                                                                                                                                                                                                                                                                                                                                                                                                                                                                                                                                                                                                                                                                                                                                                                                                                                                                                                                                                                 | Gundersen Molecular Diagnostics Laboratory                                                                       | Kabara Cancer Research Institute                                                                   | Craig S. Richmond, Paraic A. Kenny                                                                                                                                                                                                                                                                          |
| EPI_ISL_861488                                                                                                                                                                                                                                                                                                                                                                                                                                                                                                                                                                                                                                                                                                                                                                                                                                                                                                                                                                                                                                                                                                                                                                                                                                                                                                                                                                                                                                                                                                                                                                                                                                                                                                                                                                                                                                                                                                                                                                                                                                                                                                                                                                                                                                                                                                                                                                                                                 | Cerballiance Côte d'Azur                                                                                         | CERBA LAB                                                                                          | Prots.L; Pichon R; Barrieu-Moussat S.                                                                                                                                                                                                                                                                       |
| EPI_ISL_861489                                                                                                                                                                                                                                                                                                                                                                                                                                                                                                                                                                                                                                                                                                                                                                                                                                                                                                                                                                                                                                                                                                                                                                                                                                                                                                                                                                                                                                                                                                                                                                                                                                                                                                                                                                                                                                                                                                                                                                                                                                                                                                                                                                                                                                                                                                                                                                                                                 | Cerballiance Côte d'Azur                                                                                         | CERBA LAB                                                                                          | Adjtouth Z; Mangiarotti T; Prots L.                                                                                                                                                                                                                                                                         |
| EPI_ISL_861490                                                                                                                                                                                                                                                                                                                                                                                                                                                                                                                                                                                                                                                                                                                                                                                                                                                                                                                                                                                                                                                                                                                                                                                                                                                                                                                                                                                                                                                                                                                                                                                                                                                                                                                                                                                                                                                                                                                                                                                                                                                                                                                                                                                                                                                                                                                                                                                                                 | Cerballiance Côte d'Azur                                                                                         | CERBA LAB                                                                                          | De La Chapelle A; Prots.L;                                                                                                                                                                                                                                                                                  |
| EPI_ISL_861491                                                                                                                                                                                                                                                                                                                                                                                                                                                                                                                                                                                                                                                                                                                                                                                                                                                                                                                                                                                                                                                                                                                                                                                                                                                                                                                                                                                                                                                                                                                                                                                                                                                                                                                                                                                                                                                                                                                                                                                                                                                                                                                                                                                                                                                                                                                                                                                                                 | Cerballiance Côte d'Azur                                                                                         | CERBA LAB                                                                                          | Chobert F; Prots.L                                                                                                                                                                                                                                                                                          |
| EPI_ISL_861492                                                                                                                                                                                                                                                                                                                                                                                                                                                                                                                                                                                                                                                                                                                                                                                                                                                                                                                                                                                                                                                                                                                                                                                                                                                                                                                                                                                                                                                                                                                                                                                                                                                                                                                                                                                                                                                                                                                                                                                                                                                                                                                                                                                                                                                                                                                                                                                                                 | Cerballiance Côte d'Azur                                                                                         | CERBA LAB                                                                                          | Barrieu-Moussat S;Adoul O;Boudjahem Z; Roman E; Chaudet L; Martin L; Aankour N; Jaugin P; Gastaud S; Prots L.                                                                                                                                                                                               |
| EPI_ISL_861493                                                                                                                                                                                                                                                                                                                                                                                                                                                                                                                                                                                                                                                                                                                                                                                                                                                                                                                                                                                                                                                                                                                                                                                                                                                                                                                                                                                                                                                                                                                                                                                                                                                                                                                                                                                                                                                                                                                                                                                                                                                                                                                                                                                                                                                                                                                                                                                                                 | Cerballiance Côte d'Azur                                                                                         | CERBA LAB                                                                                          | Marius M; Barsanti M; Maltese S; Francois J; Sinsoulieu T; Van Der Rhyn I; Morello V; Marcadal M; Gandillet A; Prots L.                                                                                                                                                                                     |
| EPI_ISL_861494                                                                                                                                                                                                                                                                                                                                                                                                                                                                                                                                                                                                                                                                                                                                                                                                                                                                                                                                                                                                                                                                                                                                                                                                                                                                                                                                                                                                                                                                                                                                                                                                                                                                                                                                                                                                                                                                                                                                                                                                                                                                                                                                                                                                                                                                                                                                                                                                                 | Cerballiance Côte d'Azur                                                                                         | CERBA LAB                                                                                          | Prots L. Raimondi V.                                                                                                                                                                                                                                                                                        |
| EPI_ISL_861495                                                                                                                                                                                                                                                                                                                                                                                                                                                                                                                                                                                                                                                                                                                                                                                                                                                                                                                                                                                                                                                                                                                                                                                                                                                                                                                                                                                                                                                                                                                                                                                                                                                                                                                                                                                                                                                                                                                                                                                                                                                                                                                                                                                                                                                                                                                                                                                                                 | Cerballiance Côte d'Azur                                                                                         | CERBA LAB                                                                                          | Pichon R. Quintle S; Sanza O; Mangiarotti T; Viltard B; Prots L.                                                                                                                                                                                                                                            |
| EPI_ISL_861497                                                                                                                                                                                                                                                                                                                                                                                                                                                                                                                                                                                                                                                                                                                                                                                                                                                                                                                                                                                                                                                                                                                                                                                                                                                                                                                                                                                                                                                                                                                                                                                                                                                                                                                                                                                                                                                                                                                                                                                                                                                                                                                                                                                                                                                                                                                                                                                                                 | Cerballiance Centre Est                                                                                          | CERBA LAB                                                                                          | Chanard C; Gazzano V; Munier C; Prots L.                                                                                                                                                                                                                                                                    |
| EPI_ISL_861500, EPI_ISL_861501, EPI_ISL_861502                                                                                                                                                                                                                                                                                                                                                                                                                                                                                                                                                                                                                                                                                                                                                                                                                                                                                                                                                                                                                                                                                                                                                                                                                                                                                                                                                                                                                                                                                                                                                                                                                                                                                                                                                                                                                                                                                                                                                                                                                                                                                                                                                                                                                                                                                                                                                                                 | Cerballiance Centre Est                                                                                          | CERBA LAB                                                                                          | Chanard E; Gazzano V; Munier C; Prots L.                                                                                                                                                                                                                                                                    |
| EPI_ISL_861539, EPI_ISL_861540, EPI_ISL_861550, EPI_ISL_861557, EPI_ISL_861595, EPI_ISL_861596, EPI_ISL_861597, EPI_ISL_861598, EPI_ISL_861599, EPI_ISL_861600, EPI_ISL_861601, EPI_ISL_861602, EPI_ISL_861603, EPI_ISL_861604, EPI_ISL_861605, EPI_ISL_861608, EPI_ISL_861609, EPI_ISL_861610, EPI_ISL_861611, EPI_ISL_861612, EPI_ISL_861614                                                                                                                                                                                                                                                                                                                                                                                                                                                                                                                                                                                                                                                                                                                                                                                                                                                                                                                                                                                                                                                                                                                                                                                                                                                                                                                                                                                                                                                                                                                                                                                                                                                                                                                                                                                                                                                                                                                                                                                                                                                                                 |                                                                                                                  |                                                                                                    |                                                                                                                                                                                                                                                                                                             |
| see above                                                                                                                                                                                                                                                                                                                                                                                                                                                                                                                                                                                                                                                                                                                                                                                                                                                                                                                                                                                                                                                                                                                                                                                                                                                                                                                                                                                                                                                                                                                                                                                                                                                                                                                                                                                                                                                                                                                                                                                                                                                                                                                                                                                                                                                                                                                                                                                                                      | Instituto Nacional de Saude (INSA)                                                                               | Instituto Nacional de Saude (INSA)                                                                 | Borges et al                                                                                                                                                                                                                                                                                                |
| EPI_ISL_861683                                                                                                                                                                                                                                                                                                                                                                                                                                                                                                                                                                                                                                                                                                                                                                                                                                                                                                                                                                                                                                                                                                                                                                                                                                                                                                                                                                                                                                                                                                                                                                                                                                                                                                                                                                                                                                                                                                                                                                                                                                                                                                                                                                                                                                                                                                                                                                                                                 | Complexo Hospitalar Padre Bento de Guarulhos                                                                     | Instituto Adolfo Lutz, Interdisciplinary Procedures Center, Strategic Laboratory                   | Claudio Tavares Sacchi, Claudia Regina Gonçalves, Erica Valessa Ramos Gomes, Karoline Rodrigues Campos                                                                                                                                                                                                      |
| EPI_ISL_861685                                                                                                                                                                                                                                                                                                                                                                                                                                                                                                                                                                                                                                                                                                                                                                                                                                                                                                                                                                                                                                                                                                                                                                                                                                                                                                                                                                                                                                                                                                                                                                                                                                                                                                                                                                                                                                                                                                                                                                                                                                                                                                                                                                                                                                                                                                                                                                                                                 | Hospital Pronto Socorro Itaquera                                                                                 | Instituto Adolfo Lutz, Interdisciplinary Procedures Center, Strategic Laboratory                   | Claudio Tavares Sacchi, Claudia Regina Gonçalves, Erica Valessa Ramos Gomes, Karoline Rodrigues Campos                                                                                                                                                                                                      |
| EPI_ISL_861693, EPI_ISL_861695                                                                                                                                                                                                                                                                                                                                                                                                                                                                                                                                                                                                                                                                                                                                                                                                                                                                                                                                                                                                                                                                                                                                                                                                                                                                                                                                                                                                                                                                                                                                                                                                                                                                                                                                                                                                                                                                                                                                                                                                                                                                                                                                                                                                                                                                                                                                                                                                 | Los Angeles County PHL                                                                                           | Los Angeles County PHL                                                                             | P. Hemarajata et al.                                                                                                                                                                                                                                                                                        |
| EPI_ISL_861712, EPI_ISL_861713                                                                                                                                                                                                                                                                                                                                                                                                                                                                                                                                                                                                                                                                                                                                                                                                                                                                                                                                                                                                                                                                                                                                                                                                                                                                                                                                                                                                                                                                                                                                                                                                                                                                                                                                                                                                                                                                                                                                                                                                                                                                                                                                                                                                                                                                                                                                                                                                 | Laboratory for Respiratory Viruses, Cantacuzino National Military-Medical Institute for Research and Development | Cantacuzino Institute Virology                                                                     | Mihaela Lazar, Luiza Ustea, Nicoleta Paraschiv, Tim Durfee                                                                                                                                                                                                                                                  |
| EPI_ISL_862048                                                                                                                                                                                                                                                                                                                                                                                                                                                                                                                                                                                                                                                                                                                                                                                                                                                                                                                                                                                                                                                                                                                                                                                                                                                                                                                                                                                                                                                                                                                                                                                                                                                                                                                                                                                                                                                                                                                                                                                                                                                                                                                                                                                                                                                                                                                                                                                                                 | Respiratory Virus Unit, National Infection Service, Public Health England                                        | COVID-19 Genomics UK (COG-UK) Consortium                                                           | PHE Covid Sequencing Team                                                                                                                                                                                                                                                                                   |
| EPI_ISL_862051                                                                                                                                                                                                                                                                                                                                                                                                                                                                                                                                                                                                                                                                                                                                                                                                                                                                                                                                                                                                                                                                                                                                                                                                                                                                                                                                                                                                                                                                                                                                                                                                                                                                                                                                                                                                                                                                                                                                                                                                                                                                                                                                                                                                                                                                                                                                                                                                                 | Multidisciplinary Research Unit, DHR-ICMR, Institute of Medical Sciences, Banaras Hindu University               | Multidisciplinary Research Unit, DHR-ICMR, Institute of Medical Sciences, Banaras Hindu University | Priyoneel Basu, Ashish, Nitish Kumar Singh, Abhay Kumar Yadav, Manpreet Kaur, Arup Acharjee, Deepa Devadas, Chetan Sahni, Sanjay Kumar, Tribhuwan Mohan Mahapatra, Richa Arya, Prashant Singh, Jay Prakash Maurya, Surendra Pratap Mishra, Royana Singh                                                     |
| EPI_ISL_862163, EPI_ISL_862165, EPI_ISL_862167, EPI_ISL_862178, EPI_ISL_862179                                                                                                                                                                                                                                                                                                                                                                                                                                                                                                                                                                                                                                                                                                                                                                                                                                                                                                                                                                                                                                                                                                                                                                                                                                                                                                                                                                                                                                                                                                                                                                                                                                                                                                                                                                                                                                                                                                                                                                                                                                                                                                                                                                                                                                                                                                                                                 | Charité Universitätsmedizin Berlin, Institut für Virologie/Labor Berlin                                          | Charité Universitätsmedizin Berlin, Institut für Virologie                                         | Victor M Corman, Barbara Mühlemann, Jörn Beheim-Schwarzbach, Tobias Bleicker, Julia Tesch, Talitha Veith, Julia Schneider, Terry Jones, Christian Drosten                                                                                                                                                   |
| EPI_ISL_862191, EPI_ISL_862193, EPI_ISL_862195, EPI_ISL_862196, EPI_ISL_862197, EPI_ISL_862198, EPI_ISL_862200, EPI_ISL_862201, EPI_ISL_862204, EPI_ISL_862207, EPI_ISL_862208, EPI_ISL_862210, EPI_ISL_862211, EPI_ISL_862212, EPI_ISL_862214, EPI_ISL_862220, EPI_ISL_862222, EPI_ISL_862225, EPI_ISL_862227, EPI_ISL_862229, EPI_ISL_862230, EPI_ISL_862231, EPI_ISL_862235, EPI_ISL_862236, EPI_ISL_862238, EPI_ISL_862240, EPI_ISL_862241, EPI_ISL_862243, EPI_ISL_862245, EPI_ISL_862246, EPI_ISL_862247, EPI_ISL_862252, EPI_ISL_862256, EPI_ISL_862260, EPI_ISL_862263                                                                                                                                                                                                                                                                                                                                                                                                                                                                                                                                                                                                                                                                                                                                                                                                                                                                                                                                                                                                                                                                                                                                                                                                                                                                                                                                                                                                                                                                                                                                                                                                                                                                                                                                                                                                                                                 |                                                                                                                  |                                                                                                    |                                                                                                                                                                                                                                                                                                             |
| see above                                                                                                                                                                                                                                                                                                                                                                                                                                                                                                                                                                                                                                                                                                                                                                                                                                                                                                                                                                                                                                                                                                                                                                                                                                                                                                                                                                                                                                                                                                                                                                                                                                                                                                                                                                                                                                                                                                                                                                                                                                                                                                                                                                                                                                                                                                                                                                                                                      | Respiratory Virus Unit, National Infection Service, Public Health England                                        | COVID-19 Genomics UK (COG-UK) Consortium                                                           | PHE Covid Sequencing Team                                                                                                                                                                                                                                                                                   |
| EPI_ISL_862672, EPI_ISL_862674, EPI_ISL_862686, EPI_ISL_862687, EPI_ISL_862693, EPI_ISL_862694, EPI_ISL_862695, EPI_ISL_862700, EPI_ISL_862701, EPI_ISL_862703, EPI_ISL_862704, EPI_ISL_862706                                                                                                                                                                                                                                                                                                                                                                                                                                                                                                                                                                                                                                                                                                                                                                                                                                                                                                                                                                                                                                                                                                                                                                                                                                                                                                                                                                                                                                                                                                                                                                                                                                                                                                                                                                                                                                                                                                                                                                                                                                                                                                                                                                                                                                 |                                                                                                                  |                                                                                                    |                                                                                                                                                                                                                                                                                                             |
| see above                                                                                                                                                                                                                                                                                                                                                                                                                                                                                                                                                                                                                                                                                                                                                                                                                                                                                                                                                                                                                                                                                                                                                                                                                                                                                                                                                                                                                                                                                                                                                                                                                                                                                                                                                                                                                                                                                                                                                                                                                                                                                                                                                                                                                                                                                                                                                                                                                      | New Mexico Department of Health Scientific Laboratory                                                            | New Mexico Department of Health Scientific Laboratory                                              | D'eldra Malone, Ellie Johnson, Anastacia Griego-Fisher                                                                                                                                                                                                                                                      |
| EPI_ISL_862788                                                                                                                                                                                                                                                                                                                                                                                                                                                                                                                                                                                                                                                                                                                                                                                                                                                                                                                                                                                                                                                                                                                                                                                                                                                                                                                                                                                                                                                                                                                                                                                                                                                                                                                                                                                                                                                                                                                                                                                                                                                                                                                                                                                                                                                                                                                                                                                                                 | Cancer Biology Department, National Cancer Institute                                                             | Cancer Biology Department, National Cancer Institute                                               | Zekri,A.N., Sedawy,M.G., Ahmed,O.S., Hafez,M.M., Soliman,H.K., Bahnassy,A.A., Elhosiény,F.W., Gad,A.E., Hamdy,M.S., Soliman,M.S., Soliman,L., Abouelhoda,M.                                                                                                                                                 |
| EPI_ISL_862831, EPI_ISL_862833, EPI_ISL_862834, EPI_ISL_862835, EPI_ISL_862836                                                                                                                                                                                                                                                                                                                                                                                                                                                                                                                                                                                                                                                                                                                                                                                                                                                                                                                                                                                                                                                                                                                                                                                                                                                                                                                                                                                                                                                                                                                                                                                                                                                                                                                                                                                                                                                                                                                                                                                                                                                                                                                                                                                                                                                                                                                                                 | National Institute of Infectious Diseases-Prof. Dr. Matei Bals Molecular Diagnostics Laboratory                  | National Institute of Infectious Diseases-Prof. Dr. Matei Bals Molecular Diagnostics Laboratory    | Leontina Banica, Marius Surleac, Corina Casanguiu, Petre Milu, Andreea Tudor, Simona Paraschiv, Dan Otelea                                                                                                                                                                                                  |
| EPI_ISL_862892, EPI_ISL_862893, EPI_ISL_862895, EPI_ISL_862896, EPI_ISL_862897, EPI_ISL_862899, EPI_ISL_862901, EPI_ISL_862905, EPI_ISL_862908, EPI_ISL_862913, EPI_ISL_862914, EPI_ISL_862916, EPI_ISL_862920, EPI_ISL_862926, EPI_ISL_862928, EPI_ISL_862930, EPI_ISL_862932, EPI_ISL_862933, EPI_ISL_862939, EPI_ISL_862942, EPI_ISL_862943, EPI_ISL_862944, EPI_ISL_862945, EPI_ISL_862946, EPI_ISL_862953, EPI_ISL_862954, EPI_ISL_862959, EPI_ISL_862960, EPI_ISL_862961, EPI_ISL_862964, EPI_ISL_862965, EPI_ISL_862969, EPI_ISL_862970, EPI_ISL_862972, EPI_ISL_862973, EPI_ISL_862974, EPI_ISL_862975, EPI_ISL_862977, EPI_ISL_862978, EPI_ISL_862980, EPI_ISL_862982, EPI_ISL_862984, EPI_ISL_862986, EPI_ISL_862987, EPI_ISL_862991, EPI_ISL_862993, EPI_ISL_862994, EPI_ISL_862995, EPI_ISL_862999, EPI_ISL_863005, EPI_ISL_863006, EPI_ISL_863009, EPI_ISL_863011, EPI_ISL_863012, EPI_ISL_863014, EPI_ISL_863020, EPI_ISL_863021, EPI_ISL_863022, EPI_ISL_863024, EPI_ISL_863025, EPI_ISL_863026, EPI_ISL_863029, EPI_ISL_863039, EPI_ISL_863040, EPI_ISL_863043, EPI_ISL_863045, EPI_ISL_863054, EPI_ISL_863057, EPI_ISL_863059, EPI_ISL_863060, EPI_ISL_863062, EPI_ISL_863063, EPI_ISL_863064, EPI_ISL_863068, EPI_ISL_863073, EPI_ISL_863075, EPI_ISL_863085, EPI_ISL_863086, EPI_ISL_863087, EPI_ISL_863088, EPI_ISL_863092, EPI_ISL_863097, EPI_ISL_863098, EPI_ISL_863102, EPI_ISL_863104, EPI_ISL_863109, EPI_ISL_863111, EPI_ISL_863113, EPI_ISL_863114, EPI_ISL_863119, EPI_ISL_863120, EPI_ISL_863123, EPI_ISL_863124, EPI_ISL_863125, EPI_ISL_863127, EPI_ISL_863128, EPI_ISL_863130, EPI_ISL_863131, EPI_ISL_863133, EPI_ISL_863142, EPI_ISL_863146, EPI_ISL_863149, EPI_ISL_863150, EPI_ISL_863153, EPI_ISL_863157, EPI_ISL_863159, EPI_ISL_863163, EPI_ISL_863166, EPI_ISL_863167, EPI_ISL_863170, EPI_ISL_863172, EPI_ISL_863173, EPI_ISL_863176, EPI_ISL_863177, EPI_ISL_863178, EPI_ISL_863182, EPI_ISL_863184, EPI_ISL_863185, EPI_ISL_863186, EPI_ISL_863187, EPI_ISL_863190, EPI_ISL_863191, EPI_ISL_863194, EPI_ISL_863195, EPI_ISL_863196, EPI_ISL_863197, EPI_ISL_863199, EPI_ISL_863200, EPI_ISL_863208, EPI_ISL_863209, EPI_ISL_863213, EPI_ISL_863214, EPI_ISL_863219, EPI_ISL_863220, EPI_ISL_863221, EPI_ISL_863224, EPI_ISL_863225, EPI_ISL_863227, EPI_ISL_863228, EPI_ISL_863229, EPI_ISL_863231, EPI_ISL_863237, EPI_ISL_863239, EPI_ISL_863241, EPI_ISL_863242, EPI_ISL_863244 |                                                                                                                  |                                                                                                    |                                                                                                                                                                                                                                                                                                             |
| see above                                                                                                                                                                                                                                                                                                                                                                                                                                                                                                                                                                                                                                                                                                                                                                                                                                                                                                                                                                                                                                                                                                                                                                                                                                                                                                                                                                                                                                                                                                                                                                                                                                                                                                                                                                                                                                                                                                                                                                                                                                                                                                                                                                                                                                                                                                                                                                                                                      | Lighthouse Lab in Alderley Park                                                                                  | Wellcome Sanger Institute for the COVID-19 Genomics UK (COG-UK) Consortium                         | Jacquelyn Wynn, Mairead Hyland, The Lighthouse Lab in Alderley Park and Alex Alderton, Roberto Amato, Sonia Goncalves, Ewan Harrison, David K. Jackson, Ian Johnston, Dominic Kwiatkowski, Cordelia Langford, John Sillitoe on behalf of the Wellcome Sanger Institute COVID-19 Surveillance Team           |
| EPI_ISL_863245, EPI_ISL_863247, EPI_ISL_863249, EPI_ISL_863252                                                                                                                                                                                                                                                                                                                                                                                                                                                                                                                                                                                                                                                                                                                                                                                                                                                                                                                                                                                                                                                                                                                                                                                                                                                                                                                                                                                                                                                                                                                                                                                                                                                                                                                                                                                                                                                                                                                                                                                                                                                                                                                                                                                                                                                                                                                                                                 | Lighthouse Lab in Glasgow                                                                                        | Wellcome Sanger Institute for the COVID-19 Genomics UK (COG-UK) Consortium                         | Harper VanSteenhouse, Yumi Kasai, David Gray, Carol Clugston, Anna Dominiczak and Alex Alderton, Roberto Amato, Sonia Goncalves, Ewan Harrison, David K. Jackson, Ian Johnston, Dominic Kwiatkowski, Cordelia Langford, John Sillitoe on behalf of the Wellcome Sanger Institute COVID-19 Surveillance Team |
| EPI_ISL_863254                                                                                                                                                                                                                                                                                                                                                                                                                                                                                                                                                                                                                                                                                                                                                                                                                                                                                                                                                                                                                                                                                                                                                                                                                                                                                                                                                                                                                                                                                                                                                                                                                                                                                                                                                                                                                                                                                                                                                                                                                                                                                                                                                                                                                                                                                                                                                                                                                 | Lighthouse Lab in Alderley Park                                                                                  | Wellcome Sanger Institute for the COVID-19 Genomics UK (COG-UK) Consortium                         | Jacquelyn Wynn, Mairead Hyland, The Lighthouse Lab in Alderley Park and Alex Alderton, Roberto Amato, Sonia Goncalves, Ewan Harrison, David K. Jackson, Ian Johnston, Dominic Kwiatkowski, Cordelia Langford, John Sillitoe on behalf of the Wellcome Sanger Institute COVID-19 Surveillance Team           |
| EPI_ISL_863255, EPI_ISL_863257                                                                                                                                                                                                                                                                                                                                                                                                                                                                                                                                                                                                                                                                                                                                                                                                                                                                                                                                                                                                                                                                                                                                                                                                                                                                                                                                                                                                                                                                                                                                                                                                                                                                                                                                                                                                                                                                                                                                                                                                                                                                                                                                                                                                                                                                                                                                                                                                 | Lighthouse Lab in Glasgow                                                                                        | Wellcome Sanger Institute for the COVID-19 Genomics UK                                             | Harper VanSteenhouse, Yumi Kasai, David Gray, Carol Clugston, Anna Dominiczak and Alex Alderton, Roberto Amato, Sonia Goncalves, Ewan Harrison,                                                                                                                                                             |

[illegible]









|                                                                                                                                                                                                                                                                                                                                                                                                                                |                                                                                                |                                                                                                |                                                                                                                                                                                                                                                                          |
|--------------------------------------------------------------------------------------------------------------------------------------------------------------------------------------------------------------------------------------------------------------------------------------------------------------------------------------------------------------------------------------------------------------------------------|------------------------------------------------------------------------------------------------|------------------------------------------------------------------------------------------------|--------------------------------------------------------------------------------------------------------------------------------------------------------------------------------------------------------------------------------------------------------------------------|
| EPI_ISL_872284, EPI_ISL_872285, EPI_ISL_872286, EPI_ISL_872287, EPI_ISL_872288                                                                                                                                                                                                                                                                                                                                                 | Labo Analyses Med                                                                              | National Reference Center for Viruses of Respiratory Infections, Institut Pasteur, Paris       | Marion Barbet, Sylvie Behillil, Méline Bizard, Angela Brisebarre, Camille Capel, Etienne Simon-Lorière, Vincent Enouf, Maud Vanpeene, Sylvie van der Werf                                                                                                                |
| EPI_ISL_872291, EPI_ISL_872295, EPI_ISL_872296                                                                                                                                                                                                                                                                                                                                                                                 | Hopital                                                                                        | National Reference Center for Viruses of Respiratory Infections, Institut Pasteur, Paris       | Marion Barbet, Sylvie Behillil, Méline Bizard, Angela Brisebarre, Camille Capel, Etienne Simon-Lorière, Vincent Enouf, Maud Vanpeene, Sylvie van der Werf,Guigon AuréLie                                                                                                 |
| EPI_ISL_872298, EPI_ISL_872299, EPI_ISL_872301, EPI_ISL_872302, EPI_ISL_872303, EPI_ISL_872305                                                                                                                                                                                                                                                                                                                                 | Hopital                                                                                        | National Reference Center for Viruses of Respiratory Infections, Institut Pasteur, Paris       | Marion Barbet, Sylvie Behillil, Méline Bizard, Angela Brisebarre, Camille Capel, Etienne Simon-Lorière, Vincent Enouf, Maud Vanpeene, Sylvie van der Werf,Florin CéCile                                                                                                  |
| EPI_ISL_872306, EPI_ISL_872307                                                                                                                                                                                                                                                                                                                                                                                                 | Hopital                                                                                        | National Reference Center for Viruses of Respiratory Infections, Institut Pasteur, Paris       | Marion Barbet, Sylvie Behillil, Méline Bizard, Angela Brisebarre, Camille Capel, Etienne Simon-Lorière, Vincent Enouf, Maud Vanpeene, Sylvie van der Werf,Castelain Sandrine                                                                                             |
| EPI_ISL_872308                                                                                                                                                                                                                                                                                                                                                                                                                 | Hopital                                                                                        | National Reference Center for Viruses of Respiratory Infections, Institut Pasteur, Paris       | Marion Barbet, Sylvie Behillil, Méline Bizard, Angela Brisebarre, Camille Capel, Etienne Simon-Lorière, Vincent Enouf, Maud Vanpeene, Sylvie van der Werf,Brichler Ségolène                                                                                              |
| EPI_ISL_872314                                                                                                                                                                                                                                                                                                                                                                                                                 | Labo analyses med                                                                              | National Reference Center for Viruses of Respiratory Infections, Institut Pasteur, Paris       | Marion Barbet, Sylvie Behillil, Méline Bizard, Angela Brisebarre, Camille Capel, Etienne Simon-Lorière, Vincent Enouf, Maud Vanpeene, Sylvie van der Werf,Amzalag Jonas                                                                                                  |
| EPI_ISL_872322                                                                                                                                                                                                                                                                                                                                                                                                                 | Labo Analyses Med                                                                              | National Reference Center for Viruses of Respiratory Infections, Institut Pasteur, Paris       | Marion Barbet, Sylvie Behillil, Méline Bizard, Angela Brisebarre, Camille Capel, Etienne Simon-Lorière, Vincent Enouf, Maud Vanpeene, Sylvie van der Werf                                                                                                                |
| EPI_ISL_872325                                                                                                                                                                                                                                                                                                                                                                                                                 | Hopital                                                                                        | National Reference Center for Viruses of Respiratory Infections, Institut Pasteur, Paris       | Marion Barbet, Sylvie Behillil, Méline Bizard, Angela Brisebarre, Camille Capel, Etienne Simon-Lorière, Vincent Enouf, Maud Vanpeene, Sylvie van der Werf,Brichler Ségolène                                                                                              |
| EPI_ISL_872330, EPI_ISL_872331, EPI_ISL_872332, EPI_ISL_872334, EPI_ISL_872337                                                                                                                                                                                                                                                                                                                                                 | hopital                                                                                        | National Reference Center for Viruses of Respiratory Infections, Institut Pasteur, Paris       | Marion Barbet, Sylvie Behillil, Méline Bizard, Angela Brisebarre, Camille Capel, Etienne Simon-Lorière, Vincent Enouf, Maud Vanpeene, Sylvie van der Werf,Combe Patrice                                                                                                  |
| EPI_ISL_872500, EPI_ISL_872551, EPI_ISL_872553                                                                                                                                                                                                                                                                                                                                                                                 | New Mexico Department of Health Scientific Laboratory                                          | Center for Global Health, University of New Mexico Health Sciences Center                      | Daryl Domman, Kurt Schwalm, Twila Kunde, Joseph Hicks, Anastacia Griego, Michael Edwards, Darrell Dinwiddie                                                                                                                                                              |
| EPI_ISL_872781, EPI_ISL_872782, EPI_ISL_872786, EPI_ISL_872788, EPI_ISL_872793, EPI_ISL_872795, EPI_ISL_872799, EPI_ISL_872803, EPI_ISL_872805, EPI_ISL_872808, EPI_ISL_872812, EPI_ISL_872813, EPI_ISL_872816, EPI_ISL_872818, EPI_ISL_872821, EPI_ISL_872846, EPI_ISL_872848, EPI_ISL_872881, EPI_ISL_872883, EPI_ISL_872887, EPI_ISL_872888, EPI_ISL_872889, EPI_ISL_872891, EPI_ISL_872894, EPI_ISL_872895, EPI_ISL_872896 | University of Wisconsin-Madison AIDS Vaccine Research Laboratories                             | University of Wisconsin-Madison AIDS Vaccine Research Laboratories                             | Gage Moreno, Katarina Braun, et al. AIDS Vaccine Research Laboratories                                                                                                                                                                                                   |
| see above                                                                                                                                                                                                                                                                                                                                                                                                                      | University of Wisconsin-Madison AIDS Vaccine Research Laboratories                             | University of Wisconsin-Madison AIDS Vaccine Research Laboratories                             |                                                                                                                                                                                                                                                                          |
| EPI_ISL_872973, EPI_ISL_872980, EPI_ISL_872982, EPI_ISL_873029, EPI_ISL_873032, EPI_ISL_873036, EPI_ISL_873039                                                                                                                                                                                                                                                                                                                 | HELIX LLC                                                                                      | WHO National Influenza Centre Russian Federation                                               | Andrey Komissarov, Artem Fadeev, Anna Ivanova, Kseniya Komissarova, Dmitry Bazhenov, Mikhail Bakaev, Daria Danilenko, Ksenia Safina, Elena Nabieva, Georgii Bazykin, Dmitry Lioznov                                                                                      |
| EPI_ISL_873046, EPI_ISL_873090, EPI_ISL_873157                                                                                                                                                                                                                                                                                                                                                                                 | University of Michigan Clinical Microbiology Laboratory                                        | Lauring Lab, University of Michigan, Department of Microbiology and Immunology                 | Valesano                                                                                                                                                                                                                                                                 |
| EPI_ISL_873164                                                                                                                                                                                                                                                                                                                                                                                                                 | Medical Laboratory Sciences, Arab American University                                          | Medical Laboratory Sciences, Arab American University                                          | Dumaidi,k., Al-Jawabreh,A., Ereqat,S., Al-Jawabreh,H., Nasereddin,A.                                                                                                                                                                                                     |
| EPI_ISL_873184, EPI_ISL_873188, EPI_ISL_873190, EPI_ISL_873191, EPI_ISL_873192, EPI_ISL_873193                                                                                                                                                                                                                                                                                                                                 | Microbiology Division, South Carolina Department of Health and Environmental Control (SC DHEC) | Microbiology Division, South Carolina Department of Health and Environmental Control (SC DHEC) | Flores,H., Freeman,J.                                                                                                                                                                                                                                                    |
| EPI_ISL_873258, EPI_ISL_873261, EPI_ISL_873263, EPI_ISL_873264, EPI_ISL_873265, EPI_ISL_873266, EPI_ISL_873267, EPI_ISL_873268, EPI_ISL_873269                                                                                                                                                                                                                                                                                 | M Health Fairview                                                                              | Minnesota Department of Health, Public Health Laboratory                                       | Alexandra Lorentz, Jacob Garfin, Matt Plumb, and Xiong Wang                                                                                                                                                                                                              |
| EPI_ISL_873270, EPI_ISL_873271                                                                                                                                                                                                                                                                                                                                                                                                 | Minnesota Department of Health, Public Health Laboratory                                       | Minnesota Department of Health, Public Health Laboratory                                       | Alexandra Lorentz, Jacob Garfin, Matt Plumb, and Xiong Wang                                                                                                                                                                                                              |
| EPI_ISL_873281                                                                                                                                                                                                                                                                                                                                                                                                                 | Lighthouse Lab in Milton Keynes                                                                | Wellcome Sanger Institute for the COVID-19 Genomics UK (COG-UK) Consortium                     | The Lighthouse Lab in Milton Keynes and Alex Alderton, Roberto Amato, Sonia Goncalves, Ewan Harrison, David K. Jackson, Ian Johnston, Dominic Kwiatkowski, Cordelia Langford, John Sillitoe on behalf of the Wellcome Sanger Institute COVID-19 Surveillance Team        |
| EPI_ISL_873283                                                                                                                                                                                                                                                                                                                                                                                                                 | Lighthouse Lab in Cambridge                                                                    | Wellcome Sanger Institute for the COVID-19 Genomics UK (COG-UK) Consortium                     | Rob Howes, The Lighthouse Lab in Cambridge and Alex Alderton, Roberto Amato, Sonia Goncalves, Ewan Harrison, David K. Jackson, Ian Johnston, Dominic Kwiatkowski, Cordelia Langford, John Sillitoe on behalf of the Wellcome Sanger Institute COVID-19 Surveillance Team |
| EPI_ISL_873287, EPI_ISL_873296                                                                                                                                                                                                                                                                                                                                                                                                 | Lighthouse Lab in Milton Keynes                                                                | Wellcome Sanger Institute for the COVID-19 Genomics UK (COG-UK) Consortium                     | The Lighthouse Lab in Milton Keynes and Alex Alderton, Roberto Amato, Sonia Goncalves, Ewan Harrison, David K. Jackson, Ian Johnston, Dominic Kwiatkowski, Cordelia Langford, John Sillitoe on behalf of the Wellcome Sanger Institute COVID-19 Surveillance Team        |
| EPI_ISL_873297                                                                                                                                                                                                                                                                                                                                                                                                                 | Lighthouse Lab in Cambridge                                                                    | Wellcome Sanger Institute for the COVID-19 Genomics UK (COG-UK) Consortium                     | Rob Howes, The Lighthouse Lab in Cambridge and Alex Alderton, Roberto Amato, Sonia Goncalves, Ewan Harrison, David K. Jackson, Ian Johnston, Dominic Kwiatkowski, Cordelia Langford, John Sillitoe on behalf of the Wellcome Sanger Institute COVID-19 Surveillance Team |
| EPI_ISL_873298                                                                                                                                                                                                                                                                                                                                                                                                                 | Lighthouse Lab in Milton Keynes                                                                | Wellcome Sanger Institute for the COVID-19 Genomics UK (COG-UK) Consortium                     | The Lighthouse Lab in Milton Keynes and Alex Alderton, Roberto Amato, Sonia Goncalves, Ewan Harrison, David K. Jackson, Ian Johnston, Dominic Kwiatkowski, Cordelia Langford, John Sillitoe on behalf of the Wellcome Sanger Institute COVID-19 Surveillance Team        |
| EPI_ISL_873302, EPI_ISL_873304, EPI_ISL_873306, EPI_ISL_873316                                                                                                                                                                                                                                                                                                                                                                 | Lighthouse Lab in Cambridge                                                                    | Wellcome Sanger Institute for the COVID-19 Genomics UK (COG-UK) Consortium                     | Rob Howes, The Lighthouse Lab in Cambridge and Alex Alderton, Roberto Amato, Sonia Goncalves, Ewan Harrison, David K. Jackson, Ian Johnston, Dominic Kwiatkowski, Cordelia Langford, John Sillitoe on behalf of the Wellcome Sanger Institute COVID-19 Surveillance Team |
| EPI_ISL_873317, EPI_ISL_873321, EPI_ISL_873332                                                                                                                                                                                                                                                                                                                                                                                 | Lighthouse Lab in Milton Keynes                                                                | Wellcome Sanger Institute for the COVID-19 Genomics UK (COG-UK) Consortium                     | The Lighthouse Lab in Milton Keynes and Alex Alderton, Roberto Amato, Sonia Goncalves, Ewan Harrison, David K. Jackson, Ian Johnston, Dominic Kwiatkowski, Cordelia Langford, John Sillitoe on behalf of the Wellcome Sanger Institute COVID-19 Surveillance Team        |
| EPI_ISL_873339, EPI_ISL_873342, EPI_ISL_873347, EPI_ISL_873348                                                                                                                                                                                                                                                                                                                                                                 | Lighthouse Lab in Cambridge                                                                    | Wellcome Sanger Institute for the COVID-19 Genomics UK (COG-UK) Consortium                     | Rob Howes, The Lighthouse Lab in Cambridge and Alex Alderton, Roberto Amato, Sonia Goncalves, Ewan Harrison, David K. Jackson, Ian Johnston, Dominic Kwiatkowski, Cordelia Langford, John Sillitoe on behalf of the Wellcome Sanger Institute COVID-19 Surveillance Team |
| EPI_ISL_873351, EPI_ISL_873356                                                                                                                                                                                                                                                                                                                                                                                                 | Lighthouse Lab in Milton Keynes                                                                | Wellcome Sanger Institute for the COVID-19 Genomics UK (COG-UK) Consortium                     | The Lighthouse Lab in Milton Keynes and Alex Alderton, Roberto Amato, Sonia Goncalves, Ewan Harrison, David K. Jackson, Ian Johnston, Dominic Kwiatkowski, Cordelia Langford, John Sillitoe on behalf of the Wellcome Sanger Institute COVID-19 Surveillance Team        |
| EPI_ISL_873364, EPI_ISL_873365                                                                                                                                                                                                                                                                                                                                                                                                 | Lighthouse Lab in Cambridge                                                                    | Wellcome Sanger Institute for the COVID-19 Genomics UK (COG-UK) Consortium                     | Rob Howes, The Lighthouse Lab in Cambridge and Alex Alderton, Roberto Amato, Sonia Goncalves, Ewan Harrison, David K. Jackson, Ian Johnston, Dominic Kwiatkowski, Cordelia Langford, John Sillitoe on behalf of the Wellcome Sanger Institute COVID-19 Surveillance Team |
| EPI_ISL_873367, EPI_ISL_873378, EPI_ISL_873392, EPI_ISL_873394, EPI_ISL_873396, EPI_ISL_873398                                                                                                                                                                                                                                                                                                                                 | Lighthouse Lab in Milton Keynes                                                                | Wellcome Sanger Institute for the COVID-19 Genomics UK (COG-UK) Consortium                     | The Lighthouse Lab in Milton Keynes and Alex Alderton, Roberto Amato, Sonia Goncalves, Ewan Harrison, David K. Jackson, Ian Johnston, Dominic Kwiatkowski, Cordelia Langford, John Sillitoe on behalf of the Wellcome Sanger Institute COVID-19 Surveillance Team        |
| EPI_ISL_873399                                                                                                                                                                                                                                                                                                                                                                                                                 | Lighthouse Lab in Cambridge                                                                    | Wellcome Sanger Institute for the COVID-19 Genomics UK (COG-UK) Consortium                     | Rob Howes, The Lighthouse Lab in Cambridge and Alex Alderton, Roberto Amato, Sonia Goncalves, Ewan Harrison, David K. Jackson, Ian Johnston, Dominic Kwiatkowski, Cordelia Langford, John Sillitoe on behalf of the Wellcome Sanger Institute COVID-19 Surveillance Team |
| EPI_ISL_873402, EPI_ISL_873405, EPI_ISL_873406, EPI_ISL_873413, EPI_ISL_873414, EPI_ISL_873424                                                                                                                                                                                                                                                                                                                                 | Lighthouse Lab in Milton Keynes                                                                | Wellcome Sanger Institute for the COVID-19 Genomics UK (COG-UK) Consortium                     | The Lighthouse Lab in Milton Keynes and Alex Alderton, Roberto Amato, Sonia Goncalves, Ewan Harrison, David K. Jackson, Ian Johnston, Dominic Kwiatkowski, Cordelia Langford, John Sillitoe on behalf of the Wellcome Sanger Institute COVID-19 Surveillance Team        |
| EPI_ISL_873428, EPI_ISL_873431,                                                                                                                                                                                                                                                                                                                                                                                                | Lighthouse Lab in Cambridge                                                                    | Wellcome Sanger Institute for the COVID-19 Genomics UK                                         | Rob Howes, The Lighthouse Lab in Cambridge and Alex Alderton, Roberto Amato, Sonia Goncalves, Ewan Harrison, David K. Jackson, Ian Johnston,                                                                                                                             |



[illegible]





[illegible]

[illegible]

[illegible]

[illegible]

[illegible]



[illegible]

[illegible]

[illegible]

[illegible]

[illegible]

[illegible]



|                                                                                                                                                                                                                                                                                                                                                                                |                                                                                |                                                                                  |                                                                                                                                                     |
|--------------------------------------------------------------------------------------------------------------------------------------------------------------------------------------------------------------------------------------------------------------------------------------------------------------------------------------------------------------------------------|--------------------------------------------------------------------------------|----------------------------------------------------------------------------------|-----------------------------------------------------------------------------------------------------------------------------------------------------|
| EPI_ISL_882642, EPI_ISL_882643                                                                                                                                                                                                                                                                                                                                                 | Genetics<br>Azerbaijan National Hematology Center Division of Medical Genetics | Genetics<br>Azerbaijan National Hematology Center Division of Medical Genetics   | Aghayev Agha Rza                                                                                                                                    |
| EPI_ISL_882665                                                                                                                                                                                                                                                                                                                                                                 | Unidade de Pronto Atendimento Dra Zilda Arns                                   | Instituto Adolfo Lutz, Interdisciplinary Procedures Center, Strategic Laboratory | Claudio Tavares Sacchi, Claudia Regina Gonçalves, Erica Valesa Ramos Gomes, Karoline Rodrigues Campos                                               |
| EPI_ISL_882670                                                                                                                                                                                                                                                                                                                                                                 | Hospital Samaritano Paulista                                                   | Instituto Adolfo Lutz, Interdisciplinary Procedures Center, Strategic Laboratory | Claudio Tavares Sacchi, Claudia Regina Gonçalves, Erica Valesa Ramos Gomes, Karoline Rodrigues Campos                                               |
| EPI_ISL_882671, EPI_ISL_882672                                                                                                                                                                                                                                                                                                                                                 | Hospital Municipal Dr. Guido Guida                                             | Instituto Adolfo Lutz, Interdisciplinary Procedures Center, Strategic Laboratory | Claudio Tavares Sacchi, Claudia Regina Gonçalves, Erica Valesa Ramos Gomes, Karoline Rodrigues Campos                                               |
| EPI_ISL_882919                                                                                                                                                                                                                                                                                                                                                                 | INMI Lazzaro Spallanzani IRCCS                                                 | INMI Lazzaro Spallanzani IRCCS                                                   | C.E.M Gruber, B Bartolini, E Giombini, M Rueca, O Butera, F Messina, A Di Caro, MR Capobianchi                                                      |
| EPI_ISL_882920                                                                                                                                                                                                                                                                                                                                                                 | INMI Lazzaro Spallanzani IRCCS                                                 | INMI Lazzaro Spallanzani IRCCS                                                   | M Rueca, E Giombini, C.E.M Gruber, B Bartolini, O Butera, F Messina, A Di Caro, MR Capobianchi                                                      |
| EPI_ISL_882922                                                                                                                                                                                                                                                                                                                                                                 | Sant'Eugenio/CTO ASL Roma 2                                                    | INMI Lazzaro Spallanzani IRCCS                                                   | E Giombini, M Rueca, B Bartolini, O Butera, C.E.M Gruber, F Messina, F Bondanini, GC Coccioilillo, C Disegni, MR Capobianchi, A Di Caro             |
| EPI_ISL_882926                                                                                                                                                                                                                                                                                                                                                                 | INMI Lazzaro Spallanzani IRCCS                                                 | INMI Lazzaro Spallanzani IRCCS                                                   | B Bartolini, O Butera, C.E.M Gruber, M Rueca, F Messina, E Giombini, MR Capobianchi, A Di Caro                                                      |
| EPI_ISL_882927                                                                                                                                                                                                                                                                                                                                                                 | INMI Lazzaro Spallanzani IRCCS                                                 | INMI Lazzaro Spallanzani IRCCS                                                   | M Rueca, E Giombini, C.E.M Gruber, B Bartolini, O Butera, F Messina, A Di Caro, MR Capobianchi                                                      |
| EPI_ISL_882928                                                                                                                                                                                                                                                                                                                                                                 | INMI Lazzaro Spallanzani IRCCS                                                 | INMI Lazzaro Spallanzani IRCCS                                                   | F Messina, O Butera, E Giombini, M Rueca, B Bartolini, C.E.M Gruber, MR Capobianchi, A Di Caro                                                      |
| EPI_ISL_882929                                                                                                                                                                                                                                                                                                                                                                 | INMI Lazzaro Spallanzani IRCCS                                                 | INMI Lazzaro Spallanzani IRCCS                                                   | C.E.M Gruber, B Bartolini, E Giombini, M Rueca, O Butera, F Messina, A Di Caro, MR Capobianchi                                                      |
| EPI_ISL_882930                                                                                                                                                                                                                                                                                                                                                                 | INMI Lazzaro Spallanzani IRCCS                                                 | INMI Lazzaro Spallanzani IRCCS                                                   | E Giombini, M. Rueca, B Bartolini, O Butera, C.E.M Gruber, F Messina, MR Capobianchi, A Di Caro                                                     |
| EPI_ISL_882931                                                                                                                                                                                                                                                                                                                                                                 | INMI Lazzaro Spallanzani IRCCS                                                 | INMI Lazzaro Spallanzani IRCCS                                                   | B Bartolini, O Butera, C.E.M Gruber, M Rueca, F Messina, E Giombini, MR Capobianchi, A Di Caro                                                      |
| EPI_ISL_882932                                                                                                                                                                                                                                                                                                                                                                 | INMI Lazzaro Spallanzani IRCCS                                                 | INMI Lazzaro Spallanzani IRCCS                                                   | F Messina, O Butera, E Giombini, M Rueca, B Bartolini, C.E.M Gruber, MR Capobianchi, A Di Caro                                                      |
| EPI_ISL_882933                                                                                                                                                                                                                                                                                                                                                                 | Sant'Eugenio/CTO ASL Roma 2                                                    | INMI Lazzaro Spallanzani IRCCS                                                   | E Giombini, M. Rueca, B Bartolini, O Butera, C.E.M Gruber, F Bondanini, GC Coccioilillo, C Disegni, F Messina, MR Capobianchi, A Di Caro            |
| EPI_ISL_882934                                                                                                                                                                                                                                                                                                                                                                 | Sant'Eugenio/CTO ASL Roma 2                                                    | INMI Lazzaro Spallanzani IRCCS                                                   | B Bartolini, O Butera, C.E.M Gruber, M Rueca, F Messina, E Giombini, MR Capobianchi, A Di Caro                                                      |
| EPI_ISL_882935                                                                                                                                                                                                                                                                                                                                                                 | Sant'Eugenio/CTO ASL Roma 2                                                    | INMI Lazzaro Spallanzani IRCCS                                                   | F Messina, O Butera, E Giombini, M Rueca, B Bartolini, C.E.M Gruber, F Bondanini, C Disegni, GC Coccioilillo, MR Capobianchi, A Di Caro             |
| EPI_ISL_882936                                                                                                                                                                                                                                                                                                                                                                 | Sant'Eugenio/CTO ASL Roma 2                                                    | INMI Lazzaro Spallanzani IRCCS                                                   | E Giombini, M Rueca, B Bartolini, O Butera, C.E.M Gruber, F Messina, F Bondanini, GC Coccioilillo, C Disegni, MR Capobianchi, A Di Caro             |
| EPI_ISL_882937                                                                                                                                                                                                                                                                                                                                                                 | Azienda Ospedaliera San Giovanni Addolorata                                    | INMI Lazzaro Spallanzani IRCCS                                                   | F Messina, O Butera, E Giombini, M Rueca, B Bartolini, C.E.M Gruber, M Gaudio, PM Placanica, MR Capobianchi, A Di Caro                              |
| EPI_ISL_882939                                                                                                                                                                                                                                                                                                                                                                 | Azienda Ospedaliera San Giovanni Addolorata                                    | INMI Lazzaro Spallanzani IRCCS                                                   | B Bartolini, O Butera, C.E.M Gruber, M Rueca, F Messina, E Giombini, M Gaudio, PM Placanica, MR Capobianchi, A Di Caro                              |
| EPI_ISL_882940                                                                                                                                                                                                                                                                                                                                                                 | Ospedale San Camillo De Lellis Rieti                                           | INMI Lazzaro Spallanzani IRCCS                                                   | M Rueca, E Giombini, C.E.M Gruber, B Bartolini, O Butera, S Venarubea, A De Luca, L Casertano, F Messina, A Di Caro, MR Capobianchi                 |
| EPI_ISL_882942                                                                                                                                                                                                                                                                                                                                                                 | Ospedale San Camillo De Lellis Rieti                                           | INMI Lazzaro Spallanzani IRCCS                                                   | M Rueca, E Giombini, C.E.M Gruber, B Bartolini, O Butera, F Messina, S Venarubea, A De Luca, L Casertano, A Di Caro, MR Capobianchi                 |
| EPI_ISL_882943, EPI_ISL_882944, EPI_ISL_882945, EPI_ISL_882946, EPI_ISL_882947, EPI_ISL_882948                                                                                                                                                                                                                                                                                 | The National Institute of Public Health                                        | State Veterinary Institute Prague                                                | Nagy A,Jirincova,H;Vecerova,JTrnka,D                                                                                                                |
| EPI_ISL_882967, EPI_ISL_882970, EPI_ISL_882973, EPI_ISL_882974, EPI_ISL_882975, EPI_ISL_882979, EPI_ISL_882980, EPI_ISL_882981, EPI_ISL_882982, EPI_ISL_882983, EPI_ISL_882984                                                                                                                                                                                                 |                                                                                |                                                                                  |                                                                                                                                                     |
| see above                                                                                                                                                                                                                                                                                                                                                                      | UCLA Clinical Micro Lab                                                        | Los Angeles County PHL                                                           | P. Hemarajata et al.                                                                                                                                |
| EPI_ISL_882997, EPI_ISL_882998                                                                                                                                                                                                                                                                                                                                                 | Motion Picture Television Fund Hospital Lab                                    | Los Angeles County PHL                                                           | P. Hemarajata et al.                                                                                                                                |
| EPI_ISL_882999, EPI_ISL_883000, EPI_ISL_883001, EPI_ISL_883002, EPI_ISL_883004, EPI_ISL_883005, EPI_ISL_883011, EPI_ISL_883015, EPI_ISL_883018, EPI_ISL_883019, EPI_ISL_883020, EPI_ISL_883021, EPI_ISL_883022, EPI_ISL_883023, EPI_ISL_883024, EPI_ISL_883025, EPI_ISL_883026, EPI_ISL_883027, EPI_ISL_883028, EPI_ISL_883029, EPI_ISL_883030, EPI_ISL_883031, EPI_ISL_883032 |                                                                                |                                                                                  |                                                                                                                                                     |
| see above                                                                                                                                                                                                                                                                                                                                                                      | Maryland Public Health Laboratory                                              | Maryland Public Health Laboratory                                                | Maryland Department of Health Laboratories Administration                                                                                           |
| EPI_ISL_883288, EPI_ISL_883289                                                                                                                                                                                                                                                                                                                                                 | SIESP CHIETI-DRIVE IN ORTONA                                                   | Istituto Zooprofilattico Sperimentale dell'Abruzzo e Molise "G. Caporale"        | Lorusso A, Marcacci M, Di Domenico M, Ancora M, Curini V, Mangone I, Rinaldi A, Scialabba S, Di Pasquale A, Cammà C, Puglia I, Calistri P, Savini G |
| EPI_ISL_883290                                                                                                                                                                                                                                                                                                                                                                 | SIESP CHIETI-DRIVE IN CHIETI                                                   | Istituto Zooprofilattico Sperimentale dell'Abruzzo e Molise "G. Caporale"        | Lorusso A, Marcacci M, Di Domenico M, Ancora M, Curini V, Mangone I, Rinaldi A, Scialabba S, Di Pasquale A, Cammà C, Puglia I, Calistri P, Savini G |
| EPI_ISL_883292                                                                                                                                                                                                                                                                                                                                                                 | SIESP CHIETI-DRIVE IN ORTONA                                                   | Istituto Zooprofilattico Sperimentale dell'Abruzzo e Molise "G. Caporale"        | Lorusso A, Marcacci M, Di Domenico M, Ancora M, Curini V, Mangone I, Rinaldi A, Scialabba S, Di Pasquale A, Cammà C, Puglia I, Calistri P, Savini G |
| EPI_ISL_883294, EPI_ISL_883295, EPI_ISL_883297                                                                                                                                                                                                                                                                                                                                 | RP Guardagrele-Ospedale di Comunità                                            | Istituto Zooprofilattico Sperimentale dell'Abruzzo e Molise "G. Caporale"        | Lorusso A, Marcacci M, Di Domenico M, Ancora M, Curini V, Mangone I, Rinaldi A, Scialabba S, Di Pasquale A, Cammà C, Puglia I, Calistri P, Savini G |
| EPI_ISL_883299, EPI_ISL_883304, EPI_ISL_883305                                                                                                                                                                                                                                                                                                                                 | SIESP DIPARTIMENTO DI PREVENZIONE CHIE                                         | Istituto Zooprofilattico Sperimentale dell'Abruzzo e Molise "G. Caporale"        | Lorusso A, Marcacci M, Di Domenico M, Ancora M, Curini V, Mangone I, Rinaldi A, Scialabba S, Di Pasquale A, Cammà C, Puglia I, Calistri P, Savini G |
| EPI_ISL_883317                                                                                                                                                                                                                                                                                                                                                                 | Pandemic Response Laboratory                                                   | New York City Public Health Laboratory                                           | Jade Wang, et al.                                                                                                                                   |
| EPI_ISL_883318, EPI_ISL_883319, EPI_ISL_883320, EPI_ISL_883321, EPI_ISL_883322, EPI_ISL_883323                                                                                                                                                                                                                                                                                 | DOHMH Jamaica                                                                  | New York City Public Health Laboratory                                           | Jade Wang, et al.                                                                                                                                   |
| EPI_ISL_883327                                                                                                                                                                                                                                                                                                                                                                 | DOHMH Central Harlem                                                           | New York City Public Health Laboratory                                           | Jade Wang, et al.                                                                                                                                   |
| EPI_ISL_883328                                                                                                                                                                                                                                                                                                                                                                 | OCME Office Of Chief Medical Examiner                                          | New York City Public Health Laboratory                                           | Jade Wang, et al.                                                                                                                                   |
| EPI_ISL_883332                                                                                                                                                                                                                                                                                                                                                                 | Department of Homeless Services                                                | New York City Public Health Laboratory                                           | Jade Wang, et al.                                                                                                                                   |
| EPI_ISL_883333, EPI_ISL_883334                                                                                                                                                                                                                                                                                                                                                 | DOHMH Riverside                                                                | New York City Public Health Laboratory                                           | Jade Wang, et al.                                                                                                                                   |
| EPI_ISL_883337                                                                                                                                                                                                                                                                                                                                                                 | DOHMH Crown Heights                                                            | New York City Public Health Laboratory                                           | Jade Wang, et al.                                                                                                                                   |
| EPI_ISL_883338                                                                                                                                                                                                                                                                                                                                                                 | DOHMH Morrisania                                                               | New York City Public Health Laboratory                                           | Jade Wang, et al.                                                                                                                                   |
| EPI_ISL_883339                                                                                                                                                                                                                                                                                                                                                                 | DOHMH Chelsea                                                                  | New York City Public Health Laboratory                                           | Jade Wang, et al.                                                                                                                                   |
| EPI_ISL_883340, EPI_ISL_883341, EPI_ISL_883343                                                                                                                                                                                                                                                                                                                                 | DOHMH PHL                                                                      | New York City Public Health Laboratory                                           | Jade Wang, et al.                                                                                                                                   |
| EPI_ISL_883345, EPI_ISL_883352, EPI_ISL_883353                                                                                                                                                                                                                                                                                                                                 | OCME Office Of Chief Medical Examiner                                          | New York City Public Health Laboratory                                           | Jade Wang, et al.                                                                                                                                   |
| EPI_ISL_883354, EPI_ISL_883355, EPI_ISL_883356                                                                                                                                                                                                                                                                                                                                 | DOHMH Corona                                                                   | New York City Public Health Laboratory                                           | Jade Wang, et al.                                                                                                                                   |
| EPI_ISL_883357, EPI_ISL_883358, EPI_ISL_883360                                                                                                                                                                                                                                                                                                                                 | DOHMH Crown Heights                                                            | New York City Public Health Laboratory                                           | Jade Wang, et al.                                                                                                                                   |



|                                                                                                                                                                                                                                                                                                                                                                                                                                                                                                                                                                                                                                                                                                                                                                                                                                                                                                                                                |                                                                        |                                                                                          |                                                                                                                                                                                                                                                                                                                                                                                                                                  |
|------------------------------------------------------------------------------------------------------------------------------------------------------------------------------------------------------------------------------------------------------------------------------------------------------------------------------------------------------------------------------------------------------------------------------------------------------------------------------------------------------------------------------------------------------------------------------------------------------------------------------------------------------------------------------------------------------------------------------------------------------------------------------------------------------------------------------------------------------------------------------------------------------------------------------------------------|------------------------------------------------------------------------|------------------------------------------------------------------------------------------|----------------------------------------------------------------------------------------------------------------------------------------------------------------------------------------------------------------------------------------------------------------------------------------------------------------------------------------------------------------------------------------------------------------------------------|
| EPI_ISL_883361, EPI_ISL_883362, EPI_ISL_883363                                                                                                                                                                                                                                                                                                                                                                                                                                                                                                                                                                                                                                                                                                                                                                                                                                                                                                 | DOHMH PHL                                                              | New York City Public Health Laboratory                                                   | Jade Wang, et al.                                                                                                                                                                                                                                                                                                                                                                                                                |
| EPI_ISL_883365, EPI_ISL_883366, EPI_ISL_883367                                                                                                                                                                                                                                                                                                                                                                                                                                                                                                                                                                                                                                                                                                                                                                                                                                                                                                 | DOHMH Morrisania                                                       | New York City Public Health Laboratory                                                   | Jade Wang, et al.                                                                                                                                                                                                                                                                                                                                                                                                                |
| EPI_ISL_883368                                                                                                                                                                                                                                                                                                                                                                                                                                                                                                                                                                                                                                                                                                                                                                                                                                                                                                                                 | DOHMH Chelsea                                                          | New York City Public Health Laboratory                                                   | Jade Wang, et al.                                                                                                                                                                                                                                                                                                                                                                                                                |
| EPI_ISL_883371, EPI_ISL_883372                                                                                                                                                                                                                                                                                                                                                                                                                                                                                                                                                                                                                                                                                                                                                                                                                                                                                                                 | DOHMH Central Harlem                                                   | New York City Public Health Laboratory                                                   | Jade Wang, et al.                                                                                                                                                                                                                                                                                                                                                                                                                |
| EPI_ISL_883373                                                                                                                                                                                                                                                                                                                                                                                                                                                                                                                                                                                                                                                                                                                                                                                                                                                                                                                                 | DOHMH Jamaica                                                          | New York City Public Health Laboratory                                                   | Jade Wang, et al.                                                                                                                                                                                                                                                                                                                                                                                                                |
| EPI_ISL_883376, EPI_ISL_883377, EPI_ISL_883378                                                                                                                                                                                                                                                                                                                                                                                                                                                                                                                                                                                                                                                                                                                                                                                                                                                                                                 | DOHMH Central Harlem                                                   | New York City Public Health Laboratory                                                   | Jade Wang, et al.                                                                                                                                                                                                                                                                                                                                                                                                                |
| EPI_ISL_883380, EPI_ISL_883382                                                                                                                                                                                                                                                                                                                                                                                                                                                                                                                                                                                                                                                                                                                                                                                                                                                                                                                 | DOHMH PHL                                                              | New York City Public Health Laboratory                                                   | Jade Wang, et al.                                                                                                                                                                                                                                                                                                                                                                                                                |
| EPI_ISL_883384, EPI_ISL_883389                                                                                                                                                                                                                                                                                                                                                                                                                                                                                                                                                                                                                                                                                                                                                                                                                                                                                                                 | Pandemic Response Laboratory                                           | New York City Public Health Laboratory                                                   | Jade Wang, et al.                                                                                                                                                                                                                                                                                                                                                                                                                |
| EPI_ISL_883391, EPI_ISL_883392, EPI_ISL_883394                                                                                                                                                                                                                                                                                                                                                                                                                                                                                                                                                                                                                                                                                                                                                                                                                                                                                                 | OCME Office Of Chief Medical Examiner                                  | New York City Public Health Laboratory                                                   | Jade Wang, et al.                                                                                                                                                                                                                                                                                                                                                                                                                |
| EPI_ISL_883396                                                                                                                                                                                                                                                                                                                                                                                                                                                                                                                                                                                                                                                                                                                                                                                                                                                                                                                                 | Department of Homeless Services                                        | New York City Public Health Laboratory                                                   | Jade Wang, et al.                                                                                                                                                                                                                                                                                                                                                                                                                |
| EPI_ISL_883398, EPI_ISL_883400, EPI_ISL_883402, EPI_ISL_883404, EPI_ISL_883405, EPI_ISL_883407                                                                                                                                                                                                                                                                                                                                                                                                                                                                                                                                                                                                                                                                                                                                                                                                                                                 | OCME Office Of Chief Medical Examiner                                  | New York City Public Health Laboratory                                                   | Jade Wang, et al.                                                                                                                                                                                                                                                                                                                                                                                                                |
| EPI_ISL_883409                                                                                                                                                                                                                                                                                                                                                                                                                                                                                                                                                                                                                                                                                                                                                                                                                                                                                                                                 | DOHMH Central Harlem                                                   | New York City Public Health Laboratory                                                   | Jade Wang, et al.                                                                                                                                                                                                                                                                                                                                                                                                                |
| EPI_ISL_883410                                                                                                                                                                                                                                                                                                                                                                                                                                                                                                                                                                                                                                                                                                                                                                                                                                                                                                                                 | DOHMH Corona                                                           | New York City Public Health Laboratory                                                   | Jade Wang, et al.                                                                                                                                                                                                                                                                                                                                                                                                                |
| EPI_ISL_883412                                                                                                                                                                                                                                                                                                                                                                                                                                                                                                                                                                                                                                                                                                                                                                                                                                                                                                                                 | DOHMH Crown Heights                                                    | New York City Public Health Laboratory                                                   | Jade Wang, et al.                                                                                                                                                                                                                                                                                                                                                                                                                |
| EPI_ISL_883413, EPI_ISL_883414                                                                                                                                                                                                                                                                                                                                                                                                                                                                                                                                                                                                                                                                                                                                                                                                                                                                                                                 | DOHMH Central Harlem                                                   | New York City Public Health Laboratory                                                   | Jade Wang, et al.                                                                                                                                                                                                                                                                                                                                                                                                                |
| EPI_ISL_883417                                                                                                                                                                                                                                                                                                                                                                                                                                                                                                                                                                                                                                                                                                                                                                                                                                                                                                                                 | DOHMH Fort Greene                                                      | New York City Public Health Laboratory                                                   | Jade Wang, et al.                                                                                                                                                                                                                                                                                                                                                                                                                |
| EPI_ISL_883418, EPI_ISL_883420, EPI_ISL_883421, EPI_ISL_883422, EPI_ISL_883423                                                                                                                                                                                                                                                                                                                                                                                                                                                                                                                                                                                                                                                                                                                                                                                                                                                                 | DOHMH Jamaica                                                          | New York City Public Health Laboratory                                                   | Jade Wang, et al.                                                                                                                                                                                                                                                                                                                                                                                                                |
| EPI_ISL_883435                                                                                                                                                                                                                                                                                                                                                                                                                                                                                                                                                                                                                                                                                                                                                                                                                                                                                                                                 | NORTHWELL HEALTH LABORATORIES                                          | Wadsworth Center, New York State Department of Health                                    | Kirsten St. George, Daryl M. Lamson, Alexis Russel, Matthew Shudt, Melissa A Leisner, Jonathan Plitnick, Navjot Singh, John Kelly, Erasmus Schneider, Erica Lasek-Nesselquist                                                                                                                                                                                                                                                    |
| EPI_ISL_883436, EPI_ISL_883438, EPI_ISL_883441, EPI_ISL_883443                                                                                                                                                                                                                                                                                                                                                                                                                                                                                                                                                                                                                                                                                                                                                                                                                                                                                 | ADIRONDACK MEDICAL CENTER                                              | Wadsworth Center, New York State Department of Health                                    | Kirsten St. George, Daryl M. Lamson, Alexis Russel, Matthew Shudt, Melissa A Leisner, Jonathan Plitnick, Navjot Singh, John Kelly, Erasmus Schneider, Erica Lasek-Nesselquist                                                                                                                                                                                                                                                    |
| EPI_ISL_883450, EPI_ISL_883460, EPI_ISL_883466, EPI_ISL_883468, EPI_ISL_883469                                                                                                                                                                                                                                                                                                                                                                                                                                                                                                                                                                                                                                                                                                                                                                                                                                                                 | NORTHWELL HEALTH LABORATORIES                                          | Wadsworth Center, New York State Department of Health                                    | Kirsten St. George, Daryl M. Lamson, Alexis Russel, Matthew Shudt, Melissa A Leisner, Jonathan Plitnick, Navjot Singh, John Kelly, Erasmus Schneider, Erica Lasek-Nesselquist                                                                                                                                                                                                                                                    |
| EPI_ISL_883473                                                                                                                                                                                                                                                                                                                                                                                                                                                                                                                                                                                                                                                                                                                                                                                                                                                                                                                                 | ADIRONDACK MEDICAL CENTER                                              | Wadsworth Center, New York State Department of Health                                    | Kirsten St. George, Daryl M. Lamson, Alexis Russel, Matthew Shudt, Melissa A Leisner, Jonathan Plitnick, Navjot Singh, John Kelly, Erasmus Schneider, Erica Lasek-Nesselquist                                                                                                                                                                                                                                                    |
| EPI_ISL_883482, EPI_ISL_883487, EPI_ISL_883488, EPI_ISL_883489, EPI_ISL_883492, EPI_ISL_883493, EPI_ISL_883495                                                                                                                                                                                                                                                                                                                                                                                                                                                                                                                                                                                                                                                                                                                                                                                                                                 | NORTHWELL HEALTH LABORATORIES                                          | Wadsworth Center, New York State Department of Health                                    | Kirsten St. George, Daryl M. Lamson, Alexis Russel, Matthew Shudt, Melissa A Leisner, Jonathan Plitnick, Navjot Singh, John Kelly, Erasmus Schneider, Erica Lasek-Nesselquist                                                                                                                                                                                                                                                    |
| EPI_ISL_884000                                                                                                                                                                                                                                                                                                                                                                                                                                                                                                                                                                                                                                                                                                                                                                                                                                                                                                                                 | Labo Analyses Med                                                      | National Reference Center for Viruses of Respiratory Infections, Institut Pasteur, Paris | Marion Barbet, Sylvie Behillil, Méline Bizard, Angela Brisebarre, Camille Capel, Etienne Simon-Lorière, Vincent Enouf, Maud Vanpeene, Sylvie van der Werf,Rousset Dominique                                                                                                                                                                                                                                                      |
| EPI_ISL_884011                                                                                                                                                                                                                                                                                                                                                                                                                                                                                                                                                                                                                                                                                                                                                                                                                                                                                                                                 | ALBANY MEDICAL CENTER HOSPITAL CLINICAL LABORATORIES                   | Wadsworth Center, New York State Department of Health                                    | Kirsten St. George, Daryl M. Lamson, Alexis Russel, Matthew Shudt, Melissa A Leisner, Jonathan Plitnick, Navjot Singh, John Kelly, Erasmus Schneider, Erica Lasek-Nesselquist                                                                                                                                                                                                                                                    |
| EPI_ISL_884013, EPI_ISL_884016                                                                                                                                                                                                                                                                                                                                                                                                                                                                                                                                                                                                                                                                                                                                                                                                                                                                                                                 | Wadsworth Center, New York State Department of Health                  | Wadsworth Center, New York State Department of Health                                    | Kirsten St. George, Daryl M. Lamson, Alexis Russel, Matthew Shudt, Melissa A Leisner, Jonathan Plitnick, Navjot Singh, John Kelly, Erasmus Schneider, Erica Lasek-Nesselquist                                                                                                                                                                                                                                                    |
| EPI_ISL_884025, EPI_ISL_884027                                                                                                                                                                                                                                                                                                                                                                                                                                                                                                                                                                                                                                                                                                                                                                                                                                                                                                                 | ALBANY MEDICAL CENTER HOSPITAL CLINICAL LABORATORIES                   | Wadsworth Center, New York State Department of Health                                    | Kirsten St. George, Daryl M. Lamson, Alexis Russel, Matthew Shudt, Melissa A Leisner, Jonathan Plitnick, Navjot Singh, John Kelly, Erasmus Schneider, Erica Lasek-Nesselquist                                                                                                                                                                                                                                                    |
| EPI_ISL_884032, EPI_ISL_884033, EPI_ISL_884034, EPI_ISL_884041, EPI_ISL_884047                                                                                                                                                                                                                                                                                                                                                                                                                                                                                                                                                                                                                                                                                                                                                                                                                                                                 | Wadsworth Center, New York State Department of Health                  | Wadsworth Center, New York State Department of Health                                    | Kirsten St. George, Daryl M. Lamson, Alexis Russel, Matthew Shudt, Melissa A Leisner, Jonathan Plitnick, Navjot Singh, John Kelly, Erasmus Schneider, Erica Lasek-Nesselquist                                                                                                                                                                                                                                                    |
| EPI_ISL_884054                                                                                                                                                                                                                                                                                                                                                                                                                                                                                                                                                                                                                                                                                                                                                                                                                                                                                                                                 | TEMPUS LABS INC                                                        | Wadsworth Center, New York State Department of Health                                    | Kirsten St. George, Daryl M. Lamson, Alexis Russel, Matthew Shudt, Melissa A Leisner, Jonathan Plitnick, Navjot Singh, John Kelly, Erasmus Schneider, Erica Lasek-Nesselquist                                                                                                                                                                                                                                                    |
| EPI_ISL_884058                                                                                                                                                                                                                                                                                                                                                                                                                                                                                                                                                                                                                                                                                                                                                                                                                                                                                                                                 | Wadsworth Center, New York State Department of Health                  | Wadsworth Center, New York State Department of Health                                    | Kirsten St. George, Daryl M. Lamson, Alexis Russel, Matthew Shudt, Melissa A Leisner, Jonathan Plitnick, Navjot Singh, John Kelly, Erasmus Schneider, Erica Lasek-Nesselquist                                                                                                                                                                                                                                                    |
| EPI_ISL_884089, EPI_ISL_884091, EPI_ISL_884092, EPI_ISL_884093, EPI_ISL_884095, EPI_ISL_884097, EPI_ISL_884098, EPI_ISL_884099, EPI_ISL_884100, EPI_ISL_884101, EPI_ISL_884102, EPI_ISL_884103, EPI_ISL_884104, EPI_ISL_884105, EPI_ISL_884106, EPI_ISL_884107, EPI_ISL_884108, EPI_ISL_884109, EPI_ISL_884110, EPI_ISL_884111, EPI_ISL_884112, EPI_ISL_884113, EPI_ISL_884114, EPI_ISL_884115, EPI_ISL_884116, EPI_ISL_884117, EPI_ISL_884118, EPI_ISL_884119, EPI_ISL_884120, EPI_ISL_884121, EPI_ISL_884122, EPI_ISL_884123, EPI_ISL_884124, EPI_ISL_884125, EPI_ISL_884126, EPI_ISL_884127, EPI_ISL_884128, EPI_ISL_884129, EPI_ISL_884130, EPI_ISL_884131, EPI_ISL_884132, EPI_ISL_884133, EPI_ISL_884134, EPI_ISL_884135, EPI_ISL_884136, EPI_ISL_884137, EPI_ISL_884138, EPI_ISL_884139, EPI_ISL_884140, EPI_ISL_884141, EPI_ISL_884142, EPI_ISL_884143, EPI_ISL_884144, EPI_ISL_884145, EPI_ISL_884146, EPI_ISL_884147, EPI_ISL_884148 |                                                                        |                                                                                          |                                                                                                                                                                                                                                                                                                                                                                                                                                  |
| see above                                                                                                                                                                                                                                                                                                                                                                                                                                                                                                                                                                                                                                                                                                                                                                                                                                                                                                                                      | Eurofins Diatherix                                                     | Hudsonalpha Genome Sequencing Center                                                     | Jane Grimwood, Melissa Williams, Lori H. Handley, Joshua Stough, Leslie Malone, Stefan Brzezinski, Ada Stewart, Teresa Jones, Jenell Webber, John Lovell, Jennifer Cart, and Jeremy Schmutz                                                                                                                                                                                                                                      |
| EPI_ISL_884582, EPI_ISL_884588, EPI_ISL_884609, EPI_ISL_884611, EPI_ISL_884622, EPI_ISL_884627, EPI_ISL_884652, EPI_ISL_884656, EPI_ISL_884657, EPI_ISL_884659, EPI_ISL_884660, EPI_ISL_884671, EPI_ISL_884691, EPI_ISL_884707, EPI_ISL_884726, EPI_ISL_884752, EPI_ISL_884760, EPI_ISL_884776, EPI_ISL_884777, EPI_ISL_884780                                                                                                                                                                                                                                                                                                                                                                                                                                                                                                                                                                                                                 |                                                                        |                                                                                          |                                                                                                                                                                                                                                                                                                                                                                                                                                  |
| see above                                                                                                                                                                                                                                                                                                                                                                                                                                                                                                                                                                                                                                                                                                                                                                                                                                                                                                                                      | Respiratory Viruses Branch, Centers for Disease Control and Prevention | Respiratory Viruses Branch, Centers for Disease Control and Prevention                   | Cook,P.W., Batra,D., Rambo-Martin,B.L., de Feo,E., Antico,J., Tran,C., Tolentino,M., Wickline,S., Gietzen,K., Sickler,B., Liu,J., Allen,E., Febbo,P., Galloway,S., Washington,N.L., White,S., Levan,G., Barret,K.S., Cirulli,E., Bolze,A., Ascencio,A., Rivera-Garcia,C., Cho,R., Nguyen,J., Wang,S., Ramirez,J., Cassens,T., Sandoval,E., Isaksson,M., Lee,W., Becker,D., Laurent,M., Lu,J., Paden,C.R., Tong,S., MacCannell,D. |
| EPI_ISL_884860                                                                                                                                                                                                                                                                                                                                                                                                                                                                                                                                                                                                                                                                                                                                                                                                                                                                                                                                 | Bacteriology, Georgia Public Health Laboratory (GPHL)                  | Bacteriology, Georgia Public Health Laboratory (GPHL)                                    | Reeves,S., Edwards,J., Dixey,C., Parrott,T.                                                                                                                                                                                                                                                                                                                                                                                      |
| EPI_ISL_885022, EPI_ISL_885028, EPI_ISL_885029, EPI_ISL_885037, EPI_ISL_885038                                                                                                                                                                                                                                                                                                                                                                                                                                                                                                                                                                                                                                                                                                                                                                                                                                                                 | Santa Clara County Public Health Laboratory                            | Chan-Zuckerberg Biohub                                                                   | CZB Ciliahub Consortium                                                                                                                                                                                                                                                                                                                                                                                                          |
| EPI_ISL_885143                                                                                                                                                                                                                                                                                                                                                                                                                                                                                                                                                                                                                                                                                                                                                                                                                                                                                                                                 | Central public health laboratory                                       | Molecular Diagnostics Department, Central public health laboratory                       | Dier,H., Dlishad,H., Furat,S., Sharmeen,F.-A., Dalia,F., Mohsen,A.,Hermdad,A., Fahmi,A., Hemn,M. and Idrees,H.                                                                                                                                                                                                                                                                                                                   |



|                                                                                                                                                                                                                                                                                                                                                                                                                                                                                                                                                                                                                                                                                                                                                                                                                                                                                                                                                                                                                                                                                                                                                                                                                                                                                                                                                                                                                                                                                                                                                                                                                                                                                                                                                                                                                                                                                                                                                                                                                                                                                                                                                                                                                                                                                                                                                                                                                                                                                                                                                                                                                                                                |                                                                                                                          |                                                                                                                              |                                                                                                                                                                                                                                                                                                                                                                                                                                                                      |                                                                                                                                                                                                                                                        |
|----------------------------------------------------------------------------------------------------------------------------------------------------------------------------------------------------------------------------------------------------------------------------------------------------------------------------------------------------------------------------------------------------------------------------------------------------------------------------------------------------------------------------------------------------------------------------------------------------------------------------------------------------------------------------------------------------------------------------------------------------------------------------------------------------------------------------------------------------------------------------------------------------------------------------------------------------------------------------------------------------------------------------------------------------------------------------------------------------------------------------------------------------------------------------------------------------------------------------------------------------------------------------------------------------------------------------------------------------------------------------------------------------------------------------------------------------------------------------------------------------------------------------------------------------------------------------------------------------------------------------------------------------------------------------------------------------------------------------------------------------------------------------------------------------------------------------------------------------------------------------------------------------------------------------------------------------------------------------------------------------------------------------------------------------------------------------------------------------------------------------------------------------------------------------------------------------------------------------------------------------------------------------------------------------------------------------------------------------------------------------------------------------------------------------------------------------------------------------------------------------------------------------------------------------------------------------------------------------------------------------------------------------------------|--------------------------------------------------------------------------------------------------------------------------|------------------------------------------------------------------------------------------------------------------------------|----------------------------------------------------------------------------------------------------------------------------------------------------------------------------------------------------------------------------------------------------------------------------------------------------------------------------------------------------------------------------------------------------------------------------------------------------------------------|--------------------------------------------------------------------------------------------------------------------------------------------------------------------------------------------------------------------------------------------------------|
| EPI_ISL_888818                                                                                                                                                                                                                                                                                                                                                                                                                                                                                                                                                                                                                                                                                                                                                                                                                                                                                                                                                                                                                                                                                                                                                                                                                                                                                                                                                                                                                                                                                                                                                                                                                                                                                                                                                                                                                                                                                                                                                                                                                                                                                                                                                                                                                                                                                                                                                                                                                                                                                                                                                                                                                                                 | Platform BIS UZA/UAntwerpen, University Hospital Antwerp, Edegem, Belgium                                                | UAntwerp, Laboratory of Medical Microbiology, Campus Drie Eiken S6.26, Universiteitsplein 1, 2610, Wilrijk, Antwerp, Belgium | Basil Britto Xavier, Jasmine Coppens, Christine Lammens, Veerle Matheeußen, Herman Goossens                                                                                                                                                                                                                                                                                                                                                                          |                                                                                                                                                                                                                                                        |
| EPI_ISL_888823, EPI_ISL_888825                                                                                                                                                                                                                                                                                                                                                                                                                                                                                                                                                                                                                                                                                                                                                                                                                                                                                                                                                                                                                                                                                                                                                                                                                                                                                                                                                                                                                                                                                                                                                                                                                                                                                                                                                                                                                                                                                                                                                                                                                                                                                                                                                                                                                                                                                                                                                                                                                                                                                                                                                                                                                                 | GZA Sint-Augustinus Hospital                                                                                             | UAntwerp, Laboratory of Medical Microbiology, Campus Drie Eiken S6.26, Universiteitsplein 1, 2610, Wilrijk, Antwerp, Belgium | Basil Britto Xavier, Jasmine Coppens, Christine Lammens, Veerle Matheeußen, Herman Goossens                                                                                                                                                                                                                                                                                                                                                                          |                                                                                                                                                                                                                                                        |
| EPI_ISL_888920, EPI_ISL_888921, EPI_ISL_888923, EPI_ISL_888924, EPI_ISL_888931, EPI_ISL_888933                                                                                                                                                                                                                                                                                                                                                                                                                                                                                                                                                                                                                                                                                                                                                                                                                                                                                                                                                                                                                                                                                                                                                                                                                                                                                                                                                                                                                                                                                                                                                                                                                                                                                                                                                                                                                                                                                                                                                                                                                                                                                                                                                                                                                                                                                                                                                                                                                                                                                                                                                                 | Wyoming Public Health Laboratory                                                                                         | Wyoming Public Health Laboratory                                                                                             | Noah Hull, Taylor Fearing, Lynette Gumbleton, Channing Weber, Ashley Norberg, Bailey Bowcutt, and Wanda Manley                                                                                                                                                                                                                                                                                                                                                       |                                                                                                                                                                                                                                                        |
| EPI_ISL_888997                                                                                                                                                                                                                                                                                                                                                                                                                                                                                                                                                                                                                                                                                                                                                                                                                                                                                                                                                                                                                                                                                                                                                                                                                                                                                                                                                                                                                                                                                                                                                                                                                                                                                                                                                                                                                                                                                                                                                                                                                                                                                                                                                                                                                                                                                                                                                                                                                                                                                                                                                                                                                                                 | RSU Asysyifaa                                                                                                            | Eijkman Institute for Molecular Biology, Ministry of Research and Technology/National Agency for Research and Innovation     | Sukma Oktavianthi, Willy Agustine, Edison Johar, Hidayat Trimarsanto, Iskandar Adnan, Lydia V. Panggalo, Frilasita A Yudhaputri, Safarina G Malik, Khin Saw Myint, Amin Soebandrio                                                                                                                                                                                                                                                                                   |                                                                                                                                                                                                                                                        |
| EPI_ISL_888998                                                                                                                                                                                                                                                                                                                                                                                                                                                                                                                                                                                                                                                                                                                                                                                                                                                                                                                                                                                                                                                                                                                                                                                                                                                                                                                                                                                                                                                                                                                                                                                                                                                                                                                                                                                                                                                                                                                                                                                                                                                                                                                                                                                                                                                                                                                                                                                                                                                                                                                                                                                                                                                 | RSUD Cileungsi                                                                                                           | Eijkman Institute for Molecular Biology, Ministry of Research and Technology/National Agency for Research and Innovation     | Sukma Oktavianthi, Willy Agustine, Edison Johar, Hidayat Trimarsanto, Iskandar Adnan, Lydia V. Panggalo, Frilasita A Yudhaputri, Safarina G Malik, Khin Saw Myint, Amin Soebandrio                                                                                                                                                                                                                                                                                   |                                                                                                                                                                                                                                                        |
| EPI_ISL_888999                                                                                                                                                                                                                                                                                                                                                                                                                                                                                                                                                                                                                                                                                                                                                                                                                                                                                                                                                                                                                                                                                                                                                                                                                                                                                                                                                                                                                                                                                                                                                                                                                                                                                                                                                                                                                                                                                                                                                                                                                                                                                                                                                                                                                                                                                                                                                                                                                                                                                                                                                                                                                                                 | RS Mitra Keluarga Cibubur                                                                                                | Eijkman Institute for Molecular Biology, Ministry of Research and Technology/National Agency for Research and Innovation     | Sukma Oktavianthi, Willy Agustine, Edison Johar, Hidayat Trimarsanto, Iskandar Adnan, Lydia V. Panggalo, Frilasita A Yudhaputri, Safarina G Malik, Khin Saw Myint, Amin Soebandrio                                                                                                                                                                                                                                                                                   |                                                                                                                                                                                                                                                        |
| EPI_ISL_889004                                                                                                                                                                                                                                                                                                                                                                                                                                                                                                                                                                                                                                                                                                                                                                                                                                                                                                                                                                                                                                                                                                                                                                                                                                                                                                                                                                                                                                                                                                                                                                                                                                                                                                                                                                                                                                                                                                                                                                                                                                                                                                                                                                                                                                                                                                                                                                                                                                                                                                                                                                                                                                                 | RS Mitra Keluarga Gading Serpong                                                                                         | Eijkman Institute for Molecular Biology, Ministry of Research and Technology/National Agency for Research and Innovation     | Willy Agustine, Edison Johar, Hidayat Trimarsanto, Iskandar Adnan, Lydia V. Panggalo, Sukma Oktavianthi, Frilasita A Yudhaputri, Safarina G Malik, Khin Saw Myint, Amin Soebandrio                                                                                                                                                                                                                                                                                   |                                                                                                                                                                                                                                                        |
| EPI_ISL_889005                                                                                                                                                                                                                                                                                                                                                                                                                                                                                                                                                                                                                                                                                                                                                                                                                                                                                                                                                                                                                                                                                                                                                                                                                                                                                                                                                                                                                                                                                                                                                                                                                                                                                                                                                                                                                                                                                                                                                                                                                                                                                                                                                                                                                                                                                                                                                                                                                                                                                                                                                                                                                                                 | Eijkman Institute for Molecular Biology, Ministry of Research and Technology/National Agency for Research and Innovation | Eijkman Institute for Molecular Biology, Ministry of Research and Technology/National Agency for Research and Innovation     | Willy Agustine, Edison Johar, Hidayat Trimarsanto, Iskandar Adnan, Lydia V. Panggalo, Sukma Oktavianthi, Frilasita A Yudhaputri, Safarina G Malik, Khin Saw Myint, Amin Soebandrio                                                                                                                                                                                                                                                                                   |                                                                                                                                                                                                                                                        |
| EPI_ISL_889006                                                                                                                                                                                                                                                                                                                                                                                                                                                                                                                                                                                                                                                                                                                                                                                                                                                                                                                                                                                                                                                                                                                                                                                                                                                                                                                                                                                                                                                                                                                                                                                                                                                                                                                                                                                                                                                                                                                                                                                                                                                                                                                                                                                                                                                                                                                                                                                                                                                                                                                                                                                                                                                 | RSU Harapan Bunda                                                                                                        | Eijkman Institute for Molecular Biology, Ministry of Research and Technology/National Agency for Research and Innovation     | Willy Agustine, Edison Johar, Hidayat Trimarsanto, Iskandar Adnan, Lydia V. Panggalo, Sukma Oktavianthi, Frilasita A Yudhaputri, Safarina G Malik, Khin Saw Myint, Amin Soebandrio                                                                                                                                                                                                                                                                                   |                                                                                                                                                                                                                                                        |
| EPI_ISL_889007                                                                                                                                                                                                                                                                                                                                                                                                                                                                                                                                                                                                                                                                                                                                                                                                                                                                                                                                                                                                                                                                                                                                                                                                                                                                                                                                                                                                                                                                                                                                                                                                                                                                                                                                                                                                                                                                                                                                                                                                                                                                                                                                                                                                                                                                                                                                                                                                                                                                                                                                                                                                                                                 | RSUD Cileungsi                                                                                                           | Eijkman Institute for Molecular Biology, Ministry of Research and Technology/National Agency for Research and Innovation     | Willy Agustine, Edison Johar, Hidayat Trimarsanto, Iskandar Adnan, Lydia V. Panggalo, Sukma Oktavianthi, Frilasita A Yudhaputri, Safarina G Malik, Khin Saw Myint, Amin Soebandrio                                                                                                                                                                                                                                                                                   |                                                                                                                                                                                                                                                        |
| EPI_ISL_889018                                                                                                                                                                                                                                                                                                                                                                                                                                                                                                                                                                                                                                                                                                                                                                                                                                                                                                                                                                                                                                                                                                                                                                                                                                                                                                                                                                                                                                                                                                                                                                                                                                                                                                                                                                                                                                                                                                                                                                                                                                                                                                                                                                                                                                                                                                                                                                                                                                                                                                                                                                                                                                                 | RSU Medika Dramaga                                                                                                       | Eijkman Institute for Molecular Biology, Ministry of Research and Technology/National Agency for Research and Innovation     | Lydia V. Panggalo, Sukma Oktavianthi, Willy Agustine, Edison Johar, Hidayat Trimarsanto, Iskandar Adnan, Frilasita A Yudhaputri, Safarina G Malik, Khin Saw Myint, Amin Soebandrio                                                                                                                                                                                                                                                                                   |                                                                                                                                                                                                                                                        |
| EPI_ISL_889019                                                                                                                                                                                                                                                                                                                                                                                                                                                                                                                                                                                                                                                                                                                                                                                                                                                                                                                                                                                                                                                                                                                                                                                                                                                                                                                                                                                                                                                                                                                                                                                                                                                                                                                                                                                                                                                                                                                                                                                                                                                                                                                                                                                                                                                                                                                                                                                                                                                                                                                                                                                                                                                 | RSIA Sayyidah                                                                                                            | Eijkman Institute for Molecular Biology, Ministry of Research and Technology/National Agency for Research and Innovation     | Lydia V. Panggalo, Sukma Oktavianthi, Willy Agustine, Edison Johar, Hidayat Trimarsanto, Iskandar Adnan, Frilasita A Yudhaputri, Safarina G Malik, Khin Saw Myint, Amin Soebandrio                                                                                                                                                                                                                                                                                   |                                                                                                                                                                                                                                                        |
| EPI_ISL_889552, EPI_ISL_889553, EPI_ISL_889554, EPI_ISL_889555, EPI_ISL_889556, EPI_ISL_889557, EPI_ISL_889558, EPI_ISL_889559, EPI_ISL_889560, EPI_ISL_889561, EPI_ISL_889562, EPI_ISL_889563, EPI_ISL_889564, EPI_ISL_889565, EPI_ISL_889566, EPI_ISL_889567, EPI_ISL_889568, EPI_ISL_889569, EPI_ISL_889570, EPI_ISL_889571, EPI_ISL_889572, EPI_ISL_889573, EPI_ISL_889574, EPI_ISL_889575, EPI_ISL_889576, EPI_ISL_889577, EPI_ISL_889578, EPI_ISL_889579, EPI_ISL_889580, EPI_ISL_889581, EPI_ISL_889582, EPI_ISL_889583, EPI_ISL_889584, EPI_ISL_889585, EPI_ISL_889586, EPI_ISL_889587, EPI_ISL_889588, EPI_ISL_889589, EPI_ISL_889590, EPI_ISL_889591, EPI_ISL_889592, EPI_ISL_889593, EPI_ISL_889594, EPI_ISL_889595, EPI_ISL_889596, EPI_ISL_889597, EPI_ISL_889598, EPI_ISL_889599, EPI_ISL_889600, EPI_ISL_889601, EPI_ISL_889602, EPI_ISL_889603, EPI_ISL_889604, EPI_ISL_889605, EPI_ISL_889606, EPI_ISL_889607, EPI_ISL_889608, EPI_ISL_889609, EPI_ISL_889610, EPI_ISL_889611, EPI_ISL_889612, EPI_ISL_889613, EPI_ISL_889614, EPI_ISL_889615, EPI_ISL_889616, EPI_ISL_889617, EPI_ISL_889618, EPI_ISL_889619, EPI_ISL_889620, EPI_ISL_889621, EPI_ISL_889622, EPI_ISL_889623, EPI_ISL_889624, EPI_ISL_889625, EPI_ISL_889626, EPI_ISL_889686, EPI_ISL_889687, EPI_ISL_889688, EPI_ISL_889689, EPI_ISL_889690, EPI_ISL_889691, EPI_ISL_889692, EPI_ISL_889693, EPI_ISL_889694, EPI_ISL_889695, EPI_ISL_889696, EPI_ISL_889697, EPI_ISL_889698, EPI_ISL_889699, EPI_ISL_889700, EPI_ISL_889701, EPI_ISL_889703, EPI_ISL_889704, EPI_ISL_889705, EPI_ISL_889706, EPI_ISL_889707, EPI_ISL_889708, EPI_ISL_889709, EPI_ISL_889710, EPI_ISL_889711, EPI_ISL_889712, EPI_ISL_889713, EPI_ISL_889714, EPI_ISL_889715, EPI_ISL_889716, EPI_ISL_889717, EPI_ISL_889718, EPI_ISL_889720, EPI_ISL_889721, EPI_ISL_889722, EPI_ISL_889723, EPI_ISL_889724, EPI_ISL_889725, EPI_ISL_889726, EPI_ISL_889727, EPI_ISL_889728, EPI_ISL_889729, EPI_ISL_889730, EPI_ISL_889731, EPI_ISL_889732, EPI_ISL_889733, EPI_ISL_889734, EPI_ISL_889735, EPI_ISL_889736, EPI_ISL_889737, EPI_ISL_889738, EPI_ISL_889739, EPI_ISL_889740, EPI_ISL_889741, EPI_ISL_889742, EPI_ISL_889743, EPI_ISL_889744, EPI_ISL_889745, EPI_ISL_889746, EPI_ISL_889747, EPI_ISL_889748, EPI_ISL_889749, EPI_ISL_889750, EPI_ISL_889751, EPI_ISL_889752, EPI_ISL_889753, EPI_ISL_889754, EPI_ISL_889755, EPI_ISL_889756, EPI_ISL_889757, EPI_ISL_889758, EPI_ISL_889759, EPI_ISL_889760, EPI_ISL_889761, EPI_ISL_889762, EPI_ISL_889763, EPI_ISL_889764, EPI_ISL_889765, EPI_ISL_889766, EPI_ISL_889767, EPI_ISL_889768, EPI_ISL_889769, EPI_ISL_889770, EPI_ISL_889771, EPI_ISL_889772 | see above                                                                                                                | LSUHS Emerging Viral Threat Laboratory                                                                                       | Microbial Genome Sequencing Center                                                                                                                                                                                                                                                                                                                                                                                                                                   | Jeremy P. Kamil, Jennifer L. Carroll, Camille F. Abshire, Maarten Van Diest, Mohammed N.A. Siddiquey, Andrew D. Yurochko, Martin J. Sapp, Rona S. Scott, Christopher G. Kevill, Daniel J. Snyder, Vaughn S. Cooper, John A. Vanchiere, Jeremy P. Kamil |
| EPI_ISL_889773, EPI_ISL_889774, EPI_ISL_889775                                                                                                                                                                                                                                                                                                                                                                                                                                                                                                                                                                                                                                                                                                                                                                                                                                                                                                                                                                                                                                                                                                                                                                                                                                                                                                                                                                                                                                                                                                                                                                                                                                                                                                                                                                                                                                                                                                                                                                                                                                                                                                                                                                                                                                                                                                                                                                                                                                                                                                                                                                                                                 | LSUHS Emerging Viral Threat Laboratory                                                                                   | Microbial Genome Sequencing Center                                                                                           | Mohammed N.A. Siddiquey, Jennifer L. Carroll, Camille F. Abshire, Maarten Van Diest, Andrew D. Yurochko, Martin J. Sapp, Rona S. Scott, Christopher G. Kevill, Daniel J. Snyder, Vaughn S. Cooper, John A. Vanchiere, Jeremy P. Kamil                                                                                                                                                                                                                                |                                                                                                                                                                                                                                                        |
| EPI_ISL_889776, EPI_ISL_889777, EPI_ISL_889778, EPI_ISL_889779, EPI_ISL_889780, EPI_ISL_889781, EPI_ISL_889782, EPI_ISL_889783, EPI_ISL_889784, EPI_ISL_889785                                                                                                                                                                                                                                                                                                                                                                                                                                                                                                                                                                                                                                                                                                                                                                                                                                                                                                                                                                                                                                                                                                                                                                                                                                                                                                                                                                                                                                                                                                                                                                                                                                                                                                                                                                                                                                                                                                                                                                                                                                                                                                                                                                                                                                                                                                                                                                                                                                                                                                 | LSUHS Emerging Viral Threat Laboratory                                                                                   | Microbial Genome Sequencing Center                                                                                           | Maarten Van Diest, Jennifer L. Carroll, Camille F. Abshire, Mohammed N.A. Siddiquey, Andrew D. Yurochko, Martin J. Sapp, Rona S. Scott, Christopher G. Kevill, Daniel J. Snyder, Vaughn S. Cooper, John A. Vanchiere, Jeremy P. Kamil                                                                                                                                                                                                                                |                                                                                                                                                                                                                                                        |
| EPI_ISL_889786, EPI_ISL_889787, EPI_ISL_889788, EPI_ISL_889789, EPI_ISL_889790, EPI_ISL_889791                                                                                                                                                                                                                                                                                                                                                                                                                                                                                                                                                                                                                                                                                                                                                                                                                                                                                                                                                                                                                                                                                                                                                                                                                                                                                                                                                                                                                                                                                                                                                                                                                                                                                                                                                                                                                                                                                                                                                                                                                                                                                                                                                                                                                                                                                                                                                                                                                                                                                                                                                                 | LSUHS Emerging Viral Threat Laboratory                                                                                   | Microbial Genome Sequencing Center                                                                                           | Jennifer L. Carroll, Rona S. Scott, Camille F. Abshire, Maarten Van Diest, Mohammed N.A. Siddiquey, Andrew D. Yurochko, Martin J. Sapp, Christopher G. Kevill, Daniel J. Snyder, Vaughn S. Cooper, John A. Vanchiere, Jeremy P. Kamil                                                                                                                                                                                                                                |                                                                                                                                                                                                                                                        |
| EPI_ISL_889792, EPI_ISL_889793, EPI_ISL_889794, EPI_ISL_889795, EPI_ISL_889796, EPI_ISL_889797, EPI_ISL_889798, EPI_ISL_889799, EPI_ISL_889800, EPI_ISL_889801                                                                                                                                                                                                                                                                                                                                                                                                                                                                                                                                                                                                                                                                                                                                                                                                                                                                                                                                                                                                                                                                                                                                                                                                                                                                                                                                                                                                                                                                                                                                                                                                                                                                                                                                                                                                                                                                                                                                                                                                                                                                                                                                                                                                                                                                                                                                                                                                                                                                                                 | LSUHS Emerging Viral Threat Laboratory                                                                                   | Microbial Genome Sequencing Center                                                                                           | Rona S. Scott, Jennifer L. Carroll, Camille F. Abshire, Maarten Van Diest, Mohammed N.A. Siddiquey, Andrew D. Yurochko, Martin J. Sapp, Christopher G. Kevill, Daniel J. Snyder, Vaughn S. Cooper, John A. Vanchiere, Jeremy P. Kamil                                                                                                                                                                                                                                |                                                                                                                                                                                                                                                        |
| EPI_ISL_890280, EPI_ISL_890282, EPI_ISL_890283, EPI_ISL_890286, EPI_ISL_890287, EPI_ISL_890296, EPI_ISL_890298, EPI_ISL_890299, EPI_ISL_890300, EPI_ISL_890304, EPI_ISL_890305, EPI_ISL_890308, EPI_ISL_890313, EPI_ISL_890319, EPI_ISL_890320, EPI_ISL_890322, EPI_ISL_890333, EPI_ISL_890341                                                                                                                                                                                                                                                                                                                                                                                                                                                                                                                                                                                                                                                                                                                                                                                                                                                                                                                                                                                                                                                                                                                                                                                                                                                                                                                                                                                                                                                                                                                                                                                                                                                                                                                                                                                                                                                                                                                                                                                                                                                                                                                                                                                                                                                                                                                                                                 | see above                                                                                                                | KU Leuven, Rega Institute, Clinical and Epidemiological Virology                                                             | Tony Wawina-Bokalanga, Bert Vanmechelen, Joan Marti-Carerras, Piet Maes                                                                                                                                                                                                                                                                                                                                                                                              |                                                                                                                                                                                                                                                        |
| EPI_ISL_890352                                                                                                                                                                                                                                                                                                                                                                                                                                                                                                                                                                                                                                                                                                                                                                                                                                                                                                                                                                                                                                                                                                                                                                                                                                                                                                                                                                                                                                                                                                                                                                                                                                                                                                                                                                                                                                                                                                                                                                                                                                                                                                                                                                                                                                                                                                                                                                                                                                                                                                                                                                                                                                                 | Labo Analyses Med                                                                                                        | National Reference Center for Viruses of Respiratory Infections, Institut Pasteur, Paris                                     | Marion Barbet, Sylvie Behillil, Méline Bizard, Angela Brisebarre, Camille Capel, Etienne Simon-Lorière, Vincent Enouf, Maud Vanpeene, Sylvie van der Werf,Rousset Dominique                                                                                                                                                                                                                                                                                          |                                                                                                                                                                                                                                                        |
| EPI_ISL_890358                                                                                                                                                                                                                                                                                                                                                                                                                                                                                                                                                                                                                                                                                                                                                                                                                                                                                                                                                                                                                                                                                                                                                                                                                                                                                                                                                                                                                                                                                                                                                                                                                                                                                                                                                                                                                                                                                                                                                                                                                                                                                                                                                                                                                                                                                                                                                                                                                                                                                                                                                                                                                                                 | Hospital                                                                                                                 | National Reference Center for Viruses of Respiratory Infections, Institut Pasteur, Paris                                     | Marion Barbet, Sylvie Behillil, Méline Bizard, Angela Brisebarre, Camille Capel, Etienne Simon-Lorière, Vincent Enouf, Maud Vanpeene, Sylvie van der Werf,Combe Patrice                                                                                                                                                                                                                                                                                              |                                                                                                                                                                                                                                                        |
| EPI_ISL_890363, EPI_ISL_890366                                                                                                                                                                                                                                                                                                                                                                                                                                                                                                                                                                                                                                                                                                                                                                                                                                                                                                                                                                                                                                                                                                                                                                                                                                                                                                                                                                                                                                                                                                                                                                                                                                                                                                                                                                                                                                                                                                                                                                                                                                                                                                                                                                                                                                                                                                                                                                                                                                                                                                                                                                                                                                 | LSUHS Emerging Viral Threat Laboratory                                                                                   | Microbial Genome Sequencing Center                                                                                           | Jeremy P. Kamil, Jennifer L. Carroll, Camille F. Abshire, Maarten Van Diest, Mohammed N.A. Siddiquey, Andrew D. Yurochko, Martin J. Sapp, Rona S. Scott, Christopher G. Kevill, Daniel J. Snyder, Vaughn S. Cooper, John A. Vanchiere                                                                                                                                                                                                                                |                                                                                                                                                                                                                                                        |
| EPI_ISL_890981                                                                                                                                                                                                                                                                                                                                                                                                                                                                                                                                                                                                                                                                                                                                                                                                                                                                                                                                                                                                                                                                                                                                                                                                                                                                                                                                                                                                                                                                                                                                                                                                                                                                                                                                                                                                                                                                                                                                                                                                                                                                                                                                                                                                                                                                                                                                                                                                                                                                                                                                                                                                                                                 | Seattle Flu Study                                                                                                        | Seattle Flu Study                                                                                                            | Deborah A. Nickerson, Chris D. Frazar, Jover Lee, Benjamin Pelle, Erica Ryke, Matthew Richardson, Amanda Adler, Elisabeth Brandstetter, Peter D. Han, Kairsten Fay, Misja Ilcisin, Kirsten Lacombe, Thomas R. Sibley, Melissa Truong, Caitlin R. Wolf, Karen Cowgill, Stephanie Schrag, Jeff Duchin, Michael Boeckh, Janet A. Englund, Michael Famulare, Barry R. Lutz, Mark J. Rieder, Lea M. Starita, Matthew Thompson, Helen Y. Chu, Trevor Bedford, Jay Shendure |                                                                                                                                                                                                                                                        |
| EPI_ISL_890985, EPI_ISL_891063                                                                                                                                                                                                                                                                                                                                                                                                                                                                                                                                                                                                                                                                                                                                                                                                                                                                                                                                                                                                                                                                                                                                                                                                                                                                                                                                                                                                                                                                                                                                                                                                                                                                                                                                                                                                                                                                                                                                                                                                                                                                                                                                                                                                                                                                                                                                                                                                                                                                                                                                                                                                                                 | Seattle Flu Study                                                                                                        | Seattle Flu Study                                                                                                            | Deborah A. Nickerson, Chris D. Frazar, Jover Lee, Benjamin Pelle, Erica Ryke, Matthew Richardson, Amanda Adler, Elisabeth Brandstetter, Peter D. Han, Kairsten Fay, Misja Ilcisin, Kirsten Lacombe, Thomas R. Sibley, Melissa Truong, Caitlin R. Wolf, Michael Boeckh, Janet A. Englund, Michael Famulare, Barry R. Lutz, Mark J. Rieder, Lea M. Starita, Matthew Thompson, Jay Shendure, Trevor Bedford, Helen Y. Chu                                               |                                                                                                                                                                                                                                                        |
| EPI_ISL_891138                                                                                                                                                                                                                                                                                                                                                                                                                                                                                                                                                                                                                                                                                                                                                                                                                                                                                                                                                                                                                                                                                                                                                                                                                                                                                                                                                                                                                                                                                                                                                                                                                                                                                                                                                                                                                                                                                                                                                                                                                                                                                                                                                                                                                                                                                                                                                                                                                                                                                                                                                                                                                                                 | The Jackson Laboratory                                                                                                   | The Jackson Laboratory                                                                                                       | Lloyd M, Sanderson B, Srivastava A, Maurya R, Renzette N, Omerza G, Kelly K, Li L, Wei C L, Adams M                                                                                                                                                                                                                                                                                                                                                                  |                                                                                                                                                                                                                                                        |
| EPI_ISL_891250                                                                                                                                                                                                                                                                                                                                                                                                                                                                                                                                                                                                                                                                                                                                                                                                                                                                                                                                                                                                                                                                                                                                                                                                                                                                                                                                                                                                                                                                                                                                                                                                                                                                                                                                                                                                                                                                                                                                                                                                                                                                                                                                                                                                                                                                                                                                                                                                                                                                                                                                                                                                                                                 | AZ Delta                                                                                                                 | AZ Delta                                                                                                                     | Geert Martens, Dieter De Smet, Brigitte Maes                                                                                                                                                                                                                                                                                                                                                                                                                         |                                                                                                                                                                                                                                                        |
| EPI_ISL_891275                                                                                                                                                                                                                                                                                                                                                                                                                                                                                                                                                                                                                                                                                                                                                                                                                                                                                                                                                                                                                                                                                                                                                                                                                                                                                                                                                                                                                                                                                                                                                                                                                                                                                                                                                                                                                                                                                                                                                                                                                                                                                                                                                                                                                                                                                                                                                                                                                                                                                                                                                                                                                                                 | Lighthouse Lab in Cambridge                                                                                              | Wellcome Sanger Institute for the COVID-19 Genomics UK (COG-UK) Consortium                                                   | Rob Howes, The Lighthouse Lab in Cambridge and Alex Alderton, Roberto Amato, Sonia Goncalves, Ewan Harrison, David K. Jackson, Ian Johnston, Dominic Kwiatkowski, Cordelia Langford, John Sillitoe on behalf of the Wellcome Sanger Institute COVID-19 Surveillance Team                                                                                                                                                                                             |                                                                                                                                                                                                                                                        |

[illegible]

[illegible]

[illegible]

[illegible]

[illegible]



[illegible]

|                                                                                                                                                                                                                                                                                                                                                                                                                                                                                                                                                                                                                                                                                                                | Virology                                                         | Virology                                                                                 |                                                                                                                                                                                          |
|----------------------------------------------------------------------------------------------------------------------------------------------------------------------------------------------------------------------------------------------------------------------------------------------------------------------------------------------------------------------------------------------------------------------------------------------------------------------------------------------------------------------------------------------------------------------------------------------------------------------------------------------------------------------------------------------------------------|------------------------------------------------------------------|------------------------------------------------------------------------------------------|------------------------------------------------------------------------------------------------------------------------------------------------------------------------------------------|
| EPI_ISL_894220, EPI_ISL_894221, EPI_ISL_894224, EPI_ISL_894226, EPI_ISL_894229, EPI_ISL_894230, EPI_ISL_894231                                                                                                                                                                                                                                                                                                                                                                                                                                                                                                                                                                                                 | CH de Mayotte - Laboratoire de Biologie                          | National Reference Center for Viruses of Respiratory Infections, Institut Pasteur, Paris | Marion Barbet, Sylvie Behillil, Méline Bizard, Angela Brisebarre, Camille Capel, Etienne Simon-Lorière, Vincent Enouf, Maud Vanpeene, Sylvie van der Werf, Combe Patrice                 |
| EPI_ISL_894249, EPI_ISL_894259, EPI_ISL_894261, EPI_ISL_894265, EPI_ISL_894266, EPI_ISL_894270, EPI_ISL_894271, EPI_ISL_894273                                                                                                                                                                                                                                                                                                                                                                                                                                                                                                                                                                                 | Ministry of Health Turkey                                        | Ministry of Health Turkey                                                                | Fatma Bayrakdar, Yasemin Cogun, Süleyman Yalcin, Aye Baak Alta, Gülay Korukluolu                                                                                                         |
| EPI_ISL_896073                                                                                                                                                                                                                                                                                                                                                                                                                                                                                                                                                                                                                                                                                                 | Labormedizinisches Zentrum Dr Risch                              | University Hospital Basel, Clinical Bacteriology                                         | Tim Roloff, Madlen Stange, Helena MB Seth-Smith, Alfredo Mari, Karoline Leuzinger, Julia Bielicki, Nadia Wohlwend, Martin Risch, Lorenz Risch, Manuel Battegay, Hans Hirsch, Adrian Egli |
| EPI_ISL_896074, EPI_ISL_896075, EPI_ISL_896076                                                                                                                                                                                                                                                                                                                                                                                                                                                                                                                                                                                                                                                                 | Viollier AG                                                      | University Hospital Basel, Clinical Bacteriology                                         | Tim Roloff, Madlen Stange, Helena MB Seth-Smith, Alfredo Mari, Karoline Leuzinger, Julia Bielicki, Christiane Beckmann, Manuel Battegay, Hans Hirsch, Adrian Egli                        |
| EPI_ISL_896077                                                                                                                                                                                                                                                                                                                                                                                                                                                                                                                                                                                                                                                                                                 | Labormedizinisches Zentrum Dr Risch                              | University Hospital Basel, Clinical Bacteriology                                         | Tim Roloff, Madlen Stange, Helena MB Seth-Smith, Alfredo Mari, Karoline Leuzinger, Julia Bielicki, Nadia Wohlwend, Martin Risch, Lorenz Risch, Manuel Battegay, Hans Hirsch, Adrian Egli |
| EPI_ISL_896078                                                                                                                                                                                                                                                                                                                                                                                                                                                                                                                                                                                                                                                                                                 | Viollier AG                                                      | University Hospital Basel, Clinical Bacteriology                                         | Tim Roloff, Madlen Stange, Helena MB Seth-Smith, Alfredo Mari, Karoline Leuzinger, Julia Bielicki, Christiane Beckmann, Manuel Battegay, Hans Hirsch, Adrian Egli                        |
| EPI_ISL_896079, EPI_ISL_896080, EPI_ISL_896081, EPI_ISL_896082, EPI_ISL_896083                                                                                                                                                                                                                                                                                                                                                                                                                                                                                                                                                                                                                                 | Labormedizinisches Zentrum Dr Risch                              | University Hospital Basel, Clinical Bacteriology                                         | Tim Roloff, Madlen Stange, Helena MB Seth-Smith, Alfredo Mari, Karoline Leuzinger, Julia Bielicki, Nadia Wohlwend, Martin Risch, Lorenz Risch, Manuel Battegay, Hans Hirsch, Adrian Egli |
| EPI_ISL_896086                                                                                                                                                                                                                                                                                                                                                                                                                                                                                                                                                                                                                                                                                                 | Viollier AG                                                      | University Hospital Basel, Clinical Bacteriology                                         | Tim Roloff, Madlen Stange, Helena MB Seth-Smith, Alfredo Mari, Karoline Leuzinger, Julia Bielicki, Christiane Beckmann, Manuel Battegay, Hans Hirsch, Adrian Egli                        |
| EPI_ISL_896096, EPI_ISL_896097                                                                                                                                                                                                                                                                                                                                                                                                                                                                                                                                                                                                                                                                                 | Labormedizinisches Zentrum Dr Risch                              | University Hospital Basel, Clinical Bacteriology                                         | Tim Roloff, Madlen Stange, Helena MB Seth-Smith, Alfredo Mari, Karoline Leuzinger, Julia Bielicki, Nadia Wohlwend, Martin Risch, Lorenz Risch, Manuel Battegay, Hans Hirsch, Adrian Egli |
| EPI_ISL_896098                                                                                                                                                                                                                                                                                                                                                                                                                                                                                                                                                                                                                                                                                                 | Rothen Medizinische Laboratorien AG                              | University Hospital Basel, Clinical Bacteriology                                         | Tim Roloff, Madlen Stange, Helena MB Seth-Smith, Alfredo Mari, Karoline Leuzinger, Julia Bielicki, Ingrid Steffen, Manuel Battegay, Hans Hirsch, Adrian Egli                             |
| EPI_ISL_896100                                                                                                                                                                                                                                                                                                                                                                                                                                                                                                                                                                                                                                                                                                 | Viollier AG                                                      | University Hospital Basel, Clinical Bacteriology                                         | Tim Roloff, Madlen Stange, Helena MB Seth-Smith, Alfredo Mari, Karoline Leuzinger, Julia Bielicki, Christiane Beckmann, Manuel Battegay, Hans Hirsch, Adrian Egli                        |
| EPI_ISL_896106, EPI_ISL_896108, EPI_ISL_896115                                                                                                                                                                                                                                                                                                                                                                                                                                                                                                                                                                                                                                                                 | Labormedizinisches Zentrum Dr Risch                              | University Hospital Basel, Clinical Bacteriology                                         | Tim Roloff, Madlen Stange, Helena MB Seth-Smith, Alfredo Mari, Karoline Leuzinger, Julia Bielicki, Nadia Wohlwend, Martin Risch, Lorenz Risch, Manuel Battegay, Hans Hirsch, Adrian Egli |
| EPI_ISL_896167, EPI_ISL_896169, EPI_ISL_896209, EPI_ISL_896210, EPI_ISL_896211, EPI_ISL_896213, EPI_ISL_896214, EPI_ISL_896215                                                                                                                                                                                                                                                                                                                                                                                                                                                                                                                                                                                 | MEPHI, Aix Marseille University                                  | MEPHI, Aix Marseille University                                                          | Anthony LEVASSEUR                                                                                                                                                                        |
| EPI_ISL_896220, EPI_ISL_896221, EPI_ISL_896222, EPI_ISL_896223, EPI_ISL_896224, EPI_ISL_896225                                                                                                                                                                                                                                                                                                                                                                                                                                                                                                                                                                                                                 | SUNY UPSTATE MEDICAL UNIVERSITY                                  | Wadsworth Center, New York State Department of Health                                    | Kirsten St. George, Daryl M. Lamson, Alexis Russel, Matthew Shudt, Melissa A Leisner, Jonathan Plitnick, Navjot Singh, John Kelly, Erasmus Schneider, Erica Lasek-Nesselquist            |
| EPI_ISL_896232, EPI_ISL_896233                                                                                                                                                                                                                                                                                                                                                                                                                                                                                                                                                                                                                                                                                 | Columbia University Irving Medical Center                        | Wadsworth Center, New York State Department of Health                                    | Kirsten St. George, Daryl M. Lamson, Alexis Russel, Matthew Shudt, Melissa A Leisner, Jonathan Plitnick, Navjot Singh, John Kelly, Erasmus Schneider, Erica Lasek-Nesselquist            |
| EPI_ISL_896235                                                                                                                                                                                                                                                                                                                                                                                                                                                                                                                                                                                                                                                                                                 | SUNY UPSTATE MEDICAL UNIVERSITY                                  | Wadsworth Center, New York State Department of Health                                    | Kirsten St. George, Daryl M. Lamson, Alexis Russel, Matthew Shudt, Melissa A Leisner, Jonathan Plitnick, Navjot Singh, John Kelly, Erasmus Schneider, Erica Lasek-Nesselquist            |
| EPI_ISL_896236, EPI_ISL_896243                                                                                                                                                                                                                                                                                                                                                                                                                                                                                                                                                                                                                                                                                 | Columbia University Irving Medical Center                        | Wadsworth Center, New York State Department of Health                                    | Kirsten St. George, Daryl M. Lamson, Alexis Russel, Matthew Shudt, Melissa A Leisner, Jonathan Plitnick, Navjot Singh, John Kelly, Erasmus Schneider, Erica Lasek-Nesselquist            |
| EPI_ISL_896248, EPI_ISL_896250, EPI_ISL_896251, EPI_ISL_896252, EPI_ISL_896253, EPI_ISL_896254, EPI_ISL_896255, EPI_ISL_896256, EPI_ISL_896257, EPI_ISL_896260, EPI_ISL_896261, EPI_ISL_896262, EPI_ISL_896263, EPI_ISL_896264, EPI_ISL_896266, EPI_ISL_896267, EPI_ISL_896268, EPI_ISL_896269, EPI_ISL_896270, EPI_ISL_896271, EPI_ISL_896273, EPI_ISL_896274, EPI_ISL_896275, EPI_ISL_896276, EPI_ISL_896277, EPI_ISL_896278, EPI_ISL_896280, EPI_ISL_896281, EPI_ISL_896284, EPI_ISL_896287, EPI_ISL_896288, EPI_ISL_896289, EPI_ISL_896291                                                                                                                                                                 |                                                                  |                                                                                          |                                                                                                                                                                                          |
| see above                                                                                                                                                                                                                                                                                                                                                                                                                                                                                                                                                                                                                                                                                                      | SUNY UPSTATE MEDICAL UNIVERSITY                                  | Wadsworth Center, New York State Department of Health                                    | Kirsten St. George, Daryl M. Lamson, Alexis Russel, Matthew Shudt, Melissa A Leisner, Jonathan Plitnick, Navjot Singh, John Kelly, Erasmus Schneider, Erica Lasek-Nesselquist            |
| EPI_ISL_896303, EPI_ISL_896304, EPI_ISL_896306, EPI_ISL_896338, EPI_ISL_896339, EPI_ISL_896342, EPI_ISL_896350, EPI_ISL_896358, EPI_ISL_896359, EPI_ISL_896360, EPI_ISL_896361, EPI_ISL_896365, EPI_ISL_896366, EPI_ISL_896368, EPI_ISL_896369                                                                                                                                                                                                                                                                                                                                                                                                                                                                 |                                                                  |                                                                                          |                                                                                                                                                                                          |
| see above                                                                                                                                                                                                                                                                                                                                                                                                                                                                                                                                                                                                                                                                                                      | New York Presbyterian Hospital                                   | Wadsworth Center, New York State Department of Health                                    | Kirsten St. George, Daryl M. Lamson, Alexis Russel, Matthew Shudt, Melissa A Leisner, Jonathan Plitnick, Navjot Singh, John Kelly, Erasmus Schneider, Erica Lasek-Nesselquist            |
| EPI_ISL_896385, EPI_ISL_896398, EPI_ISL_896399, EPI_ISL_896402, EPI_ISL_896412, EPI_ISL_896420                                                                                                                                                                                                                                                                                                                                                                                                                                                                                                                                                                                                                 | URMC LABS                                                        | Wadsworth Center, New York State Department of Health                                    | Kirsten St. George, Daryl M. Lamson, Alexis Russel, Matthew Shudt, Melissa A Leisner, Jonathan Plitnick, Navjot Singh, John Kelly, Erasmus Schneider, Erica Lasek-Nesselquist            |
| EPI_ISL_896422, EPI_ISL_896423, EPI_ISL_896431                                                                                                                                                                                                                                                                                                                                                                                                                                                                                                                                                                                                                                                                 | Columbia University Irving Medical Center                        | Wadsworth Center, New York State Department of Health                                    | Kirsten St. George, Daryl M. Lamson, Alexis Russel, Matthew Shudt, Melissa A Leisner, Jonathan Plitnick, Navjot Singh, John Kelly, Erasmus Schneider, Erica Lasek-Nesselquist            |
| EPI_ISL_896447, EPI_ISL_896448, EPI_ISL_896449, EPI_ISL_896451, EPI_ISL_896452, EPI_ISL_896453, EPI_ISL_896454, EPI_ISL_896455, EPI_ISL_896456, EPI_ISL_896457, EPI_ISL_896458, EPI_ISL_896459, EPI_ISL_896460, EPI_ISL_896461, EPI_ISL_896462, EPI_ISL_896463, EPI_ISL_896464, EPI_ISL_896465, EPI_ISL_896466, EPI_ISL_896467, EPI_ISL_896468, EPI_ISL_896469, EPI_ISL_896470, EPI_ISL_896471, EPI_ISL_896473, EPI_ISL_896474, EPI_ISL_896475, EPI_ISL_896476, EPI_ISL_896477, EPI_ISL_896478, EPI_ISL_896479, EPI_ISL_896480, EPI_ISL_896481, EPI_ISL_896482, EPI_ISL_896483, EPI_ISL_896484, EPI_ISL_896485, EPI_ISL_896489, EPI_ISL_896490, EPI_ISL_896491, EPI_ISL_896492, EPI_ISL_896493, EPI_ISL_896494 |                                                                  |                                                                                          |                                                                                                                                                                                          |
| see above                                                                                                                                                                                                                                                                                                                                                                                                                                                                                                                                                                                                                                                                                                      | KU Leuven, Rega Institute, Clinical and Epidemiological Virology | KU Leuven, Rega Institute, Clinical and Epidemiological Virology                         | Tony Wawina-Bokalanga, Bert Vanmechelen, Joan Marti-Carerras, Piet Maes                                                                                                                  |
| EPI_ISL_896495, EPI_ISL_896496, EPI_ISL_896497, EPI_ISL_896502, EPI_ISL_896509, EPI_ISL_896510, EPI_ISL_896516, EPI_ISL_896517, EPI_ISL_896518, EPI_ISL_896519                                                                                                                                                                                                                                                                                                                                                                                                                                                                                                                                                 | URMC LABS                                                        | Wadsworth Center, New York State Department of Health                                    | Kirsten St. George, Daryl M. Lamson, Alexis Russel, Matthew Shudt, Melissa A Leisner, Jonathan Plitnick, Navjot Singh, John Kelly, Erasmus Schneider, Erica Lasek-Nesselquist            |
| EPI_ISL_896525, EPI_ISL_896534, EPI_ISL_896538, EPI_ISL_896551, EPI_ISL_896553, EPI_ISL_896556, EPI_ISL_896557, EPI_ISL_896558                                                                                                                                                                                                                                                                                                                                                                                                                                                                                                                                                                                 | New York Presbyterian Hospital                                   | Wadsworth Center, New York State Department of Health                                    | Kirsten St. George, Daryl M. Lamson, Alexis Russel, Matthew Shudt, Melissa A Leisner, Jonathan Plitnick, Navjot Singh, John Kelly, Erasmus Schneider, Erica Lasek-Nesselquist            |
| EPI_ISL_896566, EPI_ISL_896568                                                                                                                                                                                                                                                                                                                                                                                                                                                                                                                                                                                                                                                                                 | URMC LABS                                                        | Wadsworth Center, New York State Department of Health                                    | Kirsten St. George, Daryl M. Lamson, Alexis Russel, Matthew Shudt, Melissa A Leisner, Jonathan Plitnick, Navjot Singh, John Kelly, Erasmus Schneider, Erica Lasek-Nesselquist            |
| EPI_ISL_897613, EPI_ISL_897616, EPI_ISL_897617, EPI_ISL_897618, EPI_ISL_897620, EPI_ISL_897621, EPI_ISL_897622, EPI_ISL_897623, EPI_ISL_897625, EPI_ISL_897626, EPI_ISL_897627, EPI_ISL_897628, EPI_ISL_897629, EPI_ISL_897630, EPI_ISL_897632, EPI_ISL_897633, EPI_ISL_897634, EPI_ISL_897635, EPI_ISL_897636, EPI_ISL_897637, EPI_ISL_897638, EPI_ISL_897639, EPI_ISL_897640, EPI_ISL_897641, EPI_ISL_897642, EPI_ISL_897643, EPI_ISL_897644, EPI_ISL_897645, EPI_ISL_897646, EPI_ISL_897647, EPI_ISL_897648, EPI_ISL_897649, EPI_ISL_897650, EPI_ISL_897651, EPI_ISL_897652, EPI_ISL_897653,                                                                                                                |                                                                  |                                                                                          |                                                                                                                                                                                          |



[illegible]

|                                                                                                                                                                                                                                                                                                                                                                                                                                                                                                                                                                                                                                                |                                                                                                                |                                                                                                                            |                                                                                                                                                                                                                                                                                                                                                                                                                                                                                                 |                                                                                                                                                                                                                                                                                                                                                                        |
|------------------------------------------------------------------------------------------------------------------------------------------------------------------------------------------------------------------------------------------------------------------------------------------------------------------------------------------------------------------------------------------------------------------------------------------------------------------------------------------------------------------------------------------------------------------------------------------------------------------------------------------------|----------------------------------------------------------------------------------------------------------------|----------------------------------------------------------------------------------------------------------------------------|-------------------------------------------------------------------------------------------------------------------------------------------------------------------------------------------------------------------------------------------------------------------------------------------------------------------------------------------------------------------------------------------------------------------------------------------------------------------------------------------------|------------------------------------------------------------------------------------------------------------------------------------------------------------------------------------------------------------------------------------------------------------------------------------------------------------------------------------------------------------------------|
| see above                                                                                                                                                                                                                                                                                                                                                                                                                                                                                                                                                                                                                                      | Viollier AG                                                                                                    | Department of Biosystems Science and Engineering, ETH Zürich                                                               | Christian Beisel, Sarah Nadeau, Chaoran Chen, Ivan Topolsky, Philipp Jablonski, Lara Fuhrmann, David Dreifuss, Katharina Jahn, Tobias Schär, Ina Nissen, Natascha Santacroce, Elodie Burcklen, Christiane Beckmann, Maurice Redondo, Olivier Kobel, Christoph Noppen, Sophie Seidel, Noemie Santamaria de Souza, Niko Beerenwinkel, Tanja Stadler                                                                                                                                               |                                                                                                                                                                                                                                                                                                                                                                        |
| EPI_ISL_899802, EPI_ISL_899803, EPI_ISL_899804, EPI_ISL_899807, EPI_ISL_899808                                                                                                                                                                                                                                                                                                                                                                                                                                                                                                                                                                 | Viollier AG                                                                                                    | Department of Biosystems Science and Engineering, ETH Zürich                                                               | Chaoran Chen, Sarah Nadeau, Ivan Topolsky, Emmanouil Dermitzakis, Keith Harshman, Ioannis Xenarios, Henri Pegeot, Lorenzo Cerutti, Deborah Penet, Philipp Jablonski, Lara Fuhrmann, David Dreifuss, Katharina Jahn, Christiane Beckmann, Maurice Redondo, Olivier Kobel, Christoph Noppen, Sophie Seidel, Noemie Santamaria de Souza, Niko Beerenwinkel, Tanja Stadler                                                                                                                          |                                                                                                                                                                                                                                                                                                                                                                        |
| EPI_ISL_899838, EPI_ISL_899839, EPI_ISL_899843, EPI_ISL_899844, EPI_ISL_899845, EPI_ISL_899848, EPI_ISL_899849, EPI_ISL_899850                                                                                                                                                                                                                                                                                                                                                                                                                                                                                                                 | Viollier AG                                                                                                    | Department of Biosystems Science and Engineering, ETH Zürich                                                               | Christian Beisel, Sarah Nadeau, Chaoran Chen, Ivan Topolsky, Philipp Jablonski, Lara Fuhrmann, David Dreifuss, Katharina Jahn, Tobias Schär, Ina Nissen, Natascha Santacroce, Elodie Burcklen, Christiane Beckmann, Maurice Redondo, Olivier Kobel, Christoph Noppen, Sophie Seidel, Noemie Santamaria de Souza, Niko Beerenwinkel, Tanja Stadler                                                                                                                                               |                                                                                                                                                                                                                                                                                                                                                                        |
| EPI_ISL_899852, EPI_ISL_899853                                                                                                                                                                                                                                                                                                                                                                                                                                                                                                                                                                                                                 | Viollier AG                                                                                                    | Department of Biosystems Science and Engineering, ETH Zürich                                                               | Chaoran Chen, Sarah Nadeau, Ivan Topolsky, Emmanouil Dermitzakis, Keith Harshman, Ioannis Xenarios, Henri Pegeot, Lorenzo Cerutti, Deborah Penet, Philipp Jablonski, Lara Fuhrmann, David Dreifuss, Katharina Jahn, Christiane Beckmann, Maurice Redondo, Olivier Kobel, Christoph Noppen, Sophie Seidel, Noemie Santamaria de Souza, Niko Beerenwinkel, Tanja Stadler                                                                                                                          |                                                                                                                                                                                                                                                                                                                                                                        |
| EPI_ISL_899854, EPI_ISL_899855, EPI_ISL_899856, EPI_ISL_899857, EPI_ISL_899858, EPI_ISL_899859, EPI_ISL_899860, EPI_ISL_899861, EPI_ISL_899864, EPI_ISL_899865, EPI_ISL_899866, EPI_ISL_899867, EPI_ISL_899868, EPI_ISL_899869, EPI_ISL_899870, EPI_ISL_899872, EPI_ISL_899873, EPI_ISL_899874, EPI_ISL_899882, EPI_ISL_899883, EPI_ISL_899885                                                                                                                                                                                                                                                                                                 | see above                                                                                                      | Viollier AG                                                                                                                | Department of Biosystems Science and Engineering, ETH Zürich                                                                                                                                                                                                                                                                                                                                                                                                                                    | Christian Beisel, Sarah Nadeau, Chaoran Chen, Ivan Topolsky, Philipp Jablonski, Lara Fuhrmann, David Dreifuss, Katharina Jahn, Tobias Schär, Ina Nissen, Natascha Santacroce, Elodie Burcklen, Christiane Beckmann, Maurice Redondo, Olivier Kobel, Christoph Noppen, Sophie Seidel, Noemie Santamaria de Souza, Niko Beerenwinkel, Tanja Stadler                      |
| EPI_ISL_899889, EPI_ISL_899890, EPI_ISL_899891, EPI_ISL_899892, EPI_ISL_899893, EPI_ISL_899894, EPI_ISL_899895, EPI_ISL_899896, EPI_ISL_899899, EPI_ISL_899900, EPI_ISL_899901, EPI_ISL_899902, EPI_ISL_899903, EPI_ISL_899906                                                                                                                                                                                                                                                                                                                                                                                                                 | see above                                                                                                      | Viollier AG                                                                                                                | Department of Biosystems Science and Engineering, ETH Zürich                                                                                                                                                                                                                                                                                                                                                                                                                                    | Chaoran Chen, Sarah Nadeau, Ivan Topolsky, Emmanouil Dermitzakis, Keith Harshman, Ioannis Xenarios, Henri Pegeot, Lorenzo Cerutti, Deborah Penet, Philipp Jablonski, Lara Fuhrmann, David Dreifuss, Katharina Jahn, Christiane Beckmann, Maurice Redondo, Olivier Kobel, Christoph Noppen, Sophie Seidel, Noemie Santamaria de Souza, Niko Beerenwinkel, Tanja Stadler |
| EPI_ISL_899912, EPI_ISL_899913, EPI_ISL_899914, EPI_ISL_899915, EPI_ISL_899916                                                                                                                                                                                                                                                                                                                                                                                                                                                                                                                                                                 | Viollier AG                                                                                                    | Department of Biosystems Science and Engineering, ETH Zürich                                                               | Christian Beisel, Sarah Nadeau, Chaoran Chen, Ivan Topolsky, Philipp Jablonski, Lara Fuhrmann, David Dreifuss, Katharina Jahn, Tobias Schär, Ina Nissen, Natascha Santacroce, Elodie Burcklen, Christiane Beckmann, Maurice Redondo, Olivier Kobel, Christoph Noppen, Sophie Seidel, Noemie Santamaria de Souza, Niko Beerenwinkel, Tanja Stadler                                                                                                                                               |                                                                                                                                                                                                                                                                                                                                                                        |
| EPI_ISL_899917, EPI_ISL_899918, EPI_ISL_899919, EPI_ISL_899922                                                                                                                                                                                                                                                                                                                                                                                                                                                                                                                                                                                 | Viollier AG                                                                                                    | Department of Biosystems Science and Engineering, ETH Zürich                                                               | Chaoran Chen, Sarah Nadeau, Ivan Topolsky, Emmanouil Dermitzakis, Keith Harshman, Ioannis Xenarios, Henri Pegeot, Lorenzo Cerutti, Deborah Penet, Philipp Jablonski, Lara Fuhrmann, David Dreifuss, Katharina Jahn, Christiane Beckmann, Maurice Redondo, Olivier Kobel, Christoph Noppen, Sophie Seidel, Noemie Santamaria de Souza, Niko Beerenwinkel, Tanja Stadler                                                                                                                          |                                                                                                                                                                                                                                                                                                                                                                        |
| EPI_ISL_899974, EPI_ISL_899975, EPI_ISL_899976, EPI_ISL_899977, EPI_ISL_899978, EPI_ISL_899979, EPI_ISL_899980, EPI_ISL_899981, EPI_ISL_899982, EPI_ISL_899983, EPI_ISL_899984, EPI_ISL_899985, EPI_ISL_899986, EPI_ISL_899987, EPI_ISL_899988, EPI_ISL_899989, EPI_ISL_899990, EPI_ISL_899991, EPI_ISL_899992, EPI_ISL_899993, EPI_ISL_899994, EPI_ISL_899995, EPI_ISL_899996, EPI_ISL_899997, EPI_ISL_900008, EPI_ISL_900009, EPI_ISL_900010, EPI_ISL_900011, EPI_ISL_900012, EPI_ISL_900013, EPI_ISL_900014, EPI_ISL_900015, EPI_ISL_900016, EPI_ISL_900017, EPI_ISL_900018, EPI_ISL_900019, EPI_ISL_900020, EPI_ISL_900021, EPI_ISL_900022 | see above                                                                                                      | Viollier AG                                                                                                                | Department of Biosystems Science and Engineering, ETH Zürich                                                                                                                                                                                                                                                                                                                                                                                                                                    | Christian Beisel, Sarah Nadeau, Chaoran Chen, Ivan Topolsky, Philipp Jablonski, Lara Fuhrmann, David Dreifuss, Katharina Jahn, Tobias Schär, Ina Nissen, Natascha Santacroce, Elodie Burcklen, Christiane Beckmann, Maurice Redondo, Olivier Kobel, Christoph Noppen, Sophie Seidel, Noemie Santamaria de Souza, Niko Beerenwinkel, Tanja Stadler                      |
| EPI_ISL_900030, EPI_ISL_900032, EPI_ISL_900035, EPI_ISL_900036, EPI_ISL_900039, EPI_ISL_900040, EPI_ISL_900044, EPI_ISL_900048, EPI_ISL_900049, EPI_ISL_900050, EPI_ISL_900051, EPI_ISL_900052, EPI_ISL_900053                                                                                                                                                                                                                                                                                                                                                                                                                                 | see above                                                                                                      | Viollier AG                                                                                                                | Department of Biosystems Science and Engineering, ETH Zürich                                                                                                                                                                                                                                                                                                                                                                                                                                    | Chaoran Chen, Sarah Nadeau, Ivan Topolsky, Emmanouil Dermitzakis, Keith Harshman, Ioannis Xenarios, Henri Pegeot, Lorenzo Cerutti, Deborah Penet, Philipp Jablonski, Lara Fuhrmann, David Dreifuss, Katharina Jahn, Christiane Beckmann, Maurice Redondo, Olivier Kobel, Christoph Noppen, Sophie Seidel, Noemie Santamaria de Souza, Niko Beerenwinkel, Tanja Stadler |
| EPI_ISL_900511                                                                                                                                                                                                                                                                                                                                                                                                                                                                                                                                                                                                                                 | Oriade                                                                                                         | CNR Virus des Infections Respiratoires - France SUD                                                                        | Antonin Bal, Gregory Destras, Gwendolyne Burfin, Hadrien Règue, Quentin Semanas, Martine Valette, Bruno Lina, Sylvie Larrat, Laurence Josset                                                                                                                                                                                                                                                                                                                                                    |                                                                                                                                                                                                                                                                                                                                                                        |
| EPI_ISL_900524                                                                                                                                                                                                                                                                                                                                                                                                                                                                                                                                                                                                                                 | Labosud                                                                                                        | CNR Virus des Infections Respiratoires - France SUD                                                                        | Antonin Bal, Gregory Destras, Gwendolyne Burfin, Hadrien Règue, Quentin Semanas, Martine Valette, Bruno Lina, Laurence Josset                                                                                                                                                                                                                                                                                                                                                                   |                                                                                                                                                                                                                                                                                                                                                                        |
| EPI_ISL_902751                                                                                                                                                                                                                                                                                                                                                                                                                                                                                                                                                                                                                                 | Ospedale Sandro Pertini ASL Roma2                                                                              | INMI Lazzaro Spallanzani IRCCS                                                                                             | B Bartolini, O Butera, C.E.M Gruber, M Rueca, F Messina, E Giombini, G Cappiello, MC Cava, MR Capobianchi, A Di Caro                                                                                                                                                                                                                                                                                                                                                                            |                                                                                                                                                                                                                                                                                                                                                                        |
| EPI_ISL_902752                                                                                                                                                                                                                                                                                                                                                                                                                                                                                                                                                                                                                                 | Ospedale Sandro Pertini ASL Roma2                                                                              | INMI Lazzaro Spallanzani IRCCS                                                                                             | O Butera, F Messina, C.E.M Gruber, B Bartolini, E Giombini, M Rueca, S Romano, MC Cava, A Di Caro, MR Capobianchi                                                                                                                                                                                                                                                                                                                                                                               |                                                                                                                                                                                                                                                                                                                                                                        |
| EPI_ISL_902753                                                                                                                                                                                                                                                                                                                                                                                                                                                                                                                                                                                                                                 | Azienda Ospedaliera San Camillo Forlanini                                                                      | INMI Lazzaro Spallanzani IRCCS                                                                                             | C.E.M Gruber, B Bartolini, E Giombini, M Rueca, O Butera, F Messina, D.Gallone, G Parisi, A Di Caro, MR Capobianchi                                                                                                                                                                                                                                                                                                                                                                             |                                                                                                                                                                                                                                                                                                                                                                        |
| EPI_ISL_902759, EPI_ISL_902760, EPI_ISL_902761, EPI_ISL_902762, EPI_ISL_902763, EPI_ISL_902764, EPI_ISL_902765, EPI_ISL_902767, EPI_ISL_902916                                                                                                                                                                                                                                                                                                                                                                                                                                                                                                 | Department of Virology and Immunology, University of Helsinki and Helsinki University Hospital, HUSLAB Finland | Department of Virology, Faculty of Medicine, University of Helsinki, Helsinki, Finland                                     | Teemu Smura, Ravi Kant, Phuoc Truong, Hussein Alburkat, Hannimari Kallio-Kokko, Jenni Virtanen, Maija Suvanto, Essi Korhonen, Sari Hannula, Harri Kangas, Hanna Liimatainen, Satu Kurkela, Hanna Jarva, Maija Lappalainen, Pekka Ellonen, Olli Vapalahti                                                                                                                                                                                                                                        |                                                                                                                                                                                                                                                                                                                                                                        |
| EPI_ISL_902929, EPI_ISL_902930, EPI_ISL_902932, EPI_ISL_902935, EPI_ISL_902936, EPI_ISL_902937, EPI_ISL_902938, EPI_ISL_902939, EPI_ISL_902940, EPI_ISL_902941, EPI_ISL_902942, EPI_ISL_902943, EPI_ISL_902944, EPI_ISL_902945, EPI_ISL_902946, EPI_ISL_902947, EPI_ISL_902948                                                                                                                                                                                                                                                                                                                                                                 | see above                                                                                                      | Maryland Public Health Laboratory                                                                                          | Maryland Department of Health Laboratories Administration                                                                                                                                                                                                                                                                                                                                                                                                                                       |                                                                                                                                                                                                                                                                                                                                                                        |
| EPI_ISL_903111, EPI_ISL_903123                                                                                                                                                                                                                                                                                                                                                                                                                                                                                                                                                                                                                 | Washington State Department of Health                                                                          | Seattle Flu Study                                                                                                          | Deborah A. Nickerson, Chris D. Frazar, Jover Lee, Benjamin Pelle, Erica Ryke, Matthew Richardson, Amanda Adler, Elisabeth Brandstetter, Peter D. Han, Kairsten Fay, Misja Ilcisin, Kirsten Lacombe, Thomas R. Sibley, Melissa Truong, Caitlin R. Wolf, Romesh Gautom, Geoff Melly, Brian Hiatt, Philip Dykema, Scott Lindquist, Michael Boeckh, Janet A. Englund, Michael Famulare, Barry R. Lutz, Mark J. Rieder, Lea M. Starita, Matthew Thompson, Helen Y. Chu, Jay Shendure, Trevor Bedford |                                                                                                                                                                                                                                                                                                                                                                        |
| EPI_ISL_903237, EPI_ISL_903238, EPI_ISL_903284, EPI_ISL_903291, EPI_ISL_903293, EPI_ISL_903294, EPI_ISL_903295, EPI_ISL_903299, EPI_ISL_903300, EPI_ISL_903301, EPI_ISL_903302, EPI_ISL_903303, EPI_ISL_903304, EPI_ISL_903305, EPI_ISL_903307, EPI_ISL_903308, EPI_ISL_903309, EPI_ISL_903310, EPI_ISL_903311                                                                                                                                                                                                                                                                                                                                 | see above                                                                                                      | M Health Fairview                                                                                                          | Minnesota Department of Health, Public Health Laboratory                                                                                                                                                                                                                                                                                                                                                                                                                                        | Alexandra Lorentz, Jacob Garfin, Matt Plumb, and Xiong Wang                                                                                                                                                                                                                                                                                                            |
| EPI_ISL_903717                                                                                                                                                                                                                                                                                                                                                                                                                                                                                                                                                                                                                                 | SC Dept of Health and Env. Control-Bureau of Laboratories                                                      | Genomics and Discovery, Respiratory Viruses Branch, Division of Viral Diseases, Centers for Disease Control and Prevention | Krista Queen, Yan Li, Ying Tao, Jing Zhang, Anna Uehara, Anna Montmayeur, Clinton R. Paden, Peter W. Cook, Rachel Marine, Mili Sheth, Jasmine Padilla, Sarah Nobles, Mark Burroughs, Lori Rowe, Haibin Wang, Ben L. Rambo-Martin, Dhvani Batra, Justin Lee, Suxiang Tong                                                                                                                                                                                                                        |                                                                                                                                                                                                                                                                                                                                                                        |
| EPI_ISL_903839                                                                                                                                                                                                                                                                                                                                                                                                                                                                                                                                                                                                                                 | NM Dept. Health, Scientific Laboratory Division                                                                | Genomics and Discovery, Respiratory Viruses Branch, Division of Viral Diseases, Centers for Disease Control and Prevention | Krista Queen, Yan Li, Ying Tao, Jing Zhang, Anna Uehara, Anna Montmayeur, Clinton R. Paden, Peter W. Cook, Rachel Marine, Mili Sheth, Jasmine Padilla, Sarah Nobles, Mark Burroughs, Lori Rowe, Haibin Wang, Ben L. Rambo-Martin, Dhvani Batra, Justin Lee, Suxiang Tong                                                                                                                                                                                                                        |                                                                                                                                                                                                                                                                                                                                                                        |
| EPI_ISL_903872                                                                                                                                                                                                                                                                                                                                                                                                                                                                                                                                                                                                                                 | SC Dept of Health and Env. Control-Bureau of Laboratories                                                      | Genomics and Discovery, Respiratory Viruses Branch, Division of Viral Diseases, Centers for Disease Control and Prevention | Krista Queen, Yan Li, Ying Tao, Jing Zhang, Anna Uehara, Anna Montmayeur, Clinton R. Paden, Peter W. Cook, Rachel Marine, Mili Sheth, Jasmine Padilla, Sarah Nobles, Mark Burroughs, Lori Rowe, Haibin Wang, Ben L. Rambo-Martin, Dhvani Batra, Justin Lee, Suxiang Tong                                                                                                                                                                                                                        |                                                                                                                                                                                                                                                                                                                                                                        |
| EPI_ISL_904043, EPI_ISL_904045, EPI_ISL_904046, EPI_ISL_904047, EPI_ISL_904050, EPI_ISL_904051, EPI_ISL_904055, EPI_ISL_904071, EPI_ISL_904074, EPI_ISL_904079, EPI_ISL_904080, EPI_ISL_904093, EPI_ISL_904101, EPI_ISL_904108, EPI_ISL_904109                                                                                                                                                                                                                                                                                                                                                                                                 | see above                                                                                                      | New Mexico Department of Health Scientific Laboratory                                                                      | Ellie Johnson, Anastacia Griego-Fisher, D'eldra Malone                                                                                                                                                                                                                                                                                                                                                                                                                                          |                                                                                                                                                                                                                                                                                                                                                                        |
| EPI_ISL_904123, EPI_ISL_904124                                                                                                                                                                                                                                                                                                                                                                                                                                                                                                                                                                                                                 | National Institute of Public Health - National Institute of Hygiene                                            | National Institute of Public Health - National Institute of Hygiene                                                        | Wokowicz Tomasz, Zacharczuk Katarzyna                                                                                                                                                                                                                                                                                                                                                                                                                                                           |                                                                                                                                                                                                                                                                                                                                                                        |
| EPI_ISL_904125                                                                                                                                                                                                                                                                                                                                                                                                                                                                                                                                                                                                                                 | Laboratorium Analityczne Szpital Specjalistyczny w Chorzowie                                                   | National Institute of Public Health - National Institute of Hygiene                                                        | Wokowicz Tomasz, Zacharczuk Katarzyna                                                                                                                                                                                                                                                                                                                                                                                                                                                           |                                                                                                                                                                                                                                                                                                                                                                        |



|                                                                                                                |                                                                                                                   |                                                                            |                                                                                                                                                                                                                                                                                                             |
|----------------------------------------------------------------------------------------------------------------|-------------------------------------------------------------------------------------------------------------------|----------------------------------------------------------------------------|-------------------------------------------------------------------------------------------------------------------------------------------------------------------------------------------------------------------------------------------------------------------------------------------------------------|
| see above                                                                                                      | Maine Health and Environmental Testing Laboratory (Maine HETL)                                                    | Tewhey Lab, The Jackson Laboratory                                         | Matluk,N., Dewey,H., Iosue,F., Barter,M., Lynch,R., Munger,H. and Tewhey,R.                                                                                                                                                                                                                                 |
| EPI_ISL_906730, EPI_ISL_906743                                                                                 | Laboratory of Molecular Biology, Diagnostyka sp. z o.o.                                                           | Laboratory of Recombinant Vaccines                                         | Lukasz Rabalski, Maciej Kosinski, Anna Piotrowska-Mietelska,Izabela Szczygieslka, Boguslaw Szewczyk, Krystyna Bienkowska-Szewczyk                                                                                                                                                                           |
| EPI_ISL_906744                                                                                                 | Hematology Laboratory, Section of Molecular Diagnostics, University Clinical Centre, Medical University of Gdansk | Laboratory of Recombinant Vaccines                                         | Lukasz Rabalski, Maciej Kosinski, Maciej Grzybek, Adam Sodal, Aneta Szulc, Krzysztof Lewandowski, Ewa Milosz, Marlena Robakowska, Boguslaw Szewczyk, Krystyna Bienkowska-Szewczyk                                                                                                                           |
| EPI_ISL_906755                                                                                                 | Laboratory of Molecular Biology, Diagnostyka sp. z o.o.                                                           | Laboratory of Recombinant Vaccines                                         | Lukasz Rabalski, Maciej Kosinski, Anna Piotrowska-Mietelska,Izabela Szczygieslka, Boguslaw Szewczyk, Krystyna Bienkowska-Szewczyk                                                                                                                                                                           |
| EPI_ISL_906780, EPI_ISL_906781, EPI_ISL_906790, EPI_ISL_906792                                                 | Center for Genome Research and Biocomputing                                                                       | Center for Genome Research and Biocomputing                                | Oregon State University TRACE Project                                                                                                                                                                                                                                                                       |
| EPI_ISL_906793                                                                                                 | Innlandet Hospital Trust, Division Lillehammer, Department for Medical Microbiology                               | Norwegian Institute of Public Health, Department of Virology               | Kathrine Stene-Johansen, Kamilla Heddeland Instefjord, Hilde Elshaug, Atiya R Ali,Marie Paulsen Madsen, Rasmus Riis Kopperud, Hilde Vollan, Karoline Bragstad, Olav Hungnes                                                                                                                                 |
| EPI_ISL_906797                                                                                                 | Dept. of Medical Microbiology, Stavanger University Hospital, Helse Stavanger HF                                  | Norwegian Institute of Public Health, Department of Virology               | Kathrine Stene-Johansen, Kamilla Heddeland Instefjord, Hilde Elshaug, Atiya R Ali,Marie Paulsen Madsen, Rasmus Riis Kopperud, Hilde Vollan, Karoline Bragstad, Olav Hungnes                                                                                                                                 |
| EPI_ISL_906801, EPI_ISL_906802, EPI_ISL_906803                                                                 | Nordland Hospital - Bodo, Laboratory Department, Molecular Biology Unit                                           | Norwegian Institute of Public Health, Department of Virology               | Kathrine Stene-Johansen, Kamilla Heddeland Instefjord, Hilde Elshaug, Atiya R Ali,Marie Paulsen Madsen, Rasmus Riis Kopperud, Hilde Vollan, Karoline Bragstad, Olav Hungnes                                                                                                                                 |
| EPI_ISL_906808, EPI_ISL_906811                                                                                 | University Hospital of Northern Norway, Department for Microbiology and Infectious Disease Control                | Norwegian Institute of Public Health, Department of Virology               | Kathrine Stene-Johansen, Kamilla Heddeland Instefjord, Hilde Elshaug, Atiya R Ali,Marie Paulsen Madsen, Rasmus Riis Kopperud, Hilde Vollan, Karoline Bragstad, Olav Hungnes                                                                                                                                 |
| EPI_ISL_906821                                                                                                 | Oslo University Hospital, Department of Medical Microbiology                                                      | Norwegian Institute of Public Health, Department of Virology               | Kathrine Stene-Johansen, Kamilla Heddeland Instefjord, Hilde Elshaug, Atiya R Ali,Marie Paulsen Madsen, Rasmus Riis Kopperud, Hilde Vollan, Karoline Bragstad, Olav Hungnes                                                                                                                                 |
| EPI_ISL_906825                                                                                                 | Department of Medical Microbiology - section Molde, Molde Hospital                                                | Norwegian Institute of Public Health, Department of Virology               | Kathrine Stene-Johansen, Kamilla Heddeland Instefjord, Hilde Elshaug, Atiya R Ali,Marie Paulsen Madsen, Rasmus Riis Kopperud, Hilde Vollan, Karoline Bragstad, Olav Hungnes                                                                                                                                 |
| EPI_ISL_906833                                                                                                 | National Public Health Laboratory, National Centre for Infectious Diseases                                        | National Public Health Laboratory, National Centre for Infectious Diseases | Tze Minn Mak, Zhenyang Zhou, Lin Cui, Raymond Tzer Pin Lin                                                                                                                                                                                                                                                  |
| EPI_ISL_906930, EPI_ISL_907074                                                                                 | Infectious Diseases, Qwest Diagnostics                                                                            | Infectious Diseases, Qwest Diagnostics                                     | Rosenthal,S.H., Gerasimova,A., Kagan,R.M., Anderson,B., Bernstein,L.E., Livingston,K.E., Hua,M., Liu,Y., Shalhout,D.F., Owen,R., Lacbawan,F.                                                                                                                                                                |
| EPI_ISL_907119                                                                                                 | Lighthouse Lab in Cambridge                                                                                       | Wellcome Sanger Institute for the COVID-19 Genomics UK (COG-UK) Consortium | Rob Howes, The Lighthouse Lab in Cambridge and Alex Alderton, Roberto Amato, Sonia Goncalves, Ewan Harrison, David K. Jackson, Ian Johnston, Dominic Kwiatkowski, Cordelia Langford, John Sillitoe on behalf of the Wellcome Sanger Institute COVID-19 Surveillance Team                                    |
| EPI_ISL_907120, EPI_ISL_907123, EPI_ISL_907125, EPI_ISL_907129, EPI_ISL_907130, EPI_ISL_907131, EPI_ISL_907132 | Lighthouse Lab in Glasgow                                                                                         | Wellcome Sanger Institute for the COVID-19 Genomics UK (COG-UK) Consortium | Harper VanSteenhouse, Yumi Kasai, David Gray, Carol Clugston, Anna Dominiczak and Alex Alderton, Roberto Amato, Sonia Goncalves, Ewan Harrison, David K. Jackson, Ian Johnston, Dominic Kwiatkowski, Cordelia Langford, John Sillitoe on behalf of the Wellcome Sanger Institute COVID-19 Surveillance Team |
| EPI_ISL_907133                                                                                                 | Lighthouse Lab in Cambridge                                                                                       | Wellcome Sanger Institute for the COVID-19 Genomics UK (COG-UK) Consortium | Rob Howes, The Lighthouse Lab in Cambridge and Alex Alderton, Roberto Amato, Sonia Goncalves, Ewan Harrison, David K. Jackson, Ian Johnston, Dominic Kwiatkowski, Cordelia Langford, John Sillitoe on behalf of the Wellcome Sanger Institute COVID-19 Surveillance Team                                    |
| EPI_ISL_907134                                                                                                 | Lighthouse Lab in Glasgow                                                                                         | Wellcome Sanger Institute for the COVID-19 Genomics UK (COG-UK) Consortium | Harper VanSteenhouse, Yumi Kasai, David Gray, Carol Clugston, Anna Dominiczak and Alex Alderton, Roberto Amato, Sonia Goncalves, Ewan Harrison, David K. Jackson, Ian Johnston, Dominic Kwiatkowski, Cordelia Langford, John Sillitoe on behalf of the Wellcome Sanger Institute COVID-19 Surveillance Team |
| EPI_ISL_907136                                                                                                 | Lighthouse Lab in Cambridge                                                                                       | Wellcome Sanger Institute for the COVID-19 Genomics UK (COG-UK) Consortium | Rob Howes, The Lighthouse Lab in Cambridge and Alex Alderton, Roberto Amato, Sonia Goncalves, Ewan Harrison, David K. Jackson, Ian Johnston, Dominic Kwiatkowski, Cordelia Langford, John Sillitoe on behalf of the Wellcome Sanger Institute COVID-19 Surveillance Team                                    |
| EPI_ISL_907138, EPI_ISL_907142, EPI_ISL_907143, EPI_ISL_907145                                                 | Lighthouse Lab in Glasgow                                                                                         | Wellcome Sanger Institute for the COVID-19 Genomics UK (COG-UK) Consortium | Harper VanSteenhouse, Yumi Kasai, David Gray, Carol Clugston, Anna Dominiczak and Alex Alderton, Roberto Amato, Sonia Goncalves, Ewan Harrison, David K. Jackson, Ian Johnston, Dominic Kwiatkowski, Cordelia Langford, John Sillitoe on behalf of the Wellcome Sanger Institute COVID-19 Surveillance Team |
| EPI_ISL_907147                                                                                                 | Lighthouse Lab in Cambridge                                                                                       | Wellcome Sanger Institute for the COVID-19 Genomics UK (COG-UK) Consortium | Rob Howes, The Lighthouse Lab in Cambridge and Alex Alderton, Roberto Amato, Sonia Goncalves, Ewan Harrison, David K. Jackson, Ian Johnston, Dominic Kwiatkowski, Cordelia Langford, John Sillitoe on behalf of the Wellcome Sanger Institute COVID-19 Surveillance Team                                    |
| EPI_ISL_907150                                                                                                 | Lighthouse Lab in Glasgow                                                                                         | Wellcome Sanger Institute for the COVID-19 Genomics UK (COG-UK) Consortium | Harper VanSteenhouse, Yumi Kasai, David Gray, Carol Clugston, Anna Dominiczak and Alex Alderton, Roberto Amato, Sonia Goncalves, Ewan Harrison, David K. Jackson, Ian Johnston, Dominic Kwiatkowski, Cordelia Langford, John Sillitoe on behalf of the Wellcome Sanger Institute COVID-19 Surveillance Team |
| EPI_ISL_907152                                                                                                 | Lighthouse Lab in Cambridge                                                                                       | Wellcome Sanger Institute for the COVID-19 Genomics UK (COG-UK) Consortium | Rob Howes, The Lighthouse Lab in Cambridge and Alex Alderton, Roberto Amato, Sonia Goncalves, Ewan Harrison, David K. Jackson, Ian Johnston, Dominic Kwiatkowski, Cordelia Langford, John Sillitoe on behalf of the Wellcome Sanger Institute COVID-19 Surveillance Team                                    |
| EPI_ISL_907153, EPI_ISL_907154, EPI_ISL_907156, EPI_ISL_907158, EPI_ISL_907159                                 | Lighthouse Lab in Glasgow                                                                                         | Wellcome Sanger Institute for the COVID-19 Genomics UK (COG-UK) Consortium | Harper VanSteenhouse, Yumi Kasai, David Gray, Carol Clugston, Anna Dominiczak and Alex Alderton, Roberto Amato, Sonia Goncalves, Ewan Harrison, David K. Jackson, Ian Johnston, Dominic Kwiatkowski, Cordelia Langford, John Sillitoe on behalf of the Wellcome Sanger Institute COVID-19 Surveillance Team |
| EPI_ISL_907160                                                                                                 | Lighthouse Lab in Cambridge                                                                                       | Wellcome Sanger Institute for the COVID-19 Genomics UK (COG-UK) Consortium | Rob Howes, The Lighthouse Lab in Cambridge and Alex Alderton, Roberto Amato, Sonia Goncalves, Ewan Harrison, David K. Jackson, Ian Johnston, Dominic Kwiatkowski, Cordelia Langford, John Sillitoe on behalf of the Wellcome Sanger Institute COVID-19 Surveillance Team                                    |
| EPI_ISL_907162                                                                                                 | Lighthouse Lab in Glasgow                                                                                         | Wellcome Sanger Institute for the COVID-19 Genomics UK (COG-UK) Consortium | Harper VanSteenhouse, Yumi Kasai, David Gray, Carol Clugston, Anna Dominiczak and Alex Alderton, Roberto Amato, Sonia Goncalves, Ewan Harrison, David K. Jackson, Ian Johnston, Dominic Kwiatkowski, Cordelia Langford, John Sillitoe on behalf of the Wellcome Sanger Institute COVID-19 Surveillance Team |
| EPI_ISL_907164                                                                                                 | Lighthouse Lab in Cambridge                                                                                       | Wellcome Sanger Institute for the COVID-19 Genomics UK (COG-UK) Consortium | Rob Howes, The Lighthouse Lab in Cambridge and Alex Alderton, Roberto Amato, Sonia Goncalves, Ewan Harrison, David K. Jackson, Ian Johnston, Dominic Kwiatkowski, Cordelia Langford, John Sillitoe on behalf of the Wellcome Sanger Institute COVID-19 Surveillance Team                                    |
| EPI_ISL_907165, EPI_ISL_907166                                                                                 | Lighthouse Lab in Glasgow                                                                                         | Wellcome Sanger Institute for the COVID-19 Genomics UK (COG-UK) Consortium | Harper VanSteenhouse, Yumi Kasai, David Gray, Carol Clugston, Anna Dominiczak and Alex Alderton, Roberto Amato, Sonia Goncalves, Ewan Harrison, David K. Jackson, Ian Johnston, Dominic Kwiatkowski, Cordelia Langford, John Sillitoe on behalf of the Wellcome Sanger Institute COVID-19 Surveillance Team |
| EPI_ISL_907168                                                                                                 | Lighthouse Lab in Cambridge                                                                                       | Wellcome Sanger Institute for the COVID-19 Genomics UK (COG-UK) Consortium | Rob Howes, The Lighthouse Lab in Cambridge and Alex Alderton, Roberto Amato, Sonia Goncalves, Ewan Harrison, David K. Jackson, Ian Johnston, Dominic Kwiatkowski, Cordelia Langford, John Sillitoe on behalf of the Wellcome Sanger Institute COVID-19 Surveillance Team                                    |
| EPI_ISL_907169, EPI_ISL_907170, EPI_ISL_907171                                                                 | Lighthouse Lab in Glasgow                                                                                         | Wellcome Sanger Institute for the COVID-19 Genomics UK (COG-UK) Consortium | Harper VanSteenhouse, Yumi Kasai, David Gray, Carol Clugston, Anna Dominiczak and Alex Alderton, Roberto Amato, Sonia Goncalves, Ewan Harrison, David K. Jackson, Ian Johnston, Dominic Kwiatkowski, Cordelia Langford, John Sillitoe on behalf of the Wellcome Sanger Institute COVID-19 Surveillance Team |
| EPI_ISL_907173                                                                                                 | Lighthouse Lab in Cambridge                                                                                       | Wellcome Sanger Institute for the COVID-19 Genomics UK (COG-UK) Consortium | Rob Howes, The Lighthouse Lab in Cambridge and Alex Alderton, Roberto Amato, Sonia Goncalves, Ewan Harrison, David K. Jackson, Ian Johnston, Dominic Kwiatkowski, Cordelia Langford, John Sillitoe on behalf of the Wellcome Sanger Institute COVID-19 Surveillance Team                                    |
| EPI_ISL_907174                                                                                                 | Lighthouse Lab in Glasgow                                                                                         | Wellcome Sanger Institute for the COVID-19 Genomics UK (COG-UK) Consortium | Harper VanSteenhouse, Yumi Kasai, David Gray, Carol Clugston, Anna Dominiczak and Alex Alderton, Roberto Amato, Sonia Goncalves, Ewan Harrison, David K. Jackson, Ian Johnston, Dominic Kwiatkowski, Cordelia Langford, John Sillitoe on behalf of the Wellcome Sanger Institute COVID-19 Surveillance Team |
| EPI_ISL_907179                                                                                                 | Lighthouse Lab in Cambridge                                                                                       | Wellcome Sanger Institute for the COVID-19 Genomics UK (COG-UK) Consortium | Rob Howes, The Lighthouse Lab in Cambridge and Alex Alderton, Roberto Amato, Sonia Goncalves, Ewan Harrison, David K. Jackson, Ian Johnston, Dominic Kwiatkowski, Cordelia Langford, John Sillitoe on behalf of the Wellcome Sanger Institute COVID-19 Surveillance Team                                    |
| EPI_ISL_907185                                                                                                 | Lighthouse Lab in Glasgow                                                                                         | Wellcome Sanger Institute for the COVID-19 Genomics UK                     | Harper VanSteenhouse, Yumi Kasai, David Gray, Carol Clugston, Anna Dominiczak and Alex Alderton, Roberto Amato, Sonia Goncalves, Ewan Harrison,                                                                                                                                                             |

[illegible]



[illegible]

[illegible]

[illegible]

[illegible]

[illegible]





[illegible]



[illegible]

[illegible]

[illegible]

[illegible]

[illegible]

[illegible]

[illegible]

[illegible]



[illegible]



|                                                                                                                                                                                                                                                                                                                                                                                                                                                                                                                                                                                                                                                                                                                                                                                                                                                                                                |                                                                         |                                                                                                                                            |                                                                                                                                                                                   |
|------------------------------------------------------------------------------------------------------------------------------------------------------------------------------------------------------------------------------------------------------------------------------------------------------------------------------------------------------------------------------------------------------------------------------------------------------------------------------------------------------------------------------------------------------------------------------------------------------------------------------------------------------------------------------------------------------------------------------------------------------------------------------------------------------------------------------------------------------------------------------------------------|-------------------------------------------------------------------------|--------------------------------------------------------------------------------------------------------------------------------------------|-----------------------------------------------------------------------------------------------------------------------------------------------------------------------------------|
| EPI_ISL_912438, EPI_ISL_912439, EPI_ISL_912440, EPI_ISL_912441, EPI_ISL_912442, EPI_ISL_912443, EPI_ISL_912444, EPI_ISL_912445, EPI_ISL_912446, EPI_ISL_912447, EPI_ISL_912448, EPI_ISL_912450, EPI_ISL_912453, EPI_ISL_912454, EPI_ISL_912455                                                                                                                                                                                                                                                                                                                                                                                                                                                                                                                                                                                                                                                 |                                                                         |                                                                                                                                            |                                                                                                                                                                                   |
| see above                                                                                                                                                                                                                                                                                                                                                                                                                                                                                                                                                                                                                                                                                                                                                                                                                                                                                      | KU Leuven, Rega Institute, Clinical and Epidemiological Virology        | KU Leuven, Rega Institute, Clinical and Epidemiological Virology                                                                           | Tony Wawina-Bokalanga, Bert Vanmechelen, Joan Marti-Carerras, Piet Maes                                                                                                           |
| EPI_ISL_912549                                                                                                                                                                                                                                                                                                                                                                                                                                                                                                                                                                                                                                                                                                                                                                                                                                                                                 | Labo Analyses Med                                                       | National Reference Center for Viruses of Respiratory Infections, Institut Pasteur, Paris                                                   | Marion Barbet, Sylvie Behillil, Méline Bizard, Angela Brisebarre, Camille Capel, Etienne Simon-Lorière, Vincent Enouf, Maud Vanpeene, Sylvie van der Werf                         |
| EPI_ISL_912555                                                                                                                                                                                                                                                                                                                                                                                                                                                                                                                                                                                                                                                                                                                                                                                                                                                                                 | C.H.R. d'Orléans - Hôpital de la Source                                 | National Reference Center for Viruses of Respiratory Infections, Institut Pasteur, Paris                                                   | Marion Barbet, Sylvie Behillil, Méline Bizard, Angela Brisebarre, Camille Capel, Etienne Simon-Lorière, Vincent Enouf, Maud Vanpeene, Sylvie van der Werf,Guinard Jérôme          |
| EPI_ISL_912557, EPI_ISL_912558                                                                                                                                                                                                                                                                                                                                                                                                                                                                                                                                                                                                                                                                                                                                                                                                                                                                 | Centre Hospitalier de Gisors Route de Rouen                             | National Reference Center for Viruses of Respiratory Infections, Institut Pasteur, Paris                                                   | Marion Barbet, Sylvie Behillil, Méline Bizard, Angela Brisebarre, Camille Capel, Etienne Simon-Lorière, Vincent Enouf, Maud Vanpeene, Sylvie van der Werf                         |
| EPI_ISL_912559                                                                                                                                                                                                                                                                                                                                                                                                                                                                                                                                                                                                                                                                                                                                                                                                                                                                                 | Hopital Avicenne Laboratoire central de bactériologie virologie hygiène | National Reference Center for Viruses of Respiratory Infections, Institut Pasteur, Paris                                                   | Marion Barbet, Sylvie Behillil, Méline Bizard, Angela Brisebarre, Camille Capel, Etienne Simon-Lorière, Vincent Enouf, Maud Vanpeene, Sylvie van der Werf,Brichler Ségolène       |
| EPI_ISL_912561, EPI_ISL_912562                                                                                                                                                                                                                                                                                                                                                                                                                                                                                                                                                                                                                                                                                                                                                                                                                                                                 | HOPITAL SIMONE VEIL                                                     | National Reference Center for Viruses of Respiratory Infections, Institut Pasteur, Paris                                                   | Marion Barbet, Sylvie Behillil, Méline Bizard, Angela Brisebarre, Camille Capel, Etienne Simon-Lorière, Vincent Enouf, Maud Vanpeene, Sylvie van der Werf,Moreau Farida           |
| EPI_ISL_912563, EPI_ISL_912564                                                                                                                                                                                                                                                                                                                                                                                                                                                                                                                                                                                                                                                                                                                                                                                                                                                                 | Laboratoire Central - American Hospital of Paris                        | National Reference Center for Viruses of Respiratory Infections, Institut Pasteur, Paris                                                   | Marion Barbet, Sylvie Behillil, Méline Bizard, Angela Brisebarre, Camille Capel, Etienne Simon-Lorière, Vincent Enouf, Maud Vanpeene, Sylvie van der Werf,Ramirez José-Manuel     |
| EPI_ISL_912565                                                                                                                                                                                                                                                                                                                                                                                                                                                                                                                                                                                                                                                                                                                                                                                                                                                                                 | Laboratoire de Virologie du CHU de Lille Bâtiment Paul Boulanger        | National Reference Center for Viruses of Respiratory Infections, Institut Pasteur, Paris                                                   | Marion Barbet, Sylvie Behillil, Méline Bizard, Angela Brisebarre, Camille Capel, Etienne Simon-Lorière, Vincent Enouf, Maud Vanpeene, Sylvie van der Werf,Guigon Aurélie          |
| EPI_ISL_912566                                                                                                                                                                                                                                                                                                                                                                                                                                                                                                                                                                                                                                                                                                                                                                                                                                                                                 | Hopital                                                                 | National Reference Center for Viruses of Respiratory Infections, Institut Pasteur, Paris                                                   | Marion Barbet, Sylvie Behillil, Méline Bizard, Angela Brisebarre, Camille Capel, Etienne Simon-Lorière, Vincent Enouf, Maud Vanpeene, Sylvie van der Werf                         |
| EPI_ISL_912568                                                                                                                                                                                                                                                                                                                                                                                                                                                                                                                                                                                                                                                                                                                                                                                                                                                                                 | Laboratoire de Virologie du CHU de Lille Bâtiment Paul Boulanger        | National Reference Center for Viruses of Respiratory Infections, Institut Pasteur, Paris                                                   | Marion Barbet, Sylvie Behillil, Méline Bizard, Angela Brisebarre, Camille Capel, Etienne Simon-Lorière, Vincent Enouf, Maud Vanpeene, Sylvie van der Werf,Guigon Aurélie          |
| EPI_ISL_912573                                                                                                                                                                                                                                                                                                                                                                                                                                                                                                                                                                                                                                                                                                                                                                                                                                                                                 | C.H.R. d'Orléans - Hôpital de la Source                                 | National Reference Center for Viruses of Respiratory Infections, Institut Pasteur, Paris                                                   | Marion Barbet, Sylvie Behillil, Méline Bizard, Angela Brisebarre, Camille Capel, Etienne Simon-Lorière, Vincent Enouf, Maud Vanpeene, Sylvie van der Werf,Guinard Jérôme          |
| EPI_ISL_912575, EPI_ISL_912576, EPI_ISL_912577, EPI_ISL_912578                                                                                                                                                                                                                                                                                                                                                                                                                                                                                                                                                                                                                                                                                                                                                                                                                                 | Laboratoire de Virologie du CHU de Lille Bâtiment Paul Boulanger        | National Reference Center for Viruses of Respiratory Infections, Institut Pasteur, Paris                                                   | Marion Barbet, Sylvie Behillil, Méline Bizard, Angela Brisebarre, Camille Capel, Etienne Simon-Lorière, Vincent Enouf, Maud Vanpeene, Sylvie van der Werf,Guigon Aurélie          |
| EPI_ISL_912579                                                                                                                                                                                                                                                                                                                                                                                                                                                                                                                                                                                                                                                                                                                                                                                                                                                                                 | Service Biologie -CH de Versailles                                      | National Reference Center for Viruses of Respiratory Infections, Institut Pasteur, Paris                                                   | Marion Barbet, Sylvie Behillil, Méline Bizard, Angela Brisebarre, Camille Capel, Etienne Simon-Lorière, Vincent Enouf, Maud Vanpeene, Sylvie van der Werf,Marque Juliet StéPhanie |
| EPI_ISL_912580, EPI_ISL_912581, EPI_ISL_912583                                                                                                                                                                                                                                                                                                                                                                                                                                                                                                                                                                                                                                                                                                                                                                                                                                                 | CENTRE HOSPITALIER LEON BINET                                           | National Reference Center for Viruses of Respiratory Infections, Institut Pasteur, Paris                                                   | Marion Barbet, Sylvie Behillil, Méline Bizard, Angela Brisebarre, Camille Capel, Etienne Simon-Lorière, Vincent Enouf, Maud Vanpeene, Sylvie van der Werf,Meziane Ilham           |
| EPI_ISL_912602                                                                                                                                                                                                                                                                                                                                                                                                                                                                                                                                                                                                                                                                                                                                                                                                                                                                                 | Laboratoire de Virologie du CHU de Lille Bâtiment Paul Boulanger        | National Reference Center for Viruses of Respiratory Infections, Institut Pasteur, Paris                                                   | Marion Barbet, Sylvie Behillil, Méline Bizard, Angela Brisebarre, Camille Capel, Etienne Simon-Lorière, Vincent Enouf, Maud Vanpeene, Sylvie van der Werf,Guigon Aurélie          |
| EPI_ISL_912612, EPI_ISL_912613                                                                                                                                                                                                                                                                                                                                                                                                                                                                                                                                                                                                                                                                                                                                                                                                                                                                 | Centre Hospitalier de Compiègne Laboratoire Compiègne                   | National Reference Center for Viruses of Respiratory Infections, Institut Pasteur, Paris                                                   | Marion Barbet, Sylvie Behillil, Méline Bizard, Angela Brisebarre, Camille Capel, Etienne Simon-Lorière, Vincent Enouf, Maud Vanpeene, Sylvie van der Werf,Romand Sylvie           |
| EPI_ISL_912614                                                                                                                                                                                                                                                                                                                                                                                                                                                                                                                                                                                                                                                                                                                                                                                                                                                                                 | CENTRE HOSPITALIER JACQUES LACARIN LABORATOIRE                          | National Reference Center for Viruses of Respiratory Infections, Institut Pasteur, Paris                                                   | Marion Barbet, Sylvie Behillil, Méline Bizard, Angela Brisebarre, Camille Capel, Etienne Simon-Lorière, Vincent Enouf, Maud Vanpeene, Sylvie van der Werf                         |
| EPI_ISL_912617, EPI_ISL_912619, EPI_ISL_912620                                                                                                                                                                                                                                                                                                                                                                                                                                                                                                                                                                                                                                                                                                                                                                                                                                                 | Labo Analyses Med                                                       | National Reference Center for Viruses of Respiratory Infections, Institut Pasteur, Paris                                                   | Marion Barbet, Sylvie Behillil, Méline Bizard, Angela Brisebarre, Camille Capel, Etienne Simon-Lorière, Vincent Enouf, Maud Vanpeene, Sylvie van der Werf,Le Vicky                |
| EPI_ISL_912621                                                                                                                                                                                                                                                                                                                                                                                                                                                                                                                                                                                                                                                                                                                                                                                                                                                                                 | HOPITAL YVES LE FOLL Laboratoire de Biologie Médicale                   | National Reference Center for Viruses of Respiratory Infections, Institut Pasteur, Paris                                                   | Marion Barbet, Sylvie Behillil, Méline Bizard, Angela Brisebarre, Camille Capel, Etienne Simon-Lorière, Vincent Enouf, Maud Vanpeene, Sylvie van der Werf,Chrevet Laurent         |
| EPI_ISL_912722, EPI_ISL_912725, EPI_ISL_912726, EPI_ISL_912729, EPI_ISL_912730, EPI_ISL_912731, EPI_ISL_912733, EPI_ISL_912739, EPI_ISL_912749, EPI_ISL_912754, EPI_ISL_912755, EPI_ISL_912757, EPI_ISL_912758, EPI_ISL_912761, EPI_ISL_912762, EPI_ISL_912765, EPI_ISL_912766, EPI_ISL_912767, EPI_ISL_912768, EPI_ISL_912769, EPI_ISL_912770, EPI_ISL_912772, EPI_ISL_912773, EPI_ISL_912776, EPI_ISL_912778, EPI_ISL_912779, EPI_ISL_912780                                                                                                                                                                                                                                                                                                                                                                                                                                                 |                                                                         |                                                                                                                                            |                                                                                                                                                                                   |
| see above                                                                                                                                                                                                                                                                                                                                                                                                                                                                                                                                                                                                                                                                                                                                                                                                                                                                                      | Hôpital Henri Mondor                                                    | Department of Virology, Henri Mondor University Hospital, Assistance Publique Hôpitaux de Paris, Université Paris-Est Créteil, INSERM U955 | Christophe Rodriguez, Slim Fourati, Vanessa Demontant, Guillaume Gricourt, Melissa N'Debi, Alexandre Soulier, Elisabeth Trawinski, Jean-Michel Pawlotsky                          |
| EPI_ISL_912781, EPI_ISL_912782, EPI_ISL_912783, EPI_ISL_912784                                                                                                                                                                                                                                                                                                                                                                                                                                                                                                                                                                                                                                                                                                                                                                                                                                 | CH.INTERCOMMUNAL DE CRETEIL                                             | Department of Virology, Henri Mondor University Hospital, Assistance Publique Hôpitaux de Paris, Université Paris-Est Créteil, INSERM U955 | Christophe Rodriguez, Slim Fourati, Vanessa Demontant, Guillaume Gricourt, Melissa N'Debi, Alexandre Soulier, Elisabeth Trawinski, Jean-Michel Pawlotsky                          |
| EPI_ISL_912789, EPI_ISL_912792, EPI_ISL_912793, EPI_ISL_912794                                                                                                                                                                                                                                                                                                                                                                                                                                                                                                                                                                                                                                                                                                                                                                                                                                 | Hôpital Pitié-Salpêtrière                                               | Department of Virology, Henri Mondor University Hospital, Assistance Publique Hôpitaux de Paris, Université Paris-Est Créteil, INSERM U955 | Christophe Rodriguez, Slim Fourati, Vanessa Demontant, Guillaume Gricourt, Melissa N'Debi, Alexandre Soulier, Elisabeth Trawinski, Jean-Michel Pawlotsky                          |
| EPI_ISL_912796, EPI_ISL_912797, EPI_ISL_912798, EPI_ISL_912799, EPI_ISL_912802, EPI_ISL_912804, EPI_ISL_912806, EPI_ISL_912807, EPI_ISL_912808, EPI_ISL_912810, EPI_ISL_912843, EPI_ISL_912846, EPI_ISL_912848, EPI_ISL_912849, EPI_ISL_912850, EPI_ISL_912853, EPI_ISL_912854, EPI_ISL_912855, EPI_ISL_912856, EPI_ISL_912858, EPI_ISL_912859, EPI_ISL_912861, EPI_ISL_912862, EPI_ISL_912863, EPI_ISL_912864, EPI_ISL_912868, EPI_ISL_912869, EPI_ISL_912870, EPI_ISL_912874, EPI_ISL_912875, EPI_ISL_912876, EPI_ISL_912877, EPI_ISL_912878, EPI_ISL_912881, EPI_ISL_912882, EPI_ISL_912884, EPI_ISL_912886, EPI_ISL_912887, EPI_ISL_912944, EPI_ISL_912945, EPI_ISL_912946, EPI_ISL_912947, EPI_ISL_912948, EPI_ISL_912950, EPI_ISL_912951, EPI_ISL_912952, EPI_ISL_912954, EPI_ISL_912955, EPI_ISL_912956, EPI_ISL_912957, EPI_ISL_912958, EPI_ISL_912959, EPI_ISL_912960, EPI_ISL_912978 |                                                                         |                                                                                                                                            |                                                                                                                                                                                   |
| see above                                                                                                                                                                                                                                                                                                                                                                                                                                                                                                                                                                                                                                                                                                                                                                                                                                                                                      | Hôpital Henri Mondor                                                    | Department of Virology, Henri Mondor University Hospital, Assistance Publique Hôpitaux de Paris, Université Paris-Est Créteil, INSERM U955 | Christophe Rodriguez, Slim Fourati, Vanessa Demontant, Guillaume Gricourt, Melissa N'Debi, Alexandre Soulier, Elisabeth Trawinski, Jean-Michel Pawlotsky                          |
| EPI_ISL_913025, EPI_ISL_913027, EPI_ISL_913029, EPI_ISL_913030, EPI_ISL_913031                                                                                                                                                                                                                                                                                                                                                                                                                                                                                                                                                                                                                                                                                                                                                                                                                 | Hospital los Arcos                                                      | Instituto de Salud Carlos III                                                                                                              | Iglesias-Caballero, M. Camarero, S. Sandonis,V. Vázquez, S. Pozo, F. Casas, I. Jiménez, P. Zaballos, A. Monzón, S. Varona, S. Cuesta, I. Cámara, M.                               |
| EPI_ISL_913032, EPI_ISL_913034, EPI_ISL_913035                                                                                                                                                                                                                                                                                                                                                                                                                                                                                                                                                                                                                                                                                                                                                                                                                                                 | Hospital San Pedro de Alcántara                                         | Instituto de Salud Carlos III                                                                                                              | Iglesias-Caballero, M. Camarero, S. Sandonis,V. Vázquez, S. Pozo, F. Casas, I. Jiménez, P. Zaballos, A. Monzón, S. Varona, S. Cuesta, I. Rodríguez, G.                            |
| EPI_ISL_913036                                                                                                                                                                                                                                                                                                                                                                                                                                                                                                                                                                                                                                                                                                                                                                                                                                                                                 | Hospital los Arcos                                                      | Instituto de Salud Carlos III                                                                                                              | Iglesias-Caballero, M. Camarero, S. Sandonis,V. Vázquez, S. Pozo, F. Casas, I. Jiménez, P. Zaballos, A. Monzón, S. Varona, S. Cuesta, I. Cámara, M.                               |
| EPI_ISL_913043, EPI_ISL_913044, EPI_ISL_913045, EPI_ISL_913046, EPI_ISL_913047                                                                                                                                                                                                                                                                                                                                                                                                                                                                                                                                                                                                                                                                                                                                                                                                                 | Hospital Comarcal Sierrallana                                           | Instituto de Salud Carlos III                                                                                                              | Iglesias-Caballero, M. Camarero, S. Sandonis,V. Vázquez, S. Pozo, F. Casas, I. Jiménez, P. Zaballos, A. Monzón, S. Varona, S. Cuesta, I. De Benito, I.                            |
| EPI_ISL_913054, EPI_ISL_913055, EPI_ISL_913056                                                                                                                                                                                                                                                                                                                                                                                                                                                                                                                                                                                                                                                                                                                                                                                                                                                 | Hospital Universitario de Ceuta                                         | Instituto de Salud Carlos III                                                                                                              | Iglesias-Caballero, M. Camarero, S. Sandonis,V. Vázquez, S. Pozo, F. Casas, I. Jiménez, P. Zaballos, A. Monzón, S. Varona, S. Cuesta, I. López, J.                                |
| EPI_ISL_913057                                                                                                                                                                                                                                                                                                                                                                                                                                                                                                                                                                                                                                                                                                                                                                                                                                                                                 | Hospital San Pedro de Alcántara                                         | Instituto de Salud Carlos III                                                                                                              | Iglesias-Caballero, M. Camarero, S. Sandonis,V. Vázquez, S. Pozo, F. Casas, I. Jiménez, P. Zaballos, A. Monzón, S. Varona, S. Cuesta, I. Rodríguez, G.                            |
| EPI_ISL_913058                                                                                                                                                                                                                                                                                                                                                                                                                                                                                                                                                                                                                                                                                                                                                                                                                                                                                 | Hospital Universitario de Ceuta                                         | Instituto de Salud Carlos III                                                                                                              | Iglesias-Caballero, M. Camarero, S. Sandonis,V. Vázquez, S. Pozo, F. Casas, I. Jiménez, P. Zaballos, A. Monzón, S. Varona, S. Cuesta, I. López, J.                                |
| EPI_ISL_913059                                                                                                                                                                                                                                                                                                                                                                                                                                                                                                                                                                                                                                                                                                                                                                                                                                                                                 | Consejería de Sanidad y Asuntos Sociales                                | Instituto de Salud Carlos III                                                                                                              | Iglesias-Caballero, M. Camarero, S. Sandonis,V. Vázquez, S. Pozo, F. Casas, I. Jiménez, P. Zaballos, A. Monzón, S. Varona, S. Cuesta, I. Gutiérrez, G.                            |
| EPI_ISL_913061, EPI_ISL_913062                                                                                                                                                                                                                                                                                                                                                                                                                                                                                                                                                                                                                                                                                                                                                                                                                                                                 | Hospital Nuestra Señora de Sonsoles                                     | Instituto de Salud Carlos III                                                                                                              | Iglesias-Caballero, M. Camarero, S. Sandonis,V. Vázquez, S. Pozo, F. Casas, I. Jiménez, P. Zaballos, A. Monzón, S. Varona, S. Cuesta, I. Sánchez, R.                              |

|                                                                                                                                                                                                                                                                                                                                                                                                                                                                                                                                                                                                |                                                                        |                                                                                |                                                                                                                                                                                                                         |
|------------------------------------------------------------------------------------------------------------------------------------------------------------------------------------------------------------------------------------------------------------------------------------------------------------------------------------------------------------------------------------------------------------------------------------------------------------------------------------------------------------------------------------------------------------------------------------------------|------------------------------------------------------------------------|--------------------------------------------------------------------------------|-------------------------------------------------------------------------------------------------------------------------------------------------------------------------------------------------------------------------|
| EPI_ISL_913114                                                                                                                                                                                                                                                                                                                                                                                                                                                                                                                                                                                 | CHU Purpan - Laboratoire de Virologie - Institut Fédératif de Biologie | CHU Purpan - Laboratoire de Virologie - Institut Fédératif de Biologie         | Latour J., Ranger N., Dubois M., Carcenac R., Harter A., Boyer P., Tremaux P., Izopet J.                                                                                                                                |
| EPI_ISL_913194                                                                                                                                                                                                                                                                                                                                                                                                                                                                                                                                                                                 | University of Michigan Clinical Microbiology Laboratory                | Lauring Lab, University of Michigan, Department of Microbiology and Immunology | Valesano                                                                                                                                                                                                                |
| EPI_ISL_913256, EPI_ISL_913257                                                                                                                                                                                                                                                                                                                                                                                                                                                                                                                                                                 | Synlab Medilab, Mikrobiologi                                           | The Public Health Agency of Sweden                                             | Anna-Malin Linde, Maria Lind Karlberg, Carlo Berg, Oskar Karlsson Lindsjo, Sofia Stamouli, Reza Advani, Mattias Haukland, Petra Holmstrom, Noura Walai, Petra Edquist, Mia Brytting, Anna Risberg, Karin Tegmark-Wisell |
| EPI_ISL_913263                                                                                                                                                                                                                                                                                                                                                                                                                                                                                                                                                                                 | The Public Health Agency of Sweden                                     | The Public Health Agency of Sweden                                             | Anna-Malin Linde, Maria Lind Karlberg, Carlo Berg, Oskar Karlsson Lindsjo, Sofia Stamouli, Reza Advani, Mattias Haukland, Petra Holmstrom, Noura Walai, Petra Edquist, Mia Brytting, Anna Risberg, Karin Tegmark-Wisell |
| EPI_ISL_913266                                                                                                                                                                                                                                                                                                                                                                                                                                                                                                                                                                                 | Unilabs AB Skovde                                                      | The Public Health Agency of Sweden                                             | Anna-Malin Linde, Maria Lind Karlberg, Carlo Berg, Oskar Karlsson Lindsjo, Sofia Stamouli, Reza Advani, Mattias Haukland, Petra Holmstrom, Noura Walai, Petra Edquist, Mia Brytting, Anna Risberg, Karin Tegmark-Wisell |
| EPI_ISL_913268                                                                                                                                                                                                                                                                                                                                                                                                                                                                                                                                                                                 | Klinisk mikrobiologi                                                   | The Public Health Agency of Sweden                                             | Anna-Malin Linde, Maria Lind Karlberg, Carlo Berg, Oskar Karlsson Lindsjo, Sofia Stamouli, Reza Advani, Mattias Haukland, Petra Holmstrom, Noura Walai, Petra Edquist, Mia Brytting, Anna Risberg, Karin Tegmark-Wisell |
| EPI_ISL_913275, EPI_ISL_913277, EPI_ISL_913281                                                                                                                                                                                                                                                                                                                                                                                                                                                                                                                                                 | Dynamic Code AB                                                        | The Public Health Agency of Sweden                                             | Anna-Malin Linde, Maria Lind Karlberg, Carlo Berg, Oskar Karlsson Lindsjo, Sofia Stamouli, Reza Advani, Mattias Haukland, Petra Holmstrom, Noura Walai, Petra Edquist, Mia Brytting, Anna Risberg, Karin Tegmark-Wisell |
| EPI_ISL_913283, EPI_ISL_913297                                                                                                                                                                                                                                                                                                                                                                                                                                                                                                                                                                 | Klinisk mikrobiologi                                                   | The Public Health Agency of Sweden                                             | Anna-Malin Linde, Maria Lind Karlberg, Carlo Berg, Oskar Karlsson Lindsjo, Sofia Stamouli, Reza Advani, Mattias Haukland, Petra Holmstrom, Noura Walai, Petra Edquist, Mia Brytting, Anna Risberg, Karin Tegmark-Wisell |
| EPI_ISL_913298, EPI_ISL_913299                                                                                                                                                                                                                                                                                                                                                                                                                                                                                                                                                                 | Klinisk Mikrobiologi                                                   | The Public Health Agency of Sweden                                             | Anna-Malin Linde, Maria Lind Karlberg, Carlo Berg, Oskar Karlsson Lindsjo, Sofia Stamouli, Reza Advani, Mattias Haukland, Petra Holmstrom, Noura Walai, Petra Edquist, Mia Brytting, Anna Risberg, Karin Tegmark-Wisell |
| EPI_ISL_913301, EPI_ISL_913303, EPI_ISL_913304                                                                                                                                                                                                                                                                                                                                                                                                                                                                                                                                                 | Synlab Medilab, Mikrobiologi                                           | The Public Health Agency of Sweden                                             | Anna-Malin Linde, Maria Lind Karlberg, Carlo Berg, Oskar Karlsson Lindsjo, Sofia Stamouli, Reza Advani, Mattias Haukland, Petra Holmstrom, Noura Walai, Petra Edquist, Mia Brytting, Anna Risberg, Karin Tegmark-Wisell |
| EPI_ISL_913309                                                                                                                                                                                                                                                                                                                                                                                                                                                                                                                                                                                 | Dynamic Code AB                                                        | The Public Health Agency of Sweden                                             | Anna-Malin Linde, Maria Lind Karlberg, Carlo Berg, Oskar Karlsson Lindsjo, Sofia Stamouli, Reza Advani, Mattias Haukland, Petra Holmstrom, Noura Walai, Petra Edquist, Mia Brytting, Anna Risberg, Karin Tegmark-Wisell |
| EPI_ISL_913312                                                                                                                                                                                                                                                                                                                                                                                                                                                                                                                                                                                 | Mikrobiologen                                                          | The Public Health Agency of Sweden                                             | Anna-Malin Linde, Maria Lind Karlberg, Carlo Berg, Oskar Karlsson Lindsjo, Sofia Stamouli, Reza Advani, Mattias Haukland, Petra Holmstrom, Noura Walai, Petra Edquist, Mia Brytting, Anna Risberg, Karin Tegmark-Wisell |
| EPI_ISL_913328                                                                                                                                                                                                                                                                                                                                                                                                                                                                                                                                                                                 | Klinisk mikrobiologi                                                   | The Public Health Agency of Sweden                                             | Anna-Malin Linde, Maria Lind Karlberg, Carlo Berg, Oskar Karlsson Lindsjo, Sofia Stamouli, Reza Advani, Mattias Haukland, Petra Holmstrom, Noura Walai, Petra Edquist, Mia Brytting, Anna Risberg, Karin Tegmark-Wisell |
| EPI_ISL_913330, EPI_ISL_913331, EPI_ISL_913332, EPI_ISL_913333                                                                                                                                                                                                                                                                                                                                                                                                                                                                                                                                 | Mikrobiologen                                                          | The Public Health Agency of Sweden                                             | Anna-Malin Linde, Maria Lind Karlberg, Carlo Berg, Oskar Karlsson Lindsjo, Sofia Stamouli, Reza Advani, Mattias Haukland, Petra Holmstrom, Noura Walai, Petra Edquist, Mia Brytting, Anna Risberg, Karin Tegmark-Wisell |
| EPI_ISL_913334, EPI_ISL_913335, EPI_ISL_913336                                                                                                                                                                                                                                                                                                                                                                                                                                                                                                                                                 | Klinisk Mikrobiologi                                                   | The Public Health Agency of Sweden                                             | Anna-Malin Linde, Maria Lind Karlberg, Carlo Berg, Oskar Karlsson Lindsjo, Sofia Stamouli, Reza Advani, Mattias Haukland, Petra Holmstrom, Noura Walai, Petra Edquist, Mia Brytting, Anna Risberg, Karin Tegmark-Wisell |
| EPI_ISL_913337, EPI_ISL_913338                                                                                                                                                                                                                                                                                                                                                                                                                                                                                                                                                                 | Unilabs AB Skovde                                                      | The Public Health Agency of Sweden                                             | Anna-Malin Linde, Maria Lind Karlberg, Carlo Berg, Oskar Karlsson Lindsjo, Sofia Stamouli, Reza Advani, Mattias Haukland, Petra Holmstrom, Noura Walai, Petra Edquist, Mia Brytting, Anna Risberg, Karin Tegmark-Wisell |
| EPI_ISL_913370                                                                                                                                                                                                                                                                                                                                                                                                                                                                                                                                                                                 | Klinisk Mikrobiologi                                                   | The Public Health Agency of Sweden                                             | Anna-Malin Linde, Maria Lind Karlberg, Carlo Berg, Oskar Karlsson Lindsjo, Sofia Stamouli, Reza Advani, Mattias Haukland, Petra Holmstrom, Noura Walai, Petra Edquist, Mia Brytting, Anna Risberg, Karin Tegmark-Wisell |
| EPI_ISL_913372, EPI_ISL_913373                                                                                                                                                                                                                                                                                                                                                                                                                                                                                                                                                                 | Klinisk mikrobiologi                                                   | The Public Health Agency of Sweden                                             | Anna-Malin Linde, Maria Lind Karlberg, Carlo Berg, Oskar Karlsson Lindsjo, Sofia Stamouli, Reza Advani, Mattias Haukland, Petra Holmstrom, Noura Walai, Petra Edquist, Mia Brytting, Anna Risberg, Karin Tegmark-Wisell |
| EPI_ISL_913385, EPI_ISL_913386, EPI_ISL_913387, EPI_ISL_913388, EPI_ISL_913389, EPI_ISL_913390, EPI_ISL_913391, EPI_ISL_913392                                                                                                                                                                                                                                                                                                                                                                                                                                                                 | Dynamic Code AB                                                        | The Public Health Agency of Sweden                                             | Anna-Malin Linde, Maria Lind Karlberg, Carlo Berg, Oskar Karlsson Lindsjo, Sofia Stamouli, Reza Advani, Mattias Haukland, Petra Holmstrom, Noura Walai, Petra Edquist, Mia Brytting, Anna Risberg, Karin Tegmark-Wisell |
| EPI_ISL_913436, EPI_ISL_913440, EPI_ISL_913441, EPI_ISL_913442, EPI_ISL_913443, EPI_ISL_913444                                                                                                                                                                                                                                                                                                                                                                                                                                                                                                 | Institute for Infectious Diseases, University of Bern, Switzerland     | Institute for Infectious Diseases, University of Bern, Switzerland             | Michel C Koch, Christian Baumann, Miguel A Terrazos Miani, Cora Sägesser, Pascal Bittel, Stephen L Leib, Peter Keller, Franziska Suter-Riniker, Alban Ramette                                                           |
| EPI_ISL_913455                                                                                                                                                                                                                                                                                                                                                                                                                                                                                                                                                                                 | Unilabs AB Skovde                                                      | The Public Health Agency of Sweden                                             | Anna-Malin Linde, Maria Lind Karlberg, Carlo Berg, Oskar Karlsson Lindsjo, Sofia Stamouli, Reza Advani, Mattias Haukland, Petra Holmstrom, Noura Walai, Petra Edquist, Mia Brytting, Anna Risberg, Karin Tegmark-Wisell |
| EPI_ISL_913456                                                                                                                                                                                                                                                                                                                                                                                                                                                                                                                                                                                 | Synlab Medilab, Mikrobiologi                                           | The Public Health Agency of Sweden                                             | Anna-Malin Linde, Maria Lind Karlberg, Carlo Berg, Oskar Karlsson Lindsjo, Sofia Stamouli, Reza Advani, Mattias Haukland, Petra Holmstrom, Noura Walai, Petra Edquist, Mia Brytting, Anna Risberg, Karin Tegmark-Wisell |
| EPI_ISL_913457, EPI_ISL_913458                                                                                                                                                                                                                                                                                                                                                                                                                                                                                                                                                                 | Klinisk mikrobiologi                                                   | The Public Health Agency of Sweden                                             | Anna-Malin Linde, Maria Lind Karlberg, Carlo Berg, Oskar Karlsson Lindsjo, Sofia Stamouli, Reza Advani, Mattias Haukland, Petra Holmstrom, Noura Walai, Petra Edquist, Mia Brytting, Anna Risberg, Karin Tegmark-Wisell |
| EPI_ISL_913459                                                                                                                                                                                                                                                                                                                                                                                                                                                                                                                                                                                 | Dynamic Code AB                                                        | The Public Health Agency of Sweden                                             | Anna-Malin Linde, Maria Lind Karlberg, Carlo Berg, Oskar Karlsson Lindsjo, Sofia Stamouli, Reza Advani, Mattias Haukland, Petra Holmstrom, Noura Walai, Petra Edquist, Mia Brytting, Anna Risberg, Karin Tegmark-Wisell |
| EPI_ISL_913465, EPI_ISL_913469, EPI_ISL_913470, EPI_ISL_913490, EPI_ISL_913491, EPI_ISL_913492, EPI_ISL_913493                                                                                                                                                                                                                                                                                                                                                                                                                                                                                 | Klinisk mikrobiologi                                                   | The Public Health Agency of Sweden                                             | Anna-Malin Linde, Maria Lind Karlberg, Carlo Berg, Oskar Karlsson Lindsjo, Sofia Stamouli, Reza Advani, Mattias Haukland, Petra Holmstrom, Noura Walai, Petra Edquist, Mia Brytting, Anna Risberg, Karin Tegmark-Wisell |
| EPI_ISL_913496, EPI_ISL_913497, EPI_ISL_913499, EPI_ISL_913500, EPI_ISL_913501, EPI_ISL_913502, EPI_ISL_913503, EPI_ISL_913504, EPI_ISL_913506, EPI_ISL_913507, EPI_ISL_913508, EPI_ISL_913511, EPI_ISL_913512, EPI_ISL_913513                                                                                                                                                                                                                                                                                                                                                                 | see above                                                              | AZDelta                                                                        | Geert Martens; Dieter De Smet                                                                                                                                                                                           |
| EPI_ISL_913565, EPI_ISL_913570, EPI_ISL_913581, EPI_ISL_913584                                                                                                                                                                                                                                                                                                                                                                                                                                                                                                                                 | M Health Fairview                                                      | Minnesota Department of Health, Public Health Laboratory                       | Alexandra Lorentz, Jacob Garfin, Matt Plumb, and Xiong Wang                                                                                                                                                             |
| EPI_ISL_913595, EPI_ISL_913598, EPI_ISL_913604, EPI_ISL_913605                                                                                                                                                                                                                                                                                                                                                                                                                                                                                                                                 | AZDelta                                                                | AZDelta                                                                        | Geert Martens; Dieter De Smet                                                                                                                                                                                           |
| EPI_ISL_913711, EPI_ISL_913712, EPI_ISL_913713, EPI_ISL_913714, EPI_ISL_913715, EPI_ISL_913716, EPI_ISL_913717, EPI_ISL_913718, EPI_ISL_913719, EPI_ISL_913720                                                                                                                                                                                                                                                                                                                                                                                                                                 | Minnesota Department of Health, Public Health Laboratory               | Minnesota Department of Health, Public Health Laboratory                       | Alexandra Lorentz, Jacob Garfin, Matt Plumb, and Xiong Wang                                                                                                                                                             |
| EPI_ISL_913731, EPI_ISL_913732, EPI_ISL_913733, EPI_ISL_913734, EPI_ISL_913735, EPI_ISL_913736                                                                                                                                                                                                                                                                                                                                                                                                                                                                                                 | M Health Fairview                                                      | Minnesota Department of Health, Public Health Laboratory                       | Alexandra Lorentz, Jacob Garfin, Matt Plumb, and Xiong Wang                                                                                                                                                             |
| EPI_ISL_913748, EPI_ISL_913749, EPI_ISL_913750, EPI_ISL_913751, EPI_ISL_913752, EPI_ISL_913753, EPI_ISL_913754, EPI_ISL_913755, EPI_ISL_913756, EPI_ISL_913757, EPI_ISL_913758, EPI_ISL_913760, EPI_ISL_913761, EPI_ISL_913762, EPI_ISL_913763, EPI_ISL_913764, EPI_ISL_913765, EPI_ISL_913767, EPI_ISL_913768, EPI_ISL_913796, EPI_ISL_913797, EPI_ISL_913807, EPI_ISL_913809, EPI_ISL_913810, EPI_ISL_913812, EPI_ISL_913816, EPI_ISL_913819, EPI_ISL_913820, EPI_ISL_913826, EPI_ISL_913827, EPI_ISL_913864, EPI_ISL_913865, EPI_ISL_913868, EPI_ISL_913869, EPI_ISL_913875, EPI_ISL_913876 |                                                                        |                                                                                |                                                                                                                                                                                                                         |

|                                                                                                                                                                                                                                                                                                                                                                                                                                                                                                                                                                                                                                                                                                                                                                                                                                                                                                                                                                                                                                                                                                                                                                                                                                                                                                                                                                                                                                                                                                                                                                                                                                                                                                                                                                                                                                                                                |                                                                  |                                                                                     |                                                                                                                                                                                                                                                                                                   |
|--------------------------------------------------------------------------------------------------------------------------------------------------------------------------------------------------------------------------------------------------------------------------------------------------------------------------------------------------------------------------------------------------------------------------------------------------------------------------------------------------------------------------------------------------------------------------------------------------------------------------------------------------------------------------------------------------------------------------------------------------------------------------------------------------------------------------------------------------------------------------------------------------------------------------------------------------------------------------------------------------------------------------------------------------------------------------------------------------------------------------------------------------------------------------------------------------------------------------------------------------------------------------------------------------------------------------------------------------------------------------------------------------------------------------------------------------------------------------------------------------------------------------------------------------------------------------------------------------------------------------------------------------------------------------------------------------------------------------------------------------------------------------------------------------------------------------------------------------------------------------------|------------------------------------------------------------------|-------------------------------------------------------------------------------------|---------------------------------------------------------------------------------------------------------------------------------------------------------------------------------------------------------------------------------------------------------------------------------------------------|
| see above                                                                                                                                                                                                                                                                                                                                                                                                                                                                                                                                                                                                                                                                                                                                                                                                                                                                                                                                                                                                                                                                                                                                                                                                                                                                                                                                                                                                                                                                                                                                                                                                                                                                                                                                                                                                                                                                      | KU Leuven, Rega Institute, Clinical and Epidemiological Virology | KU Leuven, Rega Institute, Clinical and Epidemiological Virology                    | Tony Wawina-Bokalanga, Bert Vanmechelen, Joan Marti-Carerras, Piet Maes                                                                                                                                                                                                                           |
| EPI_ISL_914638                                                                                                                                                                                                                                                                                                                                                                                                                                                                                                                                                                                                                                                                                                                                                                                                                                                                                                                                                                                                                                                                                                                                                                                                                                                                                                                                                                                                                                                                                                                                                                                                                                                                                                                                                                                                                                                                 | Santa Clara County Public Health Laboratory                      | Santa Clara County Public Health Laboratory                                         | Santa Clara County Public Health Department                                                                                                                                                                                                                                                       |
| EPI_ISL_914702, EPI_ISL_914704, EPI_ISL_914705, EPI_ISL_914706, EPI_ISL_914707, EPI_ISL_914709, EPI_ISL_914711, EPI_ISL_914712, EPI_ISL_914713, EPI_ISL_914716, EPI_ISL_914717, EPI_ISL_914718, EPI_ISL_914719, EPI_ISL_914720, EPI_ISL_914721, EPI_ISL_914723                                                                                                                                                                                                                                                                                                                                                                                                                                                                                                                                                                                                                                                                                                                                                                                                                                                                                                                                                                                                                                                                                                                                                                                                                                                                                                                                                                                                                                                                                                                                                                                                                 |                                                                  |                                                                                     |                                                                                                                                                                                                                                                                                                   |
| see above                                                                                                                                                                                                                                                                                                                                                                                                                                                                                                                                                                                                                                                                                                                                                                                                                                                                                                                                                                                                                                                                                                                                                                                                                                                                                                                                                                                                                                                                                                                                                                                                                                                                                                                                                                                                                                                                      | Maryland Public Health Laboratory (MD PHL)                       | Maryland Public Health Laboratory (MD PHL)                                          | Maryland Department of Health Laboratories Administration                                                                                                                                                                                                                                         |
| EPI_ISL_914815, EPI_ISL_914816, EPI_ISL_914818                                                                                                                                                                                                                                                                                                                                                                                                                                                                                                                                                                                                                                                                                                                                                                                                                                                                                                                                                                                                                                                                                                                                                                                                                                                                                                                                                                                                                                                                                                                                                                                                                                                                                                                                                                                                                                 | HOSPITAL DE NIÑOS DR. CARLOS SAENZ HERRERA                       | Incienza, Instituto Costarricense de Investigación y Enseñanza en Nutrición y Salud | Francisco Duarte, Hebleen Porras, Claudio Soto-Garita, Estela Cordero, Adriana Godínez, Melany Calderón & Cristian Pérez-Corrales                                                                                                                                                                 |
| EPI_ISL_914820                                                                                                                                                                                                                                                                                                                                                                                                                                                                                                                                                                                                                                                                                                                                                                                                                                                                                                                                                                                                                                                                                                                                                                                                                                                                                                                                                                                                                                                                                                                                                                                                                                                                                                                                                                                                                                                                 | AREA DE SALUD SAN JUAN-SAN DIEGO-CONCEPCION 2                    | Incienza, Instituto Costarricense de Investigación y Enseñanza en Nutrición y Salud | Francisco Duarte, Hebleen Porras, Claudio Soto-Garita, Estela Cordero, Adriana Godínez, Melany Calderón & Mariel López                                                                                                                                                                            |
| EPI_ISL_914823                                                                                                                                                                                                                                                                                                                                                                                                                                                                                                                                                                                                                                                                                                                                                                                                                                                                                                                                                                                                                                                                                                                                                                                                                                                                                                                                                                                                                                                                                                                                                                                                                                                                                                                                                                                                                                                                 | HOSPITAL DR. ENRIQUE BALTODANO BRICEÑO                           | Incienza, Instituto Costarricense de Investigación y Enseñanza en Nutrición y Salud | Francisco Duarte, Hebleen Porras, Claudio Soto-Garita, Estela Cordero, Adriana Godínez, Melany Calderón & Mariel López                                                                                                                                                                            |
| EPI_ISL_914825                                                                                                                                                                                                                                                                                                                                                                                                                                                                                                                                                                                                                                                                                                                                                                                                                                                                                                                                                                                                                                                                                                                                                                                                                                                                                                                                                                                                                                                                                                                                                                                                                                                                                                                                                                                                                                                                 | AREA DE SALUD MORAVIA                                            | Incienza, Instituto Costarricense de Investigación y Enseñanza en Nutrición y Salud | Francisco Duarte, Hebleen Porras, Claudio Soto-Garita, Estela Cordero, Adriana Godínez, Melany Calderón & Mariel López                                                                                                                                                                            |
| EPI_ISL_914829                                                                                                                                                                                                                                                                                                                                                                                                                                                                                                                                                                                                                                                                                                                                                                                                                                                                                                                                                                                                                                                                                                                                                                                                                                                                                                                                                                                                                                                                                                                                                                                                                                                                                                                                                                                                                                                                 | TAMIAJE COMUNITARIO - PASO CANOAS                                | Incienza, Instituto Costarricense de Investigación y Enseñanza en Nutrición y Salud | Francisco Duarte, Hebleen Porras, Claudio Soto-Garita, Estela Cordero, Adriana Godínez, Melany Calderón & Mariel López                                                                                                                                                                            |
| EPI_ISL_914832                                                                                                                                                                                                                                                                                                                                                                                                                                                                                                                                                                                                                                                                                                                                                                                                                                                                                                                                                                                                                                                                                                                                                                                                                                                                                                                                                                                                                                                                                                                                                                                                                                                                                                                                                                                                                                                                 | LABORATORIO CLINICO LABIN                                        | Incienza, Instituto Costarricense de Investigación y Enseñanza en Nutrición y Salud | Francisco Duarte, Hebleen Porras, Claudio Soto-Garita, Estela Cordero, Adriana Godínez, Melany Calderón & Pei Ling Chan Ma                                                                                                                                                                        |
| EPI_ISL_914835                                                                                                                                                                                                                                                                                                                                                                                                                                                                                                                                                                                                                                                                                                                                                                                                                                                                                                                                                                                                                                                                                                                                                                                                                                                                                                                                                                                                                                                                                                                                                                                                                                                                                                                                                                                                                                                                 | AREA DE SALUD PARAISO-CERVANTES                                  | Incienza, Instituto Costarricense de Investigación y Enseñanza en Nutrición y Salud | Francisco Duarte, Hebleen Porras, Claudio Soto-Garita, Estela Cordero, Adriana Godínez, Melany Calderón & Mariel López                                                                                                                                                                            |
| EPI_ISL_914836                                                                                                                                                                                                                                                                                                                                                                                                                                                                                                                                                                                                                                                                                                                                                                                                                                                                                                                                                                                                                                                                                                                                                                                                                                                                                                                                                                                                                                                                                                                                                                                                                                                                                                                                                                                                                                                                 | HOSPITAL MEXICO                                                  | Incienza, Instituto Costarricense de Investigación y Enseñanza en Nutrición y Salud | Francisco Duarte, Hebleen Porras, Claudio Soto-Garita, Estela Cordero, Adriana Godínez, Melany Calderón & Mariel López                                                                                                                                                                            |
| EPI_ISL_914837, EPI_ISL_914838, EPI_ISL_914839                                                                                                                                                                                                                                                                                                                                                                                                                                                                                                                                                                                                                                                                                                                                                                                                                                                                                                                                                                                                                                                                                                                                                                                                                                                                                                                                                                                                                                                                                                                                                                                                                                                                                                                                                                                                                                 | HOSPITAL MEXICO                                                  | Incienza, Instituto Costarricense de Investigación y Enseñanza en Nutrición y Salud | Francisco Duarte, Hebleen Porras, Claudio Soto-Garita, Estela Cordero, Adriana Godínez, Melany Calderón & Teresita Somogyi                                                                                                                                                                        |
| EPI_ISL_914890, EPI_ISL_914893, EPI_ISL_914895, EPI_ISL_914897, EPI_ISL_914900, EPI_ISL_914902, EPI_ISL_914904, EPI_ISL_914905, EPI_ISL_914906, EPI_ISL_914911, EPI_ISL_914914, EPI_ISL_914915, EPI_ISL_914918, EPI_ISL_914919, EPI_ISL_914928, EPI_ISL_914930, EPI_ISL_914932, EPI_ISL_914935, EPI_ISL_914936, EPI_ISL_914938, EPI_ISL_914946, EPI_ISL_914948, EPI_ISL_914952, EPI_ISL_914954, EPI_ISL_914956, EPI_ISL_914959, EPI_ISL_914962, EPI_ISL_914963, EPI_ISL_914965, EPI_ISL_914967, EPI_ISL_914969, EPI_ISL_915193, EPI_ISL_915194, EPI_ISL_915196, EPI_ISL_915199, EPI_ISL_915201, EPI_ISL_915203, EPI_ISL_915207, EPI_ISL_915211, EPI_ISL_915212, EPI_ISL_915214, EPI_ISL_915215, EPI_ISL_915216, EPI_ISL_915217, EPI_ISL_915218, EPI_ISL_915219, EPI_ISL_915224, EPI_ISL_915226, EPI_ISL_915227, EPI_ISL_915228, EPI_ISL_915229, EPI_ISL_915233, EPI_ISL_915234, EPI_ISL_915240, EPI_ISL_915242, EPI_ISL_915243, EPI_ISL_915245, EPI_ISL_915248, EPI_ISL_915250, EPI_ISL_915251, EPI_ISL_915252, EPI_ISL_915253, EPI_ISL_915255, EPI_ISL_915256, EPI_ISL_915257, EPI_ISL_915258, EPI_ISL_915259, EPI_ISL_915261, EPI_ISL_915263, EPI_ISL_915268, EPI_ISL_915271, EPI_ISL_915272, EPI_ISL_915273, EPI_ISL_915274, EPI_ISL_915277, EPI_ISL_915280, EPI_ISL_915282, EPI_ISL_915296, EPI_ISL_915298, EPI_ISL_915299, EPI_ISL_915302, EPI_ISL_915303, EPI_ISL_915305, EPI_ISL_915306, EPI_ISL_915309, EPI_ISL_915310, EPI_ISL_915311, EPI_ISL_915312, EPI_ISL_915313, EPI_ISL_915314, EPI_ISL_915316, EPI_ISL_915317, EPI_ISL_915319, EPI_ISL_915320, EPI_ISL_915321, EPI_ISL_915322, EPI_ISL_915324, EPI_ISL_915327, EPI_ISL_915328, EPI_ISL_915329, EPI_ISL_915332, EPI_ISL_915337, EPI_ISL_915338, EPI_ISL_915340, EPI_ISL_915342, EPI_ISL_915346, EPI_ISL_915347, EPI_ISL_915348, EPI_ISL_915349, EPI_ISL_915350, EPI_ISL_915351, EPI_ISL_915352, EPI_ISL_915354 |                                                                  |                                                                                     |                                                                                                                                                                                                                                                                                                   |
| see above                                                                                                                                                                                                                                                                                                                                                                                                                                                                                                                                                                                                                                                                                                                                                                                                                                                                                                                                                                                                                                                                                                                                                                                                                                                                                                                                                                                                                                                                                                                                                                                                                                                                                                                                                                                                                                                                      | Quest Diagnostics                                                | Quest Diagnostics                                                                   | Rosenthal,S.H., Gerasimova,A., Kagan,R.M., Anderson, B., Hua, M., Liu Y., Bernstein, L.E., Livingston, K.E., Perez, A., Shalhout, D.F., Shlyakhter, I.A., Owen, R., Tanpaiboon, P., Lacbawan, F.                                                                                                  |
| EPI_ISL_915422                                                                                                                                                                                                                                                                                                                                                                                                                                                                                                                                                                                                                                                                                                                                                                                                                                                                                                                                                                                                                                                                                                                                                                                                                                                                                                                                                                                                                                                                                                                                                                                                                                                                                                                                                                                                                                                                 | Bundeswehr Institute of Microbiology                             | Bundeswehr Institute of Microbiology                                                | Markus Antwerpen, Alexandra Rehn, Mathias Walter, Malena Bestehorn-Willmann, Sabine Zange, Enrico Georgi, Roman Wölfel                                                                                                                                                                            |
| EPI_ISL_915423                                                                                                                                                                                                                                                                                                                                                                                                                                                                                                                                                                                                                                                                                                                                                                                                                                                                                                                                                                                                                                                                                                                                                                                                                                                                                                                                                                                                                                                                                                                                                                                                                                                                                                                                                                                                                                                                 | München Klinik GmbH                                              | Bundeswehr Institute of Microbiology                                                | Markus Antwerpen, Hans-Ulrich Schmidt, Alexandra Rehn, Mathias Walter, Malena Bestehorn-Willmann, Sabine Zange, Enrico Georgi, Roman Wölfel                                                                                                                                                       |
| EPI_ISL_915427, EPI_ISL_915429                                                                                                                                                                                                                                                                                                                                                                                                                                                                                                                                                                                                                                                                                                                                                                                                                                                                                                                                                                                                                                                                                                                                                                                                                                                                                                                                                                                                                                                                                                                                                                                                                                                                                                                                                                                                                                                 | Bundeswehr Institute of Microbiology                             | Bundeswehr Institute of Microbiology                                                | Markus Antwerpen, Alexandra Rehn, Mathias Walter, Malena Bestehorn-Willmann, Sabine Zange, Enrico Georgi, Roman Wölfel                                                                                                                                                                            |
| EPI_ISL_915430, EPI_ISL_915431, EPI_ISL_915432, EPI_ISL_915433                                                                                                                                                                                                                                                                                                                                                                                                                                                                                                                                                                                                                                                                                                                                                                                                                                                                                                                                                                                                                                                                                                                                                                                                                                                                                                                                                                                                                                                                                                                                                                                                                                                                                                                                                                                                                 | Bundeswehrkrankenhaus Westerstede                                | Bundeswehr Institute of Microbiology                                                | Markus Antwerpen, Klaus Peter Ebert, Alexandra Rehn, Mathias Walter, Malena Bestehorn-Willmann, Sabine Zange, Enrico Georgi, Roman Wölfel                                                                                                                                                         |
| EPI_ISL_916183                                                                                                                                                                                                                                                                                                                                                                                                                                                                                                                                                                                                                                                                                                                                                                                                                                                                                                                                                                                                                                                                                                                                                                                                                                                                                                                                                                                                                                                                                                                                                                                                                                                                                                                                                                                                                                                                 | Lighthouse Lab in Cambridge                                      | Wellcome Sanger Institute for the COVID-19 Genomics UK (COG-UK) Consortium          | Rob Howes, The Lighthouse Lab in Cambridge and Alex Alderton, Roberto Amato, Sonia Goncalves, Ewan Harrison, David K. Jackson, Ian Johnston, Dominic Kwiatkowski, Cordelia Langford, John Sillitoe on behalf of the Wellcome Sanger Institute COVID-19 Surveillance Team                          |
| EPI_ISL_916184                                                                                                                                                                                                                                                                                                                                                                                                                                                                                                                                                                                                                                                                                                                                                                                                                                                                                                                                                                                                                                                                                                                                                                                                                                                                                                                                                                                                                                                                                                                                                                                                                                                                                                                                                                                                                                                                 | Lighthouse Lab in Alderley Park                                  | Wellcome Sanger Institute for the COVID-19 Genomics UK (COG-UK) Consortium          | Jacquelyn Wynn, Mairead Hyland, The Lighthouse Lab in Alderley Park and Alex Alderton, Roberto Amato, Sonia Goncalves, Ewan Harrison, David K. Jackson, Ian Johnston, Dominic Kwiatkowski, Cordelia Langford, John Sillitoe on behalf of the Wellcome Sanger Institute COVID-19 Surveillance Team |
| EPI_ISL_916185                                                                                                                                                                                                                                                                                                                                                                                                                                                                                                                                                                                                                                                                                                                                                                                                                                                                                                                                                                                                                                                                                                                                                                                                                                                                                                                                                                                                                                                                                                                                                                                                                                                                                                                                                                                                                                                                 | Lighthouse Lab in Cambridge                                      | Wellcome Sanger Institute for the COVID-19 Genomics UK (COG-UK) Consortium          | Rob Howes, The Lighthouse Lab in Cambridge and Alex Alderton, Roberto Amato, Sonia Goncalves, Ewan Harrison, David K. Jackson, Ian Johnston, Dominic Kwiatkowski, Cordelia Langford, John Sillitoe on behalf of the Wellcome Sanger Institute COVID-19 Surveillance Team                          |
| EPI_ISL_916186                                                                                                                                                                                                                                                                                                                                                                                                                                                                                                                                                                                                                                                                                                                                                                                                                                                                                                                                                                                                                                                                                                                                                                                                                                                                                                                                                                                                                                                                                                                                                                                                                                                                                                                                                                                                                                                                 | Lighthouse Lab in Alderley Park                                  | Wellcome Sanger Institute for the COVID-19 Genomics UK (COG-UK) Consortium          | Jacquelyn Wynn, Mairead Hyland, The Lighthouse Lab in Alderley Park and Alex Alderton, Roberto Amato, Sonia Goncalves, Ewan Harrison, David K. Jackson, Ian Johnston, Dominic Kwiatkowski, Cordelia Langford, John Sillitoe on behalf of the Wellcome Sanger Institute COVID-19 Surveillance Team |
| EPI_ISL_916187, EPI_ISL_916188, EPI_ISL_916190, EPI_ISL_916192, EPI_ISL_916193, EPI_ISL_916194, EPI_ISL_916196                                                                                                                                                                                                                                                                                                                                                                                                                                                                                                                                                                                                                                                                                                                                                                                                                                                                                                                                                                                                                                                                                                                                                                                                                                                                                                                                                                                                                                                                                                                                                                                                                                                                                                                                                                 | Lighthouse Lab in Cambridge                                      | Wellcome Sanger Institute for the COVID-19 Genomics UK (COG-UK) Consortium          | Rob Howes, The Lighthouse Lab in Cambridge and Alex Alderton, Roberto Amato, Sonia Goncalves, Ewan Harrison, David K. Jackson, Ian Johnston, Dominic Kwiatkowski, Cordelia Langford, John Sillitoe on behalf of the Wellcome Sanger Institute COVID-19 Surveillance Team                          |
| EPI_ISL_916197, EPI_ISL_916198, EPI_ISL_916199                                                                                                                                                                                                                                                                                                                                                                                                                                                                                                                                                                                                                                                                                                                                                                                                                                                                                                                                                                                                                                                                                                                                                                                                                                                                                                                                                                                                                                                                                                                                                                                                                                                                                                                                                                                                                                 | Lighthouse Lab in Alderley Park                                  | Wellcome Sanger Institute for the COVID-19 Genomics UK (COG-UK) Consortium          | Jacquelyn Wynn, Mairead Hyland, The Lighthouse Lab in Alderley Park and Alex Alderton, Roberto Amato, Sonia Goncalves, Ewan Harrison, David K. Jackson, Ian Johnston, Dominic Kwiatkowski, Cordelia Langford, John Sillitoe on behalf of the Wellcome Sanger Institute COVID-19 Surveillance Team |
| EPI_ISL_916200, EPI_ISL_916201, EPI_ISL_916202                                                                                                                                                                                                                                                                                                                                                                                                                                                                                                                                                                                                                                                                                                                                                                                                                                                                                                                                                                                                                                                                                                                                                                                                                                                                                                                                                                                                                                                                                                                                                                                                                                                                                                                                                                                                                                 | Lighthouse Lab in Cambridge                                      | Wellcome Sanger Institute for the COVID-19 Genomics UK (COG-UK) Consortium          | Rob Howes, The Lighthouse Lab in Cambridge and Alex Alderton, Roberto Amato, Sonia Goncalves, Ewan Harrison, David K. Jackson, Ian Johnston, Dominic Kwiatkowski, Cordelia Langford, John Sillitoe on behalf of the Wellcome Sanger Institute COVID-19 Surveillance Team                          |
| EPI_ISL_916204                                                                                                                                                                                                                                                                                                                                                                                                                                                                                                                                                                                                                                                                                                                                                                                                                                                                                                                                                                                                                                                                                                                                                                                                                                                                                                                                                                                                                                                                                                                                                                                                                                                                                                                                                                                                                                                                 | Lighthouse Lab in Alderley Park                                  | Wellcome Sanger Institute for the COVID-19 Genomics UK (COG-UK) Consortium          | Jacquelyn Wynn, Mairead Hyland, The Lighthouse Lab in Alderley Park and Alex Alderton, Roberto Amato, Sonia Goncalves, Ewan Harrison, David K. Jackson, Ian Johnston, Dominic Kwiatkowski, Cordelia Langford, John Sillitoe on behalf of the Wellcome Sanger Institute COVID-19 Surveillance Team |
| EPI_ISL_916205, EPI_ISL_916207, EPI_ISL_916209, EPI_ISL_916210, EPI_ISL_916211, EPI_ISL_916212, EPI_ISL_916213                                                                                                                                                                                                                                                                                                                                                                                                                                                                                                                                                                                                                                                                                                                                                                                                                                                                                                                                                                                                                                                                                                                                                                                                                                                                                                                                                                                                                                                                                                                                                                                                                                                                                                                                                                 | Lighthouse Lab in Cambridge                                      | Wellcome Sanger Institute for the COVID-19 Genomics UK (COG-UK) Consortium          | Rob Howes, The Lighthouse Lab in Cambridge and Alex Alderton, Roberto Amato, Sonia Goncalves, Ewan Harrison, David K. Jackson, Ian Johnston, Dominic Kwiatkowski, Cordelia Langford, John Sillitoe on behalf of the Wellcome Sanger Institute COVID-19 Surveillance Team                          |
| EPI_ISL_916215                                                                                                                                                                                                                                                                                                                                                                                                                                                                                                                                                                                                                                                                                                                                                                                                                                                                                                                                                                                                                                                                                                                                                                                                                                                                                                                                                                                                                                                                                                                                                                                                                                                                                                                                                                                                                                                                 | Lighthouse Lab in Alderley Park                                  | Wellcome Sanger Institute for the COVID-19 Genomics UK (COG-UK) Consortium          | Jacquelyn Wynn, Mairead Hyland, The Lighthouse Lab in Alderley Park and Alex Alderton, Roberto Amato, Sonia Goncalves, Ewan Harrison, David K. Jackson, Ian Johnston, Dominic Kwiatkowski, Cordelia Langford, John Sillitoe on behalf of the Wellcome Sanger Institute COVID-19 Surveillance Team |
| EPI_ISL_916216                                                                                                                                                                                                                                                                                                                                                                                                                                                                                                                                                                                                                                                                                                                                                                                                                                                                                                                                                                                                                                                                                                                                                                                                                                                                                                                                                                                                                                                                                                                                                                                                                                                                                                                                                                                                                                                                 | Lighthouse Lab in Cambridge                                      | Wellcome Sanger Institute for the COVID-19 Genomics UK (COG-UK) Consortium          | Rob Howes, The Lighthouse Lab in Cambridge and Alex Alderton, Roberto Amato, Sonia Goncalves, Ewan Harrison, David K. Jackson, Ian Johnston, Dominic Kwiatkowski, Cordelia Langford, John Sillitoe on behalf of the Wellcome Sanger Institute COVID-19 Surveillance Team                          |
| EPI_ISL_916217, EPI_ISL_916218, EPI_ISL_916220, EPI_ISL_916221                                                                                                                                                                                                                                                                                                                                                                                                                                                                                                                                                                                                                                                                                                                                                                                                                                                                                                                                                                                                                                                                                                                                                                                                                                                                                                                                                                                                                                                                                                                                                                                                                                                                                                                                                                                                                 | Lighthouse Lab in Alderley Park                                  | Wellcome Sanger Institute for the COVID-19 Genomics UK (COG-UK) Consortium          | Jacquelyn Wynn, Mairead Hyland, The Lighthouse Lab in Alderley Park and Alex Alderton, Roberto Amato, Sonia Goncalves, Ewan Harrison, David K. Jackson, Ian Johnston, Dominic Kwiatkowski, Cordelia Langford, John Sillitoe on behalf of the Wellcome Sanger Institute COVID-19 Surveillance Team |
| EPI_ISL_916222                                                                                                                                                                                                                                                                                                                                                                                                                                                                                                                                                                                                                                                                                                                                                                                                                                                                                                                                                                                                                                                                                                                                                                                                                                                                                                                                                                                                                                                                                                                                                                                                                                                                                                                                                                                                                                                                 | Lighthouse Lab in Cambridge                                      | Wellcome Sanger Institute for the COVID-19 Genomics UK (COG-UK) Consortium          | Rob Howes, The Lighthouse Lab in Cambridge and Alex Alderton, Roberto Amato, Sonia Goncalves, Ewan Harrison, David K. Jackson, Ian Johnston, Dominic Kwiatkowski, Cordelia Langford, John Sillitoe on behalf of the Wellcome Sanger Institute COVID-19 Surveillance Team                          |
| EPI_ISL_916223, EPI_ISL_916224                                                                                                                                                                                                                                                                                                                                                                                                                                                                                                                                                                                                                                                                                                                                                                                                                                                                                                                                                                                                                                                                                                                                                                                                                                                                                                                                                                                                                                                                                                                                                                                                                                                                                                                                                                                                                                                 | Lighthouse Lab in Alderley Park                                  | Wellcome Sanger Institute for the COVID-19 Genomics UK (COG-UK) Consortium          | Jacquelyn Wynn, Mairead Hyland, The Lighthouse Lab in Alderley Park and Alex Alderton, Roberto Amato, Sonia Goncalves, Ewan Harrison, David K. Jackson, Ian Johnston, Dominic Kwiatkowski, Cordelia Langford, John Sillitoe on behalf of the Wellcome Sanger Institute COVID-19 Surveillance Team |
| EPI_ISL_916225, EPI_ISL_916227, EPI_ISL_916228, EPI_ISL_916229                                                                                                                                                                                                                                                                                                                                                                                                                                                                                                                                                                                                                                                                                                                                                                                                                                                                                                                                                                                                                                                                                                                                                                                                                                                                                                                                                                                                                                                                                                                                                                                                                                                                                                                                                                                                                 | Lighthouse Lab in Cambridge                                      | Wellcome Sanger Institute for the COVID-19 Genomics UK (COG-UK) Consortium          | Rob Howes, The Lighthouse Lab in Cambridge and Alex Alderton, Roberto Amato, Sonia Goncalves, Ewan Harrison, David K. Jackson, Ian Johnston, Dominic Kwiatkowski, Cordelia Langford, John Sillitoe on behalf of the Wellcome Sanger Institute COVID-19 Surveillance Team                          |

[illegible]

[illegible]

[illegible]



[illegible]

[illegible]

[illegible]

[illegible]















[illegible]

[illegible]

[illegible]

[illegible]

[illegible]

[illegible]



|                                                                                                                                                                                                                                                                                                                                                                                                                                                                                                                                                                                                                                                                                                                                                                                                                                                                                                                                                                                                                                                                                                                                                                                                                                                                                                                                                                                                                                                                                                                                                                                                                                                                                                                                                                                                                                                                                                                                                                                                                                                                                                                                                                                                                                                                                                                                                                                                                                                                                                                                                                                                                                                                                                                                                                                                                                                                                                                                                                                                                                                |                                                                                                                                |                                                                                                                                |                                                                                                                                                                                                                                                                                                             |
|------------------------------------------------------------------------------------------------------------------------------------------------------------------------------------------------------------------------------------------------------------------------------------------------------------------------------------------------------------------------------------------------------------------------------------------------------------------------------------------------------------------------------------------------------------------------------------------------------------------------------------------------------------------------------------------------------------------------------------------------------------------------------------------------------------------------------------------------------------------------------------------------------------------------------------------------------------------------------------------------------------------------------------------------------------------------------------------------------------------------------------------------------------------------------------------------------------------------------------------------------------------------------------------------------------------------------------------------------------------------------------------------------------------------------------------------------------------------------------------------------------------------------------------------------------------------------------------------------------------------------------------------------------------------------------------------------------------------------------------------------------------------------------------------------------------------------------------------------------------------------------------------------------------------------------------------------------------------------------------------------------------------------------------------------------------------------------------------------------------------------------------------------------------------------------------------------------------------------------------------------------------------------------------------------------------------------------------------------------------------------------------------------------------------------------------------------------------------------------------------------------------------------------------------------------------------------------------------------------------------------------------------------------------------------------------------------------------------------------------------------------------------------------------------------------------------------------------------------------------------------------------------------------------------------------------------------------------------------------------------------------------------------------------------|--------------------------------------------------------------------------------------------------------------------------------|--------------------------------------------------------------------------------------------------------------------------------|-------------------------------------------------------------------------------------------------------------------------------------------------------------------------------------------------------------------------------------------------------------------------------------------------------------|
|                                                                                                                                                                                                                                                                                                                                                                                                                                                                                                                                                                                                                                                                                                                                                                                                                                                                                                                                                                                                                                                                                                                                                                                                                                                                                                                                                                                                                                                                                                                                                                                                                                                                                                                                                                                                                                                                                                                                                                                                                                                                                                                                                                                                                                                                                                                                                                                                                                                                                                                                                                                                                                                                                                                                                                                                                                                                                                                                                                                                                                                |                                                                                                                                | (COG-UK) Consortium                                                                                                            | Jackson, Ian Johnston, Dominic Kwiatkowski, Cordelia Langford, John Sillitoe on behalf of the Wellcome Sanger Institute COVID-19 Surveillance Team                                                                                                                                                          |
| EPI_ISL_933060, EPI_ISL_933061                                                                                                                                                                                                                                                                                                                                                                                                                                                                                                                                                                                                                                                                                                                                                                                                                                                                                                                                                                                                                                                                                                                                                                                                                                                                                                                                                                                                                                                                                                                                                                                                                                                                                                                                                                                                                                                                                                                                                                                                                                                                                                                                                                                                                                                                                                                                                                                                                                                                                                                                                                                                                                                                                                                                                                                                                                                                                                                                                                                                                 | Lighthouse Lab in Milton Keynes                                                                                                | Wellcome Sanger Institute for the COVID-19 Genomics UK (COG-UK) Consortium                                                     | The Lighthouse Lab in Milton Keynes and Alex Alderton, Roberto Amato, Sonia Goncalves, Ewan Harrison, David K. Jackson, Ian Johnston, Dominic Kwiatkowski, Cordelia Langford, John Sillitoe on behalf of the Wellcome Sanger Institute COVID-19 Surveillance Team                                           |
| EPI_ISL_933062                                                                                                                                                                                                                                                                                                                                                                                                                                                                                                                                                                                                                                                                                                                                                                                                                                                                                                                                                                                                                                                                                                                                                                                                                                                                                                                                                                                                                                                                                                                                                                                                                                                                                                                                                                                                                                                                                                                                                                                                                                                                                                                                                                                                                                                                                                                                                                                                                                                                                                                                                                                                                                                                                                                                                                                                                                                                                                                                                                                                                                 | Lighthouse Lab in Alderley Park                                                                                                | Wellcome Sanger Institute for the COVID-19 Genomics UK (COG-UK) Consortium                                                     | Jacquelyn Wynn, Mairead Hyland, The Lighthouse Lab in Alderley Park and Alex Alderton, Roberto Amato, Sonia Goncalves, Ewan Harrison, David K. Jackson, Ian Johnston, Dominic Kwiatkowski, Cordelia Langford, John Sillitoe on behalf of the Wellcome Sanger Institute COVID-19 Surveillance Team           |
| EPI_ISL_933063                                                                                                                                                                                                                                                                                                                                                                                                                                                                                                                                                                                                                                                                                                                                                                                                                                                                                                                                                                                                                                                                                                                                                                                                                                                                                                                                                                                                                                                                                                                                                                                                                                                                                                                                                                                                                                                                                                                                                                                                                                                                                                                                                                                                                                                                                                                                                                                                                                                                                                                                                                                                                                                                                                                                                                                                                                                                                                                                                                                                                                 | Lighthouse Lab in Milton Keynes                                                                                                | Wellcome Sanger Institute for the COVID-19 Genomics UK (COG-UK) Consortium                                                     | The Lighthouse Lab in Milton Keynes and Alex Alderton, Roberto Amato, Sonia Goncalves, Ewan Harrison, David K. Jackson, Ian Johnston, Dominic Kwiatkowski, Cordelia Langford, John Sillitoe on behalf of the Wellcome Sanger Institute COVID-19 Surveillance Team                                           |
| EPI_ISL_933064, EPI_ISL_933066                                                                                                                                                                                                                                                                                                                                                                                                                                                                                                                                                                                                                                                                                                                                                                                                                                                                                                                                                                                                                                                                                                                                                                                                                                                                                                                                                                                                                                                                                                                                                                                                                                                                                                                                                                                                                                                                                                                                                                                                                                                                                                                                                                                                                                                                                                                                                                                                                                                                                                                                                                                                                                                                                                                                                                                                                                                                                                                                                                                                                 | Lighthouse Lab in Alderley Park                                                                                                | Wellcome Sanger Institute for the COVID-19 Genomics UK (COG-UK) Consortium                                                     | Jacquelyn Wynn, Mairead Hyland, The Lighthouse Lab in Alderley Park and Alex Alderton, Roberto Amato, Sonia Goncalves, Ewan Harrison, David K. Jackson, Ian Johnston, Dominic Kwiatkowski, Cordelia Langford, John Sillitoe on behalf of the Wellcome Sanger Institute COVID-19 Surveillance Team           |
| EPI_ISL_933067, EPI_ISL_933069, EPI_ISL_933073                                                                                                                                                                                                                                                                                                                                                                                                                                                                                                                                                                                                                                                                                                                                                                                                                                                                                                                                                                                                                                                                                                                                                                                                                                                                                                                                                                                                                                                                                                                                                                                                                                                                                                                                                                                                                                                                                                                                                                                                                                                                                                                                                                                                                                                                                                                                                                                                                                                                                                                                                                                                                                                                                                                                                                                                                                                                                                                                                                                                 | Lighthouse Lab in Glasgow                                                                                                      | Wellcome Sanger Institute for the COVID-19 Genomics UK (COG-UK) Consortium                                                     | Harper VanSteenhouse, Yumi Kasai, David Gray, Carol Clugston, Anna Dominiczak and Alex Alderton, Roberto Amato, Sonia Goncalves, Ewan Harrison, David K. Jackson, Ian Johnston, Dominic Kwiatkowski, Cordelia Langford, John Sillitoe on behalf of the Wellcome Sanger Institute COVID-19 Surveillance Team |
| EPI_ISL_933075, EPI_ISL_933076, EPI_ISL_933077                                                                                                                                                                                                                                                                                                                                                                                                                                                                                                                                                                                                                                                                                                                                                                                                                                                                                                                                                                                                                                                                                                                                                                                                                                                                                                                                                                                                                                                                                                                                                                                                                                                                                                                                                                                                                                                                                                                                                                                                                                                                                                                                                                                                                                                                                                                                                                                                                                                                                                                                                                                                                                                                                                                                                                                                                                                                                                                                                                                                 | Lighthouse Lab in Milton Keynes                                                                                                | Wellcome Sanger Institute for the COVID-19 Genomics UK (COG-UK) Consortium                                                     | The Lighthouse Lab in Milton Keynes and Alex Alderton, Roberto Amato, Sonia Goncalves, Ewan Harrison, David K. Jackson, Ian Johnston, Dominic Kwiatkowski, Cordelia Langford, John Sillitoe on behalf of the Wellcome Sanger Institute COVID-19 Surveillance Team                                           |
| EPI_ISL_933084                                                                                                                                                                                                                                                                                                                                                                                                                                                                                                                                                                                                                                                                                                                                                                                                                                                                                                                                                                                                                                                                                                                                                                                                                                                                                                                                                                                                                                                                                                                                                                                                                                                                                                                                                                                                                                                                                                                                                                                                                                                                                                                                                                                                                                                                                                                                                                                                                                                                                                                                                                                                                                                                                                                                                                                                                                                                                                                                                                                                                                 | Lighthouse Lab in Alderley Park                                                                                                | Wellcome Sanger Institute for the COVID-19 Genomics UK (COG-UK) Consortium                                                     | Jacquelyn Wynn, Mairead Hyland, The Lighthouse Lab in Alderley Park and Alex Alderton, Roberto Amato, Sonia Goncalves, Ewan Harrison, David K. Jackson, Ian Johnston, Dominic Kwiatkowski, Cordelia Langford, John Sillitoe on behalf of the Wellcome Sanger Institute COVID-19 Surveillance Team           |
| EPI_ISL_933085, EPI_ISL_933088                                                                                                                                                                                                                                                                                                                                                                                                                                                                                                                                                                                                                                                                                                                                                                                                                                                                                                                                                                                                                                                                                                                                                                                                                                                                                                                                                                                                                                                                                                                                                                                                                                                                                                                                                                                                                                                                                                                                                                                                                                                                                                                                                                                                                                                                                                                                                                                                                                                                                                                                                                                                                                                                                                                                                                                                                                                                                                                                                                                                                 | Lighthouse Lab in Milton Keynes                                                                                                | Wellcome Sanger Institute for the COVID-19 Genomics UK (COG-UK) Consortium                                                     | The Lighthouse Lab in Milton Keynes and Alex Alderton, Roberto Amato, Sonia Goncalves, Ewan Harrison, David K. Jackson, Ian Johnston, Dominic Kwiatkowski, Cordelia Langford, John Sillitoe on behalf of the Wellcome Sanger Institute COVID-19 Surveillance Team                                           |
| EPI_ISL_933090, EPI_ISL_933092, EPI_ISL_933094                                                                                                                                                                                                                                                                                                                                                                                                                                                                                                                                                                                                                                                                                                                                                                                                                                                                                                                                                                                                                                                                                                                                                                                                                                                                                                                                                                                                                                                                                                                                                                                                                                                                                                                                                                                                                                                                                                                                                                                                                                                                                                                                                                                                                                                                                                                                                                                                                                                                                                                                                                                                                                                                                                                                                                                                                                                                                                                                                                                                 | Lighthouse Lab in Alderley Park                                                                                                | Wellcome Sanger Institute for the COVID-19 Genomics UK (COG-UK) Consortium                                                     | Jacquelyn Wynn, Mairead Hyland, The Lighthouse Lab in Alderley Park and Alex Alderton, Roberto Amato, Sonia Goncalves, Ewan Harrison, David K. Jackson, Ian Johnston, Dominic Kwiatkowski, Cordelia Langford, John Sillitoe on behalf of the Wellcome Sanger Institute COVID-19 Surveillance Team           |
| EPI_ISL_933099                                                                                                                                                                                                                                                                                                                                                                                                                                                                                                                                                                                                                                                                                                                                                                                                                                                                                                                                                                                                                                                                                                                                                                                                                                                                                                                                                                                                                                                                                                                                                                                                                                                                                                                                                                                                                                                                                                                                                                                                                                                                                                                                                                                                                                                                                                                                                                                                                                                                                                                                                                                                                                                                                                                                                                                                                                                                                                                                                                                                                                 | Lighthouse Lab in Glasgow                                                                                                      | Wellcome Sanger Institute for the COVID-19 Genomics UK (COG-UK) Consortium                                                     | Harper VanSteenhouse, Yumi Kasai, David Gray, Carol Clugston, Anna Dominiczak and Alex Alderton, Roberto Amato, Sonia Goncalves, Ewan Harrison, David K. Jackson, Ian Johnston, Dominic Kwiatkowski, Cordelia Langford, John Sillitoe on behalf of the Wellcome Sanger Institute COVID-19 Surveillance Team |
| EPI_ISL_933101                                                                                                                                                                                                                                                                                                                                                                                                                                                                                                                                                                                                                                                                                                                                                                                                                                                                                                                                                                                                                                                                                                                                                                                                                                                                                                                                                                                                                                                                                                                                                                                                                                                                                                                                                                                                                                                                                                                                                                                                                                                                                                                                                                                                                                                                                                                                                                                                                                                                                                                                                                                                                                                                                                                                                                                                                                                                                                                                                                                                                                 | Lighthouse Lab in Milton Keynes                                                                                                | Wellcome Sanger Institute for the COVID-19 Genomics UK (COG-UK) Consortium                                                     | The Lighthouse Lab in Milton Keynes and Alex Alderton, Roberto Amato, Sonia Goncalves, Ewan Harrison, David K. Jackson, Ian Johnston, Dominic Kwiatkowski, Cordelia Langford, John Sillitoe on behalf of the Wellcome Sanger Institute COVID-19 Surveillance Team                                           |
| EPI_ISL_933102, EPI_ISL_933104, EPI_ISL_933105, EPI_ISL_933106                                                                                                                                                                                                                                                                                                                                                                                                                                                                                                                                                                                                                                                                                                                                                                                                                                                                                                                                                                                                                                                                                                                                                                                                                                                                                                                                                                                                                                                                                                                                                                                                                                                                                                                                                                                                                                                                                                                                                                                                                                                                                                                                                                                                                                                                                                                                                                                                                                                                                                                                                                                                                                                                                                                                                                                                                                                                                                                                                                                 | Lighthouse Lab in Alderley Park                                                                                                | Wellcome Sanger Institute for the COVID-19 Genomics UK (COG-UK) Consortium                                                     | Jacquelyn Wynn, Mairead Hyland, The Lighthouse Lab in Alderley Park and Alex Alderton, Roberto Amato, Sonia Goncalves, Ewan Harrison, David K. Jackson, Ian Johnston, Dominic Kwiatkowski, Cordelia Langford, John Sillitoe on behalf of the Wellcome Sanger Institute COVID-19 Surveillance Team           |
| EPI_ISL_933108                                                                                                                                                                                                                                                                                                                                                                                                                                                                                                                                                                                                                                                                                                                                                                                                                                                                                                                                                                                                                                                                                                                                                                                                                                                                                                                                                                                                                                                                                                                                                                                                                                                                                                                                                                                                                                                                                                                                                                                                                                                                                                                                                                                                                                                                                                                                                                                                                                                                                                                                                                                                                                                                                                                                                                                                                                                                                                                                                                                                                                 | Lighthouse Lab in Milton Keynes                                                                                                | Wellcome Sanger Institute for the COVID-19 Genomics UK (COG-UK) Consortium                                                     | The Lighthouse Lab in Milton Keynes and Alex Alderton, Roberto Amato, Sonia Goncalves, Ewan Harrison, David K. Jackson, Ian Johnston, Dominic Kwiatkowski, Cordelia Langford, John Sillitoe on behalf of the Wellcome Sanger Institute COVID-19 Surveillance Team                                           |
| EPI_ISL_933109, EPI_ISL_933110                                                                                                                                                                                                                                                                                                                                                                                                                                                                                                                                                                                                                                                                                                                                                                                                                                                                                                                                                                                                                                                                                                                                                                                                                                                                                                                                                                                                                                                                                                                                                                                                                                                                                                                                                                                                                                                                                                                                                                                                                                                                                                                                                                                                                                                                                                                                                                                                                                                                                                                                                                                                                                                                                                                                                                                                                                                                                                                                                                                                                 | Lighthouse Lab in Glasgow                                                                                                      | Wellcome Sanger Institute for the COVID-19 Genomics UK (COG-UK) Consortium                                                     | Harper VanSteenhouse, Yumi Kasai, David Gray, Carol Clugston, Anna Dominiczak and Alex Alderton, Roberto Amato, Sonia Goncalves, Ewan Harrison, David K. Jackson, Ian Johnston, Dominic Kwiatkowski, Cordelia Langford, John Sillitoe on behalf of the Wellcome Sanger Institute COVID-19 Surveillance Team |
| EPI_ISL_933112                                                                                                                                                                                                                                                                                                                                                                                                                                                                                                                                                                                                                                                                                                                                                                                                                                                                                                                                                                                                                                                                                                                                                                                                                                                                                                                                                                                                                                                                                                                                                                                                                                                                                                                                                                                                                                                                                                                                                                                                                                                                                                                                                                                                                                                                                                                                                                                                                                                                                                                                                                                                                                                                                                                                                                                                                                                                                                                                                                                                                                 | Lighthouse Lab in Alderley Park                                                                                                | Wellcome Sanger Institute for the COVID-19 Genomics UK (COG-UK) Consortium                                                     | Jacquelyn Wynn, Mairead Hyland, The Lighthouse Lab in Alderley Park and Alex Alderton, Roberto Amato, Sonia Goncalves, Ewan Harrison, David K. Jackson, Ian Johnston, Dominic Kwiatkowski, Cordelia Langford, John Sillitoe on behalf of the Wellcome Sanger Institute COVID-19 Surveillance Team           |
| EPI_ISL_933114, EPI_ISL_933116, EPI_ISL_933118, EPI_ISL_933120, EPI_ISL_933122, EPI_ISL_933124, EPI_ISL_933125, EPI_ISL_933126, EPI_ISL_933130, EPI_ISL_933133, EPI_ISL_933134, EPI_ISL_933135, EPI_ISL_933136, EPI_ISL_933137, EPI_ISL_933143, EPI_ISL_933144, EPI_ISL_933145, EPI_ISL_933148, EPI_ISL_933149, EPI_ISL_933151, EPI_ISL_933152, EPI_ISL_933154, EPI_ISL_933160, EPI_ISL_933164, EPI_ISL_933165, EPI_ISL_933166, EPI_ISL_933168, EPI_ISL_933169, EPI_ISL_933170, EPI_ISL_933171, EPI_ISL_933172, EPI_ISL_933173, EPI_ISL_933174, EPI_ISL_933175, EPI_ISL_933176, EPI_ISL_933177, EPI_ISL_933180, EPI_ISL_933182, EPI_ISL_933184, EPI_ISL_933185, EPI_ISL_933186, EPI_ISL_933190, EPI_ISL_933191, EPI_ISL_933192, EPI_ISL_933193, EPI_ISL_933195, EPI_ISL_933197, EPI_ISL_933201, EPI_ISL_933202, EPI_ISL_933204, EPI_ISL_933205, EPI_ISL_933206, EPI_ISL_933210, EPI_ISL_933212, EPI_ISL_933213, EPI_ISL_933214, EPI_ISL_933216, EPI_ISL_933219, EPI_ISL_933221, EPI_ISL_933223, EPI_ISL_933225, EPI_ISL_933226, EPI_ISL_933227, EPI_ISL_933228, EPI_ISL_933230, EPI_ISL_933231, EPI_ISL_933234, EPI_ISL_933237, EPI_ISL_933239, EPI_ISL_933240, EPI_ISL_933241, EPI_ISL_933244, EPI_ISL_933246, EPI_ISL_933250, EPI_ISL_933252, EPI_ISL_933253, EPI_ISL_933255, EPI_ISL_933256, EPI_ISL_933257, EPI_ISL_933258, EPI_ISL_933259, EPI_ISL_933261, EPI_ISL_933262, EPI_ISL_933264, EPI_ISL_933265, EPI_ISL_933267, EPI_ISL_933268, EPI_ISL_933271, EPI_ISL_933273, EPI_ISL_933280, EPI_ISL_933282, EPI_ISL_933283, EPI_ISL_933285, EPI_ISL_933287, EPI_ISL_933289, EPI_ISL_933291, EPI_ISL_933293, EPI_ISL_933294, EPI_ISL_933296, EPI_ISL_933297, EPI_ISL_933298, EPI_ISL_933299, EPI_ISL_933300, EPI_ISL_933301, EPI_ISL_933302, EPI_ISL_933303, EPI_ISL_933307, EPI_ISL_933308, EPI_ISL_933309, EPI_ISL_933311, EPI_ISL_933312, EPI_ISL_933313, EPI_ISL_933314, EPI_ISL_933315, EPI_ISL_933317, EPI_ISL_933320, EPI_ISL_933321, EPI_ISL_933322, EPI_ISL_933323, EPI_ISL_933325, EPI_ISL_933326, EPI_ISL_933327, EPI_ISL_933329, EPI_ISL_933330, EPI_ISL_933331, EPI_ISL_933332, EPI_ISL_933334, EPI_ISL_933335, EPI_ISL_933336, EPI_ISL_933337, EPI_ISL_933338, EPI_ISL_933339, EPI_ISL_933340, EPI_ISL_933341, EPI_ISL_933343, EPI_ISL_933344, EPI_ISL_933348, EPI_ISL_933349, EPI_ISL_933351, EPI_ISL_933352, EPI_ISL_933354, EPI_ISL_933355, EPI_ISL_933357, EPI_ISL_933361, EPI_ISL_933362, EPI_ISL_933363, EPI_ISL_933364, EPI_ISL_933366, EPI_ISL_933367, EPI_ISL_933368, EPI_ISL_933371, EPI_ISL_933372, EPI_ISL_933373, EPI_ISL_933374, EPI_ISL_933376, EPI_ISL_933379, EPI_ISL_933380, EPI_ISL_933381, EPI_ISL_933382, EPI_ISL_933383, EPI_ISL_933385, EPI_ISL_933386, EPI_ISL_933387, EPI_ISL_933388, EPI_ISL_933389, EPI_ISL_933390, EPI_ISL_933393, EPI_ISL_933398, EPI_ISL_933400, EPI_ISL_933402, EPI_ISL_933405, EPI_ISL_933407, EPI_ISL_933410, EPI_ISL_933411, EPI_ISL_933412, EPI_ISL_933415, EPI_ISL_933416, EPI_ISL_933417, EPI_ISL_933419, EPI_ISL_933420, EPI_ISL_933421, EPI_ISL_933422, EPI_ISL_933424 |                                                                                                                                |                                                                                                                                |                                                                                                                                                                                                                                                                                                             |
| see above                                                                                                                                                                                                                                                                                                                                                                                                                                                                                                                                                                                                                                                                                                                                                                                                                                                                                                                                                                                                                                                                                                                                                                                                                                                                                                                                                                                                                                                                                                                                                                                                                                                                                                                                                                                                                                                                                                                                                                                                                                                                                                                                                                                                                                                                                                                                                                                                                                                                                                                                                                                                                                                                                                                                                                                                                                                                                                                                                                                                                                      | Lighthouse Lab in Cambridge                                                                                                    | Wellcome Sanger Institute for the COVID-19 Genomics UK (COG-UK) Consortium                                                     | Rob Howes, The Lighthouse Lab in Cambridge and Alex Alderton, Roberto Amato, Sonia Goncalves, Ewan Harrison, David K. Jackson, Ian Johnston, Dominic Kwiatkowski, Cordelia Langford, John Sillitoe on behalf of the Wellcome Sanger Institute COVID-19 Surveillance Team                                    |
| EPI_ISL_933735, EPI_ISL_933736, EPI_ISL_933737, EPI_ISL_933739, EPI_ISL_933742, EPI_ISL_933743, EPI_ISL_933745, EPI_ISL_933747, EPI_ISL_933749, EPI_ISL_933755, EPI_ISL_933759, EPI_ISL_933760, EPI_ISL_933761, EPI_ISL_933762, EPI_ISL_933763, EPI_ISL_933764                                                                                                                                                                                                                                                                                                                                                                                                                                                                                                                                                                                                                                                                                                                                                                                                                                                                                                                                                                                                                                                                                                                                                                                                                                                                                                                                                                                                                                                                                                                                                                                                                                                                                                                                                                                                                                                                                                                                                                                                                                                                                                                                                                                                                                                                                                                                                                                                                                                                                                                                                                                                                                                                                                                                                                                 |                                                                                                                                |                                                                                                                                |                                                                                                                                                                                                                                                                                                             |
| see above                                                                                                                                                                                                                                                                                                                                                                                                                                                                                                                                                                                                                                                                                                                                                                                                                                                                                                                                                                                                                                                                                                                                                                                                                                                                                                                                                                                                                                                                                                                                                                                                                                                                                                                                                                                                                                                                                                                                                                                                                                                                                                                                                                                                                                                                                                                                                                                                                                                                                                                                                                                                                                                                                                                                                                                                                                                                                                                                                                                                                                      | DPHL                                                                                                                           | Delaware Public Health Lab                                                                                                     | Gregory Hovan                                                                                                                                                                                                                                                                                               |
| EPI_ISL_933779                                                                                                                                                                                                                                                                                                                                                                                                                                                                                                                                                                                                                                                                                                                                                                                                                                                                                                                                                                                                                                                                                                                                                                                                                                                                                                                                                                                                                                                                                                                                                                                                                                                                                                                                                                                                                                                                                                                                                                                                                                                                                                                                                                                                                                                                                                                                                                                                                                                                                                                                                                                                                                                                                                                                                                                                                                                                                                                                                                                                                                 | Victorian Infectious Diseases Reference Laboratory (VIDRL)                                                                     | VIDRL and MDU-PHL                                                                                                              | Caly L., Seemann T., Sait, M.L., Druce J., Sherry, N.L.                                                                                                                                                                                                                                                     |
| EPI_ISL_934315                                                                                                                                                                                                                                                                                                                                                                                                                                                                                                                                                                                                                                                                                                                                                                                                                                                                                                                                                                                                                                                                                                                                                                                                                                                                                                                                                                                                                                                                                                                                                                                                                                                                                                                                                                                                                                                                                                                                                                                                                                                                                                                                                                                                                                                                                                                                                                                                                                                                                                                                                                                                                                                                                                                                                                                                                                                                                                                                                                                                                                 | Narhalsan Fjallbacka VC                                                                                                        | The Public Health Agency of Sweden                                                                                             | Anna-Malin Linde, Maria Lind Karlberg, Carlo Berg, Oskar Karlsson Lindsjo, Sofia Stamouli, Reza Advani, Mattias Haukland, Petra Holmstrom, Noura Walai, Petra Edquist, Mia Brytting, Anna Risberg, Karin Tegmark-Wisell                                                                                     |
| EPI_ISL_934345, EPI_ISL_934346                                                                                                                                                                                                                                                                                                                                                                                                                                                                                                                                                                                                                                                                                                                                                                                                                                                                                                                                                                                                                                                                                                                                                                                                                                                                                                                                                                                                                                                                                                                                                                                                                                                                                                                                                                                                                                                                                                                                                                                                                                                                                                                                                                                                                                                                                                                                                                                                                                                                                                                                                                                                                                                                                                                                                                                                                                                                                                                                                                                                                 | Klinisk mikrobiologi                                                                                                           | The Public Health Agency of Sweden                                                                                             | Anna-Malin Linde, Maria Lind Karlberg, Carlo Berg, Oskar Karlsson Lindsjo, Sofia Stamouli, Reza Advani, Mattias Haukland, Petra Holmstrom, Noura Walai, Petra Edquist, Mia Brytting, Anna Risberg, Karin Tegmark-Wisell                                                                                     |
| EPI_ISL_934366                                                                                                                                                                                                                                                                                                                                                                                                                                                                                                                                                                                                                                                                                                                                                                                                                                                                                                                                                                                                                                                                                                                                                                                                                                                                                                                                                                                                                                                                                                                                                                                                                                                                                                                                                                                                                                                                                                                                                                                                                                                                                                                                                                                                                                                                                                                                                                                                                                                                                                                                                                                                                                                                                                                                                                                                                                                                                                                                                                                                                                 | Synlab Medilab, Mikrobiologi                                                                                                   | The Public Health Agency of Sweden                                                                                             | Anna-Malin Linde, Maria Lind Karlberg, Carlo Berg, Oskar Karlsson Lindsjo, Sofia Stamouli, Reza Advani, Mattias Haukland, Petra Holmstrom, Noura Walai, Petra Edquist, Mia Brytting, Anna Risberg, Karin Tegmark-Wisell                                                                                     |
| EPI_ISL_934376, EPI_ISL_934378, EPI_ISL_934380, EPI_ISL_934381, EPI_ISL_934382, EPI_ISL_934383, EPI_ISL_934384                                                                                                                                                                                                                                                                                                                                                                                                                                                                                                                                                                                                                                                                                                                                                                                                                                                                                                                                                                                                                                                                                                                                                                                                                                                                                                                                                                                                                                                                                                                                                                                                                                                                                                                                                                                                                                                                                                                                                                                                                                                                                                                                                                                                                                                                                                                                                                                                                                                                                                                                                                                                                                                                                                                                                                                                                                                                                                                                 | Klinisk mikrobiologi                                                                                                           | The Public Health Agency of Sweden                                                                                             | Anna-Malin Linde, Maria Lind Karlberg, Carlo Berg, Oskar Karlsson Lindsjo, Sofia Stamouli, Reza Advani, Mattias Haukland, Petra Holmstrom, Noura Walai, Petra Edquist, Mia Brytting, Anna Risberg, Karin Tegmark-Wisell                                                                                     |
| EPI_ISL_934394                                                                                                                                                                                                                                                                                                                                                                                                                                                                                                                                                                                                                                                                                                                                                                                                                                                                                                                                                                                                                                                                                                                                                                                                                                                                                                                                                                                                                                                                                                                                                                                                                                                                                                                                                                                                                                                                                                                                                                                                                                                                                                                                                                                                                                                                                                                                                                                                                                                                                                                                                                                                                                                                                                                                                                                                                                                                                                                                                                                                                                 | Klinisk Mikrobiologi                                                                                                           | The Public Health Agency of Sweden                                                                                             | Anna-Malin Linde, Maria Lind Karlberg, Carlo Berg, Oskar Karlsson Lindsjo, Sofia Stamouli, Reza Advani, Mattias Haukland, Petra Holmstrom, Noura Walai, Petra Edquist, Mia Brytting, Anna Risberg, Karin Tegmark-Wisell                                                                                     |
| EPI_ISL_934397, EPI_ISL_934398, EPI_ISL_934399, EPI_ISL_934400, EPI_ISL_934401, EPI_ISL_934402                                                                                                                                                                                                                                                                                                                                                                                                                                                                                                                                                                                                                                                                                                                                                                                                                                                                                                                                                                                                                                                                                                                                                                                                                                                                                                                                                                                                                                                                                                                                                                                                                                                                                                                                                                                                                                                                                                                                                                                                                                                                                                                                                                                                                                                                                                                                                                                                                                                                                                                                                                                                                                                                                                                                                                                                                                                                                                                                                 | Synlab Medilab, Mikrobiologi                                                                                                   | The Public Health Agency of Sweden                                                                                             | Anna-Malin Linde, Maria Lind Karlberg, Carlo Berg, Oskar Karlsson Lindsjo, Sofia Stamouli, Reza Advani, Mattias Haukland, Petra Holmstrom, Noura Walai, Petra Edquist, Mia Brytting, Anna Risberg, Karin Tegmark-Wisell                                                                                     |
| EPI_ISL_934424                                                                                                                                                                                                                                                                                                                                                                                                                                                                                                                                                                                                                                                                                                                                                                                                                                                                                                                                                                                                                                                                                                                                                                                                                                                                                                                                                                                                                                                                                                                                                                                                                                                                                                                                                                                                                                                                                                                                                                                                                                                                                                                                                                                                                                                                                                                                                                                                                                                                                                                                                                                                                                                                                                                                                                                                                                                                                                                                                                                                                                 | Institute for Medical Research, Infectious Disease Research Centre, National Institutes of Health, Ministry of Health Malaysia | Institute for Medical Research, Infectious Disease Research Centre, National Institutes of Health, Ministry of Health Malaysia | Suppiah J, Kamel K, Azizan MA, Thayan R                                                                                                                                                                                                                                                                     |
| EPI_ISL_934452, EPI_ISL_934454, EPI_ISL_934457, EPI_ISL_934459, EPI_ISL_934465, EPI_ISL_934466, EPI_ISL_934467, EPI_ISL_934469, EPI_ISL_934470, EPI_ISL_934471, EPI_ISL_934472, EPI_ISL_934481, EPI_ISL_934482, EPI_ISL_934483, EPI_ISL_934485, EPI_ISL_934487, EPI_ISL_934490, EPI_ISL_934491, EPI_ISL_934492, EPI_ISL_934495, EPI_ISL_934539                                                                                                                                                                                                                                                                                                                                                                                                                                                                                                                                                                                                                                                                                                                                                                                                                                                                                                                                                                                                                                                                                                                                                                                                                                                                                                                                                                                                                                                                                                                                                                                                                                                                                                                                                                                                                                                                                                                                                                                                                                                                                                                                                                                                                                                                                                                                                                                                                                                                                                                                                                                                                                                                                                 |                                                                                                                                |                                                                                                                                |                                                                                                                                                                                                                                                                                                             |
| see above                                                                                                                                                                                                                                                                                                                                                                                                                                                                                                                                                                                                                                                                                                                                                                                                                                                                                                                                                                                                                                                                                                                                                                                                                                                                                                                                                                                                                                                                                                                                                                                                                                                                                                                                                                                                                                                                                                                                                                                                                                                                                                                                                                                                                                                                                                                                                                                                                                                                                                                                                                                                                                                                                                                                                                                                                                                                                                                                                                                                                                      | Austrian Agency for Health and Food Safety (AGES)                                                                              | Bergthaler laboratory, CeMM Research Center for Molecular Medicine of the Austrian Academy of Sciences                         | Lukas Endler, Anna Schedl, Thomas Penz, Benedikt Agerer, Maelle Le Moing, Michael Schuster, Bekir Erguner, Jan Laine, Martin Senekowitsch, Christoph Bock, Andreas Bergthaler                                                                                                                               |
| EPI_ISL_934548, EPI_ISL_934549, EPI_ISL_934550, EPI_ISL_934551, EPI_ISL_934555, EPI_ISL_934556, EPI_ISL_934557, EPI_ISL_934559, EPI_ISL_934560, EPI_ISL_934561, EPI_ISL_934562, EPI_ISL_934563, EPI_ISL_934564, EPI_ISL_934565, EPI_ISL_934566, EPI_ISL_934568                                                                                                                                                                                                                                                                                                                                                                                                                                                                                                                                                                                                                                                                                                                                                                                                                                                                                                                                                                                                                                                                                                                                                                                                                                                                                                                                                                                                                                                                                                                                                                                                                                                                                                                                                                                                                                                                                                                                                                                                                                                                                                                                                                                                                                                                                                                                                                                                                                                                                                                                                                                                                                                                                                                                                                                 |                                                                                                                                |                                                                                                                                |                                                                                                                                                                                                                                                                                                             |

|                                                                                                                                                                                                                                                                                                                                                                                                                                                                                                                                                                                                                                                                                                                                                                                                                                                                                                                                                                                                                                                                                                                                                                                                                                                                                                                                                                                                                                                                                                                                                                                                                                                                                                                                                                                                                                                |                                                                                                                                          |                                                                                                        |                                                                                                                                                                                 |
|------------------------------------------------------------------------------------------------------------------------------------------------------------------------------------------------------------------------------------------------------------------------------------------------------------------------------------------------------------------------------------------------------------------------------------------------------------------------------------------------------------------------------------------------------------------------------------------------------------------------------------------------------------------------------------------------------------------------------------------------------------------------------------------------------------------------------------------------------------------------------------------------------------------------------------------------------------------------------------------------------------------------------------------------------------------------------------------------------------------------------------------------------------------------------------------------------------------------------------------------------------------------------------------------------------------------------------------------------------------------------------------------------------------------------------------------------------------------------------------------------------------------------------------------------------------------------------------------------------------------------------------------------------------------------------------------------------------------------------------------------------------------------------------------------------------------------------------------|------------------------------------------------------------------------------------------------------------------------------------------|--------------------------------------------------------------------------------------------------------|---------------------------------------------------------------------------------------------------------------------------------------------------------------------------------|
| see above                                                                                                                                                                                                                                                                                                                                                                                                                                                                                                                                                                                                                                                                                                                                                                                                                                                                                                                                                                                                                                                                                                                                                                                                                                                                                                                                                                                                                                                                                                                                                                                                                                                                                                                                                                                                                                      | Department of Laboratory Medicine, Division of Clinical Virology, University of Medicine, Vienna                                         | Bergthaler laboratory, CeMM Research Center for Molecular Medicine of the Austrian Academy of Sciences | Lukas Endler, Anna Schedl, Thomas Penz, Benedikt Agerer, Maëlle Le Moing, Michael Schuster, Bekir Erguner, Jan Laine, Martin Senekowitsch, Christoph Bock, Andreas Bergthaler   |
| EPI_ISL_934593, EPI_ISL_934599, EPI_ISL_934600, EPI_ISL_934601, EPI_ISL_934602, EPI_ISL_934603, EPI_ISL_934605, EPI_ISL_934606, EPI_ISL_934607, EPI_ISL_934608, EPI_ISL_934612, EPI_ISL_934613, EPI_ISL_934620, EPI_ISL_934623, EPI_ISL_934624, EPI_ISL_934626, EPI_ISL_934627, EPI_ISL_934628, EPI_ISL_934629, EPI_ISL_934630, EPI_ISL_934631                                                                                                                                                                                                                                                                                                                                                                                                                                                                                                                                                                                                                                                                                                                                                                                                                                                                                                                                                                                                                                                                                                                                                                                                                                                                                                                                                                                                                                                                                                 |                                                                                                                                          |                                                                                                        |                                                                                                                                                                                 |
| see above                                                                                                                                                                                                                                                                                                                                                                                                                                                                                                                                                                                                                                                                                                                                                                                                                                                                                                                                                                                                                                                                                                                                                                                                                                                                                                                                                                                                                                                                                                                                                                                                                                                                                                                                                                                                                                      | Austrian Agency for Health and Food Safety (AGES)                                                                                        | Bergthaler laboratory, CeMM Research Center for Molecular Medicine of the Austrian Academy of Sciences | Lukas Endler, Anna Schedl, Thomas Penz, Benedikt Agerer, Maëlle Le Moing, Michael Schuster, Bekir Erguner, Jan Laine, Martin Senekowitsch, Christoph Bock, Andreas Bergthaler   |
| EPI_ISL_934652, EPI_ISL_934653, EPI_ISL_934654                                                                                                                                                                                                                                                                                                                                                                                                                                                                                                                                                                                                                                                                                                                                                                                                                                                                                                                                                                                                                                                                                                                                                                                                                                                                                                                                                                                                                                                                                                                                                                                                                                                                                                                                                                                                 | Klinikum Wels-Grieskirchen                                                                                                               | Bergthaler laboratory, CeMM Research Center for Molecular Medicine of the Austrian Academy of Sciences | Lukas Endler, Anna Schedl, Thomas Penz, Benedikt Agerer, Maëlle Le Moing, Michael Schuster, Bekir Erguner, Jan Laine, Martin Senekowitsch, Christoph Bock, Andreas Bergthaler   |
| EPI_ISL_934655, EPI_ISL_934659, EPI_ISL_934660, EPI_ISL_934661, EPI_ISL_934663, EPI_ISL_934664, EPI_ISL_934665, EPI_ISL_934666, EPI_ISL_934668, EPI_ISL_934669, EPI_ISL_934670, EPI_ISL_934672, EPI_ISL_934673, EPI_ISL_934674, EPI_ISL_934675, EPI_ISL_934676, EPI_ISL_934677, EPI_ISL_934678, EPI_ISL_934680, EPI_ISL_934681, EPI_ISL_934682, EPI_ISL_934683, EPI_ISL_934684, EPI_ISL_934685, EPI_ISL_934686, EPI_ISL_934687, EPI_ISL_934688, EPI_ISL_934690, EPI_ISL_934691, EPI_ISL_934692, EPI_ISL_934693, EPI_ISL_934694, EPI_ISL_934695                                                                                                                                                                                                                                                                                                                                                                                                                                                                                                                                                                                                                                                                                                                                                                                                                                                                                                                                                                                                                                                                                                                                                                                                                                                                                                 |                                                                                                                                          |                                                                                                        |                                                                                                                                                                                 |
| see above                                                                                                                                                                                                                                                                                                                                                                                                                                                                                                                                                                                                                                                                                                                                                                                                                                                                                                                                                                                                                                                                                                                                                                                                                                                                                                                                                                                                                                                                                                                                                                                                                                                                                                                                                                                                                                      | Department of Laboratory Medicine, Division of Clinical Virology, University of Medicine, Vienna                                         | Bergthaler laboratory, CeMM Research Center for Molecular Medicine of the Austrian Academy of Sciences | Lukas Endler, Anna Schedl, Thomas Penz, Benedikt Agerer, Maëlle Le Moing, Michael Schuster, Bekir Erguner, Jan Laine, Martin Senekowitsch, Christoph Bock, Andreas Bergthaler   |
| EPI_ISL_934971, EPI_ISL_934972                                                                                                                                                                                                                                                                                                                                                                                                                                                                                                                                                                                                                                                                                                                                                                                                                                                                                                                                                                                                                                                                                                                                                                                                                                                                                                                                                                                                                                                                                                                                                                                                                                                                                                                                                                                                                 | Thai Red Cross Emerging Infectious Diseases Health Science Centre, Chulalongkorn Hospital, Faculty of Medicine, Chulalongkorn University | Thai Red Cross Emerging Infectious Diseases Center and Faculty of Medicine, Chulalongkorn University   | Rome Buathong, Sopon lamsirithaworn, Sininat Petcharat, Yutthana Joyjinda, Weenassarin Ampoot, Apaporn Rodpan, Opass Putcharoen, Thiravat Hemachudha, Supaporn Wacharapluesadee |
| EPI_ISL_934994, EPI_ISL_935000, EPI_ISL_935001, EPI_ISL_935002, EPI_ISL_935003, EPI_ISL_935004, EPI_ISL_935005, EPI_ISL_935008, EPI_ISL_935009, EPI_ISL_935010, EPI_ISL_935011                                                                                                                                                                                                                                                                                                                                                                                                                                                                                                                                                                                                                                                                                                                                                                                                                                                                                                                                                                                                                                                                                                                                                                                                                                                                                                                                                                                                                                                                                                                                                                                                                                                                 |                                                                                                                                          |                                                                                                        |                                                                                                                                                                                 |
| see above                                                                                                                                                                                                                                                                                                                                                                                                                                                                                                                                                                                                                                                                                                                                                                                                                                                                                                                                                                                                                                                                                                                                                                                                                                                                                                                                                                                                                                                                                                                                                                                                                                                                                                                                                                                                                                      | ADMED Microbiologie                                                                                                                      | Genomics and Transcriptomics, Philip Morris International                                              | Reto Lienhard, Marie-Lise Tritten, Emmanuel Guedj, Nicolas Sierro, Rémi Dulize, David Bornand, Mehdi Auberson, Maxime Berthouzoz, Nikolai Ivanov, Manuel Peitsch                |
| EPI_ISL_935021                                                                                                                                                                                                                                                                                                                                                                                                                                                                                                                                                                                                                                                                                                                                                                                                                                                                                                                                                                                                                                                                                                                                                                                                                                                                                                                                                                                                                                                                                                                                                                                                                                                                                                                                                                                                                                 | Laboratory for Respiratory Viruses, Cantacuzino National Military-Medical Institute for Research and Development                         | Cantacuzino Institute Virology                                                                         | Luiza Ustea, Nicoleta Paraschiv, Mihaela Lazar                                                                                                                                  |
| EPI_ISL_935048, EPI_ISL_935049, EPI_ISL_935057, EPI_ISL_935059, EPI_ISL_935063, EPI_ISL_935064, EPI_ISL_935069, EPI_ISL_935073, EPI_ISL_935074, EPI_ISL_935075, EPI_ISL_935076, EPI_ISL_935077, EPI_ISL_935078, EPI_ISL_935079, EPI_ISL_935080, EPI_ISL_935081, EPI_ISL_935082, EPI_ISL_935083, EPI_ISL_935084, EPI_ISL_935085, EPI_ISL_935086, EPI_ISL_935087, EPI_ISL_935088, EPI_ISL_935089, EPI_ISL_935090, EPI_ISL_935091, EPI_ISL_935093, EPI_ISL_935094, EPI_ISL_935095, EPI_ISL_935097, EPI_ISL_935098, EPI_ISL_935100, EPI_ISL_935101                                                                                                                                                                                                                                                                                                                                                                                                                                                                                                                                                                                                                                                                                                                                                                                                                                                                                                                                                                                                                                                                                                                                                                                                                                                                                                 |                                                                                                                                          |                                                                                                        |                                                                                                                                                                                 |
| see above                                                                                                                                                                                                                                                                                                                                                                                                                                                                                                                                                                                                                                                                                                                                                                                                                                                                                                                                                                                                                                                                                                                                                                                                                                                                                                                                                                                                                                                                                                                                                                                                                                                                                                                                                                                                                                      | Ministry of Health Turkey                                                                                                                | Ministry of Health Turkey                                                                              | Fatma Bayrakdar, Yasemin Cogun, Süleyman Yalcin, Aye Baak Alta, Gülay Korukluolu                                                                                                |
| EPI_ISL_935187, EPI_ISL_935188, EPI_ISL_935189, EPI_ISL_935190, EPI_ISL_935191, EPI_ISL_935192, EPI_ISL_935193, EPI_ISL_935194, EPI_ISL_935195, EPI_ISL_935196, EPI_ISL_935197, EPI_ISL_935198, EPI_ISL_935199, EPI_ISL_935200, EPI_ISL_935201, EPI_ISL_935202, EPI_ISL_935203, EPI_ISL_935204, EPI_ISL_935210, EPI_ISL_935211, EPI_ISL_935227, EPI_ISL_935229, EPI_ISL_935230, EPI_ISL_935233, EPI_ISL_935234, EPI_ISL_935235, EPI_ISL_935236, EPI_ISL_935238, EPI_ISL_935243, EPI_ISL_935244, EPI_ISL_935245, EPI_ISL_935246, EPI_ISL_935247, EPI_ISL_935248, EPI_ISL_935249, EPI_ISL_935250, EPI_ISL_935251, EPI_ISL_935252, EPI_ISL_935253, EPI_ISL_935254, EPI_ISL_935255, EPI_ISL_935256, EPI_ISL_935257, EPI_ISL_935258, EPI_ISL_935259, EPI_ISL_935260, EPI_ISL_935261, EPI_ISL_935262, EPI_ISL_935263, EPI_ISL_935274, EPI_ISL_935276, EPI_ISL_935277, EPI_ISL_935278, EPI_ISL_935279, EPI_ISL_935285, EPI_ISL_935286, EPI_ISL_935287, EPI_ISL_935288, EPI_ISL_935289, EPI_ISL_935290, EPI_ISL_935291, EPI_ISL_935292, EPI_ISL_935293, EPI_ISL_935294, EPI_ISL_935295, EPI_ISL_935296, EPI_ISL_935297, EPI_ISL_935298, EPI_ISL_935299, EPI_ISL_935300, EPI_ISL_935306, EPI_ISL_935307, EPI_ISL_935308, EPI_ISL_935309, EPI_ISL_935310, EPI_ISL_935311, EPI_ISL_935313, EPI_ISL_935314, EPI_ISL_935315, EPI_ISL_935316, EPI_ISL_935318, EPI_ISL_935322, EPI_ISL_935323, EPI_ISL_935324, EPI_ISL_935326, EPI_ISL_935327, EPI_ISL_935328, EPI_ISL_935329, EPI_ISL_935330, EPI_ISL_935331, EPI_ISL_935332, EPI_ISL_935333, EPI_ISL_935334, EPI_ISL_935335, EPI_ISL_935336, EPI_ISL_935337, EPI_ISL_935338, EPI_ISL_935339, EPI_ISL_935340, EPI_ISL_935342, EPI_ISL_935343, EPI_ISL_935346, EPI_ISL_935347, EPI_ISL_935348, EPI_ISL_935349, EPI_ISL_935350, EPI_ISL_935352, EPI_ISL_935353, EPI_ISL_935354, EPI_ISL_935355, EPI_ISL_935358 |                                                                                                                                          |                                                                                                        |                                                                                                                                                                                 |
| see above                                                                                                                                                                                                                                                                                                                                                                                                                                                                                                                                                                                                                                                                                                                                                                                                                                                                                                                                                                                                                                                                                                                                                                                                                                                                                                                                                                                                                                                                                                                                                                                                                                                                                                                                                                                                                                      | KU Leuven, Rega Institute, Clinical and Epidemiological Virology                                                                         | KU Leuven, Rega Institute, Clinical and Epidemiological Virology                                       | Tony Wawina-Bokalanga, Bert Vanmechelen, Joan Marti-Carerras, Piet Maes                                                                                                         |
| EPI_ISL_935359, EPI_ISL_935360, EPI_ISL_935362, EPI_ISL_935364                                                                                                                                                                                                                                                                                                                                                                                                                                                                                                                                                                                                                                                                                                                                                                                                                                                                                                                                                                                                                                                                                                                                                                                                                                                                                                                                                                                                                                                                                                                                                                                                                                                                                                                                                                                 | Florida Bureau of Public Health Laboratories                                                                                             | Florida Bureau of Public Health Laboratories                                                           | Sarah Schmedes, Jason Blanton                                                                                                                                                   |
| EPI_ISL_935527, EPI_ISL_935528, EPI_ISL_935529, EPI_ISL_935530, EPI_ISL_935531, EPI_ISL_935532                                                                                                                                                                                                                                                                                                                                                                                                                                                                                                                                                                                                                                                                                                                                                                                                                                                                                                                                                                                                                                                                                                                                                                                                                                                                                                                                                                                                                                                                                                                                                                                                                                                                                                                                                 | Labo Analyses Med                                                                                                                        | National Reference Center for Viruses of Respiratory Infections, Institut Pasteur, Paris               | Marion Barbet, Sylvie Behillil, Méline Bizard, Angela Brisebarre, Camille Capel, Etienne Simon-Lorière, Vincent Enouf, Maud Vanpeene, Sylvie van der Werf, Merah Kader          |
| EPI_ISL_935537, EPI_ISL_935538                                                                                                                                                                                                                                                                                                                                                                                                                                                                                                                                                                                                                                                                                                                                                                                                                                                                                                                                                                                                                                                                                                                                                                                                                                                                                                                                                                                                                                                                                                                                                                                                                                                                                                                                                                                                                 | Labo Analyses Med                                                                                                                        | National Reference Center for Viruses of Respiratory Infections, Institut Pasteur, Paris               | Marion Barbet, Sylvie Behillil, Méline Bizard, Angela Brisebarre, Camille Capel, Etienne Simon-Lorière, Vincent Enouf, Maud Vanpeene, Sylvie van der Werf, Bonnaudet GéRaldine  |
| EPI_ISL_935539                                                                                                                                                                                                                                                                                                                                                                                                                                                                                                                                                                                                                                                                                                                                                                                                                                                                                                                                                                                                                                                                                                                                                                                                                                                                                                                                                                                                                                                                                                                                                                                                                                                                                                                                                                                                                                 | Labo Analyses Med                                                                                                                        | National Reference Center for Viruses of Respiratory Infections, Institut Pasteur, Paris               | Marion Barbet, Sylvie Behillil, Méline Bizard, Angela Brisebarre, Camille Capel, Etienne Simon-Lorière, Vincent Enouf, Maud Vanpeene, Sylvie van der Werf, Tomasi Florent       |
| EPI_ISL_935548                                                                                                                                                                                                                                                                                                                                                                                                                                                                                                                                                                                                                                                                                                                                                                                                                                                                                                                                                                                                                                                                                                                                                                                                                                                                                                                                                                                                                                                                                                                                                                                                                                                                                                                                                                                                                                 | Labo Analyses Med                                                                                                                        | National Reference Center for Viruses of Respiratory Infections, Institut Pasteur, Paris               | Marion Barbet, Sylvie Behillil, Méline Bizard, Angela Brisebarre, Camille Capel, Etienne Simon-Lorière, Vincent Enouf, Maud Vanpeene, Sylvie van der Werf, Pasquier             |
| EPI_ISL_935549                                                                                                                                                                                                                                                                                                                                                                                                                                                                                                                                                                                                                                                                                                                                                                                                                                                                                                                                                                                                                                                                                                                                                                                                                                                                                                                                                                                                                                                                                                                                                                                                                                                                                                                                                                                                                                 | Labo Analyses Med                                                                                                                        | National Reference Center for Viruses of Respiratory Infections, Institut Pasteur, Paris               | Marion Barbet, Sylvie Behillil, Méline Bizard, Angela Brisebarre, Camille Capel, Etienne Simon-Lorière, Vincent Enouf, Maud Vanpeene, Sylvie van der Werf                       |
| EPI_ISL_935552, EPI_ISL_935553, EPI_ISL_935554, EPI_ISL_935555, EPI_ISL_935556, EPI_ISL_935557                                                                                                                                                                                                                                                                                                                                                                                                                                                                                                                                                                                                                                                                                                                                                                                                                                                                                                                                                                                                                                                                                                                                                                                                                                                                                                                                                                                                                                                                                                                                                                                                                                                                                                                                                 | Hopital                                                                                                                                  | National Reference Center for Viruses of Respiratory Infections, Institut Pasteur, Paris               | Marion Barbet, Sylvie Behillil, Méline Bizard, Angela Brisebarre, Camille Capel, Etienne Simon-Lorière, Vincent Enouf, Maud Vanpeene, Sylvie van der Werf, Goudeau Alain        |
| EPI_ISL_935558                                                                                                                                                                                                                                                                                                                                                                                                                                                                                                                                                                                                                                                                                                                                                                                                                                                                                                                                                                                                                                                                                                                                                                                                                                                                                                                                                                                                                                                                                                                                                                                                                                                                                                                                                                                                                                 | Hopital                                                                                                                                  | National Reference Center for Viruses of Respiratory Infections, Institut Pasteur, Paris               | Marion Barbet, Sylvie Behillil, Méline Bizard, Angela Brisebarre, Camille Capel, Etienne Simon-Lorière, Vincent Enouf, Maud Vanpeene, Sylvie van der Werf                       |
| EPI_ISL_935561                                                                                                                                                                                                                                                                                                                                                                                                                                                                                                                                                                                                                                                                                                                                                                                                                                                                                                                                                                                                                                                                                                                                                                                                                                                                                                                                                                                                                                                                                                                                                                                                                                                                                                                                                                                                                                 | Hopital                                                                                                                                  | National Reference Center for Viruses of Respiratory Infections, Institut Pasteur, Paris               | Marion Barbet, Sylvie Behillil, Méline Bizard, Angela Brisebarre, Camille Capel, Etienne Simon-Lorière, Vincent Enouf, Maud Vanpeene, Sylvie van der Werf, Gaschet Anne         |
| EPI_ISL_935565                                                                                                                                                                                                                                                                                                                                                                                                                                                                                                                                                                                                                                                                                                                                                                                                                                                                                                                                                                                                                                                                                                                                                                                                                                                                                                                                                                                                                                                                                                                                                                                                                                                                                                                                                                                                                                 | Hopital                                                                                                                                  | National Reference Center for Viruses of Respiratory Infections, Institut Pasteur, Paris               | Marion Barbet, Sylvie Behillil, Méline Bizard, Angela Brisebarre, Camille Capel, Etienne Simon-Lorière, Vincent Enouf, Maud Vanpeene, Sylvie van der Werf, Bret Laurent         |
| EPI_ISL_935570, EPI_ISL_935571, EPI_ISL_935572, EPI_ISL_935573, EPI_ISL_935574, EPI_ISL_935575                                                                                                                                                                                                                                                                                                                                                                                                                                                                                                                                                                                                                                                                                                                                                                                                                                                                                                                                                                                                                                                                                                                                                                                                                                                                                                                                                                                                                                                                                                                                                                                                                                                                                                                                                 | Hopital                                                                                                                                  | National Reference Center for Viruses of Respiratory Infections, Institut Pasteur, Paris               | Marion Barbet, Sylvie Behillil, Méline Bizard, Angela Brisebarre, Camille Capel, Etienne Simon-Lorière, Vincent Enouf, Maud Vanpeene, Sylvie van der Werf, Castelain Sandrine   |
| EPI_ISL_935588, EPI_ISL_935589                                                                                                                                                                                                                                                                                                                                                                                                                                                                                                                                                                                                                                                                                                                                                                                                                                                                                                                                                                                                                                                                                                                                                                                                                                                                                                                                                                                                                                                                                                                                                                                                                                                                                                                                                                                                                 | Labo Analyses med                                                                                                                        | National Reference Center for Viruses of Respiratory Infections, Institut Pasteur, Paris               | Marion Barbet, Sylvie Behillil, Méline Bizard, Angela Brisebarre, Camille Capel, Etienne Simon-Lorière, Vincent Enouf, Maud Vanpeene, Sylvie van der Werf, Amzalag Jonas        |
| EPI_ISL_935590                                                                                                                                                                                                                                                                                                                                                                                                                                                                                                                                                                                                                                                                                                                                                                                                                                                                                                                                                                                                                                                                                                                                                                                                                                                                                                                                                                                                                                                                                                                                                                                                                                                                                                                                                                                                                                 | Labo Analyses Med                                                                                                                        | National Reference Center for Viruses of Respiratory Infections, Institut Pasteur, Paris               | Marion Barbet, Sylvie Behillil, Méline Bizard, Angela Brisebarre, Camille Capel, Etienne Simon-Lorière, Vincent Enouf, Maud Vanpeene, Sylvie van der Werf, Amzalag Jonas        |
| EPI_ISL_935591, EPI_ISL_935598, EPI_ISL_935603, EPI_ISL_935611, EPI_ISL_935616, EPI_ISL_935617, EPI_ISL_935618, EPI_ISL_935619, EPI_ISL_935620, EPI_ISL_935621, EPI_ISL_935622, EPI_ISL_935623, EPI_ISL_935624, EPI_ISL_935628, EPI_ISL_935629, EPI_ISL_935631, EPI_ISL_935635, EPI_ISL_935636                                                                                                                                                                                                                                                                                                                                                                                                                                                                                                                                                                                                                                                                                                                                                                                                                                                                                                                                                                                                                                                                                                                                                                                                                                                                                                                                                                                                                                                                                                                                                 |                                                                                                                                          |                                                                                                        |                                                                                                                                                                                 |
| see above                                                                                                                                                                                                                                                                                                                                                                                                                                                                                                                                                                                                                                                                                                                                                                                                                                                                                                                                                                                                                                                                                                                                                                                                                                                                                                                                                                                                                                                                                                                                                                                                                                                                                                                                                                                                                                      | Labo Analyses med                                                                                                                        | National Reference Center for Viruses of Respiratory Infections, Institut Pasteur, Paris               | Marion Barbet, Sylvie Behillil, Méline Bizard, Angela Brisebarre, Camille Capel, Etienne Simon-Lorière, Vincent Enouf, Maud Vanpeene, Sylvie van der Werf, Amzalag Jonas        |
| EPI_ISL_935643                                                                                                                                                                                                                                                                                                                                                                                                                                                                                                                                                                                                                                                                                                                                                                                                                                                                                                                                                                                                                                                                                                                                                                                                                                                                                                                                                                                                                                                                                                                                                                                                                                                                                                                                                                                                                                 | Labo Analyses Med                                                                                                                        | National Reference Center for Viruses of Respiratory Infections, Institut Pasteur, Paris               | Marion Barbet, Sylvie Behillil, Méline Bizard, Angela Brisebarre, Camille Capel, Etienne Simon-Lorière, Vincent Enouf, Maud Vanpeene, Sylvie van der Werf, Le Berre (D) David   |
| EPI_ISL_935644, EPI_ISL_935645, EPI_ISL_935646                                                                                                                                                                                                                                                                                                                                                                                                                                                                                                                                                                                                                                                                                                                                                                                                                                                                                                                                                                                                                                                                                                                                                                                                                                                                                                                                                                                                                                                                                                                                                                                                                                                                                                                                                                                                 | Labo Analyses Med                                                                                                                        | National Reference Center for Viruses of Respiratory Infections, Institut Pasteur, Paris               | Marion Barbet, Sylvie Behillil, Méline Bizard, Angela Brisebarre, Camille Capel, Etienne Simon-Lorière, Vincent Enouf, Maud Vanpeene, Sylvie van der Werf                       |
| EPI_ISL_935654, EPI_ISL_935655, EPI_ISL_935659, EPI_ISL_935664, EPI_ISL_935670                                                                                                                                                                                                                                                                                                                                                                                                                                                                                                                                                                                                                                                                                                                                                                                                                                                                                                                                                                                                                                                                                                                                                                                                                                                                                                                                                                                                                                                                                                                                                                                                                                                                                                                                                                 | Department of Clinical Microbiology                                                                                                      | GIGA Medical Genomics                                                                                  | Keith Durkin, Maria Artesi, Sébastien Bontems, Raphaël Boreux, Bouchra Boujemla, Cécile Meex, Pierrette Melin, Marie-Pierre Hayette, Vincent Bours                              |

|                                                                                                                                                                                                                                                                                                                                                                                                                                                                                                                                                                                                                                                |                                                       |                                                       |                                                                                                                                                                               |
|------------------------------------------------------------------------------------------------------------------------------------------------------------------------------------------------------------------------------------------------------------------------------------------------------------------------------------------------------------------------------------------------------------------------------------------------------------------------------------------------------------------------------------------------------------------------------------------------------------------------------------------------|-------------------------------------------------------|-------------------------------------------------------|-------------------------------------------------------------------------------------------------------------------------------------------------------------------------------|
| EPI_ISL_935716, EPI_ISL_935719,<br>EPI_ISL_935720                                                                                                                                                                                                                                                                                                                                                                                                                                                                                                                                                                                              | Houston Health Dept.                                  | Houston Health Dept.                                  | Ryker Penn, Pamela Brown, Adolpho Lara                                                                                                                                        |
| EPI_ISL_935976                                                                                                                                                                                                                                                                                                                                                                                                                                                                                                                                                                                                                                 | GLENS FALLS HOSPITAL LABORATORY                       | Wadsworth Center, New York State Department of Health | Kirsten St. George, Daryl M. Lamson, Alexis Russel, Matthew Shudt, Melissa A Leisner, Jonathan Plitnick, Navjot Singh, John Kelly, Erasmus Schneider, Erica Lasek-Nesselquist |
| EPI_ISL_935994, EPI_ISL_936010                                                                                                                                                                                                                                                                                                                                                                                                                                                                                                                                                                                                                 | SUNY UPSTATE MEDICAL UNIVERSITY                       | Wadsworth Center, New York State Department of Health | Kirsten St. George, Daryl M. Lamson, Alexis Russel, Matthew Shudt, Melissa A Leisner, Jonathan Plitnick, Navjot Singh, John Kelly, Erasmus Schneider, Erica Lasek-Nesselquist |
| EPI_ISL_936034                                                                                                                                                                                                                                                                                                                                                                                                                                                                                                                                                                                                                                 | THE MARY IMOGENE BASSETT HOSPITAL                     | Wadsworth Center, New York State Department of Health | Kirsten St. George, Daryl M. Lamson, Alexis Russel, Matthew Shudt, Melissa A Leisner, Jonathan Plitnick, Navjot Singh, John Kelly, Erasmus Schneider, Erica Lasek-Nesselquist |
| EPI_ISL_936062, EPI_ISL_936070, EPI_ISL_936074, EPI_ISL_936076, EPI_ISL_936078, EPI_ISL_936083, EPI_ISL_936084, EPI_ISL_936085, EPI_ISL_936088, EPI_ISL_936090, EPI_ISL_936096, EPI_ISL_936100                                                                                                                                                                                                                                                                                                                                                                                                                                                 |                                                       |                                                       |                                                                                                                                                                               |
| see above                                                                                                                                                                                                                                                                                                                                                                                                                                                                                                                                                                                                                                      | KALEIDA CENTER FOR LABORATORY MEDICINE                | Wadsworth Center, New York State Department of Health | Kirsten St. George, Daryl M. Lamson, Alexis Russel, Matthew Shudt, Melissa A Leisner, Jonathan Plitnick, Navjot Singh, John Kelly, Erasmus Schneider, Erica Lasek-Nesselquist |
| EPI_ISL_936107, EPI_ISL_936109, EPI_ISL_936113, EPI_ISL_936115, EPI_ISL_936116, EPI_ISL_936117, EPI_ISL_936118, EPI_ISL_936119, EPI_ISL_936121, EPI_ISL_936124, EPI_ISL_936127, EPI_ISL_936128                                                                                                                                                                                                                                                                                                                                                                                                                                                 |                                                       |                                                       |                                                                                                                                                                               |
| see above                                                                                                                                                                                                                                                                                                                                                                                                                                                                                                                                                                                                                                      | WESTCHESTER MEDICAL CENTER                            | Wadsworth Center, New York State Department of Health | Kirsten St. George, Daryl M. Lamson, Alexis Russel, Matthew Shudt, Melissa A Leisner, Jonathan Plitnick, Navjot Singh, John Kelly, Erasmus Schneider, Erica Lasek-Nesselquist |
| EPI_ISL_936142, EPI_ISL_936143                                                                                                                                                                                                                                                                                                                                                                                                                                                                                                                                                                                                                 | SUNY UPSTATE MEDICAL UNIVERSITY                       | Wadsworth Center, New York State Department of Health | Kirsten St. George, Daryl M. Lamson, Alexis Russel, Matthew Shudt, Melissa A Leisner, Jonathan Plitnick, Navjot Singh, John Kelly, Erasmus Schneider, Erica Lasek-Nesselquist |
| EPI_ISL_936144                                                                                                                                                                                                                                                                                                                                                                                                                                                                                                                                                                                                                                 | KALEIDA CENTER FOR LABORATORY MEDICINE                | Wadsworth Center, New York State Department of Health | Kirsten St. George, Daryl M. Lamson, Alexis Russel, Matthew Shudt, Melissa A Leisner, Jonathan Plitnick, Navjot Singh, John Kelly, Erasmus Schneider, Erica Lasek-Nesselquist |
| EPI_ISL_936218, EPI_ISL_936219, EPI_ISL_936220, EPI_ISL_936221, EPI_ISL_936222, EPI_ISL_936224, EPI_ISL_936230, EPI_ISL_936231, EPI_ISL_936232, EPI_ISL_936238, EPI_ISL_936241, EPI_ISL_936242, EPI_ISL_936243, EPI_ISL_936244, EPI_ISL_936245, EPI_ISL_936247                                                                                                                                                                                                                                                                                                                                                                                 |                                                       |                                                       |                                                                                                                                                                               |
| see above                                                                                                                                                                                                                                                                                                                                                                                                                                                                                                                                                                                                                                      | Wadsworth Center, New York State Department of Health | Wadsworth Center, New York State Department of Health | Kirsten St. George, Daryl M. Lamson, Alexis Russel, Matthew Shudt, Melissa A Leisner, Jonathan Plitnick, Navjot Singh, John Kelly, Erasmus Schneider, Erica Lasek-Nesselquist |
| EPI_ISL_936248, EPI_ISL_936249, EPI_ISL_936253, EPI_ISL_936254, EPI_ISL_936255, EPI_ISL_936263, EPI_ISL_936265, EPI_ISL_936269, EPI_ISL_936275, EPI_ISL_936281, EPI_ISL_936282, EPI_ISL_936285, EPI_ISL_936286, EPI_ISL_936289                                                                                                                                                                                                                                                                                                                                                                                                                 |                                                       |                                                       |                                                                                                                                                                               |
| see above                                                                                                                                                                                                                                                                                                                                                                                                                                                                                                                                                                                                                                      | MONTEFIORE MEDICAL CENTER LABORATORIES                | Wadsworth Center, New York State Department of Health | Kirsten St. George, Daryl M. Lamson, Alexis Russel, Matthew Shudt, Melissa A Leisner, Jonathan Plitnick, Navjot Singh, John Kelly, Erasmus Schneider, Erica Lasek-Nesselquist |
| EPI_ISL_936393                                                                                                                                                                                                                                                                                                                                                                                                                                                                                                                                                                                                                                 | TGen North                                            | TGen North                                            | Jolene Bowers, Megan Folkerts, Chris French, Hayley Yaglom, Ashlyn Pfeiffer, Darrin Lemmer, Dave Engelthaler, The Arizona COVID Genomics Union (ACGU)                         |
| EPI_ISL_936864, EPI_ISL_936868, EPI_ISL_936876, EPI_ISL_936877, EPI_ISL_936878, EPI_ISL_936879, EPI_ISL_936880, EPI_ISL_936881, EPI_ISL_936882, EPI_ISL_936884, EPI_ISL_936888, EPI_ISL_936889, EPI_ISL_936890, EPI_ISL_936892, EPI_ISL_936893, EPI_ISL_936895, EPI_ISL_936896, EPI_ISL_936899, EPI_ISL_936901, EPI_ISL_936902, EPI_ISL_936903, EPI_ISL_936904, EPI_ISL_936906, EPI_ISL_936907, EPI_ISL_936911, EPI_ISL_936912, EPI_ISL_936914, EPI_ISL_936915, EPI_ISL_936917, EPI_ISL_936918, EPI_ISL_936920, EPI_ISL_936921, EPI_ISL_936922, EPI_ISL_936924, EPI_ISL_936925, EPI_ISL_936926, EPI_ISL_936927, EPI_ISL_936928, EPI_ISL_936929 |                                                       |                                                       |                                                                                                                                                                               |
| see above                                                                                                                                                                                                                                                                                                                                                                                                                                                                                                                                                                                                                                      | Northwestern Memorial Hospital                        | Ozer Lab                                              | Ramon Lorenzo-Redondo, Lacy M. Simons, Chad J. Achenbach, Lawrence J. Jennings, Michael G. Ison, Judd F. Hultquist, Egon A. Ozer                                              |
| EPI_ISL_937126                                                                                                                                                                                                                                                                                                                                                                                                                                                                                                                                                                                                                                 | DOHMH Riverside                                       | New York City Public Health Laboratory                | Jade Wang, et al.                                                                                                                                                             |
| EPI_ISL_937136                                                                                                                                                                                                                                                                                                                                                                                                                                                                                                                                                                                                                                 | DOHMH Chelsea                                         | New York City Public Health Laboratory                | Jade Wang, et al.                                                                                                                                                             |
| EPI_ISL_937140, EPI_ISL_937142, EPI_ISL_937144                                                                                                                                                                                                                                                                                                                                                                                                                                                                                                                                                                                                 | DOHMH Corona                                          | New York City Public Health Laboratory                | Jade Wang, et al.                                                                                                                                                             |
| EPI_ISL_937145, EPI_ISL_937146, EPI_ISL_937150, EPI_ISL_937151                                                                                                                                                                                                                                                                                                                                                                                                                                                                                                                                                                                 | DOHMH Jamaica                                         | New York City Public Health Laboratory                | Jade Wang, et al.                                                                                                                                                             |
| EPI_ISL_937154, EPI_ISL_937156                                                                                                                                                                                                                                                                                                                                                                                                                                                                                                                                                                                                                 | DOHMH PHL                                             | New York City Public Health Laboratory                | Jade Wang, et al.                                                                                                                                                             |
| EPI_ISL_937158, EPI_ISL_937159, EPI_ISL_937163                                                                                                                                                                                                                                                                                                                                                                                                                                                                                                                                                                                                 | DOHMH Jamaica                                         | New York City Public Health Laboratory                | Jade Wang, et al.                                                                                                                                                             |
| EPI_ISL_937164                                                                                                                                                                                                                                                                                                                                                                                                                                                                                                                                                                                                                                 | DOHMH Corona                                          | New York City Public Health Laboratory                | Jade Wang, et al.                                                                                                                                                             |
| EPI_ISL_937166                                                                                                                                                                                                                                                                                                                                                                                                                                                                                                                                                                                                                                 | DOHMH Riverside                                       | New York City Public Health Laboratory                | Jade Wang, et al.                                                                                                                                                             |
| EPI_ISL_937171                                                                                                                                                                                                                                                                                                                                                                                                                                                                                                                                                                                                                                 | DOHMH PHL                                             | New York City Public Health Laboratory                | Jade Wang, et al.                                                                                                                                                             |
| EPI_ISL_937173                                                                                                                                                                                                                                                                                                                                                                                                                                                                                                                                                                                                                                 | DOHMH Crown Heights                                   | New York City Public Health Laboratory                | Jade Wang, et al.                                                                                                                                                             |
| EPI_ISL_937174                                                                                                                                                                                                                                                                                                                                                                                                                                                                                                                                                                                                                                 | DOHMH Chelsea                                         | New York City Public Health Laboratory                | Jade Wang, et al.                                                                                                                                                             |
| EPI_ISL_937176, EPI_ISL_937177                                                                                                                                                                                                                                                                                                                                                                                                                                                                                                                                                                                                                 | DOHMH Jamaica                                         | New York City Public Health Laboratory                | Jade Wang, et al.                                                                                                                                                             |
| EPI_ISL_937181, EPI_ISL_937183                                                                                                                                                                                                                                                                                                                                                                                                                                                                                                                                                                                                                 | DOHMH Corona                                          | New York City Public Health Laboratory                | Jade Wang, et al.                                                                                                                                                             |
| EPI_ISL_937185                                                                                                                                                                                                                                                                                                                                                                                                                                                                                                                                                                                                                                 | DOHMH PHL                                             | New York City Public Health Laboratory                | Jade Wang, et al.                                                                                                                                                             |
| EPI_ISL_937187                                                                                                                                                                                                                                                                                                                                                                                                                                                                                                                                                                                                                                 | OCME Office Of Chief Medical Examiner                 | New York City Public Health Laboratory                | Jade Wang, et al.                                                                                                                                                             |
| EPI_ISL_937192                                                                                                                                                                                                                                                                                                                                                                                                                                                                                                                                                                                                                                 | Department of Homeless Services                       | New York City Public Health Laboratory                | Jade Wang, et al.                                                                                                                                                             |
| EPI_ISL_937195, EPI_ISL_937196, EPI_ISL_937199                                                                                                                                                                                                                                                                                                                                                                                                                                                                                                                                                                                                 | OCME Office Of Chief Medical Examiner                 | New York City Public Health Laboratory                | Jade Wang, et al.                                                                                                                                                             |
| EPI_ISL_937201                                                                                                                                                                                                                                                                                                                                                                                                                                                                                                                                                                                                                                 | DOHMH Fort Greene                                     | New York City Public Health Laboratory                | Jade Wang, et al.                                                                                                                                                             |
| EPI_ISL_937202                                                                                                                                                                                                                                                                                                                                                                                                                                                                                                                                                                                                                                 | DOHMH Chelsea                                         | New York City Public Health Laboratory                | Jade Wang, et al.                                                                                                                                                             |
| EPI_ISL_937210, EPI_ISL_937211, EPI_ISL_937215                                                                                                                                                                                                                                                                                                                                                                                                                                                                                                                                                                                                 | DOHMH PHL                                             | New York City Public Health Laboratory                | Jade Wang, et al.                                                                                                                                                             |
| EPI_ISL_937216                                                                                                                                                                                                                                                                                                                                                                                                                                                                                                                                                                                                                                 | DOHMH Central Harlem                                  | New York City Public Health Laboratory                | Jade Wang, et al.                                                                                                                                                             |
| EPI_ISL_937217, EPI_ISL_937218                                                                                                                                                                                                                                                                                                                                                                                                                                                                                                                                                                                                                 | DOHMH Chelsea                                         | New York City Public Health Laboratory                | Jade Wang, et al.                                                                                                                                                             |
| EPI_ISL_937221, EPI_ISL_937225                                                                                                                                                                                                                                                                                                                                                                                                                                                                                                                                                                                                                 | DOHMH Jamaica                                         | New York City Public Health Laboratory                | Jade Wang, et al.                                                                                                                                                             |
| EPI_ISL_937228                                                                                                                                                                                                                                                                                                                                                                                                                                                                                                                                                                                                                                 | DOHMH Corona                                          | New York City Public Health Laboratory                | Jade Wang, et al.                                                                                                                                                             |
| EPI_ISL_937233, EPI_ISL_937234, EPI_ISL_937235, EPI_ISL_937236                                                                                                                                                                                                                                                                                                                                                                                                                                                                                                                                                                                 | DOHMH Morrisania                                      | New York City Public Health Laboratory                | Jade Wang, et al.                                                                                                                                                             |
| EPI_ISL_937237                                                                                                                                                                                                                                                                                                                                                                                                                                                                                                                                                                                                                                 | DOHMH Riverside                                       | New York City Public Health Laboratory                | Jade Wang, et al.                                                                                                                                                             |
| EPI_ISL_937240, EPI_ISL_937245                                                                                                                                                                                                                                                                                                                                                                                                                                                                                                                                                                                                                 | OCME Office Of Chief Medical Examiner                 | New York City Public Health Laboratory                | Jade Wang, et al.                                                                                                                                                             |
| EPI_ISL_937249                                                                                                                                                                                                                                                                                                                                                                                                                                                                                                                                                                                                                                 | Department of Homeless Services                       | New York City Public Health Laboratory                | Jade Wang, et al.                                                                                                                                                             |
| EPI_ISL_937253, EPI_ISL_937255                                                                                                                                                                                                                                                                                                                                                                                                                                                                                                                                                                                                                 | OCME Office Of Chief Medical Examiner                 | New York City Public Health Laboratory                | Jade Wang, et al.                                                                                                                                                             |



[illegible]

[illegible]

|                                                                                                                                                                                                                                                |                                                                                                                  |                                                                                                                              |                                                                                                                                                                                                                                                                                                             |
|------------------------------------------------------------------------------------------------------------------------------------------------------------------------------------------------------------------------------------------------|------------------------------------------------------------------------------------------------------------------|------------------------------------------------------------------------------------------------------------------------------|-------------------------------------------------------------------------------------------------------------------------------------------------------------------------------------------------------------------------------------------------------------------------------------------------------------|
| EPI_ISL_939536, EPI_ISL_939537                                                                                                                                                                                                                 | Lighthouse Lab in Milton Keynes                                                                                  | Wellcome Sanger Institute for the COVID-19 Genomics UK (COG-UK) Consortium                                                   | The Lighthouse Lab in Milton Keynes and Alex Alderton, Roberto Amato, Sonia Goncalves, Ewan Harrison, David K. Jackson, Ian Johnston, Dominic Kwiatkowski, Cordelia Langford, John Sillitoe on behalf of the Wellcome Sanger Institute COVID-19 Surveillance Team                                           |
| EPI_ISL_939539, EPI_ISL_939540                                                                                                                                                                                                                 | Lighthouse Lab in Glasgow                                                                                        | Wellcome Sanger Institute for the COVID-19 Genomics UK (COG-UK) Consortium                                                   | Harper VanSteenhouse, Yumi Kasai, David Gray, Carol Clugston, Anna Dominiczak and Alex Alderton, Roberto Amato, Sonia Goncalves, Ewan Harrison, David K. Jackson, Ian Johnston, Dominic Kwiatkowski, Cordelia Langford, John Sillitoe on behalf of the Wellcome Sanger Institute COVID-19 Surveillance Team |
| EPI_ISL_939542                                                                                                                                                                                                                                 | Lighthouse Lab in Milton Keynes                                                                                  | Wellcome Sanger Institute for the COVID-19 Genomics UK (COG-UK) Consortium                                                   | The Lighthouse Lab in Milton Keynes and Alex Alderton, Roberto Amato, Sonia Goncalves, Ewan Harrison, David K. Jackson, Ian Johnston, Dominic Kwiatkowski, Cordelia Langford, John Sillitoe on behalf of the Wellcome Sanger Institute COVID-19 Surveillance Team                                           |
| EPI_ISL_939544                                                                                                                                                                                                                                 | Lighthouse Lab in Glasgow                                                                                        | Wellcome Sanger Institute for the COVID-19 Genomics UK (COG-UK) Consortium                                                   | Harper VanSteenhouse, Yumi Kasai, David Gray, Carol Clugston, Anna Dominiczak and Alex Alderton, Roberto Amato, Sonia Goncalves, Ewan Harrison, David K. Jackson, Ian Johnston, Dominic Kwiatkowski, Cordelia Langford, John Sillitoe on behalf of the Wellcome Sanger Institute COVID-19 Surveillance Team |
| EPI_ISL_939548, EPI_ISL_939550, EPI_ISL_939551, EPI_ISL_939552                                                                                                                                                                                 | Lighthouse Lab in Milton Keynes                                                                                  | Wellcome Sanger Institute for the COVID-19 Genomics UK (COG-UK) Consortium                                                   | The Lighthouse Lab in Milton Keynes and Alex Alderton, Roberto Amato, Sonia Goncalves, Ewan Harrison, David K. Jackson, Ian Johnston, Dominic Kwiatkowski, Cordelia Langford, John Sillitoe on behalf of the Wellcome Sanger Institute COVID-19 Surveillance Team                                           |
| EPI_ISL_939553                                                                                                                                                                                                                                 | Lighthouse Lab in Glasgow                                                                                        | Wellcome Sanger Institute for the COVID-19 Genomics UK (COG-UK) Consortium                                                   | Harper VanSteenhouse, Yumi Kasai, David Gray, Carol Clugston, Anna Dominiczak and Alex Alderton, Roberto Amato, Sonia Goncalves, Ewan Harrison, David K. Jackson, Ian Johnston, Dominic Kwiatkowski, Cordelia Langford, John Sillitoe on behalf of the Wellcome Sanger Institute COVID-19 Surveillance Team |
| EPI_ISL_939559, EPI_ISL_939561, EPI_ISL_939562, EPI_ISL_939567                                                                                                                                                                                 | Lighthouse Lab in Milton Keynes                                                                                  | Wellcome Sanger Institute for the COVID-19 Genomics UK (COG-UK) Consortium                                                   | The Lighthouse Lab in Milton Keynes and Alex Alderton, Roberto Amato, Sonia Goncalves, Ewan Harrison, David K. Jackson, Ian Johnston, Dominic Kwiatkowski, Cordelia Langford, John Sillitoe on behalf of the Wellcome Sanger Institute COVID-19 Surveillance Team                                           |
| EPI_ISL_939570                                                                                                                                                                                                                                 | Lighthouse Lab in Glasgow                                                                                        | Wellcome Sanger Institute for the COVID-19 Genomics UK (COG-UK) Consortium                                                   | Harper VanSteenhouse, Yumi Kasai, David Gray, Carol Clugston, Anna Dominiczak and Alex Alderton, Roberto Amato, Sonia Goncalves, Ewan Harrison, David K. Jackson, Ian Johnston, Dominic Kwiatkowski, Cordelia Langford, John Sillitoe on behalf of the Wellcome Sanger Institute COVID-19 Surveillance Team |
| EPI_ISL_939571, EPI_ISL_939572, EPI_ISL_939573, EPI_ISL_939574                                                                                                                                                                                 | Lighthouse Lab in Milton Keynes                                                                                  | Wellcome Sanger Institute for the COVID-19 Genomics UK (COG-UK) Consortium                                                   | The Lighthouse Lab in Milton Keynes and Alex Alderton, Roberto Amato, Sonia Goncalves, Ewan Harrison, David K. Jackson, Ian Johnston, Dominic Kwiatkowski, Cordelia Langford, John Sillitoe on behalf of the Wellcome Sanger Institute COVID-19 Surveillance Team                                           |
| EPI_ISL_939575                                                                                                                                                                                                                                 | Lighthouse Lab in Glasgow                                                                                        | Wellcome Sanger Institute for the COVID-19 Genomics UK (COG-UK) Consortium                                                   | Harper VanSteenhouse, Yumi Kasai, David Gray, Carol Clugston, Anna Dominiczak and Alex Alderton, Roberto Amato, Sonia Goncalves, Ewan Harrison, David K. Jackson, Ian Johnston, Dominic Kwiatkowski, Cordelia Langford, John Sillitoe on behalf of the Wellcome Sanger Institute COVID-19 Surveillance Team |
| EPI_ISL_939578, EPI_ISL_939581, EPI_ISL_939582                                                                                                                                                                                                 | Lighthouse Lab in Milton Keynes                                                                                  | Wellcome Sanger Institute for the COVID-19 Genomics UK (COG-UK) Consortium                                                   | The Lighthouse Lab in Milton Keynes and Alex Alderton, Roberto Amato, Sonia Goncalves, Ewan Harrison, David K. Jackson, Ian Johnston, Dominic Kwiatkowski, Cordelia Langford, John Sillitoe on behalf of the Wellcome Sanger Institute COVID-19 Surveillance Team                                           |
| EPI_ISL_939583, EPI_ISL_939586, EPI_ISL_939587, EPI_ISL_939592                                                                                                                                                                                 | Lighthouse Lab in Glasgow                                                                                        | Wellcome Sanger Institute for the COVID-19 Genomics UK (COG-UK) Consortium                                                   | Harper VanSteenhouse, Yumi Kasai, David Gray, Carol Clugston, Anna Dominiczak and Alex Alderton, Roberto Amato, Sonia Goncalves, Ewan Harrison, David K. Jackson, Ian Johnston, Dominic Kwiatkowski, Cordelia Langford, John Sillitoe on behalf of the Wellcome Sanger Institute COVID-19 Surveillance Team |
| EPI_ISL_939594                                                                                                                                                                                                                                 | Lighthouse Lab in Milton Keynes                                                                                  | Wellcome Sanger Institute for the COVID-19 Genomics UK (COG-UK) Consortium                                                   | The Lighthouse Lab in Milton Keynes and Alex Alderton, Roberto Amato, Sonia Goncalves, Ewan Harrison, David K. Jackson, Ian Johnston, Dominic Kwiatkowski, Cordelia Langford, John Sillitoe on behalf of the Wellcome Sanger Institute COVID-19 Surveillance Team                                           |
| EPI_ISL_939597                                                                                                                                                                                                                                 | Lighthouse Lab in Glasgow                                                                                        | Wellcome Sanger Institute for the COVID-19 Genomics UK (COG-UK) Consortium                                                   | Harper VanSteenhouse, Yumi Kasai, David Gray, Carol Clugston, Anna Dominiczak and Alex Alderton, Roberto Amato, Sonia Goncalves, Ewan Harrison, David K. Jackson, Ian Johnston, Dominic Kwiatkowski, Cordelia Langford, John Sillitoe on behalf of the Wellcome Sanger Institute COVID-19 Surveillance Team |
| EPI_ISL_939598, EPI_ISL_939600                                                                                                                                                                                                                 | Lighthouse Lab in Milton Keynes                                                                                  | Wellcome Sanger Institute for the COVID-19 Genomics UK (COG-UK) Consortium                                                   | The Lighthouse Lab in Milton Keynes and Alex Alderton, Roberto Amato, Sonia Goncalves, Ewan Harrison, David K. Jackson, Ian Johnston, Dominic Kwiatkowski, Cordelia Langford, John Sillitoe on behalf of the Wellcome Sanger Institute COVID-19 Surveillance Team                                           |
| EPI_ISL_939602                                                                                                                                                                                                                                 | Lighthouse Lab in Glasgow                                                                                        | Wellcome Sanger Institute for the COVID-19 Genomics UK (COG-UK) Consortium                                                   | Harper VanSteenhouse, Yumi Kasai, David Gray, Carol Clugston, Anna Dominiczak and Alex Alderton, Roberto Amato, Sonia Goncalves, Ewan Harrison, David K. Jackson, Ian Johnston, Dominic Kwiatkowski, Cordelia Langford, John Sillitoe on behalf of the Wellcome Sanger Institute COVID-19 Surveillance Team |
| EPI_ISL_939603, EPI_ISL_939605                                                                                                                                                                                                                 | Lighthouse Lab in Milton Keynes                                                                                  | Wellcome Sanger Institute for the COVID-19 Genomics UK (COG-UK) Consortium                                                   | The Lighthouse Lab in Milton Keynes and Alex Alderton, Roberto Amato, Sonia Goncalves, Ewan Harrison, David K. Jackson, Ian Johnston, Dominic Kwiatkowski, Cordelia Langford, John Sillitoe on behalf of the Wellcome Sanger Institute COVID-19 Surveillance Team                                           |
| EPI_ISL_939608                                                                                                                                                                                                                                 | Lighthouse Lab in Alderley Park                                                                                  | Wellcome Sanger Institute for the COVID-19 Genomics UK (COG-UK) Consortium                                                   | Jacquelyn Wynn, Mairead Hyland, The Lighthouse Lab in Alderley Park and Alex Alderton, Roberto Amato, Sonia Goncalves, Ewan Harrison, David K. Jackson, Ian Johnston, Dominic Kwiatkowski, Cordelia Langford, John Sillitoe on behalf of the Wellcome Sanger Institute COVID-19 Surveillance Team           |
| EPI_ISL_939609, EPI_ISL_939613, EPI_ISL_939617                                                                                                                                                                                                 | Los Angeles County PHL                                                                                           | Los Angeles County PHL                                                                                                       | P. Hemarajata et al.                                                                                                                                                                                                                                                                                        |
| EPI_ISL_939629, EPI_ISL_939643                                                                                                                                                                                                                 | Laboratory of Virology and Molecular Diagnostics                                                                 | Institute of Public Health of Republic of North Macedonia Laboratory of Virology and Molecular Diagnostics                   | Maja Kuzmanovska, Golubinka Boshevska, Elizabeta Janchevska                                                                                                                                                                                                                                                 |
| EPI_ISL_939647                                                                                                                                                                                                                                 | Laboratory for Respiratory Viruses, Cantacuzino National Military-Medical Institute for Research and Development | Cantacuzino Institute Virology                                                                                               | Luiza Ustea, Nicoleta Paraschiv, Mihaela Lazar                                                                                                                                                                                                                                                              |
| EPI_ISL_939654                                                                                                                                                                                                                                 | GZA Sint-Augustinus Hospital                                                                                     | UAntwerp, Laboratory of Medical Microbiology, Campus Drie Eiken S6.26, Universiteitsplein 1, 2610, Wilrijk, Antwerp, Belgium | Basil Britto Xavier, Jasmine Coppens, Marie Le Mercier, Christine Lammens, Veerle Matheeußen, Herman Goossens                                                                                                                                                                                               |
| EPI_ISL_940144                                                                                                                                                                                                                                 | Laboratory for Respiratory Viruses, Cantacuzino National Military-Medical Institute for Research and Development | Cantacuzino Institute Virology                                                                                               | Luiza Ustea, Nicoleta Paraschiv, Mihaela Lazar                                                                                                                                                                                                                                                              |
| EPI_ISL_940146                                                                                                                                                                                                                                 | Laboratory of Virology and Molecular Diagnostics                                                                 | Institute of Public Health of Republic of North Macedonia Laboratory of Virology and Molecular Diagnostics                   | Maja Kuzmanovska, Golubinka Boshevska, Elizabeta Janchevska                                                                                                                                                                                                                                                 |
| EPI_ISL_940157                                                                                                                                                                                                                                 | Laboratory of Virology and Molecular Diagnostics                                                                 | Institute of Public Health of Republic of North Macedonia Laboratory of Virology and Molecular Diagnostics                   | Maja Kuzmanovska, Golubinka Boshevska, Elizabeta Janchevska                                                                                                                                                                                                                                                 |
| EPI_ISL_940554                                                                                                                                                                                                                                 | Laboratory for Respiratory Viruses, Cantacuzino National Military-Medical Institute for Research and Development | Cantacuzino Institute Virology                                                                                               | Luiza Ustea, Nicoleta Paraschiv, Mihaela Lazar                                                                                                                                                                                                                                                              |
| EPI_ISL_940565                                                                                                                                                                                                                                 | University of Bari Biomedical Sciences and Human Oncology                                                        | University of Bari Biomedical Sciences and Human Oncology                                                                    | Chironna M., Sallustio A., Loconsole D., Accogli M.                                                                                                                                                                                                                                                         |
| EPI_ISL_940566, EPI_ISL_940567, EPI_ISL_940568, EPI_ISL_940571                                                                                                                                                                                 | Jessa                                                                                                            | Jessa                                                                                                                        | Jessa_cmdLab                                                                                                                                                                                                                                                                                                |
| EPI_ISL_940573, EPI_ISL_940574, EPI_ISL_940575                                                                                                                                                                                                 | AZT                                                                                                              | Jessa                                                                                                                        | Jessa_cmdLab                                                                                                                                                                                                                                                                                                |
| EPI_ISL_940577, EPI_ISL_940584, EPI_ISL_940585, EPI_ISL_940589, EPI_ISL_940590, EPI_ISL_940592, EPI_ISL_940593, EPI_ISL_940594, EPI_ISL_940595, EPI_ISL_940596, EPI_ISL_940597, EPI_ISL_940599, EPI_ISL_940601, EPI_ISL_940603, EPI_ISL_940605 | see above                                                                                                        | Jessa                                                                                                                        | Jessa_cmdLab                                                                                                                                                                                                                                                                                                |
| EPI_ISL_940609                                                                                                                                                                                                                                 | Hospital e Maternidade Celso Pierro                                                                              | Instituto Adolfo Lutz, Interdisciplinary Procedures Center, Strategic Laboratory                                             | Claudio Tavares Sacchi, Claudia Regina Gonçalves, Erica Valessa Ramos Gomes, Karoline Rodrigues Campos                                                                                                                                                                                                      |
| EPI_ISL_940610, EPI_ISL_940611                                                                                                                                                                                                                 | Hospital Paulistano Paulista                                                                                     | Instituto Adolfo Lutz, Interdisciplinary Procedures Center, Strategic Laboratory                                             | Claudio Tavares Sacchi, Claudia Regina Gonçalves, Erica Valessa Ramos Gomes, Karoline Rodrigues Campos                                                                                                                                                                                                      |









[illegible]

[illegible]

[illegible]

[illegible]

[illegible]

[illegible]





|                                                                                                                                                                                                                                                                                                                                                                                                                                                                                                                                                                                                                                                                                                                                                                                                                                                                                                                                                                                                                                                                                                                                                                                                                                                                                                                                                                                                                                                                                                                                                                                                                                                                                                                                                                                                                                                                                                                                                                                                                                                                                                                                                                                                                                                                                                                                                                                                                                                                                                                                                                                                                                                                                                                                                                                                                                                                                                                                                                                                                                                                                                                                                                                                                                                                                                                                                                                                                                                                                                                                                                                                                                                                                                                                                                                                                                                                                                                                                                                                                                                                                                                                                                                                                                                                                                                                                                                                                                                                                                                                                                                                                                                                                                                                                                                                                                                                          |                                 |                                                                            |                                                                                                                                                                                                                                                                                                             |
|--------------------------------------------------------------------------------------------------------------------------------------------------------------------------------------------------------------------------------------------------------------------------------------------------------------------------------------------------------------------------------------------------------------------------------------------------------------------------------------------------------------------------------------------------------------------------------------------------------------------------------------------------------------------------------------------------------------------------------------------------------------------------------------------------------------------------------------------------------------------------------------------------------------------------------------------------------------------------------------------------------------------------------------------------------------------------------------------------------------------------------------------------------------------------------------------------------------------------------------------------------------------------------------------------------------------------------------------------------------------------------------------------------------------------------------------------------------------------------------------------------------------------------------------------------------------------------------------------------------------------------------------------------------------------------------------------------------------------------------------------------------------------------------------------------------------------------------------------------------------------------------------------------------------------------------------------------------------------------------------------------------------------------------------------------------------------------------------------------------------------------------------------------------------------------------------------------------------------------------------------------------------------------------------------------------------------------------------------------------------------------------------------------------------------------------------------------------------------------------------------------------------------------------------------------------------------------------------------------------------------------------------------------------------------------------------------------------------------------------------------------------------------------------------------------------------------------------------------------------------------------------------------------------------------------------------------------------------------------------------------------------------------------------------------------------------------------------------------------------------------------------------------------------------------------------------------------------------------------------------------------------------------------------------------------------------------------------------------------------------------------------------------------------------------------------------------------------------------------------------------------------------------------------------------------------------------------------------------------------------------------------------------------------------------------------------------------------------------------------------------------------------------------------------------------------------------------------------------------------------------------------------------------------------------------------------------------------------------------------------------------------------------------------------------------------------------------------------------------------------------------------------------------------------------------------------------------------------------------------------------------------------------------------------------------------------------------------------------------------------------------------------------------------------------------------------------------------------------------------------------------------------------------------------------------------------------------------------------------------------------------------------------------------------------------------------------------------------------------------------------------------------------------------------------------------------------------------------------------------------------|---------------------------------|----------------------------------------------------------------------------|-------------------------------------------------------------------------------------------------------------------------------------------------------------------------------------------------------------------------------------------------------------------------------------------------------------|
| EPI_ISL_946410, EPI_ISL_946411                                                                                                                                                                                                                                                                                                                                                                                                                                                                                                                                                                                                                                                                                                                                                                                                                                                                                                                                                                                                                                                                                                                                                                                                                                                                                                                                                                                                                                                                                                                                                                                                                                                                                                                                                                                                                                                                                                                                                                                                                                                                                                                                                                                                                                                                                                                                                                                                                                                                                                                                                                                                                                                                                                                                                                                                                                                                                                                                                                                                                                                                                                                                                                                                                                                                                                                                                                                                                                                                                                                                                                                                                                                                                                                                                                                                                                                                                                                                                                                                                                                                                                                                                                                                                                                                                                                                                                                                                                                                                                                                                                                                                                                                                                                                                                                                                                           | Lighthouse Lab in Glasgow       | Wellcome Sanger Institute for the COVID-19 Genomics UK (COG-UK) Consortium | Harper VanSteenhouse, Yumi Kasai, David Gray, Carol Clugston, Anna Dominiczak and Alex Alderton, Roberto Amato, Sonia Goncalves, Ewan Harrison, David K. Jackson, Ian Johnston, Dominic Kwiatkowski, Cordelia Langford, John Sillitoe on behalf of the Wellcome Sanger Institute COVID-19 Surveillance Team |
| EPI_ISL_946414, EPI_ISL_946415, EPI_ISL_946416, EPI_ISL_946417, EPI_ISL_946418                                                                                                                                                                                                                                                                                                                                                                                                                                                                                                                                                                                                                                                                                                                                                                                                                                                                                                                                                                                                                                                                                                                                                                                                                                                                                                                                                                                                                                                                                                                                                                                                                                                                                                                                                                                                                                                                                                                                                                                                                                                                                                                                                                                                                                                                                                                                                                                                                                                                                                                                                                                                                                                                                                                                                                                                                                                                                                                                                                                                                                                                                                                                                                                                                                                                                                                                                                                                                                                                                                                                                                                                                                                                                                                                                                                                                                                                                                                                                                                                                                                                                                                                                                                                                                                                                                                                                                                                                                                                                                                                                                                                                                                                                                                                                                                           | Lighthouse Lab in Milton Keynes | Wellcome Sanger Institute for the COVID-19 Genomics UK (COG-UK) Consortium | The Lighthouse Lab in Milton Keynes and Alex Alderton, Roberto Amato, Sonia Goncalves, Ewan Harrison, David K. Jackson, Ian Johnston, Dominic Kwiatkowski, Cordelia Langford, John Sillitoe on behalf of the Wellcome Sanger Institute COVID-19 Surveillance Team                                           |
| EPI_ISL_946419                                                                                                                                                                                                                                                                                                                                                                                                                                                                                                                                                                                                                                                                                                                                                                                                                                                                                                                                                                                                                                                                                                                                                                                                                                                                                                                                                                                                                                                                                                                                                                                                                                                                                                                                                                                                                                                                                                                                                                                                                                                                                                                                                                                                                                                                                                                                                                                                                                                                                                                                                                                                                                                                                                                                                                                                                                                                                                                                                                                                                                                                                                                                                                                                                                                                                                                                                                                                                                                                                                                                                                                                                                                                                                                                                                                                                                                                                                                                                                                                                                                                                                                                                                                                                                                                                                                                                                                                                                                                                                                                                                                                                                                                                                                                                                                                                                                           | Lighthouse Lab in Glasgow       | Wellcome Sanger Institute for the COVID-19 Genomics UK (COG-UK) Consortium | Harper VanSteenhouse, Yumi Kasai, David Gray, Carol Clugston, Anna Dominiczak and Alex Alderton, Roberto Amato, Sonia Goncalves, Ewan Harrison, David K. Jackson, Ian Johnston, Dominic Kwiatkowski, Cordelia Langford, John Sillitoe on behalf of the Wellcome Sanger Institute COVID-19 Surveillance Team |
| EPI_ISL_946420                                                                                                                                                                                                                                                                                                                                                                                                                                                                                                                                                                                                                                                                                                                                                                                                                                                                                                                                                                                                                                                                                                                                                                                                                                                                                                                                                                                                                                                                                                                                                                                                                                                                                                                                                                                                                                                                                                                                                                                                                                                                                                                                                                                                                                                                                                                                                                                                                                                                                                                                                                                                                                                                                                                                                                                                                                                                                                                                                                                                                                                                                                                                                                                                                                                                                                                                                                                                                                                                                                                                                                                                                                                                                                                                                                                                                                                                                                                                                                                                                                                                                                                                                                                                                                                                                                                                                                                                                                                                                                                                                                                                                                                                                                                                                                                                                                                           | Lighthouse Lab in Milton Keynes | Wellcome Sanger Institute for the COVID-19 Genomics UK (COG-UK) Consortium | The Lighthouse Lab in Milton Keynes and Alex Alderton, Roberto Amato, Sonia Goncalves, Ewan Harrison, David K. Jackson, Ian Johnston, Dominic Kwiatkowski, Cordelia Langford, John Sillitoe on behalf of the Wellcome Sanger Institute COVID-19 Surveillance Team                                           |
| EPI_ISL_946421, EPI_ISL_946422, EPI_ISL_946423, EPI_ISL_946424, EPI_ISL_946426, EPI_ISL_946427, EPI_ISL_946428, EPI_ISL_946430, EPI_ISL_946431, EPI_ISL_946432, EPI_ISL_946433, EPI_ISL_946434, EPI_ISL_946435, EPI_ISL_946436, EPI_ISL_946437, EPI_ISL_946438, EPI_ISL_946440, EPI_ISL_946441, EPI_ISL_946442, EPI_ISL_946443, EPI_ISL_946445, EPI_ISL_946452, EPI_ISL_946453, EPI_ISL_946455, EPI_ISL_946460, EPI_ISL_946462, EPI_ISL_946463, EPI_ISL_946466, EPI_ISL_946469, EPI_ISL_946471, EPI_ISL_946478, EPI_ISL_946480, EPI_ISL_946481, EPI_ISL_946484, EPI_ISL_946489, EPI_ISL_946492, EPI_ISL_946494, EPI_ISL_946495, EPI_ISL_946496, EPI_ISL_946497, EPI_ISL_946498, EPI_ISL_946503, EPI_ISL_946504, EPI_ISL_946505, EPI_ISL_946511, EPI_ISL_946512, EPI_ISL_946515, EPI_ISL_946520, EPI_ISL_946521, EPI_ISL_946522, EPI_ISL_946524, EPI_ISL_946528, EPI_ISL_946530, EPI_ISL_946531, EPI_ISL_946533, EPI_ISL_946535, EPI_ISL_946538, EPI_ISL_946541, EPI_ISL_946544, EPI_ISL_946547, EPI_ISL_946550, EPI_ISL_946551, EPI_ISL_946552, EPI_ISL_946553, EPI_ISL_946554, EPI_ISL_946555, EPI_ISL_946556, EPI_ISL_946561, EPI_ISL_946562, EPI_ISL_946563, EPI_ISL_946565, EPI_ISL_946570, EPI_ISL_946571, EPI_ISL_946575, EPI_ISL_946578, EPI_ISL_946582, EPI_ISL_946586, EPI_ISL_946587, EPI_ISL_946589, EPI_ISL_946590, EPI_ISL_946591, EPI_ISL_946593, EPI_ISL_946596, EPI_ISL_946603, EPI_ISL_946604, EPI_ISL_946605, EPI_ISL_946612, EPI_ISL_946613, EPI_ISL_946614, EPI_ISL_946619, EPI_ISL_946622, EPI_ISL_946631, EPI_ISL_946633, EPI_ISL_946637, EPI_ISL_946640, EPI_ISL_946652, EPI_ISL_946654, EPI_ISL_946661, EPI_ISL_946662, EPI_ISL_946663, EPI_ISL_946664, EPI_ISL_946665, EPI_ISL_946668, EPI_ISL_946673, EPI_ISL_946674, EPI_ISL_946678, EPI_ISL_946679, EPI_ISL_946680, EPI_ISL_946681, EPI_ISL_946684, EPI_ISL_946685, EPI_ISL_946686, EPI_ISL_946687, EPI_ISL_946688, EPI_ISL_946689, EPI_ISL_946690, EPI_ISL_946692, EPI_ISL_946693, EPI_ISL_946694, EPI_ISL_946696, EPI_ISL_946697, EPI_ISL_946702, EPI_ISL_946705, EPI_ISL_946706, EPI_ISL_946707, EPI_ISL_946708, EPI_ISL_946709, EPI_ISL_946710, EPI_ISL_946711, EPI_ISL_946712, EPI_ISL_946715, EPI_ISL_946716, EPI_ISL_946719, EPI_ISL_946724, EPI_ISL_946726, EPI_ISL_946727, EPI_ISL_946728, EPI_ISL_946729, EPI_ISL_946731, EPI_ISL_946732, EPI_ISL_946734, EPI_ISL_946735, EPI_ISL_946736, EPI_ISL_946739, EPI_ISL_946740, EPI_ISL_946741, EPI_ISL_946742, EPI_ISL_946743, EPI_ISL_946744, EPI_ISL_946745, EPI_ISL_946746, EPI_ISL_946752, EPI_ISL_946753, EPI_ISL_946755, EPI_ISL_946758, EPI_ISL_946759, EPI_ISL_946760, EPI_ISL_946762, EPI_ISL_946763, EPI_ISL_946764, EPI_ISL_946765, EPI_ISL_946766, EPI_ISL_946767, EPI_ISL_946768, EPI_ISL_946769, EPI_ISL_946771, EPI_ISL_946772, EPI_ISL_946773, EPI_ISL_946774, EPI_ISL_946776, EPI_ISL_946779, EPI_ISL_946782, EPI_ISL_946783, EPI_ISL_946784, EPI_ISL_946788, EPI_ISL_946789, EPI_ISL_946791, EPI_ISL_946794, EPI_ISL_946795, EPI_ISL_946796, EPI_ISL_946797, EPI_ISL_946798, EPI_ISL_946800, EPI_ISL_946805, EPI_ISL_946806, EPI_ISL_946807, EPI_ISL_946808, EPI_ISL_946810, EPI_ISL_946811, EPI_ISL_946813, EPI_ISL_946814, EPI_ISL_946816, EPI_ISL_946819, EPI_ISL_946821, EPI_ISL_946822, EPI_ISL_946823, EPI_ISL_946825, EPI_ISL_946826, EPI_ISL_946827, EPI_ISL_946828, EPI_ISL_946831, EPI_ISL_946835, EPI_ISL_946839, EPI_ISL_946840, EPI_ISL_946842, EPI_ISL_946843, EPI_ISL_946845, EPI_ISL_946849, EPI_ISL_946851, EPI_ISL_946852, EPI_ISL_946853, EPI_ISL_946854, EPI_ISL_946855, EPI_ISL_946857, EPI_ISL_946859, EPI_ISL_946861, EPI_ISL_946865, EPI_ISL_946866, EPI_ISL_946869, EPI_ISL_946870, EPI_ISL_946874, EPI_ISL_946875, EPI_ISL_946877, EPI_ISL_946878, EPI_ISL_946879, EPI_ISL_946881, EPI_ISL_946882, EPI_ISL_946885, EPI_ISL_946886, EPI_ISL_946888, EPI_ISL_946891, EPI_ISL_946892, EPI_ISL_946893, EPI_ISL_946894, EPI_ISL_946895, EPI_ISL_946896, EPI_ISL_946897, EPI_ISL_946898, EPI_ISL_946900, EPI_ISL_946901, EPI_ISL_946903, EPI_ISL_946906, EPI_ISL_946910, EPI_ISL_946911, EPI_ISL_946912, EPI_ISL_946914, EPI_ISL_946915, EPI_ISL_946916, EPI_ISL_946917, EPI_ISL_946923, EPI_ISL_946924, EPI_ISL_946927, EPI_ISL_946928, EPI_ISL_946929, EPI_ISL_946931, EPI_ISL_946932, EPI_ISL_946933, EPI_ISL_946934, EPI_ISL_946935, EPI_ISL_946938, EPI_ISL_946941, EPI_ISL_946943, EPI_ISL_946944, EPI_ISL_946945, EPI_ISL_946946, EPI_ISL_946947, EPI_ISL_946948, EPI_ISL_946949, EPI_ISL_946951, EPI_ISL_946953, EPI_ISL_946956, EPI_ISL_946957, EPI_ISL_946961, EPI_ISL_946964, EPI_ISL_946966, EPI_ISL_946967, EPI_ISL_946970, EPI_ISL_946971, EPI_ISL_946972, EPI_ISL_946976, EPI_ISL_946977, EPI_ISL_946978, EPI_ISL_946980, EPI_ISL_946981, EPI_ISL_946982, EPI_ISL_946986, EPI_ISL_946987, EPI_ISL_946988, EPI_ISL_946989, EPI_ISL_946991, EPI_ISL_946992, EPI_ISL_946994, EPI_ISL_ |                                 |                                                                            |                                                                                                                                                                                                                                                                                                             |



[illegible]











|                                                                                                                                                                                                                                                                                                                                                                                                                                                                                                                                                                                                                                                                                                                                                                                                                                                                                                                                                                                                                                                                                                                                                                                                                                                                                                                                                                                                                                                                                                                                                                                                                                                                                                                                                                                                                                                                                                                                                                                                                                |           |                                                           |                                                                                                            |                                                                                                                                                                                                                                                                                                             |
|--------------------------------------------------------------------------------------------------------------------------------------------------------------------------------------------------------------------------------------------------------------------------------------------------------------------------------------------------------------------------------------------------------------------------------------------------------------------------------------------------------------------------------------------------------------------------------------------------------------------------------------------------------------------------------------------------------------------------------------------------------------------------------------------------------------------------------------------------------------------------------------------------------------------------------------------------------------------------------------------------------------------------------------------------------------------------------------------------------------------------------------------------------------------------------------------------------------------------------------------------------------------------------------------------------------------------------------------------------------------------------------------------------------------------------------------------------------------------------------------------------------------------------------------------------------------------------------------------------------------------------------------------------------------------------------------------------------------------------------------------------------------------------------------------------------------------------------------------------------------------------------------------------------------------------------------------------------------------------------------------------------------------------|-----------|-----------------------------------------------------------|------------------------------------------------------------------------------------------------------------|-------------------------------------------------------------------------------------------------------------------------------------------------------------------------------------------------------------------------------------------------------------------------------------------------------------|
| EPI_ISL_948684, EPI_ISL_948686, EPI_ISL_948687, EPI_ISL_948688, EPI_ISL_948690, EPI_ISL_948694, EPI_ISL_948698, EPI_ISL_948700, EPI_ISL_948702, EPI_ISL_948705, EPI_ISL_948706, EPI_ISL_948709, EPI_ISL_948710, EPI_ISL_948711, EPI_ISL_948712, EPI_ISL_948713, EPI_ISL_948717, EPI_ISL_948723, EPI_ISL_948724, EPI_ISL_948726, EPI_ISL_948728, EPI_ISL_948729, EPI_ISL_948730, EPI_ISL_948732, EPI_ISL_948733, EPI_ISL_948739, EPI_ISL_948742, EPI_ISL_948744, EPI_ISL_948746, EPI_ISL_948747, EPI_ISL_948749, EPI_ISL_948750, EPI_ISL_948752, EPI_ISL_948753, EPI_ISL_948754, EPI_ISL_948755, EPI_ISL_948757, EPI_ISL_948761, EPI_ISL_948763, EPI_ISL_948765, EPI_ISL_948766, EPI_ISL_948769, EPI_ISL_948770, EPI_ISL_948771, EPI_ISL_948774, EPI_ISL_948775, EPI_ISL_948777, EPI_ISL_948778, EPI_ISL_948780, EPI_ISL_948782, EPI_ISL_948783, EPI_ISL_948784, EPI_ISL_948785                                                                                                                                                                                                                                                                                                                                                                                                                                                                                                                                                                                                                                                                                                                                                                                                                                                                                                                                                                                                                                                                                                                                                 | see above | Lighthouse Lab in Alderley Park                           | Wellcome Sanger Institute for the COVID-19 Genomics UK (COG-UK) Consortium                                 | Jacquelyn Wynn, Mairead Hyland, The Lighthouse Lab in Alderley Park and Alex Alderton, Roberto Amato, Sonia Goncalves, Ewan Harrison, David K. Jackson, Ian Johnston, Dominic Kwiatkowski, Cordelia Langford, John Sillitoe on behalf of the Wellcome Sanger Institute COVID-19 Surveillance Team           |
| EPI_ISL_948787, EPI_ISL_948788, EPI_ISL_948790, EPI_ISL_948792, EPI_ISL_948793, EPI_ISL_948795, EPI_ISL_948796, EPI_ISL_948797, EPI_ISL_948800, EPI_ISL_948801, EPI_ISL_948804, EPI_ISL_948805, EPI_ISL_948806, EPI_ISL_948809, EPI_ISL_948810, EPI_ISL_948812, EPI_ISL_948813, EPI_ISL_948814, EPI_ISL_948816, EPI_ISL_948817, EPI_ISL_948818, EPI_ISL_948819, EPI_ISL_948820, EPI_ISL_948821, EPI_ISL_948822, EPI_ISL_948824, EPI_ISL_948825, EPI_ISL_948826, EPI_ISL_948827, EPI_ISL_948828, EPI_ISL_948830, EPI_ISL_948832, EPI_ISL_948833, EPI_ISL_948834, EPI_ISL_948835, EPI_ISL_948836, EPI_ISL_948837, EPI_ISL_948838, EPI_ISL_948839, EPI_ISL_948840, EPI_ISL_948841, EPI_ISL_948842, EPI_ISL_948843, EPI_ISL_948844, EPI_ISL_948845, EPI_ISL_948848, EPI_ISL_948849, EPI_ISL_948851, EPI_ISL_948852, EPI_ISL_948854, EPI_ISL_948856, EPI_ISL_948857, EPI_ISL_948858, EPI_ISL_948859, EPI_ISL_948860, EPI_ISL_948861, EPI_ISL_948863, EPI_ISL_948865, EPI_ISL_948866, EPI_ISL_948867, EPI_ISL_948869, EPI_ISL_948871, EPI_ISL_948872, EPI_ISL_948873, EPI_ISL_948874, EPI_ISL_948877, EPI_ISL_948878, EPI_ISL_948879, EPI_ISL_948880, EPI_ISL_948881, EPI_ISL_948883, EPI_ISL_948884, EPI_ISL_948885, EPI_ISL_948886, EPI_ISL_948889, EPI_ISL_948890, EPI_ISL_948891, EPI_ISL_948893, EPI_ISL_948894, EPI_ISL_948895, EPI_ISL_948896, EPI_ISL_948898, EPI_ISL_948899, EPI_ISL_948904, EPI_ISL_948906, EPI_ISL_948907, EPI_ISL_948908, EPI_ISL_948910, EPI_ISL_948912, EPI_ISL_948913, EPI_ISL_948914, EPI_ISL_948915, EPI_ISL_948916, EPI_ISL_948919, EPI_ISL_948921, EPI_ISL_948922, EPI_ISL_948923, EPI_ISL_948924, EPI_ISL_948925, EPI_ISL_948926, EPI_ISL_948927, EPI_ISL_948928, EPI_ISL_948929, EPI_ISL_948931, EPI_ISL_948935, EPI_ISL_948937, EPI_ISL_948939, EPI_ISL_948946, EPI_ISL_948947, EPI_ISL_948950, EPI_ISL_948953, EPI_ISL_948956, EPI_ISL_948958, EPI_ISL_948961, EPI_ISL_948963, EPI_ISL_948966, EPI_ISL_948967, EPI_ISL_948969, EPI_ISL_948970, EPI_ISL_948972, EPI_ISL_948974, EPI_ISL_948977 | see above | Lighthouse Lab in Glasgow                                 | Wellcome Sanger Institute for the COVID-19 Genomics UK (COG-UK) Consortium                                 | Harper VanSteenhouse, Yumi Kasai, David Gray, Carol Clugston, Anna Dominiczak and Alex Alderton, Roberto Amato, Sonia Goncalves, Ewan Harrison, David K. Jackson, Ian Johnston, Dominic Kwiatkowski, Cordelia Langford, John Sillitoe on behalf of the Wellcome Sanger Institute COVID-19 Surveillance Team |
| EPI_ISL_948978                                                                                                                                                                                                                                                                                                                                                                                                                                                                                                                                                                                                                                                                                                                                                                                                                                                                                                                                                                                                                                                                                                                                                                                                                                                                                                                                                                                                                                                                                                                                                                                                                                                                                                                                                                                                                                                                                                                                                                                                                 |           | Jessa                                                     | Jessa                                                                                                      | Jessa_cmdLab                                                                                                                                                                                                                                                                                                |
| EPI_ISL_948979, EPI_ISL_948980                                                                                                                                                                                                                                                                                                                                                                                                                                                                                                                                                                                                                                                                                                                                                                                                                                                                                                                                                                                                                                                                                                                                                                                                                                                                                                                                                                                                                                                                                                                                                                                                                                                                                                                                                                                                                                                                                                                                                                                                 |           | Lighthouse Lab in Glasgow                                 | Wellcome Sanger Institute for the COVID-19 Genomics UK (COG-UK) Consortium                                 | Harper VanSteenhouse, Yumi Kasai, David Gray, Carol Clugston, Anna Dominiczak and Alex Alderton, Roberto Amato, Sonia Goncalves, Ewan Harrison, David K. Jackson, Ian Johnston, Dominic Kwiatkowski, Cordelia Langford, John Sillitoe on behalf of the Wellcome Sanger Institute COVID-19 Surveillance Team |
| EPI_ISL_948981                                                                                                                                                                                                                                                                                                                                                                                                                                                                                                                                                                                                                                                                                                                                                                                                                                                                                                                                                                                                                                                                                                                                                                                                                                                                                                                                                                                                                                                                                                                                                                                                                                                                                                                                                                                                                                                                                                                                                                                                                 |           | Jessa                                                     | Jessa                                                                                                      | Jessa_cmdLab                                                                                                                                                                                                                                                                                                |
| EPI_ISL_948982, EPI_ISL_948983                                                                                                                                                                                                                                                                                                                                                                                                                                                                                                                                                                                                                                                                                                                                                                                                                                                                                                                                                                                                                                                                                                                                                                                                                                                                                                                                                                                                                                                                                                                                                                                                                                                                                                                                                                                                                                                                                                                                                                                                 |           | Lighthouse Lab in Glasgow                                 | Wellcome Sanger Institute for the COVID-19 Genomics UK (COG-UK) Consortium                                 | Harper VanSteenhouse, Yumi Kasai, David Gray, Carol Clugston, Anna Dominiczak and Alex Alderton, Roberto Amato, Sonia Goncalves, Ewan Harrison, David K. Jackson, Ian Johnston, Dominic Kwiatkowski, Cordelia Langford, John Sillitoe on behalf of the Wellcome Sanger Institute COVID-19 Surveillance Team |
| EPI_ISL_948984                                                                                                                                                                                                                                                                                                                                                                                                                                                                                                                                                                                                                                                                                                                                                                                                                                                                                                                                                                                                                                                                                                                                                                                                                                                                                                                                                                                                                                                                                                                                                                                                                                                                                                                                                                                                                                                                                                                                                                                                                 |           | Jessa                                                     | Jessa                                                                                                      | Jessa_cmdLab                                                                                                                                                                                                                                                                                                |
| EPI_ISL_948985, EPI_ISL_948988                                                                                                                                                                                                                                                                                                                                                                                                                                                                                                                                                                                                                                                                                                                                                                                                                                                                                                                                                                                                                                                                                                                                                                                                                                                                                                                                                                                                                                                                                                                                                                                                                                                                                                                                                                                                                                                                                                                                                                                                 |           | Lighthouse Lab in Glasgow                                 | Wellcome Sanger Institute for the COVID-19 Genomics UK (COG-UK) Consortium                                 | Harper VanSteenhouse, Yumi Kasai, David Gray, Carol Clugston, Anna Dominiczak and Alex Alderton, Roberto Amato, Sonia Goncalves, Ewan Harrison, David K. Jackson, Ian Johnston, Dominic Kwiatkowski, Cordelia Langford, John Sillitoe on behalf of the Wellcome Sanger Institute COVID-19 Surveillance Team |
| EPI_ISL_948989, EPI_ISL_948991                                                                                                                                                                                                                                                                                                                                                                                                                                                                                                                                                                                                                                                                                                                                                                                                                                                                                                                                                                                                                                                                                                                                                                                                                                                                                                                                                                                                                                                                                                                                                                                                                                                                                                                                                                                                                                                                                                                                                                                                 |           | Jessa                                                     | Jessa                                                                                                      | Jessa_cmdLab                                                                                                                                                                                                                                                                                                |
| EPI_ISL_948993                                                                                                                                                                                                                                                                                                                                                                                                                                                                                                                                                                                                                                                                                                                                                                                                                                                                                                                                                                                                                                                                                                                                                                                                                                                                                                                                                                                                                                                                                                                                                                                                                                                                                                                                                                                                                                                                                                                                                                                                                 |           | Lighthouse Lab in Glasgow                                 | Wellcome Sanger Institute for the COVID-19 Genomics UK (COG-UK) Consortium                                 | Harper VanSteenhouse, Yumi Kasai, David Gray, Carol Clugston, Anna Dominiczak and Alex Alderton, Roberto Amato, Sonia Goncalves, Ewan Harrison, David K. Jackson, Ian Johnston, Dominic Kwiatkowski, Cordelia Langford, John Sillitoe on behalf of the Wellcome Sanger Institute COVID-19 Surveillance Team |
| EPI_ISL_948994                                                                                                                                                                                                                                                                                                                                                                                                                                                                                                                                                                                                                                                                                                                                                                                                                                                                                                                                                                                                                                                                                                                                                                                                                                                                                                                                                                                                                                                                                                                                                                                                                                                                                                                                                                                                                                                                                                                                                                                                                 |           | Jessa                                                     | Jessa                                                                                                      | Jessa_cmdLab                                                                                                                                                                                                                                                                                                |
| EPI_ISL_948995, EPI_ISL_948996                                                                                                                                                                                                                                                                                                                                                                                                                                                                                                                                                                                                                                                                                                                                                                                                                                                                                                                                                                                                                                                                                                                                                                                                                                                                                                                                                                                                                                                                                                                                                                                                                                                                                                                                                                                                                                                                                                                                                                                                 |           | Lighthouse Lab in Glasgow                                 | Wellcome Sanger Institute for the COVID-19 Genomics UK (COG-UK) Consortium                                 | Harper VanSteenhouse, Yumi Kasai, David Gray, Carol Clugston, Anna Dominiczak and Alex Alderton, Roberto Amato, Sonia Goncalves, Ewan Harrison, David K. Jackson, Ian Johnston, Dominic Kwiatkowski, Cordelia Langford, John Sillitoe on behalf of the Wellcome Sanger Institute COVID-19 Surveillance Team |
| EPI_ISL_948997                                                                                                                                                                                                                                                                                                                                                                                                                                                                                                                                                                                                                                                                                                                                                                                                                                                                                                                                                                                                                                                                                                                                                                                                                                                                                                                                                                                                                                                                                                                                                                                                                                                                                                                                                                                                                                                                                                                                                                                                                 |           | Jessa                                                     | Jessa                                                                                                      | Jessa_cmdLab                                                                                                                                                                                                                                                                                                |
| EPI_ISL_948998, EPI_ISL_948999                                                                                                                                                                                                                                                                                                                                                                                                                                                                                                                                                                                                                                                                                                                                                                                                                                                                                                                                                                                                                                                                                                                                                                                                                                                                                                                                                                                                                                                                                                                                                                                                                                                                                                                                                                                                                                                                                                                                                                                                 |           | Lighthouse Lab in Glasgow                                 | Wellcome Sanger Institute for the COVID-19 Genomics UK (COG-UK) Consortium                                 | Harper VanSteenhouse, Yumi Kasai, David Gray, Carol Clugston, Anna Dominiczak and Alex Alderton, Roberto Amato, Sonia Goncalves, Ewan Harrison, David K. Jackson, Ian Johnston, Dominic Kwiatkowski, Cordelia Langford, John Sillitoe on behalf of the Wellcome Sanger Institute COVID-19 Surveillance Team |
| EPI_ISL_949000                                                                                                                                                                                                                                                                                                                                                                                                                                                                                                                                                                                                                                                                                                                                                                                                                                                                                                                                                                                                                                                                                                                                                                                                                                                                                                                                                                                                                                                                                                                                                                                                                                                                                                                                                                                                                                                                                                                                                                                                                 |           | Jessa                                                     | Jessa                                                                                                      | Jessa_cmdLab                                                                                                                                                                                                                                                                                                |
| EPI_ISL_949001                                                                                                                                                                                                                                                                                                                                                                                                                                                                                                                                                                                                                                                                                                                                                                                                                                                                                                                                                                                                                                                                                                                                                                                                                                                                                                                                                                                                                                                                                                                                                                                                                                                                                                                                                                                                                                                                                                                                                                                                                 |           | Lighthouse Lab in Glasgow                                 | Wellcome Sanger Institute for the COVID-19 Genomics UK (COG-UK) Consortium                                 | Harper VanSteenhouse, Yumi Kasai, David Gray, Carol Clugston, Anna Dominiczak and Alex Alderton, Roberto Amato, Sonia Goncalves, Ewan Harrison, David K. Jackson, Ian Johnston, Dominic Kwiatkowski, Cordelia Langford, John Sillitoe on behalf of the Wellcome Sanger Institute COVID-19 Surveillance Team |
| EPI_ISL_949003, EPI_ISL_949005                                                                                                                                                                                                                                                                                                                                                                                                                                                                                                                                                                                                                                                                                                                                                                                                                                                                                                                                                                                                                                                                                                                                                                                                                                                                                                                                                                                                                                                                                                                                                                                                                                                                                                                                                                                                                                                                                                                                                                                                 |           | Jessa                                                     | Jessa                                                                                                      | Jessa_cmdLab                                                                                                                                                                                                                                                                                                |
| EPI_ISL_949006, EPI_ISL_949007                                                                                                                                                                                                                                                                                                                                                                                                                                                                                                                                                                                                                                                                                                                                                                                                                                                                                                                                                                                                                                                                                                                                                                                                                                                                                                                                                                                                                                                                                                                                                                                                                                                                                                                                                                                                                                                                                                                                                                                                 |           | Lighthouse Lab in Glasgow                                 | Wellcome Sanger Institute for the COVID-19 Genomics UK (COG-UK) Consortium                                 | Harper VanSteenhouse, Yumi Kasai, David Gray, Carol Clugston, Anna Dominiczak and Alex Alderton, Roberto Amato, Sonia Goncalves, Ewan Harrison, David K. Jackson, Ian Johnston, Dominic Kwiatkowski, Cordelia Langford, John Sillitoe on behalf of the Wellcome Sanger Institute COVID-19 Surveillance Team |
| EPI_ISL_949008                                                                                                                                                                                                                                                                                                                                                                                                                                                                                                                                                                                                                                                                                                                                                                                                                                                                                                                                                                                                                                                                                                                                                                                                                                                                                                                                                                                                                                                                                                                                                                                                                                                                                                                                                                                                                                                                                                                                                                                                                 |           | Jessa                                                     | Jessa                                                                                                      | Jessa_cmdLab                                                                                                                                                                                                                                                                                                |
| EPI_ISL_949009, EPI_ISL_949010                                                                                                                                                                                                                                                                                                                                                                                                                                                                                                                                                                                                                                                                                                                                                                                                                                                                                                                                                                                                                                                                                                                                                                                                                                                                                                                                                                                                                                                                                                                                                                                                                                                                                                                                                                                                                                                                                                                                                                                                 |           | Lighthouse Lab in Glasgow                                 | Wellcome Sanger Institute for the COVID-19 Genomics UK (COG-UK) Consortium                                 | Harper VanSteenhouse, Yumi Kasai, David Gray, Carol Clugston, Anna Dominiczak and Alex Alderton, Roberto Amato, Sonia Goncalves, Ewan Harrison, David K. Jackson, Ian Johnston, Dominic Kwiatkowski, Cordelia Langford, John Sillitoe on behalf of the Wellcome Sanger Institute COVID-19 Surveillance Team |
| EPI_ISL_949011, EPI_ISL_949013                                                                                                                                                                                                                                                                                                                                                                                                                                                                                                                                                                                                                                                                                                                                                                                                                                                                                                                                                                                                                                                                                                                                                                                                                                                                                                                                                                                                                                                                                                                                                                                                                                                                                                                                                                                                                                                                                                                                                                                                 |           | Jessa                                                     | Jessa                                                                                                      | Jessa_cmdLab                                                                                                                                                                                                                                                                                                |
| EPI_ISL_949014, EPI_ISL_949015, EPI_ISL_949017, EPI_ISL_949018, EPI_ISL_949025, EPI_ISL_949026, EPI_ISL_949027, EPI_ISL_949029, EPI_ISL_949030, EPI_ISL_949031, EPI_ISL_949033, EPI_ISL_949034, EPI_ISL_949036, EPI_ISL_949037, EPI_ISL_949039, EPI_ISL_949041, EPI_ISL_949042, EPI_ISL_949043, EPI_ISL_949044, EPI_ISL_949047, EPI_ISL_949048, EPI_ISL_949049, EPI_ISL_949050, EPI_ISL_949051, EPI_ISL_949053, EPI_ISL_949054, EPI_ISL_949056, EPI_ISL_949057, EPI_ISL_949058, EPI_ISL_949061, EPI_ISL_949063, EPI_ISL_949064, EPI_ISL_949065                                                                                                                                                                                                                                                                                                                                                                                                                                                                                                                                                                                                                                                                                                                                                                                                                                                                                                                                                                                                                                                                                                                                                                                                                                                                                                                                                                                                                                                                                 | see above | Lighthouse Lab in Glasgow                                 | Wellcome Sanger Institute for the COVID-19 Genomics UK (COG-UK) Consortium                                 | Harper VanSteenhouse, Yumi Kasai, David Gray, Carol Clugston, Anna Dominiczak and Alex Alderton, Roberto Amato, Sonia Goncalves, Ewan Harrison, David K. Jackson, Ian Johnston, Dominic Kwiatkowski, Cordelia Langford, John Sillitoe on behalf of the Wellcome Sanger Institute COVID-19 Surveillance Team |
| EPI_ISL_949070, EPI_ISL_949071, EPI_ISL_949072, EPI_ISL_949077, EPI_ISL_949078                                                                                                                                                                                                                                                                                                                                                                                                                                                                                                                                                                                                                                                                                                                                                                                                                                                                                                                                                                                                                                                                                                                                                                                                                                                                                                                                                                                                                                                                                                                                                                                                                                                                                                                                                                                                                                                                                                                                                 |           | Jessa                                                     | Jessa                                                                                                      | Jessa_cmdLab                                                                                                                                                                                                                                                                                                |
| EPI_ISL_949079, EPI_ISL_949080, EPI_ISL_949081                                                                                                                                                                                                                                                                                                                                                                                                                                                                                                                                                                                                                                                                                                                                                                                                                                                                                                                                                                                                                                                                                                                                                                                                                                                                                                                                                                                                                                                                                                                                                                                                                                                                                                                                                                                                                                                                                                                                                                                 |           | AZT                                                       | Jessa                                                                                                      | Jessa_cmdLab                                                                                                                                                                                                                                                                                                |
| EPI_ISL_949083, EPI_ISL_949084, EPI_ISL_949092, EPI_ISL_949095, EPI_ISL_949097, EPI_ISL_949099, EPI_ISL_949102, EPI_ISL_949103, EPI_ISL_949105, EPI_ISL_949106, EPI_ISL_949110, EPI_ISL_949112, EPI_ISL_949115, EPI_ISL_949117, EPI_ISL_949118, EPI_ISL_949119, EPI_ISL_949120, EPI_ISL_949121, EPI_ISL_949122, EPI_ISL_949126, EPI_ISL_949130, EPI_ISL_949131, EPI_ISL_949132, EPI_ISL_949133, EPI_ISL_949137, EPI_ISL_949138, EPI_ISL_949139, EPI_ISL_949142, EPI_ISL_949143, EPI_ISL_949147, EPI_ISL_949148, EPI_ISL_949150, EPI_ISL_949153, EPI_ISL_949156, EPI_ISL_949158, EPI_ISL_949159, EPI_ISL_949160, EPI_ISL_949161, EPI_ISL_949170, EPI_ISL_949171, EPI_ISL_949172, EPI_ISL_949175                                                                                                                                                                                                                                                                                                                                                                                                                                                                                                                                                                                                                                                                                                                                                                                                                                                                                                                                                                                                                                                                                                                                                                                                                                                                                                                                 | see above | Jessa                                                     | Jessa                                                                                                      | Jessa_cmdLab                                                                                                                                                                                                                                                                                                |
| EPI_ISL_949177, EPI_ISL_949178, EPI_ISL_949180                                                                                                                                                                                                                                                                                                                                                                                                                                                                                                                                                                                                                                                                                                                                                                                                                                                                                                                                                                                                                                                                                                                                                                                                                                                                                                                                                                                                                                                                                                                                                                                                                                                                                                                                                                                                                                                                                                                                                                                 |           | Laboratory of Virology and Molecular Diagnostics          | Institute of Public Health of Republic of North Macedonia Laboratory of Virology and Molecular Diagnostics | Maja Kuzmanovska, Golubinka Boshevsk                                                                                                                                                                                                                                                                        |
| EPI_ISL_949181                                                                                                                                                                                                                                                                                                                                                                                                                                                                                                                                                                                                                                                                                                                                                                                                                                                                                                                                                                                                                                                                                                                                                                                                                                                                                                                                                                                                                                                                                                                                                                                                                                                                                                                                                                                                                                                                                                                                                                                                                 |           | Laboratory of Virology and Molecular Diagnostics          | Institute of Public Health of Republic of North Macedonia Laboratory of Virology and Molecular Diagnostics | M. Kuzmanovska, G. Boshevsk                                                                                                                                                                                                                                                                                 |
| EPI_ISL_949182                                                                                                                                                                                                                                                                                                                                                                                                                                                                                                                                                                                                                                                                                                                                                                                                                                                                                                                                                                                                                                                                                                                                                                                                                                                                                                                                                                                                                                                                                                                                                                                                                                                                                                                                                                                                                                                                                                                                                                                                                 |           | University of Bari Biomedical Sciences and Human Oncology | University of Bari Biomedical Sciences and Human Oncology                                                  | Chironna M., Sallusto A., Loconsole D., Accogli M.                                                                                                                                                                                                                                                          |
| EPI_ISL_949183                                                                                                                                                                                                                                                                                                                                                                                                                                                                                                                                                                                                                                                                                                                                                                                                                                                                                                                                                                                                                                                                                                                                                                                                                                                                                                                                                                                                                                                                                                                                                                                                                                                                                                                                                                                                                                                                                                                                                                                                                 |           | National Institute of Health Research and Development     | National Institute of Health Research and Development                                                      | Kindi Adam; Holy Arif Wibowo; Ririn Ramadhany; Yuni Rukminiati; Agustiniingsih; Hana Apsari Pawestri; Subangkit; Kartika Dewi Puspa; Arie Ardiansyah                                                                                                                                                        |





[illegible]

|                                                                                                                                                                                                                                                                                                                                                                                                                                                                                                                                                                                |                                                                                                                                                                                                                                                                                                                                                                                                                                                                                               |                                                                                                                                                                        |                                                                                                                                                                                                                                                                                                                                                                                                                                                                                                                                                                                                                                                                                                                                                                                                                                                                                                                                                                                                       |
|--------------------------------------------------------------------------------------------------------------------------------------------------------------------------------------------------------------------------------------------------------------------------------------------------------------------------------------------------------------------------------------------------------------------------------------------------------------------------------------------------------------------------------------------------------------------------------|-----------------------------------------------------------------------------------------------------------------------------------------------------------------------------------------------------------------------------------------------------------------------------------------------------------------------------------------------------------------------------------------------------------------------------------------------------------------------------------------------|------------------------------------------------------------------------------------------------------------------------------------------------------------------------|-------------------------------------------------------------------------------------------------------------------------------------------------------------------------------------------------------------------------------------------------------------------------------------------------------------------------------------------------------------------------------------------------------------------------------------------------------------------------------------------------------------------------------------------------------------------------------------------------------------------------------------------------------------------------------------------------------------------------------------------------------------------------------------------------------------------------------------------------------------------------------------------------------------------------------------------------------------------------------------------------------|
| EPI_ISL_954059                                                                                                                                                                                                                                                                                                                                                                                                                                                                                                                                                                 | Labo Analyses Med                                                                                                                                                                                                                                                                                                                                                                                                                                                                             | National Reference Center for Viruses of Respiratory Infections, Institut Pasteur, Paris                                                                               | Marion Barbet, Sylvie Behillil, Méline Bizard, Angela Brisebarre, Camille Capel, Etienne Simon-Lorière, Vincent Enouf, Maud Vanpeene, Sylvie van der Werf,Holstein Anne                                                                                                                                                                                                                                                                                                                                                                                                                                                                                                                                                                                                                                                                                                                                                                                                                               |
| EPI_ISL_954060, EPI_ISL_954061, EPI_ISL_954062, EPI_ISL_954063, EPI_ISL_954064, EPI_ISL_954065, EPI_ISL_954066, EPI_ISL_954067                                                                                                                                                                                                                                                                                                                                                                                                                                                 | Labo Analyses Med                                                                                                                                                                                                                                                                                                                                                                                                                                                                             | National Reference Center for Viruses of Respiratory Infections, Institut Pasteur, Paris                                                                               | Marion Barbet, Sylvie Behillil, Méline Bizard, Angela Brisebarre, Camille Capel, Etienne Simon-Lorière, Vincent Enouf, Maud Vanpeene, Sylvie van der Werf,Breton-Cazaux Jérôme                                                                                                                                                                                                                                                                                                                                                                                                                                                                                                                                                                                                                                                                                                                                                                                                                        |
| EPI_ISL_954068, EPI_ISL_954069                                                                                                                                                                                                                                                                                                                                                                                                                                                                                                                                                 | Labo Analyses Med                                                                                                                                                                                                                                                                                                                                                                                                                                                                             | National Reference Center for Viruses of Respiratory Infections, Institut Pasteur, Paris                                                                               | Marion Barbet, Sylvie Behillil, Méline Bizard, Angela Brisebarre, Camille Capel, Etienne Simon-Lorière, Vincent Enouf, Maud Vanpeene, Sylvie van der Werf                                                                                                                                                                                                                                                                                                                                                                                                                                                                                                                                                                                                                                                                                                                                                                                                                                             |
| EPI_ISL_954070                                                                                                                                                                                                                                                                                                                                                                                                                                                                                                                                                                 | Labo Analyses Med                                                                                                                                                                                                                                                                                                                                                                                                                                                                             | National Reference Center for Viruses of Respiratory Infections, Institut Pasteur, Paris                                                                               | Marion Barbet, Sylvie Behillil, Méline Bizard, Angela Brisebarre, Camille Capel, Etienne Simon-Lorière, Vincent Enouf, Maud Vanpeene, Sylvie van der Werf,Michez Karine                                                                                                                                                                                                                                                                                                                                                                                                                                                                                                                                                                                                                                                                                                                                                                                                                               |
| EPI_ISL_954071, EPI_ISL_954072                                                                                                                                                                                                                                                                                                                                                                                                                                                                                                                                                 | Hopital                                                                                                                                                                                                                                                                                                                                                                                                                                                                                       | National Reference Center for Viruses of Respiratory Infections, Institut Pasteur, Paris                                                                               | Marion Barbet, Sylvie Behillil, Méline Bizard, Angela Brisebarre, Camille Capel, Etienne Simon-Lorière, Vincent Enouf, Maud Vanpeene, Sylvie van der Werf,Lagathu Gisèle                                                                                                                                                                                                                                                                                                                                                                                                                                                                                                                                                                                                                                                                                                                                                                                                                              |
| EPI_ISL_954073, EPI_ISL_954075                                                                                                                                                                                                                                                                                                                                                                                                                                                                                                                                                 | Outre Mer                                                                                                                                                                                                                                                                                                                                                                                                                                                                                     | National Reference Center for Viruses of Respiratory Infections, Institut Pasteur, Paris                                                                               | Marion Barbet, Sylvie Behillil, Méline Bizard, Angela Brisebarre, Camille Capel, Etienne Simon-Lorière, Vincent Enouf, Maud Vanpeene, Sylvie van der Werf,Rousset Dominique                                                                                                                                                                                                                                                                                                                                                                                                                                                                                                                                                                                                                                                                                                                                                                                                                           |
| EPI_ISL_954078, EPI_ISL_954079, EPI_ISL_954080                                                                                                                                                                                                                                                                                                                                                                                                                                                                                                                                 | Labo Analyses Med                                                                                                                                                                                                                                                                                                                                                                                                                                                                             | National Reference Center for Viruses of Respiratory Infections, Institut Pasteur, Paris                                                                               | Marion Barbet, Sylvie Behillil, Méline Bizard, Angela Brisebarre, Camille Capel, Etienne Simon-Lorière, Vincent Enouf, Maud Vanpeene, Sylvie van der Werf,Takoudju Eve-Marie                                                                                                                                                                                                                                                                                                                                                                                                                                                                                                                                                                                                                                                                                                                                                                                                                          |
| EPI_ISL_954082, EPI_ISL_954083, EPI_ISL_954084                                                                                                                                                                                                                                                                                                                                                                                                                                                                                                                                 | Recherche                                                                                                                                                                                                                                                                                                                                                                                                                                                                                     | National Reference Center for Viruses of Respiratory Infections, Institut Pasteur, Paris                                                                               | Marion Barbet, Sylvie Behillil, Méline Bizard, Angela Brisebarre, Camille Capel, Etienne Simon-Lorière, Vincent Enouf, Maud Vanpeene, Sylvie van der Werf,Leruez-Ville Marianne                                                                                                                                                                                                                                                                                                                                                                                                                                                                                                                                                                                                                                                                                                                                                                                                                       |
| EPI_ISL_954085, EPI_ISL_954086, EPI_ISL_954087, EPI_ISL_954089, EPI_ISL_954090                                                                                                                                                                                                                                                                                                                                                                                                                                                                                                 | Outre Mer                                                                                                                                                                                                                                                                                                                                                                                                                                                                                     | National Reference Center for Viruses of Respiratory Infections, Institut Pasteur, Paris                                                                               | Marion Barbet, Sylvie Behillil, Méline Bizard, Angela Brisebarre, Camille Capel, Etienne Simon-Lorière, Vincent Enouf, Maud Vanpeene, Sylvie van der Werf,Rousset Dominique                                                                                                                                                                                                                                                                                                                                                                                                                                                                                                                                                                                                                                                                                                                                                                                                                           |
| EPI_ISL_954091                                                                                                                                                                                                                                                                                                                                                                                                                                                                                                                                                                 | Labo Analyses Med                                                                                                                                                                                                                                                                                                                                                                                                                                                                             | National Reference Center for Viruses of Respiratory Infections, Institut Pasteur, Paris                                                                               | Marion Barbet, Sylvie Behillil, Méline Bizard, Angela Brisebarre, Camille Capel, Etienne Simon-Lorière, Vincent Enouf, Maud Vanpeene, Sylvie van der Werf,Besson J                                                                                                                                                                                                                                                                                                                                                                                                                                                                                                                                                                                                                                                                                                                                                                                                                                    |
| EPI_ISL_954092                                                                                                                                                                                                                                                                                                                                                                                                                                                                                                                                                                 | Labo Analyses Med                                                                                                                                                                                                                                                                                                                                                                                                                                                                             | National Reference Center for Viruses of Respiratory Infections, Institut Pasteur, Paris                                                                               | Marion Barbet, Sylvie Behillil, Méline Bizard, Angela Brisebarre, Camille Capel, Etienne Simon-Lorière, Vincent Enouf, Maud Vanpeene, Sylvie van der Werf,Dlab Dieppe                                                                                                                                                                                                                                                                                                                                                                                                                                                                                                                                                                                                                                                                                                                                                                                                                                 |
| EPI_ISL_954093                                                                                                                                                                                                                                                                                                                                                                                                                                                                                                                                                                 | Labo Analyses Med                                                                                                                                                                                                                                                                                                                                                                                                                                                                             | National Reference Center for Viruses of Respiratory Infections, Institut Pasteur, Paris                                                                               | Marion Barbet, Sylvie Behillil, Méline Bizard, Angela Brisebarre, Camille Capel, Etienne Simon-Lorière, Vincent Enouf, Maud Vanpeene, Sylvie van der Werf,Holstein Anne                                                                                                                                                                                                                                                                                                                                                                                                                                                                                                                                                                                                                                                                                                                                                                                                                               |
| EPI_ISL_954094, EPI_ISL_954097, EPI_ISL_954098, EPI_ISL_954099, EPI_ISL_954100, EPI_ISL_954101, EPI_ISL_954102                                                                                                                                                                                                                                                                                                                                                                                                                                                                 | Outre Mer                                                                                                                                                                                                                                                                                                                                                                                                                                                                                     | National Reference Center for Viruses of Respiratory Infections, Institut Pasteur, Paris                                                                               | Marion Barbet, Sylvie Behillil, Méline Bizard, Angela Brisebarre, Camille Capel, Etienne Simon-Lorière, Vincent Enouf, Maud Vanpeene, Sylvie van der Werf,Rousset Dominique                                                                                                                                                                                                                                                                                                                                                                                                                                                                                                                                                                                                                                                                                                                                                                                                                           |
| EPI_ISL_954103, EPI_ISL_954104                                                                                                                                                                                                                                                                                                                                                                                                                                                                                                                                                 | Hopital                                                                                                                                                                                                                                                                                                                                                                                                                                                                                       | National Reference Center for Viruses of Respiratory Infections, Institut Pasteur, Paris                                                                               | Marion Barbet, Sylvie Behillil, Méline Bizard, Angela Brisebarre, Camille Capel, Etienne Simon-Lorière, Vincent Enouf, Maud Vanpeene, Sylvie van der Werf,Raulin Olivia                                                                                                                                                                                                                                                                                                                                                                                                                                                                                                                                                                                                                                                                                                                                                                                                                               |
| EPI_ISL_954106, EPI_ISL_954107                                                                                                                                                                                                                                                                                                                                                                                                                                                                                                                                                 | Hopital                                                                                                                                                                                                                                                                                                                                                                                                                                                                                       | National Reference Center for Viruses of Respiratory Infections, Institut Pasteur, Paris                                                                               | Marion Barbet, Sylvie Behillil, Méline Bizard, Angela Brisebarre, Camille Capel, Etienne Simon-Lorière, Vincent Enouf, Maud Vanpeene, Sylvie van der Werf,Lesimple Béatrice                                                                                                                                                                                                                                                                                                                                                                                                                                                                                                                                                                                                                                                                                                                                                                                                                           |
| EPI_ISL_954108, EPI_ISL_954109, EPI_ISL_954110, EPI_ISL_954111                                                                                                                                                                                                                                                                                                                                                                                                                                                                                                                 | Outre Mer                                                                                                                                                                                                                                                                                                                                                                                                                                                                                     | National Reference Center for Viruses of Respiratory Infections, Institut Pasteur, Paris                                                                               | Marion Barbet, Sylvie Behillil, Méline Bizard, Angela Brisebarre, Camille Capel, Etienne Simon-Lorière, Vincent Enouf, Maud Vanpeene, Sylvie van der Werf,Rousset Dominique                                                                                                                                                                                                                                                                                                                                                                                                                                                                                                                                                                                                                                                                                                                                                                                                                           |
| EPI_ISL_954112                                                                                                                                                                                                                                                                                                                                                                                                                                                                                                                                                                 | Hopital                                                                                                                                                                                                                                                                                                                                                                                                                                                                                       | National Reference Center for Viruses of Respiratory Infections, Institut Pasteur, Paris                                                                               | Marion Barbet, Sylvie Behillil, Méline Bizard, Angela Brisebarre, Camille Capel, Etienne Simon-Lorière, Vincent Enouf, Maud Vanpeene, Sylvie van der Werf,Lesimple Béatrice                                                                                                                                                                                                                                                                                                                                                                                                                                                                                                                                                                                                                                                                                                                                                                                                                           |
| EPI_ISL_954113, EPI_ISL_954115                                                                                                                                                                                                                                                                                                                                                                                                                                                                                                                                                 | Hopital                                                                                                                                                                                                                                                                                                                                                                                                                                                                                       | National Reference Center for Viruses of Respiratory Infections, Institut Pasteur, Paris                                                                               | Marion Barbet, Sylvie Behillil, Méline Bizard, Angela Brisebarre, Camille Capel, Etienne Simon-Lorière, Vincent Enouf, Maud Vanpeene, Sylvie van der Werf,Lagathu Gisèle                                                                                                                                                                                                                                                                                                                                                                                                                                                                                                                                                                                                                                                                                                                                                                                                                              |
| EPI_ISL_954116, EPI_ISL_954117, EPI_ISL_954118                                                                                                                                                                                                                                                                                                                                                                                                                                                                                                                                 | Outre Mer                                                                                                                                                                                                                                                                                                                                                                                                                                                                                     | National Reference Center for Viruses of Respiratory Infections, Institut Pasteur, Paris                                                                               | Marion Barbet, Sylvie Behillil, Méline Bizard, Angela Brisebarre, Camille Capel, Etienne Simon-Lorière, Vincent Enouf, Maud Vanpeene, Sylvie van der Werf,Rousset Dominique                                                                                                                                                                                                                                                                                                                                                                                                                                                                                                                                                                                                                                                                                                                                                                                                                           |
| EPI_ISL_954119                                                                                                                                                                                                                                                                                                                                                                                                                                                                                                                                                                 | Labo Analyses Med                                                                                                                                                                                                                                                                                                                                                                                                                                                                             | National Reference Center for Viruses of Respiratory Infections, Institut Pasteur, Paris                                                                               | Marion Barbet, Sylvie Behillil, Méline Bizard, Angela Brisebarre, Camille Capel, Etienne Simon-Lorière, Vincent Enouf, Maud Vanpeene, Sylvie van der Werf,Takoudju Eve-Marie                                                                                                                                                                                                                                                                                                                                                                                                                                                                                                                                                                                                                                                                                                                                                                                                                          |
| EPI_ISL_954120                                                                                                                                                                                                                                                                                                                                                                                                                                                                                                                                                                 | Hopital                                                                                                                                                                                                                                                                                                                                                                                                                                                                                       | National Reference Center for Viruses of Respiratory Infections, Institut Pasteur, Paris                                                                               | Marion Barbet, Sylvie Behillil, Méline Bizard, Angela Brisebarre, Camille Capel, Etienne Simon-Lorière, Vincent Enouf, Maud Vanpeene, Sylvie van der Werf,Lagathu Gisèle                                                                                                                                                                                                                                                                                                                                                                                                                                                                                                                                                                                                                                                                                                                                                                                                                              |
| EPI_ISL_954121, EPI_ISL_954124                                                                                                                                                                                                                                                                                                                                                                                                                                                                                                                                                 | Labo Analyses Med                                                                                                                                                                                                                                                                                                                                                                                                                                                                             | National Reference Center for Viruses of Respiratory Infections, Institut Pasteur, Paris                                                                               | Marion Barbet, Sylvie Behillil, Méline Bizard, Angela Brisebarre, Camille Capel, Etienne Simon-Lorière, Vincent Enouf, Maud Vanpeene, Sylvie van der Werf,Takoudju Eve-Marie                                                                                                                                                                                                                                                                                                                                                                                                                                                                                                                                                                                                                                                                                                                                                                                                                          |
| EPI_ISL_954126                                                                                                                                                                                                                                                                                                                                                                                                                                                                                                                                                                 | Hopital                                                                                                                                                                                                                                                                                                                                                                                                                                                                                       | National Reference Center for Viruses of Respiratory Infections, Institut Pasteur, Paris                                                                               | Marion Barbet, Sylvie Behillil, Méline Bizard, Angela Brisebarre, Camille Capel, Etienne Simon-Lorière, Vincent Enouf, Maud Vanpeene, Sylvie van der Werf,Lesimple Béatrice                                                                                                                                                                                                                                                                                                                                                                                                                                                                                                                                                                                                                                                                                                                                                                                                                           |
| EPI_ISL_954144, EPI_ISL_954145, EPI_ISL_954146, EPI_ISL_954147, EPI_ISL_954148, EPI_ISL_954149, EPI_ISL_954150, EPI_ISL_954151, EPI_ISL_954152, EPI_ISL_954154, EPI_ISL_954155, EPI_ISL_954156, EPI_ISL_954157, EPI_ISL_954158, EPI_ISL_954159, EPI_ISL_954160, EPI_ISL_954161, EPI_ISL_954162, EPI_ISL_954163, EPI_ISL_954164, EPI_ISL_954165, EPI_ISL_954166, EPI_ISL_954167, EPI_ISL_954168, EPI_ISL_954169, EPI_ISL_954170, EPI_ISL_954171, EPI_ISL_954172, EPI_ISL_954174, EPI_ISL_954175, EPI_ISL_954176, EPI_ISL_954177, EPI_ISL_954180, EPI_ISL_954181, EPI_ISL_954182 |                                                                                                                                                                                                                                                                                                                                                                                                                                                                                               |                                                                                                                                                                        |                                                                                                                                                                                                                                                                                                                                                                                                                                                                                                                                                                                                                                                                                                                                                                                                                                                                                                                                                                                                       |
| see above                                                                                                                                                                                                                                                                                                                                                                                                                                                                                                                                                                      | Hospital Universitari Vall d'Hebron - Vall d'Hebron Institut de Rererca                                                                                                                                                                                                                                                                                                                                                                                                                       | Hospital Universitari Vall d'Hebron                                                                                                                                    | Cristina Andrés, Maria Piñana, Josep F Abril, Damir Garcia-Cehic, Ariadna Rando, Juliana Esperalba, Maria Gema Codina, Carla Castillo, Maria Carmen Martin, Tomás Pumarola, Josep Quer, Andrés Antón                                                                                                                                                                                                                                                                                                                                                                                                                                                                                                                                                                                                                                                                                                                                                                                                  |
| EPI_ISL_954218, EPI_ISL_954219                                                                                                                                                                                                                                                                                                                                                                                                                                                                                                                                                 | 1.AO Universitaria 'S. Giovanni di Dio e Ruggi D'Aragona, Scuola Medica Salernitana' Hospital / 2.UOC di Virologia e Microbiologia, Università della Campania 'L. Vanvitelli' / 3.AO Universitaria 'Federico II' Napoli Hospital / 4.AORN 'San Giuseppe Moscati' Avellino Hospital / 5.AO 'San Pio - presidio G. Rummo' Benevento Hospital / 6.AO 'Sant'Anna e San Sebastiano' Caserta Hospital / 7.PO 'Maria Santissima Addolorata' Eboli Hospital / 8.Biogen Istituto di Ricerche Genetiche | 1. Genome Research Center for Health (CRGS) / 2. Laboratory of Molecular Medicine and Genomics(LMMGe) / 3. Center for Research in Pure and Applied Mathematics (CRMPA) | Giorgio Giurato, Francesca Rizzo, Alessandro Weisz, Gianluigi Franci, Giovanni Nassa, Pasquale Pagliano, Roberta Tarallo, Elena Alexandrova, Ylenia D'Agostino, Carlo Ferravante, Jessica Lamberti, Viola Melone, Domenico Memoli, Valeria Mirici Cappa, Domenico Palumbo, Giovanni Pecoraro, Assunta Sellitto, Oriana Strianese, Ilaria Terenzi, Giuseppe Fenza, Aniello Gentile, Antonello Saccomanno, Sonia Amabile, Teresa Rocco, Annamaria Salvati, Emilia Vaccaro, Massimiliano Galdiero, Michele Cennamo, Giuseppe Portella, Maria Grazia Foti, Mariarosaria Ingino, Maria Landi, Maurizio Fumi, Vincenzo Rocco, Rita Greco, Vittoria Letizia, Arnolfo Petruzzello, Maddalena Schioppa, Gregorio Goffredi, Francesca Marciano, Michele Caraglia, Alessia Cossu, Marianna Scrima, Edmondo Adorisio, Morena D'Avenia, Michela Iacobellis, Rosanna Piluscio, Giorgio Dirani, Vittorio Sambri, Simona Sempriani, Silvia Zanolì, Francesco Curcio, Stefania Marzinotto, Andreina Baj, Fausto Sessa. |
| EPI_ISL_954226, EPI_ISL_954298, EPI_ISL_954299, EPI_ISL_954300                                                                                                                                                                                                                                                                                                                                                                                                                                                                                                                 | MRC/UVRI & LSHTM Uganda Research Unit                                                                                                                                                                                                                                                                                                                                                                                                                                                         | Where sequence data have been generated and submitted to GISAID                                                                                                        | Matthew Cotten, Dan Lule Bugembe, My V.T. Phan, Isaac Sseeewanyana, Patrick Semanda, Susan Nabadda, Pontiano Kaleebu                                                                                                                                                                                                                                                                                                                                                                                                                                                                                                                                                                                                                                                                                                                                                                                                                                                                                  |
| EPI_ISL_954748                                                                                                                                                                                                                                                                                                                                                                                                                                                                                                                                                                 | National Institute of Laboratory Medicine and Referral Center                                                                                                                                                                                                                                                                                                                                                                                                                                 | Genomic Research Lab, BCSIR                                                                                                                                            | Md. Murshed Hasan Sarkar, Mohammad Samir Uzzaman, Eshrar Osman, Md. Ahashan Habib, Shahina Akter, Tanjina Akhtar Banu, Abu Sayeed Mohammad Mahmud, Barna Goswami, Iffat Jahan, Md. Saddam Hossain, Tasnim Nafisa, Md. Maruf Ahmed Molla, Mahmuda Yeasmin, Asish Kumar Ghosh, Arifa Akram, A.K.M.Shamsuzzaman, Md. Salim Khan                                                                                                                                                                                                                                                                                                                                                                                                                                                                                                                                                                                                                                                                          |
| EPI_ISL_954749                                                                                                                                                                                                                                                                                                                                                                                                                                                                                                                                                                 | National Institute of Laboratory Medicine and Referral Center                                                                                                                                                                                                                                                                                                                                                                                                                                 | Genomic Research Lab, BCSIR                                                                                                                                            | Barna Goswami, Mohammad Samir Uzzaman, Eshrar Osman, Md. Ahashan Habib, Shahina Akter,Tanjina Akhtar Banu, Abu Sayeed Mohammad Mahmud, Md. Murshed Hasan Sarkar, Iffat Jahan, Md. Saddam Hossain, Tasnim Nafisa, Md. Maruf Ahmed Molla, Mahmuda Yeasmin, Asish Kumar Ghosh, Arifa Akram, A. K. M. Shamsuzzaman, Md. Salim Khan                                                                                                                                                                                                                                                                                                                                                                                                                                                                                                                                                                                                                                                                        |
| EPI_ISL_954751                                                                                                                                                                                                                                                                                                                                                                                                                                                                                                                                                                 | National Institute of Laboratory Medicine and Referral Center                                                                                                                                                                                                                                                                                                                                                                                                                                 | Genomic Research Lab, BCSIR                                                                                                                                            | Iffat Jahan, Mohammad Samir Uzzaman, Eshrar Osman, Md. Ahashan Habib, Shahina Akter, Tanjina Akhtar Banu, Abu Sayeed Mohammad Mahmud, Md.                                                                                                                                                                                                                                                                                                                                                                                                                                                                                                                                                                                                                                                                                                                                                                                                                                                             |

|                                                                                                                                                                                                                                                                                                                                                                                                                                                                                                                                                                                                                                                                                                                                                                                                                                                                                                                                                                                                                |                                                               |                                                                                                            |                                                                                                                                                                                                                                                                                                                                 |
|----------------------------------------------------------------------------------------------------------------------------------------------------------------------------------------------------------------------------------------------------------------------------------------------------------------------------------------------------------------------------------------------------------------------------------------------------------------------------------------------------------------------------------------------------------------------------------------------------------------------------------------------------------------------------------------------------------------------------------------------------------------------------------------------------------------------------------------------------------------------------------------------------------------------------------------------------------------------------------------------------------------|---------------------------------------------------------------|------------------------------------------------------------------------------------------------------------|---------------------------------------------------------------------------------------------------------------------------------------------------------------------------------------------------------------------------------------------------------------------------------------------------------------------------------|
|                                                                                                                                                                                                                                                                                                                                                                                                                                                                                                                                                                                                                                                                                                                                                                                                                                                                                                                                                                                                                |                                                               |                                                                                                            | Murshed Hasan Sarkar, Barna Goswami, Md. Saddam Hossain, Tasnim Nafisa, Md. Maruf Ahmed Molla, Mahmuda Yeasmin, Asish Kumar Ghosh, Arifa Akram, A. K. M. Shamsuzzaman, Md. Salim Khan                                                                                                                                           |
| EPI_ISL_954754                                                                                                                                                                                                                                                                                                                                                                                                                                                                                                                                                                                                                                                                                                                                                                                                                                                                                                                                                                                                 | City of Milwaukee Health Department Laboratory                | City of Milwaukee Health Department Laboratory                                                             | Sanjib Bhattacharyya                                                                                                                                                                                                                                                                                                            |
| EPI_ISL_954775                                                                                                                                                                                                                                                                                                                                                                                                                                                                                                                                                                                                                                                                                                                                                                                                                                                                                                                                                                                                 | AZDelta                                                       | AZDelta                                                                                                    | Geert Martens; Dieter De Smet                                                                                                                                                                                                                                                                                                   |
| EPI_ISL_954776                                                                                                                                                                                                                                                                                                                                                                                                                                                                                                                                                                                                                                                                                                                                                                                                                                                                                                                                                                                                 | National Institute of Laboratory Medicine and Referral Center | Genomic Research Lab, BCSIR                                                                                | Shahina Akter, Mohammad Samir Uzzaman, Eshrar Osman, Md. Ahashan Habib, Tanjina Akhtar Banu, Abu Sayeed Mohammad Mahmud, Md. Murshed Hasan Sarkar, Barna Goswami, Iffat Jahan, Md. Saddam Hossain, Tasnim Nafisa, Md. Maruf Ahmed Molla, Mahmuda Yeasmin, Asish Kumar Ghosh, Arifa Akram, A. K. M. Shamsuzzaman, Md. Salim Khan |
| EPI_ISL_954778                                                                                                                                                                                                                                                                                                                                                                                                                                                                                                                                                                                                                                                                                                                                                                                                                                                                                                                                                                                                 | AZDelta                                                       | AZDelta                                                                                                    | Geert Martens; Dieter De Smet                                                                                                                                                                                                                                                                                                   |
| EPI_ISL_954780                                                                                                                                                                                                                                                                                                                                                                                                                                                                                                                                                                                                                                                                                                                                                                                                                                                                                                                                                                                                 | COMPLEJO HOSPITALARIO XERAL-CALDE                             | Instituto de Salud Carlos III                                                                              | Iglesias-Caballero, M. Camarero, S. Sandoñis, V. Vázquez, S. Pozo, F. Casas, I. Jiménez, P. Zaballos, A. Monzón, S. Varona, S. Cuesta, I. Alonso, P.                                                                                                                                                                            |
| EPI_ISL_954806                                                                                                                                                                                                                                                                                                                                                                                                                                                                                                                                                                                                                                                                                                                                                                                                                                                                                                                                                                                                 | Gerencia de Asistencia Sanitaria de Soria                     | Instituto de Salud Carlos III                                                                              | Iglesias-Caballero, M. Camarero, S. Sandoñis, V. Vázquez, S. Pozo, F. Casas, I. Jiménez, P. Zaballos, A. Monzón, S. Varona, S. Cuesta, I. Aldea, C.                                                                                                                                                                             |
| EPI_ISL_954807, EPI_ISL_954808                                                                                                                                                                                                                                                                                                                                                                                                                                                                                                                                                                                                                                                                                                                                                                                                                                                                                                                                                                                 | Complejo Hospitalario Universitario La Coruña                 | Instituto de Salud Carlos III                                                                              | Iglesias-Caballero, M. Camarero, S. Sandoñis, V. Vázquez, S. Pozo, F. Casas, I. Jiménez, P. Zaballos, A. Monzón, S. Varona, S. Cuesta, I. Peña, F.                                                                                                                                                                              |
| EPI_ISL_954814, EPI_ISL_954816, EPI_ISL_954817                                                                                                                                                                                                                                                                                                                                                                                                                                                                                                                                                                                                                                                                                                                                                                                                                                                                                                                                                                 | AZDelta                                                       | AZDelta                                                                                                    | Geert Martens; Dieter De Smet                                                                                                                                                                                                                                                                                                   |
| EPI_ISL_954860, EPI_ISL_954863, EPI_ISL_954887, EPI_ISL_954888, EPI_ISL_954889, EPI_ISL_954890, EPI_ISL_954891, EPI_ISL_954896, EPI_ISL_954897, EPI_ISL_954898, EPI_ISL_954899, EPI_ISL_954900, EPI_ISL_954901, EPI_ISL_954903, EPI_ISL_954904, EPI_ISL_954933, EPI_ISL_954935, EPI_ISL_954936, EPI_ISL_954937, EPI_ISL_954938, EPI_ISL_954939, EPI_ISL_954940, EPI_ISL_954941, EPI_ISL_954942                                                                                                                                                                                                                                                                                                                                                                                                                                                                                                                                                                                                                 |                                                               |                                                                                                            |                                                                                                                                                                                                                                                                                                                                 |
| see above                                                                                                                                                                                                                                                                                                                                                                                                                                                                                                                                                                                                                                                                                                                                                                                                                                                                                                                                                                                                      | Colorado Department of Public Health and Environment          | Colorado Department of Puplic Health and Environment                                                       | Laura Bankers, Molly C. Hetherington-Rauth, Diana Ir, Shannon Ely, Shannon R. Matzinger, Sarah Elizabeth Totten, Emily A. Travanty                                                                                                                                                                                              |
| EPI_ISL_954943                                                                                                                                                                                                                                                                                                                                                                                                                                                                                                                                                                                                                                                                                                                                                                                                                                                                                                                                                                                                 | Laboratory of Virology and Molecular Diagnostics              | Institute of Public Health of Republic of North Macedonia Laboratory of Virology and Molecular Diagnostics | M. Kuzmanovska, G. Boshevsk                                                                                                                                                                                                                                                                                                     |
| EPI_ISL_954944, EPI_ISL_954948, EPI_ISL_954949, EPI_ISL_954950, EPI_ISL_954951, EPI_ISL_954952, EPI_ISL_954956, EPI_ISL_954957, EPI_ISL_954960, EPI_ISL_954961, EPI_ISL_954964, EPI_ISL_954967, EPI_ISL_954968, EPI_ISL_954972, EPI_ISL_954973, EPI_ISL_954977, EPI_ISL_954990, EPI_ISL_954991, EPI_ISL_954993, EPI_ISL_954995, EPI_ISL_954997, EPI_ISL_955000, EPI_ISL_955001, EPI_ISL_955003, EPI_ISL_955004, EPI_ISL_955005, EPI_ISL_955006, EPI_ISL_955007, EPI_ISL_955008, EPI_ISL_955009, EPI_ISL_955010, EPI_ISL_955011, EPI_ISL_955014, EPI_ISL_955015, EPI_ISL_955019, EPI_ISL_955023, EPI_ISL_955025, EPI_ISL_955026, EPI_ISL_955029, EPI_ISL_955032, EPI_ISL_955033, EPI_ISL_955034, EPI_ISL_955035, EPI_ISL_955037, EPI_ISL_955040, EPI_ISL_955041, EPI_ISL_955042, EPI_ISL_955043, EPI_ISL_955044, EPI_ISL_955046, EPI_ISL_955047, EPI_ISL_955048, EPI_ISL_955049, EPI_ISL_955050, EPI_ISL_955051, EPI_ISL_955052, EPI_ISL_955054, EPI_ISL_955055, EPI_ISL_955056, EPI_ISL_955058, EPI_ISL_955060 |                                                               |                                                                                                            |                                                                                                                                                                                                                                                                                                                                 |
| see above                                                                                                                                                                                                                                                                                                                                                                                                                                                                                                                                                                                                                                                                                                                                                                                                                                                                                                                                                                                                      | Colorado Department of Public Health and Environment          | Colorado Department of Puplic Health and Environment                                                       | Laura Bankers, Molly C. Hetherington-Rauth, Diana Ir, Shannon Ely, Shannon R. Matzinger, Sarah Elizabeth Totten, Emily A. Travanty                                                                                                                                                                                              |
| EPI_ISL_955061                                                                                                                                                                                                                                                                                                                                                                                                                                                                                                                                                                                                                                                                                                                                                                                                                                                                                                                                                                                                 | Hopital                                                       | National Reference Center for Viruses of Respiratory Infections, Institut Pasteur, Paris                   | Marion Barbet, Sylvie Behillil, Méline Bizard, Angela Brisebarre, Camille Capel, Etienne Simon-Lorière, Vincent Enouf, Maud Vanpeene, Sylvie van der Werf, Fourgeaud Jacques                                                                                                                                                    |
| EPI_ISL_955062, EPI_ISL_955063                                                                                                                                                                                                                                                                                                                                                                                                                                                                                                                                                                                                                                                                                                                                                                                                                                                                                                                                                                                 | Labo analyses Med                                             | National Reference Center for Viruses of Respiratory Infections, Institut Pasteur, Paris                   | Marion Barbet, Sylvie Behillil, Méline Bizard, Angela Brisebarre, Camille Capel, Etienne Simon-Lorière, Vincent Enouf, Maud Vanpeene, Sylvie van der Werf, Potiron GréGoire                                                                                                                                                     |
| EPI_ISL_955064                                                                                                                                                                                                                                                                                                                                                                                                                                                                                                                                                                                                                                                                                                                                                                                                                                                                                                                                                                                                 | Hopital                                                       | National Reference Center for Viruses of Respiratory Infections, Institut Pasteur, Paris                   | Marion Barbet, Sylvie Behillil, Méline Bizard, Angela Brisebarre, Camille Capel, Etienne Simon-Lorière, Vincent Enouf, Maud Vanpeene, Sylvie van der Werf, Guinoiseau Thibault                                                                                                                                                  |
| EPI_ISL_955065                                                                                                                                                                                                                                                                                                                                                                                                                                                                                                                                                                                                                                                                                                                                                                                                                                                                                                                                                                                                 | Hopital                                                       | National Reference Center for Viruses of Respiratory Infections, Institut Pasteur, Paris                   | Marion Barbet, Sylvie Behillil, Méline Bizard, Angela Brisebarre, Camille Capel, Etienne Simon-Lorière, Vincent Enouf, Maud Vanpeene, Sylvie van der Werf, Fourgeaud Jacques                                                                                                                                                    |
| EPI_ISL_955066, EPI_ISL_955067                                                                                                                                                                                                                                                                                                                                                                                                                                                                                                                                                                                                                                                                                                                                                                                                                                                                                                                                                                                 | Labo analyses med                                             | National Reference Center for Viruses of Respiratory Infections, Institut Pasteur, Paris                   | Marion Barbet, Sylvie Behillil, Méline Bizard, Angela Brisebarre, Camille Capel, Etienne Simon-Lorière, Vincent Enouf, Maud Vanpeene, Sylvie van der Werf, Amzalag Jonas                                                                                                                                                        |
| EPI_ISL_955070, EPI_ISL_955071, EPI_ISL_955072                                                                                                                                                                                                                                                                                                                                                                                                                                                                                                                                                                                                                                                                                                                                                                                                                                                                                                                                                                 | Labo analyses Med                                             | National Reference Center for Viruses of Respiratory Infections, Institut Pasteur, Paris                   | Marion Barbet, Sylvie Behillil, Méline Bizard, Angela Brisebarre, Camille Capel, Etienne Simon-Lorière, Vincent Enouf, Maud Vanpeene, Sylvie van der Werf, Potiron GréGoire                                                                                                                                                     |
| EPI_ISL_955073                                                                                                                                                                                                                                                                                                                                                                                                                                                                                                                                                                                                                                                                                                                                                                                                                                                                                                                                                                                                 | Labo Analyses Med                                             | National Reference Center for Viruses of Respiratory Infections, Institut Pasteur, Paris                   | Marion Barbet, Sylvie Behillil, Méline Bizard, Angela Brisebarre, Camille Capel, Etienne Simon-Lorière, Vincent Enouf, Maud Vanpeene, Sylvie van der Werf, Jacques Alexandra                                                                                                                                                    |
| EPI_ISL_955078                                                                                                                                                                                                                                                                                                                                                                                                                                                                                                                                                                                                                                                                                                                                                                                                                                                                                                                                                                                                 | Hopital                                                       | National Reference Center for Viruses of Respiratory Infections, Institut Pasteur, Paris                   | Marion Barbet, Sylvie Behillil, Méline Bizard, Angela Brisebarre, Camille Capel, Etienne Simon-Lorière, Vincent Enouf, Maud Vanpeene, Sylvie van der Werf, Fourgeaud Jacques                                                                                                                                                    |
| EPI_ISL_955079                                                                                                                                                                                                                                                                                                                                                                                                                                                                                                                                                                                                                                                                                                                                                                                                                                                                                                                                                                                                 | Labo analyses Med                                             | National Reference Center for Viruses of Respiratory Infections, Institut Pasteur, Paris                   | Marion Barbet, Sylvie Behillil, Méline Bizard, Angela Brisebarre, Camille Capel, Etienne Simon-Lorière, Vincent Enouf, Maud Vanpeene, Sylvie van der Werf, Potiron GréGoire                                                                                                                                                     |
| EPI_ISL_955081                                                                                                                                                                                                                                                                                                                                                                                                                                                                                                                                                                                                                                                                                                                                                                                                                                                                                                                                                                                                 | Hopital                                                       | National Reference Center for Viruses of Respiratory Infections, Institut Pasteur, Paris                   | Marion Barbet, Sylvie Behillil, Méline Bizard, Angela Brisebarre, Camille Capel, Etienne Simon-Lorière, Vincent Enouf, Maud Vanpeene, Sylvie van der Werf, Guinoiseau Thibault                                                                                                                                                  |
| EPI_ISL_955082                                                                                                                                                                                                                                                                                                                                                                                                                                                                                                                                                                                                                                                                                                                                                                                                                                                                                                                                                                                                 | Labo analyses Med                                             | National Reference Center for Viruses of Respiratory Infections, Institut Pasteur, Paris                   | Marion Barbet, Sylvie Behillil, Méline Bizard, Angela Brisebarre, Camille Capel, Etienne Simon-Lorière, Vincent Enouf, Maud Vanpeene, Sylvie van der Werf, Potiron GréGoire                                                                                                                                                     |
| EPI_ISL_955083, EPI_ISL_955084                                                                                                                                                                                                                                                                                                                                                                                                                                                                                                                                                                                                                                                                                                                                                                                                                                                                                                                                                                                 | Hopital                                                       | National Reference Center for Viruses of Respiratory Infections, Institut Pasteur, Paris                   | Marion Barbet, Sylvie Behillil, Méline Bizard, Angela Brisebarre, Camille Capel, Etienne Simon-Lorière, Vincent Enouf, Maud Vanpeene, Sylvie van der Werf, Fourgeaud Jacques                                                                                                                                                    |
| EPI_ISL_955085                                                                                                                                                                                                                                                                                                                                                                                                                                                                                                                                                                                                                                                                                                                                                                                                                                                                                                                                                                                                 | Hopital                                                       | National Reference Center for Viruses of Respiratory Infections, Institut Pasteur, Paris                   | Marion Barbet, Sylvie Behillil, Méline Bizard, Angela Brisebarre, Camille Capel, Etienne Simon-Lorière, Vincent Enouf, Maud Vanpeene, Sylvie van der Werf, Joly Isabelle                                                                                                                                                        |
| EPI_ISL_955087, EPI_ISL_955088, EPI_ISL_955089, EPI_ISL_955090, EPI_ISL_955092, EPI_ISL_955093                                                                                                                                                                                                                                                                                                                                                                                                                                                                                                                                                                                                                                                                                                                                                                                                                                                                                                                 | Labo analyses Med                                             | National Reference Center for Viruses of Respiratory Infections, Institut Pasteur, Paris                   | Marion Barbet, Sylvie Behillil, Méline Bizard, Angela Brisebarre, Camille Capel, Etienne Simon-Lorière, Vincent Enouf, Maud Vanpeene, Sylvie van der Werf, Potiron GréGoire                                                                                                                                                     |
| EPI_ISL_955095                                                                                                                                                                                                                                                                                                                                                                                                                                                                                                                                                                                                                                                                                                                                                                                                                                                                                                                                                                                                 | Hopital                                                       | National Reference Center for Viruses of Respiratory Infections, Institut Pasteur, Paris                   | Marion Barbet, Sylvie Behillil, Méline Bizard, Angela Brisebarre, Camille Capel, Etienne Simon-Lorière, Vincent Enouf, Maud Vanpeene, Sylvie van der Werf, Joly Isabelle                                                                                                                                                        |
| EPI_ISL_955097, EPI_ISL_955099                                                                                                                                                                                                                                                                                                                                                                                                                                                                                                                                                                                                                                                                                                                                                                                                                                                                                                                                                                                 | Hopital                                                       | National Reference Center for Viruses of Respiratory Infections, Institut Pasteur, Paris                   | Marion Barbet, Sylvie Behillil, Méline Bizard, Angela Brisebarre, Camille Capel, Etienne Simon-Lorière, Vincent Enouf, Maud Vanpeene, Sylvie van der Werf, Guinoiseau Thibault                                                                                                                                                  |
| EPI_ISL_955101                                                                                                                                                                                                                                                                                                                                                                                                                                                                                                                                                                                                                                                                                                                                                                                                                                                                                                                                                                                                 | National Institute of Laboratory Medicine and Referral Center | Genomic Research Lab, BCSIR                                                                                | Tanjina Akhtar Banu, Mohammad Samir Uzzaman, Eshrar Osman, Md. Ahashan Habib, Shahina Akter, Abu Sayeed Mohammad Mahmud, Md. Murshed Hasan Sarkar, Barna Goswami, Iffat Jahan, Md. Saddam Hossain, Tasnim Nafisa, Md. Maruf Ahmed Molla, Mahmuda Yeasmin, Asish Kumar Ghosh, Arifa Akram, A. K. M. Shamsuzzaman, Md. Salim Khan |
| EPI_ISL_955103                                                                                                                                                                                                                                                                                                                                                                                                                                                                                                                                                                                                                                                                                                                                                                                                                                                                                                                                                                                                 | National Institute of Laboratory Medicine and Referral Center | Genomic Research Lab, BCSIR                                                                                | Md. Ahashan Habib, Mohammad Samir Uzzaman, Eshrar Osman, Shahina Akter, Tanjina Akhtar Banu, Abu Sayeed Mohammad Mahmud, Md. Murshed Hasan Sarkar, Barna Goswami, Iffat Jahan, Md. Saddam Hossain, Tasnim Nafisa, Md. Maruf Ahmed Molla, Mahmuda Yeasmin, Asish Kumar Ghosh, Arifa Akram, A. K. M. Shamsuzzaman, Md. Salim Khan |
| EPI_ISL_955112, EPI_ISL_955113, EPI_ISL_955116, EPI_ISL_955118, EPI_ISL_955119, EPI_ISL_955120, EPI_ISL_955121, EPI_ISL_955122, EPI_ISL_955124                                                                                                                                                                                                                                                                                                                                                                                                                                                                                                                                                                                                                                                                                                                                                                                                                                                                 | Maryland Public Health Laboratory                             | Maryland Public Health Laboratory                                                                          | Maryland Department of Health Laboratories Administration                                                                                                                                                                                                                                                                       |
| EPI_ISL_955143, EPI_ISL_955145, EPI_ISL_955149                                                                                                                                                                                                                                                                                                                                                                                                                                                                                                                                                                                                                                                                                                                                                                                                                                                                                                                                                                 | Platform BIS UZA/UAntwerpen                                   | UAntwerp, Laboratory of Medical Microbiology                                                               | Basil Britto Xavier, Jasmine Coppens, Marie Le Mercier, Christine Lammens, Veerle Matheeußen, Herman Goossens                                                                                                                                                                                                                   |
| EPI_ISL_955183                                                                                                                                                                                                                                                                                                                                                                                                                                                                                                                                                                                                                                                                                                                                                                                                                                                                                                                                                                                                 | Labo Analyses Med                                             | National Reference Center for Viruses of Respiratory Infections, Institut Pasteur, Paris                   | Marion Barbet, Sylvie Behillil, Méline Bizard, Angela Brisebarre, Camille Capel, Etienne Simon-Lorière, Vincent Enouf, Maud Vanpeene, Sylvie van der Werf, Le Berre (D) David                                                                                                                                                   |

|                                                                                                                                                                                                                                                                                                                                                                                                                                                                                                                                                                                                                                                                                                                                                                                                                                                                                                                                                                                                                                                                                                                                                                                                                                                                                                                                                                                                                                                                                                                                                                                                                                                                                                                                                                                 |                                                                                                                                          |                                                                                                                         |                                                                                                                                                                                                       |
|---------------------------------------------------------------------------------------------------------------------------------------------------------------------------------------------------------------------------------------------------------------------------------------------------------------------------------------------------------------------------------------------------------------------------------------------------------------------------------------------------------------------------------------------------------------------------------------------------------------------------------------------------------------------------------------------------------------------------------------------------------------------------------------------------------------------------------------------------------------------------------------------------------------------------------------------------------------------------------------------------------------------------------------------------------------------------------------------------------------------------------------------------------------------------------------------------------------------------------------------------------------------------------------------------------------------------------------------------------------------------------------------------------------------------------------------------------------------------------------------------------------------------------------------------------------------------------------------------------------------------------------------------------------------------------------------------------------------------------------------------------------------------------|------------------------------------------------------------------------------------------------------------------------------------------|-------------------------------------------------------------------------------------------------------------------------|-------------------------------------------------------------------------------------------------------------------------------------------------------------------------------------------------------|
| EPI_ISL_955184                                                                                                                                                                                                                                                                                                                                                                                                                                                                                                                                                                                                                                                                                                                                                                                                                                                                                                                                                                                                                                                                                                                                                                                                                                                                                                                                                                                                                                                                                                                                                                                                                                                                                                                                                                  | University of Sarajevo, Veterinary Faculty, Laboratory for Molecular Diagnostic and Research Laboratory                                  | University of Sarajevo, Veterinary Faculty, Laboratory for Molecular Diagnostic and Research Laboratory                 | Goleti Š., Goleti T., Softi A., Ali-Šeho A., Nicevi M., Hodži A., Terzi I., Šabi E., Jaži A.                                                                                                          |
| EPI_ISL_955187                                                                                                                                                                                                                                                                                                                                                                                                                                                                                                                                                                                                                                                                                                                                                                                                                                                                                                                                                                                                                                                                                                                                                                                                                                                                                                                                                                                                                                                                                                                                                                                                                                                                                                                                                                  | University of Sarajevo, Veterinary Faculty, Laboratory for Molecular Diagnostic and Research Laboratory                                  | University of Sarajevo, Veterinary Faculty, Laboratory for Molecular Diagnostic and Research Laboratory                 | Goleti Š., Goleti T., Ali-Šeho A., Softi A., Hodži A., Terzi I., Šabi E., Jaži A., Nicevi M.                                                                                                          |
| EPI_ISL_955188                                                                                                                                                                                                                                                                                                                                                                                                                                                                                                                                                                                                                                                                                                                                                                                                                                                                                                                                                                                                                                                                                                                                                                                                                                                                                                                                                                                                                                                                                                                                                                                                                                                                                                                                                                  | University of Sarajevo, Veterinary Faculty, Laboratory for Molecular Diagnostic and Research Laboratory                                  | University of Sarajevo, Veterinary Faculty, Laboratory for Molecular Diagnostic and Research Laboratory                 | Goleti Š., Goleti T., Ali-Šeho A., Softi A., Jaži A., Terzi I., Nicevi M., Šabi E., Hodži A.                                                                                                          |
| EPI_ISL_955210                                                                                                                                                                                                                                                                                                                                                                                                                                                                                                                                                                                                                                                                                                                                                                                                                                                                                                                                                                                                                                                                                                                                                                                                                                                                                                                                                                                                                                                                                                                                                                                                                                                                                                                                                                  | University of Sarajevo, Veterinary Faculty, Laboratory for Molecular Diagnostic and Research Laboratory                                  | University of Sarajevo, Veterinary Faculty, Laboratory for Molecular Diagnostic and Research Laboratory                 | Goleti Š., Goleti T., Ali-Šeho A., Softi A., Hodži A., Terzi I., Jaži A., Nicevi M., Šabi E.                                                                                                          |
| EPI_ISL_955211                                                                                                                                                                                                                                                                                                                                                                                                                                                                                                                                                                                                                                                                                                                                                                                                                                                                                                                                                                                                                                                                                                                                                                                                                                                                                                                                                                                                                                                                                                                                                                                                                                                                                                                                                                  | University of Sarajevo, Veterinary Faculty, Laboratory for Molecular Diagnostic and Research Laboratory                                  | University of Sarajevo, Veterinary Faculty, Laboratory for Molecular Diagnostic and Research Laboratory                 | Goleti Š., Goleti T., Ali-Šeho A., Softi A., Jaži A., Terzi I., Šabi E., Nicevi M., Hodži A.                                                                                                          |
| EPI_ISL_955218, EPI_ISL_955219, EPI_ISL_955223, EPI_ISL_955224, EPI_ISL_955228                                                                                                                                                                                                                                                                                                                                                                                                                                                                                                                                                                                                                                                                                                                                                                                                                                                                                                                                                                                                                                                                                                                                                                                                                                                                                                                                                                                                                                                                                                                                                                                                                                                                                                  | Indiana Animal Disease Diagnostic Laboratory                                                                                             | Carpi Laboratory - Purdue University                                                                                    | Jack Dorman, Ilinca Ciubotariu, Lev Gorenstein, Abebe A Fola, G Kenitra Hendrix, Rebecca P Wilkes, Giovanna Carpi                                                                                     |
| EPI_ISL_955291                                                                                                                                                                                                                                                                                                                                                                                                                                                                                                                                                                                                                                                                                                                                                                                                                                                                                                                                                                                                                                                                                                                                                                                                                                                                                                                                                                                                                                                                                                                                                                                                                                                                                                                                                                  | IL Dept. of Public Health Springfield Laboratory                                                                                         | Pathogen Discovery, Respiratory Viruses Branch, Division of Viral Diseases, Centers for Disease Control and Prevention  | Ying Tao, Jing Zhang, Yan Li, Krista Queen, Anna Uehara, Peter Cook, Clinton R. Paden, Haibin Wang, Suxiang Tong                                                                                      |
| EPI_ISL_955294, EPI_ISL_955295, EPI_ISL_955296                                                                                                                                                                                                                                                                                                                                                                                                                                                                                                                                                                                                                                                                                                                                                                                                                                                                                                                                                                                                                                                                                                                                                                                                                                                                                                                                                                                                                                                                                                                                                                                                                                                                                                                                  | Clinical Pathology Lab                                                                                                                   | Pathogen Discovery, Respiratory Viruses Branch, Division of Viral Diseases, Centers for Disease Control and Prevention  | Ying Tao, Jing Zhang, Yan Li, Krista Queen, Anna Uehara, Peter Cook, Clinton R. Paden, Haibin Wang, Suxiang Tong                                                                                      |
| EPI_ISL_955308                                                                                                                                                                                                                                                                                                                                                                                                                                                                                                                                                                                                                                                                                                                                                                                                                                                                                                                                                                                                                                                                                                                                                                                                                                                                                                                                                                                                                                                                                                                                                                                                                                                                                                                                                                  | OK Public Health Laboratory, Oklahoma State DOH                                                                                          | Pathogen Discovery, Respiratory Viruses Branch, Division of Viral Diseases, Centers for Disease Control and Prevention  | Ying Tao, Jing Zhang, Yan Li, Krista Queen, Anna Uehara, Peter Cook, Clinton R. Paden, Haibin Wang, Suxiang Tong                                                                                      |
| EPI_ISL_955310                                                                                                                                                                                                                                                                                                                                                                                                                                                                                                                                                                                                                                                                                                                                                                                                                                                                                                                                                                                                                                                                                                                                                                                                                                                                                                                                                                                                                                                                                                                                                                                                                                                                                                                                                                  | TN Division of Laboratory Services                                                                                                       | Pathogen Discovery, Respiratory Viruses Branch, Division of Viral Diseases, Centers for Disease Control and Prevention  | Ying Tao, Jing Zhang, Yan Li, Krista Queen, Anna Uehara, Peter Cook, Clinton R. Paden, Haibin Wang, Suxiang Tong                                                                                      |
| EPI_ISL_955312, EPI_ISL_955321                                                                                                                                                                                                                                                                                                                                                                                                                                                                                                                                                                                                                                                                                                                                                                                                                                                                                                                                                                                                                                                                                                                                                                                                                                                                                                                                                                                                                                                                                                                                                                                                                                                                                                                                                  | Clinical Pathology Lab                                                                                                                   | Pathogen Discovery, Respiratory Viruses Branch, Division of Viral Diseases, Centers for Disease Control and Prevention  | Ying Tao, Jing Zhang, Yan Li, Krista Queen, Anna Uehara, Peter Cook, Clinton R. Paden, Haibin Wang, Suxiang Tong                                                                                      |
| EPI_ISL_955328                                                                                                                                                                                                                                                                                                                                                                                                                                                                                                                                                                                                                                                                                                                                                                                                                                                                                                                                                                                                                                                                                                                                                                                                                                                                                                                                                                                                                                                                                                                                                                                                                                                                                                                                                                  | IL Dept. of Public Health Springfield Laboratory                                                                                         | Pathogen Discovery, Respiratory Viruses Branch, Division of Viral Diseases, Centers for Disease Control and Prevention  | Ying Tao, Jing Zhang, Yan Li, Krista Queen, Anna Uehara, Peter Cook, Clinton R. Paden, Haibin Wang, Suxiang Tong                                                                                      |
| EPI_ISL_955396, EPI_ISL_955407, EPI_ISL_955409, EPI_ISL_955413, EPI_ISL_955418, EPI_ISL_955425                                                                                                                                                                                                                                                                                                                                                                                                                                                                                                                                                                                                                                                                                                                                                                                                                                                                                                                                                                                                                                                                                                                                                                                                                                                                                                                                                                                                                                                                                                                                                                                                                                                                                  | Alameda County Public Health Lab                                                                                                         | Chan-Zuckerberg Biohub                                                                                                  | CZB Ciliahub Consortium                                                                                                                                                                               |
| EPI_ISL_955428, EPI_ISL_955434, EPI_ISL_955443, EPI_ISL_955445, EPI_ISL_955448, EPI_ISL_955454, EPI_ISL_955462, EPI_ISL_955463, EPI_ISL_955468, EPI_ISL_955480, EPI_ISL_955481, EPI_ISL_955483                                                                                                                                                                                                                                                                                                                                                                                                                                                                                                                                                                                                                                                                                                                                                                                                                                                                                                                                                                                                                                                                                                                                                                                                                                                                                                                                                                                                                                                                                                                                                                                  | see above                                                                                                                                | see above                                                                                                               | see above                                                                                                                                                                                             |
| EPI_ISL_955768, EPI_ISL_955770, EPI_ISL_955771                                                                                                                                                                                                                                                                                                                                                                                                                                                                                                                                                                                                                                                                                                                                                                                                                                                                                                                                                                                                                                                                                                                                                                                                                                                                                                                                                                                                                                                                                                                                                                                                                                                                                                                                  | Orange County Public Health Lab                                                                                                          | Chan-Zuckerberg Biohub                                                                                                  | CZB Ciliahub Consortium                                                                                                                                                                               |
| EPI_ISL_955778, EPI_ISL_955780, EPI_ISL_955783, EPI_ISL_955785, EPI_ISL_955788, EPI_ISL_955795, EPI_ISL_955796, EPI_ISL_955800, EPI_ISL_955801, EPI_ISL_955806, EPI_ISL_955819, EPI_ISL_955823, EPI_ISL_955825, EPI_ISL_955826, EPI_ISL_955838, EPI_ISL_955843, EPI_ISL_955850, EPI_ISL_955851, EPI_ISL_955857, EPI_ISL_955861, EPI_ISL_955864, EPI_ISL_955866, EPI_ISL_955875, EPI_ISL_955876, EPI_ISL_955877, EPI_ISL_955882, EPI_ISL_955890, EPI_ISL_955897, EPI_ISL_955899, EPI_ISL_955900, EPI_ISL_955901, EPI_ISL_955902                                                                                                                                                                                                                                                                                                                                                                                                                                                                                                                                                                                                                                                                                                                                                                                                                                                                                                                                                                                                                                                                                                                                                                                                                                                  | Humboldt County Public Health Laboratory                                                                                                 | Chan-Zuckerberg Biohub                                                                                                  | CZB Ciliahub Consortium                                                                                                                                                                               |
| see above                                                                                                                                                                                                                                                                                                                                                                                                                                                                                                                                                                                                                                                                                                                                                                                                                                                                                                                                                                                                                                                                                                                                                                                                                                                                                                                                                                                                                                                                                                                                                                                                                                                                                                                                                                       | University of Michigan Clinical Microbiology Laboratory                                                                                  | Lauring Lab, University of Michigan, Department of Microbiology and Immunology                                          | Valesano                                                                                                                                                                                              |
| EPI_ISL_955905                                                                                                                                                                                                                                                                                                                                                                                                                                                                                                                                                                                                                                                                                                                                                                                                                                                                                                                                                                                                                                                                                                                                                                                                                                                                                                                                                                                                                                                                                                                                                                                                                                                                                                                                                                  | Pamela Youde Nethersole Eastern Hospital                                                                                                 | Hong Kong Department of Health                                                                                          | Alan K.L. Tsang, Peter C.W. Yip, Edman T.K. Lam, Rickjason C.W. Chan, Dominic N.C. Tsang                                                                                                              |
| EPI_ISL_956272                                                                                                                                                                                                                                                                                                                                                                                                                                                                                                                                                                                                                                                                                                                                                                                                                                                                                                                                                                                                                                                                                                                                                                                                                                                                                                                                                                                                                                                                                                                                                                                                                                                                                                                                                                  | Thai Red Cross Emerging Infectious Diseases Health Science Centre, Chulalongkorn Hospital, Faculty of Medicine, Chulalongkorn University | Thai Red Cross Emerging Infectious Diseases Center and Faculty of Medicine, Chulalongkorn University                    | Rome Buathong, Sopon Iamsirithaworn, Sininat Petcharat, Yutthana Joyjinda, Weenassarin Ampoot, Apaporn Rodpan, Opass Putcharoen, Thiravat Hemachudha, Supaporn Wacharapluesadee                       |
| EPI_ISL_956275                                                                                                                                                                                                                                                                                                                                                                                                                                                                                                                                                                                                                                                                                                                                                                                                                                                                                                                                                                                                                                                                                                                                                                                                                                                                                                                                                                                                                                                                                                                                                                                                                                                                                                                                                                  | Thai Red Cross Emerging Infectious Diseases Health Science Centre, Chulalongkorn Hospital, Faculty of Medicine, Chulalongkorn University | Thai Red Cross Emerging Infectious Diseases Center and Faculty of Medicine, Chulalongkorn University                    | Ratima samorn, Panpit Suwangool, Sininat Petcharat, Yutthana Joyjinda, Weenassarin Ampoot, Apaporn Rodpan, Opass Putcharoen, Thiravat Hemachudha, Supaporn Wacharapluesadee                           |
| EPI_ISL_956280                                                                                                                                                                                                                                                                                                                                                                                                                                                                                                                                                                                                                                                                                                                                                                                                                                                                                                                                                                                                                                                                                                                                                                                                                                                                                                                                                                                                                                                                                                                                                                                                                                                                                                                                                                  | Institute of Tropical Disease                                                                                                            | Institute of Tropical Disease, Universitas Airlangga                                                                    | Rima R Prasetya, Krisnodi Rahardjo, Aldise M Nastri, Jezzy R Dewantari, Gatot Soegiarto, Laksmi Wulandari, Resti Yudhawati, Soetjipto, Yasuko Mori, Maria I Lusida, Kazufumi Shimizu                  |
| EPI_ISL_956281                                                                                                                                                                                                                                                                                                                                                                                                                                                                                                                                                                                                                                                                                                                                                                                                                                                                                                                                                                                                                                                                                                                                                                                                                                                                                                                                                                                                                                                                                                                                                                                                                                                                                                                                                                  | Siti Khodijah Hospital                                                                                                                   | Institute of Tropical Disease, Universitas Airlangga                                                                    | Maria I Lusida, Krisnodi Rahardjo, Aldise M Nastri, Jezzy R Dewantari, Rima R Prasetya, Muhammad Hamdan, Gatot Soegiarto, Laksmi Wulandari, Resti Yudhawati, Soetjipto, Yasuko Mori, Kazufumi Shimizu |
| EPI_ISL_956312                                                                                                                                                                                                                                                                                                                                                                                                                                                                                                                                                                                                                                                                                                                                                                                                                                                                                                                                                                                                                                                                                                                                                                                                                                                                                                                                                                                                                                                                                                                                                                                                                                                                                                                                                                  | Institute of Tropical Disease                                                                                                            | Institute of Tropical Disease, Universitas Airlangga                                                                    | Krisnodi Rahardjo, Aldise M Nastri, Jezzy R Dewantari, Rima R Prasetya, Gatot Soegiarto, Laksmi Wulandari, Resti Yudhawati, Yasuko Mori, Soetjipto, Kazufumi Shimizu, Maria I Lusida                  |
| EPI_ISL_956315                                                                                                                                                                                                                                                                                                                                                                                                                                                                                                                                                                                                                                                                                                                                                                                                                                                                                                                                                                                                                                                                                                                                                                                                                                                                                                                                                                                                                                                                                                                                                                                                                                                                                                                                                                  | Siti Khodijah Hospital                                                                                                                   | Institute of Tropical Disease, Universitas Airlangga                                                                    | Kazufumi Shimizu, Krisnodi Rahardjo, Aldise M Nastri, Jezzy R Dewantari, Rima R Prasetya, Muhammad Hamdan, Gatot Soegiarto, Laksmi Wulandari, Resti Yudhawati, Yasuko Mori, Soetjipto, Maria I Lusida |
| EPI_ISL_956327, EPI_ISL_956328, EPI_ISL_956329, EPI_ISL_956330, EPI_ISL_956331                                                                                                                                                                                                                                                                                                                                                                                                                                                                                                                                                                                                                                                                                                                                                                                                                                                                                                                                                                                                                                                                                                                                                                                                                                                                                                                                                                                                                                                                                                                                                                                                                                                                                                  | Laboratory Medicine                                                                                                                      | Department of Laboratory Medicine, Lin-Kou Chang Gung Memorial Hospital, Taoyuan, Taiwan                                | Kuo-Chien Tsao, Yu-Nong Gong, Shu-Li Yang, Yi-Chun Liu, Chung-Guei Huang, Mei-Jen Hsiao, Po-Wei Huang, Cheng-Ta Yang, Cheng-Hsun Chiu, Peng-Nien Huang, Kuo-Ming Lee, Guang-Wu Chen, Shin-Ru Shih     |
| EPI_ISL_956339                                                                                                                                                                                                                                                                                                                                                                                                                                                                                                                                                                                                                                                                                                                                                                                                                                                                                                                                                                                                                                                                                                                                                                                                                                                                                                                                                                                                                                                                                                                                                                                                                                                                                                                                                                  | University Hospitals Translational Laboratory (UHTL), University Hospitals                                                               | University Hospitals Translational Laboratory (UHTL), University Hospitals                                              | Sadri,N., Alouani,D. and Song,X.                                                                                                                                                                      |
| EPI_ISL_956360, EPI_ISL_956363, EPI_ISL_956364                                                                                                                                                                                                                                                                                                                                                                                                                                                                                                                                                                                                                                                                                                                                                                                                                                                                                                                                                                                                                                                                                                                                                                                                                                                                                                                                                                                                                                                                                                                                                                                                                                                                                                                                  | Houston Health Department, Disease Prevention and Control                                                                                | Houston Health Department, Disease Prevention and Control                                                               | Penn,R., Brown,P., Lara,A.                                                                                                                                                                            |
| EPI_ISL_956405                                                                                                                                                                                                                                                                                                                                                                                                                                                                                                                                                                                                                                                                                                                                                                                                                                                                                                                                                                                                                                                                                                                                                                                                                                                                                                                                                                                                                                                                                                                                                                                                                                                                                                                                                                  | General Hospital - Veles                                                                                                                 | Research Center for Genetic Engineering and Biotechnology "Georgi D. Efremov" , Macedonian Academy of Sciences and Arts | Aleksandar J. Dimovski, Dijana Plasheska-Karanfilska, Predrag Noveski, Gjorgji Bozinovski, Milena Jakimovska                                                                                          |
| EPI_ISL_956413, EPI_ISL_956416, EPI_ISL_956420                                                                                                                                                                                                                                                                                                                                                                                                                                                                                                                                                                                                                                                                                                                                                                                                                                                                                                                                                                                                                                                                                                                                                                                                                                                                                                                                                                                                                                                                                                                                                                                                                                                                                                                                  | Laboratory of Virology and Molecular Diagnostics                                                                                         | Institute of Public Health of Republic of North Macedonia Laboratory of Virology and Molecular Diagnostics              | Maja Kuzmanovska, Golubinka Boshevska                                                                                                                                                                 |
| EPI_ISL_956421                                                                                                                                                                                                                                                                                                                                                                                                                                                                                                                                                                                                                                                                                                                                                                                                                                                                                                                                                                                                                                                                                                                                                                                                                                                                                                                                                                                                                                                                                                                                                                                                                                                                                                                                                                  | General Hospital - Kumanovo                                                                                                              | Research Center for Genetic Engineering and Biotechnology "Georgi D. Efremov" , Macedonian Academy of Sciences and Arts | Aleksandar J. Dimovski, Dijana Plasheska-Karanfilska, Predrag Noveski, Gjorgji Bozinovski, Milena Jakimovska                                                                                          |
| EPI_ISL_956422, EPI_ISL_956424, EPI_ISL_956426, EPI_ISL_956427, EPI_ISL_956428, EPI_ISL_956429, EPI_ISL_956430, EPI_ISL_956432, EPI_ISL_956433, EPI_ISL_956434, EPI_ISL_956435, EPI_ISL_956438, EPI_ISL_956440, EPI_ISL_956443, EPI_ISL_956444, EPI_ISL_956445, EPI_ISL_956446, EPI_ISL_956447, EPI_ISL_956448, EPI_ISL_956450, EPI_ISL_956452, EPI_ISL_956453, EPI_ISL_956455, EPI_ISL_956456, EPI_ISL_956459, EPI_ISL_956460, EPI_ISL_956462, EPI_ISL_956463, EPI_ISL_956465, EPI_ISL_956466, EPI_ISL_956467, EPI_ISL_956468, EPI_ISL_956469, EPI_ISL_956470, EPI_ISL_956472, EPI_ISL_956473, EPI_ISL_956475, EPI_ISL_956476, EPI_ISL_956479, EPI_ISL_956480, EPI_ISL_956481, EPI_ISL_956482, EPI_ISL_956485, EPI_ISL_956486, EPI_ISL_956487, EPI_ISL_956488, EPI_ISL_956489, EPI_ISL_956491, EPI_ISL_956493, EPI_ISL_956495, EPI_ISL_956497, EPI_ISL_956498, EPI_ISL_956500, EPI_ISL_956501, EPI_ISL_956503, EPI_ISL_956504, EPI_ISL_956506, EPI_ISL_956508, EPI_ISL_956509, EPI_ISL_956510, EPI_ISL_956511, EPI_ISL_956512, EPI_ISL_956516, EPI_ISL_956518, EPI_ISL_956519, EPI_ISL_956520, EPI_ISL_956521, EPI_ISL_956523, EPI_ISL_956525, EPI_ISL_956527, EPI_ISL_956530, EPI_ISL_956532, EPI_ISL_956535, EPI_ISL_956538, EPI_ISL_956539, EPI_ISL_956541, EPI_ISL_956544, EPI_ISL_956545, EPI_ISL_956546, EPI_ISL_956548, EPI_ISL_956551, EPI_ISL_956552, EPI_ISL_956553, EPI_ISL_956554, EPI_ISL_956555, EPI_ISL_956556, EPI_ISL_956560, EPI_ISL_956561, EPI_ISL_956562, EPI_ISL_956564, EPI_ISL_956568, EPI_ISL_956570, EPI_ISL_956571, EPI_ISL_956572, EPI_ISL_956573, EPI_ISL_956578, EPI_ISL_956579, EPI_ISL_956580, EPI_ISL_956584, EPI_ISL_956585, EPI_ISL_956586, EPI_ISL_956587, EPI_ISL_956588, EPI_ISL_956589, EPI_ISL_956590, EPI_ISL_956591, EPI_ISL_956592, |                                                                                                                                          |                                                                                                                         |                                                                                                                                                                                                       |

|                                                                                                                                                                                                                                                                                                                                                                                                                                                                                                                                                                                                                                                                                                                                                                                                                                                                                                                                                                                                                                                                                                                                                                                                                                                                                                                                                                                                                                                                                                                                                                                                                                                                                                                                                                                                                                                                                                                                                                                                                                                                                                                                                                                                                                                                                                                                                                                                                                                                                                                                                                                                                                                                                                                                                                                                                                                                                                                                                                                                                                                                                                                                                                                                                                                                                                                                |           |                                 |                                                                            |                                                                                                                                                                                                                                                                                                             |
|--------------------------------------------------------------------------------------------------------------------------------------------------------------------------------------------------------------------------------------------------------------------------------------------------------------------------------------------------------------------------------------------------------------------------------------------------------------------------------------------------------------------------------------------------------------------------------------------------------------------------------------------------------------------------------------------------------------------------------------------------------------------------------------------------------------------------------------------------------------------------------------------------------------------------------------------------------------------------------------------------------------------------------------------------------------------------------------------------------------------------------------------------------------------------------------------------------------------------------------------------------------------------------------------------------------------------------------------------------------------------------------------------------------------------------------------------------------------------------------------------------------------------------------------------------------------------------------------------------------------------------------------------------------------------------------------------------------------------------------------------------------------------------------------------------------------------------------------------------------------------------------------------------------------------------------------------------------------------------------------------------------------------------------------------------------------------------------------------------------------------------------------------------------------------------------------------------------------------------------------------------------------------------------------------------------------------------------------------------------------------------------------------------------------------------------------------------------------------------------------------------------------------------------------------------------------------------------------------------------------------------------------------------------------------------------------------------------------------------------------------------------------------------------------------------------------------------------------------------------------------------------------------------------------------------------------------------------------------------------------------------------------------------------------------------------------------------------------------------------------------------------------------------------------------------------------------------------------------------------------------------------------------------------------------------------------------------|-----------|---------------------------------|----------------------------------------------------------------------------|-------------------------------------------------------------------------------------------------------------------------------------------------------------------------------------------------------------------------------------------------------------------------------------------------------------|
| EPI_ISL_956593, EPI_ISL_956594, EPI_ISL_956596, EPI_ISL_956597, EPI_ISL_956598, EPI_ISL_956600, EPI_ISL_956601, EPI_ISL_956602, EPI_ISL_956604, EPI_ISL_956608, EPI_ISL_956611, EPI_ISL_956615, EPI_ISL_956616, EPI_ISL_956617, EPI_ISL_956619, EPI_ISL_956620, EPI_ISL_956621, EPI_ISL_956624, EPI_ISL_956625, EPI_ISL_956628, EPI_ISL_956630, EPI_ISL_956632, EPI_ISL_956635, EPI_ISL_956636, EPI_ISL_956637, EPI_ISL_956638, EPI_ISL_956639, EPI_ISL_956640, EPI_ISL_956641, EPI_ISL_956642, EPI_ISL_956644, EPI_ISL_956645, EPI_ISL_956648, EPI_ISL_956649, EPI_ISL_956651, EPI_ISL_956652, EPI_ISL_956654, EPI_ISL_956655, EPI_ISL_956656, EPI_ISL_956658, EPI_ISL_956661, EPI_ISL_956664, EPI_ISL_956666, EPI_ISL_956667, EPI_ISL_956669, EPI_ISL_956671, EPI_ISL_956672, EPI_ISL_956673, EPI_ISL_956674, EPI_ISL_956675, EPI_ISL_956676, EPI_ISL_956677, EPI_ISL_956678, EPI_ISL_956679, EPI_ISL_956680, EPI_ISL_956681, EPI_ISL_956682, EPI_ISL_956683, EPI_ISL_956686, EPI_ISL_956687, EPI_ISL_956688, EPI_ISL_956690, EPI_ISL_956691, EPI_ISL_956692, EPI_ISL_956701, EPI_ISL_956702, EPI_ISL_956703, EPI_ISL_956704, EPI_ISL_956705, EPI_ISL_956706, EPI_ISL_956707, EPI_ISL_956708, EPI_ISL_956709, EPI_ISL_956710, EPI_ISL_956711, EPI_ISL_956712, EPI_ISL_956713, EPI_ISL_956714, EPI_ISL_956715, EPI_ISL_956717, EPI_ISL_956718, EPI_ISL_956721, EPI_ISL_956722, EPI_ISL_956724, EPI_ISL_956726, EPI_ISL_956729, EPI_ISL_956730, EPI_ISL_956731, EPI_ISL_956732, EPI_ISL_956733, EPI_ISL_956734, EPI_ISL_956735, EPI_ISL_956738, EPI_ISL_956742, EPI_ISL_956743, EPI_ISL_956744, EPI_ISL_956749, EPI_ISL_956750, EPI_ISL_956751, EPI_ISL_956753, EPI_ISL_956754, EPI_ISL_956755, EPI_ISL_956756, EPI_ISL_956757, EPI_ISL_956758, EPI_ISL_956759, EPI_ISL_956761, EPI_ISL_956764                                                                                                                                                                                                                                                                                                                                                                                                                                                                                                                                                                                                                                                                                                                                                                                                                                                                                                                                                                                                                                                                                                                                                                                                                                                                                                                                                                                                                                                                                                                                 | see above | Lighthouse Lab in Alderley Park | Wellcome Sanger Institute for the COVID-19 Genomics UK (COG-UK) Consortium | Jacquelyn Wynn, Mairead Hyland, The Lighthouse Lab in Alderley Park and Alex Alderton, Roberto Amato, Sonia Goncalves, Ewan Harrison, David K. Jackson, Ian Johnston, Dominic Kwiatkowski, Cordelia Langford, John Sillitoe on behalf of the Wellcome Sanger Institute COVID-19 Surveillance Team           |
| EPI_ISL_956765, EPI_ISL_956766, EPI_ISL_956767, EPI_ISL_956768, EPI_ISL_956770, EPI_ISL_956771, EPI_ISL_956773, EPI_ISL_956777, EPI_ISL_956778, EPI_ISL_956779, EPI_ISL_956780, EPI_ISL_956781, EPI_ISL_956782, EPI_ISL_956784, EPI_ISL_956788, EPI_ISL_956789, EPI_ISL_956790, EPI_ISL_956791, EPI_ISL_956792, EPI_ISL_956793, EPI_ISL_956794, EPI_ISL_956795, EPI_ISL_956796, EPI_ISL_956797, EPI_ISL_956798, EPI_ISL_956800, EPI_ISL_956801, EPI_ISL_956802, EPI_ISL_956803, EPI_ISL_956805, EPI_ISL_956806, EPI_ISL_956807, EPI_ISL_956808, EPI_ISL_956811, EPI_ISL_956812, EPI_ISL_956813, EPI_ISL_956814, EPI_ISL_956815, EPI_ISL_956816, EPI_ISL_956817, EPI_ISL_956818, EPI_ISL_956819, EPI_ISL_956820, EPI_ISL_956822, EPI_ISL_956824, EPI_ISL_956825, EPI_ISL_956827, EPI_ISL_956829, EPI_ISL_956832, EPI_ISL_956833, EPI_ISL_956834, EPI_ISL_956835, EPI_ISL_956837, EPI_ISL_956838, EPI_ISL_956839, EPI_ISL_956840, EPI_ISL_956841, EPI_ISL_956842, EPI_ISL_956843, EPI_ISL_956845, EPI_ISL_956846, EPI_ISL_956847, EPI_ISL_956848, EPI_ISL_956849, EPI_ISL_956852, EPI_ISL_956853, EPI_ISL_956854, EPI_ISL_956855, EPI_ISL_956857, EPI_ISL_956859, EPI_ISL_956860, EPI_ISL_956861, EPI_ISL_956863, EPI_ISL_956864, EPI_ISL_956865, EPI_ISL_956866, EPI_ISL_956867, EPI_ISL_956868, EPI_ISL_956869, EPI_ISL_956870, EPI_ISL_956871, EPI_ISL_956872, EPI_ISL_956873, EPI_ISL_956875, EPI_ISL_956876, EPI_ISL_956877, EPI_ISL_956878, EPI_ISL_956881, EPI_ISL_956882, EPI_ISL_956883, EPI_ISL_956886, EPI_ISL_956890, EPI_ISL_956891, EPI_ISL_956892, EPI_ISL_956893, EPI_ISL_956895, EPI_ISL_956896, EPI_ISL_956897, EPI_ISL_956899, EPI_ISL_956900, EPI_ISL_956901, EPI_ISL_956902, EPI_ISL_956924, EPI_ISL_956925, EPI_ISL_956927, EPI_ISL_956929, EPI_ISL_956930, EPI_ISL_956931, EPI_ISL_956932, EPI_ISL_956933, EPI_ISL_956935, EPI_ISL_956936, EPI_ISL_956937, EPI_ISL_956938, EPI_ISL_956940, EPI_ISL_956941, EPI_ISL_956943, EPI_ISL_956945, EPI_ISL_956946, EPI_ISL_956947, EPI_ISL_956948, EPI_ISL_956950, EPI_ISL_956951, EPI_ISL_956952, EPI_ISL_956953, EPI_ISL_956955, EPI_ISL_956956, EPI_ISL_956957, EPI_ISL_956958, EPI_ISL_956959, EPI_ISL_956960, EPI_ISL_956962, EPI_ISL_956963, EPI_ISL_956964, EPI_ISL_956966, EPI_ISL_956967, EPI_ISL_956968, EPI_ISL_956969, EPI_ISL_956970, EPI_ISL_956971, EPI_ISL_956972, EPI_ISL_956974, EPI_ISL_956975, EPI_ISL_956976, EPI_ISL_956977, EPI_ISL_956978, EPI_ISL_956979, EPI_ISL_956980, EPI_ISL_956982, EPI_ISL_956983, EPI_ISL_956985, EPI_ISL_956987, EPI_ISL_956989, EPI_ISL_956992, EPI_ISL_956994, EPI_ISL_956996, EPI_ISL_956997, EPI_ISL_957000, EPI_ISL_957002, EPI_ISL_957003, EPI_ISL_957004, EPI_ISL_957005, EPI_ISL_957006, EPI_ISL_957010, EPI_ISL_957011, EPI_ISL_957012, EPI_ISL_957013, EPI_ISL_957014, EPI_ISL_957015, EPI_ISL_957016, EPI_ISL_957017, EPI_ISL_957018, EPI_ISL_957019, EPI_ISL_957020, EPI_ISL_957021, EPI_ISL_957023, EPI_ISL_957025, EPI_ISL_957026, EPI_ISL_957027, EPI_ISL_957028, EPI_ISL_957029, EPI_ISL_957030, EPI_ISL_957031, EPI_ISL_957032, EPI_ISL_957033, EPI_ISL_957034, EPI_ISL_957035, EPI_ISL_957036, EPI_ISL_957037, EPI_ISL_957038, EPI_ISL_957039, EPI_ISL_957041, EPI_ISL_957042, EPI_ISL_957044, EPI_ISL_957045, EPI_ISL_957047, EPI_ISL_957048, EPI_ISL_957049, EPI_ISL_957050, EPI_ISL_957051 | see above | Lighthouse Lab in Milton Keynes | Wellcome Sanger Institute for the COVID-19 Genomics UK (COG-UK) Consortium | The Lighthouse Lab in Milton Keynes and Alex Alderton, Roberto Amato, Sonia Goncalves, Ewan Harrison, David K. Jackson, Ian Johnston, Dominic Kwiatkowski, Cordelia Langford, John Sillitoe on behalf of the Wellcome Sanger Institute COVID-19 Surveillance Team                                           |
| EPI_ISL_957054                                                                                                                                                                                                                                                                                                                                                                                                                                                                                                                                                                                                                                                                                                                                                                                                                                                                                                                                                                                                                                                                                                                                                                                                                                                                                                                                                                                                                                                                                                                                                                                                                                                                                                                                                                                                                                                                                                                                                                                                                                                                                                                                                                                                                                                                                                                                                                                                                                                                                                                                                                                                                                                                                                                                                                                                                                                                                                                                                                                                                                                                                                                                                                                                                                                                                                                 |           | Lighthouse Lab in Glasgow       | Wellcome Sanger Institute for the COVID-19 Genomics UK (COG-UK) Consortium | Harper VanSteenhouse, Yumi Kasai, David Gray, Carol Clugston, Anna Dominiczak and Alex Alderton, Roberto Amato, Sonia Goncalves, Ewan Harrison, David K. Jackson, Ian Johnston, Dominic Kwiatkowski, Cordelia Langford, John Sillitoe on behalf of the Wellcome Sanger Institute COVID-19 Surveillance Team |
| EPI_IS                                                                                                                                                                                                                                                                                                                                                                                                                                                                                                                                                                                                                                                                                                                                                                                                                                                                                                                                                                                                                                                                                                                                                                                                                                                                                                                                                                                                                                                                                                                                                                                                                                                                                                                                                                                                                                                                                                                                                                                                                                                                                                                                                                                                                                                                                                                                                                                                                                                                                                                                                                                                                                                                                                                                                                                                                                                                                                                                                                                                                                                                                                                                                                                                                                                                                                                         |           |                                 |                                                                            |                                                                                                                                                                                                                                                                                                             |



[illegible]

[illegible]

[illegible]

[illegible]

EPI\_ISL\_957703, EPI\_ISL\_957704

Lighthouse Lab in Cambridge

Wellcome Sanger Institute for the COVID-19 Genomics UK (COG-UK) Consortium

Rob Howes, The Lighthouse Lab in Cambridge and Alex Alderton, Roberto Amato, Sonia Goncalves, Ewan Harrison, David K. Jackson, Ian Johnston, Dominic Kwiatkowski, Cordelia Langford, John Sillitoe on behalf of the Wellcome Sanger Institute COVID-19 Surveillance Team

EPI\_ISL\_957705

Lighthouse Lab in Milton Keynes

Wellcome Sanger Institute for the COVID-19 Genomics UK (COG-UK) Consortium

The Lighthouse Lab in Milton Keynes and Alex Alderton, Roberto Amato, Sonia Goncalves, Ewan Harrison, David K. Jackson, Ian Johnston, Dominic Kwiatkowski, Cordelia Langford, John Sillitoe on behalf of the Wellcome Sanger Institute COVID-19 Surveillance Team

We gratefully acknowledge the following Authors from the Originating laboratories responsible for obtaining the specimens, as well as the Submitting laboratories where the genome data were generated and shared via GISAID, on which this research is based.

All Submitters of data may be contacted directly via [www.gisaid.org](http://www.gisaid.org)

Authors are sorted alphabetically.

[illegible]

[illegible]

[illegible]



|                                                                                                                                                                                                                                                                                                                                                                                                                                                                                                                                                                                                                                                                                                                                                                                                                                                                                                                                                                                                                                                                                                                                                                                                                                                                                                                                                                                                                                                                                                                                                                                                                                                                                                                                                                                                                                                                                                                                                                                                                                                                                                                                                                                                                                                                                                                                                                                                                                                                                                                                                                                                                                                                                                                                                                                |                                                               |                                                                                                                        |                                                                                                                                                                                                                                                                                                                                 |
|--------------------------------------------------------------------------------------------------------------------------------------------------------------------------------------------------------------------------------------------------------------------------------------------------------------------------------------------------------------------------------------------------------------------------------------------------------------------------------------------------------------------------------------------------------------------------------------------------------------------------------------------------------------------------------------------------------------------------------------------------------------------------------------------------------------------------------------------------------------------------------------------------------------------------------------------------------------------------------------------------------------------------------------------------------------------------------------------------------------------------------------------------------------------------------------------------------------------------------------------------------------------------------------------------------------------------------------------------------------------------------------------------------------------------------------------------------------------------------------------------------------------------------------------------------------------------------------------------------------------------------------------------------------------------------------------------------------------------------------------------------------------------------------------------------------------------------------------------------------------------------------------------------------------------------------------------------------------------------------------------------------------------------------------------------------------------------------------------------------------------------------------------------------------------------------------------------------------------------------------------------------------------------------------------------------------------------------------------------------------------------------------------------------------------------------------------------------------------------------------------------------------------------------------------------------------------------------------------------------------------------------------------------------------------------------------------------------------------------------------------------------------------------|---------------------------------------------------------------|------------------------------------------------------------------------------------------------------------------------|---------------------------------------------------------------------------------------------------------------------------------------------------------------------------------------------------------------------------------------------------------------------------------------------------------------------------------|
| EPI_ISL_958137, EPI_ISL_958138, EPI_ISL_958139, EPI_ISL_958141, EPI_ISL_958142, EPI_ISL_958143, EPI_ISL_958144, EPI_ISL_958145, EPI_ISL_958146, EPI_ISL_958148, EPI_ISL_958149, EPI_ISL_958150, EPI_ISL_958151, EPI_ISL_958152, EPI_ISL_958153, EPI_ISL_958154, EPI_ISL_958155, EPI_ISL_958156, EPI_ISL_958158, EPI_ISL_958159, EPI_ISL_958160, EPI_ISL_958161, EPI_ISL_958162, EPI_ISL_958163, EPI_ISL_958164, EPI_ISL_958182, EPI_ISL_958188, EPI_ISL_958189, EPI_ISL_958190, EPI_ISL_958191, EPI_ISL_958192, EPI_ISL_958194, EPI_ISL_958209, EPI_ISL_958210, EPI_ISL_958211, EPI_ISL_958212, EPI_ISL_958213, EPI_ISL_958217, EPI_ISL_958219, EPI_ISL_958246, EPI_ISL_958248, EPI_ISL_958249, EPI_ISL_958253, EPI_ISL_958258, EPI_ISL_958263, EPI_ISL_958287, EPI_ISL_958292, EPI_ISL_958293, EPI_ISL_958296, EPI_ISL_958297, EPI_ISL_958298, EPI_ISL_958328, EPI_ISL_958329, EPI_ISL_958330, EPI_ISL_958333, EPI_ISL_958336, EPI_ISL_958337, EPI_ISL_958344, EPI_ISL_958367, EPI_ISL_958368, EPI_ISL_958369, EPI_ISL_958370, EPI_ISL_958371, EPI_ISL_958374, EPI_ISL_958375, EPI_ISL_958406, EPI_ISL_958408, EPI_ISL_958410, EPI_ISL_958411, EPI_ISL_958416, EPI_ISL_958417, EPI_ISL_958418, EPI_ISL_958448, EPI_ISL_958450, EPI_ISL_958455, EPI_ISL_958456, EPI_ISL_958458, EPI_ISL_958460, EPI_ISL_958491, EPI_ISL_958492, EPI_ISL_958496, EPI_ISL_958498, EPI_ISL_958502, EPI_ISL_958507, EPI_ISL_958537, EPI_ISL_958541, EPI_ISL_958542, EPI_ISL_958543, EPI_ISL_958544, EPI_ISL_958545, EPI_ISL_958551, EPI_ISL_958582, EPI_ISL_958583, EPI_ISL_958586, EPI_ISL_958587, EPI_ISL_958588, EPI_ISL_958589, EPI_ISL_958590, EPI_ISL_958609, EPI_ISL_958610, EPI_ISL_958613, EPI_ISL_958615, EPI_ISL_958616, EPI_ISL_958621, EPI_ISL_958624, EPI_ISL_958646, EPI_ISL_958648, EPI_ISL_958649, EPI_ISL_958650, EPI_ISL_958651, EPI_ISL_958652, EPI_ISL_958654, EPI_ISL_958680, EPI_ISL_958681, EPI_ISL_958682, EPI_ISL_958684, EPI_ISL_958685, EPI_ISL_958686, EPI_ISL_958703, EPI_ISL_958704, EPI_ISL_958705, EPI_ISL_958708, EPI_ISL_958709, EPI_ISL_958711, EPI_ISL_958712, EPI_ISL_958735, EPI_ISL_958736, EPI_ISL_958737, EPI_ISL_958738, EPI_ISL_958743, EPI_ISL_958744, EPI_ISL_958773, EPI_ISL_958774, EPI_ISL_958781, EPI_ISL_958786, EPI_ISL_958787, EPI_ISL_958788, EPI_ISL_958779, EPI_ISL_958802, EPI_ISL_958803, EPI_ISL_958804, EPI_ISL_958805, EPI_ISL_958806, EPI_ISL_958807, EPI_ISL_958812, EPI_ISL_958831, EPI_ISL_958832, EPI_ISL_958834, EPI_ISL_958836, EPI_ISL_958837, EPI_ISL_958838, EPI_ISL_958839, EPI_ISL_958864, EPI_ISL_958865, EPI_ISL_958866, EPI_ISL_958867, EPI_ISL_958870, EPI_ISL_958873, EPI_ISL_958875, EPI_ISL_958900, EPI_ISL_958901, EPI_ISL_958903, EPI_ISL_958905, EPI_ISL_958907, EPI_ISL_958908, EPI_ISL_958912, EPI_ISL_958913 |                                                               |                                                                                                                        |                                                                                                                                                                                                                                                                                                                                 |
| see above                                                                                                                                                                                                                                                                                                                                                                                                                                                                                                                                                                                                                                                                                                                                                                                                                                                                                                                                                                                                                                                                                                                                                                                                                                                                                                                                                                                                                                                                                                                                                                                                                                                                                                                                                                                                                                                                                                                                                                                                                                                                                                                                                                                                                                                                                                                                                                                                                                                                                                                                                                                                                                                                                                                                                                      | Lighthouse Lab in Milton Keynes                               | Wellcome Sanger Institute for the COVID-19 Genomics UK (COG-UK) Consortium                                             | The Lighthouse Lab in Milton Keynes and Alex Alderton, Roberto Amato, Sonia Goncalves, Ewan Harrison, David K. Jackson, Ian Johnston, Dominic Kwiatkowski, Cordelia Langford, John Sillitoe on behalf of the Wellcome Sanger Institute COVID-19 Surveillance Team                                                               |
| EPI_ISL_958922, EPI_ISL_958923, EPI_ISL_958924, EPI_ISL_958928, EPI_ISL_958929, EPI_ISL_958937, EPI_ISL_958940, EPI_ISL_958943, EPI_ISL_958944, EPI_ISL_958949, EPI_ISL_958950, EPI_ISL_958951, EPI_ISL_958953, EPI_ISL_958954, EPI_ISL_958956, EPI_ISL_958959, EPI_ISL_959002, EPI_ISL_959009, EPI_ISL_959012, EPI_ISL_959016, EPI_ISL_959051, EPI_ISL_959059, EPI_ISL_959061, EPI_ISL_959068, EPI_ISL_959071, EPI_ISL_959072, EPI_ISL_959073, EPI_ISL_959129, EPI_ISL_959133, EPI_ISL_959142, EPI_ISL_959146, EPI_ISL_959161, EPI_ISL_959163, EPI_ISL_959165, EPI_ISL_959169, EPI_ISL_959171, EPI_ISL_959172, EPI_ISL_959173, EPI_ISL_959176, EPI_ISL_959210, EPI_ISL_959214, EPI_ISL_959215, EPI_ISL_959220, EPI_ISL_959221, EPI_ISL_959227, EPI_ISL_959249, EPI_ISL_959254, EPI_ISL_959255, EPI_ISL_959257, EPI_ISL_959259, EPI_ISL_959262, EPI_ISL_959263                                                                                                                                                                                                                                                                                                                                                                                                                                                                                                                                                                                                                                                                                                                                                                                                                                                                                                                                                                                                                                                                                                                                                                                                                                                                                                                                                                                                                                                                                                                                                                                                                                                                                                                                                                                                                                                                                                                 |                                                               |                                                                                                                        |                                                                                                                                                                                                                                                                                                                                 |
| see above                                                                                                                                                                                                                                                                                                                                                                                                                                                                                                                                                                                                                                                                                                                                                                                                                                                                                                                                                                                                                                                                                                                                                                                                                                                                                                                                                                                                                                                                                                                                                                                                                                                                                                                                                                                                                                                                                                                                                                                                                                                                                                                                                                                                                                                                                                                                                                                                                                                                                                                                                                                                                                                                                                                                                                      | Lighthouse Lab in Alderley Park                               | Wellcome Sanger Institute for the COVID-19 Genomics UK (COG-UK) Consortium                                             | Jacquelyn Wynn, Mairead Hyland, The Lighthouse Lab in Alderley Park and Alex Alderton, Roberto Amato, Sonia Goncalves, Ewan Harrison, David K. Jackson, Ian Johnston, Dominic Kwiatkowski, Cordelia Langford, John Sillitoe on behalf of the Wellcome Sanger Institute COVID-19 Surveillance Team                               |
| EPI_ISL_959271, EPI_ISL_959272, EPI_ISL_959273                                                                                                                                                                                                                                                                                                                                                                                                                                                                                                                                                                                                                                                                                                                                                                                                                                                                                                                                                                                                                                                                                                                                                                                                                                                                                                                                                                                                                                                                                                                                                                                                                                                                                                                                                                                                                                                                                                                                                                                                                                                                                                                                                                                                                                                                                                                                                                                                                                                                                                                                                                                                                                                                                                                                 | Lighthouse Lab in Milton Keynes                               | Wellcome Sanger Institute for the COVID-19 Genomics UK (COG-UK) Consortium                                             | The Lighthouse Lab in Milton Keynes and Alex Alderton, Roberto Amato, Sonia Goncalves, Ewan Harrison, David K. Jackson, Ian Johnston, Dominic Kwiatkowski, Cordelia Langford, John Sillitoe on behalf of the Wellcome Sanger Institute COVID-19 Surveillance Team                                                               |
| EPI_ISL_959286                                                                                                                                                                                                                                                                                                                                                                                                                                                                                                                                                                                                                                                                                                                                                                                                                                                                                                                                                                                                                                                                                                                                                                                                                                                                                                                                                                                                                                                                                                                                                                                                                                                                                                                                                                                                                                                                                                                                                                                                                                                                                                                                                                                                                                                                                                                                                                                                                                                                                                                                                                                                                                                                                                                                                                 | General Hospital - Strumica                                   | Research Center for Genetic Engineering and Biotechnology "Georgi D. Efremov", Macedonian Academy of Sciences and Arts | Aleksandar J. Dimovski, Dijana Plasheska-Karanfilska, Predrag Noveski, Gjorgji Bozinovski, Milena Jakimovska                                                                                                                                                                                                                    |
| EPI_ISL_959287                                                                                                                                                                                                                                                                                                                                                                                                                                                                                                                                                                                                                                                                                                                                                                                                                                                                                                                                                                                                                                                                                                                                                                                                                                                                                                                                                                                                                                                                                                                                                                                                                                                                                                                                                                                                                                                                                                                                                                                                                                                                                                                                                                                                                                                                                                                                                                                                                                                                                                                                                                                                                                                                                                                                                                 | Laboratory of Virology and Molecular Diagnostics              | Institute of Public Health of Republic of North Macedonia Laboratory of Virology and Molecular Diagnostics             | Maja Kuzmanovska, Golubinka Boshevska                                                                                                                                                                                                                                                                                           |
| EPI_ISL_959288                                                                                                                                                                                                                                                                                                                                                                                                                                                                                                                                                                                                                                                                                                                                                                                                                                                                                                                                                                                                                                                                                                                                                                                                                                                                                                                                                                                                                                                                                                                                                                                                                                                                                                                                                                                                                                                                                                                                                                                                                                                                                                                                                                                                                                                                                                                                                                                                                                                                                                                                                                                                                                                                                                                                                                 | General Hospital - Shtip                                      | Research Center for Genetic Engineering and Biotechnology "Georgi D. Efremov", Macedonian Academy of Sciences and Arts | Aleksandar J. Dimovski, Dijana Plasheska-Karanfilska, Predrag Noveski, Gjorgji Bozinovski, Milena Jakimovska                                                                                                                                                                                                                    |
| EPI_ISL_959289, EPI_ISL_959291                                                                                                                                                                                                                                                                                                                                                                                                                                                                                                                                                                                                                                                                                                                                                                                                                                                                                                                                                                                                                                                                                                                                                                                                                                                                                                                                                                                                                                                                                                                                                                                                                                                                                                                                                                                                                                                                                                                                                                                                                                                                                                                                                                                                                                                                                                                                                                                                                                                                                                                                                                                                                                                                                                                                                 | General Hospital - Ohrid                                      | Research Center for Genetic Engineering and Biotechnology "Georgi D. Efremov", Macedonian Academy of Sciences and Arts | Aleksandar J. Dimovski, Dijana Plasheska-Karanfilska, Predrag Noveski, Gjorgji Bozinovski, Milena Jakimovska                                                                                                                                                                                                                    |
| EPI_ISL_959369                                                                                                                                                                                                                                                                                                                                                                                                                                                                                                                                                                                                                                                                                                                                                                                                                                                                                                                                                                                                                                                                                                                                                                                                                                                                                                                                                                                                                                                                                                                                                                                                                                                                                                                                                                                                                                                                                                                                                                                                                                                                                                                                                                                                                                                                                                                                                                                                                                                                                                                                                                                                                                                                                                                                                                 | Viollier AG                                                   | University Hospital Basel, Clinical Bacteriology                                                                       | Tim Roloff, Madlen Stange, Helena MB Seth-Smith, Alfredo Mari, Karoline Leuzinger, Julia Bielicki, Christiane Beckmann, Manuel Battagay, Hans Hirsch, Adrian Egli                                                                                                                                                               |
| EPI_ISL_959370                                                                                                                                                                                                                                                                                                                                                                                                                                                                                                                                                                                                                                                                                                                                                                                                                                                                                                                                                                                                                                                                                                                                                                                                                                                                                                                                                                                                                                                                                                                                                                                                                                                                                                                                                                                                                                                                                                                                                                                                                                                                                                                                                                                                                                                                                                                                                                                                                                                                                                                                                                                                                                                                                                                                                                 | National Institute of Laboratory Medicine and Referral Center | Genomic Research Lab, BCSIR                                                                                            | Barna Goswami, Mohammad Samir Uzzaman, Eshrar Osman, Md. Ahashan Habib, Shahina Akter, Tanjina Akhtar Banu, Abu Sayeed Mohammad Mahmud, Md. Murshed Hasan Sarkar, Iffat Jahan, Md. Saddam Hossain, Tasnim Nafisa, Md. Maruf Ahmed Molla, Mahmuda Yeasmin, Asish Kumar Ghosh, Arifa Akram, A. K. M. Shamsuzzaman, Md. Salim Khan |
| EPI_ISL_959371                                                                                                                                                                                                                                                                                                                                                                                                                                                                                                                                                                                                                                                                                                                                                                                                                                                                                                                                                                                                                                                                                                                                                                                                                                                                                                                                                                                                                                                                                                                                                                                                                                                                                                                                                                                                                                                                                                                                                                                                                                                                                                                                                                                                                                                                                                                                                                                                                                                                                                                                                                                                                                                                                                                                                                 | National Institute of Laboratory Medicine and Referral Center | Genomic Research Lab, BCSIR                                                                                            | Shahina Akter, Mohammad Samir Uzzaman, Eshrar Osman, Md. Ahashan Habib, Tanjina Akhtar Banu, Abu Sayeed Mohammad Mahmud, Md. Murshed Hasan Sarkar, Barna Goswami, Iffat Jahan, Md. Saddam Hossain, Tasnim Nafisa, Md. Maruf Ahmed Molla, Mahmuda Yeasmin, Asish Kumar Ghosh, Arifa Akram, A. K. M. Shamsuzzaman, Md. Salim Khan |
| EPI_ISL_959372                                                                                                                                                                                                                                                                                                                                                                                                                                                                                                                                                                                                                                                                                                                                                                                                                                                                                                                                                                                                                                                                                                                                                                                                                                                                                                                                                                                                                                                                                                                                                                                                                                                                                                                                                                                                                                                                                                                                                                                                                                                                                                                                                                                                                                                                                                                                                                                                                                                                                                                                                                                                                                                                                                                                                                 | National Institute of Laboratory Medicine and Referral Center | Genomic Research Lab, BCSIR                                                                                            | Tanjina Akhtar Banu, Mohammad Samir Uzzaman, Eshrar Osman, Md. Ahashan Habib, Shahina Akter, Abu Sayeed Mohammad Mahmud, Md. Murshed Hasan Sarkar, Barna Goswami, Iffat Jahan, Md. Saddam Hossain, Tasnim Nafisa, Md. Maruf Ahmed Molla, Mahmuda Yeasmin, Asish Kumar Ghosh, Arifa Akram, A. K. M. Shamsuzzaman, Md. Salim Khan |
| EPI_ISL_959376                                                                                                                                                                                                                                                                                                                                                                                                                                                                                                                                                                                                                                                                                                                                                                                                                                                                                                                                                                                                                                                                                                                                                                                                                                                                                                                                                                                                                                                                                                                                                                                                                                                                                                                                                                                                                                                                                                                                                                                                                                                                                                                                                                                                                                                                                                                                                                                                                                                                                                                                                                                                                                                                                                                                                                 | Laboratory of Virology and Molecular Diagnostics              | Institute of Public Health of Republic of North Macedonia Laboratory of Virology and Molecular Diagnostics             | Kuzmanovska M., Boshevska G.                                                                                                                                                                                                                                                                                                    |
| EPI_ISL_959388, EPI_ISL_959389, EPI_ISL_959390, EPI_ISL_959391, EPI_ISL_959392, EPI_ISL_959393, EPI_ISL_959394, EPI_ISL_959395, EPI_ISL_959396, EPI_ISL_959397, EPI_ISL_959398, EPI_ISL_959399, EPI_ISL_959400, EPI_ISL_959401, EPI_ISL_959402, EPI_ISL_959403, EPI_ISL_959404, EPI_ISL_959405, EPI_ISL_959406, EPI_ISL_959407, EPI_ISL_959408, EPI_ISL_959409, EPI_ISL_959410, EPI_ISL_959411, EPI_ISL_959412, EPI_ISL_959413                                                                                                                                                                                                                                                                                                                                                                                                                                                                                                                                                                                                                                                                                                                                                                                                                                                                                                                                                                                                                                                                                                                                                                                                                                                                                                                                                                                                                                                                                                                                                                                                                                                                                                                                                                                                                                                                                                                                                                                                                                                                                                                                                                                                                                                                                                                                                 |                                                               |                                                                                                                        |                                                                                                                                                                                                                                                                                                                                 |
| see above                                                                                                                                                                                                                                                                                                                                                                                                                                                                                                                                                                                                                                                                                                                                                                                                                                                                                                                                                                                                                                                                                                                                                                                                                                                                                                                                                                                                                                                                                                                                                                                                                                                                                                                                                                                                                                                                                                                                                                                                                                                                                                                                                                                                                                                                                                                                                                                                                                                                                                                                                                                                                                                                                                                                                                      | genXone SA, Molecular Diagnostics Laboratory / NZOZ           | genXone SA, Research & Development Laboratory                                                                          | Maciej Sykulski, Grzegorz Nowicki, Jakub Grabowski, Natalia Drwska-Matelska, Anna Brylak-Baszków, Aleksandra Gidlewicz, Karol Szeszko, ukasz Krych, Micha Kaszuba                                                                                                                                                               |
| EPI_ISL_959432, EPI_ISL_959434, EPI_ISL_959437, EPI_ISL_959439, EPI_ISL_959441, EPI_ISL_959442, EPI_ISL_959447, EPI_ISL_959448, EPI_ISL_959450, EPI_ISL_959451, EPI_ISL_959454, EPI_ISL_959456, EPI_ISL_959457, EPI_ISL_959458, EPI_ISL_959459, EPI_ISL_959460, EPI_ISL_959464, EPI_ISL_959471                                                                                                                                                                                                                                                                                                                                                                                                                                                                                                                                                                                                                                                                                                                                                                                                                                                                                                                                                                                                                                                                                                                                                                                                                                                                                                                                                                                                                                                                                                                                                                                                                                                                                                                                                                                                                                                                                                                                                                                                                                                                                                                                                                                                                                                                                                                                                                                                                                                                                 |                                                               |                                                                                                                        |                                                                                                                                                                                                                                                                                                                                 |
| see above                                                                                                                                                                                                                                                                                                                                                                                                                                                                                                                                                                                                                                                                                                                                                                                                                                                                                                                                                                                                                                                                                                                                                                                                                                                                                                                                                                                                                                                                                                                                                                                                                                                                                                                                                                                                                                                                                                                                                                                                                                                                                                                                                                                                                                                                                                                                                                                                                                                                                                                                                                                                                                                                                                                                                                      | Servicio de Microbiología, Hospital Universitario Son Espases | SeqCOVID-SPAIN consortium/IBV(CSIC)                                                                                    | Carla López-Causapé, Jordi Reina, Antonio Oliver and SeqCOVID-SPAIN consortium                                                                                                                                                                                                                                                  |
| EPI_ISL_959475                                                                                                                                                                                                                                                                                                                                                                                                                                                                                                                                                                                                                                                                                                                                                                                                                                                                                                                                                                                                                                                                                                                                                                                                                                                                                                                                                                                                                                                                                                                                                                                                                                                                                                                                                                                                                                                                                                                                                                                                                                                                                                                                                                                                                                                                                                                                                                                                                                                                                                                                                                                                                                                                                                                                                                 | National Institute of Laboratory Medicine and Referral Center | Genomic Research Lab, BCSIR                                                                                            | Iffat Jahan, Mohammad Samir Uzzaman, Md. Ahashan Habib, Shahina Akter, Tanjina Akhtar Banu, Abu Sayeed Mohammad Mahmud, Md. Murshed Hasan Sarkar, Barna Goswami, Saddam Hossain, Tasnim Nafisa, Md. Maruf Ahmed Molla, Mahmuda Yeasmin, Asish Kumar Ghosh, Arifa Akram, A. K. M. Shamsuzzaman, Md. Salim Khan                   |
| EPI_ISL_959544                                                                                                                                                                                                                                                                                                                                                                                                                                                                                                                                                                                                                                                                                                                                                                                                                                                                                                                                                                                                                                                                                                                                                                                                                                                                                                                                                                                                                                                                                                                                                                                                                                                                                                                                                                                                                                                                                                                                                                                                                                                                                                                                                                                                                                                                                                                                                                                                                                                                                                                                                                                                                                                                                                                                                                 | Laboratory of Virology and Molecular Diagnostics              | Institute of Public Health of Republic of North Macedonia Laboratory of Virology and Molecular Diagnostics             | Kuzmanovska M., Boshevska G.                                                                                                                                                                                                                                                                                                    |
| EPI_ISL_959545                                                                                                                                                                                                                                                                                                                                                                                                                                                                                                                                                                                                                                                                                                                                                                                                                                                                                                                                                                                                                                                                                                                                                                                                                                                                                                                                                                                                                                                                                                                                                                                                                                                                                                                                                                                                                                                                                                                                                                                                                                                                                                                                                                                                                                                                                                                                                                                                                                                                                                                                                                                                                                                                                                                                                                 | National Institute of Laboratory Medicine and Referral Center | Genomic Research Lab, BCSIR                                                                                            | Md. Saddam Hossain, Mohammad Samir Uzzaman, Eshrar Osman, Md. Ahashan Habib, Shahina Akter, Tanjina Akhtar Banu, Abu Sayeed Mohammad Mahmud, Md. Murshed Hasan Sarkar, Barna Goswami, Iffat Jahan, Tasnim Nafisa, Md. Maruf Ahmed Molla, Mahmuda Yeasmin, Asish Kumar Ghosh, Arifa Akram, A. K. M. Shamsuzzaman, Md. Salim Khan |
| EPI_ISL_959546                                                                                                                                                                                                                                                                                                                                                                                                                                                                                                                                                                                                                                                                                                                                                                                                                                                                                                                                                                                                                                                                                                                                                                                                                                                                                                                                                                                                                                                                                                                                                                                                                                                                                                                                                                                                                                                                                                                                                                                                                                                                                                                                                                                                                                                                                                                                                                                                                                                                                                                                                                                                                                                                                                                                                                 | Laboratory of Virology and Molecular Diagnostics              | Institute of Public Health of Republic of North Macedonia Laboratory of Virology and Molecular Diagnostics             | Kuzmanovska M., Boshevska G.                                                                                                                                                                                                                                                                                                    |
| EPI_ISL_959571, EPI_ISL_959572,                                                                                                                                                                                                                                                                                                                                                                                                                                                                                                                                                                                                                                                                                                                                                                                                                                                                                                                                                                                                                                                                                                                                                                                                                                                                                                                                                                                                                                                                                                                                                                                                                                                                                                                                                                                                                                                                                                                                                                                                                                                                                                                                                                                                                                                                                                                                                                                                                                                                                                                                                                                                                                                                                                                                                | Labo Luc Olivier                                              | GIGA Medical Genomics                                                                                                  | Keith Durkin, Maria Artesi, Sébastien Bontems, Raphaël Boreux, Bouchra Boujemla, Cécile Meex, Pierrette Melin, Marie-Pierre Hayette, Vincent Bours                                                                                                                                                                              |

|                                                                                                                                                                                                                                                                                                                                                                                                                                                                                                                                                                                                                                                                                                                                                                                                                                                                                                                                                                                                                                                                                                                                |                                                                                                           |                                                                           |                                                                                                                                                                                                                                                                                                                                                                                                          |
|--------------------------------------------------------------------------------------------------------------------------------------------------------------------------------------------------------------------------------------------------------------------------------------------------------------------------------------------------------------------------------------------------------------------------------------------------------------------------------------------------------------------------------------------------------------------------------------------------------------------------------------------------------------------------------------------------------------------------------------------------------------------------------------------------------------------------------------------------------------------------------------------------------------------------------------------------------------------------------------------------------------------------------------------------------------------------------------------------------------------------------|-----------------------------------------------------------------------------------------------------------|---------------------------------------------------------------------------|----------------------------------------------------------------------------------------------------------------------------------------------------------------------------------------------------------------------------------------------------------------------------------------------------------------------------------------------------------------------------------------------------------|
| EPI_ISL_959577, EPI_ISL_959582, EPI_ISL_959584, EPI_ISL_959585                                                                                                                                                                                                                                                                                                                                                                                                                                                                                                                                                                                                                                                                                                                                                                                                                                                                                                                                                                                                                                                                 |                                                                                                           |                                                                           |                                                                                                                                                                                                                                                                                                                                                                                                          |
| EPI_ISL_959589                                                                                                                                                                                                                                                                                                                                                                                                                                                                                                                                                                                                                                                                                                                                                                                                                                                                                                                                                                                                                                                                                                                 | Vivalia - Clinique Saint-Joseph                                                                           | GIGA Medical Genomics                                                     | Keith Durkin, Maria Artesi, Sébastien Bontems, Raphaël Boreux, Bouchra Boujemla, Cécile Meex, Pierrette Melin, Marie-Pierre Hayette, Vincent Bours                                                                                                                                                                                                                                                       |
| EPI_ISL_959600, EPI_ISL_959601, EPI_ISL_959602                                                                                                                                                                                                                                                                                                                                                                                                                                                                                                                                                                                                                                                                                                                                                                                                                                                                                                                                                                                                                                                                                 | CHR de la Citadelle                                                                                       | GIGA Medical Genomics                                                     | Keith Durkin, Maria Artesi, Sébastien Bontems, Raphaël Boreux, Bouchra Boujemla, Cécile Meex, Pierrette Melin, Marie-Pierre Hayette, Vincent Bours                                                                                                                                                                                                                                                       |
| EPI_ISL_959603                                                                                                                                                                                                                                                                                                                                                                                                                                                                                                                                                                                                                                                                                                                                                                                                                                                                                                                                                                                                                                                                                                                 | Synlab                                                                                                    | GIGA Medical Genomics                                                     | Keith Durkin, Maria Artesi, Sébastien Bontems, Raphaël Boreux, Bouchra Boujemla, Cécile Meex, Pierrette Melin, Marie-Pierre Hayette, Vincent Bours                                                                                                                                                                                                                                                       |
| EPI_ISL_959637                                                                                                                                                                                                                                                                                                                                                                                                                                                                                                                                                                                                                                                                                                                                                                                                                                                                                                                                                                                                                                                                                                                 | Institute of Virology, Biomedical Research Center of the Slovak Academy of Sciences, Bratislava           | Faculty of Natural Sciences, Comenius University, Bratislava              | Broa Brejová, Viktória abanová, Kristína Boršová, Viktória Hodorová, Sabina Fumaová Havlíková, Juraj Kopáek, Martina Liková, ubomíra Lukáiková, Martina Neboháová, Monika Sláviková, Tomáš Vina, Jozef Nosek, Boris Klempa                                                                                                                                                                               |
| EPI_ISL_959639, EPI_ISL_959645, EPI_ISL_959646                                                                                                                                                                                                                                                                                                                                                                                                                                                                                                                                                                                                                                                                                                                                                                                                                                                                                                                                                                                                                                                                                 | Institute of Virology, Biomedical Research Center of the Slovak Academy of Sciences, Bratislava           | Faculty of Natural Sciences, Comenius University, Bratislava              | Kristína Boršová, Viktória abanová, Broa Brejová, Viktória Hodorová, Sabina Fumaová Havlíková, Juraj Kopáek, Martina Liková, ubomíra Lukáiková, Martina Neboháová, Monika Sláviková, Tomáš Vina, Boris Klempa, Jozef Nosek                                                                                                                                                                               |
| EPI_ISL_959750, EPI_ISL_959751, EPI_ISL_959752, EPI_ISL_959753, EPI_ISL_959754, EPI_ISL_959756, EPI_ISL_959757, EPI_ISL_959758, EPI_ISL_959759, EPI_ISL_959760, EPI_ISL_959765, EPI_ISL_959767, EPI_ISL_959768, EPI_ISL_959769, EPI_ISL_959771, EPI_ISL_959772, EPI_ISL_959773, EPI_ISL_959777, EPI_ISL_959778, EPI_ISL_959780, EPI_ISL_959781, EPI_ISL_959782, EPI_ISL_959783, EPI_ISL_959784, EPI_ISL_959785, EPI_ISL_959786, EPI_ISL_959787, EPI_ISL_959788, EPI_ISL_959789, EPI_ISL_959790, EPI_ISL_959791, EPI_ISL_959792, EPI_ISL_959793, EPI_ISL_959794, EPI_ISL_959796, EPI_ISL_959799, EPI_ISL_959800, EPI_ISL_959801, EPI_ISL_959802, EPI_ISL_959803, EPI_ISL_959805, EPI_ISL_959811, EPI_ISL_959812, EPI_ISL_959813, EPI_ISL_959814, EPI_ISL_959815, EPI_ISL_959816, EPI_ISL_959817, EPI_ISL_959818, EPI_ISL_959820, EPI_ISL_959821, EPI_ISL_959822, EPI_ISL_959823, EPI_ISL_959824, EPI_ISL_959825, EPI_ISL_959826, EPI_ISL_959827, EPI_ISL_959828, EPI_ISL_959829, EPI_ISL_959830, EPI_ISL_959831, EPI_ISL_959832, EPI_ISL_959833, EPI_ISL_959834, EPI_ISL_959835, EPI_ISL_959836, EPI_ISL_959837, EPI_ISL_959838 |                                                                                                           |                                                                           |                                                                                                                                                                                                                                                                                                                                                                                                          |
| see above                                                                                                                                                                                                                                                                                                                                                                                                                                                                                                                                                                                                                                                                                                                                                                                                                                                                                                                                                                                                                                                                                                                      | National Virus Reference Laboratory                                                                       | National Virus Reference Laboratory                                       | Michael Carr, Gabriel Gonzalez, Jonathan Dean, Cillian F De Gascun                                                                                                                                                                                                                                                                                                                                       |
| EPI_ISL_960405, EPI_ISL_960406, EPI_ISL_960408, EPI_ISL_960412, EPI_ISL_960415, EPI_ISL_960420, EPI_ISL_960421, EPI_ISL_960422, EPI_ISL_960427, EPI_ISL_960428, EPI_ISL_960429, EPI_ISL_960431, EPI_ISL_960437, EPI_ISL_960439, EPI_ISL_960440                                                                                                                                                                                                                                                                                                                                                                                                                                                                                                                                                                                                                                                                                                                                                                                                                                                                                 |                                                                                                           |                                                                           |                                                                                                                                                                                                                                                                                                                                                                                                          |
| see above                                                                                                                                                                                                                                                                                                                                                                                                                                                                                                                                                                                                                                                                                                                                                                                                                                                                                                                                                                                                                                                                                                                      | The National Institute of Public Health                                                                   | State Veterinary Institute Prague                                         | Nagy,A;Vecerova,J;Cernikova,L;Stara,M;Jirincova,H;Trnka,D                                                                                                                                                                                                                                                                                                                                                |
| EPI_ISL_960893                                                                                                                                                                                                                                                                                                                                                                                                                                                                                                                                                                                                                                                                                                                                                                                                                                                                                                                                                                                                                                                                                                                 | Institute of Medical Microbiology and Hospital Hygiene                                                    | Institute of Medical Microbiology and Hospital Hygiene                    | Prof. Dr. Achim Kaasch, Aljoscha Tersteegen                                                                                                                                                                                                                                                                                                                                                              |
| EPI_ISL_960905, EPI_ISL_960906, EPI_ISL_960908, EPI_ISL_960909, EPI_ISL_960910, EPI_ISL_960912, EPI_ISL_960913, EPI_ISL_960914, EPI_ISL_960915, EPI_ISL_960916, EPI_ISL_960917, EPI_ISL_960918, EPI_ISL_960919, EPI_ISL_960920, EPI_ISL_960921, EPI_ISL_960922, EPI_ISL_960923, EPI_ISL_960924, EPI_ISL_960925, EPI_ISL_960926, EPI_ISL_960927, EPI_ISL_960928, EPI_ISL_960929, EPI_ISL_960930, EPI_ISL_960931, EPI_ISL_960932, EPI_ISL_960933, EPI_ISL_960934, EPI_ISL_960944, EPI_ISL_960945, EPI_ISL_960946, EPI_ISL_960947, EPI_ISL_960948, EPI_ISL_960949, EPI_ISL_960950, EPI_ISL_960954, EPI_ISL_960956, EPI_ISL_960958, EPI_ISL_960959, EPI_ISL_960960, EPI_ISL_960961, EPI_ISL_960963, EPI_ISL_960964, EPI_ISL_960965, EPI_ISL_960968, EPI_ISL_960969, EPI_ISL_960970, EPI_ISL_960972, EPI_ISL_960973, EPI_ISL_960974, EPI_ISL_960975, EPI_ISL_960976, EPI_ISL_960977, EPI_ISL_960978, EPI_ISL_960979, EPI_ISL_960980                                                                                                                                                                                                 |                                                                                                           |                                                                           |                                                                                                                                                                                                                                                                                                                                                                                                          |
| see above                                                                                                                                                                                                                                                                                                                                                                                                                                                                                                                                                                                                                                                                                                                                                                                                                                                                                                                                                                                                                                                                                                                      | Medizinisches Labor Prof. Dr. Schenk/ Dr. Ansoerge & Kollegen, Magdeburg                                  | Institute of Medical Microbiology and Hospital Hygiene                    | Prof. Dr. Achim Kaasch, Aljoscha Tersteegen                                                                                                                                                                                                                                                                                                                                                              |
| EPI_ISL_961072, EPI_ISL_961073                                                                                                                                                                                                                                                                                                                                                                                                                                                                                                                                                                                                                                                                                                                                                                                                                                                                                                                                                                                                                                                                                                 | SIESP CHIETI - DRIVE IN CHIETI                                                                            | Istituto Zooprofilattico Sperimentale dell'Abruzzo e Molise "G. Caporale" | Lorusso A, Marcacci M, Di Domenico M, Ancora M, Curini V, Mangone I, Rinaldi A, Scialabba S, Di Pasquale A, Cammà C, Puglia I, Calistri P, Savini G                                                                                                                                                                                                                                                      |
| EPI_ISL_961075                                                                                                                                                                                                                                                                                                                                                                                                                                                                                                                                                                                                                                                                                                                                                                                                                                                                                                                                                                                                                                                                                                                 | SIESP DIPARTIMENTO DI PREVENZIONE CHIETI                                                                  | Istituto Zooprofilattico Sperimentale dell'Abruzzo e Molise "G. Caporale" | Lorusso A, Marcacci M, Di Domenico M, Ancora M, Curini V, Mangone I, Rinaldi A, Scialabba S, Di Pasquale A, Cammà C, Puglia I, Calistri P, Savini G                                                                                                                                                                                                                                                      |
| EPI_ISL_961083                                                                                                                                                                                                                                                                                                                                                                                                                                                                                                                                                                                                                                                                                                                                                                                                                                                                                                                                                                                                                                                                                                                 | DIP. PREV. AVEZZANO SERVIZIO DI IGIENE EPIDEMIOLOGIAE SANITA' PUBBLICA                                    | Istituto Zooprofilattico Sperimentale dell'Abruzzo e Molise "G. Caporale" | Lorusso A, Marcacci M, Di Domenico M, Ancora M, Curini V, Mangone I, Rinaldi A, Scialabba S, Di Pasquale A, Cammà C, Puglia I, Calistri P, Savini G                                                                                                                                                                                                                                                      |
| EPI_ISL_961084                                                                                                                                                                                                                                                                                                                                                                                                                                                                                                                                                                                                                                                                                                                                                                                                                                                                                                                                                                                                                                                                                                                 | SIESP TERAMO                                                                                              | Istituto Zooprofilattico Sperimentale dell'Abruzzo e Molise "G. Caporale" | Lorusso A, Marcacci M, Di Domenico M, Ancora M, Curini V, Mangone I, Rinaldi A, Scialabba S, Di Pasquale A, Cammà C, Puglia I, Calistri P, Savini G                                                                                                                                                                                                                                                      |
| EPI_ISL_961087, EPI_ISL_961089                                                                                                                                                                                                                                                                                                                                                                                                                                                                                                                                                                                                                                                                                                                                                                                                                                                                                                                                                                                                                                                                                                 | SIESP DIPARTIMENTO DI PREVENZIONE CHIETI                                                                  | Istituto Zooprofilattico Sperimentale dell'Abruzzo e Molise "G. Caporale" | Lorusso A, Marcacci M, Di Domenico M, Ancora M, Curini V, Mangone I, Rinaldi A, Scialabba S, Di Pasquale A, Cammà C, Puglia I, Calistri P, Savini G                                                                                                                                                                                                                                                      |
| EPI_ISL_961093                                                                                                                                                                                                                                                                                                                                                                                                                                                                                                                                                                                                                                                                                                                                                                                                                                                                                                                                                                                                                                                                                                                 | Ospedale SS Annunziata                                                                                    | Istituto Zooprofilattico Sperimentale dell'Abruzzo e Molise "G. Caporale" | Lorusso A, Marcacci M, Di Domenico M, Ancora M, Curini V, Mangone I, Rinaldi A, Scialabba S, Di Pasquale A, Cammà C, Puglia I, Calistri P, Savini G                                                                                                                                                                                                                                                      |
| EPI_ISL_961094                                                                                                                                                                                                                                                                                                                                                                                                                                                                                                                                                                                                                                                                                                                                                                                                                                                                                                                                                                                                                                                                                                                 | DIP. PREV. AVEZZANO SERVIZIO DI IGIENE EPIDEMIOLOGIAE SANITA' PUBBLICA                                    | Istituto Zooprofilattico Sperimentale dell'Abruzzo e Molise "G. Caporale" | Lorusso A, Marcacci M, Di Domenico M, Ancora M, Curini V, Mangone I, Rinaldi A, Scialabba S, Di Pasquale A, Cammà C, Puglia I, Calistri P, Savini G                                                                                                                                                                                                                                                      |
| EPI_ISL_961097, EPI_ISL_961098, EPI_ISL_961099, EPI_ISL_961101, EPI_ISL_961103                                                                                                                                                                                                                                                                                                                                                                                                                                                                                                                                                                                                                                                                                                                                                                                                                                                                                                                                                                                                                                                 | SIESP TERAMO                                                                                              | Istituto Zooprofilattico Sperimentale dell'Abruzzo e Molise "G. Caporale" | Lorusso A, Marcacci M, Di Domenico M, Ancora M, Curini V, Mangone I, Rinaldi A, Scialabba S, Di Pasquale A, Cammà C, Puglia I, Calistri P, Savini G                                                                                                                                                                                                                                                      |
| EPI_ISL_961130                                                                                                                                                                                                                                                                                                                                                                                                                                                                                                                                                                                                                                                                                                                                                                                                                                                                                                                                                                                                                                                                                                                 | Delaware Public Health Laboratory                                                                         | Delaware Public Health Lab                                                | Gregory Hovan                                                                                                                                                                                                                                                                                                                                                                                            |
| EPI_ISL_961215, EPI_ISL_961219, EPI_ISL_961227, EPI_ISL_961229, EPI_ISL_961232, EPI_ISL_961242, EPI_ISL_961243, EPI_ISL_961245, EPI_ISL_961249, EPI_ISL_961259, EPI_ISL_961260, EPI_ISL_961269, EPI_ISL_961280                                                                                                                                                                                                                                                                                                                                                                                                                                                                                                                                                                                                                                                                                                                                                                                                                                                                                                                 |                                                                                                           |                                                                           |                                                                                                                                                                                                                                                                                                                                                                                                          |
| see above                                                                                                                                                                                                                                                                                                                                                                                                                                                                                                                                                                                                                                                                                                                                                                                                                                                                                                                                                                                                                                                                                                                      | Hospital General Universitario de Alicante - Instituto de Investigación Sanitaria y Biomédica de Alicante | SeqCOVID-SPAIN consortium/IBV(CSIC)                                       | Maripaz Ventero Martín, Carmen Molina Pardines and SeqCOVID-SPAIN consortium                                                                                                                                                                                                                                                                                                                             |
| EPI_ISL_961355                                                                                                                                                                                                                                                                                                                                                                                                                                                                                                                                                                                                                                                                                                                                                                                                                                                                                                                                                                                                                                                                                                                 | Centrum voor Medische Analyse                                                                             | UAntwerp, Laboratory of Medical Microbiology                              | Basil Britto Xavier, Jasmine Coppens, Marie Le Mercier, Christine Lammens, Veerle Matheeuessen, Herman Goossens                                                                                                                                                                                                                                                                                          |
| EPI_ISL_961358, EPI_ISL_961359, EPI_ISL_961363, EPI_ISL_961370, EPI_ISL_961372, EPI_ISL_961376, EPI_ISL_961377, EPI_ISL_961378, EPI_ISL_961382, EPI_ISL_961385, EPI_ISL_961386, EPI_ISL_961387, EPI_ISL_961389, EPI_ISL_961392, EPI_ISL_961395, EPI_ISL_961396, EPI_ISL_961397, EPI_ISL_961398, EPI_ISL_961399, EPI_ISL_961400, EPI_ISL_961401, EPI_ISL_961402, EPI_ISL_961403, EPI_ISL_961404, EPI_ISL_961405, EPI_ISL_961406, EPI_ISL_961407, EPI_ISL_961409, EPI_ISL_961411, EPI_ISL_961412, EPI_ISL_961414, EPI_ISL_961416, EPI_ISL_961417, EPI_ISL_961418, EPI_ISL_961420, EPI_ISL_961421, EPI_ISL_961422, EPI_ISL_961424, EPI_ISL_961426, EPI_ISL_961428, EPI_ISL_961429, EPI_ISL_961430, EPI_ISL_961433, EPI_ISL_961434, EPI_ISL_961435, EPI_ISL_961436, EPI_ISL_961439, EPI_ISL_961440, EPI_ISL_961441, EPI_ISL_961445, EPI_ISL_961447, EPI_ISL_961448, EPI_ISL_961450, EPI_ISL_961452, EPI_ISL_961453, EPI_ISL_961454, EPI_ISL_961458, EPI_ISL_961460, EPI_ISL_961461, EPI_ISL_961462                                                                                                                                 |                                                                                                           |                                                                           |                                                                                                                                                                                                                                                                                                                                                                                                          |
| see above                                                                                                                                                                                                                                                                                                                                                                                                                                                                                                                                                                                                                                                                                                                                                                                                                                                                                                                                                                                                                                                                                                                      | Toronto Invasive Bacterial Diseases Network                                                               | McMaster University                                                       | Allison McGeer, Patryk Aftanas, Hooman Derakhshani, Angel Li, Kuganya Nirmalarajah, Emily Panousis, Ahmed Draia, Jalees Nasir, Michael Surette, Samira Mubareka, Andrew G. McArthur                                                                                                                                                                                                                      |
| EPI_ISL_961467, EPI_ISL_961468                                                                                                                                                                                                                                                                                                                                                                                                                                                                                                                                                                                                                                                                                                                                                                                                                                                                                                                                                                                                                                                                                                 | LESP Nuevo Leon/Grupo de Diagnostico ARIES                                                                | Instituto de Diagnostico y Referencia Epidemiologicos (INDRE)             | Claudia Wong-Arambula, Abril Rodriguez-Maldonado, Fabiola Garces-Ayala, Natividad Cruz-Ortiz, Tatiana Nunez-Garcia, Gisela Barrera-Badillo, Lucia Hernandez-Rivas, Irma Lopez-Martinez, Ernesto Ramirez-Gonzalez.                                                                                                                                                                                        |
| EPI_ISL_961580, EPI_ISL_961581, EPI_ISL_961582, EPI_ISL_961583, EPI_ISL_961584, EPI_ISL_961585, EPI_ISL_961586, EPI_ISL_961587, EPI_ISL_961589, EPI_ISL_961590, EPI_ISL_961591, EPI_ISL_961592, EPI_ISL_961593, EPI_ISL_961594, EPI_ISL_961595, EPI_ISL_961596, EPI_ISL_961597, EPI_ISL_961603, EPI_ISL_961604, EPI_ISL_961605, EPI_ISL_961606, EPI_ISL_961610, EPI_ISL_961611, EPI_ISL_961612, EPI_ISL_961613, EPI_ISL_961614, EPI_ISL_961615, EPI_ISL_961616, EPI_ISL_961617, EPI_ISL_961618, EPI_ISL_961619, EPI_ISL_961620, EPI_ISL_961621, EPI_ISL_961622, EPI_ISL_961623, EPI_ISL_961624, EPI_ISL_961625, EPI_ISL_961626, EPI_ISL_961627, EPI_ISL_961628, EPI_ISL_961629, EPI_ISL_961630, EPI_ISL_961631, EPI_ISL_961632, EPI_ISL_961633, EPI_ISL_961635, EPI_ISL_961636, EPI_ISL_961637, EPI_ISL_961638, EPI_ISL_961639, EPI_ISL_961640, EPI_ISL_961641, EPI_ISL_961642, EPI_ISL_961651, EPI_ISL_961652, EPI_ISL_961653, EPI_ISL_961654, EPI_ISL_961655, EPI_ISL_961656, EPI_ISL_961658, EPI_ISL_961659, EPI_ISL_961660                                                                                                 |                                                                                                           |                                                                           |                                                                                                                                                                                                                                                                                                                                                                                                          |
| see above                                                                                                                                                                                                                                                                                                                                                                                                                                                                                                                                                                                                                                                                                                                                                                                                                                                                                                                                                                                                                                                                                                                      | Hôpital Georges L. Dumont                                                                                 | National Microbiology Laboratory (NML)                                    | Anna Majer, Shari Tyson, Grace Seo, Philip Mabon, Elsie Grudeski, Rhiannon Huzarewich, Russell Mandes, Anneliese Landgraff, Jennifer Tanner, Natalie Knox, Morag Graham, Gary Van Domselaar, Richard Garceau, Guillaume Desnoyers, Nathalie Bastien, Yan Li, Timothy Booth, Darian Hole, Madison Chapel, Kirsten Biggar, CanCOGeN's metadata curation team, Public Health Agency of Canada CanCOGeN team |
| EPI_ISL_961752                                                                                                                                                                                                                                                                                                                                                                                                                                                                                                                                                                                                                                                                                                                                                                                                                                                                                                                                                                                                                                                                                                                 | SIESP SULMONA                                                                                             | Istituto Zooprofilattico Sperimentale dell'Abruzzo e Molise "G. Caporale" | Lorusso A, Marcacci M, Di Domenico M, Ancora M, Curini V, Mangone I, Rinaldi A, Scialabba S, Di Pasquale A, Cammà C, Puglia I, Calistri P, Savini G                                                                                                                                                                                                                                                      |
| EPI_ISL_961754                                                                                                                                                                                                                                                                                                                                                                                                                                                                                                                                                                                                                                                                                                                                                                                                                                                                                                                                                                                                                                                                                                                 | Presidio Ospedaliero Sulmona                                                                              | Istituto Zooprofilattico Sperimentale dell'Abruzzo e Molise "G. Caporale" | Lorusso A, Marcacci M, Di Domenico M, Ancora M, Curini V, Mangone I, Rinaldi A, Scialabba S, Di Pasquale A, Cammà C, Puglia I, Calistri P, Savini G                                                                                                                                                                                                                                                      |
| EPI_ISL_961755, EPI_ISL_961757                                                                                                                                                                                                                                                                                                                                                                                                                                                                                                                                                                                                                                                                                                                                                                                                                                                                                                                                                                                                                                                                                                 | SIESP SULMONA                                                                                             | Istituto Zooprofilattico Sperimentale dell'Abruzzo e Molise "G. Caporale" | Lorusso A, Marcacci M, Di Domenico M, Ancora M, Curini V, Mangone I, Rinaldi A, Scialabba S, Di Pasquale A, Cammà C, Puglia I, Calistri P, Savini G                                                                                                                                                                                                                                                      |
| EPI_ISL_961804                                                                                                                                                                                                                                                                                                                                                                                                                                                                                                                                                                                                                                                                                                                                                                                                                                                                                                                                                                                                                                                                                                                 | E. Gulbja laboratorija                                                                                    | Latvian Biomedical Research and Study Centre                              | Janis Pjalkovskis, Nikita Zrelavs, Monta Ustinova, Ivars Silamikelis, Liga Birzniece, Kaspars Megnis, Vita Rovite, Lauma Freimane, Laila Silamikele, Laura Ansona, Davids Fridmanis, Mikus Gavars, Dmitrijs Perminovs, Jurisjs Perevoscikovs, Uga Dumpis, Janis Klovins                                                                                                                                  |
| EPI_ISL_961805                                                                                                                                                                                                                                                                                                                                                                                                                                                                                                                                                                                                                                                                                                                                                                                                                                                                                                                                                                                                                                                                                                                 | Centrālā laboratorija                                                                                     | Latvian Biomedical Research and Study Centre                              | Janis Pjalkovskis, Nikita Zrelavs, Monta Ustinova, Ivars Silamikelis, Liga Birzniece, Kaspars Megnis, Vita Rovite, Lauma Freimane, Laila Silamikele, Laura Ansona, Davids Fridmanis, Marta Priedite, Jana Osite, Jurisjs Perevoscikovs, Uga Dumpis, Janis Klovins                                                                                                                                        |

|                                                                                                                                                                                                                                                                                                                                                                                                                                                                                                                                                                                                 |                                                                                                                                |                                                                                                                                |                                                                                                                                                                                                                                                                                                                                                                                                                                                                                                                                                                                                                                                                                                                                                                 |
|-------------------------------------------------------------------------------------------------------------------------------------------------------------------------------------------------------------------------------------------------------------------------------------------------------------------------------------------------------------------------------------------------------------------------------------------------------------------------------------------------------------------------------------------------------------------------------------------------|--------------------------------------------------------------------------------------------------------------------------------|--------------------------------------------------------------------------------------------------------------------------------|-----------------------------------------------------------------------------------------------------------------------------------------------------------------------------------------------------------------------------------------------------------------------------------------------------------------------------------------------------------------------------------------------------------------------------------------------------------------------------------------------------------------------------------------------------------------------------------------------------------------------------------------------------------------------------------------------------------------------------------------------------------------|
| EPI_ISL_961807                                                                                                                                                                                                                                                                                                                                                                                                                                                                                                                                                                                  | E. Gulbja laboratorija                                                                                                         | Latvian Biomedical Research and Study Centre                                                                                   | Janis Pjalkovskis, Nikita Zrelavs, Monta Ustinova, Ivars Silamikelis, Liga Birzniece, Kaspars Megnis, Vita Rovite, Lauma Freimane, Laila Silamikele, Laura Ansone, Davids Fridmanis, Mikus Gavars, Dmitrijs Perminovs, Jurisjs Perevoscikovs, Uga Dumpis, Janis Klovins                                                                                                                                                                                                                                                                                                                                                                                                                                                                                         |
| EPI_ISL_961809, EPI_ISL_961810, EPI_ISL_961811, EPI_ISL_961812, EPI_ISL_961813, EPI_ISL_961814, EPI_ISL_961815, EPI_ISL_961816, EPI_ISL_961817, EPI_ISL_961818, EPI_ISL_961819, EPI_ISL_961820, EPI_ISL_961821, EPI_ISL_961822, EPI_ISL_961823, EPI_ISL_961824, EPI_ISL_961825, EPI_ISL_961826, EPI_ISL_961827, EPI_ISL_961828, EPI_ISL_961829, EPI_ISL_961830                                                                                                                                                                                                                                  |                                                                                                                                |                                                                                                                                |                                                                                                                                                                                                                                                                                                                                                                                                                                                                                                                                                                                                                                                                                                                                                                 |
| see above                                                                                                                                                                                                                                                                                                                                                                                                                                                                                                                                                                                       | Centrala laboratorija                                                                                                          | Latvian Biomedical Research and Study Centre                                                                                   | Janis Pjalkovskis, Nikita Zrelavs, Monta Ustinova, Ivars Silamikelis, Liga Birzniece, Kaspars Megnis, Vita Rovite, Lauma Freimane, Laila Silamikele, Laura Ansone, Davids Fridmanis, Marta Priedite, Jana Osite, Jurisjs Perevoscikovs, Uga Dumpis, Janis Klovins                                                                                                                                                                                                                                                                                                                                                                                                                                                                                               |
| EPI_ISL_961831                                                                                                                                                                                                                                                                                                                                                                                                                                                                                                                                                                                  | Latvijas Infektologijas Centrs                                                                                                 | Latvian Biomedical Research and Study Centre                                                                                   | Janis Pjalkovskis, Nikita Zrelavs, Monta Ustinova, Ivars Silamikelis, Liga Birzniece, Kaspars Megnis, Vita Rovite, Lauma Freimane, Laila Silamikele, Laura Ansone, Davids Fridmanis, Reinis Zeltmatis, Diana Dusacka, Jurisjs Perevoscikovs, Uga Dumpis, Janis Klovins                                                                                                                                                                                                                                                                                                                                                                                                                                                                                          |
| EPI_ISL_961832                                                                                                                                                                                                                                                                                                                                                                                                                                                                                                                                                                                  | E. Gulbja laboratorija                                                                                                         | Latvian Biomedical Research and Study Centre                                                                                   | Janis Pjalkovskis, Nikita Zrelavs, Monta Ustinova, Ivars Silamikelis, Liga Birzniece, Kaspars Megnis, Vita Rovite, Lauma Freimane, Laila Silamikele, Laura Ansone, Davids Fridmanis, Mikus Gavars, Dmitrijs Perminovs, Jurisjs Perevoscikovs, Uga Dumpis, Janis Klovins                                                                                                                                                                                                                                                                                                                                                                                                                                                                                         |
| EPI_ISL_961833, EPI_ISL_961834, EPI_ISL_961835, EPI_ISL_961836, EPI_ISL_961837, EPI_ISL_961838, EPI_ISL_961839, EPI_ISL_961840, EPI_ISL_961841, EPI_ISL_961842, EPI_ISL_961843, EPI_ISL_961844, EPI_ISL_961845, EPI_ISL_961846, EPI_ISL_961847, EPI_ISL_961848, EPI_ISL_961849, EPI_ISL_961850, EPI_ISL_961851                                                                                                                                                                                                                                                                                  |                                                                                                                                |                                                                                                                                |                                                                                                                                                                                                                                                                                                                                                                                                                                                                                                                                                                                                                                                                                                                                                                 |
| see above                                                                                                                                                                                                                                                                                                                                                                                                                                                                                                                                                                                       | Centrala laboratorija                                                                                                          | Latvian Biomedical Research and Study Centre                                                                                   | Janis Pjalkovskis, Nikita Zrelavs, Monta Ustinova, Ivars Silamikelis, Liga Birzniece, Kaspars Megnis, Vita Rovite, Lauma Freimane, Laila Silamikele, Laura Ansone, Davids Fridmanis, Reinis Zeltmatis, Diana Dusacka, Jurisjs Perevoscikovs, Uga Dumpis, Janis Klovins                                                                                                                                                                                                                                                                                                                                                                                                                                                                                          |
| EPI_ISL_961852                                                                                                                                                                                                                                                                                                                                                                                                                                                                                                                                                                                  | Latvijas Infektologijas Centrs                                                                                                 | Latvian Biomedical Research and Study Centre                                                                                   | Janis Pjalkovskis, Nikita Zrelavs, Monta Ustinova, Ivars Silamikelis, Liga Birzniece, Kaspars Megnis, Vita Rovite, Lauma Freimane, Laila Silamikele, Laura Ansone, Davids Fridmanis, Reinis Zeltmatis, Diana Dusacka, Jurisjs Perevoscikovs, Uga Dumpis, Janis Klovins                                                                                                                                                                                                                                                                                                                                                                                                                                                                                          |
| EPI_ISL_961853, EPI_ISL_961854, EPI_ISL_961855, EPI_ISL_961856, EPI_ISL_961857, EPI_ISL_961858, EPI_ISL_961859, EPI_ISL_961860, EPI_ISL_961861                                                                                                                                                                                                                                                                                                                                                                                                                                                  | E. Gulbja laboratorija                                                                                                         | Latvian Biomedical Research and Study Centre                                                                                   | Janis Pjalkovskis, Nikita Zrelavs, Monta Ustinova, Ivars Silamikelis, Liga Birzniece, Kaspars Megnis, Vita Rovite, Lauma Freimane, Laila Silamikele, Laura Ansone, Davids Fridmanis, Mikus Gavars, Dmitrijs Perminovs, Jurisjs Perevoscikovs, Uga Dumpis, Janis Klovins                                                                                                                                                                                                                                                                                                                                                                                                                                                                                         |
| EPI_ISL_961862, EPI_ISL_961863                                                                                                                                                                                                                                                                                                                                                                                                                                                                                                                                                                  | Latvijas Infektologijas Centrs                                                                                                 | Latvian Biomedical Research and Study Centre                                                                                   | Janis Pjalkovskis, Nikita Zrelavs, Monta Ustinova, Ivars Silamikelis, Liga Birzniece, Kaspars Megnis, Vita Rovite, Lauma Freimane, Laila Silamikele, Laura Ansone, Davids Fridmanis, Reinis Zeltmatis, Diana Dusacka, Jurisjs Perevoscikovs, Uga Dumpis, Janis Klovins                                                                                                                                                                                                                                                                                                                                                                                                                                                                                          |
| EPI_ISL_961864, EPI_ISL_961865                                                                                                                                                                                                                                                                                                                                                                                                                                                                                                                                                                  | E. Gulbja laboratorija                                                                                                         | Latvian Biomedical Research and Study Centre                                                                                   | Janis Pjalkovskis, Nikita Zrelavs, Monta Ustinova, Ivars Silamikelis, Liga Birzniece, Kaspars Megnis, Vita Rovite, Lauma Freimane, Laila Silamikele, Laura Ansone, Davids Fridmanis, Mikus Gavars, Dmitrijs Perminovs, Jurisjs Perevoscikovs, Uga Dumpis, Janis Klovins                                                                                                                                                                                                                                                                                                                                                                                                                                                                                         |
| EPI_ISL_961866                                                                                                                                                                                                                                                                                                                                                                                                                                                                                                                                                                                  | Latvijas Infektologijas Centrs                                                                                                 | Latvian Biomedical Research and Study Centre                                                                                   | Janis Pjalkovskis, Nikita Zrelavs, Monta Ustinova, Ivars Silamikelis, Liga Birzniece, Kaspars Megnis, Vita Rovite, Lauma Freimane, Laila Silamikele, Laura Ansone, Davids Fridmanis, Reinis Zeltmatis, Diana Dusacka, Jurisjs Perevoscikovs, Uga Dumpis, Janis Klovins                                                                                                                                                                                                                                                                                                                                                                                                                                                                                          |
| EPI_ISL_961867, EPI_ISL_961868                                                                                                                                                                                                                                                                                                                                                                                                                                                                                                                                                                  | E. Gulbja laboratorija                                                                                                         | Latvian Biomedical Research and Study Centre                                                                                   | Janis Pjalkovskis, Nikita Zrelavs, Monta Ustinova, Ivars Silamikelis, Liga Birzniece, Kaspars Megnis, Vita Rovite, Lauma Freimane, Laila Silamikele, Laura Ansone, Davids Fridmanis, Mikus Gavars, Dmitrijs Perminovs, Jurisjs Perevoscikovs, Uga Dumpis, Janis Klovins                                                                                                                                                                                                                                                                                                                                                                                                                                                                                         |
| EPI_ISL_961869, EPI_ISL_961870                                                                                                                                                                                                                                                                                                                                                                                                                                                                                                                                                                  | Latvijas Infektologijas Centrs                                                                                                 | Latvian Biomedical Research and Study Centre                                                                                   | Janis Pjalkovskis, Nikita Zrelavs, Monta Ustinova, Ivars Silamikelis, Liga Birzniece, Kaspars Megnis, Vita Rovite, Lauma Freimane, Laila Silamikele, Laura Ansone, Davids Fridmanis, Reinis Zeltmatis, Diana Dusacka, Jurisjs Perevoscikovs, Uga Dumpis, Janis Klovins                                                                                                                                                                                                                                                                                                                                                                                                                                                                                          |
| EPI_ISL_961871, EPI_ISL_961872, EPI_ISL_961873, EPI_ISL_961874, EPI_ISL_961875                                                                                                                                                                                                                                                                                                                                                                                                                                                                                                                  | E. Gulbja laboratorija                                                                                                         | Latvian Biomedical Research and Study Centre                                                                                   | Janis Pjalkovskis, Nikita Zrelavs, Monta Ustinova, Ivars Silamikelis, Liga Birzniece, Kaspars Megnis, Vita Rovite, Lauma Freimane, Laila Silamikele, Laura Ansone, Davids Fridmanis, Mikus Gavars, Dmitrijs Perminovs, Jurisjs Perevoscikovs, Uga Dumpis, Janis Klovins                                                                                                                                                                                                                                                                                                                                                                                                                                                                                         |
| EPI_ISL_961876                                                                                                                                                                                                                                                                                                                                                                                                                                                                                                                                                                                  | Latvijas Infektologijas Centrs                                                                                                 | Latvian Biomedical Research and Study Centre                                                                                   | Janis Pjalkovskis, Nikita Zrelavs, Monta Ustinova, Ivars Silamikelis, Liga Birzniece, Kaspars Megnis, Vita Rovite, Lauma Freimane, Laila Silamikele, Laura Ansone, Davids Fridmanis, Reinis Zeltmatis, Diana Dusacka, Jurisjs Perevoscikovs, Uga Dumpis, Janis Klovins                                                                                                                                                                                                                                                                                                                                                                                                                                                                                          |
| EPI_ISL_961877, EPI_ISL_961878, EPI_ISL_961879, EPI_ISL_961880                                                                                                                                                                                                                                                                                                                                                                                                                                                                                                                                  | E. Gulbja laboratorija                                                                                                         | Latvian Biomedical Research and Study Centre                                                                                   | Janis Pjalkovskis, Nikita Zrelavs, Monta Ustinova, Ivars Silamikelis, Liga Birzniece, Kaspars Megnis, Vita Rovite, Lauma Freimane, Laila Silamikele, Laura Ansone, Davids Fridmanis, Mikus Gavars, Dmitrijs Perminovs, Jurisjs Perevoscikovs, Uga Dumpis, Janis Klovins                                                                                                                                                                                                                                                                                                                                                                                                                                                                                         |
| EPI_ISL_962121, EPI_ISL_962133, EPI_ISL_962145, EPI_ISL_962176                                                                                                                                                                                                                                                                                                                                                                                                                                                                                                                                  | Illinois Department of Public Health                                                                                           | Gagnon Lab, Southern Illinois University                                                                                       | Keith Gagnon                                                                                                                                                                                                                                                                                                                                                                                                                                                                                                                                                                                                                                                                                                                                                    |
| EPI_ISL_962182                                                                                                                                                                                                                                                                                                                                                                                                                                                                                                                                                                                  | Ohio Department of Health Laboratory                                                                                           | Ohio Department of Health Laboratory                                                                                           | Holmes, Jennifer; Eric Brandt, Keoni Omura, Glen McGillivray, Caitlin McDonnell, Jade Mowery, Stephanie Mccracken, Tyler Payne, Kirtana Ramadugu, Erica Leasure, Brent Lee, Kelsey Florek, Heather Blankenship, Quantia Brown, and Tammy Bannerman                                                                                                                                                                                                                                                                                                                                                                                                                                                                                                              |
| EPI_ISL_962183, EPI_ISL_962186, EPI_ISL_962187, EPI_ISL_962189, EPI_ISL_962190, EPI_ISL_962193, EPI_ISL_962196, EPI_ISL_962197, EPI_ISL_962198, EPI_ISL_962199, EPI_ISL_962200, EPI_ISL_962201, EPI_ISL_962202                                                                                                                                                                                                                                                                                                                                                                                  |                                                                                                                                |                                                                                                                                |                                                                                                                                                                                                                                                                                                                                                                                                                                                                                                                                                                                                                                                                                                                                                                 |
| see above                                                                                                                                                                                                                                                                                                                                                                                                                                                                                                                                                                                       | Toronto Invasive Bacterial Diseases Network                                                                                    | McMaster University                                                                                                            | Allison McGeer, Patryk Aftanas, Hooman Derakhshani, Angel Li, Kuganya Nirmalarajah, Emily Panousis, Ahmed Draia, Jalees Nasir, Michael Surette, Samira Mubareka, Andrew G. McArthur                                                                                                                                                                                                                                                                                                                                                                                                                                                                                                                                                                             |
| EPI_ISL_962203, EPI_ISL_962204, EPI_ISL_962205, EPI_ISL_962206, EPI_ISL_962207                                                                                                                                                                                                                                                                                                                                                                                                                                                                                                                  | Institute for Medical Research, Infectious Disease Research Centre, National Institutes of Health, Ministry of Health Malaysia | Institute for Medical Research, Infectious Disease Research Centre, National Institutes of Health, Ministry of Health Malaysia | Suppiah J, Kamel K, Azizan MA, Thayan R                                                                                                                                                                                                                                                                                                                                                                                                                                                                                                                                                                                                                                                                                                                         |
| EPI_ISL_962274                                                                                                                                                                                                                                                                                                                                                                                                                                                                                                                                                                                  | Seattle Flu Study                                                                                                              | Seattle Flu Study                                                                                                              | Deborah A. Nickerson, Chris D. Frazer, Jover Lee, Benjamin Pelle, Erica Ryke, Matthew Richardson, Amanda Adler, Elisabeth Brandstetter, Peter D. Han, Kairsten Fay, Misja Ilcisin, Kirsten Lacombe, Thomas R. Sibley, Melissa Truong, Caitlin R. Wolf, Michael Boeckh, Janet A. Englund, Michael Famulare, Barry R. Lutz, Mark J. Rieder, Lea M. Starita, Matthew Thompson, Jay Shendure, Trevor Bedford, Helen Y. Chu                                                                                                                                                                                                                                                                                                                                          |
| EPI_ISL_962308                                                                                                                                                                                                                                                                                                                                                                                                                                                                                                                                                                                  | Altius Institute for Biomedical Sciences                                                                                       | Seattle Flu Study                                                                                                              | Deborah A. Nickerson, Chris D. Frazer, Jover Lee, Benjamin Pelle, Erica Ryke, Matthew Richardson, Amanda Adler, Elisabeth Brandstetter, Peter D. Han, Kairsten Fay, Misja Ilcisin, Kirsten Lacombe, Thomas R. Sibley, Melissa Truong, Caitlin R. Wolf, Ryan Alexander, Daniel Bates, Rebecca Bruders, Stephanie DeBaun, Clem Green, Muhammad Halimun, Jessica Halow, Kneshay Harper, Matt Hartman, Andrew Meuser, Alex Nguyen, Truong Nguyen, Sofia Olsson, Sadie Patraw, Hannah Petersen, Tobias Ragocz, Joshua Richards, Jacob Rodriguez, John Stamatoyannopoulos, Julia Wald, Olivia Waltnr, Michael Boeckh, Janet A. Englund, Michael Famulare, Barry R. Lutz, Mark J. Rieder, Lea M. Starita, Matthew Thompson, Helen Y. Chu, Jay Shendure, Trevor Bedford |
| EPI_ISL_962407, EPI_ISL_962437                                                                                                                                                                                                                                                                                                                                                                                                                                                                                                                                                                  | Washington State Department of Health                                                                                          | Seattle Flu Study                                                                                                              | Deborah A. Nickerson, Chris D. Frazer, Jover Lee, Benjamin Pelle, Erica Ryke, Matthew Richardson, Amanda Adler, Elisabeth Brandstetter, Peter D. Han, Kairsten Fay, Misja Ilcisin, Kirsten Lacombe, Thomas R. Sibley, Melissa Truong, Caitlin R. Wolf, Romesh Gautom, Geoff Melly, Brian Hiatt, Philip Dykema, Scott Lindquist, Michael Boeckh, Janet A. Englund, Michael Famulare, Barry R. Lutz, Mark J. Rieder, Lea M. Starita, Matthew Thompson, Helen Y. Chu, Jay Shendure, Trevor Bedford                                                                                                                                                                                                                                                                 |
| EPI_ISL_962509, EPI_ISL_962521                                                                                                                                                                                                                                                                                                                                                                                                                                                                                                                                                                  | UCLA Clinical Micro Lab                                                                                                        | Los Angeles County PHL                                                                                                         | P. Hemarajata et al.                                                                                                                                                                                                                                                                                                                                                                                                                                                                                                                                                                                                                                                                                                                                            |
| EPI_ISL_962523, EPI_ISL_962524, EPI_ISL_962525, EPI_ISL_962526, EPI_ISL_962527                                                                                                                                                                                                                                                                                                                                                                                                                                                                                                                  | Institute for Medical Research, Infectious Disease Research Centre, National Institutes of Health, Ministry of Health Malaysia | Institute for Medical Research, Infectious Disease Research Centre, National Institutes of Health, Ministry of Health Malaysia | Suppiah J, Kamel K, Azizan MA, Thayan R                                                                                                                                                                                                                                                                                                                                                                                                                                                                                                                                                                                                                                                                                                                         |
| EPI_ISL_962603, EPI_ISL_962605, EPI_ISL_962606, EPI_ISL_962608                                                                                                                                                                                                                                                                                                                                                                                                                                                                                                                                  | Sharp HealthCare Laboratory                                                                                                    | Andersen lab at Scripps Research                                                                                               | SEARCH Alliance San Diego with Aaron Harding, Jacquelyn Berumen, Cathy Woerle, Liam McGinnis, Art Mendoza, Omid Bakhtar                                                                                                                                                                                                                                                                                                                                                                                                                                                                                                                                                                                                                                         |
| EPI_ISL_962618, EPI_ISL_962619, EPI_ISL_962620, EPI_ISL_962621, EPI_ISL_962622, EPI_ISL_962626, EPI_ISL_962627, EPI_ISL_962628, EPI_ISL_962629, EPI_ISL_962630, EPI_ISL_962631, EPI_ISL_962632, EPI_ISL_962633, EPI_ISL_962634, EPI_ISL_962635, EPI_ISL_962637, EPI_ISL_962638, EPI_ISL_962639, EPI_ISL_962640, EPI_ISL_962641, EPI_ISL_962642, EPI_ISL_962643, EPI_ISL_962644, EPI_ISL_962645, EPI_ISL_962646, EPI_ISL_962649                                                                                                                                                                  |                                                                                                                                |                                                                                                                                |                                                                                                                                                                                                                                                                                                                                                                                                                                                                                                                                                                                                                                                                                                                                                                 |
| see above                                                                                                                                                                                                                                                                                                                                                                                                                                                                                                                                                                                       | Scripps Medical Laboratory                                                                                                     | Andersen lab at Scripps Research                                                                                               | SEARCH Alliance San Diego with Michael Quigley, Ellen Stefanski, Ian Mchardy                                                                                                                                                                                                                                                                                                                                                                                                                                                                                                                                                                                                                                                                                    |
| EPI_ISL_962650, EPI_ISL_962651, EPI_ISL_962652, EPI_ISL_962654, EPI_ISL_962655, EPI_ISL_962656, EPI_ISL_962657, EPI_ISL_962658, EPI_ISL_962659, EPI_ISL_962660, EPI_ISL_962661, EPI_ISL_962662, EPI_ISL_962663, EPI_ISL_962664, EPI_ISL_962665, EPI_ISL_962666, EPI_ISL_962667, EPI_ISL_962668, EPI_ISL_962669, EPI_ISL_962670, EPI_ISL_962671, EPI_ISL_962672, EPI_ISL_962673, EPI_ISL_962674, EPI_ISL_962675, EPI_ISL_962676, EPI_ISL_962677, EPI_ISL_962678, EPI_ISL_962679, EPI_ISL_962680, EPI_ISL_962681, EPI_ISL_962682, EPI_ISL_962683, EPI_ISL_962684, EPI_ISL_962685, EPI_ISL_962686, |                                                                                                                                |                                                                                                                                |                                                                                                                                                                                                                                                                                                                                                                                                                                                                                                                                                                                                                                                                                                                                                                 |



[illegible]

[illegible]



|                                                                                                                                                                                                                                                                                                                                                                                                                                                                                                                                                                                                                                                                                                                                                                                                                                                                                                                                                                                                                                                                                                                                                                                                                                                                                                                                                                                                                                                                                                                                                                                                                                                                                                                                                                                                                                                                                                                                                                                                                                                                                                                                                                                                                                                                                                                                                                                                                                                                                                                                                                                                                                                                                                                                                                                                                                                                                                                                                                                                                                                                                                                                                                                                                                                                                                                                                                                                                                                                                                                                                                                                                                                                                                                                                |                                                                                          |                                                                                                            |                                                                                                                                                                                                                                                                                                                                 |
|------------------------------------------------------------------------------------------------------------------------------------------------------------------------------------------------------------------------------------------------------------------------------------------------------------------------------------------------------------------------------------------------------------------------------------------------------------------------------------------------------------------------------------------------------------------------------------------------------------------------------------------------------------------------------------------------------------------------------------------------------------------------------------------------------------------------------------------------------------------------------------------------------------------------------------------------------------------------------------------------------------------------------------------------------------------------------------------------------------------------------------------------------------------------------------------------------------------------------------------------------------------------------------------------------------------------------------------------------------------------------------------------------------------------------------------------------------------------------------------------------------------------------------------------------------------------------------------------------------------------------------------------------------------------------------------------------------------------------------------------------------------------------------------------------------------------------------------------------------------------------------------------------------------------------------------------------------------------------------------------------------------------------------------------------------------------------------------------------------------------------------------------------------------------------------------------------------------------------------------------------------------------------------------------------------------------------------------------------------------------------------------------------------------------------------------------------------------------------------------------------------------------------------------------------------------------------------------------------------------------------------------------------------------------------------------------------------------------------------------------------------------------------------------------------------------------------------------------------------------------------------------------------------------------------------------------------------------------------------------------------------------------------------------------------------------------------------------------------------------------------------------------------------------------------------------------------------------------------------------------------------------------------------------------------------------------------------------------------------------------------------------------------------------------------------------------------------------------------------------------------------------------------------------------------------------------------------------------------------------------------------------------------------------------------------------------------------------------------------------------|------------------------------------------------------------------------------------------|------------------------------------------------------------------------------------------------------------|---------------------------------------------------------------------------------------------------------------------------------------------------------------------------------------------------------------------------------------------------------------------------------------------------------------------------------|
| EPI_ISL_964491, EPI_ISL_964492, EPI_ISL_964496, EPI_ISL_964497, EPI_ISL_964498, EPI_ISL_964505, EPI_ISL_964506, EPI_ISL_964507, EPI_ISL_964510                                                                                                                                                                                                                                                                                                                                                                                                                                                                                                                                                                                                                                                                                                                                                                                                                                                                                                                                                                                                                                                                                                                                                                                                                                                                                                                                                                                                                                                                                                                                                                                                                                                                                                                                                                                                                                                                                                                                                                                                                                                                                                                                                                                                                                                                                                                                                                                                                                                                                                                                                                                                                                                                                                                                                                                                                                                                                                                                                                                                                                                                                                                                                                                                                                                                                                                                                                                                                                                                                                                                                                                                 | Lighthouse Lab in Milton Keynes                                                          | Wellcome Sanger Institute for the COVID-19 Genomics UK (COG-UK) Consortium                                 | The Lighthouse Lab in Milton Keynes and Alex Alderton, Roberto Amato, Sonia Goncalves, Ewan Harrison, David K. Jackson, Ian Johnston, Dominic Kwiatkowski, Cordelia Langford, John Sillitoe on behalf of the Wellcome Sanger Institute COVID-19 Surveillance Team                                                               |
| EPI_ISL_964512                                                                                                                                                                                                                                                                                                                                                                                                                                                                                                                                                                                                                                                                                                                                                                                                                                                                                                                                                                                                                                                                                                                                                                                                                                                                                                                                                                                                                                                                                                                                                                                                                                                                                                                                                                                                                                                                                                                                                                                                                                                                                                                                                                                                                                                                                                                                                                                                                                                                                                                                                                                                                                                                                                                                                                                                                                                                                                                                                                                                                                                                                                                                                                                                                                                                                                                                                                                                                                                                                                                                                                                                                                                                                                                                 | Lighthouse Lab in Glasgow                                                                | Wellcome Sanger Institute for the COVID-19 Genomics UK (COG-UK) Consortium                                 | Harper VanSteenhouse, Yumi Kasai, David Gray, Carol Clugston, Anna Dominiczak and Alex Alderton, Roberto Amato, Sonia Goncalves, Ewan Harrison, David K. Jackson, Ian Johnston, Dominic Kwiatkowski, Cordelia Langford, John Sillitoe on behalf of the Wellcome Sanger Institute COVID-19 Surveillance Team                     |
| EPI_ISL_964513, EPI_ISL_964515, EPI_ISL_964517, EPI_ISL_964519, EPI_ISL_964522, EPI_ISL_964524                                                                                                                                                                                                                                                                                                                                                                                                                                                                                                                                                                                                                                                                                                                                                                                                                                                                                                                                                                                                                                                                                                                                                                                                                                                                                                                                                                                                                                                                                                                                                                                                                                                                                                                                                                                                                                                                                                                                                                                                                                                                                                                                                                                                                                                                                                                                                                                                                                                                                                                                                                                                                                                                                                                                                                                                                                                                                                                                                                                                                                                                                                                                                                                                                                                                                                                                                                                                                                                                                                                                                                                                                                                 | Lighthouse Lab in Milton Keynes                                                          | Wellcome Sanger Institute for the COVID-19 Genomics UK (COG-UK) Consortium                                 | The Lighthouse Lab in Milton Keynes and Alex Alderton, Roberto Amato, Sonia Goncalves, Ewan Harrison, David K. Jackson, Ian Johnston, Dominic Kwiatkowski, Cordelia Langford, John Sillitoe on behalf of the Wellcome Sanger Institute COVID-19 Surveillance Team                                                               |
| EPI_ISL_964528                                                                                                                                                                                                                                                                                                                                                                                                                                                                                                                                                                                                                                                                                                                                                                                                                                                                                                                                                                                                                                                                                                                                                                                                                                                                                                                                                                                                                                                                                                                                                                                                                                                                                                                                                                                                                                                                                                                                                                                                                                                                                                                                                                                                                                                                                                                                                                                                                                                                                                                                                                                                                                                                                                                                                                                                                                                                                                                                                                                                                                                                                                                                                                                                                                                                                                                                                                                                                                                                                                                                                                                                                                                                                                                                 | Lighthouse Lab in Glasgow                                                                | Wellcome Sanger Institute for the COVID-19 Genomics UK (COG-UK) Consortium                                 | Harper VanSteenhouse, Yumi Kasai, David Gray, Carol Clugston, Anna Dominiczak and Alex Alderton, Roberto Amato, Sonia Goncalves, Ewan Harrison, David K. Jackson, Ian Johnston, Dominic Kwiatkowski, Cordelia Langford, John Sillitoe on behalf of the Wellcome Sanger Institute COVID-19 Surveillance Team                     |
| EPI_ISL_964529, EPI_ISL_964531, EPI_ISL_964534, EPI_ISL_964536, EPI_ISL_964538                                                                                                                                                                                                                                                                                                                                                                                                                                                                                                                                                                                                                                                                                                                                                                                                                                                                                                                                                                                                                                                                                                                                                                                                                                                                                                                                                                                                                                                                                                                                                                                                                                                                                                                                                                                                                                                                                                                                                                                                                                                                                                                                                                                                                                                                                                                                                                                                                                                                                                                                                                                                                                                                                                                                                                                                                                                                                                                                                                                                                                                                                                                                                                                                                                                                                                                                                                                                                                                                                                                                                                                                                                                                 | Lighthouse Lab in Milton Keynes                                                          | Wellcome Sanger Institute for the COVID-19 Genomics UK (COG-UK) Consortium                                 | The Lighthouse Lab in Milton Keynes and Alex Alderton, Roberto Amato, Sonia Goncalves, Ewan Harrison, David K. Jackson, Ian Johnston, Dominic Kwiatkowski, Cordelia Langford, John Sillitoe on behalf of the Wellcome Sanger Institute COVID-19 Surveillance Team                                                               |
| EPI_ISL_964543, EPI_ISL_964544, EPI_ISL_964546, EPI_ISL_964548, EPI_ISL_964549, EPI_ISL_964550, EPI_ISL_964551, EPI_ISL_964552, EPI_ISL_964553, EPI_ISL_964555, EPI_ISL_964557, EPI_ISL_964558, EPI_ISL_964559, EPI_ISL_964560, EPI_ISL_964562, EPI_ISL_964563, EPI_ISL_964564, EPI_ISL_964567, EPI_ISL_964568, EPI_ISL_964569, EPI_ISL_964570, EPI_ISL_964573, EPI_ISL_964574, EPI_ISL_964576, EPI_ISL_964577, EPI_ISL_964578, EPI_ISL_964579, EPI_ISL_964580, EPI_ISL_964583, EPI_ISL_964584, EPI_ISL_964585, EPI_ISL_964590, EPI_ISL_964591, EPI_ISL_964592, EPI_ISL_964593, EPI_ISL_964594, EPI_ISL_964595, EPI_ISL_964598, EPI_ISL_964599, EPI_ISL_964600, EPI_ISL_964602, EPI_ISL_964603, EPI_ISL_964606, EPI_ISL_964607, EPI_ISL_964609, EPI_ISL_964610, EPI_ISL_964612, EPI_ISL_964614, EPI_ISL_964616, EPI_ISL_964617, EPI_ISL_964620, EPI_ISL_964621, EPI_ISL_964622, EPI_ISL_964623, EPI_ISL_964624, EPI_ISL_964625, EPI_ISL_964627, EPI_ISL_964628, EPI_ISL_964630, EPI_ISL_964631, EPI_ISL_964633, EPI_ISL_964634, EPI_ISL_964635, EPI_ISL_964636, EPI_ISL_964638, EPI_ISL_964639, EPI_ISL_964640, EPI_ISL_964641, EPI_ISL_964642, EPI_ISL_964645, EPI_ISL_964647, EPI_ISL_964649, EPI_ISL_964650, EPI_ISL_964651, EPI_ISL_964652, EPI_ISL_964653, EPI_ISL_964655, EPI_ISL_964656, EPI_ISL_964657, EPI_ISL_964658, EPI_ISL_964659, EPI_ISL_964660, EPI_ISL_964661, EPI_ISL_964662, EPI_ISL_964663, EPI_ISL_964664, EPI_ISL_964665, EPI_ISL_964666, EPI_ISL_964667, EPI_ISL_964669, EPI_ISL_964671, EPI_ISL_964672, EPI_ISL_964673, EPI_ISL_964674, EPI_ISL_964675, EPI_ISL_964676, EPI_ISL_964677, EPI_ISL_964679, EPI_ISL_964681, EPI_ISL_964684, EPI_ISL_964686, EPI_ISL_964687, EPI_ISL_964688, EPI_ISL_964689, EPI_ISL_964695, EPI_ISL_964697, EPI_ISL_964699, EPI_ISL_964701, EPI_ISL_964702, EPI_ISL_964703, EPI_ISL_964704, EPI_ISL_964707, EPI_ISL_964708, EPI_ISL_964709, EPI_ISL_964710, EPI_ISL_964712, EPI_ISL_964716, EPI_ISL_964718, EPI_ISL_964719, EPI_ISL_964720, EPI_ISL_964723, EPI_ISL_964724, EPI_ISL_964725, EPI_ISL_964727, EPI_ISL_964730, EPI_ISL_964731, EPI_ISL_964732, EPI_ISL_964735, EPI_ISL_964738, EPI_ISL_964740, EPI_ISL_964742, EPI_ISL_964743, EPI_ISL_964744, EPI_ISL_964745, EPI_ISL_964746, EPI_ISL_964748, EPI_ISL_964750, EPI_ISL_964751, EPI_ISL_964752, EPI_ISL_964753, EPI_ISL_964755, EPI_ISL_964756, EPI_ISL_964757, EPI_ISL_964758, EPI_ISL_964759, EPI_ISL_964761, EPI_ISL_964763, EPI_ISL_964765, EPI_ISL_964766, EPI_ISL_964769, EPI_ISL_964770, EPI_ISL_964771, EPI_ISL_964773, EPI_ISL_964775, EPI_ISL_964778, EPI_ISL_964782, EPI_ISL_964783, EPI_ISL_964784, EPI_ISL_964785, EPI_ISL_964786, EPI_ISL_964787, EPI_ISL_964789, EPI_ISL_964791, EPI_ISL_964792, EPI_ISL_964793, EPI_ISL_964794, EPI_ISL_964795, EPI_ISL_964796, EPI_ISL_964797, EPI_ISL_964798, EPI_ISL_964799, EPI_ISL_964800, EPI_ISL_964801, EPI_ISL_964802, EPI_ISL_964804, EPI_ISL_964806, EPI_ISL_964807, EPI_ISL_964808, EPI_ISL_964809, EPI_ISL_964810, EPI_ISL_964811, EPI_ISL_964812, EPI_ISL_964813, EPI_ISL_964814, EPI_ISL_964817, EPI_ISL_964819, EPI_ISL_964820, EPI_ISL_964821, EPI_ISL_964824, EPI_ISL_964825, EPI_ISL_964826, EPI_ISL_964828, EPI_ISL_964829, EPI_ISL_964830, EPI_ISL_964831, EPI_ISL_964832, EPI_ISL_964833, EPI_ISL_964834, EPI_ISL_964836, EPI_ISL_964838, EPI_ISL_964843, EPI_ISL_964844, EPI_ISL_964845, EPI_ISL_964846, EPI_ISL_964847, EPI_ISL_964848, EPI_ISL_964849, EPI_ISL_964851, EPI_ISL_964852, EPI_ISL_964854, EPI_ISL_964855, EPI_ISL_964857, EPI_ISL_964859, EPI_ISL_964861, EPI_ISL_964863, EPI_ISL_964864, EPI_ISL_964865, EPI_ISL_964866, EPI_ISL_964868, EPI_ISL_964869, EPI_ISL_964871, EPI_ISL_964872, EPI_ISL_964873, EPI_ISL_964874, EPI_ISL_964875 | Lighthouse Lab in Alderley Park                                                          | Wellcome Sanger Institute for the COVID-19 Genomics UK (COG-UK) Consortium                                 | Jacquelyn Wynn, Mairead Hyland, The Lighthouse Lab in Alderley Park and Alex Alderton, Roberto Amato, Sonia Goncalves, Ewan Harrison, David K. Jackson, Ian Johnston, Dominic Kwiatkowski, Cordelia Langford, John Sillitoe on behalf of the Wellcome Sanger Institute COVID-19 Surveillance Team                               |
| EPI_ISL_964880                                                                                                                                                                                                                                                                                                                                                                                                                                                                                                                                                                                                                                                                                                                                                                                                                                                                                                                                                                                                                                                                                                                                                                                                                                                                                                                                                                                                                                                                                                                                                                                                                                                                                                                                                                                                                                                                                                                                                                                                                                                                                                                                                                                                                                                                                                                                                                                                                                                                                                                                                                                                                                                                                                                                                                                                                                                                                                                                                                                                                                                                                                                                                                                                                                                                                                                                                                                                                                                                                                                                                                                                                                                                                                                                 | National Institute of Laboratory Medicine and Referral Center                            | Sher-e-Bangla Nagar, Agargaon, Dhaka-1207, Bangladesh.                                                     | Shahina Akter, Mohammad Samir Uzzaman, Eshrar Osman, Md. Ahashan Habib, Tanjina Akhtar Banu, Abu Sayeed Mohammad Mahmud, Md. Murshed Hasan Sarkar, Barna Goswami, Iffat Jahan, Md. Saddam Hossain, Tasnim Nafisa, Md. Maruf Ahmed Molla, Mahmuda Yeasmin, Asish Kumar Ghosh, Arifa Akram, A. K. M.Shamsuzzaman, Md. Salim Khan  |
| EPI_ISL_964881                                                                                                                                                                                                                                                                                                                                                                                                                                                                                                                                                                                                                                                                                                                                                                                                                                                                                                                                                                                                                                                                                                                                                                                                                                                                                                                                                                                                                                                                                                                                                                                                                                                                                                                                                                                                                                                                                                                                                                                                                                                                                                                                                                                                                                                                                                                                                                                                                                                                                                                                                                                                                                                                                                                                                                                                                                                                                                                                                                                                                                                                                                                                                                                                                                                                                                                                                                                                                                                                                                                                                                                                                                                                                                                                 | Laboratory of Virology and Molecular Diagnostics                                         | Institute of Public Health of Republic of North Macedonia Laboratory of Virology and Molecular Diagnostics | Kuzmanovska M., Boshevskva G.                                                                                                                                                                                                                                                                                                   |
| EPI_ISL_964882                                                                                                                                                                                                                                                                                                                                                                                                                                                                                                                                                                                                                                                                                                                                                                                                                                                                                                                                                                                                                                                                                                                                                                                                                                                                                                                                                                                                                                                                                                                                                                                                                                                                                                                                                                                                                                                                                                                                                                                                                                                                                                                                                                                                                                                                                                                                                                                                                                                                                                                                                                                                                                                                                                                                                                                                                                                                                                                                                                                                                                                                                                                                                                                                                                                                                                                                                                                                                                                                                                                                                                                                                                                                                                                                 | General Hospital "Abdulah Nakas" Sarajevo                                                | Allea Genetic Centre                                                                                       | Lana Salihefendic, Dino Pecar, Adis Kandic, Sead Jazic, Rijad Konjhodzic                                                                                                                                                                                                                                                        |
| EPI_ISL_964883                                                                                                                                                                                                                                                                                                                                                                                                                                                                                                                                                                                                                                                                                                                                                                                                                                                                                                                                                                                                                                                                                                                                                                                                                                                                                                                                                                                                                                                                                                                                                                                                                                                                                                                                                                                                                                                                                                                                                                                                                                                                                                                                                                                                                                                                                                                                                                                                                                                                                                                                                                                                                                                                                                                                                                                                                                                                                                                                                                                                                                                                                                                                                                                                                                                                                                                                                                                                                                                                                                                                                                                                                                                                                                                                 | Laboratory of Virology and Molecular Diagnostics                                         | Institute of Public Health of Republic of North Macedonia Laboratory of Virology and Molecular Diagnostics | Kuzmanovska M., Boshevskva G.                                                                                                                                                                                                                                                                                                   |
| EPI_ISL_964884                                                                                                                                                                                                                                                                                                                                                                                                                                                                                                                                                                                                                                                                                                                                                                                                                                                                                                                                                                                                                                                                                                                                                                                                                                                                                                                                                                                                                                                                                                                                                                                                                                                                                                                                                                                                                                                                                                                                                                                                                                                                                                                                                                                                                                                                                                                                                                                                                                                                                                                                                                                                                                                                                                                                                                                                                                                                                                                                                                                                                                                                                                                                                                                                                                                                                                                                                                                                                                                                                                                                                                                                                                                                                                                                 | National Institute of Laboratory Medicine and Referral Center                            | Genomic Research Lab, BCSIR                                                                                | Tanjina Akhtar Banu, Mohammad Samir Uzzaman, Eshrar Osman, Md. Ahashan Habib, Shahina Akter, Abu Sayeed Mohammad Mahmud, Md. Murshed Hasan Sarkar, Barna Goswami, Iffat Jahan, Md. Saddam Hossain, Tasnim Nafisa, Md. Maruf Ahmed Molla, Mahmuda Yeasmin, Asish Kumar Ghosh, Arifa Akram, A. K. M.Shamsuzzaman, Md. Salim Khan  |
| EPI_ISL_964917                                                                                                                                                                                                                                                                                                                                                                                                                                                                                                                                                                                                                                                                                                                                                                                                                                                                                                                                                                                                                                                                                                                                                                                                                                                                                                                                                                                                                                                                                                                                                                                                                                                                                                                                                                                                                                                                                                                                                                                                                                                                                                                                                                                                                                                                                                                                                                                                                                                                                                                                                                                                                                                                                                                                                                                                                                                                                                                                                                                                                                                                                                                                                                                                                                                                                                                                                                                                                                                                                                                                                                                                                                                                                                                                 | National Institute of Laboratory Medicine and Referral Center                            | Genomic Research Lab, BCSIR                                                                                | Md. Maruf Ahmed Molla, Mohammad Samir Uzzaman, Eshrar Osman, Md. Ahashan Habib, Shahina Akter, Tanjina Akhtar Banu, Abu Sayeed Mohammad Mahmud, Md. Murshed Hasan Sarkar, Barna Goswami, Iffat Jahan, Md. Saddam Hossain, Tasnim Nafisa, Mahmuda Yeasmin, Asish Kumar Ghosh, Arifa Akram, A. K. M. Shamsuzzaman, Md. Salim Khan |
| EPI_ISL_964922, EPI_ISL_964939                                                                                                                                                                                                                                                                                                                                                                                                                                                                                                                                                                                                                                                                                                                                                                                                                                                                                                                                                                                                                                                                                                                                                                                                                                                                                                                                                                                                                                                                                                                                                                                                                                                                                                                                                                                                                                                                                                                                                                                                                                                                                                                                                                                                                                                                                                                                                                                                                                                                                                                                                                                                                                                                                                                                                                                                                                                                                                                                                                                                                                                                                                                                                                                                                                                                                                                                                                                                                                                                                                                                                                                                                                                                                                                 | Instituto Nacional de Saude (INS), Mozambique                                            | KRISP, KZN Research Innovation and Sequencing Platform                                                     | Nalia Ismael, Nadia Siteo, Paulo Arnaldo, Nedio Mabunda, Glandhari J, Pillay S, Emmanuel S, Tegally H, Wilkinson E, de Oliveira T                                                                                                                                                                                               |
| EPI_ISL_964949                                                                                                                                                                                                                                                                                                                                                                                                                                                                                                                                                                                                                                                                                                                                                                                                                                                                                                                                                                                                                                                                                                                                                                                                                                                                                                                                                                                                                                                                                                                                                                                                                                                                                                                                                                                                                                                                                                                                                                                                                                                                                                                                                                                                                                                                                                                                                                                                                                                                                                                                                                                                                                                                                                                                                                                                                                                                                                                                                                                                                                                                                                                                                                                                                                                                                                                                                                                                                                                                                                                                                                                                                                                                                                                                 | Laboratorio de Virologia del HUCA                                                        | Laboratorio de Virologia del HUCA                                                                          | Castelló C, Gómez de Oña J, Boga JA, Rojo S, Alvarez-Arguelles ME, Abreu F, Costales I, Sandoval M, Perez-Martínez Z, Martín-Rodríguez G, Coto E, Melón S                                                                                                                                                                       |
| EPI_ISL_964950                                                                                                                                                                                                                                                                                                                                                                                                                                                                                                                                                                                                                                                                                                                                                                                                                                                                                                                                                                                                                                                                                                                                                                                                                                                                                                                                                                                                                                                                                                                                                                                                                                                                                                                                                                                                                                                                                                                                                                                                                                                                                                                                                                                                                                                                                                                                                                                                                                                                                                                                                                                                                                                                                                                                                                                                                                                                                                                                                                                                                                                                                                                                                                                                                                                                                                                                                                                                                                                                                                                                                                                                                                                                                                                                 | Laboratory of Virology and Molecular Diagnostics                                         | Institute of Public Health of Republic of North Macedonia Laboratory of Virology and Molecular Diagnostics | Kuzmanovska M., Boshevskva G.                                                                                                                                                                                                                                                                                                   |
| EPI_ISL_964956                                                                                                                                                                                                                                                                                                                                                                                                                                                                                                                                                                                                                                                                                                                                                                                                                                                                                                                                                                                                                                                                                                                                                                                                                                                                                                                                                                                                                                                                                                                                                                                                                                                                                                                                                                                                                                                                                                                                                                                                                                                                                                                                                                                                                                                                                                                                                                                                                                                                                                                                                                                                                                                                                                                                                                                                                                                                                                                                                                                                                                                                                                                                                                                                                                                                                                                                                                                                                                                                                                                                                                                                                                                                                                                                 | Nordland Hospital - Bodo, Laboratory Department, Molecular Biology Unit                  | Norwegian Institute of Public Health, Department of Virology                                               | Kathrine Stene-Johansen, Kamilla Heddeland Instefjord, Hilde Elshaug, Ignacio Garcia Llorente, Serina B Engebretsen, Atiya R Ali, Marie Paulsen Madsen, Rasmus Riis Kopperud, Hilde Vollan, Karoline Bragstad, Olav Hungnes                                                                                                     |
| EPI_ISL_964964                                                                                                                                                                                                                                                                                                                                                                                                                                                                                                                                                                                                                                                                                                                                                                                                                                                                                                                                                                                                                                                                                                                                                                                                                                                                                                                                                                                                                                                                                                                                                                                                                                                                                                                                                                                                                                                                                                                                                                                                                                                                                                                                                                                                                                                                                                                                                                                                                                                                                                                                                                                                                                                                                                                                                                                                                                                                                                                                                                                                                                                                                                                                                                                                                                                                                                                                                                                                                                                                                                                                                                                                                                                                                                                                 | Akershus University Hospital, Department for Microbiology and Infectious Disease Control | Norwegian Institute of Public Health, Department of Virology                                               | Kathrine Stene-Johansen, Kamilla Heddeland Instefjord, Hilde Elshaug, Ignacio Garcia Llorente, Serina B Engebretsen, Atiya R Ali, Marie Paulsen Madsen, Rasmus Riis Kopperud, Hilde Vollan, Karoline Bragstad, Olav Hungnes                                                                                                     |
| EPI_ISL_965016, EPI_ISL_965017, EPI_ISL_965018, EPI_ISL_965019, EPI_ISL_965020                                                                                                                                                                                                                                                                                                                                                                                                                                                                                                                                                                                                                                                                                                                                                                                                                                                                                                                                                                                                                                                                                                                                                                                                                                                                                                                                                                                                                                                                                                                                                                                                                                                                                                                                                                                                                                                                                                                                                                                                                                                                                                                                                                                                                                                                                                                                                                                                                                                                                                                                                                                                                                                                                                                                                                                                                                                                                                                                                                                                                                                                                                                                                                                                                                                                                                                                                                                                                                                                                                                                                                                                                                                                 | Florida Bureau of Public Health Laboratories                                             | Florida Bureau of Public Health Laboratories                                                               | Sarah Schmedes, Jason Blanton                                                                                                                                                                                                                                                                                                   |
| EPI_ISL_965029                                                                                                                                                                                                                                                                                                                                                                                                                                                                                                                                                                                                                                                                                                                                                                                                                                                                                                                                                                                                                                                                                                                                                                                                                                                                                                                                                                                                                                                                                                                                                                                                                                                                                                                                                                                                                                                                                                                                                                                                                                                                                                                                                                                                                                                                                                                                                                                                                                                                                                                                                                                                                                                                                                                                                                                                                                                                                                                                                                                                                                                                                                                                                                                                                                                                                                                                                                                                                                                                                                                                                                                                                                                                                                                                 | Laboratorio de Virologia HUCA                                                            | Laboratorio de Virologia HUCA                                                                              | Castelló C, Gómez de Oña J, Boga JA, Rojo S, Alvarez-Arguelles ME, Abreu F, Costales I, Sandoval M, Perez-Martínez Z, Martín-Rodríguez G, Coto E, Melón S                                                                                                                                                                       |
| EPI_ISL_965033                                                                                                                                                                                                                                                                                                                                                                                                                                                                                                                                                                                                                                                                                                                                                                                                                                                                                                                                                                                                                                                                                                                                                                                                                                                                                                                                                                                                                                                                                                                                                                                                                                                                                                                                                                                                                                                                                                                                                                                                                                                                                                                                                                                                                                                                                                                                                                                                                                                                                                                                                                                                                                                                                                                                                                                                                                                                                                                                                                                                                                                                                                                                                                                                                                                                                                                                                                                                                                                                                                                                                                                                                                                                                                                                 | Laboratorio de Virologia HUCA                                                            | Laboratorio de Virologia HUCA                                                                              | Castelló C, Gómez de Oña J, Boga JA, Rojo S, Alvarez-Arguelles ME, Abreu F, Costales I, Sandoval M, Perez-Martínez Z, Martín-Rodríguez G, Coto E, Melón S                                                                                                                                                                       |
| EPI_ISL_965047, EPI_ISL_965052, EPI_ISL_965078, EPI_ISL_965079, EPI_ISL_965082, EPI_ISL_965083, EPI_ISL_965085, EPI_ISL_965090, EPI_ISL_965091, EPI_ISL_965093, EPI_ISL_965094, EPI_ISL_965095, EPI_ISL_965097, EPI_ISL_965098, EPI_ISL_965099, EPI_ISL_965100, EPI_ISL_965102, EPI_ISL_965103, EPI_ISL_965104, EPI_ISL_965106, EPI_ISL_965107, EPI_ISL_965108, EPI_ISL_965109, EPI_ISL_965111, EPI_ISL_965112                                                                                                                                                                                                                                                                                                                                                                                                                                                                                                                                                                                                                                                                                                                                                                                                                                                                                                                                                                                                                                                                                                                                                                                                                                                                                                                                                                                                                                                                                                                                                                                                                                                                                                                                                                                                                                                                                                                                                                                                                                                                                                                                                                                                                                                                                                                                                                                                                                                                                                                                                                                                                                                                                                                                                                                                                                                                                                                                                                                                                                                                                                                                                                                                                                                                                                                                 | Wyoming Public Health Laboratory                                                         | Wyoming Public Health Laboratory                                                                           | Noah Hull, Taylor Fearing, Lynette Gumbleton, Channing Weber, Ashley Norberg, Bailey Bowcutt, and Wanda Manley                                                                                                                                                                                                                  |
| EPI_ISL_965113, EPI_ISL_965121                                                                                                                                                                                                                                                                                                                                                                                                                                                                                                                                                                                                                                                                                                                                                                                                                                                                                                                                                                                                                                                                                                                                                                                                                                                                                                                                                                                                                                                                                                                                                                                                                                                                                                                                                                                                                                                                                                                                                                                                                                                                                                                                                                                                                                                                                                                                                                                                                                                                                                                                                                                                                                                                                                                                                                                                                                                                                                                                                                                                                                                                                                                                                                                                                                                                                                                                                                                                                                                                                                                                                                                                                                                                                                                 | Ohio Department of Health Laboratory                                                     | Ohio Department of Health Laboratory                                                                       | Holmes, Jennifer; Eric Brandt, Keoni Omura, Glen McGillivray, Caitlin McDonnell, Jade Mowery, Stephanie Mccracken, Tyler Payne, Kirtana Ramadugu, Erica Leasure, Brent Lee, Kelsey Florek, Heather Blankenship, Quanta Brown, and Tammy Bannerman                                                                               |
| EPI_ISL_965133                                                                                                                                                                                                                                                                                                                                                                                                                                                                                                                                                                                                                                                                                                                                                                                                                                                                                                                                                                                                                                                                                                                                                                                                                                                                                                                                                                                                                                                                                                                                                                                                                                                                                                                                                                                                                                                                                                                                                                                                                                                                                                                                                                                                                                                                                                                                                                                                                                                                                                                                                                                                                                                                                                                                                                                                                                                                                                                                                                                                                                                                                                                                                                                                                                                                                                                                                                                                                                                                                                                                                                                                                                                                                                                                 | Azienda Ospedaliera San Camillo Forlanini                                                | INMI Lazzaro Spallanzani IRCCS                                                                             | B Bartolini, O Butera, C.E.M Gruber, M Rueca, F Messina, E Giombini, F Basile, A D'Agostino, G Parisi, MR Capobianchi, A Di Caro                                                                                                                                                                                                |
| EPI_ISL_965139                                                                                                                                                                                                                                                                                                                                                                                                                                                                                                                                                                                                                                                                                                                                                                                                                                                                                                                                                                                                                                                                                                                                                                                                                                                                                                                                                                                                                                                                                                                                                                                                                                                                                                                                                                                                                                                                                                                                                                                                                                                                                                                                                                                                                                                                                                                                                                                                                                                                                                                                                                                                                                                                                                                                                                                                                                                                                                                                                                                                                                                                                                                                                                                                                                                                                                                                                                                                                                                                                                                                                                                                                                                                                                                                 | Fondazione Policlinico Universitario "A. Gemelli" IRCCS                                  | INMI Lazzaro Spallanzani IRCCS                                                                             | B Bartolini, O Butera, C.E.M Gruber, M Rueca, F Messina, E Giombini, P Cattani, M Sanguinetti, MR Capobianchi, A Di Caro                                                                                                                                                                                                        |
| EPI_ISL_965157, EPI_ISL_965159, EPI_ISL_965160, EPI_ISL_965161, EPI_ISL_965162, EPI_ISL_965163, EPI_ISL_965164, EPI_ISL_965165, EPI_ISL_965166, EPI_ISL_965167, EPI_ISL_965168, EPI_ISL_965169, EPI_ISL_965170, EPI_ISL_965171, EPI_ISL_965172, EPI_ISL_965173, EPI_ISL_965174, EPI_ISL_965175, EPI_ISL_965176, EPI_ISL_965177                                                                                                                                                                                                                                                                                                                                                                                                                                                                                                                                                                                                                                                                                                                                                                                                                                                                                                                                                                                                                                                                                                                                                                                                                                                                                                                                                                                                                                                                                                                                                                                                                                                                                                                                                                                                                                                                                                                                                                                                                                                                                                                                                                                                                                                                                                                                                                                                                                                                                                                                                                                                                                                                                                                                                                                                                                                                                                                                                                                                                                                                                                                                                                                                                                                                                                                                                                                                                 | Clinical Molecular Microbiology Laboratory, UNC Hospitals                                | Jeremy Wang                                                                                                | Jeremy Wang, Alexander Rubinsteyn, Colleen Rice, Jason Smedberg, Shawn Hawken, Melissa Miller, Corbin Jones, Robert Hagan                                                                                                                                                                                                       |
| EPI_ISL_978560, EPI_ISL_978564, EPI_ISL_978567, EPI_ISL_978568, EPI_ISL_978576, EPI_ISL_978582, EPI_ISL_978586, EPI_ISL_978592, EPI_ISL_978595, EPI_ISL_978597, EPI_ISL_978601, EPI_ISL_978602, EPI_ISL_978606, EPI_ISL_978607, EPI_ISL_978615, EPI_ISL_978619, EPI_ISL_978625, EPI_ISL_978669,                                                                                                                                                                                                                                                                                                                                                                                                                                                                                                                                                                                                                                                                                                                                                                                                                                                                                                                                                                                                                                                                                                                                                                                                                                                                                                                                                                                                                                                                                                                                                                                                                                                                                                                                                                                                                                                                                                                                                                                                                                                                                                                                                                                                                                                                                                                                                                                                                                                                                                                                                                                                                                                                                                                                                                                                                                                                                                                                                                                                                                                                                                                                                                                                                                                                                                                                                                                                                                                |                                                                                          |                                                                                                            |                                                                                                                                                                                                                                                                                                                                 |





|                                                                                                                                                                                                                                                                                                                                                                                                                                                                                                                                                                                                                                                                                                                                                                                                                                                                                                                                                                                                                                                                                                                                                                                                                                                                                                                                                                                                                                                                                                                                                                                                                                                                                                                                                                                                                                                                                                                                                                                                                                                                                |                                                                                                                  |                                                                                                                                            |                                                                                                                                                                                                                                                                                                                                               |
|--------------------------------------------------------------------------------------------------------------------------------------------------------------------------------------------------------------------------------------------------------------------------------------------------------------------------------------------------------------------------------------------------------------------------------------------------------------------------------------------------------------------------------------------------------------------------------------------------------------------------------------------------------------------------------------------------------------------------------------------------------------------------------------------------------------------------------------------------------------------------------------------------------------------------------------------------------------------------------------------------------------------------------------------------------------------------------------------------------------------------------------------------------------------------------------------------------------------------------------------------------------------------------------------------------------------------------------------------------------------------------------------------------------------------------------------------------------------------------------------------------------------------------------------------------------------------------------------------------------------------------------------------------------------------------------------------------------------------------------------------------------------------------------------------------------------------------------------------------------------------------------------------------------------------------------------------------------------------------------------------------------------------------------------------------------------------------|------------------------------------------------------------------------------------------------------------------|--------------------------------------------------------------------------------------------------------------------------------------------|-----------------------------------------------------------------------------------------------------------------------------------------------------------------------------------------------------------------------------------------------------------------------------------------------------------------------------------------------|
| EPI_ISL_981309, EPI_ISL_981310, EPI_ISL_981311, EPI_ISL_981312, EPI_ISL_981313, EPI_ISL_981314, EPI_ISL_981315, EPI_ISL_981316, EPI_ISL_981317, EPI_ISL_981319, EPI_ISL_981320, EPI_ISL_981321, EPI_ISL_981322, EPI_ISL_981326, EPI_ISL_981329, EPI_ISL_981330, EPI_ISL_981332, EPI_ISL_981333, EPI_ISL_981334, EPI_ISL_981335, EPI_ISL_981336, EPI_ISL_981337, EPI_ISL_981338, EPI_ISL_981339, EPI_ISL_981340, EPI_ISL_981341, EPI_ISL_981342, EPI_ISL_981345, EPI_ISL_981346, EPI_ISL_981347, EPI_ISL_981348, EPI_ISL_981349, EPI_ISL_981350, EPI_ISL_981351, EPI_ISL_981353, EPI_ISL_981354, EPI_ISL_981356, EPI_ISL_981358, EPI_ISL_981359, EPI_ISL_981361, EPI_ISL_981365, EPI_ISL_981366, EPI_ISL_981367                                                                                                                                                                                                                                                                                                                                                                                                                                                                                                                                                                                                                                                                                                                                                                                                                                                                                                                                                                                                                                                                                                                                                                                                                                                                                                                                                                 |                                                                                                                  |                                                                                                                                            |                                                                                                                                                                                                                                                                                                                                               |
| see above                                                                                                                                                                                                                                                                                                                                                                                                                                                                                                                                                                                                                                                                                                                                                                                                                                                                                                                                                                                                                                                                                                                                                                                                                                                                                                                                                                                                                                                                                                                                                                                                                                                                                                                                                                                                                                                                                                                                                                                                                                                                      | Hospital Universitari Vall d'Hebron - Vall d'Hebron Institut de Recerca                                          | Hospital Universitari Vall d'Hebron - Vall d'Hebron Institut de Recerca                                                                    | Cristina Andrés, Maria Piñana, Josep F Abril, Damir Garcia-Cehic, Ariadna Rando, Juliana Esperalba, Maria Gema Codina, Carla Castillo, Maria Carmen Martin, Tomás Pumarola, Josep Quer, Andrés Antón                                                                                                                                          |
| EPI_ISL_981368, EPI_ISL_981369                                                                                                                                                                                                                                                                                                                                                                                                                                                                                                                                                                                                                                                                                                                                                                                                                                                                                                                                                                                                                                                                                                                                                                                                                                                                                                                                                                                                                                                                                                                                                                                                                                                                                                                                                                                                                                                                                                                                                                                                                                                 | Ohio Department of Health Laboratory                                                                             | Ohio Department of Health Laboratory                                                                                                       | Holmes, Jennifer; Eric Brandt, Keoni Omura, Glen McGilivray, Caitlin McDonnell, Jade Mowery, Stephanie Mccracken, Tyler Payne, Kirtana Ramadugu, Erica Leasure, Brent Lee, Kelsey Florek, Heather Blankenship, Quanta Brown, and Tammy Bannerman                                                                                              |
| EPI_ISL_981377                                                                                                                                                                                                                                                                                                                                                                                                                                                                                                                                                                                                                                                                                                                                                                                                                                                                                                                                                                                                                                                                                                                                                                                                                                                                                                                                                                                                                                                                                                                                                                                                                                                                                                                                                                                                                                                                                                                                                                                                                                                                 | Laboratory for Respiratory Viruses, Cantacuzino National Military-Medical Institute for Research and Development | Cantacuzino Institute Virology                                                                                                             | Luiza Ustea, Nicoleta Paraschiv, Catalina Pascu, Mihaela Lazar                                                                                                                                                                                                                                                                                |
| EPI_ISL_981378                                                                                                                                                                                                                                                                                                                                                                                                                                                                                                                                                                                                                                                                                                                                                                                                                                                                                                                                                                                                                                                                                                                                                                                                                                                                                                                                                                                                                                                                                                                                                                                                                                                                                                                                                                                                                                                                                                                                                                                                                                                                 | AZ Klina                                                                                                         | AZ Klina                                                                                                                                   | Dr. C. Vael                                                                                                                                                                                                                                                                                                                                   |
| EPI_ISL_981391, EPI_ISL_981394, EPI_ISL_981397, EPI_ISL_981407, EPI_ISL_981452                                                                                                                                                                                                                                                                                                                                                                                                                                                                                                                                                                                                                                                                                                                                                                                                                                                                                                                                                                                                                                                                                                                                                                                                                                                                                                                                                                                                                                                                                                                                                                                                                                                                                                                                                                                                                                                                                                                                                                                                 | CH.INTERCOMMUNAL DE CRETEIL                                                                                      | Department of Virology, Henri Mondor University Hospital, Assistance Publique Hôpitaux de Paris, Université Paris-Est Créteil, INSERM U955 | Christophe Rodriguez, Slim Fourati, Vanessa Demontant, Guillaume Gricourt, Melissa N'Debi, Alexandre Soulier, Elisabeth Trawinski, Jean-Michel Pawlotsky                                                                                                                                                                                      |
| EPI_ISL_981459, EPI_ISL_981461, EPI_ISL_981472, EPI_ISL_981474                                                                                                                                                                                                                                                                                                                                                                                                                                                                                                                                                                                                                                                                                                                                                                                                                                                                                                                                                                                                                                                                                                                                                                                                                                                                                                                                                                                                                                                                                                                                                                                                                                                                                                                                                                                                                                                                                                                                                                                                                 | CHI VILLENEUVE ST GEORGES                                                                                        | Department of Virology, Henri Mondor University Hospital, Assistance Publique Hôpitaux de Paris, Université Paris-Est Créteil, INSERM U955 | Christophe Rodriguez, Slim Fourati, Vanessa Demontant, Guillaume Gricourt, Melissa N'Debi, Alexandre Soulier, Elisabeth Trawinski, Jean-Michel Pawlotsky                                                                                                                                                                                      |
| EPI_ISL_981485                                                                                                                                                                                                                                                                                                                                                                                                                                                                                                                                                                                                                                                                                                                                                                                                                                                                                                                                                                                                                                                                                                                                                                                                                                                                                                                                                                                                                                                                                                                                                                                                                                                                                                                                                                                                                                                                                                                                                                                                                                                                 | INSTITUT GUSTAVE ROUSSY                                                                                          | Department of Virology, Henri Mondor University Hospital, Assistance Publique Hôpitaux de Paris, Université Paris-Est Créteil, INSERM U955 | Christophe Rodriguez, Slim Fourati, Vanessa Demontant, Guillaume Gricourt, Melissa N'Debi, Alexandre Soulier, Elisabeth Trawinski, Jean-Michel Pawlotsky                                                                                                                                                                                      |
| EPI_ISL_981486, EPI_ISL_981539, EPI_ISL_981540, EPI_ISL_981542, EPI_ISL_981546                                                                                                                                                                                                                                                                                                                                                                                                                                                                                                                                                                                                                                                                                                                                                                                                                                                                                                                                                                                                                                                                                                                                                                                                                                                                                                                                                                                                                                                                                                                                                                                                                                                                                                                                                                                                                                                                                                                                                                                                 | CH.INTERCOMMUNAL DE CRETEIL                                                                                      | Department of Virology, Henri Mondor University Hospital, Assistance Publique Hôpitaux de Paris, Université Paris-Est Créteil, INSERM U955 | Christophe Rodriguez, Slim Fourati, Vanessa Demontant, Guillaume Gricourt, Melissa N'Debi, Alexandre Soulier, Elisabeth Trawinski, Jean-Michel Pawlotsky                                                                                                                                                                                      |
| EPI_ISL_981560, EPI_ISL_981563, EPI_ISL_981564, EPI_ISL_981566, EPI_ISL_981567, EPI_ISL_981569, EPI_ISL_981570, EPI_ISL_981571, EPI_ISL_981572, EPI_ISL_981575, EPI_ISL_981576, EPI_ISL_981578, EPI_ISL_981581, EPI_ISL_981582, EPI_ISL_981583, EPI_ISL_981584, EPI_ISL_981585, EPI_ISL_981587, EPI_ISL_981588, EPI_ISL_981589, EPI_ISL_981591, EPI_ISL_981592, EPI_ISL_981593, EPI_ISL_981594, EPI_ISL_981595, EPI_ISL_981596, EPI_ISL_981597, EPI_ISL_981642, EPI_ISL_981652, EPI_ISL_981653, EPI_ISL_981655, EPI_ISL_981656, EPI_ISL_981657, EPI_ISL_981658, EPI_ISL_981659, EPI_ISL_981661, EPI_ISL_981663, EPI_ISL_981664, EPI_ISL_981665, EPI_ISL_981666, EPI_ISL_981667, EPI_ISL_981668, EPI_ISL_981669, EPI_ISL_981670, EPI_ISL_981671, EPI_ISL_981672, EPI_ISL_981673, EPI_ISL_981674, EPI_ISL_981675, EPI_ISL_981676, EPI_ISL_981677, EPI_ISL_981678, EPI_ISL_981679, EPI_ISL_981680, EPI_ISL_981681, EPI_ISL_981682, EPI_ISL_981683, EPI_ISL_981702, EPI_ISL_981704, EPI_ISL_981716, EPI_ISL_981717, EPI_ISL_981719, EPI_ISL_981721, EPI_ISL_981722, EPI_ISL_981723, EPI_ISL_981725, EPI_ISL_981726, EPI_ISL_981728, EPI_ISL_981729, EPI_ISL_981730, EPI_ISL_981731, EPI_ISL_981733, EPI_ISL_981734, EPI_ISL_981736, EPI_ISL_981737, EPI_ISL_981738, EPI_ISL_981739, EPI_ISL_981742, EPI_ISL_981743, EPI_ISL_981744, EPI_ISL_981745, EPI_ISL_981746, EPI_ISL_981749, EPI_ISL_981750, EPI_ISL_981751, EPI_ISL_981752, EPI_ISL_981753, EPI_ISL_981754, EPI_ISL_981756, EPI_ISL_981760, EPI_ISL_981761, EPI_ISL_981762, EPI_ISL_981765, EPI_ISL_981767, EPI_ISL_981768, EPI_ISL_981769, EPI_ISL_981770, EPI_ISL_981771, EPI_ISL_981772, EPI_ISL_981773, EPI_ISL_981774, EPI_ISL_981775, EPI_ISL_981777, EPI_ISL_981779, EPI_ISL_981780, EPI_ISL_981781, EPI_ISL_981785, EPI_ISL_981786, EPI_ISL_981787, EPI_ISL_981788, EPI_ISL_981800, EPI_ISL_981813, EPI_ISL_981827, EPI_ISL_981830, EPI_ISL_981831, EPI_ISL_981837, EPI_ISL_981838, EPI_ISL_981839, EPI_ISL_981840, EPI_ISL_981841, EPI_ISL_981842, EPI_ISL_981845, EPI_ISL_981846, EPI_ISL_981847, EPI_ISL_981848 |                                                                                                                  |                                                                                                                                            |                                                                                                                                                                                                                                                                                                                                               |
| see above                                                                                                                                                                                                                                                                                                                                                                                                                                                                                                                                                                                                                                                                                                                                                                                                                                                                                                                                                                                                                                                                                                                                                                                                                                                                                                                                                                                                                                                                                                                                                                                                                                                                                                                                                                                                                                                                                                                                                                                                                                                                      | University Hospitals of Geneva, Laboratory of Virology                                                           | HUG, Laboratory of Virology and the Health2030 Genome Center                                                                               | Samuel Cordey, Ana Rita Goncalves, Laurent Kaiser, Lorenzo Cerutti, Henri Pegeot, Melyssa Elies, Deborah Penet, Keith Harshman, Ioannis Xenarios, Emmanouil Dermitzakis                                                                                                                                                                       |
| EPI_ISL_981946, EPI_ISL_981947, EPI_ISL_981948, EPI_ISL_981949, EPI_ISL_981950, EPI_ISL_981952, EPI_ISL_981953, EPI_ISL_981956, EPI_ISL_981958, EPI_ISL_981959, EPI_ISL_981960, EPI_ISL_981961, EPI_ISL_981962, EPI_ISL_981963, EPI_ISL_981964, EPI_ISL_981966, EPI_ISL_981969, EPI_ISL_981970, EPI_ISL_981971, EPI_ISL_981972, EPI_ISL_981973, EPI_ISL_981975                                                                                                                                                                                                                                                                                                                                                                                                                                                                                                                                                                                                                                                                                                                                                                                                                                                                                                                                                                                                                                                                                                                                                                                                                                                                                                                                                                                                                                                                                                                                                                                                                                                                                                                 |                                                                                                                  |                                                                                                                                            |                                                                                                                                                                                                                                                                                                                                               |
| see above                                                                                                                                                                                                                                                                                                                                                                                                                                                                                                                                                                                                                                                                                                                                                                                                                                                                                                                                                                                                                                                                                                                                                                                                                                                                                                                                                                                                                                                                                                                                                                                                                                                                                                                                                                                                                                                                                                                                                                                                                                                                      | Microbiology Service, Hospital Universitario Clinico San Cecilio, Granada                                        | Microbiology Service, Hospital Universitario Clinico San Cecilio, Granada                                                                  | Adolfo de Salazar, Natalia Chueca, Laura Viñuela, Ana Fuentes, Federico García                                                                                                                                                                                                                                                                |
| EPI_ISL_982171, EPI_ISL_982203, EPI_ISL_982204, EPI_ISL_982205, EPI_ISL_982207, EPI_ISL_982208, EPI_ISL_982209, EPI_ISL_982210, EPI_ISL_982211, EPI_ISL_982212, EPI_ISL_982214, EPI_ISL_982215, EPI_ISL_982216, EPI_ISL_982217, EPI_ISL_982218, EPI_ISL_982220, EPI_ISL_982221, EPI_ISL_982222                                                                                                                                                                                                                                                                                                                                                                                                                                                                                                                                                                                                                                                                                                                                                                                                                                                                                                                                                                                                                                                                                                                                                                                                                                                                                                                                                                                                                                                                                                                                                                                                                                                                                                                                                                                 |                                                                                                                  |                                                                                                                                            |                                                                                                                                                                                                                                                                                                                                               |
| see above                                                                                                                                                                                                                                                                                                                                                                                                                                                                                                                                                                                                                                                                                                                                                                                                                                                                                                                                                                                                                                                                                                                                                                                                                                                                                                                                                                                                                                                                                                                                                                                                                                                                                                                                                                                                                                                                                                                                                                                                                                                                      | Hôpital Henri Mondor                                                                                             | Department of Virology, Henri Mondor University Hospital, Assistance Publique Hôpitaux de Paris, Université Paris-Est Créteil, INSERM U955 | Christophe Rodriguez, Slim Fourati, Vanessa Demontant, Guillaume Gricourt, Melissa N'Debi, Alexandre Soulier, Elisabeth Trawinski, Jean-Michel Pawlotsky                                                                                                                                                                                      |
| EPI_ISL_982232, EPI_ISL_982233, EPI_ISL_982234, EPI_ISL_982235                                                                                                                                                                                                                                                                                                                                                                                                                                                                                                                                                                                                                                                                                                                                                                                                                                                                                                                                                                                                                                                                                                                                                                                                                                                                                                                                                                                                                                                                                                                                                                                                                                                                                                                                                                                                                                                                                                                                                                                                                 | MEPHI, Aix Marseille University                                                                                  | MEPHI, Aix Marseille University                                                                                                            | Anthony LEVASSEUR                                                                                                                                                                                                                                                                                                                             |
| EPI_ISL_982236                                                                                                                                                                                                                                                                                                                                                                                                                                                                                                                                                                                                                                                                                                                                                                                                                                                                                                                                                                                                                                                                                                                                                                                                                                                                                                                                                                                                                                                                                                                                                                                                                                                                                                                                                                                                                                                                                                                                                                                                                                                                 | National Institute of Laboratory Medicine and Referral Center                                                    | Genomic Research Lab, BCSIR                                                                                                                | Barna Goswami, Mohammad Samir Uzzaman, Eshrar Osman, Md. Ahashan Habib, Shahina Akter, Tanjina Akhtar Banu, Abu Sayeed Mohammad Mahmud, Md. Murshed Hasan Sarkar, Barna Goswami, Iflat Jahan, Md. Saddam Hossain, Tasnim Nafisa, Md. Maruf Ahmed Molla, Mahmuda Yeasmin, Asish Kumar Ghosh, Arifa Akram, A. K. M.Shamsuzzaman, Md. Salim Khan |
| EPI_ISL_982242, EPI_ISL_982243, EPI_ISL_982246, EPI_ISL_982248, EPI_ISL_982250, EPI_ISL_982253, EPI_ISL_982258, EPI_ISL_982263, EPI_ISL_982266, EPI_ISL_982271, EPI_ISL_982273, EPI_ISL_982275                                                                                                                                                                                                                                                                                                                                                                                                                                                                                                                                                                                                                                                                                                                                                                                                                                                                                                                                                                                                                                                                                                                                                                                                                                                                                                                                                                                                                                                                                                                                                                                                                                                                                                                                                                                                                                                                                 |                                                                                                                  |                                                                                                                                            |                                                                                                                                                                                                                                                                                                                                               |
| see above                                                                                                                                                                                                                                                                                                                                                                                                                                                                                                                                                                                                                                                                                                                                                                                                                                                                                                                                                                                                                                                                                                                                                                                                                                                                                                                                                                                                                                                                                                                                                                                                                                                                                                                                                                                                                                                                                                                                                                                                                                                                      | Lab voor klinische biologie                                                                                      | Lab voor klinische biologie                                                                                                                | Hannelore Hamerlinck, Marija Janevska, Bruno Verhasselt                                                                                                                                                                                                                                                                                       |
| EPI_ISL_982314, EPI_ISL_982315, EPI_ISL_982316, EPI_ISL_982318, EPI_ISL_982319, EPI_ISL_982320                                                                                                                                                                                                                                                                                                                                                                                                                                                                                                                                                                                                                                                                                                                                                                                                                                                                                                                                                                                                                                                                                                                                                                                                                                                                                                                                                                                                                                                                                                                                                                                                                                                                                                                                                                                                                                                                                                                                                                                 | CH.INTERCOMMUNAL DE CRETEIL                                                                                      | Department of Virology, Henri Mondor University Hospital, Assistance Publique Hôpitaux de Paris, Université Paris-Est Créteil, INSERM U955 | Christophe Rodriguez, Slim Fourati, Vanessa Demontant, Guillaume Gricourt, Melissa N'Debi, Alexandre Soulier, Elisabeth Trawinski, Jean-Michel Pawlotsky                                                                                                                                                                                      |
| EPI_ISL_982347, EPI_ISL_982348, EPI_ISL_982349, EPI_ISL_982350, EPI_ISL_982353, EPI_ISL_982356, EPI_ISL_982368, EPI_ISL_982378, EPI_ISL_982385, EPI_ISL_982388, EPI_ISL_982391, EPI_ISL_982392, EPI_ISL_982393, EPI_ISL_982394, EPI_ISL_982395, EPI_ISL_982396, EPI_ISL_982402, EPI_ISL_982404, EPI_ISL_982405, EPI_ISL_982410, EPI_ISL_982412, EPI_ISL_982420, EPI_ISL_982422, EPI_ISL_982424                                                                                                                                                                                                                                                                                                                                                                                                                                                                                                                                                                                                                                                                                                                                                                                                                                                                                                                                                                                                                                                                                                                                                                                                                                                                                                                                                                                                                                                                                                                                                                                                                                                                                 |                                                                                                                  |                                                                                                                                            |                                                                                                                                                                                                                                                                                                                                               |
| see above                                                                                                                                                                                                                                                                                                                                                                                                                                                                                                                                                                                                                                                                                                                                                                                                                                                                                                                                                                                                                                                                                                                                                                                                                                                                                                                                                                                                                                                                                                                                                                                                                                                                                                                                                                                                                                                                                                                                                                                                                                                                      | M Health Fairview                                                                                                | Minnesota Department of Health, Public Health Laboratory                                                                                   | Alexandra Lorentz, Jacob Garfin, Matt Plumb, and Xiong Wang                                                                                                                                                                                                                                                                                   |
| EPI_ISL_982434, EPI_ISL_982435, EPI_ISL_982436, EPI_ISL_982437, EPI_ISL_982438, EPI_ISL_982446, EPI_ISL_982450, EPI_ISL_982454, EPI_ISL_982457, EPI_ISL_982460, EPI_ISL_982462, EPI_ISL_982463, EPI_ISL_982464, EPI_ISL_982468, EPI_ISL_982471, EPI_ISL_982479, EPI_ISL_982481, EPI_ISL_982486, EPI_ISL_982491, EPI_ISL_982492, EPI_ISL_982495, EPI_ISL_982496                                                                                                                                                                                                                                                                                                                                                                                                                                                                                                                                                                                                                                                                                                                                                                                                                                                                                                                                                                                                                                                                                                                                                                                                                                                                                                                                                                                                                                                                                                                                                                                                                                                                                                                 |                                                                                                                  |                                                                                                                                            |                                                                                                                                                                                                                                                                                                                                               |
| see above                                                                                                                                                                                                                                                                                                                                                                                                                                                                                                                                                                                                                                                                                                                                                                                                                                                                                                                                                                                                                                                                                                                                                                                                                                                                                                                                                                                                                                                                                                                                                                                                                                                                                                                                                                                                                                                                                                                                                                                                                                                                      | MONTEFIORE MEDICAL CENTER LABORATORIES                                                                           | Wadsworth Center, New York State Department of Health                                                                                      | Kirsten St. George, Daryl M. Lamson, Alexis Russel, Matthew Shudt, Melissa A Leisner, Jonathan Plitnick, Navjot Singh, John Kelly, Erasmus Schneider, Erica Lasek-Nesselquist                                                                                                                                                                 |
| EPI_ISL_982499, EPI_ISL_982500, EPI_ISL_982501, EPI_ISL_982502, EPI_ISL_982503, EPI_ISL_982504                                                                                                                                                                                                                                                                                                                                                                                                                                                                                                                                                                                                                                                                                                                                                                                                                                                                                                                                                                                                                                                                                                                                                                                                                                                                                                                                                                                                                                                                                                                                                                                                                                                                                                                                                                                                                                                                                                                                                                                 | ADIRONDACK MEDICAL CENTER                                                                                        | Wadsworth Center, New York State Department of Health                                                                                      | Kirsten St. George, Daryl M. Lamson, Alexis Russel, Matthew Shudt, Melissa A Leisner, Jonathan Plitnick, Navjot Singh, John Kelly, Erasmus Schneider, Erica Lasek-Nesselquist                                                                                                                                                                 |
| EPI_ISL_982627, EPI_ISL_982628, EPI_ISL_982629, EPI_ISL_982630                                                                                                                                                                                                                                                                                                                                                                                                                                                                                                                                                                                                                                                                                                                                                                                                                                                                                                                                                                                                                                                                                                                                                                                                                                                                                                                                                                                                                                                                                                                                                                                                                                                                                                                                                                                                                                                                                                                                                                                                                 | Landstuhl Regional Medical Center                                                                                | US Air Force School of Aerospace Medicine                                                                                                  | Anthony Fries, Jennifer Meyer, William Gruner, William Buggele, Amanda Javorina, Sarah Purves, Fritz Castillo, Cole Anderson, Clarise Starr, Elizabeth Macias                                                                                                                                                                                 |
| EPI_ISL_982631, EPI_ISL_982633, EPI_ISL_982634, EPI_ISL_982635, EPI_ISL_982636, EPI_ISL_982638, EPI_ISL_982639, EPI_ISL_982641, EPI_ISL_982642, EPI_ISL_982644, EPI_ISL_982645, EPI_ISL_982646, EPI_ISL_982647, EPI_ISL_982648, EPI_ISL_982649, EPI_ISL_982650, EPI_ISL_982651, EPI_ISL_982652, EPI_ISL_982653, EPI_ISL_982656, EPI_ISL_982657, EPI_ISL_982658, EPI_ISL_982659, EPI_ISL_982661, EPI_ISL_982662, EPI_ISL_982665, EPI_ISL_982666, EPI_ISL_982667, EPI_ISL_982668, EPI_ISL_982670, EPI_ISL_982671, EPI_ISL_982674, EPI_ISL_982675, EPI_ISL_982676, EPI_ISL_982677, EPI_ISL_982678, EPI_ISL_982679, EPI_ISL_982680, EPI_ISL_982681, EPI_ISL_982682, EPI_ISL_982683, EPI_ISL_982684, EPI_ISL_982686, EPI_ISL_982688, EPI_ISL_982689, EPI_ISL_982692, EPI_ISL_982694, EPI_ISL_982696, EPI_ISL_982697, EPI_ISL_982699, EPI_ISL_982700, EPI_ISL_982701, EPI_ISL_982702, EPI_ISL_982703, EPI_ISL_982704, EPI_ISL_982705, EPI_ISL_982706, EPI_ISL_982708, EPI_ISL_982710, EPI_ISL_982712, EPI_ISL_982713, EPI_ISL_982715, EPI_ISL_982716, EPI_ISL_982717, EPI_ISL_982718, EPI_ISL_982720, EPI_ISL_982721, EPI_ISL_982722, EPI_ISL_982723, EPI_ISL_982724, EPI_ISL_982725, EPI_ISL_982726, EPI_ISL_982727, EPI_ISL_982729, EPI_ISL_982730, EPI_ISL_982731, EPI_ISL_982732, EPI_ISL_982733, EPI_ISL_982734, EPI_ISL_982735, EPI_ISL_982736, EPI_ISL_982737, EPI_ISL_982738, EPI_ISL_982739, EPI_ISL_982740, EPI_ISL_982741, EPI_ISL_982742, EPI_ISL_982743, EPI_ISL_982745, EPI_ISL_982747, EPI_ISL_982748, EPI_ISL_982750, EPI_ISL_982751, EPI_ISL_982752, EPI_ISL_982753, EPI_ISL_982754, EPI_ISL_982755, EPI_ISL_982757, EPI_ISL_982758, EPI_ISL_982759, EPI_ISL_982760, EPI_ISL_982761                                                                                                                                                                                                                                                                                                                                                                                 |                                                                                                                  |                                                                                                                                            |                                                                                                                                                                                                                                                                                                                                               |
| see above                                                                                                                                                                                                                                                                                                                                                                                                                                                                                                                                                                                                                                                                                                                                                                                                                                                                                                                                                                                                                                                                                                                                                                                                                                                                                                                                                                                                                                                                                                                                                                                                                                                                                                                                                                                                                                                                                                                                                                                                                                                                      | US Air Force School of Aerospace Medicine                                                                        | US Air Force School of Aerospace Medicine                                                                                                  | Anthony Fries, Jennifer Meyer, William Gruner, William Buggele, Amanda Javorina, Sarah Purves, Clarise Starr, Elizabeth Macias                                                                                                                                                                                                                |
| EPI_ISL_982781, EPI_ISL_982783, EPI_ISL_982784, EPI_ISL_982785, EPI_ISL_982786, EPI_ISL_982787, EPI_ISL_982788, EPI_ISL_982789, EPI_ISL_982791, EPI_ISL_982792, EPI_ISL_982793, EPI_ISL_982794, EPI_ISL_982795, EPI_ISL_982797, EPI_ISL_982798, EPI_ISL_982799, EPI_ISL_982800, EPI_ISL_982802, EPI_ISL_982803, EPI_ISL_982805, EPI_ISL_982806, EPI_ISL_982807, EPI_ISL_982808, EPI_ISL_982809, EPI_ISL_982810, EPI_ISL_982811, EPI_ISL_982812, EPI_ISL_982813, EPI_ISL_982814, EPI_ISL_982815, EPI_ISL_982816, EPI_ISL_982817, EPI_ISL_982818, EPI_ISL_982819, EPI_ISL_982820, EPI_ISL_982821, EPI_ISL_982822, EPI_ISL_982823, EPI_ISL_982826, EPI_ISL_982827, EPI_ISL_982828, EPI_ISL_982829, EPI_ISL_982830, EPI_ISL_982832, EPI_ISL_982833, EPI_ISL_982834, EPI_ISL_982837, EPI_ISL_982838, EPI_ISL_982839, EPI_ISL_982840                                                                                                                                                                                                                                                                                                                                                                                                                                                                                                                                                                                                                                                                                                                                                                                                                                                                                                                                                                                                                                                                                                                                                                                                                                                 |                                                                                                                  |                                                                                                                                            |                                                                                                                                                                                                                                                                                                                                               |
| see above                                                                                                                                                                                                                                                                                                                                                                                                                                                                                                                                                                                                                                                                                                                                                                                                                                                                                                                                                                                                                                                                                                                                                                                                                                                                                                                                                                                                                                                                                                                                                                                                                                                                                                                                                                                                                                                                                                                                                                                                                                                                      | University Health Network/Mount Sinai Hospital Department of                                                     | Ontario Institute for Cancer Research                                                                                                      | Marie-Ming Aynaud, Javier Hernandez, Seda Barutcu, Kin Chan, Jessica Bourke, Marc Mazzulli, Tony Mazzulli, Laurence Pelletier, Jeff Wrana, Aimee                                                                                                                                                                                              |



|                                                                                                                                                                                                                                                                                                                                                                                                                                                                                                                                                                                                                                                                                                                                                                                                                                                                                                                                                                                                                |                                                                    |                                                                                  |                                                                                                                                                                                                                                                                                                                                                                                                                                                                      |
|----------------------------------------------------------------------------------------------------------------------------------------------------------------------------------------------------------------------------------------------------------------------------------------------------------------------------------------------------------------------------------------------------------------------------------------------------------------------------------------------------------------------------------------------------------------------------------------------------------------------------------------------------------------------------------------------------------------------------------------------------------------------------------------------------------------------------------------------------------------------------------------------------------------------------------------------------------------------------------------------------------------|--------------------------------------------------------------------|----------------------------------------------------------------------------------|----------------------------------------------------------------------------------------------------------------------------------------------------------------------------------------------------------------------------------------------------------------------------------------------------------------------------------------------------------------------------------------------------------------------------------------------------------------------|
| EPI_ISL_984247, EPI_ISL_984251, EPI_ISL_984253, EPI_ISL_984261                                                                                                                                                                                                                                                                                                                                                                                                                                                                                                                                                                                                                                                                                                                                                                                                                                                                                                                                                 | IAL Regional de Marília                                            | Instituto Adolfo Lutz, Interdisciplinary Procedures Center, Strategic Laboratory | Claudio Tavares Sacchi, Claudia Regina Gonçalves, Erica Valessa Ramos Gomes, Karoline Rodrigues Campos                                                                                                                                                                                                                                                                                                                                                               |
| EPI_ISL_984264                                                                                                                                                                                                                                                                                                                                                                                                                                                                                                                                                                                                                                                                                                                                                                                                                                                                                                                                                                                                 | RSUPN Dr. Cipto Mangunkusumo                                       | National Institute of Health Research and Development                            | Subangkit, Hana Apsari Pawestri, Kartika Dewi Puspa, Arie Ardiansyah Nugraha, Hartanti Dian Ikawati, Krisna Nur Andriana Pangesti, Nuri Dyah Indrasari, Dewi Wulandari, Nelly Puspandari, Vivi Setiawaty                                                                                                                                                                                                                                                             |
| EPI_ISL_984269                                                                                                                                                                                                                                                                                                                                                                                                                                                                                                                                                                                                                                                                                                                                                                                                                                                                                                                                                                                                 | Platform BIS UZA/UAntwerpen                                        | UAntwerp, Laboratory of Medical Microbiology                                     | Basil Britto Xavier, Jasmine Coppens, Marie Le Mercier, Christine Lammens, Veerle Matheeußen, Herman Goossens                                                                                                                                                                                                                                                                                                                                                        |
| EPI_ISL_984276                                                                                                                                                                                                                                                                                                                                                                                                                                                                                                                                                                                                                                                                                                                                                                                                                                                                                                                                                                                                 | National Institute of Health Research and Development              | National Institute of Health Research and Development                            | Holy Arif Wibowo, Ririn Ramadhany, Yuni Rukminiati, Agustiniingsih, Kindi Adam, Hana Apsari Pawestri, Subangkit, Kartika Dewi Puspa, Arie Ardiansyah Nugraha, Hartanti Dian Ikawati, Krisna Nur Andriana Pangesti, Ni Ketut Susilarini, Nur Ika Hariastuti, Uly Alfi Nikmah, Mursinah, Asri Febriyani, Reni Herman, Nike Susanti, Herna, Tati Febriyanti, Natalie Laurencia Kipuw, Fauzul Muna, Irene Lorinda Indalao, Aulia Rizki, Nelly Puspandari, Vivi Setiawaty |
| EPI_ISL_984278, EPI_ISL_984279, EPI_ISL_984280, EPI_ISL_984282, EPI_ISL_984283, EPI_ISL_984284, EPI_ISL_984285, EPI_ISL_984286, EPI_ISL_984287                                                                                                                                                                                                                                                                                                                                                                                                                                                                                                                                                                                                                                                                                                                                                                                                                                                                 | Platform BIS UZA/UAntwerpen                                        | UAntwerp, Laboratory of Medical Microbiology                                     | Basil Britto Xavier, Jasmine Coppens, Marie Le Mercier, Christine Lammens, Veerle Matheeußen, Herman Goossens                                                                                                                                                                                                                                                                                                                                                        |
| EPI_ISL_984305, EPI_ISL_984307                                                                                                                                                                                                                                                                                                                                                                                                                                                                                                                                                                                                                                                                                                                                                                                                                                                                                                                                                                                 | Department of Poultry Diseases                                     | Department of Omics Analysis                                                     | Domanska-Blicharz Katarzyna, Smreczak Marcin, Niemczuk Krzysztof, Orlowska Anna, Ewelina Iwan, Arkadiusz Bomba                                                                                                                                                                                                                                                                                                                                                       |
| EPI_ISL_984309                                                                                                                                                                                                                                                                                                                                                                                                                                                                                                                                                                                                                                                                                                                                                                                                                                                                                                                                                                                                 | National Institute of Health Research and Development              | National Institute of Health Research and Development                            | Agustiniingsih, Kindi Adam, Holy Arif Wibowo, Ririn Ramadhany, Yuni Rukminiati, Hana Apsari Pawestri, Subangkit, Kartika Dewi Puspa, Arie Ardiansyah Nugraha, Hartanti Dian Ikawati, Krisna Nur Andriana Pangesti, Ni Ketut Susilarini, Nur Ika Hariastuti, Uly Alfi Nikmah, Mursinah, Asri Febriyani, Reni Herman, Nike Susanti, Herna, Tati Febriyanti, Natalie Laurencia Kipuw, Fauzul Muna, Irene Lorinda Indalao, Aulia Rizki, Nelly Puspandari, Vivi Setiawaty |
| EPI_ISL_984313                                                                                                                                                                                                                                                                                                                                                                                                                                                                                                                                                                                                                                                                                                                                                                                                                                                                                                                                                                                                 | National Institute of Health Research and Development              | National Institute of Health Research and Development                            | Yuni Rukminiati, Agustiniingsih, Kindi Adam, Holy Arif Wibowo, Ririn Ramadhany, Hana Apsari Pawestri, Subangkit, Kartika Dewi Puspa, Arie Ardiansyah Nugraha, Hartanti Dian Ikawati, Krisna Nur Andriana Pangesti, Ni Ketut Susilarini, Nur Ika Hariastuti, Uly Alfi Nikmah, Mursinah, Asri Febriyani, Reni Herman, Nike Susanti, Herna, Tati Febriyanti, Natalie Laurencia Kipuw, Fauzul Muna, Irene Lorinda Indalao, Aulia Rizki, Nelly Puspandari, Vivi Setiawaty |
| EPI_ISL_984388, EPI_ISL_984446, EPI_ISL_984453, EPI_ISL_984458, EPI_ISL_984459, EPI_ISL_984463, EPI_ISL_984476, EPI_ISL_984480, EPI_ISL_984483                                                                                                                                                                                                                                                                                                                                                                                                                                                                                                                                                                                                                                                                                                                                                                                                                                                                 | California Department of Public Health                             | Chiu Laboratory, University of California, San Francisco                         | Charles Chiu, Xianding (Wayne) Deng, Candace Wang, Venice Servellita, Jill Hacker, Debra Wadford                                                                                                                                                                                                                                                                                                                                                                     |
| EPI_ISL_984678, EPI_ISL_984683                                                                                                                                                                                                                                                                                                                                                                                                                                                                                                                                                                                                                                                                                                                                                                                                                                                                                                                                                                                 | Laboratorio de Virología HUCA                                      | Laboratorio de Virología HUCA                                                    | Sandoval M, Castelló C, Gómez de Oña J, Boga JA, Rojo S, Alvarez-Arguelles ME, Abreu F, Costales I, Perez-Martínez Z, Martín-Rodríguez G, Coto E, Melón S                                                                                                                                                                                                                                                                                                            |
| EPI_ISL_984718, EPI_ISL_984719, EPI_ISL_984722, EPI_ISL_984723, EPI_ISL_984724, EPI_ISL_984725, EPI_ISL_984726, EPI_ISL_984727, EPI_ISL_984728, EPI_ISL_984729, EPI_ISL_984730, EPI_ISL_984731, EPI_ISL_984732, EPI_ISL_984734, EPI_ISL_984735                                                                                                                                                                                                                                                                                                                                                                                                                                                                                                                                                                                                                                                                                                                                                                 |                                                                    |                                                                                  |                                                                                                                                                                                                                                                                                                                                                                                                                                                                      |
| see above                                                                                                                                                                                                                                                                                                                                                                                                                                                                                                                                                                                                                                                                                                                                                                                                                                                                                                                                                                                                      | Klinisk mikrobiologi, Region Västerbotten                          | CBRN Defence and Security, Swedish Defence Research Agency                       | Andreas Sjödin, Linda Karlsson, Emelie Näslund Salomonsson, Jonas Näslund, Stina Bäckman, Malin Granberg, Ingrid Dacklin, Anna-Lena Johansson, Kerstin Myrtenäs, David Sundell, Carolin Öhrman, Mats Forsman, Annika Allard, Annika Osterman                                                                                                                                                                                                                         |
| EPI_ISL_984870, EPI_ISL_984871, EPI_ISL_984872, EPI_ISL_984873, EPI_ISL_984875, EPI_ISL_984879, EPI_ISL_984880, EPI_ISL_984881, EPI_ISL_984882, EPI_ISL_984883, EPI_ISL_984884, EPI_ISL_984885, EPI_ISL_984887, EPI_ISL_984888, EPI_ISL_984889, EPI_ISL_984890, EPI_ISL_984891, EPI_ISL_984892, EPI_ISL_984897, EPI_ISL_984898, EPI_ISL_984899, EPI_ISL_984900, EPI_ISL_984901, EPI_ISL_984902, EPI_ISL_984903, EPI_ISL_984904, EPI_ISL_984905, EPI_ISL_984907, EPI_ISL_984908, EPI_ISL_984909, EPI_ISL_984910, EPI_ISL_984912, EPI_ISL_984913, EPI_ISL_984914, EPI_ISL_984915, EPI_ISL_984916, EPI_ISL_984921, EPI_ISL_984923, EPI_ISL_984924, EPI_ISL_984925, EPI_ISL_984926, EPI_ISL_984927, EPI_ISL_984928, EPI_ISL_984929, EPI_ISL_984930, EPI_ISL_984931, EPI_ISL_984932, EPI_ISL_984933, EPI_ISL_984934, EPI_ISL_984935, EPI_ISL_984936, EPI_ISL_984937, EPI_ISL_984938, EPI_ISL_984939, EPI_ISL_984940, EPI_ISL_984941, EPI_ISL_984942, EPI_ISL_984944, EPI_ISL_984945, EPI_ISL_984946, EPI_ISL_984947 |                                                                    |                                                                                  |                                                                                                                                                                                                                                                                                                                                                                                                                                                                      |
| see above                                                                                                                                                                                                                                                                                                                                                                                                                                                                                                                                                                                                                                                                                                                                                                                                                                                                                                                                                                                                      | Pandemic Response Lab - NYC                                        | Pandemic Response Lab, R&D                                                       | Henry Lee, Michael Hammerling, Melissa Hopkins, Cybill del Castillo, William Ward, Pradeep Bugga, Haiping Hao, Jon Laurent                                                                                                                                                                                                                                                                                                                                           |
| EPI_ISL_984950, EPI_ISL_984952, EPI_ISL_984953, EPI_ISL_984954, EPI_ISL_984955, EPI_ISL_984958, EPI_ISL_984959, EPI_ISL_984960, EPI_ISL_984961, EPI_ISL_984962, EPI_ISL_984964, EPI_ISL_984965, EPI_ISL_984966, EPI_ISL_984968, EPI_ISL_984971, EPI_ISL_984972, EPI_ISL_984973, EPI_ISL_984974, EPI_ISL_984975, EPI_ISL_984976, EPI_ISL_984977, EPI_ISL_984978, EPI_ISL_985056, EPI_ISL_985057                                                                                                                                                                                                                                                                                                                                                                                                                                                                                                                                                                                                                 |                                                                    |                                                                                  |                                                                                                                                                                                                                                                                                                                                                                                                                                                                      |
| see above                                                                                                                                                                                                                                                                                                                                                                                                                                                                                                                                                                                                                                                                                                                                                                                                                                                                                                                                                                                                      | Klinisk mikrobiologi, Region Västerbotten                          | CBRN Defence and Security, Swedish Defence Research Agency                       | Andreas Sjödin, Linda Karlsson, Emelie Näslund Salomonsson, Jonas Näslund, Stina Bäckman, Malin Granberg, Ingrid Dacklin, Anna-Lena Johansson, Kerstin Myrtenäs, David Sundell, Carolin Öhrman, Mats Forsman, Annika Allard, Annika Osterman                                                                                                                                                                                                                         |
| EPI_ISL_985058, EPI_ISL_985060, EPI_ISL_985062, EPI_ISL_985063, EPI_ISL_985064, EPI_ISL_985065, EPI_ISL_985066, EPI_ISL_985068, EPI_ISL_985069, EPI_ISL_985070, EPI_ISL_985071, EPI_ISL_985073, EPI_ISL_985074, EPI_ISL_985075, EPI_ISL_985077, EPI_ISL_985078, EPI_ISL_985080, EPI_ISL_985081, EPI_ISL_985085, EPI_ISL_985086, EPI_ISL_985087, EPI_ISL_985088, EPI_ISL_985089, EPI_ISL_985091, EPI_ISL_985092, EPI_ISL_985095, EPI_ISL_985097, EPI_ISL_985098, EPI_ISL_985099, EPI_ISL_985125, EPI_ISL_985126, EPI_ISL_985128, EPI_ISL_985129                                                                                                                                                                                                                                                                                                                                                                                                                                                                 |                                                                    |                                                                                  |                                                                                                                                                                                                                                                                                                                                                                                                                                                                      |
| see above                                                                                                                                                                                                                                                                                                                                                                                                                                                                                                                                                                                                                                                                                                                                                                                                                                                                                                                                                                                                      | Biorepository and Clinical Virology Laboratory                     | Ozer Lab                                                                         | Ramon Lorenzo-Redondo, Adeola A. Fowotade, Ewean C. Omoruyi, Johnson A. Adeniji, Lacy M. Simons, Judd F. Hultquist, Babafemi O. Taiwo, Olubusuyi M. Adewumi, Egon A. Ozer                                                                                                                                                                                                                                                                                            |
| EPI_ISL_985149, EPI_ISL_985150, EPI_ISL_985151, EPI_ISL_985152, EPI_ISL_985154, EPI_ISL_985155, EPI_ISL_985156                                                                                                                                                                                                                                                                                                                                                                                                                                                                                                                                                                                                                                                                                                                                                                                                                                                                                                 | Instituto Nacional de Medicina Genómica                            | Instituto Nacional de Medicina Genómica                                          | Hidalgo-Miranda A, Mendoza-Vargas A, Reyes-Grajeda JP, Cisneros-Villanueva M, Cedro-Tanda A, Peñaloza-Figueroa F, Herrera-Montalvo LA                                                                                                                                                                                                                                                                                                                                |
| EPI_ISL_985236                                                                                                                                                                                                                                                                                                                                                                                                                                                                                                                                                                                                                                                                                                                                                                                                                                                                                                                                                                                                 | University of Wisconsin-Madison AIDS Vaccine Research Laboratories | University of Wisconsin-Madison AIDS Vaccine Research Laboratories               | Gage Moreno, Katarina Braun, et al. AIDS Vaccine Research Laboratories                                                                                                                                                                                                                                                                                                                                                                                               |
| EPI_ISL_985237, EPI_ISL_985238                                                                                                                                                                                                                                                                                                                                                                                                                                                                                                                                                                                                                                                                                                                                                                                                                                                                                                                                                                                 | Biorepository and Clinical Virology Laboratory                     | Ozer Lab                                                                         | Ramon Lorenzo-Redondo, Adeola A. Fowotade, Ewean C. Omoruyi, Johnson A. Adeniji, Lacy M. Simons, Judd F. Hultquist, Babafemi O. Taiwo, Olubusuyi M. Adewumi, Egon A. Ozer                                                                                                                                                                                                                                                                                            |
| EPI_ISL_985239, EPI_ISL_985252, EPI_ISL_985257, EPI_ISL_985267, EPI_ISL_985268, EPI_ISL_985269, EPI_ISL_985271, EPI_ISL_985273, EPI_ISL_985274, EPI_ISL_985275, EPI_ISL_985277, EPI_ISL_985284, EPI_ISL_985289, EPI_ISL_985294, EPI_ISL_985297, EPI_ISL_985300                                                                                                                                                                                                                                                                                                                                                                                                                                                                                                                                                                                                                                                                                                                                                 |                                                                    |                                                                                  |                                                                                                                                                                                                                                                                                                                                                                                                                                                                      |
| see above                                                                                                                                                                                                                                                                                                                                                                                                                                                                                                                                                                                                                                                                                                                                                                                                                                                                                                                                                                                                      | Delaware Public Health Laboratory (DPHL)                           | Delaware Public Health Lab                                                       | Gregory Hovan                                                                                                                                                                                                                                                                                                                                                                                                                                                        |
| EPI_ISL_985322, EPI_ISL_985323, EPI_ISL_985325, EPI_ISL_985327, EPI_ISL_985329                                                                                                                                                                                                                                                                                                                                                                                                                                                                                                                                                                                                                                                                                                                                                                                                                                                                                                                                 | Klinisk mikrobiologi, Region Västerbotten                          | CBRN Defence and Security, Swedish Defence Research Agency                       | Andreas Sjödin, Linda Karlsson, Emelie Näslund Salomonsson, Jonas Näslund, Stina Bäckman, Malin Granberg, Ingrid Dacklin, Anna-Lena Johansson, Kerstin Myrtenäs, David Sundell, Carolin Öhrman, Mats Forsman, Annika Allard, Annika Osterman                                                                                                                                                                                                                         |
| EPI_ISL_985408, EPI_ISL_985409                                                                                                                                                                                                                                                                                                                                                                                                                                                                                                                                                                                                                                                                                                                                                                                                                                                                                                                                                                                 | Hospital General Universitario Gregorio Marañón                    | Hospital General Universitario Gregorio Marañón                                  | Sergio Buenestado Serrano, Pedro Sola Campoy, Laura Pérez-Lago, Cristina Rodríguez-Grande, Pilar Catalán, Patricia Muñoz, Darío García de Viedma.                                                                                                                                                                                                                                                                                                                    |
| EPI_ISL_985788                                                                                                                                                                                                                                                                                                                                                                                                                                                                                                                                                                                                                                                                                                                                                                                                                                                                                                                                                                                                 | Lighthouse Lab in Alderley Park                                    | Wellcome Sanger Institute for the COVID-19 Genomics UK (COG-UK) Consortium       | Jacquelyn Wynn, Mairead Hyland, The Lighthouse Lab in Alderley Park and Alex Alderton, Roberto Amato, Sonia Goncalves, Ewan Harrison, David K. Jackson, Ian Johnston, Dominic Kwiatkowski, Cordelia Langford, John Sillitoe on behalf of the Wellcome Sanger Institute COVID-19 Surveillance Team                                                                                                                                                                    |
| EPI_ISL_985969, EPI_ISL_985977, EPI_ISL_986002, EPI_ISL_986016, EPI_ISL_986019, EPI_ISL_986035, EPI_ISL_986039, EPI_ISL_986045, EPI_ISL_986075, EPI_ISL_986083, EPI_ISL_986091, EPI_ISL_986093, EPI_ISL_986096                                                                                                                                                                                                                                                                                                                                                                                                                                                                                                                                                                                                                                                                                                                                                                                                 |                                                                    |                                                                                  |                                                                                                                                                                                                                                                                                                                                                                                                                                                                      |
| see above                                                                                                                                                                                                                                                                                                                                                                                                                                                                                                                                                                                                                                                                                                                                                                                                                                                                                                                                                                                                      | Lighthouse Lab in Milton Keynes                                    | Wellcome Sanger Institute for the COVID-19 Genomics UK (COG-UK) Consortium       | The Lighthouse Lab in Milton Keynes and Alex Alderton, Roberto Amato, Sonia Goncalves, Ewan Harrison, David K. Jackson, Ian Johnston, Dominic Kwiatkowski, Cordelia Langford, John Sillitoe on behalf of the Wellcome Sanger Institute COVID-19 Surveillance Team ( <a href="http://www.sanger.ac.uk/covid-team">http://www.sanger.ac.uk/covid-team</a> )                                                                                                            |
| EPI_ISL_987005, EPI_ISL_987104                                                                                                                                                                                                                                                                                                                                                                                                                                                                                                                                                                                                                                                                                                                                                                                                                                                                                                                                                                                 | Lighthouse Lab in Alderley Park                                    | Wellcome Sanger Institute for the COVID-19 Genomics UK (COG-UK) Consortium       | Jacquelyn Wynn, Mairead Hyland, The Lighthouse Lab in Alderley Park and Alex Alderton, Roberto Amato, Sonia Goncalves, Ewan Harrison, David K. Jackson, Ian Johnston, Dominic Kwiatkowski, Cordelia Langford, John Sillitoe on behalf of the Wellcome Sanger Institute COVID-19 Surveillance Team ( <a href="http://www.sanger.ac.uk/covid-team">http://www.sanger.ac.uk/covid-team</a> )                                                                            |
| EPI_ISL_987282                                                                                                                                                                                                                                                                                                                                                                                                                                                                                                                                                                                                                                                                                                                                                                                                                                                                                                                                                                                                 | Lighthouse Lab in Glasgow                                          | Wellcome Sanger Institute for the COVID-19 Genomics UK (COG-UK) Consortium       | Harper VanSteenhouse, Yumi Kasai, David Gray, Carol Clugston, Anna Dominiczak and Alex Alderton, Roberto Amato, Sonia Goncalves, Ewan Harrison, David K. Jackson, Ian Johnston, Dominic Kwiatkowski, Cordelia Langford, John Sillitoe on behalf of the Wellcome Sanger Institute COVID-19 Surveillance Team ( <a href="http://www.sanger.ac.uk/covid-team">http://www.sanger.ac.uk/covid-team</a> )                                                                  |
| EPI_ISL_987286                                                                                                                                                                                                                                                                                                                                                                                                                                                                                                                                                                                                                                                                                                                                                                                                                                                                                                                                                                                                 | Lighthouse Lab in Milton Keynes                                    | Wellcome Sanger Institute for the COVID-19 Genomics UK (COG-UK) Consortium       | The Lighthouse Lab in Milton Keynes and Alex Alderton, Roberto Amato, Sonia Goncalves, Ewan Harrison, David K. Jackson, Ian Johnston, Dominic Kwiatkowski, Cordelia Langford, John Sillitoe on behalf of the Wellcome Sanger Institute COVID-19 Surveillance Team ( <a href="http://www.sanger.ac.uk/covid-team">http://www.sanger.ac.uk/covid-team</a> )                                                                                                            |

|                                                                                                                            |                                                                            |                                                                               |                                                                                                                                                                                                                                                                                                                                                                                                     |
|----------------------------------------------------------------------------------------------------------------------------|----------------------------------------------------------------------------|-------------------------------------------------------------------------------|-----------------------------------------------------------------------------------------------------------------------------------------------------------------------------------------------------------------------------------------------------------------------------------------------------------------------------------------------------------------------------------------------------|
| EPI_ISL_987287, EPI_ISL_987289,<br>EPI_ISL_987291, EPI_ISL_987292,<br>EPI_ISL_987293<br><br>EPI_ISL_987294                 | Lighthouse Lab in Cambridge<br><br><br>Lighthouse Lab in Glasgow           | Wellcome Sanger Institute for the COVID-19 Genomics UK<br>(COG-UK) Consortium | Rob Howes, The Lighthouse Lab in Cambridge and Alex Alderton, Roberto Amato, Sonia Goncalves, Ewan Harrison, David K. Jackson, Ian Johnston, Dominic Kwiatkowski, Cordelia Langford, John Sillitoe on behalf of the Wellcome Sanger Institute COVID-19 Surveillance Team ( <a href="http://www.sanger.ac.uk/covid-team">http://www.sanger.ac.uk/covid-team</a> )                                    |
| EPI_ISL_987295, EPI_ISL_987299,<br>EPI_ISL_987304<br><br>EPI_ISL_987305                                                    | Lighthouse Lab in Cambridge<br><br><br>Lighthouse Lab in Milton Keynes     | Wellcome Sanger Institute for the COVID-19 Genomics UK<br>(COG-UK) Consortium | Rob Howes, The Lighthouse Lab in Cambridge and Alex Alderton, Roberto Amato, Sonia Goncalves, Ewan Harrison, David K. Jackson, Ian Johnston, Dominic Kwiatkowski, Cordelia Langford, John Sillitoe on behalf of the Wellcome Sanger Institute COVID-19 Surveillance Team ( <a href="http://www.sanger.ac.uk/covid-team">http://www.sanger.ac.uk/covid-team</a> )                                    |
| EPI_ISL_987306, EPI_ISL_987307,<br>EPI_ISL_987309, EPI_ISL_987310,<br>EPI_ISL_987313, EPI_ISL_987315<br><br>EPI_ISL_987317 | Lighthouse Lab in Cambridge<br><br><br>Lighthouse Lab in Glasgow           | Wellcome Sanger Institute for the COVID-19 Genomics UK<br>(COG-UK) Consortium | Rob Howes, The Lighthouse Lab in Cambridge and Alex Alderton, Roberto Amato, Sonia Goncalves, Ewan Harrison, David K. Jackson, Ian Johnston, Dominic Kwiatkowski, Cordelia Langford, John Sillitoe on behalf of the Wellcome Sanger Institute COVID-19 Surveillance Team ( <a href="http://www.sanger.ac.uk/covid-team">http://www.sanger.ac.uk/covid-team</a> )                                    |
| EPI_ISL_987318, EPI_ISL_987319,<br>EPI_ISL_987322<br><br>EPI_ISL_987323                                                    | Lighthouse Lab in Cambridge<br><br><br>Lighthouse Lab in Glasgow           | Wellcome Sanger Institute for the COVID-19 Genomics UK<br>(COG-UK) Consortium | Rob Howes, The Lighthouse Lab in Cambridge and Alex Alderton, Roberto Amato, Sonia Goncalves, Ewan Harrison, David K. Jackson, Ian Johnston, Dominic Kwiatkowski, Cordelia Langford, John Sillitoe on behalf of the Wellcome Sanger Institute COVID-19 Surveillance Team ( <a href="http://www.sanger.ac.uk/covid-team">http://www.sanger.ac.uk/covid-team</a> )                                    |
| EPI_ISL_987325, EPI_ISL_987326<br><br>EPI_ISL_987333                                                                       | Lighthouse Lab in Cambridge<br><br><br>Lighthouse Lab in Alderley Park     | Wellcome Sanger Institute for the COVID-19 Genomics UK<br>(COG-UK) Consortium | Rob Howes, The Lighthouse Lab in Cambridge and Alex Alderton, Roberto Amato, Sonia Goncalves, Ewan Harrison, David K. Jackson, Ian Johnston, Dominic Kwiatkowski, Cordelia Langford, John Sillitoe on behalf of the Wellcome Sanger Institute COVID-19 Surveillance Team ( <a href="http://www.sanger.ac.uk/covid-team">http://www.sanger.ac.uk/covid-team</a> )                                    |
| EPI_ISL_987334<br><br>EPI_ISL_987336                                                                                       | Lighthouse Lab in Milton Keynes<br><br><br>Lighthouse Lab in Alderley Park | Wellcome Sanger Institute for the COVID-19 Genomics UK<br>(COG-UK) Consortium | Jacquelyn Wynn, Mairead Hyland, The Lighthouse Lab in Alderley Park and Alex Alderton, Roberto Amato, Sonia Goncalves, Ewan Harrison, David K. Jackson, Ian Johnston, Dominic Kwiatkowski, Cordelia Langford, John Sillitoe on behalf of the Wellcome Sanger Institute COVID-19 Surveillance Team ( <a href="http://www.sanger.ac.uk/covid-team">http://www.sanger.ac.uk/covid-team</a> )           |
| EPI_ISL_987338<br><br>EPI_ISL_987339, EPI_ISL_987340                                                                       | Lighthouse Lab in Alderley Park<br><br><br>Lighthouse Lab in Cambridge     | Wellcome Sanger Institute for the COVID-19 Genomics UK<br>(COG-UK) Consortium | The Lighthouse Lab in Milton Keynes and Alex Alderton, Roberto Amato, Sonia Goncalves, Ewan Harrison, David K. Jackson, Ian Johnston, Dominic Kwiatkowski, Cordelia Langford, John Sillitoe on behalf of the Wellcome Sanger Institute COVID-19 Surveillance Team ( <a href="http://www.sanger.ac.uk/covid-team">http://www.sanger.ac.uk/covid-team</a> )                                           |
| EPI_ISL_987341<br><br>EPI_ISL_987342, EPI_ISL_987346                                                                       | Lighthouse Lab in Glasgow<br><br><br>Lighthouse Lab in Milton Keynes       | Wellcome Sanger Institute for the COVID-19 Genomics UK<br>(COG-UK) Consortium | Jacquelyn Wynn, Mairead Hyland, The Lighthouse Lab in Alderley Park and Alex Alderton, Roberto Amato, Sonia Goncalves, Ewan Harrison, David K. Jackson, Ian Johnston, Dominic Kwiatkowski, Cordelia Langford, John Sillitoe on behalf of the Wellcome Sanger Institute COVID-19 Surveillance Team ( <a href="http://www.sanger.ac.uk/covid-team">http://www.sanger.ac.uk/covid-team</a> )           |
| EPI_ISL_987347<br><br>EPI_ISL_987348                                                                                       | Lighthouse Lab in Glasgow<br><br><br>Lighthouse Lab in Cambridge           | Wellcome Sanger Institute for the COVID-19 Genomics UK<br>(COG-UK) Consortium | The Lighthouse Lab in Milton Keynes and Alex Alderton, Roberto Amato, Sonia Goncalves, Ewan Harrison, David K. Jackson, Ian Johnston, Dominic Kwiatkowski, Cordelia Langford, John Sillitoe on behalf of the Wellcome Sanger Institute COVID-19 Surveillance Team ( <a href="http://www.sanger.ac.uk/covid-team">http://www.sanger.ac.uk/covid-team</a> )                                           |
| EPI_ISL_987349, EPI_ISL_987350<br><br>EPI_ISL_987353, EPI_ISL_987356,<br>EPI_ISL_987358                                    | Lighthouse Lab in Cambridge<br><br><br>Lighthouse Lab in Milton Keynes     | Wellcome Sanger Institute for the COVID-19 Genomics UK<br>(COG-UK) Consortium | Rob Howes, The Lighthouse Lab in Cambridge and Alex Alderton, Roberto Amato, Sonia Goncalves, Ewan Harrison, David K. Jackson, Ian Johnston, Dominic Kwiatkowski, Cordelia Langford, John Sillitoe on behalf of the Wellcome Sanger Institute COVID-19 Surveillance Team ( <a href="http://www.sanger.ac.uk/covid-team">http://www.sanger.ac.uk/covid-team</a> )                                    |
| EPI_ISL_987359<br><br>EPI_ISL_987361                                                                                       | Lighthouse Lab in Glasgow<br><br><br>Lighthouse Lab in Cambridge           | Wellcome Sanger Institute for the COVID-19 Genomics UK<br>(COG-UK) Consortium | Harper VanSteenhouse, Yumi Kasai, David Gray, Carol Clugston, Anna Dominiczak and Alex Alderton, Roberto Amato, Sonia Goncalves, Ewan Harrison, David K. Jackson, Ian Johnston, Dominic Kwiatkowski, Cordelia Langford, John Sillitoe on behalf of the Wellcome Sanger Institute COVID-19 Surveillance Team ( <a href="http://www.sanger.ac.uk/covid-team">http://www.sanger.ac.uk/covid-team</a> ) |
| EPI_ISL_987362<br><br>EPI_ISL_987364, EPI_ISL_987366                                                                       | Lighthouse Lab in Cambridge<br><br><br>Lighthouse Lab in Milton Keynes     | Wellcome Sanger Institute for the COVID-19 Genomics UK<br>(COG-UK) Consortium | Rob Howes, The Lighthouse Lab in Cambridge and Alex Alderton, Roberto Amato, Sonia Goncalves, Ewan Harrison, David K. Jackson, Ian Johnston, Dominic Kwiatkowski, Cordelia Langford, John Sillitoe on behalf of the Wellcome Sanger Institute COVID-19 Surveillance Team ( <a href="http://www.sanger.ac.uk/covid-team">http://www.sanger.ac.uk/covid-team</a> )                                    |
| EPI_ISL_987367, EPI_ISL_987368,<br>EPI_ISL_987369                                                                          | Lighthouse Lab in Glasgow<br><br><br>Lighthouse Lab in Cambridge           | Wellcome Sanger Institute for the COVID-19 Genomics UK<br>(COG-UK) Consortium | Harper VanSteenhouse, Yumi Kasai, David Gray, Carol Clugston, Anna Dominiczak and Alex Alderton, Roberto Amato, Sonia Goncalves, Ewan Harrison, David K. Jackson, Ian Johnston, Dominic Kwiatkowski, Cordelia Langford, John Sillitoe on behalf of the Wellcome Sanger Institute COVID-19 Surveillance Team ( <a href="http://www.sanger.ac.uk/covid-team">http://www.sanger.ac.uk/covid-team</a> ) |





[illegible]



[illegible]

[illegible]

|                                                                                                                                                                                                                                                                                                                                                                                                                                                                                                                                                                                                                                                                                                                                                                                                                                                                                                                                                                                                                                                                                                                                                                                                                                                                                                                                                                                                                                                                                                                                                                                                                                                                                                                                                                                                                                                                                                                                                                                                                                                                                                                                                                                                                                                                                                                                                                                                                                                                                                                                                                                                                                                                                                                                                                                                                                                                                                                                                                                                                                                                                                                                                                                                                                                                                                                                                                                                                                                                                                                                                                                                                                                                                                                                                                                                                                                                                                                                                                                                                                                                                                                                                                                                                                                                                                                                                                                                                                                                                                                                                                                                                                                                                                                                                                                                                                                                                |           |                                 |                                                                            |                                                                                                                                                                                                                                                                                                             |
|--------------------------------------------------------------------------------------------------------------------------------------------------------------------------------------------------------------------------------------------------------------------------------------------------------------------------------------------------------------------------------------------------------------------------------------------------------------------------------------------------------------------------------------------------------------------------------------------------------------------------------------------------------------------------------------------------------------------------------------------------------------------------------------------------------------------------------------------------------------------------------------------------------------------------------------------------------------------------------------------------------------------------------------------------------------------------------------------------------------------------------------------------------------------------------------------------------------------------------------------------------------------------------------------------------------------------------------------------------------------------------------------------------------------------------------------------------------------------------------------------------------------------------------------------------------------------------------------------------------------------------------------------------------------------------------------------------------------------------------------------------------------------------------------------------------------------------------------------------------------------------------------------------------------------------------------------------------------------------------------------------------------------------------------------------------------------------------------------------------------------------------------------------------------------------------------------------------------------------------------------------------------------------------------------------------------------------------------------------------------------------------------------------------------------------------------------------------------------------------------------------------------------------------------------------------------------------------------------------------------------------------------------------------------------------------------------------------------------------------------------------------------------------------------------------------------------------------------------------------------------------------------------------------------------------------------------------------------------------------------------------------------------------------------------------------------------------------------------------------------------------------------------------------------------------------------------------------------------------------------------------------------------------------------------------------------------------------------------------------------------------------------------------------------------------------------------------------------------------------------------------------------------------------------------------------------------------------------------------------------------------------------------------------------------------------------------------------------------------------------------------------------------------------------------------------------------------------------------------------------------------------------------------------------------------------------------------------------------------------------------------------------------------------------------------------------------------------------------------------------------------------------------------------------------------------------------------------------------------------------------------------------------------------------------------------------------------------------------------------------------------------------------------------------------------------------------------------------------------------------------------------------------------------------------------------------------------------------------------------------------------------------------------------------------------------------------------------------------------------------------------------------------------------------------------------------------------------------------------------------------------|-----------|---------------------------------|----------------------------------------------------------------------------|-------------------------------------------------------------------------------------------------------------------------------------------------------------------------------------------------------------------------------------------------------------------------------------------------------------|
| EPI_ISL_990571, EPI_ISL_990575, EPI_ISL_990579, EPI_ISL_990582, EPI_ISL_990583, EPI_ISL_990584, EPI_ISL_990585, EPI_ISL_990587, EPI_ISL_990588, EPI_ISL_990589, EPI_ISL_990590, EPI_ISL_990591, EPI_ISL_990592, EPI_ISL_990595, EPI_ISL_990596, EPI_ISL_990598, EPI_ISL_990599, EPI_ISL_990600, EPI_ISL_990609, EPI_ISL_990610, EPI_ISL_990611, EPI_ISL_990617, EPI_ISL_990618, EPI_ISL_990621, EPI_ISL_990622, EPI_ISL_990627, EPI_ISL_990628, EPI_ISL_990631, EPI_ISL_990630, EPI_ISL_990632, EPI_ISL_990633, EPI_ISL_990642, EPI_ISL_990643, EPI_ISL_990644, EPI_ISL_990649, EPI_ISL_990650, EPI_ISL_990651, EPI_ISL_990652, EPI_ISL_990654, EPI_ISL_990656, EPI_ISL_990661, EPI_ISL_990662, EPI_ISL_990663, EPI_ISL_990664, EPI_ISL_990666, EPI_ISL_990668, EPI_ISL_990671, EPI_ISL_990673, EPI_ISL_990676, EPI_ISL_990677, EPI_ISL_990678, EPI_ISL_990679, EPI_ISL_990680, EPI_ISL_990681, EPI_ISL_990683, EPI_ISL_990691, EPI_ISL_990692, EPI_ISL_990693, EPI_ISL_990698, EPI_ISL_990700, EPI_ISL_990702, EPI_ISL_990706, EPI_ISL_990709, EPI_ISL_990711, EPI_ISL_990712, EPI_ISL_990716, EPI_ISL_990717, EPI_ISL_990718, EPI_ISL_990724, EPI_ISL_990727, EPI_ISL_990728, EPI_ISL_990730, EPI_ISL_990731, EPI_ISL_990733, EPI_ISL_990734, EPI_ISL_990735, EPI_ISL_990737, EPI_ISL_990739, EPI_ISL_990740, EPI_ISL_990741, EPI_ISL_990742, EPI_ISL_990746, EPI_ISL_990747, EPI_ISL_990748, EPI_ISL_990749, EPI_ISL_990750, EPI_ISL_990752, EPI_ISL_990753, EPI_ISL_990757, EPI_ISL_990758, EPI_ISL_990764, EPI_ISL_990765, EPI_ISL_990766, EPI_ISL_990773, EPI_ISL_990775, EPI_ISL_990776, EPI_ISL_990777, EPI_ISL_990778, EPI_ISL_990779, EPI_ISL_990781, EPI_ISL_990787, EPI_ISL_990788, EPI_ISL_990791, EPI_ISL_990792, EPI_ISL_990798, EPI_ISL_990799, EPI_ISL_990800, EPI_ISL_990804, EPI_ISL_990805, EPI_ISL_990806, EPI_ISL_990807, EPI_ISL_990810, EPI_ISL_990811, EPI_ISL_990812, EPI_ISL_990813, EPI_ISL_990816, EPI_ISL_990817, EPI_ISL_990818, EPI_ISL_990819, EPI_ISL_990822, EPI_ISL_990823, EPI_ISL_990824, EPI_ISL_990826, EPI_ISL_990827, EPI_ISL_990830, EPI_ISL_990833, EPI_ISL_990834, EPI_ISL_990835, EPI_ISL_990836, EPI_ISL_990837, EPI_ISL_990843, EPI_ISL_990848, EPI_ISL_990849, EPI_ISL_990854, EPI_ISL_990856, EPI_ISL_990858, EPI_ISL_990860, EPI_ISL_990861, EPI_ISL_990870, EPI_ISL_990876, EPI_ISL_990880, EPI_ISL_990881, EPI_ISL_990882, EPI_ISL_990885, EPI_ISL_990887, EPI_ISL_990888, EPI_ISL_990889, EPI_ISL_990891, EPI_ISL_990892, EPI_ISL_990893, EPI_ISL_990894, EPI_ISL_990895, EPI_ISL_990896, EPI_ISL_990897, EPI_ISL_990898, EPI_ISL_990899, EPI_ISL_990900, EPI_ISL_990902, EPI_ISL_990905, EPI_ISL_990909, EPI_ISL_990910, EPI_ISL_990911, EPI_ISL_990918, EPI_ISL_990924, EPI_ISL_990925, EPI_ISL_990926, EPI_ISL_990931, EPI_ISL_990933, EPI_ISL_990934, EPI_ISL_990935, EPI_ISL_990937, EPI_ISL_990938, EPI_ISL_990940, EPI_ISL_990941, EPI_ISL_990942, EPI_ISL_990944, EPI_ISL_990946, EPI_ISL_990947, EPI_ISL_990949, EPI_ISL_990950, EPI_ISL_990952, EPI_ISL_990955, EPI_ISL_990958, EPI_ISL_990960, EPI_ISL_990961, EPI_ISL_990962, EPI_ISL_990964, EPI_ISL_990971, EPI_ISL_990975, EPI_ISL_990976, EPI_ISL_990977, EPI_ISL_990981, EPI_ISL_990983, EPI_ISL_990986, EPI_ISL_990989, EPI_ISL_990991, EPI_ISL_990996, EPI_ISL_991000, EPI_ISL_991001, EPI_ISL_991004, EPI_ISL_991005, EPI_ISL_991006, EPI_ISL_991011, EPI_ISL_991015, EPI_ISL_991016, EPI_ISL_991017, EPI_ISL_991019, EPI_ISL_991021, EPI_ISL_991025, EPI_ISL_991026, EPI_ISL_991030, EPI_ISL_991037, EPI_ISL_991038, EPI_ISL_991039, EPI_ISL_991043, EPI_ISL_991044, EPI_ISL_991049, EPI_ISL_991050, EPI_ISL_991052, EPI_ISL_991055, EPI_ISL_991063, EPI_ISL_991064, EPI_ISL_991069, EPI_ISL_991071, EPI_ISL_991072, EPI_ISL_991081, EPI_ISL_991082, EPI_ISL_991083, EPI_ISL_991084, EPI_ISL_991086, EPI_ISL_991088, EPI_ISL_991093, EPI_ISL_991094, EPI_ISL_991098, EPI_ISL_991099, EPI_ISL_991100, EPI_ISL_991102, EPI_ISL_991103, EPI_ISL_991104, EPI_ISL_991110, EPI_ISL_991111, EPI_ISL_991114, EPI_ISL_991117, EPI_ISL_991119, EPI_ISL_991125, EPI_ISL_991129, EPI_ISL_991137, EPI_ISL_991139, EPI_ISL_991143, EPI_ISL_991144, EPI_ISL_991145, EPI_ISL_991146, EPI_ISL_991155, EPI_ISL_991157, EPI_ISL_991160, EPI_ISL_991162, EPI_ISL_991170, EPI_ISL_991179, EPI_ISL_991183, EPI_ISL_991187, EPI_ISL_991190, EPI_ISL_991195, EPI_ISL_991200, EPI_ISL_991203, EPI_ISL_991205, EPI_ISL_991206, EPI_ISL_991210, EPI_ISL_991213, EPI_ISL_991215, EPI_ISL_991216, EPI_ISL_991218, EPI_ISL_991227, EPI_ISL_991231, EPI_ISL_991240, EPI_ISL_991241, EPI_ISL_991246, EPI_ISL_991256, EPI_ISL_991257, EPI_ISL_991260, EPI_ISL_991263, EPI_ISL_991264, EPI_ISL_991268, EPI_ISL_991271, EPI_ISL_991272, EPI_ISL_991273, EPI_ISL_991277, EPI_ISL_991283, EPI_ISL_991287, EPI_ISL_991290, EPI_ISL_991291, EPI_ISL_991304, EPI_ISL_991305, EPI_ISL_991308 | see above | Lighthouse Lab in Alderley Park | Wellcome Sanger Institute for the COVID-19 Genomics UK (COG-UK) Consortium | Jacquelyn Wynn, Mairead Hyland, The Lighthouse Lab in Alderley Park and Alex Alderton, Roberto Amato, Sonia Goncalves, Ewan Harrison, David K. Jackson, Ian Johnston, Dominic Kwiatkowski, Cordelia Langford, John Sillitoe on behalf of the Wellcome Sanger Institute COVID-19 Surveillance Team           |
| EPI_ISL_991351                                                                                                                                                                                                                                                                                                                                                                                                                                                                                                                                                                                                                                                                                                                                                                                                                                                                                                                                                                                                                                                                                                                                                                                                                                                                                                                                                                                                                                                                                                                                                                                                                                                                                                                                                                                                                                                                                                                                                                                                                                                                                                                                                                                                                                                                                                                                                                                                                                                                                                                                                                                                                                                                                                                                                                                                                                                                                                                                                                                                                                                                                                                                                                                                                                                                                                                                                                                                                                                                                                                                                                                                                                                                                                                                                                                                                                                                                                                                                                                                                                                                                                                                                                                                                                                                                                                                                                                                                                                                                                                                                                                                                                                                                                                                                                                                                                                                 |           | Lighthouse Lab in Milton Keynes | Wellcome Sanger Institute for the COVID-19 Genomics UK (COG-UK) Consortium | The Lighthouse Lab in Milton Keynes and Alex Alderton, Roberto Amato, Sonia Goncalves, Ewan Harrison, David K. Jackson, Ian Johnston, Dominic Kwiatkowski, Cordelia Langford, John Sillitoe on behalf of the Wellcome Sanger Institute COVID-19 Surveillance Team                                           |
| EPI_ISL_991352, EPI_ISL_991353, EPI_ISL_991356                                                                                                                                                                                                                                                                                                                                                                                                                                                                                                                                                                                                                                                                                                                                                                                                                                                                                                                                                                                                                                                                                                                                                                                                                                                                                                                                                                                                                                                                                                                                                                                                                                                                                                                                                                                                                                                                                                                                                                                                                                                                                                                                                                                                                                                                                                                                                                                                                                                                                                                                                                                                                                                                                                                                                                                                                                                                                                                                                                                                                                                                                                                                                                                                                                                                                                                                                                                                                                                                                                                                                                                                                                                                                                                                                                                                                                                                                                                                                                                                                                                                                                                                                                                                                                                                                                                                                                                                                                                                                                                                                                                                                                                                                                                                                                                                                                 |           | Lighthouse Lab in Glasgow       | Wellcome Sanger Institute for the COVID-19 Genomics UK (COG-UK) Consortium | Harper VanSteenhouse, Yumi Kasai, David Gray, Carol Clugston, Anna Dominiczak and Alex Alderton, Roberto Amato, Sonia Goncalves, Ewan Harrison, David K. Jackson, Ian Johnston, Dominic Kwiatkowski, Cordelia Langford, John Sillitoe on behalf of the Wellcome Sanger Institute COVID-19 Surveillance Team |
| EPI_ISL_991358, EPI_ISL_991359                                                                                                                                                                                                                                                                                                                                                                                                                                                                                                                                                                                                                                                                                                                                                                                                                                                                                                                                                                                                                                                                                                                                                                                                                                                                                                                                                                                                                                                                                                                                                                                                                                                                                                                                                                                                                                                                                                                                                                                                                                                                                                                                                                                                                                                                                                                                                                                                                                                                                                                                                                                                                                                                                                                                                                                                                                                                                                                                                                                                                                                                                                                                                                                                                                                                                                                                                                                                                                                                                                                                                                                                                                                                                                                                                                                                                                                                                                                                                                                                                                                                                                                                                                                                                                                                                                                                                                                                                                                                                                                                                                                                                                                                                                                                                                                                                                                 |           | Lighthouse Lab in Milton Keynes | Wellcome Sanger Institute for the COVID-19 Genomics UK (COG-UK) Consortium | The Lighthouse Lab in Milton Keynes and Alex Alderton, Roberto Amato, Sonia Goncalves, Ewan Harrison, David K. Jackson, Ian Johnston, Dominic Kwiatkowski, Cordelia Langford, John Sillitoe on behalf of the Wellcome Sanger Institute COVID-19 Surveillance Team                                           |
| EPI_ISL_991365, EPI_ISL_991366                                                                                                                                                                                                                                                                                                                                                                                                                                                                                                                                                                                                                                                                                                                                                                                                                                                                                                                                                                                                                                                                                                                                                                                                                                                                                                                                                                                                                                                                                                                                                                                                                                                                                                                                                                                                                                                                                                                                                                                                                                                                                                                                                                                                                                                                                                                                                                                                                                                                                                                                                                                                                                                                                                                                                                                                                                                                                                                                                                                                                                                                                                                                                                                                                                                                                                                                                                                                                                                                                                                                                                                                                                                                                                                                                                                                                                                                                                                                                                                                                                                                                                                                                                                                                                                                                                                                                                                                                                                                                                                                                                                                                                                                                                                                                                                                                                                 |           | Lighthouse Lab in Glasgow       | Wellcome Sanger Institute for the COVID-19 Genomics UK (COG-UK) Consortium | Harper VanSteenhouse, Yumi Kasai, David Gray, Carol Clugston, Anna Dominiczak and Alex Alderton, Roberto Amato, Sonia Goncalves, Ewan Harrison, David K. Jackson, Ian Johnston, Dominic Kwiatkowski, Cordelia Langford, John Sillitoe on behalf of the Wellcome Sanger Institute COVID-19 Surveillance Team |
| EPI_ISL_991367                                                                                                                                                                                                                                                                                                                                                                                                                                                                                                                                                                                                                                                                                                                                                                                                                                                                                                                                                                                                                                                                                                                                                                                                                                                                                                                                                                                                                                                                                                                                                                                                                                                                                                                                                                                                                                                                                                                                                                                                                                                                                                                                                                                                                                                                                                                                                                                                                                                                                                                                                                                                                                                                                                                                                                                                                                                                                                                                                                                                                                                                                                                                                                                                                                                                                                                                                                                                                                                                                                                                                                                                                                                                                                                                                                                                                                                                                                                                                                                                                                                                                                                                                                                                                                                                                                                                                                                                                                                                                                                                                                                                                                                                                                                                                                                                                                                                 |           | Lighthouse Lab in Milton Keynes | Wellcome Sanger Institute for the COVID-19 Genomics UK (COG-UK) Consortium | The Lighthouse Lab in Milton Keynes and Alex Alderton, Roberto Amato, Sonia Goncalves, Ewan Harrison, David K. Jackson, Ian Johnston, Dominic Kwiatkowski, Cordelia Langford, John Sillitoe on behalf of the Wellcome Sanger Institute COVID-19 Surveillance Team                                           |
| EPI_ISL_991371, EPI_ISL_991373, EPI_ISL_991375, EPI_ISL_991376                                                                                                                                                                                                                                                                                                                                                                                                                                                                                                                                                                                                                                                                                                                                                                                                                                                                                                                                                                                                                                                                                                                                                                                                                                                                                                                                                                                                                                                                                                                                                                                                                                                                                                                                                                                                                                                                                                                                                                                                                                                                                                                                                                                                                                                                                                                                                                                                                                                                                                                                                                                                                                                                                                                                                                                                                                                                                                                                                                                                                                                                                                                                                                                                                                                                                                                                                                                                                                                                                                                                                                                                                                                                                                                                                                                                                                                                                                                                                                                                                                                                                                                                                                                                                                                                                                                                                                                                                                                                                                                                                                                                                                                                                                                                                                                                                 |           | Lighthouse Lab in Glasgow       | Wellcome Sanger Institute for the COVID-19 Genomics UK (COG-UK) Consortium | Harper VanSteenhouse, Yumi Kasai, David Gray, Carol Clugston, Anna Dominiczak and Alex Alderton, Roberto Amato, Sonia Goncalves, Ewan Harrison, David K. Jackson, Ian Johnston, Dominic Kwiatkowski, Cordelia Langford, John Sillitoe on behalf of the Wellcome Sanger Institute COVID-19 Surveillance Team |
| EPI_ISL_991377, EPI_ISL_991379, EPI_ISL_991381, EPI_ISL_991382, EPI_ISL_991383                                                                                                                                                                                                                                                                                                                                                                                                                                                                                                                                                                                                                                                                                                                                                                                                                                                                                                                                                                                                                                                                                                                                                                                                                                                                                                                                                                                                                                                                                                                                                                                                                                                                                                                                                                                                                                                                                                                                                                                                                                                                                                                                                                                                                                                                                                                                                                                                                                                                                                                                                                                                                                                                                                                                                                                                                                                                                                                                                                                                                                                                                                                                                                                                                                                                                                                                                                                                                                                                                                                                                                                                                                                                                                                                                                                                                                                                                                                                                                                                                                                                                                                                                                                                                                                                                                                                                                                                                                                                                                                                                                                                                                                                                                                                                                                                 |           | Lighthouse Lab in Milton Keynes | Wellcome Sanger Institute for the COVID-19 Genomics UK (COG-UK) Consortium | The Lighthouse Lab in Milton Keynes and Alex Alderton, Roberto Amato, Sonia Goncalves, Ewan Harrison, David K. Jackson, Ian Johnston, Dominic Kwiatkowski, Cordelia Langford, John Sillitoe on behalf of the Wellcome Sanger Institute COVID-19 Surveillance Team                                           |
| EPI_ISL_991384                                                                                                                                                                                                                                                                                                                                                                                                                                                                                                                                                                                                                                                                                                                                                                                                                                                                                                                                                                                                                                                                                                                                                                                                                                                                                                                                                                                                                                                                                                                                                                                                                                                                                                                                                                                                                                                                                                                                                                                                                                                                                                                                                                                                                                                                                                                                                                                                                                                                                                                                                                                                                                                                                                                                                                                                                                                                                                                                                                                                                                                                                                                                                                                                                                                                                                                                                                                                                                                                                                                                                                                                                                                                                                                                                                                                                                                                                                                                                                                                                                                                                                                                                                                                                                                                                                                                                                                                                                                                                                                                                                                                                                                                                                                                                                                                                                                                 |           | Lighthouse Lab in Glasgow       | Wellcome Sanger Institute for the COVID-19 Genomics UK (COG-UK) Consortium | Harper VanSteenhouse, Yumi Kasai, David Gray, Carol Clugston, Anna Dominiczak and Alex Alderton, Roberto Amato, Sonia Goncalves, Ewan Harrison, David K. Jackson, Ian Johnston, Dominic Kwiatkowski, Cordelia Langford, John Sillitoe on behalf of the Wellcome Sanger Institute COVID-19 Surveillance Team |
| EPI_ISL_991386, EPI_ISL_991387                                                                                                                                                                                                                                                                                                                                                                                                                                                                                                                                                                                                                                                                                                                                                                                                                                                                                                                                                                                                                                                                                                                                                                                                                                                                                                                                                                                                                                                                                                                                                                                                                                                                                                                                                                                                                                                                                                                                                                                                                                                                                                                                                                                                                                                                                                                                                                                                                                                                                                                                                                                                                                                                                                                                                                                                                                                                                                                                                                                                                                                                                                                                                                                                                                                                                                                                                                                                                                                                                                                                                                                                                                                                                                                                                                                                                                                                                                                                                                                                                                                                                                                                                                                                                                                                                                                                                                                                                                                                                                                                                                                                                                                                                                                                                                                                                                                 |           | Lighthouse Lab in Milton Keynes | Wellcome Sanger Institute for the COVID-19 Genomics UK (COG-UK) Consortium | The Lighthouse Lab in Milton Keynes and Alex Alderton, Roberto Amato, Sonia Goncalves, Ewan Harrison, David K. Jackson, Ian Johnston, Dominic Kwiatkowski, Cordelia Langford, John Sillitoe on behalf of the Wellcome Sanger Institute COVID-19 Surveillance Team                                           |
| EPI_ISL_991390, EPI_ISL_991392, EPI_ISL_991393                                                                                                                                                                                                                                                                                                                                                                                                                                                                                                                                                                                                                                                                                                                                                                                                                                                                                                                                                                                                                                                                                                                                                                                                                                                                                                                                                                                                                                                                                                                                                                                                                                                                                                                                                                                                                                                                                                                                                                                                                                                                                                                                                                                                                                                                                                                                                                                                                                                                                                                                                                                                                                                                                                                                                                                                                                                                                                                                                                                                                                                                                                                                                                                                                                                                                                                                                                                                                                                                                                                                                                                                                                                                                                                                                                                                                                                                                                                                                                                                                                                                                                                                                                                                                                                                                                                                                                                                                                                                                                                                                                                                                                                                                                                                                                                                                                 |           | Lighthouse Lab in Glasgow       | Wellcome Sanger Institute for the COVID-19 Genomics UK (COG-UK) Consortium | Harper VanSteenhouse, Yumi Kasai, David Gray, Carol Clugston, Anna Dominiczak and Alex Alderton, Roberto Amato, Sonia Goncalves, Ewan Harrison, David K. Jackson, Ian Johnston, Dominic Kwiatkowski, Cordelia Langford, John Sillitoe on behalf of the Wellcome Sanger Institute COVID-19 Surveillance Team |
| EPI_ISL_991395, EPI_ISL_991397                                                                                                                                                                                                                                                                                                                                                                                                                                                                                                                                                                                                                                                                                                                                                                                                                                                                                                                                                                                                                                                                                                                                                                                                                                                                                                                                                                                                                                                                                                                                                                                                                                                                                                                                                                                                                                                                                                                                                                                                                                                                                                                                                                                                                                                                                                                                                                                                                                                                                                                                                                                                                                                                                                                                                                                                                                                                                                                                                                                                                                                                                                                                                                                                                                                                                                                                                                                                                                                                                                                                                                                                                                                                                                                                                                                                                                                                                                                                                                                                                                                                                                                                                                                                                                                                                                                                                                                                                                                                                                                                                                                                                                                                                                                                                                                                                                                 |           | Lighthouse Lab in Milton Keynes | Wellcome Sanger Institute for the COVID-19 Genomics UK (COG-UK) Consortium | The Lighthouse Lab in Milton Keynes and Alex Alderton, Roberto Amato, Sonia Goncalves, Ewan Harrison, David K. Jackson, Ian Johnston, Dominic Kwiatkowski, Cordelia Langford, John Sillitoe on behalf of the Wellcome Sanger Institute COVID-19 Surveillance Team                                           |
| EPI_ISL_991398, EPI_ISL_991400, EPI_ISL_991401                                                                                                                                                                                                                                                                                                                                                                                                                                                                                                                                                                                                                                                                                                                                                                                                                                                                                                                                                                                                                                                                                                                                                                                                                                                                                                                                                                                                                                                                                                                                                                                                                                                                                                                                                                                                                                                                                                                                                                                                                                                                                                                                                                                                                                                                                                                                                                                                                                                                                                                                                                                                                                                                                                                                                                                                                                                                                                                                                                                                                                                                                                                                                                                                                                                                                                                                                                                                                                                                                                                                                                                                                                                                                                                                                                                                                                                                                                                                                                                                                                                                                                                                                                                                                                                                                                                                                                                                                                                                                                                                                                                                                                                                                                                                                                                                                                 |           | Lighthouse Lab in Glasgow       | Wellcome Sanger Institute for the COVID-19 Genomics UK (COG-UK) Consortium | Harper VanSteenhouse, Yumi Kasai, David Gray, Carol Clugston, Anna Dominiczak and Alex Alderton, Roberto Amato, Sonia Goncalves, Ewan Harrison, David K. Jackson, Ian Johnston, Dominic Kwiatkowski, Cordelia Langford, John Sillitoe on behalf of the Wellcome Sanger Institute COVID-19 Surveillance Team |
| EPI_ISL_991403                                                                                                                                                                                                                                                                                                                                                                                                                                                                                                                                                                                                                                                                                                                                                                                                                                                                                                                                                                                                                                                                                                                                                                                                                                                                                                                                                                                                                                                                                                                                                                                                                                                                                                                                                                                                                                                                                                                                                                                                                                                                                                                                                                                                                                                                                                                                                                                                                                                                                                                                                                                                                                                                                                                                                                                                                                                                                                                                                                                                                                                                                                                                                                                                                                                                                                                                                                                                                                                                                                                                                                                                                                                                                                                                                                                                                                                                                                                                                                                                                                                                                                                                                                                                                                                                                                                                                                                                                                                                                                                                                                                                                                                                                                                                                                                                                                                                 |           | Lighthouse Lab in Milton Keynes | Wellcome Sanger Institute for the COVID-19 Genomics UK (COG-UK) Consortium | The Lighthouse Lab in Milton Keynes and Alex Alderton, Roberto Amato, Sonia Goncalves, Ewan Harrison, David K. Jackson, Ian Johnston, Dominic Kwiatkowski, Cordelia Langford, John Sillitoe on behalf of the Wellcome Sanger Institute COVID-19 Surveillance Team                                           |
| EPI_ISL_991404, EPI_ISL_991405, EPI_ISL_991406, EPI_ISL_991408                                                                                                                                                                                                                                                                                                                                                                                                                                                                                                                                                                                                                                                                                                                                                                                                                                                                                                                                                                                                                                                                                                                                                                                                                                                                                                                                                                                                                                                                                                                                                                                                                                                                                                                                                                                                                                                                                                                                                                                                                                                                                                                                                                                                                                                                                                                                                                                                                                                                                                                                                                                                                                                                                                                                                                                                                                                                                                                                                                                                                                                                                                                                                                                                                                                                                                                                                                                                                                                                                                                                                                                                                                                                                                                                                                                                                                                                                                                                                                                                                                                                                                                                                                                                                                                                                                                                                                                                                                                                                                                                                                                                                                                                                                                                                                                                                 |           | Lighthouse Lab in Glasgow       | Wellcome Sanger Institute for the COVID-19 Genomics UK (COG-UK) Consortium | Harper VanSteenhouse, Yumi Kasai, David Gray, Carol Clugston, Anna Dominiczak and Alex Alderton, Roberto Amato, Sonia Goncalves, Ewan Harrison, David K. Jackson, Ian Johnston, Dominic Kwiatkowski, Cordelia Langford, John Sillitoe on behalf of the Wellcome Sanger Institute COVID-19 Surveillance Team |
| EPI_ISL_991409                                                                                                                                                                                                                                                                                                                                                                                                                                                                                                                                                                                                                                                                                                                                                                                                                                                                                                                                                                                                                                                                                                                                                                                                                                                                                                                                                                                                                                                                                                                                                                                                                                                                                                                                                                                                                                                                                                                                                                                                                                                                                                                                                                                                                                                                                                                                                                                                                                                                                                                                                                                                                                                                                                                                                                                                                                                                                                                                                                                                                                                                                                                                                                                                                                                                                                                                                                                                                                                                                                                                                                                                                                                                                                                                                                                                                                                                                                                                                                                                                                                                                                                                                                                                                                                                                                                                                                                                                                                                                                                                                                                                                                                                                                                                                                                                                                                                 |           | Lighthouse Lab in Milton Keynes | Wellcome Sanger Institute for the COVID-19 Genomics UK (COG-UK) Consortium | The Lighthouse Lab in Milton Keynes and Alex Alderton, Roberto Amato, Sonia Goncalves, Ewan Harrison, David K. Jackson, Ian Johnston, Dominic Kwiatkowski, Cordelia Langford, John Sillitoe on behalf of the Wellcome Sanger Institute COVID-19 Surveillance Team                                           |
| EPI_ISL_991410, EPI_ISL_991413, EPI_ISL_991414, EPI_ISL_991415                                                                                                                                                                                                                                                                                                                                                                                                                                                                                                                                                                                                                                                                                                                                                                                                                                                                                                                                                                                                                                                                                                                                                                                                                                                                                                                                                                                                                                                                                                                                                                                                                                                                                                                                                                                                                                                                                                                                                                                                                                                                                                                                                                                                                                                                                                                                                                                                                                                                                                                                                                                                                                                                                                                                                                                                                                                                                                                                                                                                                                                                                                                                                                                                                                                                                                                                                                                                                                                                                                                                                                                                                                                                                                                                                                                                                                                                                                                                                                                                                                                                                                                                                                                                                                                                                                                                                                                                                                                                                                                                                                                                                                                                                                                                                                                                                 |           | Lighthouse Lab in Glasgow       | Wellcome Sanger Institute for the COVID-19 Genomics UK (COG-UK) Consortium | Harper VanSteenhouse, Yumi Kasai, David Gray, Carol Clugston, Anna Dominiczak and Alex Alderton, Roberto Amato, Sonia Goncalves, Ewan Harrison, David K. Jackson, Ian Johnston, Dominic Kwiatkowski, Cordelia Langford, John Sillitoe on behalf of the Wellcome Sanger Institute COVID-19 Surveillance Team |
| EPI_ISL_991417                                                                                                                                                                                                                                                                                                                                                                                                                                                                                                                                                                                                                                                                                                                                                                                                                                                                                                                                                                                                                                                                                                                                                                                                                                                                                                                                                                                                                                                                                                                                                                                                                                                                                                                                                                                                                                                                                                                                                                                                                                                                                                                                                                                                                                                                                                                                                                                                                                                                                                                                                                                                                                                                                                                                                                                                                                                                                                                                                                                                                                                                                                                                                                                                                                                                                                                                                                                                                                                                                                                                                                                                                                                                                                                                                                                                                                                                                                                                                                                                                                                                                                                                                                                                                                                                                                                                                                                                                                                                                                                                                                                                                                                                                                                                                                                                                                                                 |           | Lighthouse Lab in Milton Keynes | Wellcome Sanger Institute for the COVID-19 Genomics UK (COG-UK) Consortium | The Lighthouse Lab in Milton Keynes and Alex Alderton, Roberto Amato, Sonia Goncalves, Ewan Harrison, David K. Jackson, Ian Johnston, Dominic Kwiatkowski, Cordelia Langford, John Sillitoe on behalf of the Wellcome Sanger Institute COVID-19 Surveillance Team                                           |
| EPI_ISL_991418                                                                                                                                                                                                                                                                                                                                                                                                                                                                                                                                                                                                                                                                                                                                                                                                                                                                                                                                                                                                                                                                                                                                                                                                                                                                                                                                                                                                                                                                                                                                                                                                                                                                                                                                                                                                                                                                                                                                                                                                                                                                                                                                                                                                                                                                                                                                                                                                                                                                                                                                                                                                                                                                                                                                                                                                                                                                                                                                                                                                                                                                                                                                                                                                                                                                                                                                                                                                                                                                                                                                                                                                                                                                                                                                                                                                                                                                                                                                                                                                                                                                                                                                                                                                                                                                                                                                                                                                                                                                                                                                                                                                                                                                                                                                                                                                                                                                 |           | Lighthouse Lab in Glasgow       | Wellcome Sanger Institute for the COVID-19 Genomics UK (COG-UK) Consortium | Harper VanSteenhouse, Yumi Kasai, David Gray, Carol Clugston, Anna Dominiczak and Alex Alderton, Roberto Amato, Sonia Goncalves, Ewan Harrison, David K. Jackson, Ian Johnston, Dominic Kwiatkowski, Cordelia Langford, John Sillitoe on behalf of the Wellcome Sanger Institute COVID-19 Surveillance Team |
| EPI_ISL_991419                                                                                                                                                                                                                                                                                                                                                                                                                                                                                                                                                                                                                                                                                                                                                                                                                                                                                                                                                                                                                                                                                                                                                                                                                                                                                                                                                                                                                                                                                                                                                                                                                                                                                                                                                                                                                                                                                                                                                                                                                                                                                                                                                                                                                                                                                                                                                                                                                                                                                                                                                                                                                                                                                                                                                                                                                                                                                                                                                                                                                                                                                                                                                                                                                                                                                                                                                                                                                                                                                                                                                                                                                                                                                                                                                                                                                                                                                                                                                                                                                                                                                                                                                                                                                                                                                                                                                                                                                                                                                                                                                                                                                                                                                                                                                                                                                                                                 |           | Lighthouse Lab in Milton Keynes | Wellcome Sanger Institute for the COVID-19 Genomics UK (COG-UK) Consortium | The Lighthouse Lab in Milton Keynes and Alex Alderton, Roberto Amato, Sonia Goncalves, Ewan Harrison, David K. Jackson, Ian Johnston, Dominic Kwiatkowski, Cordelia Langford, John Sillitoe on behalf of the Wellcome Sanger Institute COVID-19 Surveillance Team                                           |
| EPI_ISL_991420, EPI_ISL_991421                                                                                                                                                                                                                                                                                                                                                                                                                                                                                                                                                                                                                                                                                                                                                                                                                                                                                                                                                                                                                                                                                                                                                                                                                                                                                                                                                                                                                                                                                                                                                                                                                                                                                                                                                                                                                                                                                                                                                                                                                                                                                                                                                                                                                                                                                                                                                                                                                                                                                                                                                                                                                                                                                                                                                                                                                                                                                                                                                                                                                                                                                                                                                                                                                                                                                                                                                                                                                                                                                                                                                                                                                                                                                                                                                                                                                                                                                                                                                                                                                                                                                                                                                                                                                                                                                                                                                                                                                                                                                                                                                                                                                                                                                                                                                                                                                                                 |           | Lighthouse Lab in Glasgow       | Wellcome Sanger Institute for the COVID-19 Genomics UK (COG-UK) Consortium | Harper VanSteenhouse, Yumi Kasai, David Gray, Carol Clugston, Anna Dominiczak and Alex Alderton, Roberto Amato, Sonia Goncalves, Ewan Harrison, David K. Jackson, Ian Johnston, Dominic Kwiatkowski, Cordelia Langford, John Sillitoe on behalf of the Wellcome Sanger Institute COVID-19 Surveillance Team |
| EPI_ISL_991422                                                                                                                                                                                                                                                                                                                                                                                                                                                                                                                                                                                                                                                                                                                                                                                                                                                                                                                                                                                                                                                                                                                                                                                                                                                                                                                                                                                                                                                                                                                                                                                                                                                                                                                                                                                                                                                                                                                                                                                                                                                                                                                                                                                                                                                                                                                                                                                                                                                                                                                                                                                                                                                                                                                                                                                                                                                                                                                                                                                                                                                                                                                                                                                                                                                                                                                                                                                                                                                                                                                                                                                                                                                                                                                                                                                                                                                                                                                                                                                                                                                                                                                                                                                                                                                                                                                                                                                                                                                                                                                                                                                                                                                                                                                                                                                                                                                                 |           | Lighthouse Lab in Milton Keynes | Wellcome Sanger Institute for the COVID-19 Genomics UK (COG-UK) Consortium | The Lighthouse Lab in Milton Keynes and Alex Alderton, Roberto Amato, Sonia Goncalves, Ewan Harrison, David K. Jackson, Ian Johnston, Dominic Kwiatkowski, Cordelia Langford, John Sillitoe on behalf of the Wellcome Sanger Institute COVID-19 Surveillance Team                                           |
| EPI_ISL_991423, EPI_ISL_991425, EPI_ISL_991430                                                                                                                                                                                                                                                                                                                                                                                                                                                                                                                                                                                                                                                                                                                                                                                                                                                                                                                                                                                                                                                                                                                                                                                                                                                                                                                                                                                                                                                                                                                                                                                                                                                                                                                                                                                                                                                                                                                                                                                                                                                                                                                                                                                                                                                                                                                                                                                                                                                                                                                                                                                                                                                                                                                                                                                                                                                                                                                                                                                                                                                                                                                                                                                                                                                                                                                                                                                                                                                                                                                                                                                                                                                                                                                                                                                                                                                                                                                                                                                                                                                                                                                                                                                                                                                                                                                                                                                                                                                                                                                                                                                                                                                                                                                                                                                                                                 |           | Lighthouse Lab in Glasgow       | Wellcome Sanger Institute for the COVID-19 Genomics UK (COG-UK) Consortium | Harper VanSteenhouse, Yumi Kasai, David Gray, Carol Clugston, Anna Dominiczak and Alex Alderton, Roberto Amato, Sonia Goncalves, Ewan Harrison, David K. Jackson, Ian Johnston, Dominic Kwiatkowski, Cordelia Langford, John Sillitoe on behalf of the Wellcome Sanger Institute COVID-19 Surveillance Team |



[illegible]



[illegible]

[illegible]



[illegible]

[illegible]

[illegible]

[illegible]

[illegible]

[illegible]

[illegible]

[illegible]



[illegible]

[illegible]

|                                                                                                                                                                                                                                                                                                                                                                                                                                                                                                                                                                                                                                                                                                                                                                                                                                                                                                                                |                                 |                                                                                          | Team                                                                                                                                                                                                                                                                                                        |
|--------------------------------------------------------------------------------------------------------------------------------------------------------------------------------------------------------------------------------------------------------------------------------------------------------------------------------------------------------------------------------------------------------------------------------------------------------------------------------------------------------------------------------------------------------------------------------------------------------------------------------------------------------------------------------------------------------------------------------------------------------------------------------------------------------------------------------------------------------------------------------------------------------------------------------|---------------------------------|------------------------------------------------------------------------------------------|-------------------------------------------------------------------------------------------------------------------------------------------------------------------------------------------------------------------------------------------------------------------------------------------------------------|
| EPI_ISL_994513, EPI_ISL_994515                                                                                                                                                                                                                                                                                                                                                                                                                                                                                                                                                                                                                                                                                                                                                                                                                                                                                                 | Lighthouse Lab in Alderley Park | Wellcome Sanger Institute for the COVID-19 Genomics UK (COG-UK) Consortium               | Jacquelyn Wynn, Mairead Hyland, The Lighthouse Lab in Alderley Park and Alex Alderton, Roberto Amato, Sonia Goncalves, Ewan Harrison, David K. Jackson, Ian Johnston, Dominic Kwiatkowski, Cordelia Langford, John Sillitoe on behalf of the Wellcome Sanger Institute COVID-19 Surveillance Team           |
| EPI_ISL_994518                                                                                                                                                                                                                                                                                                                                                                                                                                                                                                                                                                                                                                                                                                                                                                                                                                                                                                                 | Lighthouse Lab in Glasgow       | Wellcome Sanger Institute for the COVID-19 Genomics UK (COG-UK) Consortium               | Harper VanSteenhouse, Yumi Kasai, David Gray, Carol Clugston, Anna Dominiczak and Alex Alderton, Roberto Amato, Sonia Goncalves, Ewan Harrison, David K. Jackson, Ian Johnston, Dominic Kwiatkowski, Cordelia Langford, John Sillitoe on behalf of the Wellcome Sanger Institute COVID-19 Surveillance Team |
| EPI_ISL_994519, EPI_ISL_994520, EPI_ISL_994522                                                                                                                                                                                                                                                                                                                                                                                                                                                                                                                                                                                                                                                                                                                                                                                                                                                                                 | Lighthouse Lab in Alderley Park | Wellcome Sanger Institute for the COVID-19 Genomics UK (COG-UK) Consortium               | Jacquelyn Wynn, Mairead Hyland, The Lighthouse Lab in Alderley Park and Alex Alderton, Roberto Amato, Sonia Goncalves, Ewan Harrison, David K. Jackson, Ian Johnston, Dominic Kwiatkowski, Cordelia Langford, John Sillitoe on behalf of the Wellcome Sanger Institute COVID-19 Surveillance Team           |
| EPI_ISL_994528                                                                                                                                                                                                                                                                                                                                                                                                                                                                                                                                                                                                                                                                                                                                                                                                                                                                                                                 | Lighthouse Lab in Glasgow       | Wellcome Sanger Institute for the COVID-19 Genomics UK (COG-UK) Consortium               | Harper VanSteenhouse, Yumi Kasai, David Gray, Carol Clugston, Anna Dominiczak and Alex Alderton, Roberto Amato, Sonia Goncalves, Ewan Harrison, David K. Jackson, Ian Johnston, Dominic Kwiatkowski, Cordelia Langford, John Sillitoe on behalf of the Wellcome Sanger Institute COVID-19 Surveillance Team |
| EPI_ISL_994536                                                                                                                                                                                                                                                                                                                                                                                                                                                                                                                                                                                                                                                                                                                                                                                                                                                                                                                 | Lighthouse Lab in Cambridge     | Wellcome Sanger Institute for the COVID-19 Genomics UK (COG-UK) Consortium               | Rob Howes, The Lighthouse Lab in Cambridge and Alex Alderton, Roberto Amato, Sonia Goncalves, Ewan Harrison, David K. Jackson, Ian Johnston, Dominic Kwiatkowski, Cordelia Langford, John Sillitoe on behalf of the Wellcome Sanger Institute COVID-19 Surveillance Team                                    |
| EPI_ISL_994539, EPI_ISL_994540                                                                                                                                                                                                                                                                                                                                                                                                                                                                                                                                                                                                                                                                                                                                                                                                                                                                                                 | Lighthouse Lab in Alderley Park | Wellcome Sanger Institute for the COVID-19 Genomics UK (COG-UK) Consortium               | Jacquelyn Wynn, Mairead Hyland, The Lighthouse Lab in Alderley Park and Alex Alderton, Roberto Amato, Sonia Goncalves, Ewan Harrison, David K. Jackson, Ian Johnston, Dominic Kwiatkowski, Cordelia Langford, John Sillitoe on behalf of the Wellcome Sanger Institute COVID-19 Surveillance Team           |
| EPI_ISL_994542                                                                                                                                                                                                                                                                                                                                                                                                                                                                                                                                                                                                                                                                                                                                                                                                                                                                                                                 | Lighthouse Lab in Glasgow       | Wellcome Sanger Institute for the COVID-19 Genomics UK (COG-UK) Consortium               | Harper VanSteenhouse, Yumi Kasai, David Gray, Carol Clugston, Anna Dominiczak and Alex Alderton, Roberto Amato, Sonia Goncalves, Ewan Harrison, David K. Jackson, Ian Johnston, Dominic Kwiatkowski, Cordelia Langford, John Sillitoe on behalf of the Wellcome Sanger Institute COVID-19 Surveillance Team |
| EPI_ISL_994544                                                                                                                                                                                                                                                                                                                                                                                                                                                                                                                                                                                                                                                                                                                                                                                                                                                                                                                 | Lighthouse Lab in Cambridge     | Wellcome Sanger Institute for the COVID-19 Genomics UK (COG-UK) Consortium               | Rob Howes, The Lighthouse Lab in Cambridge and Alex Alderton, Roberto Amato, Sonia Goncalves, Ewan Harrison, David K. Jackson, Ian Johnston, Dominic Kwiatkowski, Cordelia Langford, John Sillitoe on behalf of the Wellcome Sanger Institute COVID-19 Surveillance Team                                    |
| EPI_ISL_994545                                                                                                                                                                                                                                                                                                                                                                                                                                                                                                                                                                                                                                                                                                                                                                                                                                                                                                                 | Lighthouse Lab in Alderley Park | Wellcome Sanger Institute for the COVID-19 Genomics UK (COG-UK) Consortium               | Jacquelyn Wynn, Mairead Hyland, The Lighthouse Lab in Alderley Park and Alex Alderton, Roberto Amato, Sonia Goncalves, Ewan Harrison, David K. Jackson, Ian Johnston, Dominic Kwiatkowski, Cordelia Langford, John Sillitoe on behalf of the Wellcome Sanger Institute COVID-19 Surveillance Team           |
| EPI_ISL_994546                                                                                                                                                                                                                                                                                                                                                                                                                                                                                                                                                                                                                                                                                                                                                                                                                                                                                                                 | Lighthouse Lab in Glasgow       | Wellcome Sanger Institute for the COVID-19 Genomics UK (COG-UK) Consortium               | Harper VanSteenhouse, Yumi Kasai, David Gray, Carol Clugston, Anna Dominiczak and Alex Alderton, Roberto Amato, Sonia Goncalves, Ewan Harrison, David K. Jackson, Ian Johnston, Dominic Kwiatkowski, Cordelia Langford, John Sillitoe on behalf of the Wellcome Sanger Institute COVID-19 Surveillance Team |
| EPI_ISL_994548, EPI_ISL_994550, EPI_ISL_994553, EPI_ISL_994559, EPI_ISL_994568, EPI_ISL_994570, EPI_ISL_994572, EPI_ISL_994574, EPI_ISL_994575, EPI_ISL_994580, EPI_ISL_994581, EPI_ISL_994586, EPI_ISL_994589, EPI_ISL_994590, EPI_ISL_994593, EPI_ISL_994595, EPI_ISL_994596, EPI_ISL_994600, EPI_ISL_994607                                                                                                                                                                                                                                                                                                                                                                                                                                                                                                                                                                                                                 |                                 |                                                                                          |                                                                                                                                                                                                                                                                                                             |
| see above                                                                                                                                                                                                                                                                                                                                                                                                                                                                                                                                                                                                                                                                                                                                                                                                                                                                                                                      | Lighthouse Lab in Alderley Park | Wellcome Sanger Institute for the COVID-19 Genomics UK (COG-UK) Consortium               | Jacquelyn Wynn, Mairead Hyland, The Lighthouse Lab in Alderley Park and Alex Alderton, Roberto Amato, Sonia Goncalves, Ewan Harrison, David K. Jackson, Ian Johnston, Dominic Kwiatkowski, Cordelia Langford, John Sillitoe on behalf of the Wellcome Sanger Institute COVID-19 Surveillance Team           |
| EPI_ISL_994610                                                                                                                                                                                                                                                                                                                                                                                                                                                                                                                                                                                                                                                                                                                                                                                                                                                                                                                 | Lighthouse Lab in Cambridge     | Wellcome Sanger Institute for the COVID-19 Genomics UK (COG-UK) Consortium               | Rob Howes, The Lighthouse Lab in Cambridge and Alex Alderton, Roberto Amato, Sonia Goncalves, Ewan Harrison, David K. Jackson, Ian Johnston, Dominic Kwiatkowski, Cordelia Langford, John Sillitoe on behalf of the Wellcome Sanger Institute COVID-19 Surveillance Team                                    |
| EPI_ISL_994615, EPI_ISL_994619, EPI_ISL_994620, EPI_ISL_994622, EPI_ISL_994624, EPI_ISL_994626, EPI_ISL_994630, EPI_ISL_994633, EPI_ISL_994634, EPI_ISL_994635, EPI_ISL_994637, EPI_ISL_994643, EPI_ISL_994647, EPI_ISL_994650, EPI_ISL_994651                                                                                                                                                                                                                                                                                                                                                                                                                                                                                                                                                                                                                                                                                 |                                 |                                                                                          |                                                                                                                                                                                                                                                                                                             |
| see above                                                                                                                                                                                                                                                                                                                                                                                                                                                                                                                                                                                                                                                                                                                                                                                                                                                                                                                      | Lighthouse Lab in Alderley Park | Wellcome Sanger Institute for the COVID-19 Genomics UK (COG-UK) Consortium               | Jacquelyn Wynn, Mairead Hyland, The Lighthouse Lab in Alderley Park and Alex Alderton, Roberto Amato, Sonia Goncalves, Ewan Harrison, David K. Jackson, Ian Johnston, Dominic Kwiatkowski, Cordelia Langford, John Sillitoe on behalf of the Wellcome Sanger Institute COVID-19 Surveillance Team           |
| EPI_ISL_994652                                                                                                                                                                                                                                                                                                                                                                                                                                                                                                                                                                                                                                                                                                                                                                                                                                                                                                                 | Lighthouse Lab in Milton Keynes | Wellcome Sanger Institute for the COVID-19 Genomics UK (COG-UK) Consortium               | The Lighthouse Lab in Milton Keynes and Alex Alderton, Roberto Amato, Sonia Goncalves, Ewan Harrison, David K. Jackson, Ian Johnston, Dominic Kwiatkowski, Cordelia Langford, John Sillitoe on behalf of the Wellcome Sanger Institute COVID-19 Surveillance Team                                           |
| EPI_ISL_994802, EPI_ISL_994803, EPI_ISL_994804, EPI_ISL_994805, EPI_ISL_994806, EPI_ISL_994807, EPI_ISL_994808, EPI_ISL_994810, EPI_ISL_994811, EPI_ISL_994812, EPI_ISL_994816, EPI_ISL_994817, EPI_ISL_994818, EPI_ISL_994819, EPI_ISL_994821, EPI_ISL_994822, EPI_ISL_994823, EPI_ISL_994824, EPI_ISL_994825, EPI_ISL_994827, EPI_ISL_994828, EPI_ISL_994829, EPI_ISL_994830, EPI_ISL_994831, EPI_ISL_994833, EPI_ISL_994834, EPI_ISL_994835, EPI_ISL_994836, EPI_ISL_994837, EPI_ISL_994838, EPI_ISL_994839, EPI_ISL_994842, EPI_ISL_994843, EPI_ISL_994845, EPI_ISL_994847, EPI_ISL_994848, EPI_ISL_994849, EPI_ISL_994852, EPI_ISL_994853, EPI_ISL_994854, EPI_ISL_994858, EPI_ISL_994859, EPI_ISL_994861, EPI_ISL_994862, EPI_ISL_994865, EPI_ISL_994869                                                                                                                                                                 |                                 |                                                                                          |                                                                                                                                                                                                                                                                                                             |
| see above                                                                                                                                                                                                                                                                                                                                                                                                                                                                                                                                                                                                                                                                                                                                                                                                                                                                                                                      | Pandemic Response Lab - NYC     | Pandemic Response Lab, R&D                                                               | Henry Lee, Michael Hammerling, Melissa Hopkins, Cybill del Castillo, William Ward, Pradeep Bugga, Haiping Hao, Jon Laurent                                                                                                                                                                                  |
| EPI_ISL_995331, EPI_ISL_995332, EPI_ISL_995336, EPI_ISL_995338, EPI_ISL_995340, EPI_ISL_995341, EPI_ISL_995342, EPI_ISL_995345, EPI_ISL_995347, EPI_ISL_995350, EPI_ISL_995351, EPI_ISL_995353, EPI_ISL_995356, EPI_ISL_995357, EPI_ISL_995358, EPI_ISL_995360, EPI_ISL_995363, EPI_ISL_995365, EPI_ISL_995368, EPI_ISL_995371, EPI_ISL_995372, EPI_ISL_995373, EPI_ISL_995378, EPI_ISL_995380, EPI_ISL_995381, EPI_ISL_995383, EPI_ISL_995384, EPI_ISL_995387, EPI_ISL_995388, EPI_ISL_995393, EPI_ISL_995394, EPI_ISL_995405, EPI_ISL_995407, EPI_ISL_995410, EPI_ISL_995411, EPI_ISL_995414, EPI_ISL_995418, EPI_ISL_995419, EPI_ISL_995421, EPI_ISL_995422, EPI_ISL_995425, EPI_ISL_995427, EPI_ISL_995439, EPI_ISL_995440                                                                                                                                                                                                 |                                 |                                                                                          |                                                                                                                                                                                                                                                                                                             |
| see above                                                                                                                                                                                                                                                                                                                                                                                                                                                                                                                                                                                                                                                                                                                                                                                                                                                                                                                      | Outre mer                       | National Reference Center for Viruses of Respiratory Infections, Institut Pasteur, Paris | Marion Barbet, Sylvie Behillil, Méline Bizard, Angela Brisebarre, Camille Capel, Etienne Simon-Lorière, Vincent Enouf, Maud Vanpeene, Sylvie van der Werf,Combe Patrice                                                                                                                                     |
| EPI_ISL_995449                                                                                                                                                                                                                                                                                                                                                                                                                                                                                                                                                                                                                                                                                                                                                                                                                                                                                                                 | Hopital                         | National Reference Center for Viruses of Respiratory Infections, Institut Pasteur, Paris | Marion Barbet, Sylvie Behillil, Méline Bizard, Angela Brisebarre, Camille Capel, Etienne Simon-Lorière, Vincent Enouf, Maud Vanpeene, Sylvie van der Werf,Marque Juliet StéPhanie                                                                                                                           |
| EPI_ISL_995451, EPI_ISL_995453, EPI_ISL_995454, EPI_ISL_995456, EPI_ISL_995457, EPI_ISL_995458, EPI_ISL_995459, EPI_ISL_995460                                                                                                                                                                                                                                                                                                                                                                                                                                                                                                                                                                                                                                                                                                                                                                                                 | Hopital                         | National Reference Center for Viruses of Respiratory Infections, Institut Pasteur, Paris | Marion Barbet, Sylvie Behillil, Méline Bizard, Angela Brisebarre, Camille Capel, Etienne Simon-Lorière, Vincent Enouf, Maud Vanpeene, Sylvie van der Werf,Fourgeaud Jacques                                                                                                                                 |
| EPI_ISL_995463, EPI_ISL_995465, EPI_ISL_995466                                                                                                                                                                                                                                                                                                                                                                                                                                                                                                                                                                                                                                                                                                                                                                                                                                                                                 | Hopital                         | National Reference Center for Viruses of Respiratory Infections, Institut Pasteur, Paris | Marion Barbet, Sylvie Behillil, Méline Bizard, Angela Brisebarre, Camille Capel, Etienne Simon-Lorière, Vincent Enouf, Maud Vanpeene, Sylvie van der Werf,Guinoiseau Thibault                                                                                                                               |
| EPI_ISL_995469                                                                                                                                                                                                                                                                                                                                                                                                                                                                                                                                                                                                                                                                                                                                                                                                                                                                                                                 | Labo Analyses Med               | National Reference Center for Viruses of Respiratory Infections, Institut Pasteur, Paris | Marion Barbet, Sylvie Behillil, Méline Bizard, Angela Brisebarre, Camille Capel, Etienne Simon-Lorière, Vincent Enouf, Maud Vanpeene, Sylvie van der Werf,Garand Anne-Laure                                                                                                                                 |
| EPI_ISL_995471                                                                                                                                                                                                                                                                                                                                                                                                                                                                                                                                                                                                                                                                                                                                                                                                                                                                                                                 | Hopital                         | National Reference Center for Viruses of Respiratory Infections, Institut Pasteur, Paris | Marion Barbet, Sylvie Behillil, Méline Bizard, Angela Brisebarre, Camille Capel, Etienne Simon-Lorière, Vincent Enouf, Maud Vanpeene, Sylvie van der Werf,Merens Audrey                                                                                                                                     |
| EPI_ISL_995473                                                                                                                                                                                                                                                                                                                                                                                                                                                                                                                                                                                                                                                                                                                                                                                                                                                                                                                 | Recherche                       | National Reference Center for Viruses of Respiratory Infections, Institut Pasteur, Paris | Marion Barbet, Sylvie Behillil, Méline Bizard, Angela Brisebarre, Camille Capel, Etienne Simon-Lorière, Vincent Enouf, Maud Vanpeene, Sylvie van der Werf,Leruez-Ville Marianne                                                                                                                             |
| EPI_ISL_995474, EPI_ISL_995476, EPI_ISL_995479, EPI_ISL_995480, EPI_ISL_995481, EPI_ISL_995482, EPI_ISL_995483, EPI_ISL_995484, EPI_ISL_995489, EPI_ISL_995490                                                                                                                                                                                                                                                                                                                                                                                                                                                                                                                                                                                                                                                                                                                                                                 | Hopital                         | National Reference Center for Viruses of Respiratory Infections, Institut Pasteur, Paris | Marion Barbet, Sylvie Behillil, Méline Bizard, Angela Brisebarre, Camille Capel, Etienne Simon-Lorière, Vincent Enouf, Maud Vanpeene, Sylvie van der Werf,Delamare Catherine                                                                                                                                |
| EPI_ISL_995491, EPI_ISL_995494                                                                                                                                                                                                                                                                                                                                                                                                                                                                                                                                                                                                                                                                                                                                                                                                                                                                                                 | Labo Analyses Med               | National Reference Center for Viruses of Respiratory Infections, Institut Pasteur, Paris | Marion Barbet, Sylvie Behillil, Méline Bizard, Angela Brisebarre, Camille Capel, Etienne Simon-Lorière, Vincent Enouf, Maud Vanpeene, Sylvie van der Werf,Delamare Catherine                                                                                                                                |
| EPI_ISL_995541, EPI_ISL_995542, EPI_ISL_995547                                                                                                                                                                                                                                                                                                                                                                                                                                                                                                                                                                                                                                                                                                                                                                                                                                                                                 | Jessa                           | Jessa                                                                                    | Jessa_cmdLab                                                                                                                                                                                                                                                                                                |
| EPI_ISL_995557, EPI_ISL_995558, EPI_ISL_995559, EPI_ISL_995560, EPI_ISL_995561, EPI_ISL_995562, EPI_ISL_995563, EPI_ISL_995566, EPI_ISL_995567, EPI_ISL_995568, EPI_ISL_995602, EPI_ISL_995603, EPI_ISL_995614, EPI_ISL_995615, EPI_ISL_995616, EPI_ISL_995617, EPI_ISL_995618, EPI_ISL_995619, EPI_ISL_995620, EPI_ISL_995621, EPI_ISL_995622, EPI_ISL_995651, EPI_ISL_995652, EPI_ISL_995653, EPI_ISL_995654, EPI_ISL_995655, EPI_ISL_995656, EPI_ISL_995657, EPI_ISL_995658, EPI_ISL_995659, EPI_ISL_995660, EPI_ISL_995661, EPI_ISL_995662, EPI_ISL_995664, EPI_ISL_995667, EPI_ISL_995668, EPI_ISL_995669, EPI_ISL_995670, EPI_ISL_995671, EPI_ISL_995672, EPI_ISL_995673, EPI_ISL_995674, EPI_ISL_995675, EPI_ISL_995676, EPI_ISL_995678, EPI_ISL_995679, EPI_ISL_995680, EPI_ISL_995681, EPI_ISL_995684, EPI_ISL_995685, EPI_ISL_995686, EPI_ISL_995687, EPI_ISL_995688, EPI_ISL_995689, EPI_ISL_995690, EPI_ISL_995691 |                                 |                                                                                          |                                                                                                                                                                                                                                                                                                             |

|                                                                                                                                                                                                                                                                                                                                                                                                                                                                                                                                                                                                                                                                                                                                                                                                                                                                                                                                                                                                                                                                                                                                                                                                                                                                                                                                                                                                                                                                                                                                                                                                                                                                                                                                                                                                                                                                                                                                                                                                                                                                                                                                                                                                                                                                                                                                                                                                                                                                                                                                                                                                                                                                                                                |                                                                                                                                                                        |                                                                                                                                        |                                                                                                                                                                                                                                                                                                                                                                                                                                         |
|----------------------------------------------------------------------------------------------------------------------------------------------------------------------------------------------------------------------------------------------------------------------------------------------------------------------------------------------------------------------------------------------------------------------------------------------------------------------------------------------------------------------------------------------------------------------------------------------------------------------------------------------------------------------------------------------------------------------------------------------------------------------------------------------------------------------------------------------------------------------------------------------------------------------------------------------------------------------------------------------------------------------------------------------------------------------------------------------------------------------------------------------------------------------------------------------------------------------------------------------------------------------------------------------------------------------------------------------------------------------------------------------------------------------------------------------------------------------------------------------------------------------------------------------------------------------------------------------------------------------------------------------------------------------------------------------------------------------------------------------------------------------------------------------------------------------------------------------------------------------------------------------------------------------------------------------------------------------------------------------------------------------------------------------------------------------------------------------------------------------------------------------------------------------------------------------------------------------------------------------------------------------------------------------------------------------------------------------------------------------------------------------------------------------------------------------------------------------------------------------------------------------------------------------------------------------------------------------------------------------------------------------------------------------------------------------------------------|------------------------------------------------------------------------------------------------------------------------------------------------------------------------|----------------------------------------------------------------------------------------------------------------------------------------|-----------------------------------------------------------------------------------------------------------------------------------------------------------------------------------------------------------------------------------------------------------------------------------------------------------------------------------------------------------------------------------------------------------------------------------------|
| see above                                                                                                                                                                                                                                                                                                                                                                                                                                                                                                                                                                                                                                                                                                                                                                                                                                                                                                                                                                                                                                                                                                                                                                                                                                                                                                                                                                                                                                                                                                                                                                                                                                                                                                                                                                                                                                                                                                                                                                                                                                                                                                                                                                                                                                                                                                                                                                                                                                                                                                                                                                                                                                                                                                      | KU Leuven, Rega Institute, Clinical and Epidemiological Virology                                                                                                       | KU Leuven, Rega Institute, Clinical and Epidemiological Virology                                                                       | Tony Wawina-Bokalanga, Bert Vanmechelen, Joan Marti-Carerras, Piet Maes                                                                                                                                                                                                                                                                                                                                                                 |
| EPI_ISL_995711                                                                                                                                                                                                                                                                                                                                                                                                                                                                                                                                                                                                                                                                                                                                                                                                                                                                                                                                                                                                                                                                                                                                                                                                                                                                                                                                                                                                                                                                                                                                                                                                                                                                                                                                                                                                                                                                                                                                                                                                                                                                                                                                                                                                                                                                                                                                                                                                                                                                                                                                                                                                                                                                                                 | BANGALORE MEDICAL COLLEGE AND RESEARCH INSTITUTE                                                                                                                       | Department of Neurovirology, National Institute of Mental Health and Neurosciences (NIMHANS)                                           | Chitra Pattabiraman, Pramada Prasad, Anson Kunjumon George, Risha Rasheed, Darshan Sreenivas, Nakka Vijay Kiran Reddy, Anita S Desai, V Ravi                                                                                                                                                                                                                                                                                            |
| EPI_ISL_995723                                                                                                                                                                                                                                                                                                                                                                                                                                                                                                                                                                                                                                                                                                                                                                                                                                                                                                                                                                                                                                                                                                                                                                                                                                                                                                                                                                                                                                                                                                                                                                                                                                                                                                                                                                                                                                                                                                                                                                                                                                                                                                                                                                                                                                                                                                                                                                                                                                                                                                                                                                                                                                                                                                 | RAILWAY HOSPITAL                                                                                                                                                       | Department of Neurovirology, National Institute of Mental Health and Neurosciences (NIMHANS)                                           | Chitra Pattabiraman, Pramada Prasad, Anson Kunjumon George, Risha Rasheed, Darshan Sreenivas, Nakka Vijay Kiran Reddy, Anita S Desai, V Ravi                                                                                                                                                                                                                                                                                            |
| EPI_ISL_995725, EPI_ISL_995736                                                                                                                                                                                                                                                                                                                                                                                                                                                                                                                                                                                                                                                                                                                                                                                                                                                                                                                                                                                                                                                                                                                                                                                                                                                                                                                                                                                                                                                                                                                                                                                                                                                                                                                                                                                                                                                                                                                                                                                                                                                                                                                                                                                                                                                                                                                                                                                                                                                                                                                                                                                                                                                                                 | BBMP Urban PHC                                                                                                                                                         | Department of Neurovirology, National Institute of Mental Health and Neurosciences (NIMHANS)                                           | Chitra Pattabiraman, Pramada Prasad, Anson Kunjumon George, Harsha.P.K, Risha Rasheed, Darshan Sreenivas, Nakka Vijay Kiran Reddy, Anita S Desai, V Ravi                                                                                                                                                                                                                                                                                |
| EPI_ISL_995743                                                                                                                                                                                                                                                                                                                                                                                                                                                                                                                                                                                                                                                                                                                                                                                                                                                                                                                                                                                                                                                                                                                                                                                                                                                                                                                                                                                                                                                                                                                                                                                                                                                                                                                                                                                                                                                                                                                                                                                                                                                                                                                                                                                                                                                                                                                                                                                                                                                                                                                                                                                                                                                                                                 | Jayanagar General Hospital                                                                                                                                             | Department of Neurovirology, National Institute of Mental Health and Neurosciences (NIMHANS)                                           | Chitra Pattabiraman, Pramada Prasad, Anson Kunjumon George, Harsha.P.K, Risha Rasheed, Darshan Sreenivas, Nakka Vijay Kiran Reddy, Anita S Desai, V Ravi                                                                                                                                                                                                                                                                                |
| EPI_ISL_995750                                                                                                                                                                                                                                                                                                                                                                                                                                                                                                                                                                                                                                                                                                                                                                                                                                                                                                                                                                                                                                                                                                                                                                                                                                                                                                                                                                                                                                                                                                                                                                                                                                                                                                                                                                                                                                                                                                                                                                                                                                                                                                                                                                                                                                                                                                                                                                                                                                                                                                                                                                                                                                                                                                 | BBMP Urban PHC                                                                                                                                                         | Department of Neurovirology, National Institute of Mental Health and Neurosciences (NIMHANS)                                           | Chitra Pattabiraman, Pramada Prasad, Anson Kunjumon George, Harsha.P.K, Risha Rasheed, Darshan Sreenivas, Nakka Vijay Kiran Reddy, Anita S Desai, V Ravi                                                                                                                                                                                                                                                                                |
| EPI_ISL_995765, EPI_ISL_995766, EPI_ISL_995771, EPI_ISL_995778, EPI_ISL_995779, EPI_ISL_995781, EPI_ISL_995784, EPI_ISL_995785, EPI_ISL_995788, EPI_ISL_995794, EPI_ISL_995808, EPI_ISL_995812, EPI_ISL_995815, EPI_ISL_995821, EPI_ISL_995824, EPI_ISL_995827                                                                                                                                                                                                                                                                                                                                                                                                                                                                                                                                                                                                                                                                                                                                                                                                                                                                                                                                                                                                                                                                                                                                                                                                                                                                                                                                                                                                                                                                                                                                                                                                                                                                                                                                                                                                                                                                                                                                                                                                                                                                                                                                                                                                                                                                                                                                                                                                                                                 |                                                                                                                                                                        |                                                                                                                                        |                                                                                                                                                                                                                                                                                                                                                                                                                                         |
| see above                                                                                                                                                                                                                                                                                                                                                                                                                                                                                                                                                                                                                                                                                                                                                                                                                                                                                                                                                                                                                                                                                                                                                                                                                                                                                                                                                                                                                                                                                                                                                                                                                                                                                                                                                                                                                                                                                                                                                                                                                                                                                                                                                                                                                                                                                                                                                                                                                                                                                                                                                                                                                                                                                                      | Division of Emerging Infectious Diseases, Bureau of Infectious Diseases Diagnosis Control, Korea Disease Control and Prevention Agency                                 | Division of Emerging Infectious Diseases, Bureau of Infectious Diseases Diagnosis Control, Korea Disease Control and Prevention Agency | Ae Kyung Park, Il-Hwan Kim, Heui Man Kim, Jeong-Min Kim, Namjoo Lee, Chae Young Lee, Sang Hee Woo, Eun-Jin Kim                                                                                                                                                                                                                                                                                                                          |
| EPI_ISL_995839, EPI_ISL_995840, EPI_ISL_995841, EPI_ISL_995842, EPI_ISL_995843, EPI_ISL_995844, EPI_ISL_995845, EPI_ISL_995846, EPI_ISL_995847, EPI_ISL_995848, EPI_ISL_995849, EPI_ISL_995850, EPI_ISL_995851, EPI_ISL_995852, EPI_ISL_995853, EPI_ISL_995854, EPI_ISL_995855, EPI_ISL_995856, EPI_ISL_995857, EPI_ISL_995858, EPI_ISL_995859, EPI_ISL_995860, EPI_ISL_995861, EPI_ISL_995862, EPI_ISL_995863, EPI_ISL_995864, EPI_ISL_995865, EPI_ISL_995866, EPI_ISL_995867, EPI_ISL_995868, EPI_ISL_995869, EPI_ISL_995870, EPI_ISL_995871, EPI_ISL_995872, EPI_ISL_995873, EPI_ISL_995874, EPI_ISL_995878, EPI_ISL_995879, EPI_ISL_995880, EPI_ISL_995881, EPI_ISL_995884, EPI_ISL_995885, EPI_ISL_995886, EPI_ISL_995887, EPI_ISL_995888, EPI_ISL_995889, EPI_ISL_995890, EPI_ISL_995891, EPI_ISL_995892, EPI_ISL_995893, EPI_ISL_995894, EPI_ISL_995895, EPI_ISL_995896, EPI_ISL_995897, EPI_ISL_995899, EPI_ISL_995900, EPI_ISL_995901, EPI_ISL_995902, EPI_ISL_995903, EPI_ISL_995904, EPI_ISL_995906, EPI_ISL_995907, EPI_ISL_995908, EPI_ISL_995909, EPI_ISL_995910, EPI_ISL_995911, EPI_ISL_995912, EPI_ISL_995913, EPI_ISL_995914, EPI_ISL_995915, EPI_ISL_995916, EPI_ISL_995917, EPI_ISL_995918, EPI_ISL_995919, EPI_ISL_995920, EPI_ISL_995921, EPI_ISL_995922, EPI_ISL_995923, EPI_ISL_995924, EPI_ISL_995925, EPI_ISL_995926, EPI_ISL_995927, EPI_ISL_995928, EPI_ISL_995929, EPI_ISL_995930, EPI_ISL_995932, EPI_ISL_995933, EPI_ISL_995934, EPI_ISL_995935, EPI_ISL_995936, EPI_ISL_995937, EPI_ISL_995938, EPI_ISL_995940, EPI_ISL_995941, EPI_ISL_995942, EPI_ISL_995943, EPI_ISL_995944, EPI_ISL_995945, EPI_ISL_995946, EPI_ISL_995947, EPI_ISL_995949, EPI_ISL_995950, EPI_ISL_995951, EPI_ISL_995952, EPI_ISL_995953, EPI_ISL_995954, EPI_ISL_995955, EPI_ISL_995957, EPI_ISL_995958, EPI_ISL_995959, EPI_ISL_995961, EPI_ISL_995962, EPI_ISL_995963, EPI_ISL_995964, EPI_ISL_995965, EPI_ISL_995966, EPI_ISL_995967, EPI_ISL_995968, EPI_ISL_995969, EPI_ISL_995970, EPI_ISL_995972, EPI_ISL_995973, EPI_ISL_995974, EPI_ISL_995975, EPI_ISL_995976, EPI_ISL_995977, EPI_ISL_995978, EPI_ISL_995980, EPI_ISL_995982, EPI_ISL_995983, EPI_ISL_995984, EPI_ISL_995986, EPI_ISL_995987, EPI_ISL_995988, EPI_ISL_995989, EPI_ISL_995990, EPI_ISL_995991, EPI_ISL_995992, EPI_ISL_995993, EPI_ISL_995995, EPI_ISL_995996, EPI_ISL_995997, EPI_ISL_995998, EPI_ISL_996000, EPI_ISL_996001                                                                                                                                                                                                                                                                                                 |                                                                                                                                                                        |                                                                                                                                        |                                                                                                                                                                                                                                                                                                                                                                                                                                         |
| see above                                                                                                                                                                                                                                                                                                                                                                                                                                                                                                                                                                                                                                                                                                                                                                                                                                                                                                                                                                                                                                                                                                                                                                                                                                                                                                                                                                                                                                                                                                                                                                                                                                                                                                                                                                                                                                                                                                                                                                                                                                                                                                                                                                                                                                                                                                                                                                                                                                                                                                                                                                                                                                                                                                      | Department of Virology and Immunology, University of Helsinki and Helsinki University Hospital, Huslab Finland                                                         | Department of Virology, Faculty of Medicine, University of Helsinki, Helsinki, Finland                                                 | Teemu Smura, Ravi Kant, Phuoc Truong, Hussein Alburkat, Hannimari Kallio-Kokko, Jenni Virtanen, Maija Suvanto, Essi Korhonen, Sari Hannula, Harri Kangas, Hanna Liimatainen, Satu Kurkela, Hanna Jarva, Maija Lappalainen, Pekka Ellonen, Olli Vapalahti                                                                                                                                                                                |
| EPI_ISL_996031, EPI_ISL_996036, EPI_ISL_996040, EPI_ISL_996041, EPI_ISL_996043, EPI_ISL_996045, EPI_ISL_996048, EPI_ISL_996049, EPI_ISL_996050, EPI_ISL_996055, EPI_ISL_996059                                                                                                                                                                                                                                                                                                                                                                                                                                                                                                                                                                                                                                                                                                                                                                                                                                                                                                                                                                                                                                                                                                                                                                                                                                                                                                                                                                                                                                                                                                                                                                                                                                                                                                                                                                                                                                                                                                                                                                                                                                                                                                                                                                                                                                                                                                                                                                                                                                                                                                                                 |                                                                                                                                                                        |                                                                                                                                        |                                                                                                                                                                                                                                                                                                                                                                                                                                         |
| see above                                                                                                                                                                                                                                                                                                                                                                                                                                                                                                                                                                                                                                                                                                                                                                                                                                                                                                                                                                                                                                                                                                                                                                                                                                                                                                                                                                                                                                                                                                                                                                                                                                                                                                                                                                                                                                                                                                                                                                                                                                                                                                                                                                                                                                                                                                                                                                                                                                                                                                                                                                                                                                                                                                      | Centre for Dengue Research and AICBU, Department of Immunology and Molecular Medicine                                                                                  | Centre for Dengue Research and AICBU, Department of Immunology and Molecular Medicine                                                  | Chandima Jeewandara, Deshni Jayathilaka, Dinuka Ariyaratne, Tibutius Thanesh Pramanayagam, Diyanath Ranasinghe, Laksiri Gomes, Gathsaurie Neelika Malavige                                                                                                                                                                                                                                                                              |
| EPI_ISL_996069, EPI_ISL_996073                                                                                                                                                                                                                                                                                                                                                                                                                                                                                                                                                                                                                                                                                                                                                                                                                                                                                                                                                                                                                                                                                                                                                                                                                                                                                                                                                                                                                                                                                                                                                                                                                                                                                                                                                                                                                                                                                                                                                                                                                                                                                                                                                                                                                                                                                                                                                                                                                                                                                                                                                                                                                                                                                 | Department of Pathology, University of Cambridge                                                                                                                       | COVID-19 Genomics UK (COG-UK) Consortium                                                                                               | Aminu S. Jahun, Yasmin Chaudhry, Iliana Georgana, Myra Hosmillo, Rhys Izuagbe, William L. Hamilton, Martin D. Curran, Surendra Parmar, Ian Goodfellow                                                                                                                                                                                                                                                                                   |
| EPI_ISL_996399, EPI_ISL_996402, EPI_ISL_996405, EPI_ISL_996407, EPI_ISL_996408, EPI_ISL_996409, EPI_ISL_996412                                                                                                                                                                                                                                                                                                                                                                                                                                                                                                                                                                                                                                                                                                                                                                                                                                                                                                                                                                                                                                                                                                                                                                                                                                                                                                                                                                                                                                                                                                                                                                                                                                                                                                                                                                                                                                                                                                                                                                                                                                                                                                                                                                                                                                                                                                                                                                                                                                                                                                                                                                                                 | University of Birmingham                                                                                                                                               | COVID-19 Genomics UK (COG-UK) Consortium                                                                                               | Institute of Microbiology, University of Birmingham: Claire McMurray, Joanne Stockton, Samuel Nicholls, Radoslaw Poplawski, Will Rowe, Josh Quick, Nicholas Loman. University of Birmingham Testing Laboratory: Celina M Whalley, Andrew Bosworth, Charlotte Poxon, Kasun Wanigasooriya, Oliver Pickles, Mike Kidd, Alex Richter, Andrew D Beggs PHE Heartlands Lab: Husam Osman, Andrew Bosworth. Queen Elizabeth Hospital: Anna Casey |
| EPI_ISL_996417, EPI_ISL_996419                                                                                                                                                                                                                                                                                                                                                                                                                                                                                                                                                                                                                                                                                                                                                                                                                                                                                                                                                                                                                                                                                                                                                                                                                                                                                                                                                                                                                                                                                                                                                                                                                                                                                                                                                                                                                                                                                                                                                                                                                                                                                                                                                                                                                                                                                                                                                                                                                                                                                                                                                                                                                                                                                 | Bundeswehrkrankenhaus Hamburg                                                                                                                                          | Bundeswehr Institute of Microbiology                                                                                                   | Markus Antwerpen, Alexandra Rehn, Mathias Walter, Malena Bestehorn-Willmann, Mike Pillukat, Sabine Zange, Enrico Georgi, Roman Wölfel                                                                                                                                                                                                                                                                                                   |
| EPI_ISL_996423, EPI_ISL_996433, EPI_ISL_996434, EPI_ISL_996437, EPI_ISL_996442, EPI_ISL_996444, EPI_ISL_996447, EPI_ISL_996448, EPI_ISL_996450, EPI_ISL_996452, EPI_ISL_996453, EPI_ISL_996454, EPI_ISL_996455, EPI_ISL_996457, EPI_ISL_996461, EPI_ISL_996464, EPI_ISL_996465, EPI_ISL_996468, EPI_ISL_996469, EPI_ISL_996470, EPI_ISL_996472, EPI_ISL_996474                                                                                                                                                                                                                                                                                                                                                                                                                                                                                                                                                                                                                                                                                                                                                                                                                                                                                                                                                                                                                                                                                                                                                                                                                                                                                                                                                                                                                                                                                                                                                                                                                                                                                                                                                                                                                                                                                                                                                                                                                                                                                                                                                                                                                                                                                                                                                 |                                                                                                                                                                        |                                                                                                                                        |                                                                                                                                                                                                                                                                                                                                                                                                                                         |
| see above                                                                                                                                                                                                                                                                                                                                                                                                                                                                                                                                                                                                                                                                                                                                                                                                                                                                                                                                                                                                                                                                                                                                                                                                                                                                                                                                                                                                                                                                                                                                                                                                                                                                                                                                                                                                                                                                                                                                                                                                                                                                                                                                                                                                                                                                                                                                                                                                                                                                                                                                                                                                                                                                                                      | University of Birmingham                                                                                                                                               | COVID-19 Genomics UK (COG-UK) Consortium                                                                                               | Institute of Microbiology, University of Birmingham: Claire McMurray, Joanne Stockton, Samuel Nicholls, Radoslaw Poplawski, Will Rowe, Josh Quick, Nicholas Loman. University of Birmingham Testing Laboratory: Celina M Whalley, Andrew Bosworth, Charlotte Poxon, Kasun Wanigasooriya, Oliver Pickles, Mike Kidd, Alex Richter, Andrew D Beggs PHE Heartlands Lab: Husam Osman, Andrew Bosworth. Queen Elizabeth Hospital: Anna Casey |
| EPI_ISL_996486, EPI_ISL_996487, EPI_ISL_996500, EPI_ISL_996502, EPI_ISL_996504, EPI_ISL_996511, EPI_ISL_996514, EPI_ISL_996517, EPI_ISL_996519, EPI_ISL_996528, EPI_ISL_996529, EPI_ISL_996531, EPI_ISL_996533, EPI_ISL_996536, EPI_ISL_996537, EPI_ISL_996539, EPI_ISL_996544                                                                                                                                                                                                                                                                                                                                                                                                                                                                                                                                                                                                                                                                                                                                                                                                                                                                                                                                                                                                                                                                                                                                                                                                                                                                                                                                                                                                                                                                                                                                                                                                                                                                                                                                                                                                                                                                                                                                                                                                                                                                                                                                                                                                                                                                                                                                                                                                                                 |                                                                                                                                                                        |                                                                                                                                        |                                                                                                                                                                                                                                                                                                                                                                                                                                         |
| see above                                                                                                                                                                                                                                                                                                                                                                                                                                                                                                                                                                                                                                                                                                                                                                                                                                                                                                                                                                                                                                                                                                                                                                                                                                                                                                                                                                                                                                                                                                                                                                                                                                                                                                                                                                                                                                                                                                                                                                                                                                                                                                                                                                                                                                                                                                                                                                                                                                                                                                                                                                                                                                                                                                      | University of Exeter                                                                                                                                                   | COVID-19 Genomics UK (COG-UK) Consortium                                                                                               | Ben Temperton, Aaron Jeffries, Michelle Michelsen, Joanna Warwick-Dugdale, Audrey Farbos, Robyn Manley, Stephen Michell, Jane Masoli                                                                                                                                                                                                                                                                                                    |
| EPI_ISL_996599, EPI_ISL_996601, EPI_ISL_996602, EPI_ISL_996603, EPI_ISL_996606, EPI_ISL_996607, EPI_ISL_996610, EPI_ISL_996611, EPI_ISL_996612, EPI_ISL_996614, EPI_ISL_996615, EPI_ISL_996616, EPI_ISL_996619, EPI_ISL_996620, EPI_ISL_996622, EPI_ISL_996623, EPI_ISL_996626, EPI_ISL_996629, EPI_ISL_996632, EPI_ISL_996633, EPI_ISL_996634, EPI_ISL_996635, EPI_ISL_996644, EPI_ISL_996645, EPI_ISL_996652, EPI_ISL_996654, EPI_ISL_996657, EPI_ISL_996673, EPI_ISL_996675, EPI_ISL_996676, EPI_ISL_996677, EPI_ISL_996678, EPI_ISL_996679, EPI_ISL_996680, EPI_ISL_996682, EPI_ISL_996684, EPI_ISL_996686, EPI_ISL_996687, EPI_ISL_996688, EPI_ISL_996689, EPI_ISL_996691, EPI_ISL_996692, EPI_ISL_996693, EPI_ISL_996694, EPI_ISL_996695, EPI_ISL_996696, EPI_ISL_996697, EPI_ISL_996698, EPI_ISL_996699, EPI_ISL_996700, EPI_ISL_996701, EPI_ISL_996702, EPI_ISL_996703, EPI_ISL_996705, EPI_ISL_996706, EPI_ISL_996708, EPI_ISL_996710, EPI_ISL_996711, EPI_ISL_996712, EPI_ISL_996713, EPI_ISL_996715, EPI_ISL_996716, EPI_ISL_996717, EPI_ISL_996718, EPI_ISL_996720, EPI_ISL_996722, EPI_ISL_996727, EPI_ISL_996729, EPI_ISL_996733, EPI_ISL_996738, EPI_ISL_996865, EPI_ISL_996867, EPI_ISL_996868, EPI_ISL_996872, EPI_ISL_996876, EPI_ISL_996878, EPI_ISL_996879, EPI_ISL_996880, EPI_ISL_996882, EPI_ISL_996884, EPI_ISL_996886, EPI_ISL_996888, EPI_ISL_996891, EPI_ISL_996892, EPI_ISL_996894, EPI_ISL_996896, EPI_ISL_996903, EPI_ISL_996905, EPI_ISL_996906, EPI_ISL_996910, EPI_ISL_996911, EPI_ISL_996912, EPI_ISL_996913, EPI_ISL_996916, EPI_ISL_996919, EPI_ISL_996921, EPI_ISL_996922, EPI_ISL_996924, EPI_ISL_996926, EPI_ISL_996927, EPI_ISL_996928, EPI_ISL_996930, EPI_ISL_996931, EPI_ISL_996934, EPI_ISL_996935, EPI_ISL_996937, EPI_ISL_996940, EPI_ISL_996941, EPI_ISL_996944, EPI_ISL_996945, EPI_ISL_996950, EPI_ISL_996954, EPI_ISL_996960, EPI_ISL_996961, EPI_ISL_996962, EPI_ISL_996963, EPI_ISL_996965, EPI_ISL_996967, EPI_ISL_996969, EPI_ISL_996972, EPI_ISL_996974, EPI_ISL_996975, EPI_ISL_996977, EPI_ISL_996978, EPI_ISL_996980, EPI_ISL_996982, EPI_ISL_996984, EPI_ISL_996986, EPI_ISL_996988, EPI_ISL_996992, EPI_ISL_996993, EPI_ISL_996995, EPI_ISL_996996, EPI_ISL_996997, EPI_ISL_996998, EPI_ISL_996999, EPI_ISL_997001, EPI_ISL_997004, EPI_ISL_997006, EPI_ISL_997008, EPI_ISL_997009, EPI_ISL_997010, EPI_ISL_997011, EPI_ISL_997013, EPI_ISL_997014, EPI_ISL_997015, EPI_ISL_997016, EPI_ISL_997019, EPI_ISL_997020, EPI_ISL_997024, EPI_ISL_997027, EPI_ISL_997028, EPI_ISL_997032, EPI_ISL_997033, EPI_ISL_997035, EPI_ISL_997036, EPI_ISL_997039, EPI_ISL_997040, EPI_ISL_997041, EPI_ISL_997043, EPI_ISL_997045, EPI_ISL_997046, EPI_ISL_997049 |                                                                                                                                                                        |                                                                                                                                        |                                                                                                                                                                                                                                                                                                                                                                                                                                         |
| see above                                                                                                                                                                                                                                                                                                                                                                                                                                                                                                                                                                                                                                                                                                                                                                                                                                                                                                                                                                                                                                                                                                                                                                                                                                                                                                                                                                                                                                                                                                                                                                                                                                                                                                                                                                                                                                                                                                                                                                                                                                                                                                                                                                                                                                                                                                                                                                                                                                                                                                                                                                                                                                                                                                      | Department of Pathology, University of Cambridge                                                                                                                       | COVID-19 Genomics UK (COG-UK) Consortium                                                                                               | Aminu S. Jahun, Yasmin Chaudhry, Iliana Georgana, Myra Hosmillo, Rhys Izuagbe, William L. Hamilton, Martin D. Curran, Surendra Parmar, Ian Goodfellow                                                                                                                                                                                                                                                                                   |
| EPI_ISL_997050, EPI_ISL_997052, EPI_ISL_997053, EPI_ISL_997054, EPI_ISL_997055, EPI_ISL_997060, EPI_ISL_997069                                                                                                                                                                                                                                                                                                                                                                                                                                                                                                                                                                                                                                                                                                                                                                                                                                                                                                                                                                                                                                                                                                                                                                                                                                                                                                                                                                                                                                                                                                                                                                                                                                                                                                                                                                                                                                                                                                                                                                                                                                                                                                                                                                                                                                                                                                                                                                                                                                                                                                                                                                                                 | West of Scotland Specialist Virology Centre, NHSGGC / MRC-University of Glasgow Centre for Virus Research                                                              | COVID-19 Genomics UK (COG-UK) Consortium                                                                                               | Ana da Silva Filipe, Natasha Johnson, Kathy Smollett, Daniel Mair, Stephen Carmichael, Alice Broos, Lily Tong, Jenna Nichols, Kyriaki Nomikou; Sarah McDonald; Richard Orton, Joseph Hughes, Genu Vattipally, David L Robertson; Alasdair MacLean, Rory Gunson; Sharif Shaaban, Matthew Holden; Rachel Blacow, Sreenu Mollath, Kathy Li, James Shepherd, Antonia Ho, Emma Thomson                                                       |
| EPI_ISL_997072, EPI_ISL_997074, EPI_ISL_997075, EPI_ISL_997076, EPI_ISL_997077, EPI_ISL_997080, EPI_ISL_997081, EPI_ISL_997082, EPI_ISL_997083, EPI_ISL_997086, EPI_ISL_997090, EPI_ISL_997091, EPI_ISL_997093, EPI_ISL_997097, EPI_ISL_997098, EPI_ISL_997099, EPI_ISL_997100, EPI_ISL_997101, EPI_ISL_997104, EPI_ISL_997105, EPI_ISL_997106, EPI_ISL_997107, EPI_ISL_997109, EPI_ISL_997110, EPI_ISL_997120, EPI_ISL_997127, EPI_ISL_997129, EPI_ISL_997130, EPI_ISL_997132, EPI_ISL_997137, EPI_ISL_997138, EPI_ISL_997139, EPI_ISL_997143, EPI_ISL_997147, EPI_ISL_997148, EPI_ISL_997149, EPI_ISL_997155, EPI_ISL_997157, EPI_ISL_997158, EPI_ISL_997159, EPI_ISL_997161, EPI_ISL_997163, EPI_ISL_997164                                                                                                                                                                                                                                                                                                                                                                                                                                                                                                                                                                                                                                                                                                                                                                                                                                                                                                                                                                                                                                                                                                                                                                                                                                                                                                                                                                                                                                                                                                                                                                                                                                                                                                                                                                                                                                                                                                                                                                                                 |                                                                                                                                                                        |                                                                                                                                        |                                                                                                                                                                                                                                                                                                                                                                                                                                         |
| see above                                                                                                                                                                                                                                                                                                                                                                                                                                                                                                                                                                                                                                                                                                                                                                                                                                                                                                                                                                                                                                                                                                                                                                                                                                                                                                                                                                                                                                                                                                                                                                                                                                                                                                                                                                                                                                                                                                                                                                                                                                                                                                                                                                                                                                                                                                                                                                                                                                                                                                                                                                                                                                                                                                      | Virology Department, Royal Infirmary of Edinburgh, NHS Lothian / School of Biological Sciences, University of Edinburgh                                                | COVID-19 Genomics UK (COG-UK) Consortium                                                                                               | McHugh M, Dewar R, Cotton S, Rooke S, O'Toole Á, Scher E, Hill V, McCrone JT, Colquhoun R, Yu X, Jackson B, Rambaut A, Templeton K                                                                                                                                                                                                                                                                                                      |
| EPI_ISL_997192, EPI_ISL_997198, EPI_ISL_997202, EPI_ISL_997266, EPI_ISL_997273, EPI_ISL_997276, EPI_ISL_997281, EPI_ISL_997287, EPI_ISL_997324, EPI_ISL_997326, EPI_ISL_997327, EPI_ISL_997328, EPI_ISL_997329, EPI_ISL_997331, EPI_ISL_997332, EPI_ISL_997336, EPI_ISL_997337                                                                                                                                                                                                                                                                                                                                                                                                                                                                                                                                                                                                                                                                                                                                                                                                                                                                                                                                                                                                                                                                                                                                                                                                                                                                                                                                                                                                                                                                                                                                                                                                                                                                                                                                                                                                                                                                                                                                                                                                                                                                                                                                                                                                                                                                                                                                                                                                                                 |                                                                                                                                                                        |                                                                                                                                        |                                                                                                                                                                                                                                                                                                                                                                                                                                         |
| see above                                                                                                                                                                                                                                                                                                                                                                                                                                                                                                                                                                                                                                                                                                                                                                                                                                                                                                                                                                                                                                                                                                                                                                                                                                                                                                                                                                                                                                                                                                                                                                                                                                                                                                                                                                                                                                                                                                                                                                                                                                                                                                                                                                                                                                                                                                                                                                                                                                                                                                                                                                                                                                                                                                      | University of Exeter                                                                                                                                                   | COVID-19 Genomics UK (COG-UK) Consortium                                                                                               | Ben Temperton, Aaron Jeffries, Michelle Michelsen, Joanna Warwick-Dugdale, Audrey Farbos, Robyn Manley, Stephen Michell, Jane Masoli                                                                                                                                                                                                                                                                                                    |
| EPI_ISL_997640, EPI_ISL_997642, EPI_ISL_997646, EPI_ISL_997651, EPI_ISL_997654, EPI_ISL_997659, EPI_ISL_997662                                                                                                                                                                                                                                                                                                                                                                                                                                                                                                                                                                                                                                                                                                                                                                                                                                                                                                                                                                                                                                                                                                                                                                                                                                                                                                                                                                                                                                                                                                                                                                                                                                                                                                                                                                                                                                                                                                                                                                                                                                                                                                                                                                                                                                                                                                                                                                                                                                                                                                                                                                                                 | Barts Health NHS Trust                                                                                                                                                 | COVID-19 Genomics UK (COG-UK) Consortium                                                                                               | CUTINO-MOGUEL, Maria-Teresa; HARRINGTON, David; OWOYEMI, Dola; KULASEGARAN-SHYLINI, Raghavendran; BROAD, Claire; KELE, Beatrix                                                                                                                                                                                                                                                                                                          |
| EPI_ISL_998101, EPI_ISL_998108, EPI_ISL_998114, EPI_ISL_998120, EPI_ISL_998123, EPI_ISL_998125                                                                                                                                                                                                                                                                                                                                                                                                                                                                                                                                                                                                                                                                                                                                                                                                                                                                                                                                                                                                                                                                                                                                                                                                                                                                                                                                                                                                                                                                                                                                                                                                                                                                                                                                                                                                                                                                                                                                                                                                                                                                                                                                                                                                                                                                                                                                                                                                                                                                                                                                                                                                                 | Virology Department, Sheffield Teaching Hospitals NHS Foundation Trust/Department of Infection, Immunity and Cardiovascular Disease, The Medical School, University of | COVID-19 Genomics UK (COG-UK) Consortium                                                                                               | Thushan de Silva, Matthew Parker, Nikki Smith, Adri Angyal, Rebecca Brown, Luke Green, Rachel Tucker, Paul Parsons, Danielle Groves, Katie Johnson, Laura Carrilero, Alex Keeley, Dave Partridge, Matthew Wyles, Benjamin Lindsey, Mehmet Yavuz, Mohammad Raza, Cariad Evans                                                                                                                                                            |

|                                                                                                                                                                                                                                                                                                                                                                                                                                                                                                                                                                                                                                                                                                                                                                                                                                                                                                                                                                                                                                                                                                                                                                                                                                                                                                                                                                                                                                                                                                                                                                                                                                                                                                                                                                                                                                                                                                                                                                                                                                                                                                                                                                                                                                                                                                                                                                                                                                                                                                                                                                                                                                                                                                                                                                                                                                                                                                                                                                                                                                                                                                                                                                                                                                                                                                                                                                                                                                                                                                                                                                                                                                                                                                                                                                                                                                                                                                                                                                                                                                                                                                                                                                                                                                                                                                                                                                                                                                                                                                                                                                                                                                                                                                                                                                                                                                                                                                                                                                                                                                                                                                                                                                                                                                                                                                                                                                                                                                                                                                                                                                                                                                                                                                                                                                                                                                                                                                                                                                                                                                                |                                                                                                                                                                                                                     |                                                                           |                                                                                                                                                                                                                                                                                                                                                                                                                                                            |
|------------------------------------------------------------------------------------------------------------------------------------------------------------------------------------------------------------------------------------------------------------------------------------------------------------------------------------------------------------------------------------------------------------------------------------------------------------------------------------------------------------------------------------------------------------------------------------------------------------------------------------------------------------------------------------------------------------------------------------------------------------------------------------------------------------------------------------------------------------------------------------------------------------------------------------------------------------------------------------------------------------------------------------------------------------------------------------------------------------------------------------------------------------------------------------------------------------------------------------------------------------------------------------------------------------------------------------------------------------------------------------------------------------------------------------------------------------------------------------------------------------------------------------------------------------------------------------------------------------------------------------------------------------------------------------------------------------------------------------------------------------------------------------------------------------------------------------------------------------------------------------------------------------------------------------------------------------------------------------------------------------------------------------------------------------------------------------------------------------------------------------------------------------------------------------------------------------------------------------------------------------------------------------------------------------------------------------------------------------------------------------------------------------------------------------------------------------------------------------------------------------------------------------------------------------------------------------------------------------------------------------------------------------------------------------------------------------------------------------------------------------------------------------------------------------------------------------------------------------------------------------------------------------------------------------------------------------------------------------------------------------------------------------------------------------------------------------------------------------------------------------------------------------------------------------------------------------------------------------------------------------------------------------------------------------------------------------------------------------------------------------------------------------------------------------------------------------------------------------------------------------------------------------------------------------------------------------------------------------------------------------------------------------------------------------------------------------------------------------------------------------------------------------------------------------------------------------------------------------------------------------------------------------------------------------------------------------------------------------------------------------------------------------------------------------------------------------------------------------------------------------------------------------------------------------------------------------------------------------------------------------------------------------------------------------------------------------------------------------------------------------------------------------------------------------------------------------------------------------------------------------------------------------------------------------------------------------------------------------------------------------------------------------------------------------------------------------------------------------------------------------------------------------------------------------------------------------------------------------------------------------------------------------------------------------------------------------------------------------------------------------------------------------------------------------------------------------------------------------------------------------------------------------------------------------------------------------------------------------------------------------------------------------------------------------------------------------------------------------------------------------------------------------------------------------------------------------------------------------------------------------------------------------------------------------------------------------------------------------------------------------------------------------------------------------------------------------------------------------------------------------------------------------------------------------------------------------------------------------------------------------------------------------------------------------------------------------------------------------------------------------------------------------------------|---------------------------------------------------------------------------------------------------------------------------------------------------------------------------------------------------------------------|---------------------------------------------------------------------------|------------------------------------------------------------------------------------------------------------------------------------------------------------------------------------------------------------------------------------------------------------------------------------------------------------------------------------------------------------------------------------------------------------------------------------------------------------|
| EPI_ISL_998127, EPI_ISL_998131                                                                                                                                                                                                                                                                                                                                                                                                                                                                                                                                                                                                                                                                                                                                                                                                                                                                                                                                                                                                                                                                                                                                                                                                                                                                                                                                                                                                                                                                                                                                                                                                                                                                                                                                                                                                                                                                                                                                                                                                                                                                                                                                                                                                                                                                                                                                                                                                                                                                                                                                                                                                                                                                                                                                                                                                                                                                                                                                                                                                                                                                                                                                                                                                                                                                                                                                                                                                                                                                                                                                                                                                                                                                                                                                                                                                                                                                                                                                                                                                                                                                                                                                                                                                                                                                                                                                                                                                                                                                                                                                                                                                                                                                                                                                                                                                                                                                                                                                                                                                                                                                                                                                                                                                                                                                                                                                                                                                                                                                                                                                                                                                                                                                                                                                                                                                                                                                                                                                                                                                                 | Sheffield                                                                                                                                                                                                           |                                                                           |                                                                                                                                                                                                                                                                                                                                                                                                                                                            |
| EPI_ISL_998234                                                                                                                                                                                                                                                                                                                                                                                                                                                                                                                                                                                                                                                                                                                                                                                                                                                                                                                                                                                                                                                                                                                                                                                                                                                                                                                                                                                                                                                                                                                                                                                                                                                                                                                                                                                                                                                                                                                                                                                                                                                                                                                                                                                                                                                                                                                                                                                                                                                                                                                                                                                                                                                                                                                                                                                                                                                                                                                                                                                                                                                                                                                                                                                                                                                                                                                                                                                                                                                                                                                                                                                                                                                                                                                                                                                                                                                                                                                                                                                                                                                                                                                                                                                                                                                                                                                                                                                                                                                                                                                                                                                                                                                                                                                                                                                                                                                                                                                                                                                                                                                                                                                                                                                                                                                                                                                                                                                                                                                                                                                                                                                                                                                                                                                                                                                                                                                                                                                                                                                                                                 | Regional Virus Laboratory, Belfast Health and Social Care Trust                                                                                                                                                     | COVID-19 Genomics UK (COG-UK) Consortium                                  | Conall McCaughey, James McKenna, Tanya Curran, Susan Feeney, Alison Watt, Ciara Cox, Mairead Connor, Zoltan Molnar, David Simpson, Derek Fairley                                                                                                                                                                                                                                                                                                           |
| EPI_ISL_998336, EPI_ISL_998338, EPI_ISL_998415, EPI_ISL_998433, EPI_ISL_998437, EPI_ISL_998567, EPI_ISL_998569, EPI_ISL_998573, EPI_ISL_998574, EPI_ISL_998575                                                                                                                                                                                                                                                                                                                                                                                                                                                                                                                                                                                                                                                                                                                                                                                                                                                                                                                                                                                                                                                                                                                                                                                                                                                                                                                                                                                                                                                                                                                                                                                                                                                                                                                                                                                                                                                                                                                                                                                                                                                                                                                                                                                                                                                                                                                                                                                                                                                                                                                                                                                                                                                                                                                                                                                                                                                                                                                                                                                                                                                                                                                                                                                                                                                                                                                                                                                                                                                                                                                                                                                                                                                                                                                                                                                                                                                                                                                                                                                                                                                                                                                                                                                                                                                                                                                                                                                                                                                                                                                                                                                                                                                                                                                                                                                                                                                                                                                                                                                                                                                                                                                                                                                                                                                                                                                                                                                                                                                                                                                                                                                                                                                                                                                                                                                                                                                                                 | Northumbria University / South Tees Hospitals NHS Foundation Trust / North Cumbria Integrated Care NHS Foundation Trust / North Tees and Hartlepool NHS Foundation Trust / Newcastle Hospitals NHS Foundation Trust | COVID-19 Genomics UK (COG-UK) Consortium                                  | Darren L Smith, Andrew Nelson, Matthew Bashton, Greg R Young, Joshua Loh, John Allan, Mohammad A Tariq, Giles S Holt, Gary Black, Wen C Yew, Lynn Dover, Paul Baker, Steve Liggett, Sarah Essex, Jane Greenaway, Debra Padgett, Clive Graham, Garren Scott, Edward Barton, Emma Swindells, Brendan Payne, Jennifer Collins, Yusri Taha, Gary Eltringham                                                                                                    |
| EPI_ISL_998847, EPI_ISL_998849, EPI_ISL_998857, EPI_ISL_998863, EPI_ISL_998885, EPI_ISL_998886                                                                                                                                                                                                                                                                                                                                                                                                                                                                                                                                                                                                                                                                                                                                                                                                                                                                                                                                                                                                                                                                                                                                                                                                                                                                                                                                                                                                                                                                                                                                                                                                                                                                                                                                                                                                                                                                                                                                                                                                                                                                                                                                                                                                                                                                                                                                                                                                                                                                                                                                                                                                                                                                                                                                                                                                                                                                                                                                                                                                                                                                                                                                                                                                                                                                                                                                                                                                                                                                                                                                                                                                                                                                                                                                                                                                                                                                                                                                                                                                                                                                                                                                                                                                                                                                                                                                                                                                                                                                                                                                                                                                                                                                                                                                                                                                                                                                                                                                                                                                                                                                                                                                                                                                                                                                                                                                                                                                                                                                                                                                                                                                                                                                                                                                                                                                                                                                                                                                                 | Quadram Institute Bioscience                                                                                                                                                                                        | COVID-19 Genomics UK (COG-UK) Consortium                                  | Dave J. Baker, Gemma L. Kay, Alp Aydin, Thanh Le-Viet, Steven Rudder, Ana P. Tedim, Anastasia Kolyva, Maria Diaz, Leonardo de Oliveira Martins, Nabil-Fareed Alikhan, Lizzie Meadows, Rachael Stanley, Ngozi Elumogo, Muhammed Yasir, Nicholas M. Thomson, Alexander J Trotter, Rachel Gilroy, Samuel Bloomfield, Claire Stuart, Andrew Bell, Reenesha Prakash, Samir Dervisevic, Alison E. Mather, John Wain, Mark Webber, Andrew J. Page, Justin O'Grady |
| EPI_ISL_998946, EPI_ISL_998952, EPI_ISL_998977, EPI_ISL_998978                                                                                                                                                                                                                                                                                                                                                                                                                                                                                                                                                                                                                                                                                                                                                                                                                                                                                                                                                                                                                                                                                                                                                                                                                                                                                                                                                                                                                                                                                                                                                                                                                                                                                                                                                                                                                                                                                                                                                                                                                                                                                                                                                                                                                                                                                                                                                                                                                                                                                                                                                                                                                                                                                                                                                                                                                                                                                                                                                                                                                                                                                                                                                                                                                                                                                                                                                                                                                                                                                                                                                                                                                                                                                                                                                                                                                                                                                                                                                                                                                                                                                                                                                                                                                                                                                                                                                                                                                                                                                                                                                                                                                                                                                                                                                                                                                                                                                                                                                                                                                                                                                                                                                                                                                                                                                                                                                                                                                                                                                                                                                                                                                                                                                                                                                                                                                                                                                                                                                                                 | Lincolnshire Hospitals and DeepSeq Nottingham                                                                                                                                                                       | COVID-19 Genomics UK (COG-UK) Consortium                                  | Nichola Duckworth, Tim Sloan, Sarah Walsh, Jonathan Ball, Patrick McClure, Joeseeph Chappell, Nadine Holmes, Matthew Carlisle, Christopher Moore, Fei Sang, Johnny Debebe, Victoria Wright, Matthew Loose                                                                                                                                                                                                                                                  |
| EPI_ISL_998986, EPI_ISL_998987, EPI_ISL_998988, EPI_ISL_998992, EPI_ISL_998994, EPI_ISL_998995, EPI_ISL_998996, EPI_ISL_998997, EPI_ISL_999000, EPI_ISL_999001, EPI_ISL_999002, EPI_ISL_999004, EPI_ISL_999005, EPI_ISL_999006, EPI_ISL_999008, EPI_ISL_999009, EPI_ISL_999010, EPI_ISL_999012, EPI_ISL_999013, EPI_ISL_999014, EPI_ISL_999015, EPI_ISL_999017, EPI_ISL_999018, EPI_ISL_999019, EPI_ISL_999020, EPI_ISL_999021, EPI_ISL_999023, EPI_ISL_999025, EPI_ISL_999027, EPI_ISL_999029, EPI_ISL_999033, EPI_ISL_999034, EPI_ISL_999035, EPI_ISL_999036, EPI_ISL_999037, EPI_ISL_999038, EPI_ISL_999039, EPI_ISL_999040, EPI_ISL_999041, EPI_ISL_999042, EPI_ISL_999044, EPI_ISL_999045, EPI_ISL_999048, EPI_ISL_999049, EPI_ISL_999050, EPI_ISL_999051, EPI_ISL_999052, EPI_ISL_999054, EPI_ISL_999055, EPI_ISL_999056, EPI_ISL_999057, EPI_ISL_999058, EPI_ISL_999059, EPI_ISL_999060, EPI_ISL_999061, EPI_ISL_999062, EPI_ISL_999063, EPI_ISL_999064, EPI_ISL_999065, EPI_ISL_999066, EPI_ISL_999067, EPI_ISL_999071, EPI_ISL_999076, EPI_ISL_999077, EPI_ISL_999078, EPI_ISL_999080, EPI_ISL_999081, EPI_ISL_999083, EPI_ISL_999084, EPI_ISL_999085, EPI_ISL_999086, EPI_ISL_999087, EPI_ISL_999088, EPI_ISL_999089, EPI_ISL_999092, EPI_ISL_999093, EPI_ISL_999094, EPI_ISL_999095, EPI_ISL_999099, EPI_ISL_999100, EPI_ISL_999101, EPI_ISL_999102, EPI_ISL_999103, EPI_ISL_999104, EPI_ISL_999105, EPI_ISL_999106, EPI_ISL_999108, EPI_ISL_999109, EPI_ISL_999111, EPI_ISL_999112, EPI_ISL_999113, EPI_ISL_999114, EPI_ISL_999116, EPI_ISL_999119, EPI_ISL_999120, EPI_ISL_999121, EPI_ISL_999122, EPI_ISL_999123, EPI_ISL_999124, EPI_ISL_999125, EPI_ISL_999126, EPI_ISL_999127, EPI_ISL_999128, EPI_ISL_999132, EPI_ISL_999133, EPI_ISL_999134, EPI_ISL_999136, EPI_ISL_999137, EPI_ISL_999138, EPI_ISL_999139, EPI_ISL_999141, EPI_ISL_999142, EPI_ISL_999143, EPI_ISL_999144, EPI_ISL_999145, EPI_ISL_999146, EPI_ISL_999148, EPI_ISL_999149, EPI_ISL_999150, EPI_ISL_999151, EPI_ISL_999152, EPI_ISL_999154, EPI_ISL_999157, EPI_ISL_999158, EPI_ISL_999159, EPI_ISL_999160, EPI_ISL_999161, EPI_ISL_999162, EPI_ISL_999163, EPI_ISL_999164, EPI_ISL_999166, EPI_ISL_999168, EPI_ISL_999169, EPI_ISL_999170, EPI_ISL_999173, EPI_ISL_999174, EPI_ISL_999175, EPI_ISL_999177, EPI_ISL_999178, EPI_ISL_999179, EPI_ISL_999180, EPI_ISL_999182, EPI_ISL_999183, EPI_ISL_999184, EPI_ISL_999185, EPI_ISL_999186, EPI_ISL_999187, EPI_ISL_999188, EPI_ISL_999189, EPI_ISL_999190, EPI_ISL_999191, EPI_ISL_999192, EPI_ISL_999193, EPI_ISL_999194, EPI_ISL_999196, EPI_ISL_999197, EPI_ISL_999198, EPI_ISL_999199, EPI_ISL_999200, EPI_ISL_999201, EPI_ISL_999202, EPI_ISL_999203, EPI_ISL_999204, EPI_ISL_999205, EPI_ISL_999207, EPI_ISL_999208, EPI_ISL_999210, EPI_ISL_999211, EPI_ISL_999212, EPI_ISL_999213, EPI_ISL_999216, EPI_ISL_999217, EPI_ISL_999219, EPI_ISL_999222, EPI_ISL_999223, EPI_ISL_999224, EPI_ISL_999225, EPI_ISL_999226, EPI_ISL_999227, EPI_ISL_999228, EPI_ISL_999229, EPI_ISL_999230, EPI_ISL_999232, EPI_ISL_999234, EPI_ISL_999235, EPI_ISL_999238, EPI_ISL_999239, EPI_ISL_999241, EPI_ISL_999242, EPI_ISL_999243, EPI_ISL_999244, EPI_ISL_999245, EPI_ISL_999246, EPI_ISL_999248, EPI_ISL_999249, EPI_ISL_999251, EPI_ISL_999252, EPI_ISL_999253, EPI_ISL_999254, EPI_ISL_999257, EPI_ISL_999258, EPI_ISL_999259, EPI_ISL_999262, EPI_ISL_999263, EPI_ISL_999265, EPI_ISL_999267, EPI_ISL_999268, EPI_ISL_999269, EPI_ISL_999274, EPI_ISL_999276, EPI_ISL_999278, EPI_ISL_999279, EPI_ISL_999281, EPI_ISL_999282, EPI_ISL_999283, EPI_ISL_999284, EPI_ISL_999287, EPI_ISL_999289, EPI_ISL_999291, EPI_ISL_999292, EPI_ISL_999293, EPI_ISL_999296, EPI_ISL_999297, EPI_ISL_999298, EPI_ISL_999300, EPI_ISL_999301, EPI_ISL_999302, EPI_ISL_999303, EPI_ISL_999307, EPI_ISL_999310, EPI_ISL_999311, EPI_ISL_999314, EPI_ISL_999317, EPI_ISL_999318, EPI_ISL_999320, EPI_ISL_999322, EPI_ISL_999323, EPI_ISL_999324, EPI_ISL_999325, EPI_ISL_999326, EPI_ISL_999328, EPI_ISL_999329, EPI_ISL_999331, EPI_ISL_999332, EPI_ISL_999335, EPI_ISL_999337, EPI_ISL_999339, EPI_ISL_999340, EPI_ISL_999342, EPI_ISL_999343, EPI_ISL_999344, EPI_ISL_999345, EPI_ISL_999346, EPI_ISL_999347, EPI_ISL_999348, EPI_ISL_999350, EPI_ISL_999351, EPI_ISL_999352, EPI_ISL_999353, EPI_ISL_999355, EPI_ISL_999360, EPI_ISL_999362, EPI_ISL_999364, EPI_ISL_999365, EPI_ISL_999368, EPI_ISL_999369, EPI_ISL_999370, EPI_ISL_999372, EPI_ISL_999373, EPI_ISL_999374, EPI_ISL_999377, EPI_ISL_999378, EPI_ISL_999379, EPI_ISL_999381, EPI_ISL_999382, EPI_ISL_999383, EPI_ISL_999384, EPI_ISL_999385, EPI_ISL_999386, EPI_ISL_999390, EPI_ISL_999391, EPI_ISL_999394, EPI_ISL_999395, EPI_ISL_999396, EPI_ISL_999397, EPI_ISL_999399, EPI_ISL_999401, EPI_ISL_999402, EPI_ISL_999404, EPI_ISL_999405, EPI_ISL_999406, EPI_ISL_999407, EPI_ISL_999408, EPI_ISL_999410, EPI_ISL_999411, EPI_ISL_999412, EPI_ISL_999413, EPI_ISL_999414, EPI_ISL_999418, EPI_ISL_999420, EPI_ISL_999423, EPI_ISL_999424, EPI_ISL_999425, EPI_ISL_999426, EPI_ISL_999427, EPI_ISL_999431, EPI_ISL_999432, EPI_ISL_999433, EPI_ISL_999434, EPI_ISL_999437, EPI_ISL_999438, EPI_ISL_999440, EPI_ISL_999443, EPI_ISL_999444, EPI_ISL_999445, EPI_ISL_999446, EPI_ISL_999447, EPI_ISL_999449, EPI_ISL_999452, EPI_ISL_999453, EPI_ISL_999454, EPI_ISL_999455, EPI_ISL_999456, EPI_ISL_999458, EPI_ISL_999460, EPI_ISL_999463, EPI_ISL_999465, EPI_ISL_999466, EPI_ISL_999467, EPI_ISL_999469, EPI_ISL_999470, EPI_ISL_999471, EPI_ISL_999472, EPI_ISL_999473, EPI_ISL_999474, EPI_ISL_999475, EPI_ISL_999476, EPI_ISL_999478, EPI_ISL_999481, EPI_ISL_999482, EPI_ISL_999484, EPI_ISL_999485, EPI_ISL_999486, EPI_ISL_999487, EPI_ISL_999488, EPI_ISL_999489, EPI_ISL_999490, EPI_ISL_999491, EPI_ISL_999493, EPI_ISL_999496, EPI_ISL_999497, EPI_ISL_999498, EPI_ISL_999500, EPI_ISL_999501, EPI_ISL_999505, EPI_ISL_999506, EPI_ISL_999507, EPI_ISL_999509, EPI_ISL_999510, EPI_ISL_999511, EPI_ISL_999512, EPI_ISL_999513, EPI_ISL_999514 |                                                                                                                                                                                                                     |                                                                           |                                                                                                                                                                                                                                                                                                                                                                                                                                                            |
| see above                                                                                                                                                                                                                                                                                                                                                                                                                                                                                                                                                                                                                                                                                                                                                                                                                                                                                                                                                                                                                                                                                                                                                                                                                                                                                                                                                                                                                                                                                                                                                                                                                                                                                                                                                                                                                                                                                                                                                                                                                                                                                                                                                                                                                                                                                                                                                                                                                                                                                                                                                                                                                                                                                                                                                                                                                                                                                                                                                                                                                                                                                                                                                                                                                                                                                                                                                                                                                                                                                                                                                                                                                                                                                                                                                                                                                                                                                                                                                                                                                                                                                                                                                                                                                                                                                                                                                                                                                                                                                                                                                                                                                                                                                                                                                                                                                                                                                                                                                                                                                                                                                                                                                                                                                                                                                                                                                                                                                                                                                                                                                                                                                                                                                                                                                                                                                                                                                                                                                                                                                                      | Oxford Viromics, NDM, University of Oxford; Oxford University Hospitals; Basingstoke and North Hampshire Hospital                                                                                                   | COVID-19 Genomics UK (COG-UK) Consortium                                  | Tanya Golubchik, David Bonsall, George Macintyre, Amy Trebes, Mariateresa de Cesare, Catrin Moore, Alex Mobbs, Anita Justice, Robert Shaw, Monique Andersson, Timothy Peto, Emma Wise, Nathan Moore, Jessica Lynch, Nick Cortes, Matilde Mori, Stephen Kidd, David Buck, John Todd, Christophe Fraser                                                                                                                                                      |
| EPI_ISL_999518, EPI_ISL_999519, EPI_ISL_999520, EPI_ISL_999521, EPI_ISL_999530, EPI_ISL_999546, EPI_ISL_999552, EPI_ISL_999561, EPI_ISL_999566, EPI_ISL_999567, EPI_ISL_999569, EPI_ISL_999580, EPI_ISL_999582, EPI_ISL_999589, EPI_ISL_999609, EPI_ISL_999634, EPI_ISL_999664, EPI_ISL_999669, EPI_ISL_999684, EPI_ISL_999720, EPI_ISL_999729, EPI_ISL_999756, EPI_ISL_999808, EPI_ISL_999824, EPI_ISL_999830                                                                                                                                                                                                                                                                                                                                                                                                                                                                                                                                                                                                                                                                                                                                                                                                                                                                                                                                                                                                                                                                                                                                                                                                                                                                                                                                                                                                                                                                                                                                                                                                                                                                                                                                                                                                                                                                                                                                                                                                                                                                                                                                                                                                                                                                                                                                                                                                                                                                                                                                                                                                                                                                                                                                                                                                                                                                                                                                                                                                                                                                                                                                                                                                                                                                                                                                                                                                                                                                                                                                                                                                                                                                                                                                                                                                                                                                                                                                                                                                                                                                                                                                                                                                                                                                                                                                                                                                                                                                                                                                                                                                                                                                                                                                                                                                                                                                                                                                                                                                                                                                                                                                                                                                                                                                                                                                                                                                                                                                                                                                                                                                                                 |                                                                                                                                                                                                                     |                                                                           |                                                                                                                                                                                                                                                                                                                                                                                                                                                            |
| see above                                                                                                                                                                                                                                                                                                                                                                                                                                                                                                                                                                                                                                                                                                                                                                                                                                                                                                                                                                                                                                                                                                                                                                                                                                                                                                                                                                                                                                                                                                                                                                                                                                                                                                                                                                                                                                                                                                                                                                                                                                                                                                                                                                                                                                                                                                                                                                                                                                                                                                                                                                                                                                                                                                                                                                                                                                                                                                                                                                                                                                                                                                                                                                                                                                                                                                                                                                                                                                                                                                                                                                                                                                                                                                                                                                                                                                                                                                                                                                                                                                                                                                                                                                                                                                                                                                                                                                                                                                                                                                                                                                                                                                                                                                                                                                                                                                                                                                                                                                                                                                                                                                                                                                                                                                                                                                                                                                                                                                                                                                                                                                                                                                                                                                                                                                                                                                                                                                                                                                                                                                      | Originating lab: Wales Specialist Virology Centre Sequencing lab: Pathogen Genomics Unit                                                                                                                            | Public Health Wales Microbiology Cardiff Wales Specialist Virology Centre | Catherine Moore, Johnathan Evans, Laura Gifford, Malorie Perry, Simon Cottrell, Angela Marchbank, Alec Birchley, Alexander Adams, Amy Gaskin, Bree Gatica-Wilcox, Jason Coombes, Joel Southgate, Lauren Gilbert, Lee Graham, Nicole Pacchiarini, Sara Kumziene-Summerhayes, Sarah Taylor, Sophie Jones, Sara Rey, Matthew Bull, Joanne Watkins, Sally Corden, Tom Connor                                                                                   |
